# Supplementary material
Source: ML conference proceedings conference paper supplement (https://openreview.net/forum?id=smdbra3VEi)
Supplement: supplementary_material [file rr_acc_aqua_Qwen3-0.6B_llama70.pdf › Routing_SLM_LLMs/Uncertainty-based Routing/w_legend/to_llama70/rr_acc_aqua_Qwen3-0.6B_llama70.pdf]

# AQuA, Qwen3-0.6B to Llama-3.1-70B

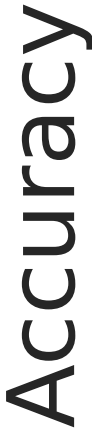

- average-token-prob
- verbalization-1s
- verbalization-2s
- p(true)
- trained-probe
- perplexity
- jaccard-degree
- ood-probe
