# Supplementary material
Source: ML conference proceedings conference paper supplement (https://openreview.net/forum?id=smdbra3VEi)
Supplement: supplementary_material [file rr_acc_commonsense_qa_granite-3.1-8b_dsR1.pdf › Routing_SLM_LLMs/Uncertainty-based Routing/w_legend/to_dsR1/rr_acc_commonsense_qa_granite-3.1-8b_dsR1.pdf]

# CommonsenseQA, granite-3.1-8b to DeepSeek-R1

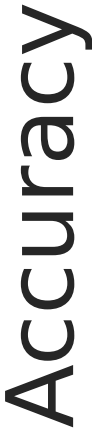

average-token-prob  
verbalization-1s  
verbalization-2s  
p(true)  
trained-probe  
perplexity  
jaccard-degree  
ood-probe
