# Supplementary material
Source: ML conference proceedings conference paper supplement (https://openreview.net/forum?id=smdbra3VEi)
Supplement: supplementary_material [file rr_acc_hellaswag_llama-3.2-1b_gpt41.pdf › Routing_SLM_LLMs/Uncertainty-based Routing/w_legend/to_gpt41/rr_acc_hellaswag_llama-3.2-1b_gpt41.pdf]

# HellaSwag, llama-3.2-1b to GPT-4.1 mini

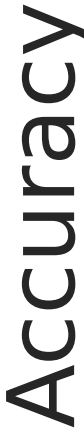

average-token-prob  
verbalization-1s  
verbalization-2s  
p(true)  
trained-probe  
perplexity  
jaccard-degree  
ood-probe
