# Supplementary material
Source: ML conference proceedings conference paper supplement (https://openreview.net/forum?id=smdbra3VEi)
Supplement: supplementary_material [file rr_acc_hellaswag_llama-3.2-3b_gpt41.pdf › Routing_SLM_LLMs/Uncertainty-based Routing/w_legend/to_gpt41/rr_acc_hellaswag_llama-3.2-3b_gpt41.pdf]

average-token-prob

verbalization-1s

verbalization-2s

p(true)

trained-probe

perplexity

jaccard-degree

ood-probe

Routing Ratio

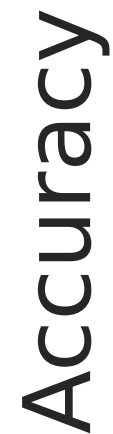

|                    |  |
|--------------------|--|
| average-token-prob |  |
| verbalization-1s   |  |
| verbalization-2s   |  |
| p(true)            |  |
| trained-probe      |  |
| perplexity         |  |
| jaccard-degree     |  |
| ood-probe          |  |
