# Supplementary material
Source: ML conference proceedings conference paper supplement (https://openreview.net/forum?id=smdbra3VEi)
Supplement: supplementary_material [file rr_acc_hellaswag_Qwen3-1.7B_dsR1.pdf › Routing_SLM_LLMs/Uncertainty-based Routing/w_legend/to_dsR1/rr_acc_hellaswag_Qwen3-1.7B_dsR1.pdf]

**HellaSwag, Qwen3-1.7B to DeepSeek-R1**

Accuracy

0.80  
0.75  
0.70  
0.65  
0.60  
0.55

0.00

0.25

0.50

0.75

1.00

Routing Ratio

- average-token-prob
- verbalization-1s
- verbalization-2s
- p(true)
- trained-probe
- perplexity
- jaccard-degree
- ood-probe
