# Supplementary material
Source: ML conference proceedings conference paper supplement (https://openreview.net/forum?id=smdbra3VEi)
Supplement: supplementary_material [file rr_acc_math_500_rwkv_dsR1.pdf › Routing_SLM_LLMs/Uncertainty-based Routing/w_legend/to_dsR1/rr_acc_math_500_rwkv_dsR1.pdf]

# MATH-500, rwkv to DeepSeek-R1

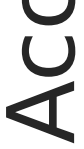

|                    |
|--------------------|
| average-token-prob |
| verbalization-1s   |
| verbalization-2s   |
| p(true)            |
| trained-probe      |
| perplexity         |
| jaccard-degree     |
| ood-probe          |
