# Supplementary material
Source: ML conference proceedings conference paper supplement (https://openreview.net/forum?id=smdbra3VEi)
Supplement: supplementary_material [file rr_acc_mmlu_phi-4-mini-reasoning_gpt41.pdf › Routing_SLM_LLMs/Uncertainty-based Routing/w_legend/to_gpt41/rr_acc_mmlu_phi-4-mini-reasoning_gpt41.pdf]

# MMLU, phi-4-mini-reasoning to GPT-4.1 mini

Accuracy

0.850  
0.825  
0.800  
0.775  
0.750  
0.725  
0.700

0.00

0.25

0.50

0.75

1.00

Routing Ratio

- average-token-prob
- verbalization-1s
- verbalization-2s
- p(true)
- trained-probe
- perplexity
- jaccard-degree
- ood-probe
