# Supplementary material
Source: ML conference proceedings conference paper supplement (https://openreview.net/forum?id=smdbra3VEi)
Supplement: supplementary_material [file rr_acc_multiarith_phi-3.5-mini_gpt41.pdf › Routing_SLM_LLMs/Uncertainty-based Routing/w_legend/to_gpt41/rr_acc_multiarith_phi-3.5-mini_gpt41.pdf]

# MultiArith, phi-3.5-mini to GPT-4.1 mini

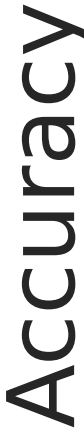

average-token-prob

verbalization-1s

## verbalization-2s

$p(\text{true})$

trained-probe

perplexity

jaccard-degree

ood-probe
