# Supplementary material
Source: ML conference proceedings conference paper supplement (https://openreview.net/forum?id=smdbra3VEi)

The graph plots eight metrics against the Routing Ratio. The x-axis, labeled 'Routing Ratio', ranges from 0.0 to 1.0. The y-axis represents the values of these metrics. The metrics are: average-token-prob (pink line), verbalization-1s (teal line), verbalization-2s (orange line), p(true) (red line), trained-probe (blue line), perplexity (purple line), jaccard-degree (tan line), and ood-probe (grey line). All metrics show an upward trend as the routing ratio increases. 'perplexity' and 'average-token-prob' start at higher values (around 0.4 and 0.35 respectively) and increase to 1.0. 'verbalization-1s' starts at the lowest value (around 0.1) and increases to 1.0. 'p(true)' and 'trained-probe' start around 0.2 and 0.25 respectively and increase to 1.0. 'jaccard-degree' and 'ood-probe' start around 0.3 and 0.35 respectively and increase to 1.0. 'verbalization-2s' starts around 0.25 and increases to 1.0.

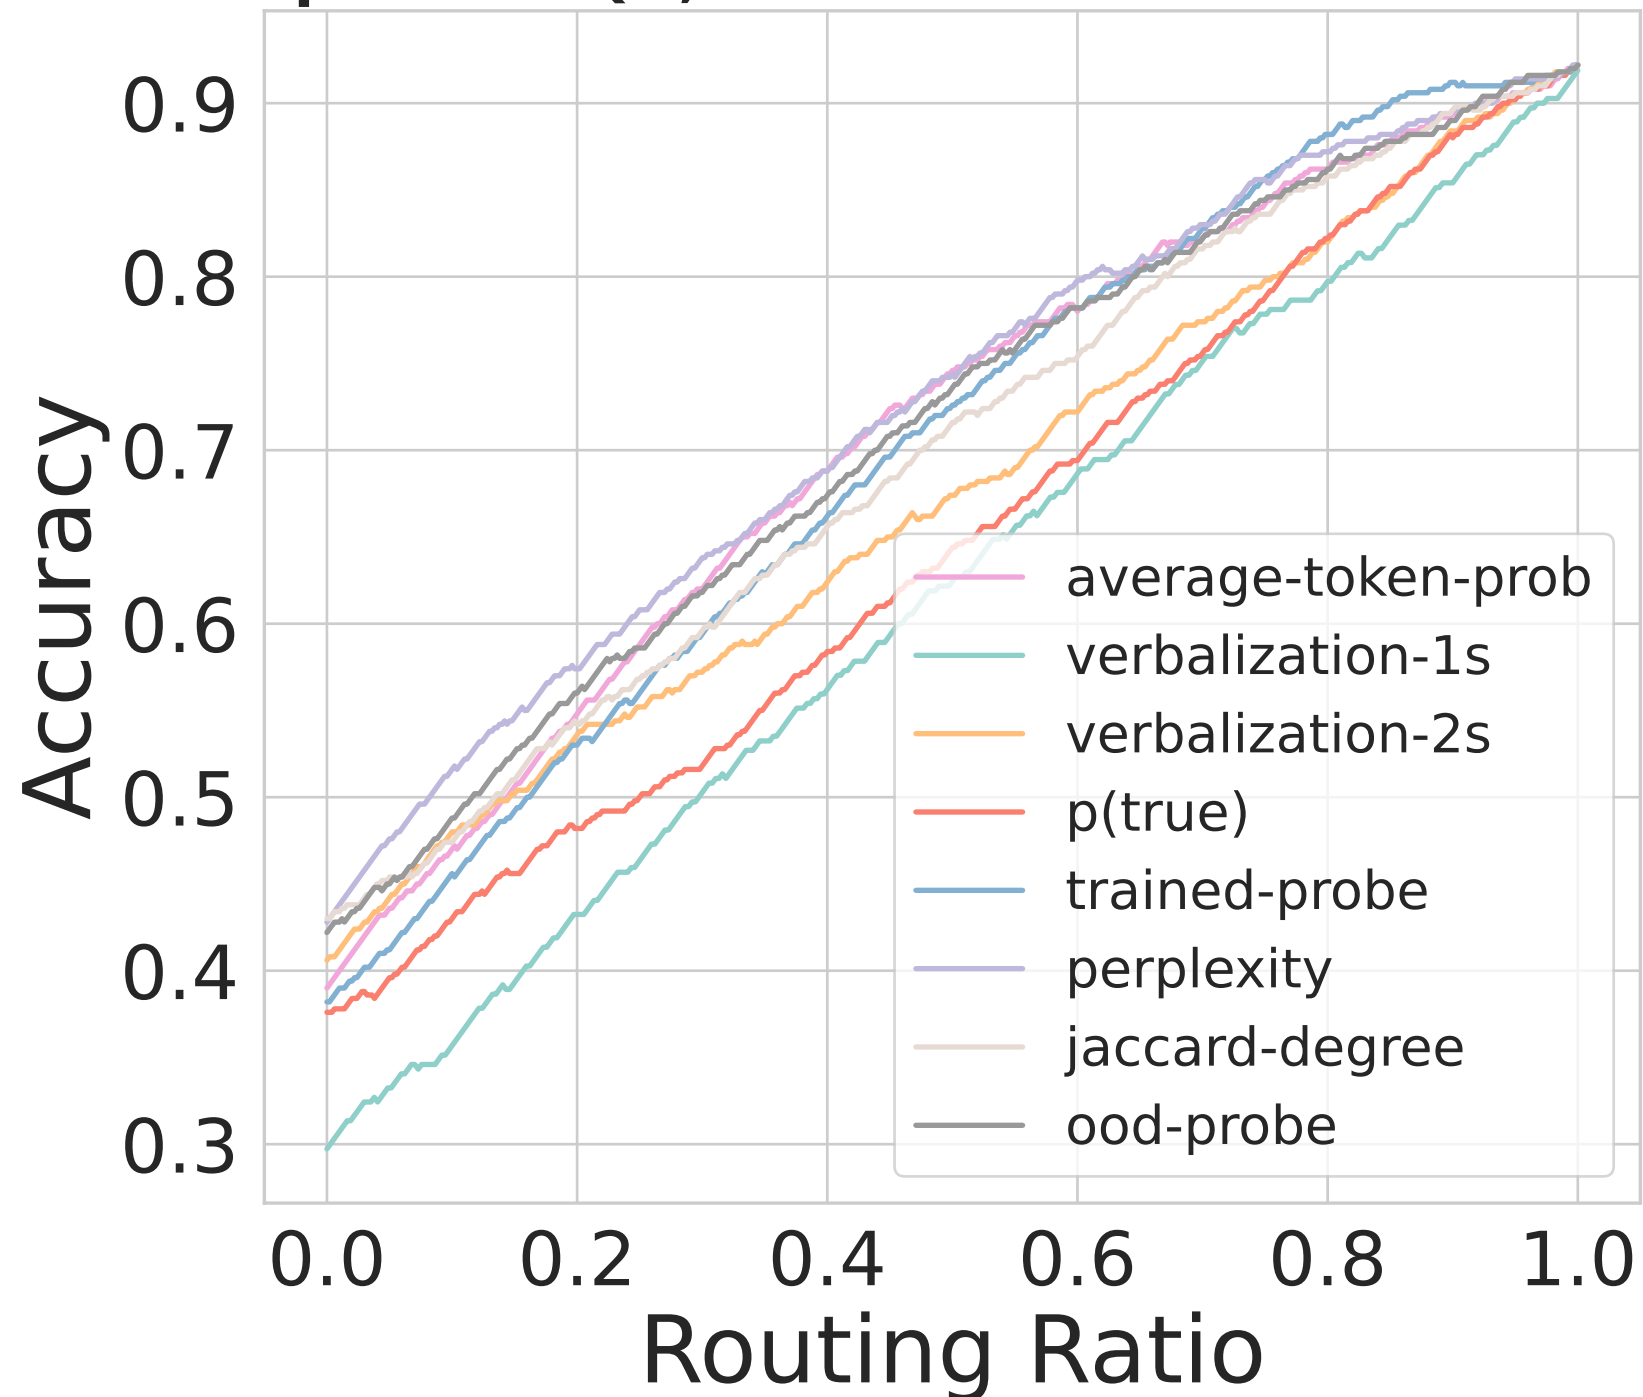

Supplement: supplementary_material [file rr_acc_openbook_qa_llama-3.2-1b_gpt41.pdf › Routing_SLM_LLMs/Uncertainty-based Routing/w_legend/to_gpt41/rr_acc_openbook_qa_llama-3.2-1b_gpt41.pdf]
