# Supplementary material
Source: ML conference proceedings conference paper supplement (https://openreview.net/forum?id=smdbra3VEi)
Supplement: supplementary_material [file rr_acc_openbook_qa_mistral-7b_gpt41.pdf › Routing_SLM_LLMs/Uncertainty-based Routing/w_legend/to_gpt41/rr_acc_openbook_qa_mistral-7b_gpt41.pdf]

# OpenBookQA, mistral-7b to GPT-4.1 mini
