# Supplementary material
Source: ML conference proceedings conference paper supplement (https://openreview.net/forum?id=smdbra3VEi)
Supplement: supplementary_material [file rr_acc_social_i_qa_llama-3.1-8b_qwen32.pdf › Routing_SLM_LLMs/Uncertainty-based Routing/w_legend/to_qwen32/rr_acc_social_i_qa_llama-3.1-8b_qwen32.pdf]

## Social IQa, llama-3.1-8b to Qwen3-32B
