# Supplementary material
Source: ML conference proceedings conference paper supplement (https://openreview.net/forum?id=smdbra3VEi)

**Social IQa, qwen-2.5-7b to Llama-3.1-70B**

Accuracy

0.81  
0.80  
0.79  
0.78  
0.77  
0.76

0.00

0.25

0.50

0.75

1.00

Routing Ratio

- average-token-prob
- verbalization-1s
- verbalization-2s
- p(true)
- trained-probe
- perplexity
- jaccard-degree
- ood-probe

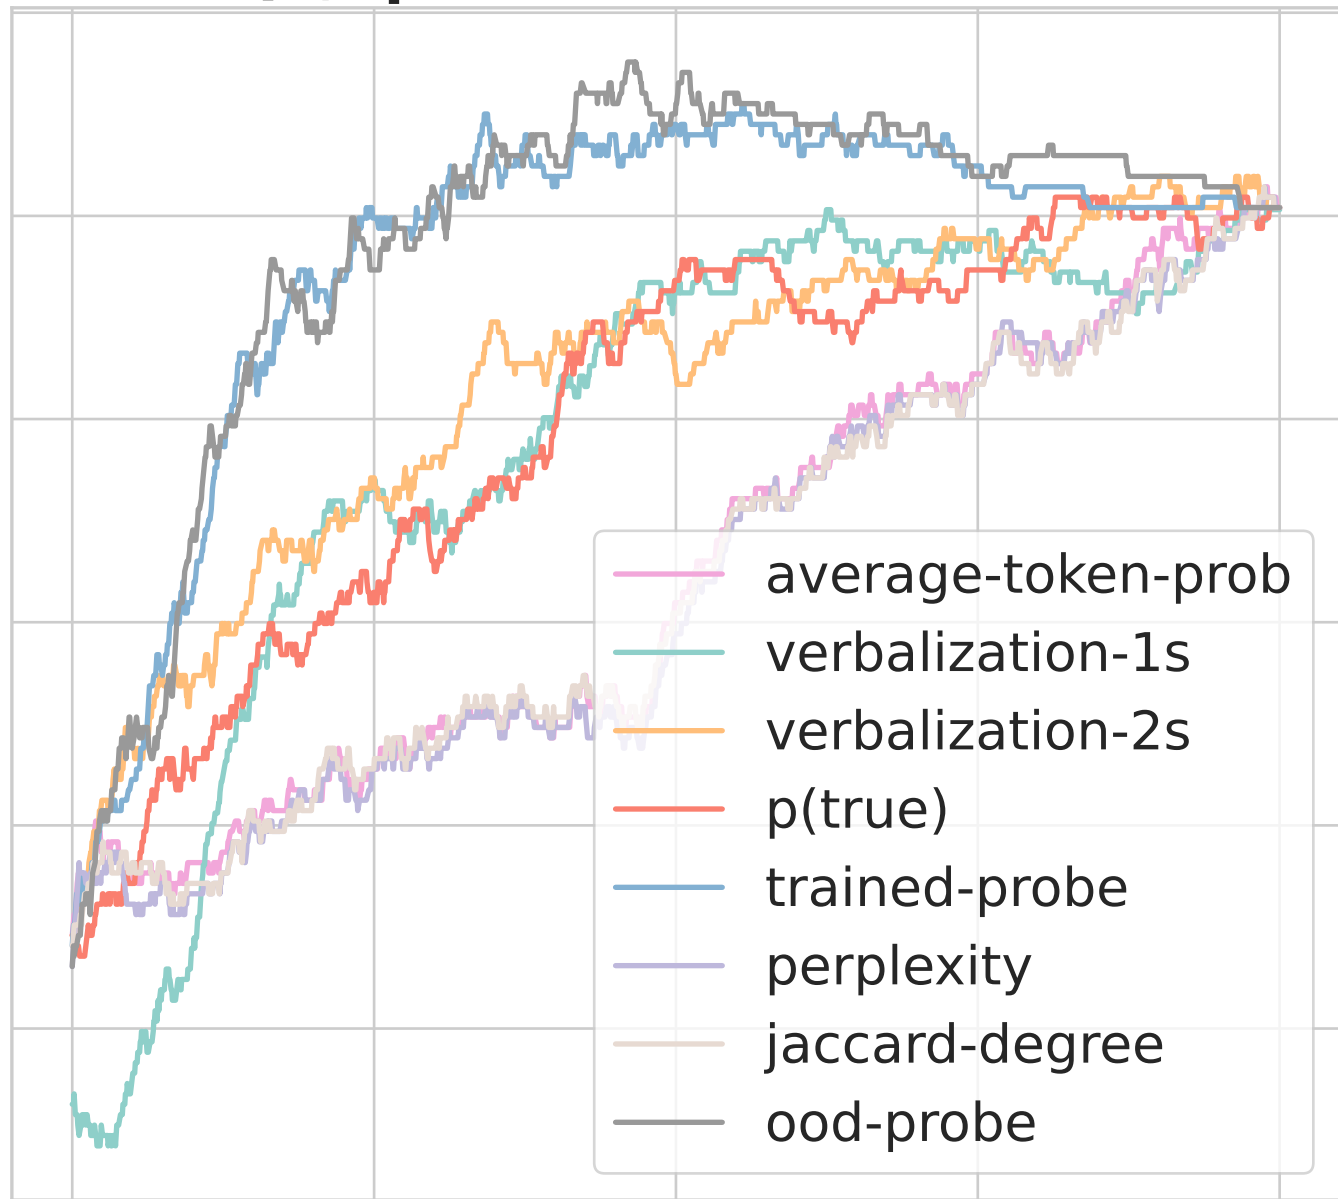

Supplement: supplementary_material [file rr_acc_social_i_qa_qwen-2.5-7b_llama70.pdf › Routing_SLM_LLMs/Uncertainty-based Routing/w_legend/to_llama70/rr_acc_social_i_qa_qwen-2.5-7b_llama70.pdf]
