# Supplementary material
Source: ML conference proceedings conference paper supplement (https://openreview.net/forum?id=smdbra3VEi)
Supplement: supplementary_material [file rr_acc_svamp_granite-3.1-8b_gpt41.pdf › Routing_SLM_LLMs/Uncertainty-based Routing/w_legend/to_gpt41/rr_acc_svamp_granite-3.1-8b_gpt41.pdf]

# SVAMP, granite-3.1-8b to GPT-4.1 mini

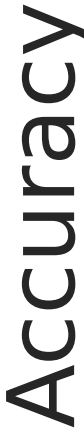

- average-token-prob
- verbalization-1s
- verbalization-2s
- $p(\text{true})$
- trained-probe
- perplexity
- jaccard-degree
- ood-probe
