# Supplementary material
Source: ML conference proceedings conference paper supplement (https://openreview.net/forum?id=smdbra3VEi)
Supplement: supplementary_material [file rr_acc_truthful_qa_llama-3.2-1b_qwen32.pdf › Routing_SLM_LLMs/Uncertainty-based Routing/w_legend/to_qwen32/rr_acc_truthful_qa_llama-3.2-1b_qwen32.pdf]

TruthfulQA, llama-3.2-1b to Qwen3-32B

Accuracy

0.7  
0.6  
0.5  
0.4  
0.3  
0.2

0.0

0.2

0.4

0.6

0.8

1.0

Routing Ratio

- average-token-prob
- verbalization-1s
- verbalization-2s
- p(true)
- trained-probe
- perplexity
- jaccard-degree
- ood-probe
