# Supplementary material
Source: ML conference proceedings conference paper supplement (https://openreview.net/forum?id=smdbra3VEi)
Supplement: supplementary_material [file rr_acc_winogrande_llama-3.2-1b_gpt41.pdf › Routing_SLM_LLMs/Uncertainty-based Routing/w_legend/to_gpt41/rr_acc_winogrande_llama-3.2-1b_gpt41.pdf]

# WinoGrande, llama-3.2-1b to GPT-4.1 mini

Accuracy

0.80  
0.75  
0.70  
0.65  
0.60  
0.55  
0.50

0.00

0.25

0.50

0.75

1.00

Routing Ratio

- average-token-prob
- verbalization-1s
- verbalization-2s
- p(true)
- trained-probe
- perplexity
- jaccard-degree
- ood-probe
