# Supplementary material
Source: ML conference proceedings conference paper supplement (https://openreview.net/forum?id=smdbra3VEi)

average-token-prob

verbalization-1s

verbalization-2s

p(true)

trained-probe

perplexity

jaccard-degree

ood-probe

Routing Ratio

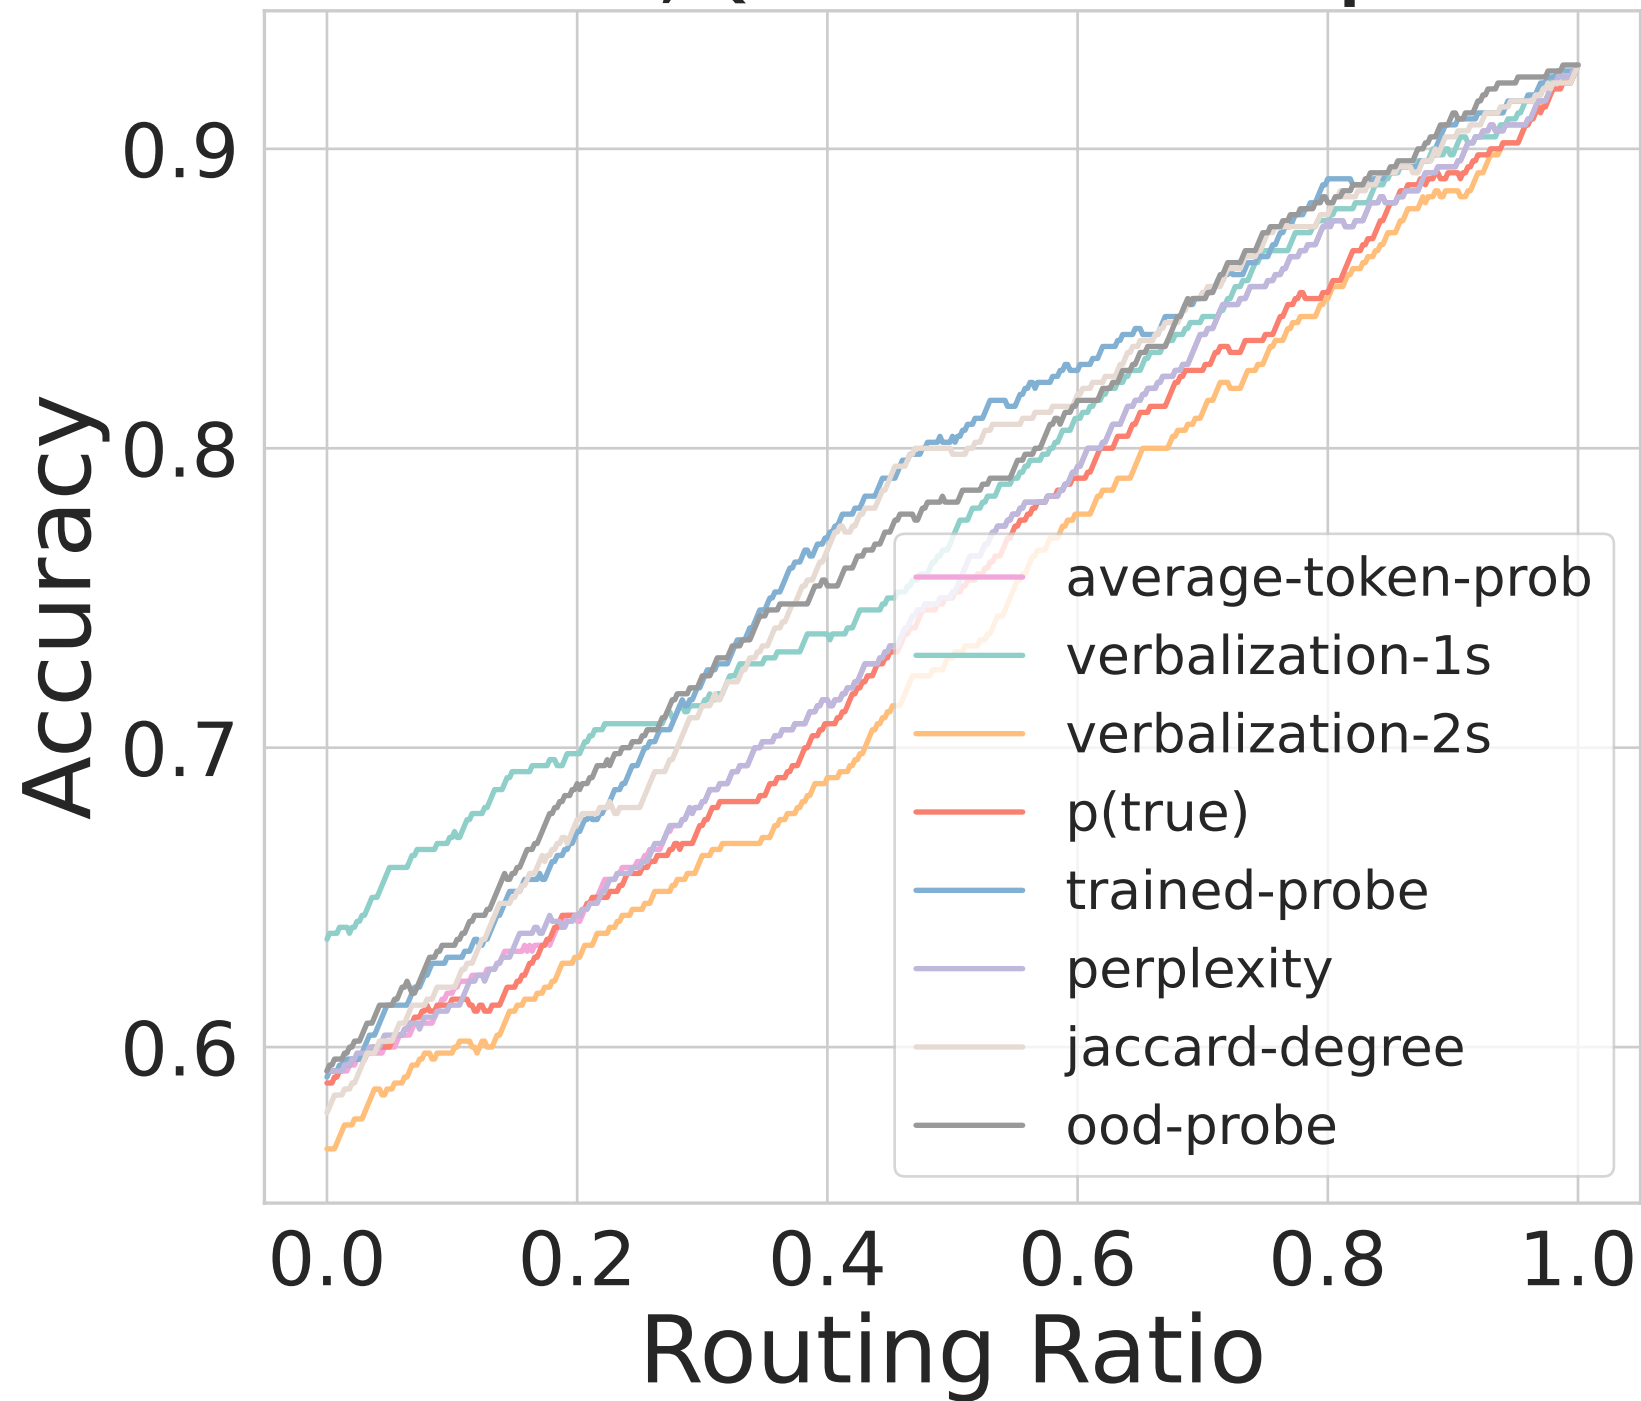

Supplement: supplementary_material [file rr_acc_winogrande_Qwen3-1.7B_dsR1.pdf › Routing_SLM_LLMs/Uncertainty-based Routing/w_legend/to_dsR1/rr_acc_winogrande_Qwen3-1.7B_dsR1.pdf]
