# Supplementary material (part 1 of 14)
Source: ML conference proceedings conference paper supplement (https://openreview.net/forum?id=smdbra3VEi)

**AQuA, Qwen3-0.6B to Qwen3-32B**

Accuracy

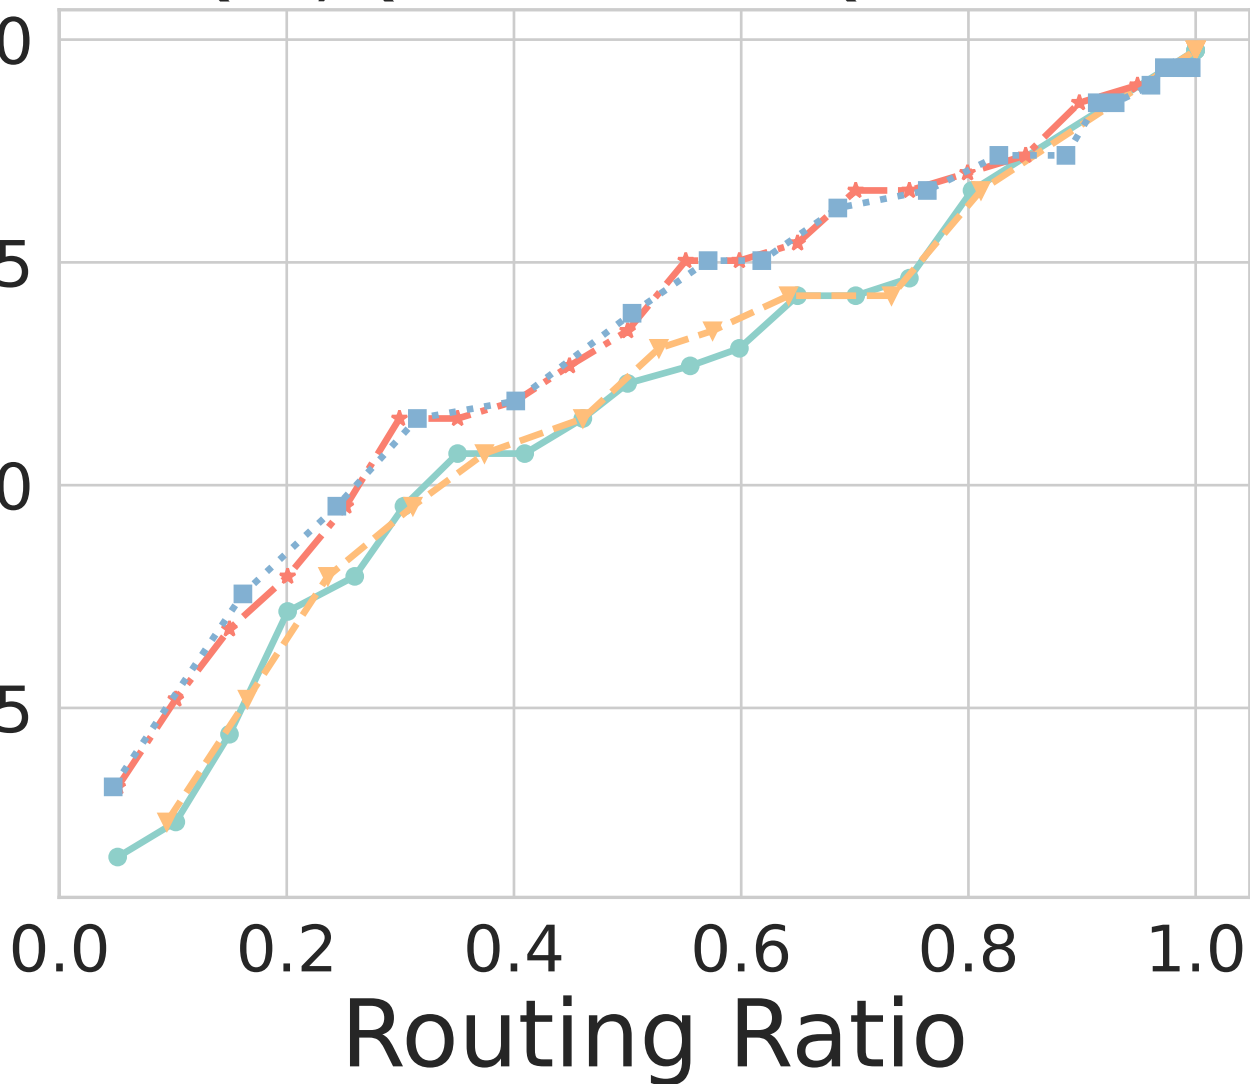

Supplement: supplementary_material [file cali_down_aqua_Qwen3-0.6B_Qwen_Qwen3-32B.pdf › Routing_SLM_LLMs/Proxy_routing_prediction/to_Qwen_Qwen3-32B/aqua_as_downstream/cali_down_aqua_Qwen3-0.6B_Qwen_Qwen3-32B.pdf]

**AQuA, Qwen3-1.7B to Qwen3-32B**

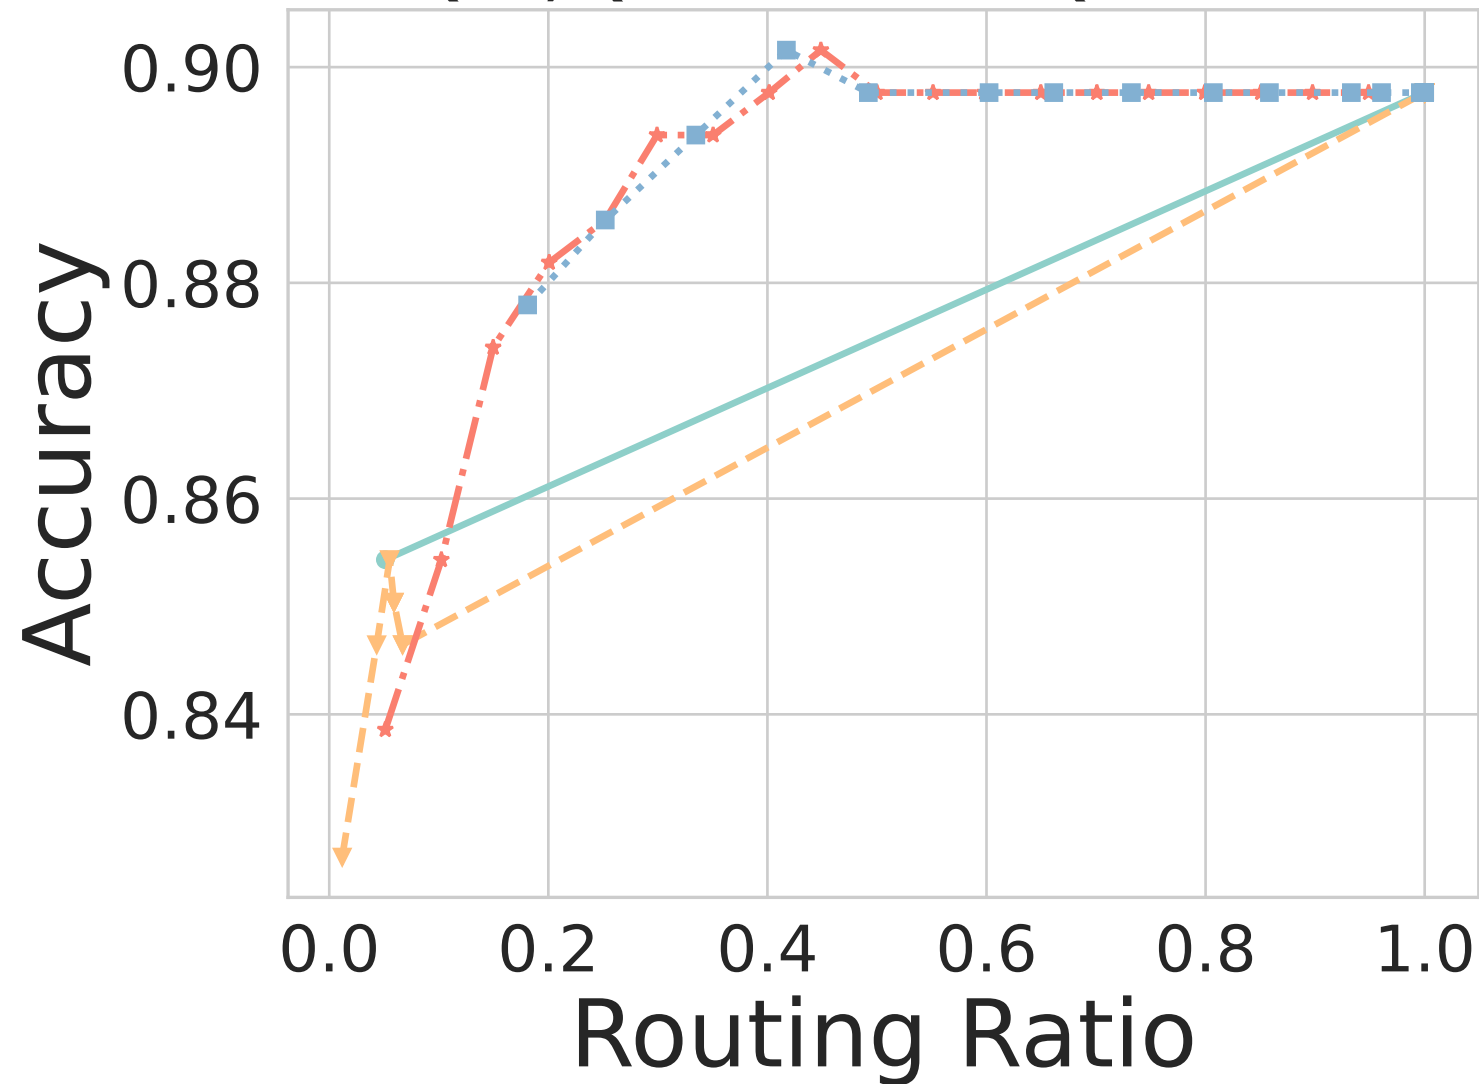

Supplement: supplementary_material [file cali_down_aqua_Qwen3-1.7B_Qwen_Qwen3-32B.pdf › Routing_SLM_LLMs/Proxy_routing_prediction/to_Qwen_Qwen3-32B/aqua_as_downstream/cali_down_aqua_Qwen3-1.7B_Qwen_Qwen3-32B.pdf]

AQuA, Qwen3-4B to Qwen3-32B

Accuracy

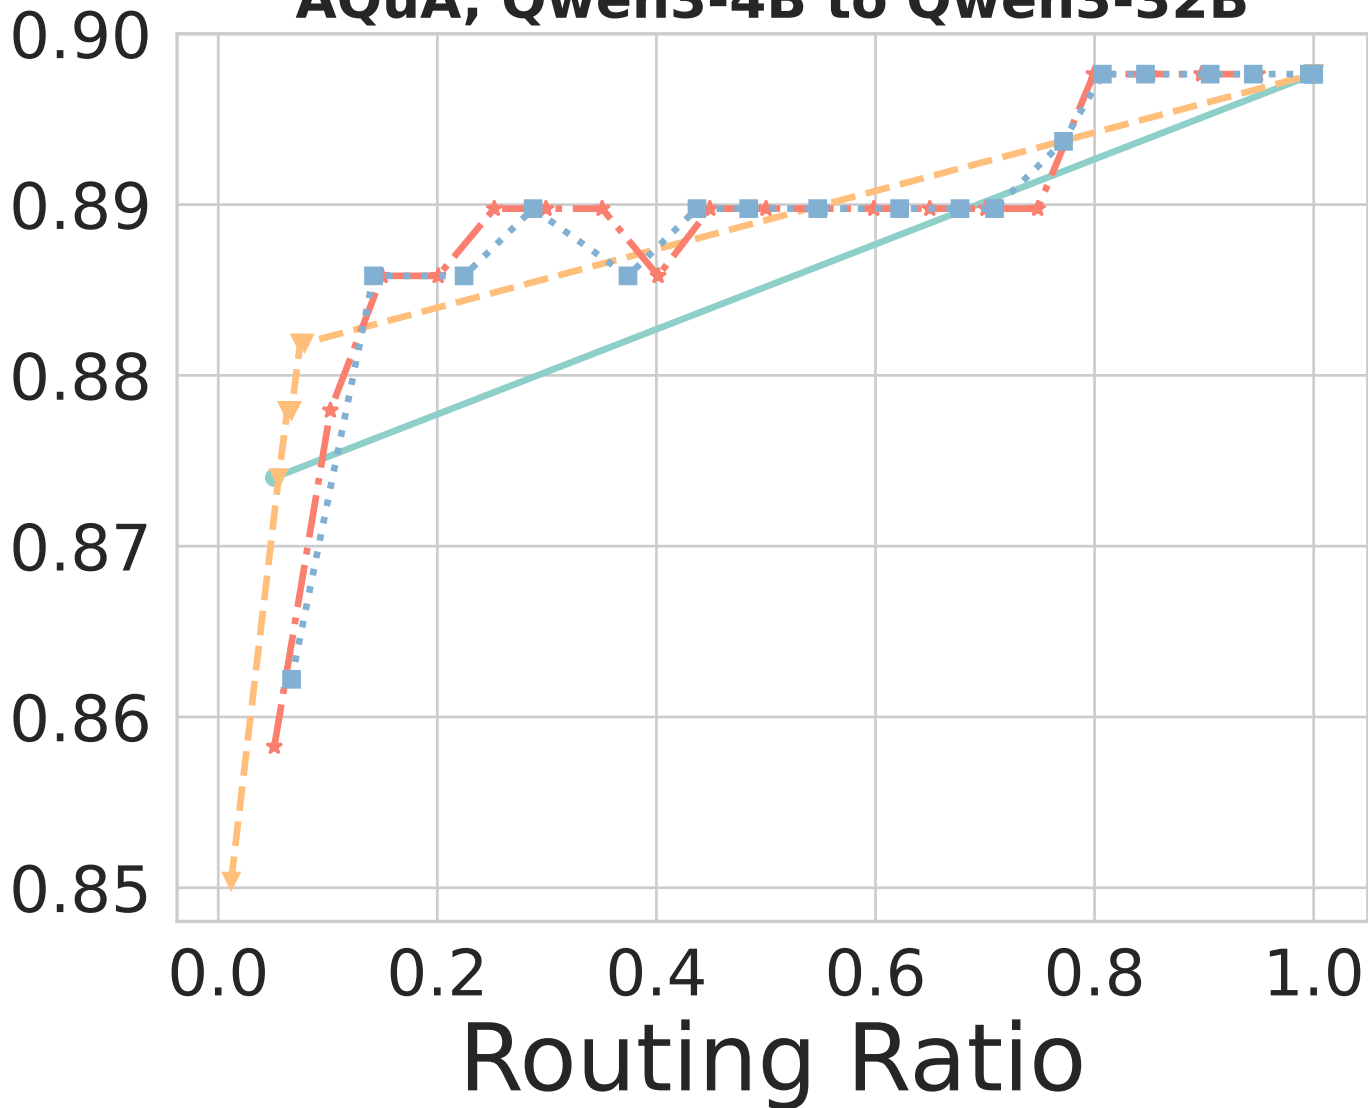

Supplement: supplementary_material [file cali_down_aqua_Qwen3-4B_Qwen_Qwen3-32B.pdf › Routing_SLM_LLMs/Proxy_routing_prediction/to_Qwen_Qwen3-32B/aqua_as_downstream/cali_down_aqua_Qwen3-4B_Qwen_Qwen3-32B.pdf]

**AQuA, granite-3.1-8b to Qwen3-32B**

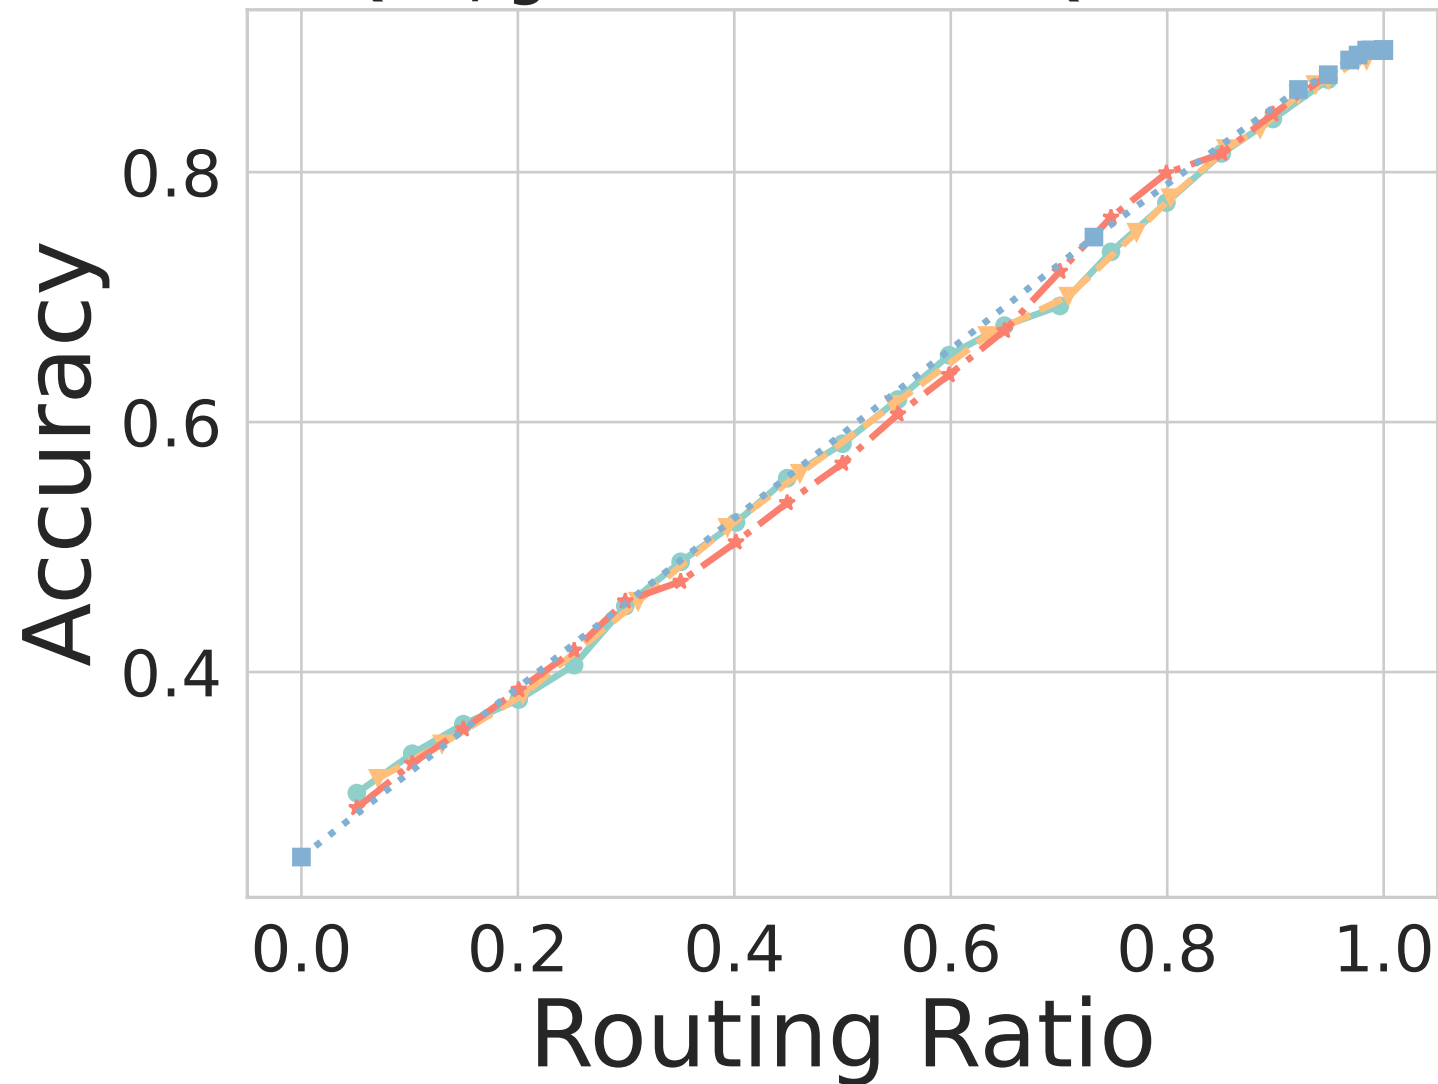

Supplement: supplementary_material [file cali_down_aqua_granite-3.1-8b_Qwen_Qwen3-32B.pdf › Routing_SLM_LLMs/Proxy_routing_prediction/to_Qwen_Qwen3-32B/aqua_as_downstream/cali_down_aqua_granite-3.1-8b_Qwen_Qwen3-32B.pdf]

**AQuA, llama-3.1-8b to Qwen3-32B**

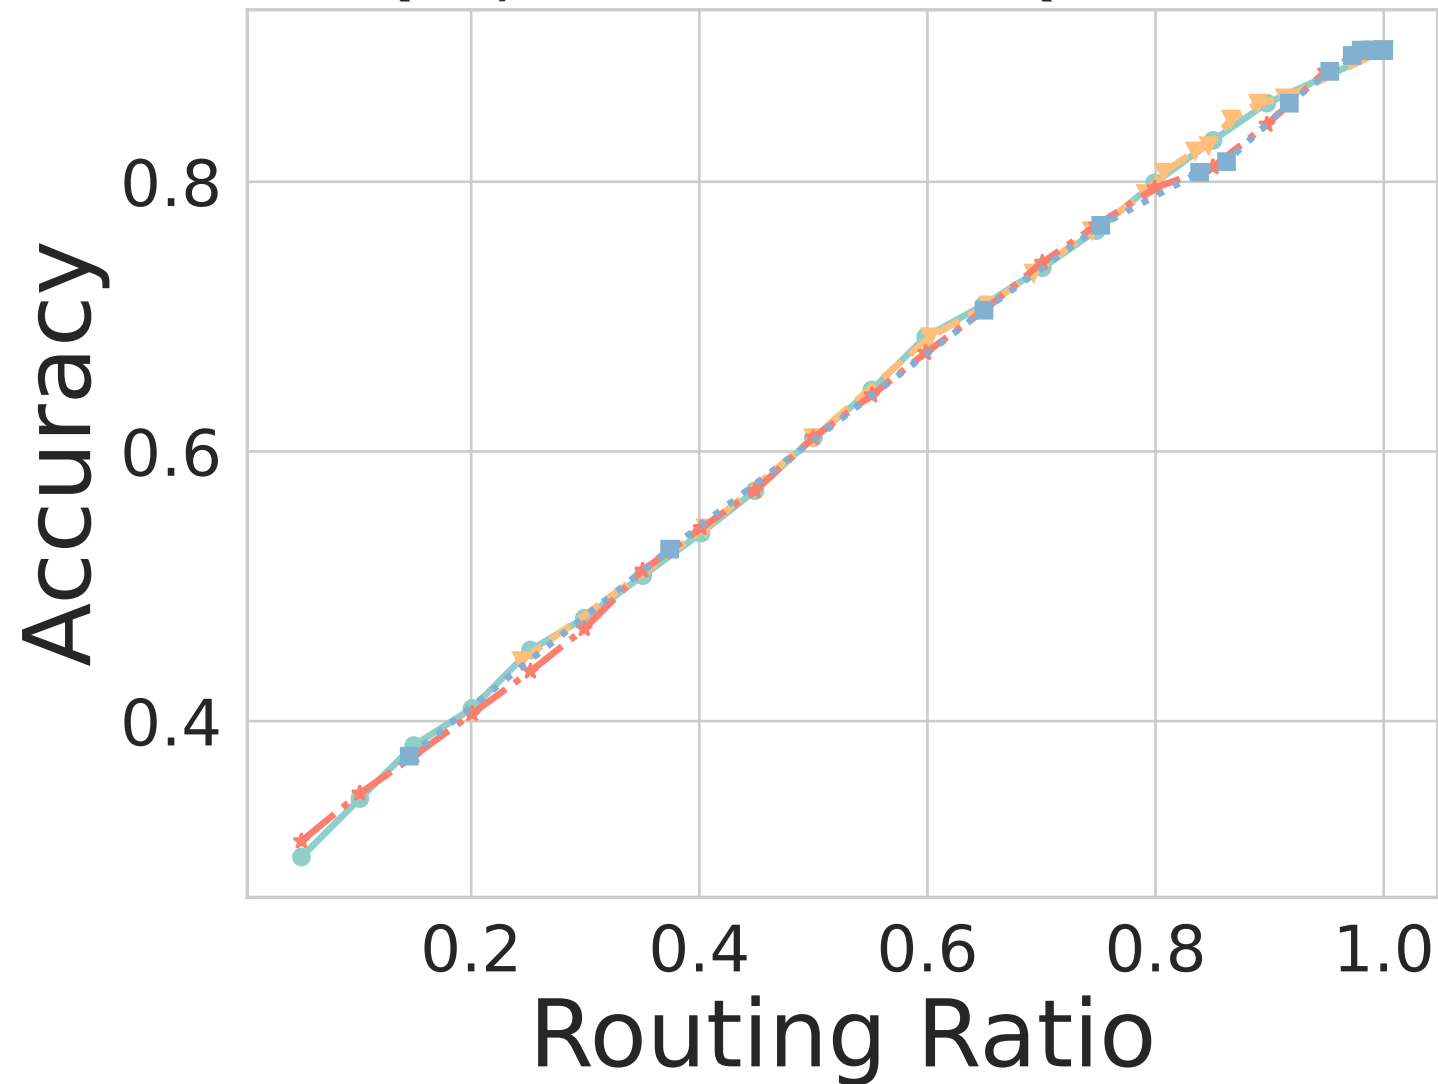

Supplement: supplementary_material [file cali_down_aqua_llama-3.1-8b_Qwen_Qwen3-32B.pdf › Routing_SLM_LLMs/Proxy_routing_prediction/to_Qwen_Qwen3-32B/aqua_as_downstream/cali_down_aqua_llama-3.1-8b_Qwen_Qwen3-32B.pdf]

**AQuA, llama-3.2-1b to Qwen3-32B**

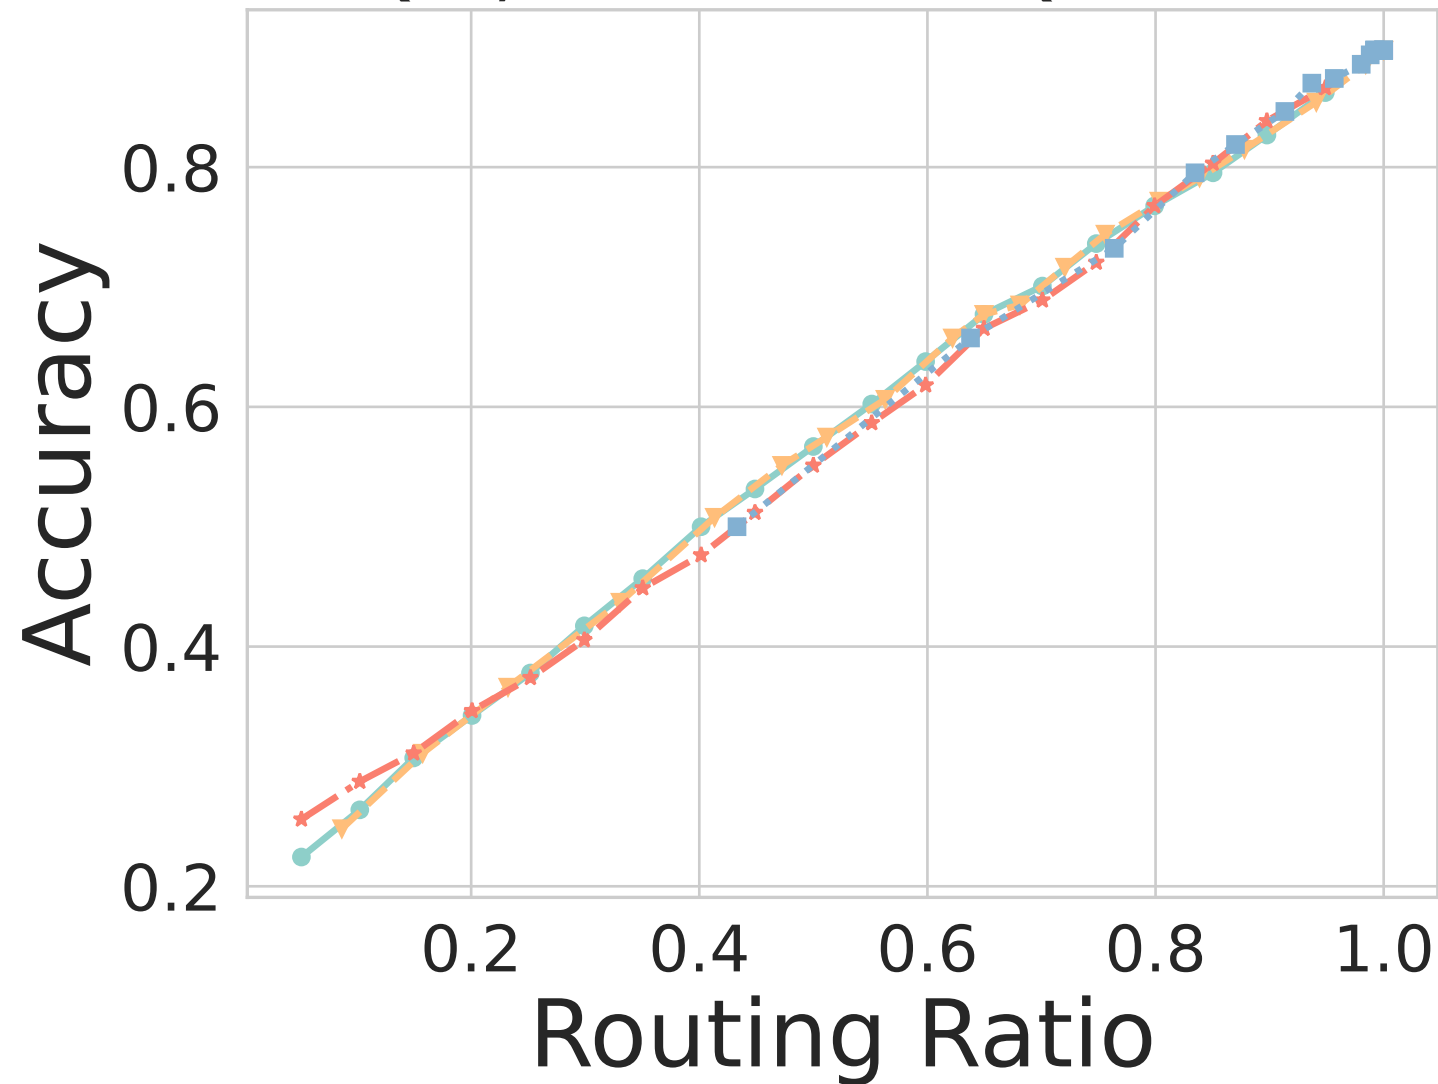

Supplement: supplementary_material [file cali_down_aqua_llama-3.2-1b_Qwen_Qwen3-32B.pdf › Routing_SLM_LLMs/Proxy_routing_prediction/to_Qwen_Qwen3-32B/aqua_as_downstream/cali_down_aqua_llama-3.2-1b_Qwen_Qwen3-32B.pdf]

**AQuA, llama-3.2-3b to Qwen3-32B**

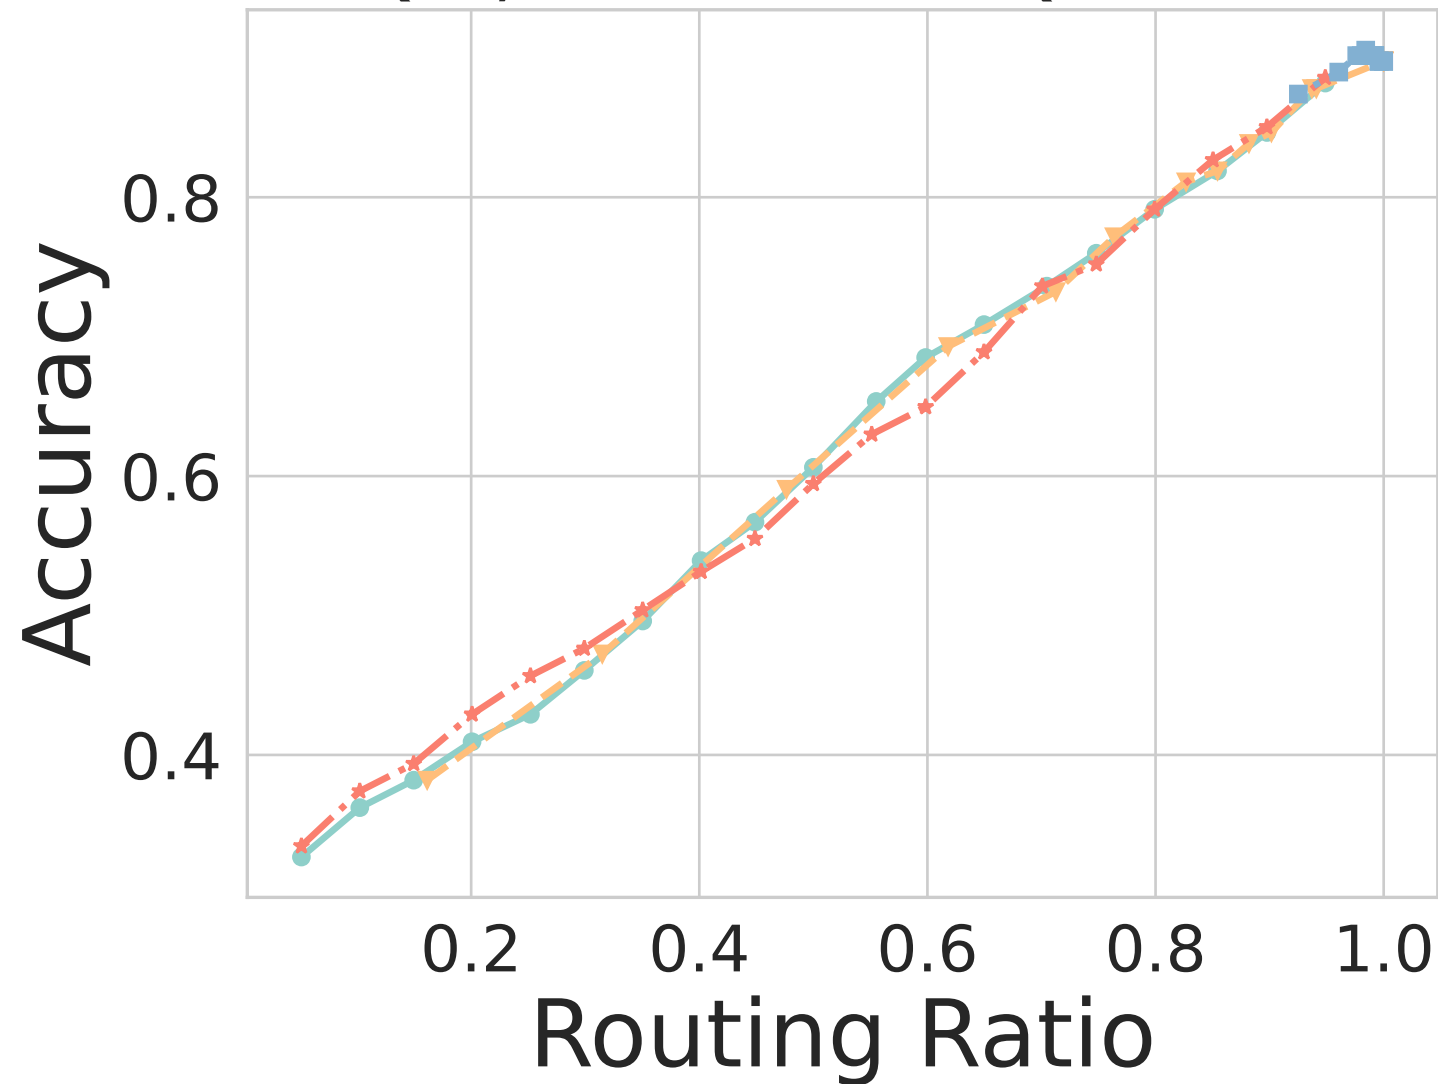

Supplement: supplementary_material [file cali_down_aqua_llama-3.2-3b_Qwen_Qwen3-32B.pdf › Routing_SLM_LLMs/Proxy_routing_prediction/to_Qwen_Qwen3-32B/aqua_as_downstream/cali_down_aqua_llama-3.2-3b_Qwen_Qwen3-32B.pdf]

**AQuA, mistral-7b to Qwen3-32B**

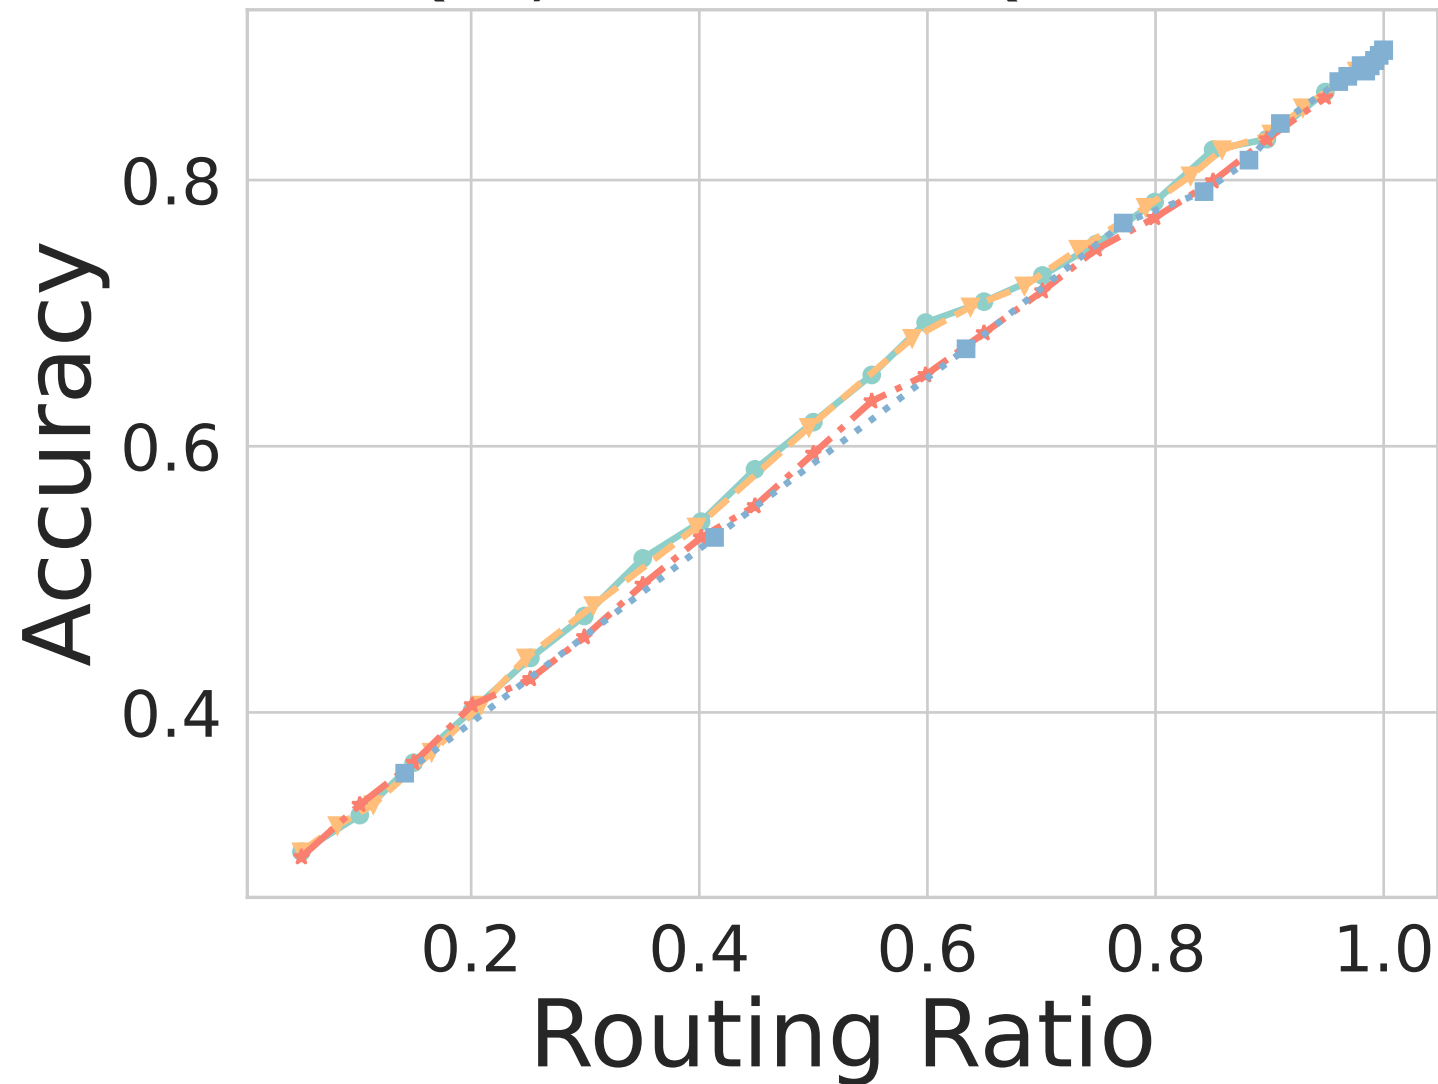

Supplement: supplementary_material [file cali_down_aqua_mistral-7b_Qwen_Qwen3-32B.pdf › Routing_SLM_LLMs/Proxy_routing_prediction/to_Qwen_Qwen3-32B/aqua_as_downstream/cali_down_aqua_mistral-7b_Qwen_Qwen3-32B.pdf]

**AQuA, phi-3.5-mini to Qwen3-32B**

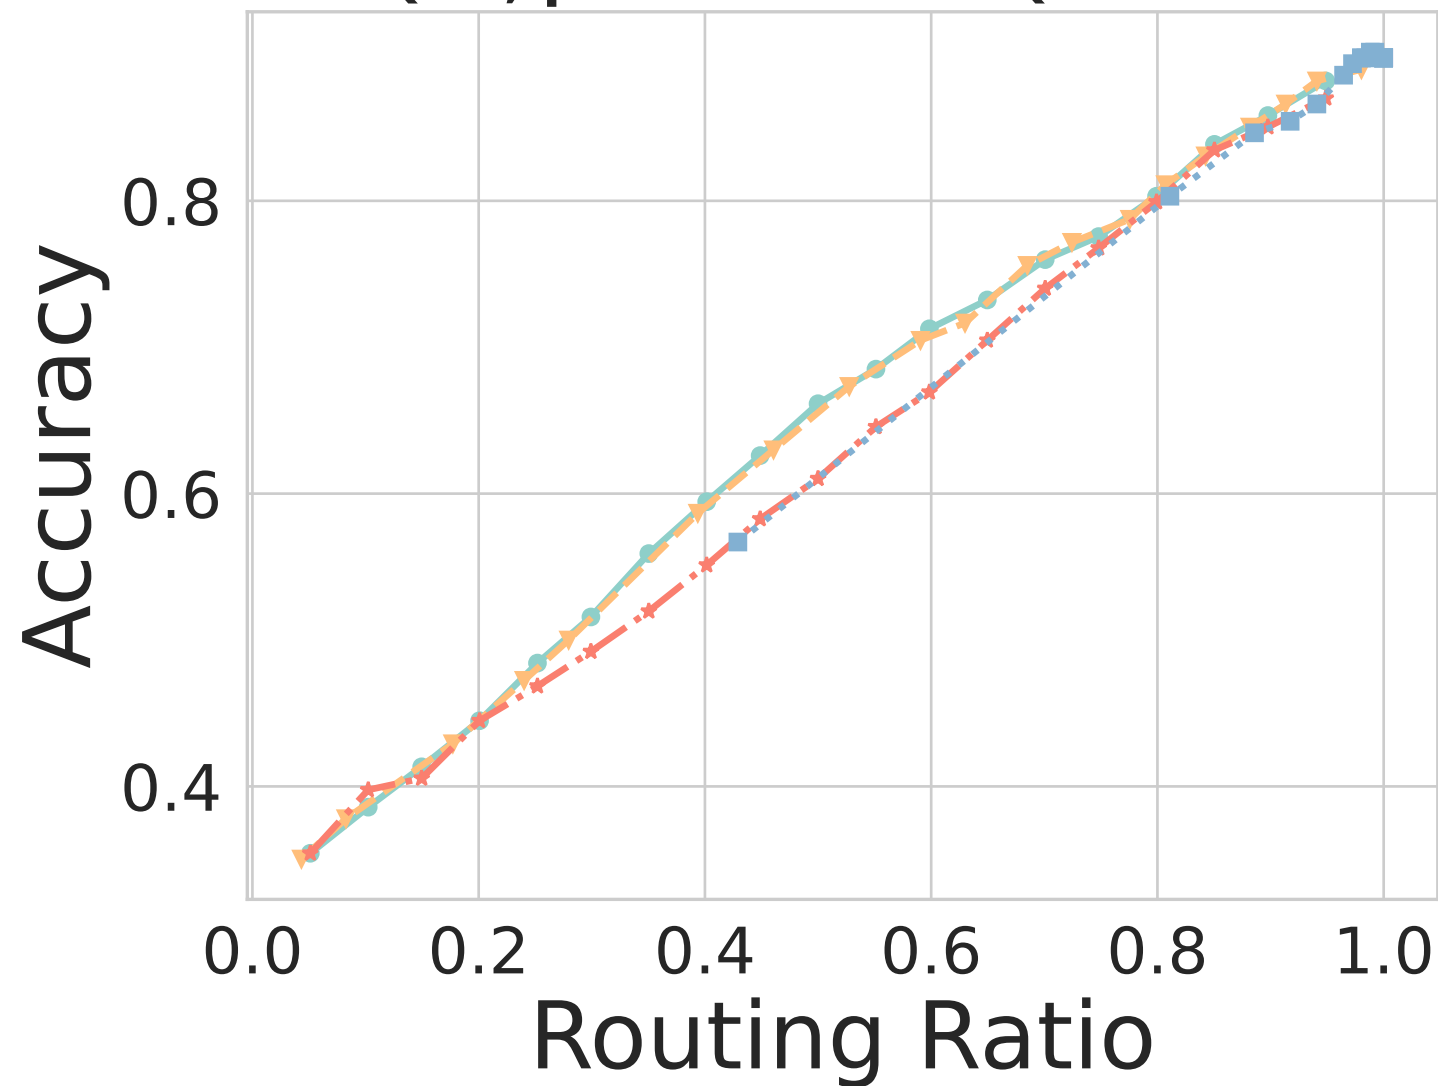

Supplement: supplementary_material [file cali_down_aqua_phi-3.5-mini_Qwen_Qwen3-32B.pdf › Routing_SLM_LLMs/Proxy_routing_prediction/to_Qwen_Qwen3-32B/aqua_as_downstream/cali_down_aqua_phi-3.5-mini_Qwen_Qwen3-32B.pdf]

**AQuA, phi-4-mini-reasoning to Qwen3-32B**

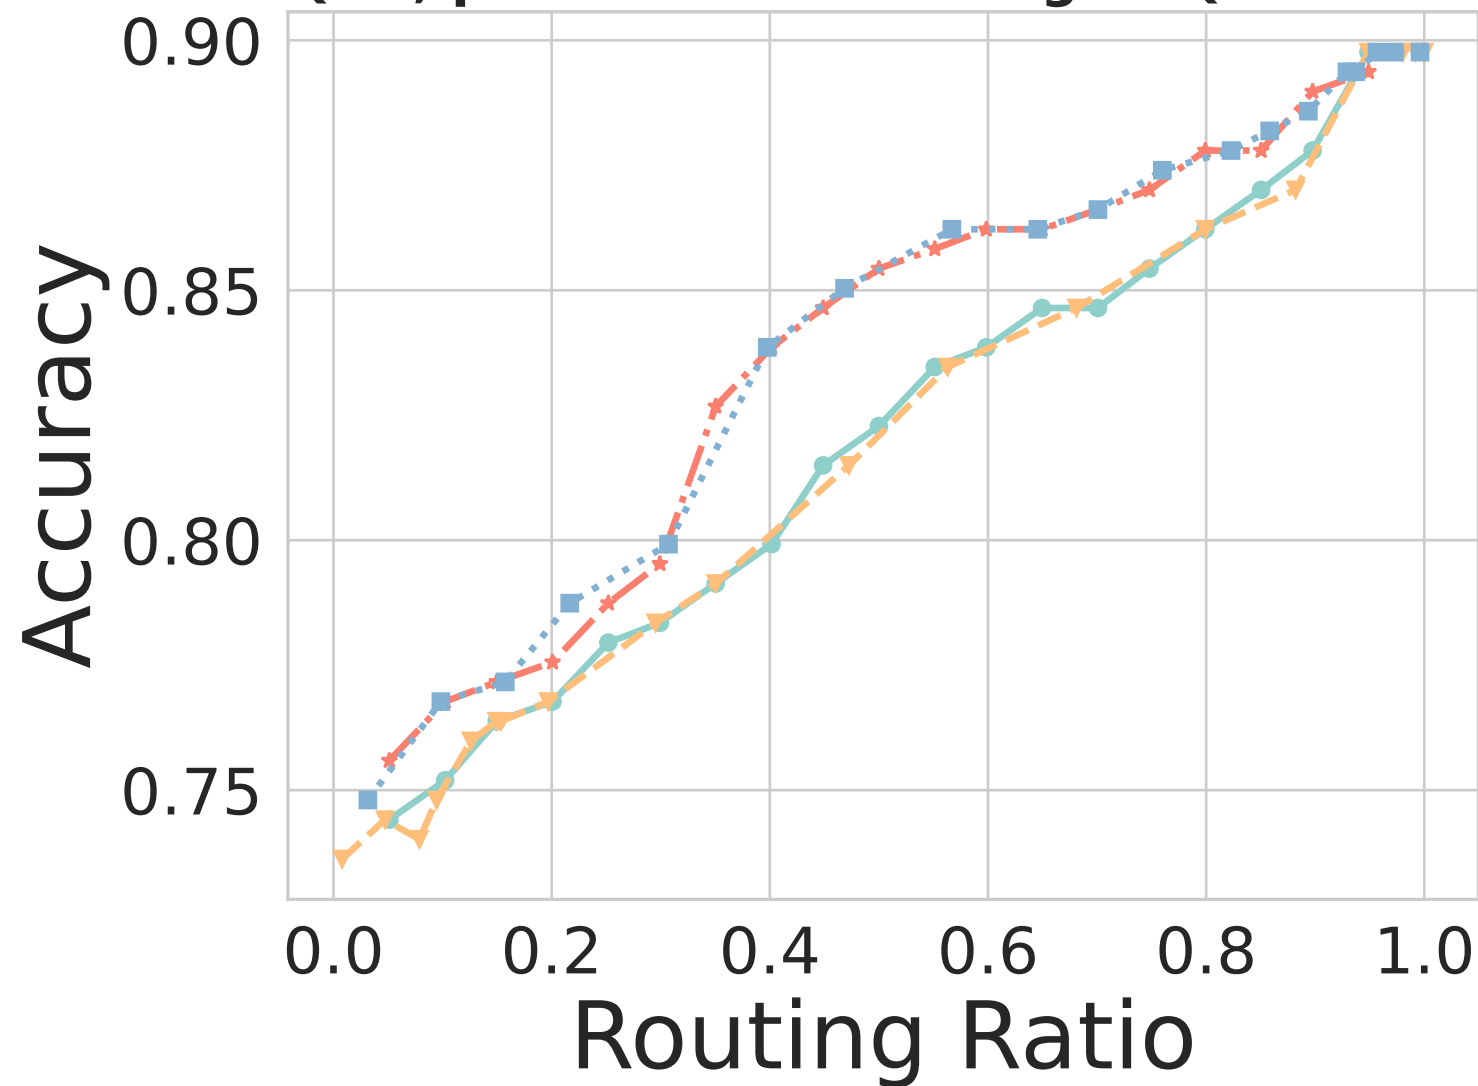

Supplement: supplementary_material [file cali_down_aqua_phi-4-mini-reasoning_Qwen_Qwen3-32B.pdf › Routing_SLM_LLMs/Proxy_routing_prediction/to_Qwen_Qwen3-32B/aqua_as_downstream/cali_down_aqua_phi-4-mini-reasoning_Qwen_Qwen3-32B.pdf]

**AQuA, qwen-2.5-7b to Qwen3-32B**

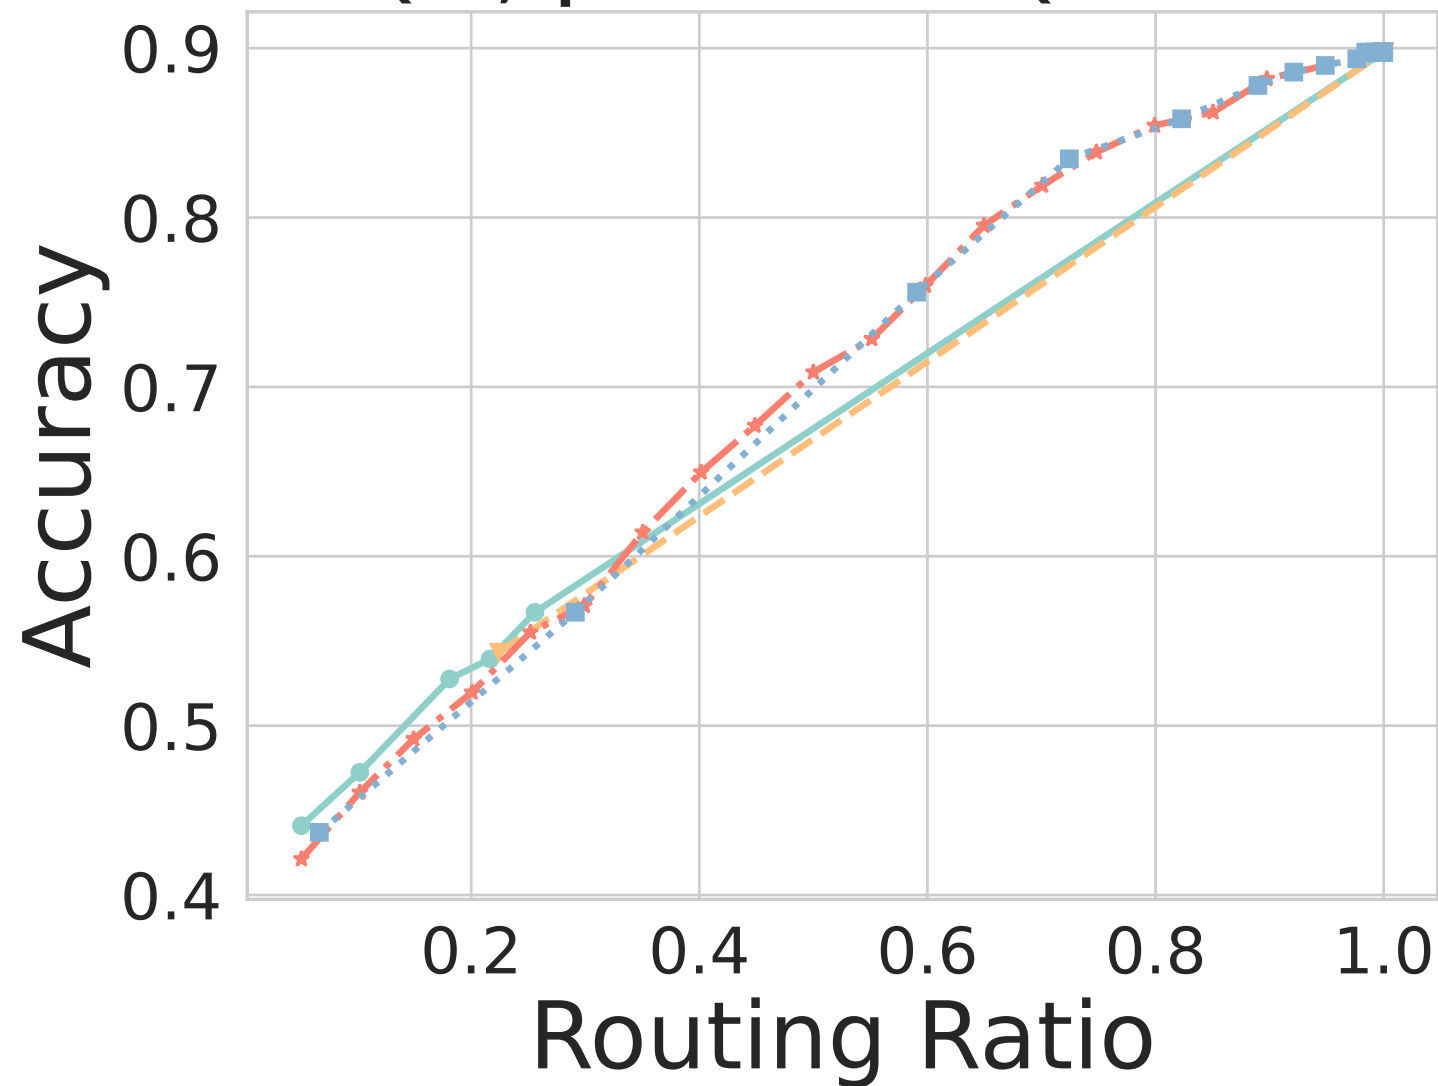

Supplement: supplementary_material [file cali_down_aqua_qwen-2.5-7b_Qwen_Qwen3-32B.pdf › Routing_SLM_LLMs/Proxy_routing_prediction/to_Qwen_Qwen3-32B/aqua_as_downstream/cali_down_aqua_qwen-2.5-7b_Qwen_Qwen3-32B.pdf]

**AQuA, rwkv to Qwen3-32B**

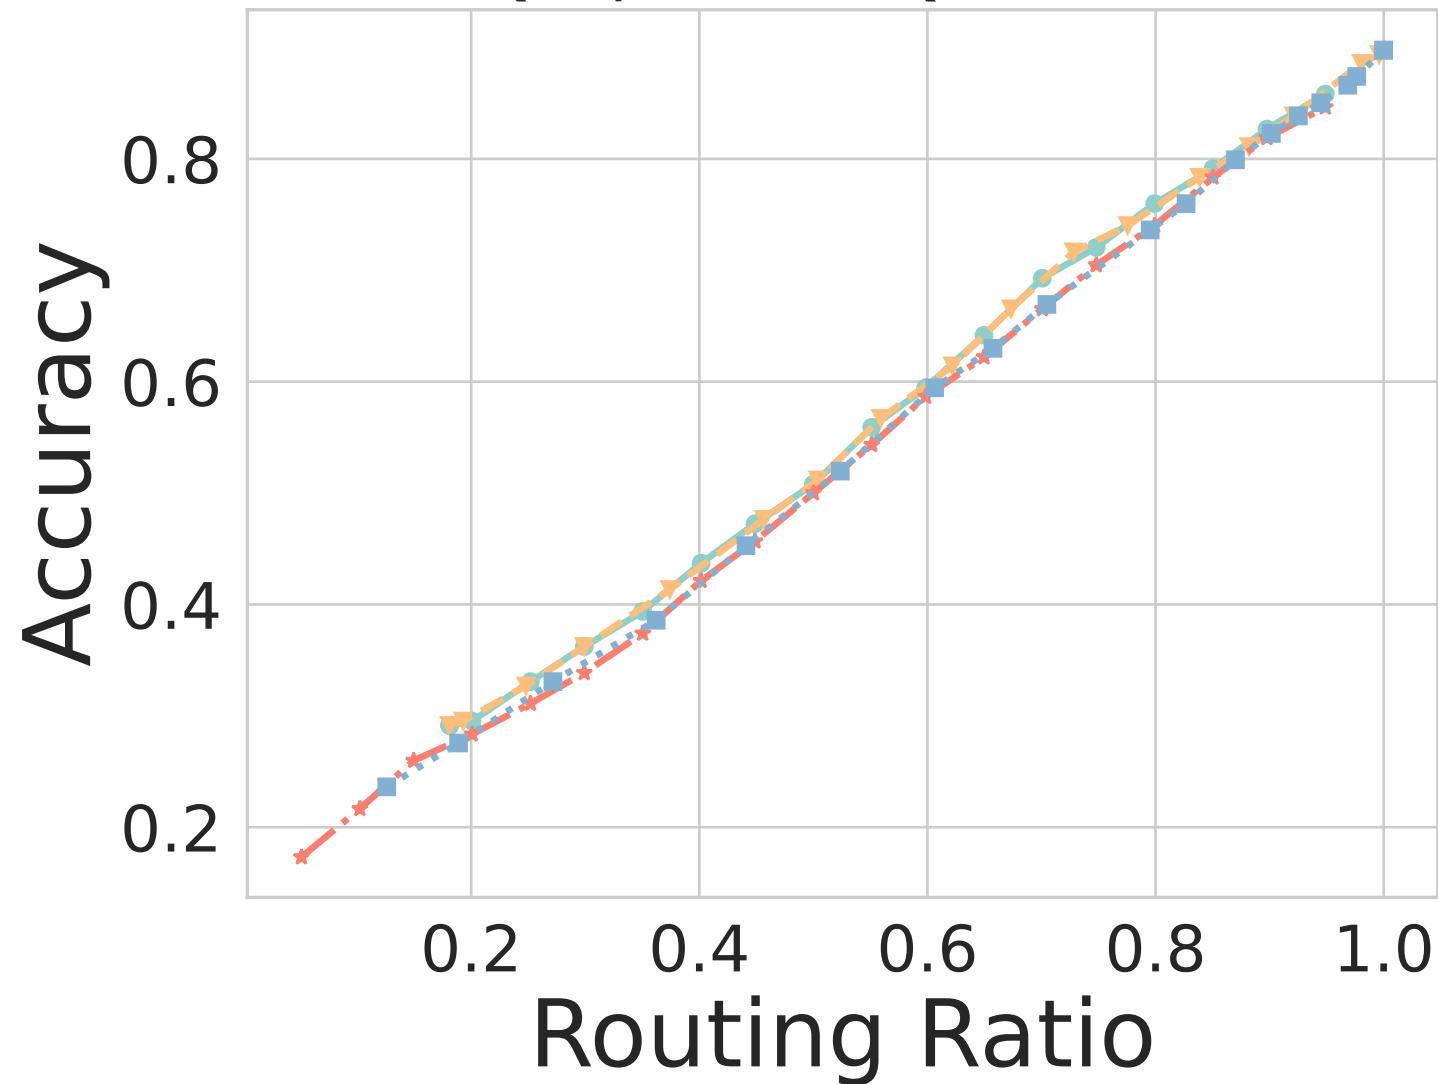

Supplement: supplementary_material [file cali_down_aqua_rwkv_Qwen_Qwen3-32B.pdf › Routing_SLM_LLMs/Proxy_routing_prediction/to_Qwen_Qwen3-32B/aqua_as_downstream/cali_down_aqua_rwkv_Qwen_Qwen3-32B.pdf]

**BoolQ, Qwen3-0.6B to Qwen3-32B**

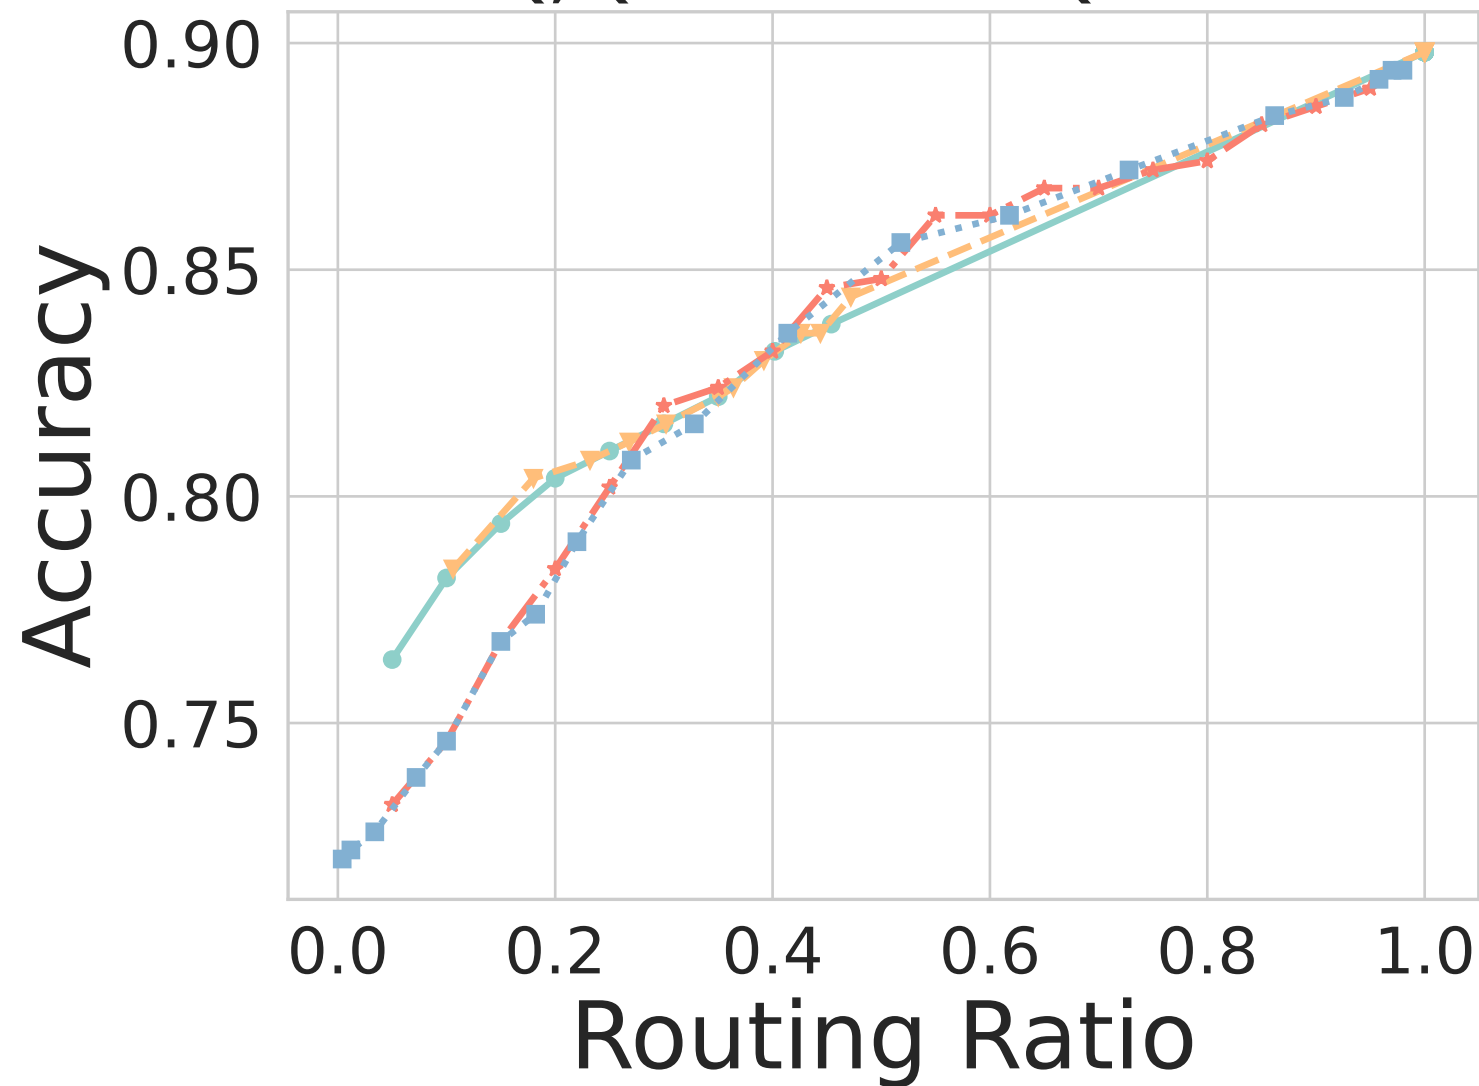

Supplement: supplementary_material [file cali_down_boolq_Qwen3-0.6B_Qwen_Qwen3-32B.pdf › Routing_SLM_LLMs/Proxy_routing_prediction/to_Qwen_Qwen3-32B/boolq_as_downstream/cali_down_boolq_Qwen3-0.6B_Qwen_Qwen3-32B.pdf]

**BoolQ, Qwen3-1.7B to Qwen3-32B**

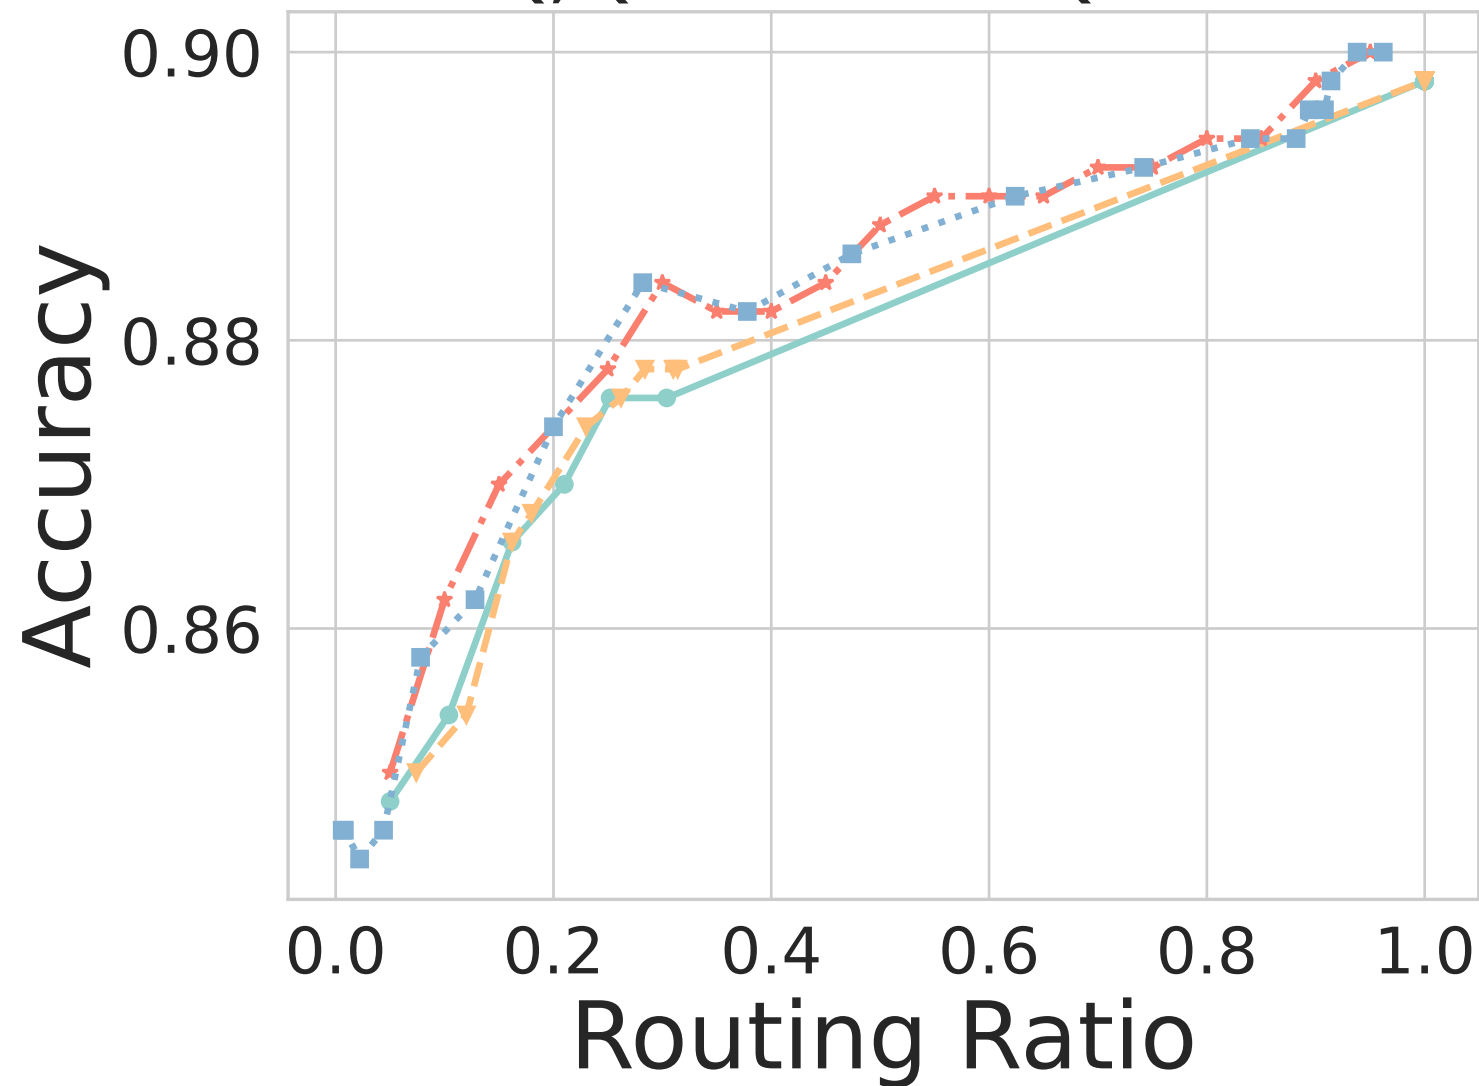

Supplement: supplementary_material [file cali_down_boolq_Qwen3-1.7B_Qwen_Qwen3-32B.pdf › Routing_SLM_LLMs/Proxy_routing_prediction/to_Qwen_Qwen3-32B/boolq_as_downstream/cali_down_boolq_Qwen3-1.7B_Qwen_Qwen3-32B.pdf]

**BoolQ, Qwen3-4B to Qwen3-32B**

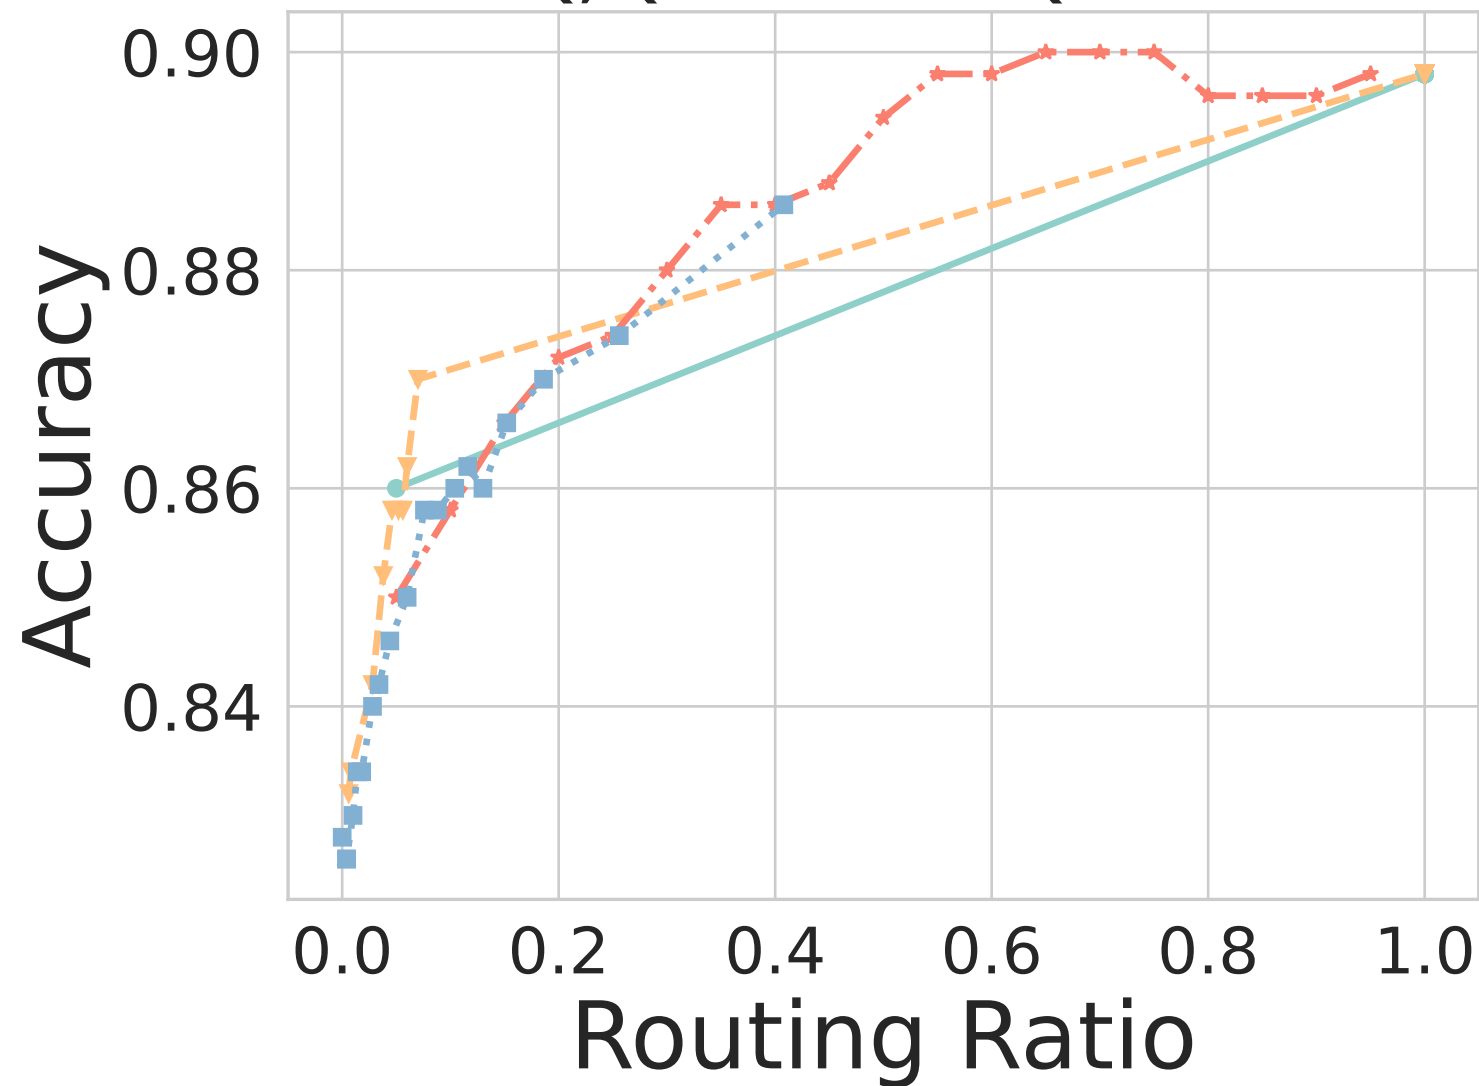

Supplement: supplementary_material [file cali_down_boolq_Qwen3-4B_Qwen_Qwen3-32B.pdf › Routing_SLM_LLMs/Proxy_routing_prediction/to_Qwen_Qwen3-32B/boolq_as_downstream/cali_down_boolq_Qwen3-4B_Qwen_Qwen3-32B.pdf]

**BoolQ, granite-3.1-8b to Qwen3-32B**

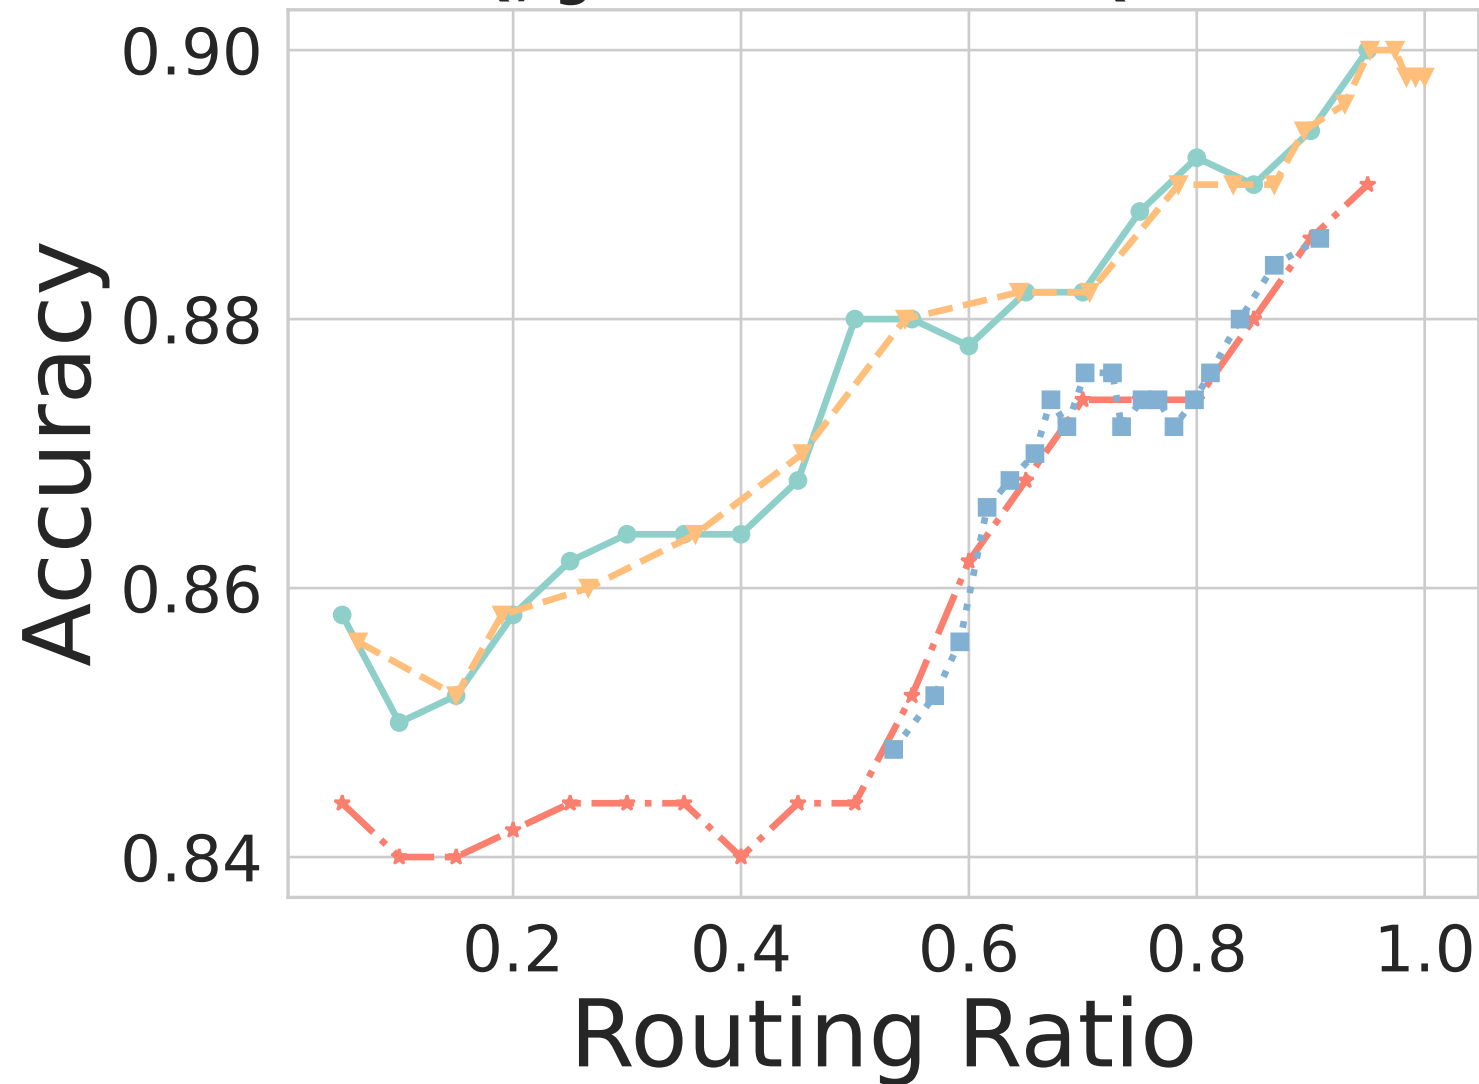

Supplement: supplementary_material [file cali_down_boolq_granite-3.1-8b_Qwen_Qwen3-32B.pdf › Routing_SLM_LLMs/Proxy_routing_prediction/to_Qwen_Qwen3-32B/boolq_as_downstream/cali_down_boolq_granite-3.1-8b_Qwen_Qwen3-32B.pdf]

**BoolQ, llama-3.1-8b to Qwen3-32B**

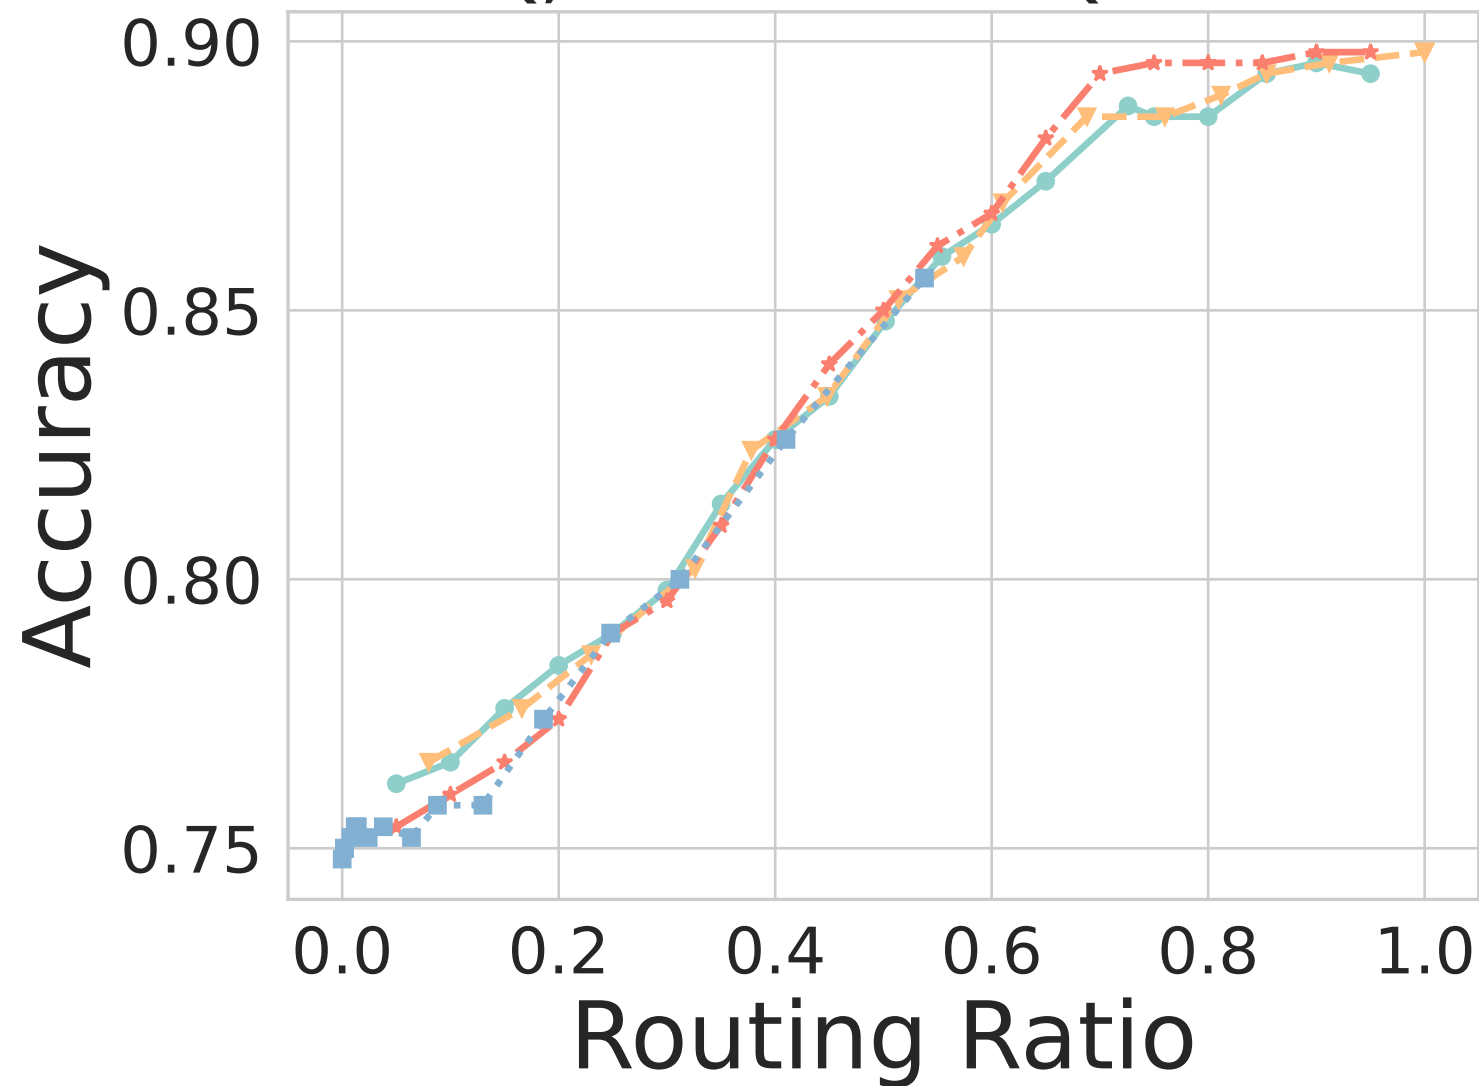

Supplement: supplementary_material [file cali_down_boolq_llama-3.1-8b_Qwen_Qwen3-32B.pdf › Routing_SLM_LLMs/Proxy_routing_prediction/to_Qwen_Qwen3-32B/boolq_as_downstream/cali_down_boolq_llama-3.1-8b_Qwen_Qwen3-32B.pdf]

**BoolQ, llama-3.2-1b to Qwen3-32B**

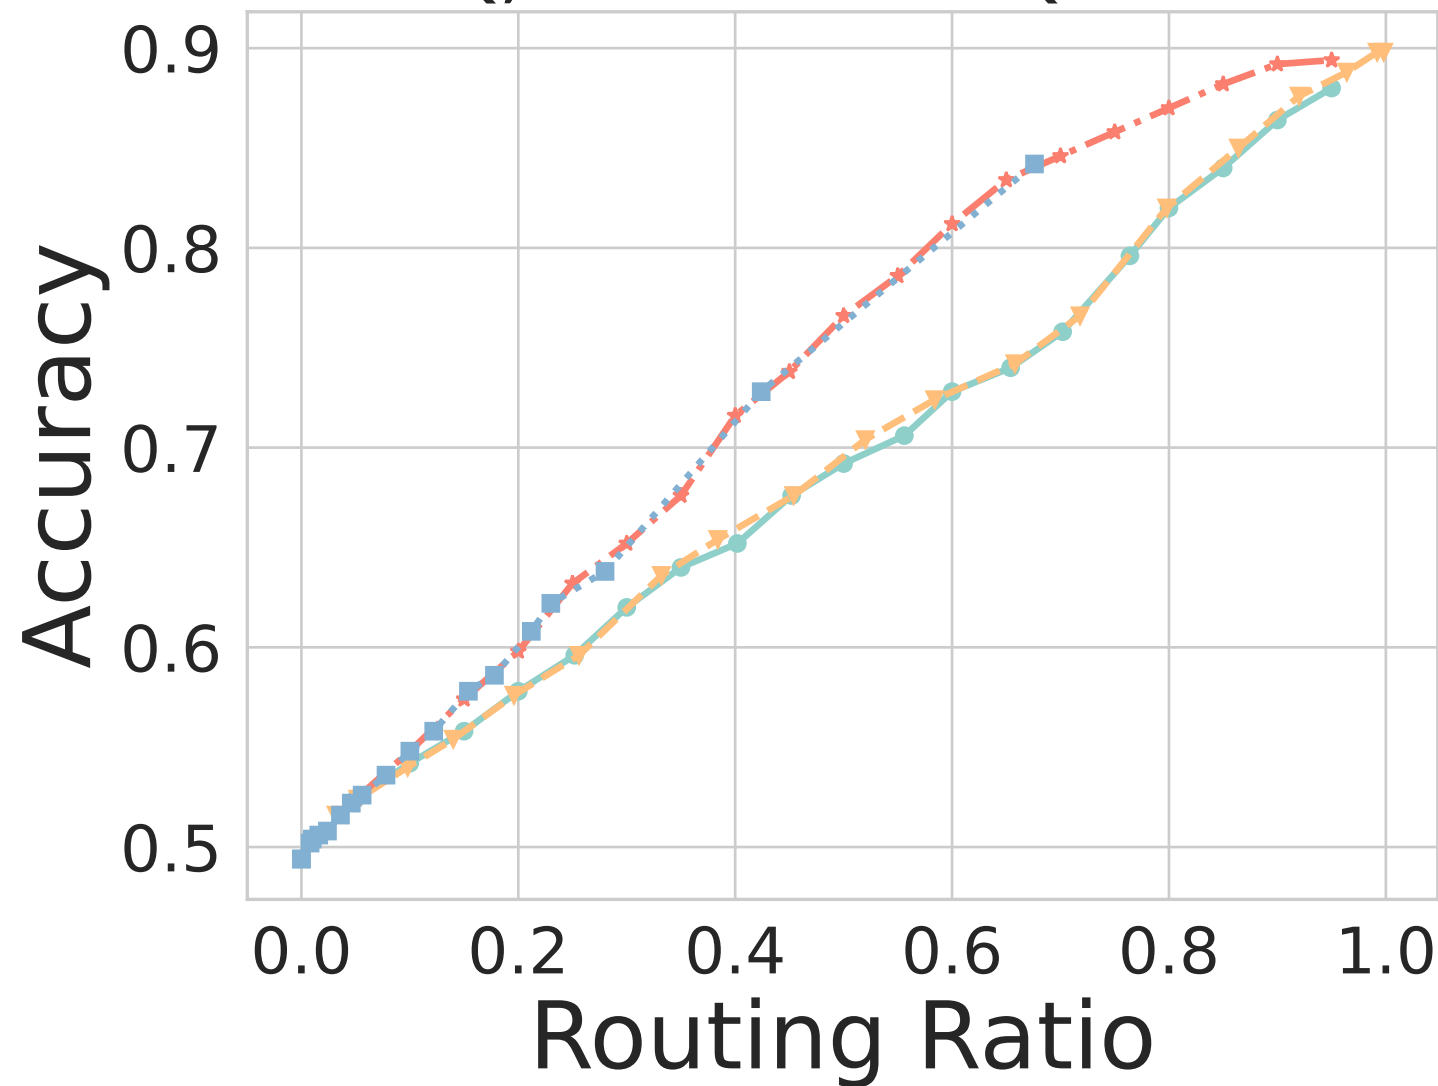

Supplement: supplementary_material [file cali_down_boolq_llama-3.2-1b_Qwen_Qwen3-32B.pdf › Routing_SLM_LLMs/Proxy_routing_prediction/to_Qwen_Qwen3-32B/boolq_as_downstream/cali_down_boolq_llama-3.2-1b_Qwen_Qwen3-32B.pdf]

**BoolQ, llama-3.2-3b to Qwen3-32B**

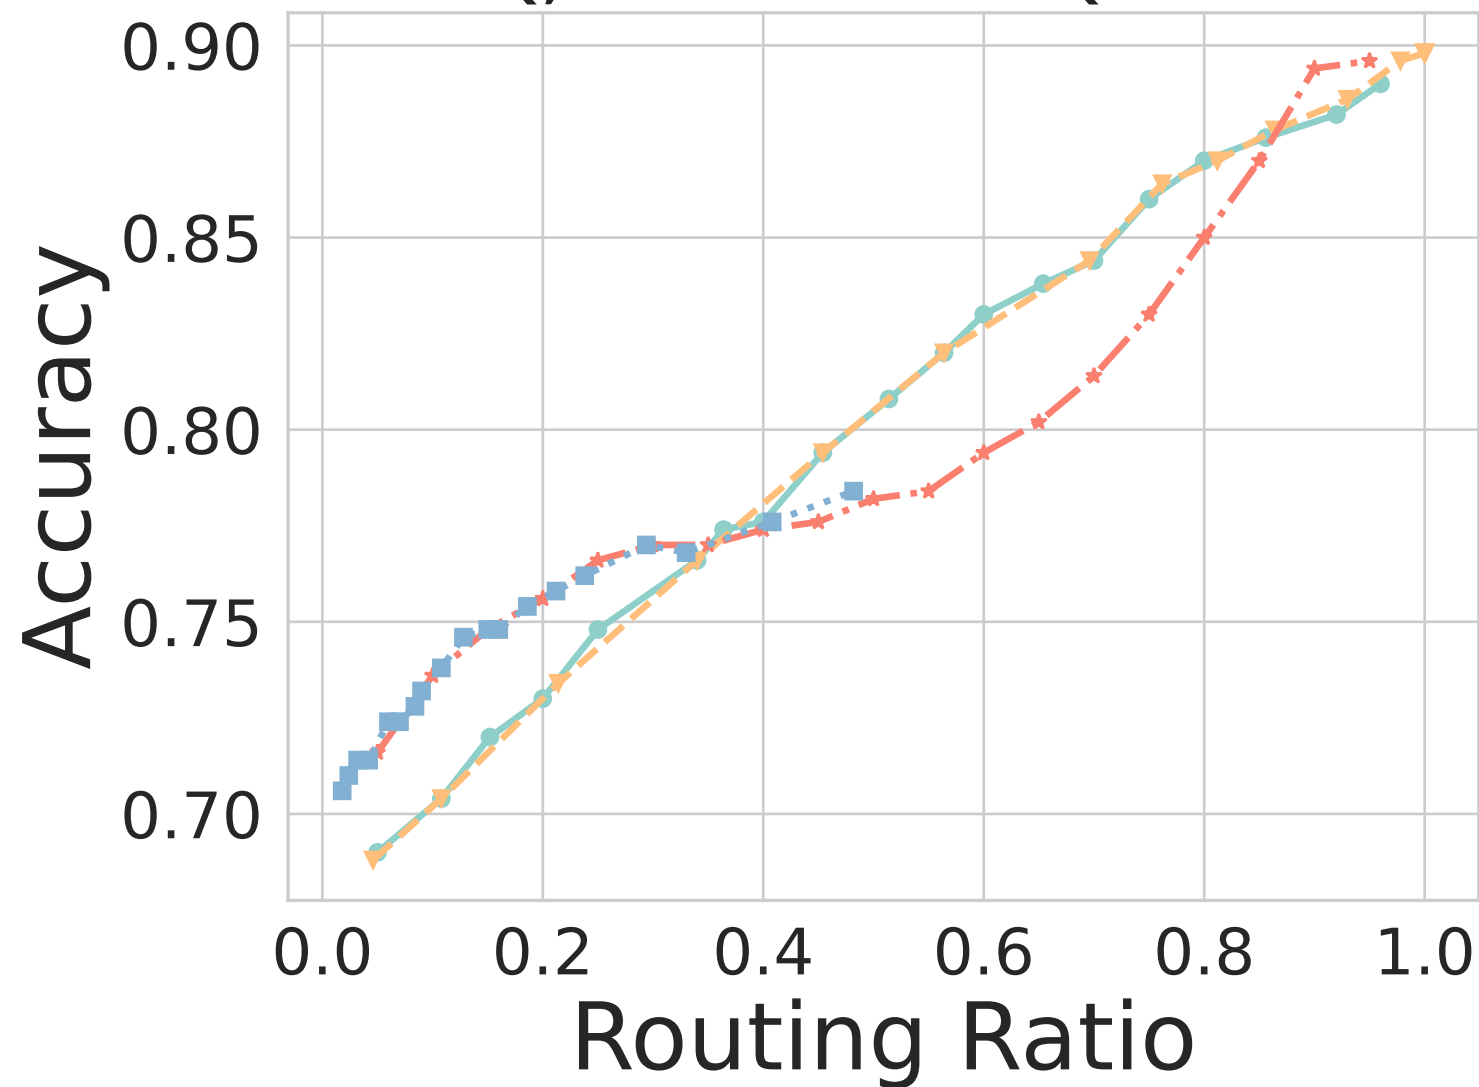

Supplement: supplementary_material [file cali_down_boolq_llama-3.2-3b_Qwen_Qwen3-32B.pdf › Routing_SLM_LLMs/Proxy_routing_prediction/to_Qwen_Qwen3-32B/boolq_as_downstream/cali_down_boolq_llama-3.2-3b_Qwen_Qwen3-32B.pdf]

**BoolQ, mistral-7b to Qwen3-32B**

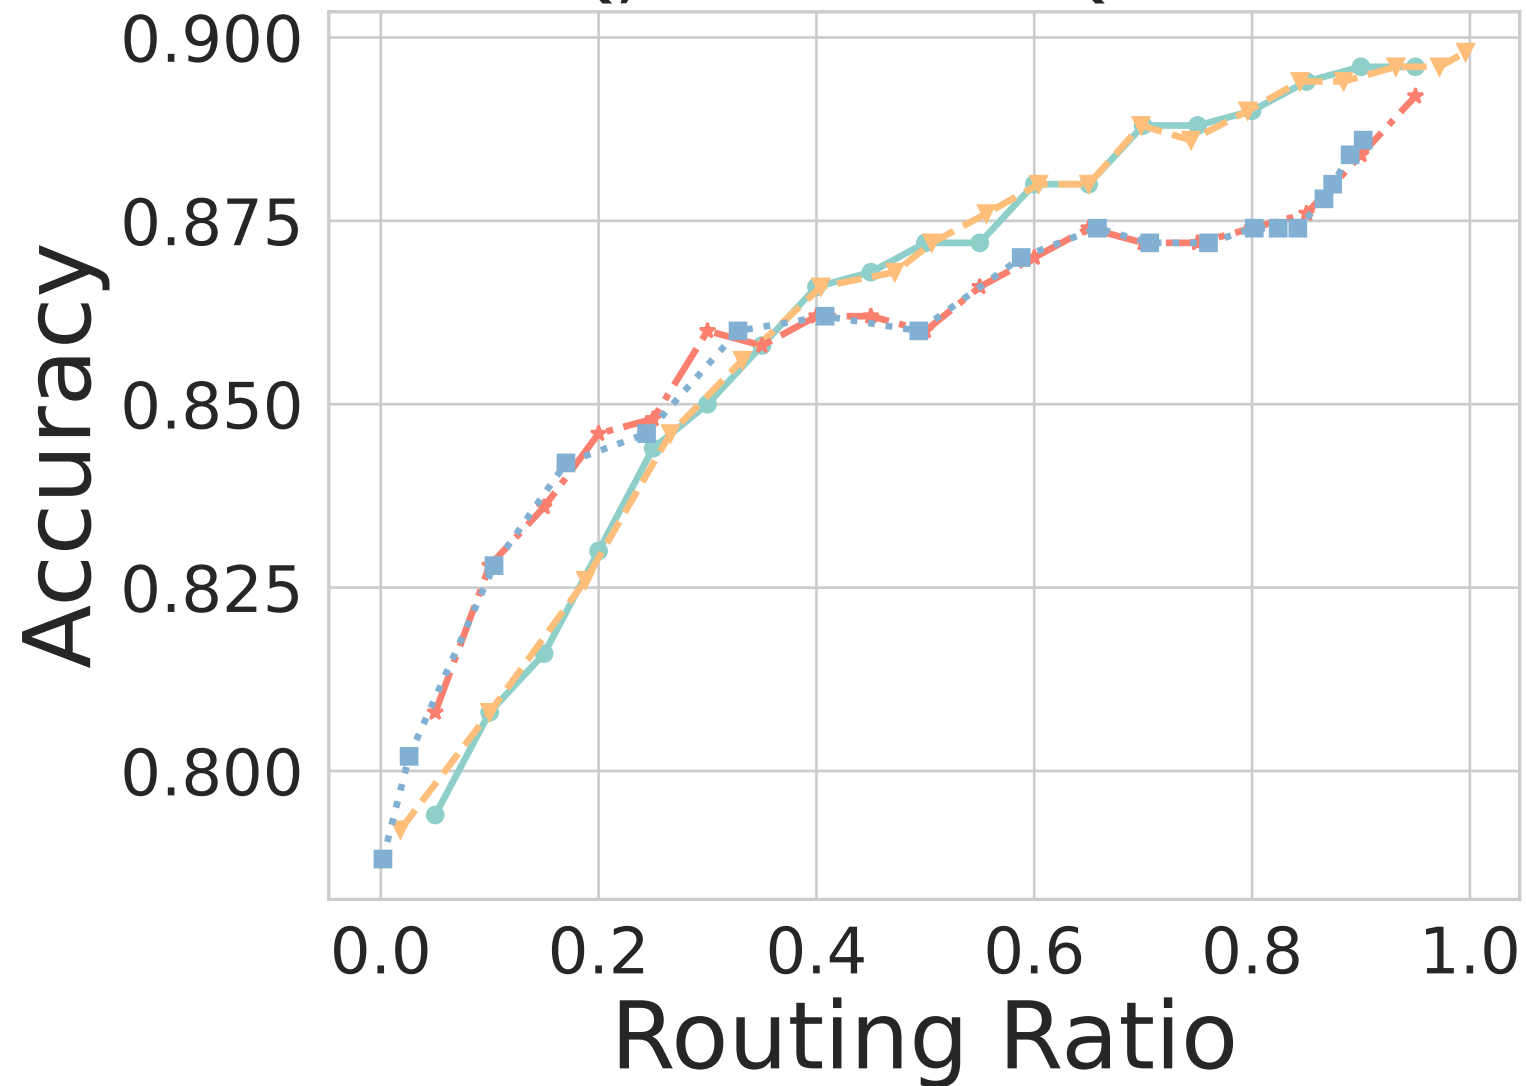

Supplement: supplementary_material [file cali_down_boolq_mistral-7b_Qwen_Qwen3-32B.pdf › Routing_SLM_LLMs/Proxy_routing_prediction/to_Qwen_Qwen3-32B/boolq_as_downstream/cali_down_boolq_mistral-7b_Qwen_Qwen3-32B.pdf]

**BoolQ, phi-3.5-mini to Qwen3-32B**

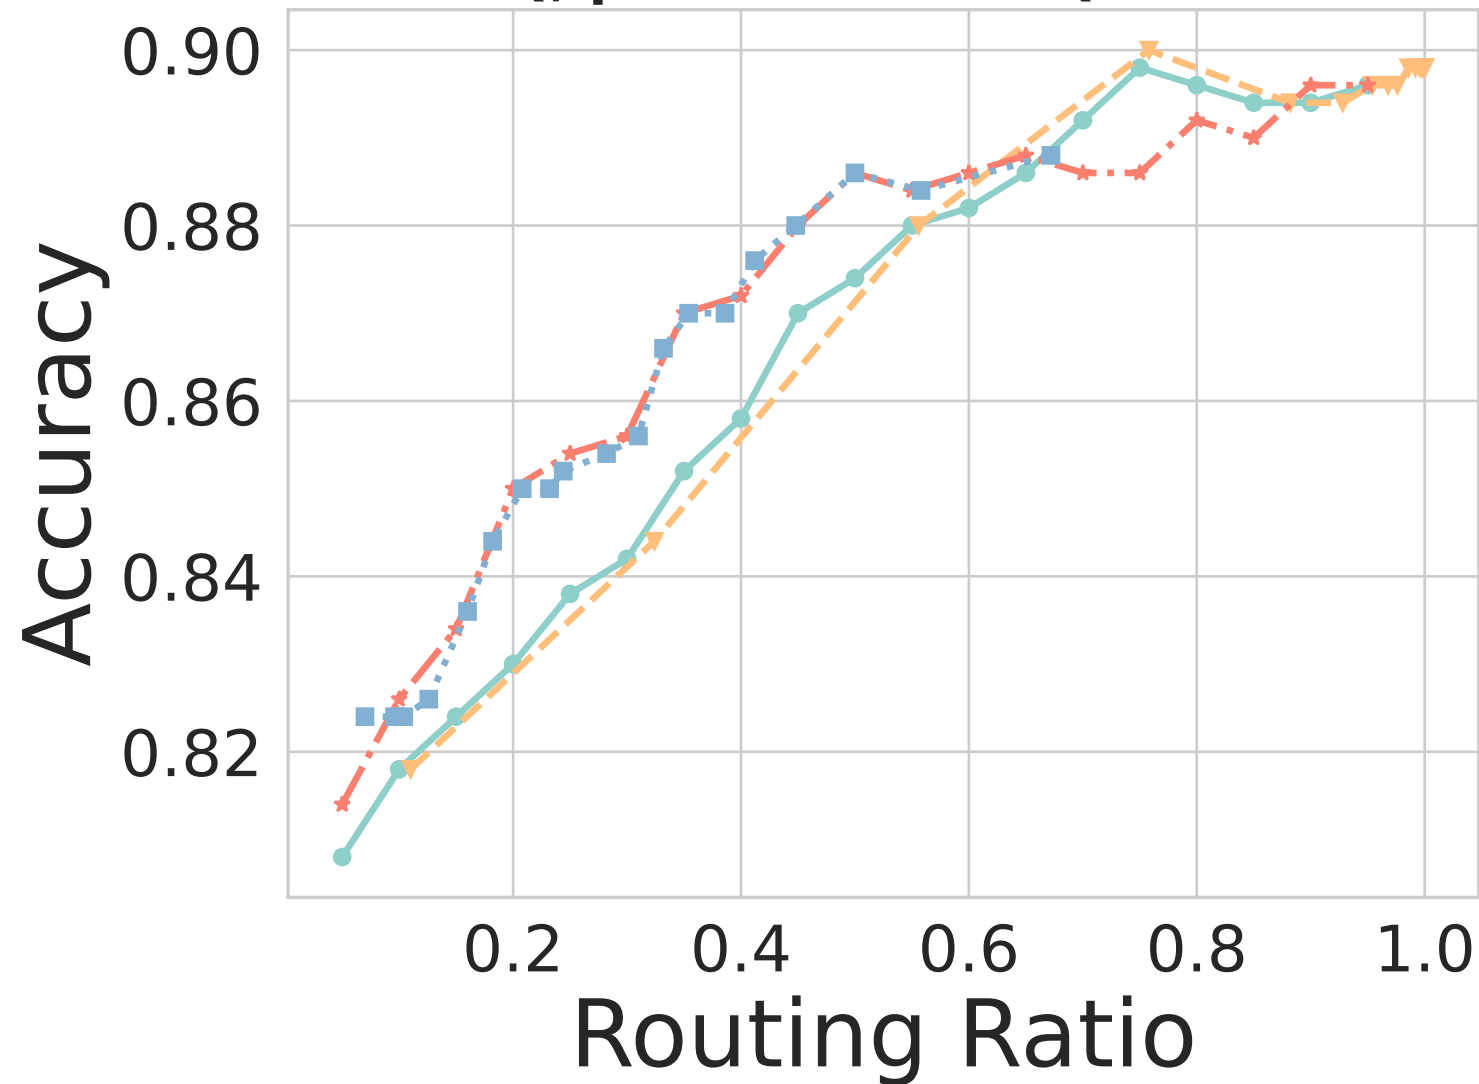

Supplement: supplementary_material [file cali_down_boolq_phi-3.5-mini_Qwen_Qwen3-32B.pdf › Routing_SLM_LLMs/Proxy_routing_prediction/to_Qwen_Qwen3-32B/boolq_as_downstream/cali_down_boolq_phi-3.5-mini_Qwen_Qwen3-32B.pdf]

**BoolQ, phi-4-mini-reasoning to Qwen3-32B**

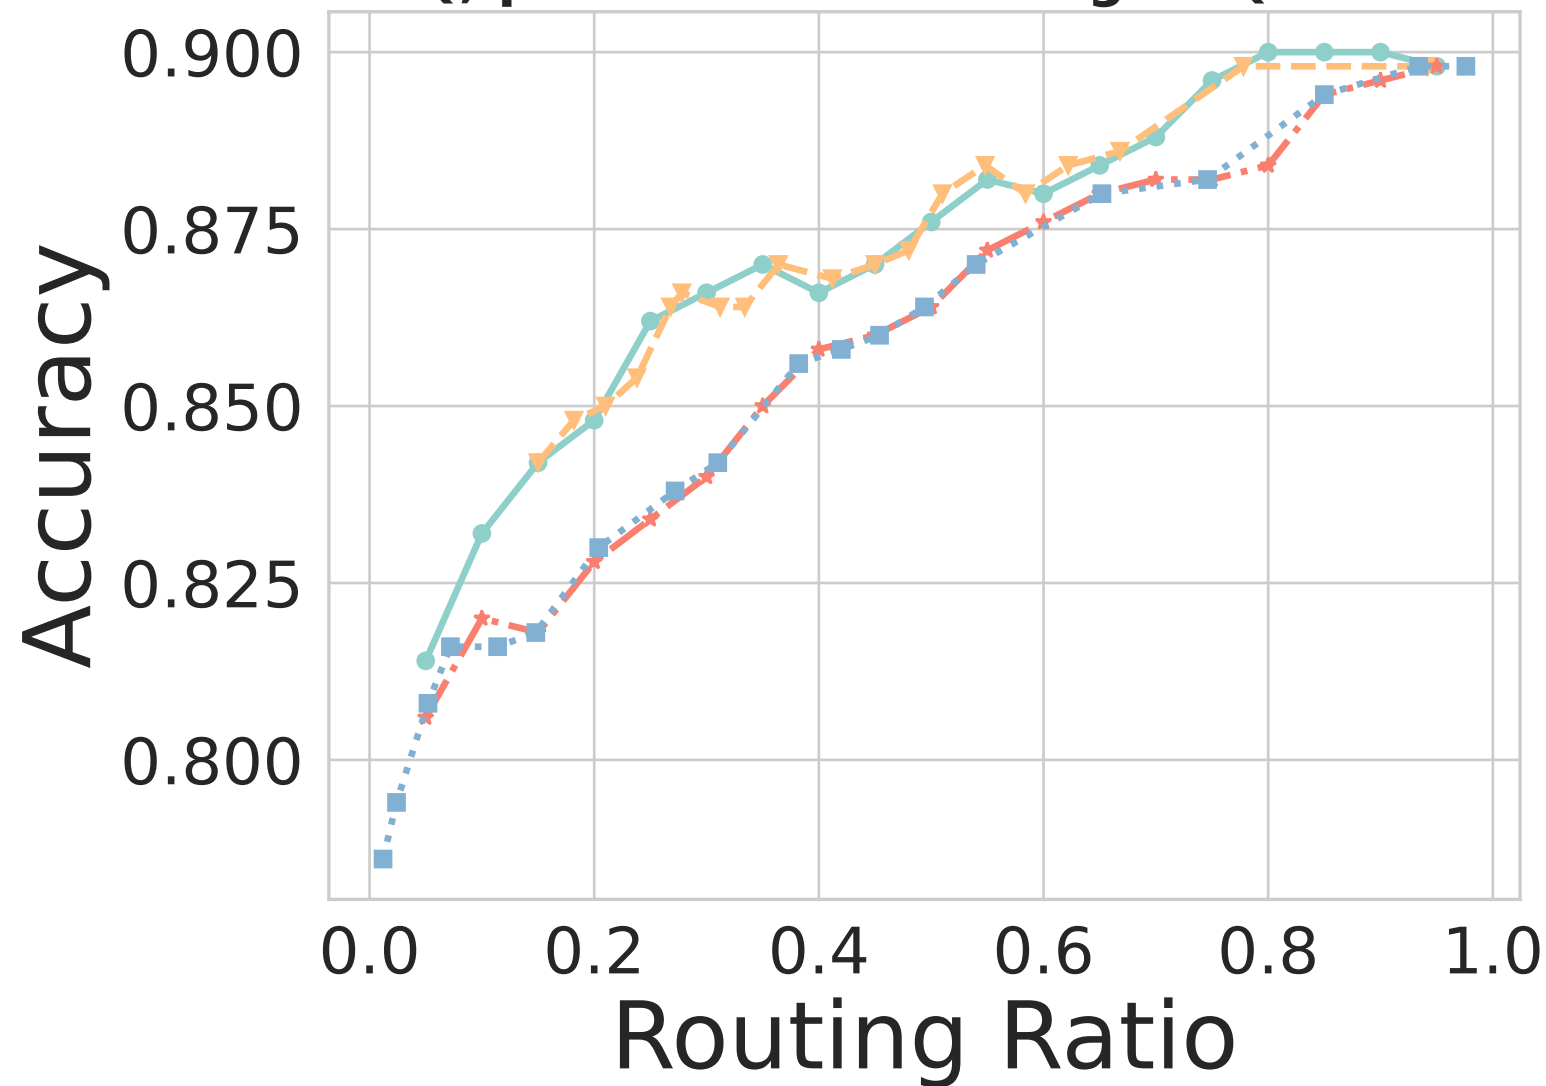

Supplement: supplementary_material [file cali_down_boolq_phi-4-mini-reasoning_Qwen_Qwen3-32B.pdf › Routing_SLM_LLMs/Proxy_routing_prediction/to_Qwen_Qwen3-32B/boolq_as_downstream/cali_down_boolq_phi-4-mini-reasoning_Qwen_Qwen3-32B.pdf]

**BoolQ, qwen-2.5-7b to Qwen3-32B**

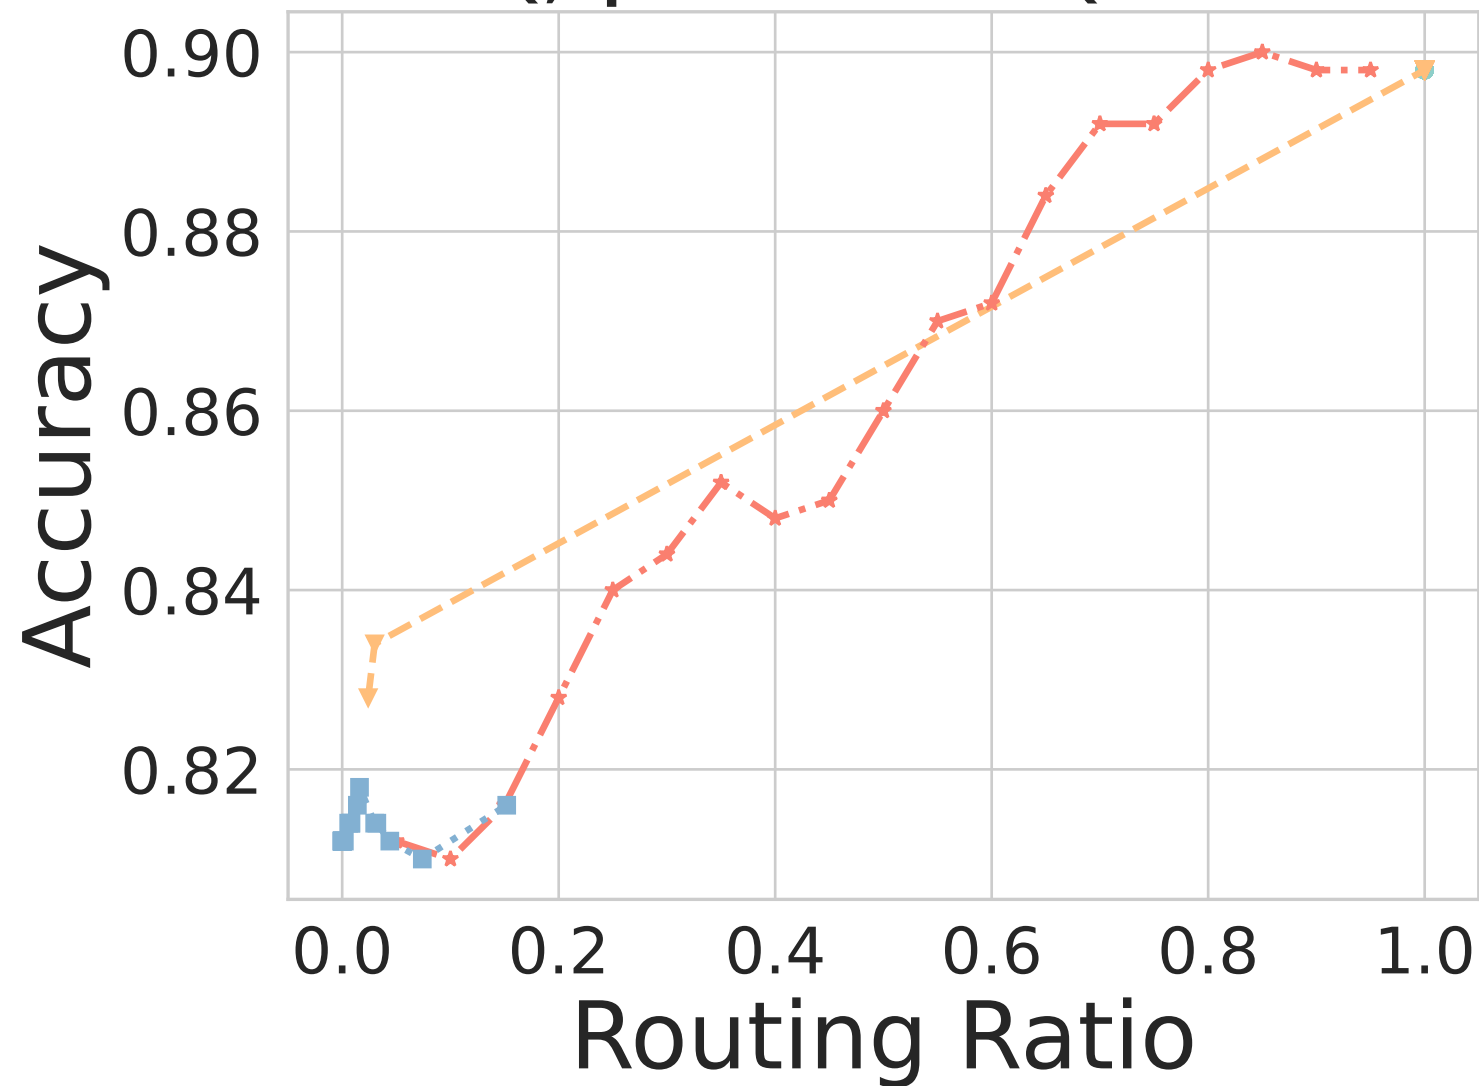

Supplement: supplementary_material [file cali_down_boolq_qwen-2.5-7b_Qwen_Qwen3-32B.pdf › Routing_SLM_LLMs/Proxy_routing_prediction/to_Qwen_Qwen3-32B/boolq_as_downstream/cali_down_boolq_qwen-2.5-7b_Qwen_Qwen3-32B.pdf]

**BoolQ, rwkv to Qwen3-32B**

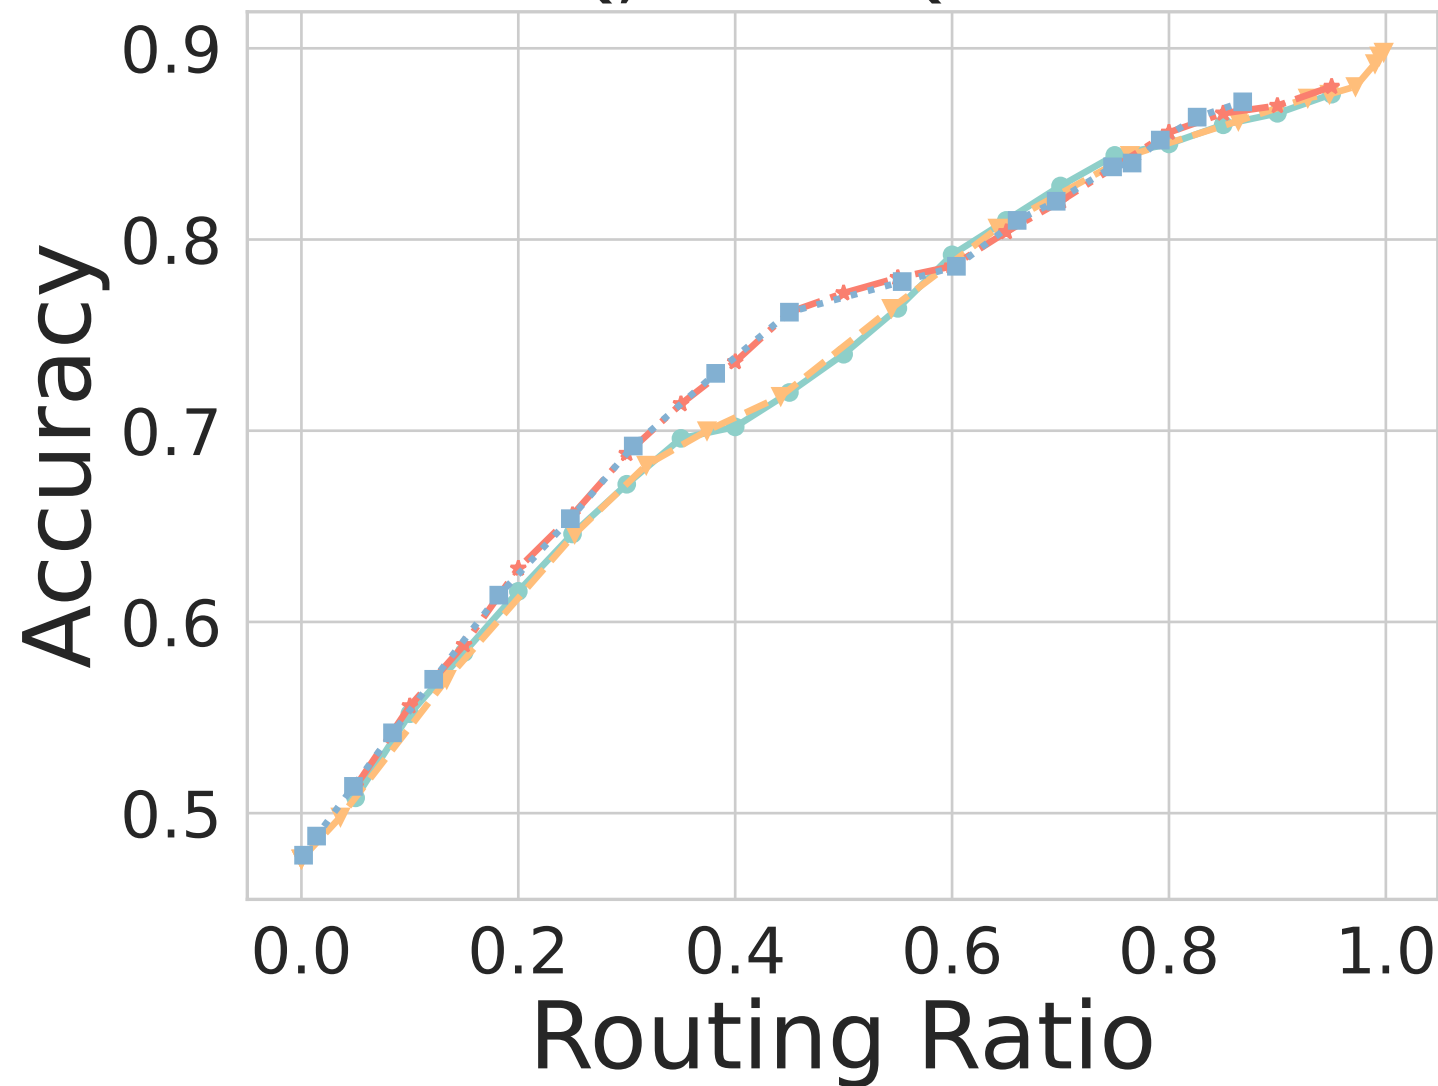

Supplement: supplementary_material [file cali_down_boolq_rwkv_Qwen_Qwen3-32B.pdf › Routing_SLM_LLMs/Proxy_routing_prediction/to_Qwen_Qwen3-32B/boolq_as_downstream/cali_down_boolq_rwkv_Qwen_Qwen3-32B.pdf]

**CoQA, Qwen3-0.6B to Qwen3-32B**

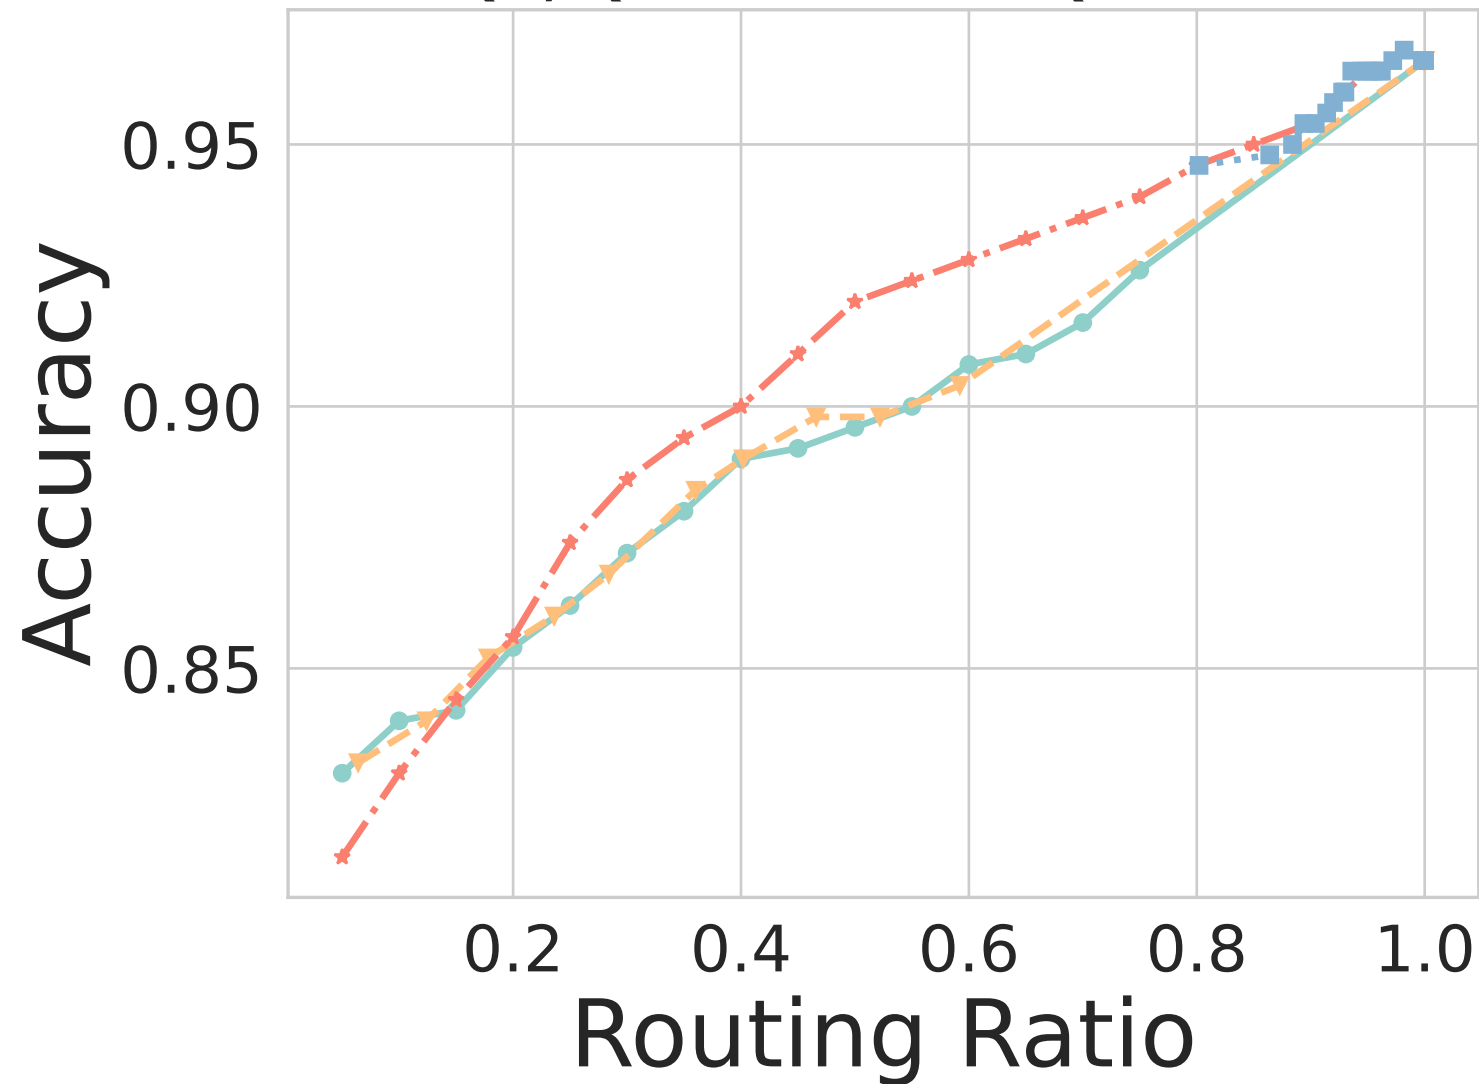

Supplement: supplementary_material [file cali_down_co_qa_Qwen3-0.6B_Qwen_Qwen3-32B.pdf › Routing_SLM_LLMs/Proxy_routing_prediction/to_Qwen_Qwen3-32B/co_qa_as_downstream/cali_down_co_qa_Qwen3-0.6B_Qwen_Qwen3-32B.pdf]

CoQA, Qwen3-1.7B to Qwen3-32B

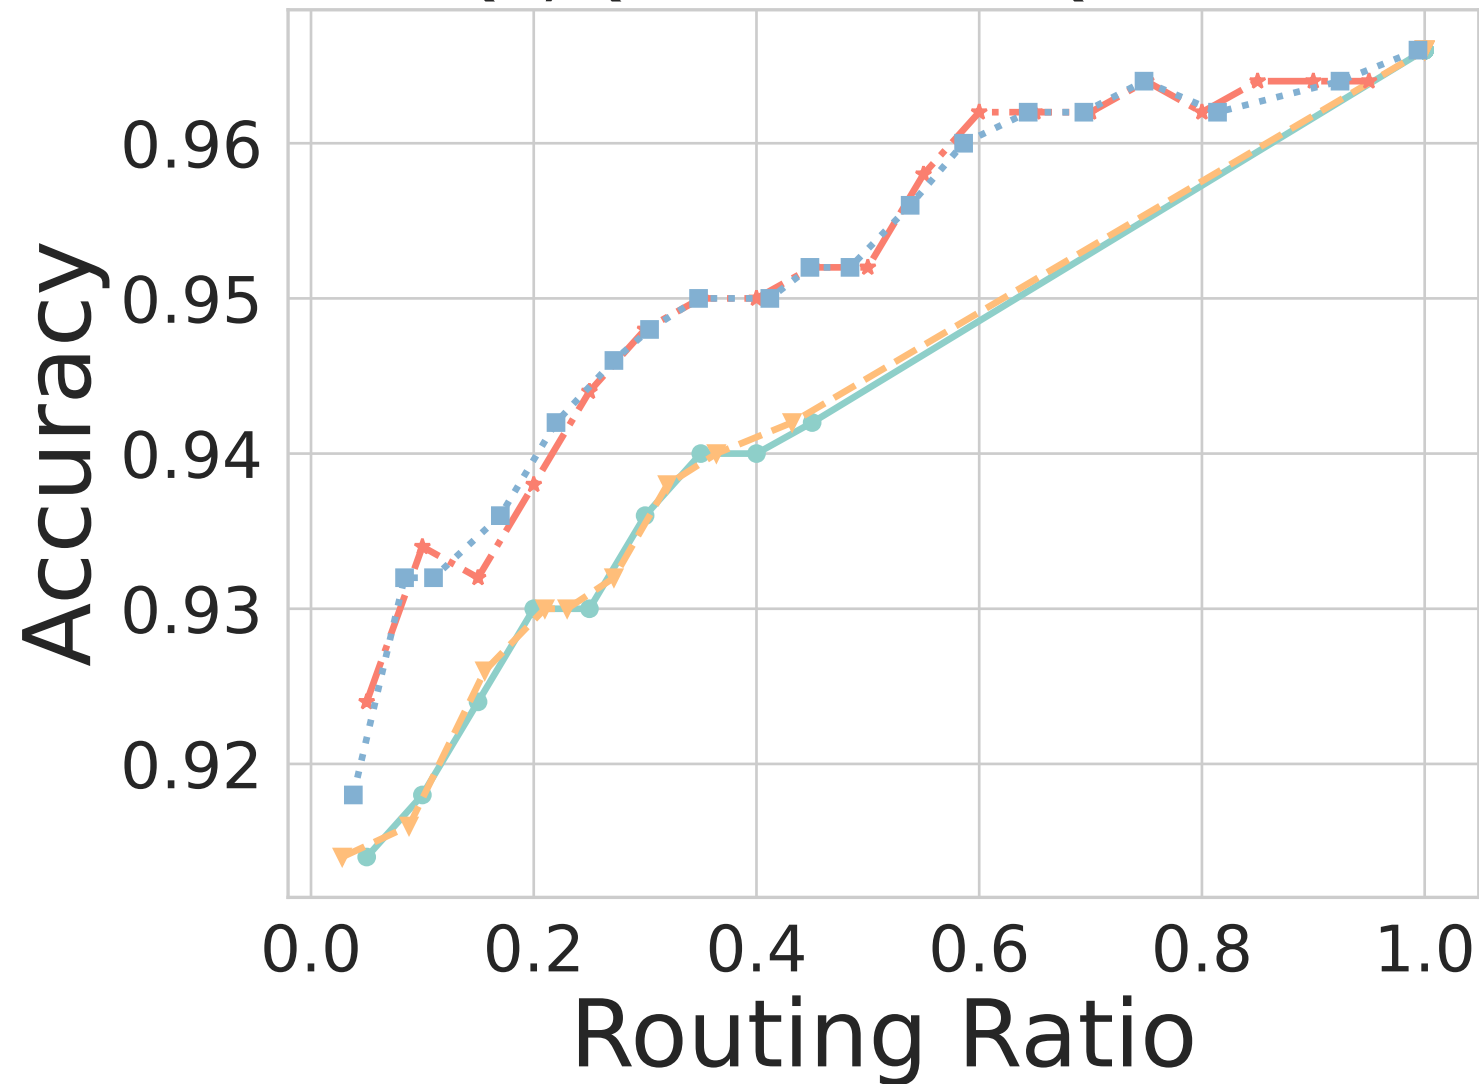

Supplement: supplementary_material [file cali_down_co_qa_Qwen3-1.7B_Qwen_Qwen3-32B.pdf › Routing_SLM_LLMs/Proxy_routing_prediction/to_Qwen_Qwen3-32B/co_qa_as_downstream/cali_down_co_qa_Qwen3-1.7B_Qwen_Qwen3-32B.pdf]

CoQA, Qwen3-4B to Qwen3-32B

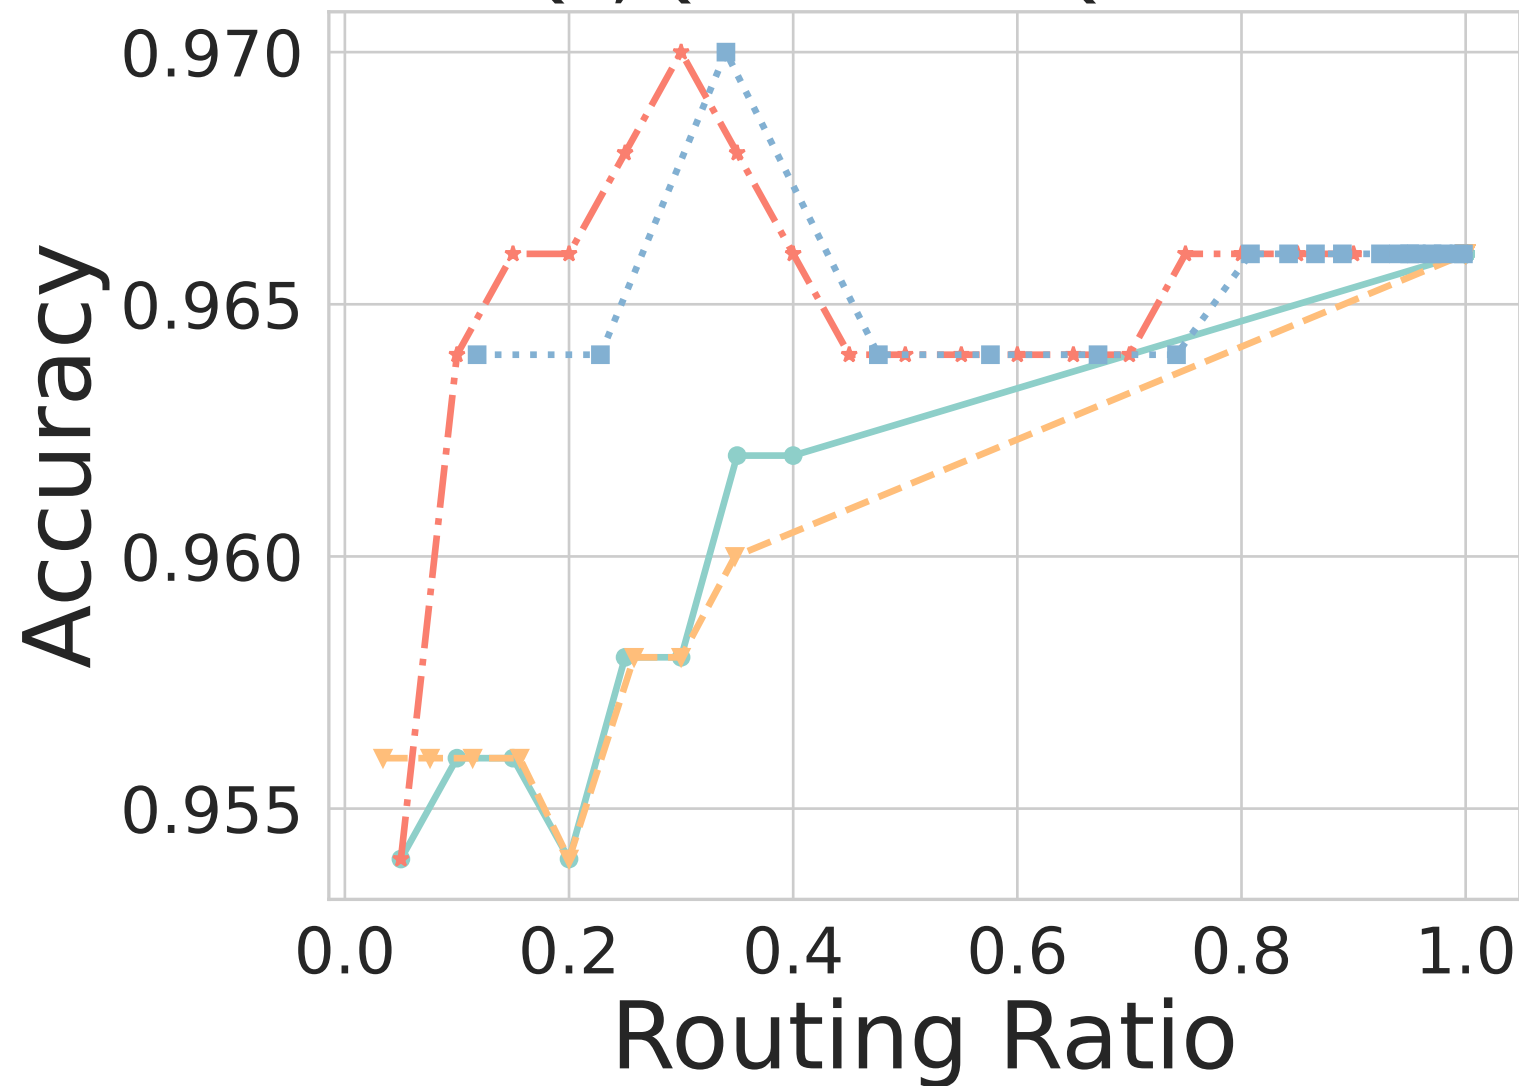

Supplement: supplementary_material [file cali_down_co_qa_Qwen3-4B_Qwen_Qwen3-32B.pdf › Routing_SLM_LLMs/Proxy_routing_prediction/to_Qwen_Qwen3-32B/co_qa_as_downstream/cali_down_co_qa_Qwen3-4B_Qwen_Qwen3-32B.pdf]

CoQA, granite-3.1-8b to Qwen3-32B

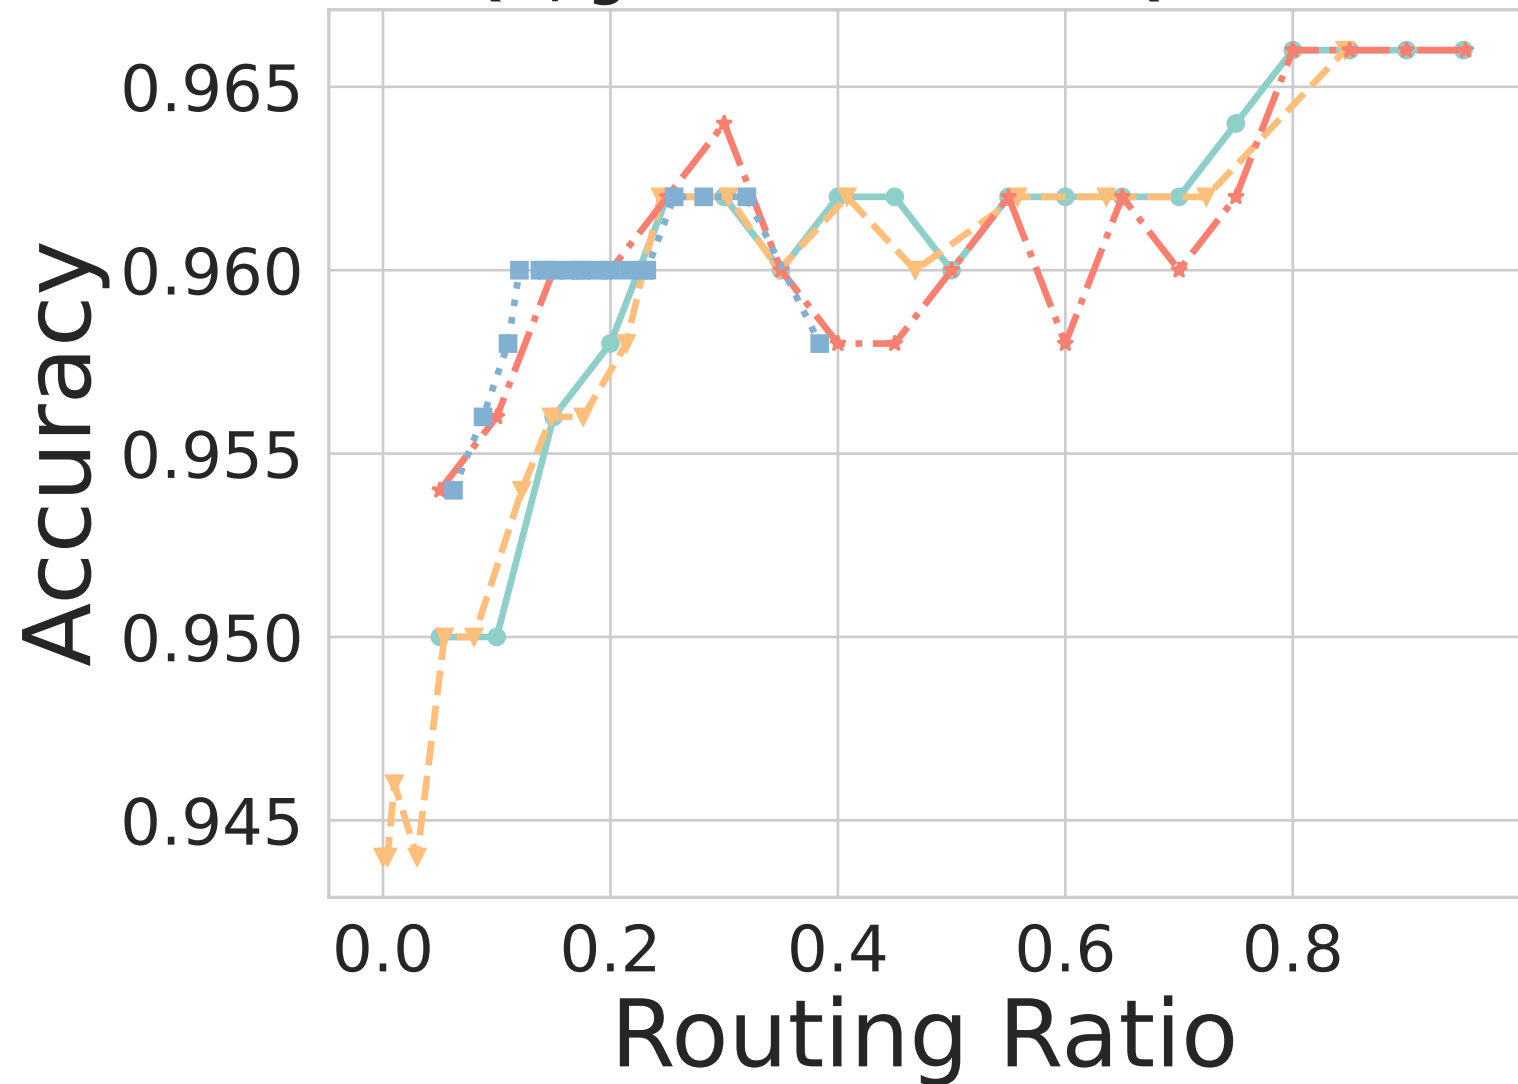

Supplement: supplementary_material [file cali_down_co_qa_granite-3.1-8b_Qwen_Qwen3-32B.pdf › Routing_SLM_LLMs/Proxy_routing_prediction/to_Qwen_Qwen3-32B/co_qa_as_downstream/cali_down_co_qa_granite-3.1-8b_Qwen_Qwen3-32B.pdf]

CoQA, llama-3.1-8b to Qwen3-32B

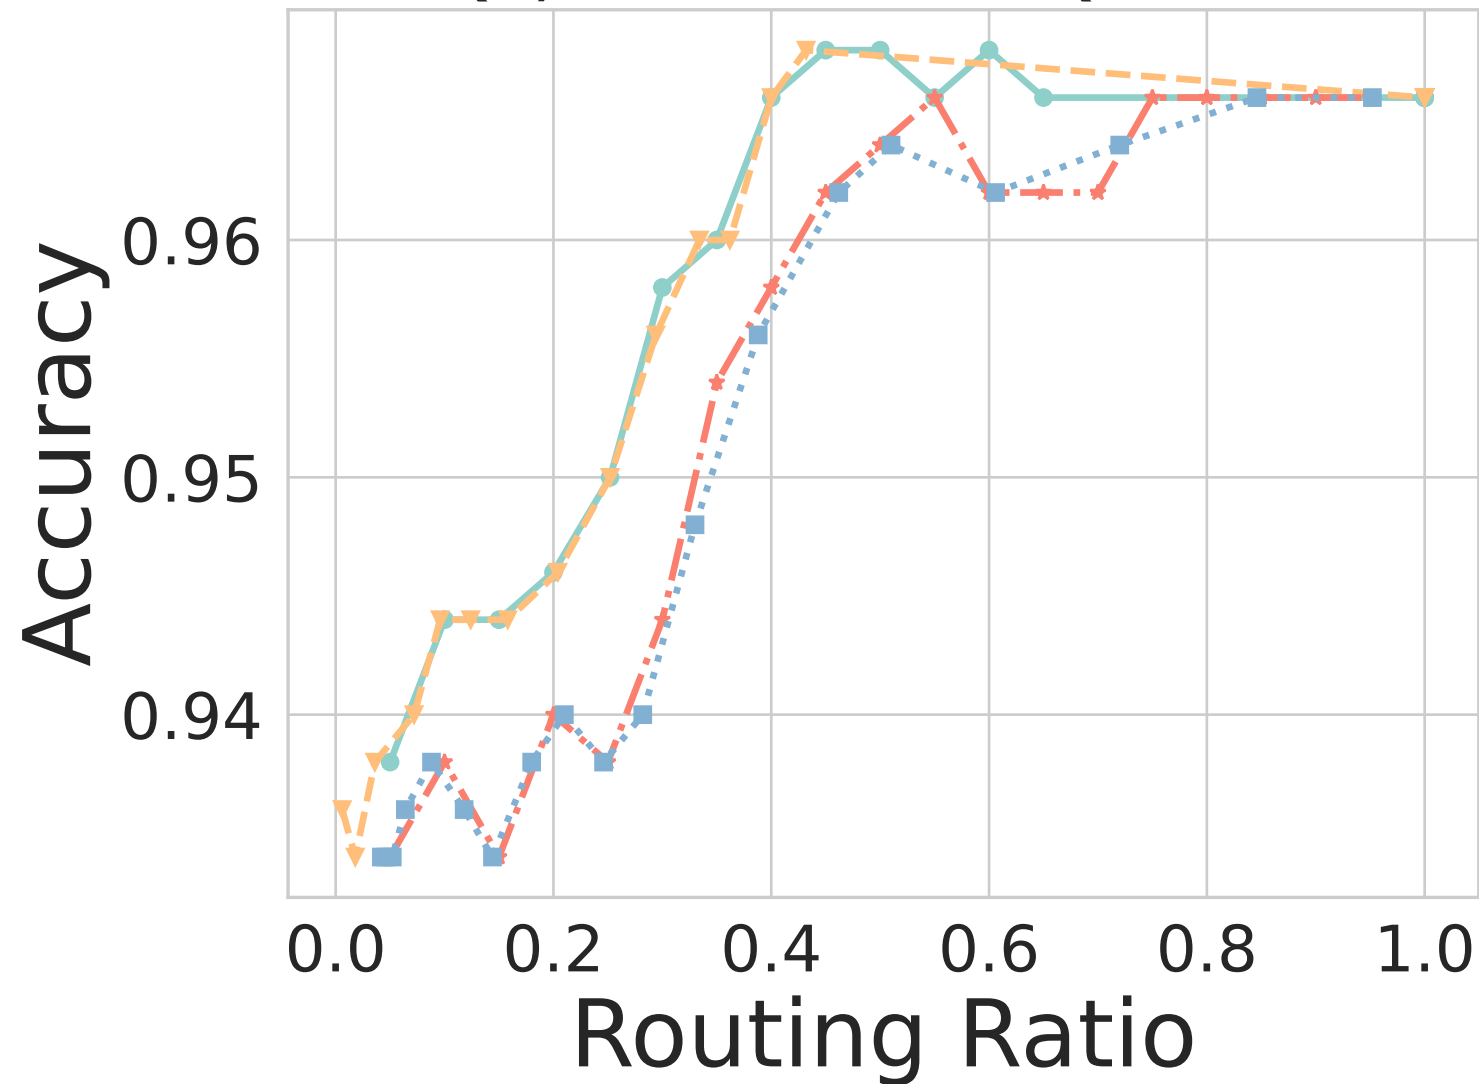

Supplement: supplementary_material [file cali_down_co_qa_llama-3.1-8b_Qwen_Qwen3-32B.pdf › Routing_SLM_LLMs/Proxy_routing_prediction/to_Qwen_Qwen3-32B/co_qa_as_downstream/cali_down_co_qa_llama-3.1-8b_Qwen_Qwen3-32B.pdf]

CoQA, llama-3.2-1b to Qwen3-32B

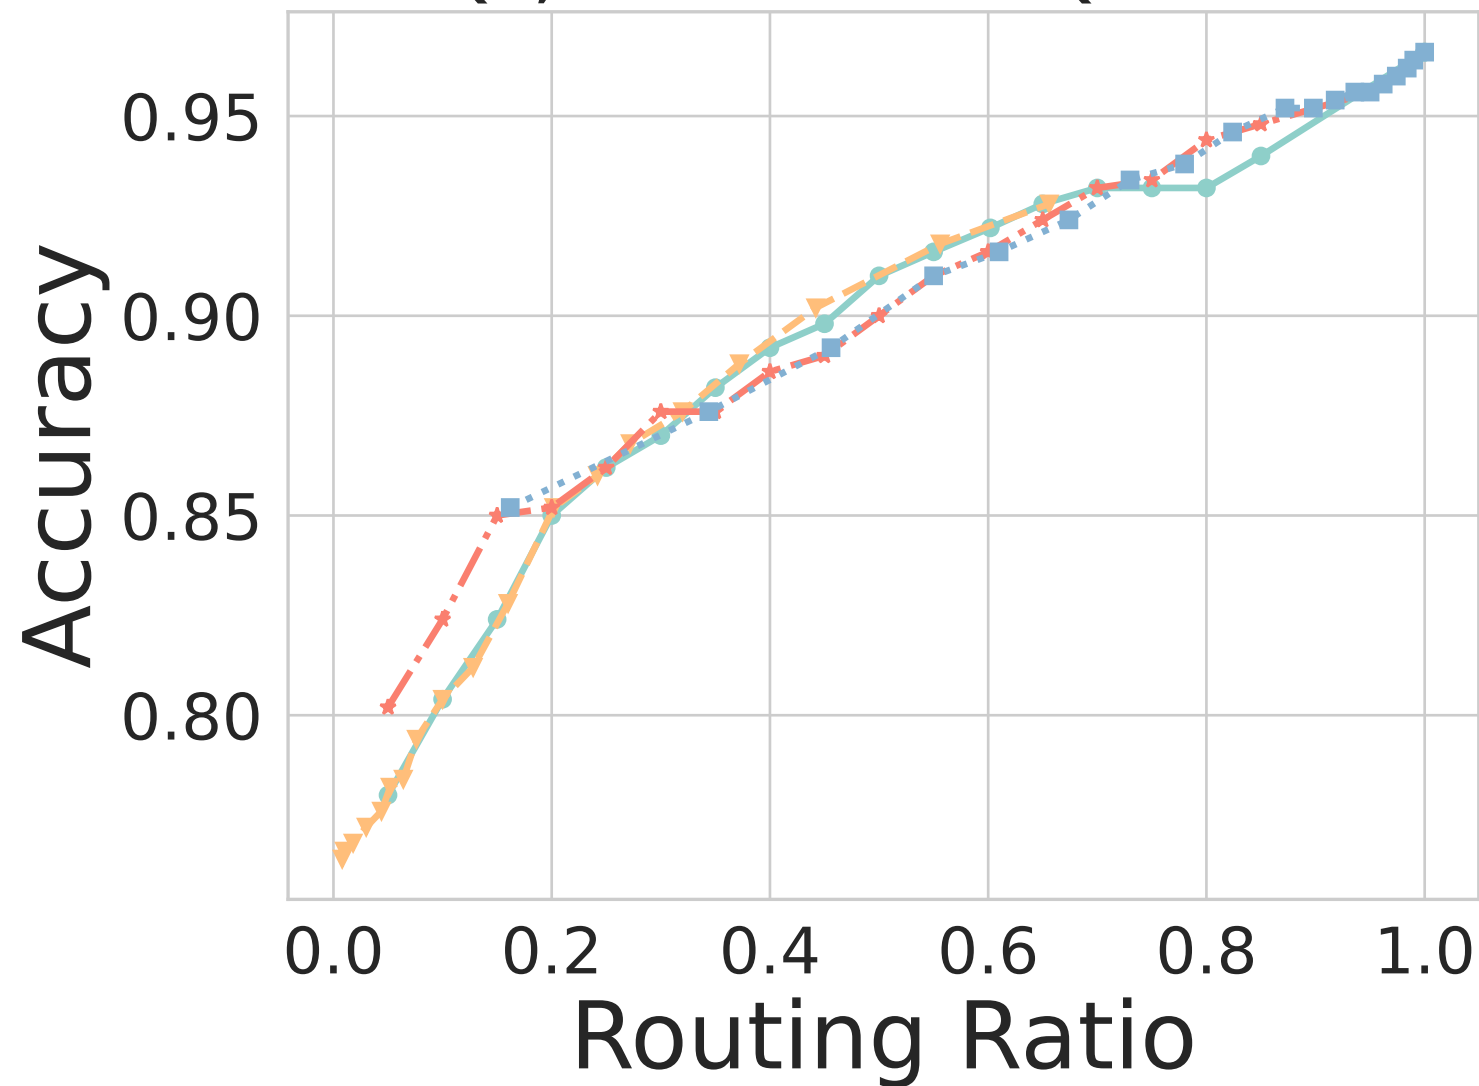

Supplement: supplementary_material [file cali_down_co_qa_llama-3.2-1b_Qwen_Qwen3-32B.pdf › Routing_SLM_LLMs/Proxy_routing_prediction/to_Qwen_Qwen3-32B/co_qa_as_downstream/cali_down_co_qa_llama-3.2-1b_Qwen_Qwen3-32B.pdf]

CoQA, llama-3.2-3b to Qwen3-32B

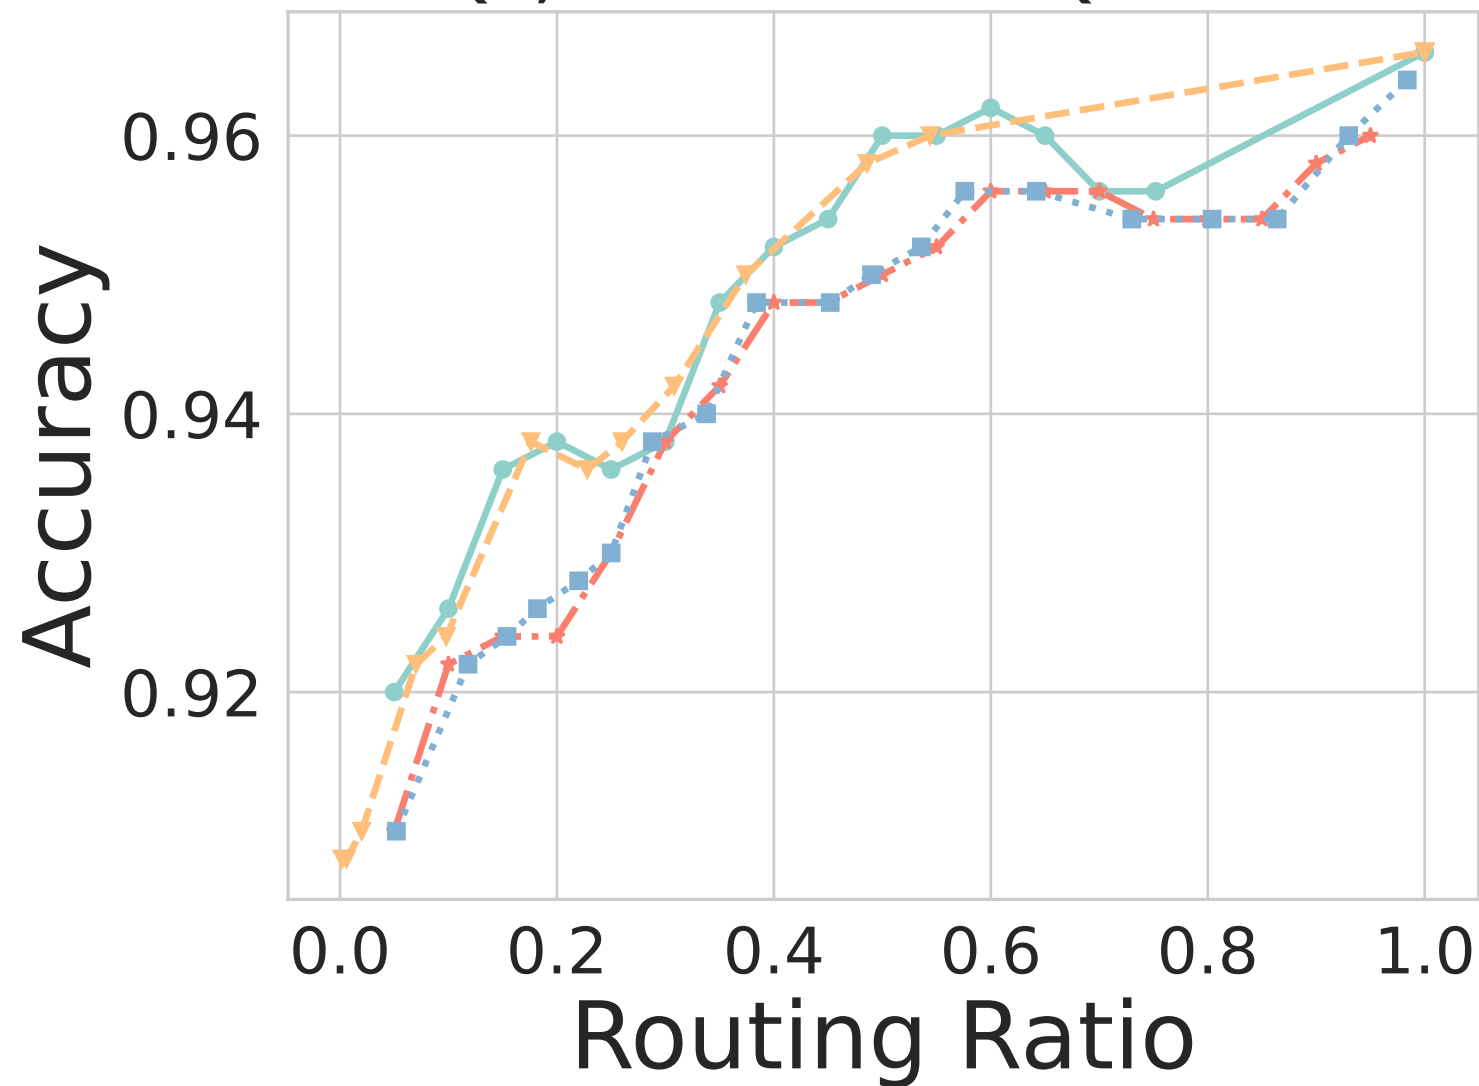

Supplement: supplementary_material [file cali_down_co_qa_llama-3.2-3b_Qwen_Qwen3-32B.pdf › Routing_SLM_LLMs/Proxy_routing_prediction/to_Qwen_Qwen3-32B/co_qa_as_downstream/cali_down_co_qa_llama-3.2-3b_Qwen_Qwen3-32B.pdf]

CoQA, mistral-7b to Qwen3-32B

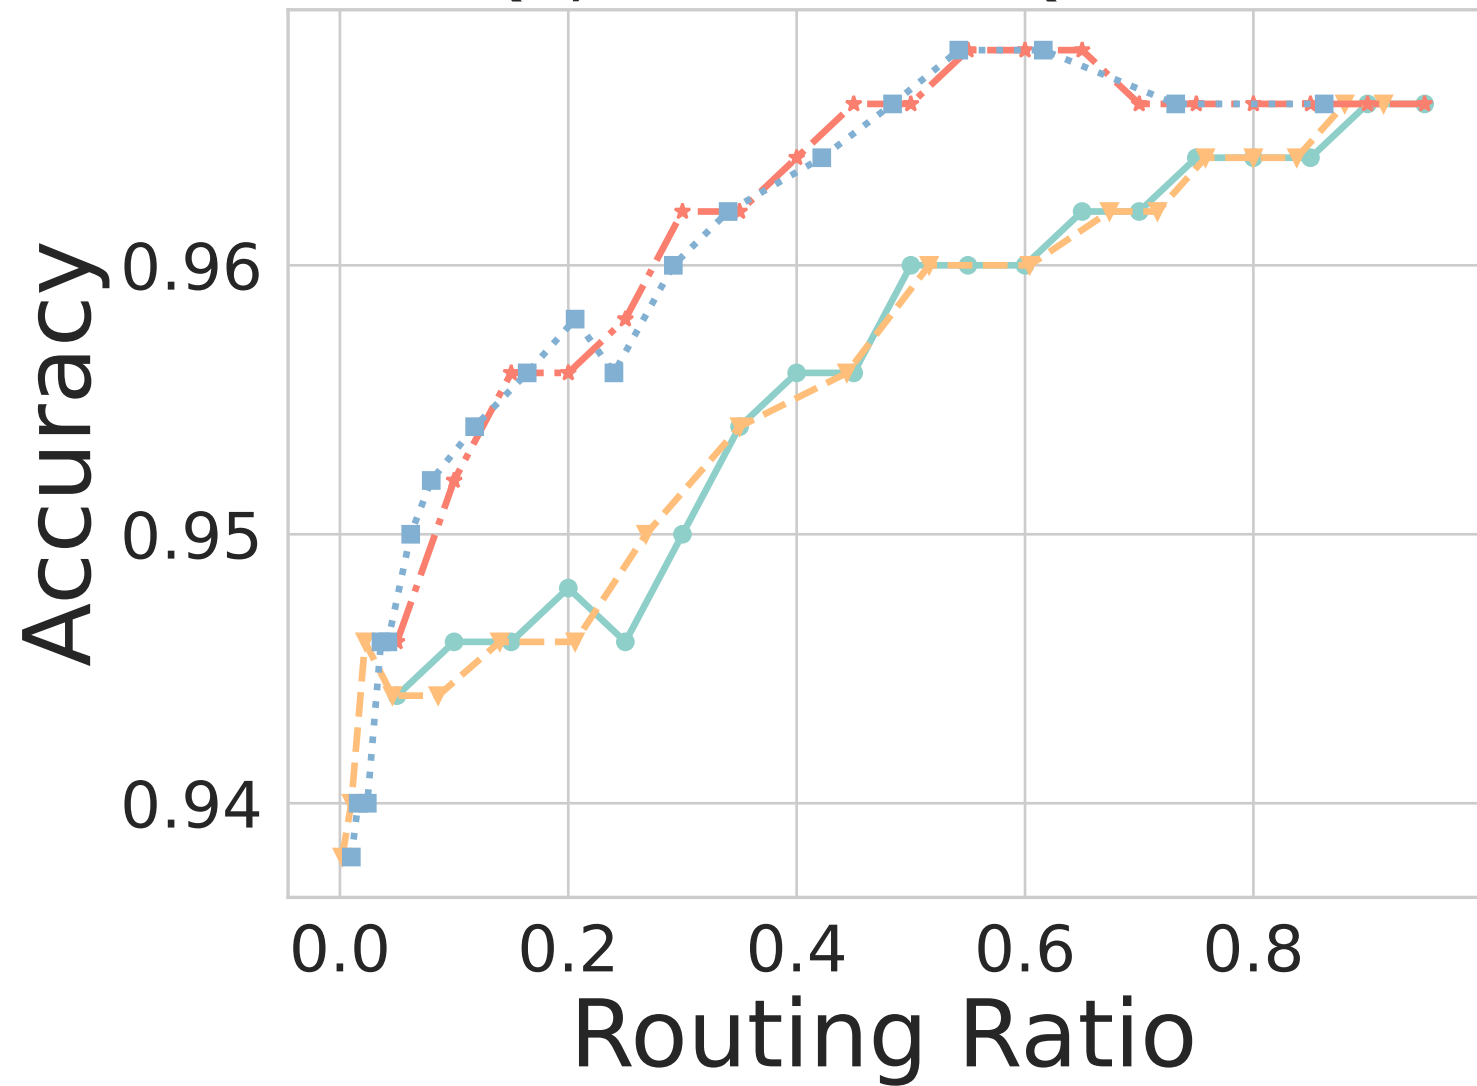

Supplement: supplementary_material [file cali_down_co_qa_mistral-7b_Qwen_Qwen3-32B.pdf › Routing_SLM_LLMs/Proxy_routing_prediction/to_Qwen_Qwen3-32B/co_qa_as_downstream/cali_down_co_qa_mistral-7b_Qwen_Qwen3-32B.pdf]

CoQA, phi-3.5-mini to Qwen3-32B

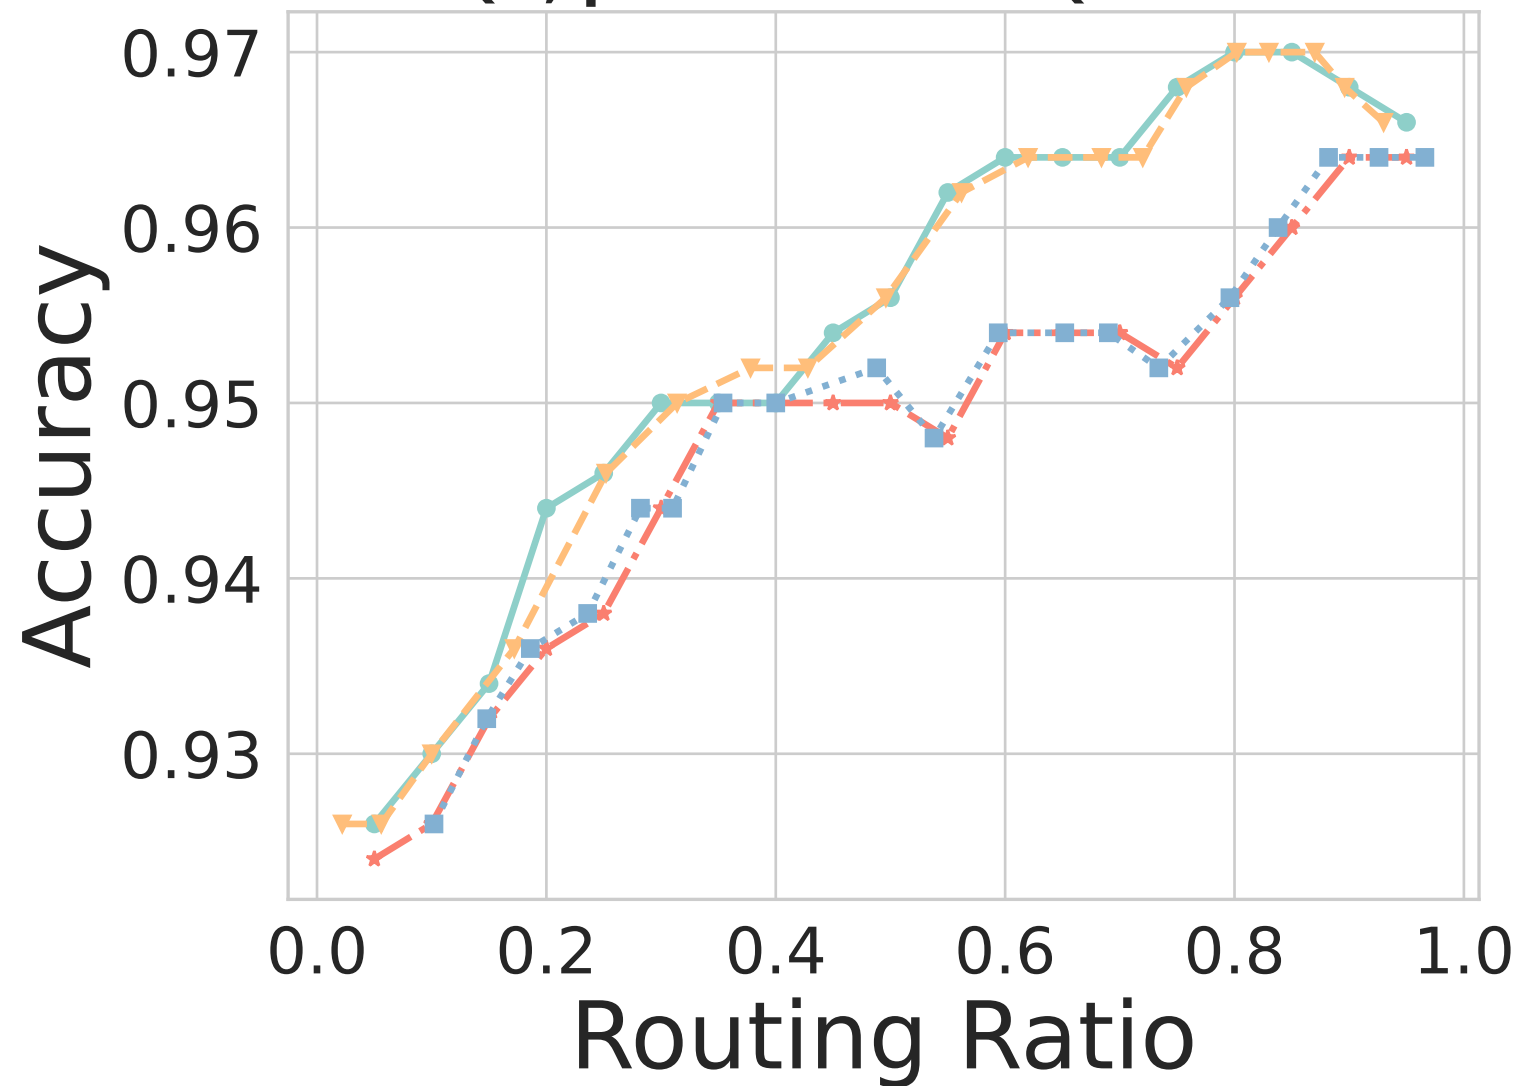

Supplement: supplementary_material [file cali_down_co_qa_phi-3.5-mini_Qwen_Qwen3-32B.pdf › Routing_SLM_LLMs/Proxy_routing_prediction/to_Qwen_Qwen3-32B/co_qa_as_downstream/cali_down_co_qa_phi-3.5-mini_Qwen_Qwen3-32B.pdf]

CoQA, phi-4-mini-reasoning to Qwen3-32B

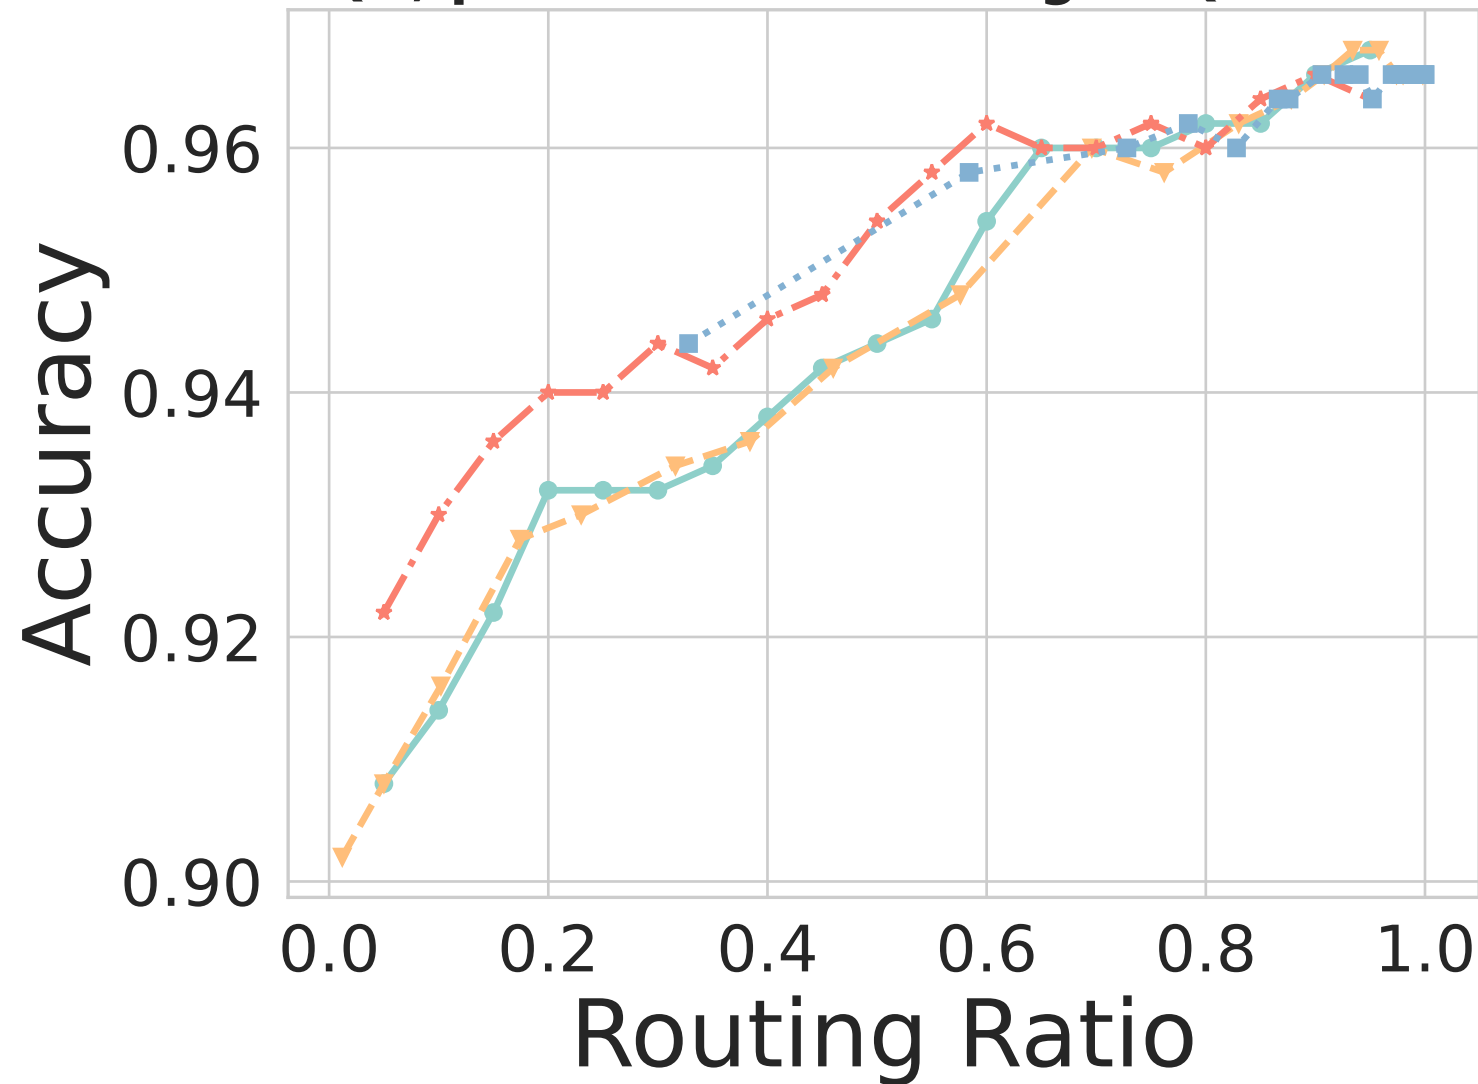

Supplement: supplementary_material [file cali_down_co_qa_phi-4-mini-reasoning_Qwen_Qwen3-32B.pdf › Routing_SLM_LLMs/Proxy_routing_prediction/to_Qwen_Qwen3-32B/co_qa_as_downstream/cali_down_co_qa_phi-4-mini-reasoning_Qwen_Qwen3-32B.pdf]

CoQA, qwen-2.5-7b to Qwen3-32B

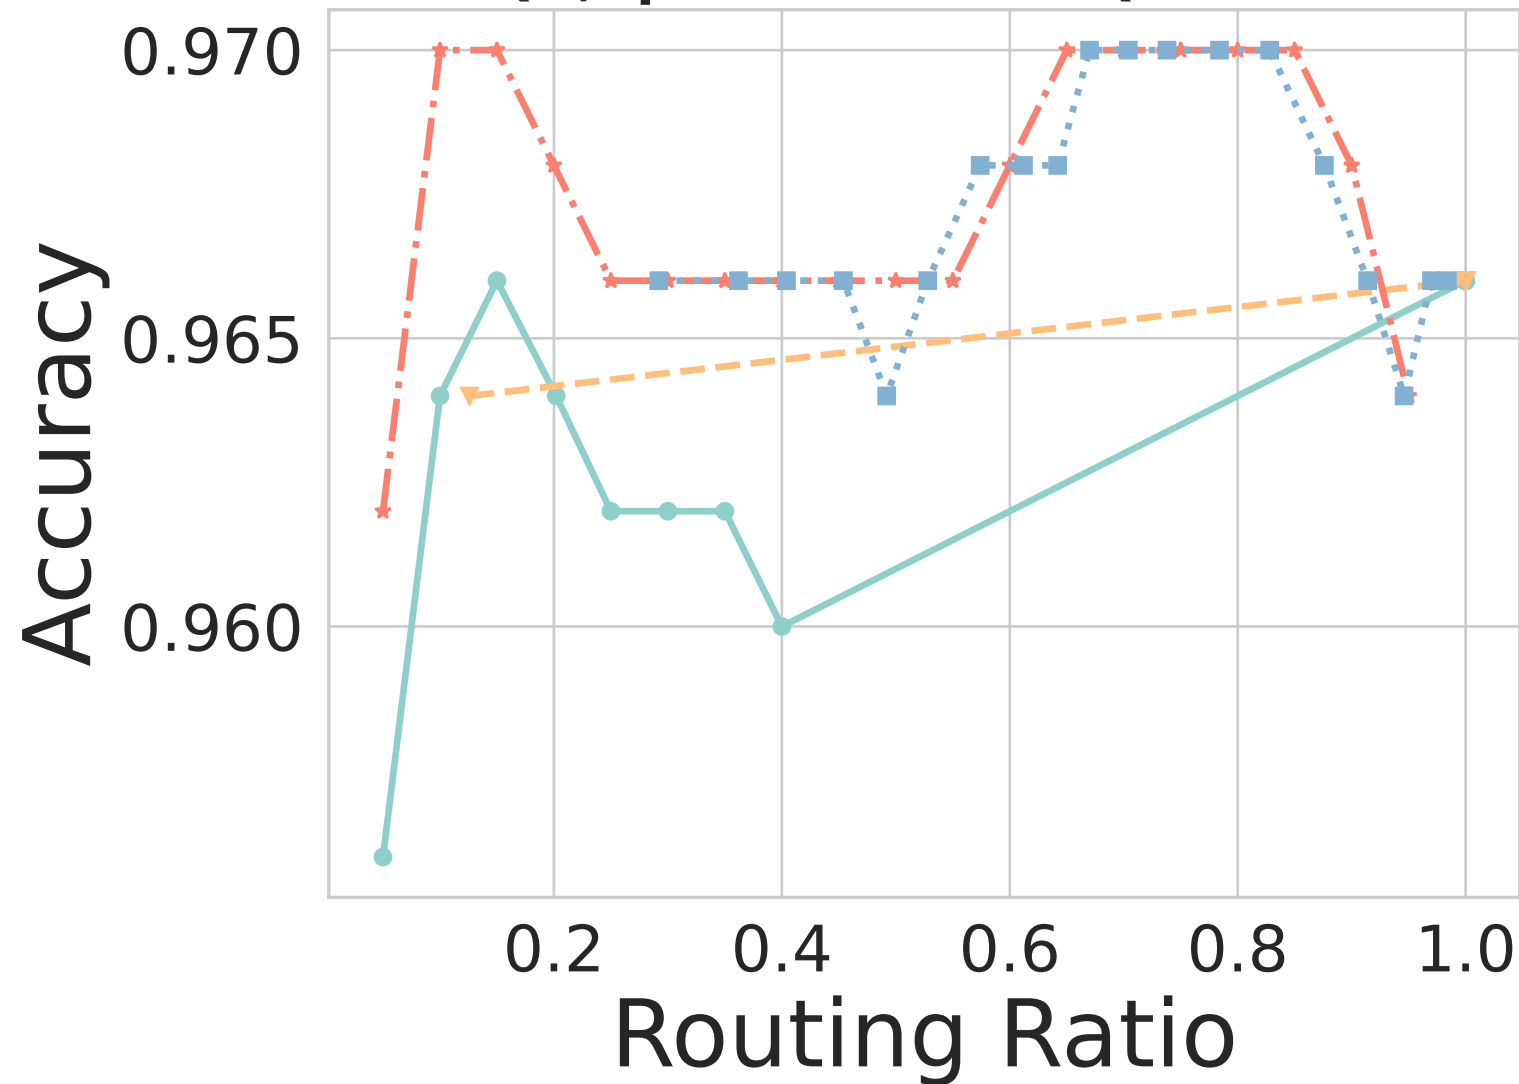

Supplement: supplementary_material [file cali_down_co_qa_qwen-2.5-7b_Qwen_Qwen3-32B.pdf › Routing_SLM_LLMs/Proxy_routing_prediction/to_Qwen_Qwen3-32B/co_qa_as_downstream/cali_down_co_qa_qwen-2.5-7b_Qwen_Qwen3-32B.pdf]

CoQA, rwkv to Qwen3-32B

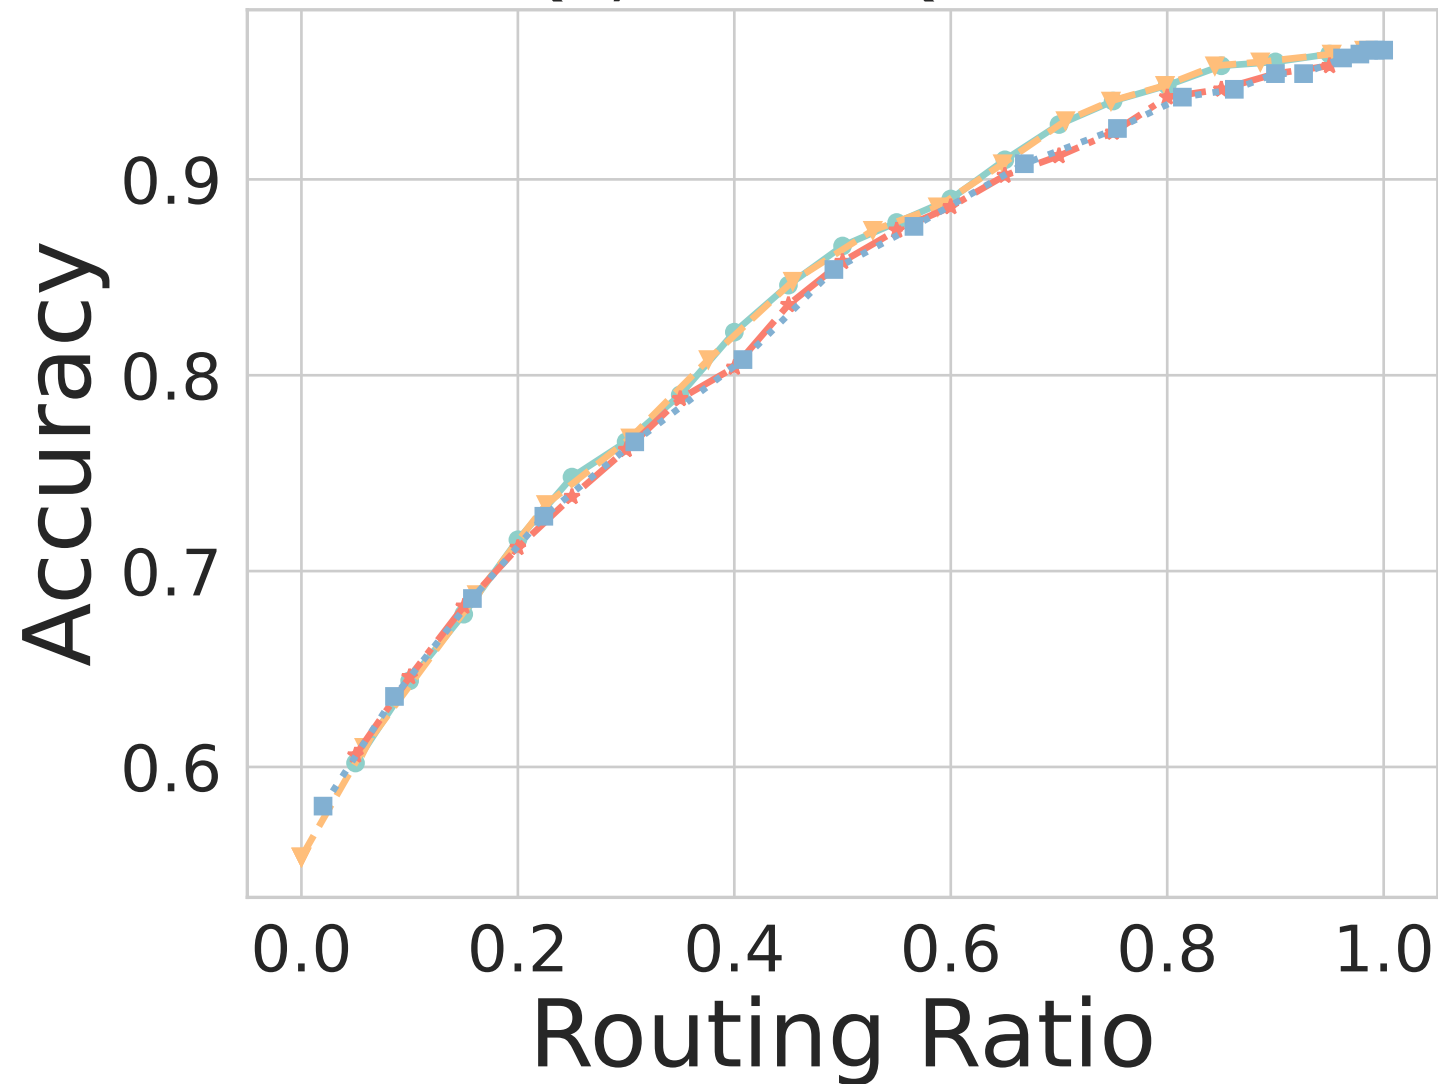

Supplement: supplementary_material [file cali_down_co_qa_rwkv_Qwen_Qwen3-32B.pdf › Routing_SLM_LLMs/Proxy_routing_prediction/to_Qwen_Qwen3-32B/co_qa_as_downstream/cali_down_co_qa_rwkv_Qwen_Qwen3-32B.pdf]

**CommonsenseQA, Qwen3-0.6B to Qwen3-32B**

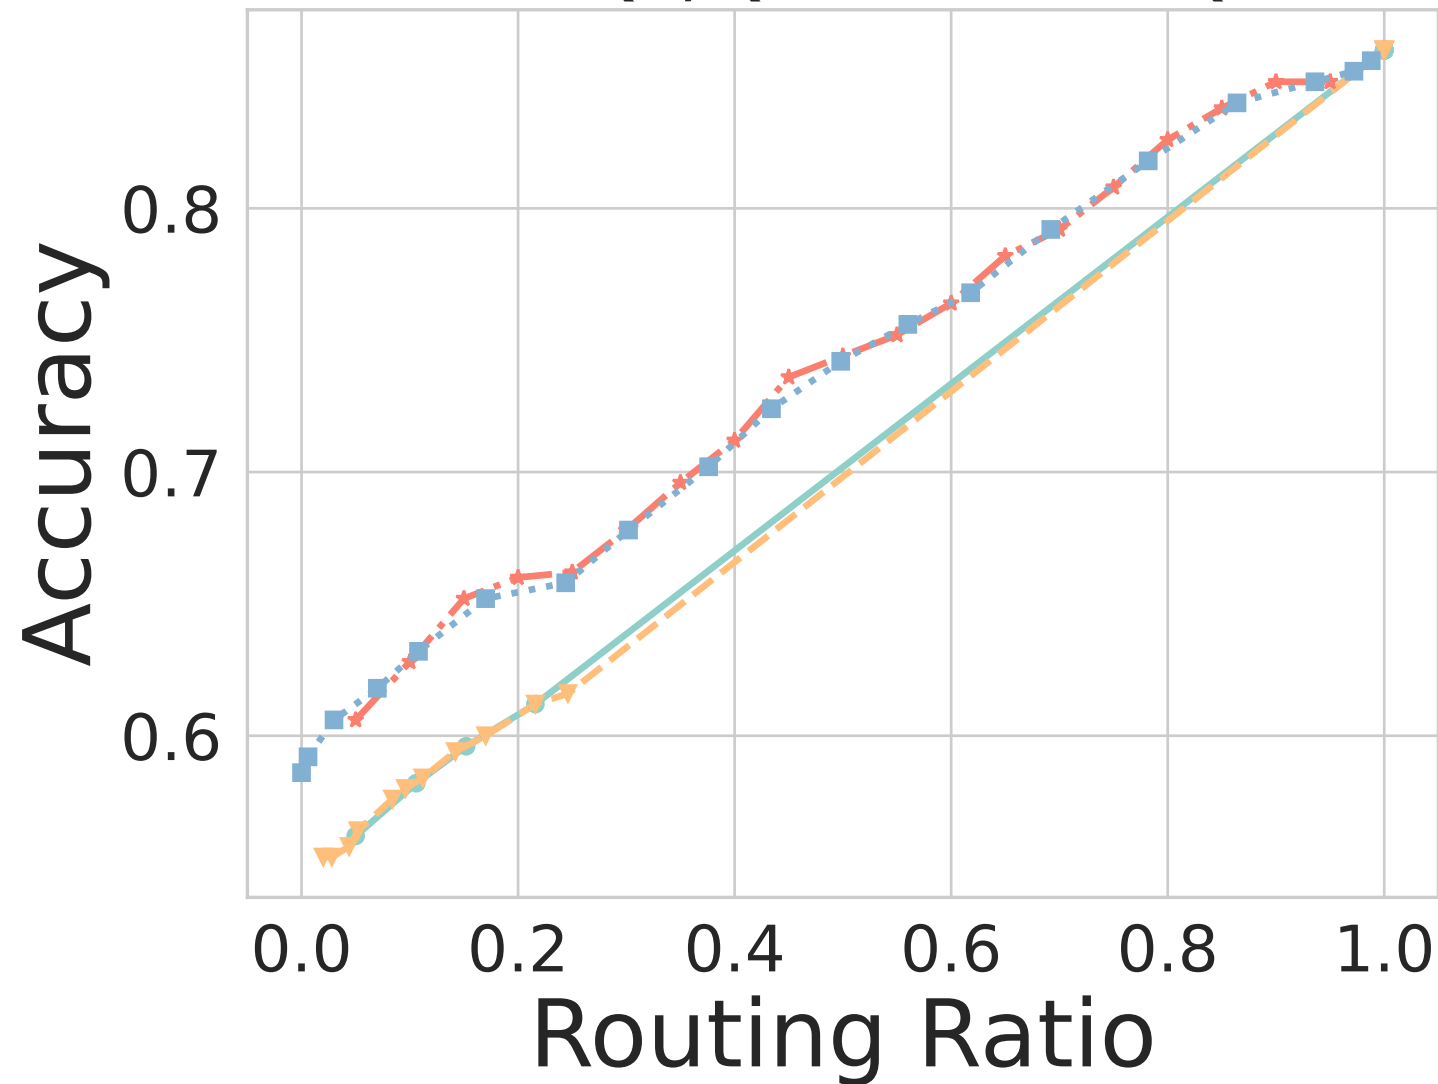

Supplement: supplementary_material [file cali_down_commonsense_qa_Qwen3-0.6B_Qwen_Qwen3-32B.pdf › Routing_SLM_LLMs/Proxy_routing_prediction/to_Qwen_Qwen3-32B/commonsense_qa_as_downstream/cali_down_commonsense_qa_Qwen3-0.6B_Qwen_Qwen3-32B.pdf]

**CommonsenseQA, Qwen3-1.7B to Qwen3-32B**

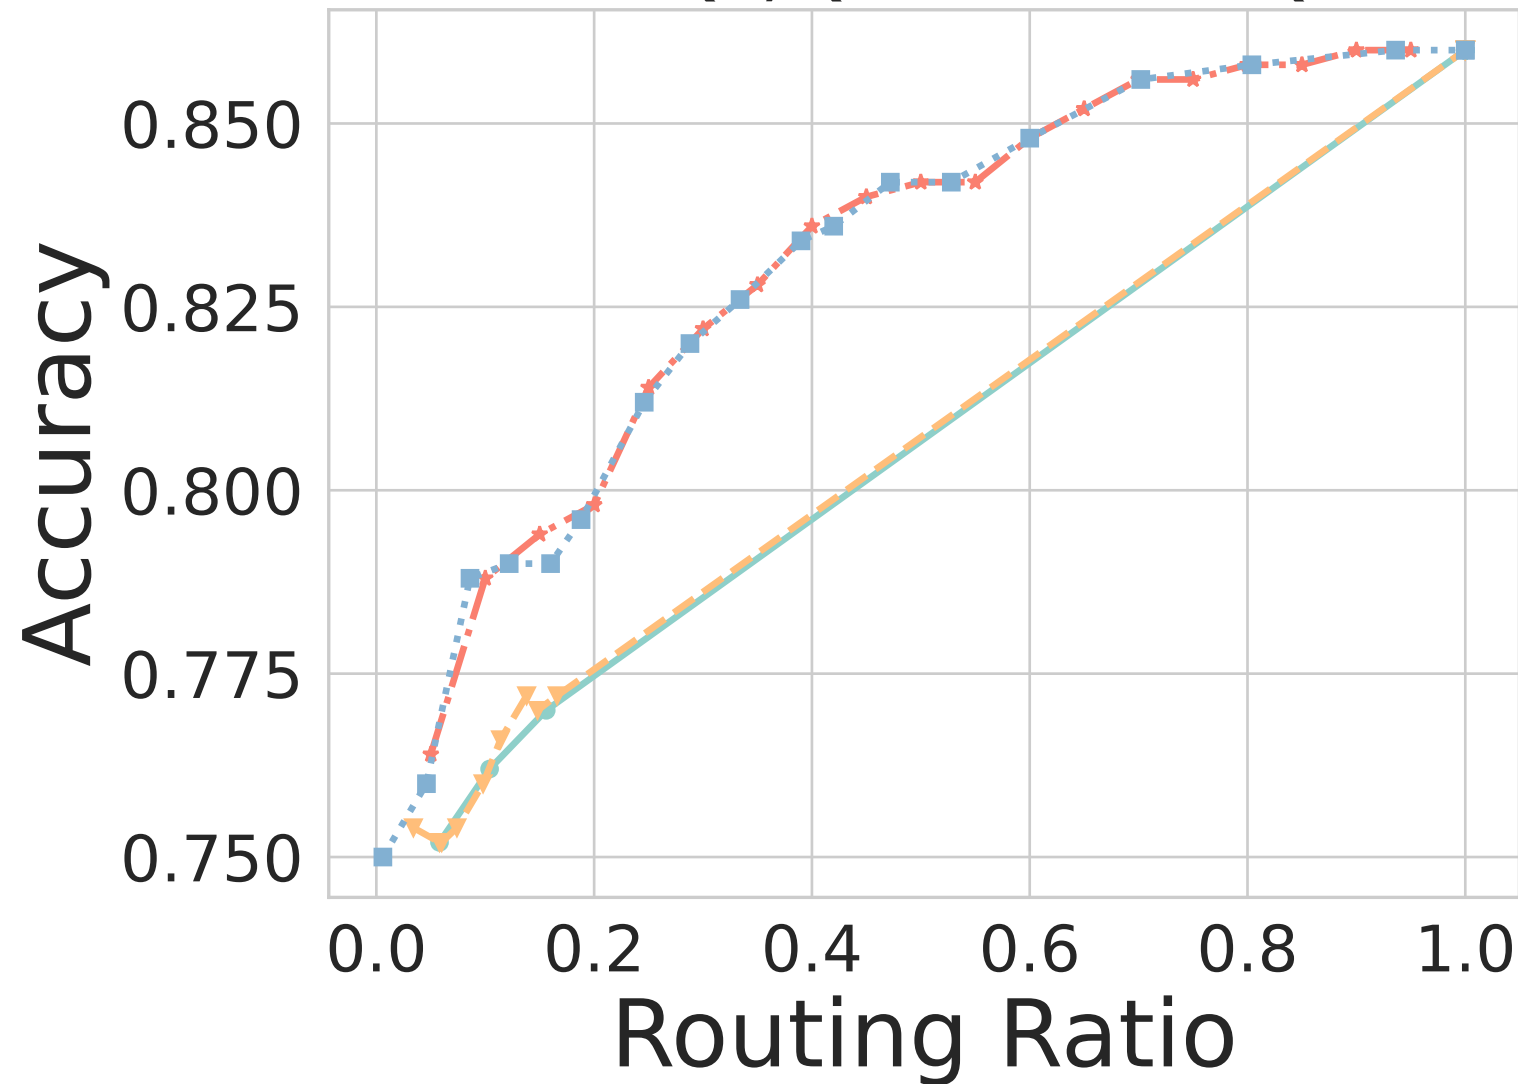

Supplement: supplementary_material [file cali_down_commonsense_qa_Qwen3-1.7B_Qwen_Qwen3-32B.pdf › Routing_SLM_LLMs/Proxy_routing_prediction/to_Qwen_Qwen3-32B/commonsense_qa_as_downstream/cali_down_commonsense_qa_Qwen3-1.7B_Qwen_Qwen3-32B.pdf]

**CommonsenseQA, Qwen3-4B to Qwen3-32B**

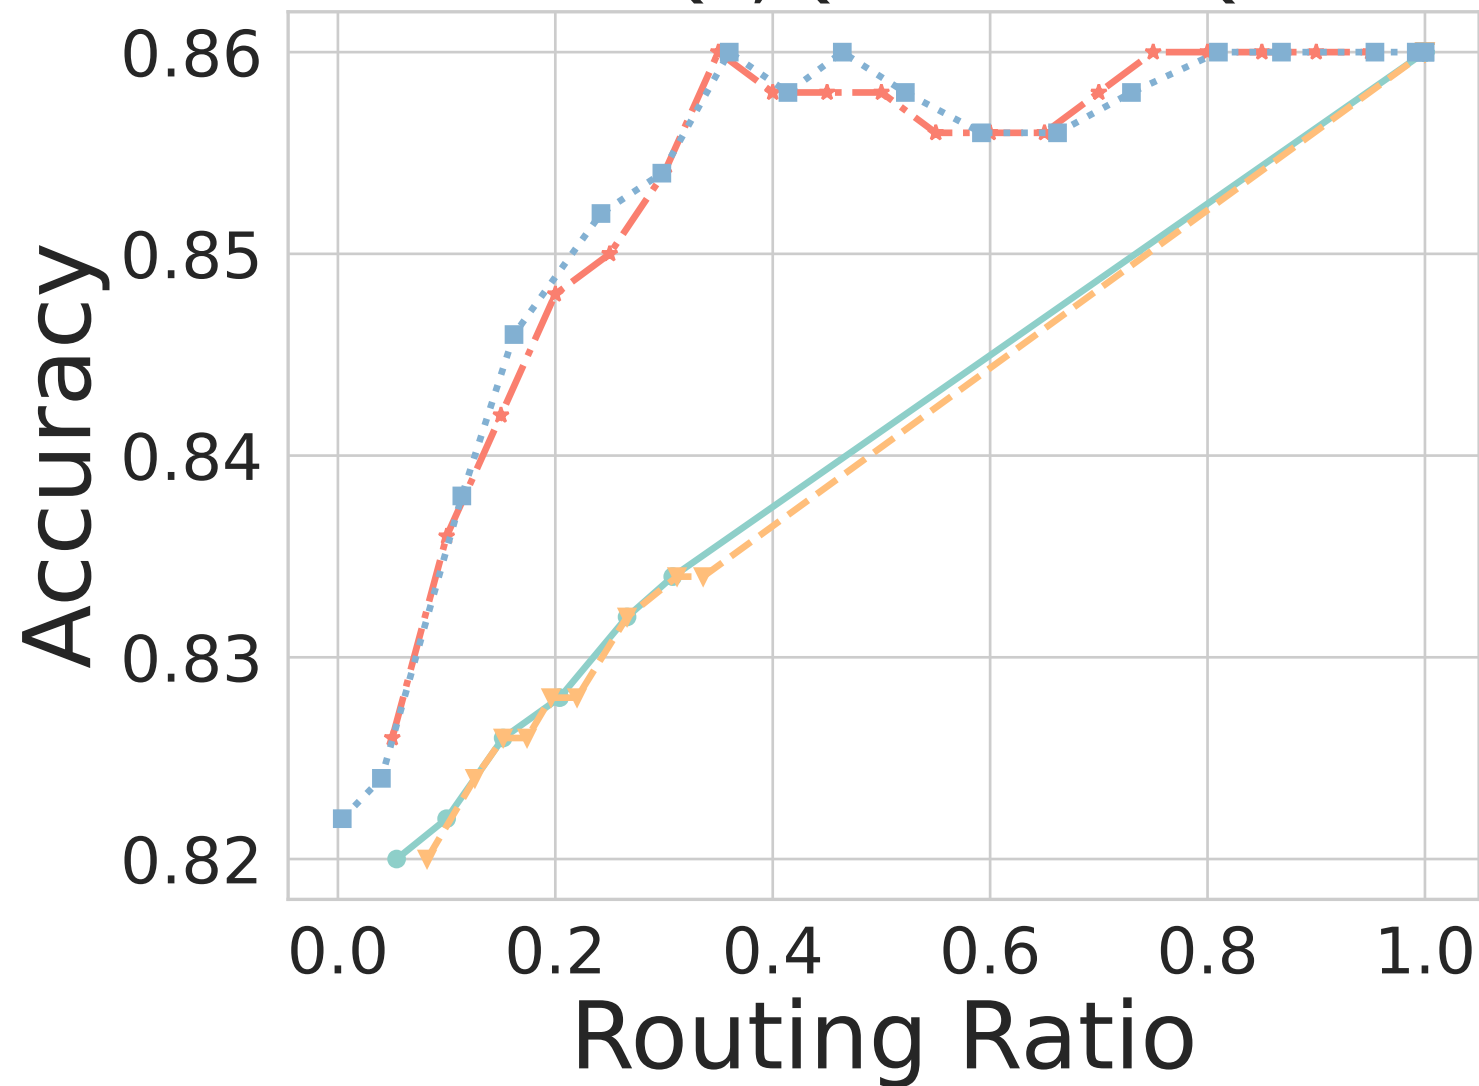

Supplement: supplementary_material [file cali_down_commonsense_qa_Qwen3-4B_Qwen_Qwen3-32B.pdf › Routing_SLM_LLMs/Proxy_routing_prediction/to_Qwen_Qwen3-32B/commonsense_qa_as_downstream/cali_down_commonsense_qa_Qwen3-4B_Qwen_Qwen3-32B.pdf]

**CommonsenseQA, granite-3.1-8b to Qwen3-32B**

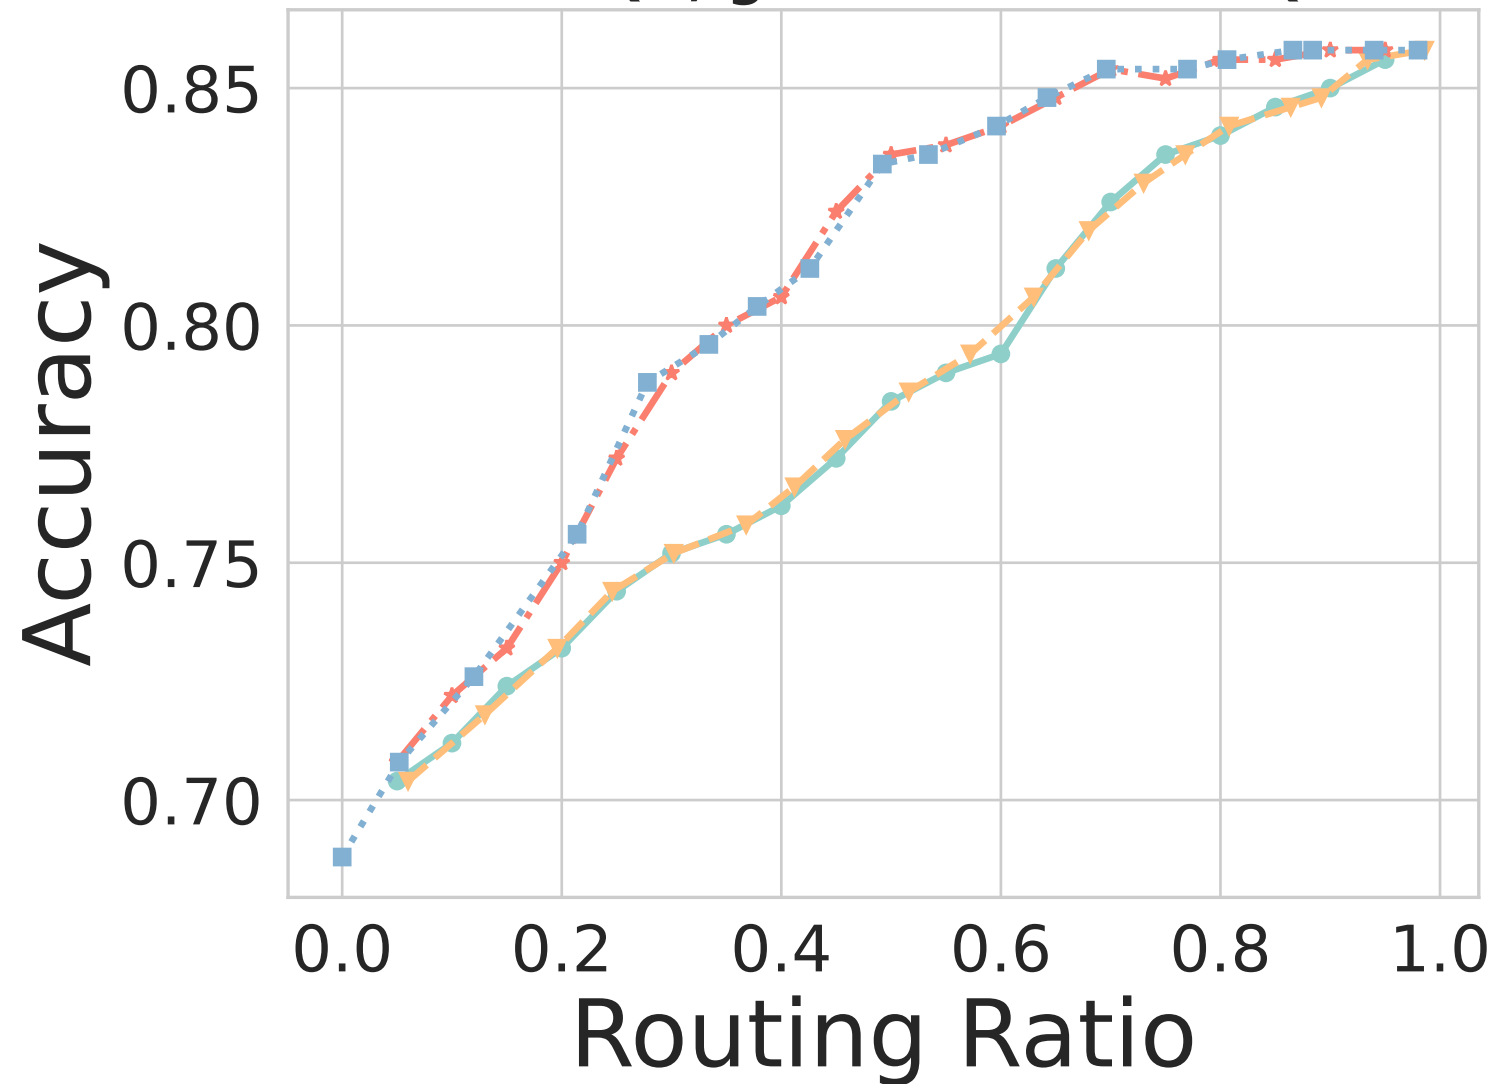

Supplement: supplementary_material [file cali_down_commonsense_qa_granite-3.1-8b_Qwen_Qwen3-32B.pdf › Routing_SLM_LLMs/Proxy_routing_prediction/to_Qwen_Qwen3-32B/commonsense_qa_as_downstream/cali_down_commonsense_qa_granite-3.1-8b_Qwen_Qwen3-32B.pdf]

**CommonsenseQA, llama-3.1-8b to Qwen3-32B**

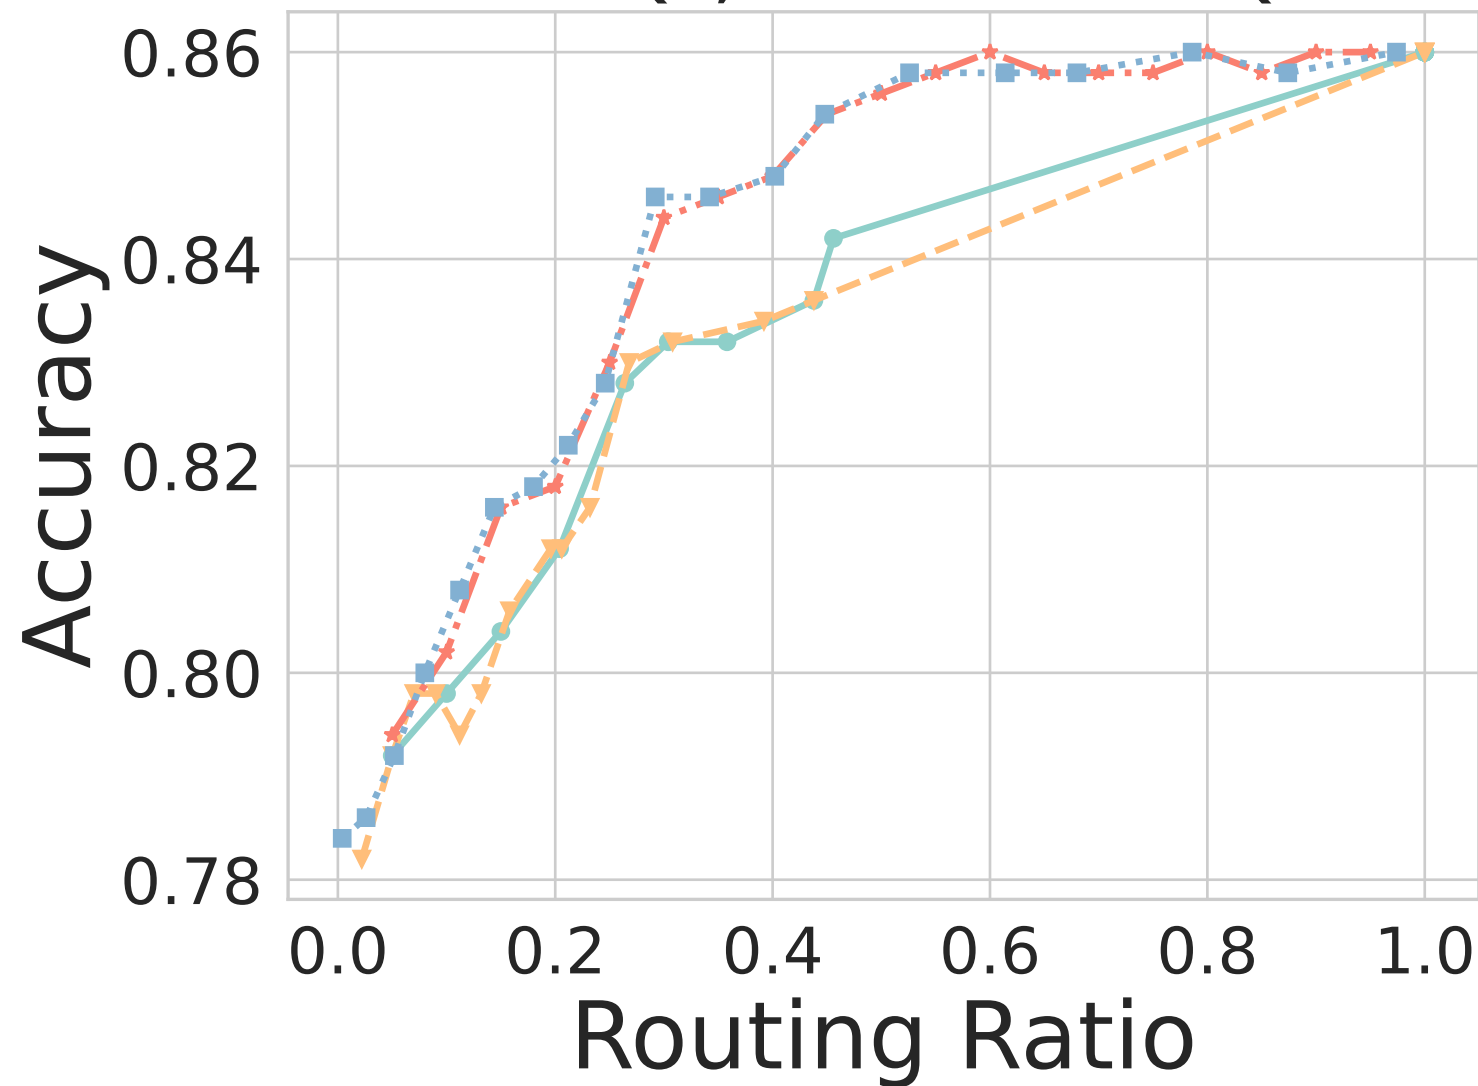

Supplement: supplementary_material [file cali_down_commonsense_qa_llama-3.1-8b_Qwen_Qwen3-32B.pdf › Routing_SLM_LLMs/Proxy_routing_prediction/to_Qwen_Qwen3-32B/commonsense_qa_as_downstream/cali_down_commonsense_qa_llama-3.1-8b_Qwen_Qwen3-32B.pdf]

**CommonsenseQA, llama-3.2-1b to Qwen3-32B**

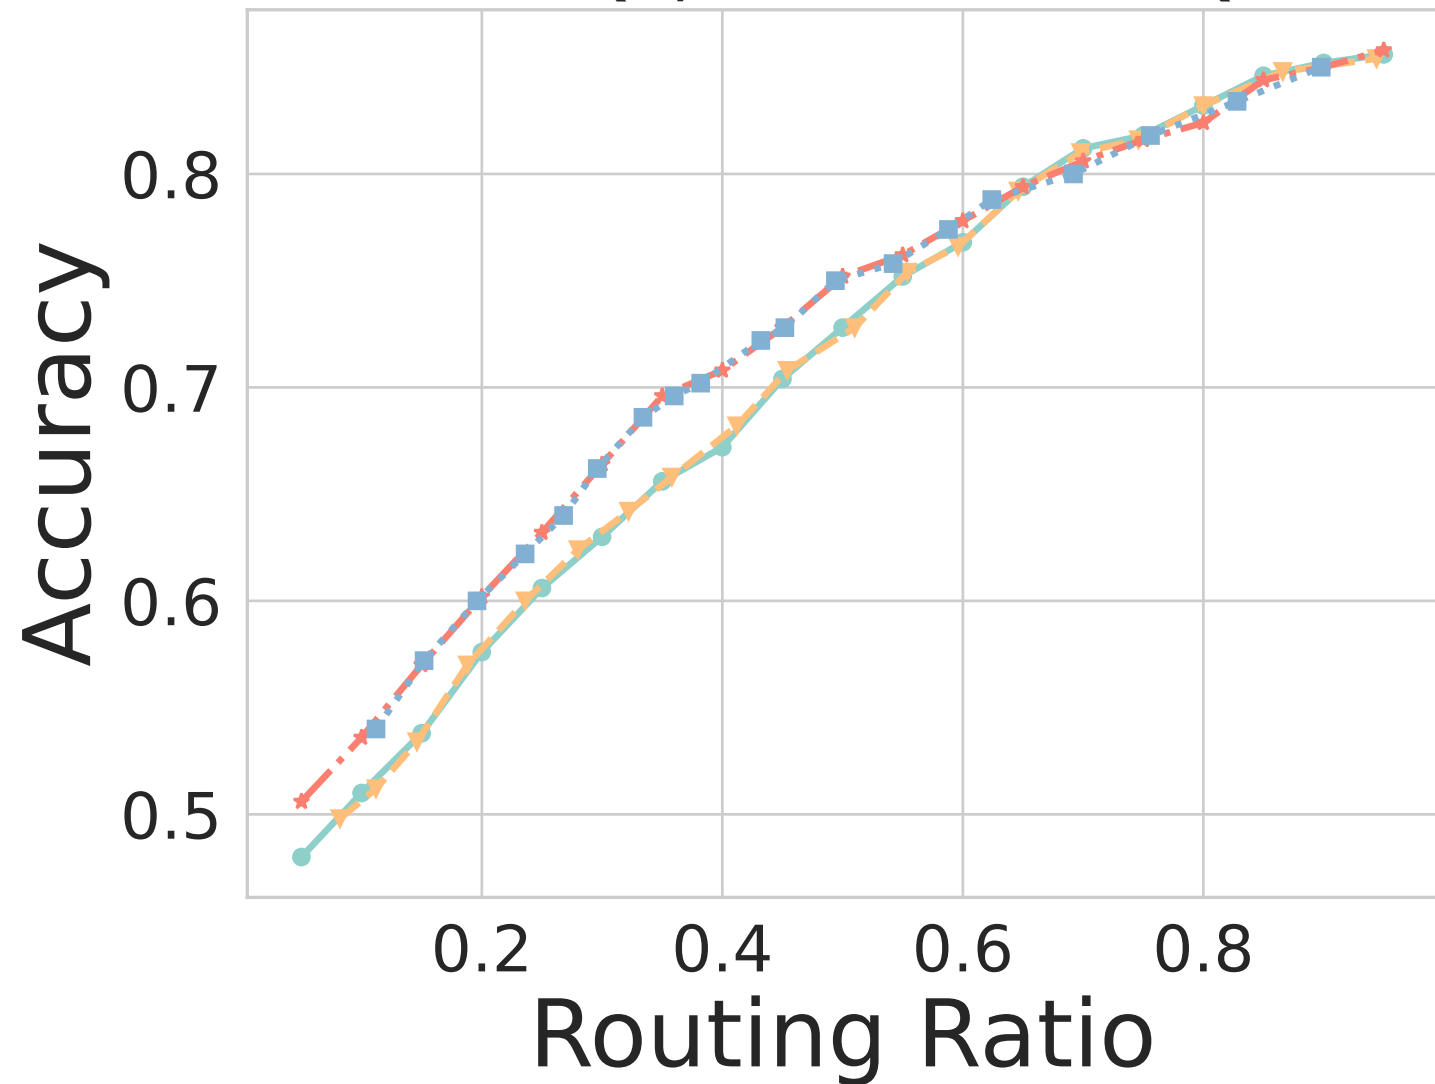

Supplement: supplementary_material [file cali_down_commonsense_qa_llama-3.2-1b_Qwen_Qwen3-32B.pdf › Routing_SLM_LLMs/Proxy_routing_prediction/to_Qwen_Qwen3-32B/commonsense_qa_as_downstream/cali_down_commonsense_qa_llama-3.2-1b_Qwen_Qwen3-32B.pdf]

**CommonsenseQA, llama-3.2-3b to Qwen3-32B**

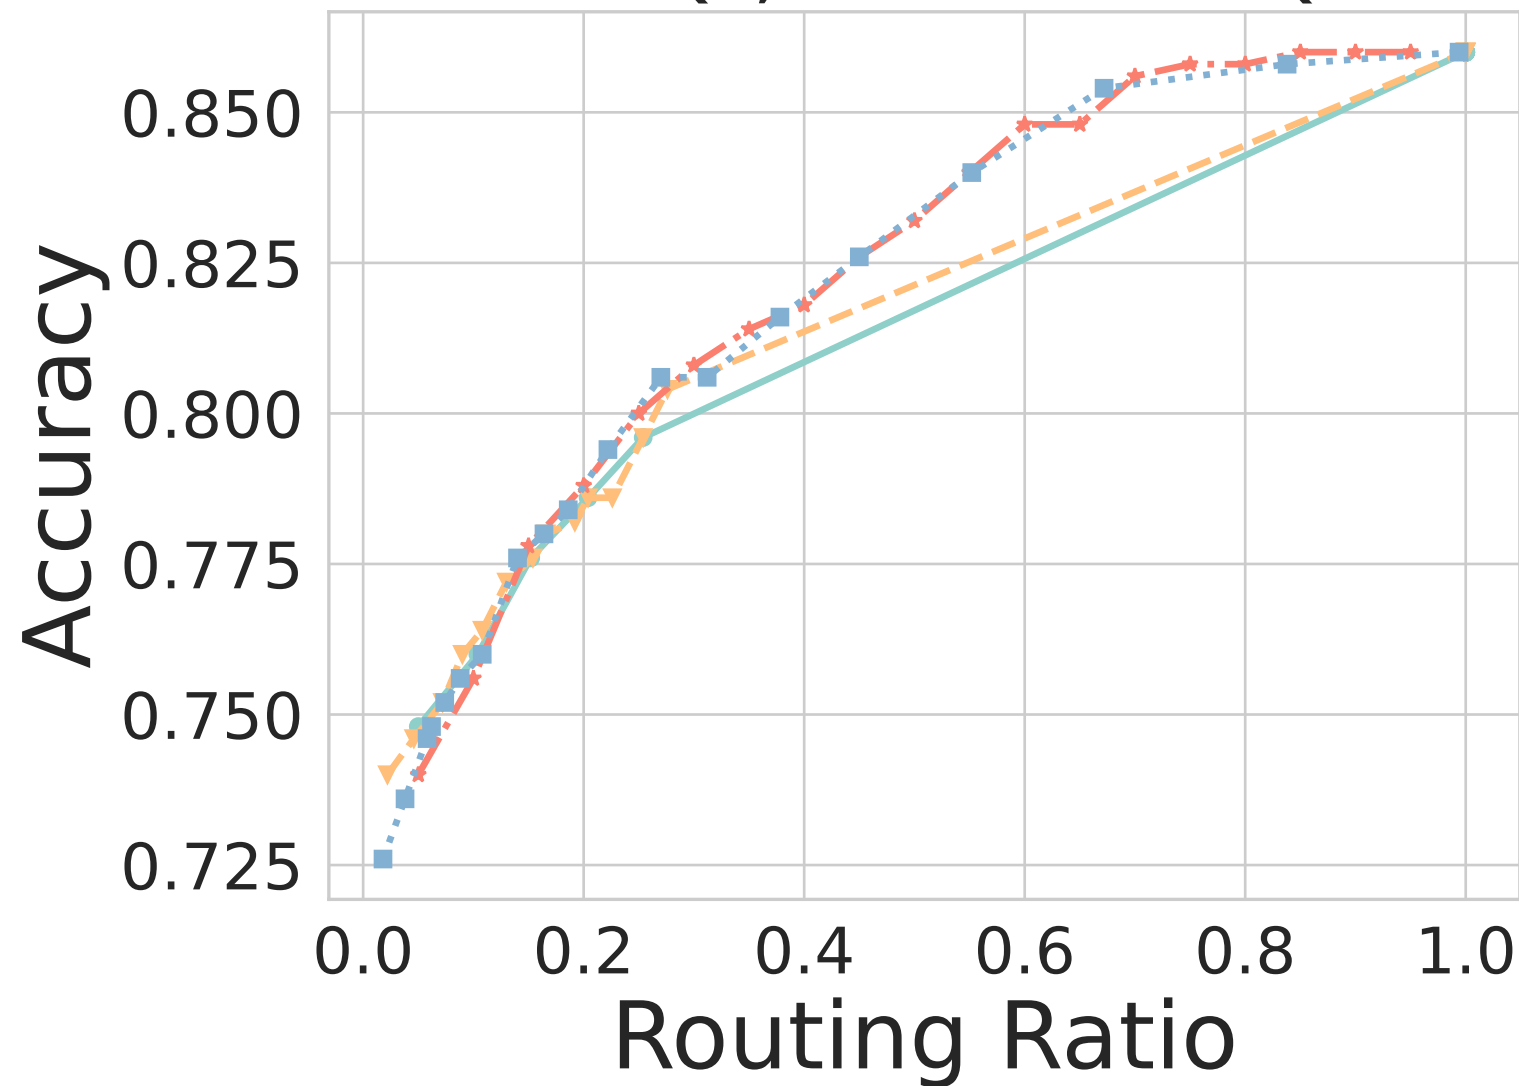

Supplement: supplementary_material [file cali_down_commonsense_qa_llama-3.2-3b_Qwen_Qwen3-32B.pdf › Routing_SLM_LLMs/Proxy_routing_prediction/to_Qwen_Qwen3-32B/commonsense_qa_as_downstream/cali_down_commonsense_qa_llama-3.2-3b_Qwen_Qwen3-32B.pdf]

**CommonsenseQA, mistral-7b to Qwen3-32B**

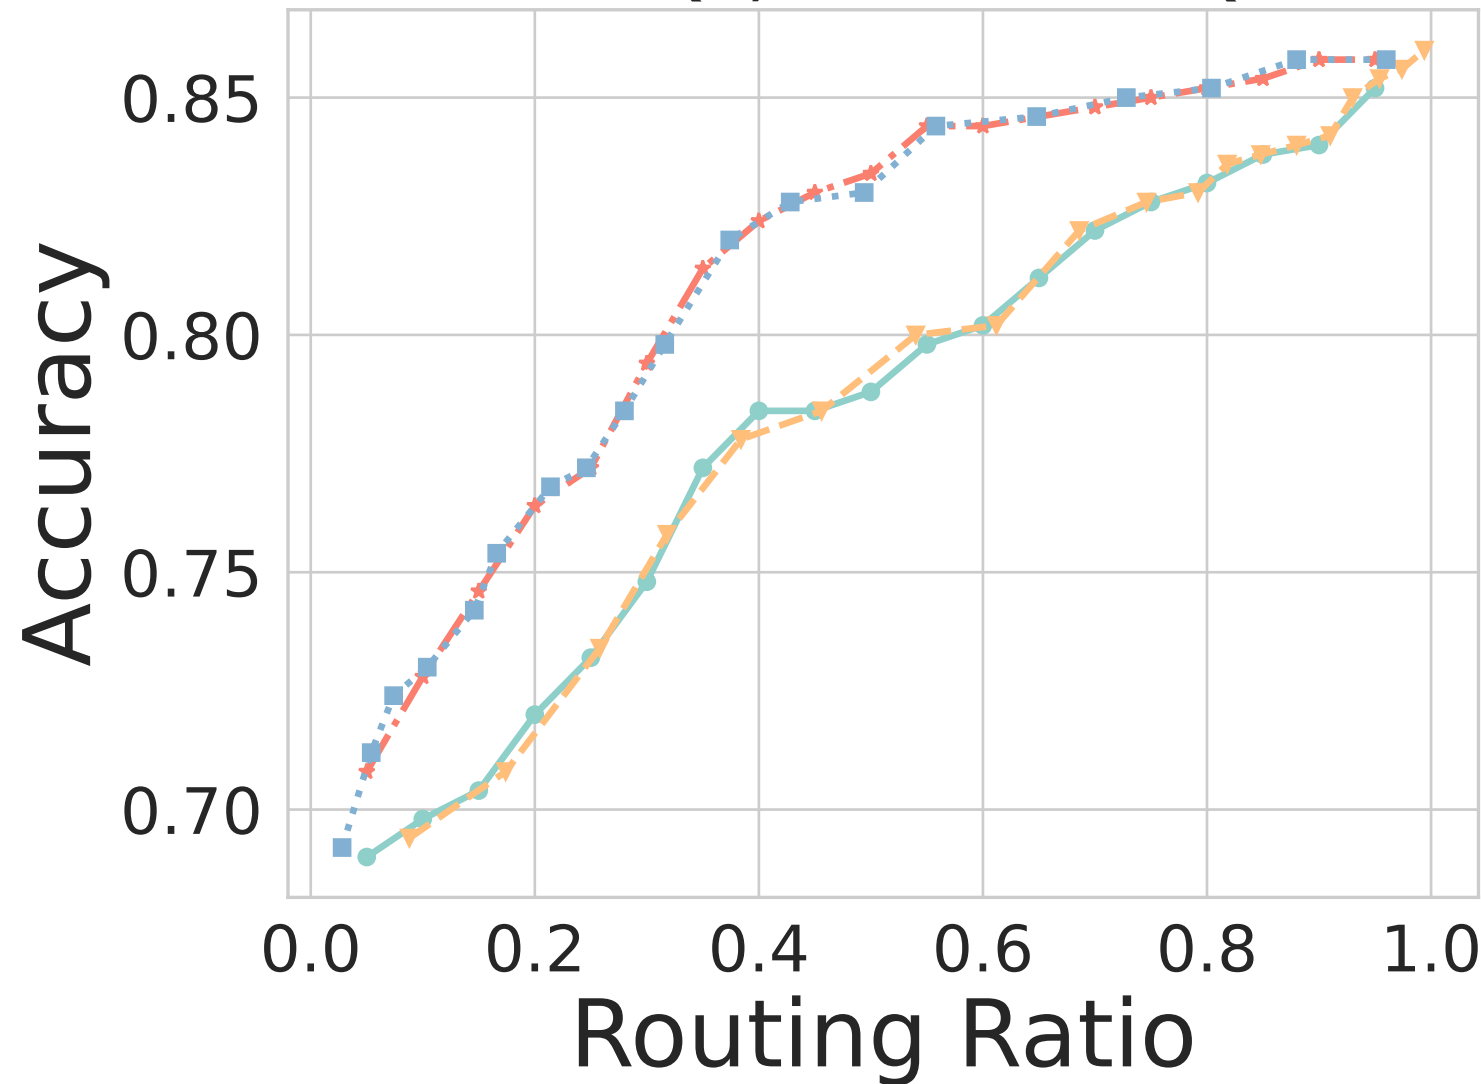

Supplement: supplementary_material [file cali_down_commonsense_qa_mistral-7b_Qwen_Qwen3-32B.pdf › Routing_SLM_LLMs/Proxy_routing_prediction/to_Qwen_Qwen3-32B/commonsense_qa_as_downstream/cali_down_commonsense_qa_mistral-7b_Qwen_Qwen3-32B.pdf]

**CommonsenseQA, phi-3.5-mini to Qwen3-32B**

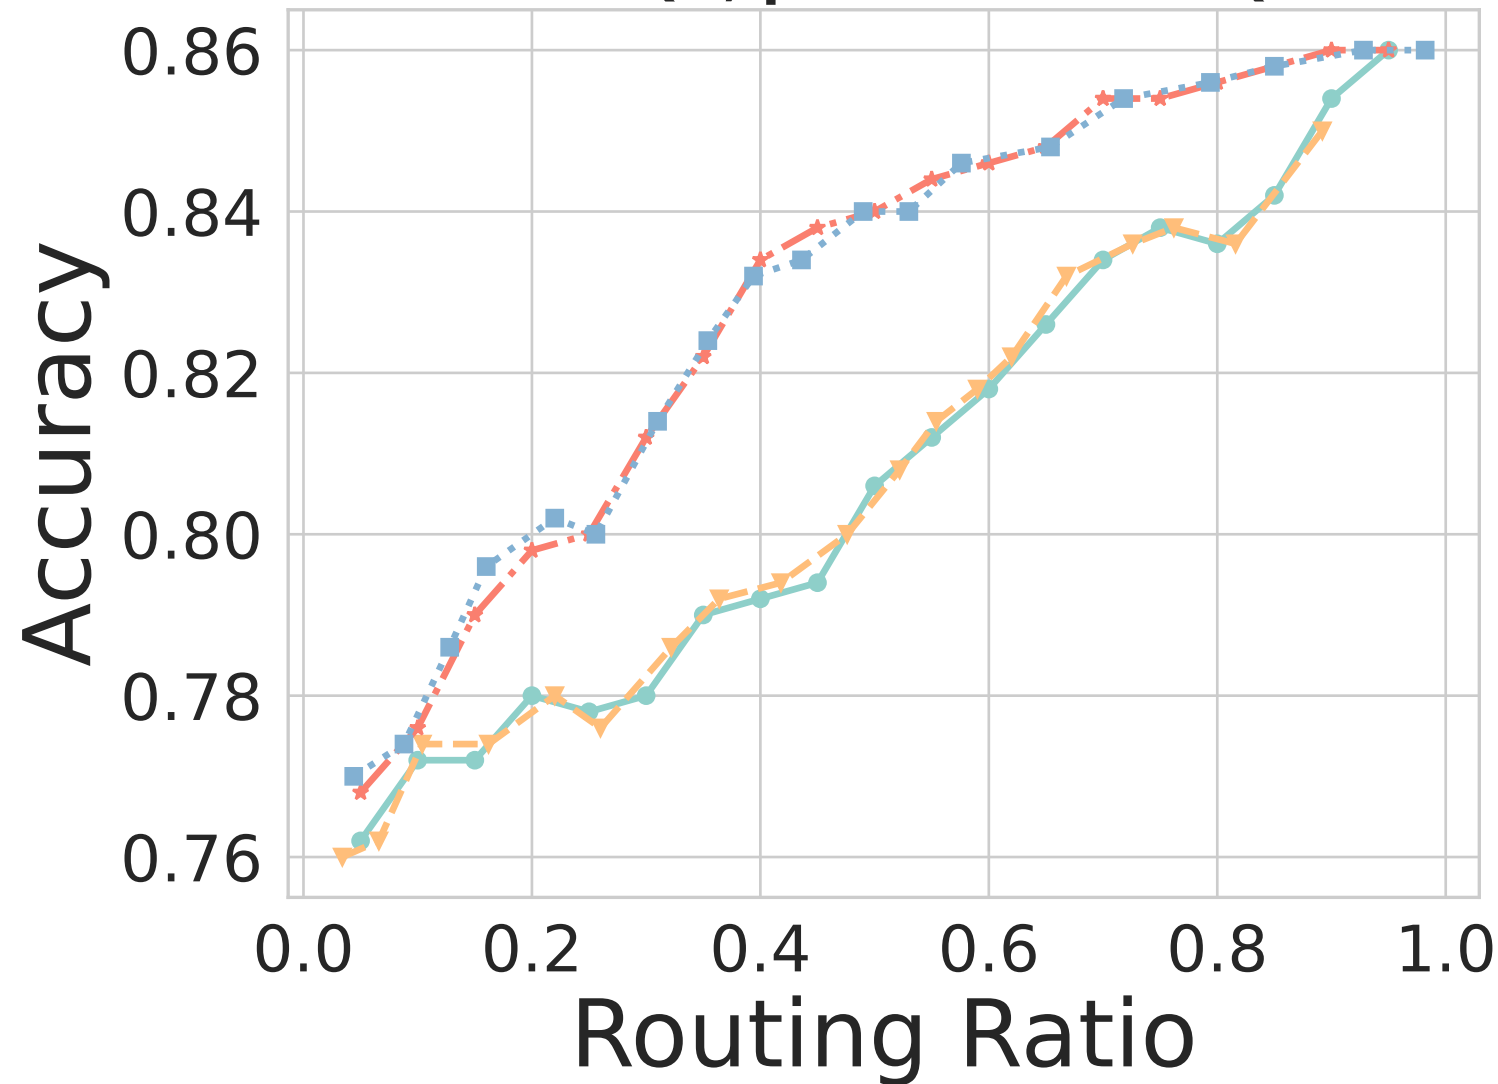

Supplement: supplementary_material [file cali_down_commonsense_qa_phi-3.5-mini_Qwen_Qwen3-32B.pdf › Routing_SLM_LLMs/Proxy_routing_prediction/to_Qwen_Qwen3-32B/commonsense_qa_as_downstream/cali_down_commonsense_qa_phi-3.5-mini_Qwen_Qwen3-32B.pdf]

# CommonsenseQA, phi-4-mini-reasoning to Qwen3-32B

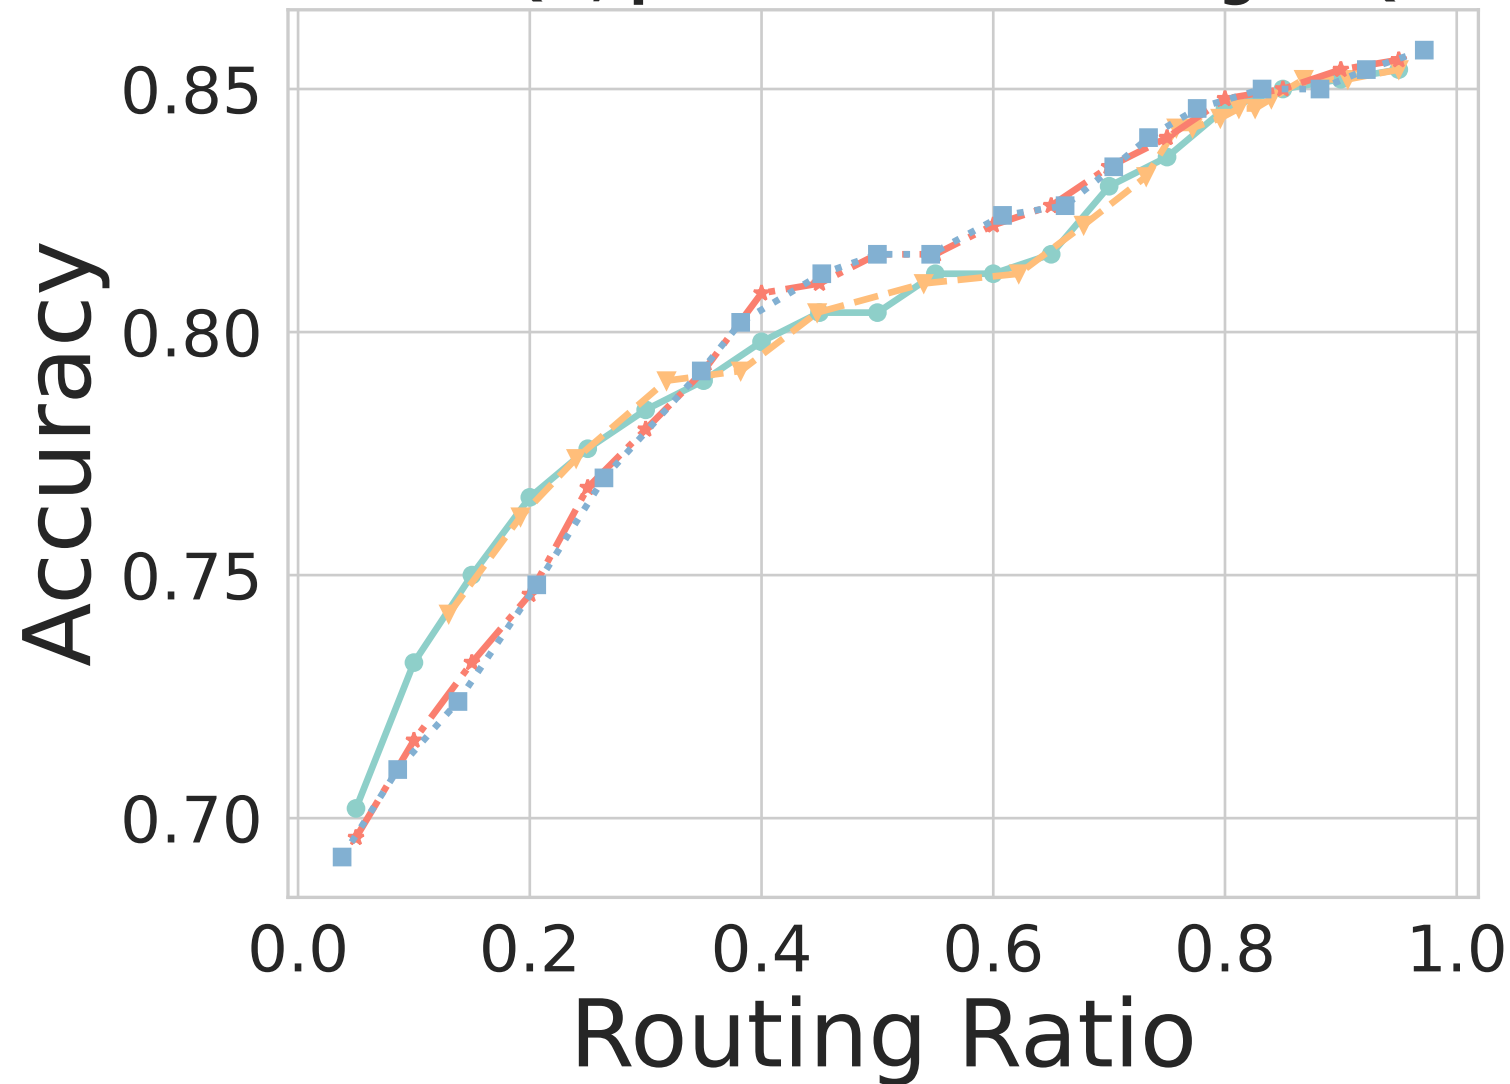

Supplement: supplementary_material [file cali_down_commonsense_qa_phi-4-mini-reasoning_Qwen_Qwen3-32B.pdf › Routing_SLM_LLMs/Proxy_routing_prediction/to_Qwen_Qwen3-32B/commonsense_qa_as_downstream/cali_down_commonsense_qa_phi-4-mini-reasoning_Qwen_Qwen3-32B.pdf]

CommonsenseQA, qwen-2.5-7b to Qwen3-32B

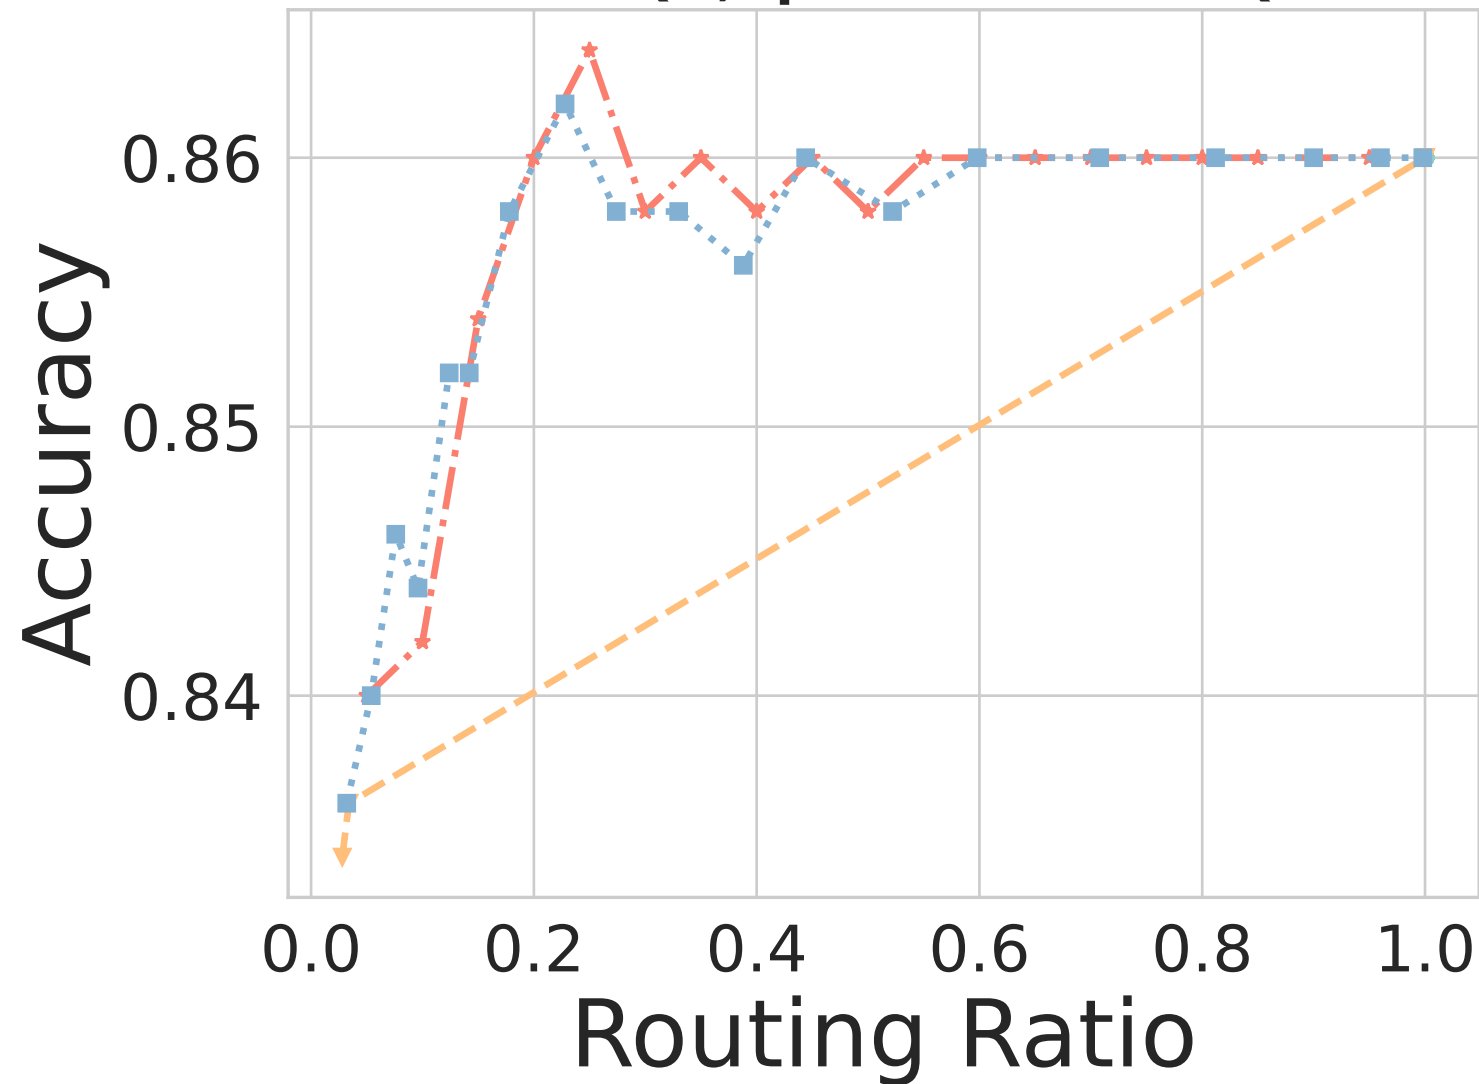

Supplement: supplementary_material [file cali_down_commonsense_qa_qwen-2.5-7b_Qwen_Qwen3-32B.pdf › Routing_SLM_LLMs/Proxy_routing_prediction/to_Qwen_Qwen3-32B/commonsense_qa_as_downstream/cali_down_commonsense_qa_qwen-2.5-7b_Qwen_Qwen3-32B.pdf]

**CommonsenseQA, rwkv to Qwen3-32B**

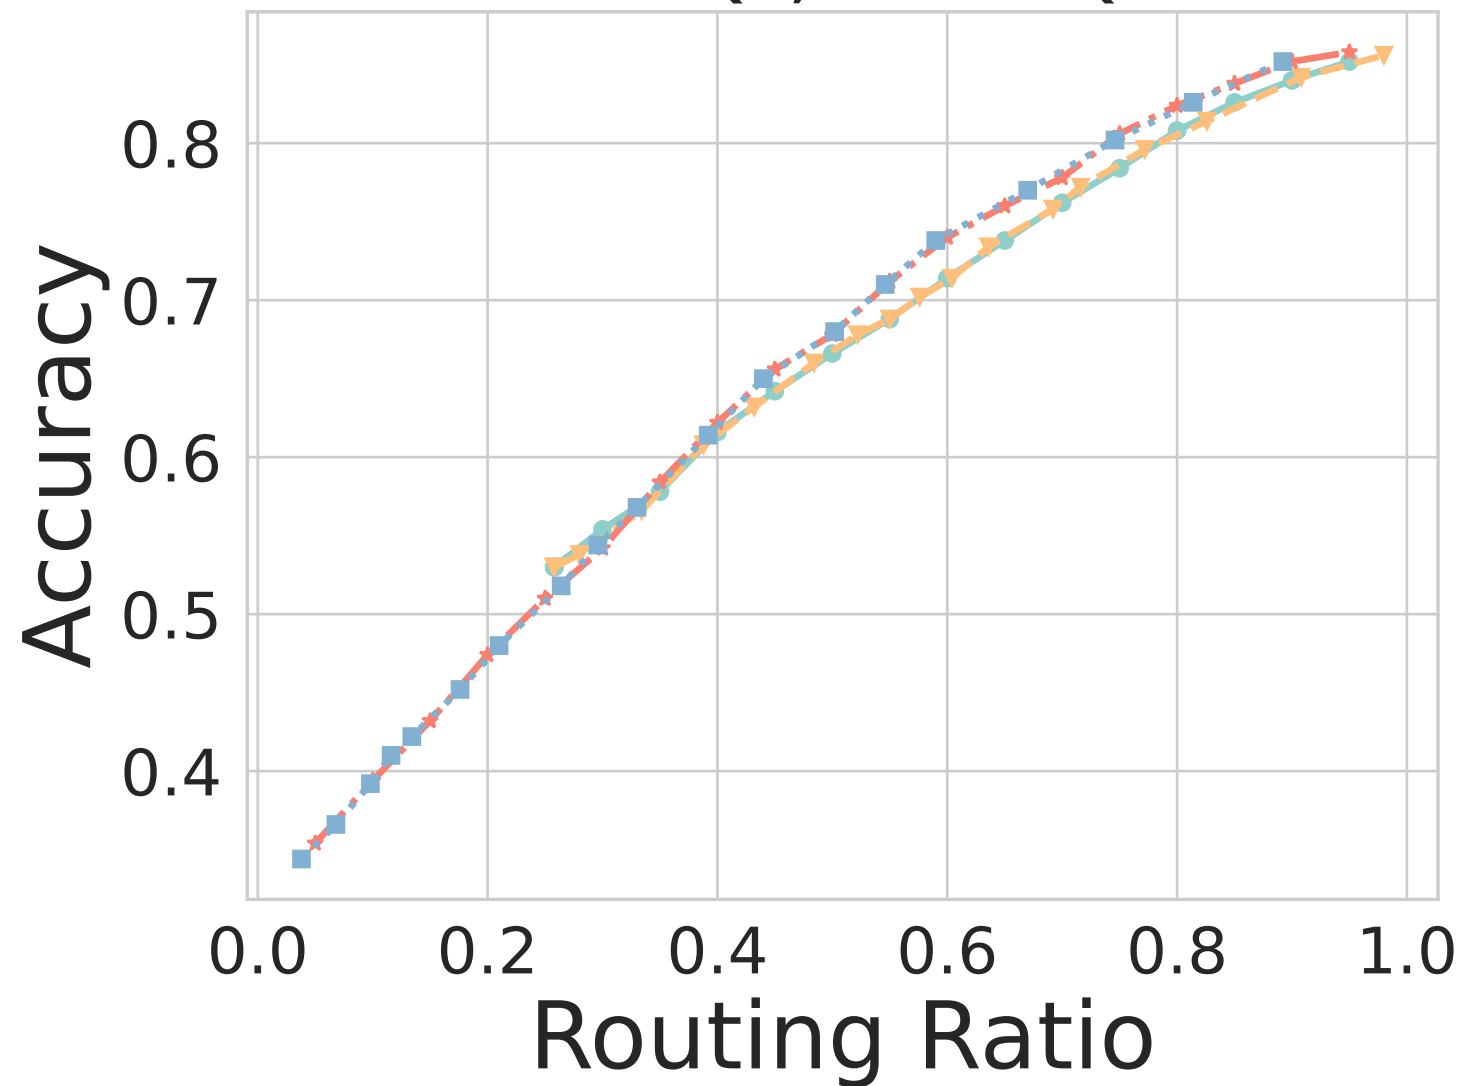

Supplement: supplementary_material [file cali_down_commonsense_qa_rwkv_Qwen_Qwen3-32B.pdf › Routing_SLM_LLMs/Proxy_routing_prediction/to_Qwen_Qwen3-32B/commonsense_qa_as_downstream/cali_down_commonsense_qa_rwkv_Qwen_Qwen3-32B.pdf]

**GSM8K, Qwen3-0.6B to Qwen3-32B**

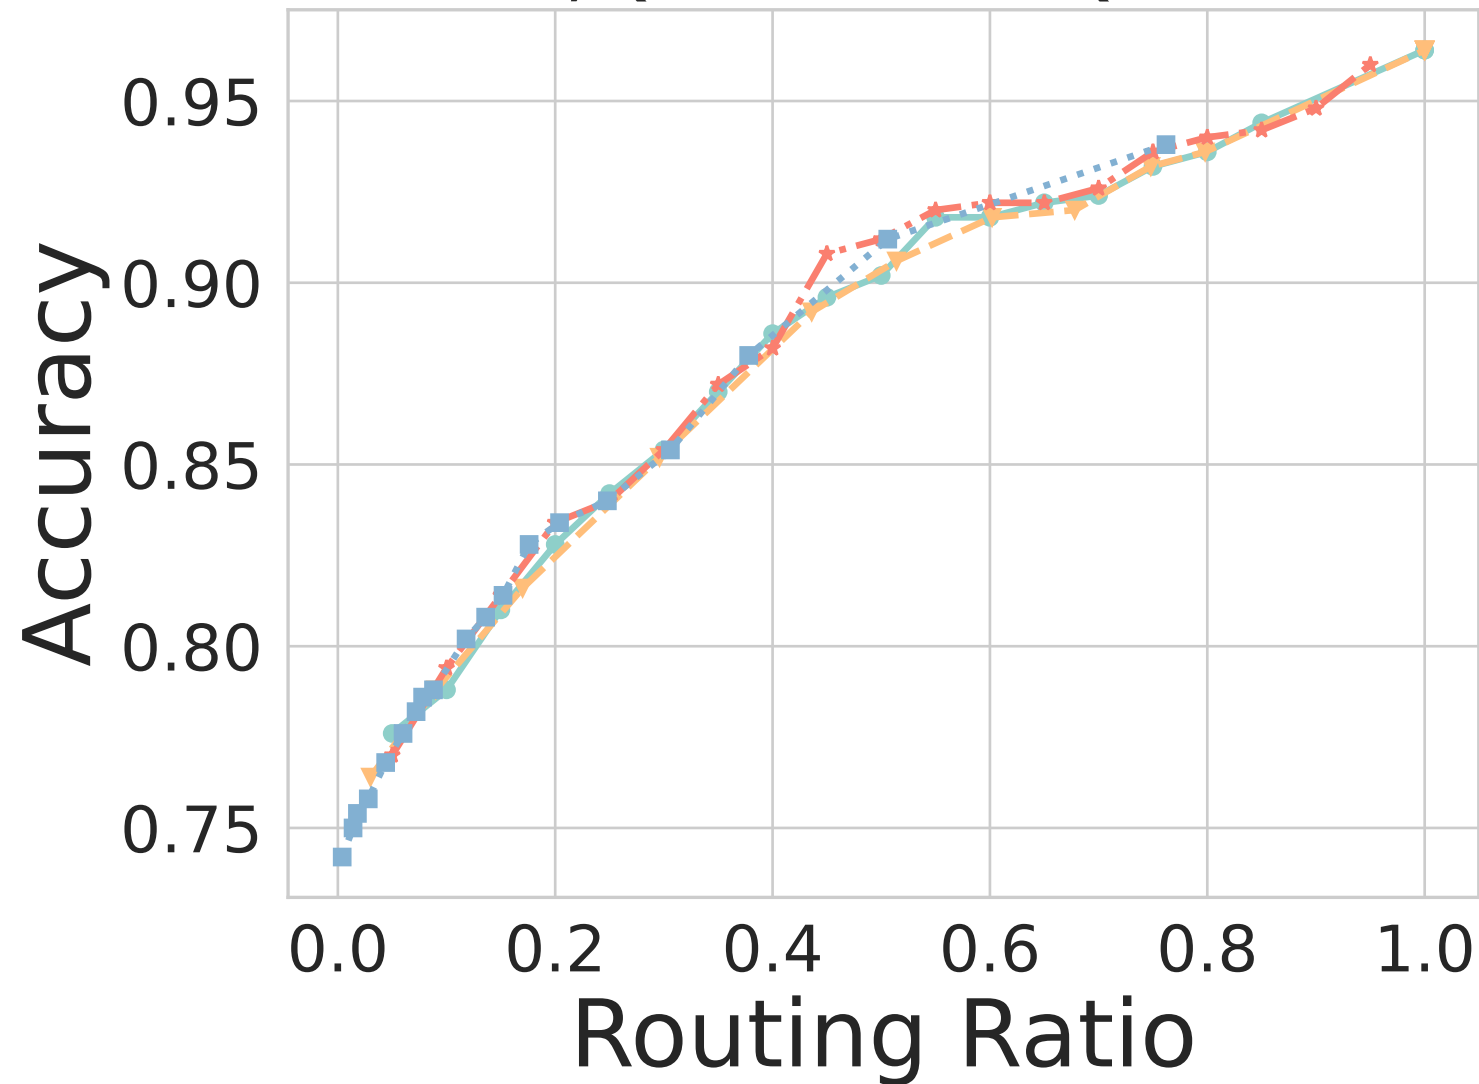

Supplement: supplementary_material [file cali_down_gsm8k_Qwen3-0.6B_Qwen_Qwen3-32B.pdf › Routing_SLM_LLMs/Proxy_routing_prediction/to_Qwen_Qwen3-32B/gsm8k_as_downstream/cali_down_gsm8k_Qwen3-0.6B_Qwen_Qwen3-32B.pdf]

**GSM8K, Qwen3-1.7B to Qwen3-32B**

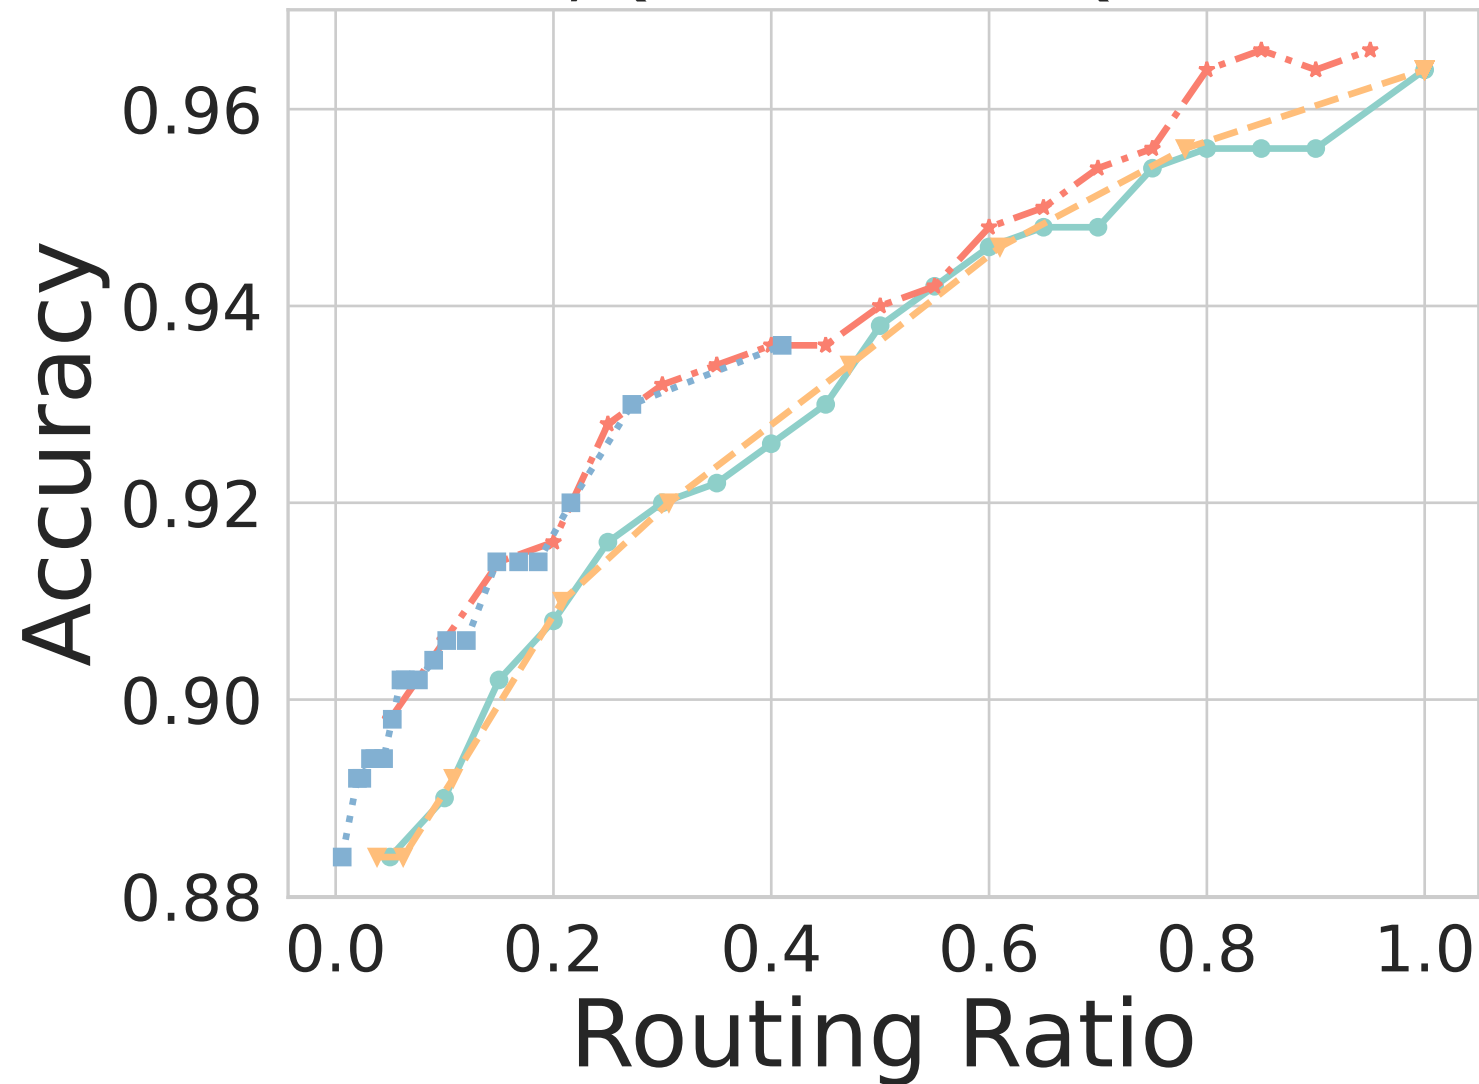

Supplement: supplementary_material [file cali_down_gsm8k_Qwen3-1.7B_Qwen_Qwen3-32B.pdf › Routing_SLM_LLMs/Proxy_routing_prediction/to_Qwen_Qwen3-32B/gsm8k_as_downstream/cali_down_gsm8k_Qwen3-1.7B_Qwen_Qwen3-32B.pdf]

**GSM8K, Qwen3-4B to Qwen3-32B**

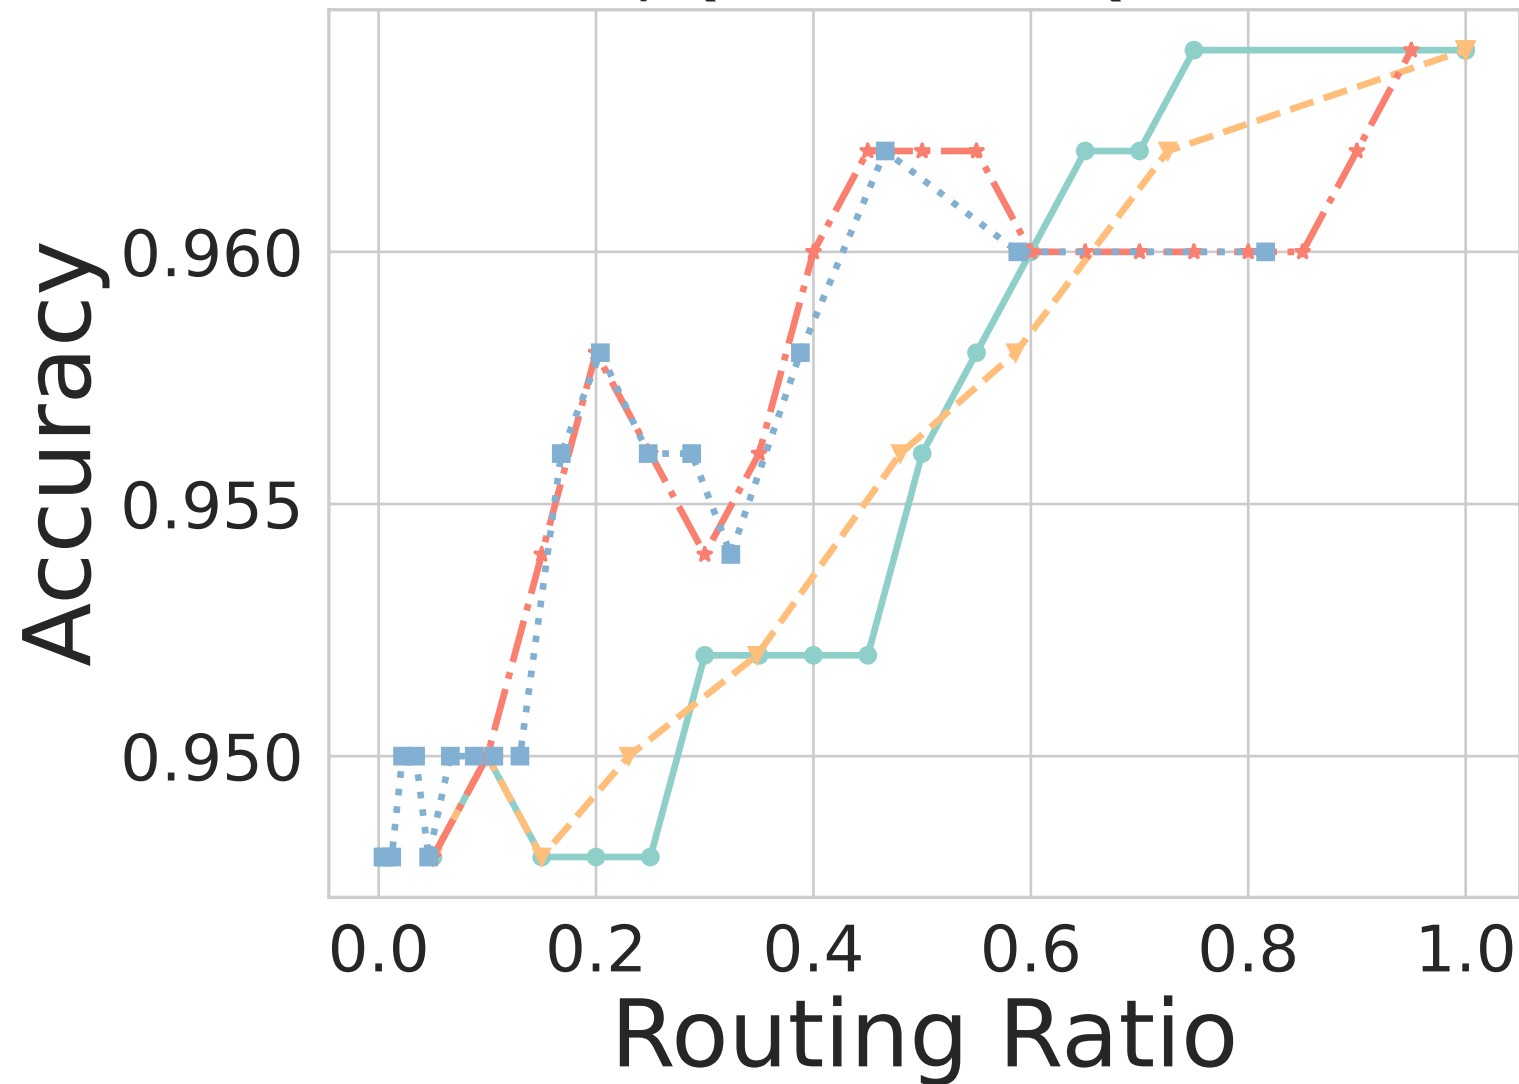

Supplement: supplementary_material [file cali_down_gsm8k_Qwen3-4B_Qwen_Qwen3-32B.pdf › Routing_SLM_LLMs/Proxy_routing_prediction/to_Qwen_Qwen3-32B/gsm8k_as_downstream/cali_down_gsm8k_Qwen3-4B_Qwen_Qwen3-32B.pdf]

**GSM8K, granite-3.1-8b to Qwen3-32B**

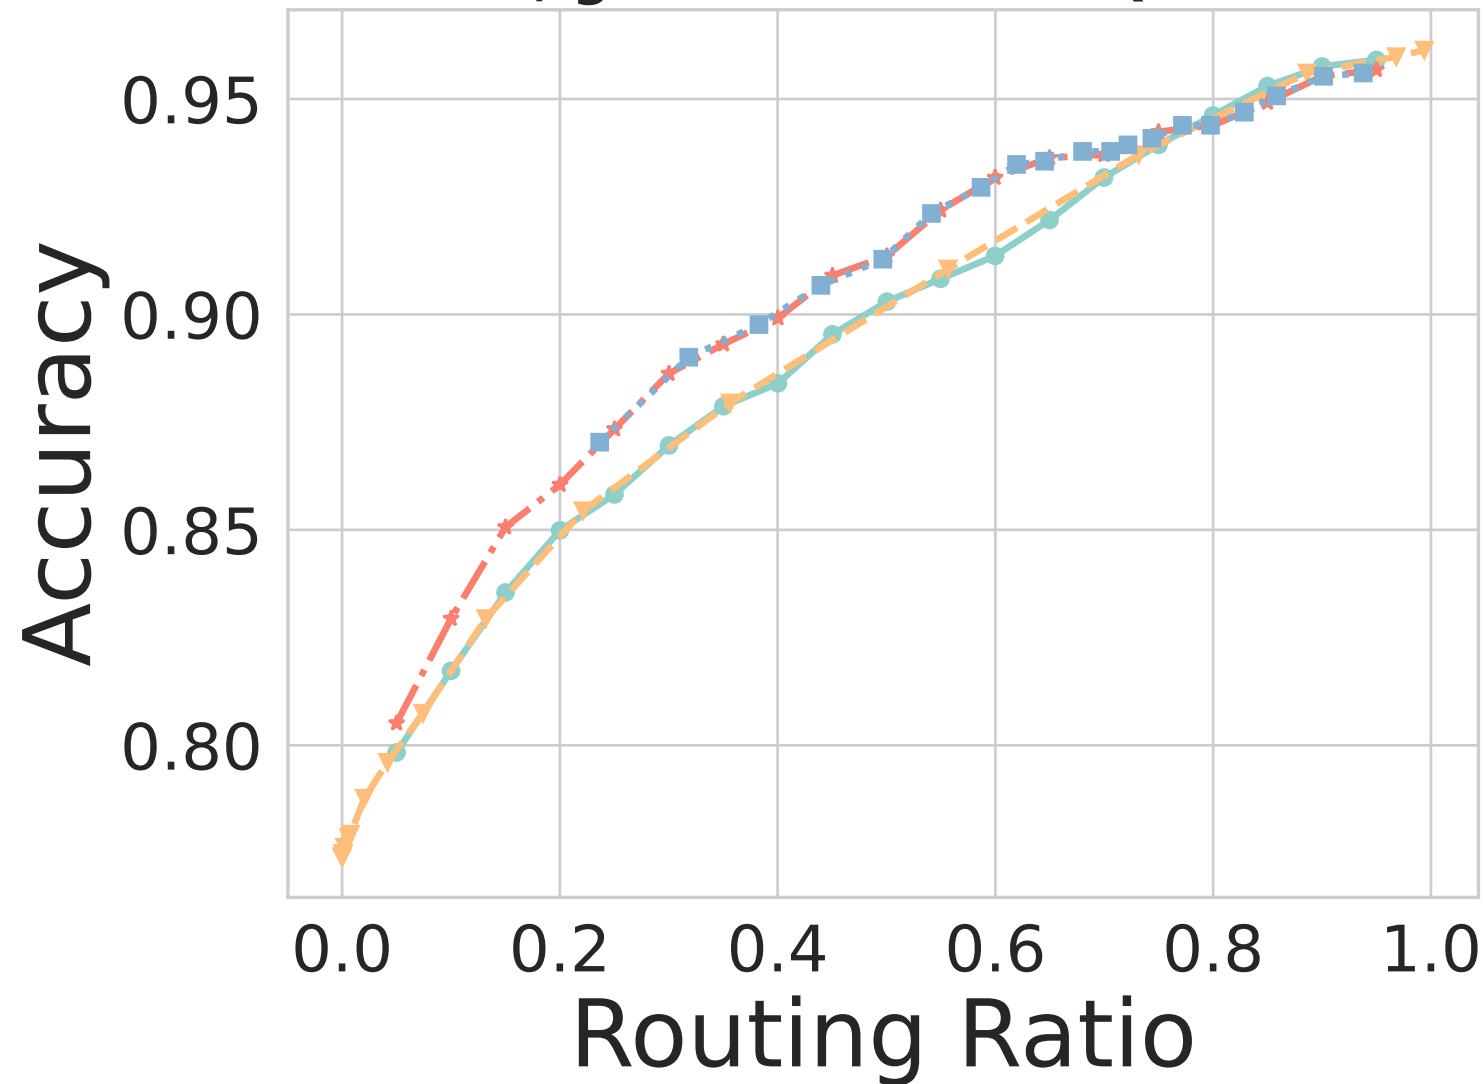

Supplement: supplementary_material [file cali_down_gsm8k_granite-3.1-8b_Qwen_Qwen3-32B.pdf › Routing_SLM_LLMs/Proxy_routing_prediction/to_Qwen_Qwen3-32B/gsm8k_as_downstream/cali_down_gsm8k_granite-3.1-8b_Qwen_Qwen3-32B.pdf]

**GSM8K, llama-3.1-8b to Qwen3-32B**

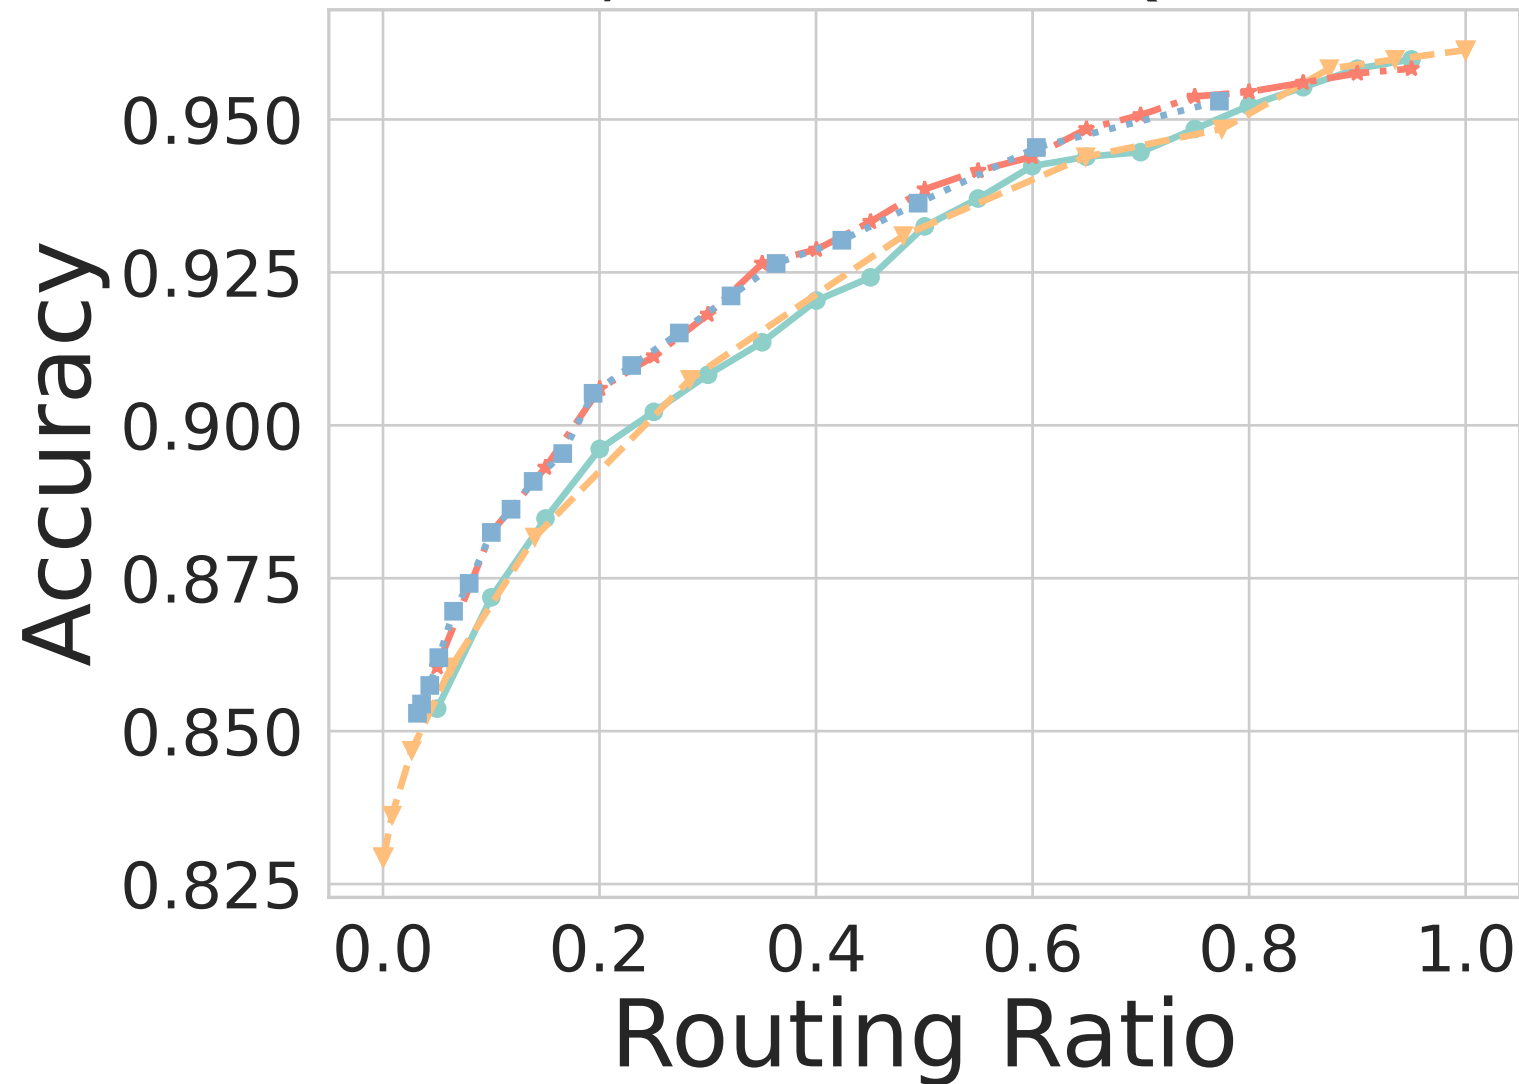

Supplement: supplementary_material [file cali_down_gsm8k_llama-3.1-8b_Qwen_Qwen3-32B.pdf › Routing_SLM_LLMs/Proxy_routing_prediction/to_Qwen_Qwen3-32B/gsm8k_as_downstream/cali_down_gsm8k_llama-3.1-8b_Qwen_Qwen3-32B.pdf]

**GSM8K, llama-3.2-1b to Qwen3-32B**

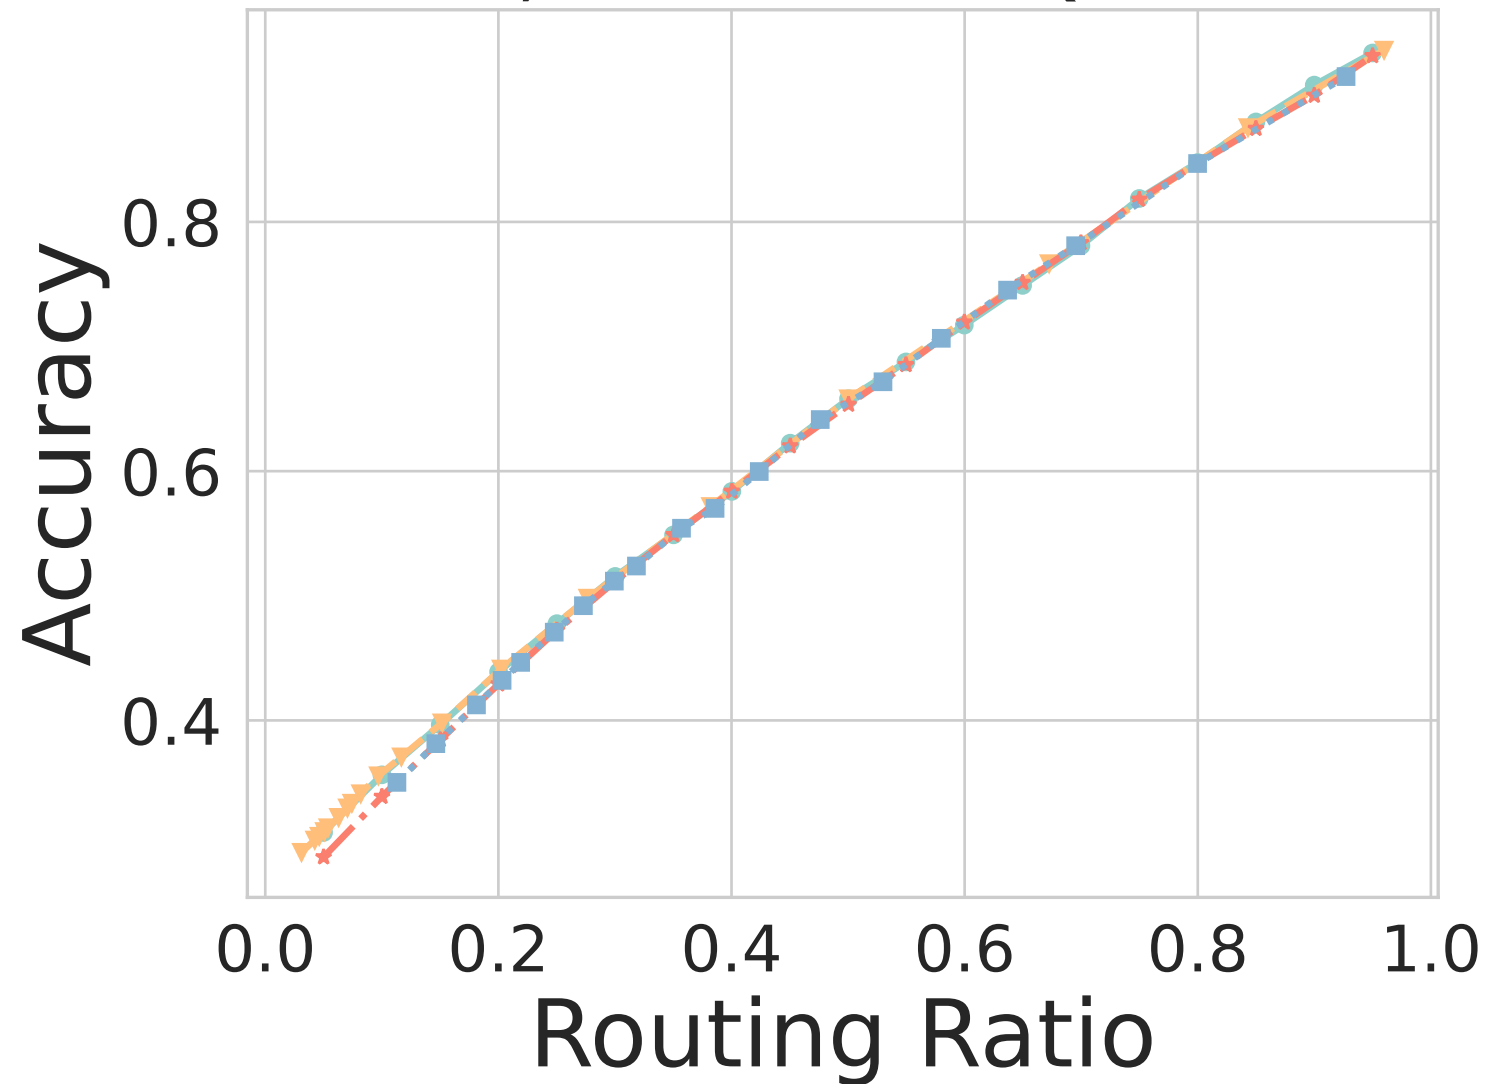

Supplement: supplementary_material [file cali_down_gsm8k_llama-3.2-1b_Qwen_Qwen3-32B.pdf › Routing_SLM_LLMs/Proxy_routing_prediction/to_Qwen_Qwen3-32B/gsm8k_as_downstream/cali_down_gsm8k_llama-3.2-1b_Qwen_Qwen3-32B.pdf]

**GSM8K, llama-3.2-3b to Qwen3-32B**

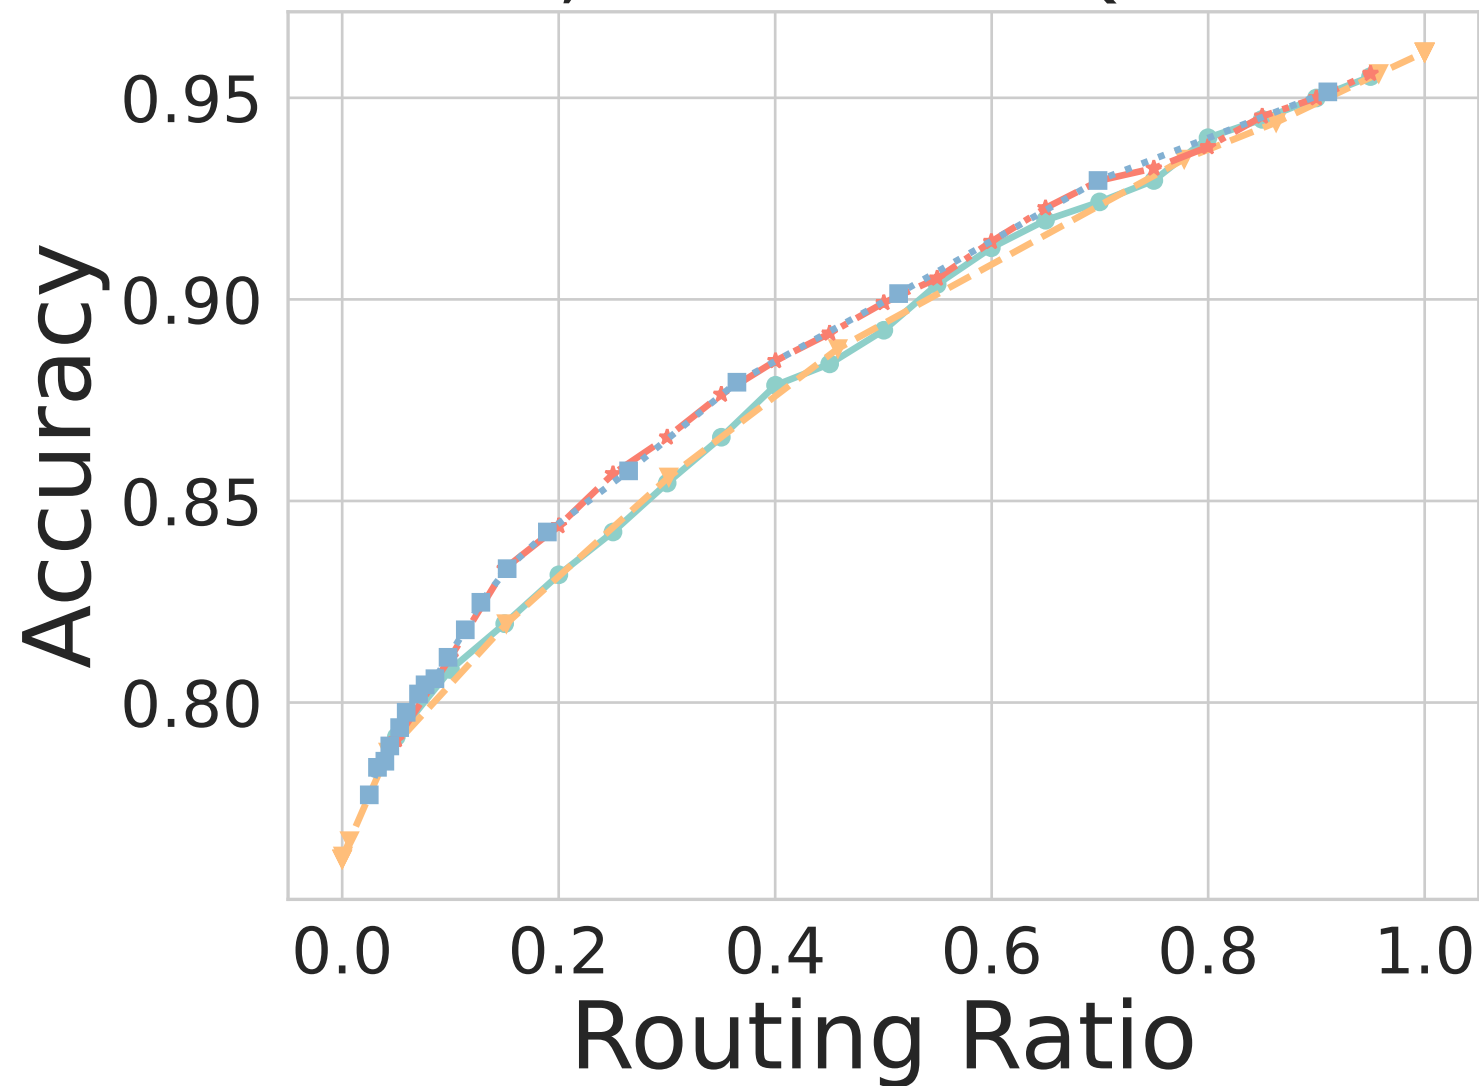

Supplement: supplementary_material [file cali_down_gsm8k_llama-3.2-3b_Qwen_Qwen3-32B.pdf › Routing_SLM_LLMs/Proxy_routing_prediction/to_Qwen_Qwen3-32B/gsm8k_as_downstream/cali_down_gsm8k_llama-3.2-3b_Qwen_Qwen3-32B.pdf]

**GSM8K, mistral-7b to Qwen3-32B**

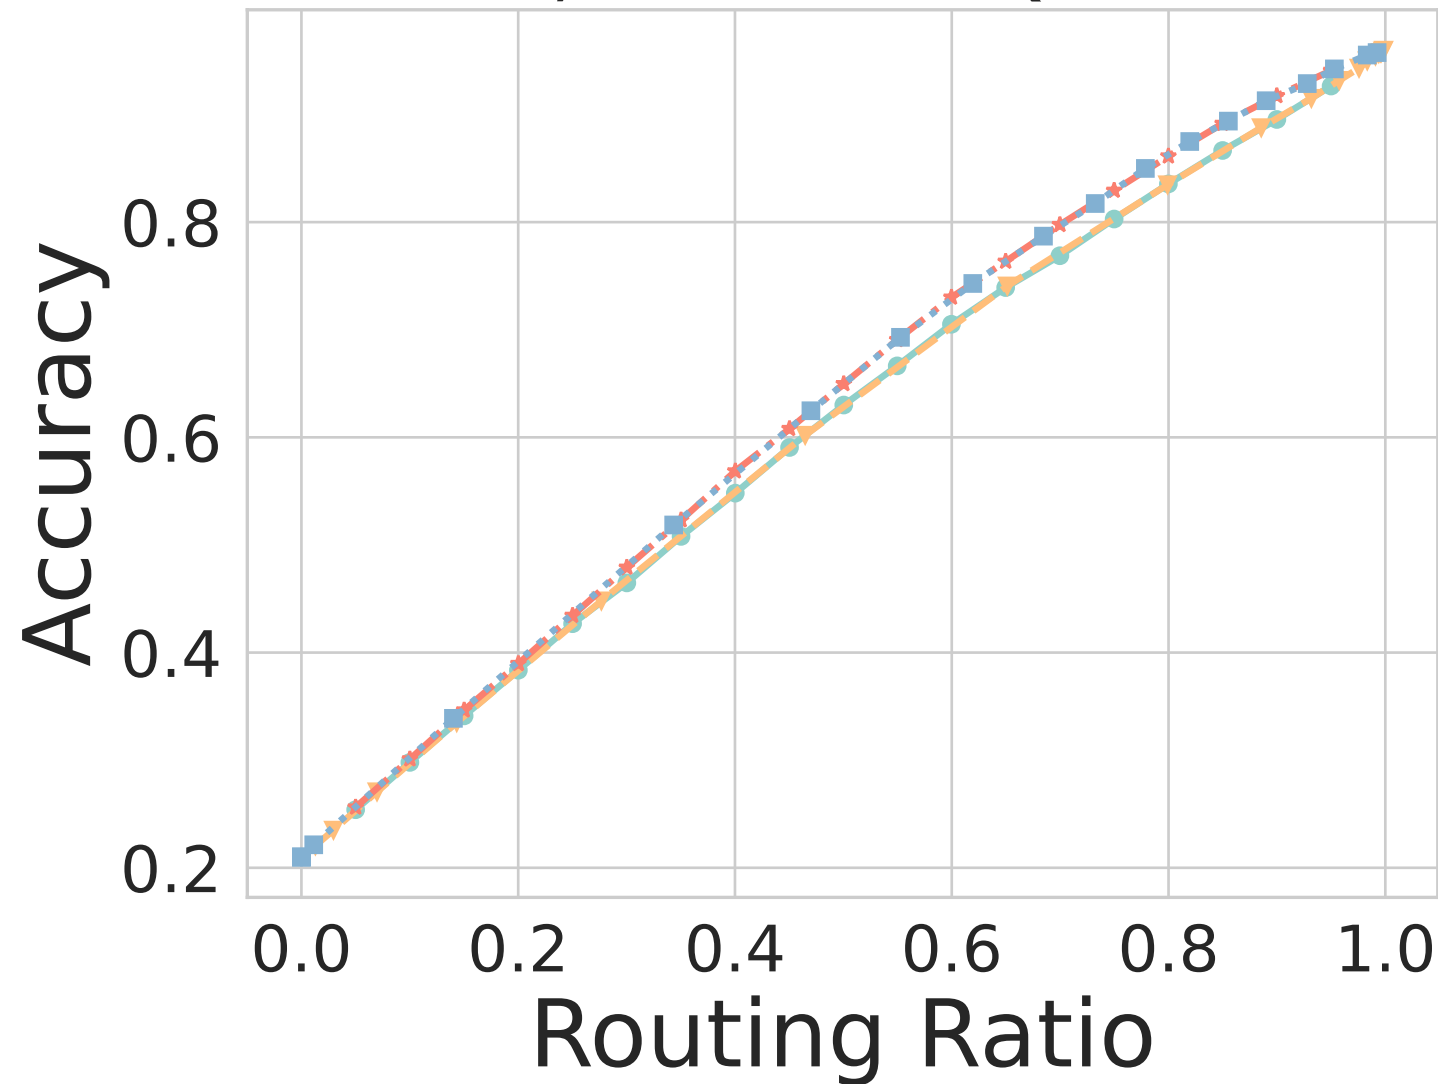

Supplement: supplementary_material [file cali_down_gsm8k_mistral-7b_Qwen_Qwen3-32B.pdf › Routing_SLM_LLMs/Proxy_routing_prediction/to_Qwen_Qwen3-32B/gsm8k_as_downstream/cali_down_gsm8k_mistral-7b_Qwen_Qwen3-32B.pdf]

**GSM8K, phi-3.5-mini to Qwen3-32B**

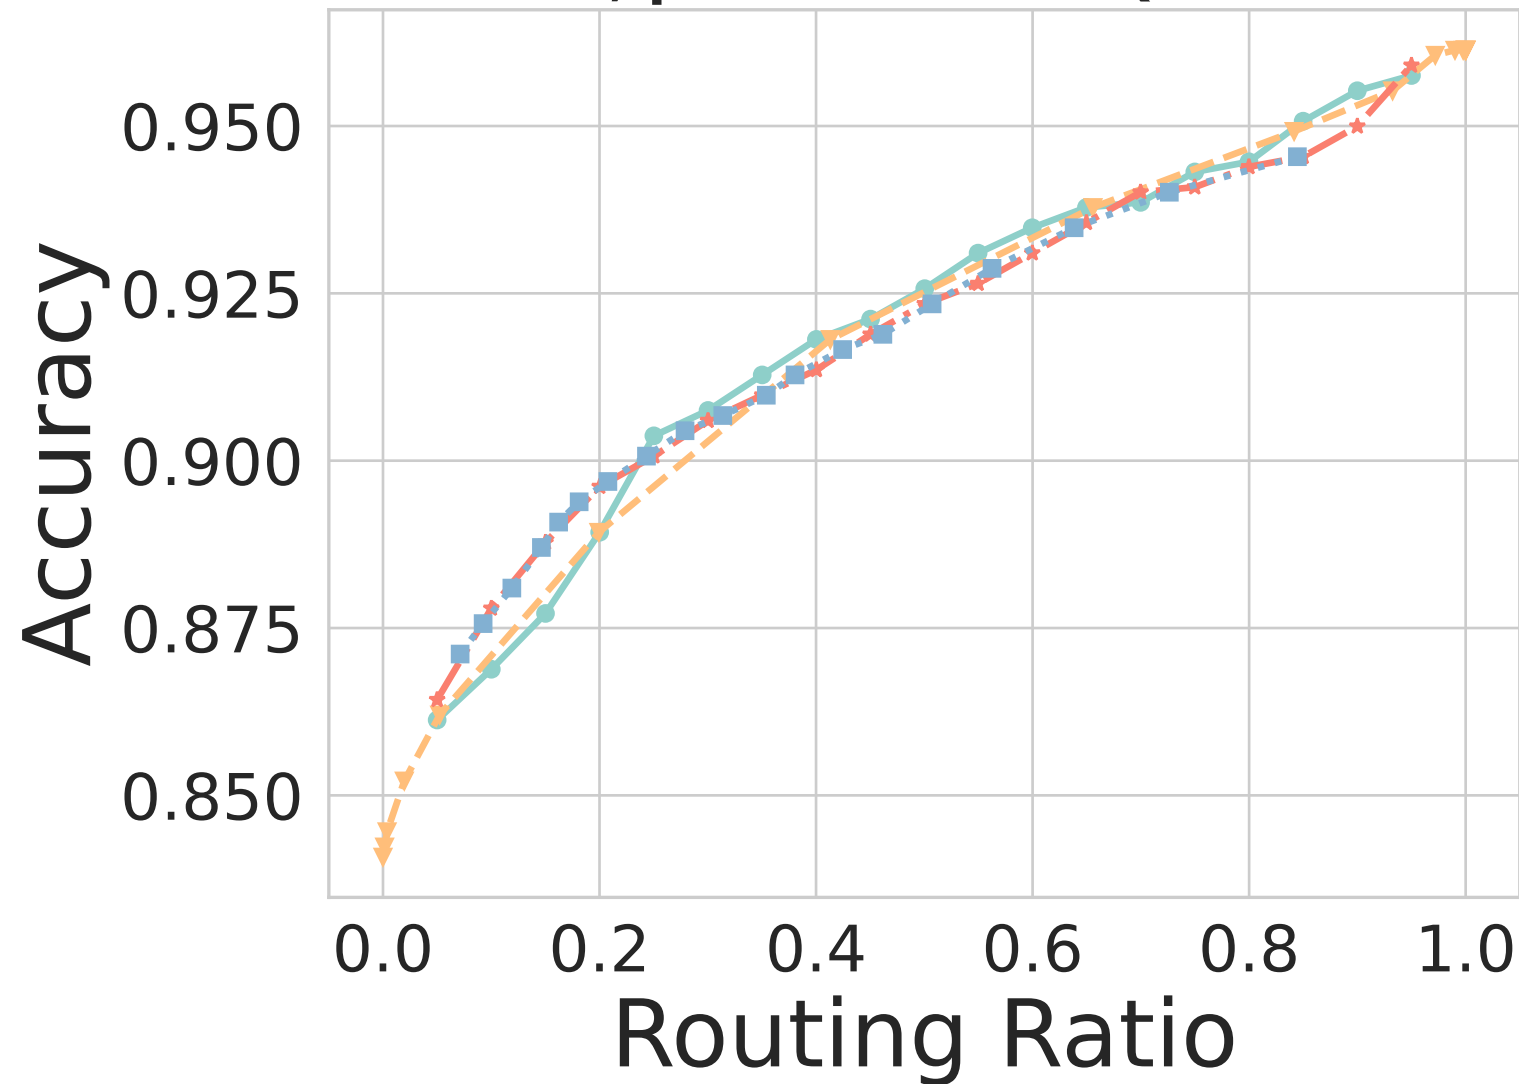

Supplement: supplementary_material [file cali_down_gsm8k_phi-3.5-mini_Qwen_Qwen3-32B.pdf › Routing_SLM_LLMs/Proxy_routing_prediction/to_Qwen_Qwen3-32B/gsm8k_as_downstream/cali_down_gsm8k_phi-3.5-mini_Qwen_Qwen3-32B.pdf]

**GSM8K, phi-4-mini-reasoning to Qwen3-32B**

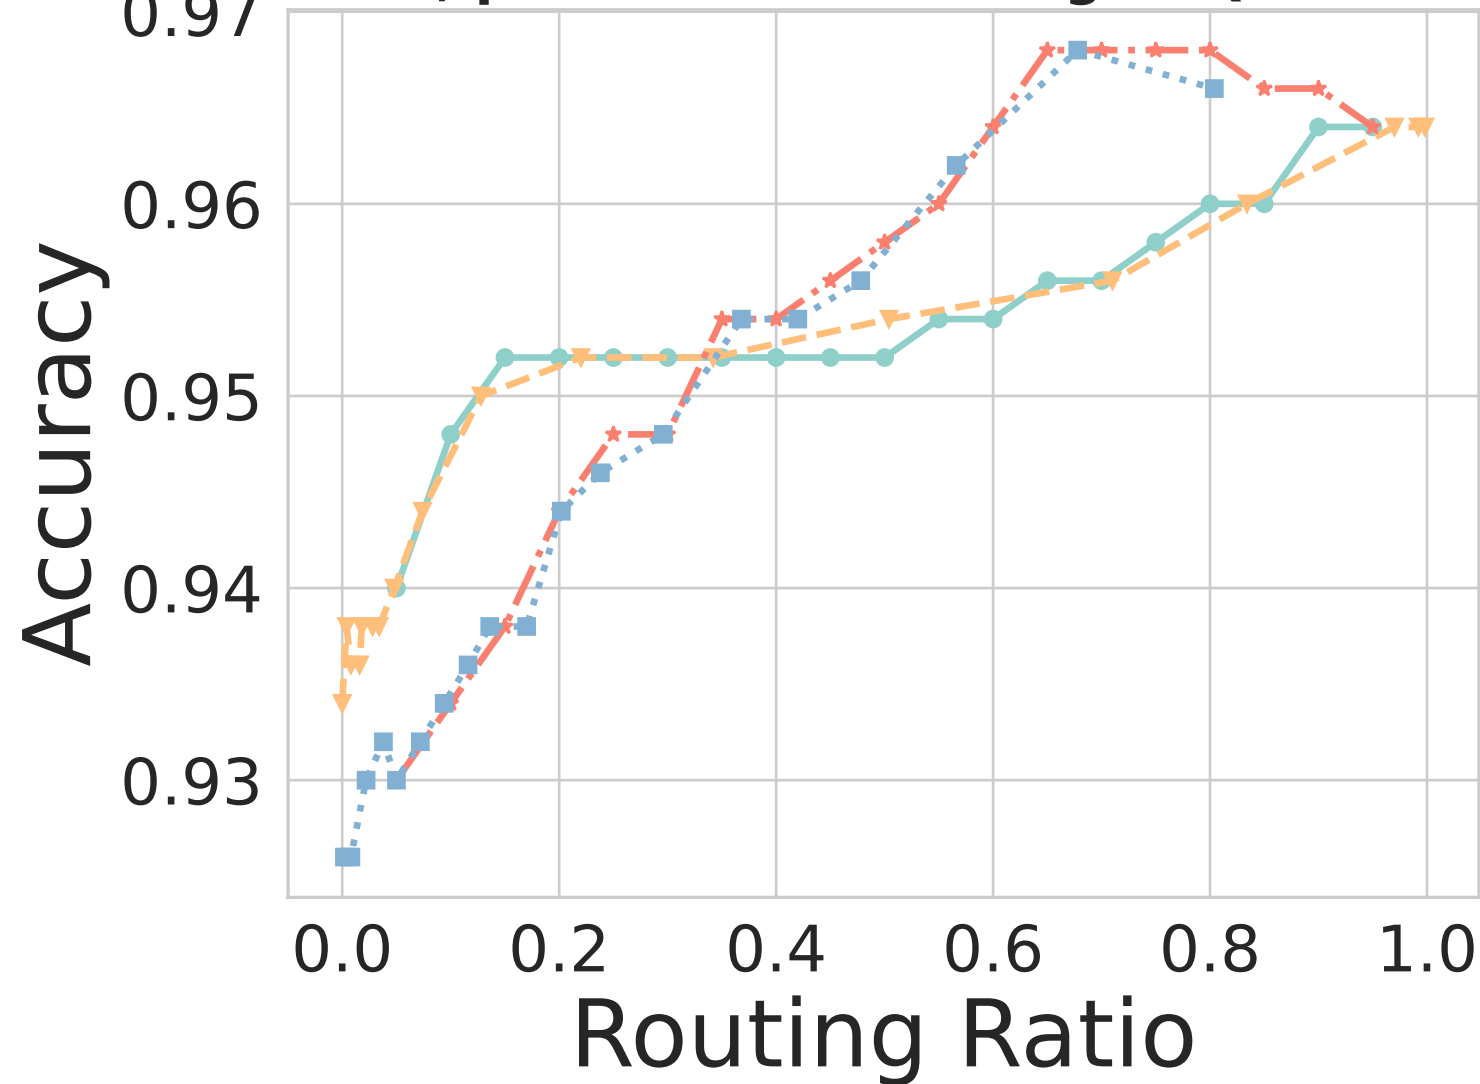

Supplement: supplementary_material [file cali_down_gsm8k_phi-4-mini-reasoning_Qwen_Qwen3-32B.pdf › Routing_SLM_LLMs/Proxy_routing_prediction/to_Qwen_Qwen3-32B/gsm8k_as_downstream/cali_down_gsm8k_phi-4-mini-reasoning_Qwen_Qwen3-32B.pdf]

**GSM8K, qwen-2.5-7b to Qwen3-32B**

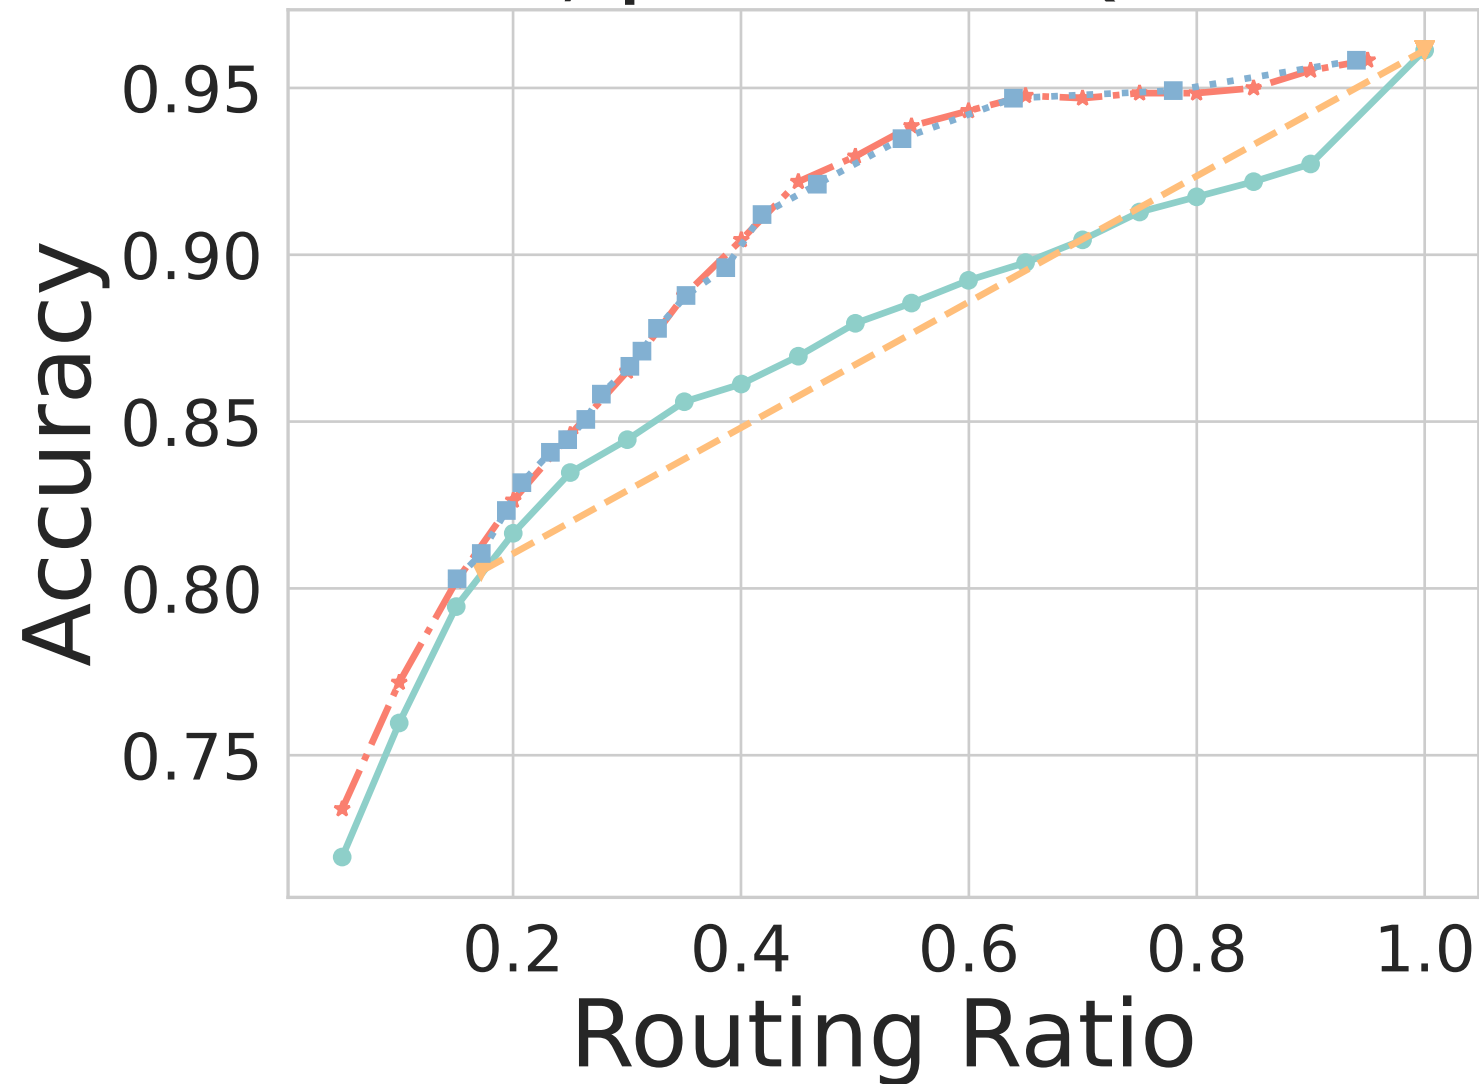

Supplement: supplementary_material [file cali_down_gsm8k_qwen-2.5-7b_Qwen_Qwen3-32B.pdf › Routing_SLM_LLMs/Proxy_routing_prediction/to_Qwen_Qwen3-32B/gsm8k_as_downstream/cali_down_gsm8k_qwen-2.5-7b_Qwen_Qwen3-32B.pdf]

**GSM8K, rwkv to Qwen3-32B**

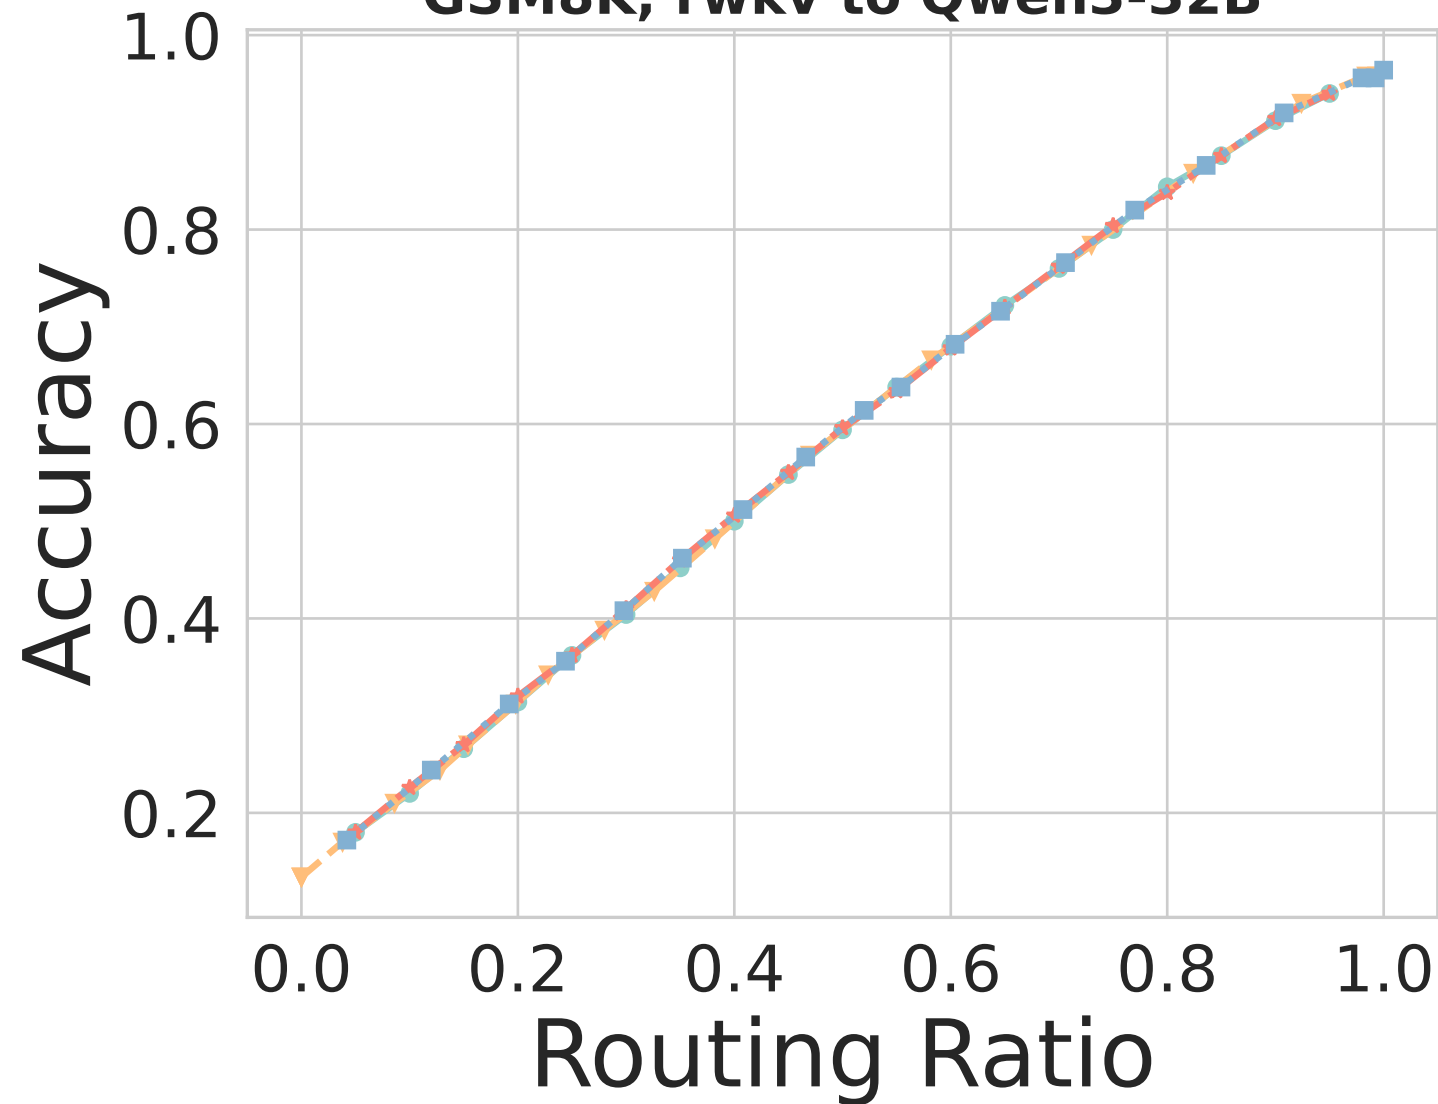

Supplement: supplementary_material [file cali_down_gsm8k_rwkv_Qwen_Qwen3-32B.pdf › Routing_SLM_LLMs/Proxy_routing_prediction/to_Qwen_Qwen3-32B/gsm8k_as_downstream/cali_down_gsm8k_rwkv_Qwen_Qwen3-32B.pdf]

**HellaSwag, Qwen3-0.6B to Qwen3-32B**

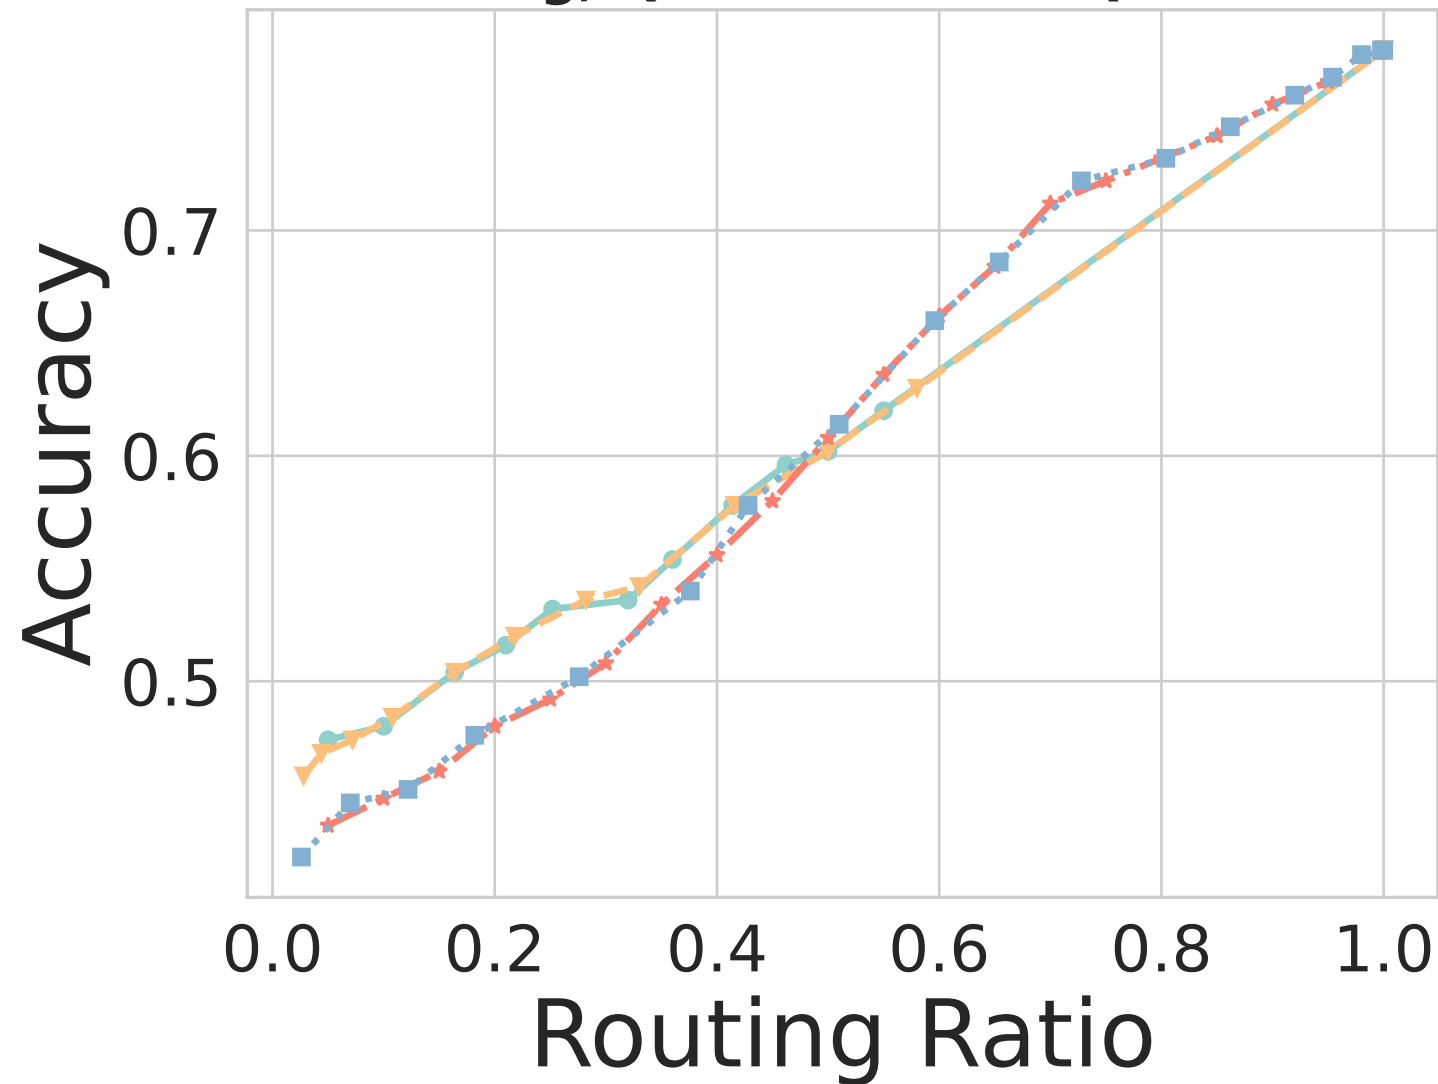

Supplement: supplementary_material [file cali_down_hellaswag_Qwen3-0.6B_Qwen_Qwen3-32B.pdf › Routing_SLM_LLMs/Proxy_routing_prediction/to_Qwen_Qwen3-32B/hellaswag_as_downstream/cali_down_hellaswag_Qwen3-0.6B_Qwen_Qwen3-32B.pdf]

**HellaSwag, Qwen3-1.7B to Qwen3-32B**

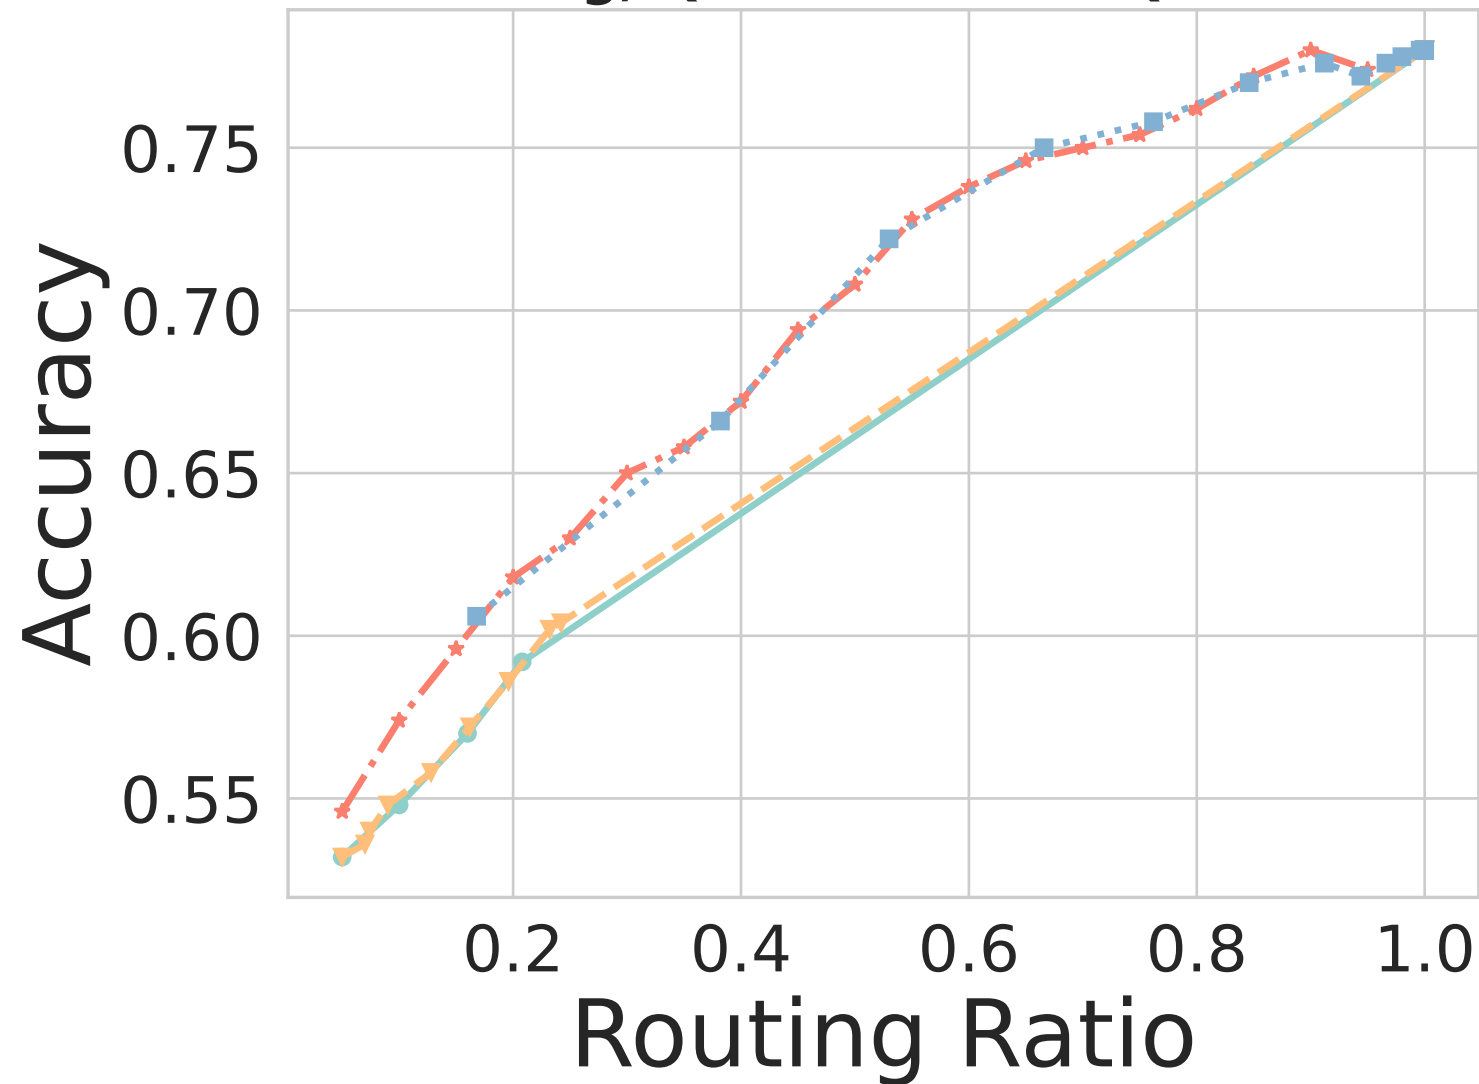

Supplement: supplementary_material [file cali_down_hellaswag_Qwen3-1.7B_Qwen_Qwen3-32B.pdf › Routing_SLM_LLMs/Proxy_routing_prediction/to_Qwen_Qwen3-32B/hellaswag_as_downstream/cali_down_hellaswag_Qwen3-1.7B_Qwen_Qwen3-32B.pdf]

**HellaSwag, Qwen3-4B to Qwen3-32B**

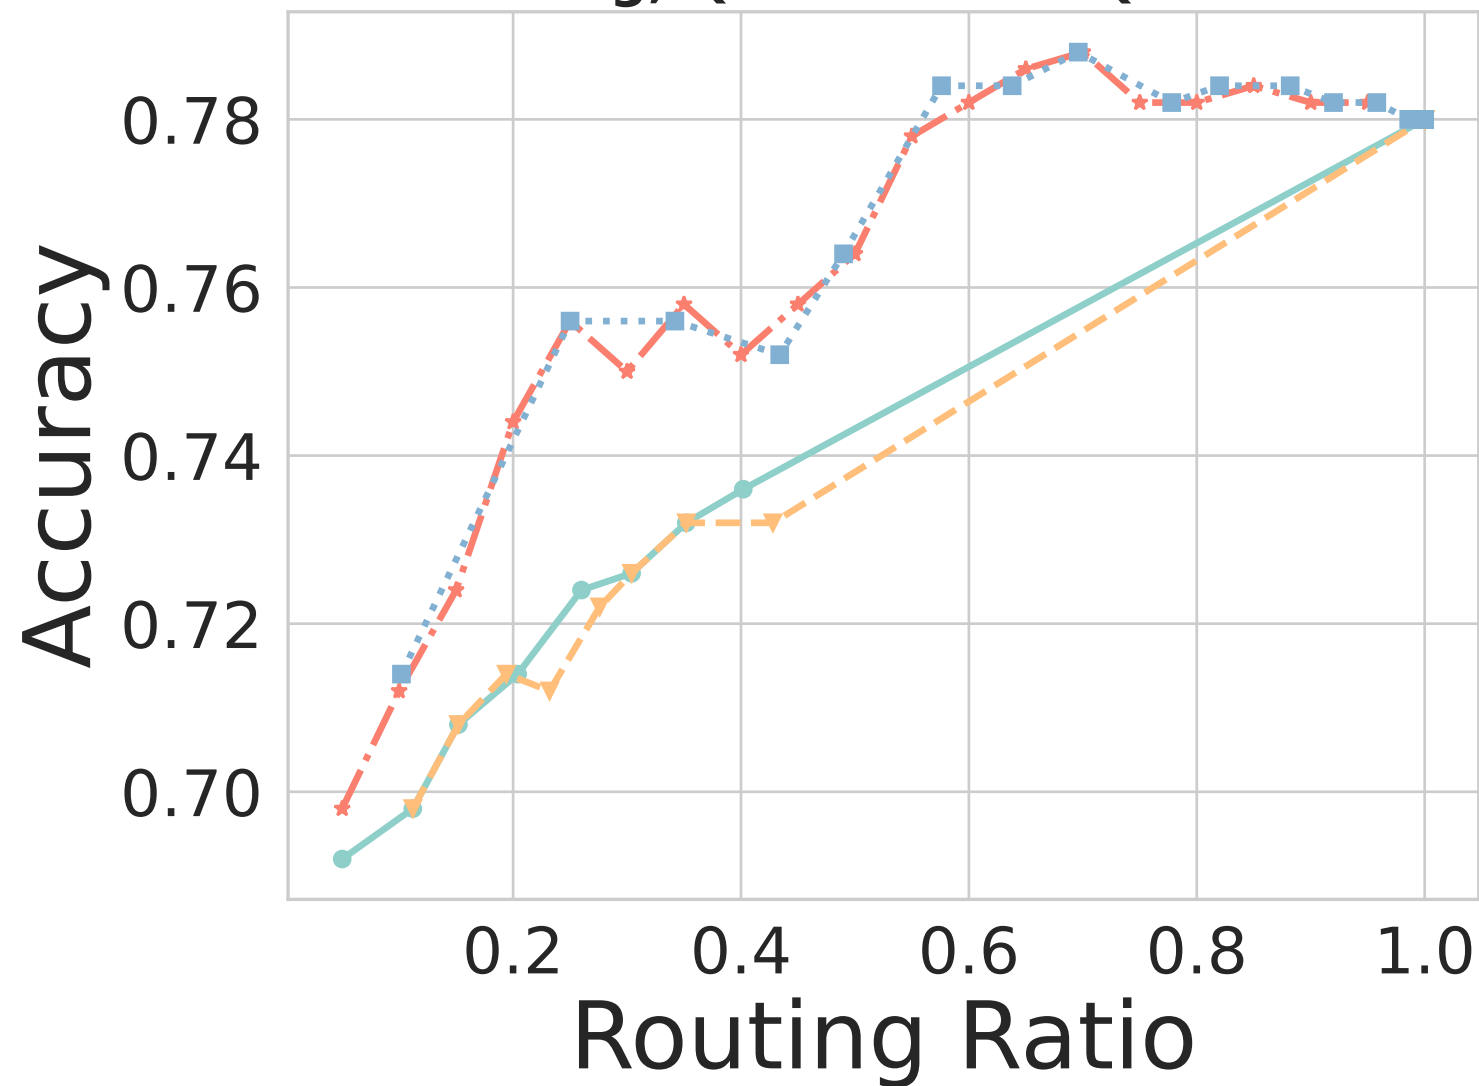

Supplement: supplementary_material [file cali_down_hellaswag_Qwen3-4B_Qwen_Qwen3-32B.pdf › Routing_SLM_LLMs/Proxy_routing_prediction/to_Qwen_Qwen3-32B/hellaswag_as_downstream/cali_down_hellaswag_Qwen3-4B_Qwen_Qwen3-32B.pdf]

**HellaSwag, granite-3.1-8b to Qwen3-32B**

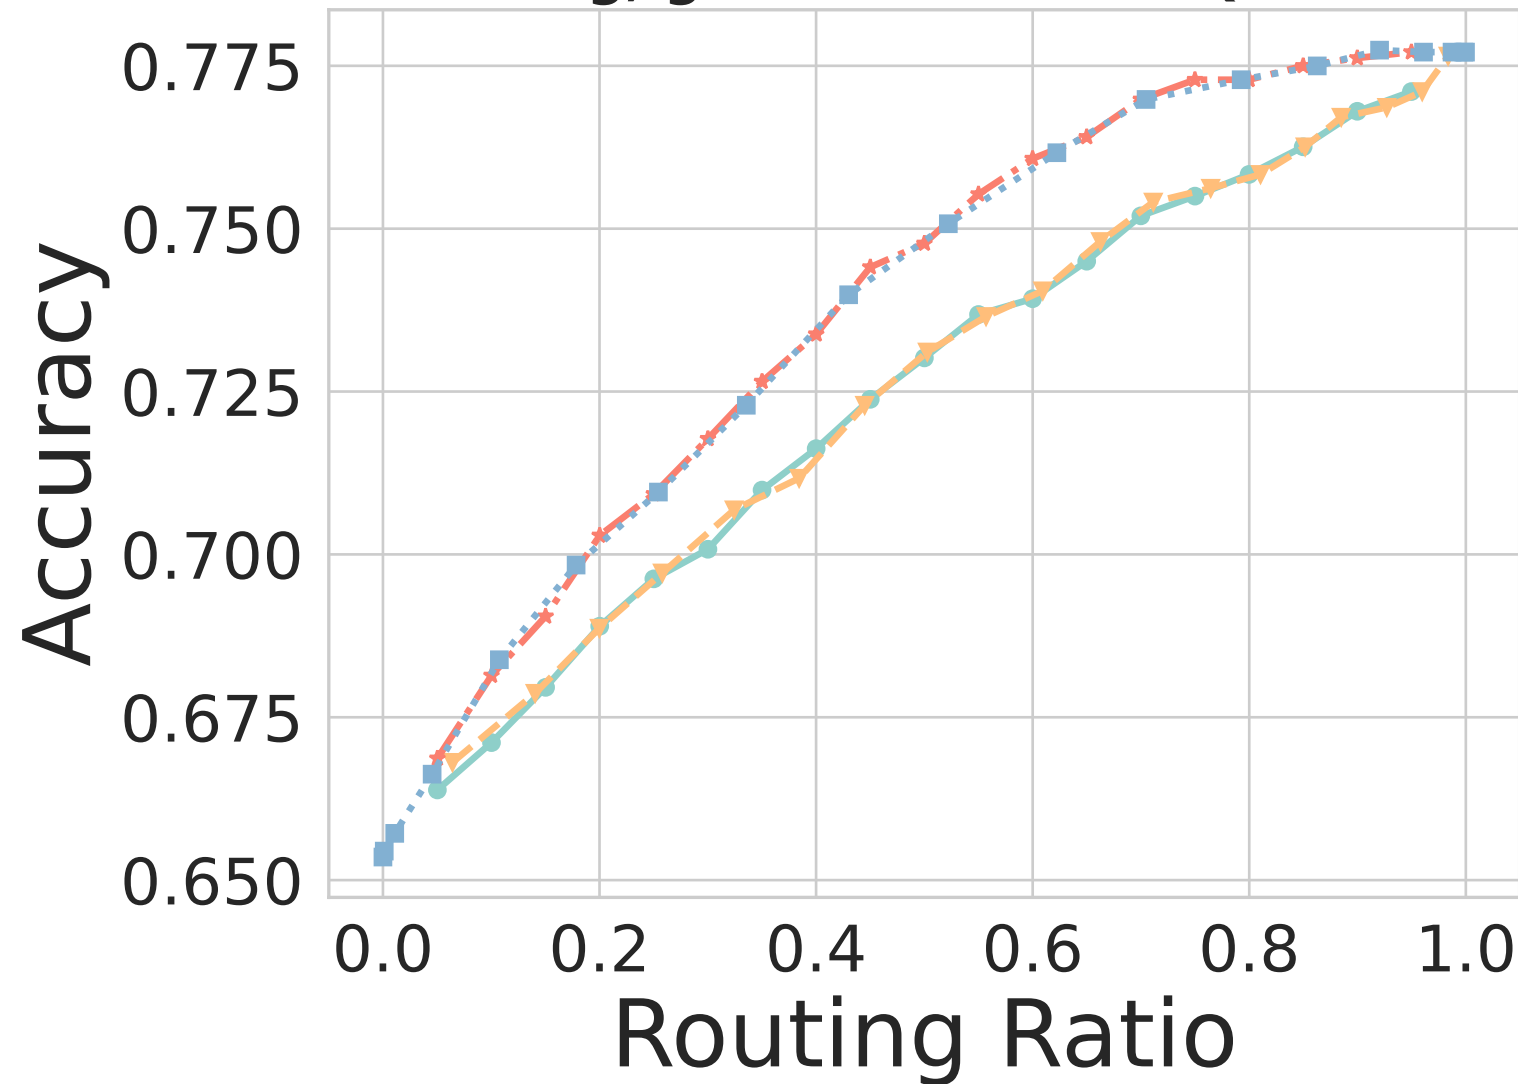

Supplement: supplementary_material [file cali_down_hellaswag_granite-3.1-8b_Qwen_Qwen3-32B.pdf › Routing_SLM_LLMs/Proxy_routing_prediction/to_Qwen_Qwen3-32B/hellaswag_as_downstream/cali_down_hellaswag_granite-3.1-8b_Qwen_Qwen3-32B.pdf]

**HellaSwag, llama-3.1-8b to Qwen3-32B**

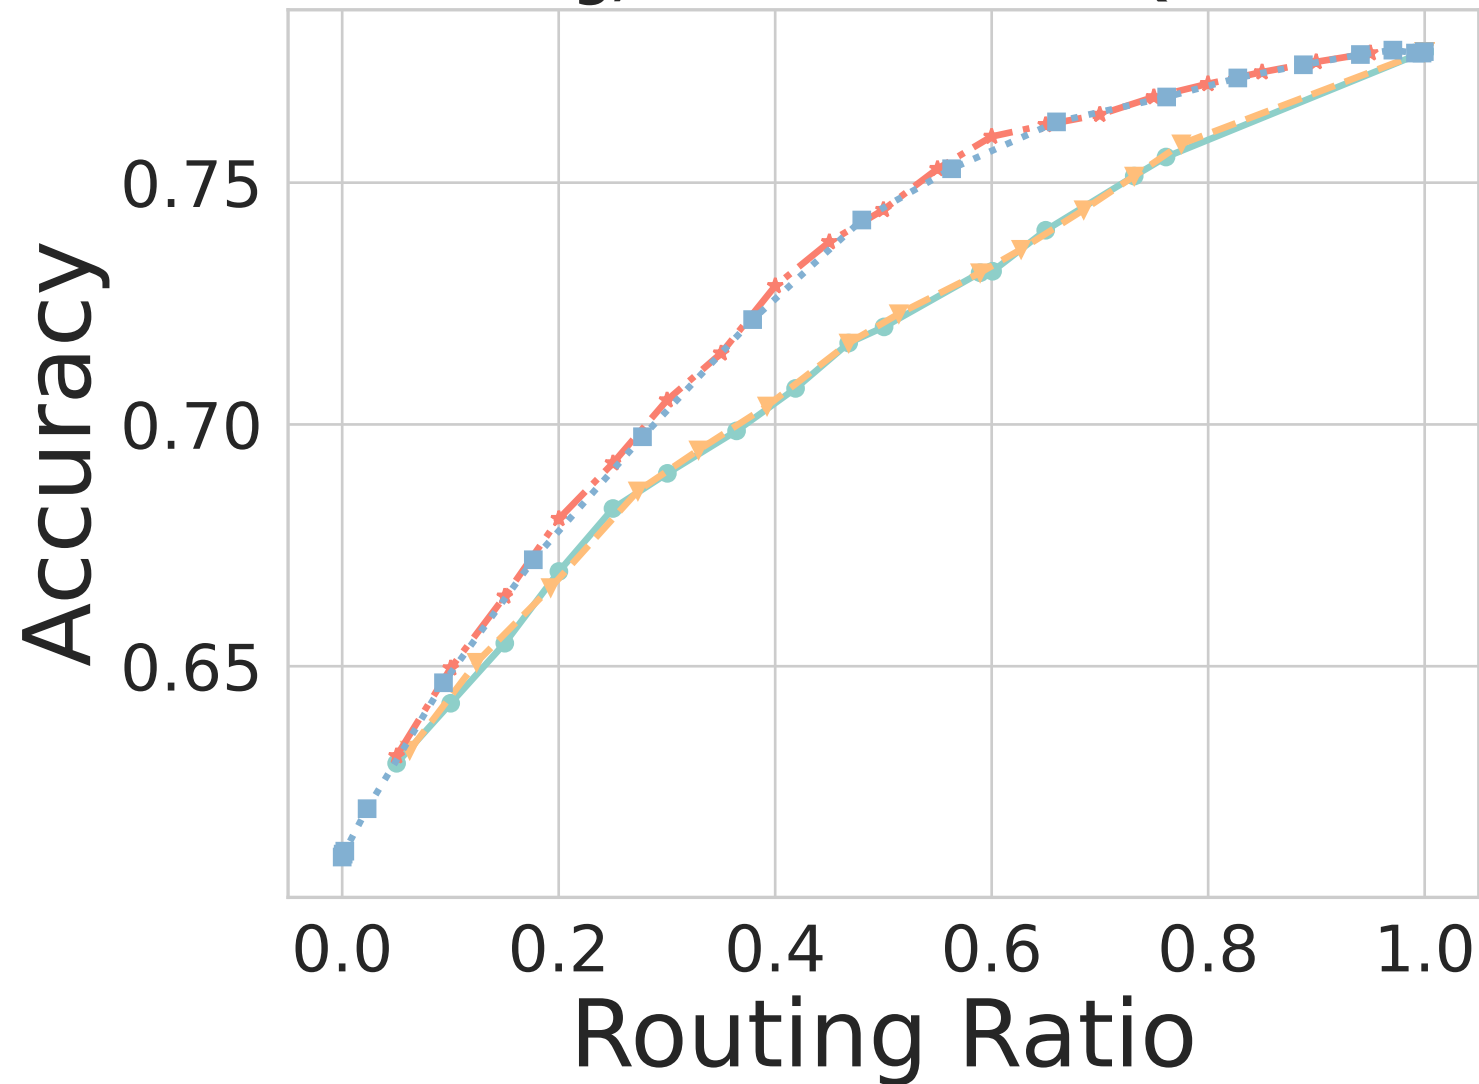

Supplement: supplementary_material [file cali_down_hellaswag_llama-3.1-8b_Qwen_Qwen3-32B.pdf › Routing_SLM_LLMs/Proxy_routing_prediction/to_Qwen_Qwen3-32B/hellaswag_as_downstream/cali_down_hellaswag_llama-3.1-8b_Qwen_Qwen3-32B.pdf]

**HellaSwag, llama-3.2-1b to Qwen3-32B**

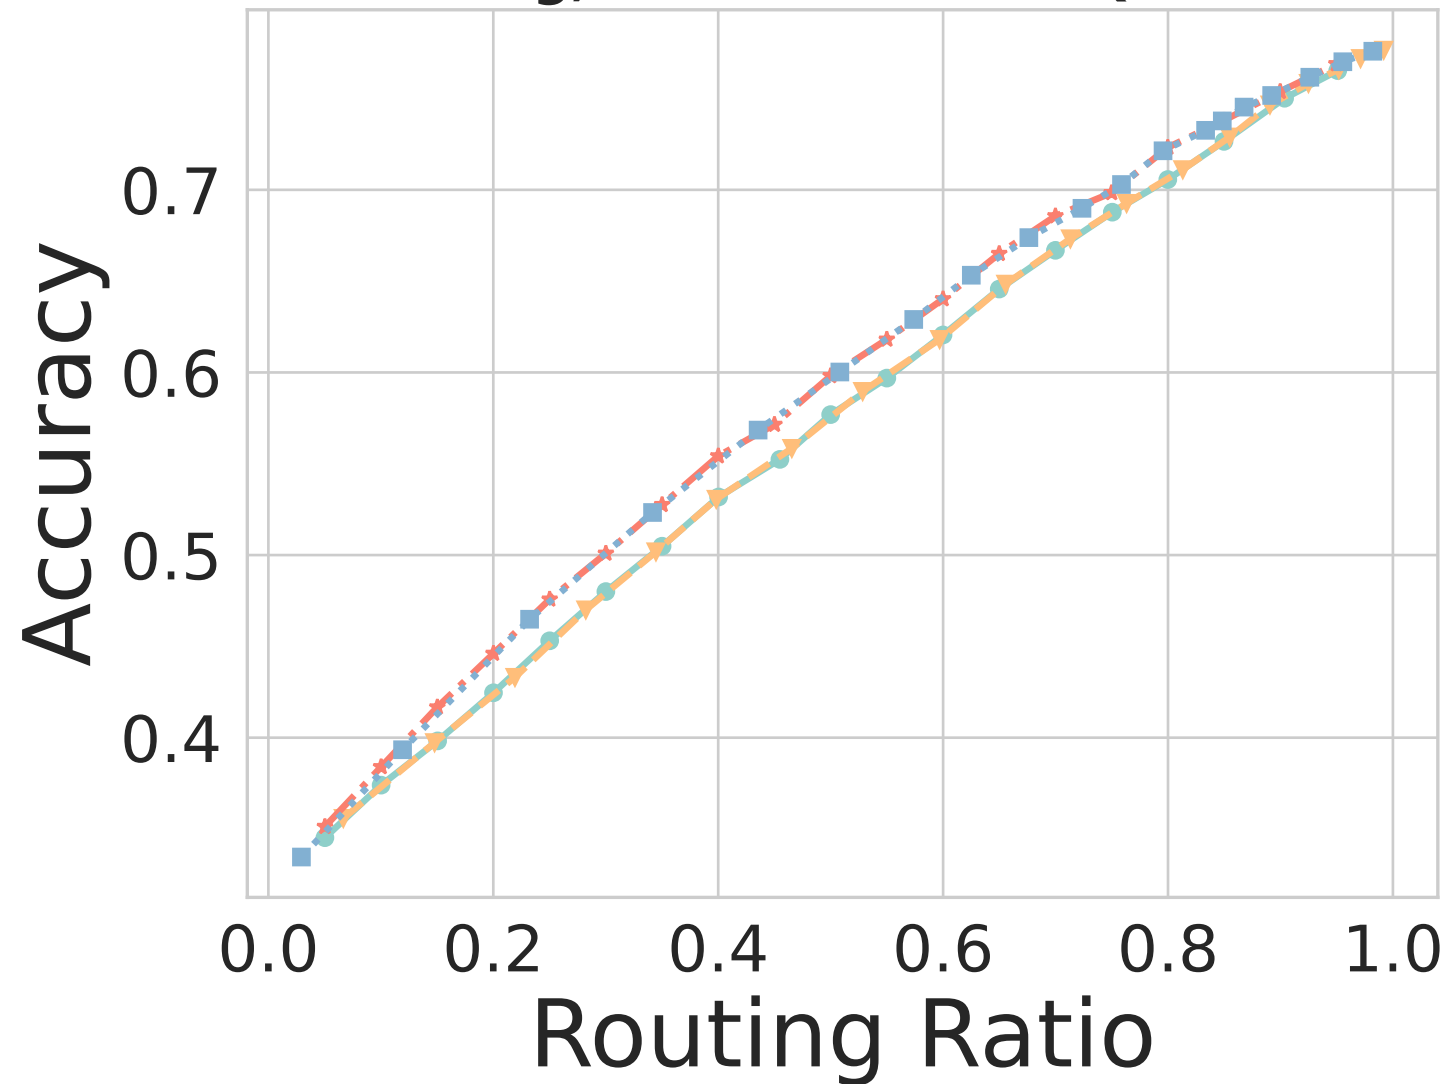

Supplement: supplementary_material [file cali_down_hellaswag_llama-3.2-1b_Qwen_Qwen3-32B.pdf › Routing_SLM_LLMs/Proxy_routing_prediction/to_Qwen_Qwen3-32B/hellaswag_as_downstream/cali_down_hellaswag_llama-3.2-1b_Qwen_Qwen3-32B.pdf]

**HellaSwag, llama-3.2-3b to Qwen3-32B**

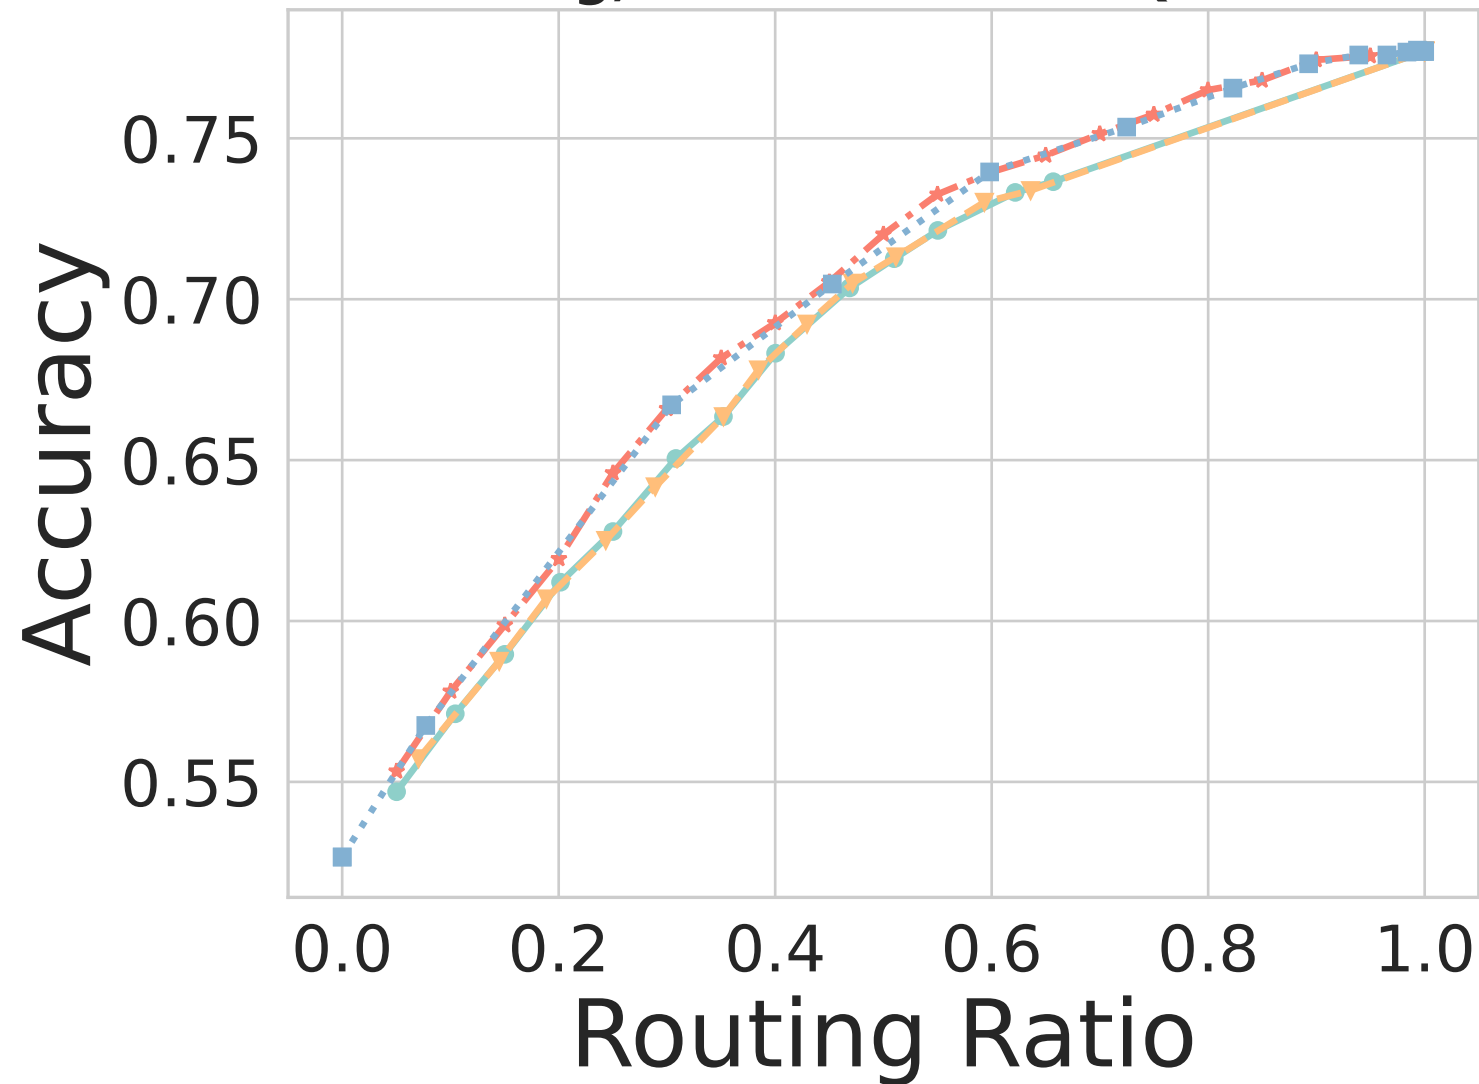

Supplement: supplementary_material [file cali_down_hellaswag_llama-3.2-3b_Qwen_Qwen3-32B.pdf › Routing_SLM_LLMs/Proxy_routing_prediction/to_Qwen_Qwen3-32B/hellaswag_as_downstream/cali_down_hellaswag_llama-3.2-3b_Qwen_Qwen3-32B.pdf]

**HellaSwag, mistral-7b to Qwen3-32B**

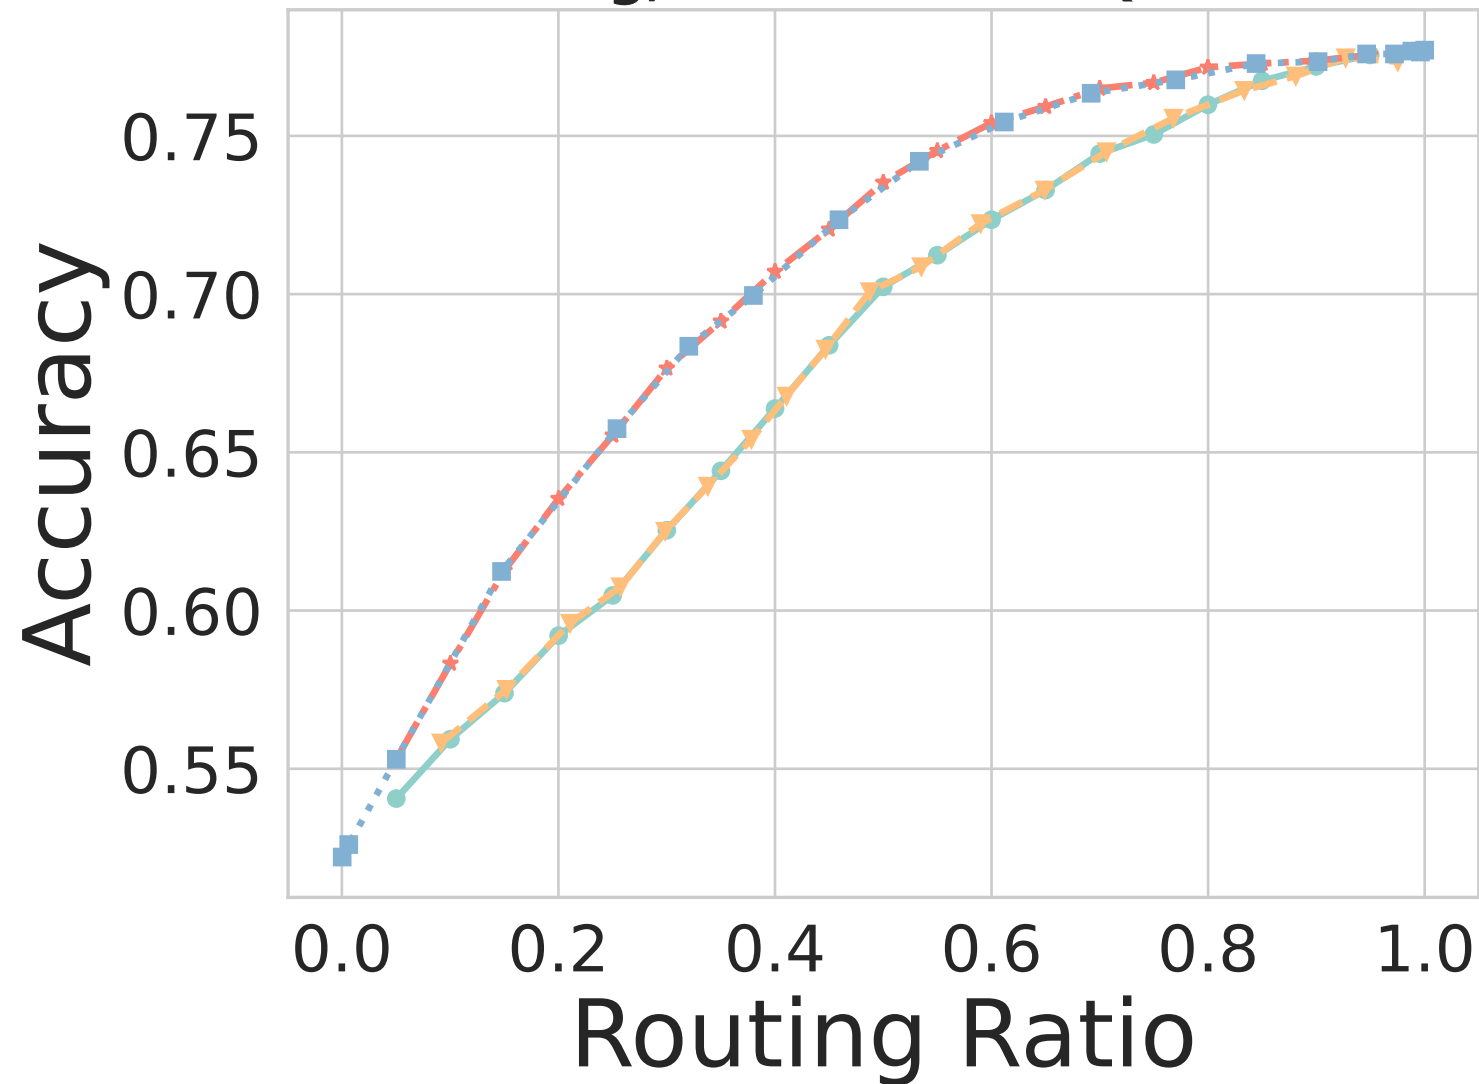

Supplement: supplementary_material [file cali_down_hellaswag_mistral-7b_Qwen_Qwen3-32B.pdf › Routing_SLM_LLMs/Proxy_routing_prediction/to_Qwen_Qwen3-32B/hellaswag_as_downstream/cali_down_hellaswag_mistral-7b_Qwen_Qwen3-32B.pdf]

**HellaSwag, phi-3.5-mini to Qwen3-32B**

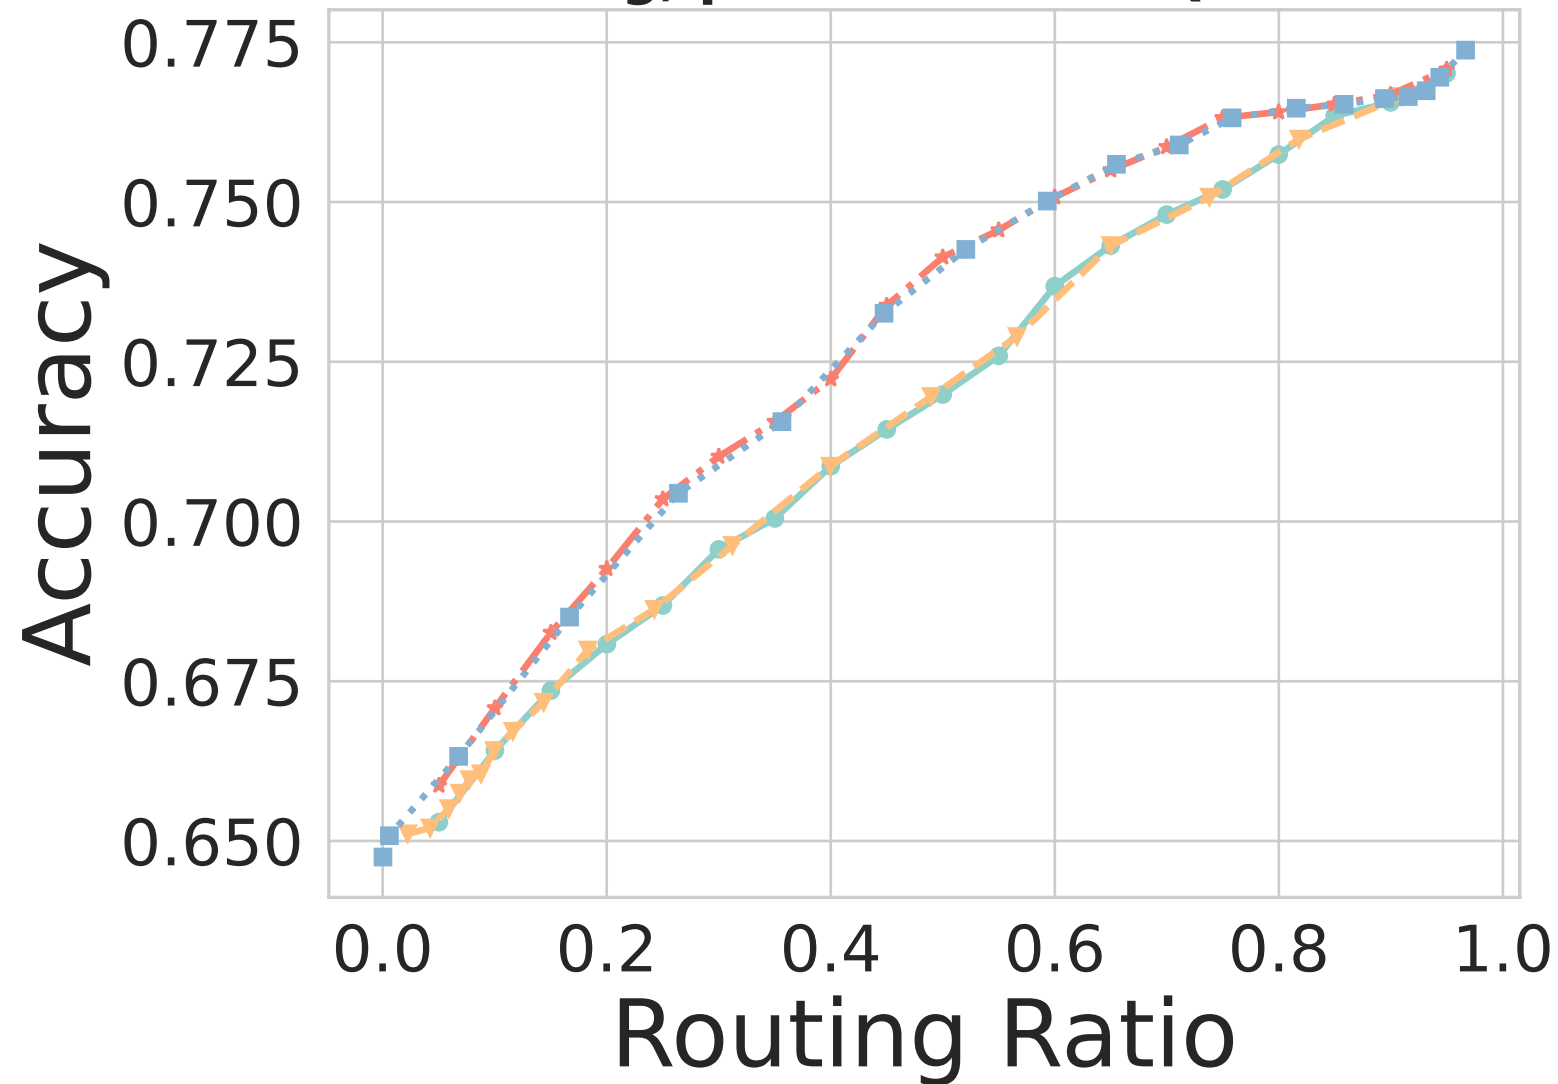

Supplement: supplementary_material [file cali_down_hellaswag_phi-3.5-mini_Qwen_Qwen3-32B.pdf › Routing_SLM_LLMs/Proxy_routing_prediction/to_Qwen_Qwen3-32B/hellaswag_as_downstream/cali_down_hellaswag_phi-3.5-mini_Qwen_Qwen3-32B.pdf]

**HellaSwag, phi-4-mini-reasoning to Qwen3-32B**

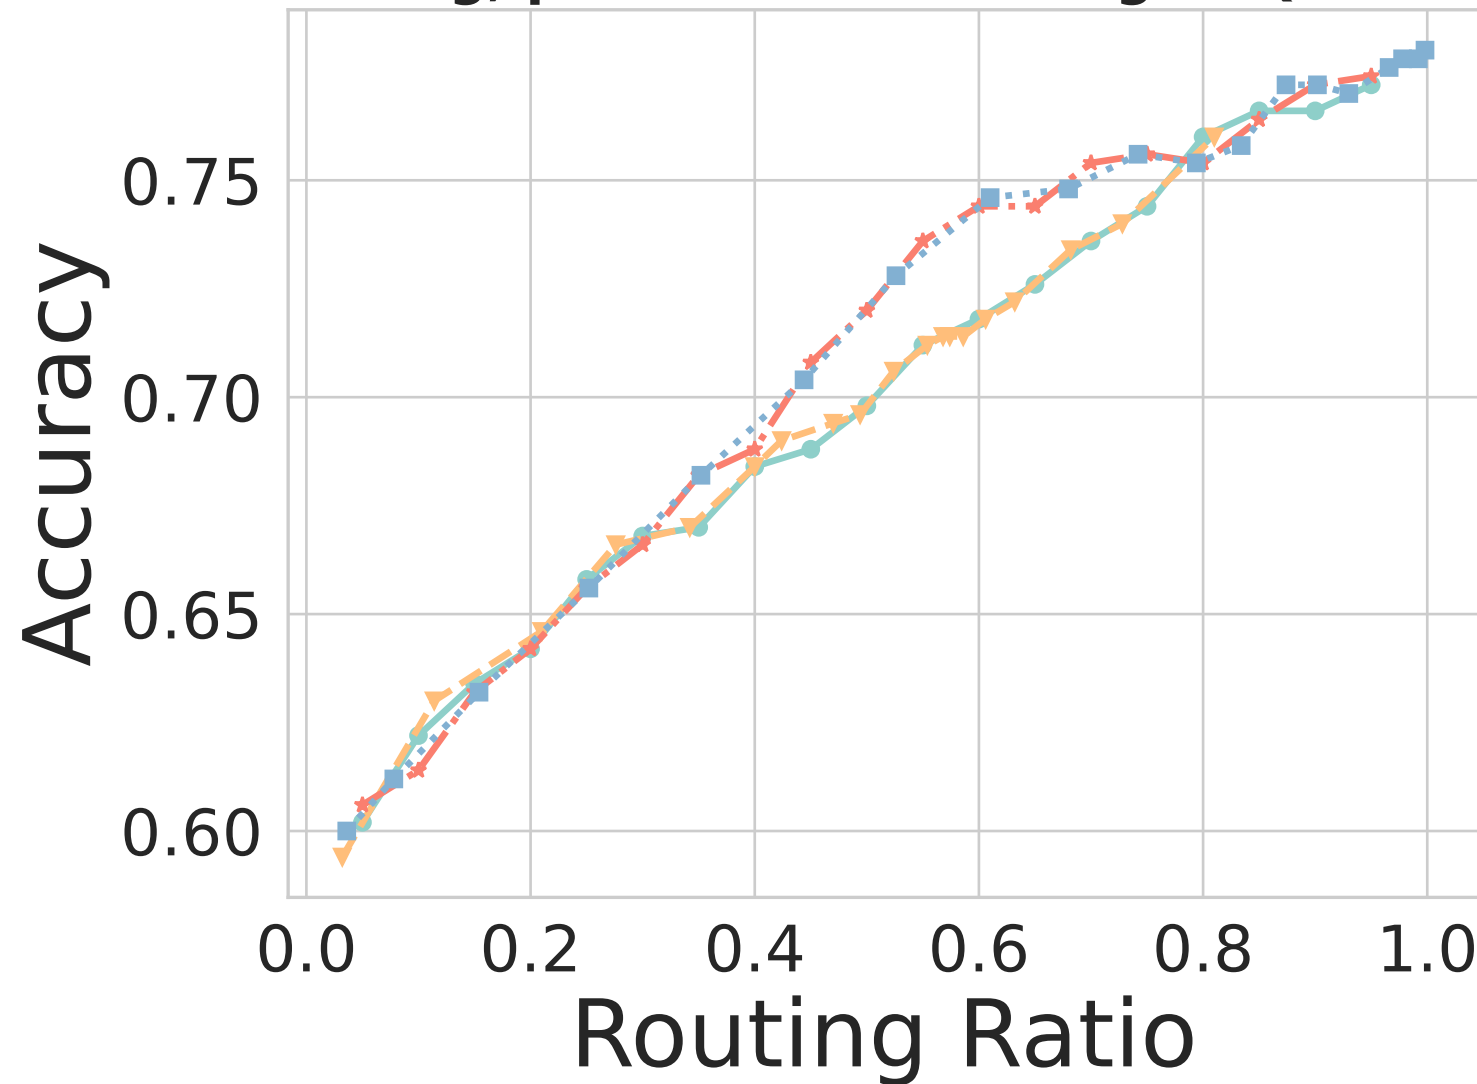

Supplement: supplementary_material [file cali_down_hellaswag_phi-4-mini-reasoning_Qwen_Qwen3-32B.pdf › Routing_SLM_LLMs/Proxy_routing_prediction/to_Qwen_Qwen3-32B/hellaswag_as_downstream/cali_down_hellaswag_phi-4-mini-reasoning_Qwen_Qwen3-32B.pdf]

**HellaSwag, qwen-2.5-7b to Qwen3-32B**

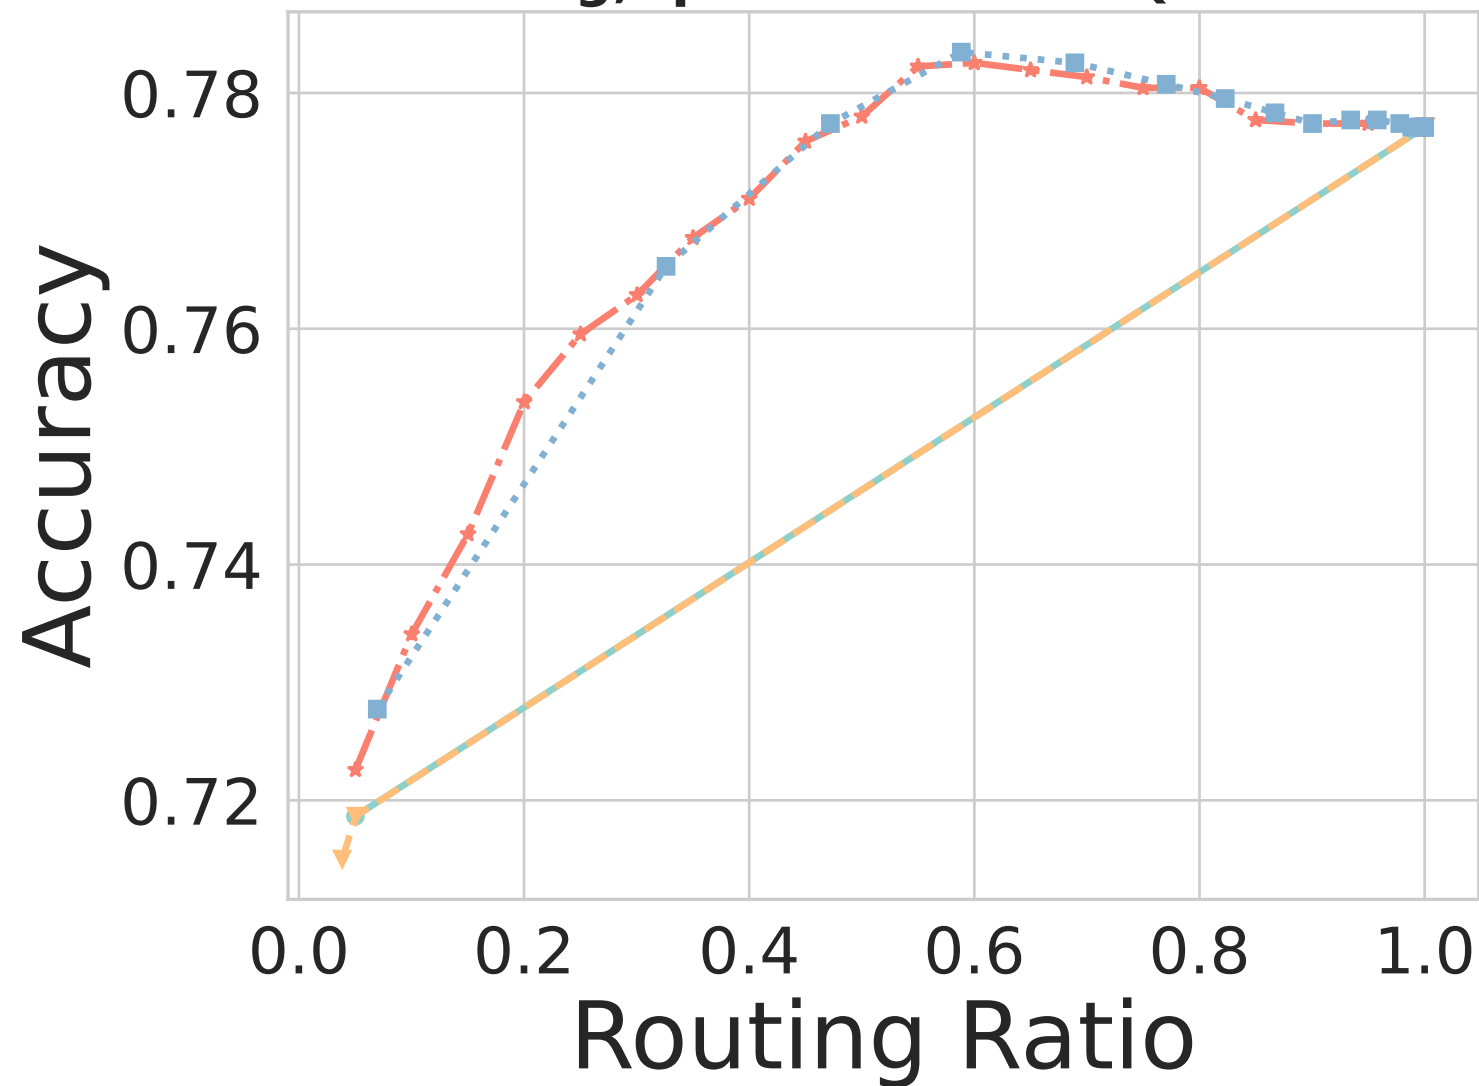

Supplement: supplementary_material [file cali_down_hellaswag_qwen-2.5-7b_Qwen_Qwen3-32B.pdf › Routing_SLM_LLMs/Proxy_routing_prediction/to_Qwen_Qwen3-32B/hellaswag_as_downstream/cali_down_hellaswag_qwen-2.5-7b_Qwen_Qwen3-32B.pdf]

**HellaSwag, rwkv to Qwen3-32B**

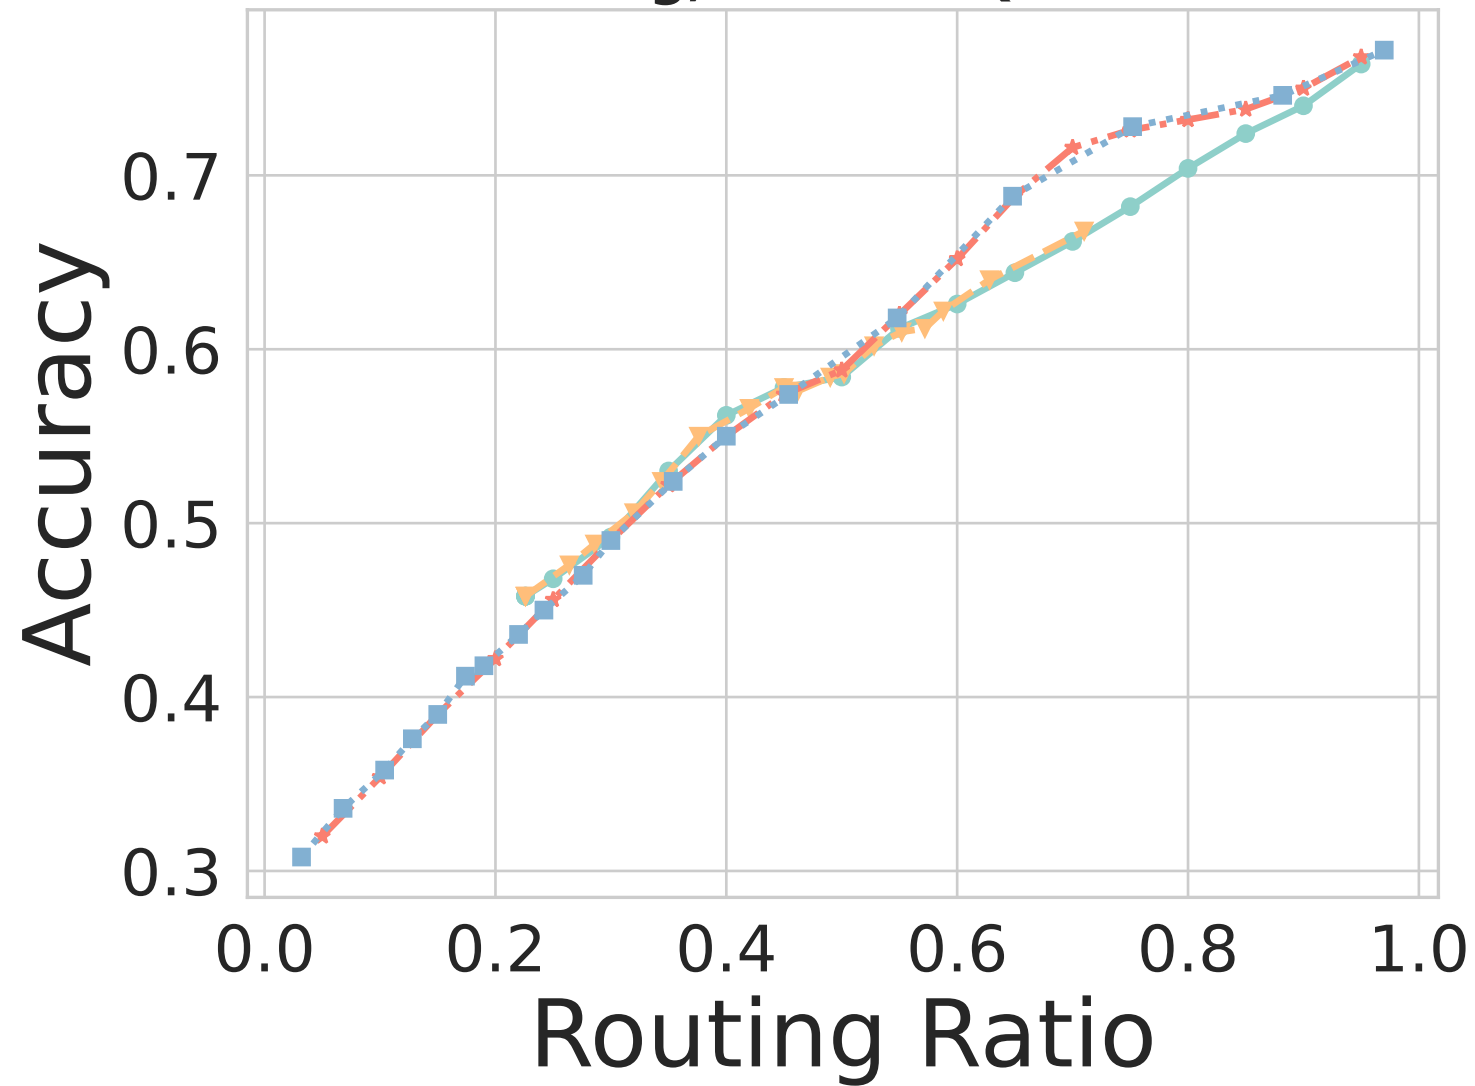

Supplement: supplementary_material [file cali_down_hellaswag_rwkv_Qwen_Qwen3-32B.pdf › Routing_SLM_LLMs/Proxy_routing_prediction/to_Qwen_Qwen3-32B/hellaswag_as_downstream/cali_down_hellaswag_rwkv_Qwen_Qwen3-32B.pdf]

**MATH-500, Qwen3-0.6B to Qwen3-32B**

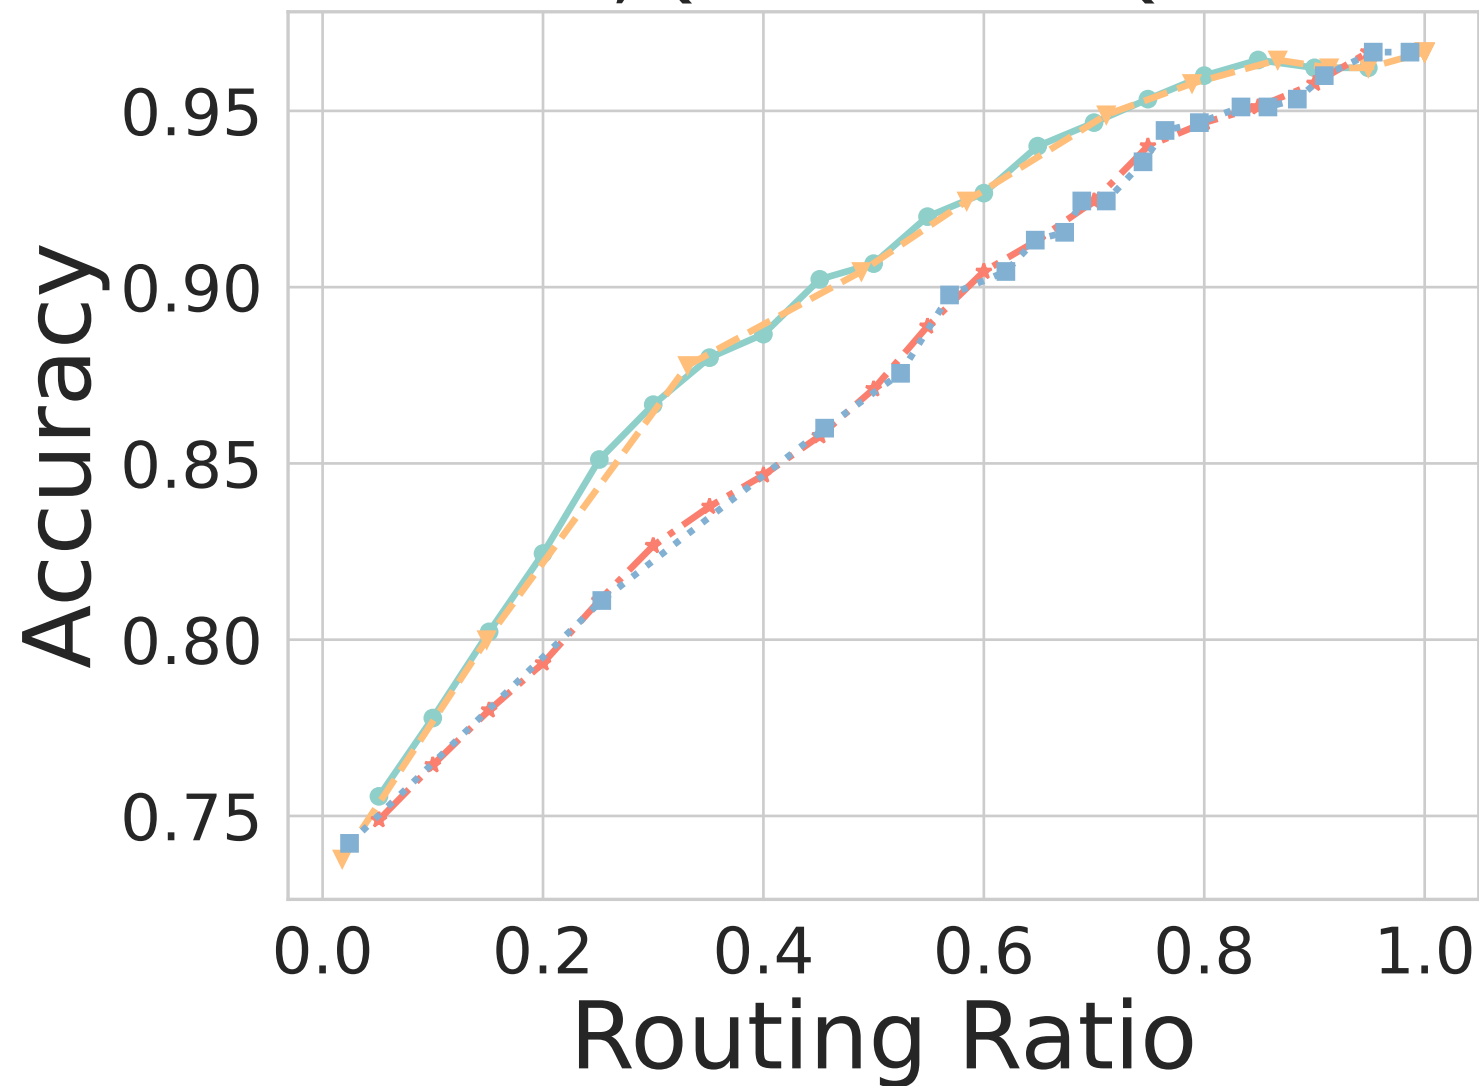

Supplement: supplementary_material [file cali_down_math_500_Qwen3-0.6B_Qwen_Qwen3-32B.pdf › Routing_SLM_LLMs/Proxy_routing_prediction/to_Qwen_Qwen3-32B/math_500_as_downstream/cali_down_math_500_Qwen3-0.6B_Qwen_Qwen3-32B.pdf]

**MATH-500, Qwen3-1.7B to Qwen3-32B**

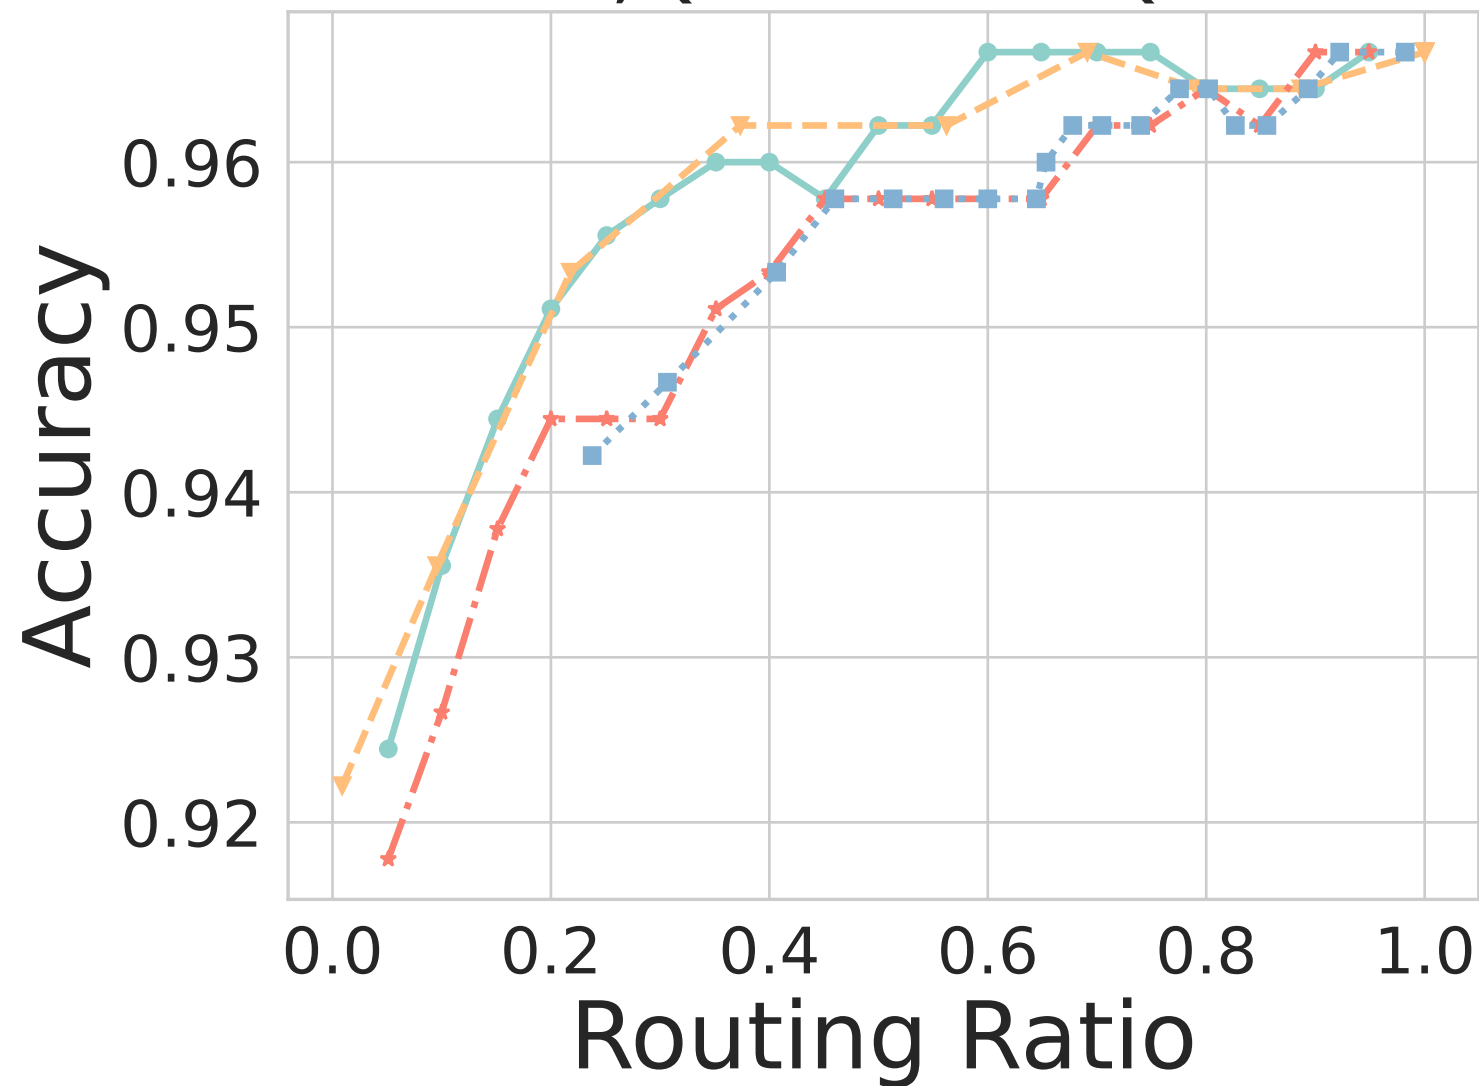

Supplement: supplementary_material [file cali_down_math_500_Qwen3-1.7B_Qwen_Qwen3-32B.pdf › Routing_SLM_LLMs/Proxy_routing_prediction/to_Qwen_Qwen3-32B/math_500_as_downstream/cali_down_math_500_Qwen3-1.7B_Qwen_Qwen3-32B.pdf]

**MATH-500, Qwen3-4B to Qwen3-32B**

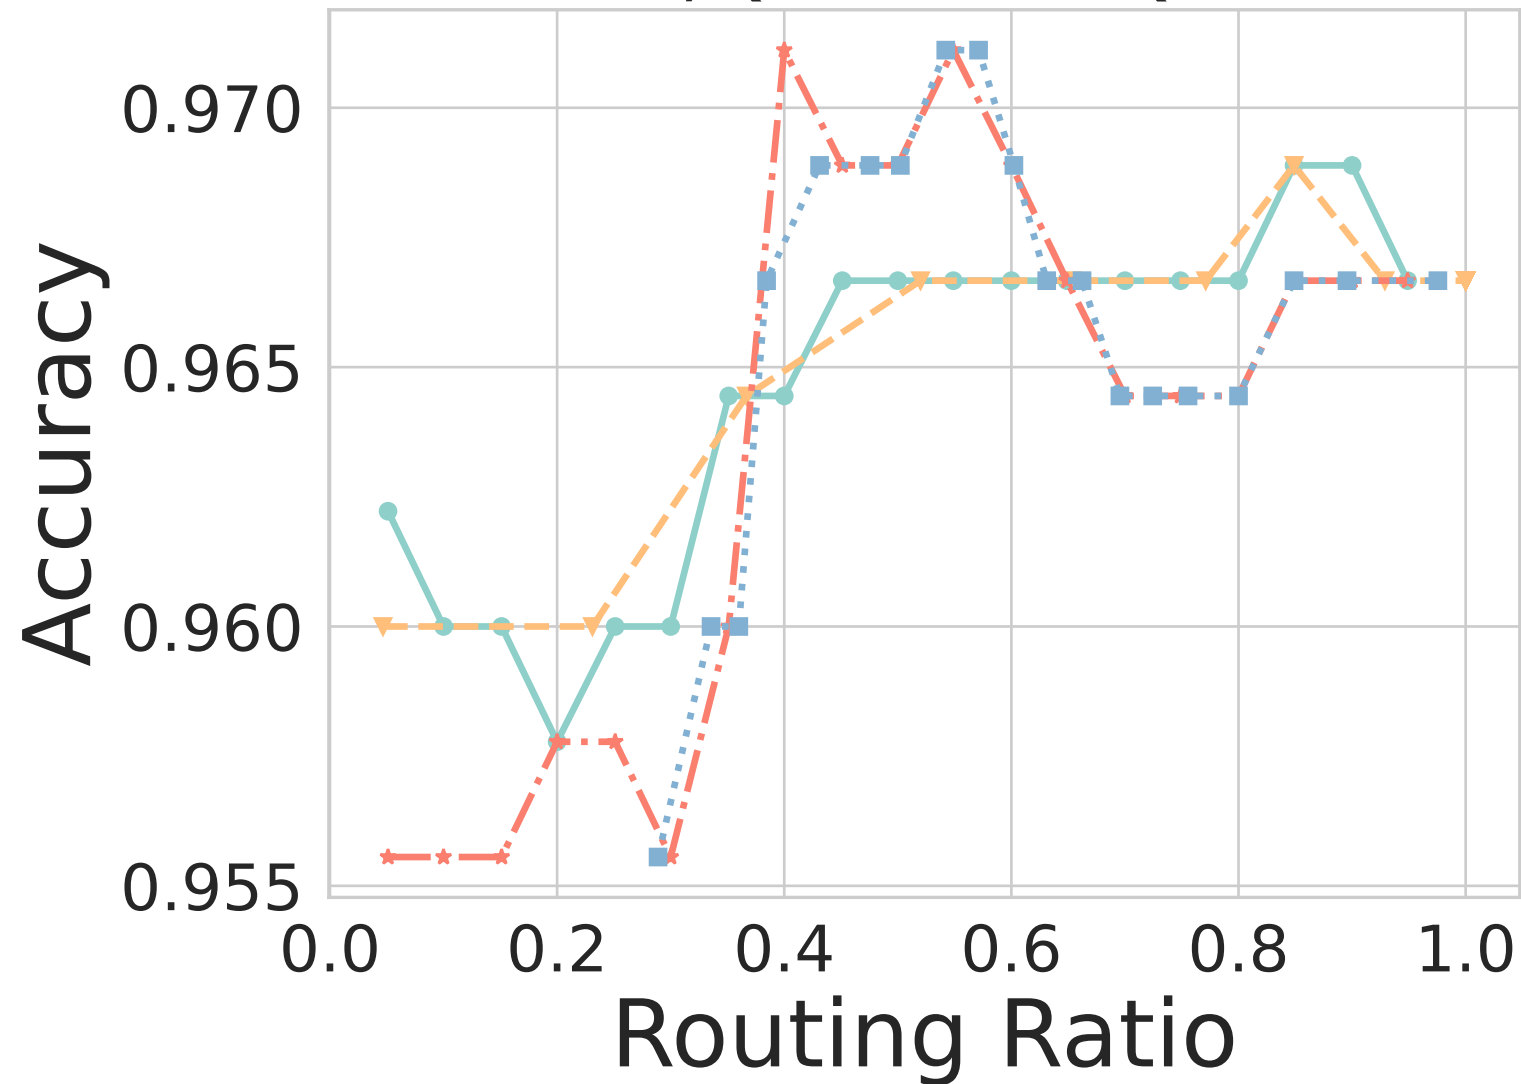

Supplement: supplementary_material [file cali_down_math_500_Qwen3-4B_Qwen_Qwen3-32B.pdf › Routing_SLM_LLMs/Proxy_routing_prediction/to_Qwen_Qwen3-32B/math_500_as_downstream/cali_down_math_500_Qwen3-4B_Qwen_Qwen3-32B.pdf]

**MATH-500, granite-3.1-8b to Qwen3-32B**

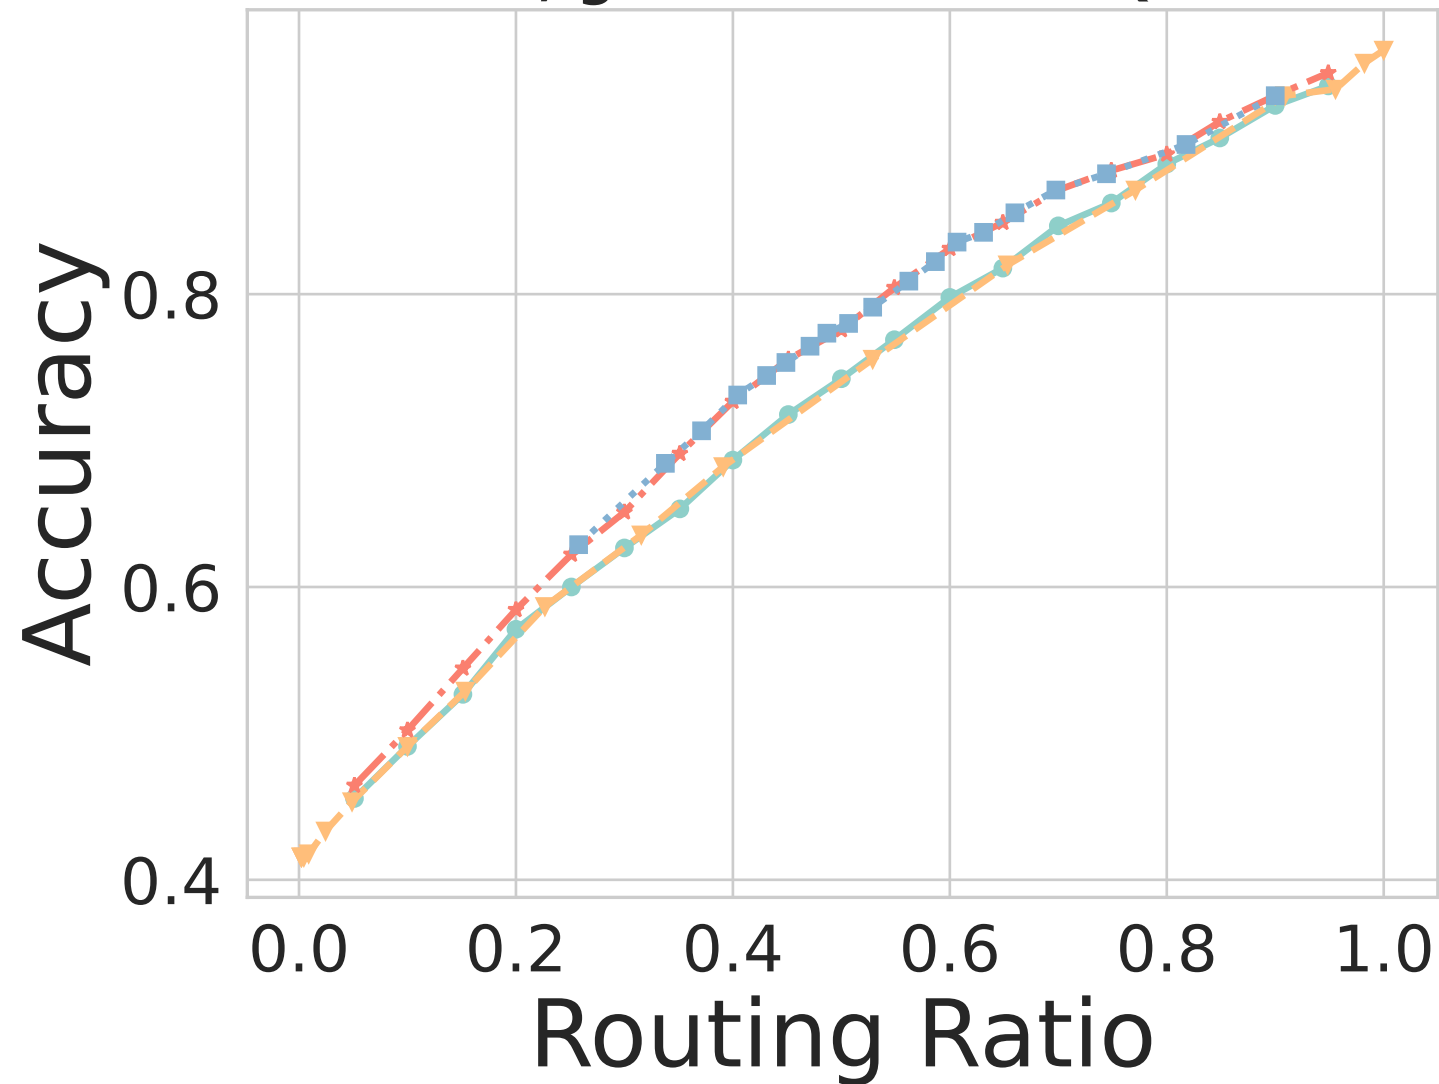

Supplement: supplementary_material [file cali_down_math_500_granite-3.1-8b_Qwen_Qwen3-32B.pdf › Routing_SLM_LLMs/Proxy_routing_prediction/to_Qwen_Qwen3-32B/math_500_as_downstream/cali_down_math_500_granite-3.1-8b_Qwen_Qwen3-32B.pdf]

**MATH-500, llama-3.1-8b to Qwen3-32B**

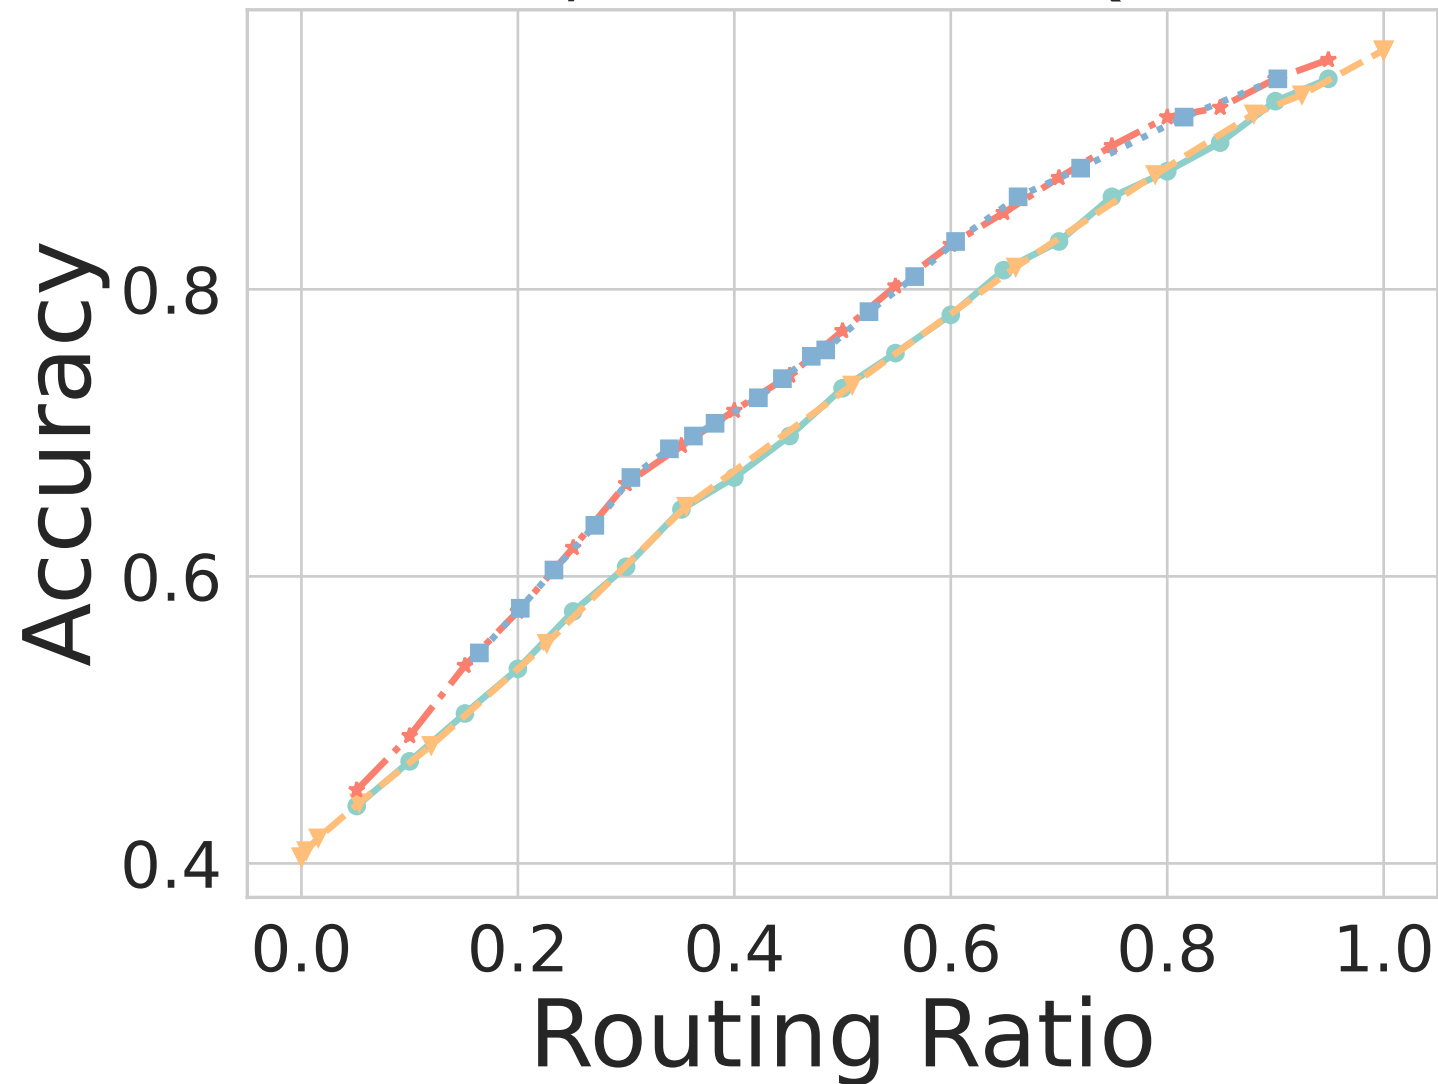

Supplement: supplementary_material [file cali_down_math_500_llama-3.1-8b_Qwen_Qwen3-32B.pdf › Routing_SLM_LLMs/Proxy_routing_prediction/to_Qwen_Qwen3-32B/math_500_as_downstream/cali_down_math_500_llama-3.1-8b_Qwen_Qwen3-32B.pdf]

**MATH-500, llama-3.2-1b to Qwen3-32B**

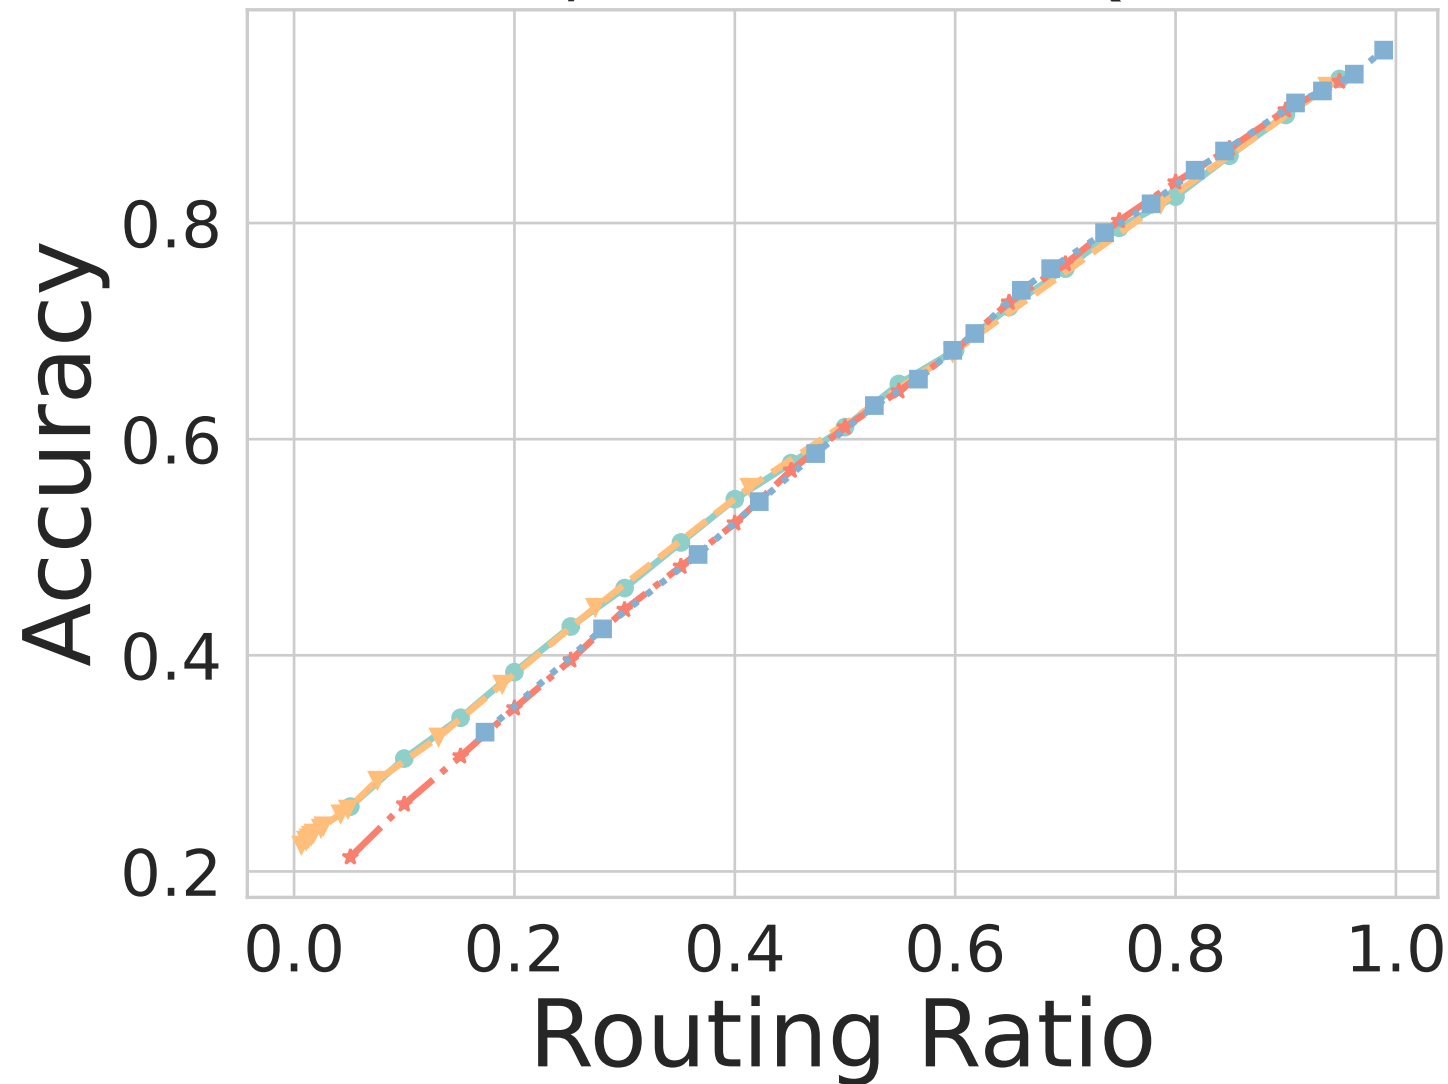

Supplement: supplementary_material [file cali_down_math_500_llama-3.2-1b_Qwen_Qwen3-32B.pdf › Routing_SLM_LLMs/Proxy_routing_prediction/to_Qwen_Qwen3-32B/math_500_as_downstream/cali_down_math_500_llama-3.2-1b_Qwen_Qwen3-32B.pdf]

**MATH-500, llama-3.2-3b to Qwen3-32B**

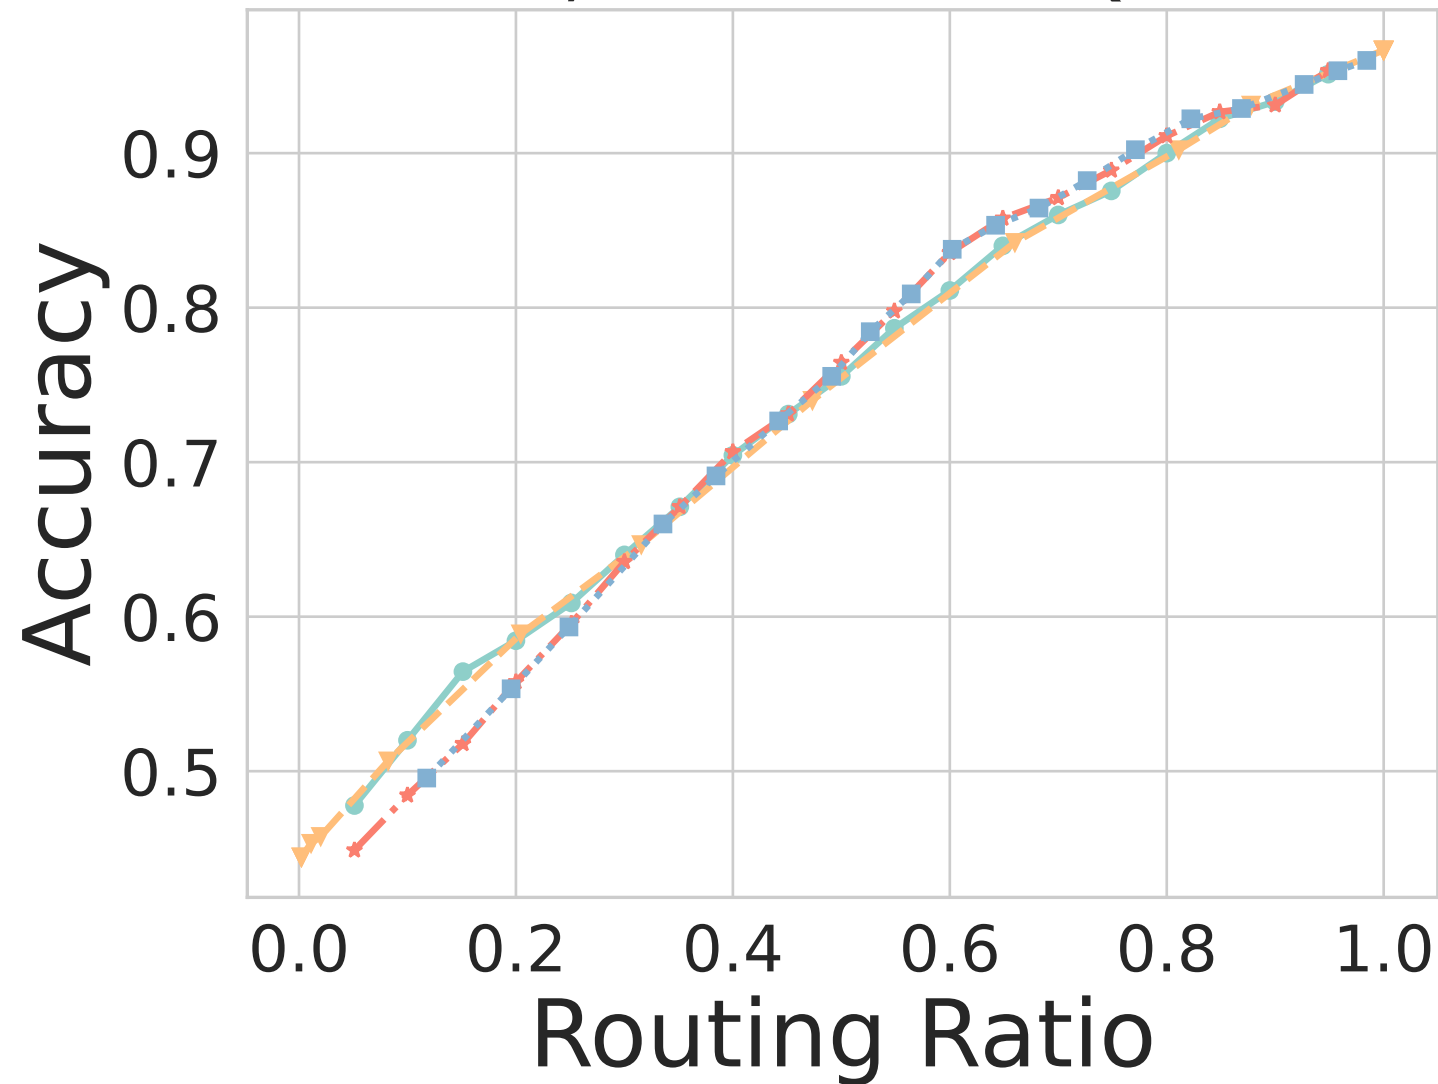

Supplement: supplementary_material [file cali_down_math_500_llama-3.2-3b_Qwen_Qwen3-32B.pdf › Routing_SLM_LLMs/Proxy_routing_prediction/to_Qwen_Qwen3-32B/math_500_as_downstream/cali_down_math_500_llama-3.2-3b_Qwen_Qwen3-32B.pdf]

**MATH-500, mistral-7b to Qwen3-32B**

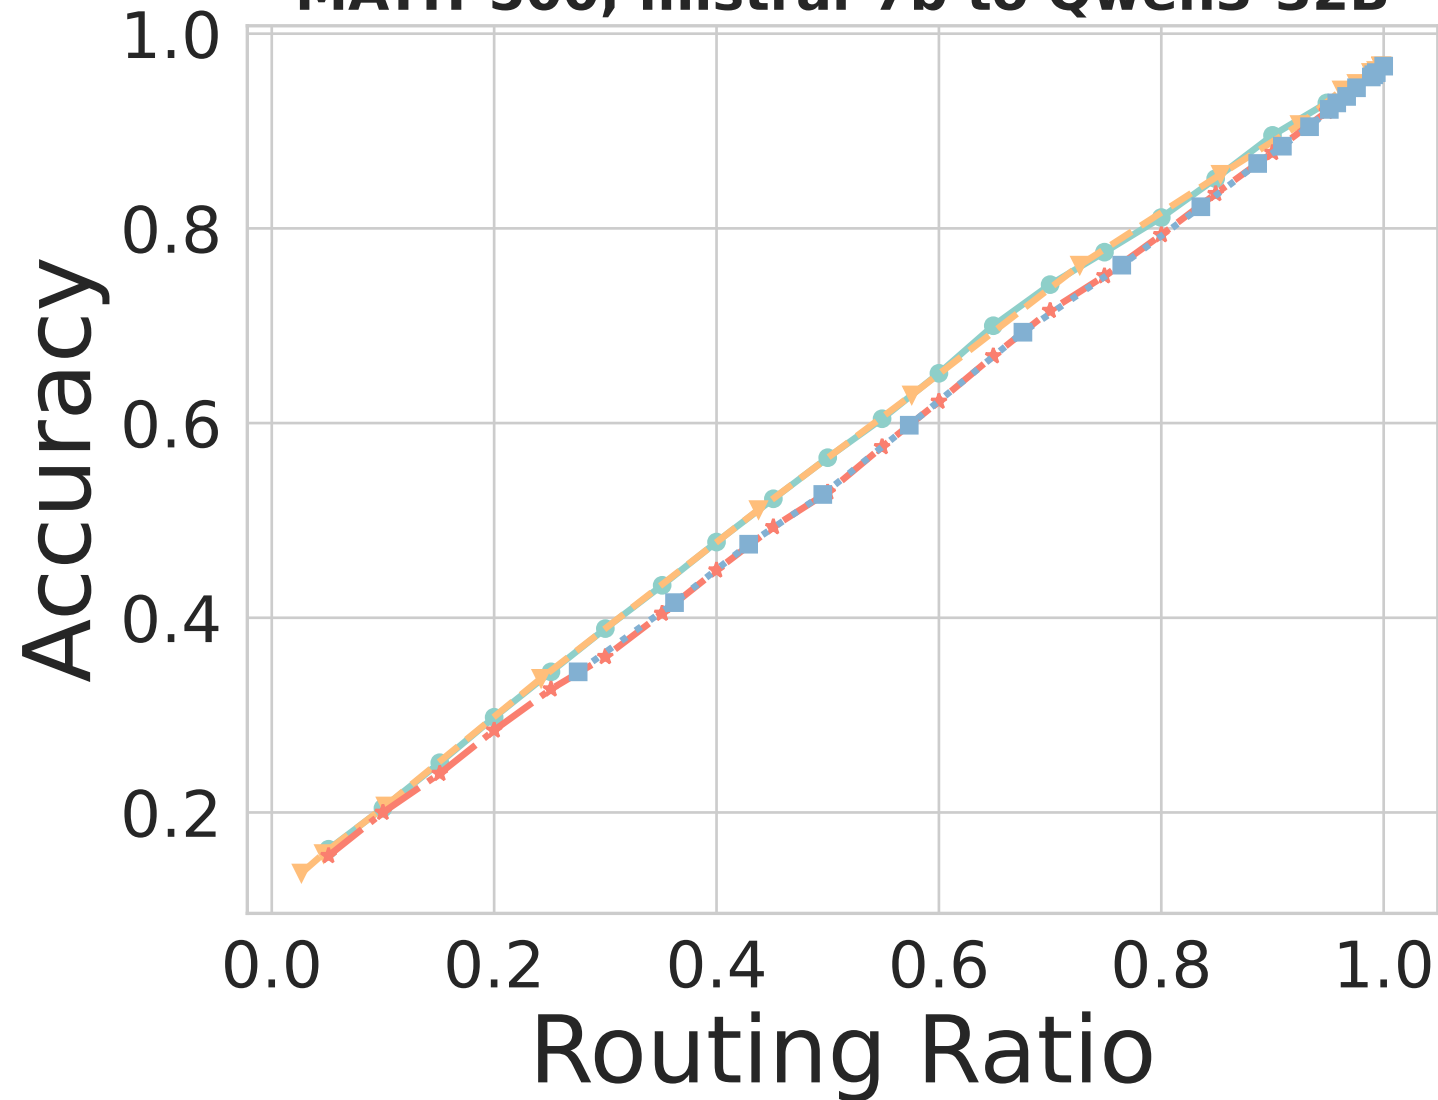

Supplement: supplementary_material [file cali_down_math_500_mistral-7b_Qwen_Qwen3-32B.pdf › Routing_SLM_LLMs/Proxy_routing_prediction/to_Qwen_Qwen3-32B/math_500_as_downstream/cali_down_math_500_mistral-7b_Qwen_Qwen3-32B.pdf]

**MATH-500, phi-3.5-mini to Qwen3-32B**

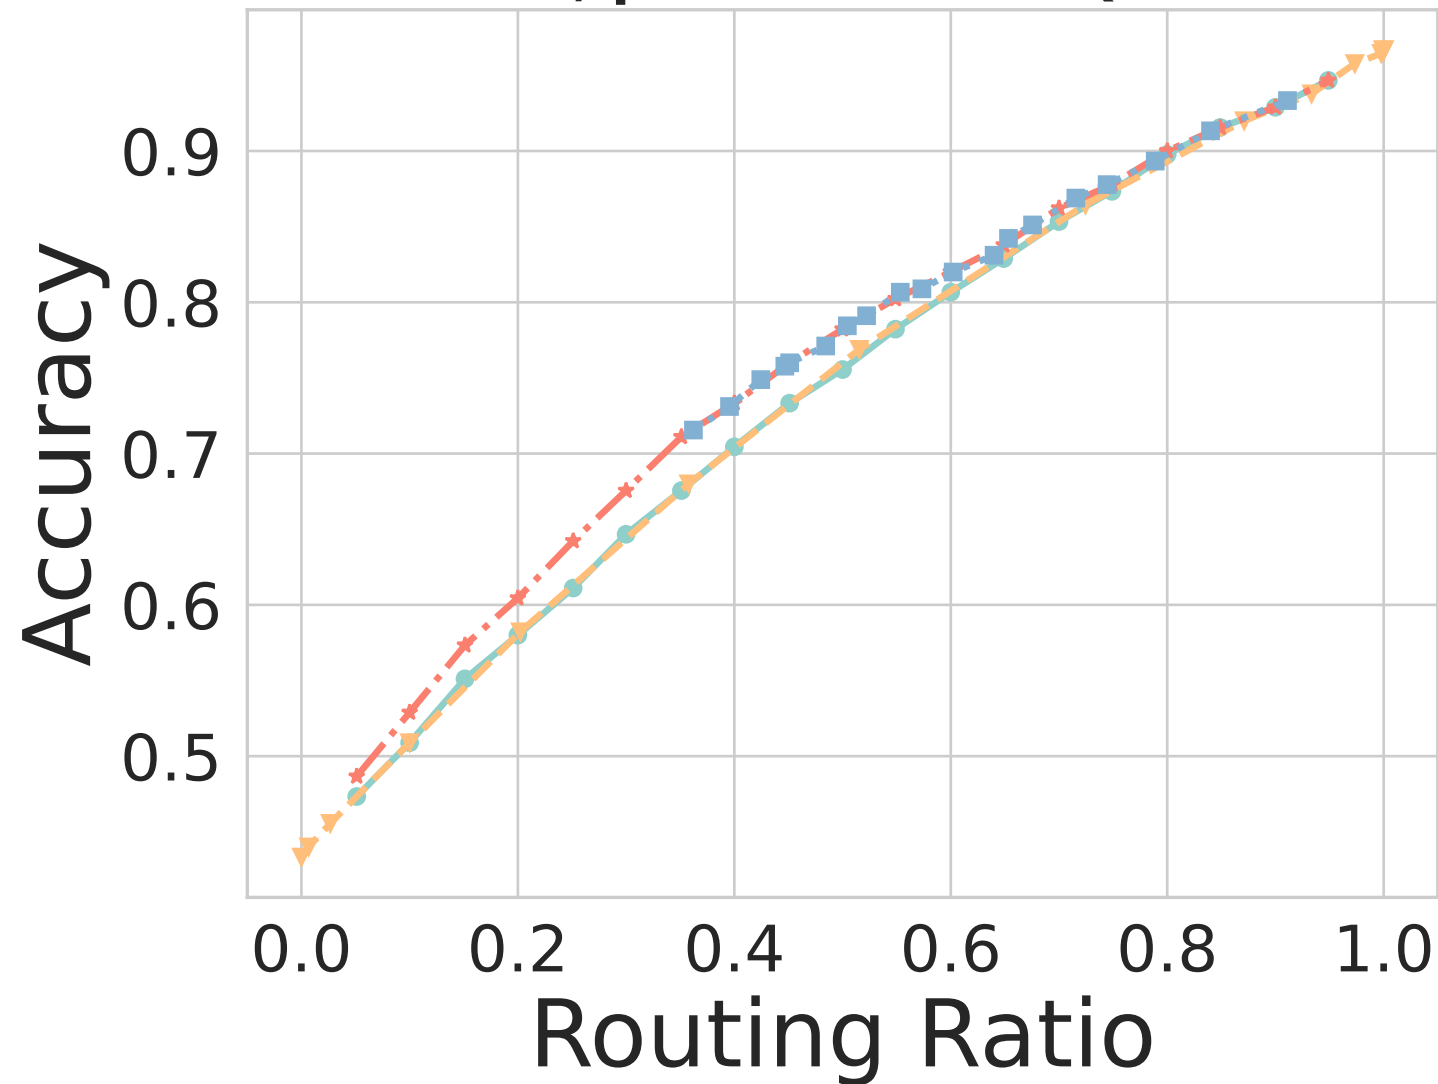

Supplement: supplementary_material [file cali_down_math_500_phi-3.5-mini_Qwen_Qwen3-32B.pdf › Routing_SLM_LLMs/Proxy_routing_prediction/to_Qwen_Qwen3-32B/math_500_as_downstream/cali_down_math_500_phi-3.5-mini_Qwen_Qwen3-32B.pdf]

**MATH-500, phi-4-mini-reasoning to Qwen3-32B**

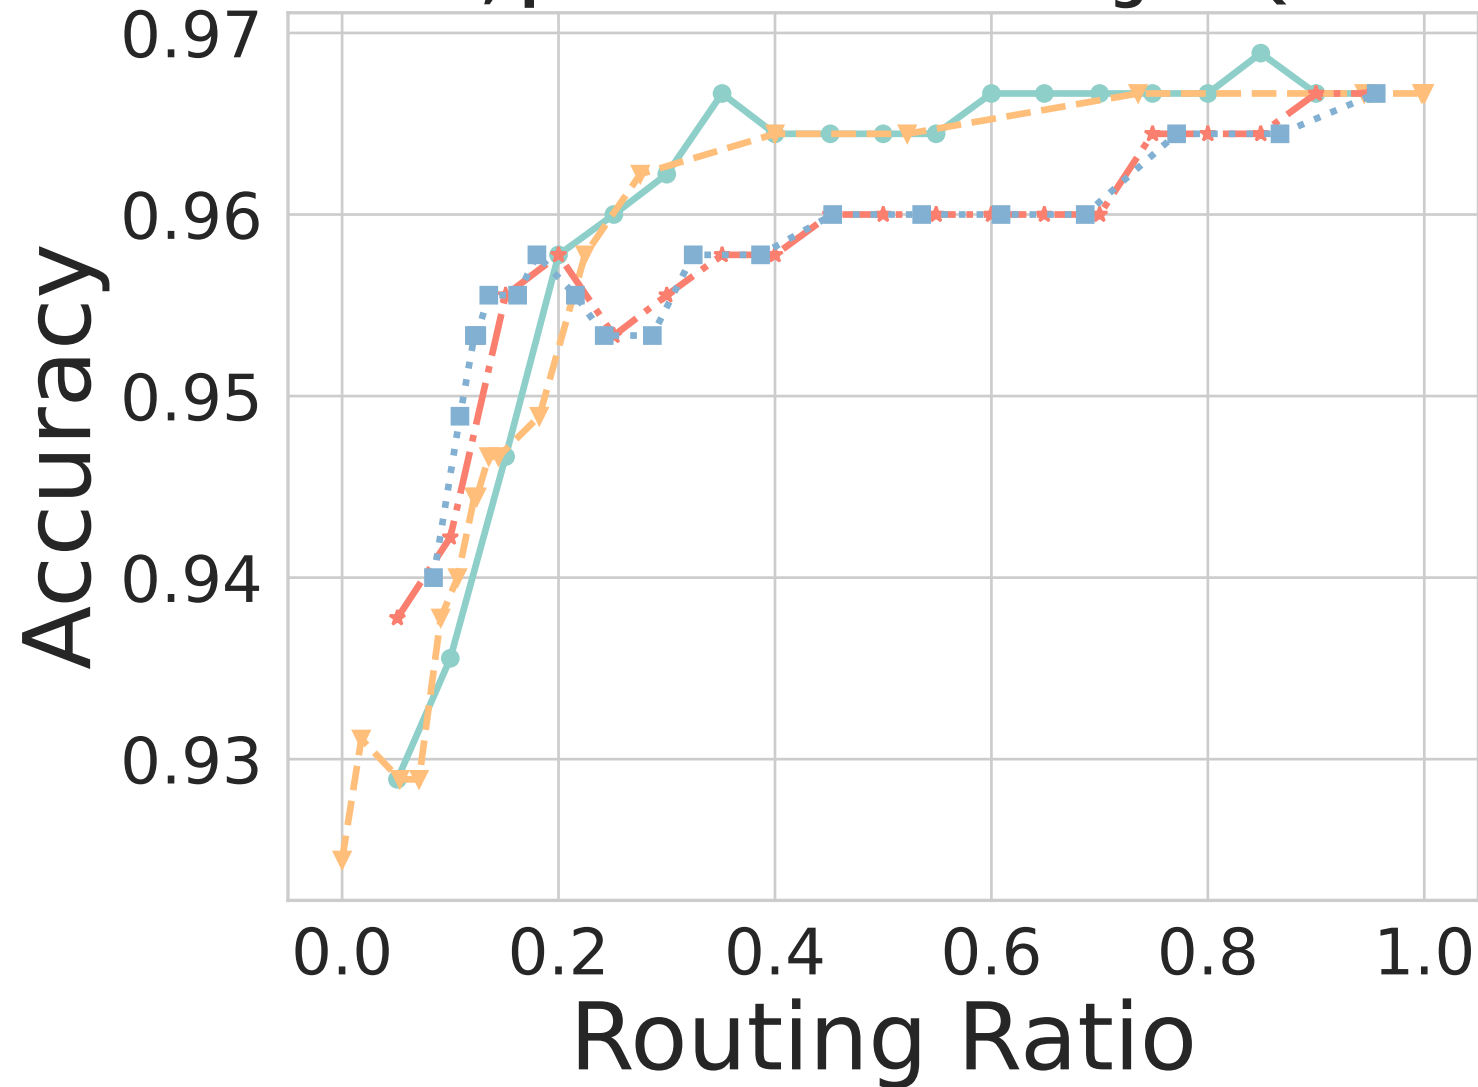

Supplement: supplementary_material [file cali_down_math_500_phi-4-mini-reasoning_Qwen_Qwen3-32B.pdf › Routing_SLM_LLMs/Proxy_routing_prediction/to_Qwen_Qwen3-32B/math_500_as_downstream/cali_down_math_500_phi-4-mini-reasoning_Qwen_Qwen3-32B.pdf]

**MATH-500, qwen-2.5-7b to Qwen3-32B**

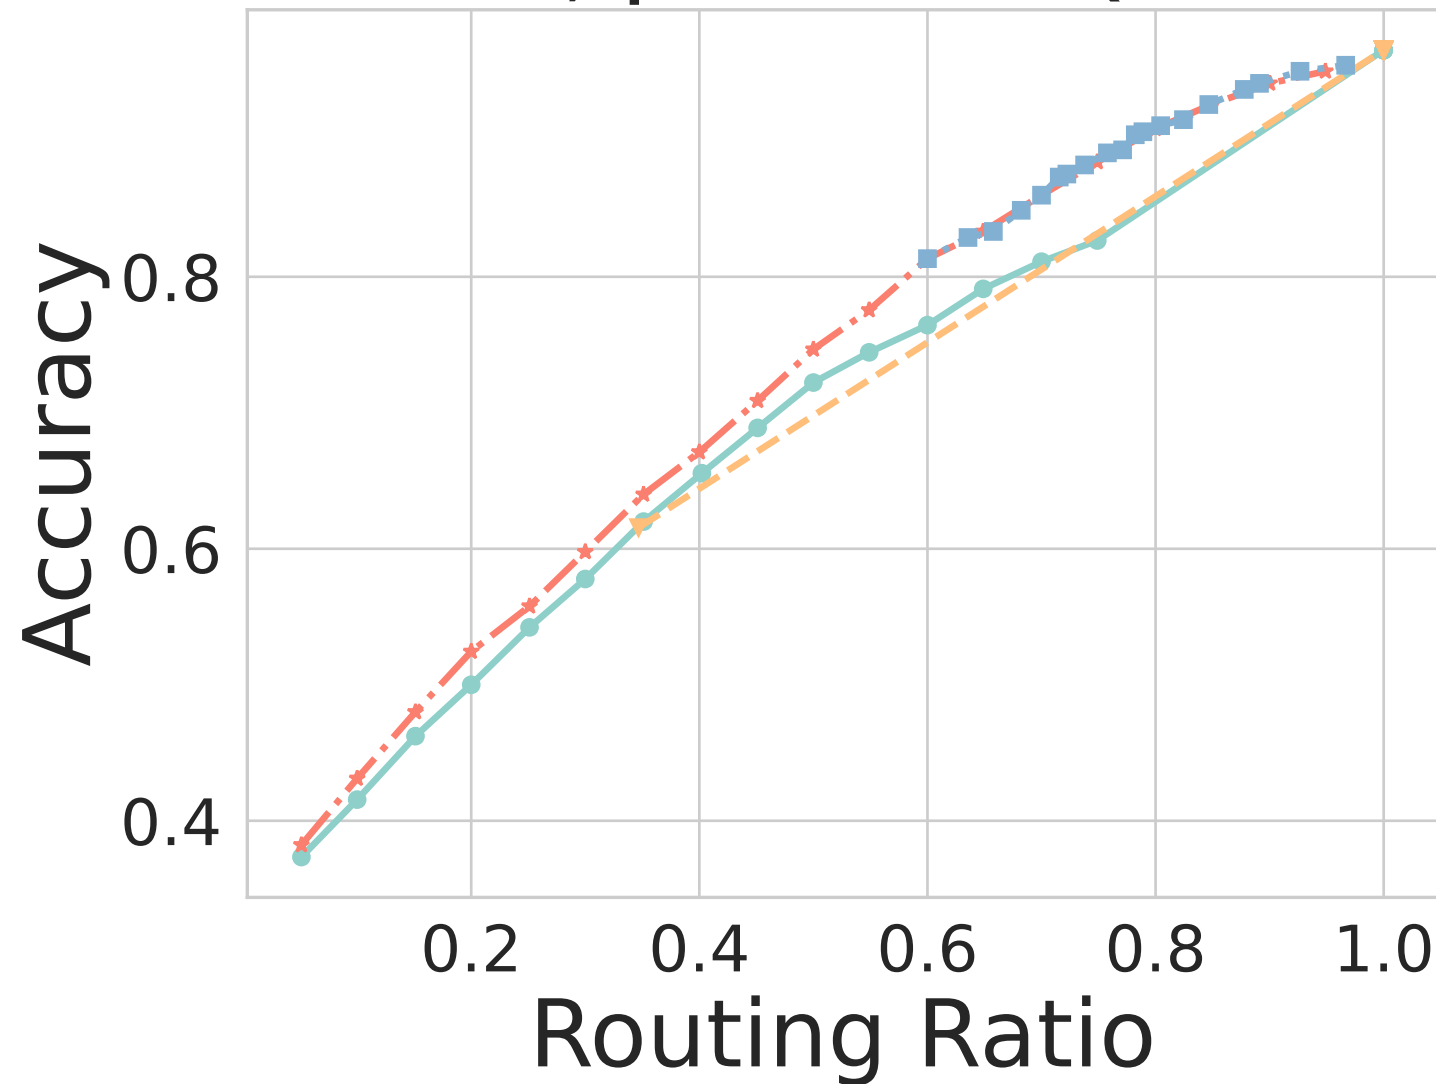

Supplement: supplementary_material [file cali_down_math_500_qwen-2.5-7b_Qwen_Qwen3-32B.pdf › Routing_SLM_LLMs/Proxy_routing_prediction/to_Qwen_Qwen3-32B/math_500_as_downstream/cali_down_math_500_qwen-2.5-7b_Qwen_Qwen3-32B.pdf]

**MATH-500, rwkv to Qwen3-32B**

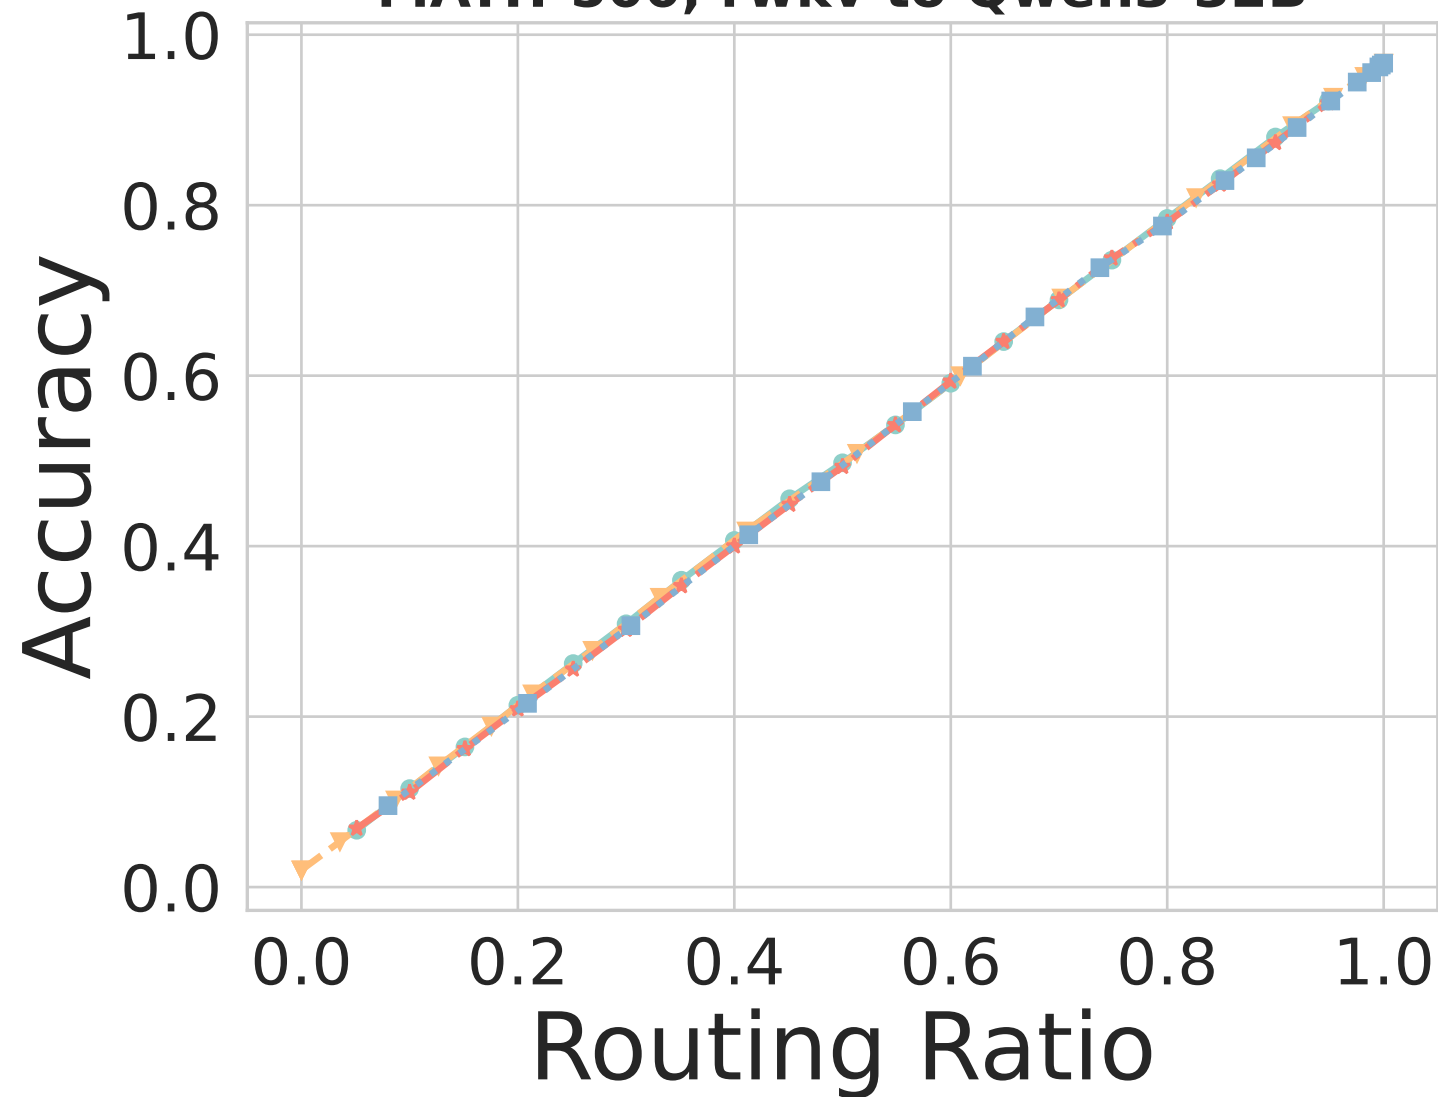

Supplement: supplementary_material [file cali_down_math_500_rwkv_Qwen_Qwen3-32B.pdf › Routing_SLM_LLMs/Proxy_routing_prediction/to_Qwen_Qwen3-32B/math_500_as_downstream/cali_down_math_500_rwkv_Qwen_Qwen3-32B.pdf]

**MMLU, Qwen3-0.6B to Qwen3-32B**

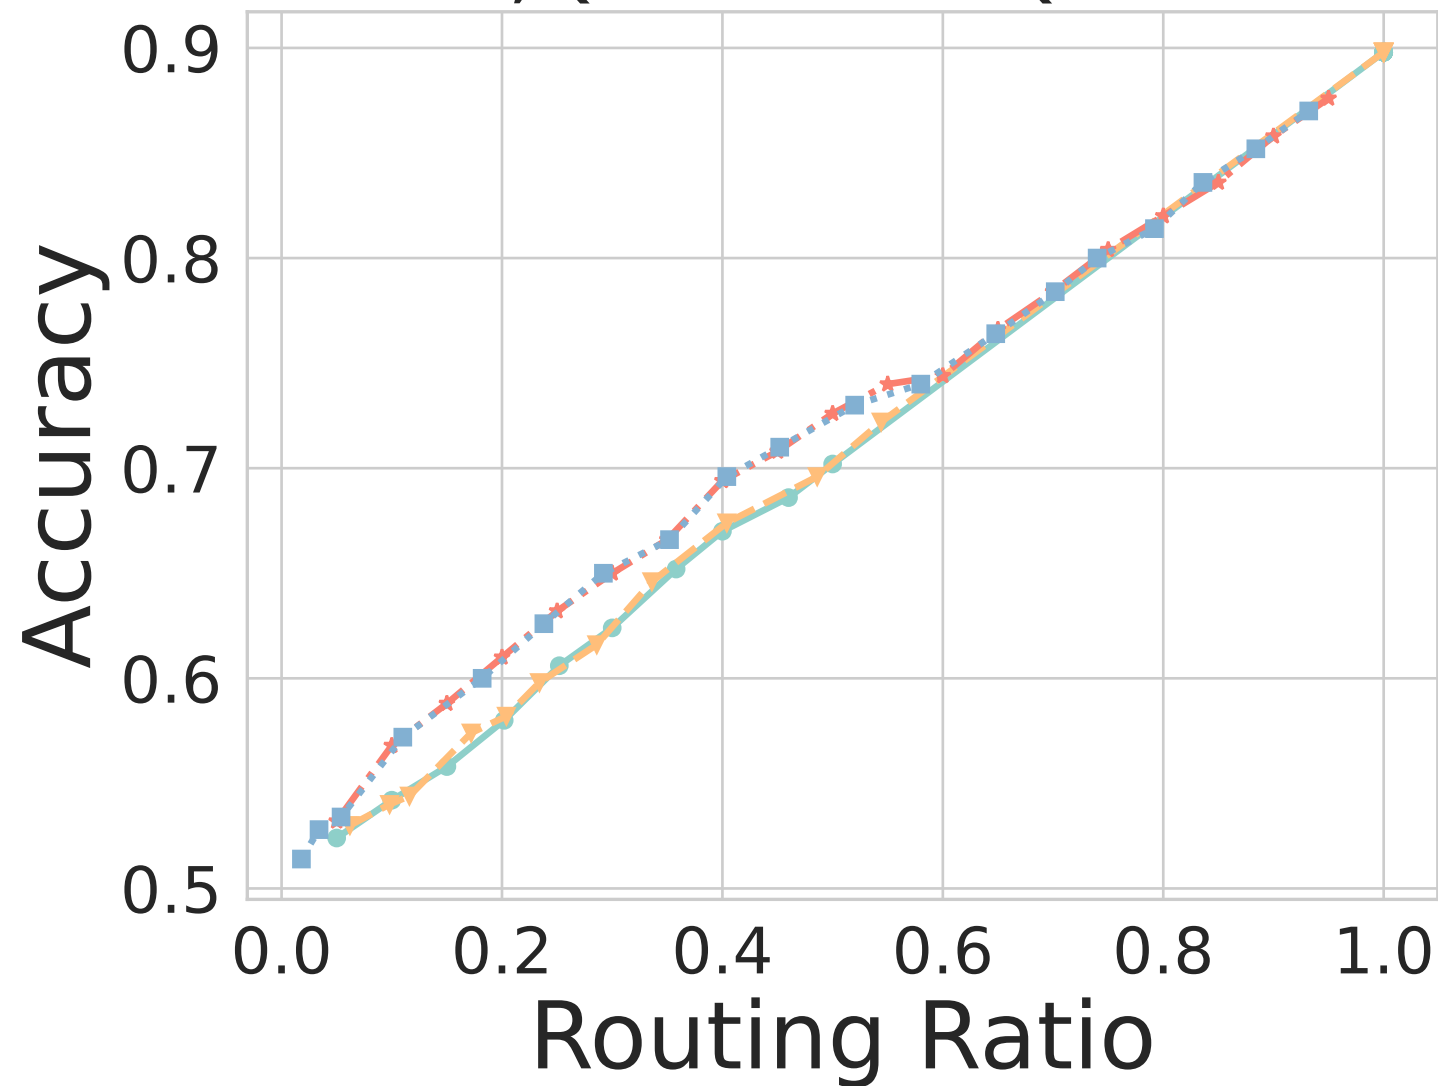

Supplement: supplementary_material [file cali_down_mmlu_Qwen3-0.6B_Qwen_Qwen3-32B.pdf › Routing_SLM_LLMs/Proxy_routing_prediction/to_Qwen_Qwen3-32B/mmlu_as_downstream/cali_down_mmlu_Qwen3-0.6B_Qwen_Qwen3-32B.pdf]

**MMLU, Qwen3-1.7B to Qwen3-32B**

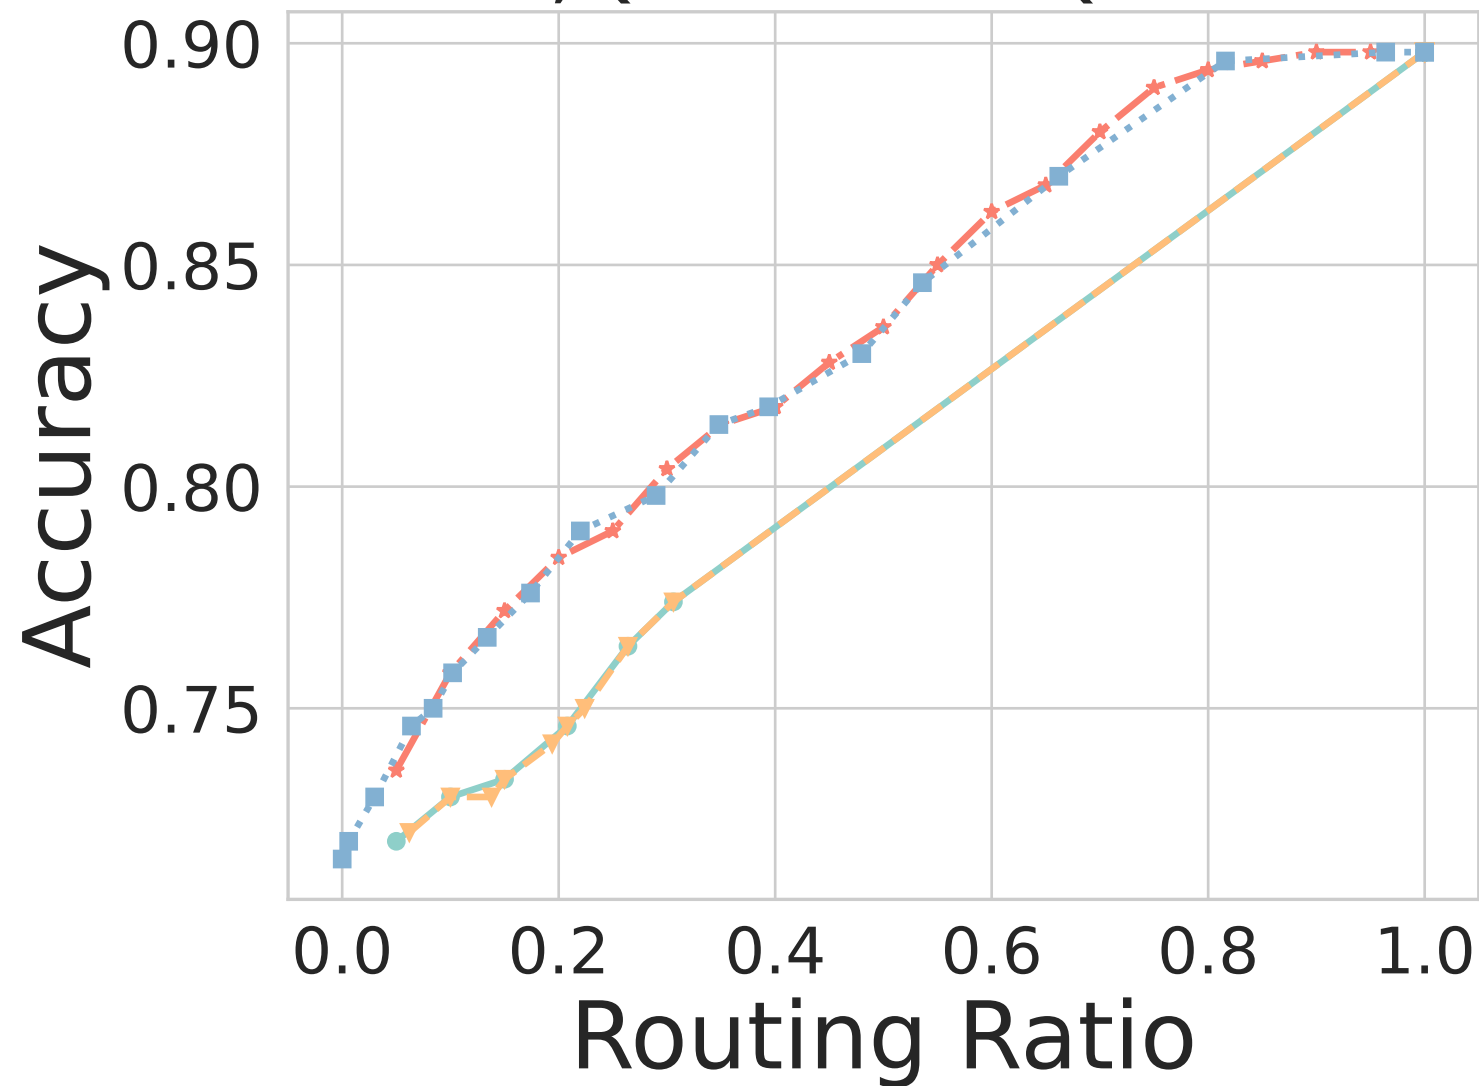

Supplement: supplementary_material [file cali_down_mmlu_Qwen3-1.7B_Qwen_Qwen3-32B.pdf › Routing_SLM_LLMs/Proxy_routing_prediction/to_Qwen_Qwen3-32B/mmlu_as_downstream/cali_down_mmlu_Qwen3-1.7B_Qwen_Qwen3-32B.pdf]

**MMLU, Qwen3-4B to Qwen3-32B**

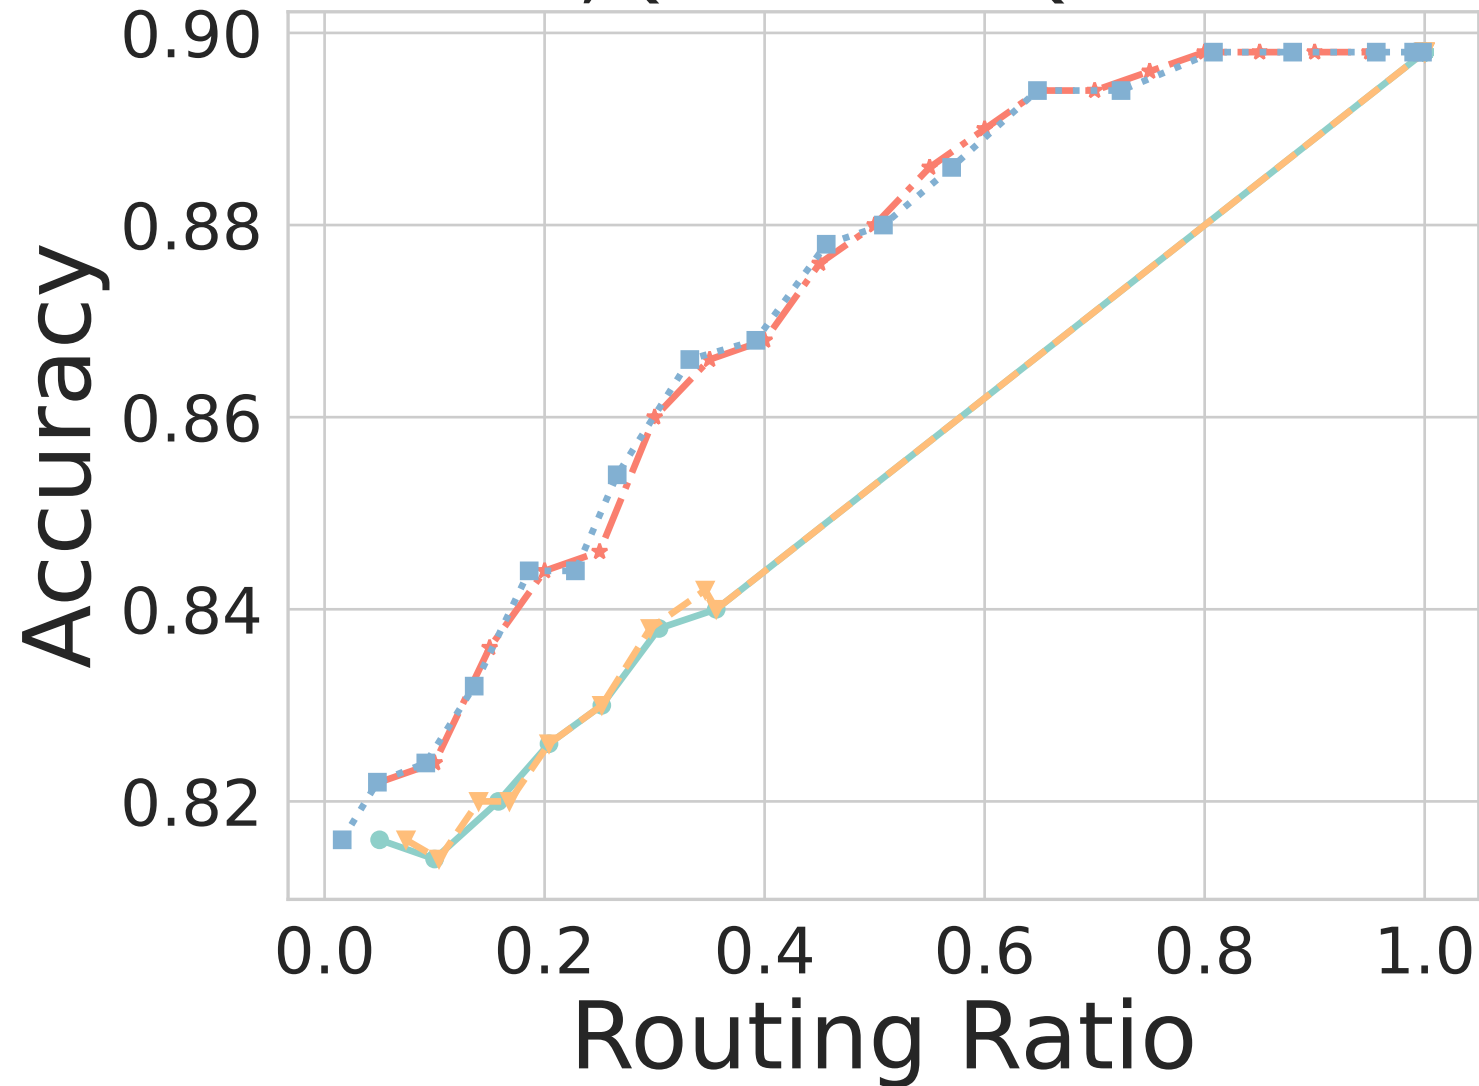

Supplement: supplementary_material [file cali_down_mmlu_Qwen3-4B_Qwen_Qwen3-32B.pdf › Routing_SLM_LLMs/Proxy_routing_prediction/to_Qwen_Qwen3-32B/mmlu_as_downstream/cali_down_mmlu_Qwen3-4B_Qwen_Qwen3-32B.pdf]

**MMLU, granite-3.1-8b to Qwen3-32B**

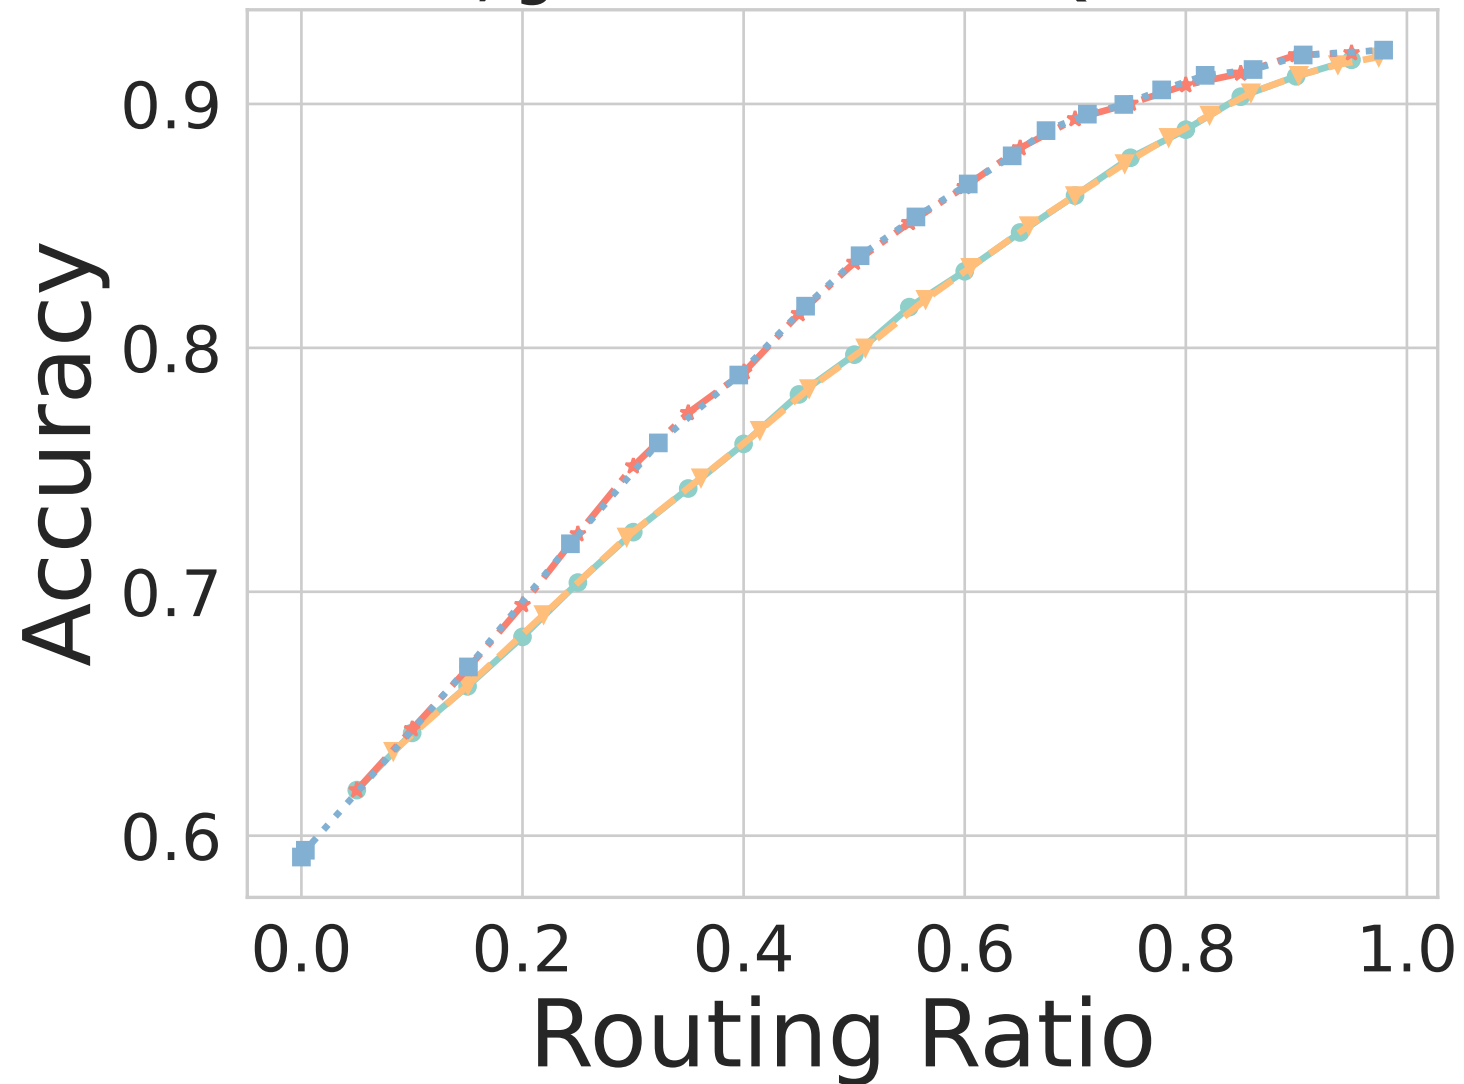

Supplement: supplementary_material [file cali_down_mmlu_granite-3.1-8b_Qwen_Qwen3-32B.pdf › Routing_SLM_LLMs/Proxy_routing_prediction/to_Qwen_Qwen3-32B/mmlu_as_downstream/cali_down_mmlu_granite-3.1-8b_Qwen_Qwen3-32B.pdf]

**MMLU, llama-3.1-8b to Qwen3-32B**

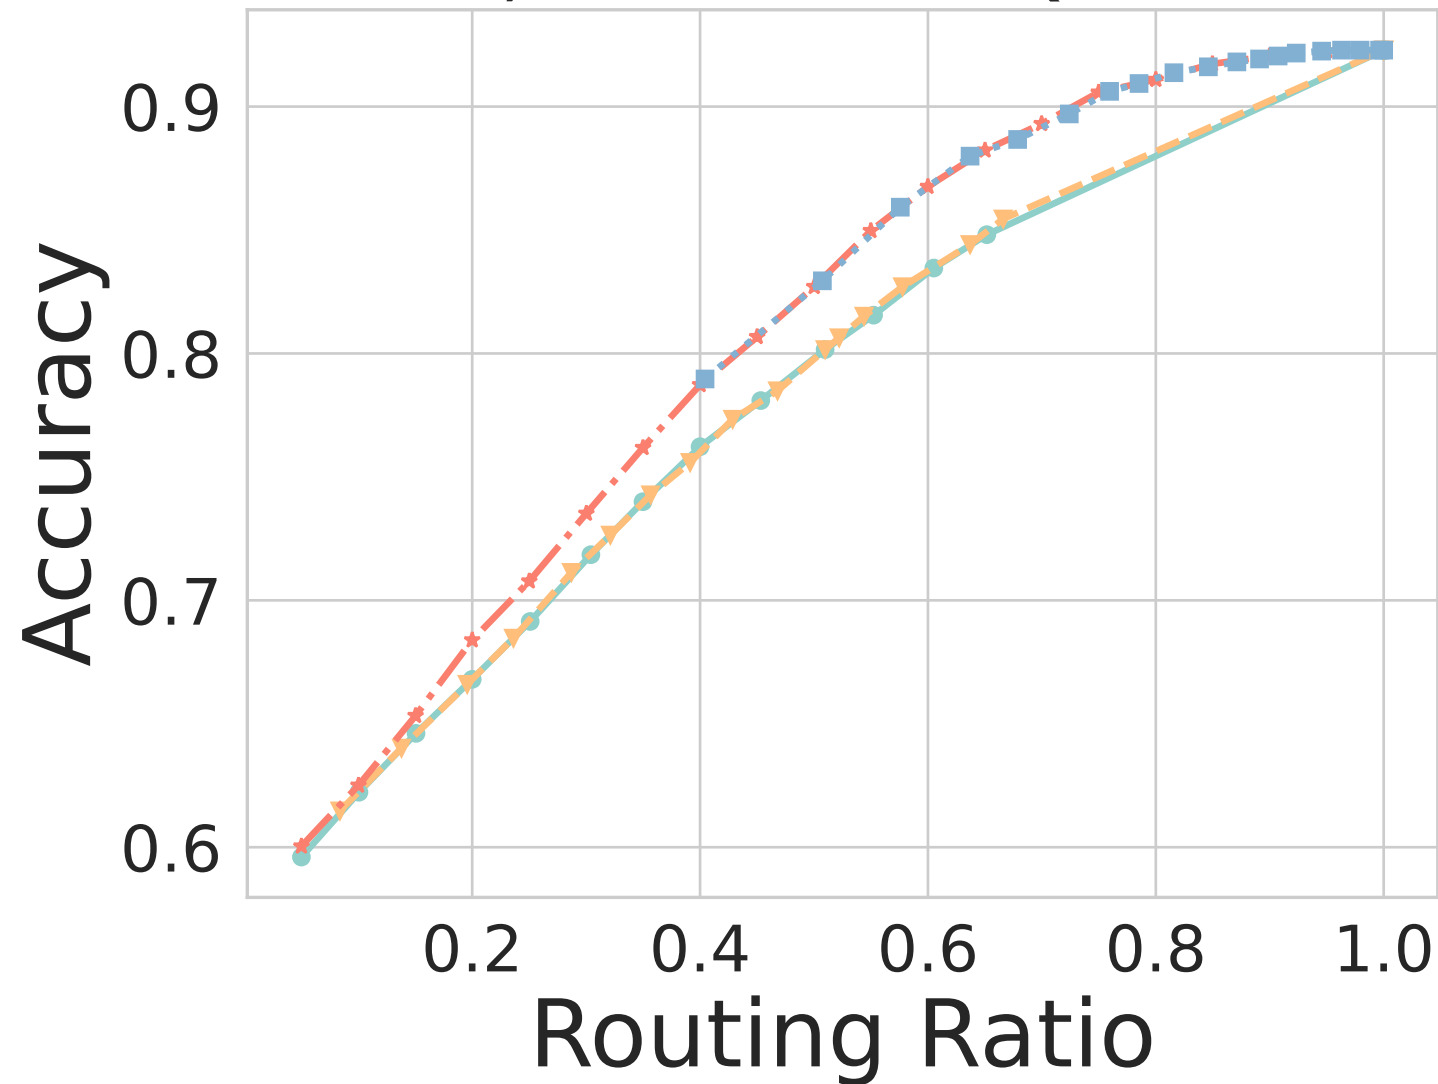

Supplement: supplementary_material [file cali_down_mmlu_llama-3.1-8b_Qwen_Qwen3-32B.pdf › Routing_SLM_LLMs/Proxy_routing_prediction/to_Qwen_Qwen3-32B/mmlu_as_downstream/cali_down_mmlu_llama-3.1-8b_Qwen_Qwen3-32B.pdf]

**MMLU, llama-3.2-1b to Qwen3-32B**

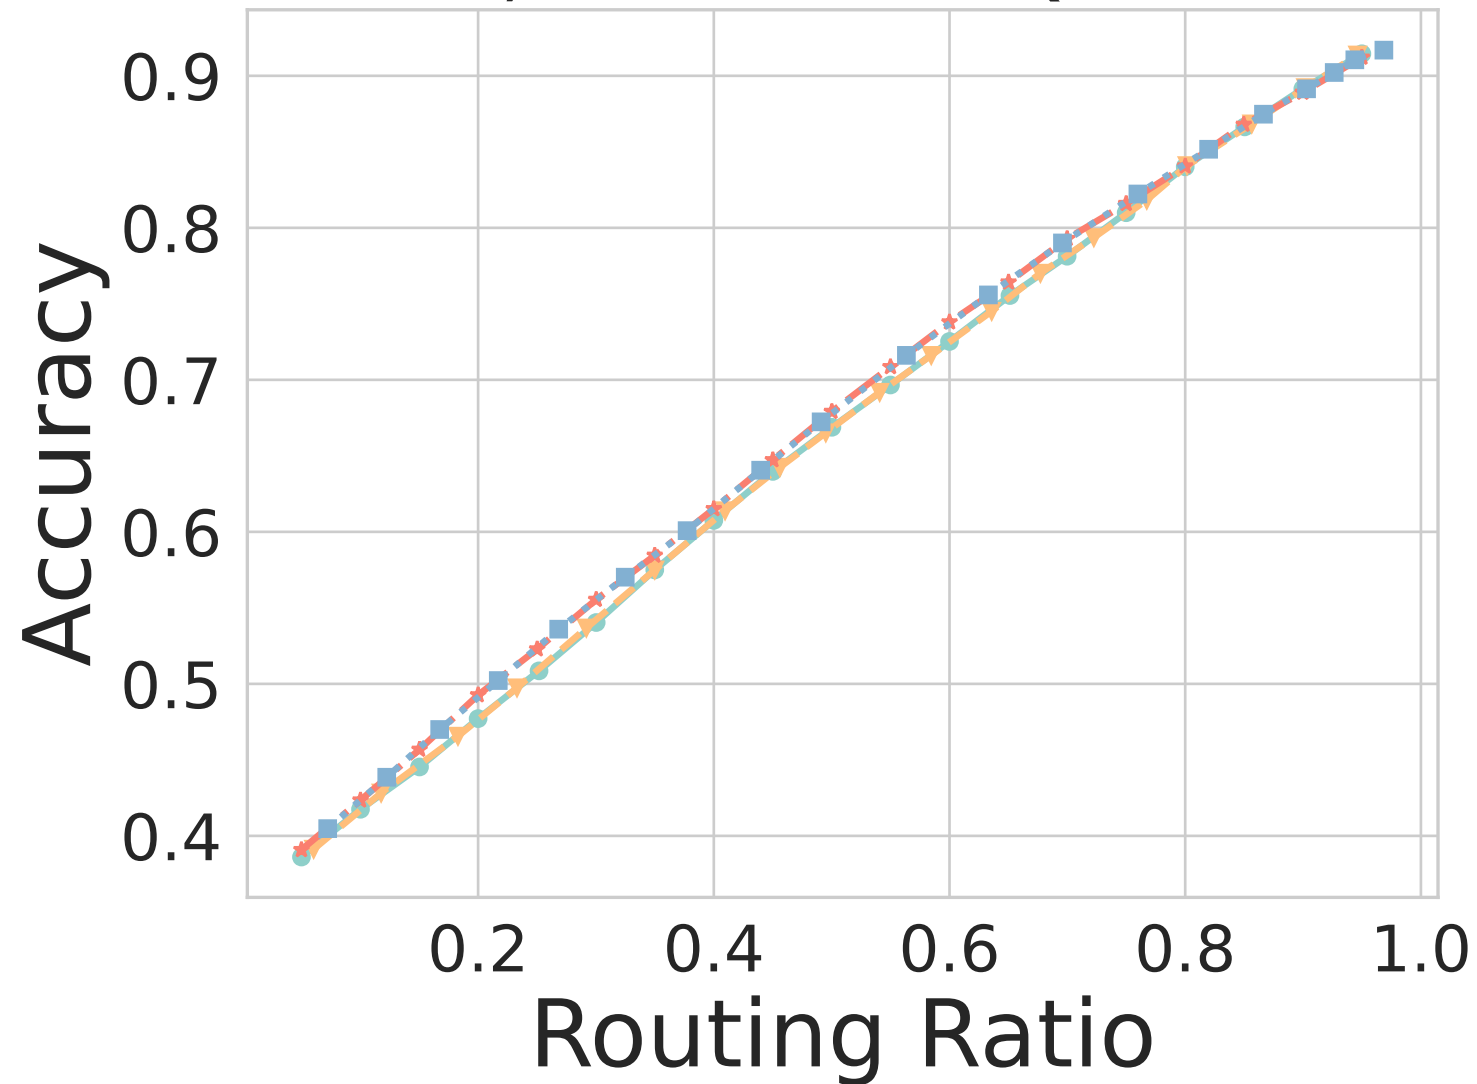

Supplement: supplementary_material [file cali_down_mmlu_llama-3.2-1b_Qwen_Qwen3-32B.pdf › Routing_SLM_LLMs/Proxy_routing_prediction/to_Qwen_Qwen3-32B/mmlu_as_downstream/cali_down_mmlu_llama-3.2-1b_Qwen_Qwen3-32B.pdf]

**MMLU, llama-3.2-3b to Qwen3-32B**

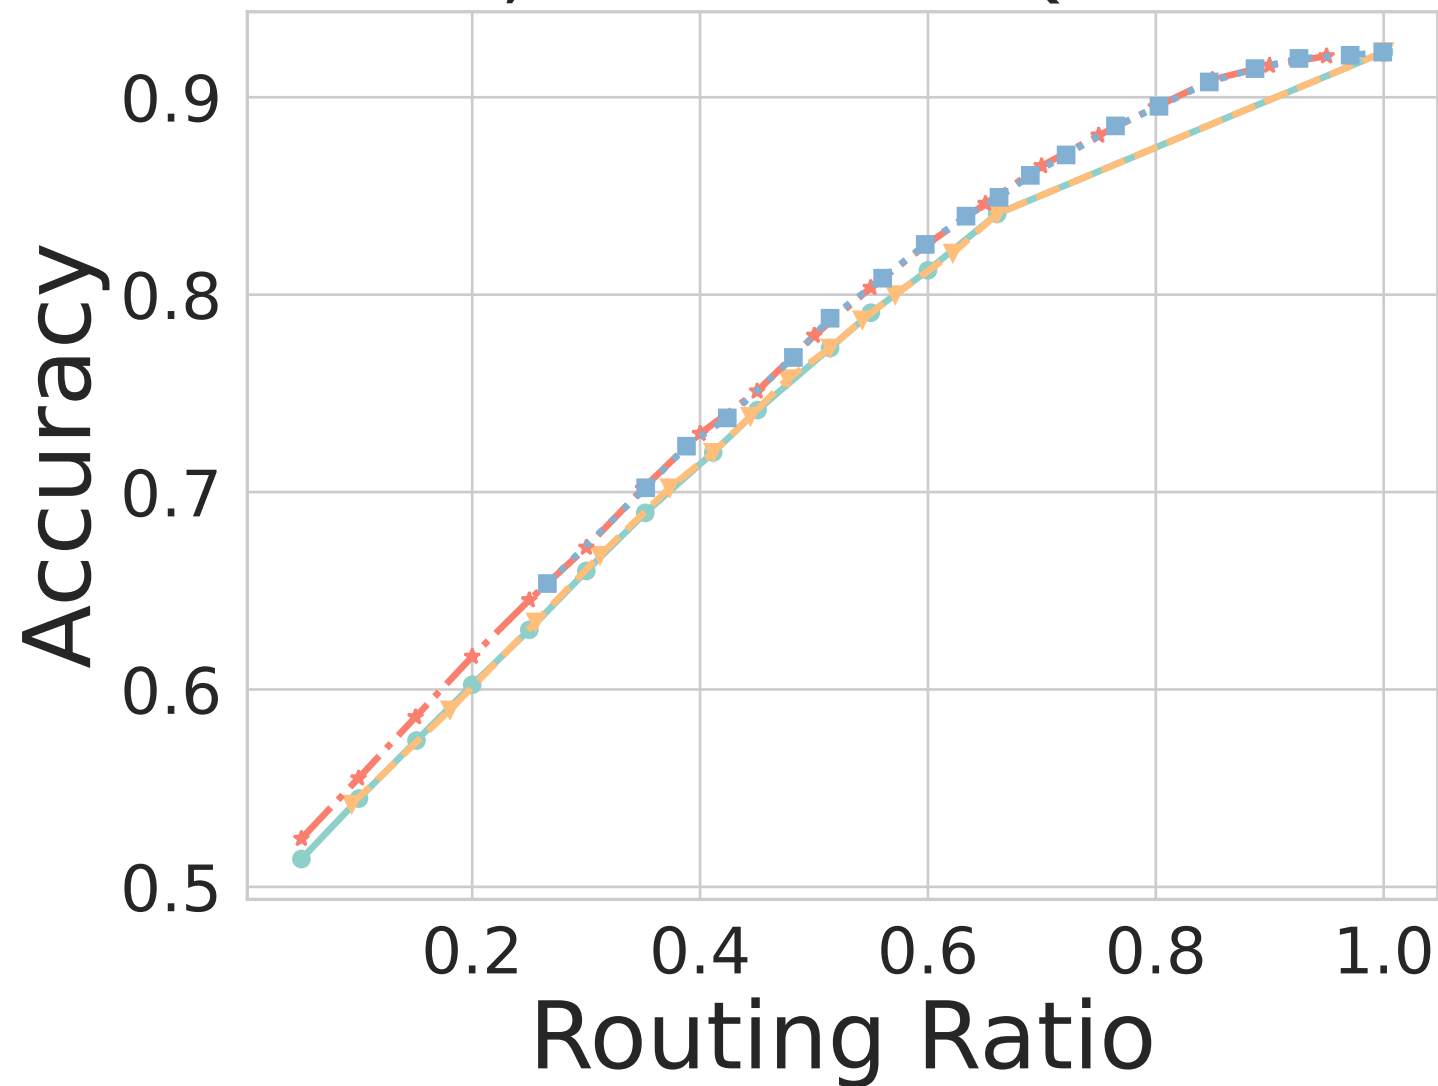

Supplement: supplementary_material [file cali_down_mmlu_llama-3.2-3b_Qwen_Qwen3-32B.pdf › Routing_SLM_LLMs/Proxy_routing_prediction/to_Qwen_Qwen3-32B/mmlu_as_downstream/cali_down_mmlu_llama-3.2-3b_Qwen_Qwen3-32B.pdf]

**MMLU, mistral-7b to Qwen3-32B**

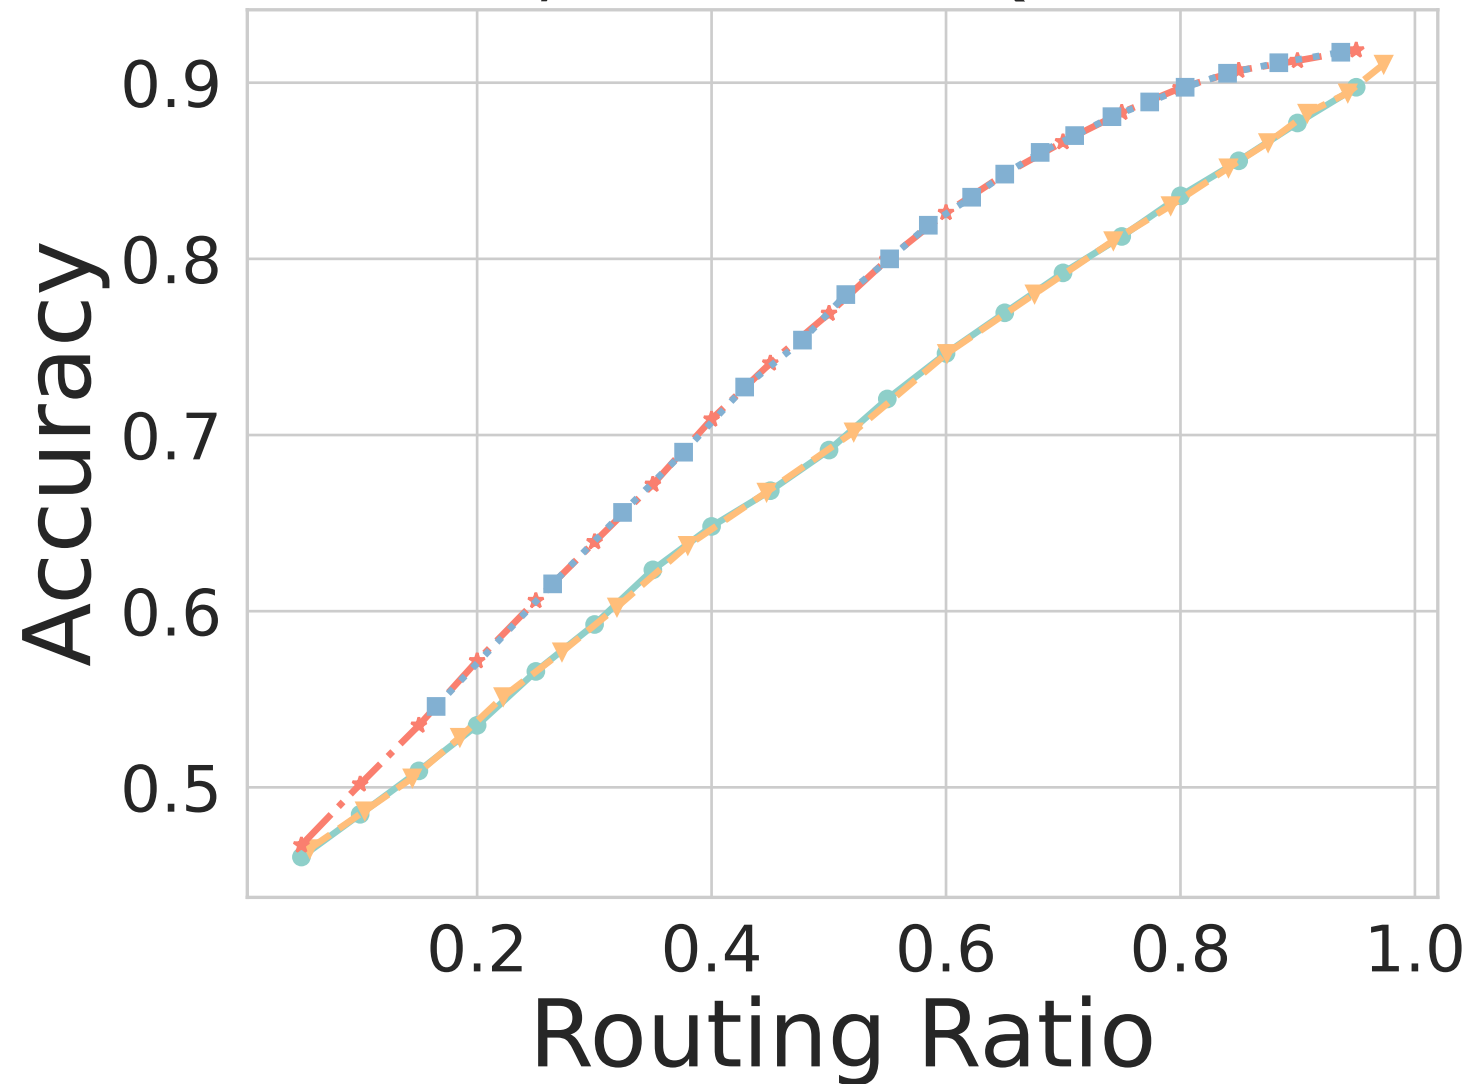

Supplement: supplementary_material [file cali_down_mmlu_mistral-7b_Qwen_Qwen3-32B.pdf › Routing_SLM_LLMs/Proxy_routing_prediction/to_Qwen_Qwen3-32B/mmlu_as_downstream/cali_down_mmlu_mistral-7b_Qwen_Qwen3-32B.pdf]

**MMLU, phi-3.5-mini to Qwen3-32B**

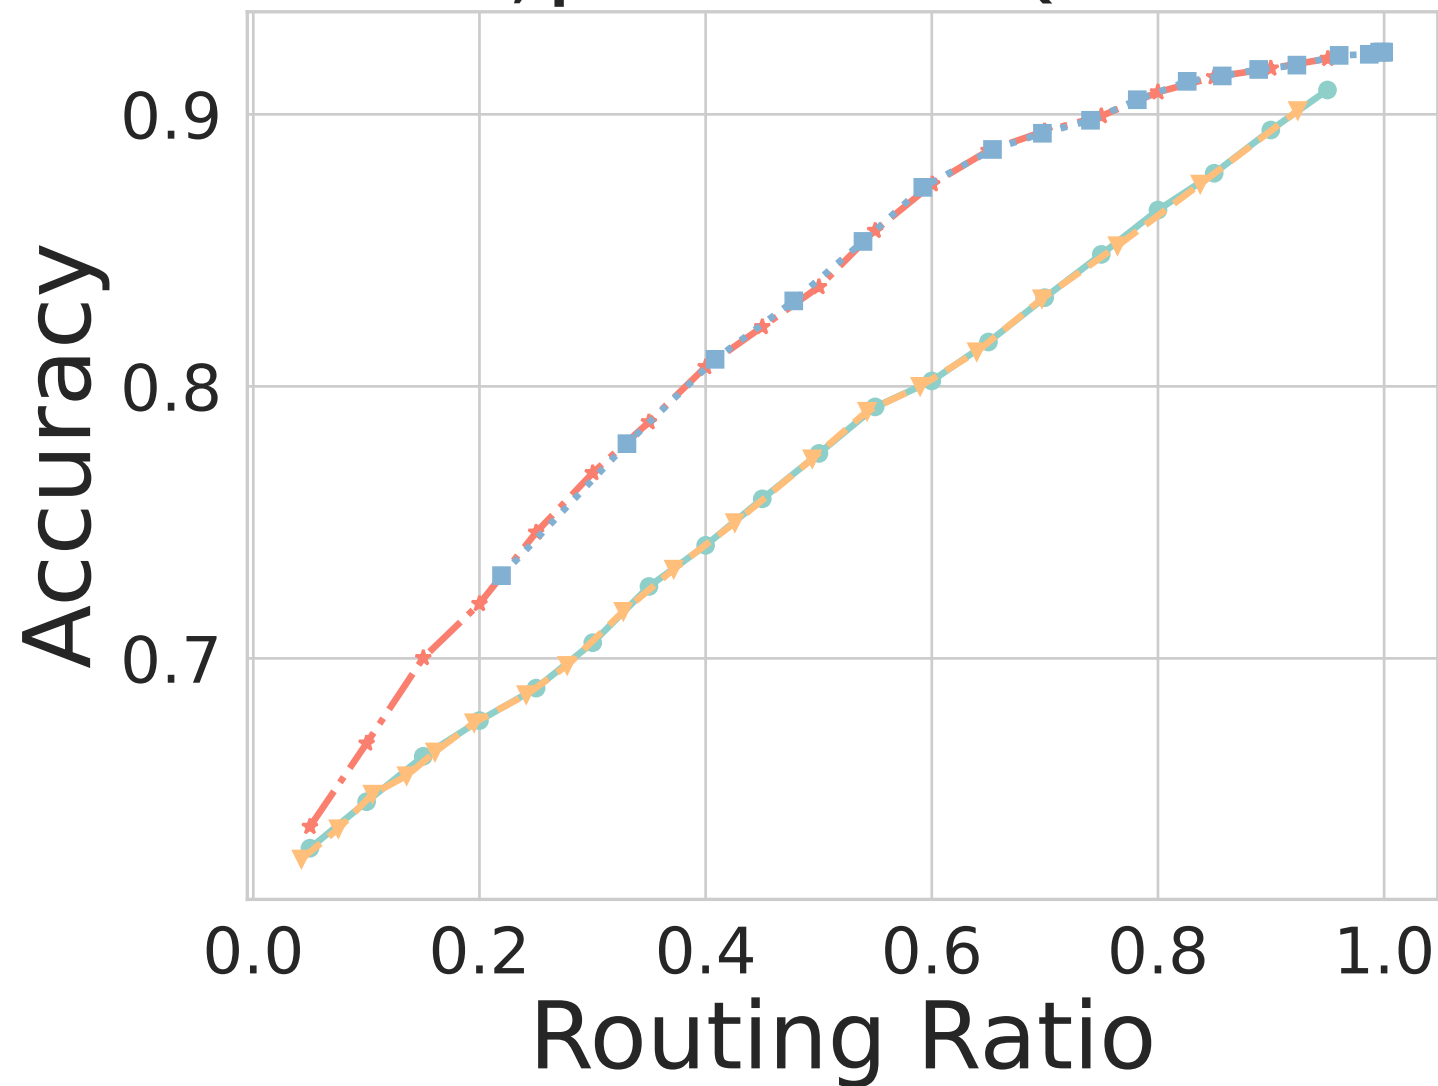

Supplement: supplementary_material [file cali_down_mmlu_phi-3.5-mini_Qwen_Qwen3-32B.pdf › Routing_SLM_LLMs/Proxy_routing_prediction/to_Qwen_Qwen3-32B/mmlu_as_downstream/cali_down_mmlu_phi-3.5-mini_Qwen_Qwen3-32B.pdf]

**MMLU, phi-4-mini-reasoning to Qwen3-32B**

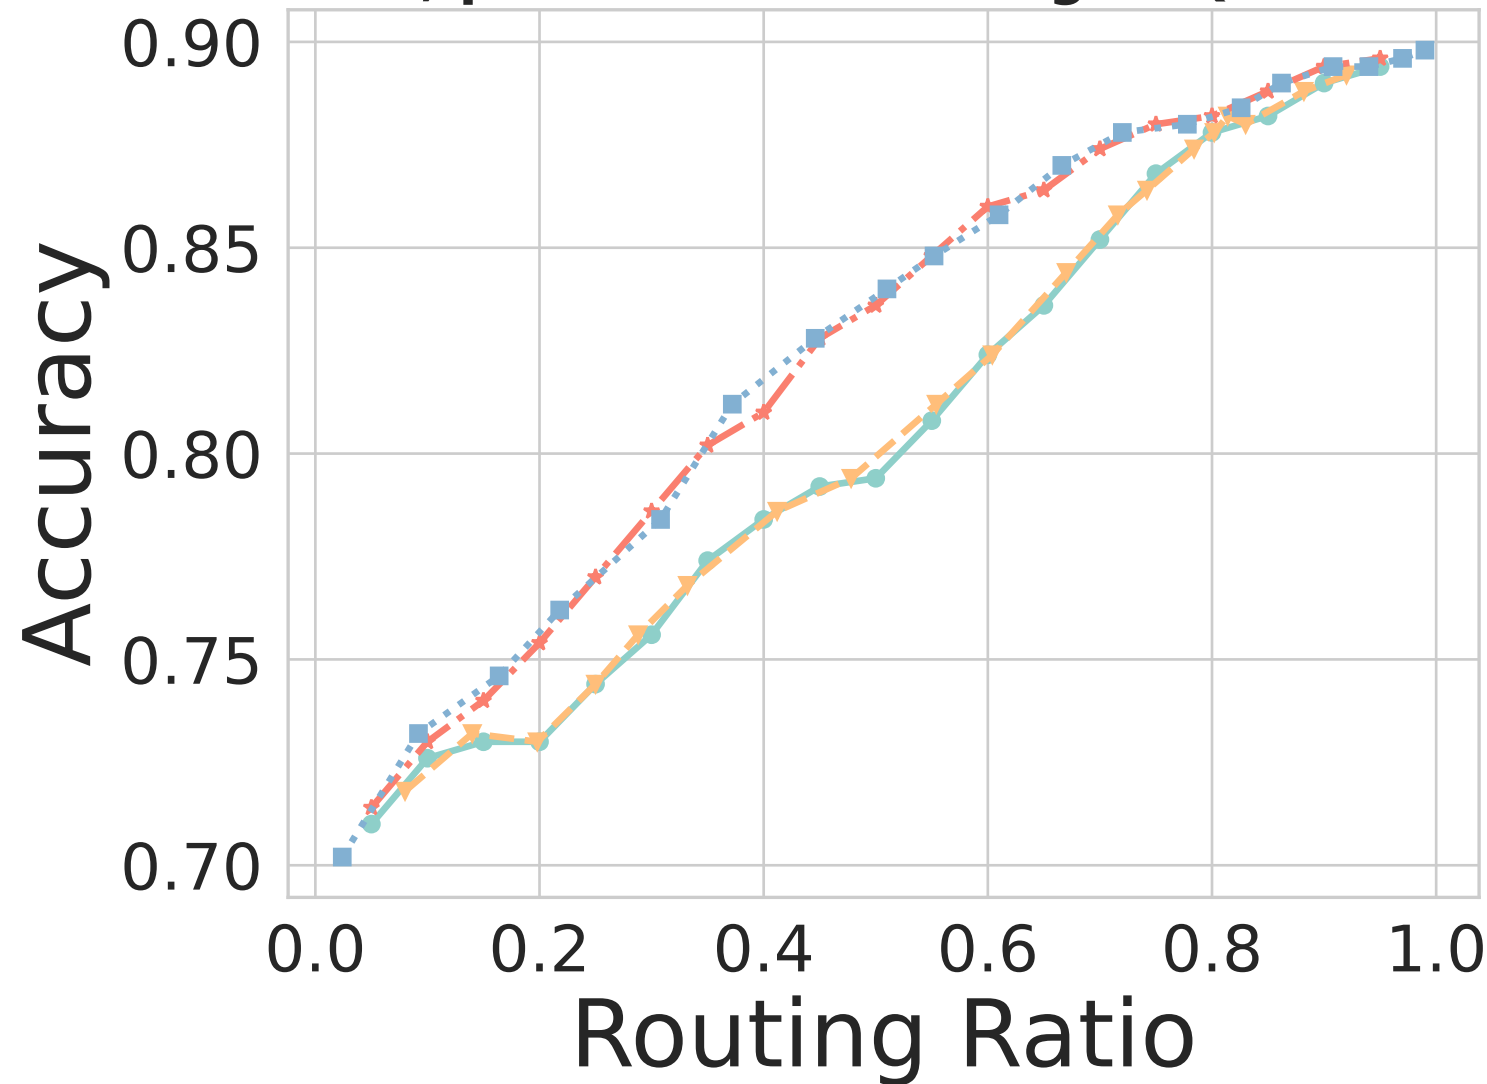

Supplement: supplementary_material [file cali_down_mmlu_phi-4-mini-reasoning_Qwen_Qwen3-32B.pdf › Routing_SLM_LLMs/Proxy_routing_prediction/to_Qwen_Qwen3-32B/mmlu_as_downstream/cali_down_mmlu_phi-4-mini-reasoning_Qwen_Qwen3-32B.pdf]

**MMLU, qwen-2.5-7b to Qwen3-32B**

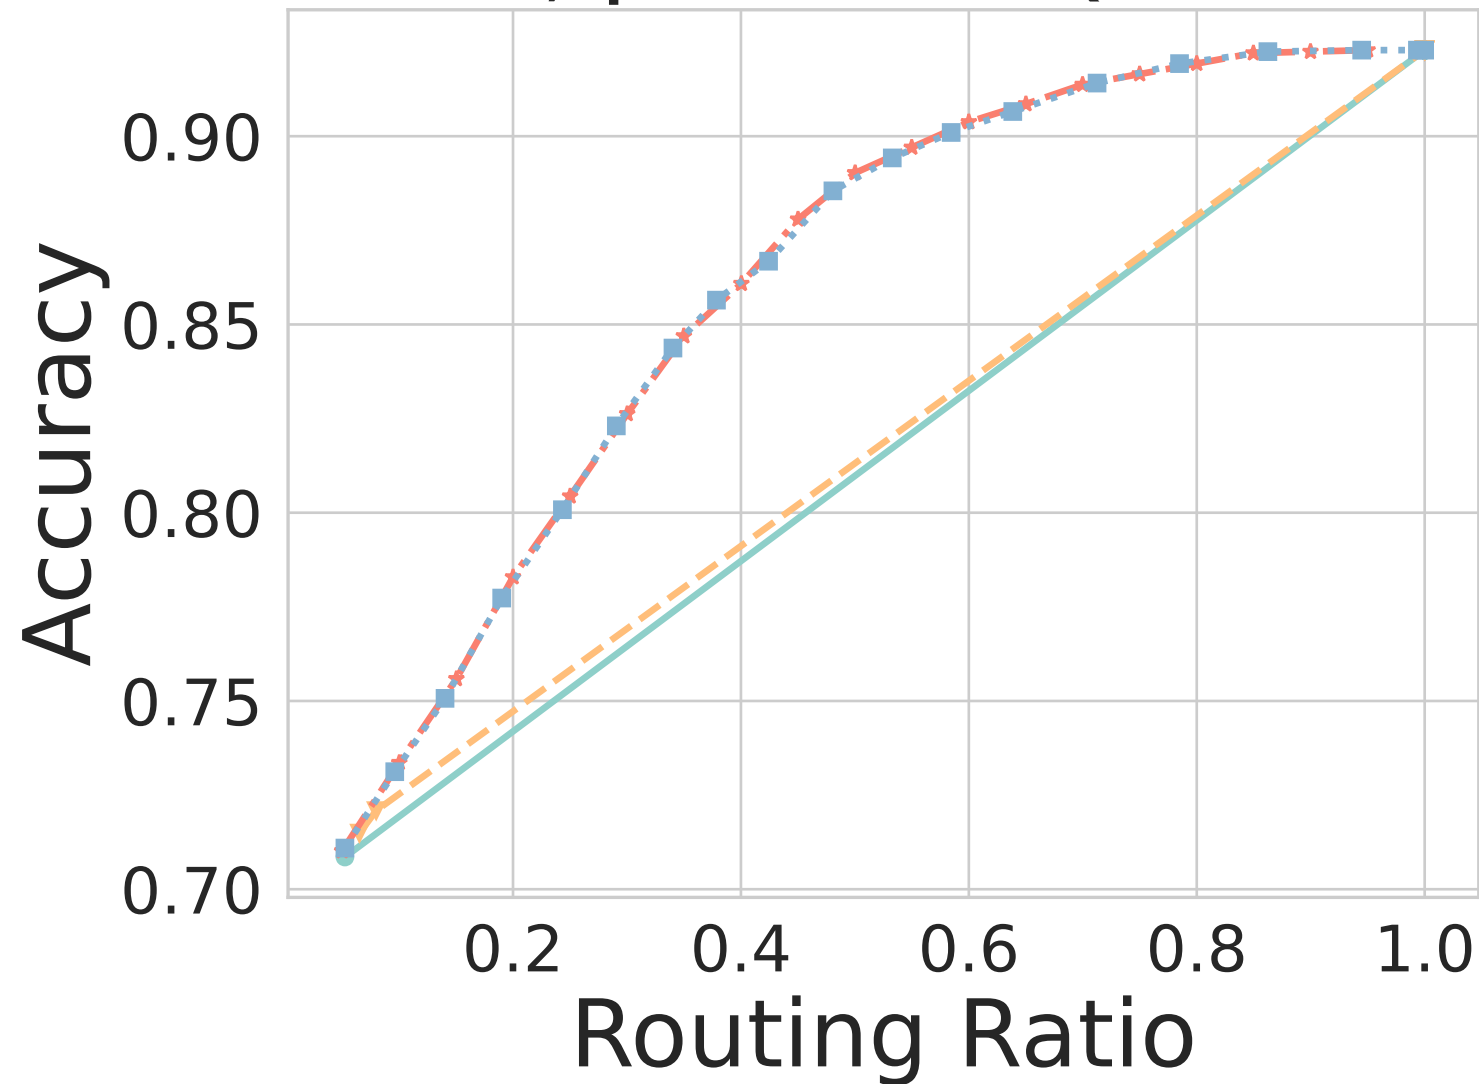

Supplement: supplementary_material [file cali_down_mmlu_qwen-2.5-7b_Qwen_Qwen3-32B.pdf › Routing_SLM_LLMs/Proxy_routing_prediction/to_Qwen_Qwen3-32B/mmlu_as_downstream/cali_down_mmlu_qwen-2.5-7b_Qwen_Qwen3-32B.pdf]

**MMLU, rwkv to Qwen3-32B**

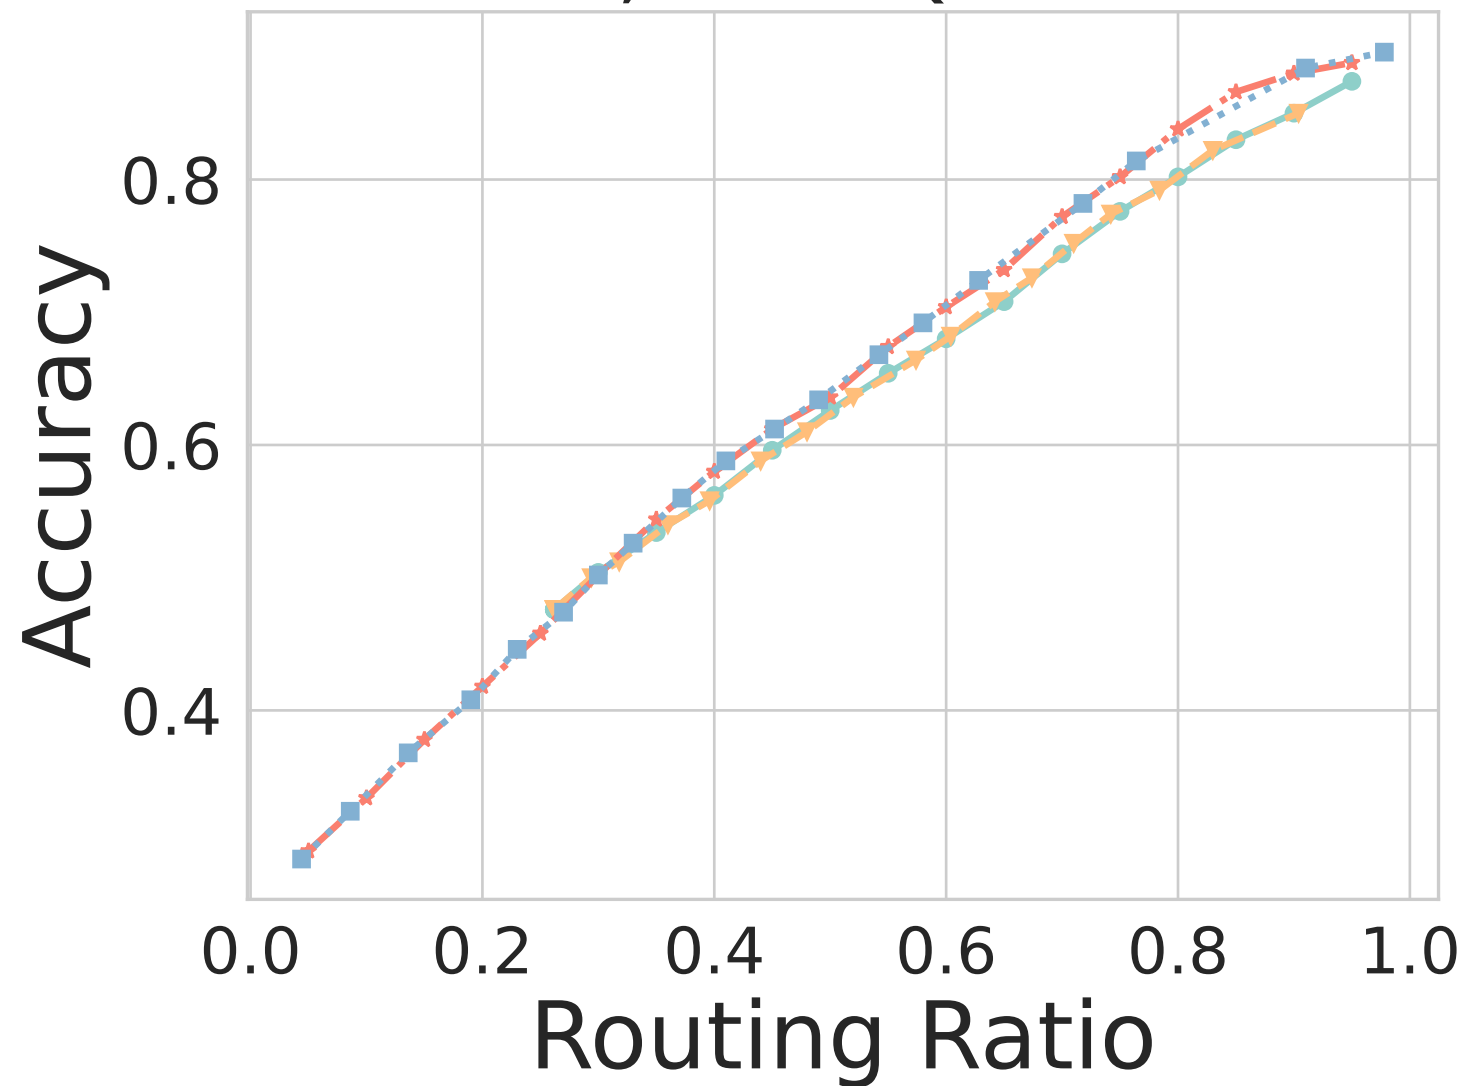

Supplement: supplementary_material [file cali_down_mmlu_rwkv_Qwen_Qwen3-32B.pdf › Routing_SLM_LLMs/Proxy_routing_prediction/to_Qwen_Qwen3-32B/mmlu_as_downstream/cali_down_mmlu_rwkv_Qwen_Qwen3-32B.pdf]

**MultiArith, Qwen3-0.6B to Qwen3-32B**

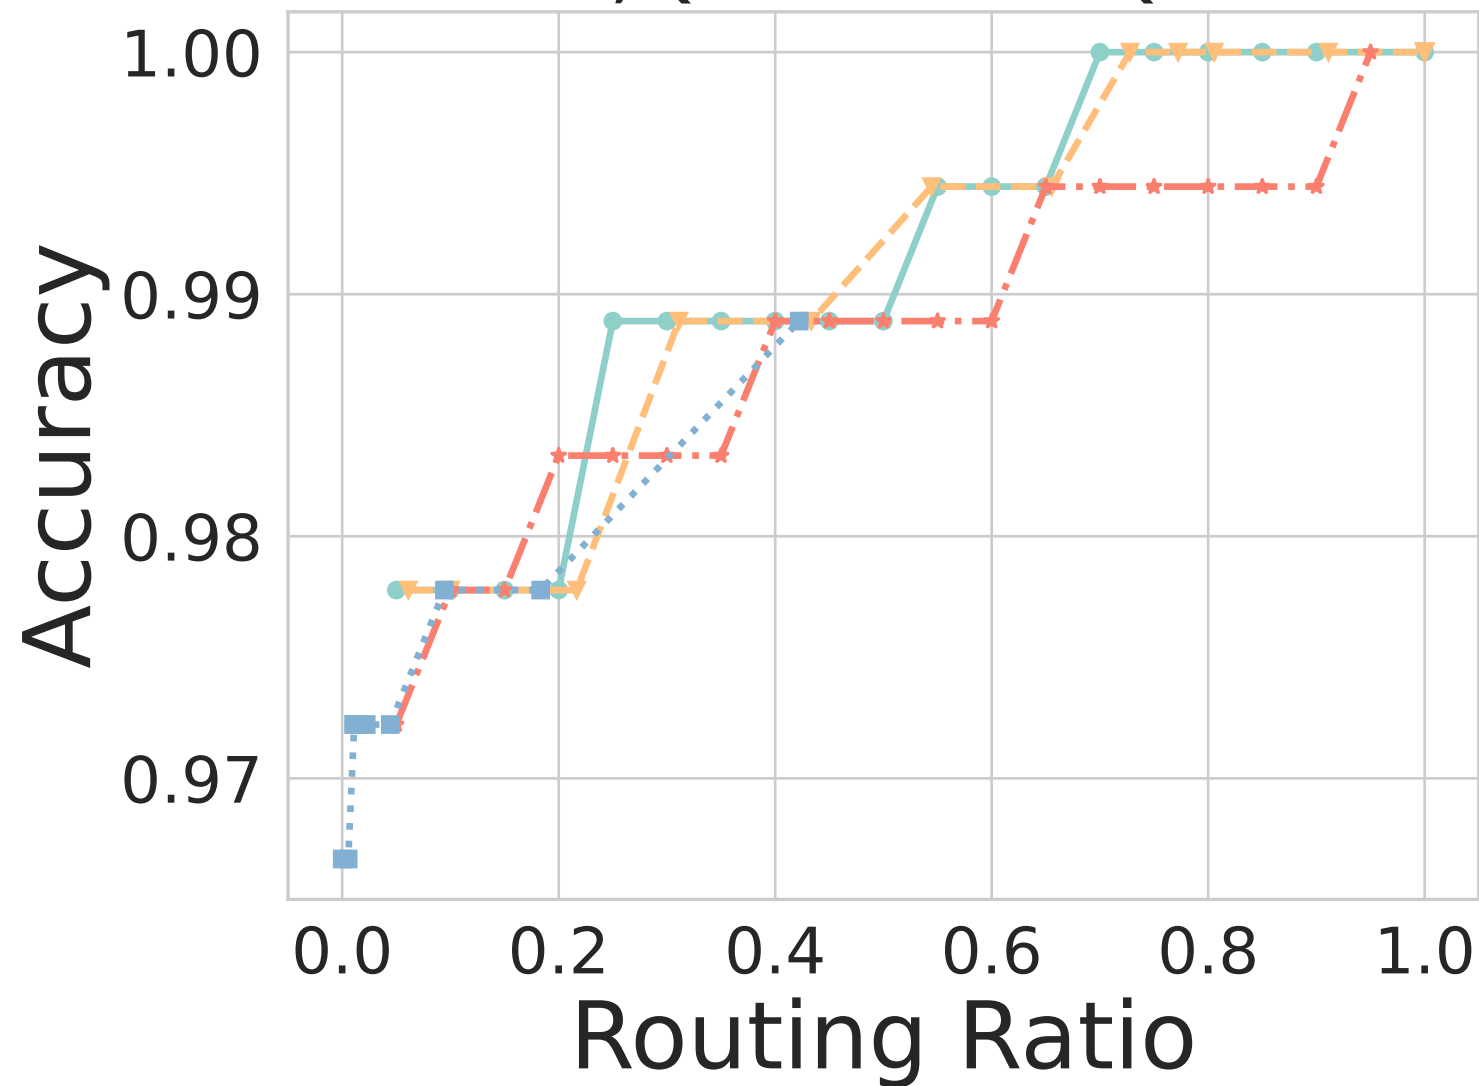

Supplement: supplementary_material [file cali_down_multiarith_Qwen3-0.6B_Qwen_Qwen3-32B.pdf › Routing_SLM_LLMs/Proxy_routing_prediction/to_Qwen_Qwen3-32B/multiarith_as_downstream/cali_down_multiarith_Qwen3-0.6B_Qwen_Qwen3-32B.pdf]

MultiArith, Qwen3-1.7B to Qwen3-32B

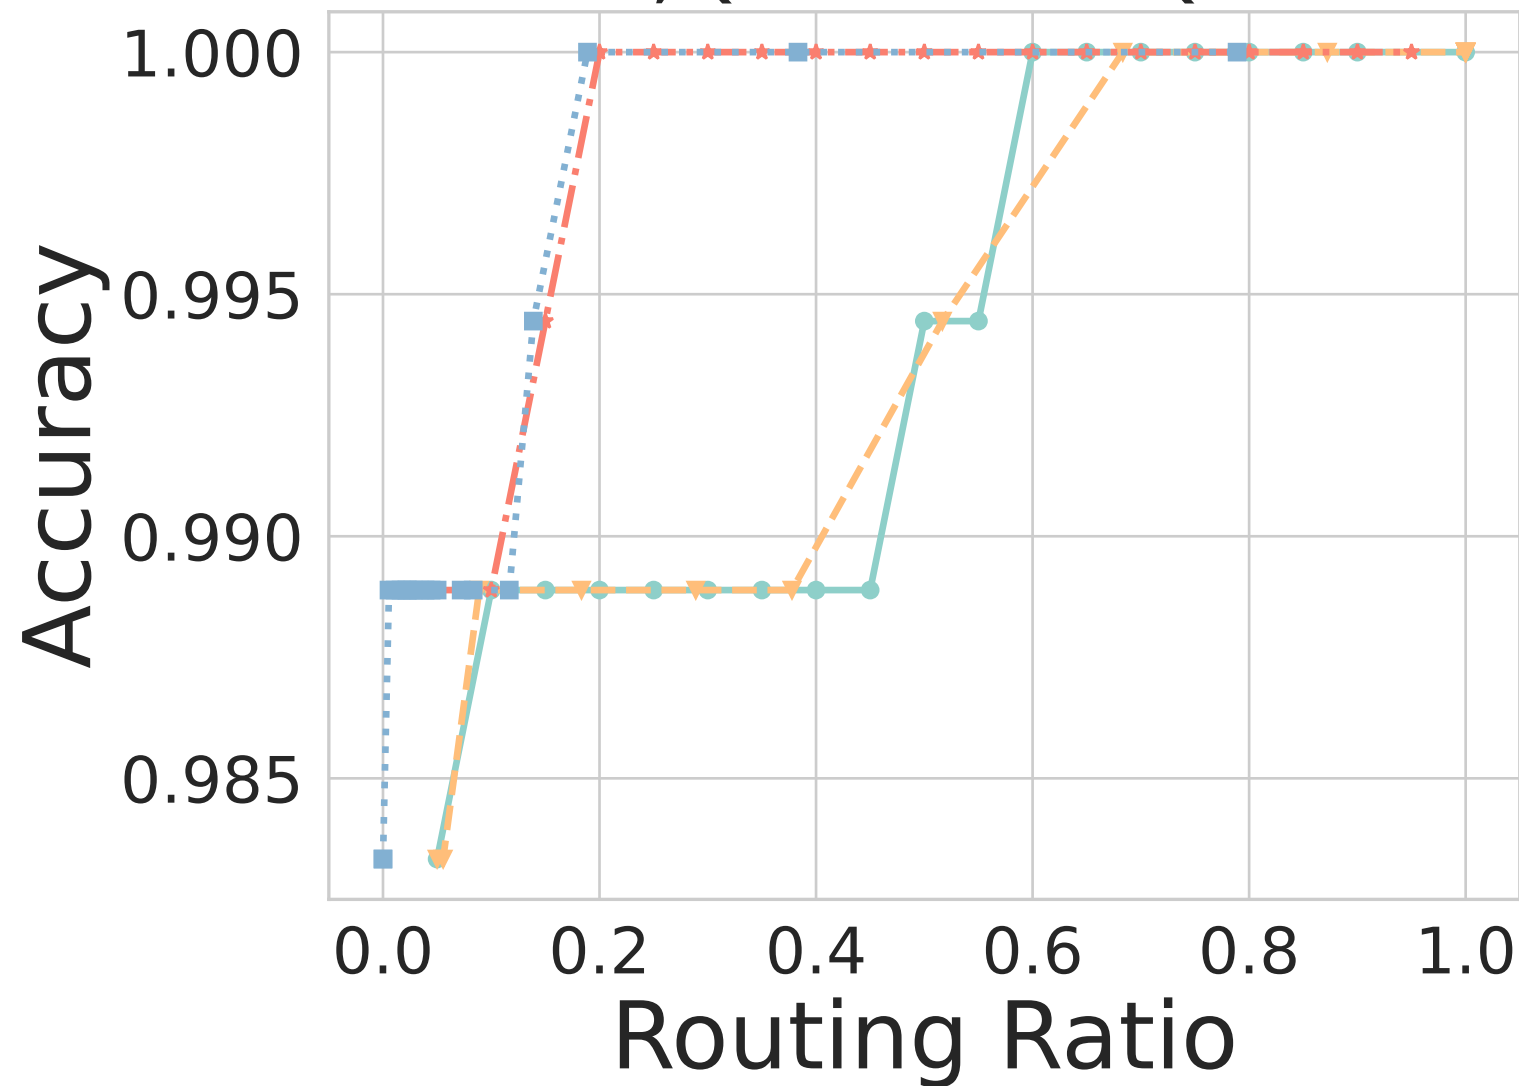

Supplement: supplementary_material [file cali_down_multiarith_Qwen3-1.7B_Qwen_Qwen3-32B.pdf › Routing_SLM_LLMs/Proxy_routing_prediction/to_Qwen_Qwen3-32B/multiarith_as_downstream/cali_down_multiarith_Qwen3-1.7B_Qwen_Qwen3-32B.pdf]

**MultiArith, Qwen3-4B to Qwen3-32B**

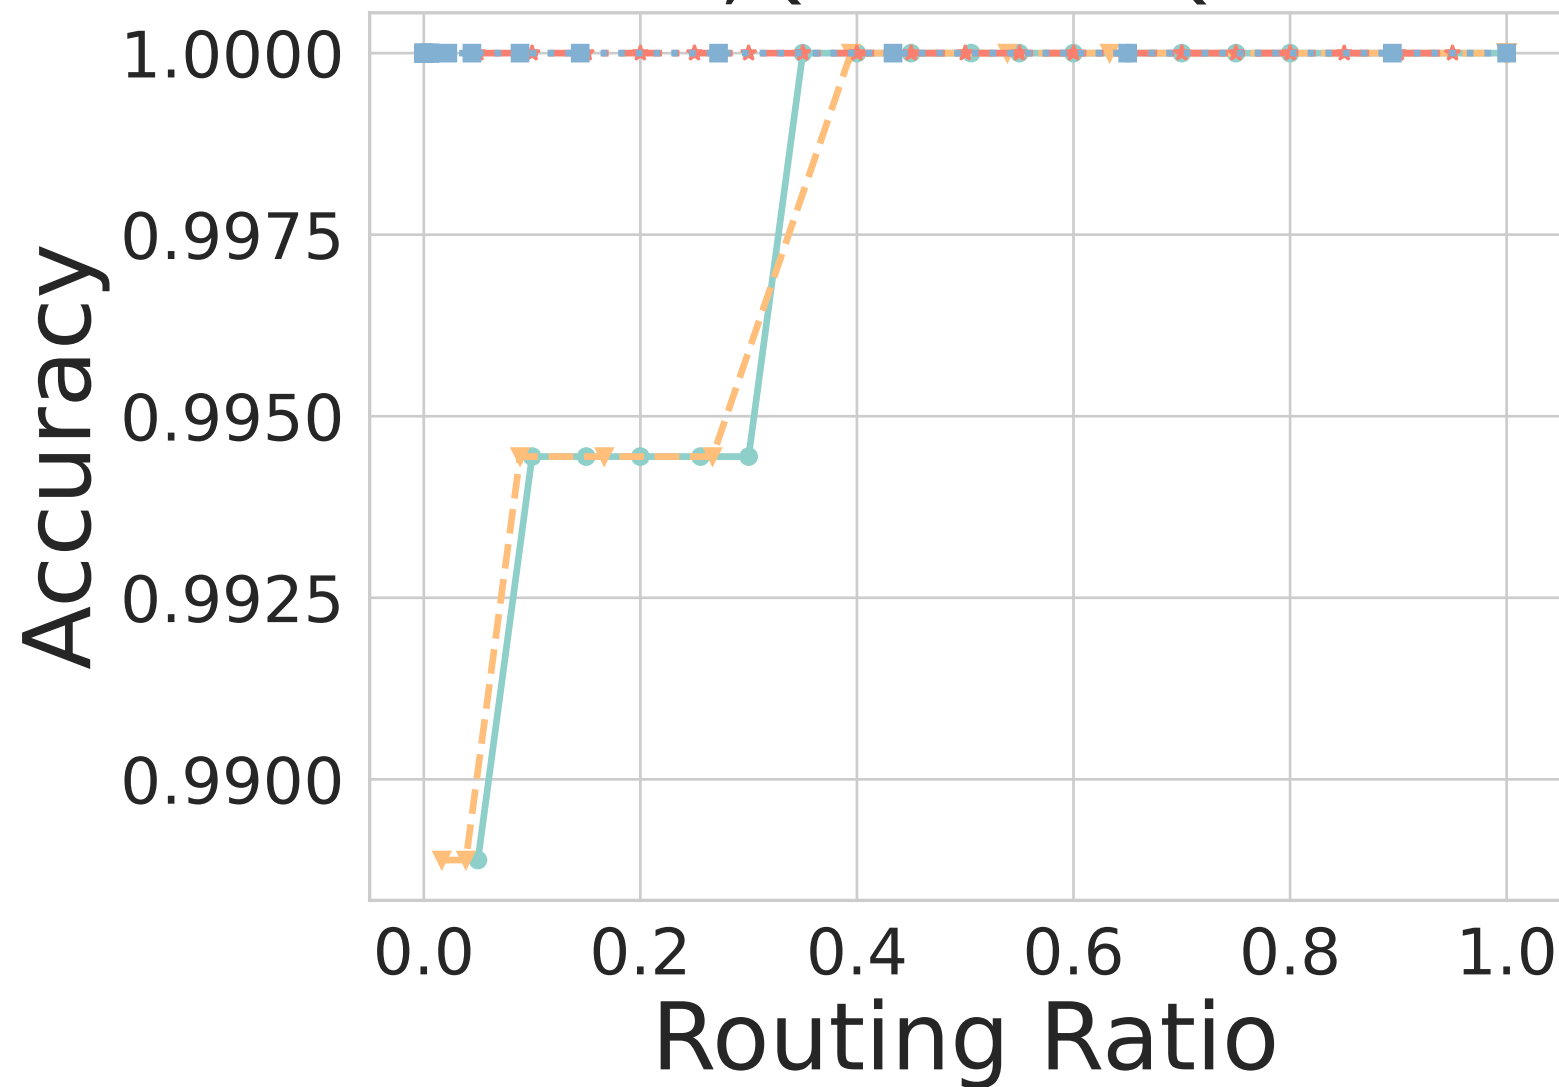

Supplement: supplementary_material [file cali_down_multiarith_Qwen3-4B_Qwen_Qwen3-32B.pdf › Routing_SLM_LLMs/Proxy_routing_prediction/to_Qwen_Qwen3-32B/multiarith_as_downstream/cali_down_multiarith_Qwen3-4B_Qwen_Qwen3-32B.pdf]

**MultiArith, granite-3.1-8b to Qwen3-32B**

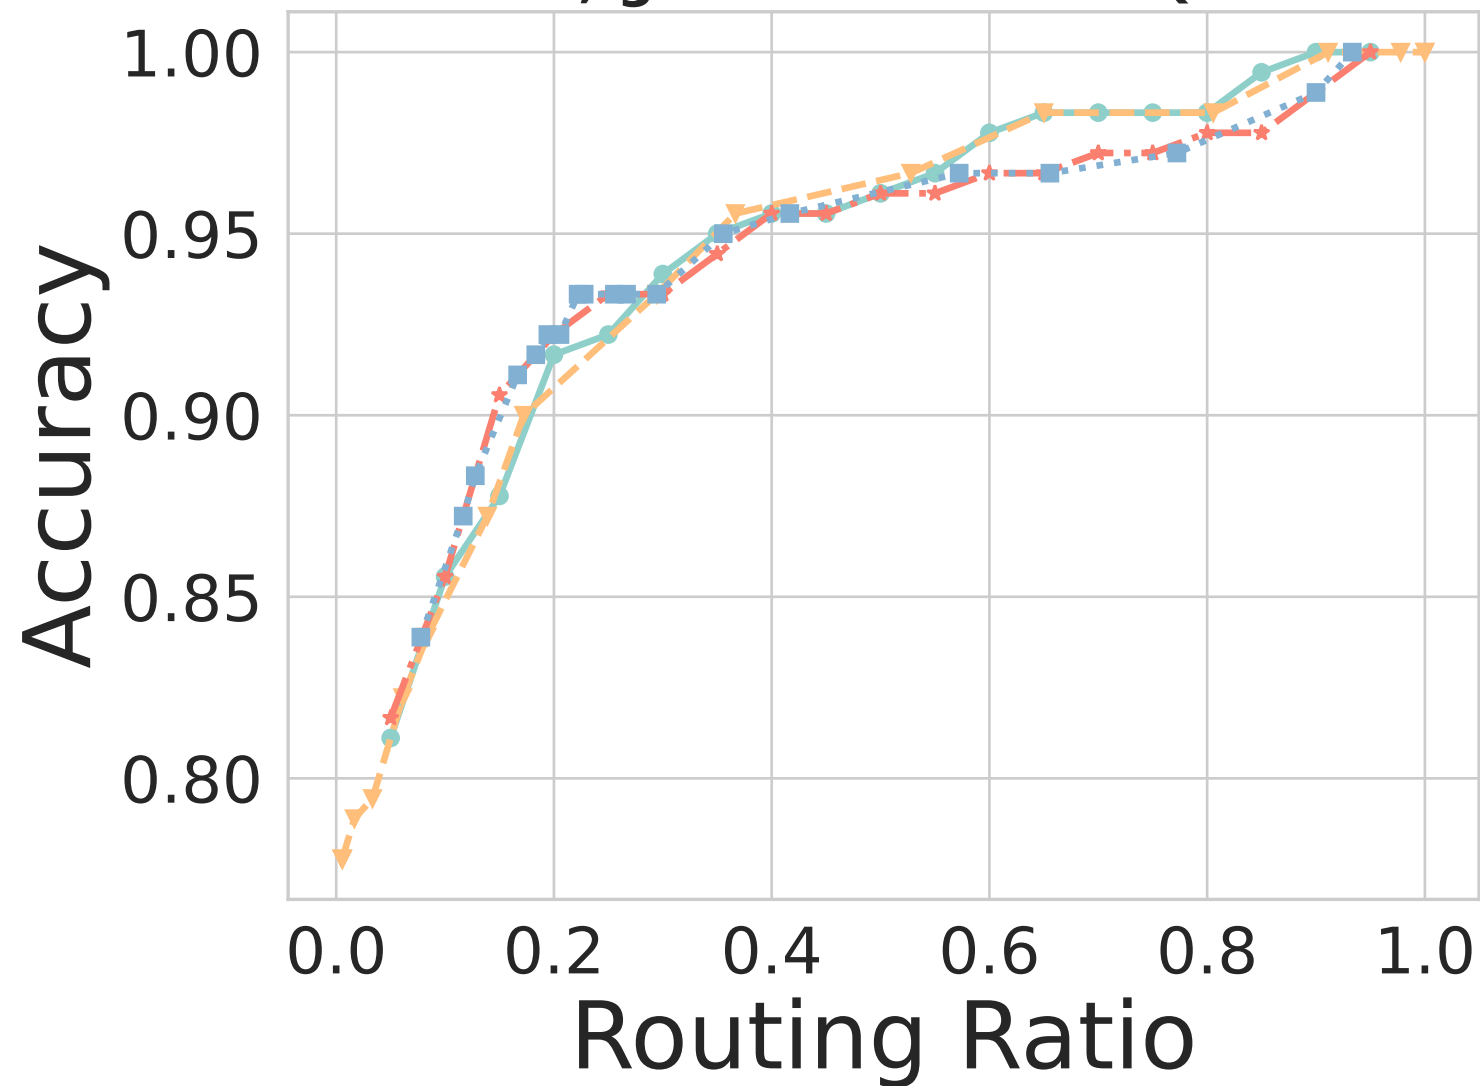

Supplement: supplementary_material [file cali_down_multiarith_granite-3.1-8b_Qwen_Qwen3-32B.pdf › Routing_SLM_LLMs/Proxy_routing_prediction/to_Qwen_Qwen3-32B/multiarith_as_downstream/cali_down_multiarith_granite-3.1-8b_Qwen_Qwen3-32B.pdf]
