# Supplementary material (part 3 of 14)
Source: ML conference proceedings conference paper supplement (https://openreview.net/forum?id=smdbra3VEi)

**BoolQ, phi-3.5-mini to DeepSeek-R1**

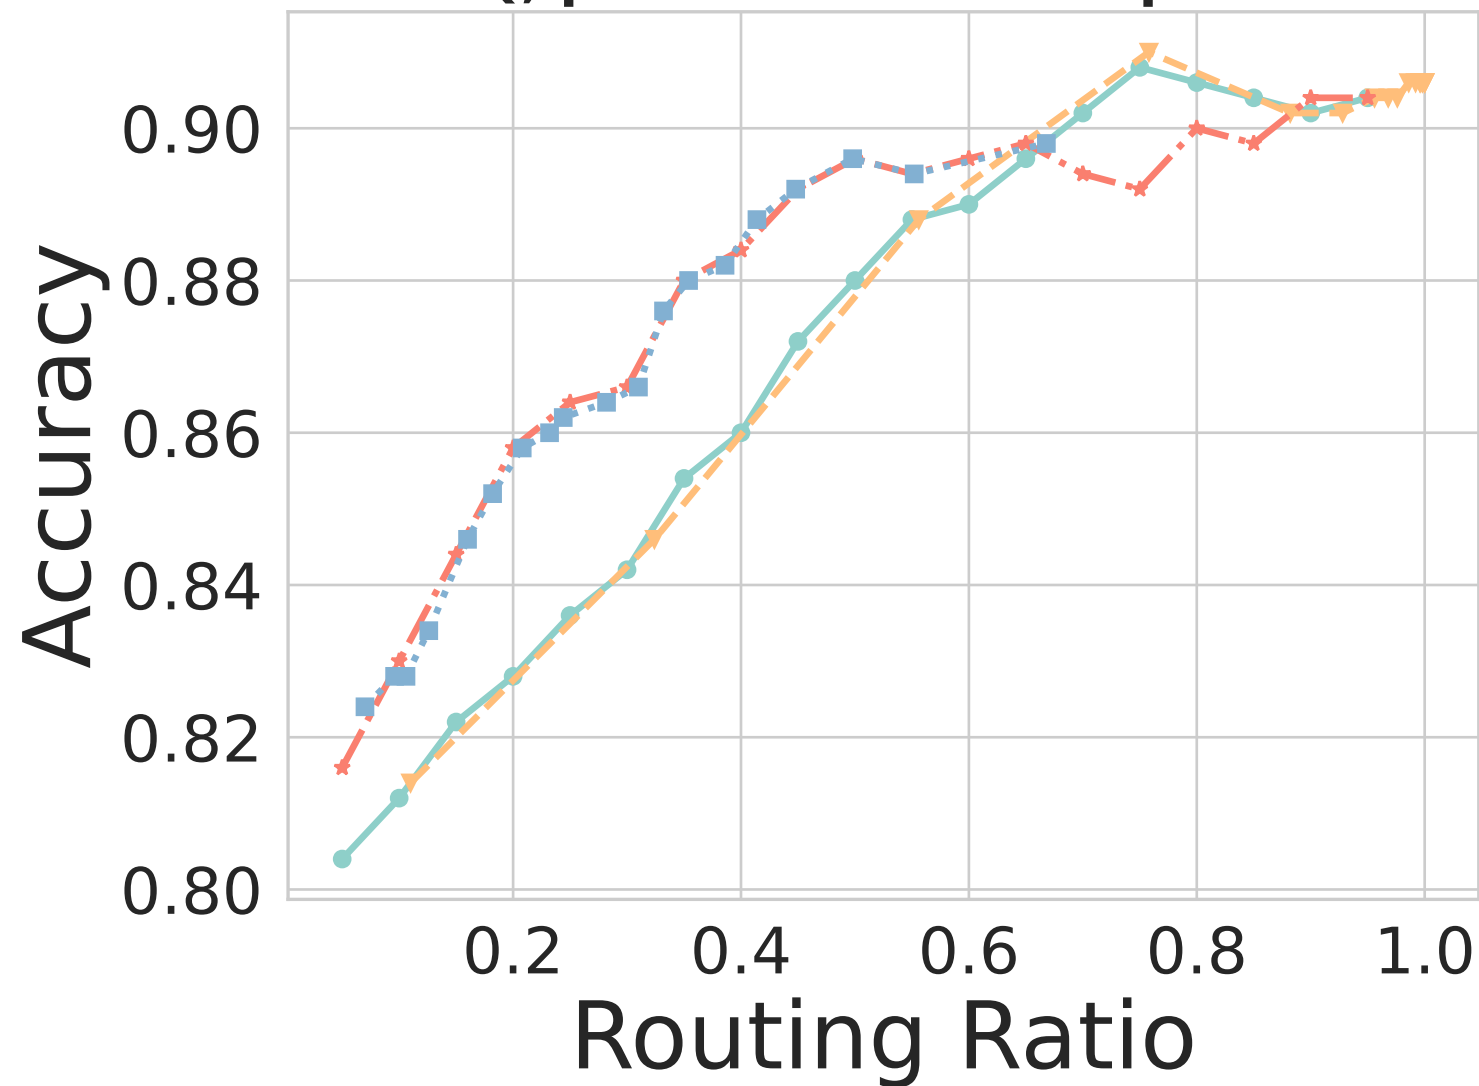

Supplement: supplementary_material [file cali_down_boolq_phi-3.5-mini_deepseek-reasoner.pdf › Routing_SLM_LLMs/Proxy_routing_prediction/to_deepseek-reasoner/boolq_as_downstream/cali_down_boolq_phi-3.5-mini_deepseek-reasoner.pdf]

# BoolQ, phi-4-mini-reasoning to DeepSeek-R1

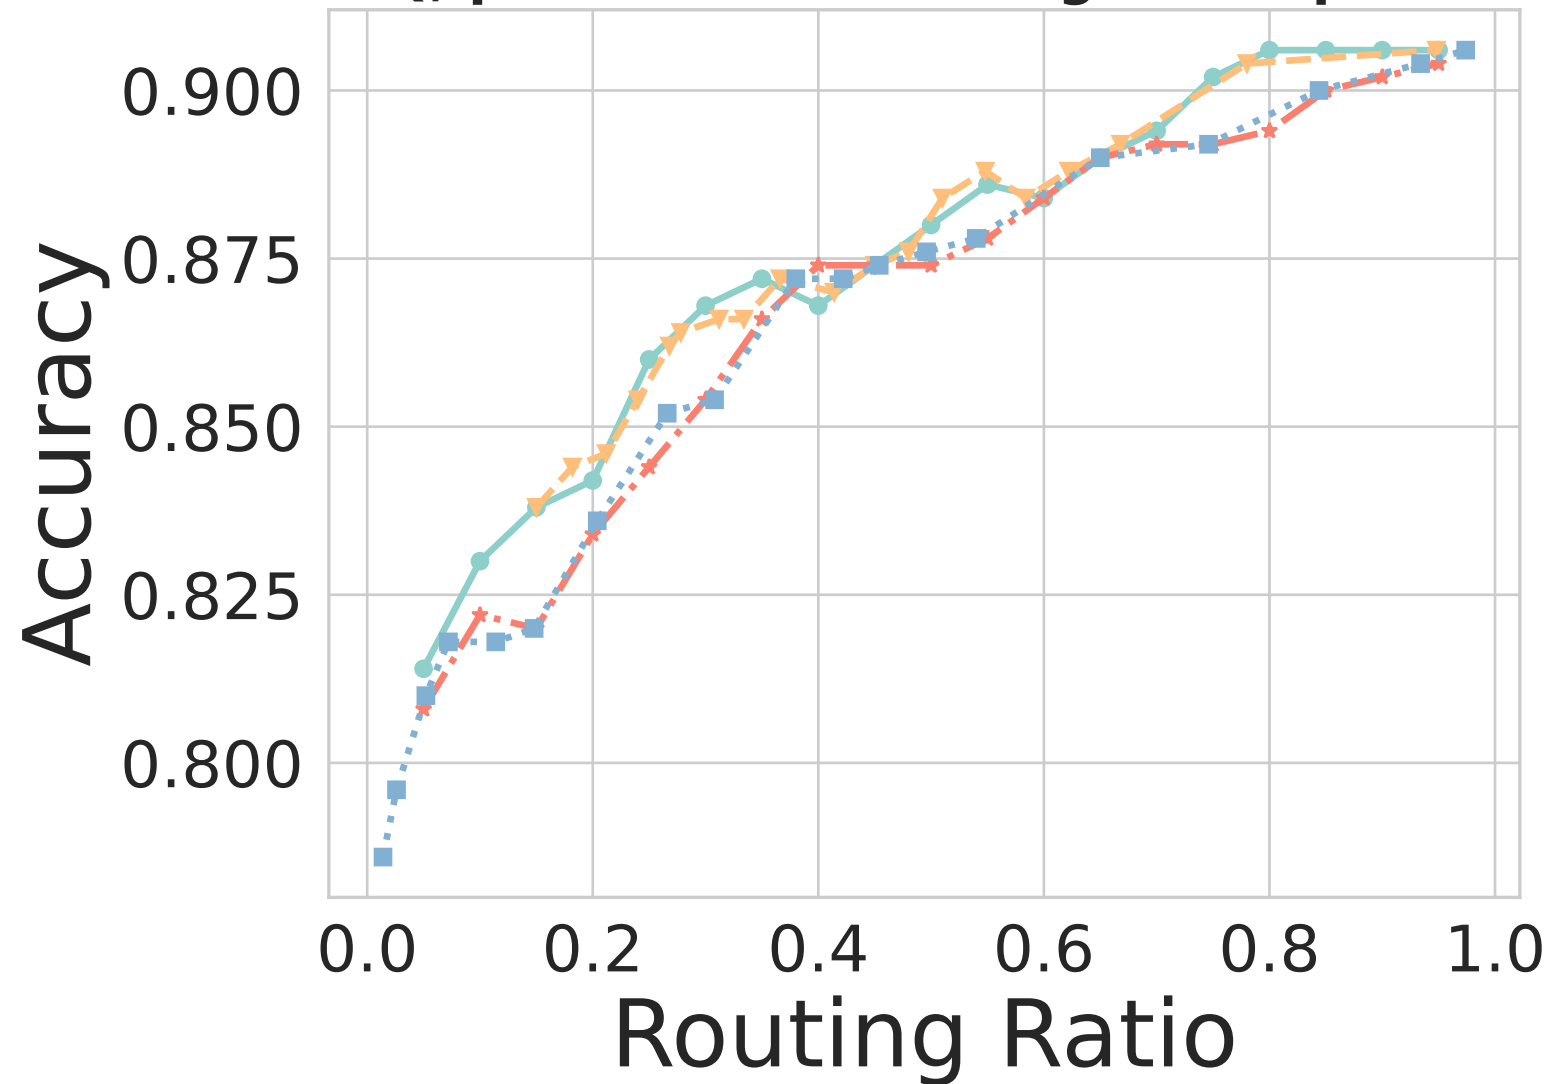

Supplement: supplementary_material [file cali_down_boolq_phi-4-mini-reasoning_deepseek-reasoner.pdf › Routing_SLM_LLMs/Proxy_routing_prediction/to_deepseek-reasoner/boolq_as_downstream/cali_down_boolq_phi-4-mini-reasoning_deepseek-reasoner.pdf]

**BoolQ, qwen-2.5-7b to DeepSeek-R1**

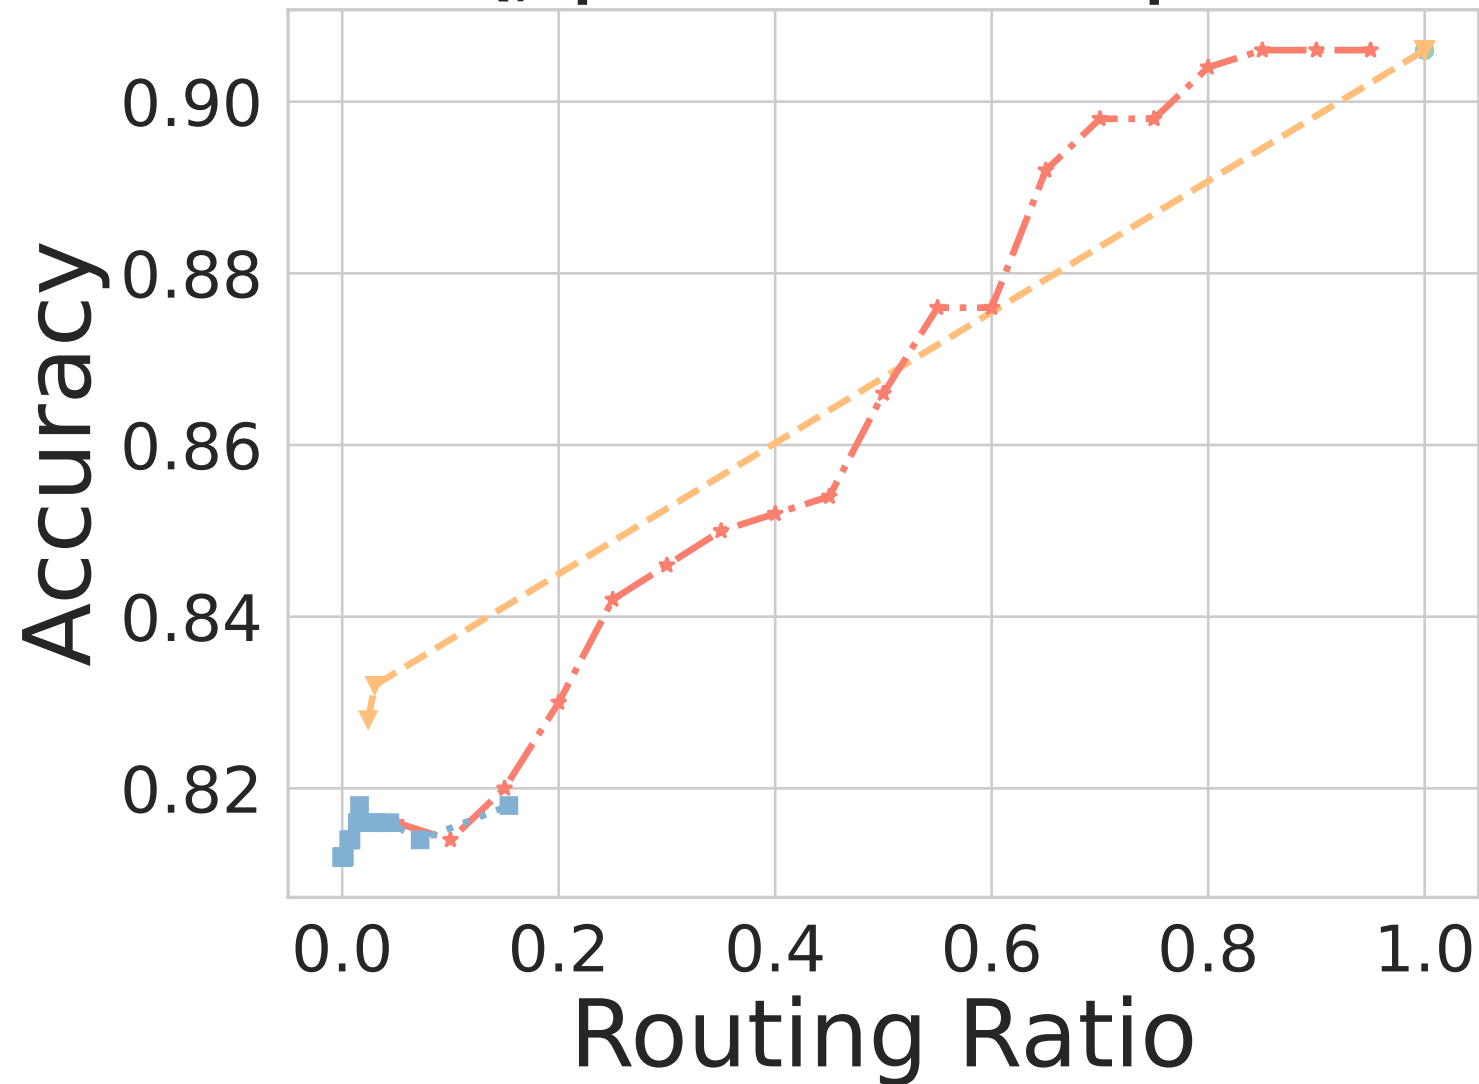

Supplement: supplementary_material [file cali_down_boolq_qwen-2.5-7b_deepseek-reasoner.pdf › Routing_SLM_LLMs/Proxy_routing_prediction/to_deepseek-reasoner/boolq_as_downstream/cali_down_boolq_qwen-2.5-7b_deepseek-reasoner.pdf]

**BoolQ, rwkv to DeepSeek-R1**

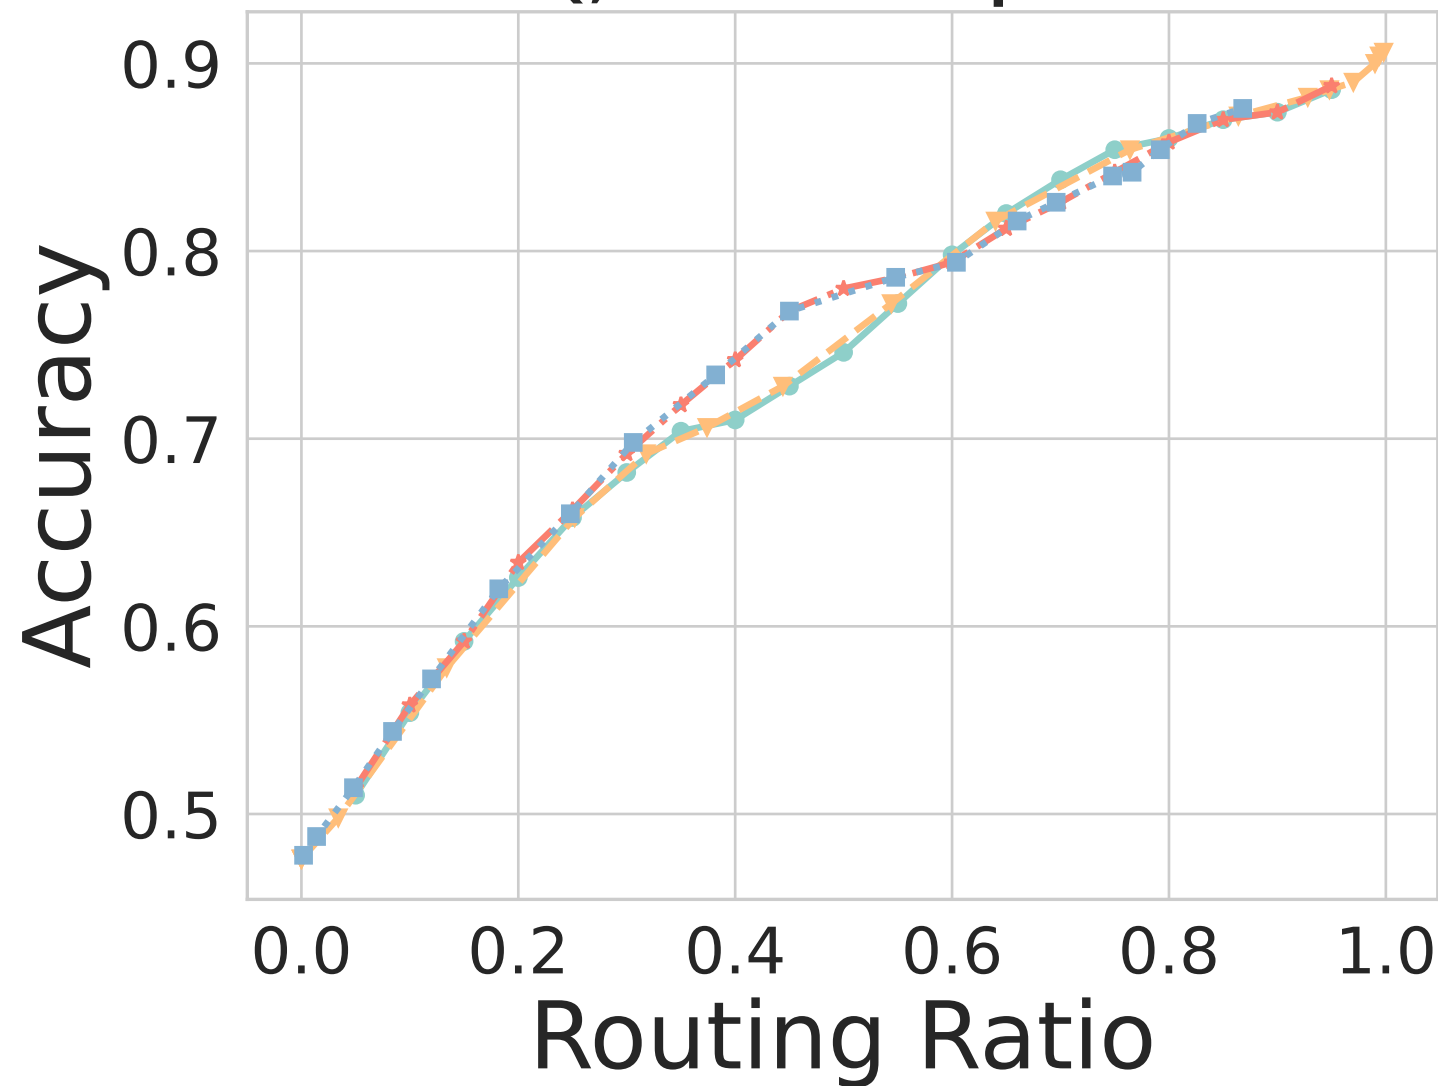

Supplement: supplementary_material [file cali_down_boolq_rwkv_deepseek-reasoner.pdf › Routing_SLM_LLMs/Proxy_routing_prediction/to_deepseek-reasoner/boolq_as_downstream/cali_down_boolq_rwkv_deepseek-reasoner.pdf]

**CoQA, Qwen3-0.6B to DeepSeek-R1**

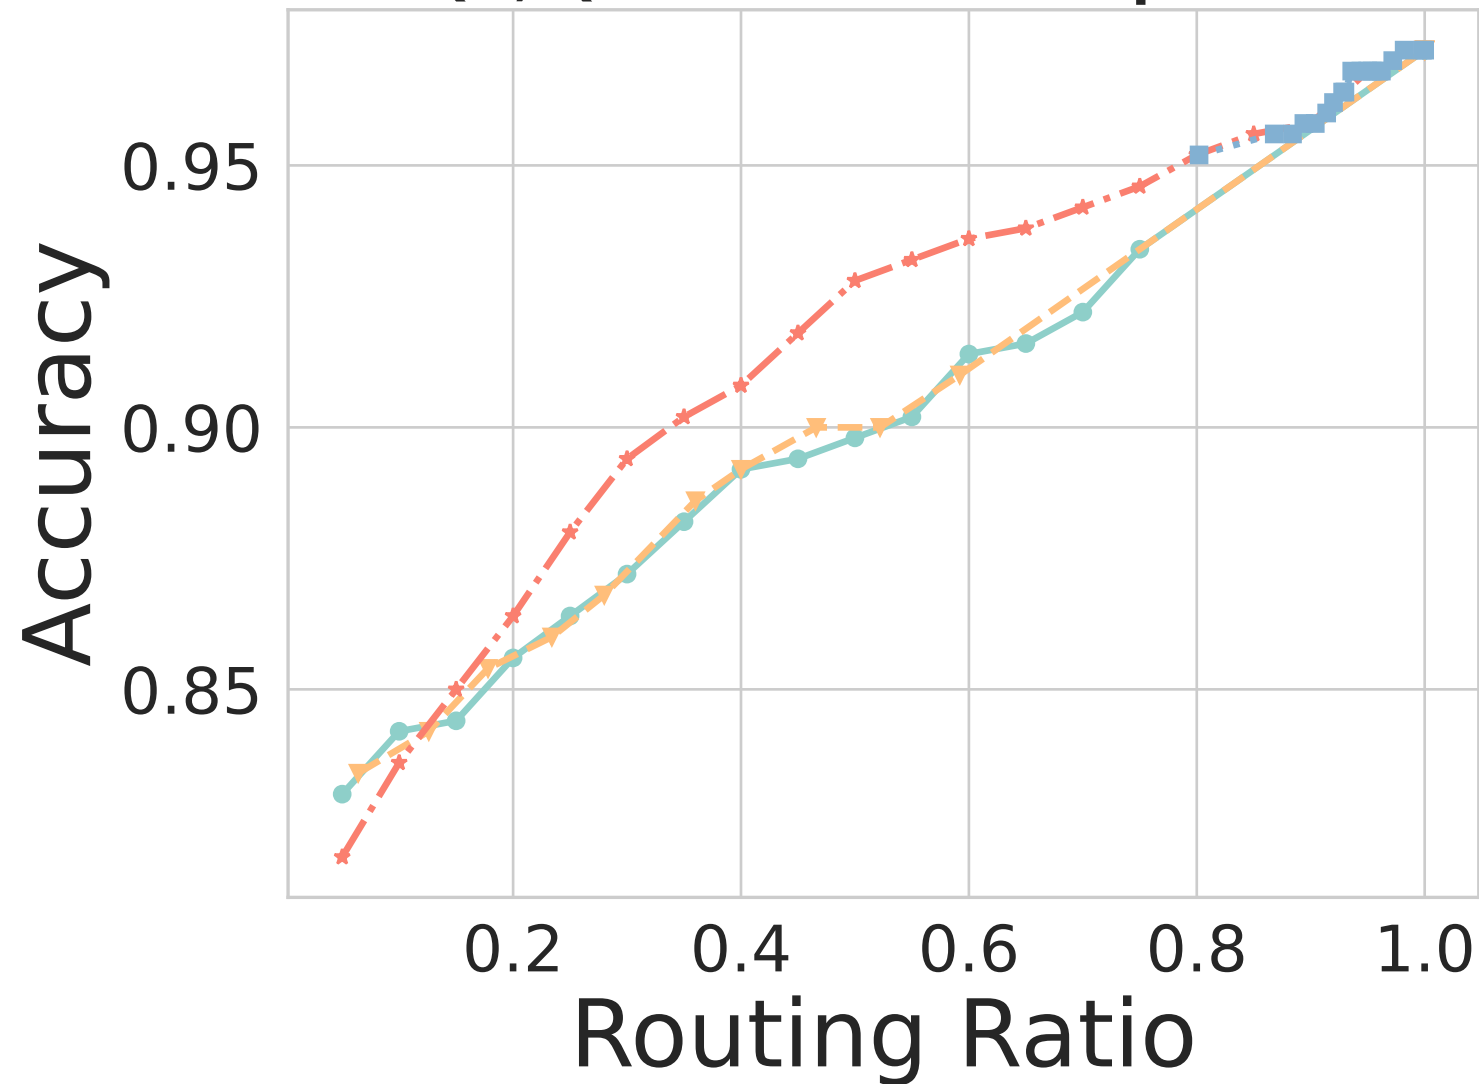

Supplement: supplementary_material [file cali_down_co_qa_Qwen3-0.6B_deepseek-reasoner.pdf › Routing_SLM_LLMs/Proxy_routing_prediction/to_deepseek-reasoner/co_qa_as_downstream/cali_down_co_qa_Qwen3-0.6B_deepseek-reasoner.pdf]

CoQA, Qwen3-1.7B to DeepSeek-R1

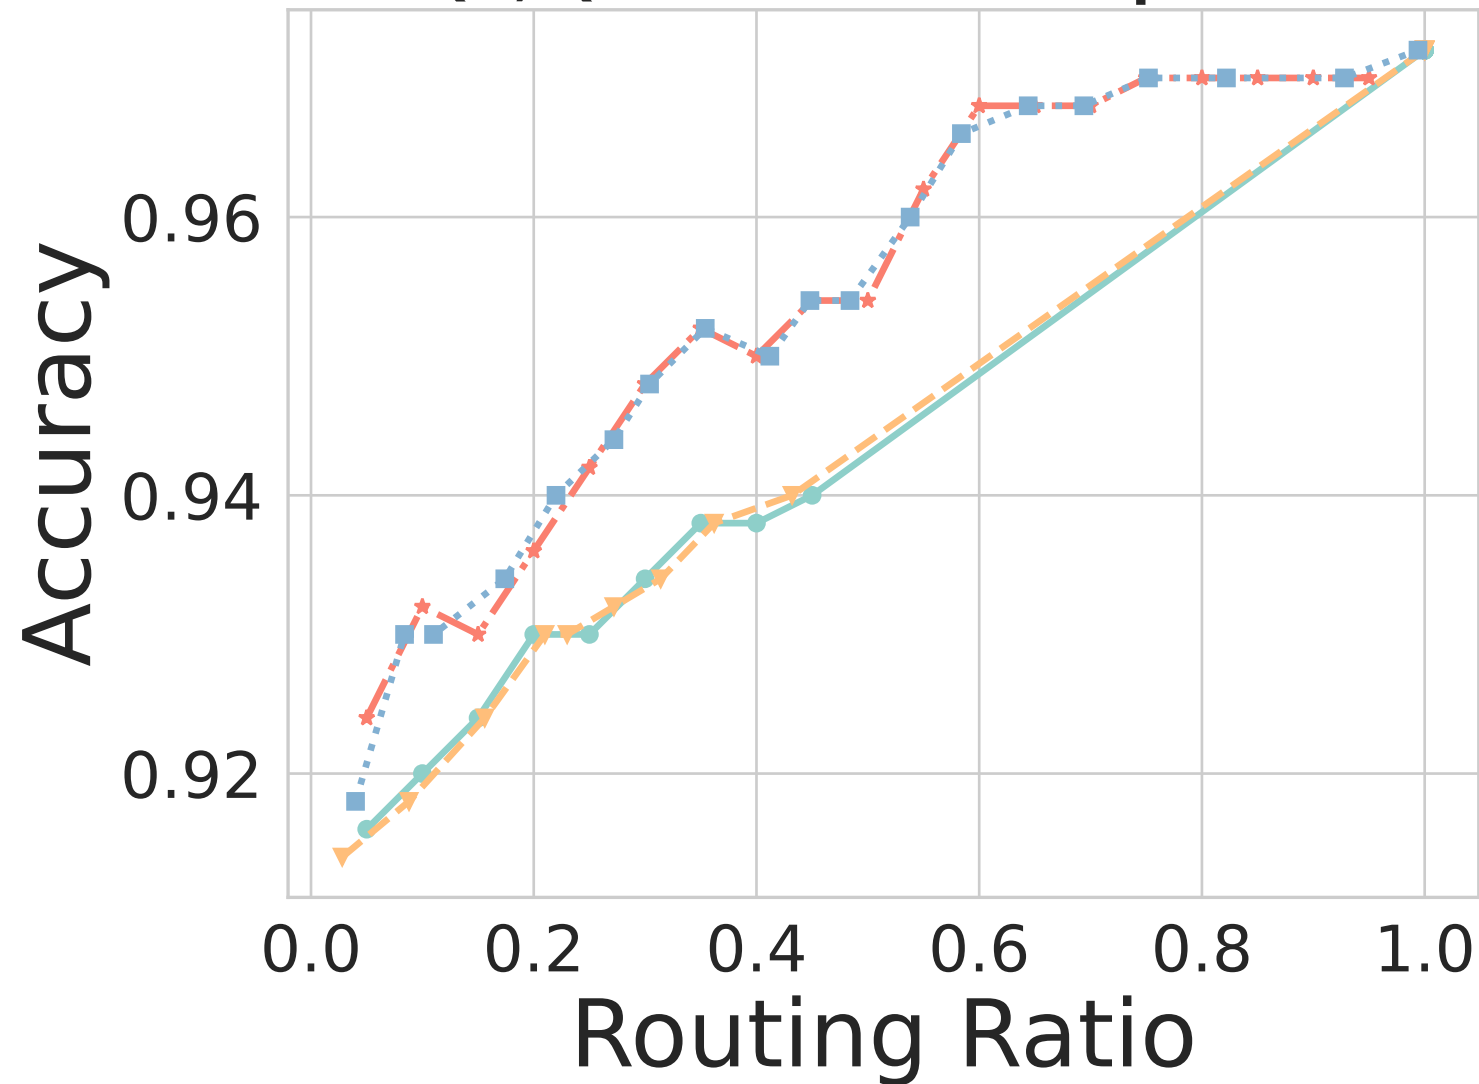

Supplement: supplementary_material [file cali_down_co_qa_Qwen3-1.7B_deepseek-reasoner.pdf › Routing_SLM_LLMs/Proxy_routing_prediction/to_deepseek-reasoner/co_qa_as_downstream/cali_down_co_qa_Qwen3-1.7B_deepseek-reasoner.pdf]

CoQA, Qwen3-4B to DeepSeek-R1

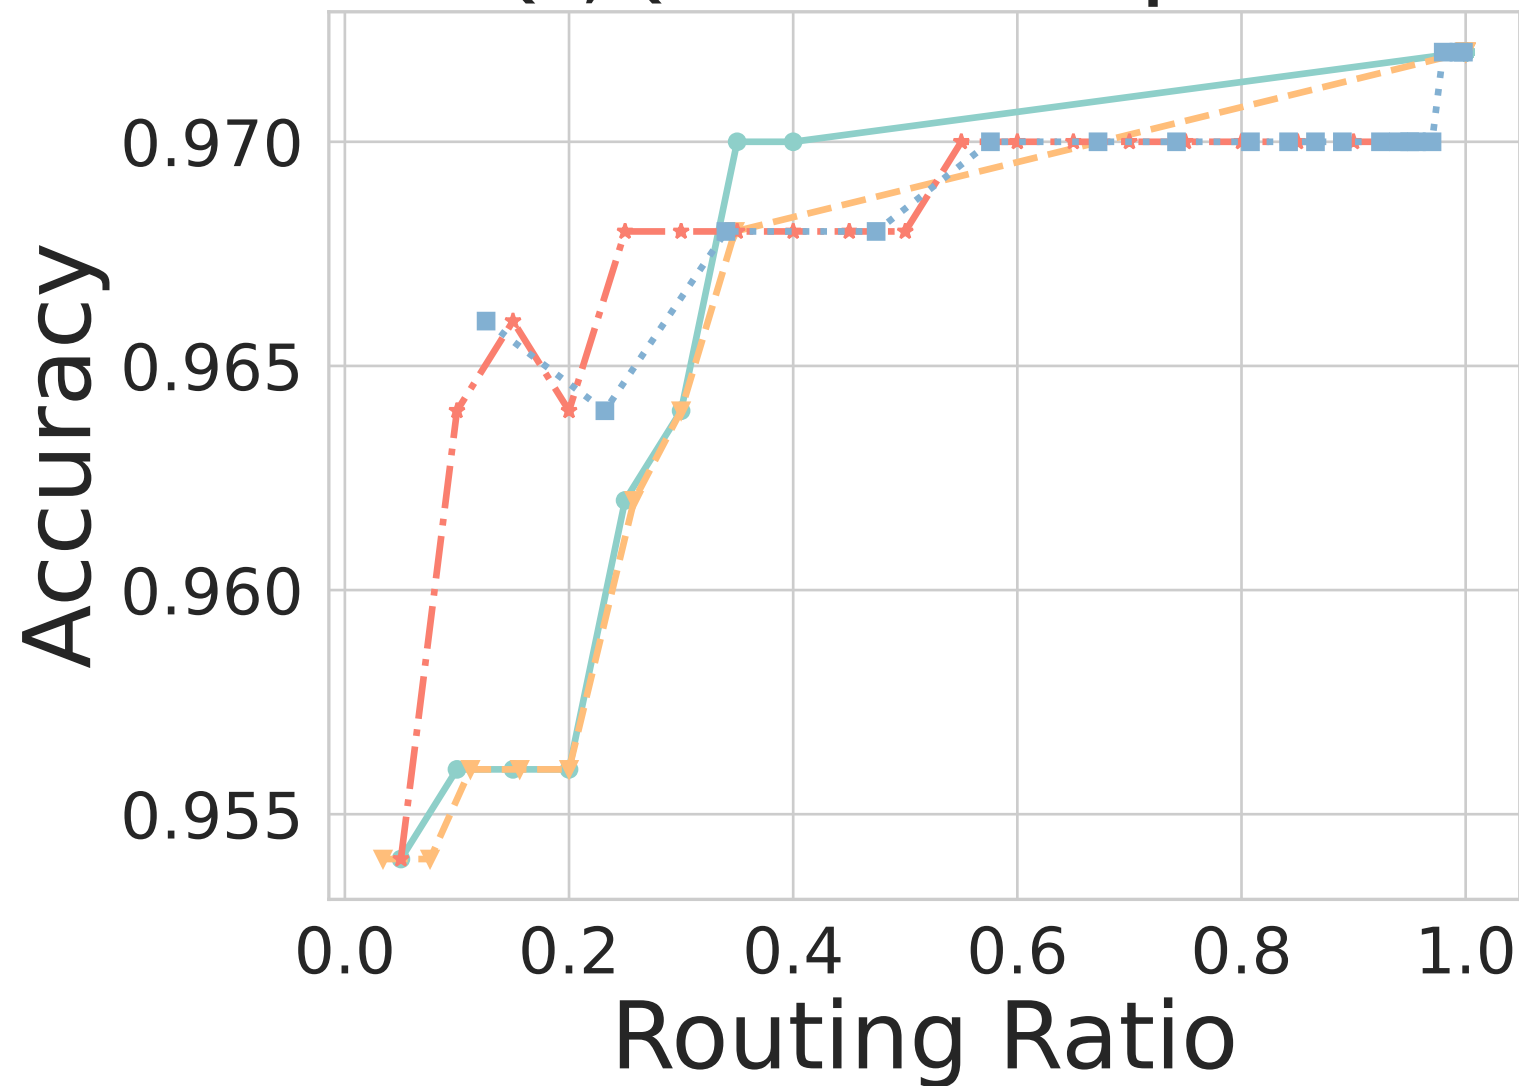

Supplement: supplementary_material [file cali_down_co_qa_Qwen3-4B_deepseek-reasoner.pdf › Routing_SLM_LLMs/Proxy_routing_prediction/to_deepseek-reasoner/co_qa_as_downstream/cali_down_co_qa_Qwen3-4B_deepseek-reasoner.pdf]

**CoQA, granite-3.1-8b to DeepSeek-R1**

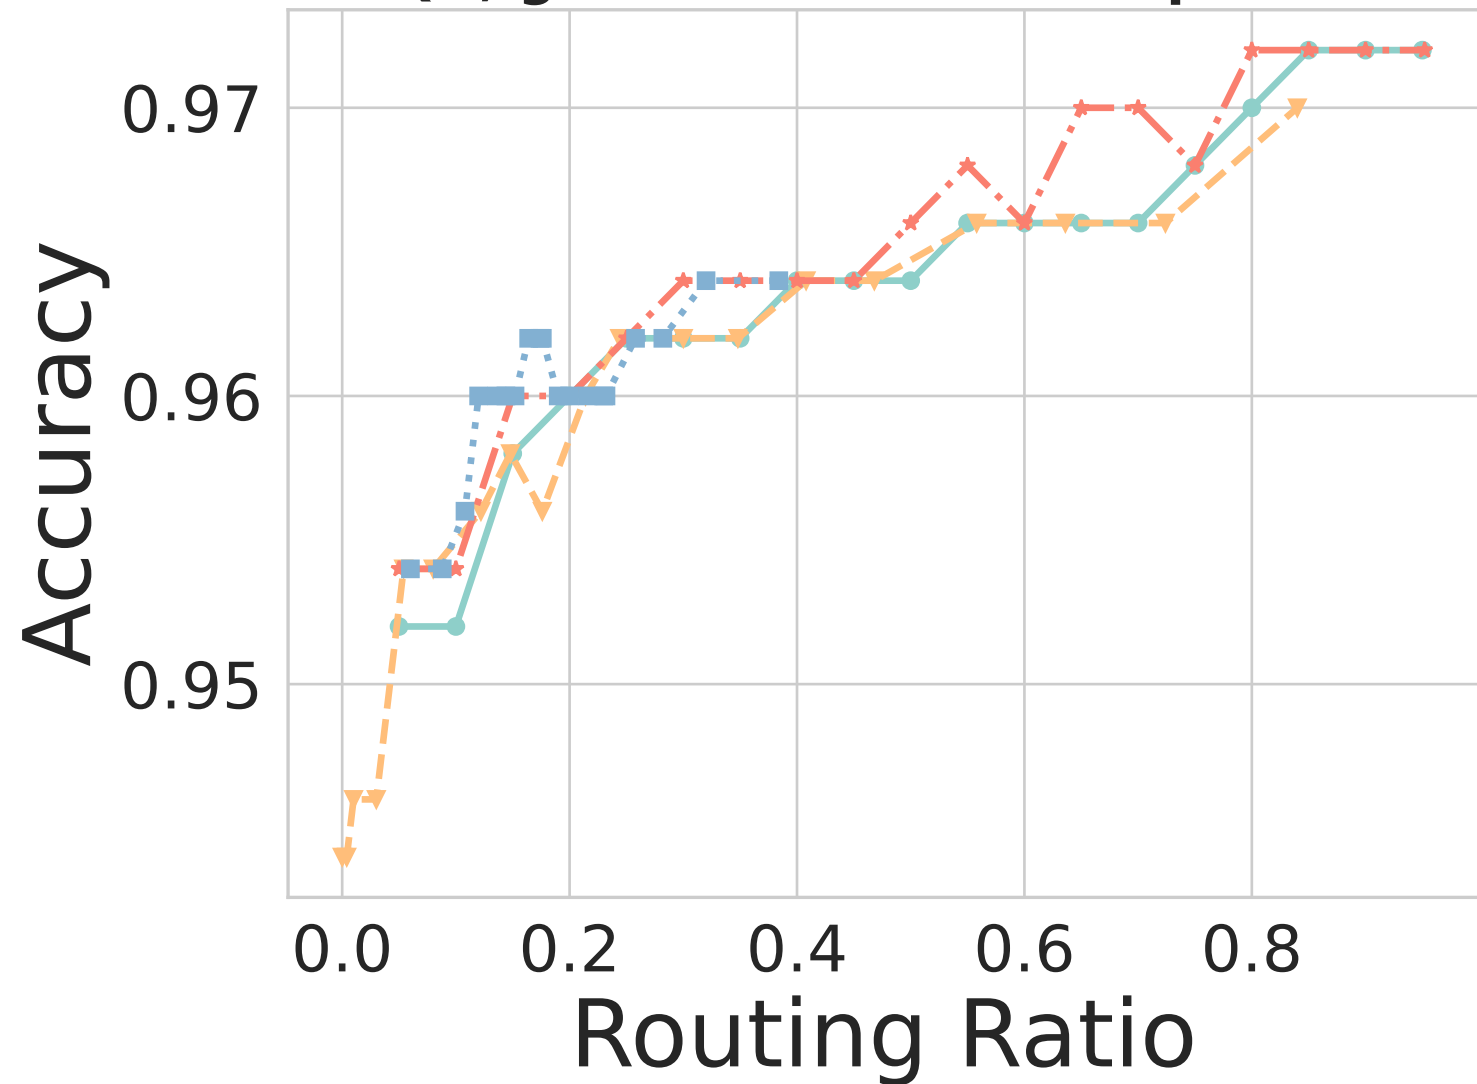

Supplement: supplementary_material [file cali_down_co_qa_granite-3.1-8b_deepseek-reasoner.pdf › Routing_SLM_LLMs/Proxy_routing_prediction/to_deepseek-reasoner/co_qa_as_downstream/cali_down_co_qa_granite-3.1-8b_deepseek-reasoner.pdf]

**CoQA, llama-3.1-8b to DeepSeek-R1**

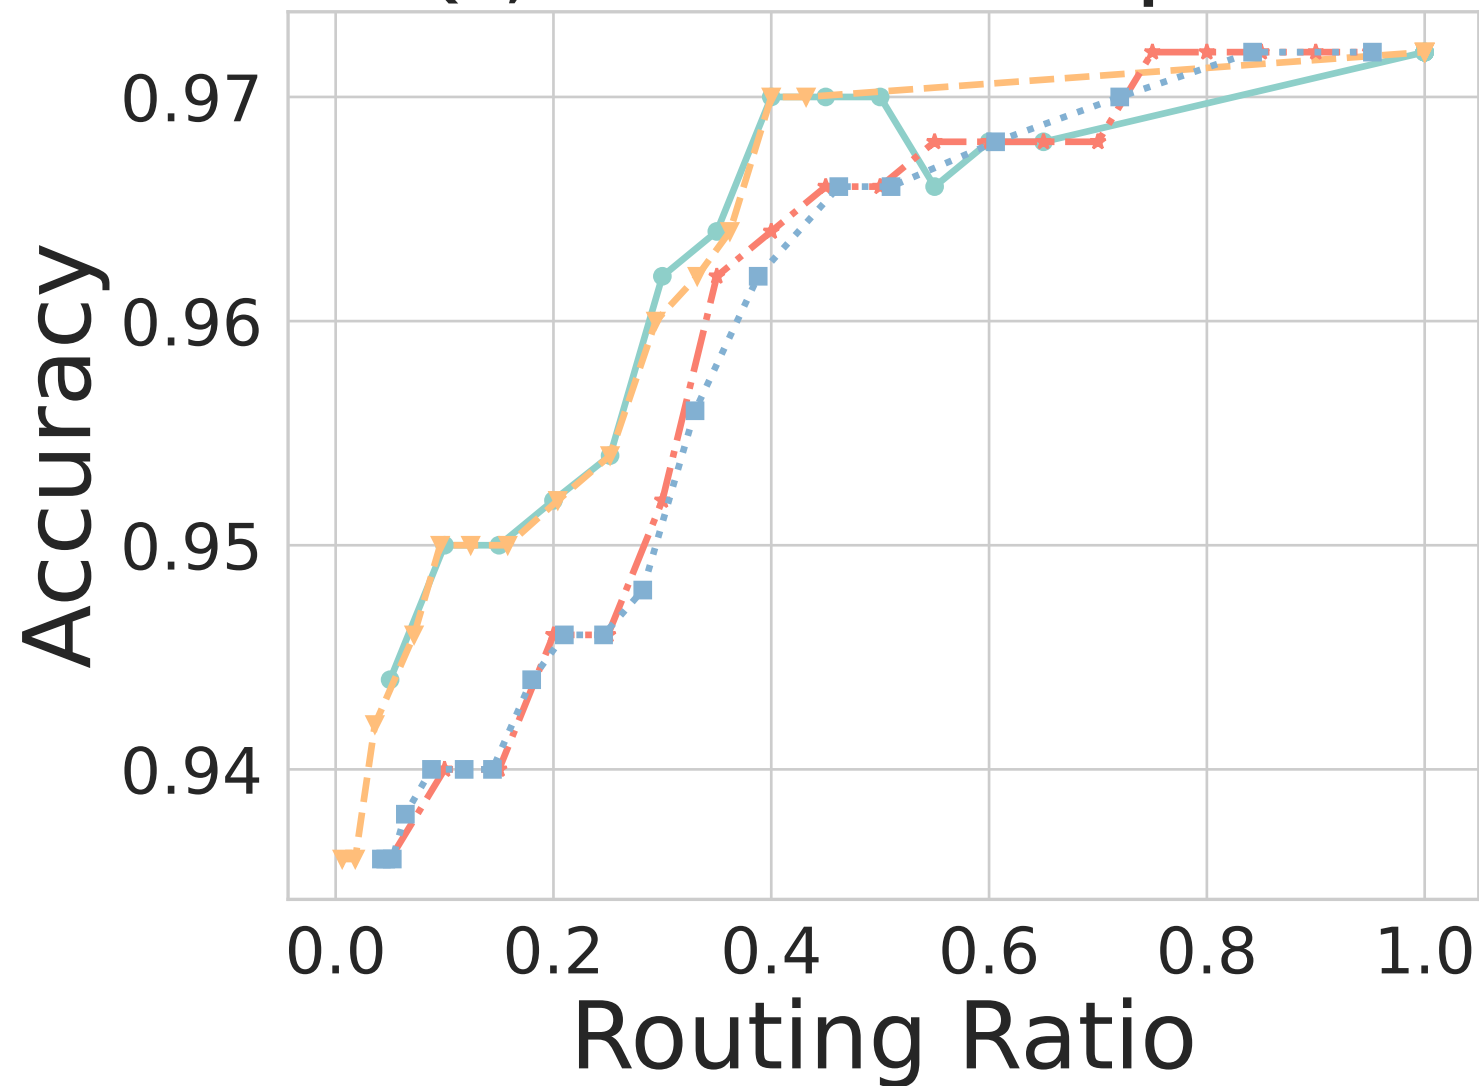

Supplement: supplementary_material [file cali_down_co_qa_llama-3.1-8b_deepseek-reasoner.pdf › Routing_SLM_LLMs/Proxy_routing_prediction/to_deepseek-reasoner/co_qa_as_downstream/cali_down_co_qa_llama-3.1-8b_deepseek-reasoner.pdf]

**CoQA, llama-3.2-1b to DeepSeek-R1**

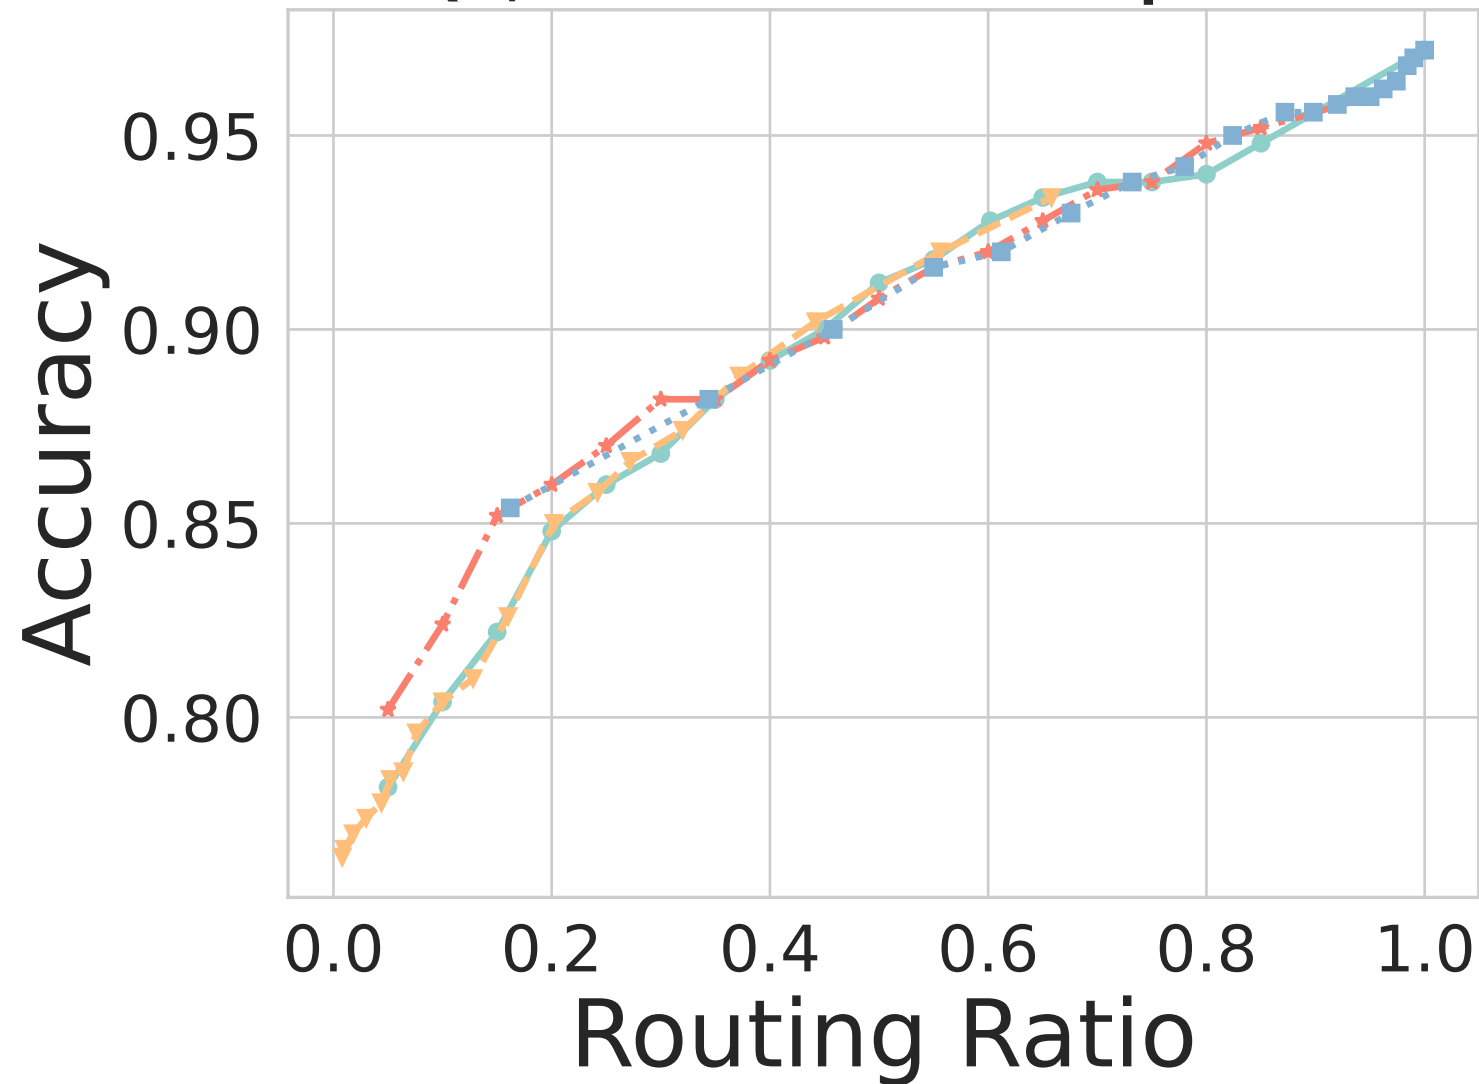

Supplement: supplementary_material [file cali_down_co_qa_llama-3.2-1b_deepseek-reasoner.pdf › Routing_SLM_LLMs/Proxy_routing_prediction/to_deepseek-reasoner/co_qa_as_downstream/cali_down_co_qa_llama-3.2-1b_deepseek-reasoner.pdf]

**CoQA, llama-3.2-3b to DeepSeek-R1**

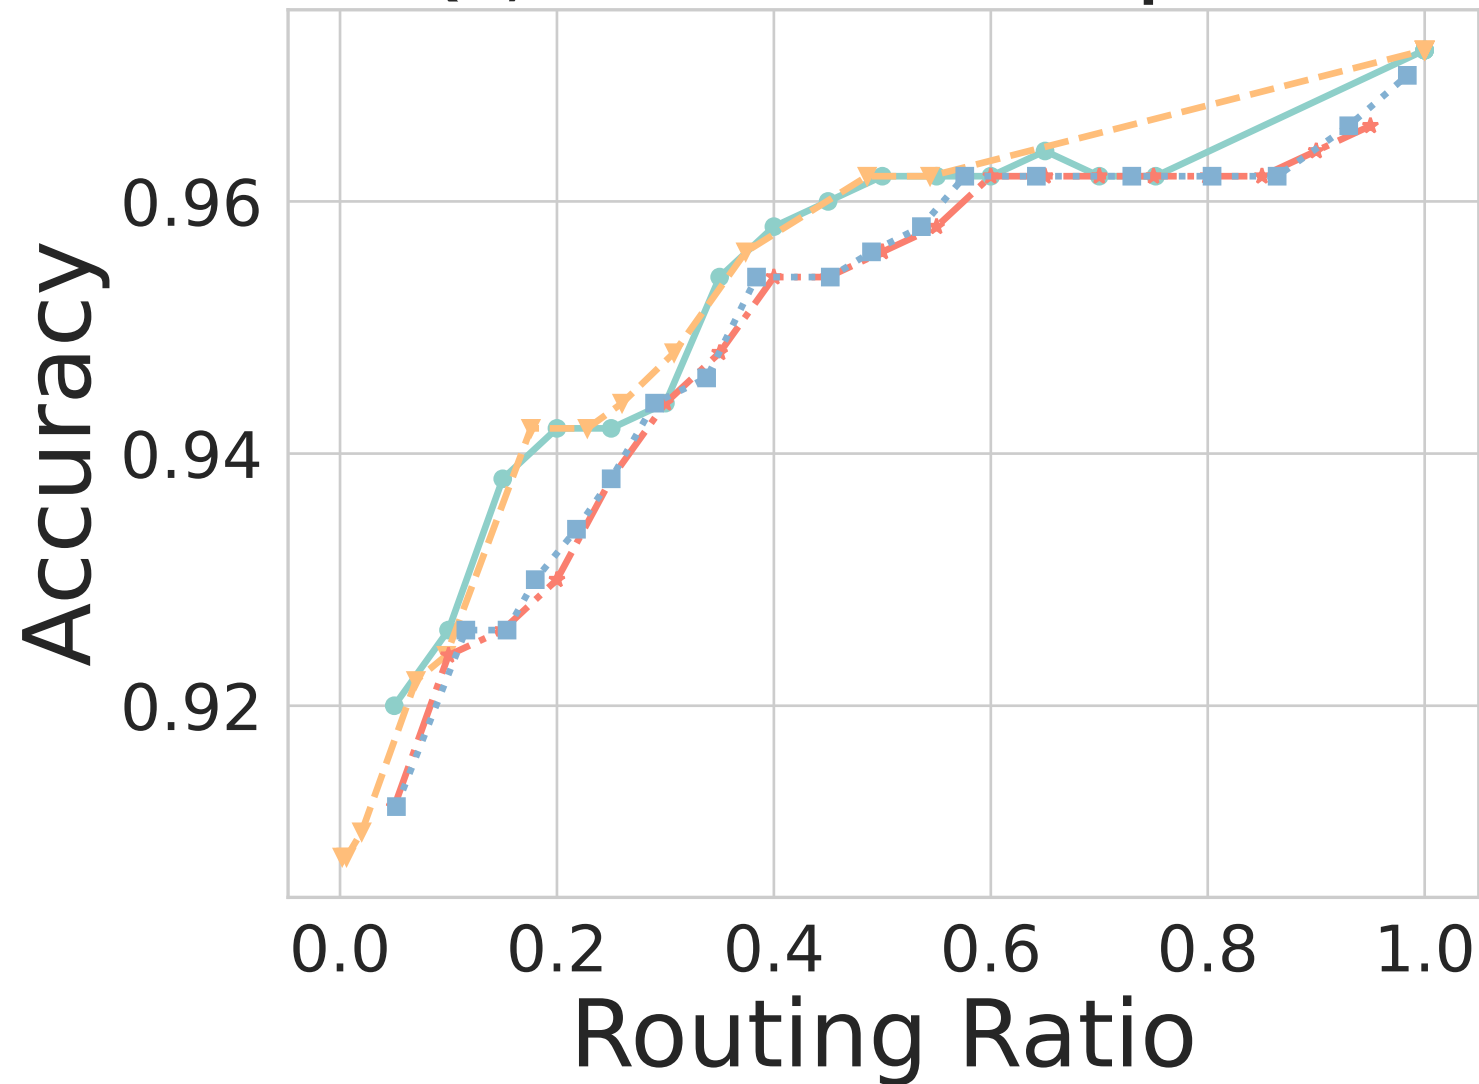

Supplement: supplementary_material [file cali_down_co_qa_llama-3.2-3b_deepseek-reasoner.pdf › Routing_SLM_LLMs/Proxy_routing_prediction/to_deepseek-reasoner/co_qa_as_downstream/cali_down_co_qa_llama-3.2-3b_deepseek-reasoner.pdf]

**CoQA, mistral-7b to DeepSeek-R1**

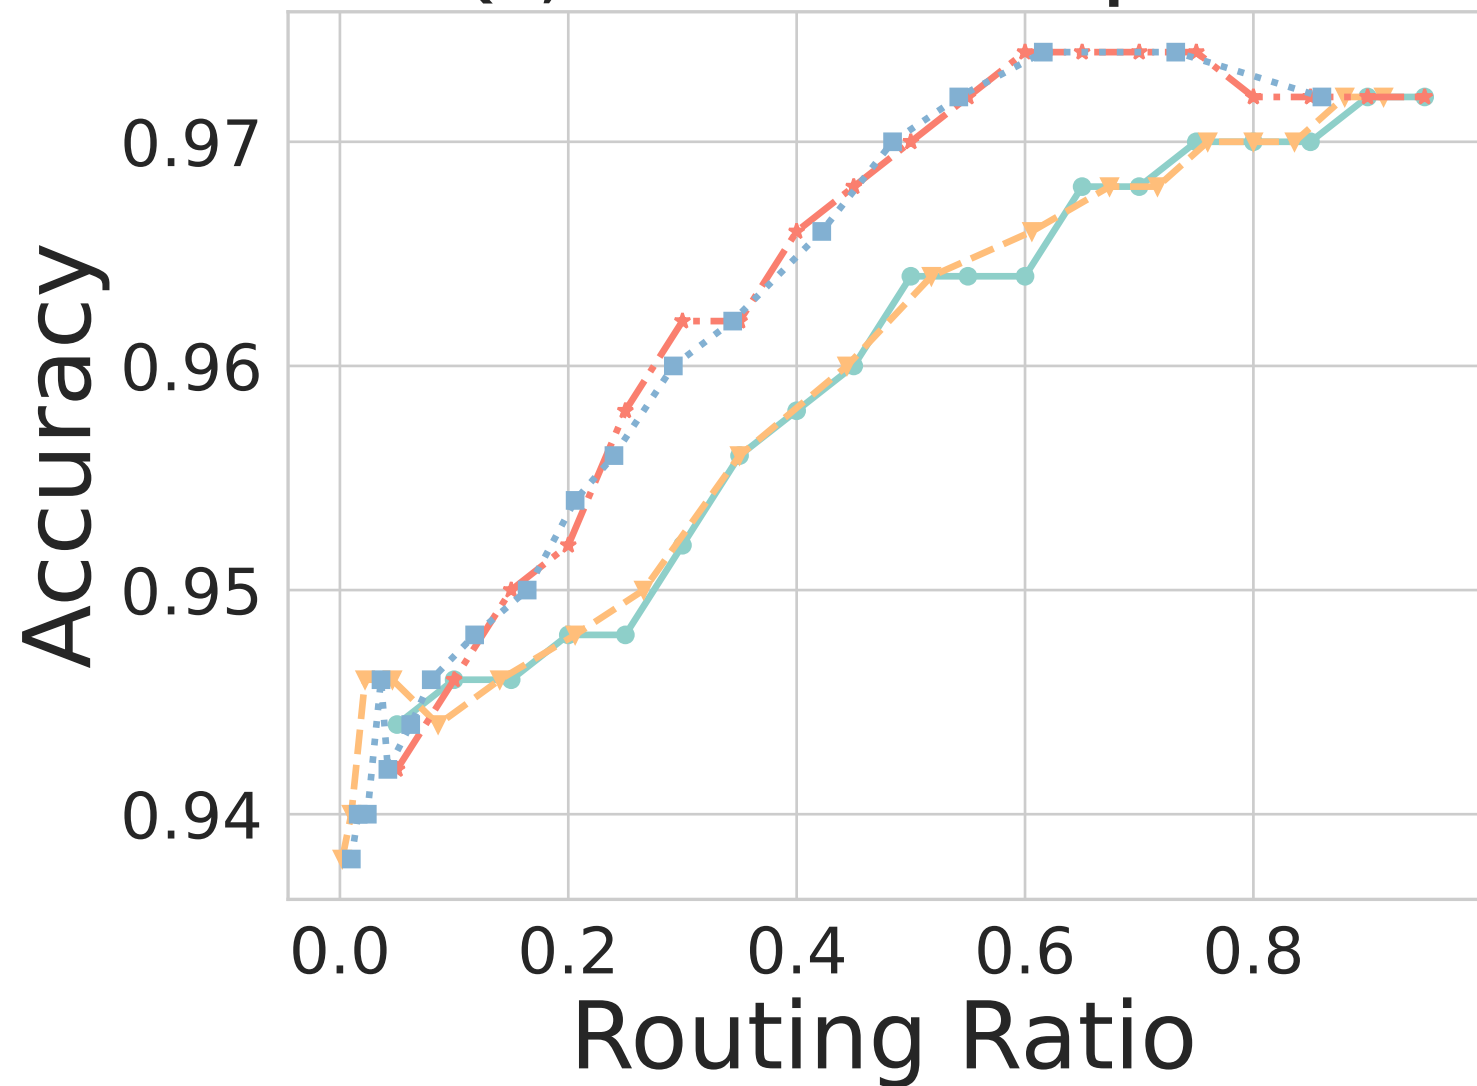

Supplement: supplementary_material [file cali_down_co_qa_mistral-7b_deepseek-reasoner.pdf › Routing_SLM_LLMs/Proxy_routing_prediction/to_deepseek-reasoner/co_qa_as_downstream/cali_down_co_qa_mistral-7b_deepseek-reasoner.pdf]

**CoQA, phi-3.5-mini to DeepSeek-R1**

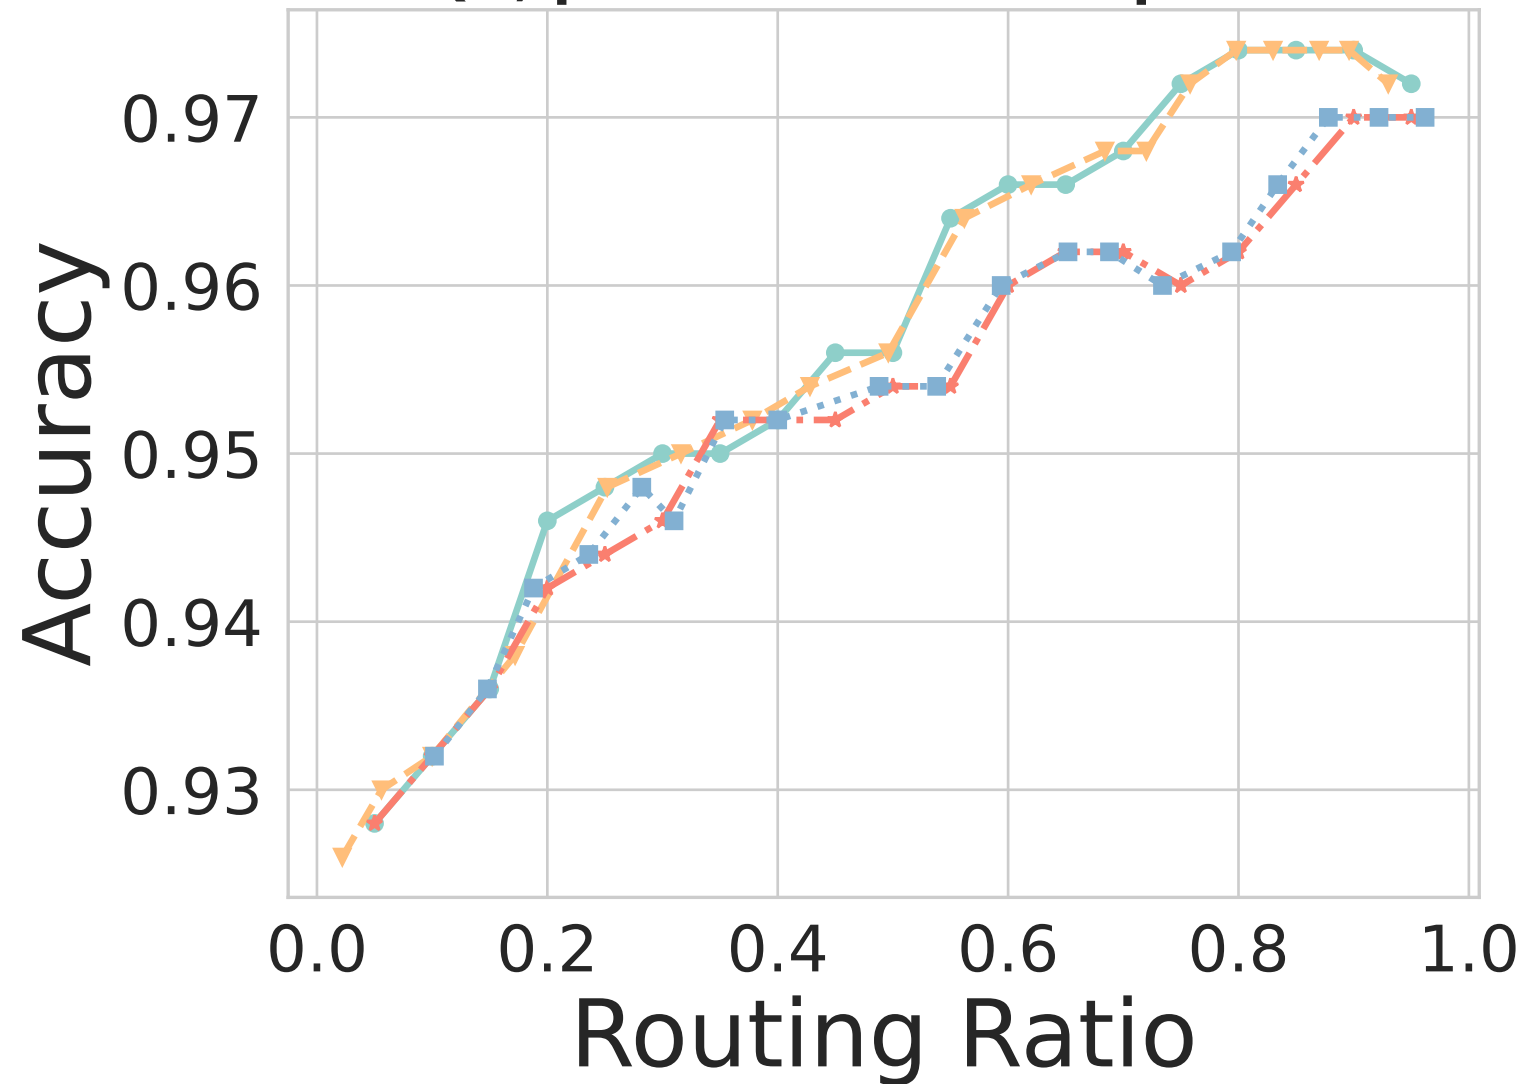

Supplement: supplementary_material [file cali_down_co_qa_phi-3.5-mini_deepseek-reasoner.pdf › Routing_SLM_LLMs/Proxy_routing_prediction/to_deepseek-reasoner/co_qa_as_downstream/cali_down_co_qa_phi-3.5-mini_deepseek-reasoner.pdf]

# CoQA, phi-4-mini-reasoning to DeepSeek-R1

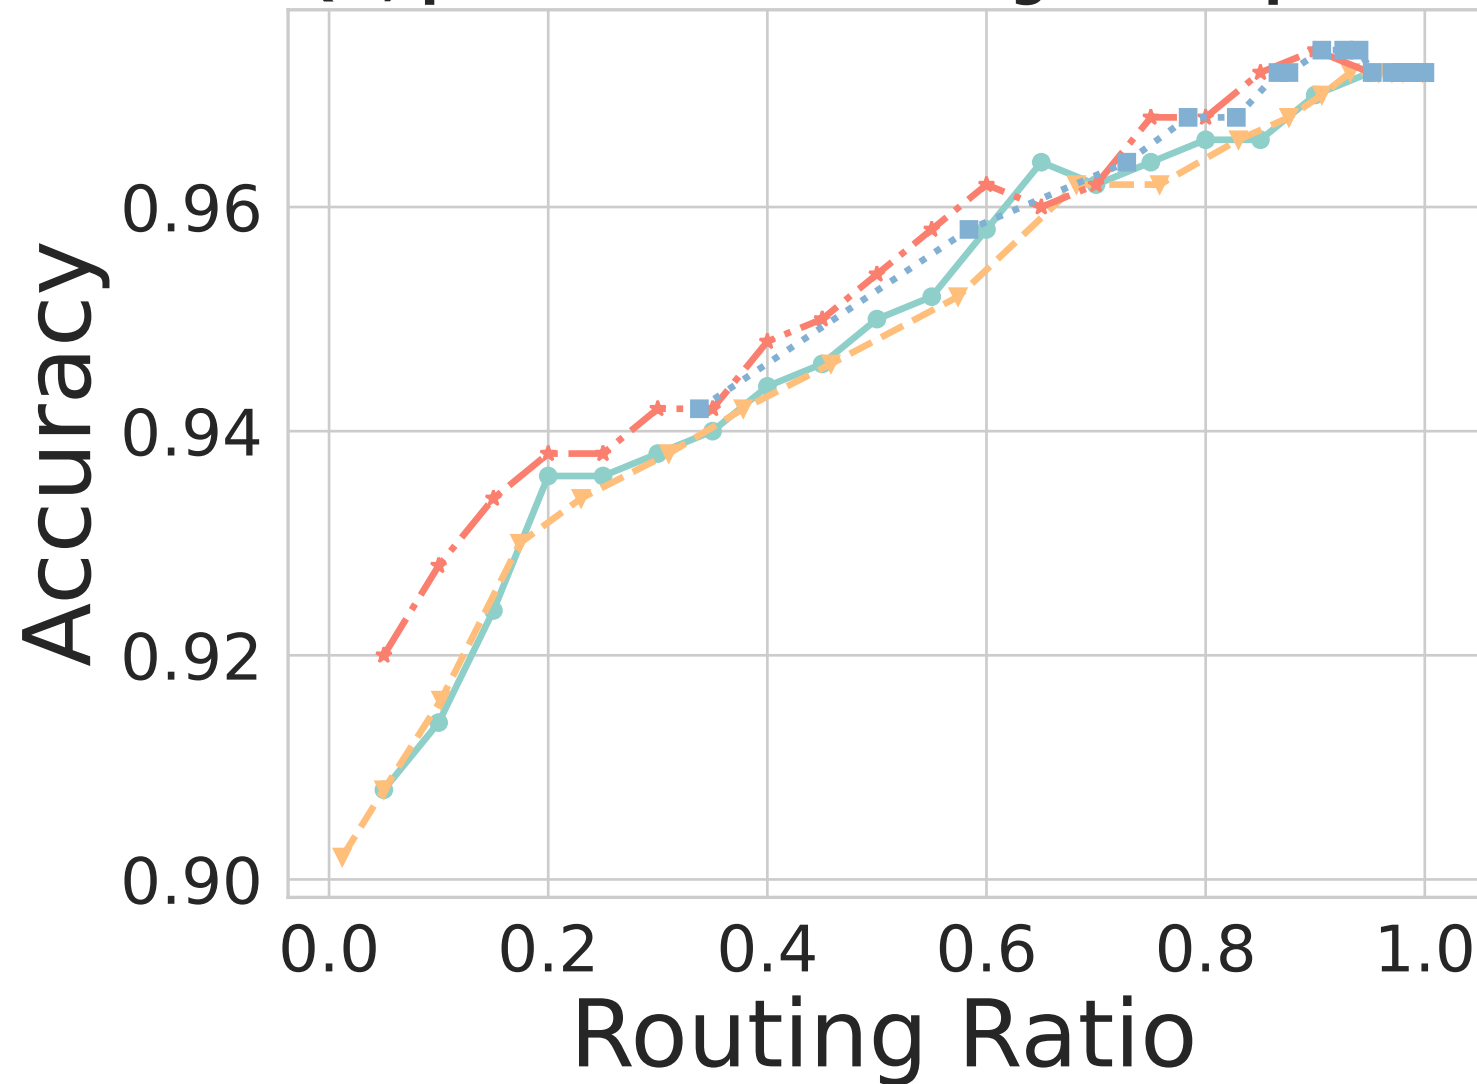

Supplement: supplementary_material [file cali_down_co_qa_phi-4-mini-reasoning_deepseek-reasoner.pdf › Routing_SLM_LLMs/Proxy_routing_prediction/to_deepseek-reasoner/co_qa_as_downstream/cali_down_co_qa_phi-4-mini-reasoning_deepseek-reasoner.pdf]

CoQA, qwen-2.5-7b to DeepSeek-R1

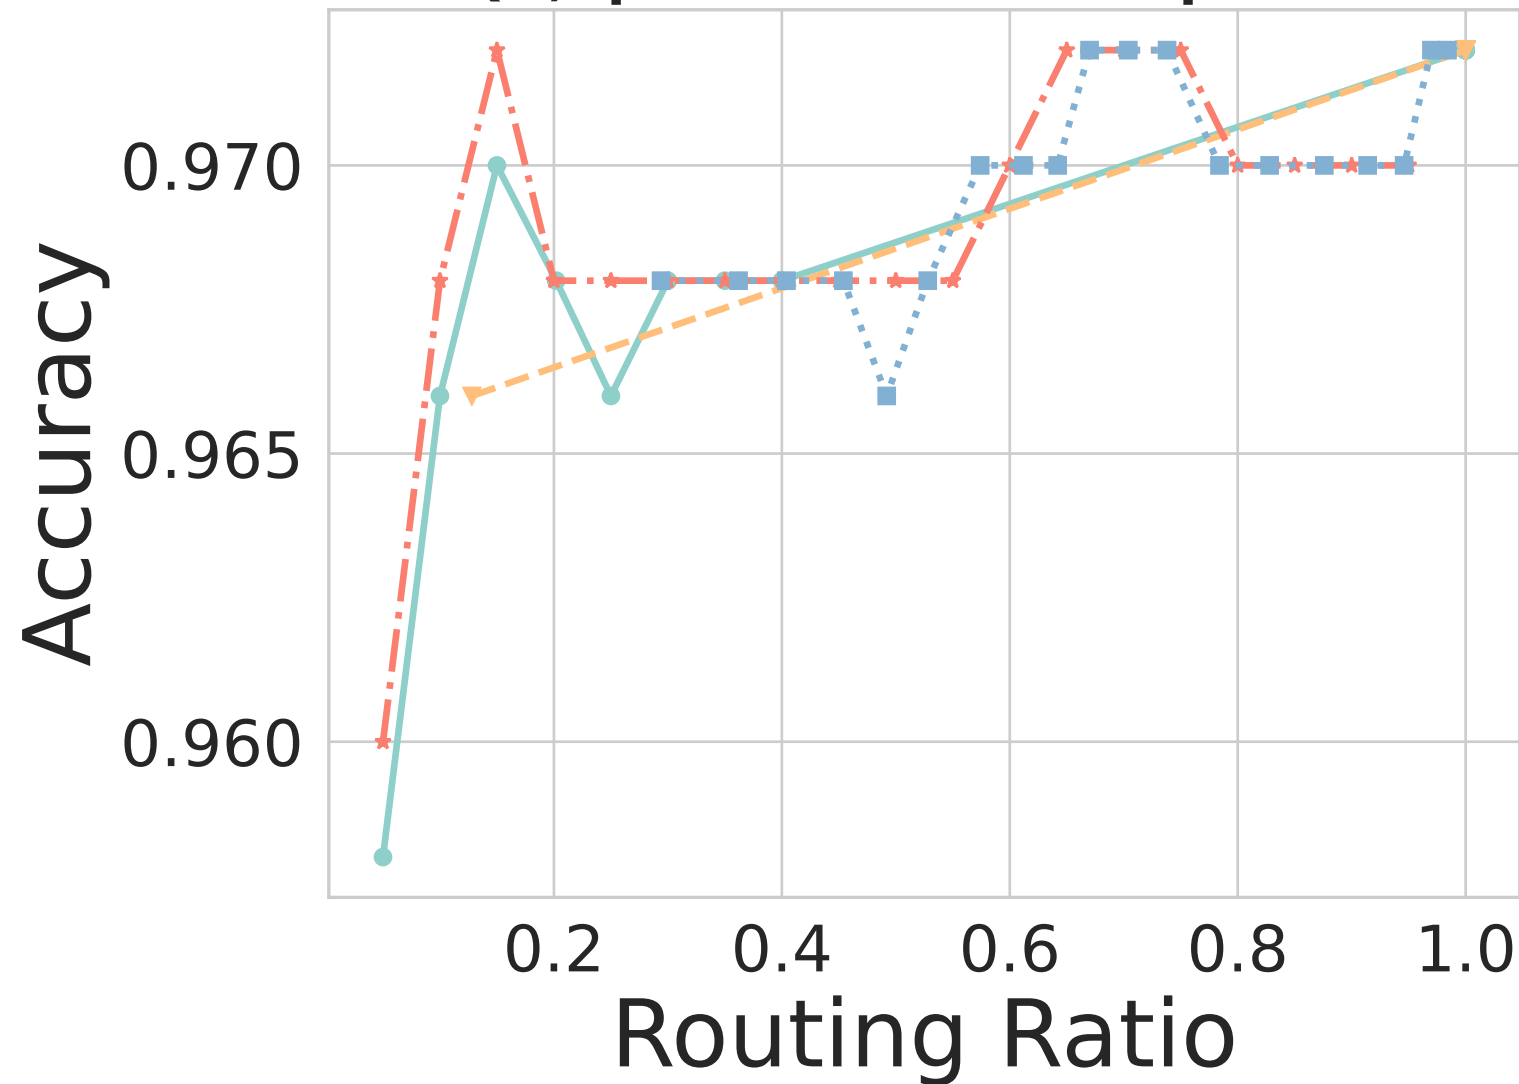

Supplement: supplementary_material [file cali_down_co_qa_qwen-2.5-7b_deepseek-reasoner.pdf › Routing_SLM_LLMs/Proxy_routing_prediction/to_deepseek-reasoner/co_qa_as_downstream/cali_down_co_qa_qwen-2.5-7b_deepseek-reasoner.pdf]

**CoQA, rwkv to DeepSeek-R1**

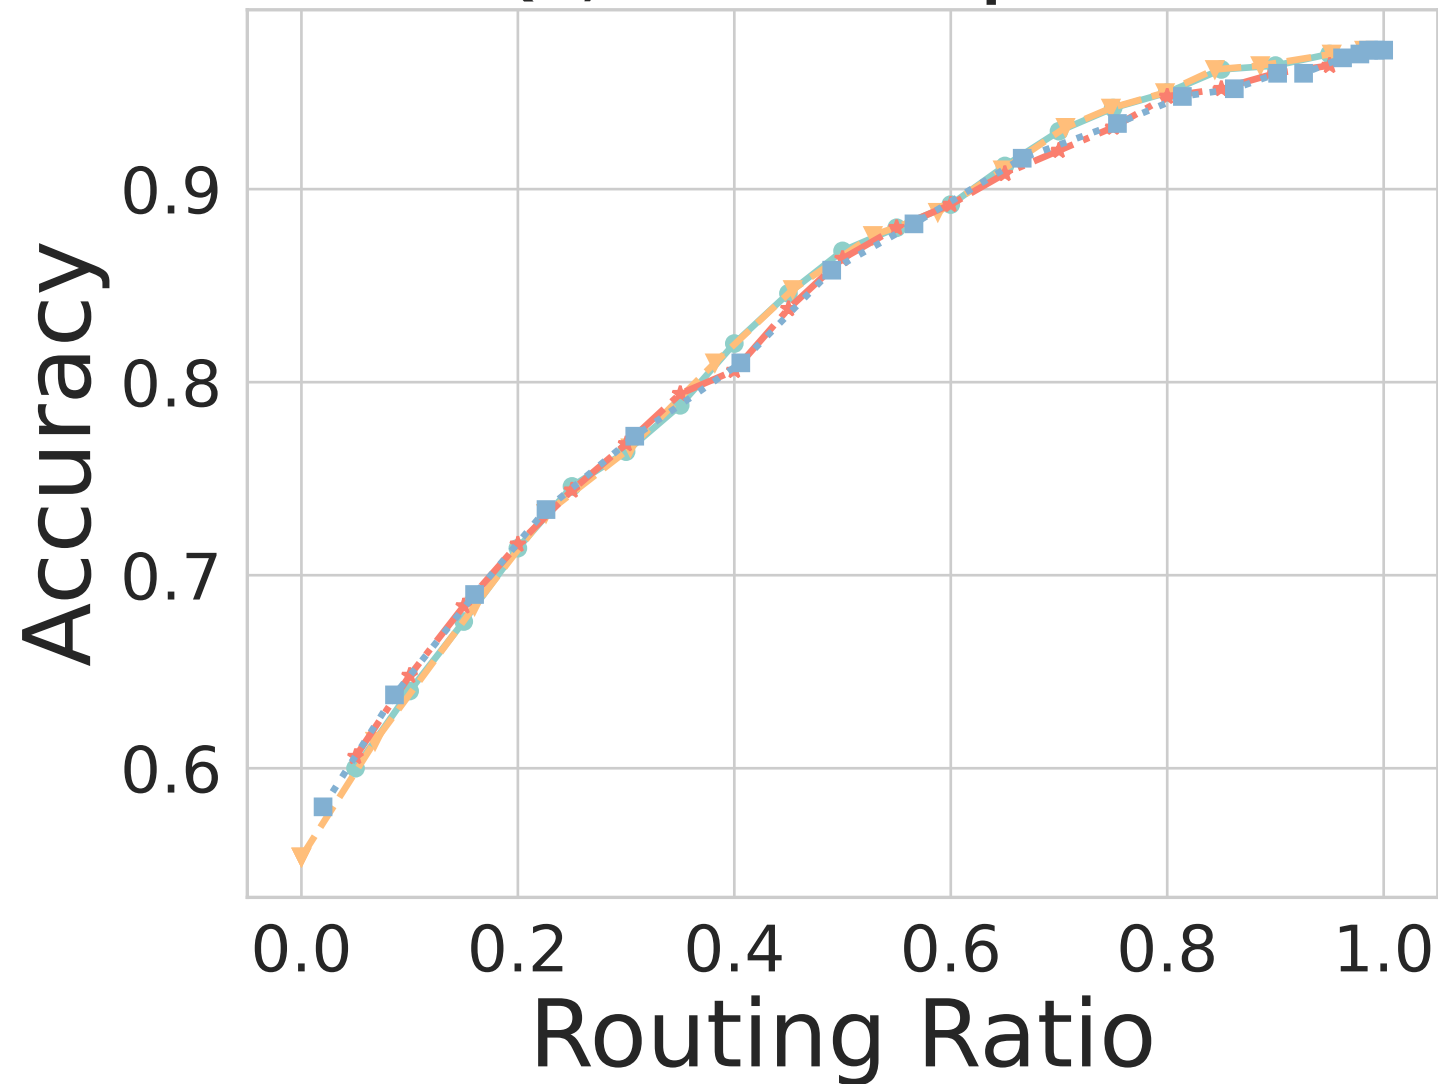

Supplement: supplementary_material [file cali_down_co_qa_rwkv_deepseek-reasoner.pdf › Routing_SLM_LLMs/Proxy_routing_prediction/to_deepseek-reasoner/co_qa_as_downstream/cali_down_co_qa_rwkv_deepseek-reasoner.pdf]

# CommonsenseQA, Qwen3-0.6B to DeepSeek-R1

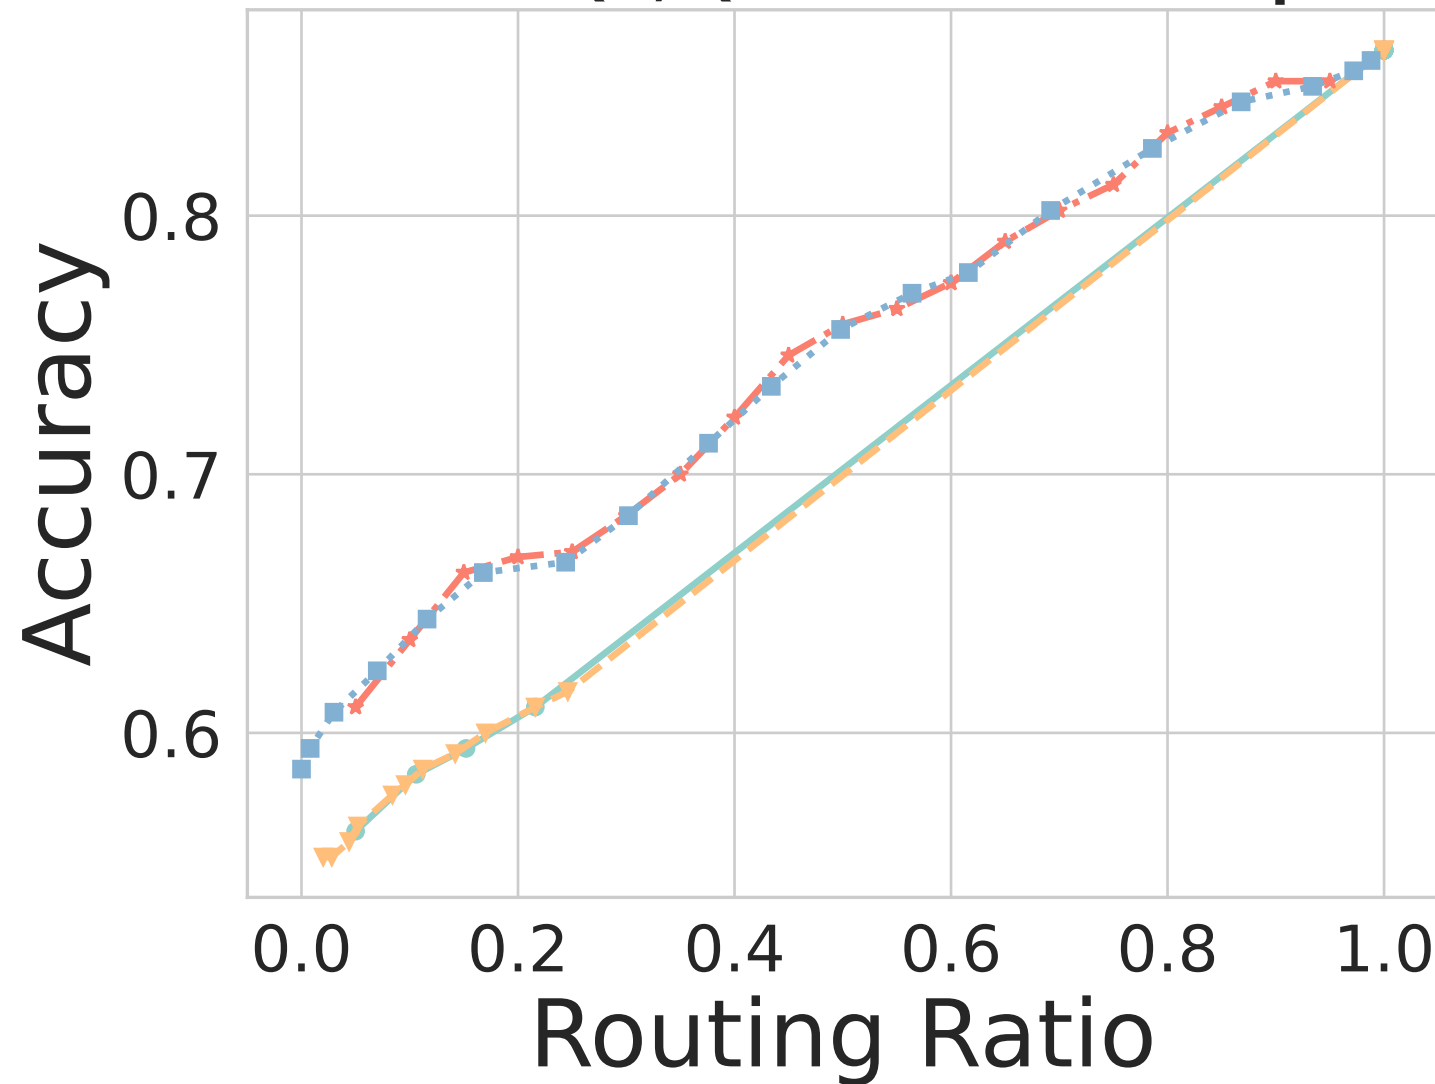

Supplement: supplementary_material [file cali_down_commonsense_qa_Qwen3-0.6B_deepseek-reasoner.pdf › Routing_SLM_LLMs/Proxy_routing_prediction/to_deepseek-reasoner/commonsense_qa_as_downstream/cali_down_commonsense_qa_Qwen3-0.6B_deepseek-reasoner.pdf]

**CommonsenseQA, Qwen3-1.7B to DeepSeek-R1**

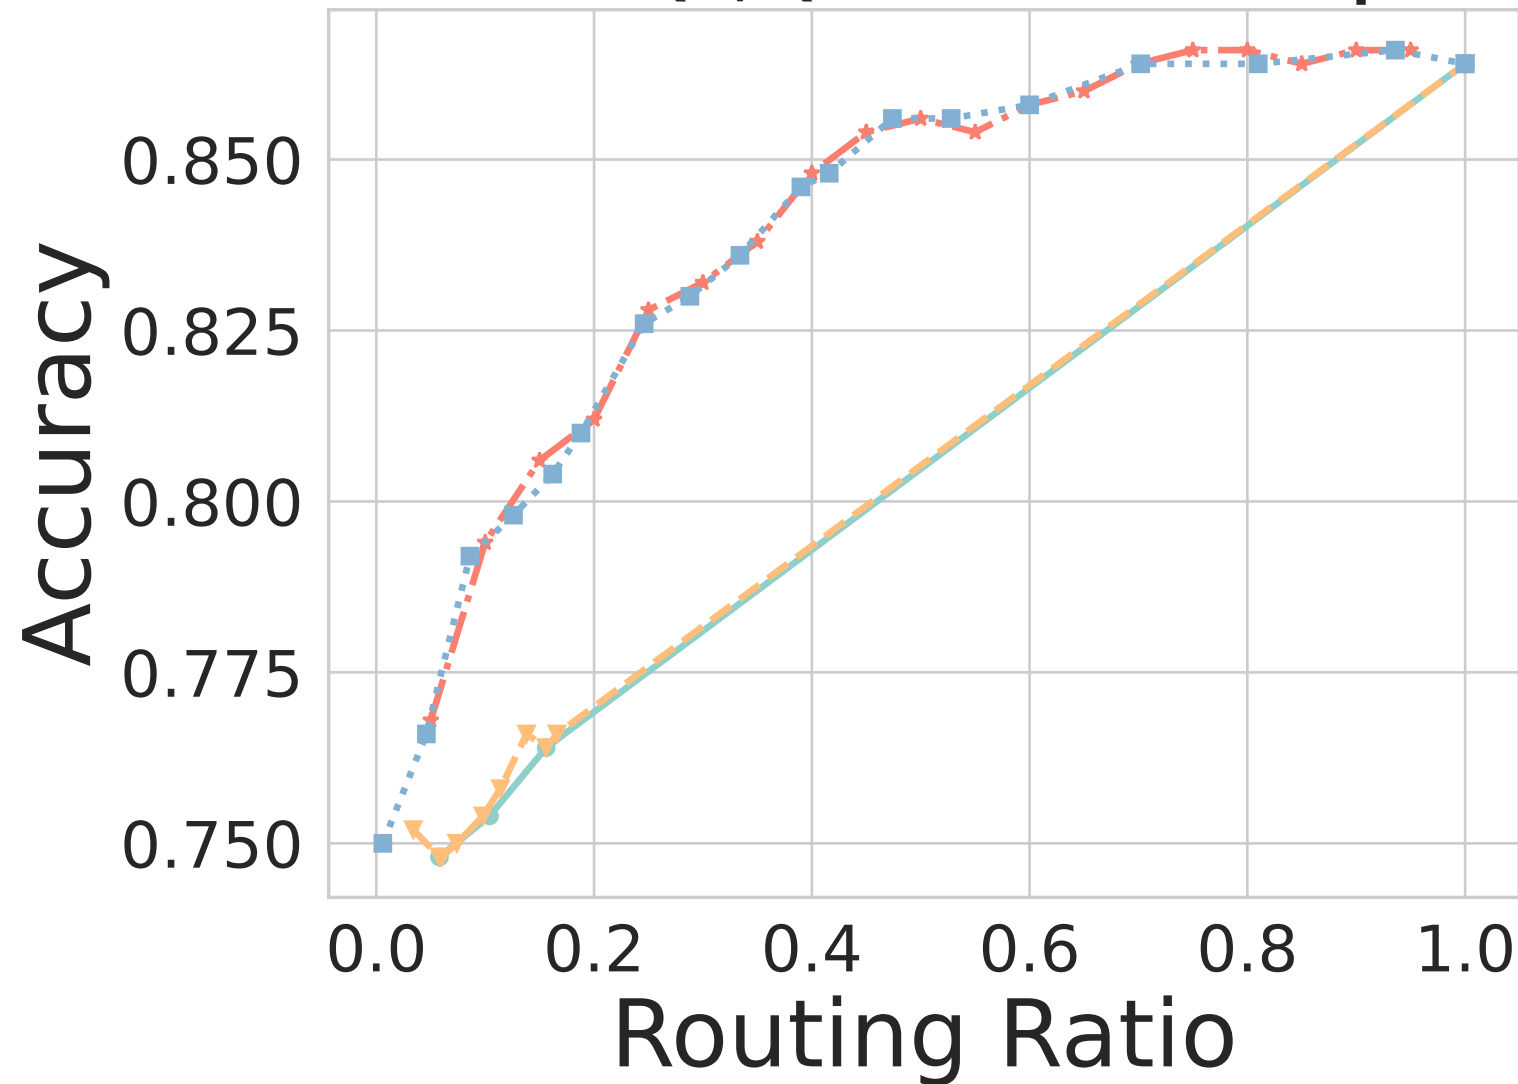

Supplement: supplementary_material [file cali_down_commonsense_qa_Qwen3-1.7B_deepseek-reasoner.pdf › Routing_SLM_LLMs/Proxy_routing_prediction/to_deepseek-reasoner/commonsense_qa_as_downstream/cali_down_commonsense_qa_Qwen3-1.7B_deepseek-reasoner.pdf]

# CommonsenseQA, Qwen3-4B to DeepSeek-R1

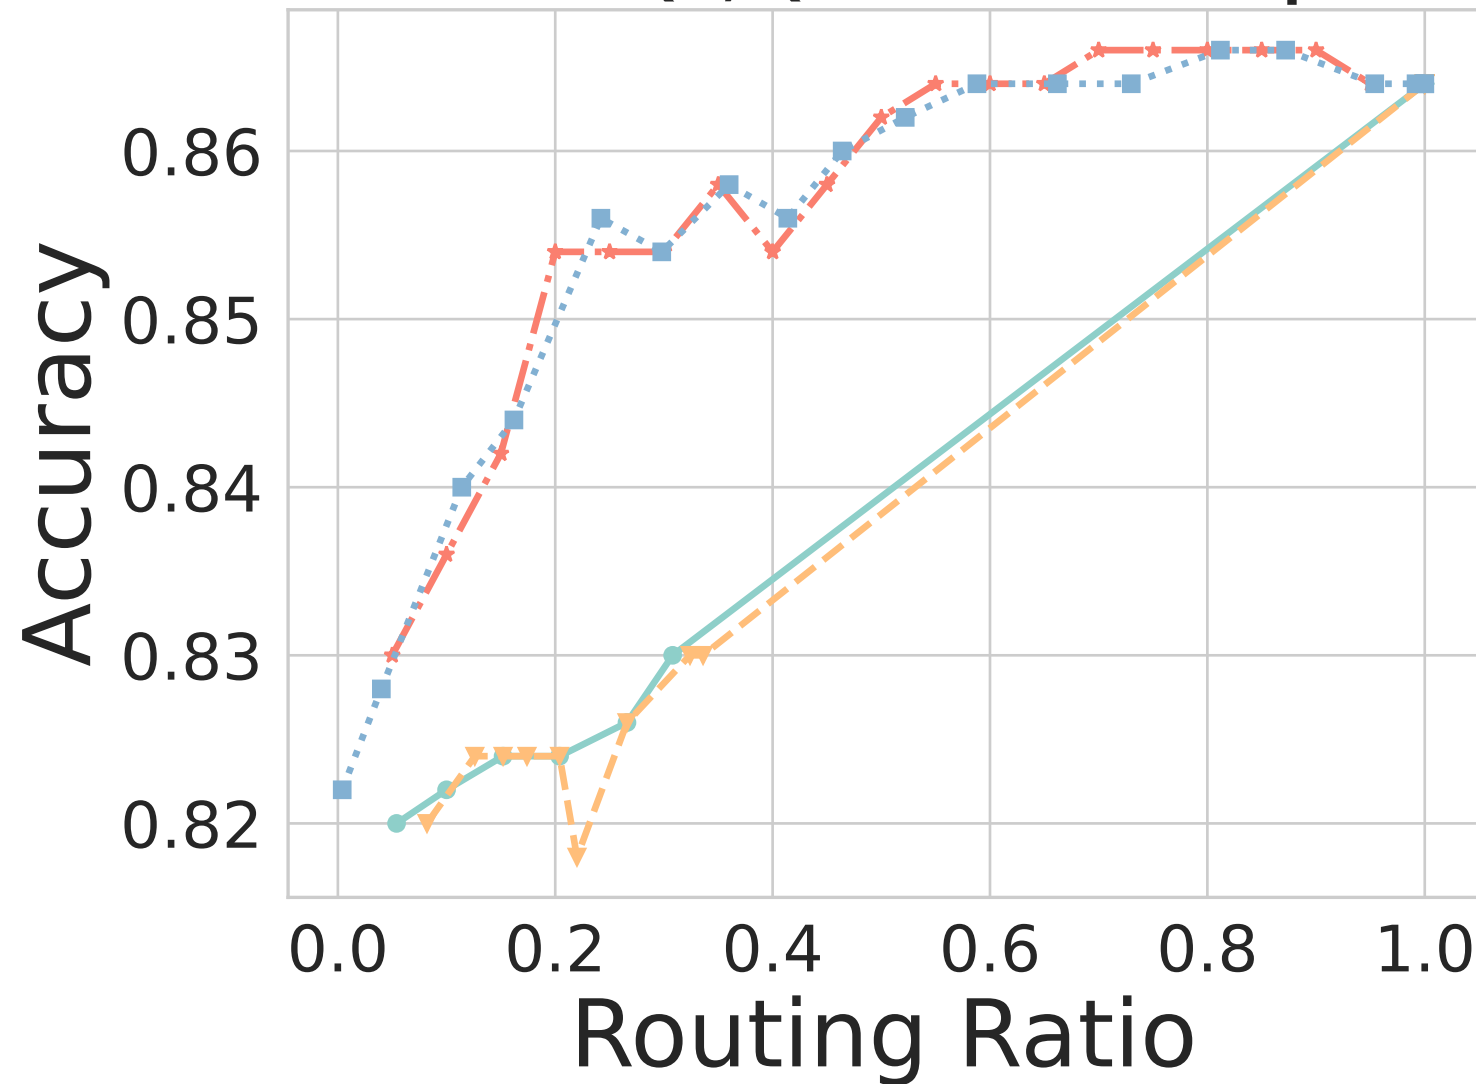

Supplement: supplementary_material [file cali_down_commonsense_qa_Qwen3-4B_deepseek-reasoner.pdf › Routing_SLM_LLMs/Proxy_routing_prediction/to_deepseek-reasoner/commonsense_qa_as_downstream/cali_down_commonsense_qa_Qwen3-4B_deepseek-reasoner.pdf]

**CommonsenseQA, granite-3.1-8b to DeepSeek-R1**

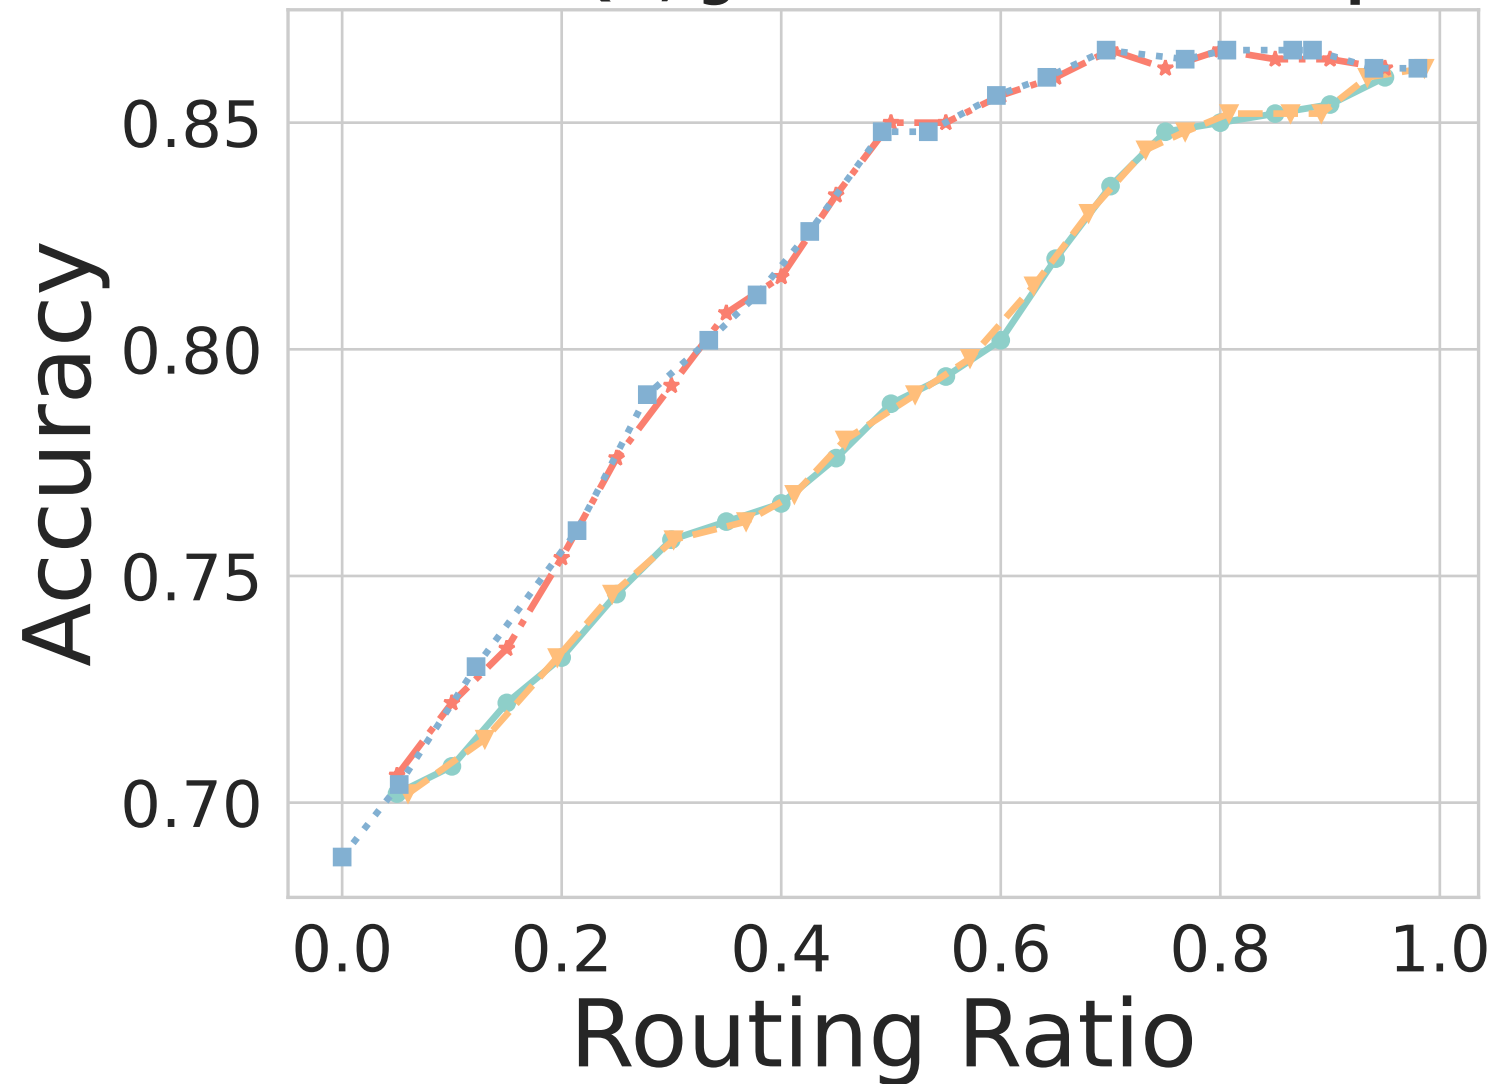

Supplement: supplementary_material [file cali_down_commonsense_qa_granite-3.1-8b_deepseek-reasoner.pdf › Routing_SLM_LLMs/Proxy_routing_prediction/to_deepseek-reasoner/commonsense_qa_as_downstream/cali_down_commonsense_qa_granite-3.1-8b_deepseek-reasoner.pdf]

# CommonsenseQA, llama-3.1-8b to DeepSeek-R1

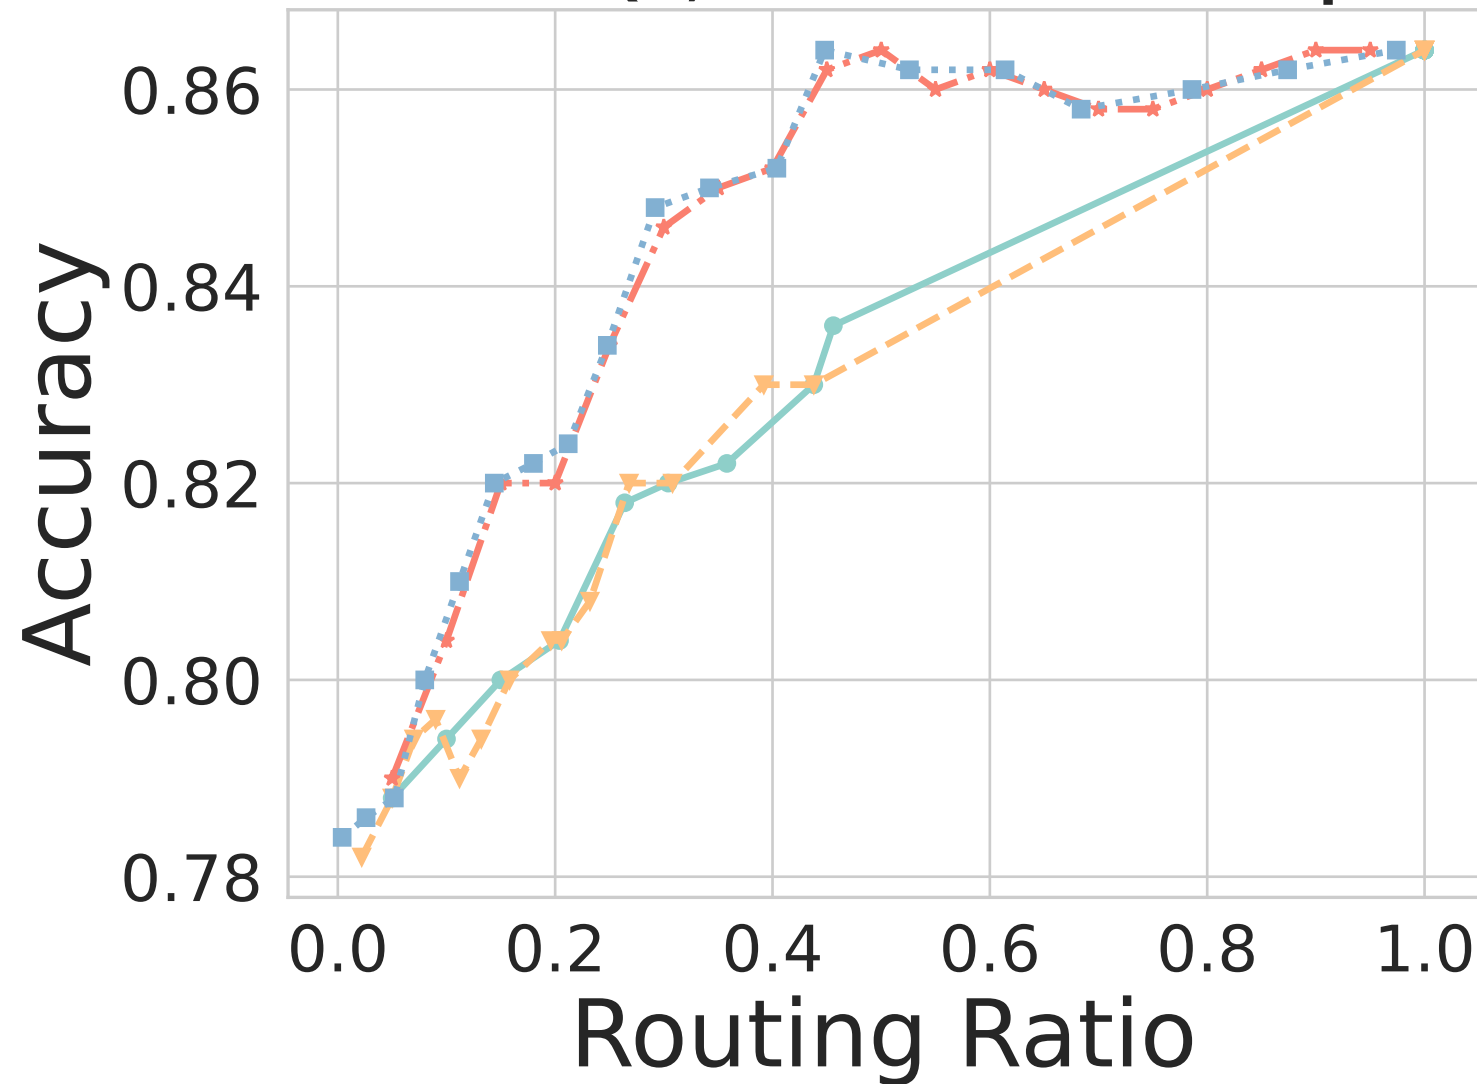

Supplement: supplementary_material [file cali_down_commonsense_qa_llama-3.1-8b_deepseek-reasoner.pdf › Routing_SLM_LLMs/Proxy_routing_prediction/to_deepseek-reasoner/commonsense_qa_as_downstream/cali_down_commonsense_qa_llama-3.1-8b_deepseek-reasoner.pdf]

# CommonsenseQA, llama-3.2-1b to DeepSeek-R1

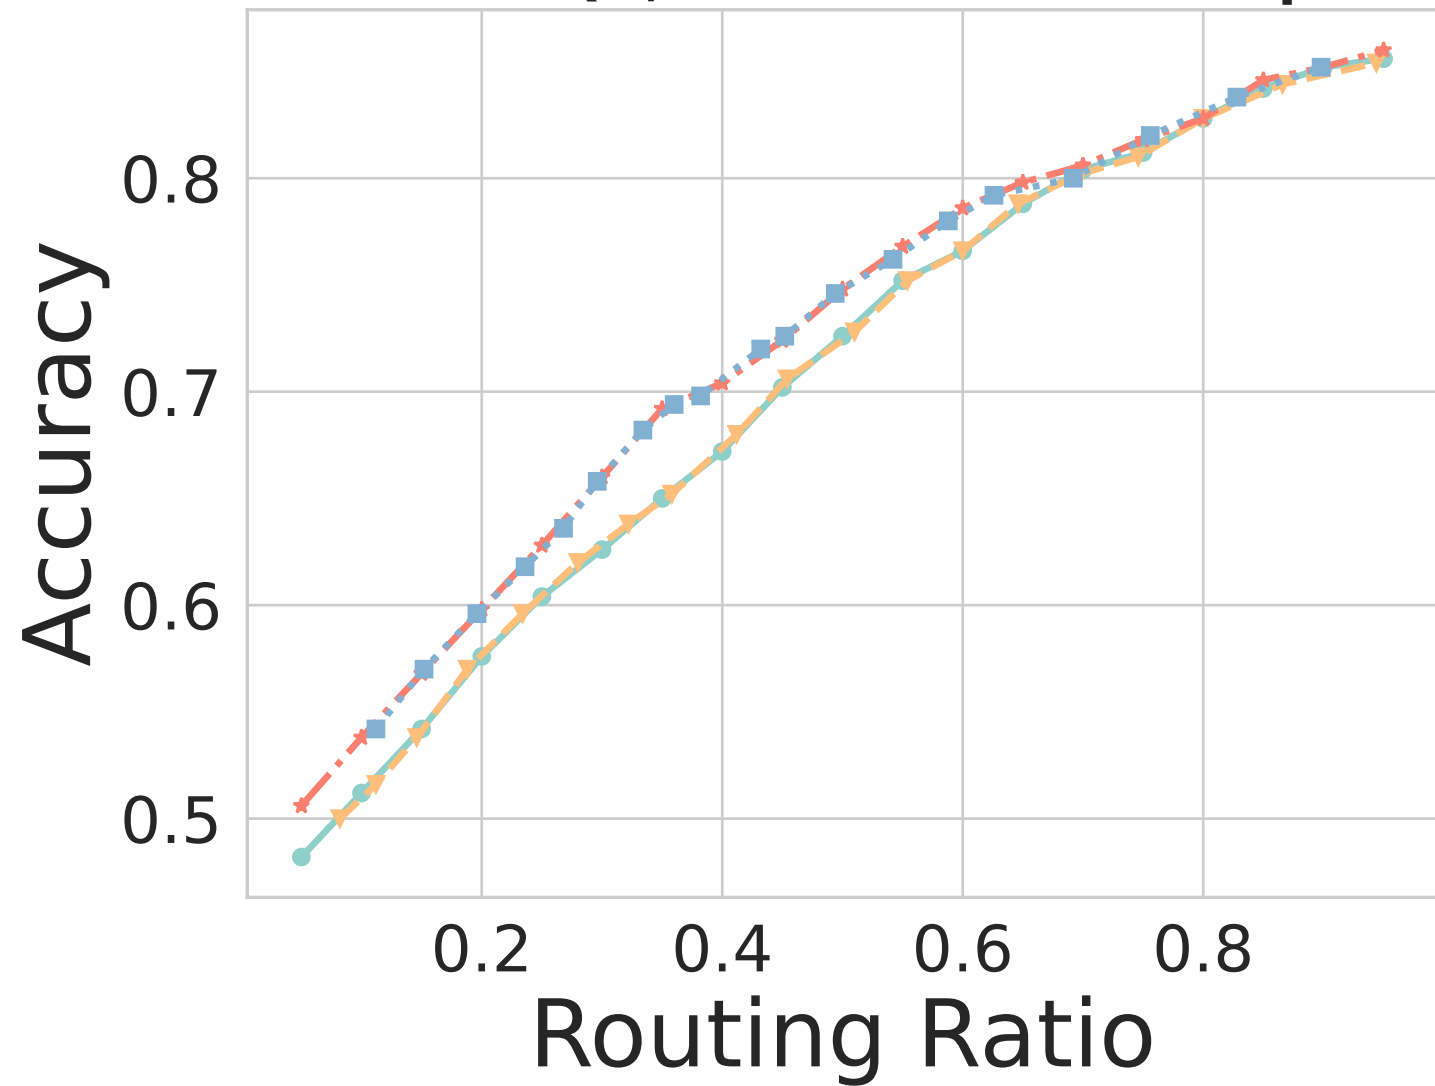

Supplement: supplementary_material [file cali_down_commonsense_qa_llama-3.2-1b_deepseek-reasoner.pdf › Routing_SLM_LLMs/Proxy_routing_prediction/to_deepseek-reasoner/commonsense_qa_as_downstream/cali_down_commonsense_qa_llama-3.2-1b_deepseek-reasoner.pdf]

**CommonsenseQA, llama-3.2-3b to DeepSeek-R1**

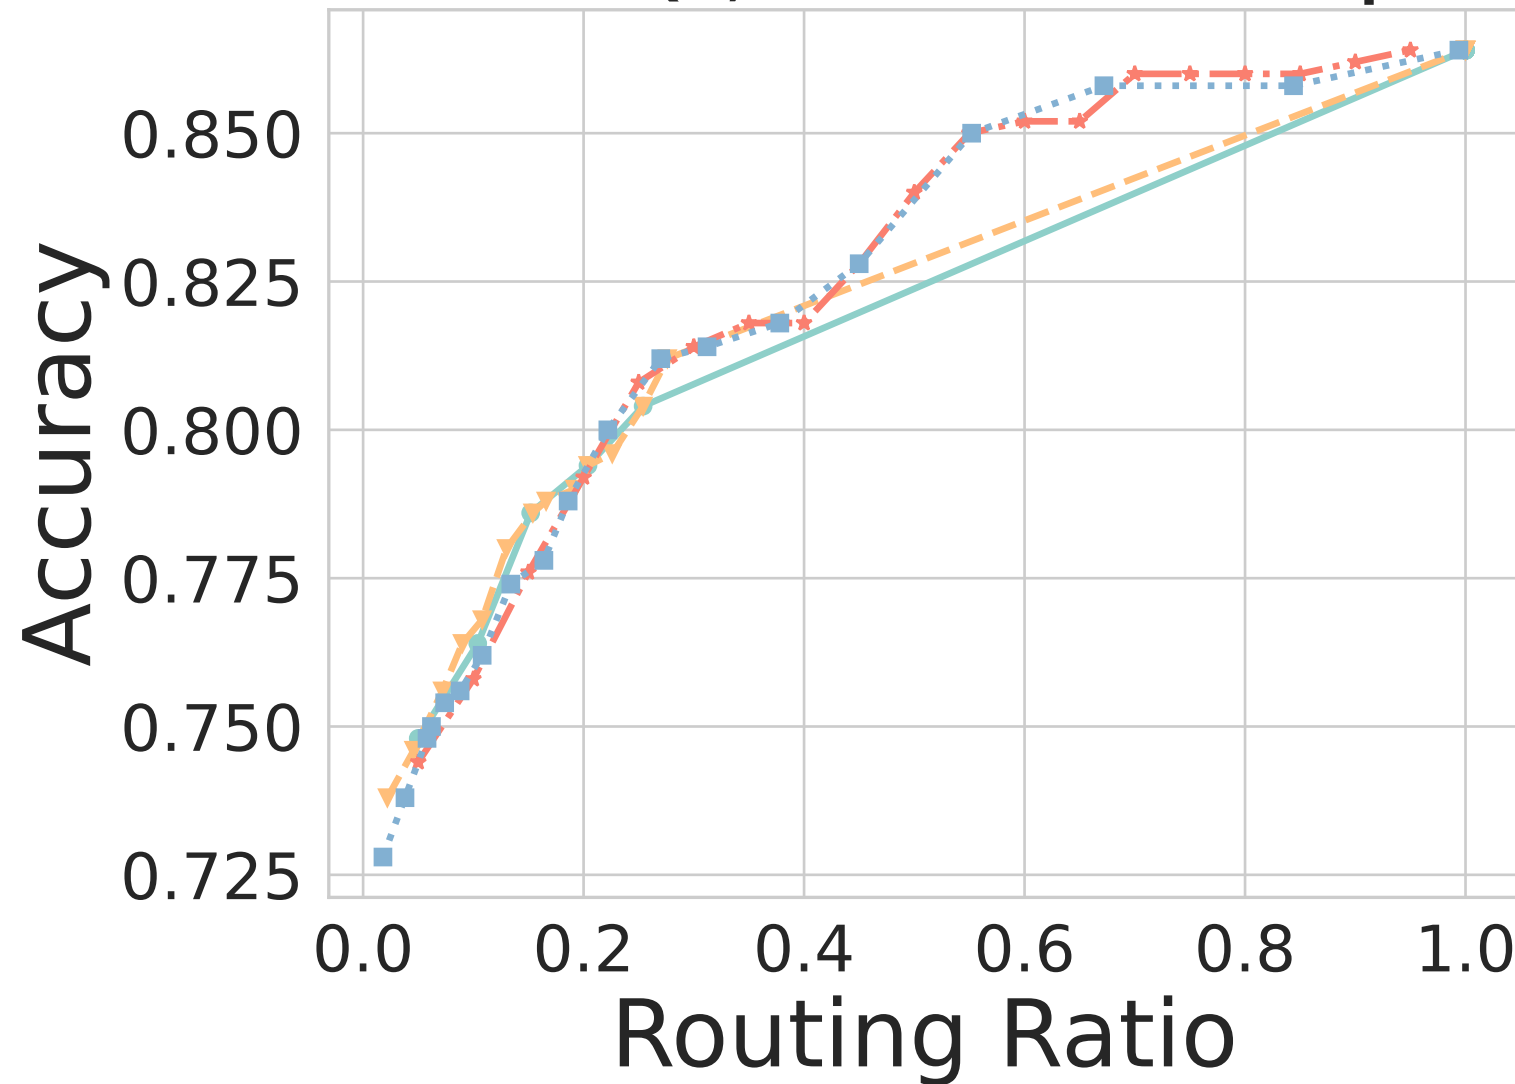

Supplement: supplementary_material [file cali_down_commonsense_qa_llama-3.2-3b_deepseek-reasoner.pdf › Routing_SLM_LLMs/Proxy_routing_prediction/to_deepseek-reasoner/commonsense_qa_as_downstream/cali_down_commonsense_qa_llama-3.2-3b_deepseek-reasoner.pdf]

# CommonsenseQA, mistral-7b to DeepSeek-R1

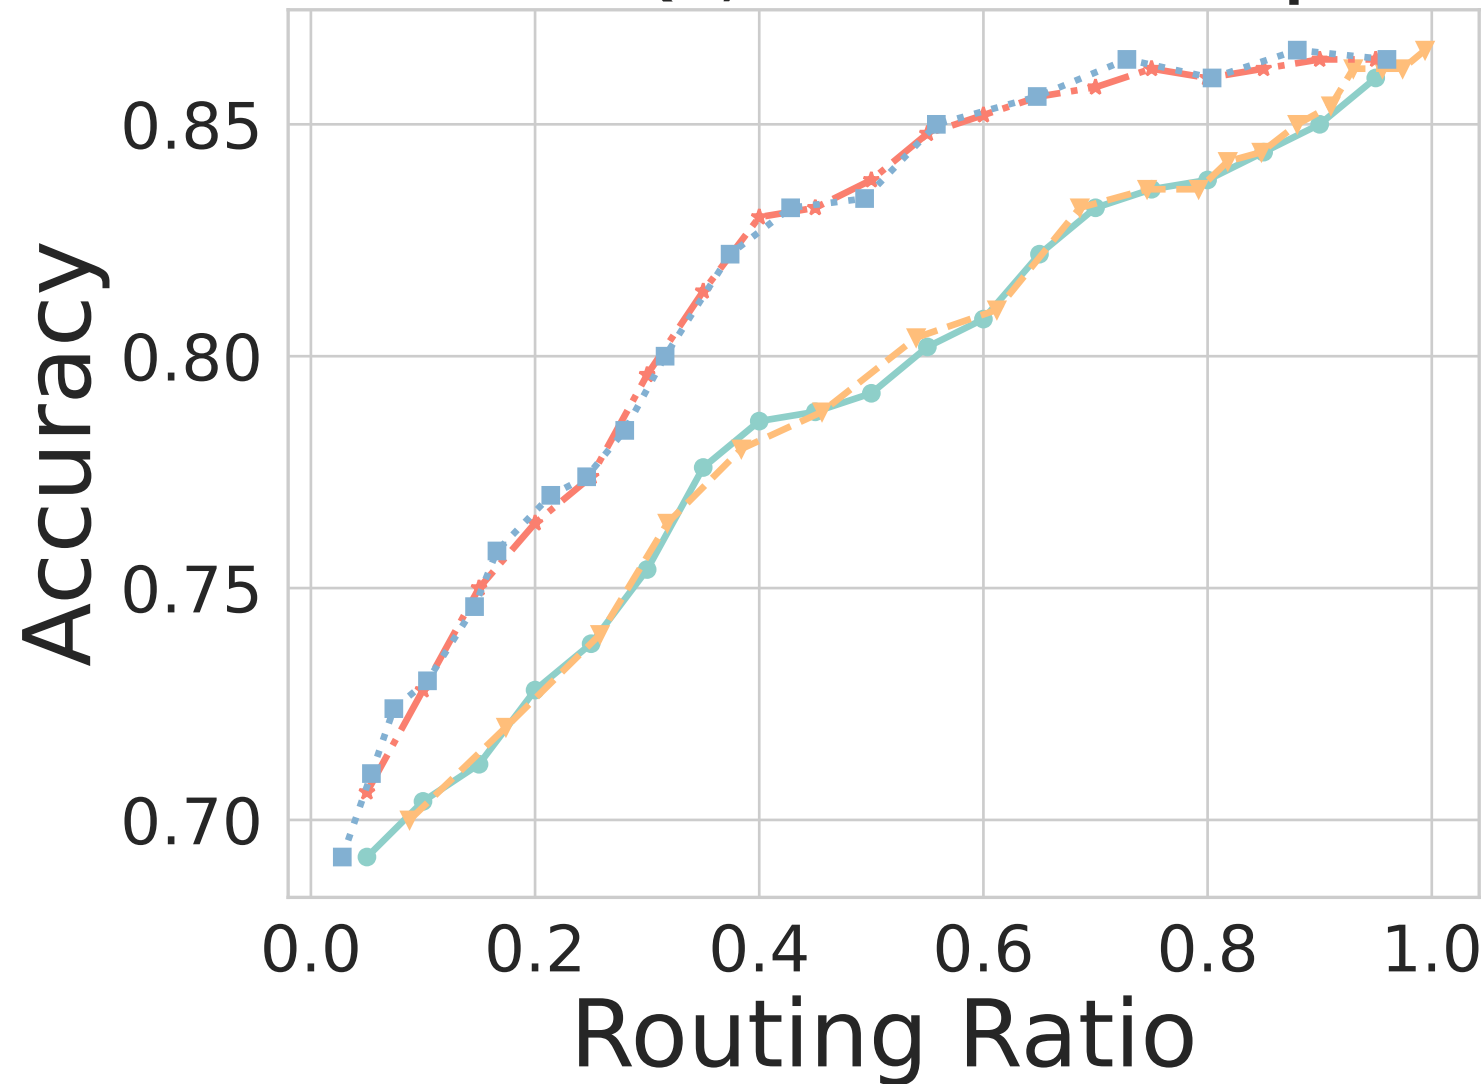

Supplement: supplementary_material [file cali_down_commonsense_qa_mistral-7b_deepseek-reasoner.pdf › Routing_SLM_LLMs/Proxy_routing_prediction/to_deepseek-reasoner/commonsense_qa_as_downstream/cali_down_commonsense_qa_mistral-7b_deepseek-reasoner.pdf]

**CommonsenseQA, phi-3.5-mini to DeepSeek-R1**

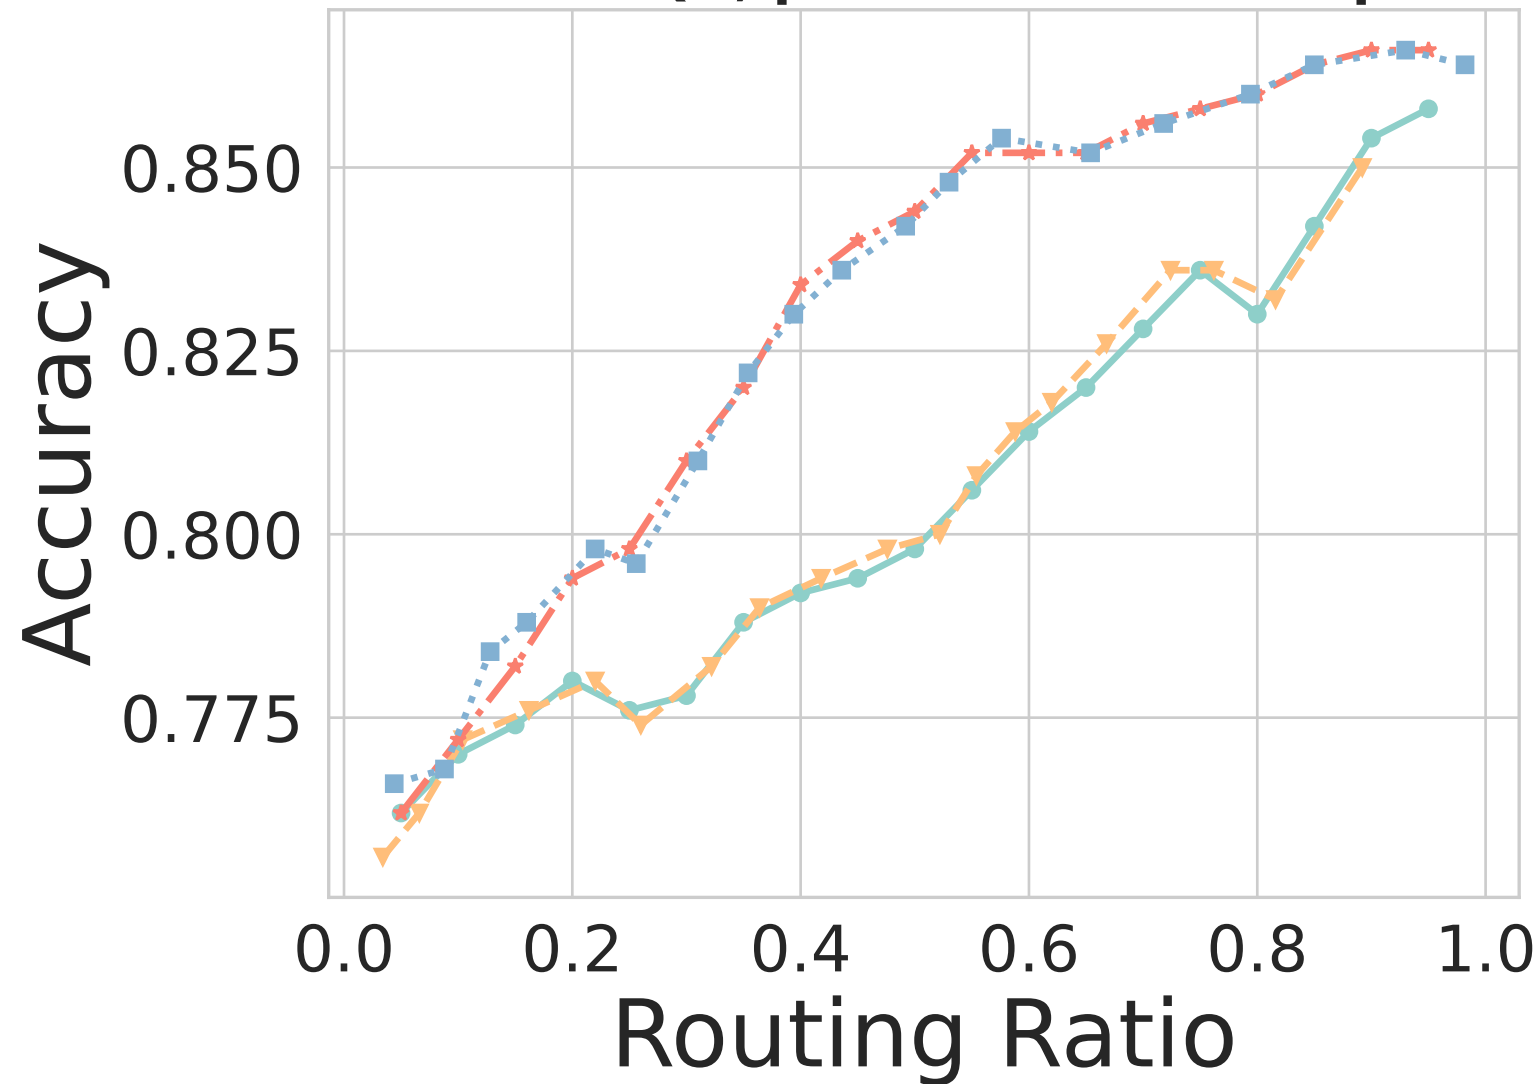

Supplement: supplementary_material [file cali_down_commonsense_qa_phi-3.5-mini_deepseek-reasoner.pdf › Routing_SLM_LLMs/Proxy_routing_prediction/to_deepseek-reasoner/commonsense_qa_as_downstream/cali_down_commonsense_qa_phi-3.5-mini_deepseek-reasoner.pdf]

# CommonsenseQA, phi-4-mini-reasoning to DeepSeek-R1

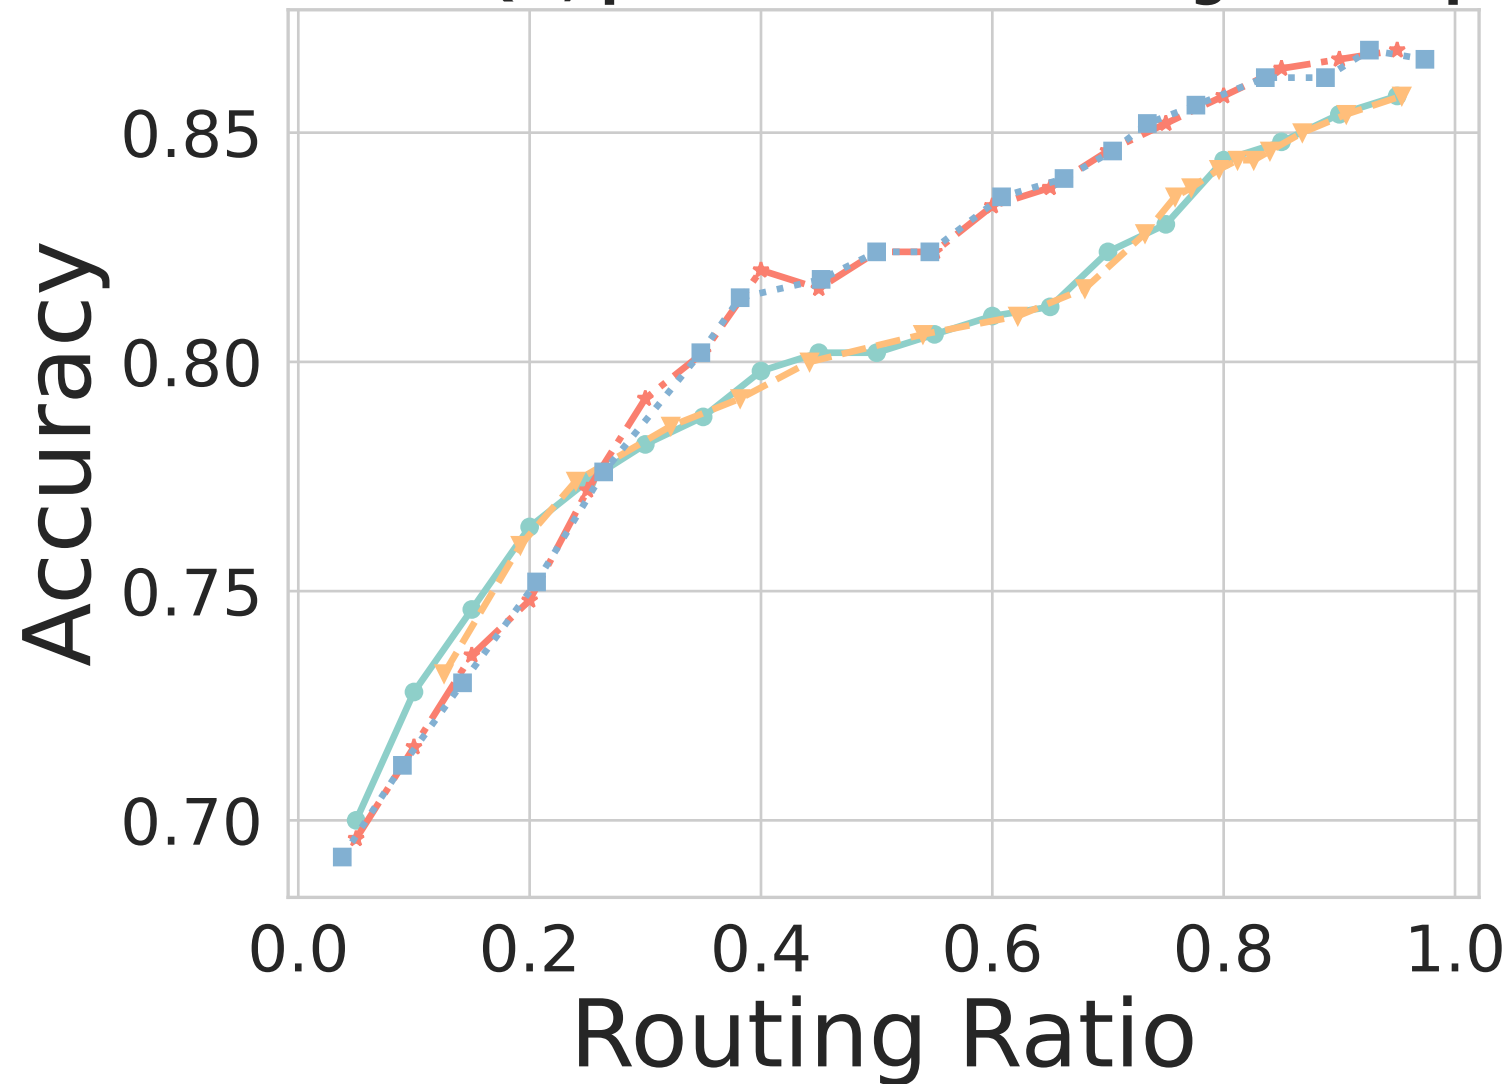

Supplement: supplementary_material [file cali_down_commonsense_qa_phi-4-mini-reasoning_deepseek-reasoner.pdf › Routing_SLM_LLMs/Proxy_routing_prediction/to_deepseek-reasoner/commonsense_qa_as_downstream/cali_down_commonsense_qa_phi-4-mini-reasoning_deepseek-reasoner.pdf]

**CommonsenseQA, qwen-2.5-7b to DeepSeek-R1**

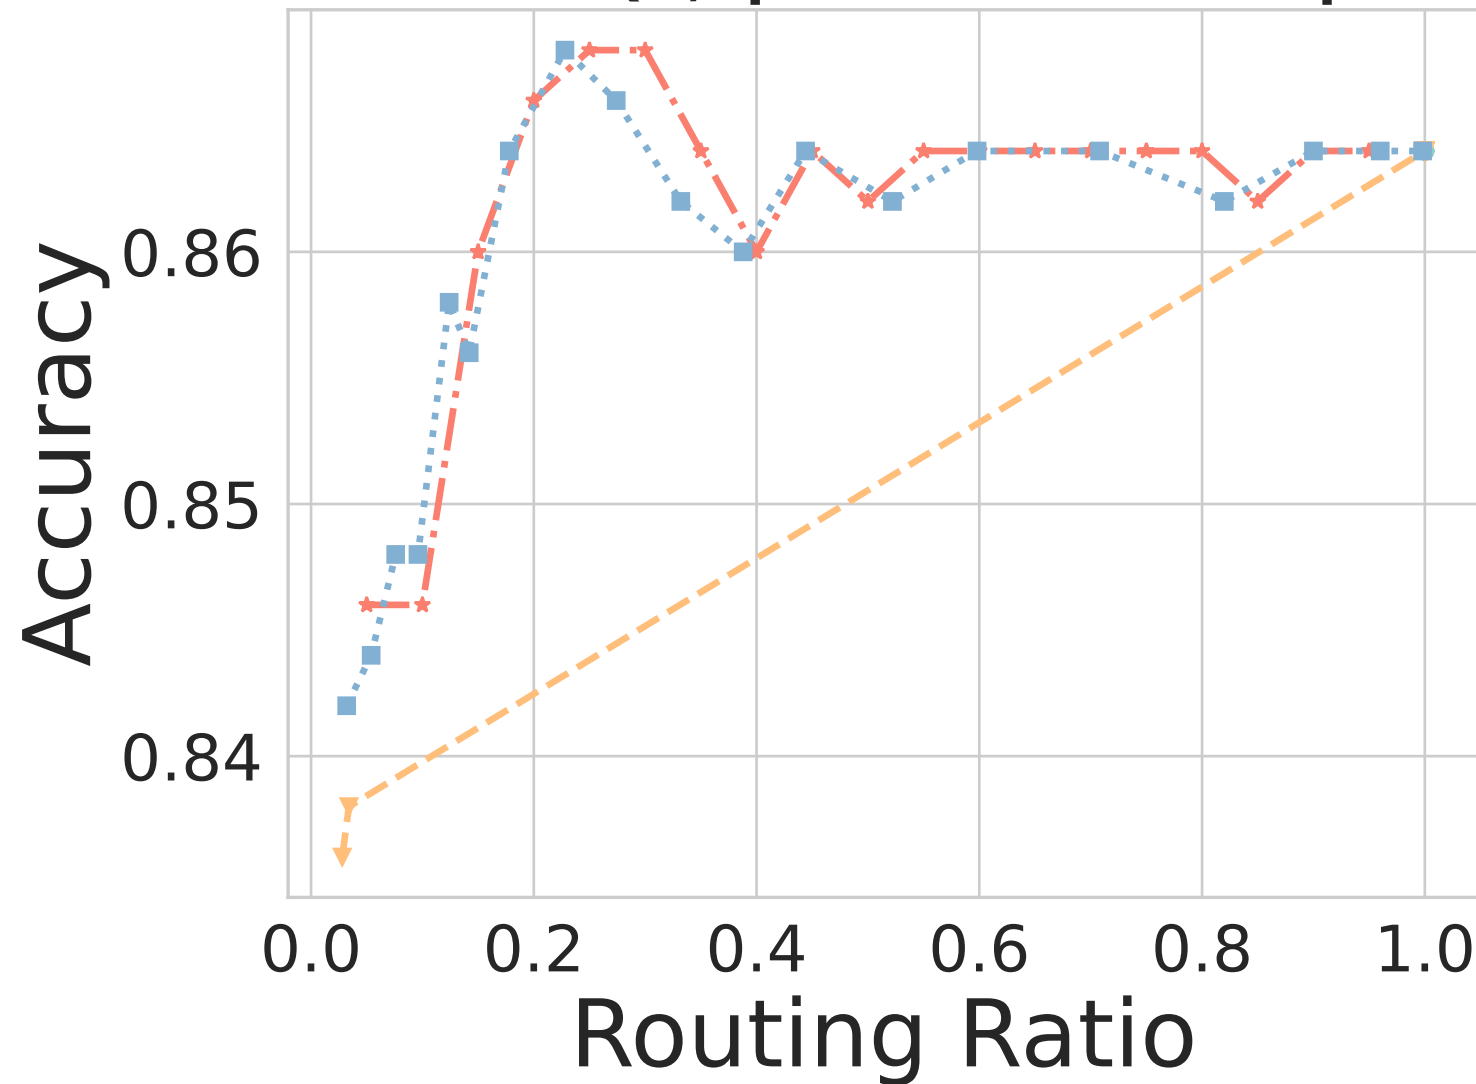

Supplement: supplementary_material [file cali_down_commonsense_qa_qwen-2.5-7b_deepseek-reasoner.pdf › Routing_SLM_LLMs/Proxy_routing_prediction/to_deepseek-reasoner/commonsense_qa_as_downstream/cali_down_commonsense_qa_qwen-2.5-7b_deepseek-reasoner.pdf]

# CommonsenseQA, rwkv to DeepSeek-R1

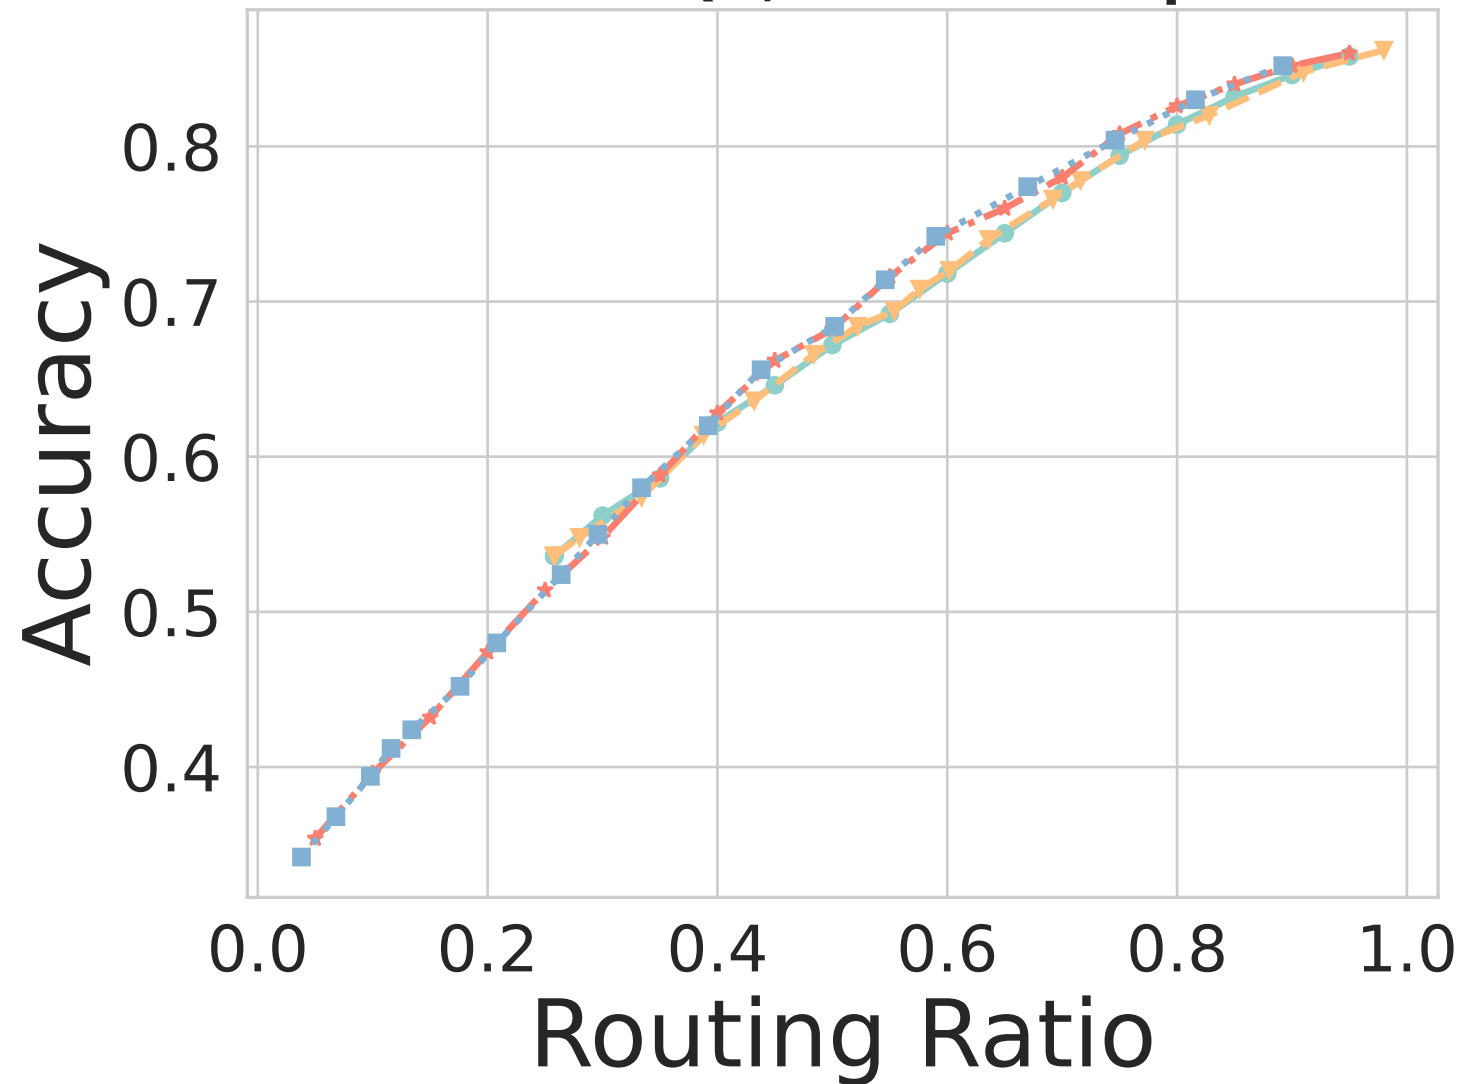

Supplement: supplementary_material [file cali_down_commonsense_qa_rwkv_deepseek-reasoner.pdf › Routing_SLM_LLMs/Proxy_routing_prediction/to_deepseek-reasoner/commonsense_qa_as_downstream/cali_down_commonsense_qa_rwkv_deepseek-reasoner.pdf]

**GSM8K, Qwen3-0.6B to DeepSeek-R1**

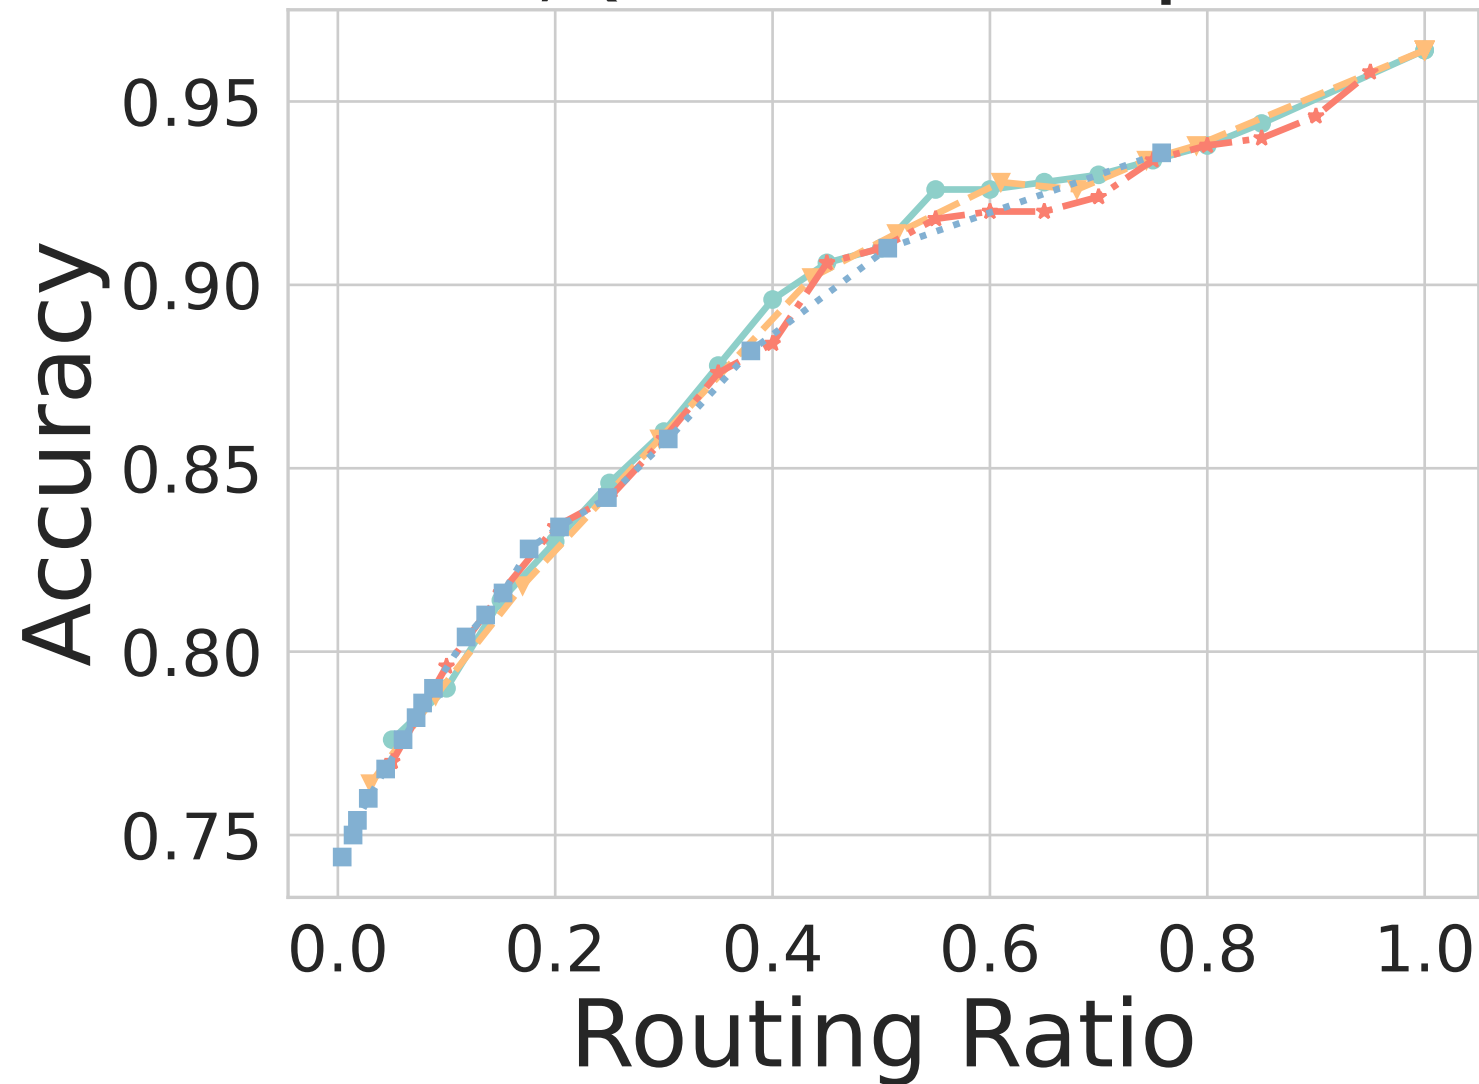

Supplement: supplementary_material [file cali_down_gsm8k_Qwen3-0.6B_deepseek-reasoner.pdf › Routing_SLM_LLMs/Proxy_routing_prediction/to_deepseek-reasoner/gsm8k_as_downstream/cali_down_gsm8k_Qwen3-0.6B_deepseek-reasoner.pdf]

**GSM8K, Qwen3-1.7B to DeepSeek-R1**

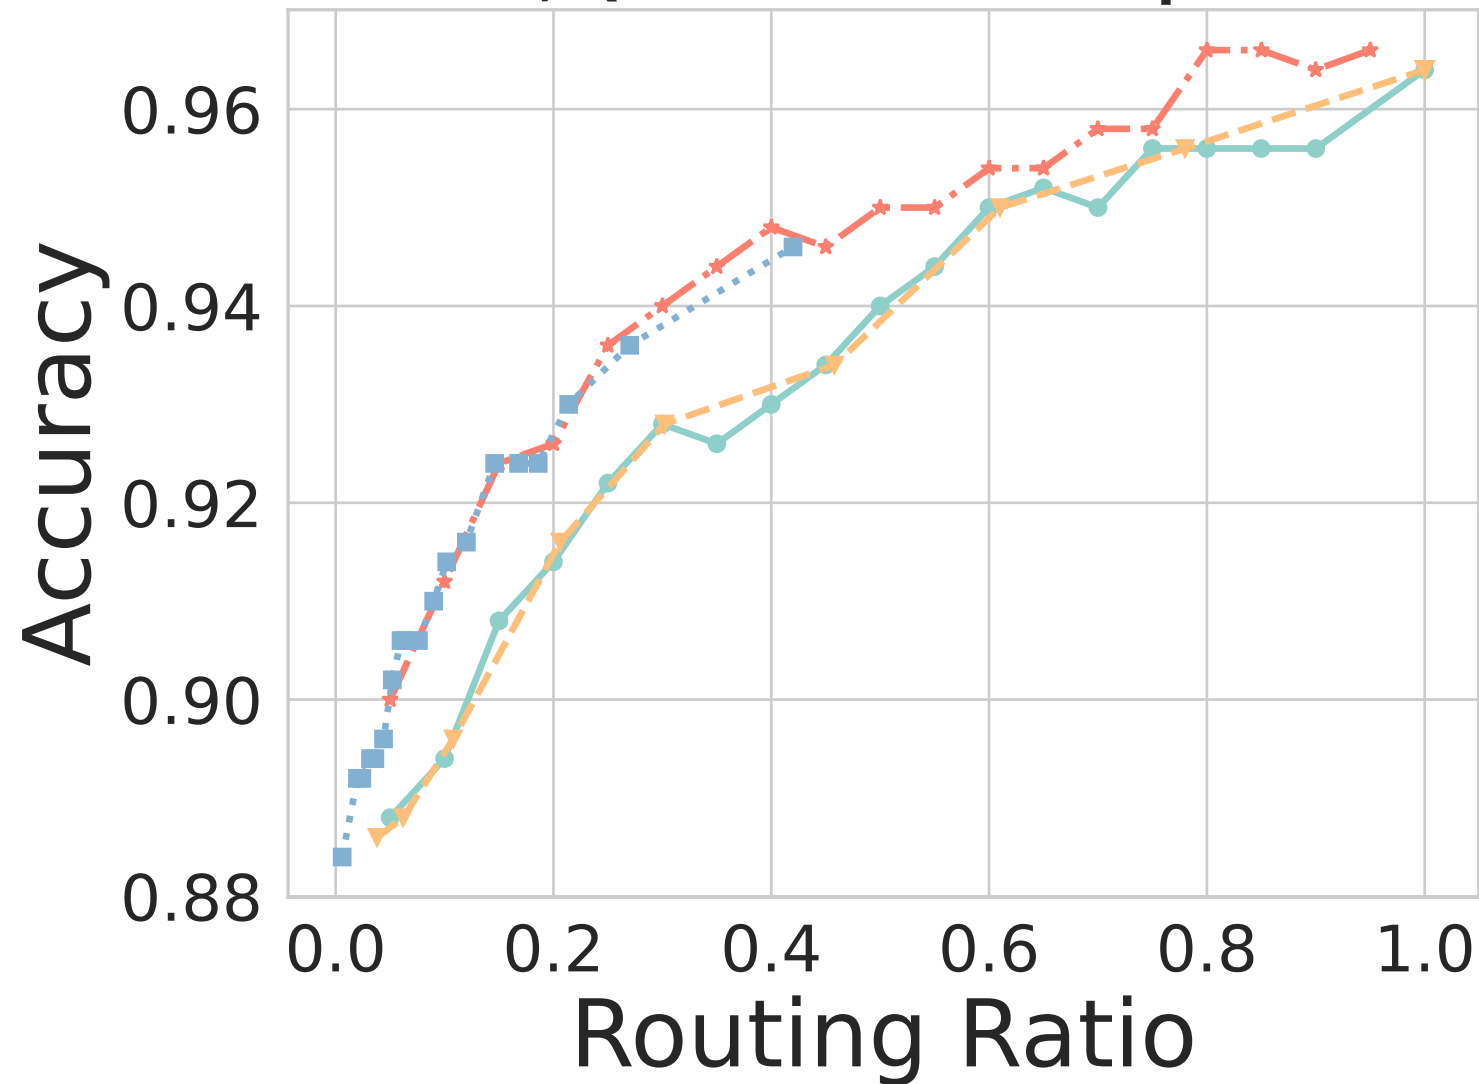

Supplement: supplementary_material [file cali_down_gsm8k_Qwen3-1.7B_deepseek-reasoner.pdf › Routing_SLM_LLMs/Proxy_routing_prediction/to_deepseek-reasoner/gsm8k_as_downstream/cali_down_gsm8k_Qwen3-1.7B_deepseek-reasoner.pdf]

# GSM8K, Qwen3-4B to DeepSeek-R1

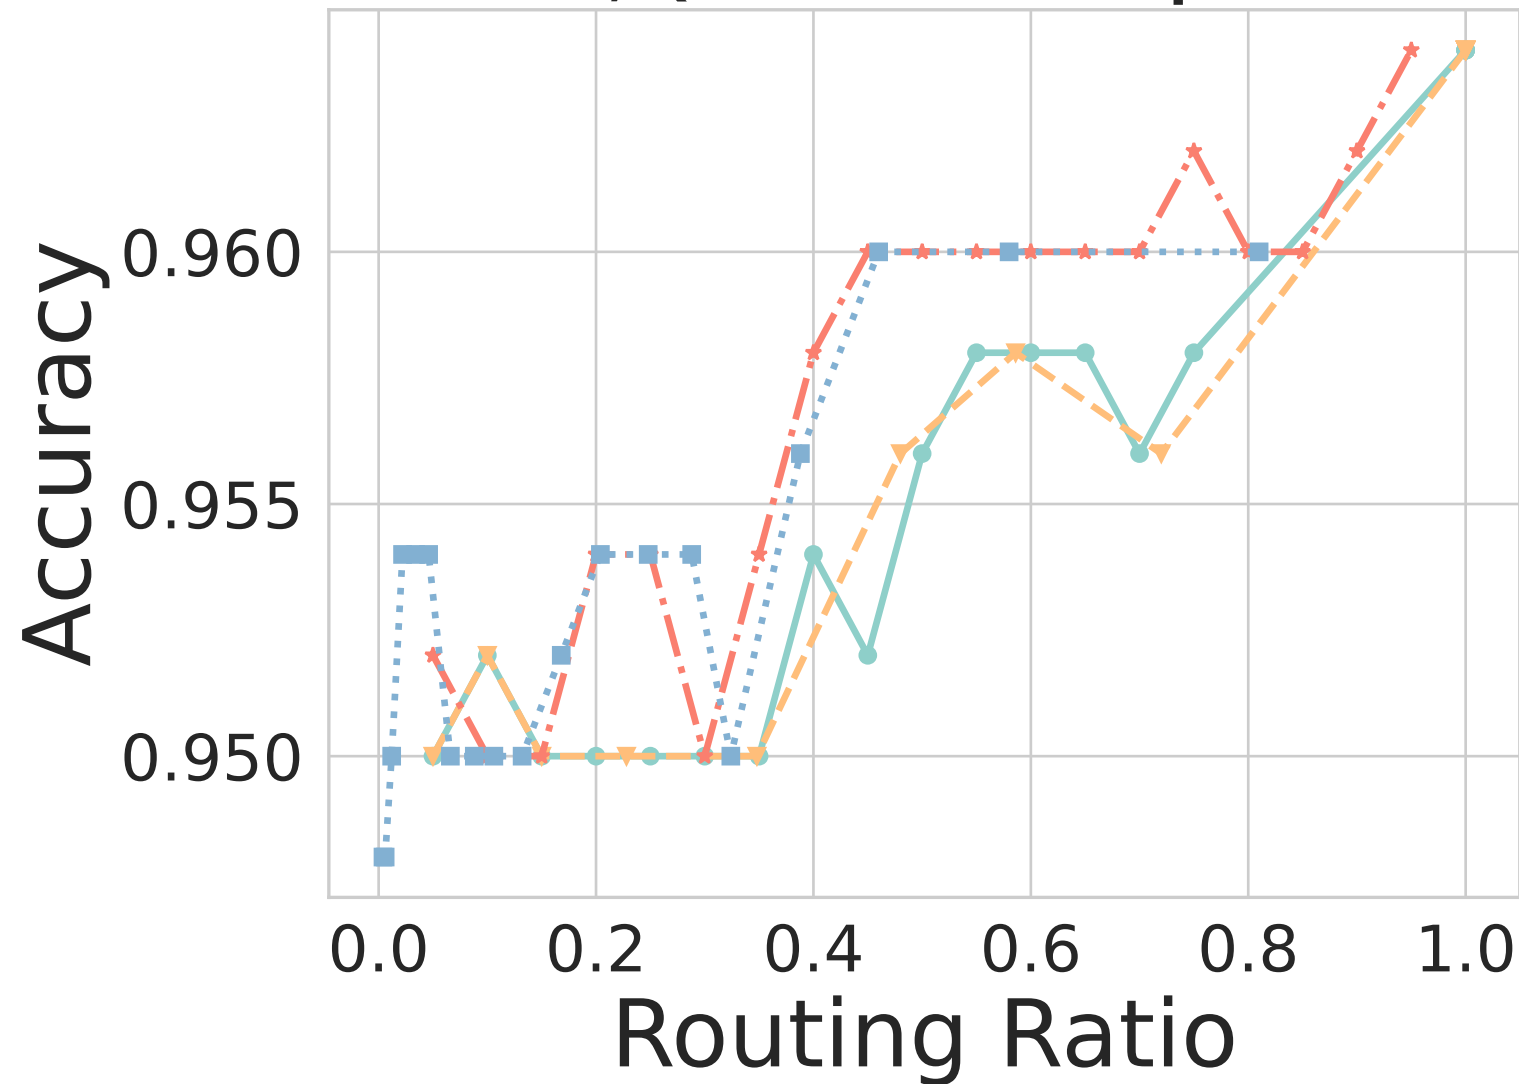

Supplement: supplementary_material [file cali_down_gsm8k_Qwen3-4B_deepseek-reasoner.pdf › Routing_SLM_LLMs/Proxy_routing_prediction/to_deepseek-reasoner/gsm8k_as_downstream/cali_down_gsm8k_Qwen3-4B_deepseek-reasoner.pdf]

**GSM8K, granite-3.1-8b to DeepSeek-R1**

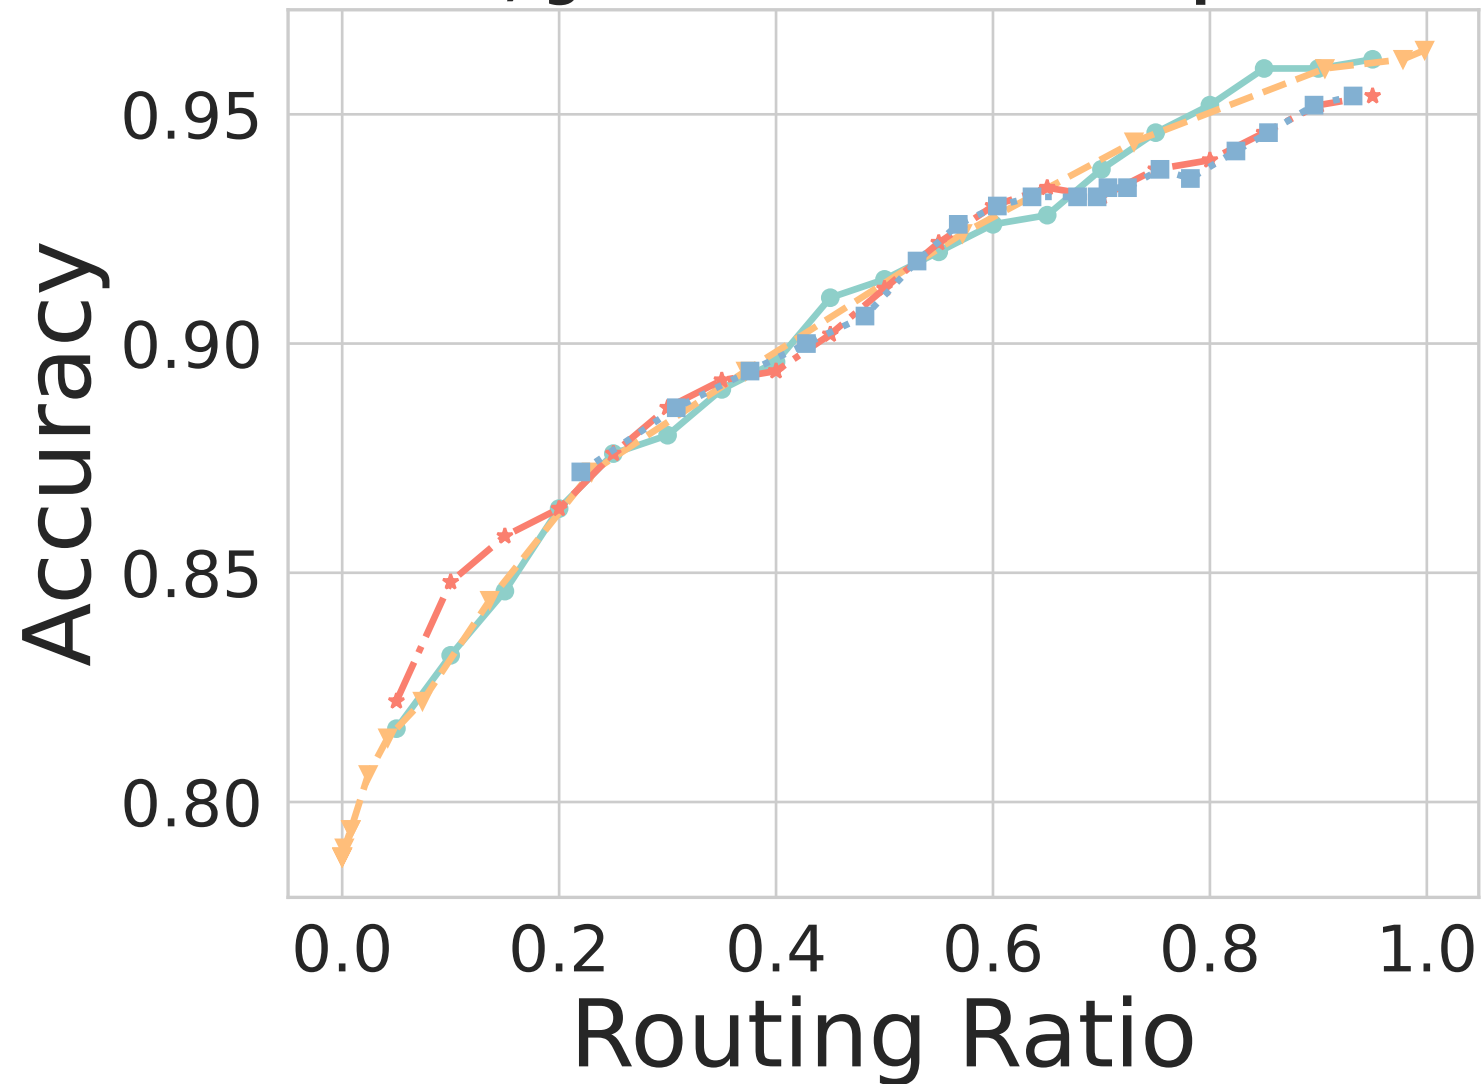

Supplement: supplementary_material [file cali_down_gsm8k_granite-3.1-8b_deepseek-reasoner.pdf › Routing_SLM_LLMs/Proxy_routing_prediction/to_deepseek-reasoner/gsm8k_as_downstream/cali_down_gsm8k_granite-3.1-8b_deepseek-reasoner.pdf]

**GSM8K, llama-3.1-8b to DeepSeek-R1**

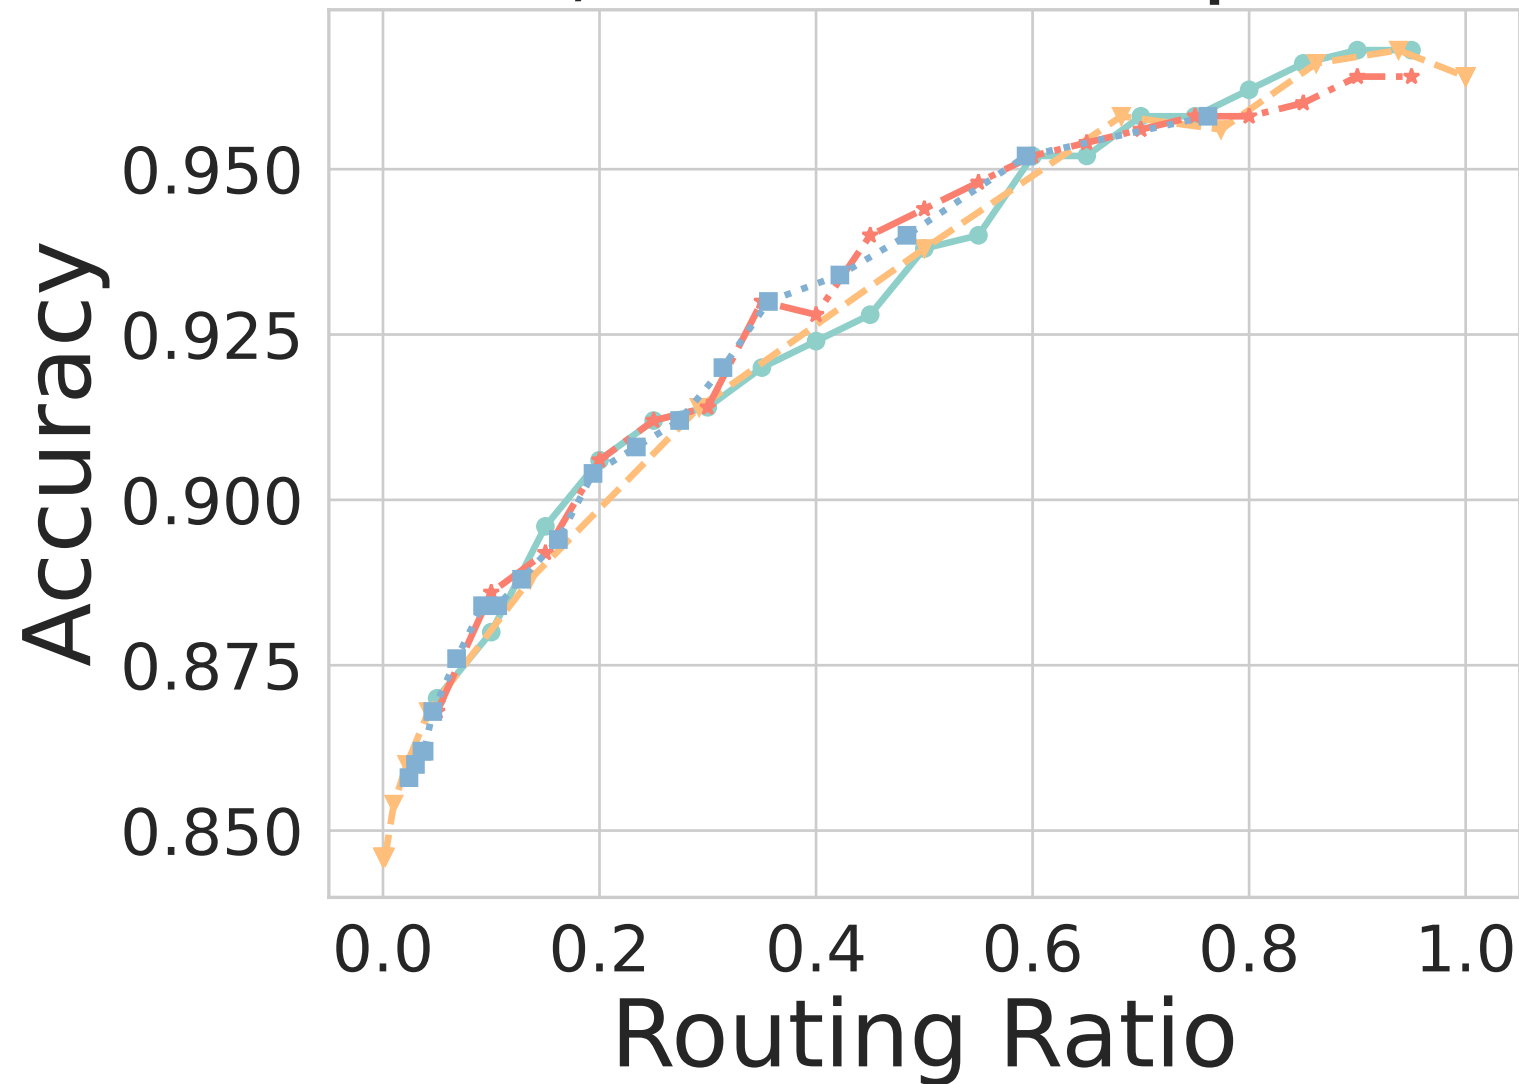

Supplement: supplementary_material [file cali_down_gsm8k_llama-3.1-8b_deepseek-reasoner.pdf › Routing_SLM_LLMs/Proxy_routing_prediction/to_deepseek-reasoner/gsm8k_as_downstream/cali_down_gsm8k_llama-3.1-8b_deepseek-reasoner.pdf]

**GSM8K, llama-3.2-1b to DeepSeek-R1**

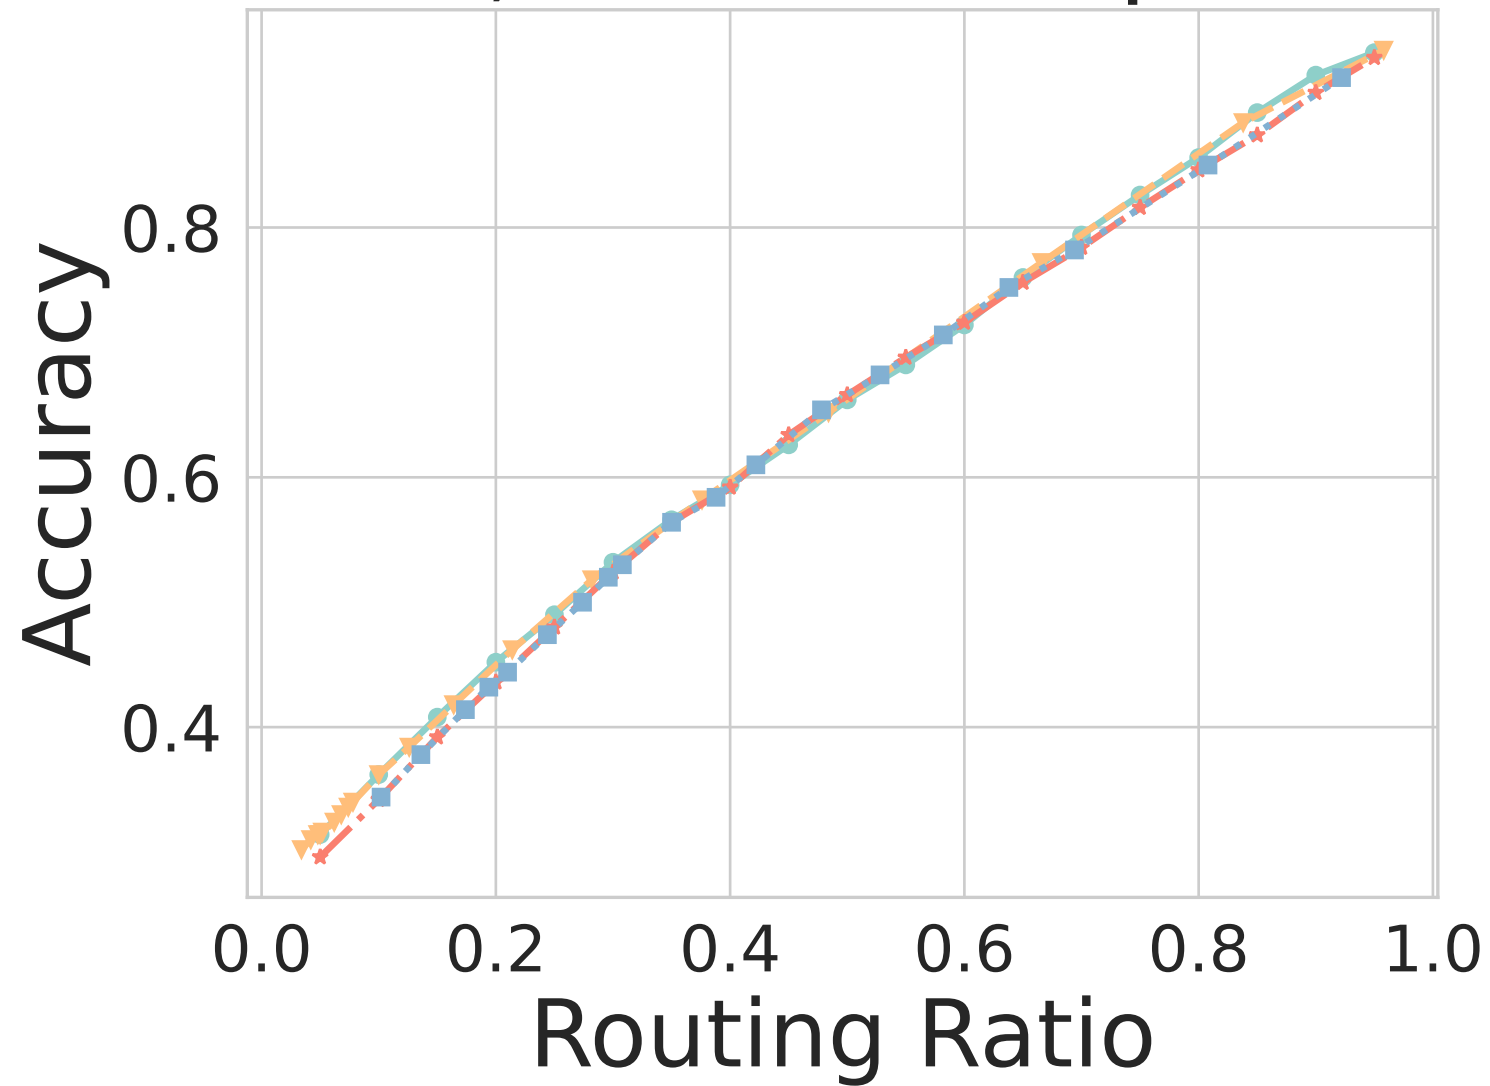

Supplement: supplementary_material [file cali_down_gsm8k_llama-3.2-1b_deepseek-reasoner.pdf › Routing_SLM_LLMs/Proxy_routing_prediction/to_deepseek-reasoner/gsm8k_as_downstream/cali_down_gsm8k_llama-3.2-1b_deepseek-reasoner.pdf]

**GSM8K, llama-3.2-3b to DeepSeek-R1**

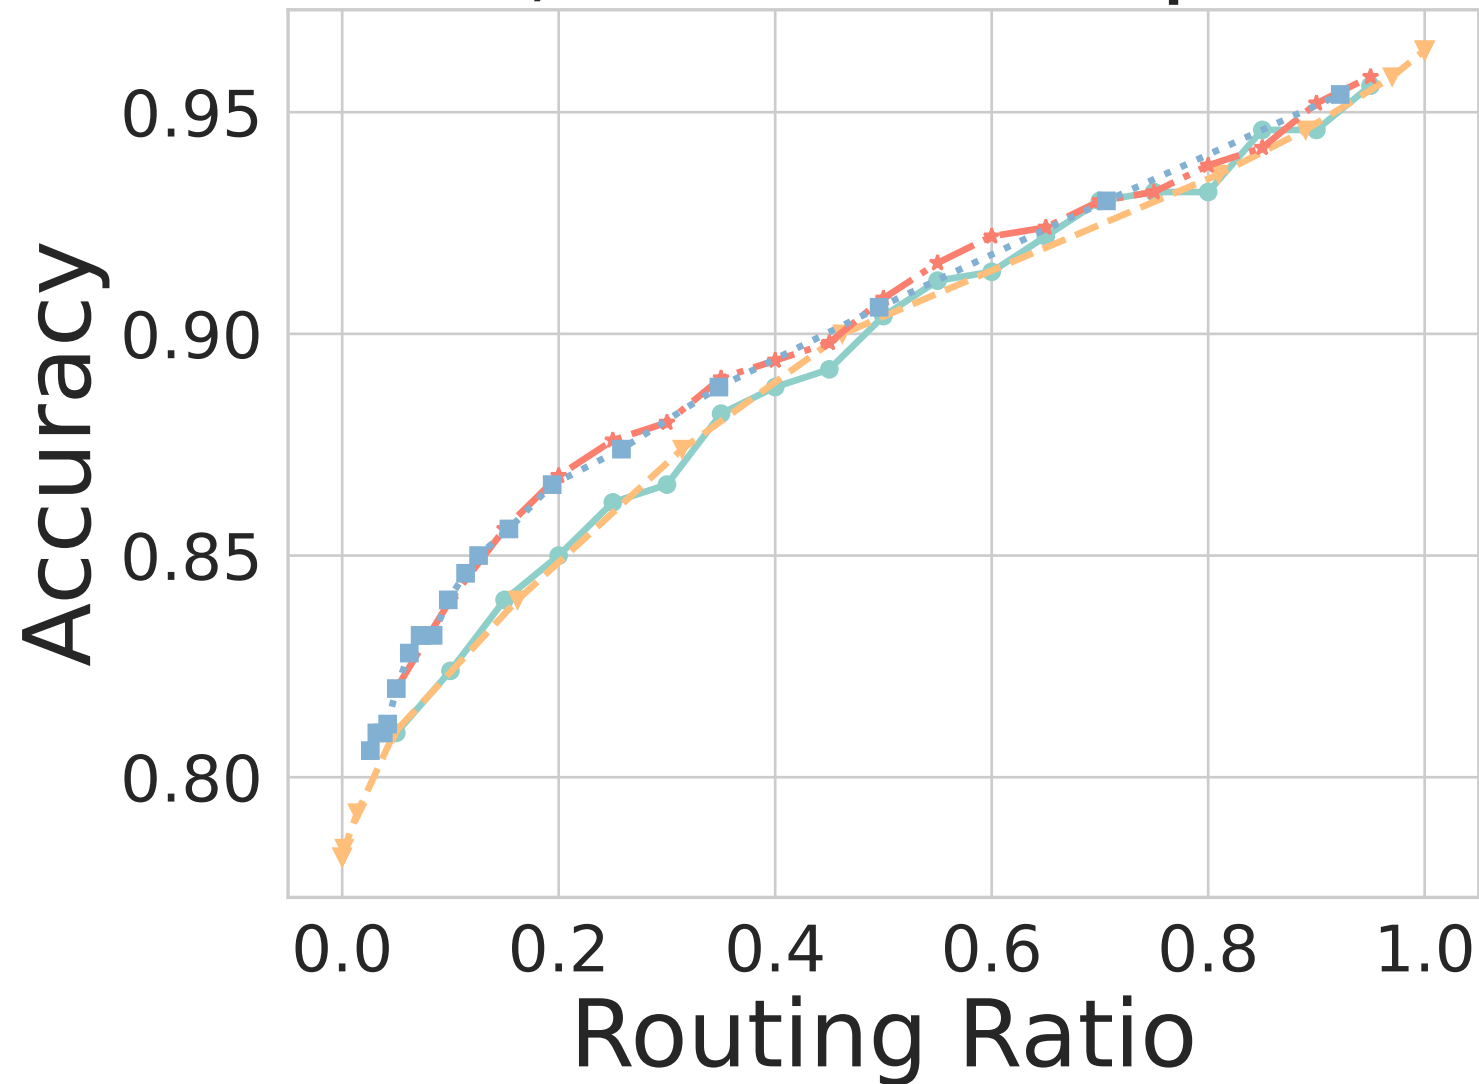

Supplement: supplementary_material [file cali_down_gsm8k_llama-3.2-3b_deepseek-reasoner.pdf › Routing_SLM_LLMs/Proxy_routing_prediction/to_deepseek-reasoner/gsm8k_as_downstream/cali_down_gsm8k_llama-3.2-3b_deepseek-reasoner.pdf]

**GSM8K, mistral-7b to DeepSeek-R1**

Accuracy

1.0  
0.8  
0.6  
0.4  
0.2

0.0

0.2

0.4

0.6

0.8

1.0

Routing Ratio

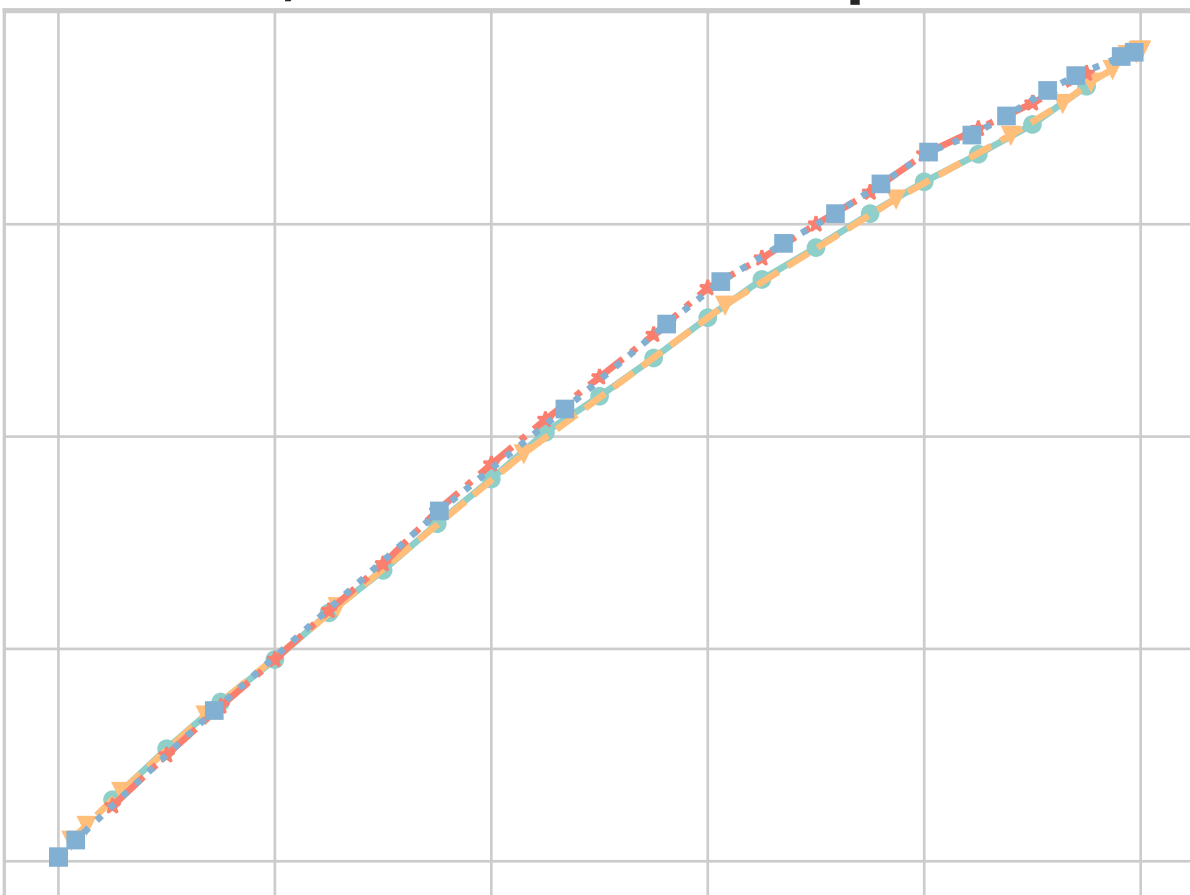

Supplement: supplementary_material [file cali_down_gsm8k_mistral-7b_deepseek-reasoner.pdf › Routing_SLM_LLMs/Proxy_routing_prediction/to_deepseek-reasoner/gsm8k_as_downstream/cali_down_gsm8k_mistral-7b_deepseek-reasoner.pdf]

**GSM8K, phi-3.5-mini to DeepSeek-R1**

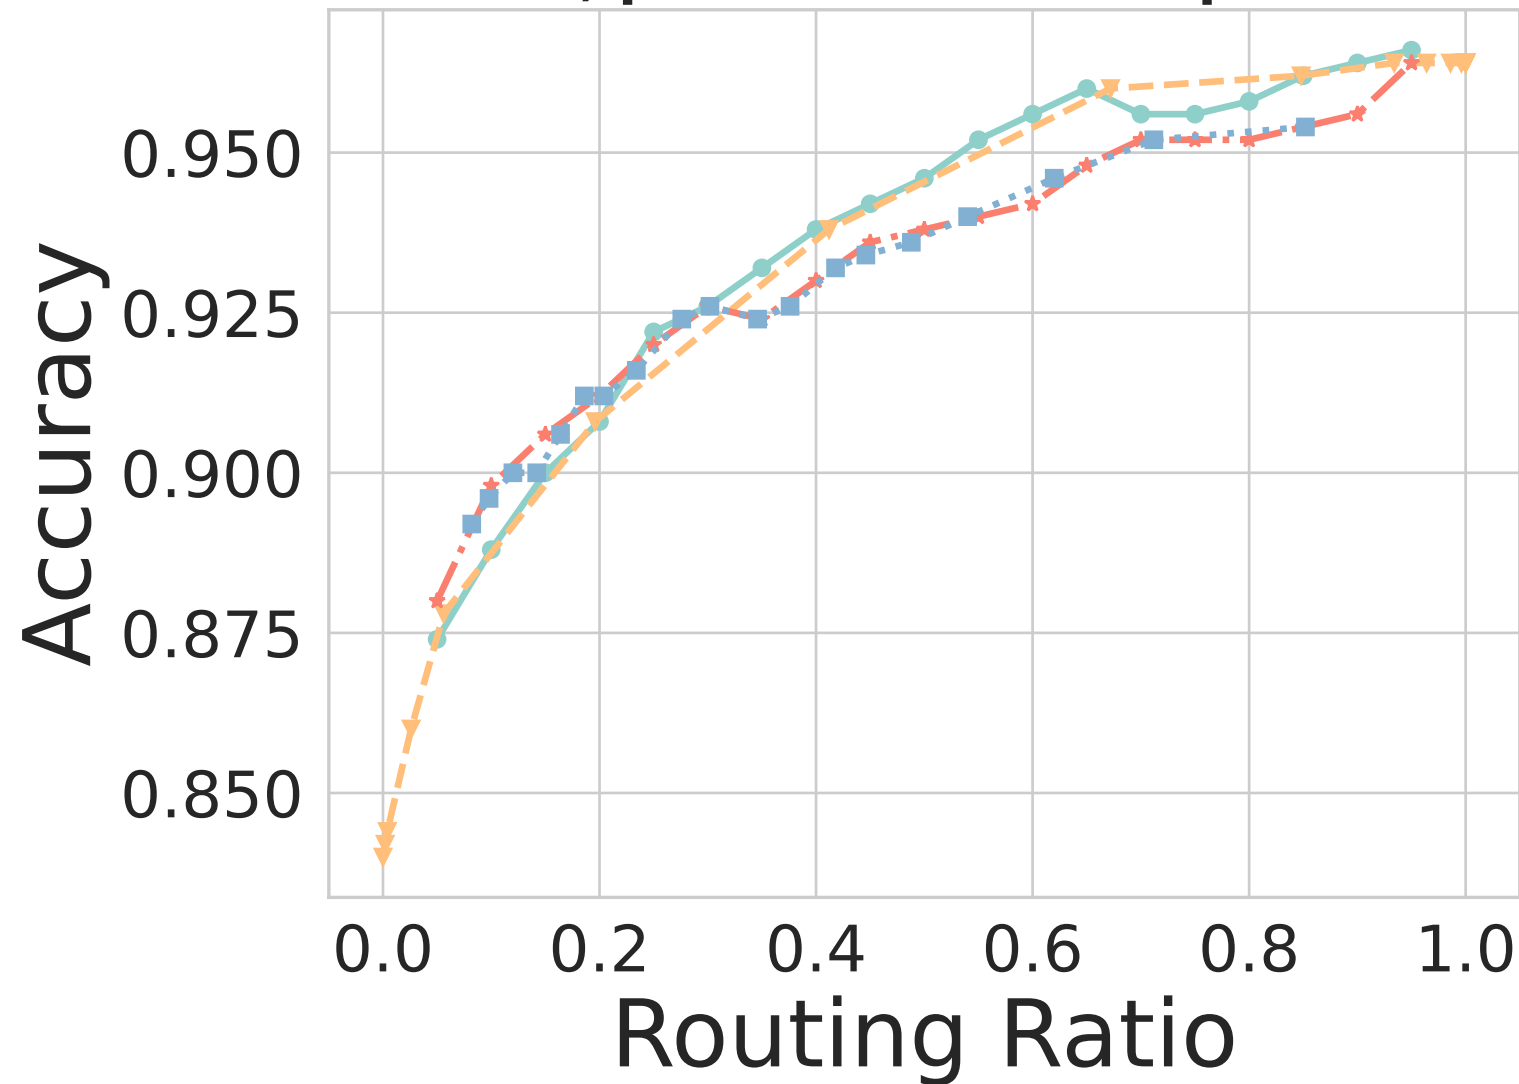

Supplement: supplementary_material [file cali_down_gsm8k_phi-3.5-mini_deepseek-reasoner.pdf › Routing_SLM_LLMs/Proxy_routing_prediction/to_deepseek-reasoner/gsm8k_as_downstream/cali_down_gsm8k_phi-3.5-mini_deepseek-reasoner.pdf]

# GSM8K, phi-4-mini-reasoning to DeepSeek-R1

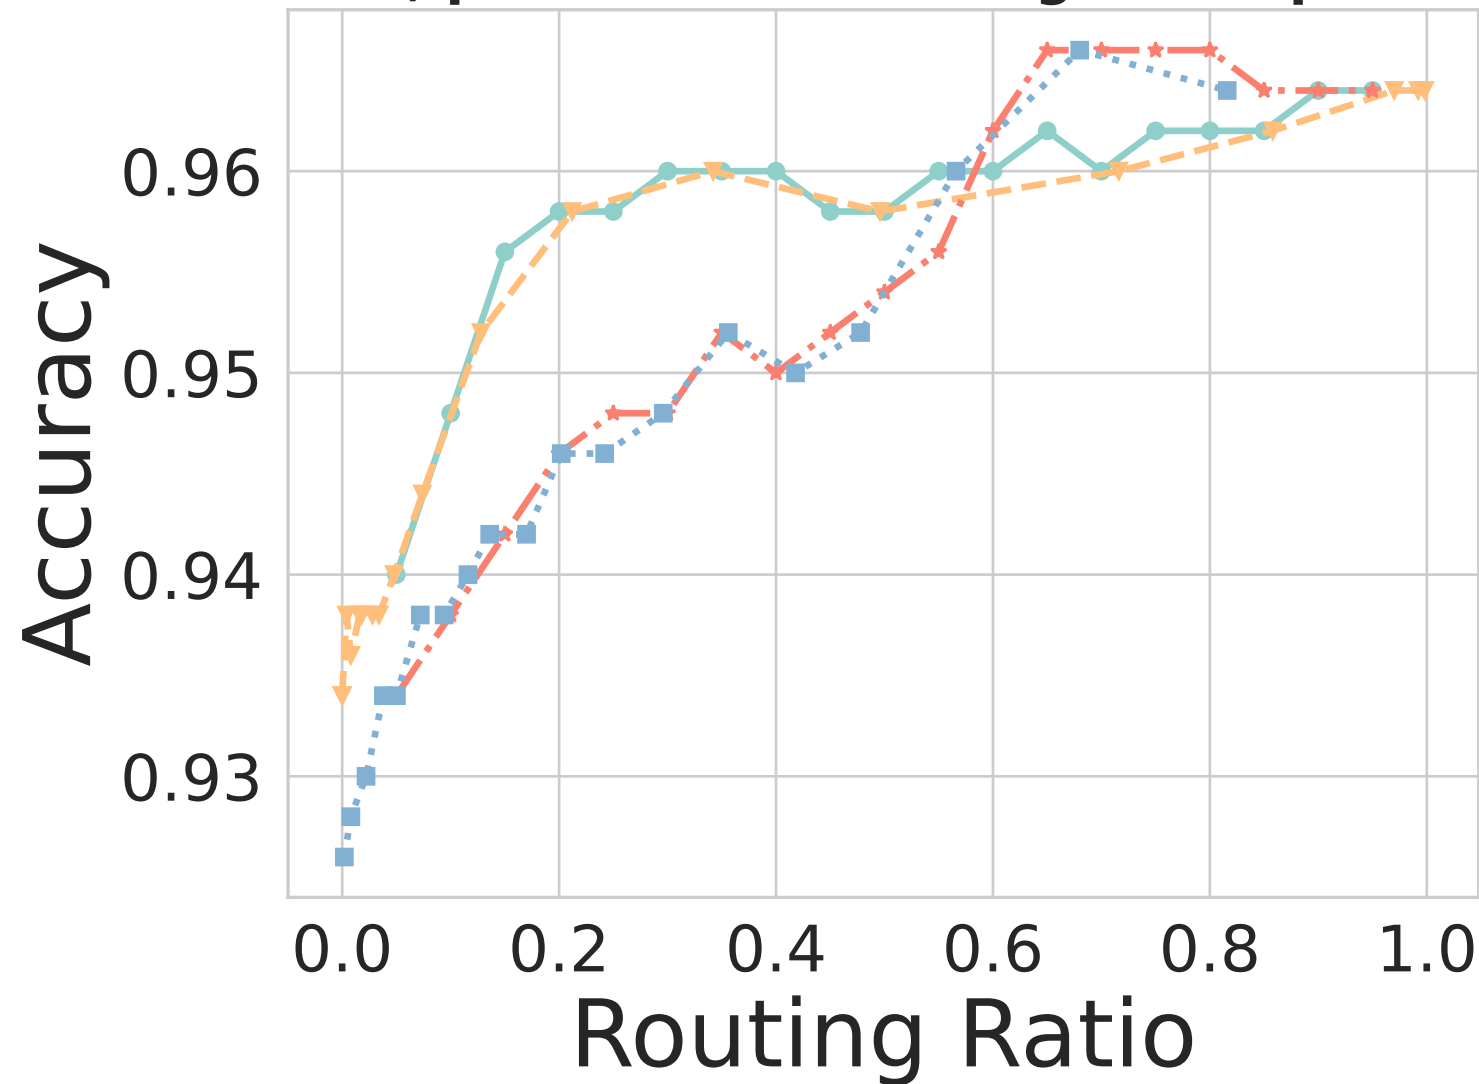

Supplement: supplementary_material [file cali_down_gsm8k_phi-4-mini-reasoning_deepseek-reasoner.pdf › Routing_SLM_LLMs/Proxy_routing_prediction/to_deepseek-reasoner/gsm8k_as_downstream/cali_down_gsm8k_phi-4-mini-reasoning_deepseek-reasoner.pdf]

**GSM8K, qwen-2.5-7b to DeepSeek-R1**

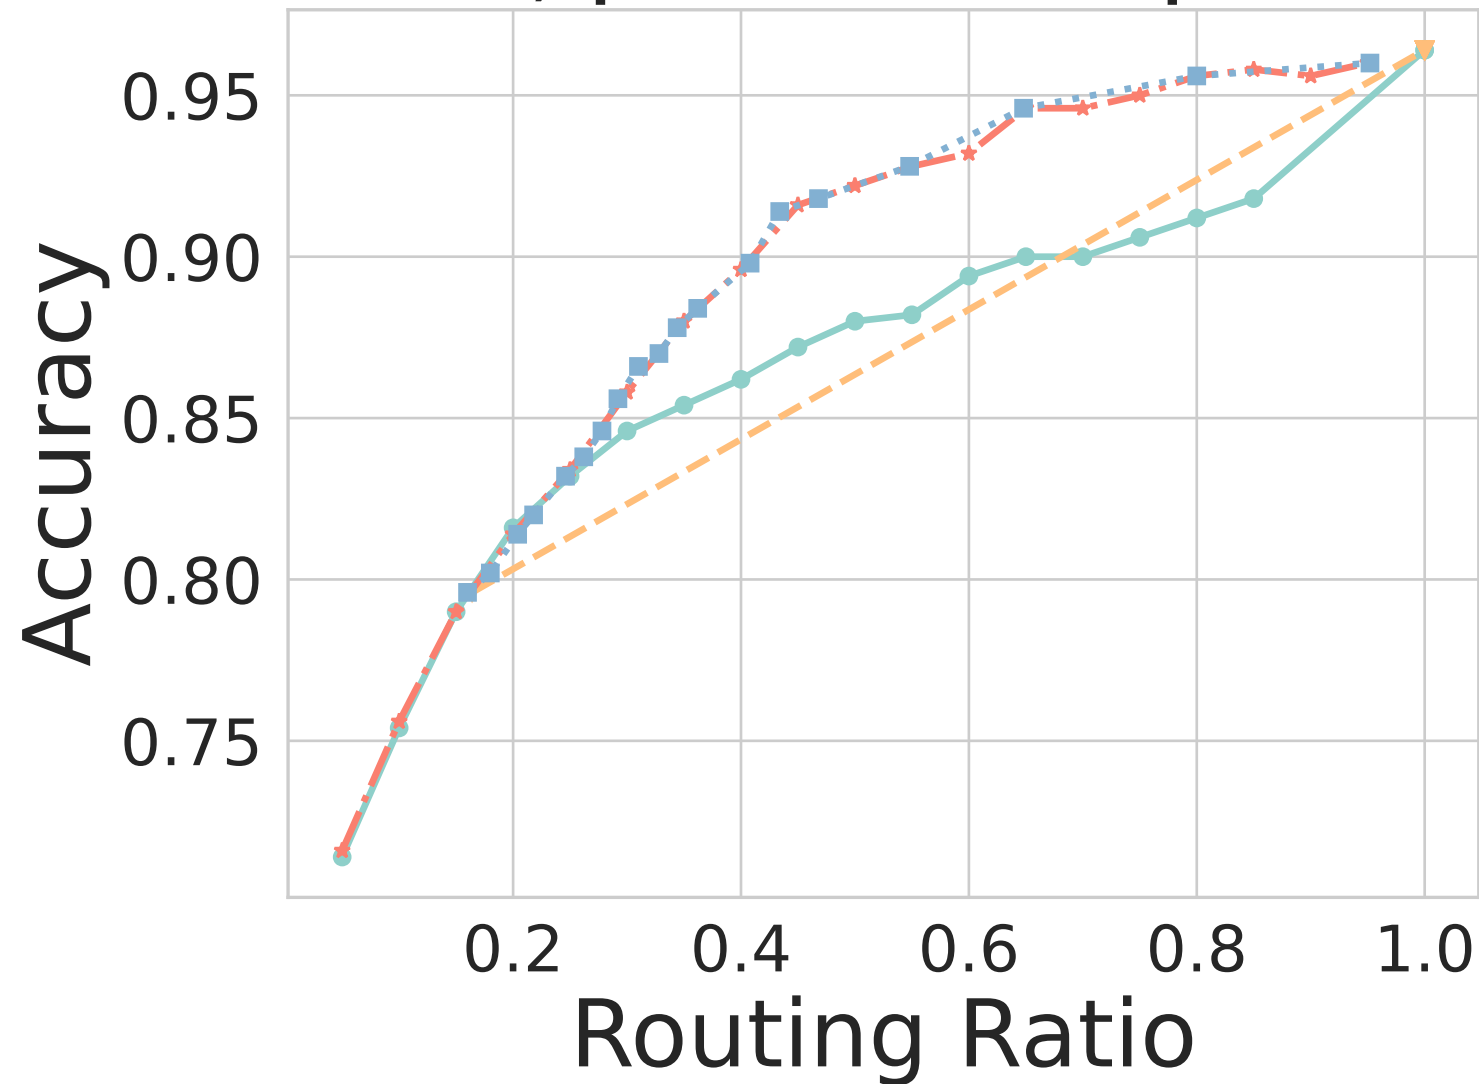

Supplement: supplementary_material [file cali_down_gsm8k_qwen-2.5-7b_deepseek-reasoner.pdf › Routing_SLM_LLMs/Proxy_routing_prediction/to_deepseek-reasoner/gsm8k_as_downstream/cali_down_gsm8k_qwen-2.5-7b_deepseek-reasoner.pdf]

**GSM8K, rwkv to DeepSeek-R1**

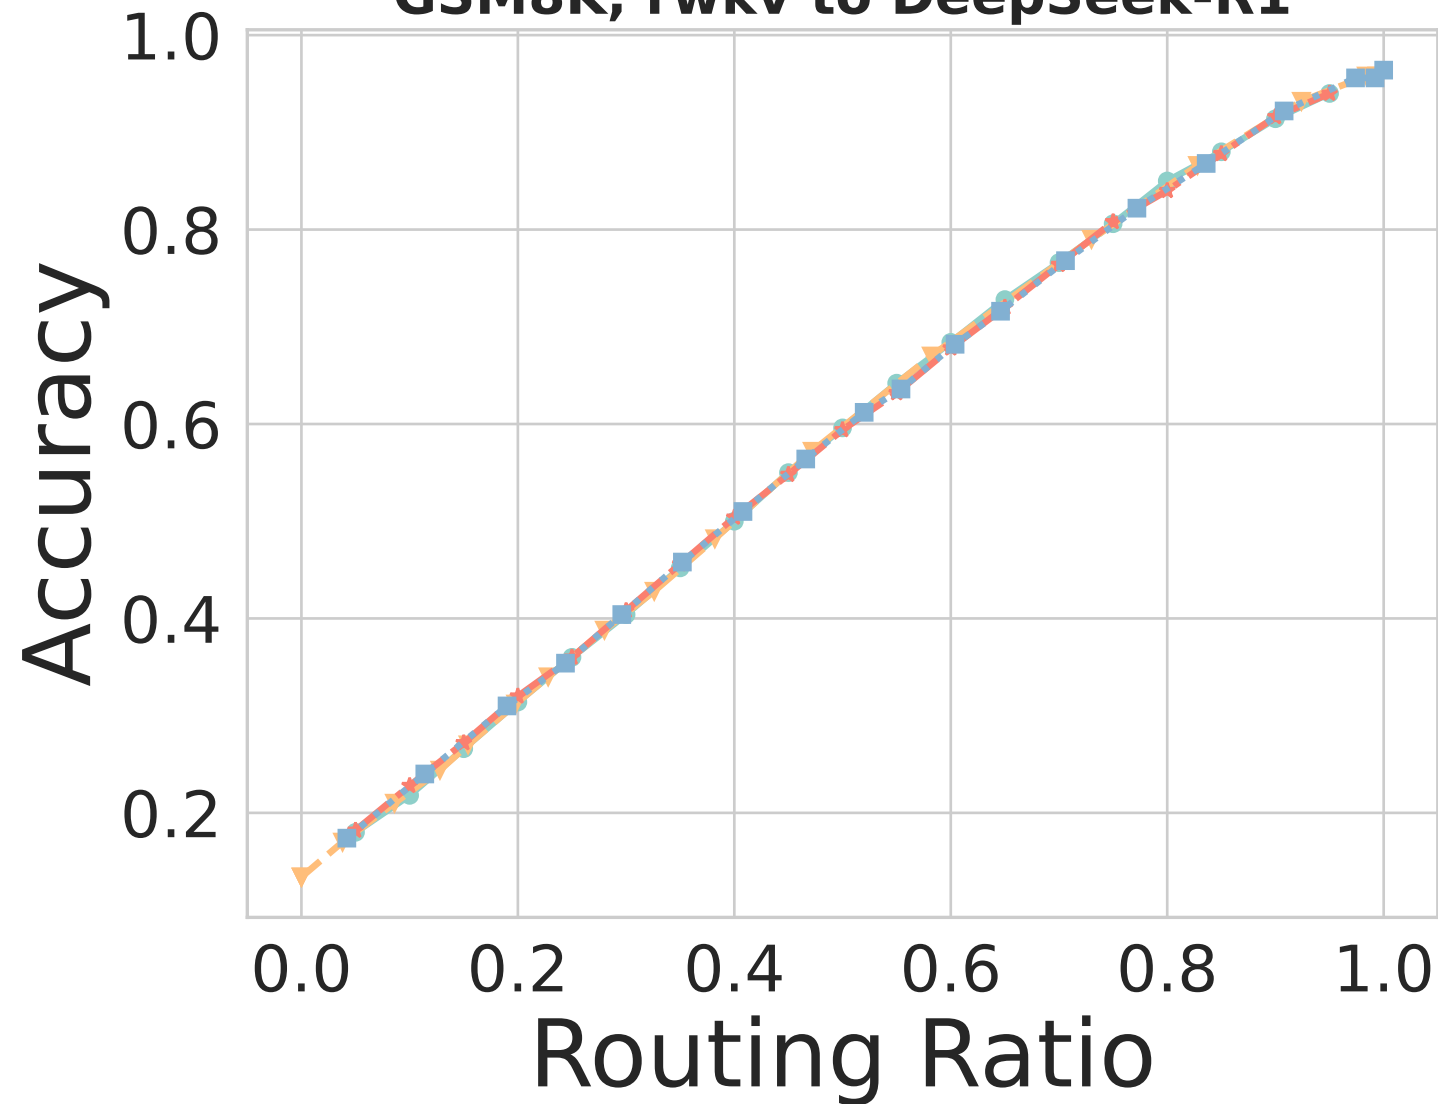

Supplement: supplementary_material [file cali_down_gsm8k_rwkv_deepseek-reasoner.pdf › Routing_SLM_LLMs/Proxy_routing_prediction/to_deepseek-reasoner/gsm8k_as_downstream/cali_down_gsm8k_rwkv_deepseek-reasoner.pdf]

**HellaSwag, Qwen3-0.6B to DeepSeek-R1**

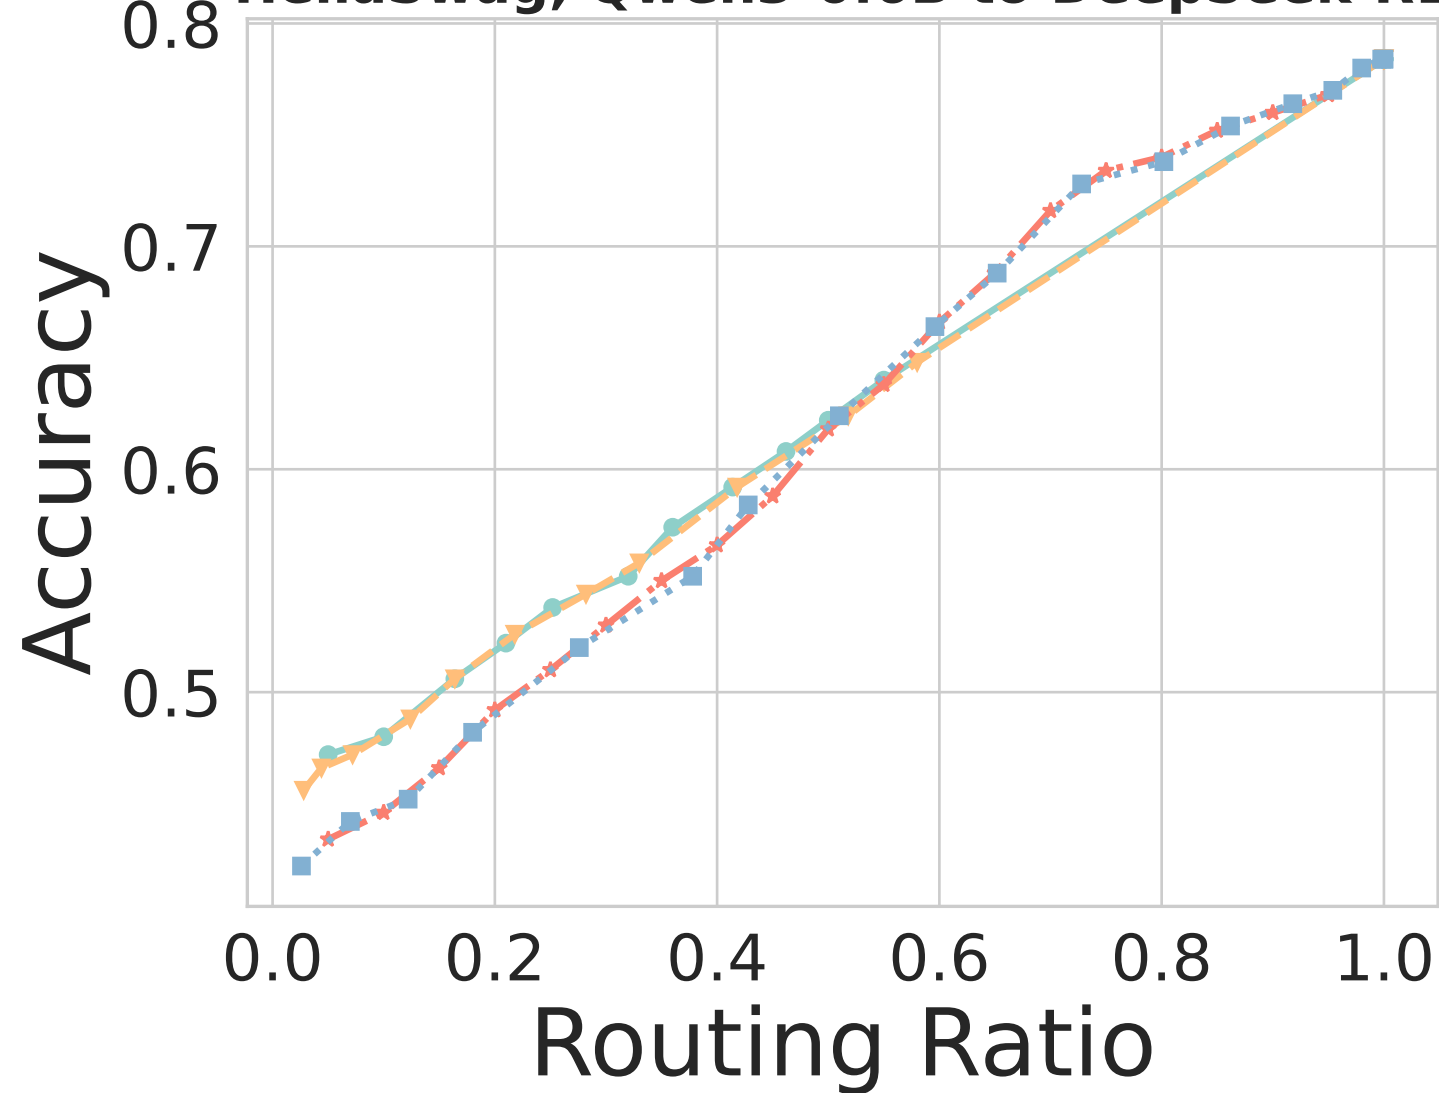

Supplement: supplementary_material [file cali_down_hellaswag_Qwen3-0.6B_deepseek-reasoner.pdf › Routing_SLM_LLMs/Proxy_routing_prediction/to_deepseek-reasoner/hellaswag_as_downstream/cali_down_hellaswag_Qwen3-0.6B_deepseek-reasoner.pdf]

**HellaSwag, Qwen3-1.7B to DeepSeek-R1**

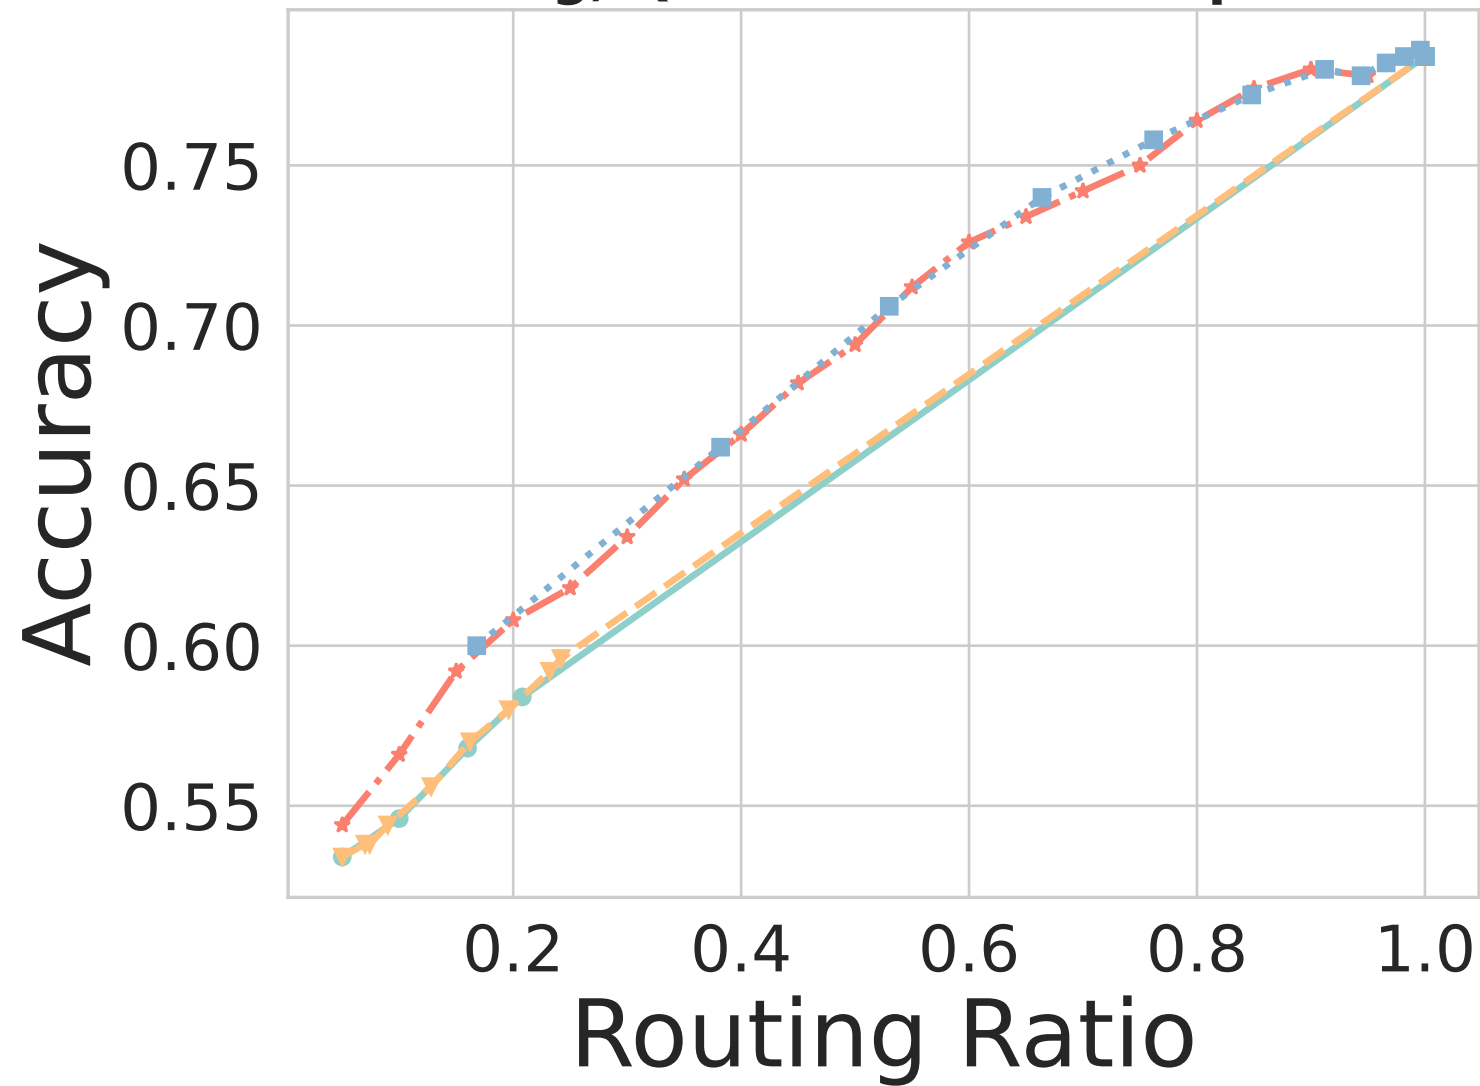

Supplement: supplementary_material [file cali_down_hellaswag_Qwen3-1.7B_deepseek-reasoner.pdf › Routing_SLM_LLMs/Proxy_routing_prediction/to_deepseek-reasoner/hellaswag_as_downstream/cali_down_hellaswag_Qwen3-1.7B_deepseek-reasoner.pdf]

**HellaSwag, Qwen3-4B to DeepSeek-R1**

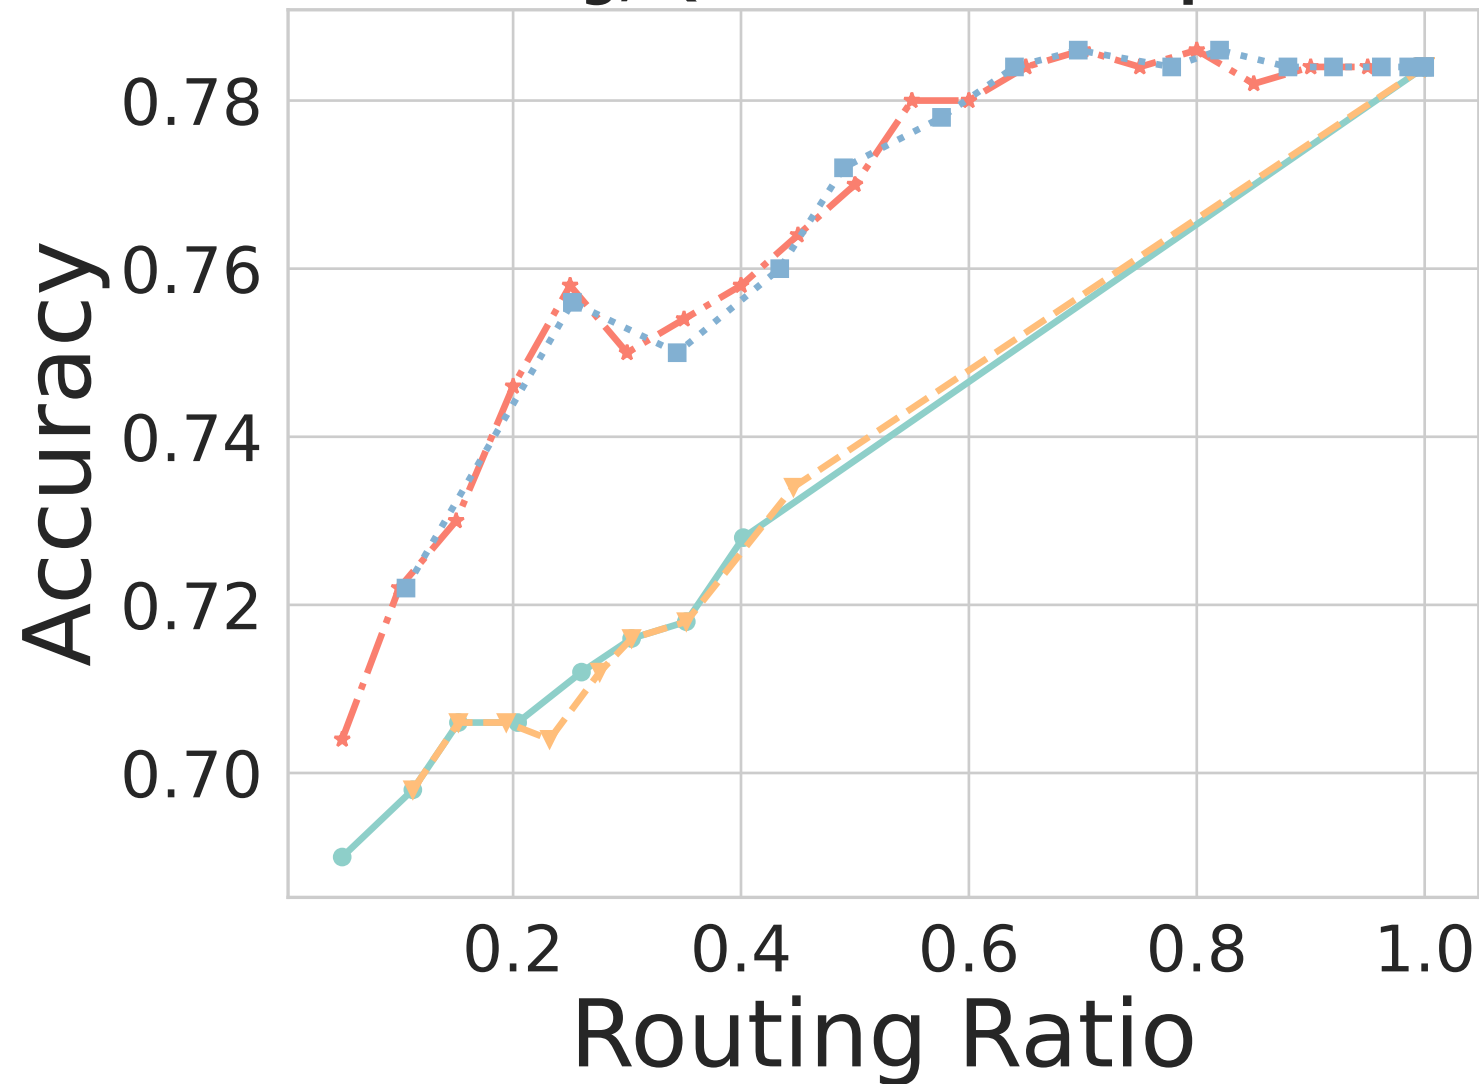

Supplement: supplementary_material [file cali_down_hellaswag_Qwen3-4B_deepseek-reasoner.pdf › Routing_SLM_LLMs/Proxy_routing_prediction/to_deepseek-reasoner/hellaswag_as_downstream/cali_down_hellaswag_Qwen3-4B_deepseek-reasoner.pdf]

**HellaSwag, granite-3.1-8b to DeepSeek-R1**

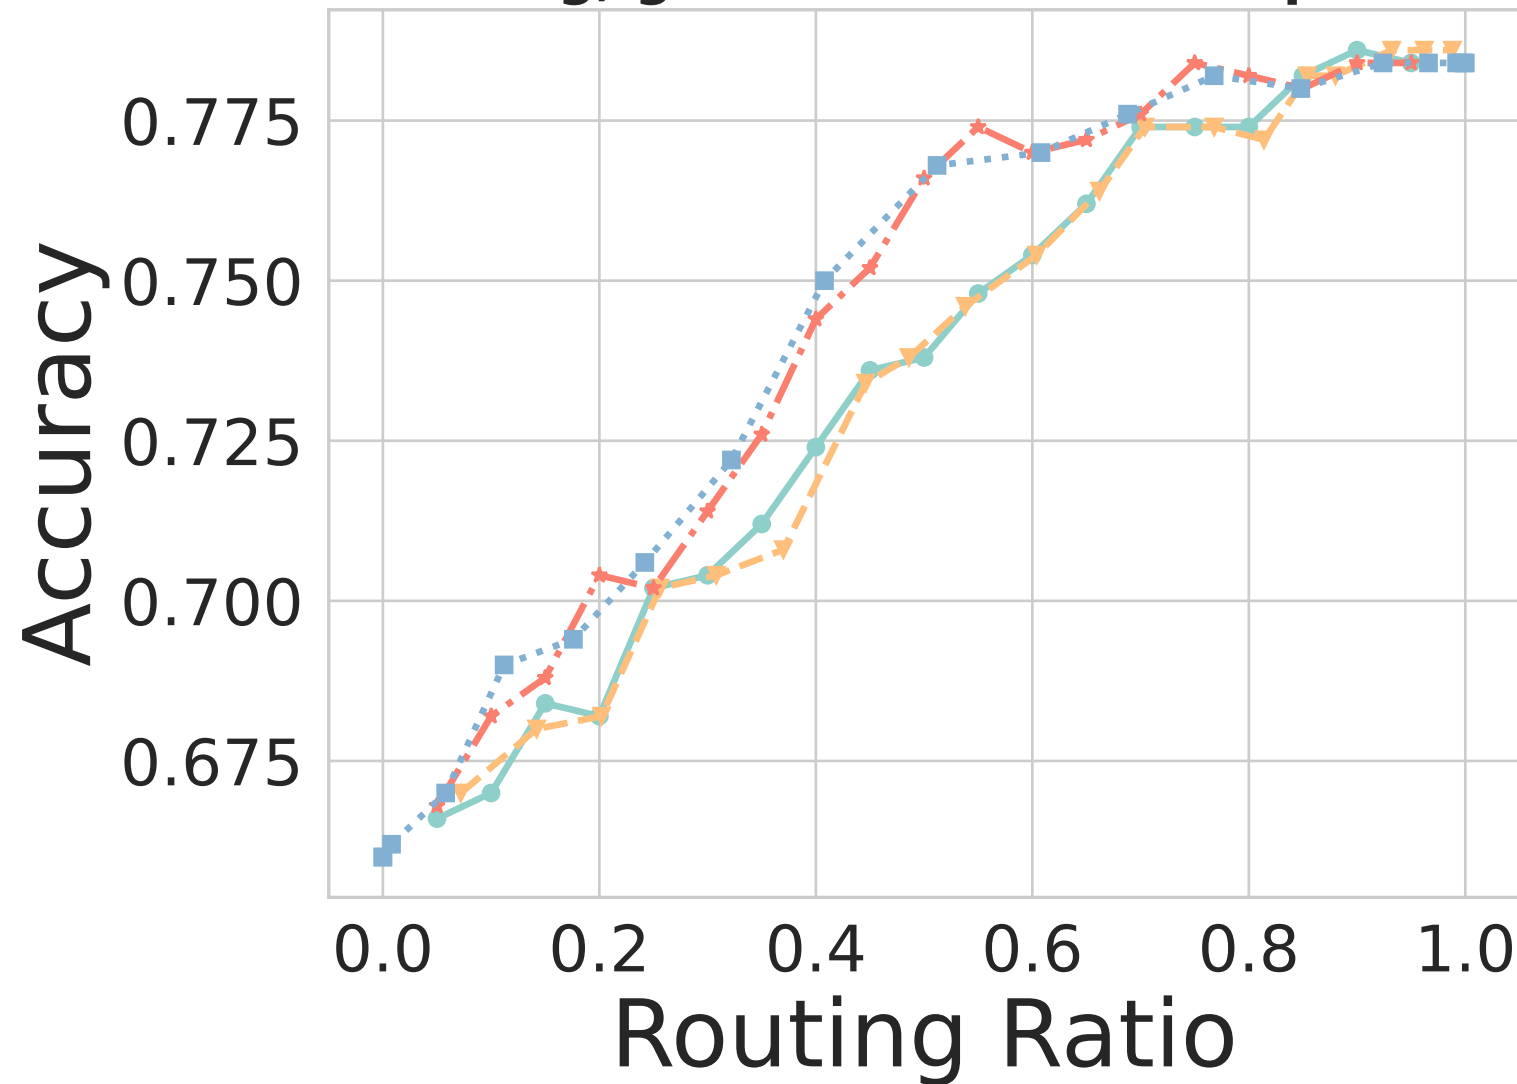

Supplement: supplementary_material [file cali_down_hellaswag_granite-3.1-8b_deepseek-reasoner.pdf › Routing_SLM_LLMs/Proxy_routing_prediction/to_deepseek-reasoner/hellaswag_as_downstream/cali_down_hellaswag_granite-3.1-8b_deepseek-reasoner.pdf]

# HellaSwag, llama-3.1-8b to DeepSeek-R1

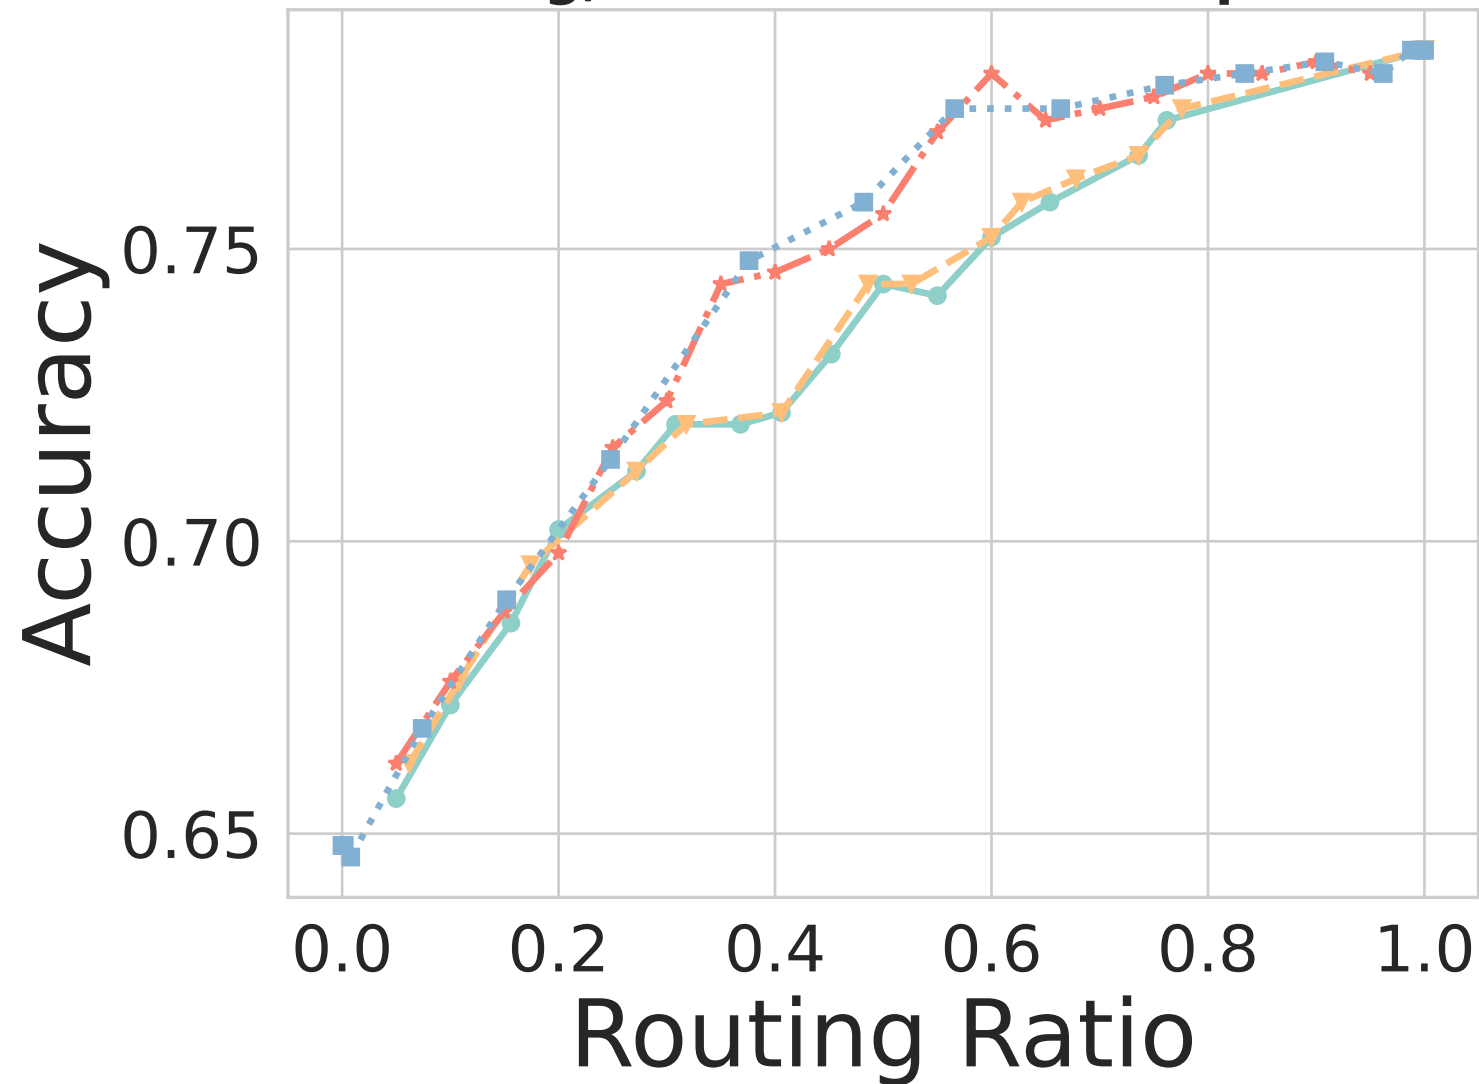

Supplement: supplementary_material [file cali_down_hellaswag_llama-3.1-8b_deepseek-reasoner.pdf › Routing_SLM_LLMs/Proxy_routing_prediction/to_deepseek-reasoner/hellaswag_as_downstream/cali_down_hellaswag_llama-3.1-8b_deepseek-reasoner.pdf]

# HellaSwag, llama-3.2-1b to DeepSeek-R1

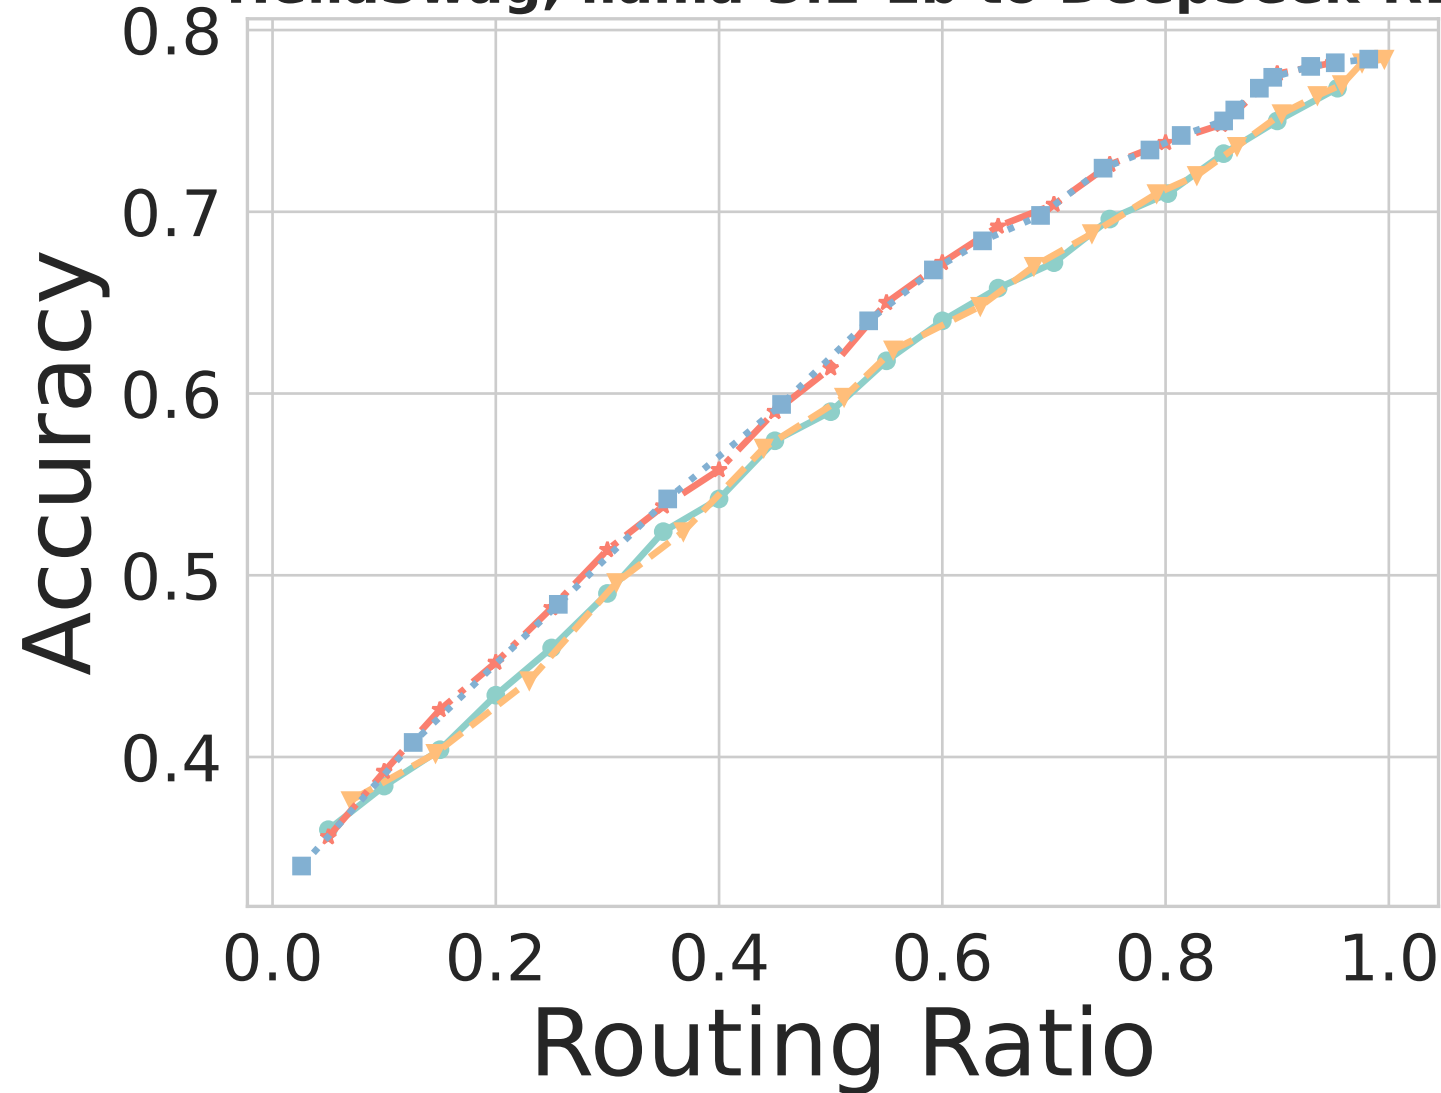

Supplement: supplementary_material [file cali_down_hellaswag_llama-3.2-1b_deepseek-reasoner.pdf › Routing_SLM_LLMs/Proxy_routing_prediction/to_deepseek-reasoner/hellaswag_as_downstream/cali_down_hellaswag_llama-3.2-1b_deepseek-reasoner.pdf]

# HellaSwag, llama-3.2-3b to DeepSeek-R1

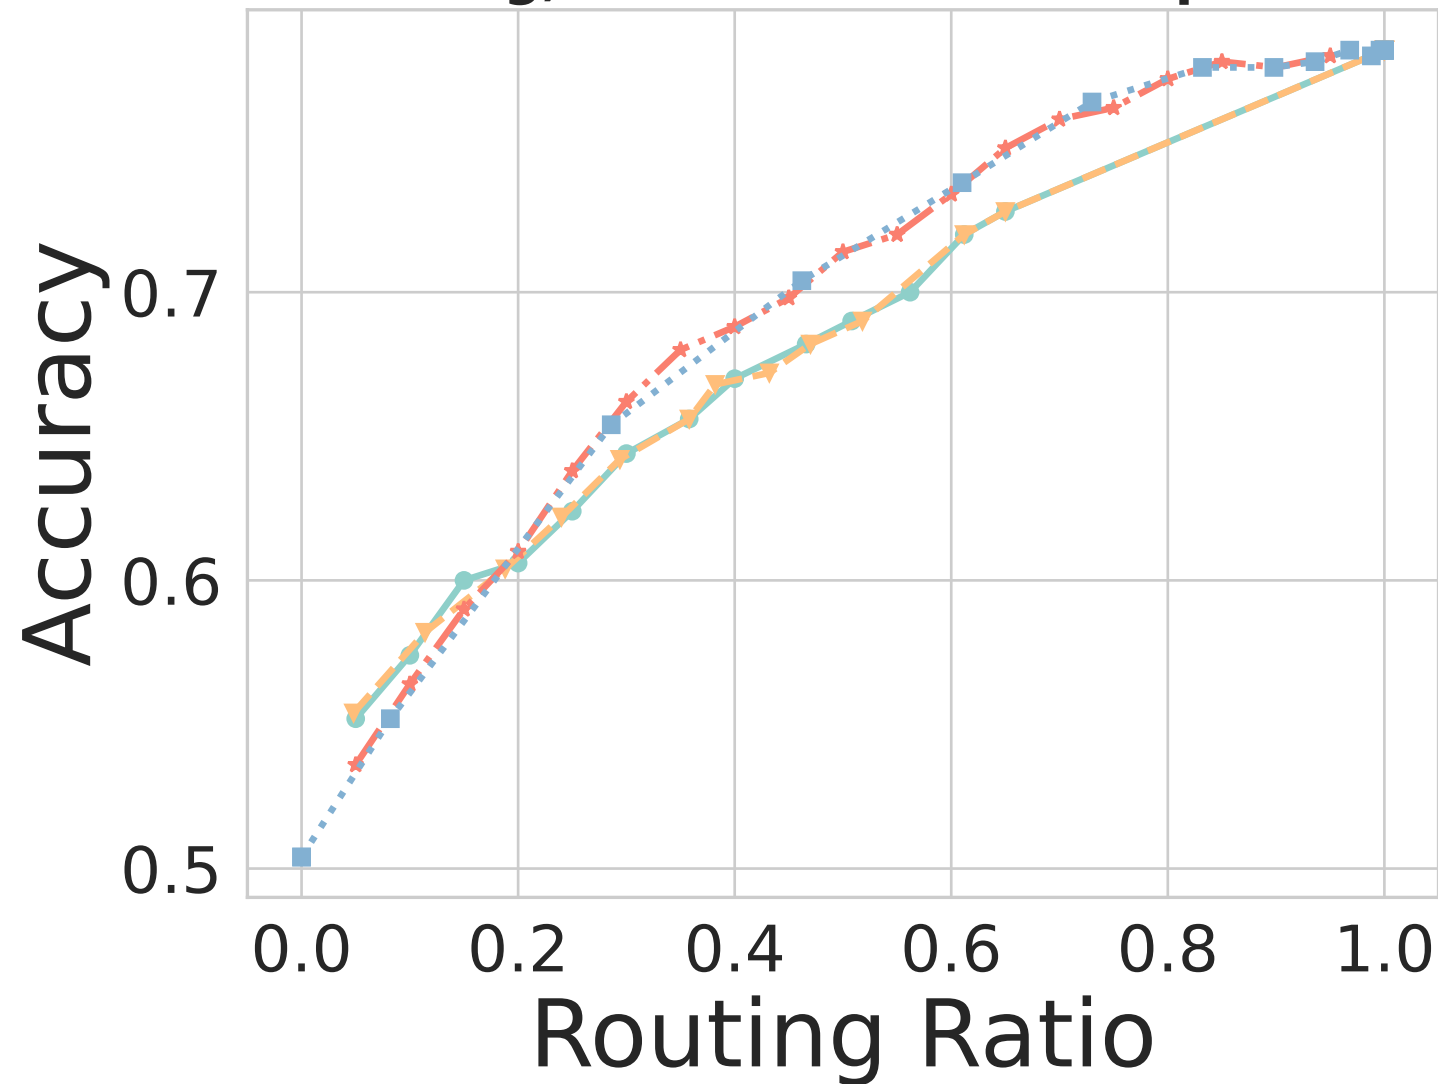

Supplement: supplementary_material [file cali_down_hellaswag_llama-3.2-3b_deepseek-reasoner.pdf › Routing_SLM_LLMs/Proxy_routing_prediction/to_deepseek-reasoner/hellaswag_as_downstream/cali_down_hellaswag_llama-3.2-3b_deepseek-reasoner.pdf]

**HellaSwag, mistral-7b to DeepSeek-R1**

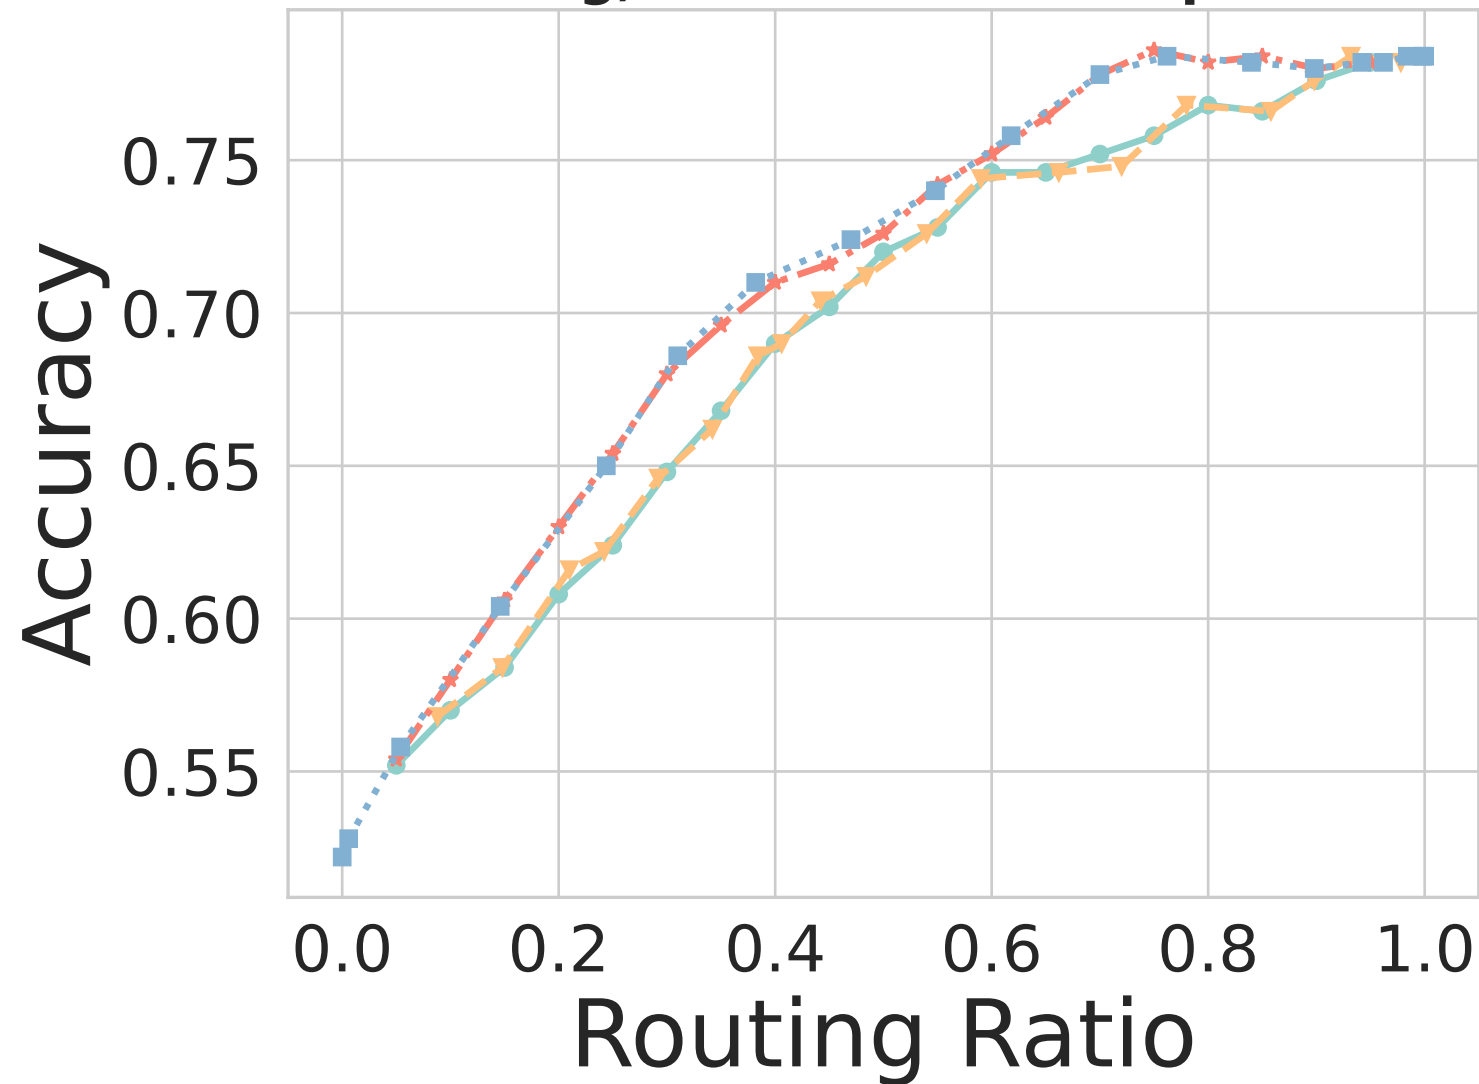

Supplement: supplementary_material [file cali_down_hellaswag_mistral-7b_deepseek-reasoner.pdf › Routing_SLM_LLMs/Proxy_routing_prediction/to_deepseek-reasoner/hellaswag_as_downstream/cali_down_hellaswag_mistral-7b_deepseek-reasoner.pdf]

**HellaSwag, phi-3.5-mini to DeepSeek-R1**

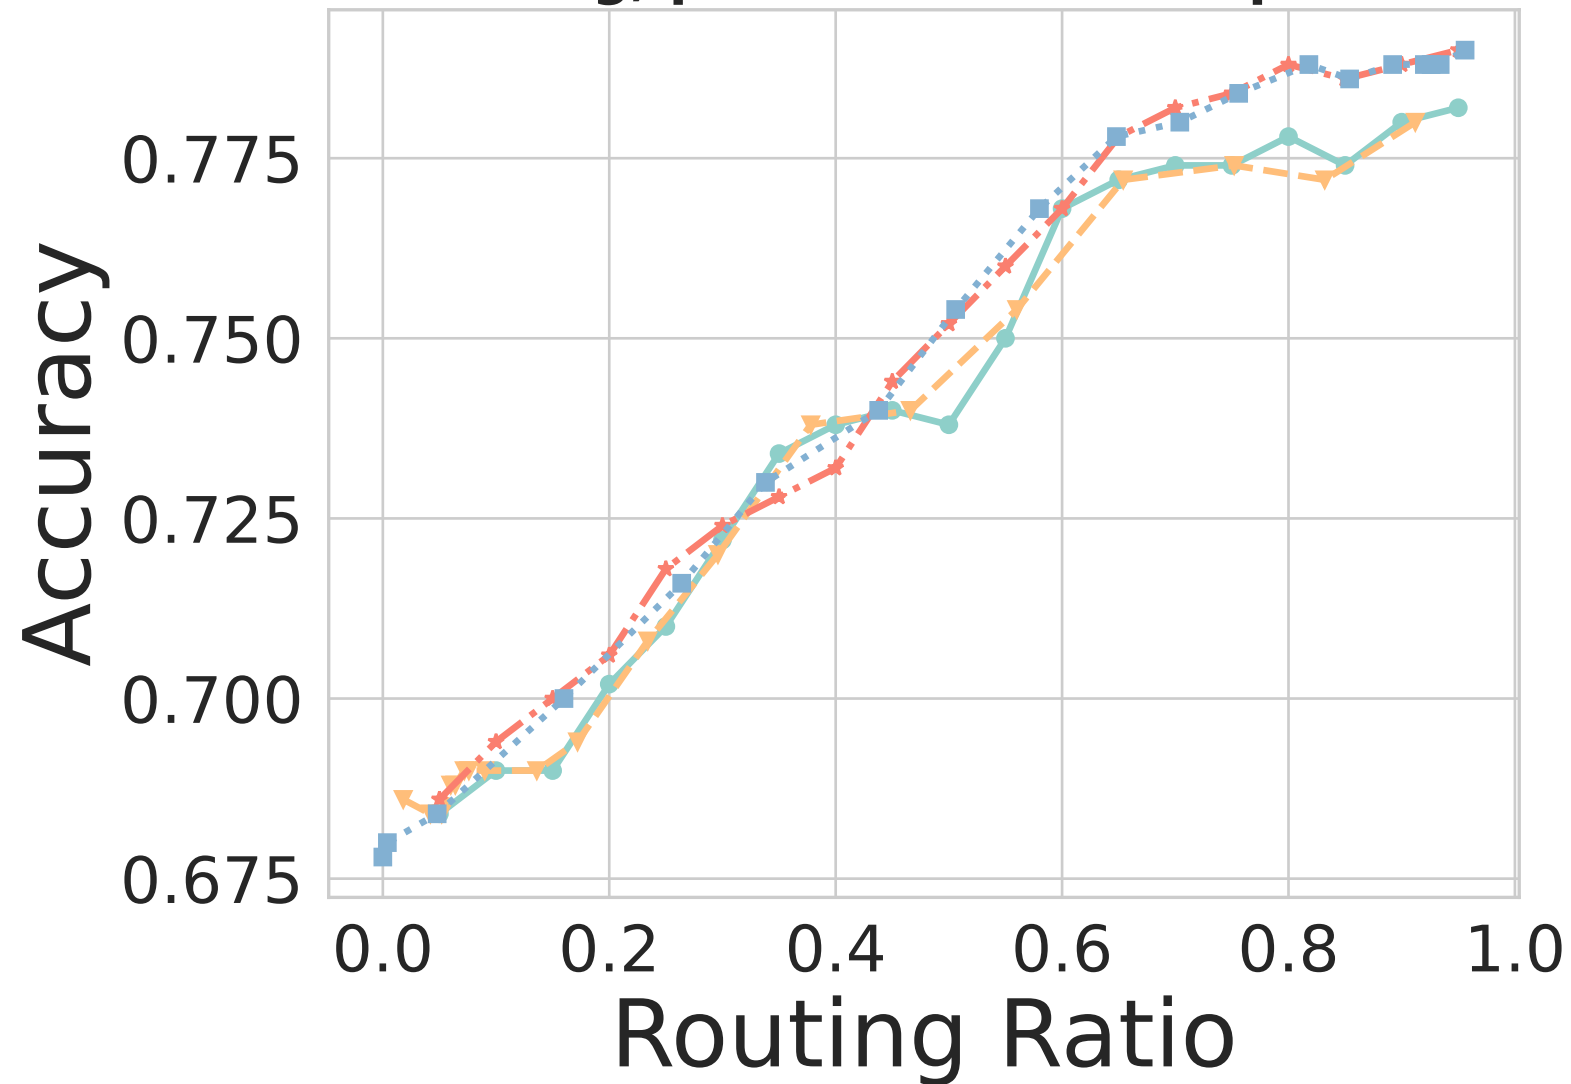

Supplement: supplementary_material [file cali_down_hellaswag_phi-3.5-mini_deepseek-reasoner.pdf › Routing_SLM_LLMs/Proxy_routing_prediction/to_deepseek-reasoner/hellaswag_as_downstream/cali_down_hellaswag_phi-3.5-mini_deepseek-reasoner.pdf]

# HellaSwag, phi-4-mini-reasoning to DeepSeek-R1

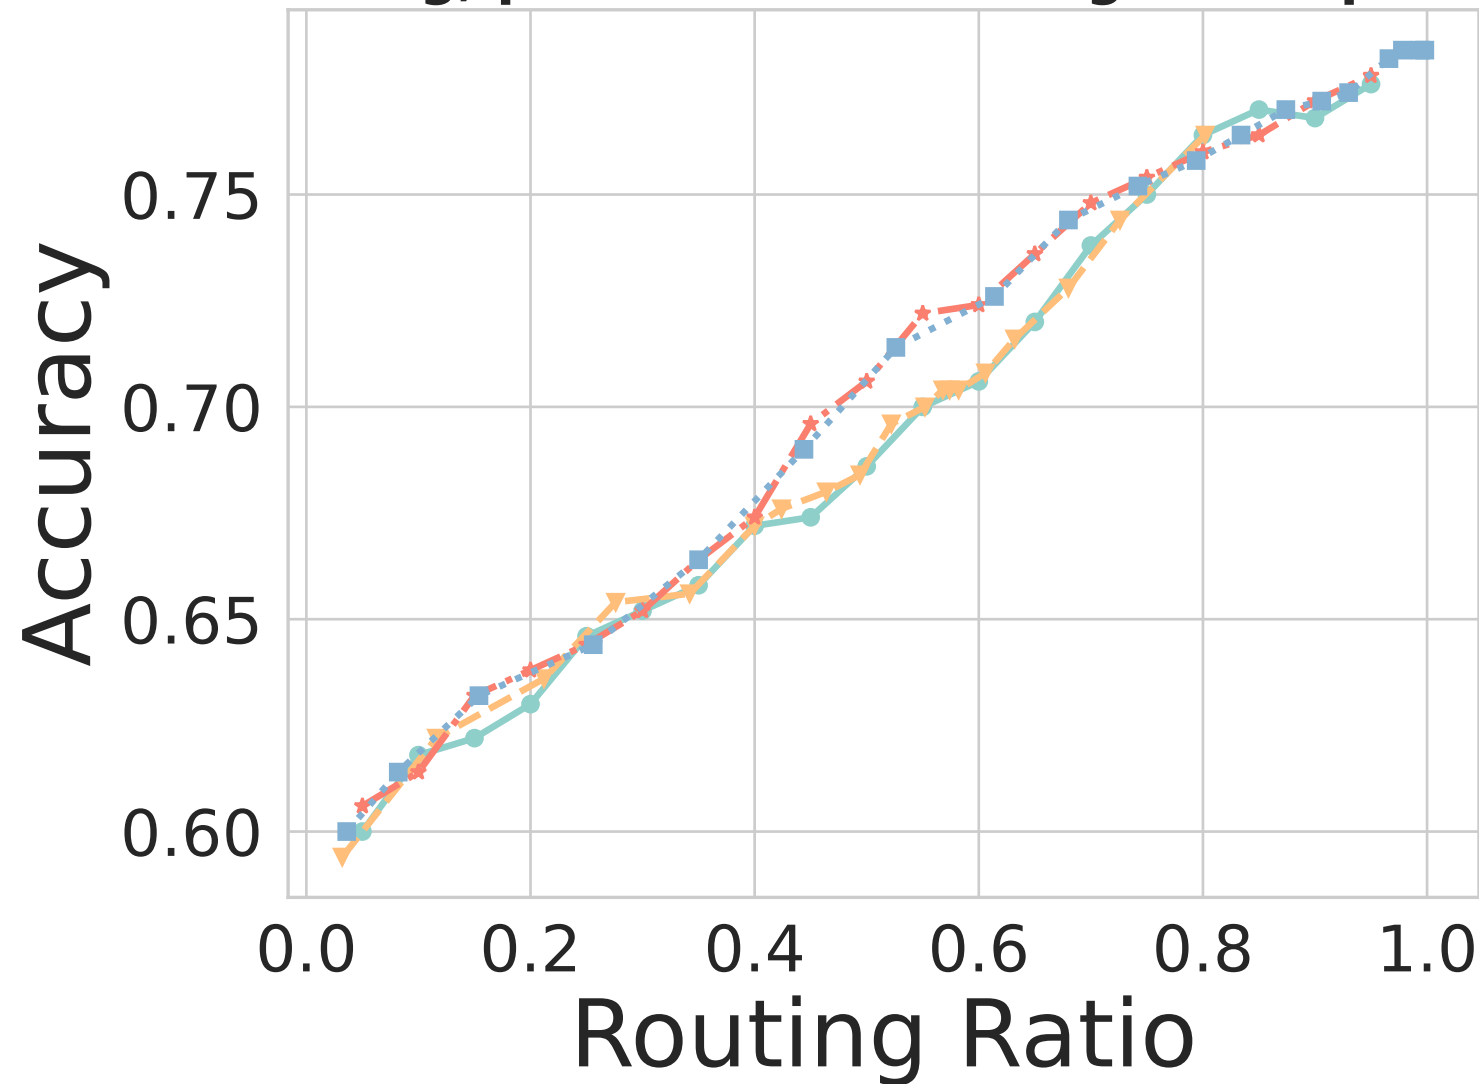

Supplement: supplementary_material [file cali_down_hellaswag_phi-4-mini-reasoning_deepseek-reasoner.pdf › Routing_SLM_LLMs/Proxy_routing_prediction/to_deepseek-reasoner/hellaswag_as_downstream/cali_down_hellaswag_phi-4-mini-reasoning_deepseek-reasoner.pdf]

**HellaSwag, qwen-2.5-7b to DeepSeek-R1**

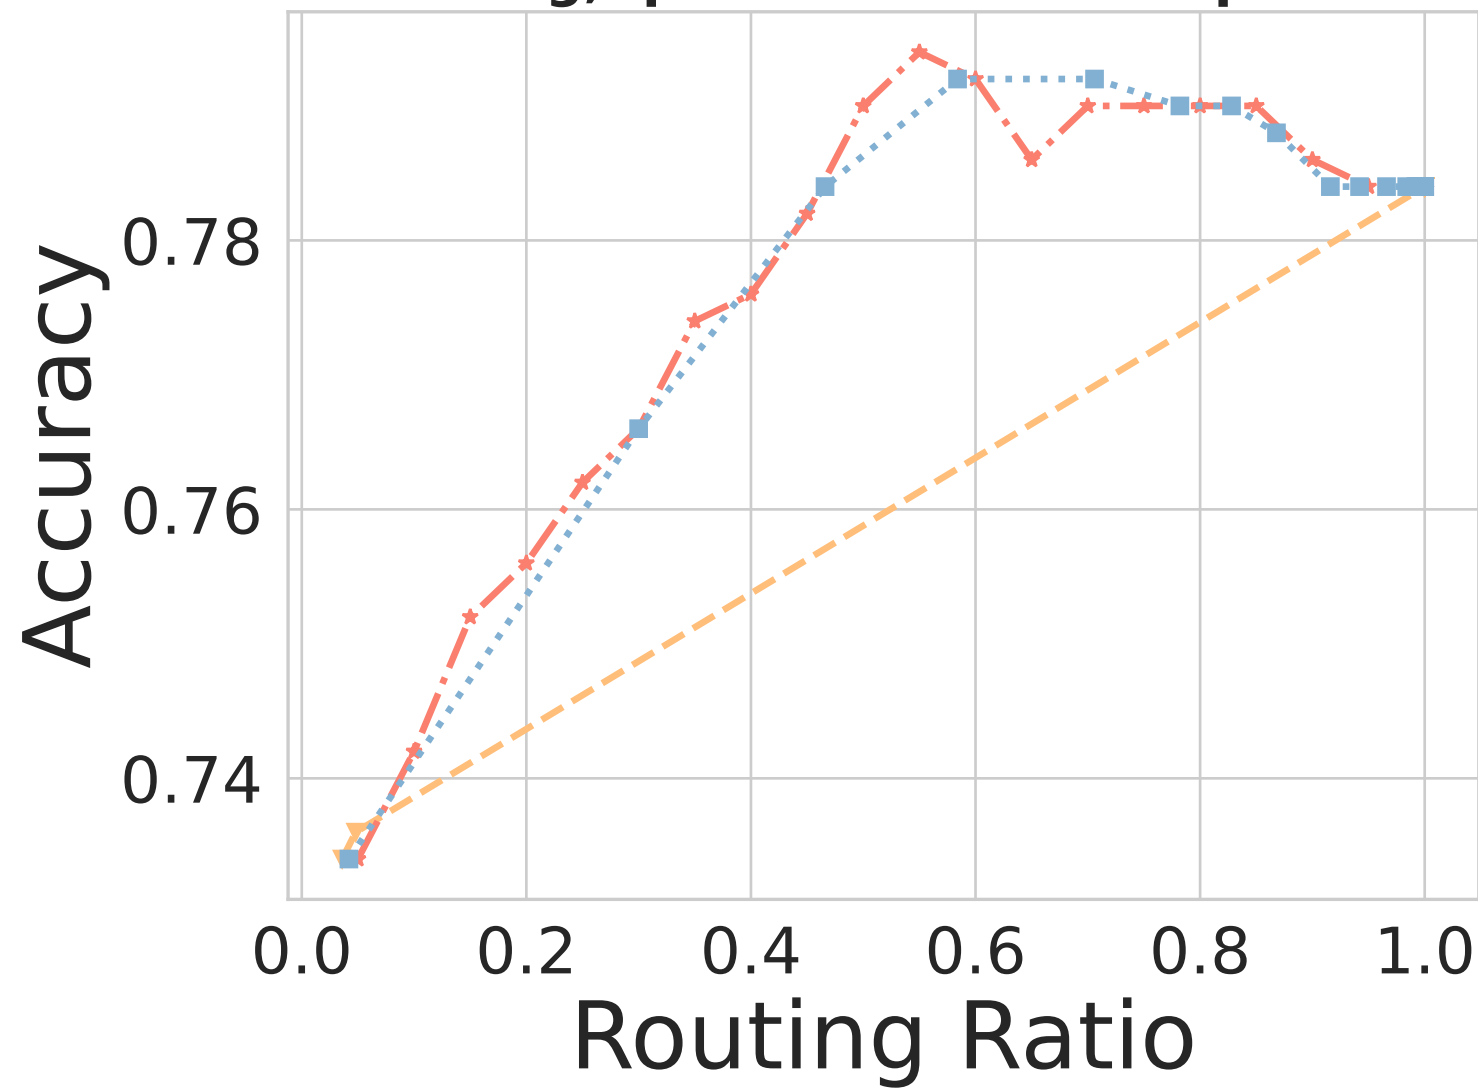

Supplement: supplementary_material [file cali_down_hellaswag_qwen-2.5-7b_deepseek-reasoner.pdf › Routing_SLM_LLMs/Proxy_routing_prediction/to_deepseek-reasoner/hellaswag_as_downstream/cali_down_hellaswag_qwen-2.5-7b_deepseek-reasoner.pdf]

**HellaSwag, rwkv to DeepSeek-R1**

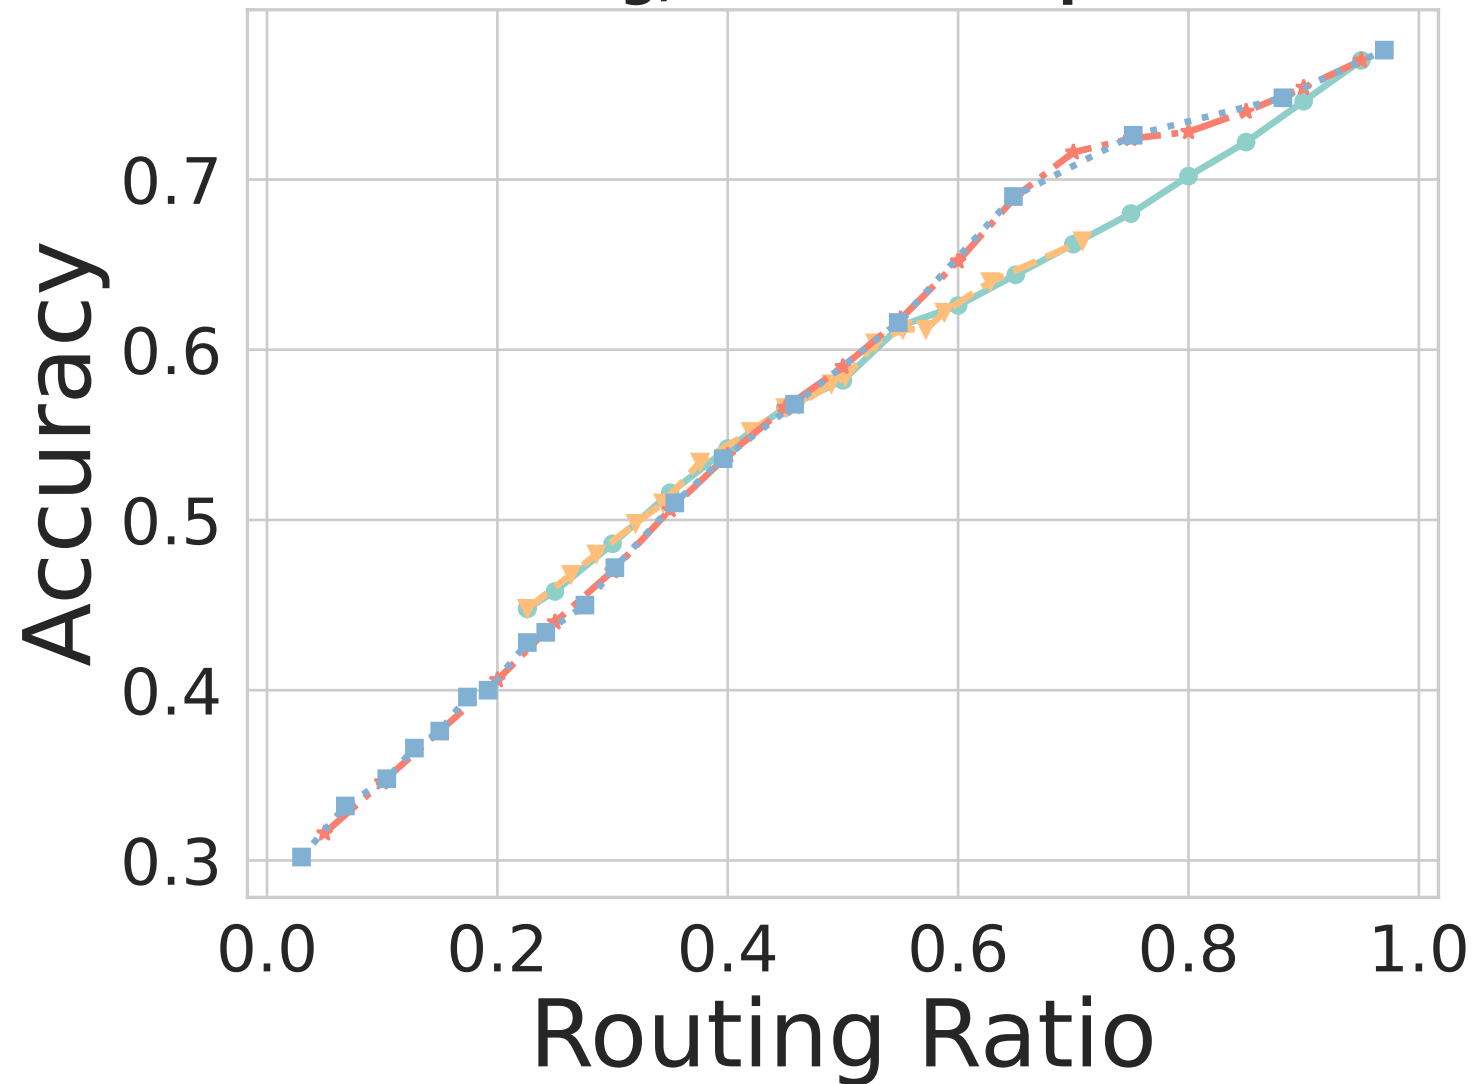

Supplement: supplementary_material [file cali_down_hellaswag_rwkv_deepseek-reasoner.pdf › Routing_SLM_LLMs/Proxy_routing_prediction/to_deepseek-reasoner/hellaswag_as_downstream/cali_down_hellaswag_rwkv_deepseek-reasoner.pdf]

**MATH-500, Qwen3-0.6B to DeepSeek-R1**

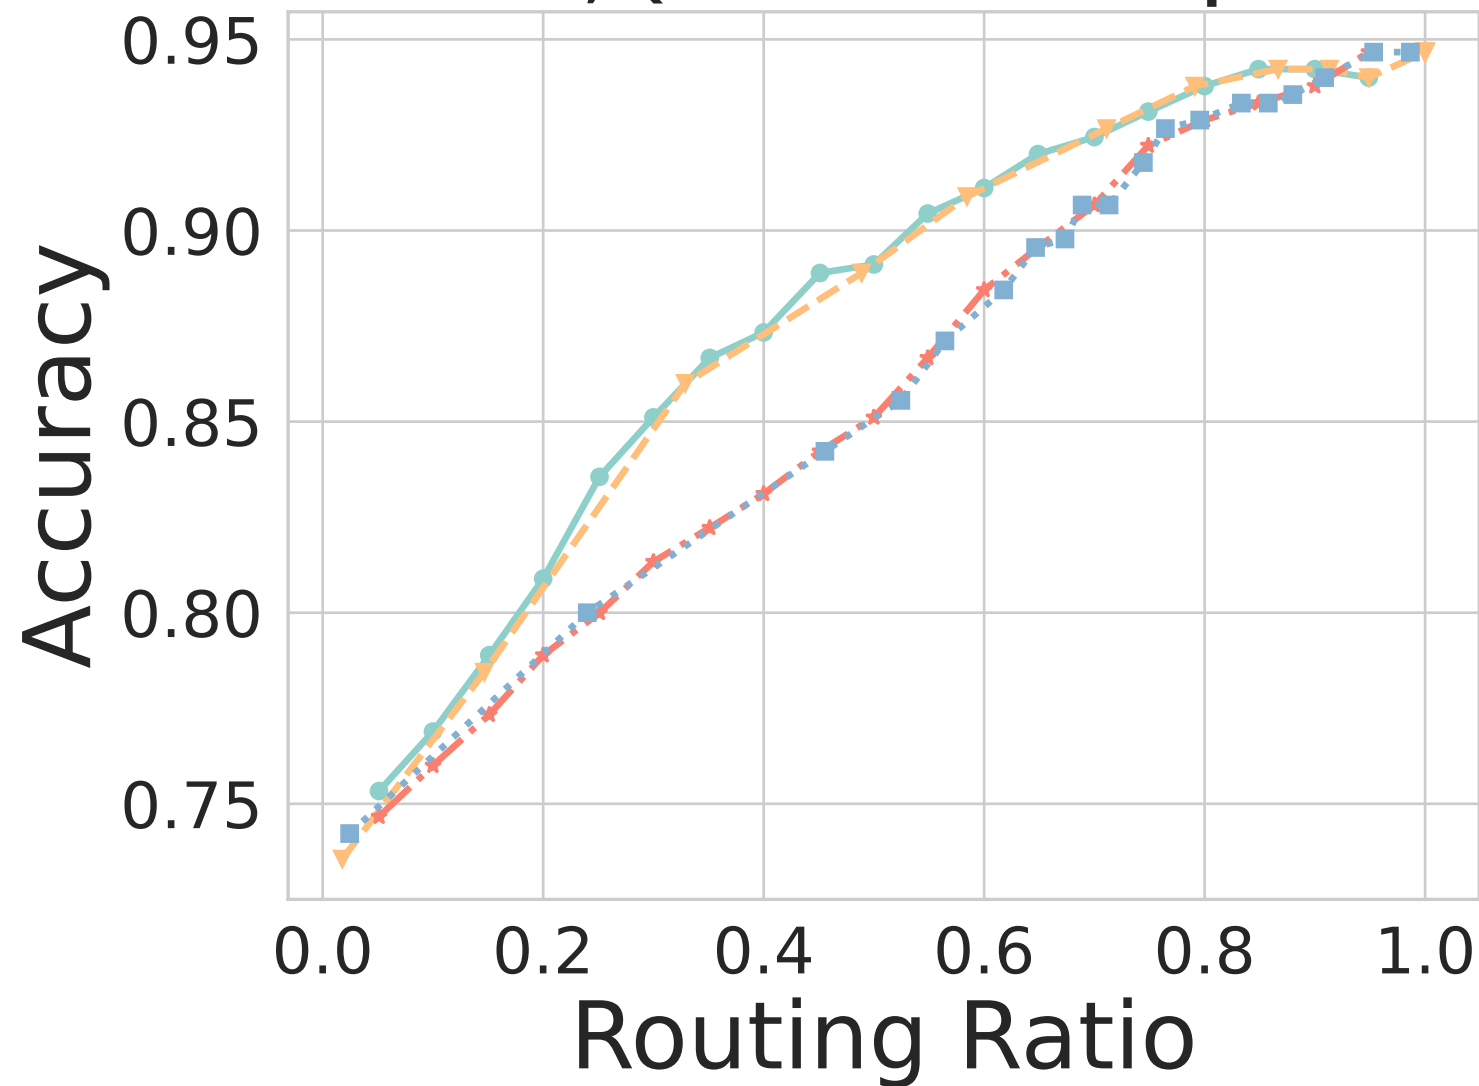

Supplement: supplementary_material [file cali_down_math_500_Qwen3-0.6B_deepseek-reasoner.pdf › Routing_SLM_LLMs/Proxy_routing_prediction/to_deepseek-reasoner/math_500_as_downstream/cali_down_math_500_Qwen3-0.6B_deepseek-reasoner.pdf]

**MATH-500, Qwen3-1.7B to DeepSeek-R1**

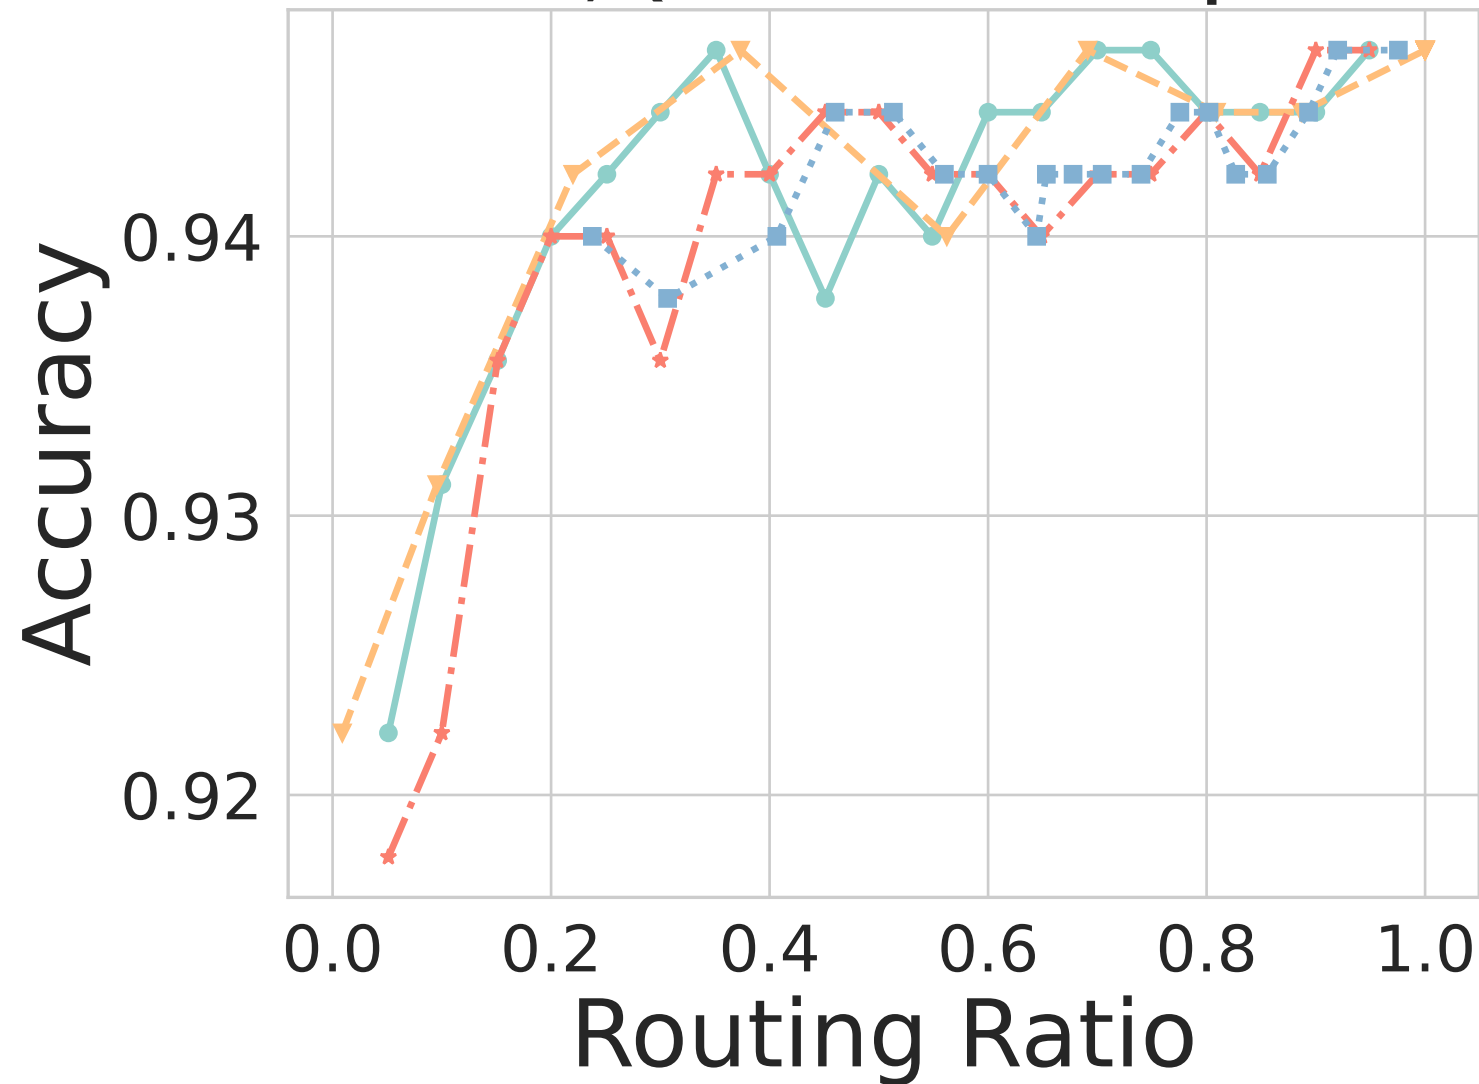

Supplement: supplementary_material [file cali_down_math_500_Qwen3-1.7B_deepseek-reasoner.pdf › Routing_SLM_LLMs/Proxy_routing_prediction/to_deepseek-reasoner/math_500_as_downstream/cali_down_math_500_Qwen3-1.7B_deepseek-reasoner.pdf]

**MATH-500, Qwen3-4B to DeepSeek-R1**

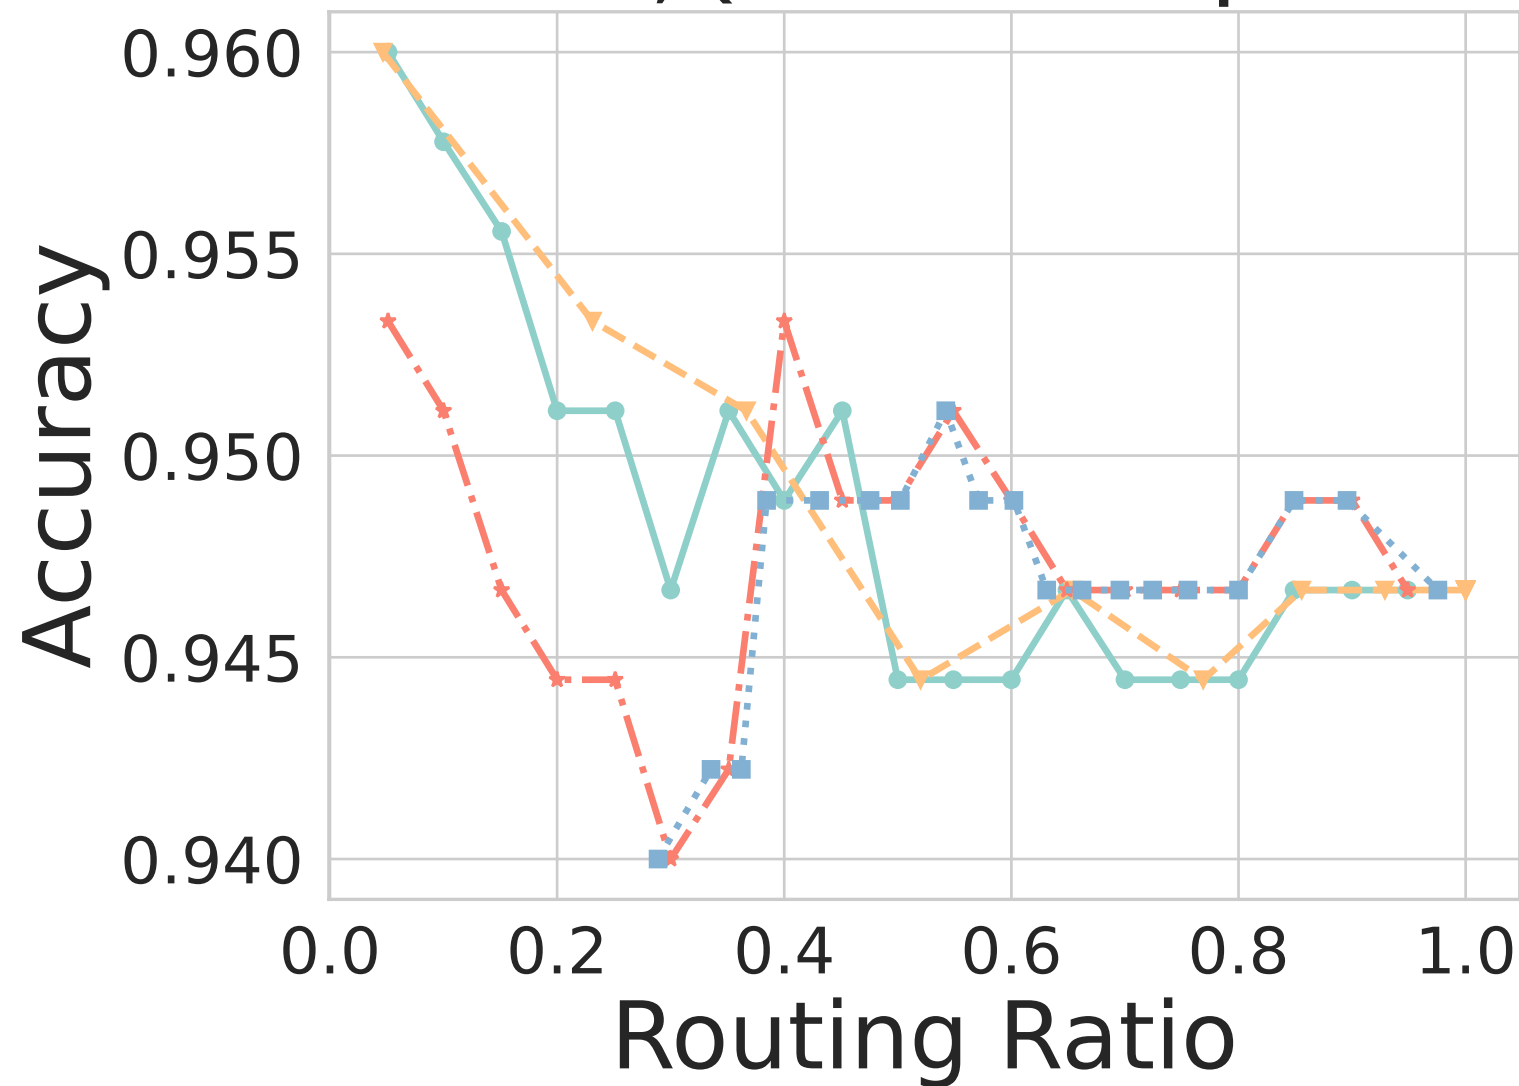

Supplement: supplementary_material [file cali_down_math_500_Qwen3-4B_deepseek-reasoner.pdf › Routing_SLM_LLMs/Proxy_routing_prediction/to_deepseek-reasoner/math_500_as_downstream/cali_down_math_500_Qwen3-4B_deepseek-reasoner.pdf]

# MATH-500, granite-3.1-8b to DeepSeek-R1

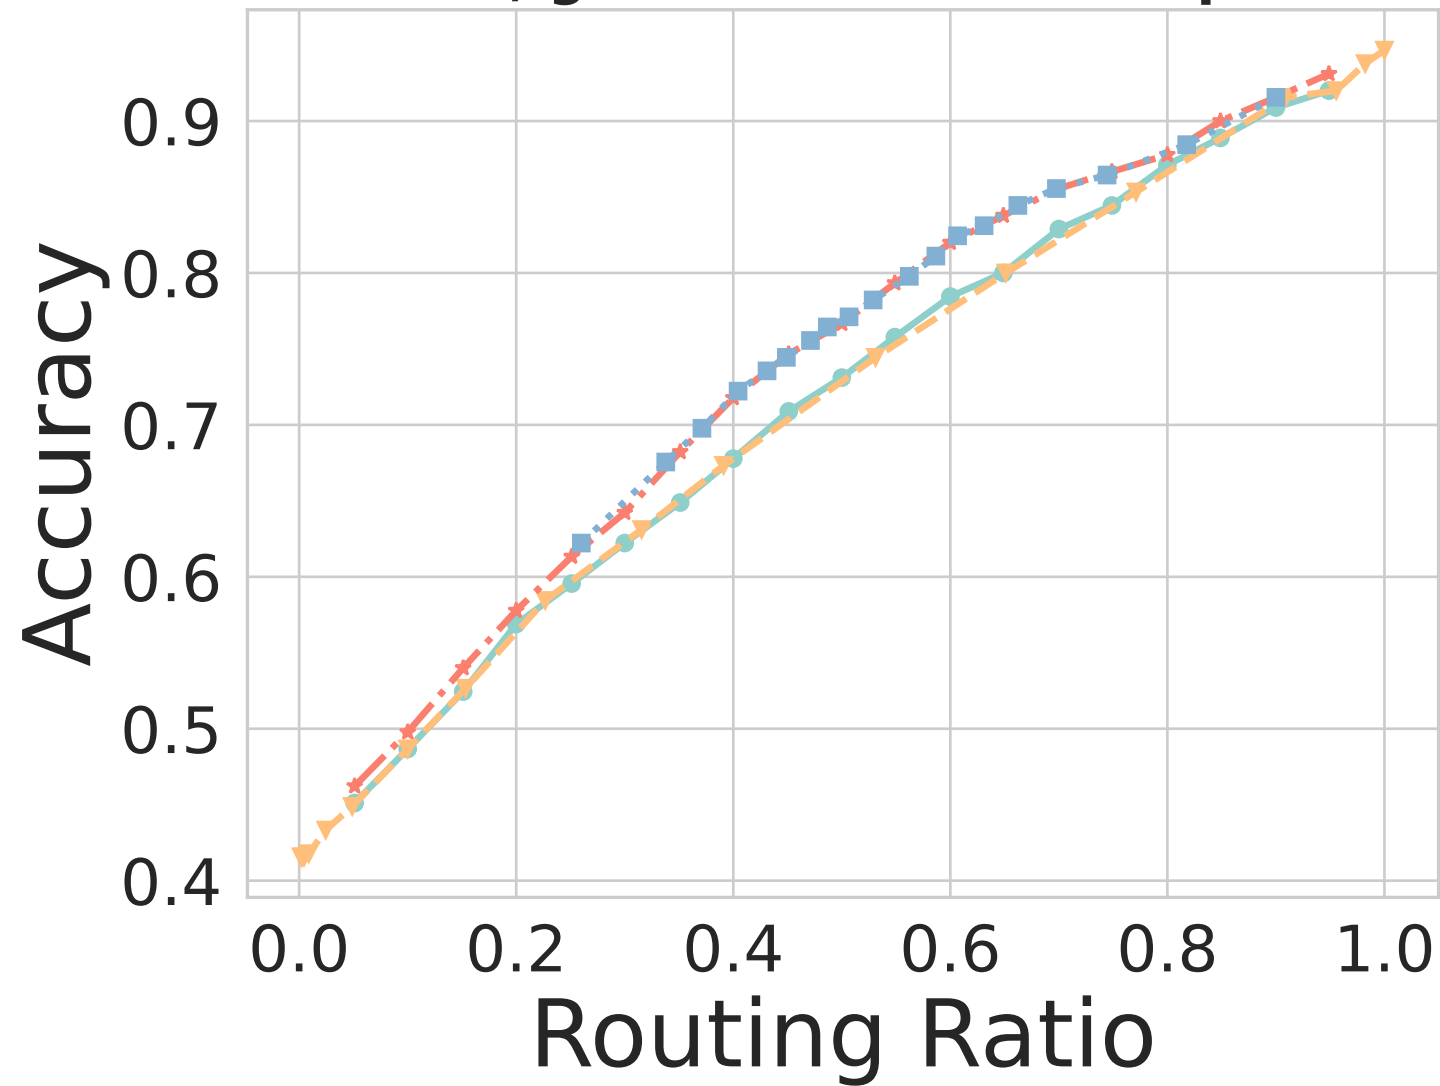

Supplement: supplementary_material [file cali_down_math_500_granite-3.1-8b_deepseek-reasoner.pdf › Routing_SLM_LLMs/Proxy_routing_prediction/to_deepseek-reasoner/math_500_as_downstream/cali_down_math_500_granite-3.1-8b_deepseek-reasoner.pdf]

# MATH-500, llama-3.1-8b to DeepSeek-R1

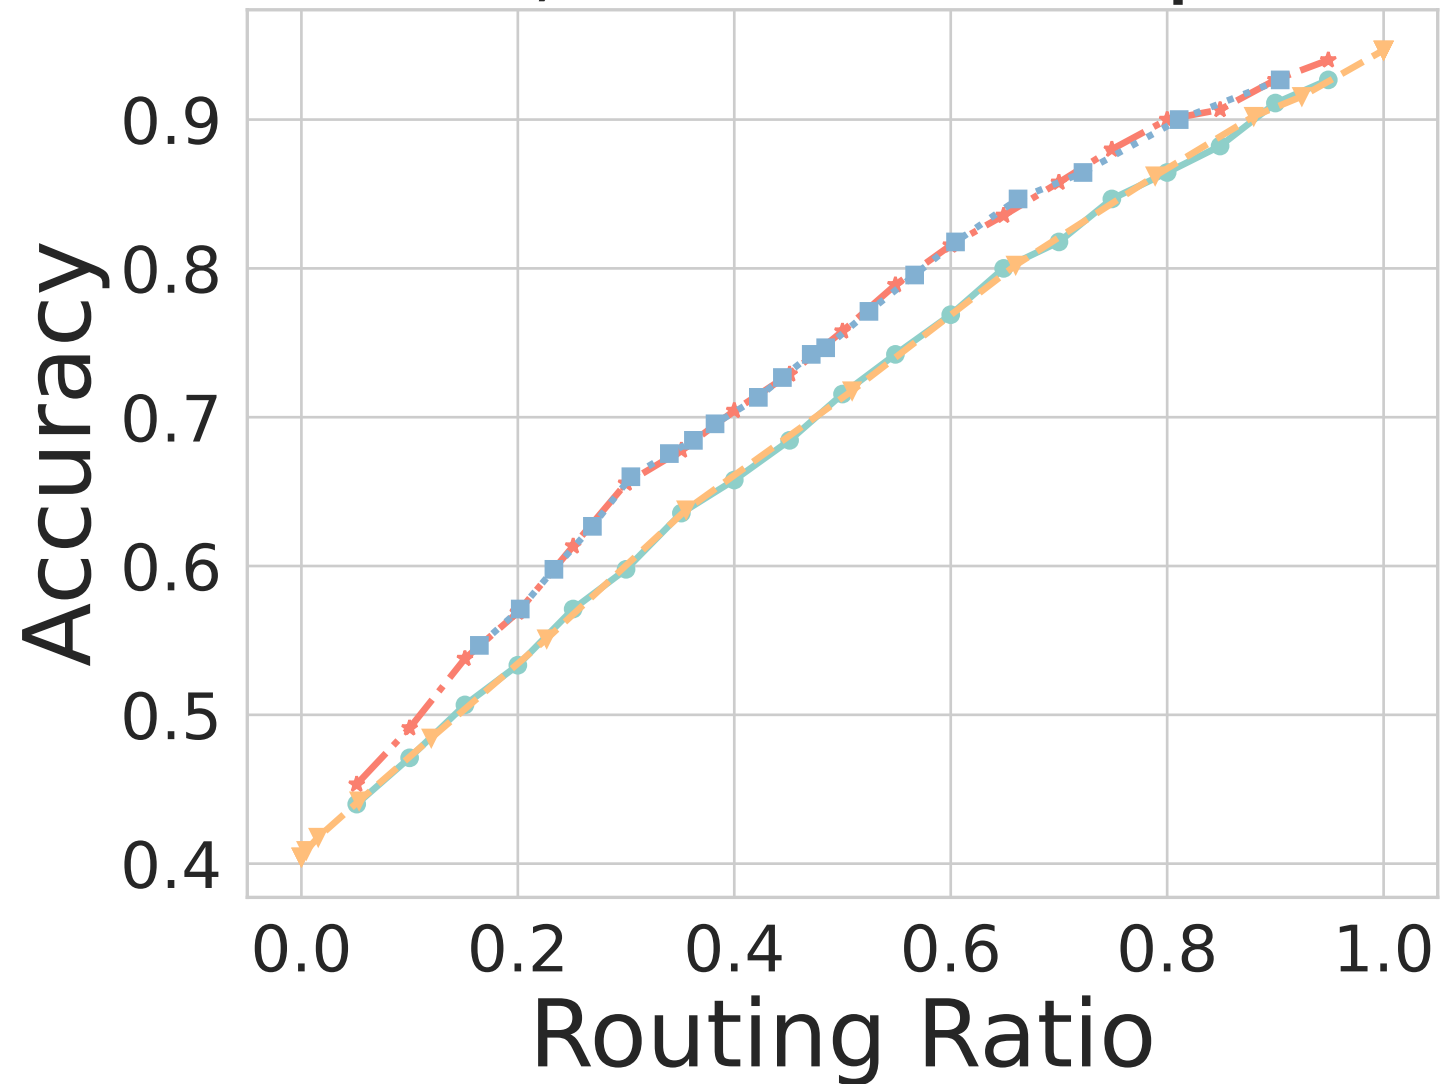

Supplement: supplementary_material [file cali_down_math_500_llama-3.1-8b_deepseek-reasoner.pdf › Routing_SLM_LLMs/Proxy_routing_prediction/to_deepseek-reasoner/math_500_as_downstream/cali_down_math_500_llama-3.1-8b_deepseek-reasoner.pdf]

# MATH-500, llama-3.2-1b to DeepSeek-R1

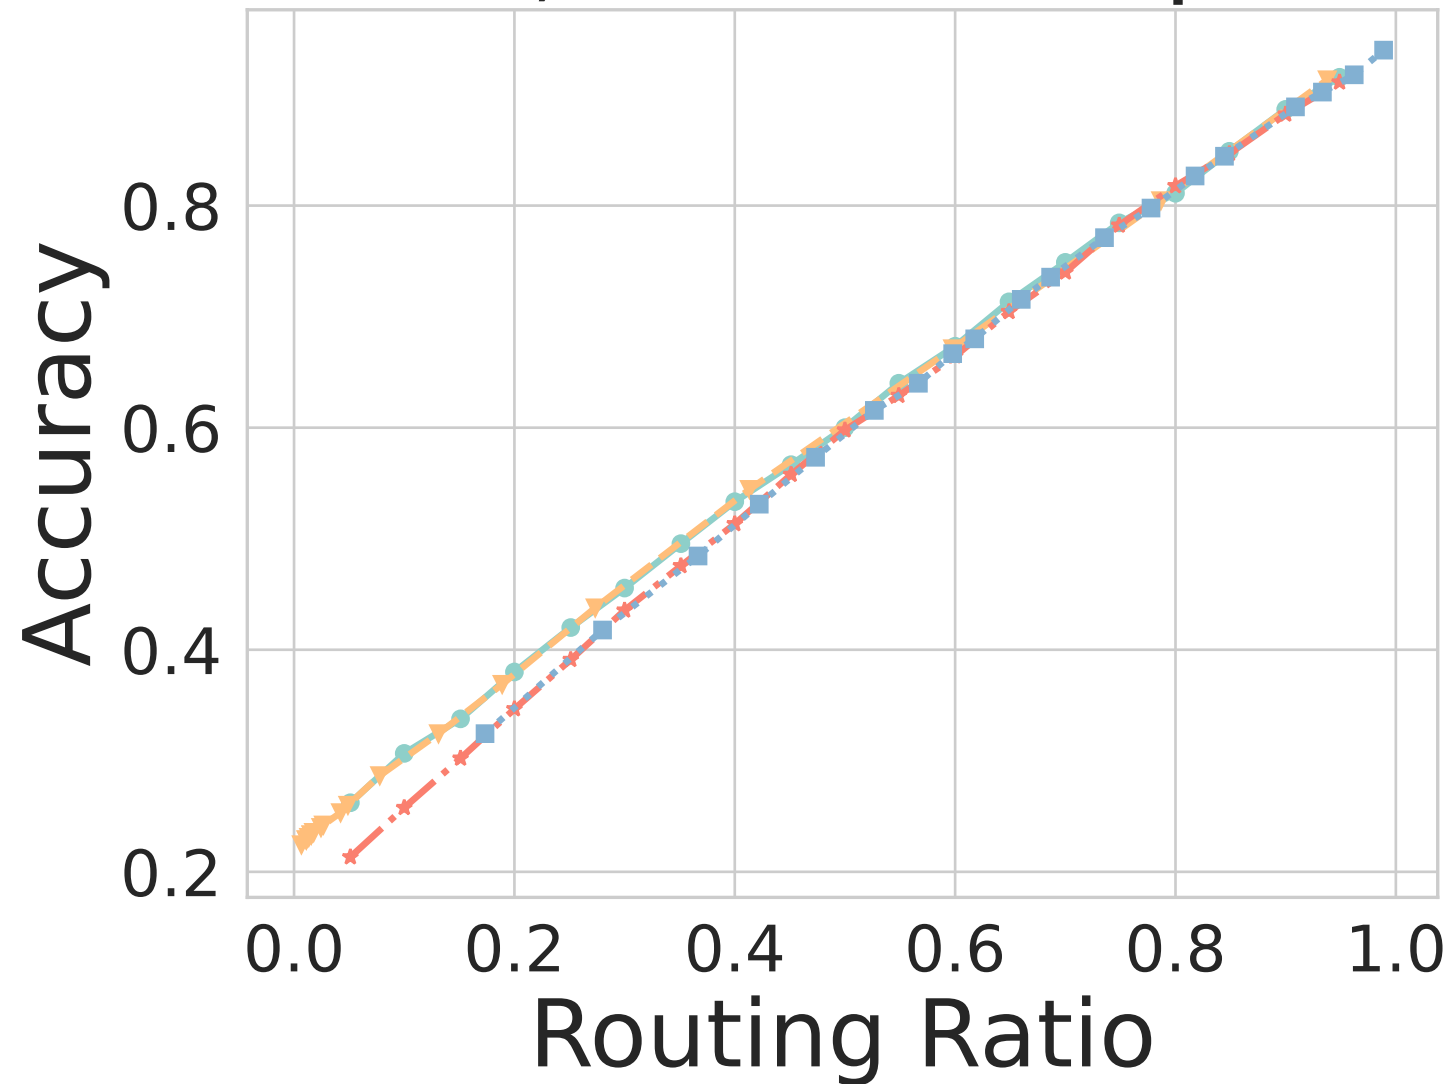

Supplement: supplementary_material [file cali_down_math_500_llama-3.2-1b_deepseek-reasoner.pdf › Routing_SLM_LLMs/Proxy_routing_prediction/to_deepseek-reasoner/math_500_as_downstream/cali_down_math_500_llama-3.2-1b_deepseek-reasoner.pdf]

# MATH-500, llama-3.2-3b to DeepSeek-R1

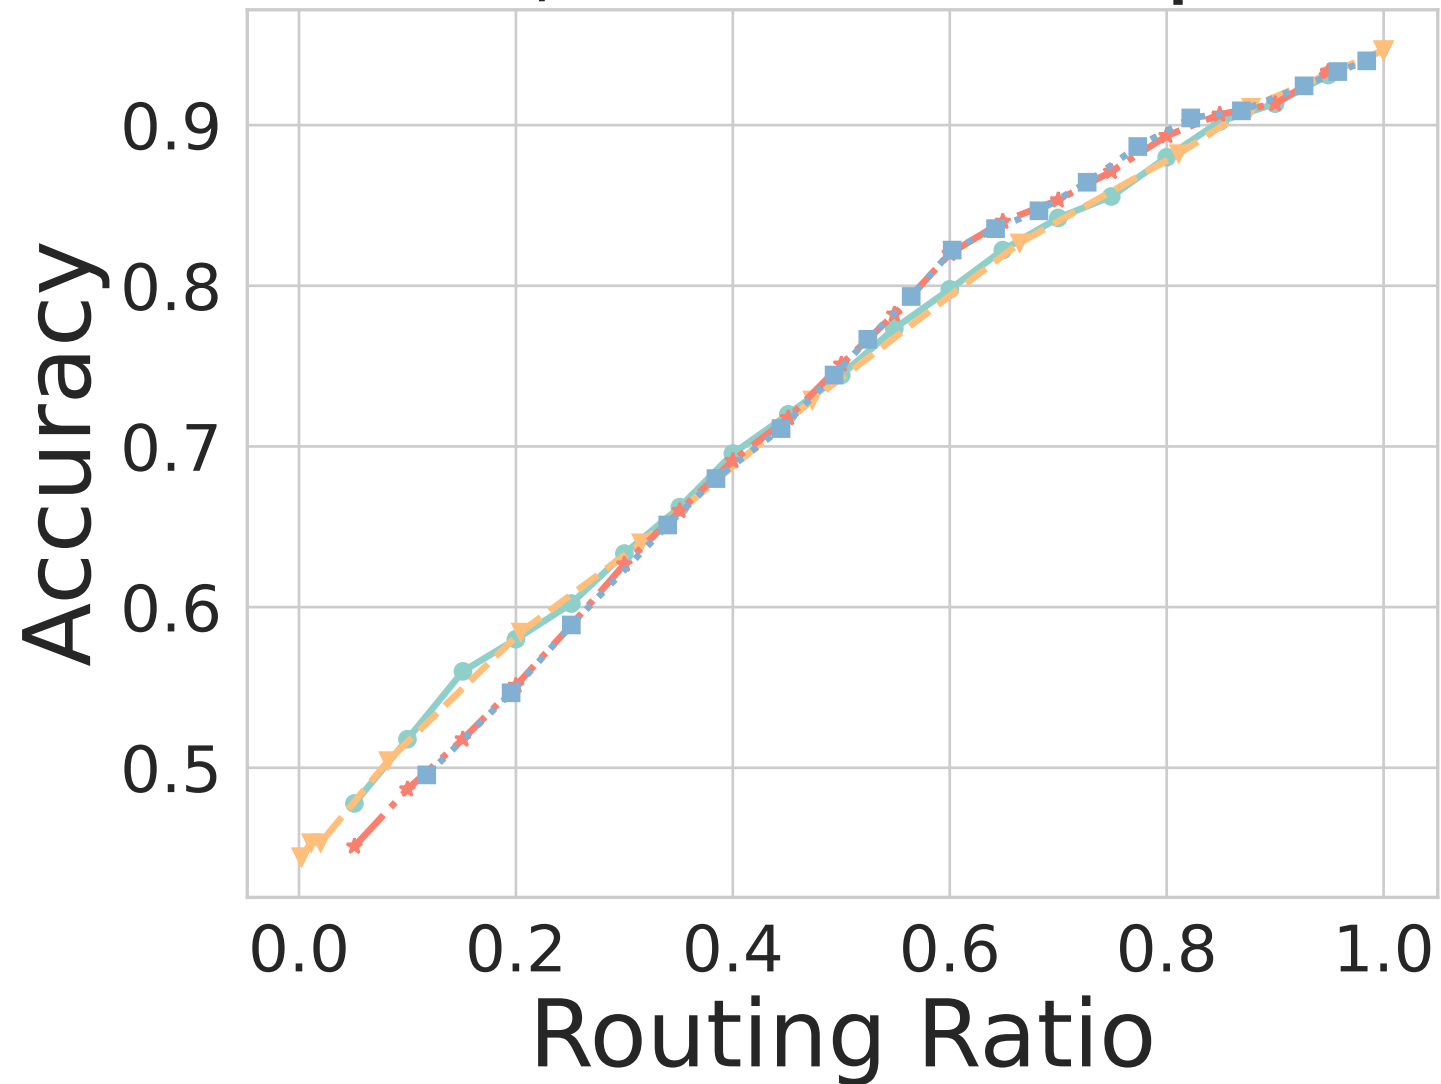

Supplement: supplementary_material [file cali_down_math_500_llama-3.2-3b_deepseek-reasoner.pdf › Routing_SLM_LLMs/Proxy_routing_prediction/to_deepseek-reasoner/math_500_as_downstream/cali_down_math_500_llama-3.2-3b_deepseek-reasoner.pdf]

**MATH-500, mistral-7b to DeepSeek-R1**

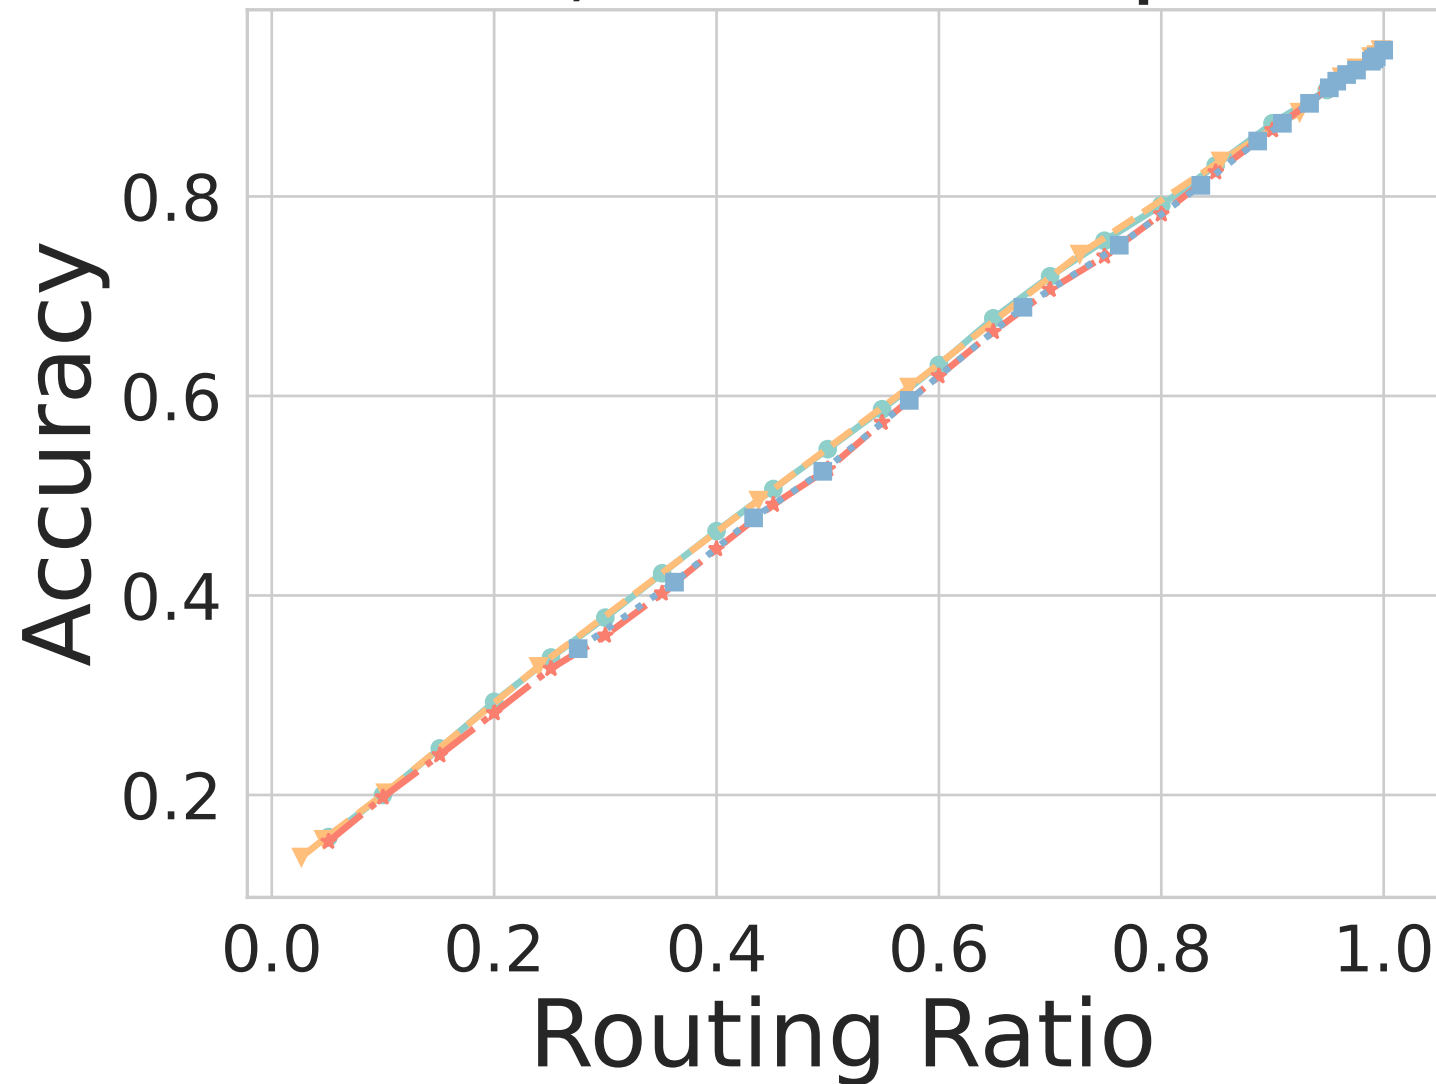

Supplement: supplementary_material [file cali_down_math_500_mistral-7b_deepseek-reasoner.pdf › Routing_SLM_LLMs/Proxy_routing_prediction/to_deepseek-reasoner/math_500_as_downstream/cali_down_math_500_mistral-7b_deepseek-reasoner.pdf]

**MATH-500, phi-3.5-mini to DeepSeek-R1**

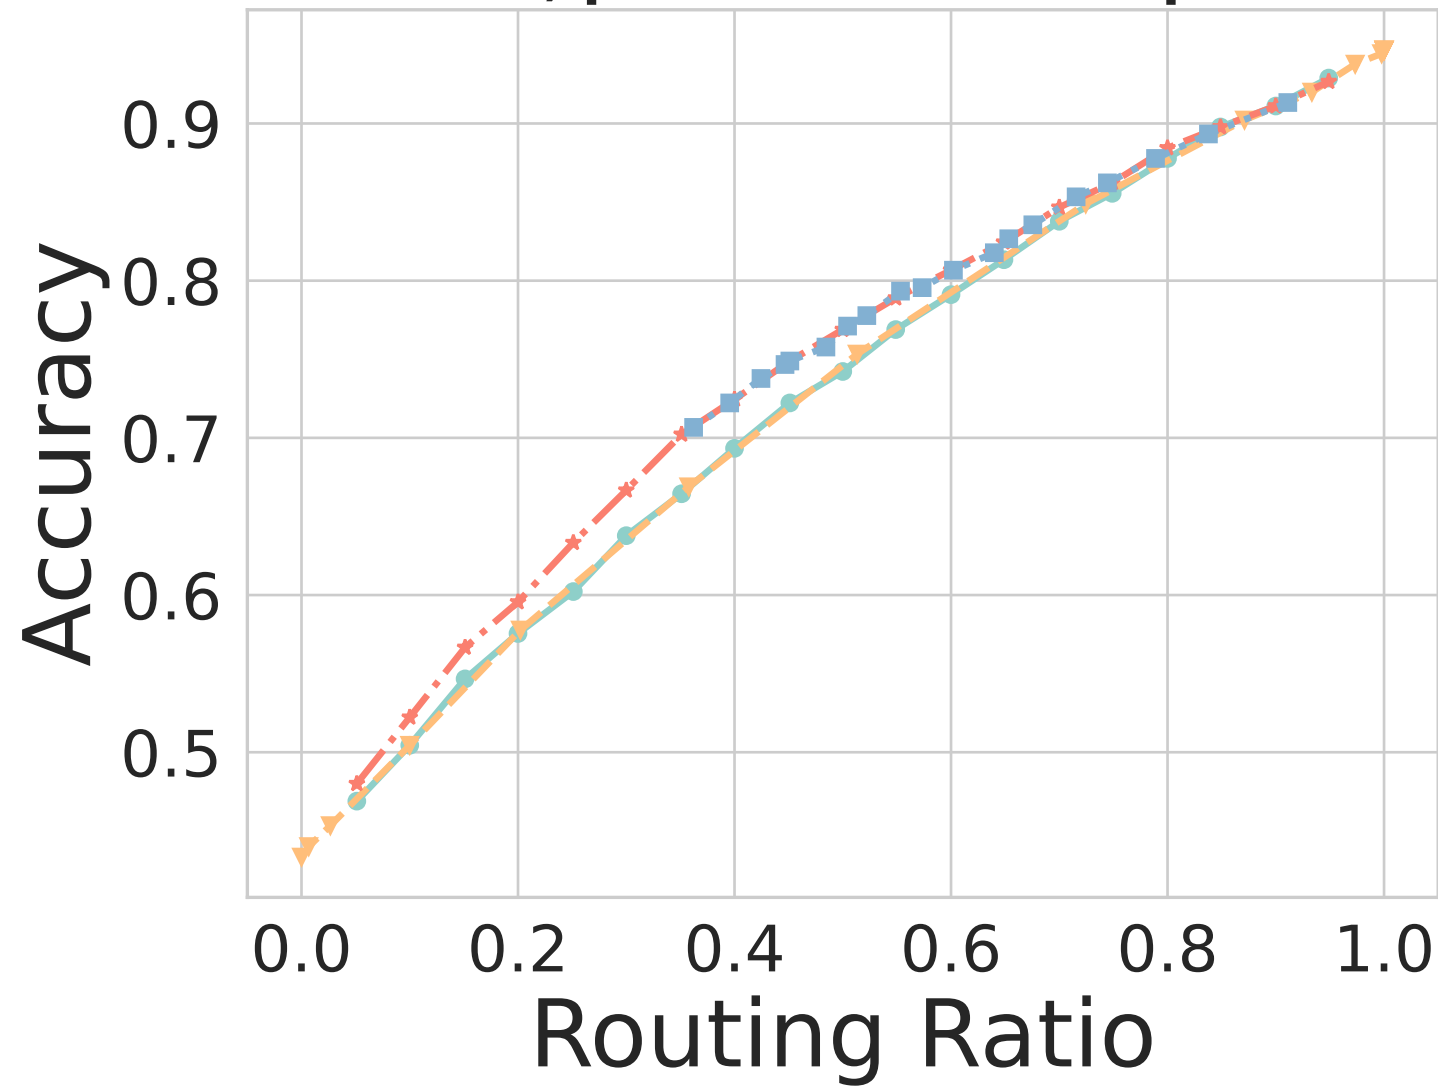

Supplement: supplementary_material [file cali_down_math_500_phi-3.5-mini_deepseek-reasoner.pdf › Routing_SLM_LLMs/Proxy_routing_prediction/to_deepseek-reasoner/math_500_as_downstream/cali_down_math_500_phi-3.5-mini_deepseek-reasoner.pdf]

**MATH-500, phi-4-mini-reasoning to DeepSeek-R1**

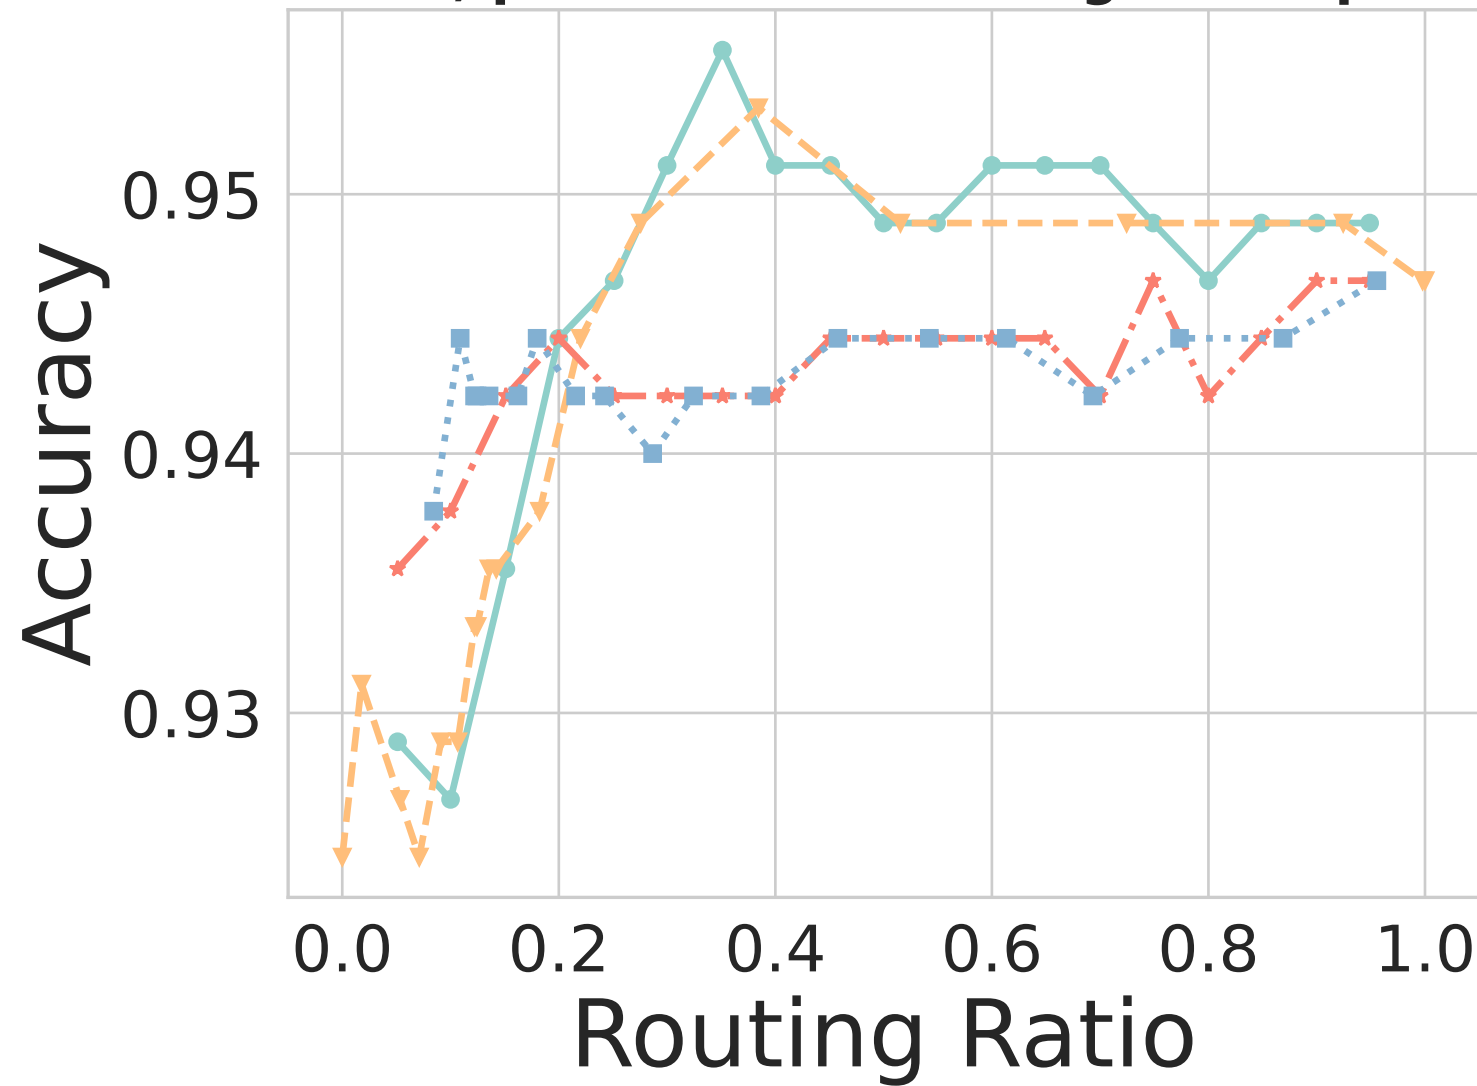

Supplement: supplementary_material [file cali_down_math_500_phi-4-mini-reasoning_deepseek-reasoner.pdf › Routing_SLM_LLMs/Proxy_routing_prediction/to_deepseek-reasoner/math_500_as_downstream/cali_down_math_500_phi-4-mini-reasoning_deepseek-reasoner.pdf]

# MATH-500, qwen-2.5-7b to DeepSeek-R1

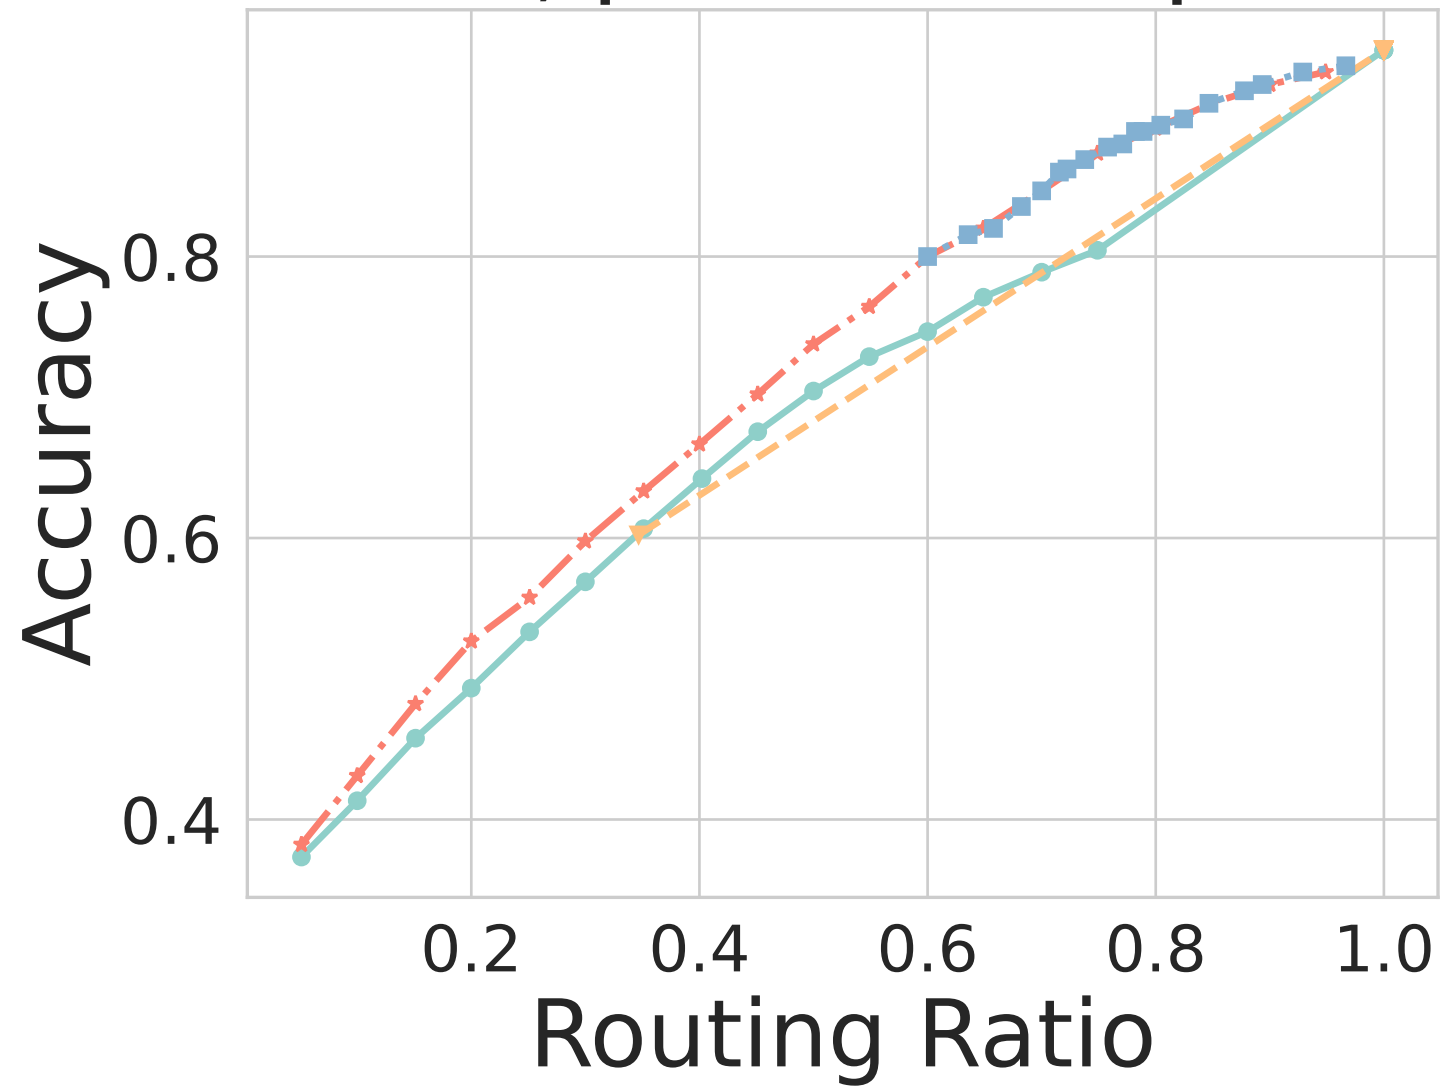

Supplement: supplementary_material [file cali_down_math_500_qwen-2.5-7b_deepseek-reasoner.pdf › Routing_SLM_LLMs/Proxy_routing_prediction/to_deepseek-reasoner/math_500_as_downstream/cali_down_math_500_qwen-2.5-7b_deepseek-reasoner.pdf]

**MATH-500, rwkv to DeepSeek-R1**

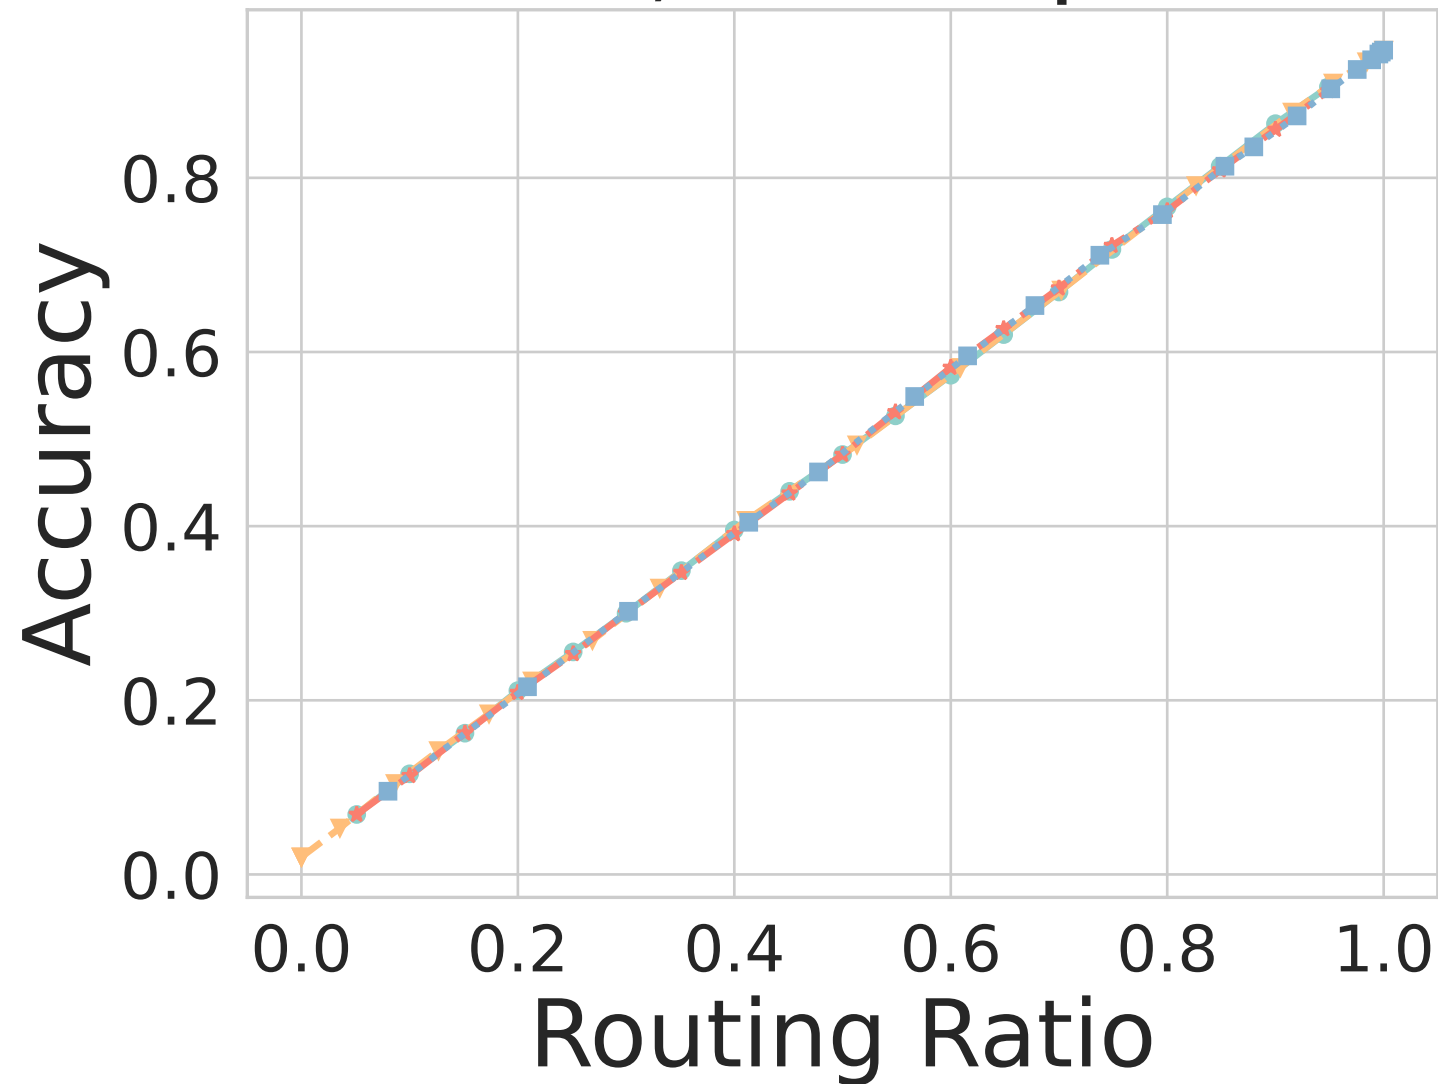

Supplement: supplementary_material [file cali_down_math_500_rwkv_deepseek-reasoner.pdf › Routing_SLM_LLMs/Proxy_routing_prediction/to_deepseek-reasoner/math_500_as_downstream/cali_down_math_500_rwkv_deepseek-reasoner.pdf]

**MMLU, Qwen3-0.6B to DeepSeek-R1**

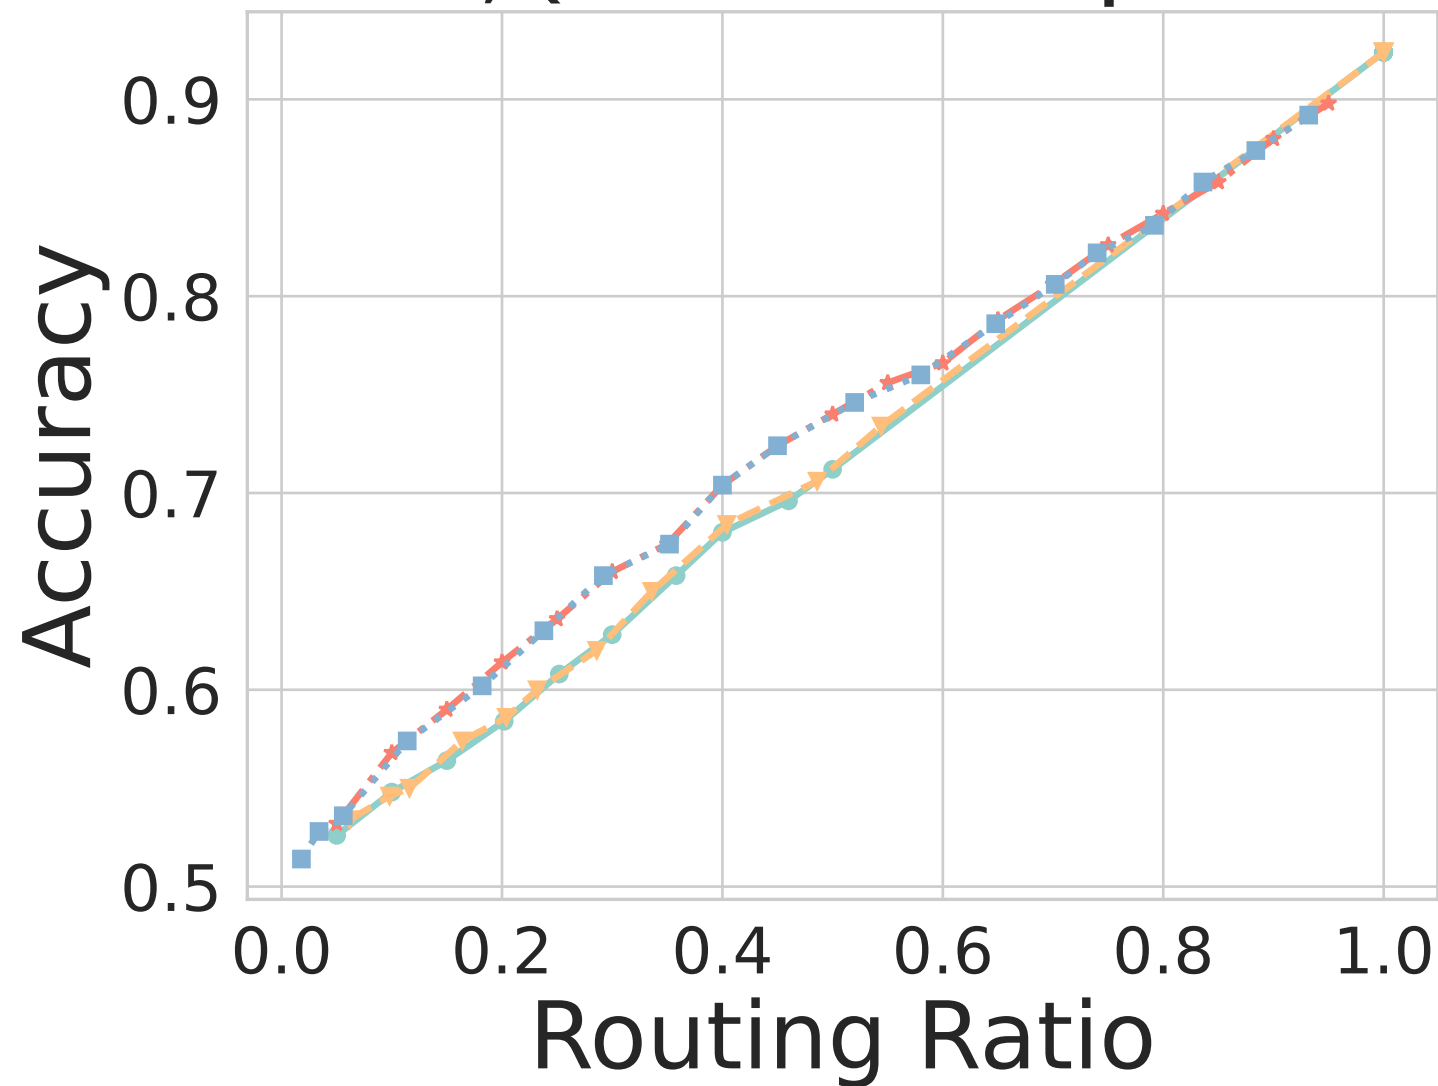

Supplement: supplementary_material [file cali_down_mmlu_Qwen3-0.6B_deepseek-reasoner.pdf › Routing_SLM_LLMs/Proxy_routing_prediction/to_deepseek-reasoner/mmlu_as_downstream/cali_down_mmlu_Qwen3-0.6B_deepseek-reasoner.pdf]

**MMLU, Qwen3-1.7B to DeepSeek-R1**

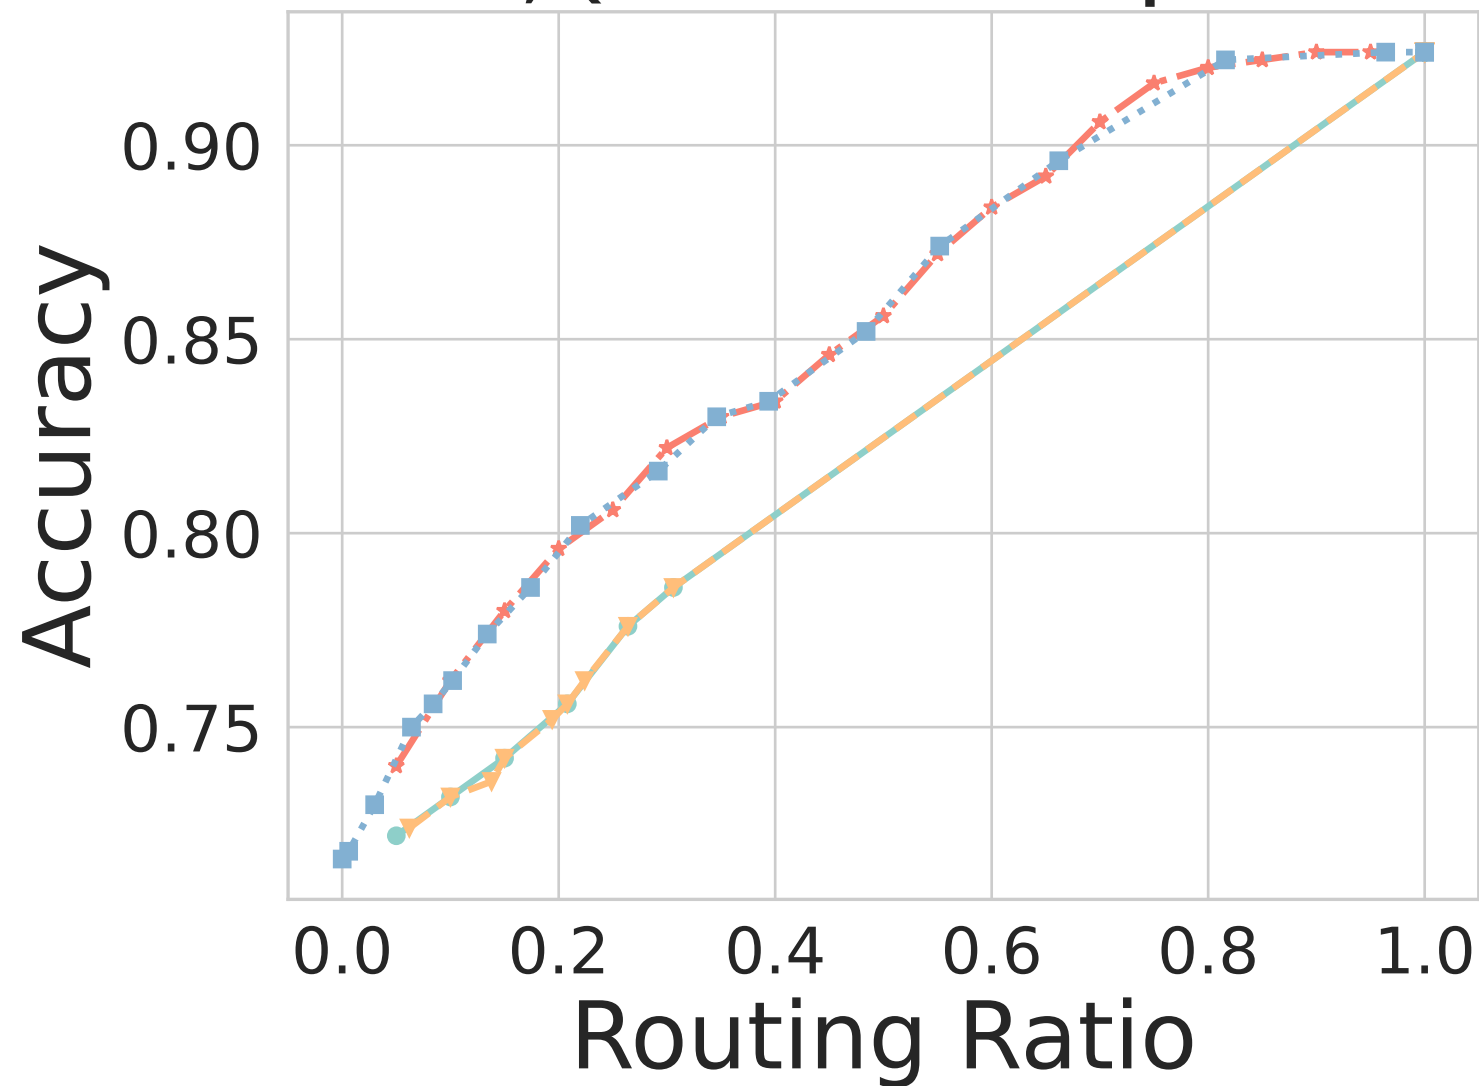

Supplement: supplementary_material [file cali_down_mmlu_Qwen3-1.7B_deepseek-reasoner.pdf › Routing_SLM_LLMs/Proxy_routing_prediction/to_deepseek-reasoner/mmlu_as_downstream/cali_down_mmlu_Qwen3-1.7B_deepseek-reasoner.pdf]

**MMLU, Qwen3-4B to DeepSeek-R1**

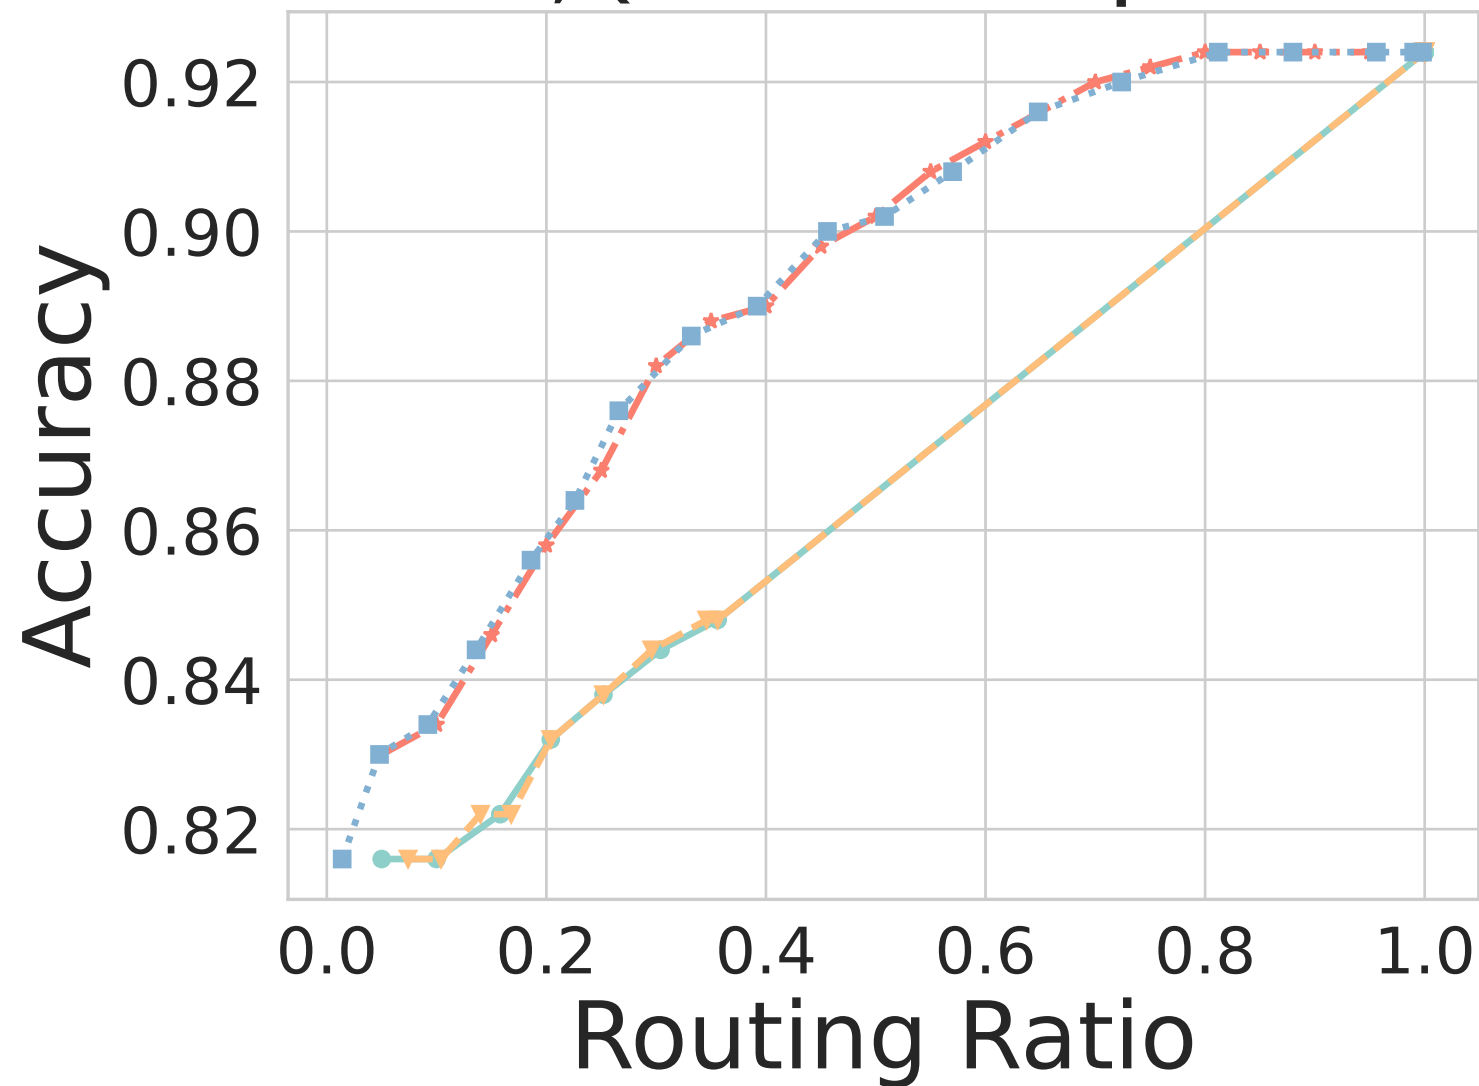

Supplement: supplementary_material [file cali_down_mmlu_Qwen3-4B_deepseek-reasoner.pdf › Routing_SLM_LLMs/Proxy_routing_prediction/to_deepseek-reasoner/mmlu_as_downstream/cali_down_mmlu_Qwen3-4B_deepseek-reasoner.pdf]

**MMLU, granite-3.1-8b to DeepSeek-R1**

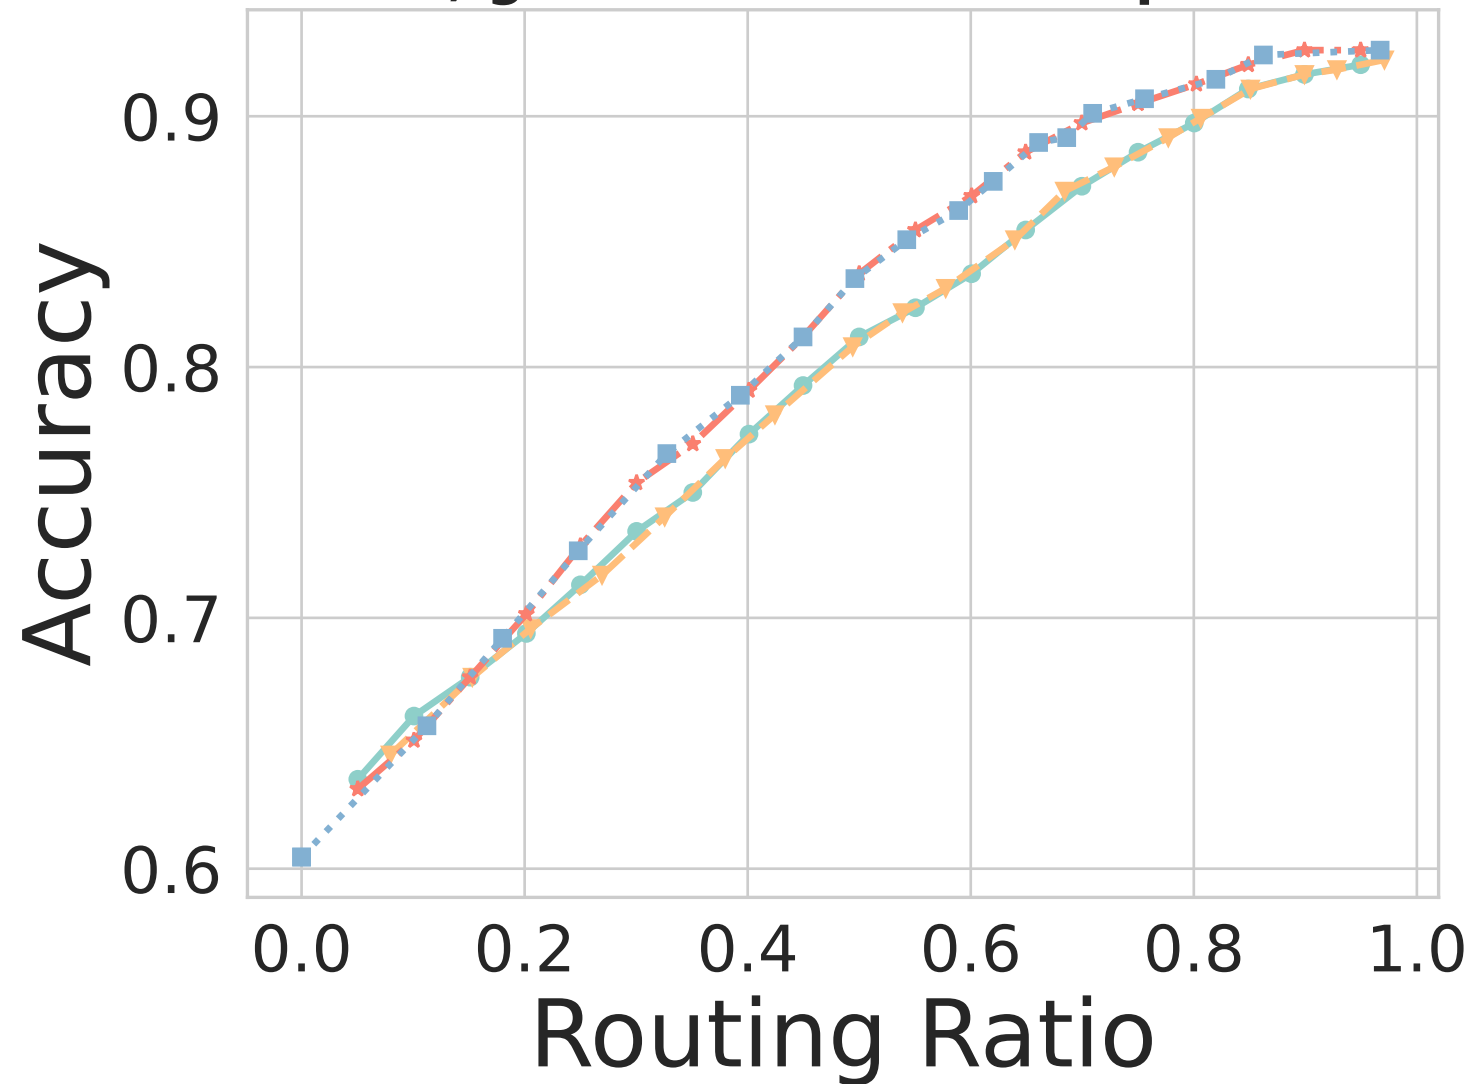

Supplement: supplementary_material [file cali_down_mmlu_granite-3.1-8b_deepseek-reasoner.pdf › Routing_SLM_LLMs/Proxy_routing_prediction/to_deepseek-reasoner/mmlu_as_downstream/cali_down_mmlu_granite-3.1-8b_deepseek-reasoner.pdf]

**MMLU, llama-3.1-8b to DeepSeek-R1**

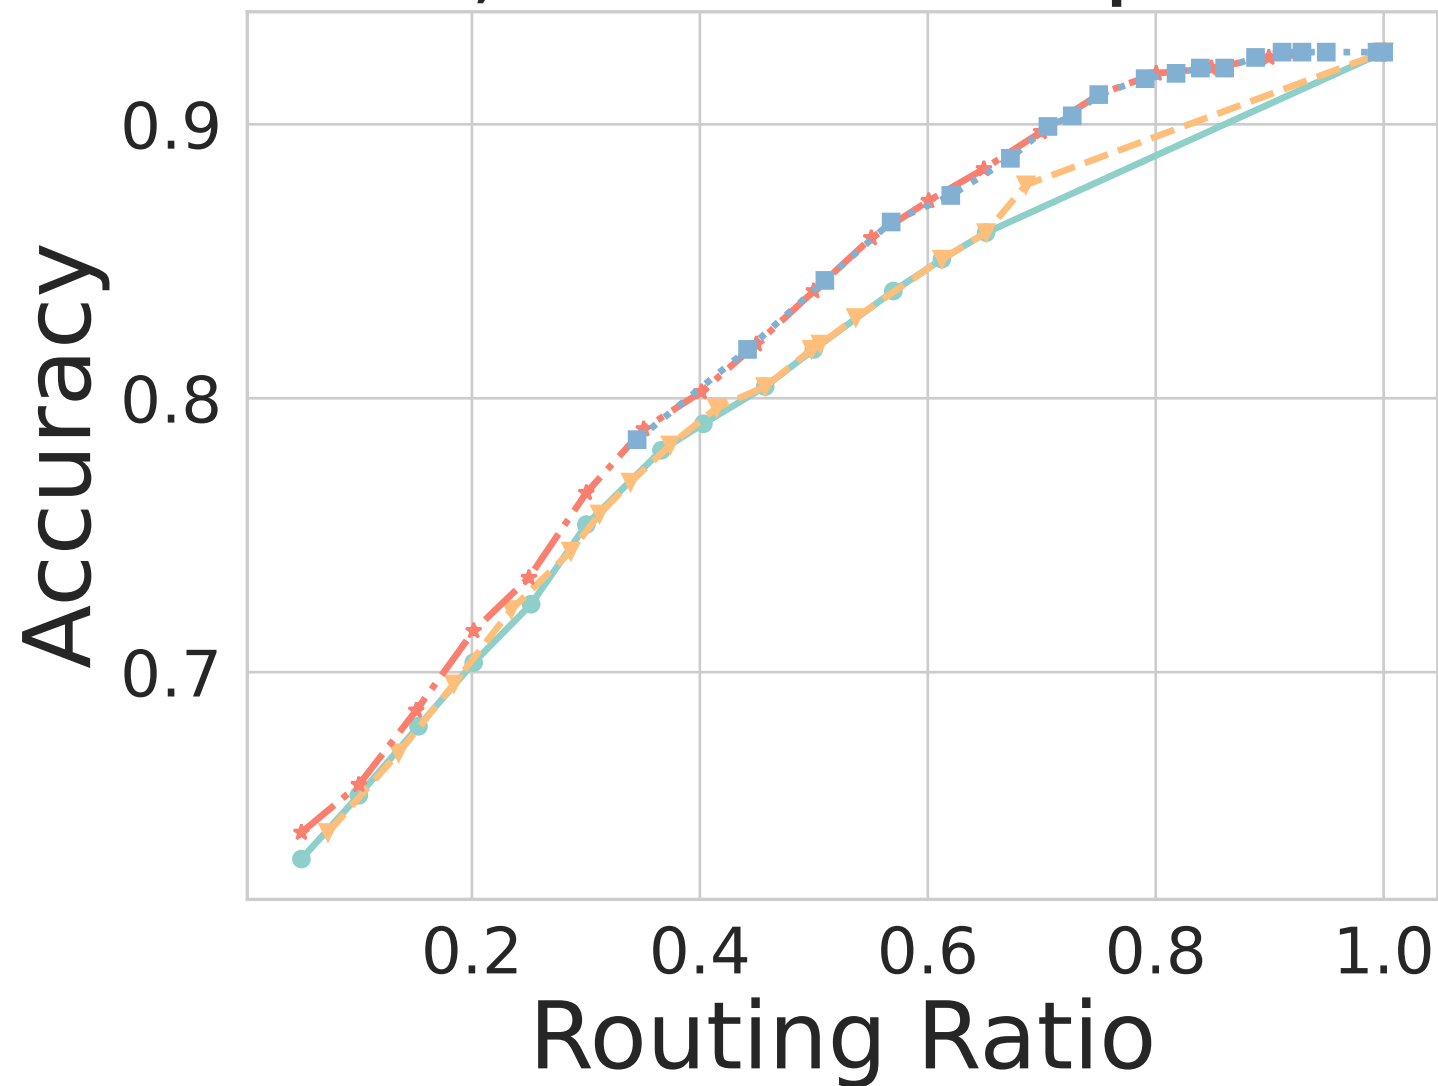

Supplement: supplementary_material [file cali_down_mmlu_llama-3.1-8b_deepseek-reasoner.pdf › Routing_SLM_LLMs/Proxy_routing_prediction/to_deepseek-reasoner/mmlu_as_downstream/cali_down_mmlu_llama-3.1-8b_deepseek-reasoner.pdf]

**MMLU, llama-3.2-1b to DeepSeek-R1**

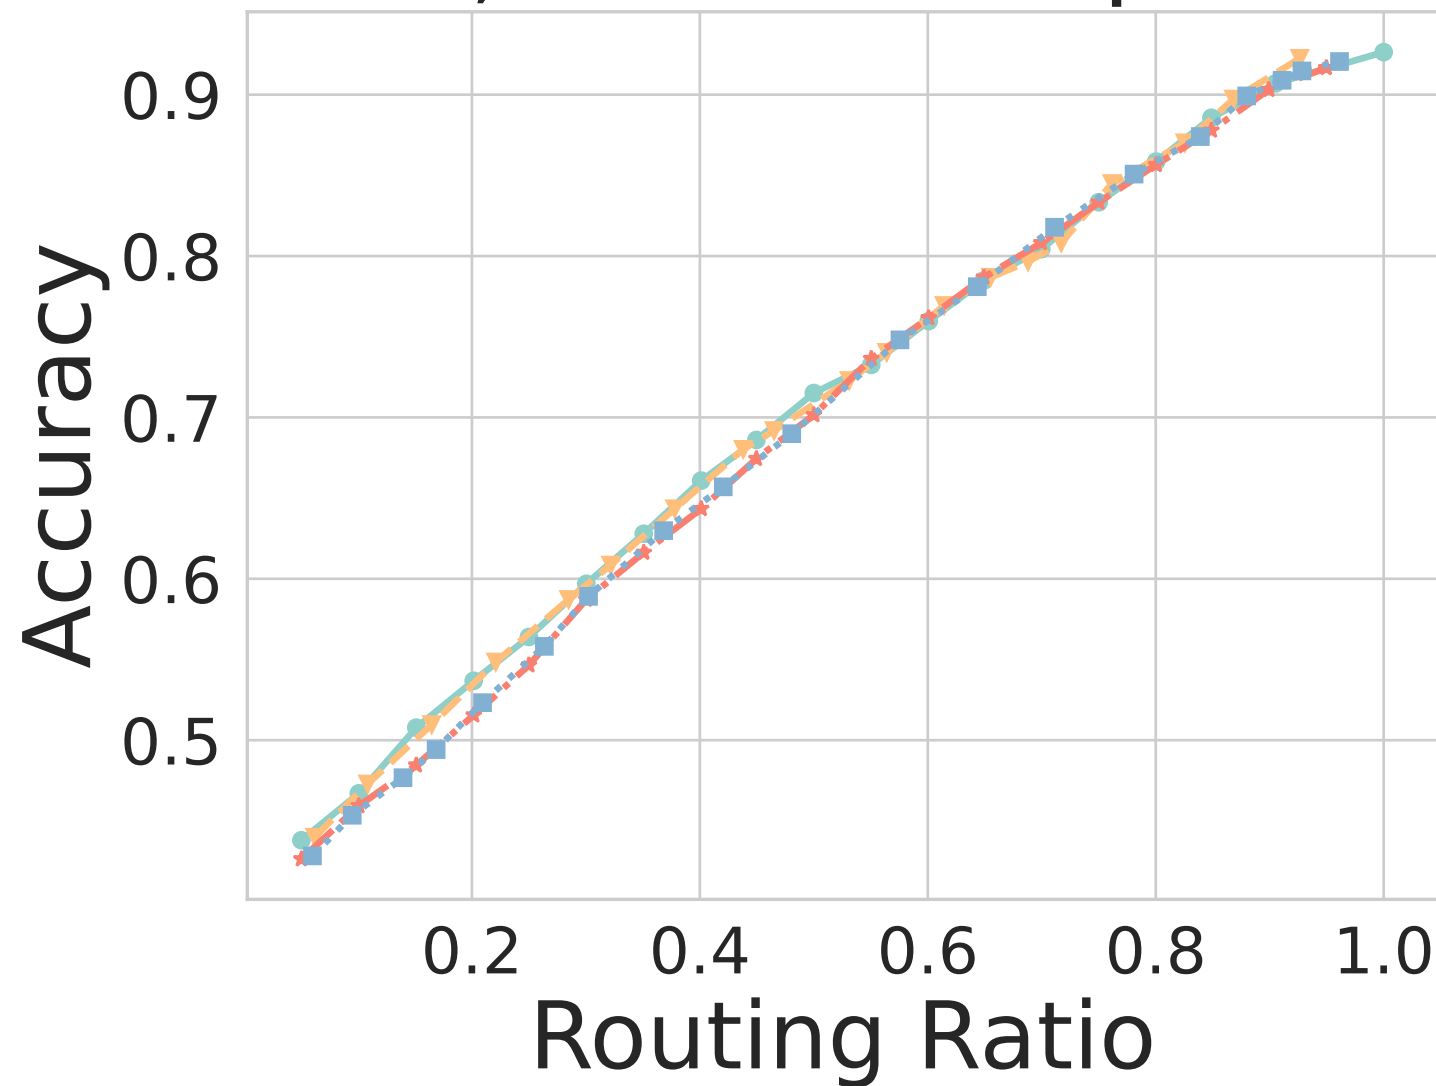

Supplement: supplementary_material [file cali_down_mmlu_llama-3.2-1b_deepseek-reasoner.pdf › Routing_SLM_LLMs/Proxy_routing_prediction/to_deepseek-reasoner/mmlu_as_downstream/cali_down_mmlu_llama-3.2-1b_deepseek-reasoner.pdf]

**MMLU, llama-3.2-3b to DeepSeek-R1**

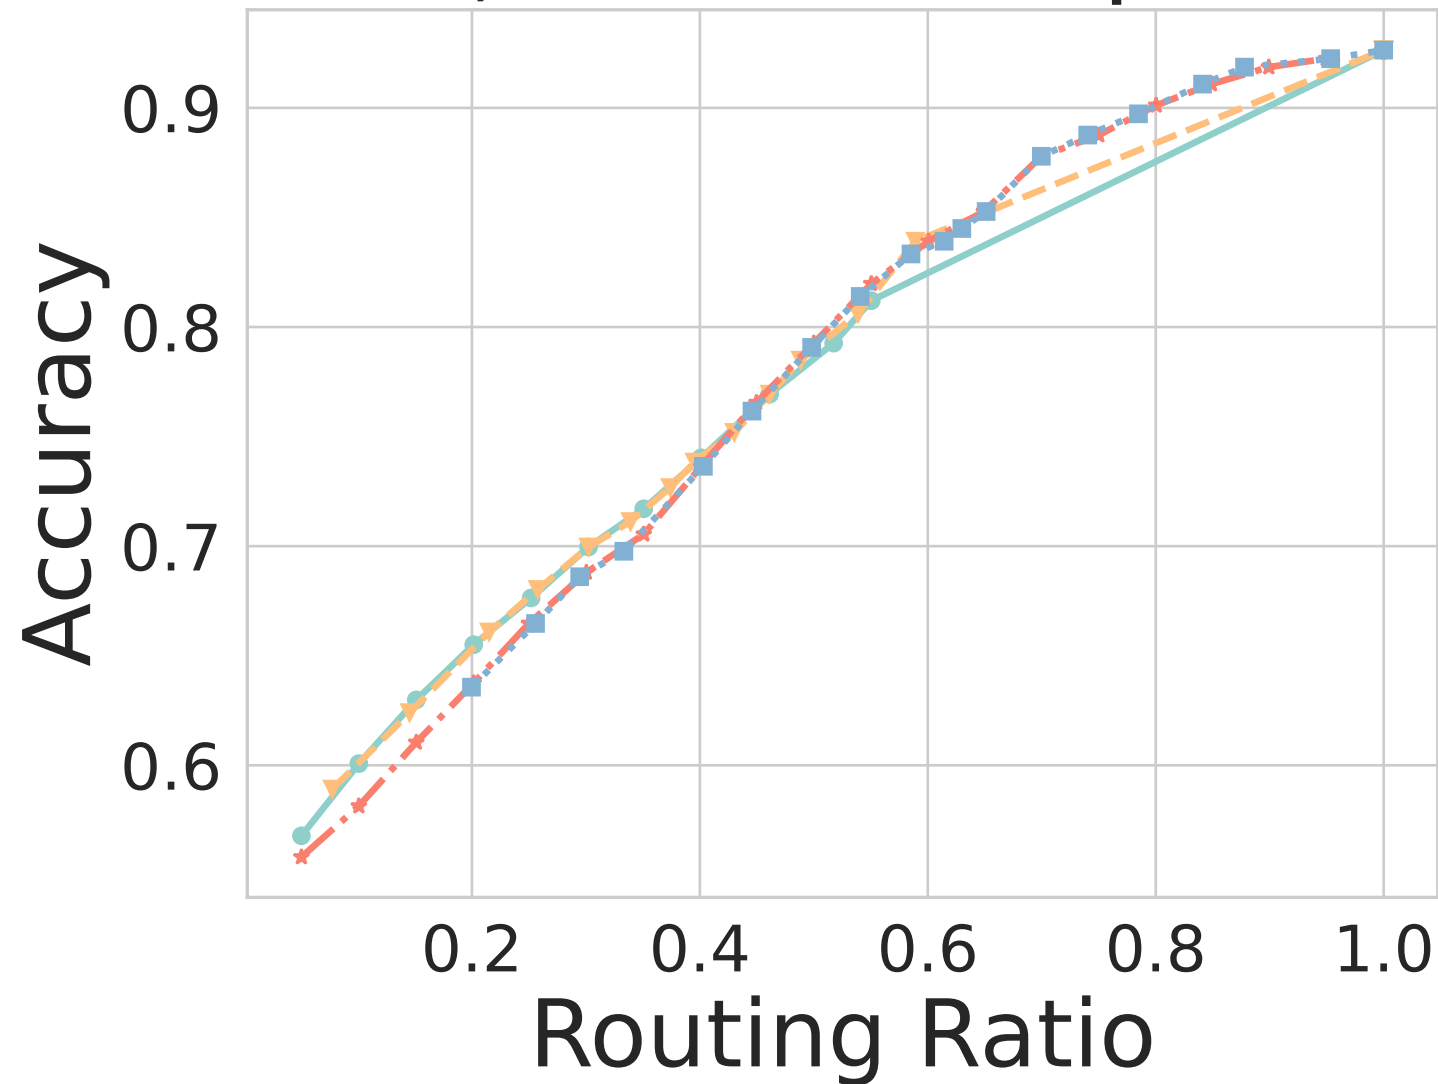

Supplement: supplementary_material [file cali_down_mmlu_llama-3.2-3b_deepseek-reasoner.pdf › Routing_SLM_LLMs/Proxy_routing_prediction/to_deepseek-reasoner/mmlu_as_downstream/cali_down_mmlu_llama-3.2-3b_deepseek-reasoner.pdf]

**MMLU, mistral-7b to DeepSeek-R1**

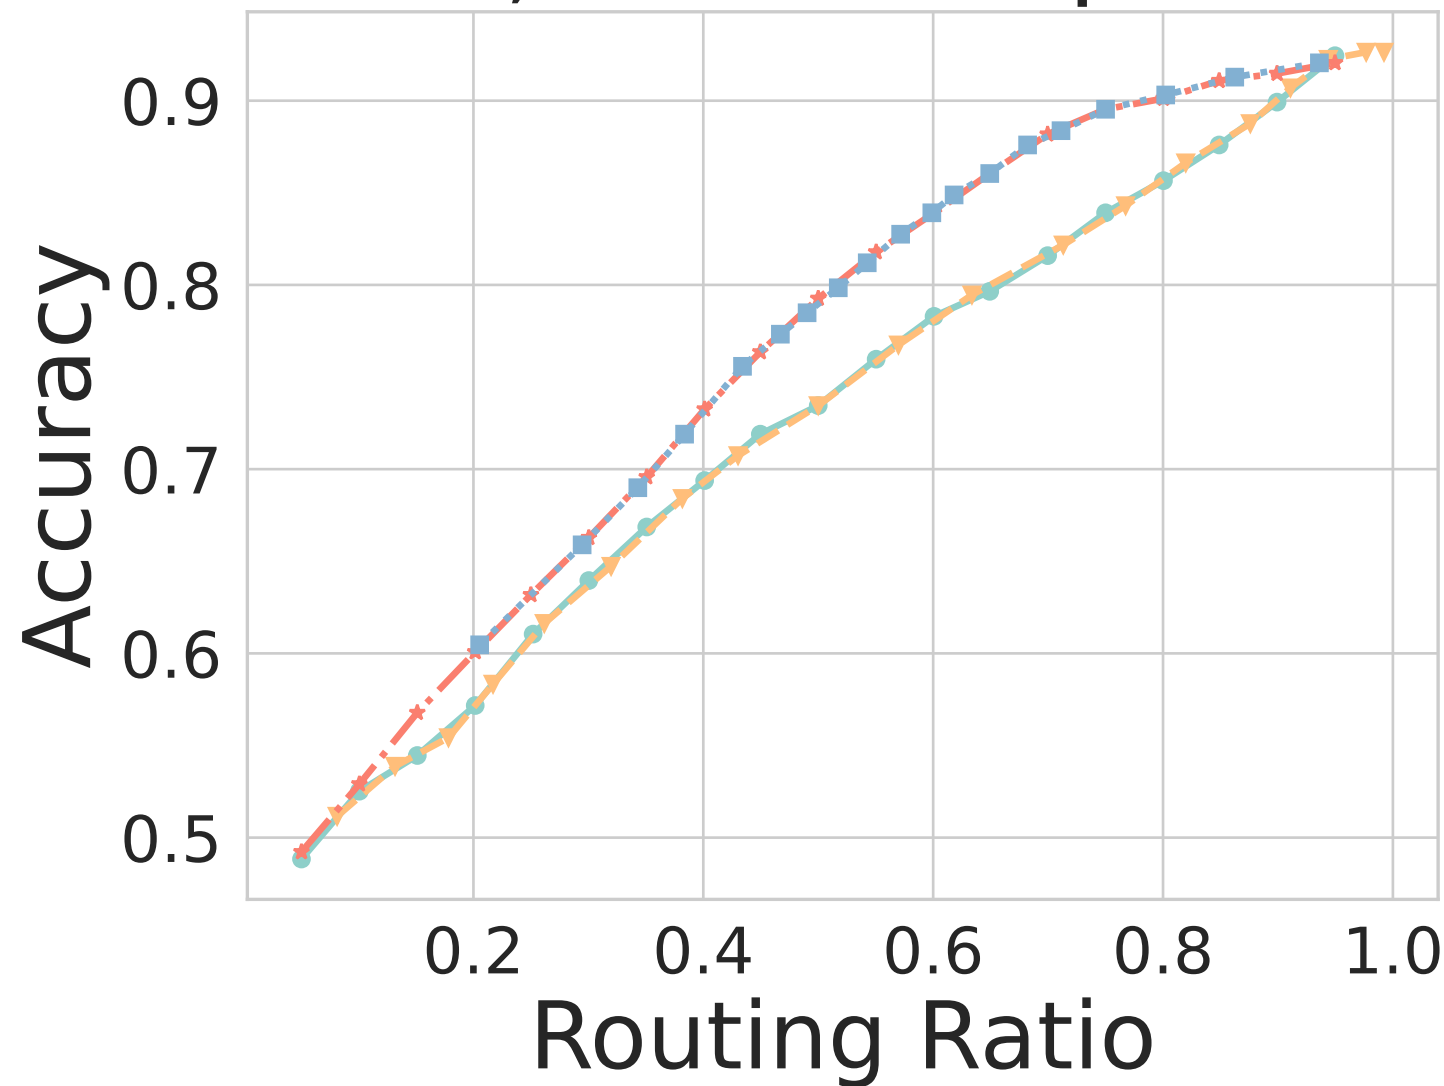

Supplement: supplementary_material [file cali_down_mmlu_mistral-7b_deepseek-reasoner.pdf › Routing_SLM_LLMs/Proxy_routing_prediction/to_deepseek-reasoner/mmlu_as_downstream/cali_down_mmlu_mistral-7b_deepseek-reasoner.pdf]

**MMLU, phi-3.5-mini to DeepSeek-R1**

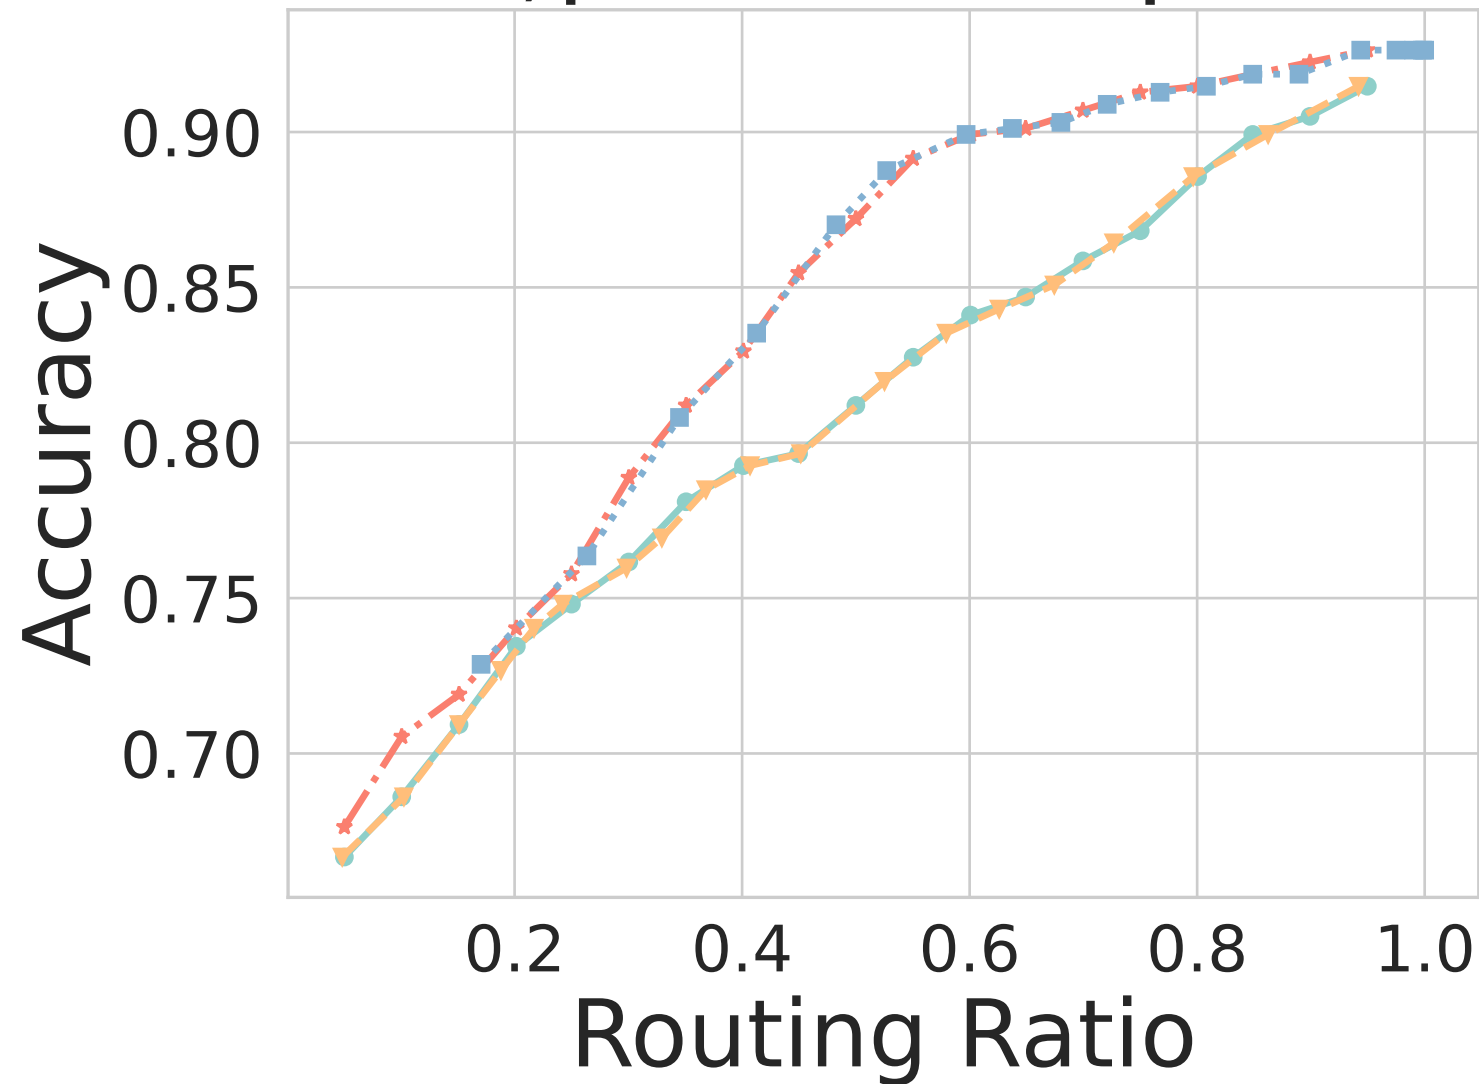

Supplement: supplementary_material [file cali_down_mmlu_phi-3.5-mini_deepseek-reasoner.pdf › Routing_SLM_LLMs/Proxy_routing_prediction/to_deepseek-reasoner/mmlu_as_downstream/cali_down_mmlu_phi-3.5-mini_deepseek-reasoner.pdf]

# MMLU, phi-4-mini-reasoning to DeepSeek-R1

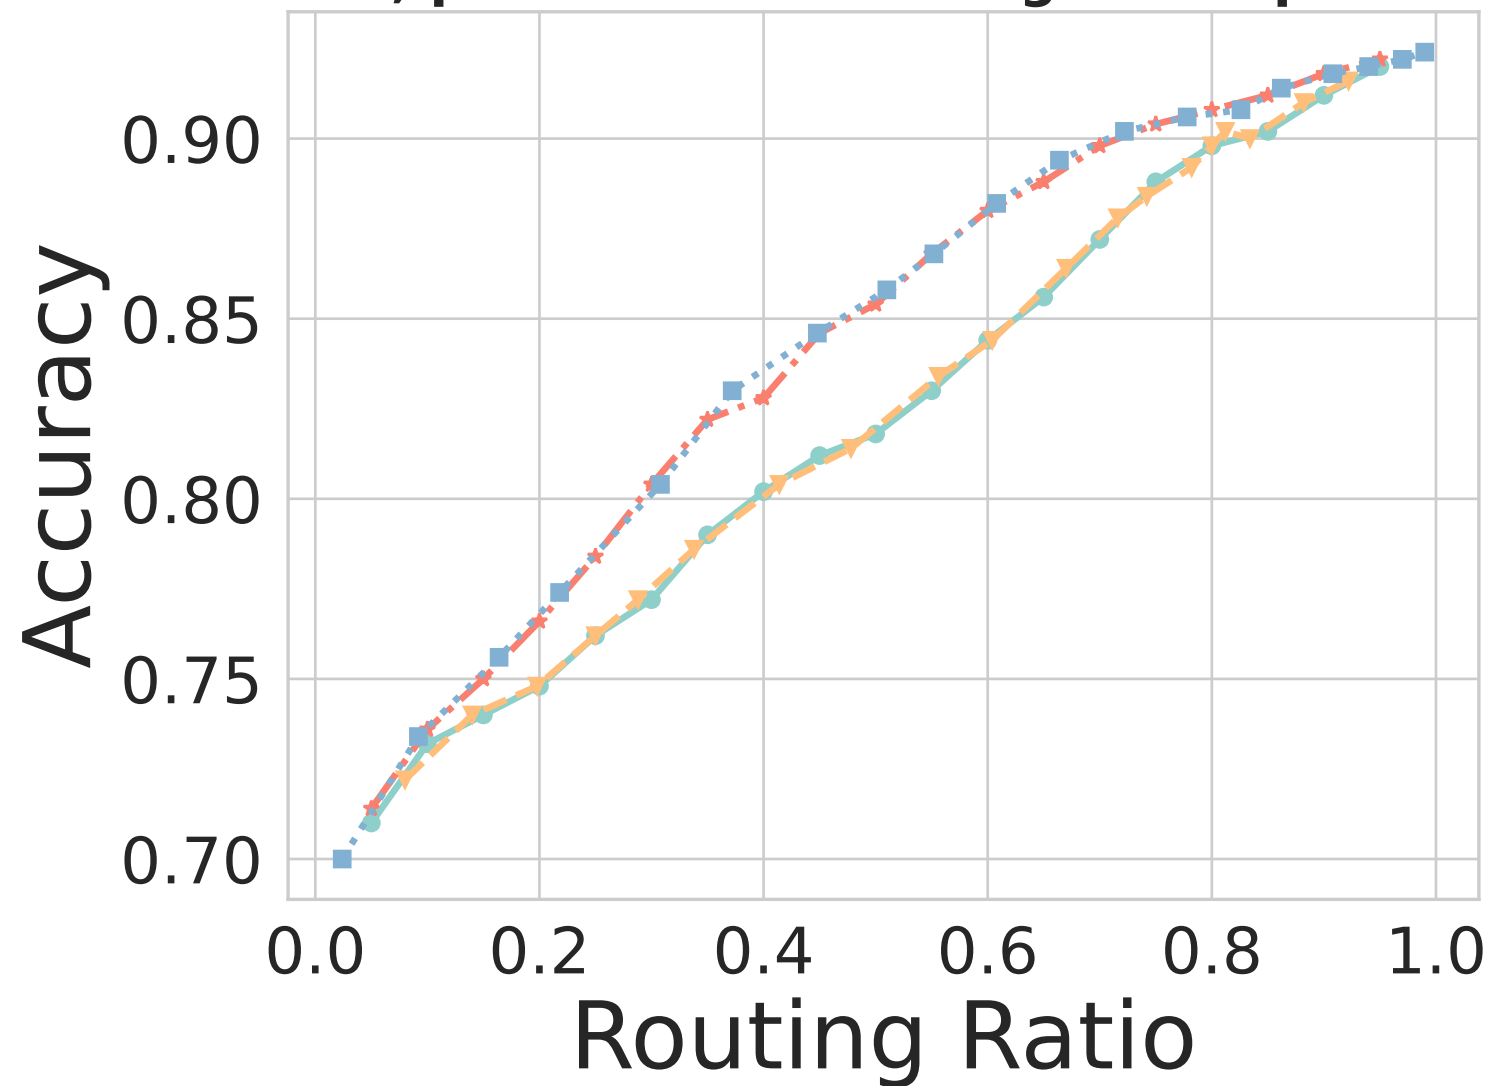

Supplement: supplementary_material [file cali_down_mmlu_phi-4-mini-reasoning_deepseek-reasoner.pdf › Routing_SLM_LLMs/Proxy_routing_prediction/to_deepseek-reasoner/mmlu_as_downstream/cali_down_mmlu_phi-4-mini-reasoning_deepseek-reasoner.pdf]

**MMLU, qwen-2.5-7b to DeepSeek-R1**

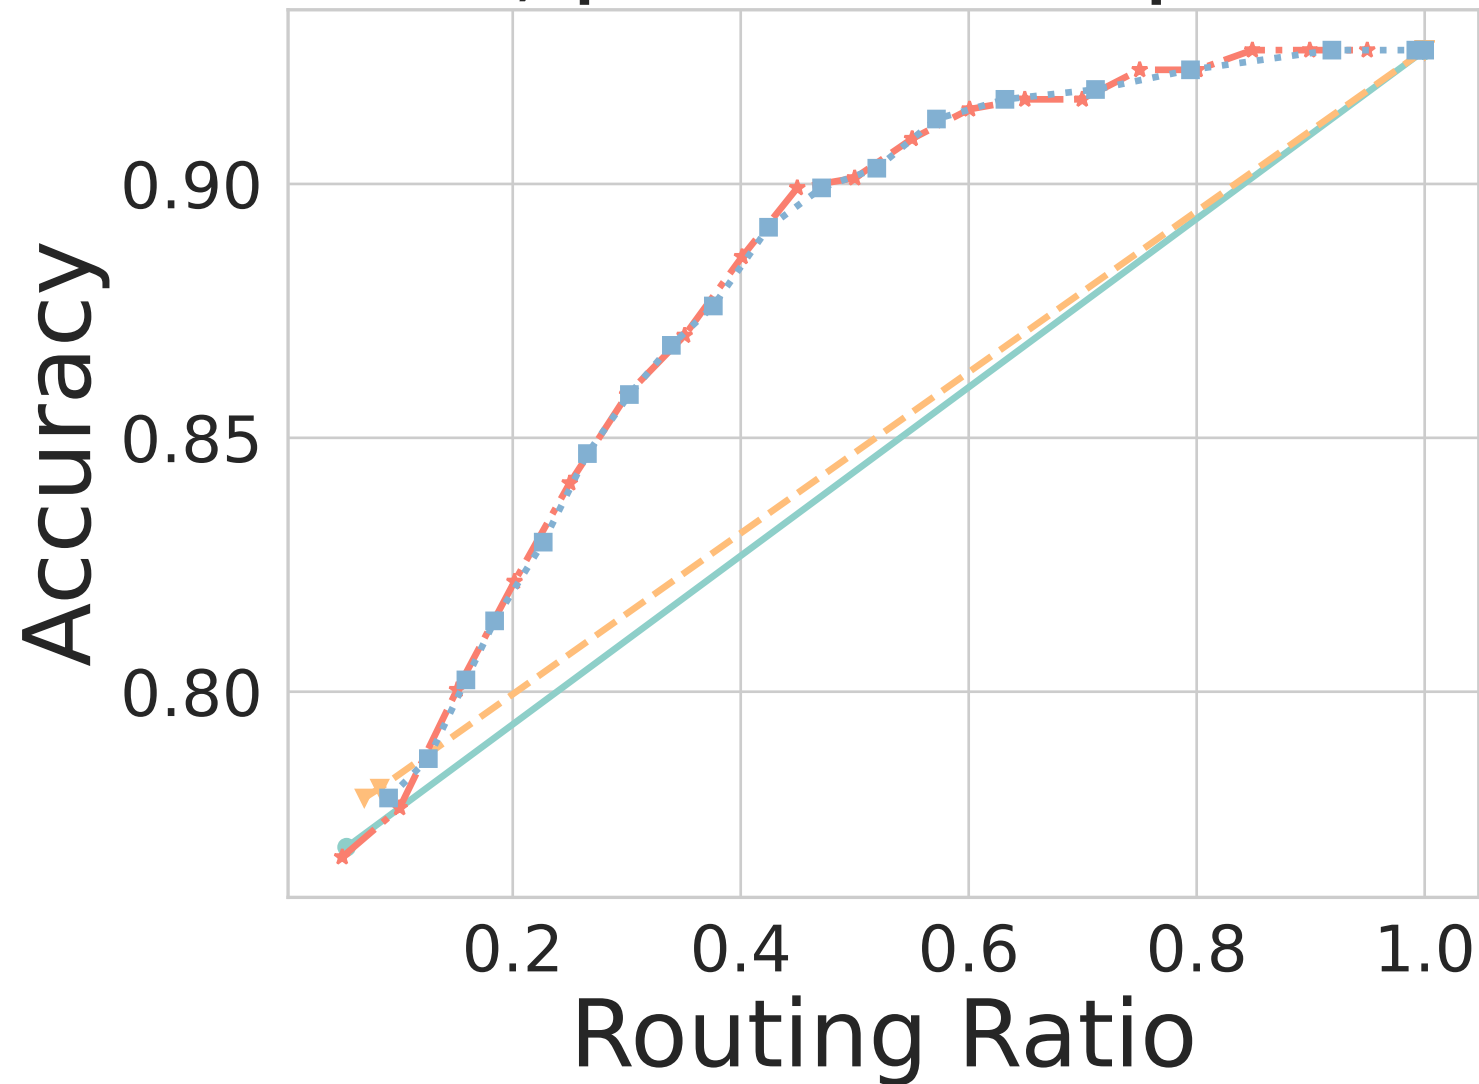

Supplement: supplementary_material [file cali_down_mmlu_qwen-2.5-7b_deepseek-reasoner.pdf › Routing_SLM_LLMs/Proxy_routing_prediction/to_deepseek-reasoner/mmlu_as_downstream/cali_down_mmlu_qwen-2.5-7b_deepseek-reasoner.pdf]

**MMLU, rwkv to DeepSeek-R1**

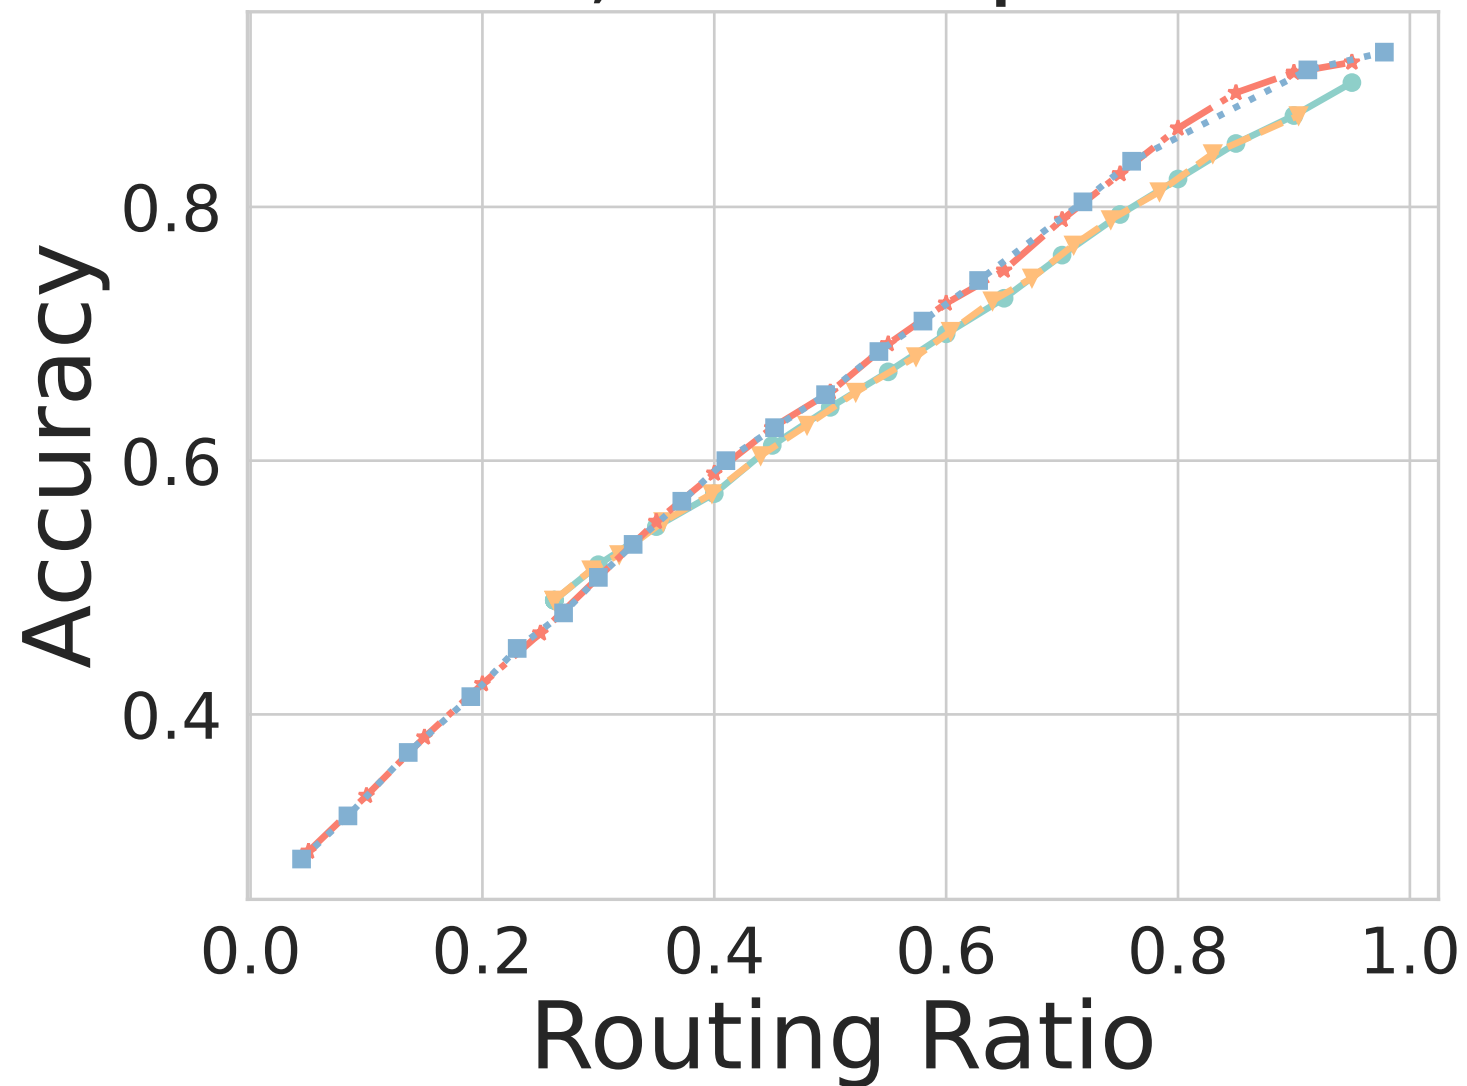

Supplement: supplementary_material [file cali_down_mmlu_rwkv_deepseek-reasoner.pdf › Routing_SLM_LLMs/Proxy_routing_prediction/to_deepseek-reasoner/mmlu_as_downstream/cali_down_mmlu_rwkv_deepseek-reasoner.pdf]

**MultiArith, Qwen3-0.6B to DeepSeek-R1**

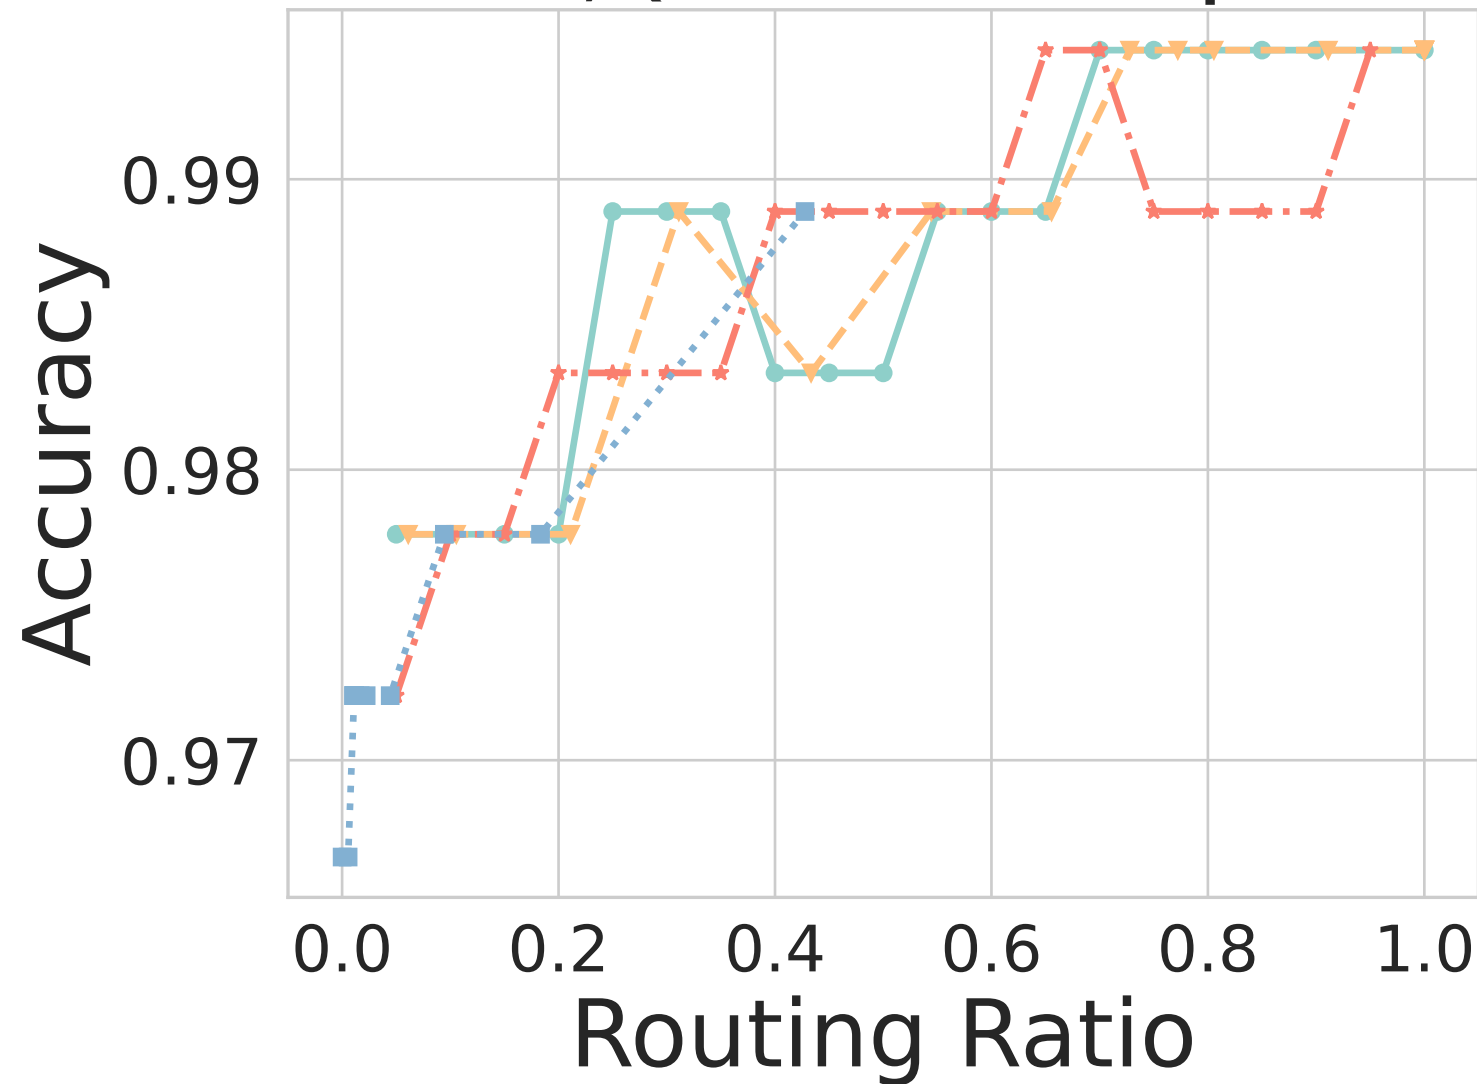

Supplement: supplementary_material [file cali_down_multiarith_Qwen3-0.6B_deepseek-reasoner.pdf › Routing_SLM_LLMs/Proxy_routing_prediction/to_deepseek-reasoner/multiarith_as_downstream/cali_down_multiarith_Qwen3-0.6B_deepseek-reasoner.pdf]

**MultiArith, Qwen3-1.7B to DeepSeek-R1**

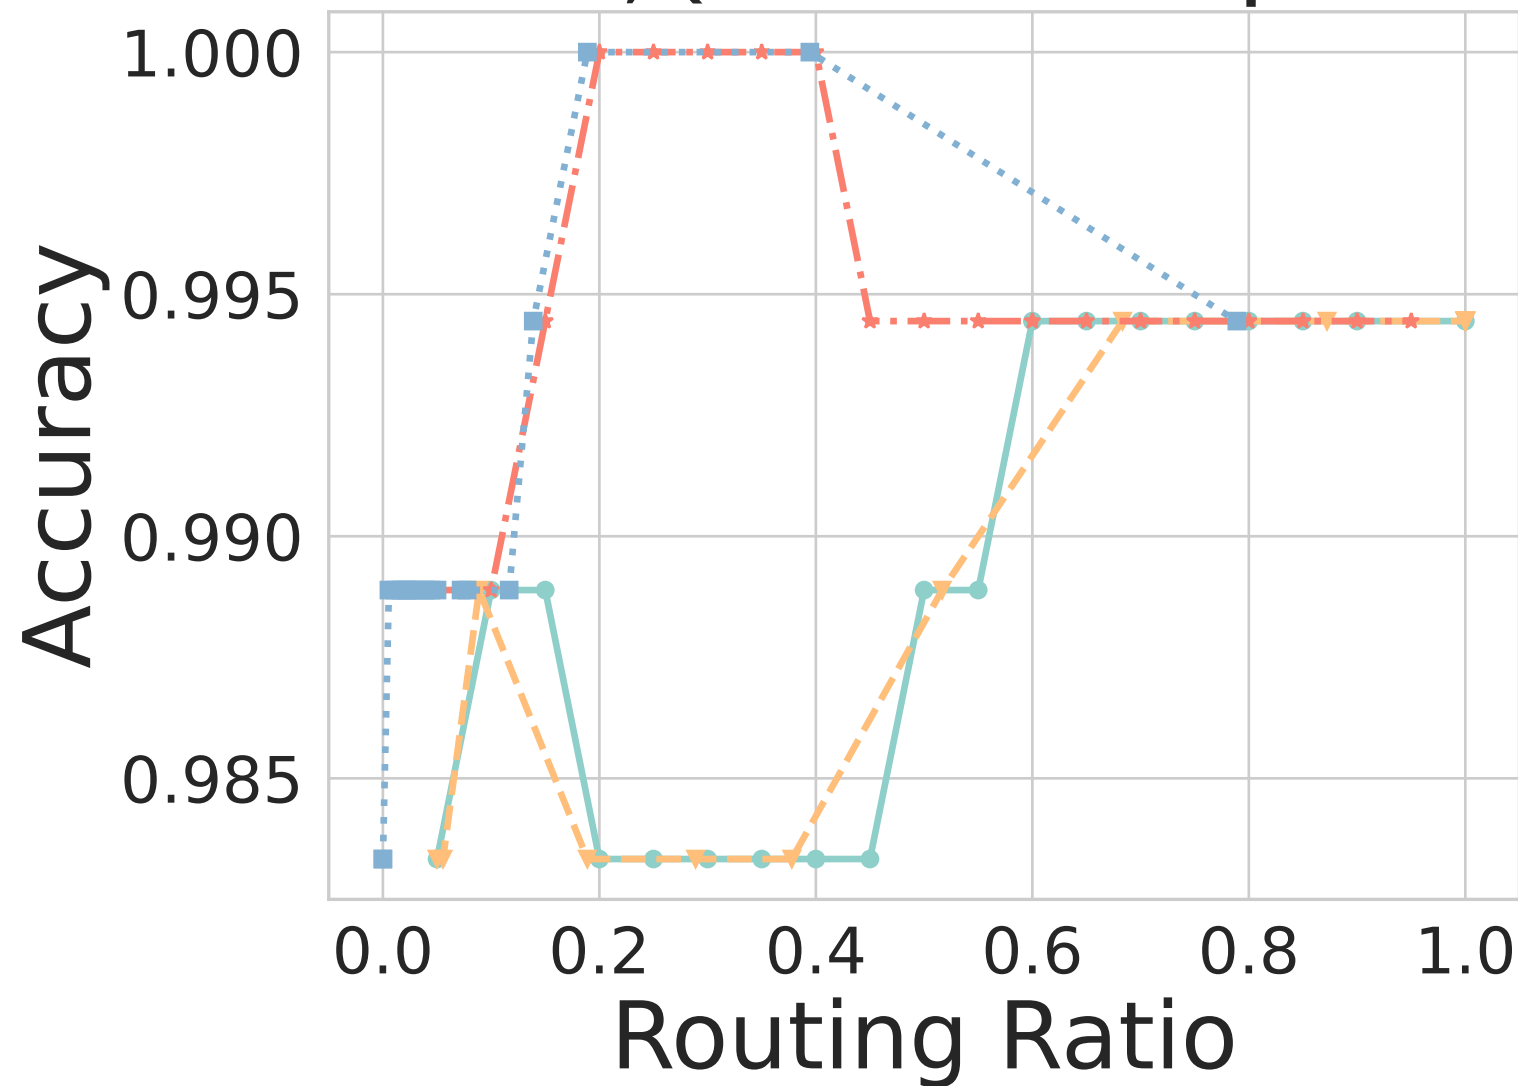

Supplement: supplementary_material [file cali_down_multiarith_Qwen3-1.7B_deepseek-reasoner.pdf › Routing_SLM_LLMs/Proxy_routing_prediction/to_deepseek-reasoner/multiarith_as_downstream/cali_down_multiarith_Qwen3-1.7B_deepseek-reasoner.pdf]

MultiArith, Qwen3-4B to DeepSeek-R1

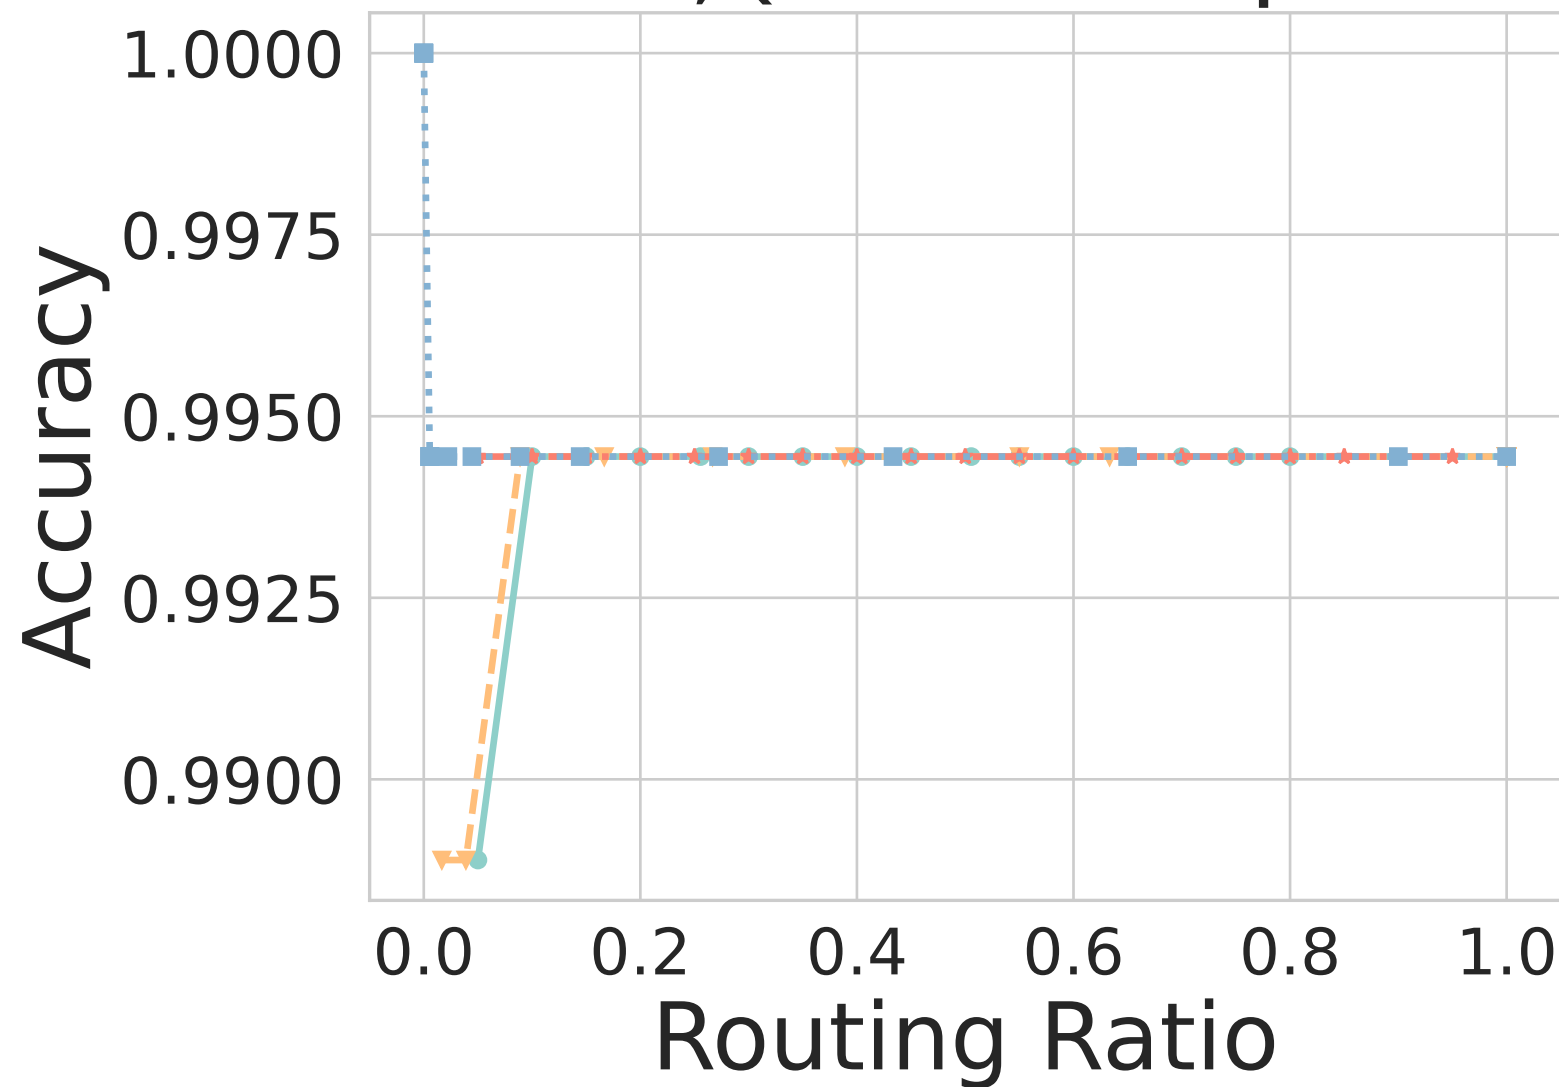

Supplement: supplementary_material [file cali_down_multiarith_Qwen3-4B_deepseek-reasoner.pdf › Routing_SLM_LLMs/Proxy_routing_prediction/to_deepseek-reasoner/multiarith_as_downstream/cali_down_multiarith_Qwen3-4B_deepseek-reasoner.pdf]

**MultiArith, granite-3.1-8b to DeepSeek-R1**

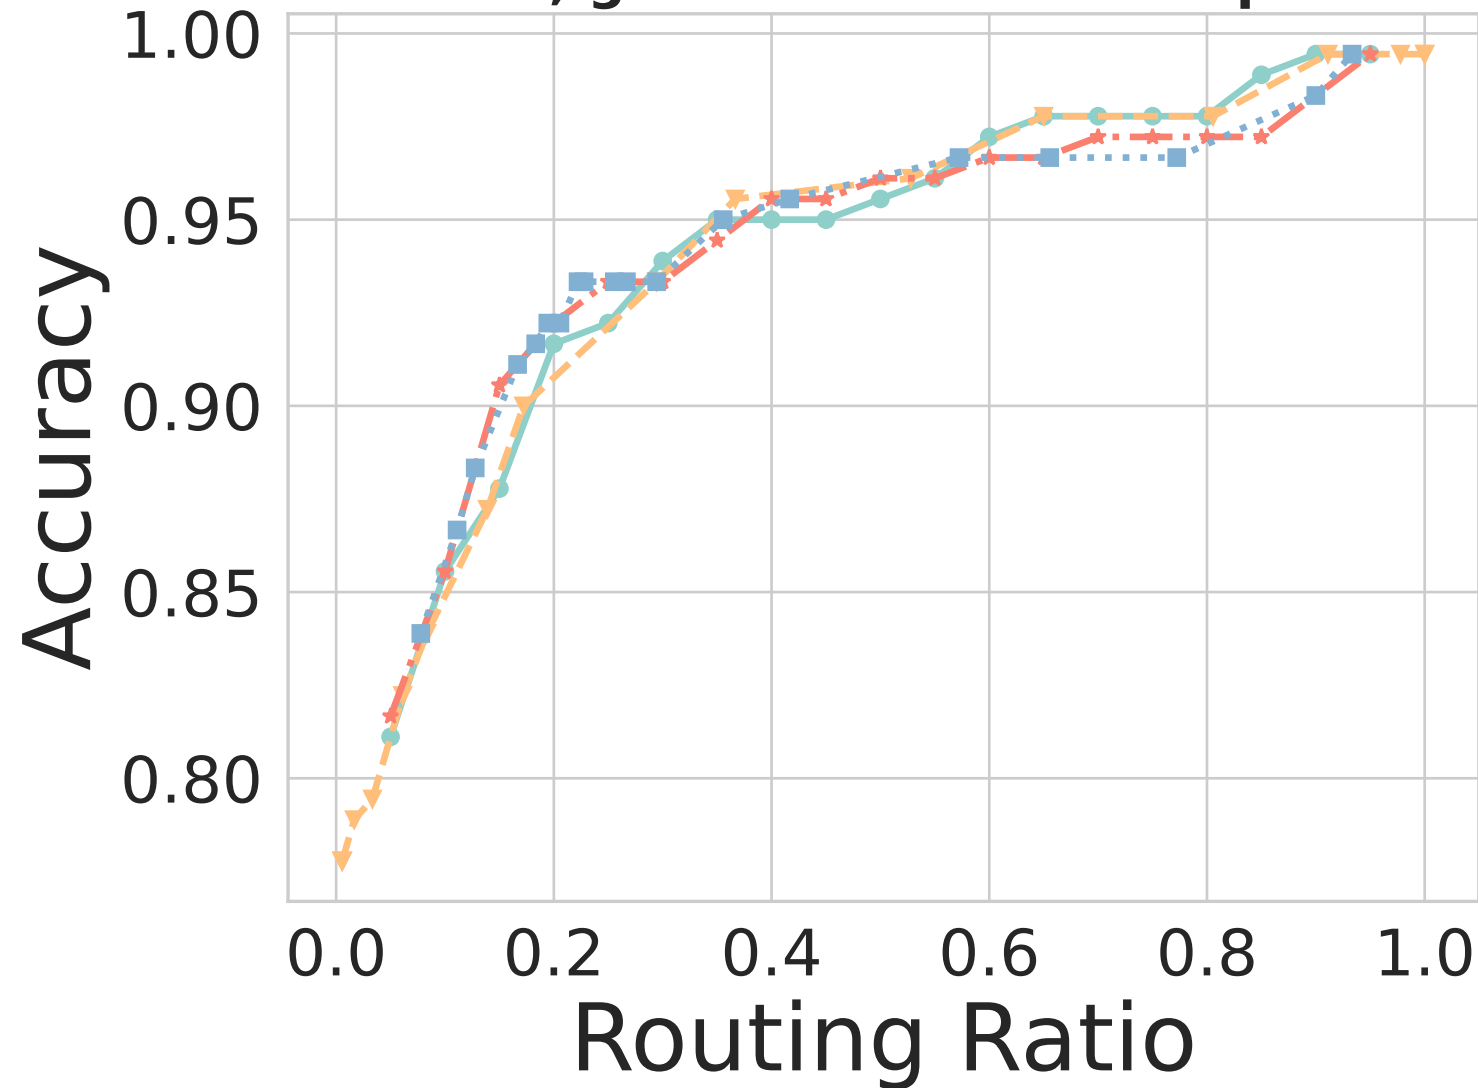

Supplement: supplementary_material [file cali_down_multiarith_granite-3.1-8b_deepseek-reasoner.pdf › Routing_SLM_LLMs/Proxy_routing_prediction/to_deepseek-reasoner/multiarith_as_downstream/cali_down_multiarith_granite-3.1-8b_deepseek-reasoner.pdf]

**MultiArith, llama-3.1-8b to DeepSeek-R1**

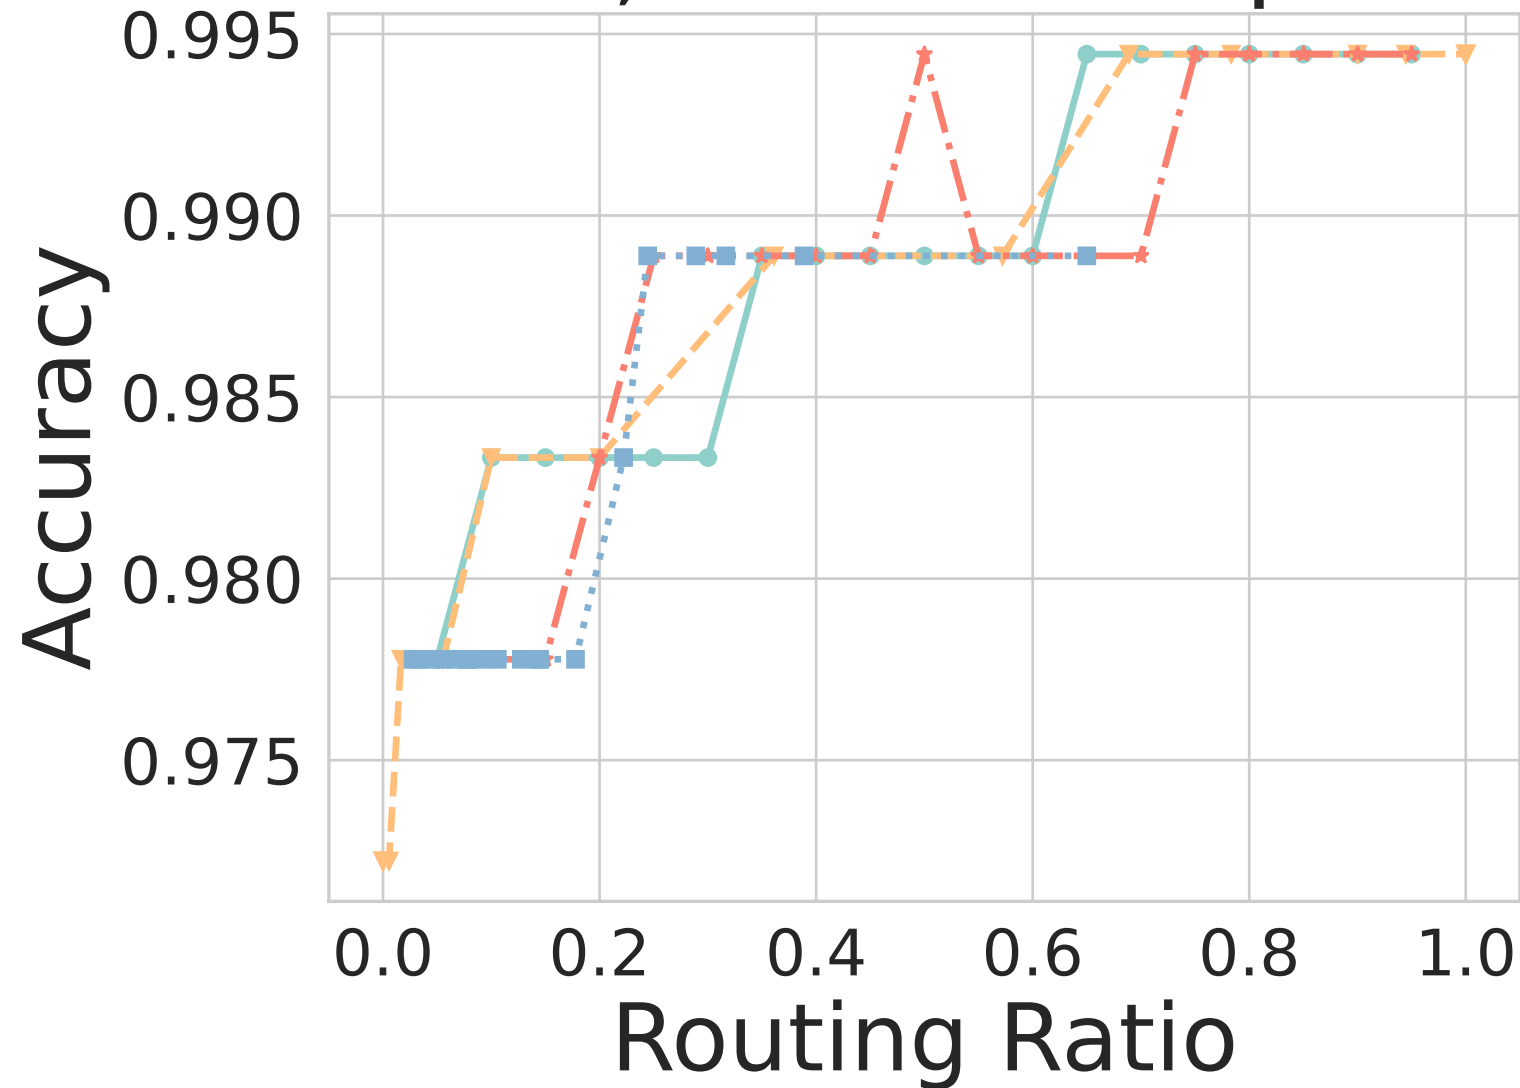

Supplement: supplementary_material [file cali_down_multiarith_llama-3.1-8b_deepseek-reasoner.pdf › Routing_SLM_LLMs/Proxy_routing_prediction/to_deepseek-reasoner/multiarith_as_downstream/cali_down_multiarith_llama-3.1-8b_deepseek-reasoner.pdf]

# MultiArith, llama-3.2-1b to DeepSeek-R1

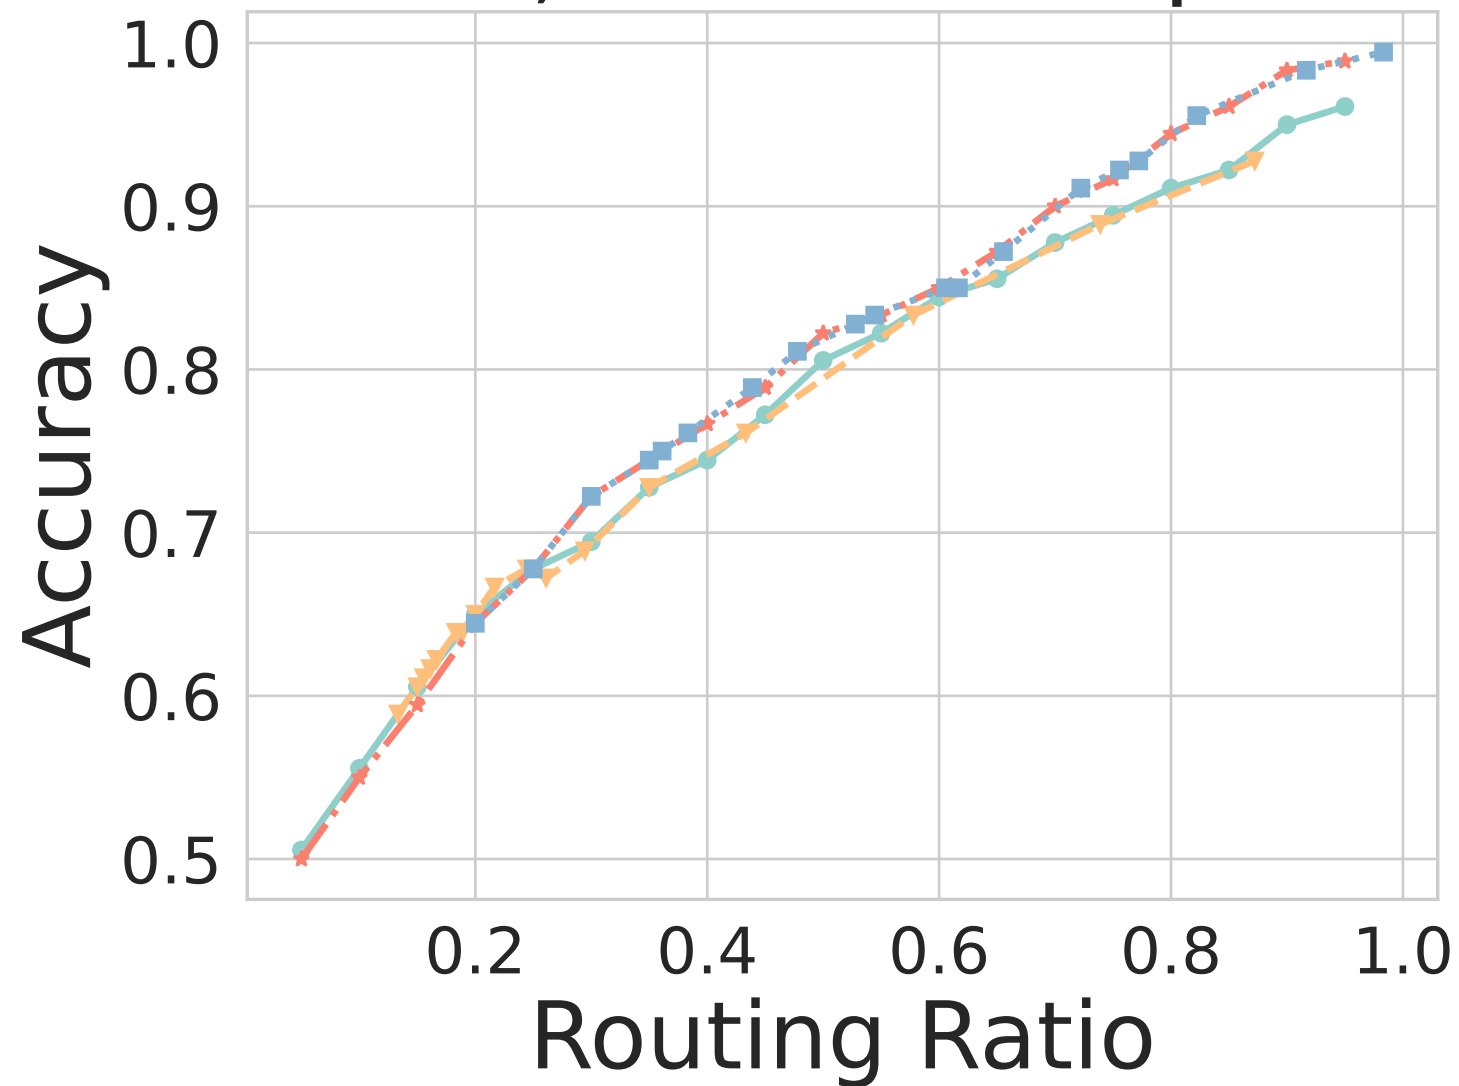

Supplement: supplementary_material [file cali_down_multiarith_llama-3.2-1b_deepseek-reasoner.pdf › Routing_SLM_LLMs/Proxy_routing_prediction/to_deepseek-reasoner/multiarith_as_downstream/cali_down_multiarith_llama-3.2-1b_deepseek-reasoner.pdf]

**MultiArith, llama-3.2-3b to DeepSeek-R1**

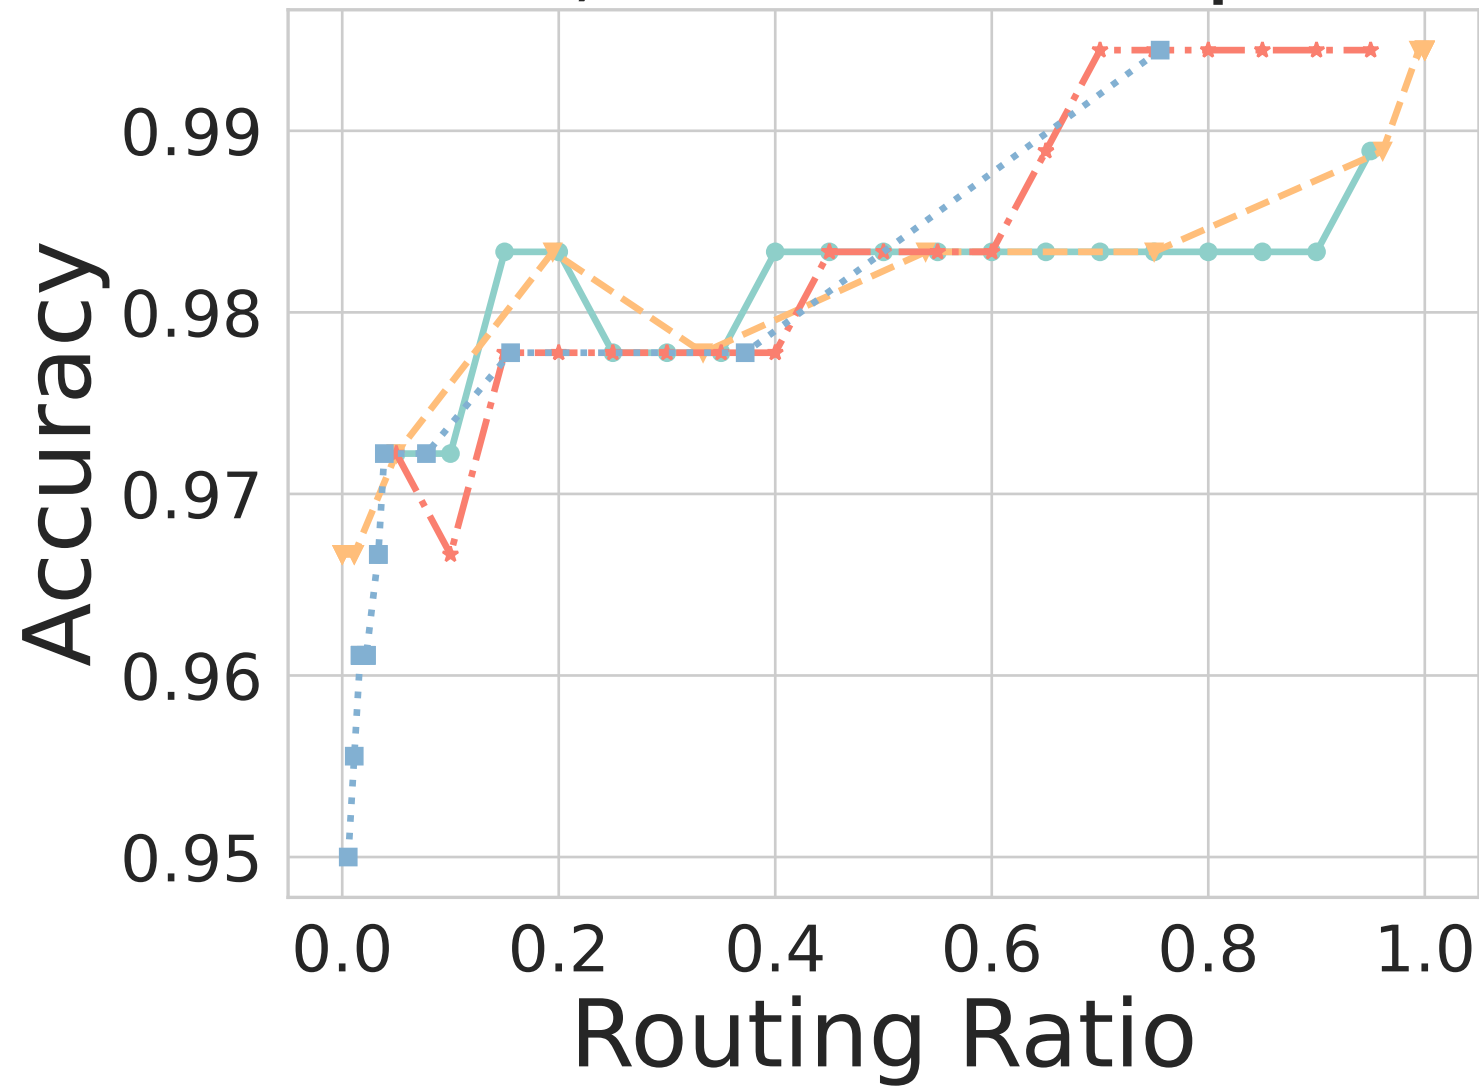

Supplement: supplementary_material [file cali_down_multiarith_llama-3.2-3b_deepseek-reasoner.pdf › Routing_SLM_LLMs/Proxy_routing_prediction/to_deepseek-reasoner/multiarith_as_downstream/cali_down_multiarith_llama-3.2-3b_deepseek-reasoner.pdf]

**MultiArith, mistral-7b to DeepSeek-R1**

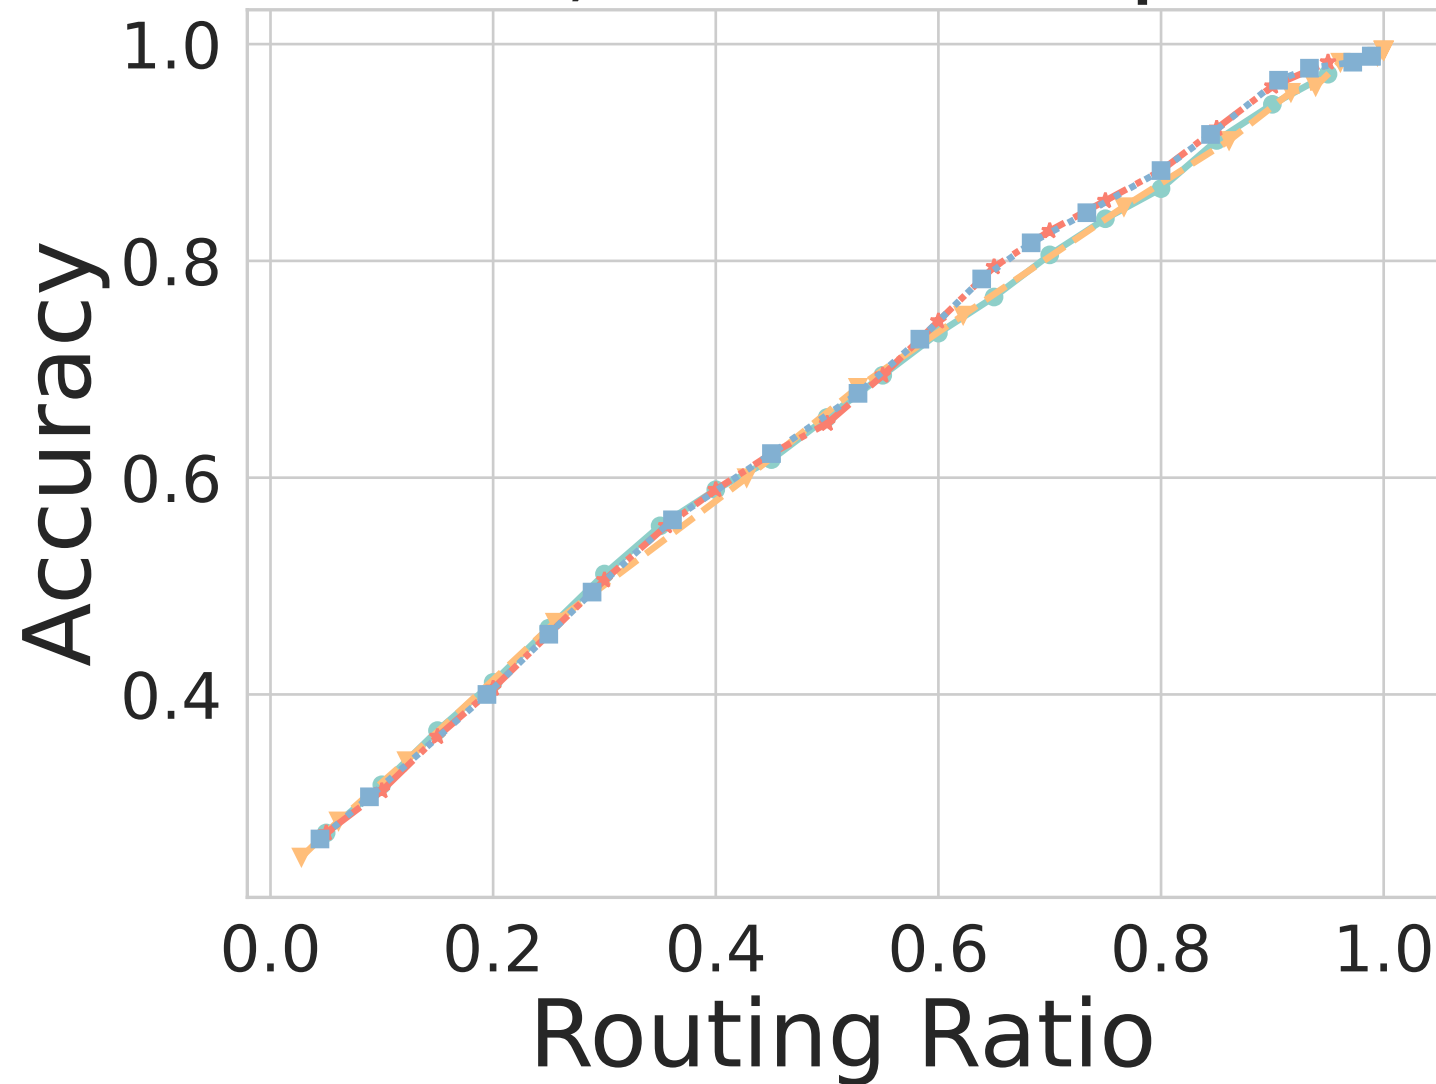

Supplement: supplementary_material [file cali_down_multiarith_mistral-7b_deepseek-reasoner.pdf › Routing_SLM_LLMs/Proxy_routing_prediction/to_deepseek-reasoner/multiarith_as_downstream/cali_down_multiarith_mistral-7b_deepseek-reasoner.pdf]

**MultiArith, phi-3.5-mini to DeepSeek-R1**

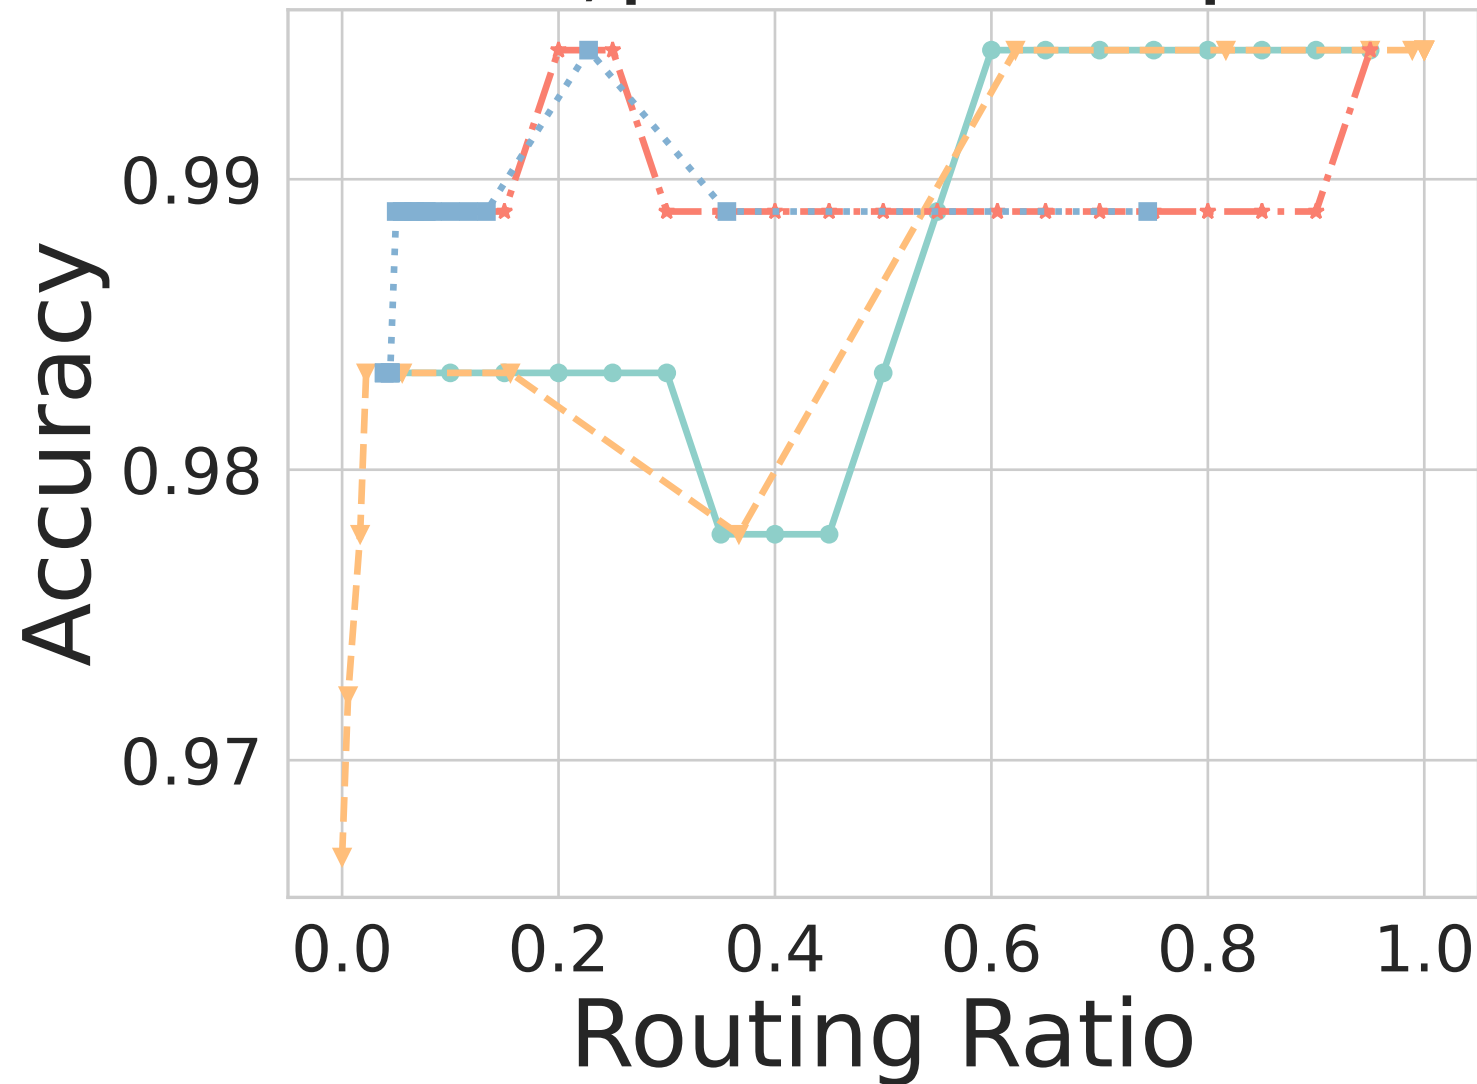

Supplement: supplementary_material [file cali_down_multiarith_phi-3.5-mini_deepseek-reasoner.pdf › Routing_SLM_LLMs/Proxy_routing_prediction/to_deepseek-reasoner/multiarith_as_downstream/cali_down_multiarith_phi-3.5-mini_deepseek-reasoner.pdf]

# MultiArith, phi-4-mini-reasoning to DeepSeek-R1

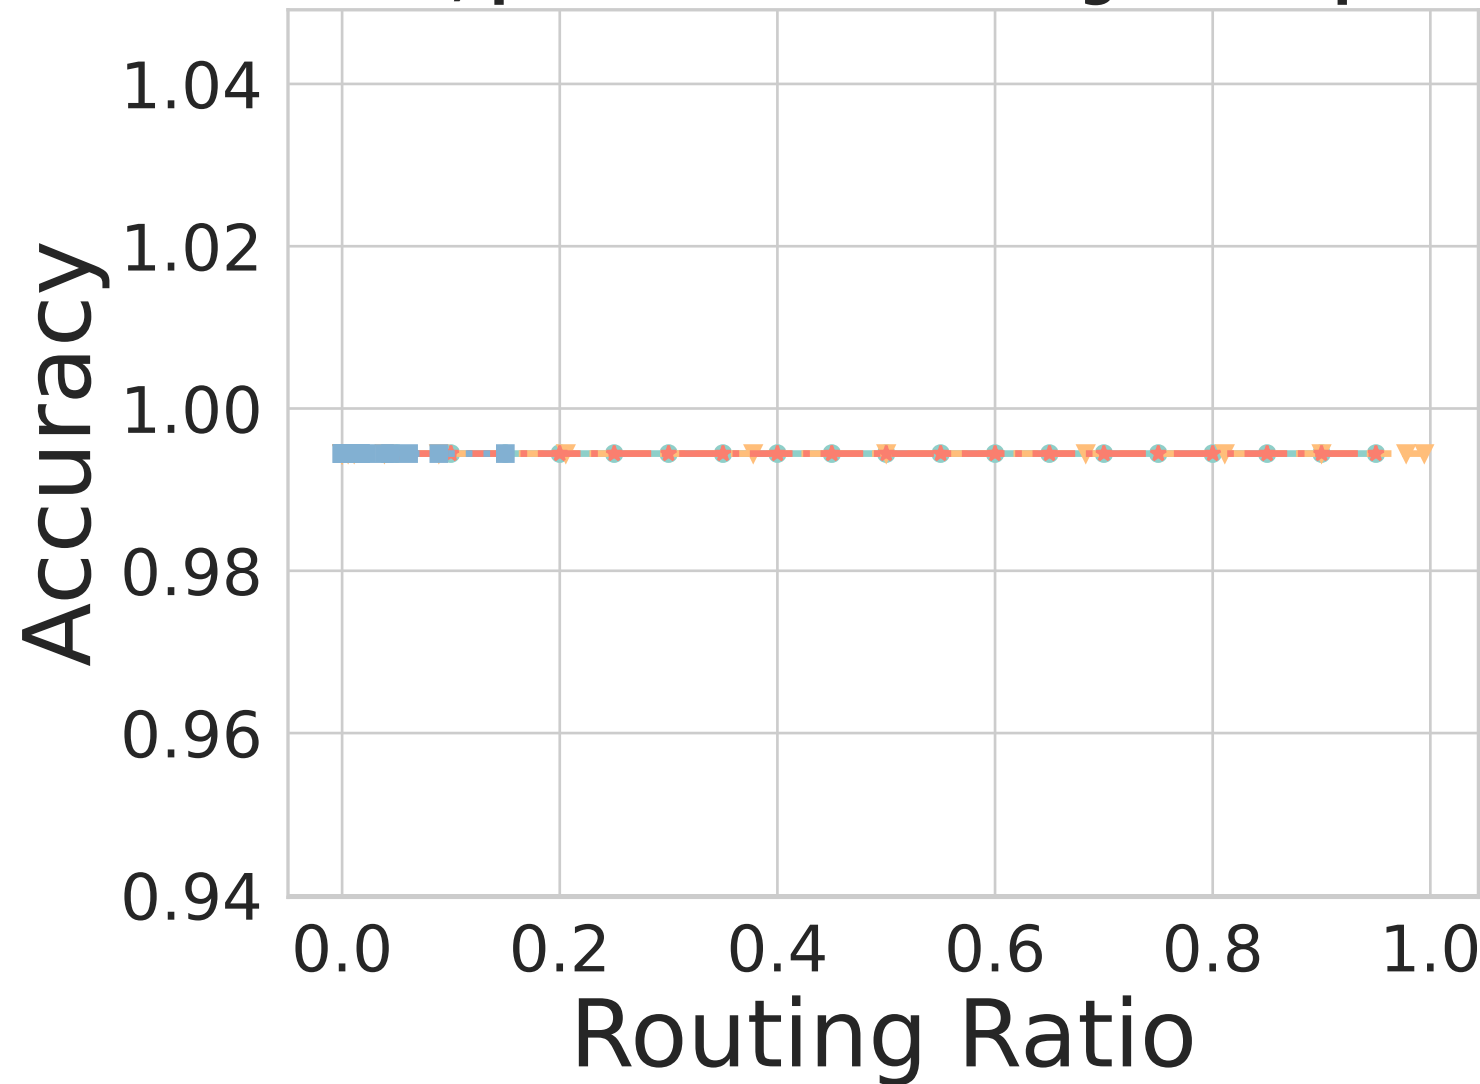

Supplement: supplementary_material [file cali_down_multiarith_phi-4-mini-reasoning_deepseek-reasoner.pdf › Routing_SLM_LLMs/Proxy_routing_prediction/to_deepseek-reasoner/multiarith_as_downstream/cali_down_multiarith_phi-4-mini-reasoning_deepseek-reasoner.pdf]

**MultiArith, qwen-2.5-7b to DeepSeek-R1**

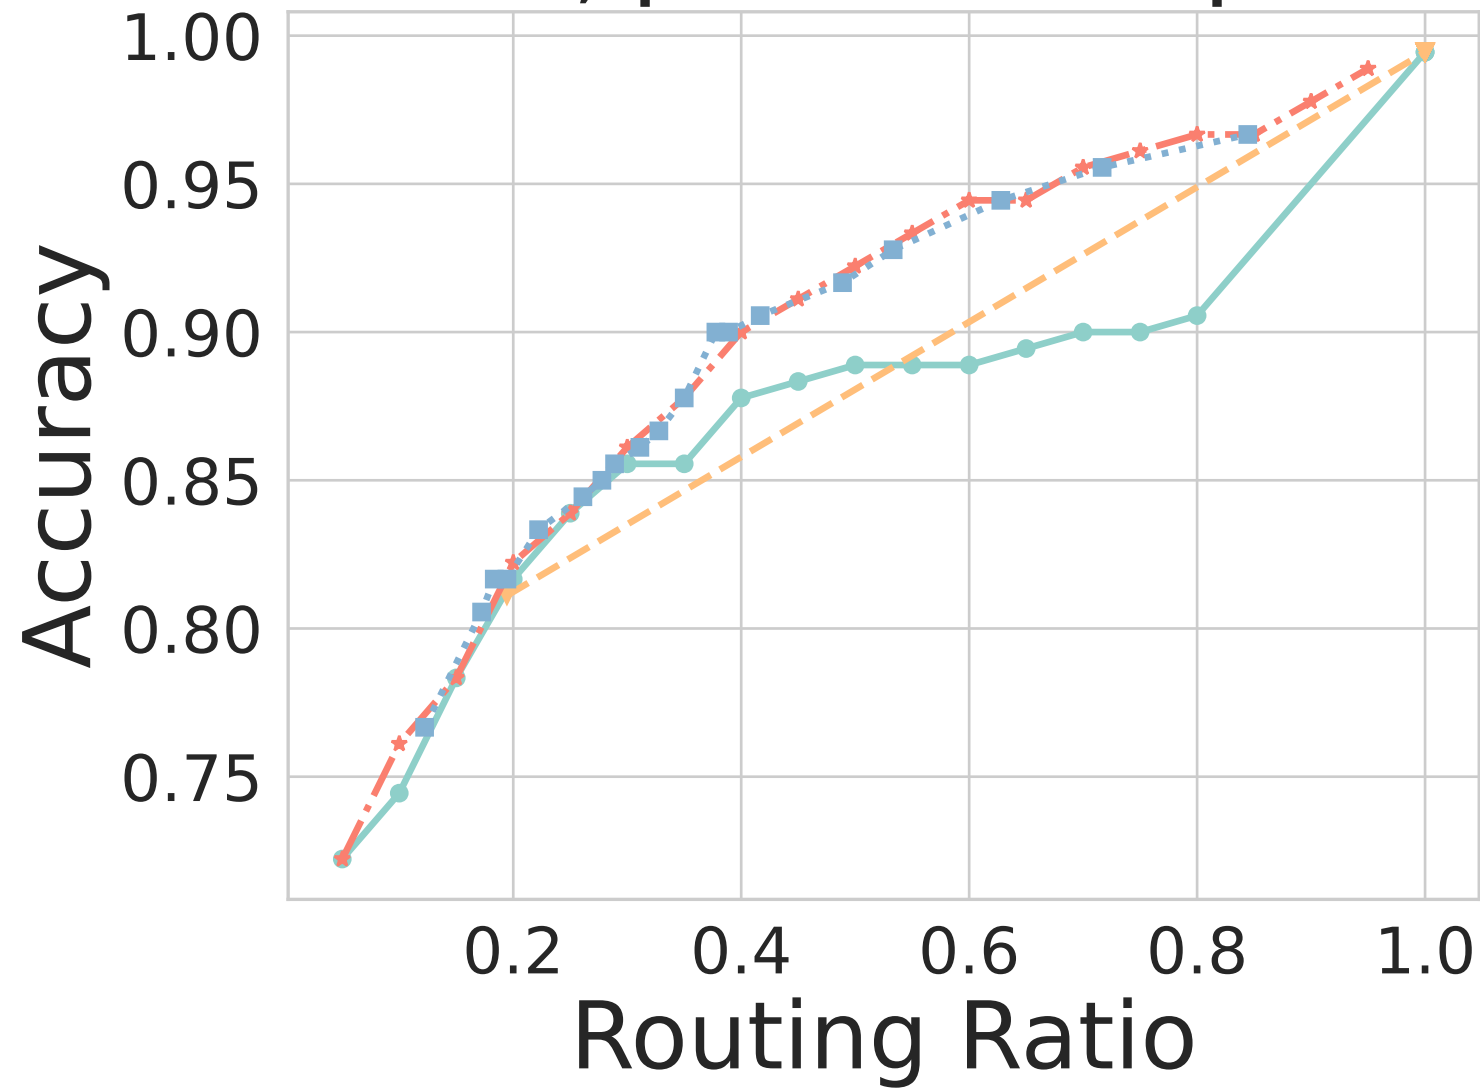

Supplement: supplementary_material [file cali_down_multiarith_qwen-2.5-7b_deepseek-reasoner.pdf › Routing_SLM_LLMs/Proxy_routing_prediction/to_deepseek-reasoner/multiarith_as_downstream/cali_down_multiarith_qwen-2.5-7b_deepseek-reasoner.pdf]

**MultiArith, rwkv to DeepSeek-R1**

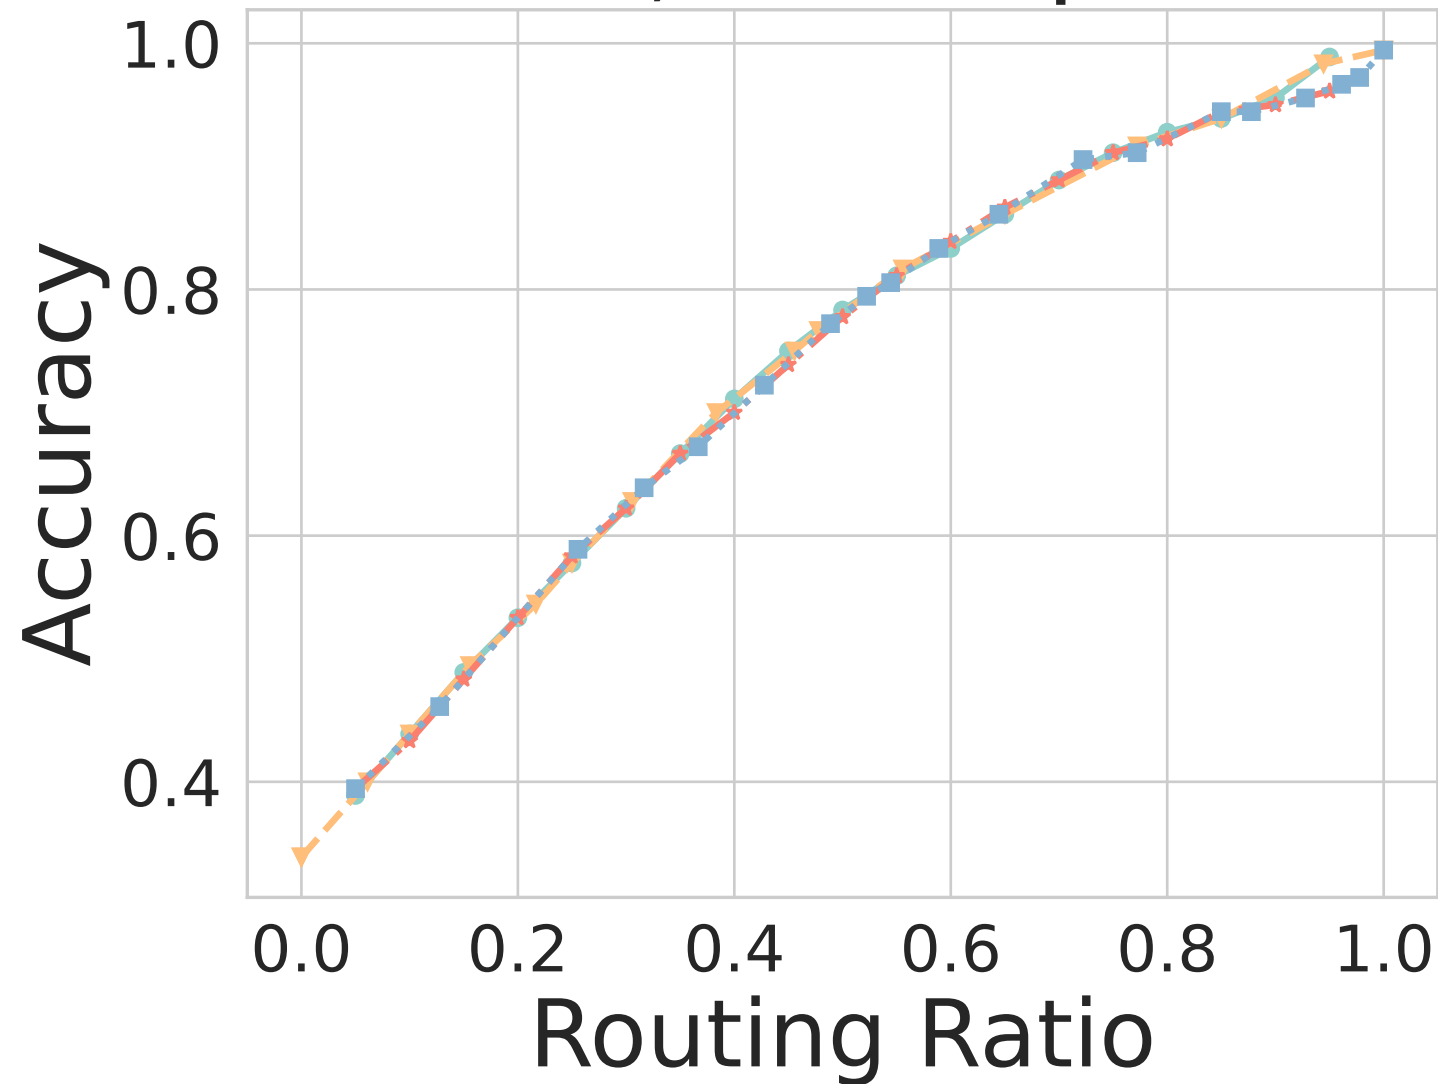

Supplement: supplementary_material [file cali_down_multiarith_rwkv_deepseek-reasoner.pdf › Routing_SLM_LLMs/Proxy_routing_prediction/to_deepseek-reasoner/multiarith_as_downstream/cali_down_multiarith_rwkv_deepseek-reasoner.pdf]

**OpenBookQA, Qwen3-0.6B to DeepSeek-R1**

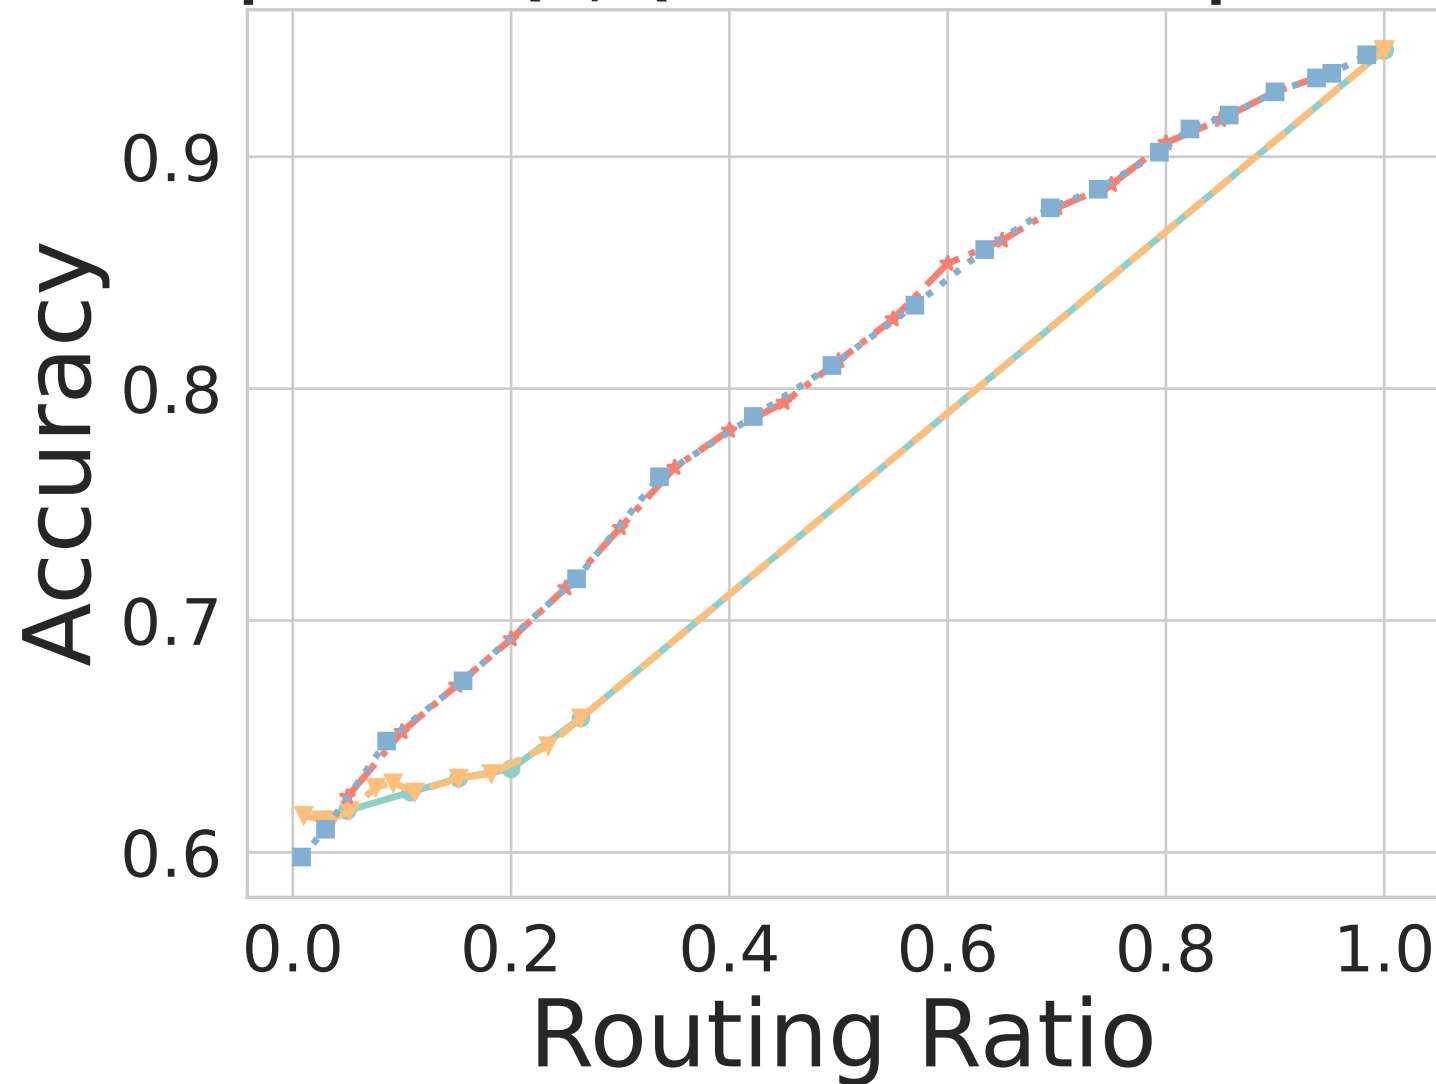

Supplement: supplementary_material [file cali_down_openbook_qa_Qwen3-0.6B_deepseek-reasoner.pdf › Routing_SLM_LLMs/Proxy_routing_prediction/to_deepseek-reasoner/openbook_qa_as_downstream/cali_down_openbook_qa_Qwen3-0.6B_deepseek-reasoner.pdf]

OpenBookQA, Qwen3-1.7B to DeepSeek-R1

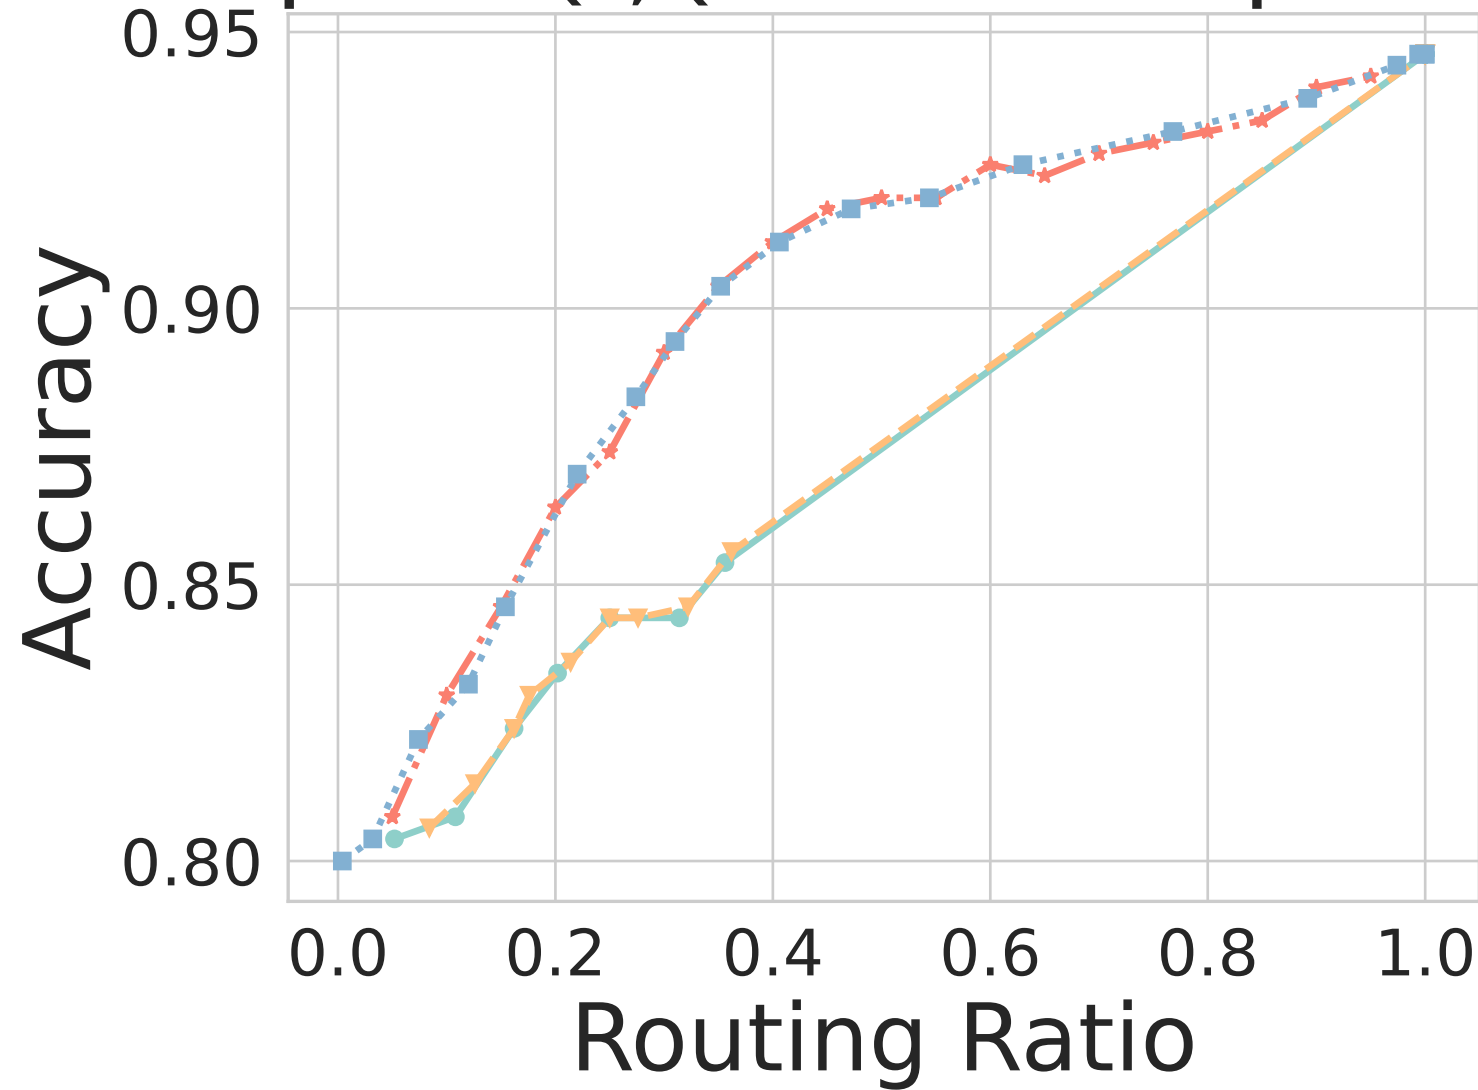

Supplement: supplementary_material [file cali_down_openbook_qa_Qwen3-1.7B_deepseek-reasoner.pdf › Routing_SLM_LLMs/Proxy_routing_prediction/to_deepseek-reasoner/openbook_qa_as_downstream/cali_down_openbook_qa_Qwen3-1.7B_deepseek-reasoner.pdf]

**OpenBookQA, Qwen3-4B to DeepSeek-R1**

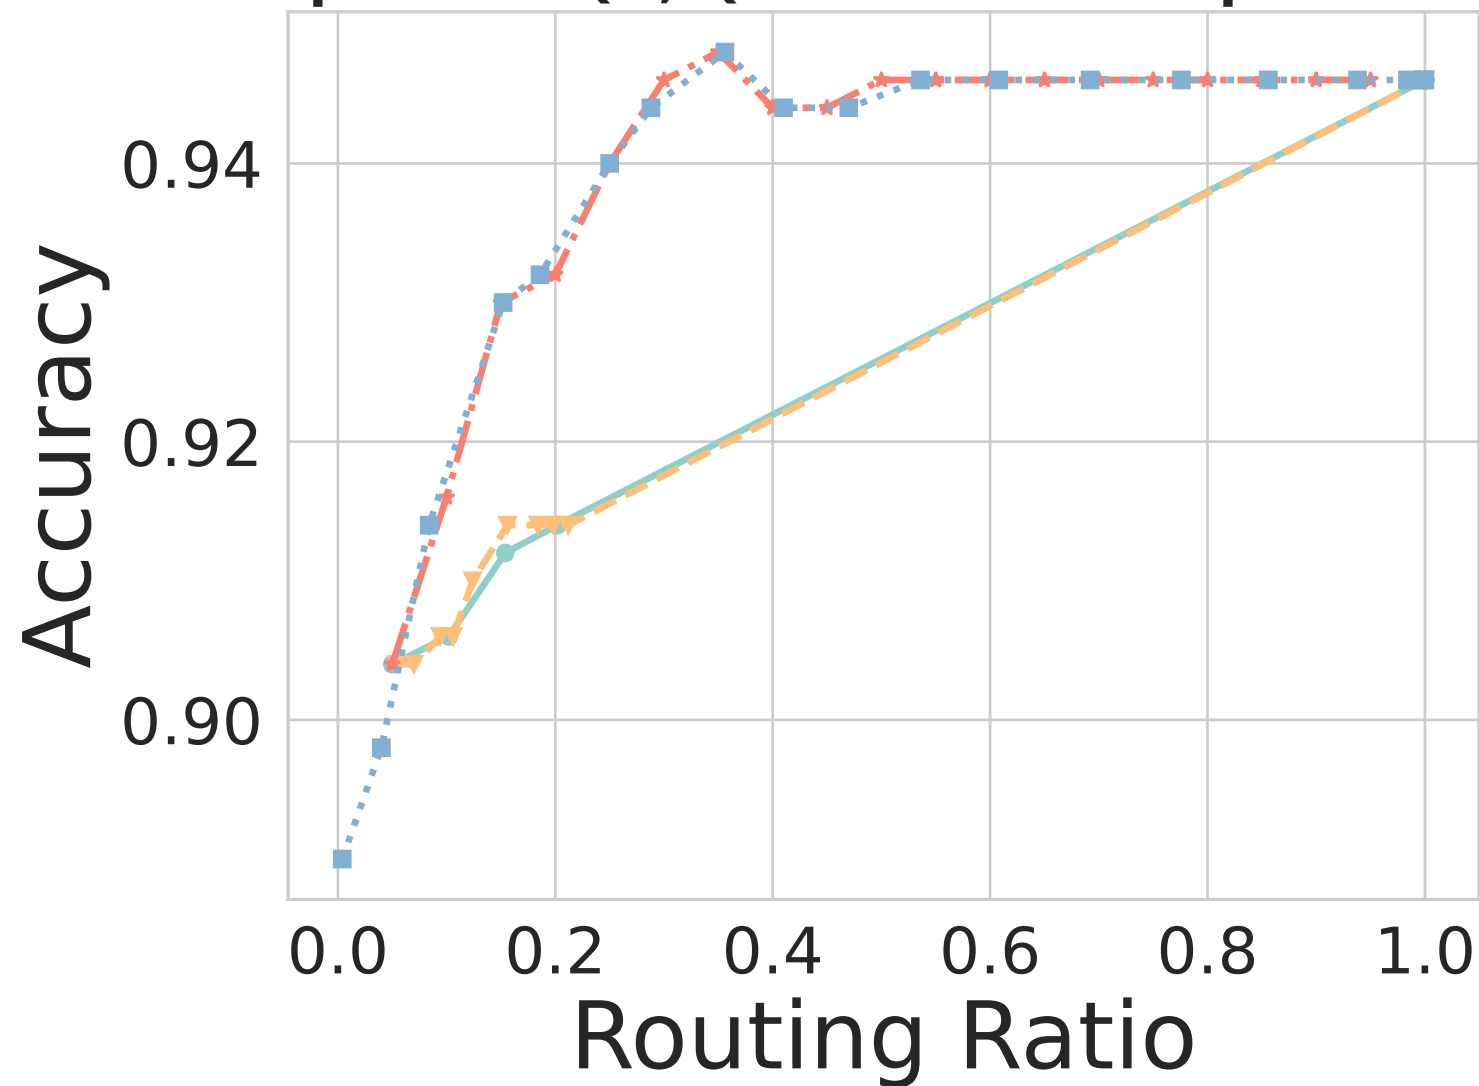

Supplement: supplementary_material [file cali_down_openbook_qa_Qwen3-4B_deepseek-reasoner.pdf › Routing_SLM_LLMs/Proxy_routing_prediction/to_deepseek-reasoner/openbook_qa_as_downstream/cali_down_openbook_qa_Qwen3-4B_deepseek-reasoner.pdf]

**OpenBookQA, granite-3.1-8b to DeepSeek-R1**

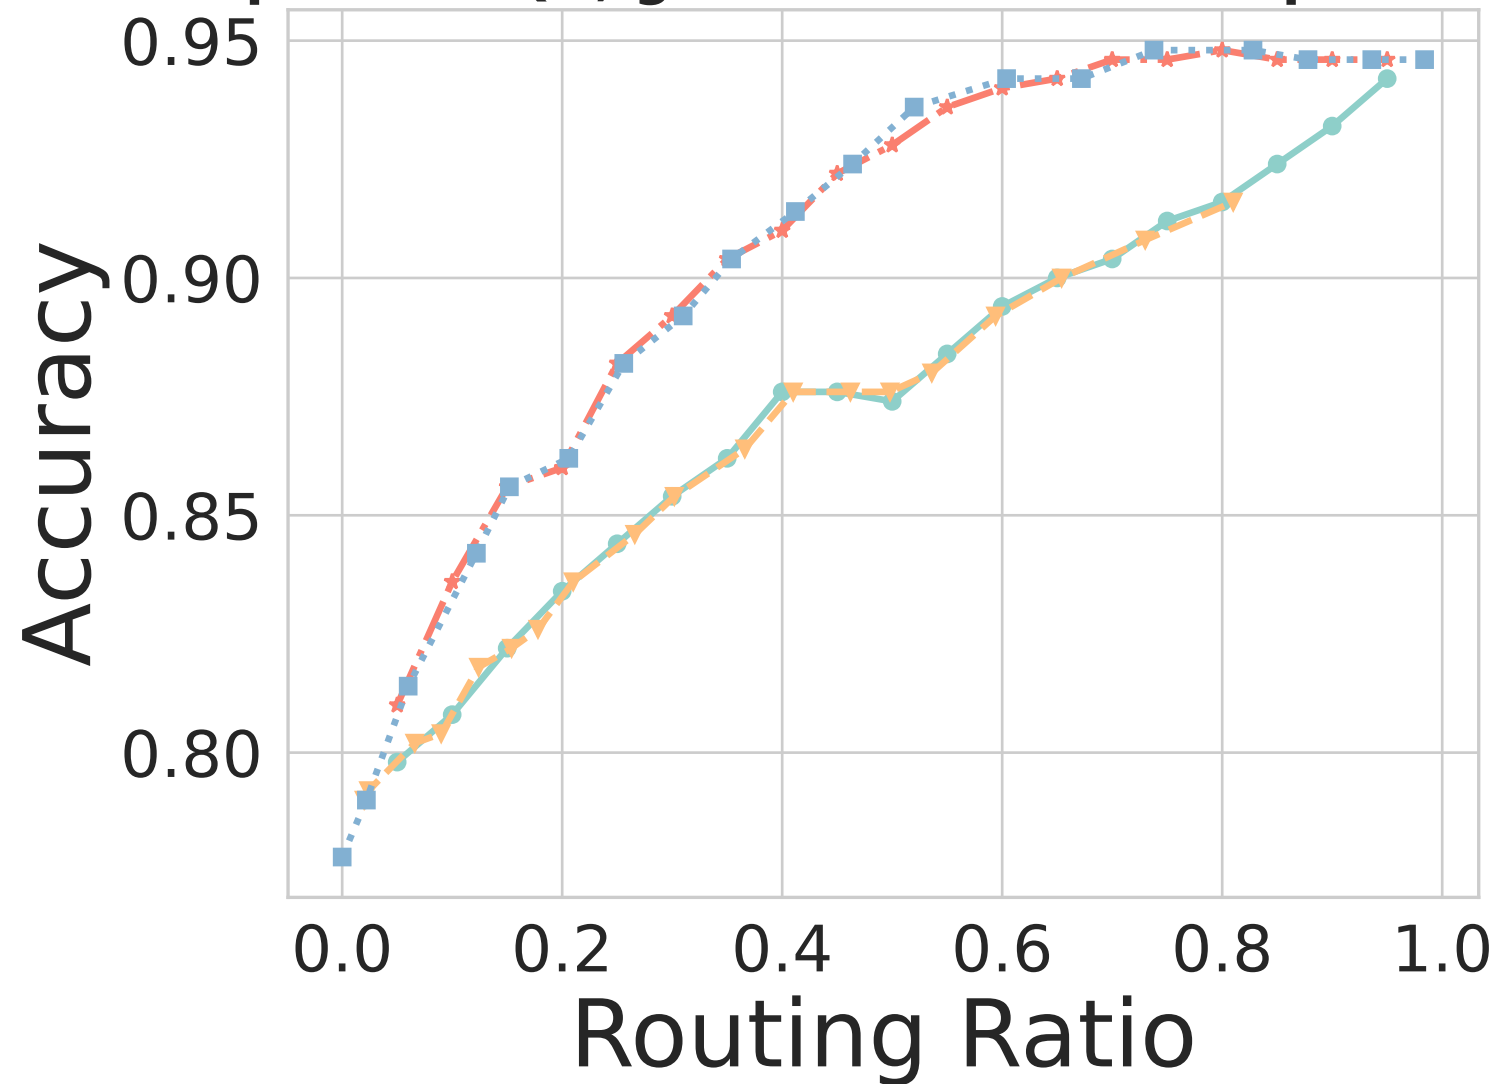

Supplement: supplementary_material [file cali_down_openbook_qa_granite-3.1-8b_deepseek-reasoner.pdf › Routing_SLM_LLMs/Proxy_routing_prediction/to_deepseek-reasoner/openbook_qa_as_downstream/cali_down_openbook_qa_granite-3.1-8b_deepseek-reasoner.pdf]

OpenBookQA, llama-3.1-8b to DeepSeek-R1

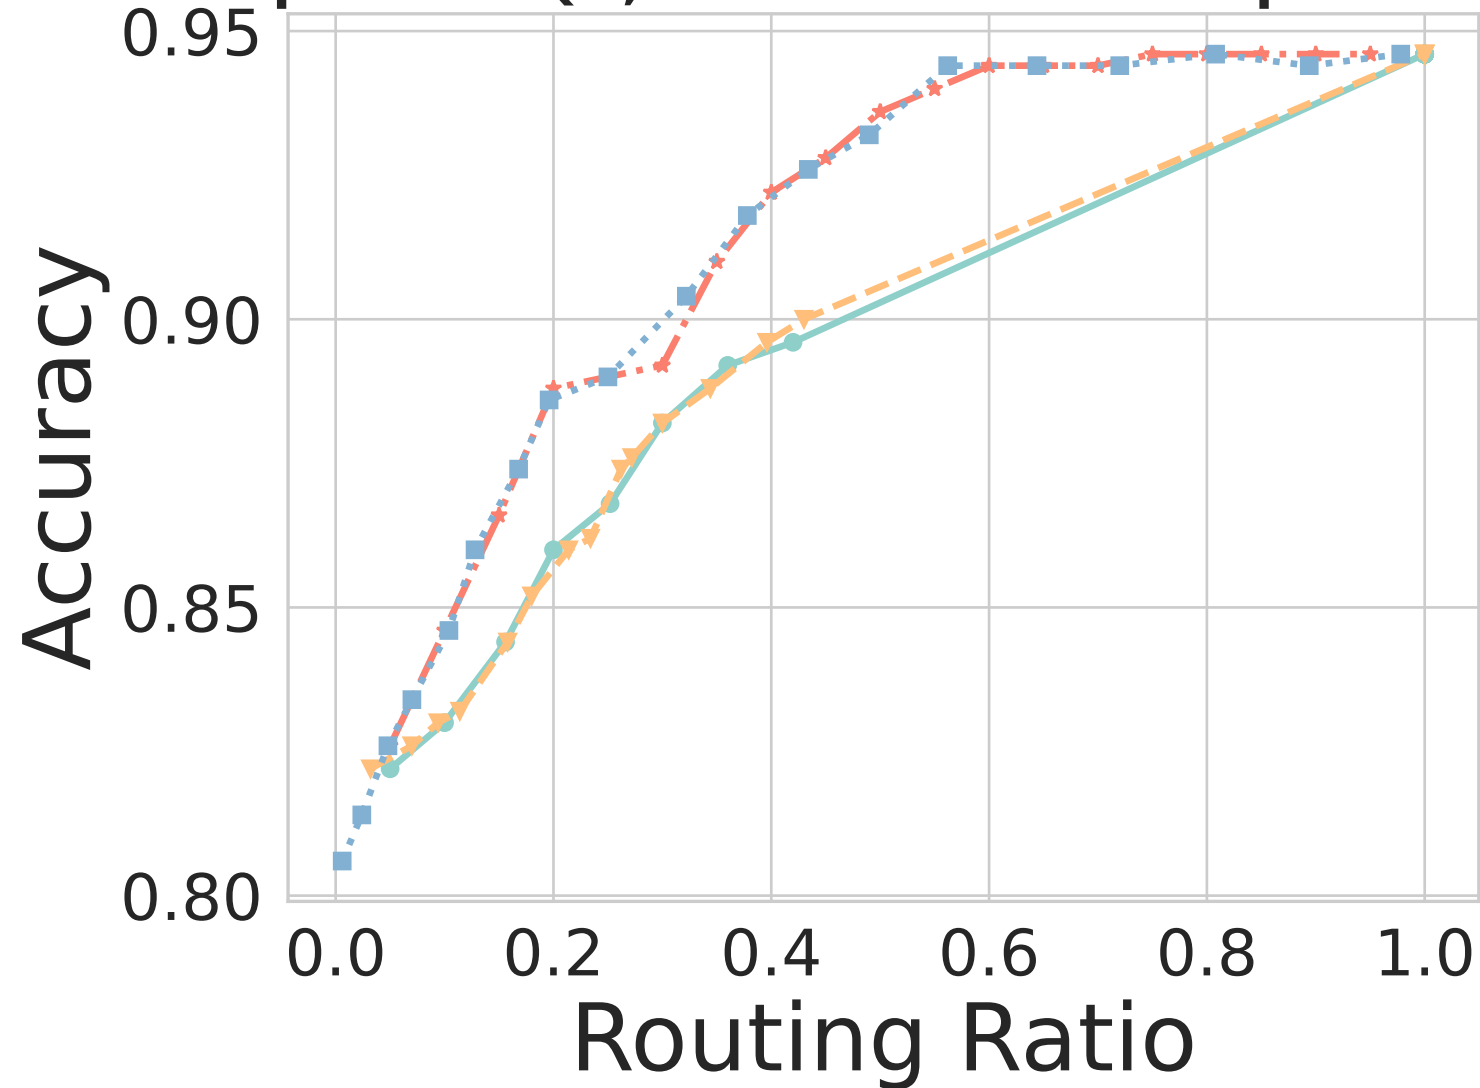

Supplement: supplementary_material [file cali_down_openbook_qa_llama-3.1-8b_deepseek-reasoner.pdf › Routing_SLM_LLMs/Proxy_routing_prediction/to_deepseek-reasoner/openbook_qa_as_downstream/cali_down_openbook_qa_llama-3.1-8b_deepseek-reasoner.pdf]

**OpenBookQA, llama-3.2-1b to DeepSeek-R1**

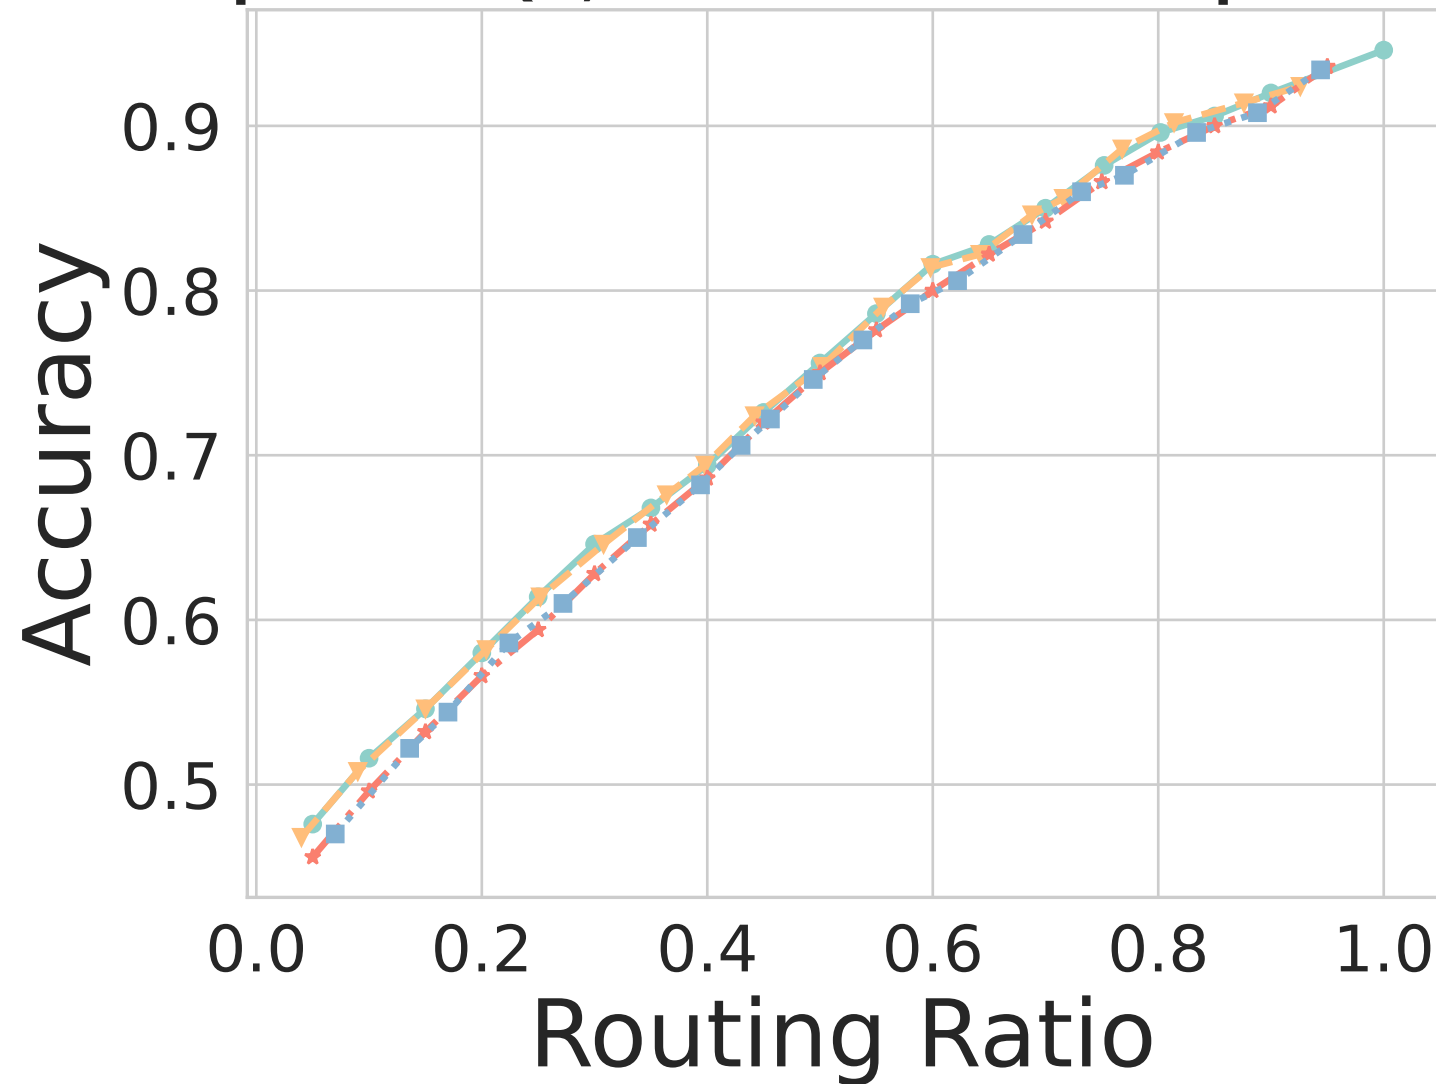

Supplement: supplementary_material [file cali_down_openbook_qa_llama-3.2-1b_deepseek-reasoner.pdf › Routing_SLM_LLMs/Proxy_routing_prediction/to_deepseek-reasoner/openbook_qa_as_downstream/cali_down_openbook_qa_llama-3.2-1b_deepseek-reasoner.pdf]

**OpenBookQA, llama-3.2-3b to DeepSeek-R1**

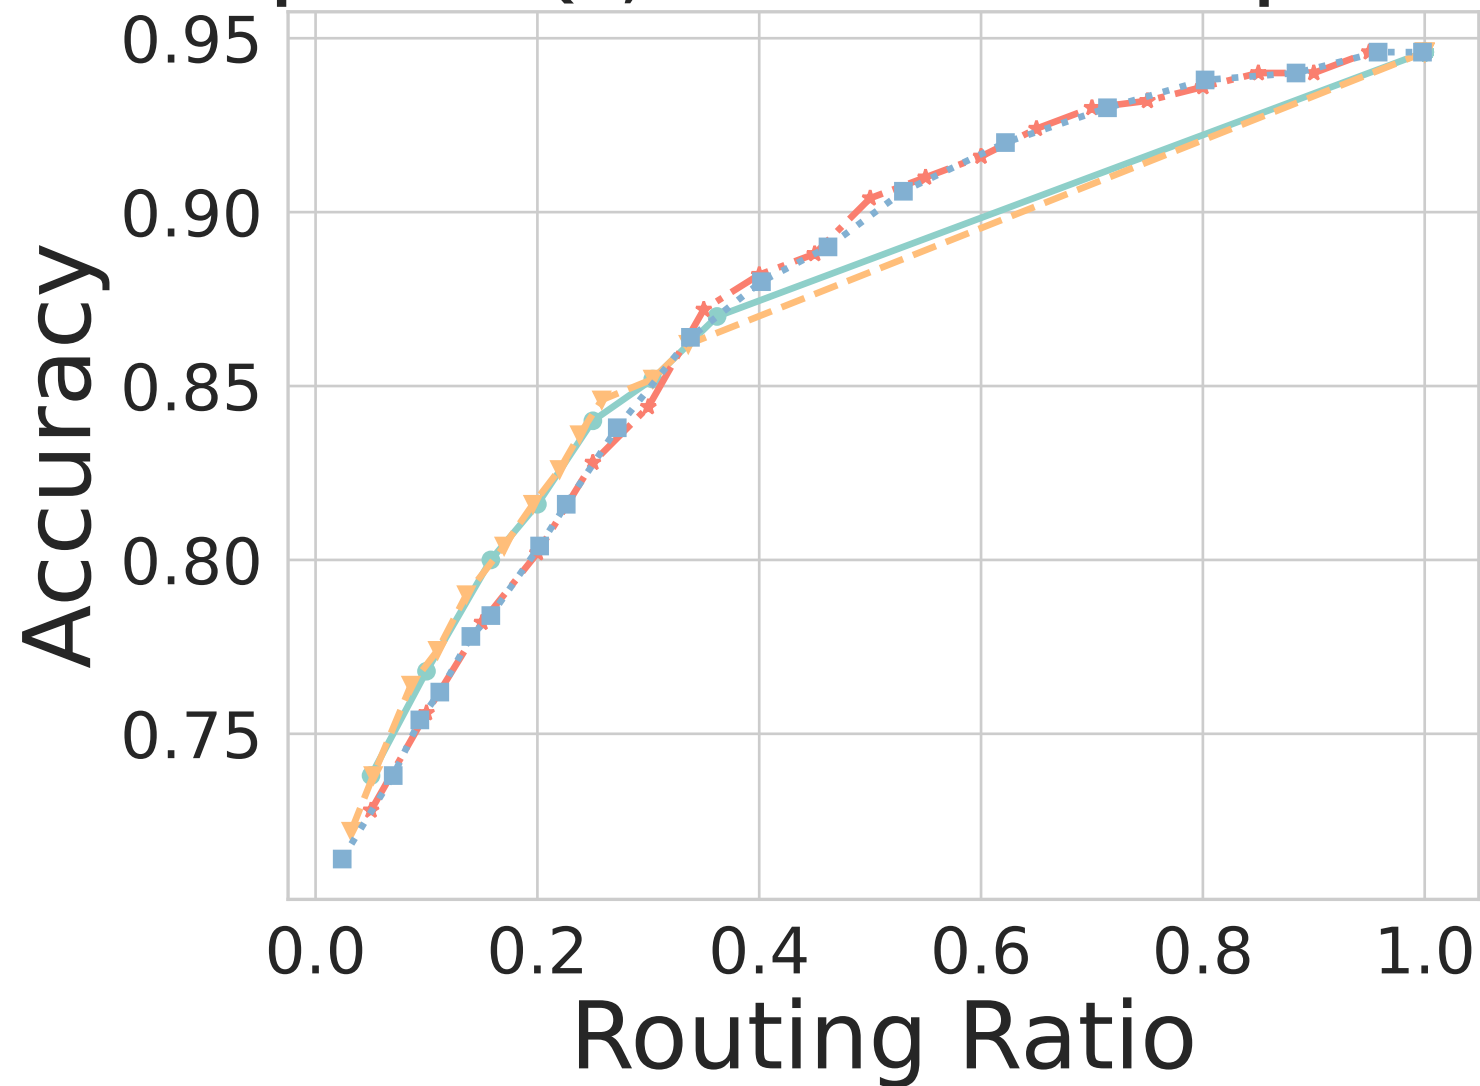

Supplement: supplementary_material [file cali_down_openbook_qa_llama-3.2-3b_deepseek-reasoner.pdf › Routing_SLM_LLMs/Proxy_routing_prediction/to_deepseek-reasoner/openbook_qa_as_downstream/cali_down_openbook_qa_llama-3.2-3b_deepseek-reasoner.pdf]

# OpenBookQA, mistral-7b to DeepSeek-R1

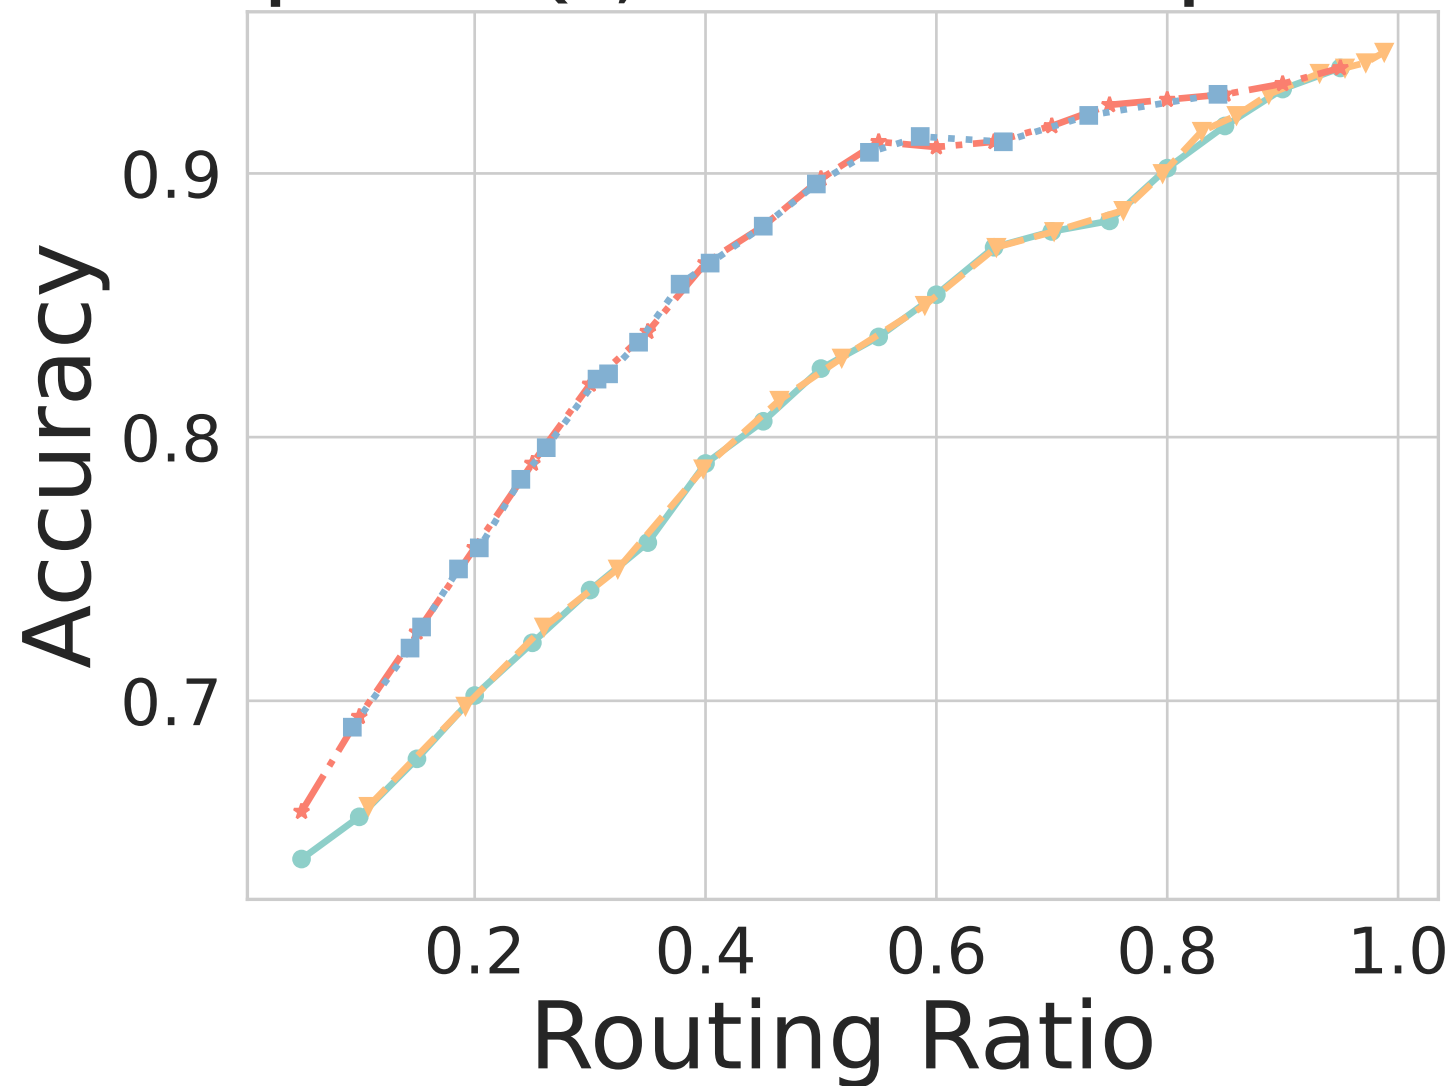

Supplement: supplementary_material [file cali_down_openbook_qa_mistral-7b_deepseek-reasoner.pdf › Routing_SLM_LLMs/Proxy_routing_prediction/to_deepseek-reasoner/openbook_qa_as_downstream/cali_down_openbook_qa_mistral-7b_deepseek-reasoner.pdf]

OpenBookQA, phi-3.5-mini to DeepSeek-R1

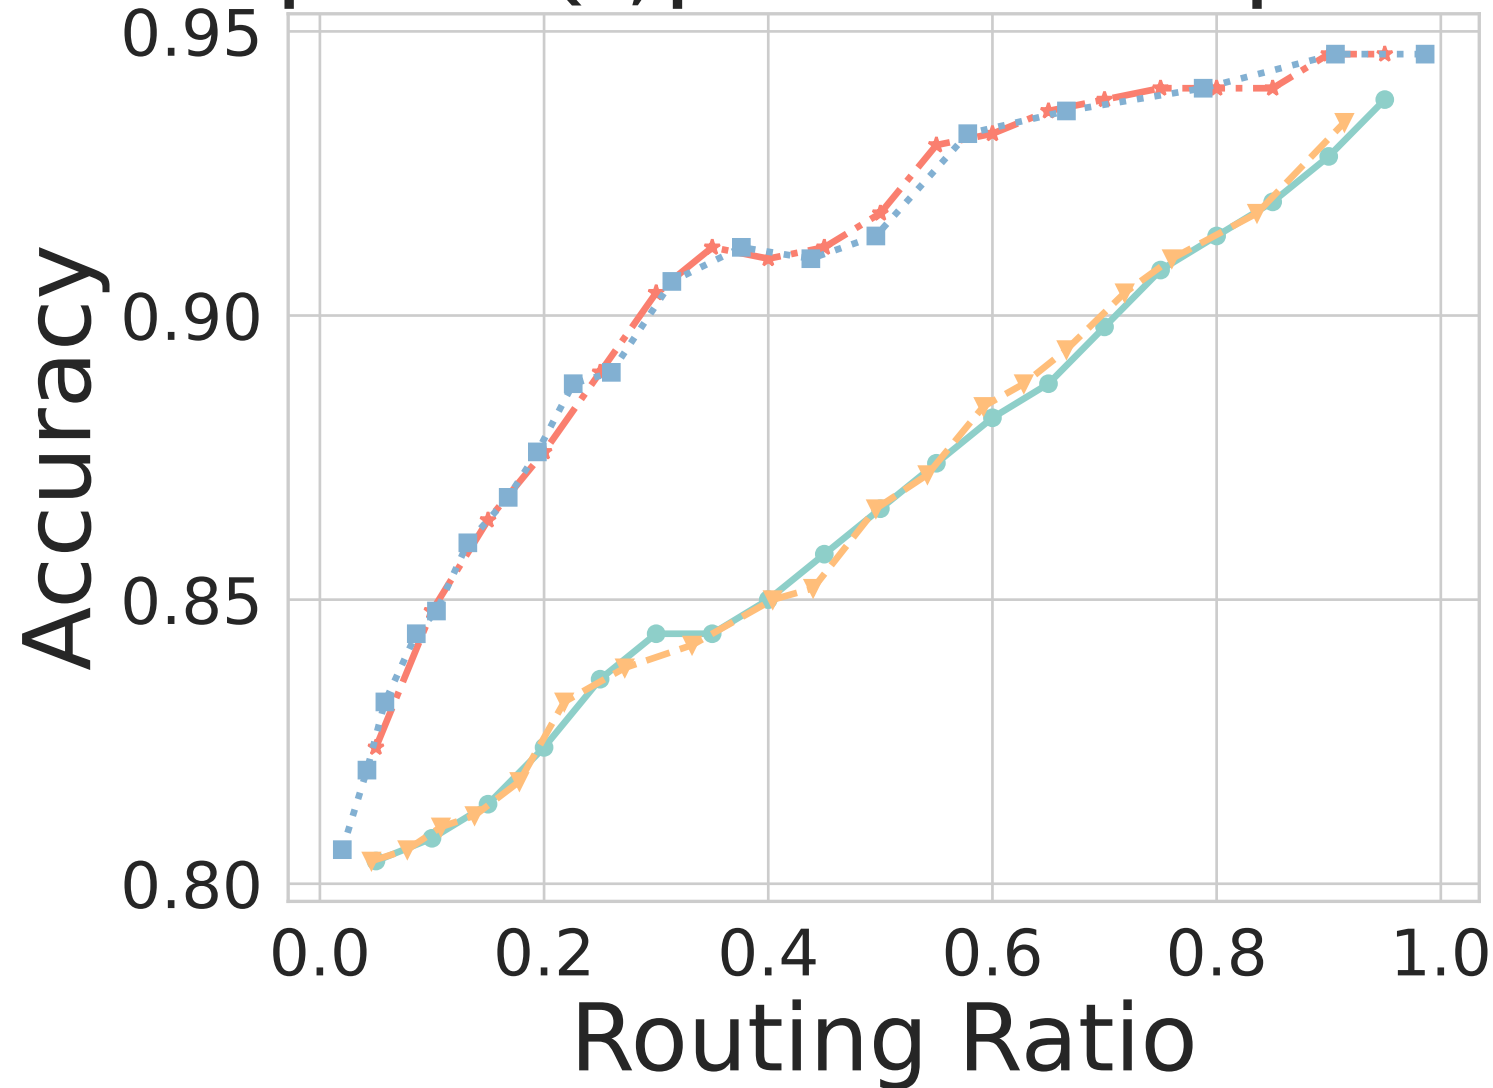

Supplement: supplementary_material [file cali_down_openbook_qa_phi-3.5-mini_deepseek-reasoner.pdf › Routing_SLM_LLMs/Proxy_routing_prediction/to_deepseek-reasoner/openbook_qa_as_downstream/cali_down_openbook_qa_phi-3.5-mini_deepseek-reasoner.pdf]

# OpenBookQA, phi-4-mini-reasoning to DeepSeek-R1

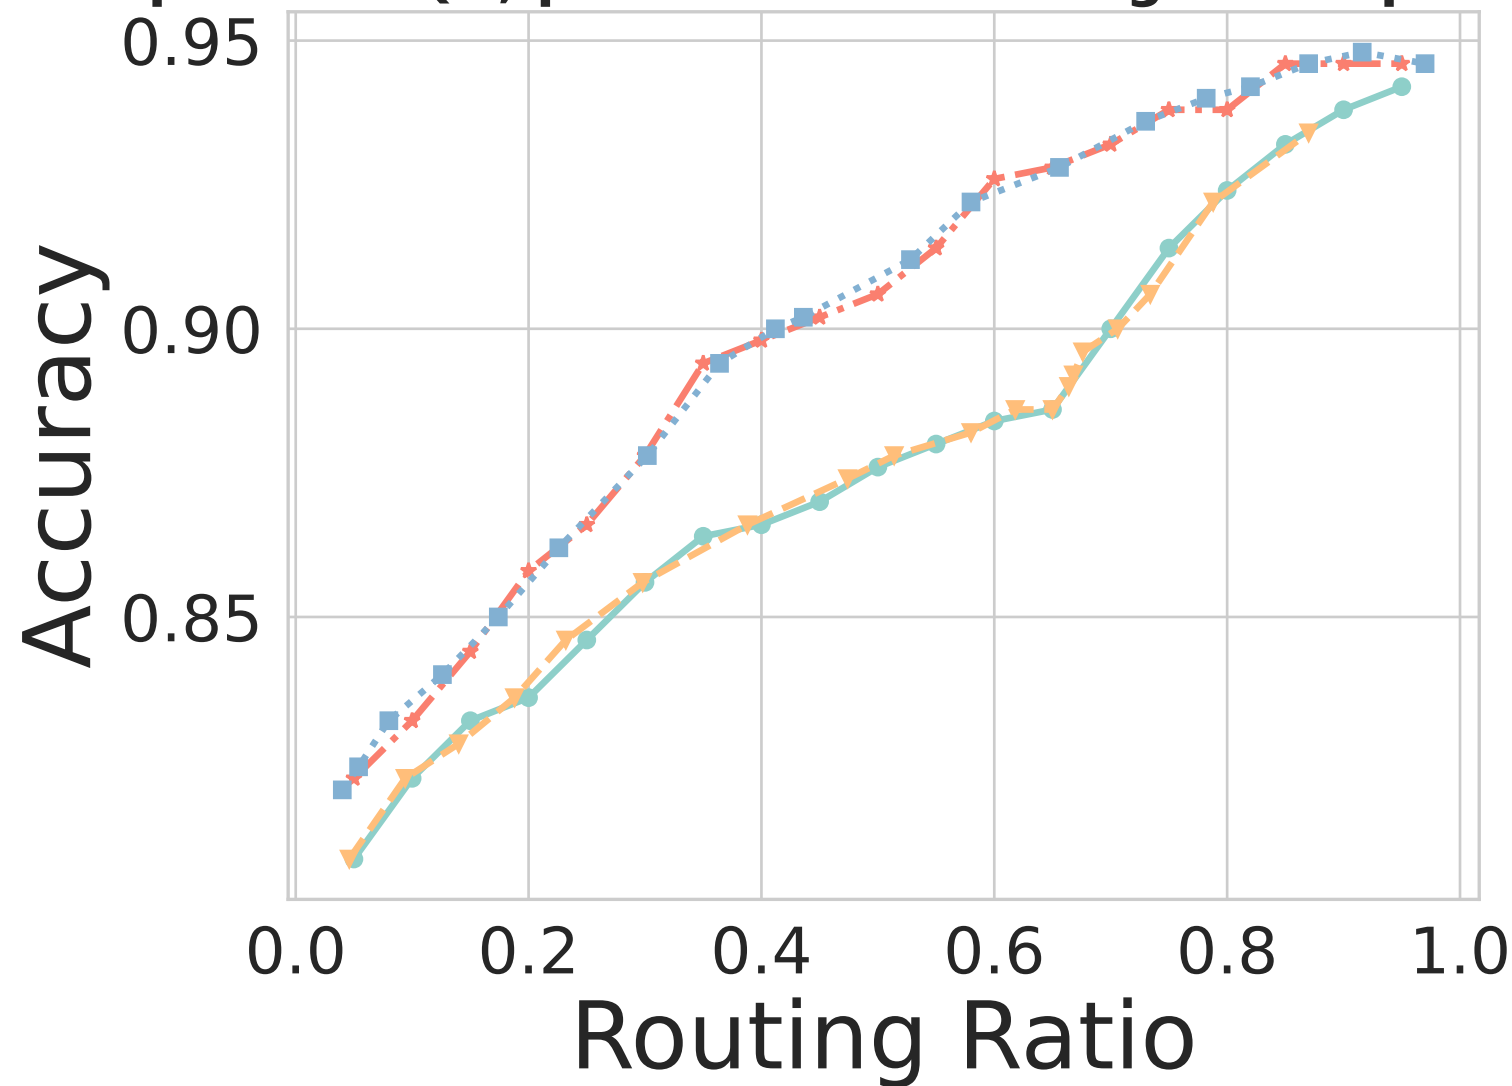

Supplement: supplementary_material [file cali_down_openbook_qa_phi-4-mini-reasoning_deepseek-reasoner.pdf › Routing_SLM_LLMs/Proxy_routing_prediction/to_deepseek-reasoner/openbook_qa_as_downstream/cali_down_openbook_qa_phi-4-mini-reasoning_deepseek-reasoner.pdf]

OpenBookQA, qwen-2.5-7b to DeepSeek-R1

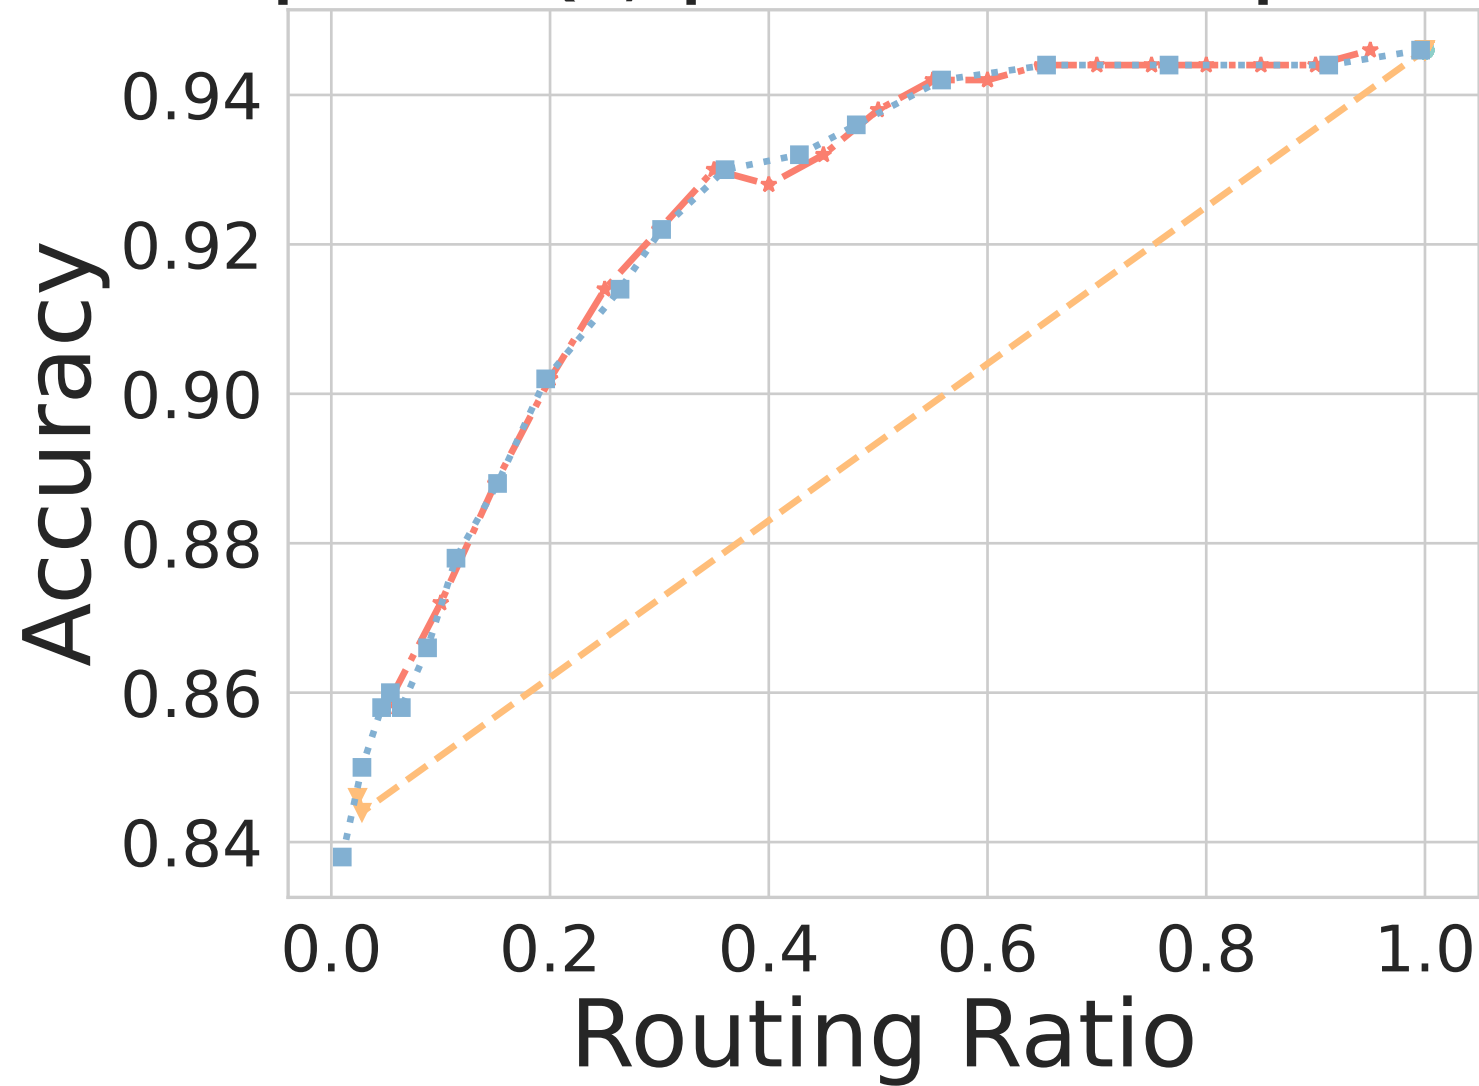

Supplement: supplementary_material [file cali_down_openbook_qa_qwen-2.5-7b_deepseek-reasoner.pdf › Routing_SLM_LLMs/Proxy_routing_prediction/to_deepseek-reasoner/openbook_qa_as_downstream/cali_down_openbook_qa_qwen-2.5-7b_deepseek-reasoner.pdf]

**OpenBookQA, rwkv to DeepSeek-R1**

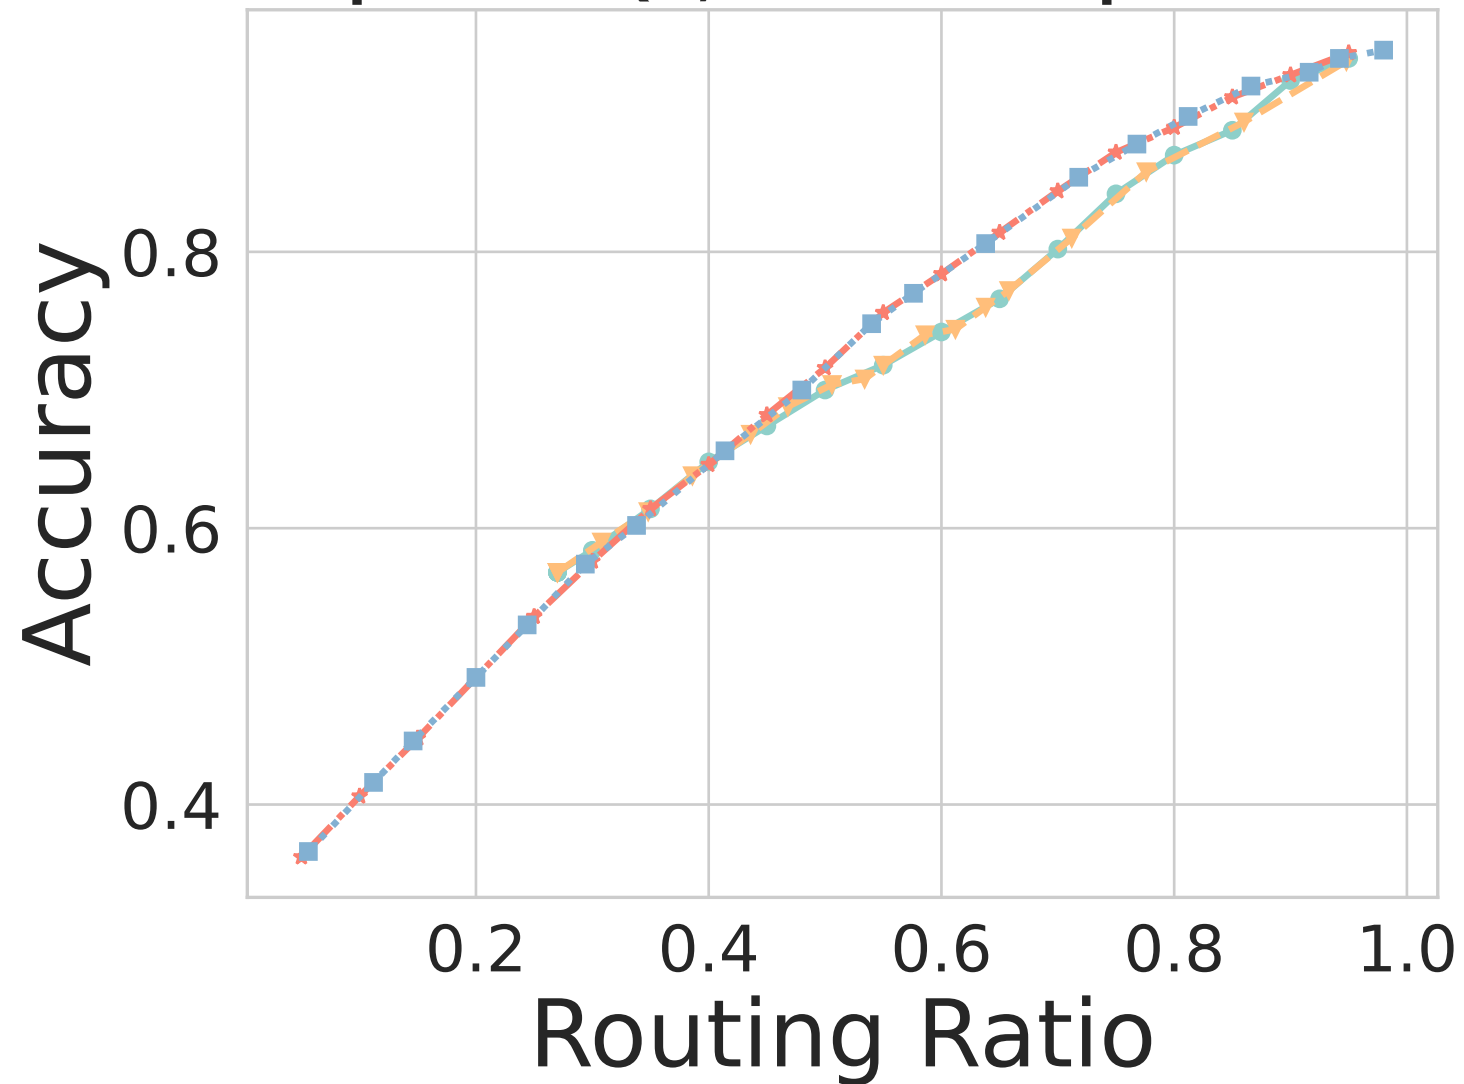

Supplement: supplementary_material [file cali_down_openbook_qa_rwkv_deepseek-reasoner.pdf › Routing_SLM_LLMs/Proxy_routing_prediction/to_deepseek-reasoner/openbook_qa_as_downstream/cali_down_openbook_qa_rwkv_deepseek-reasoner.pdf]
