# Supplementary material (part 5 of 14)
Source: ML conference proceedings conference paper supplement (https://openreview.net/forum?id=smdbra3VEi)

**CommonsenseQA, llama-3.1-8b to GPT-4.1 mini**

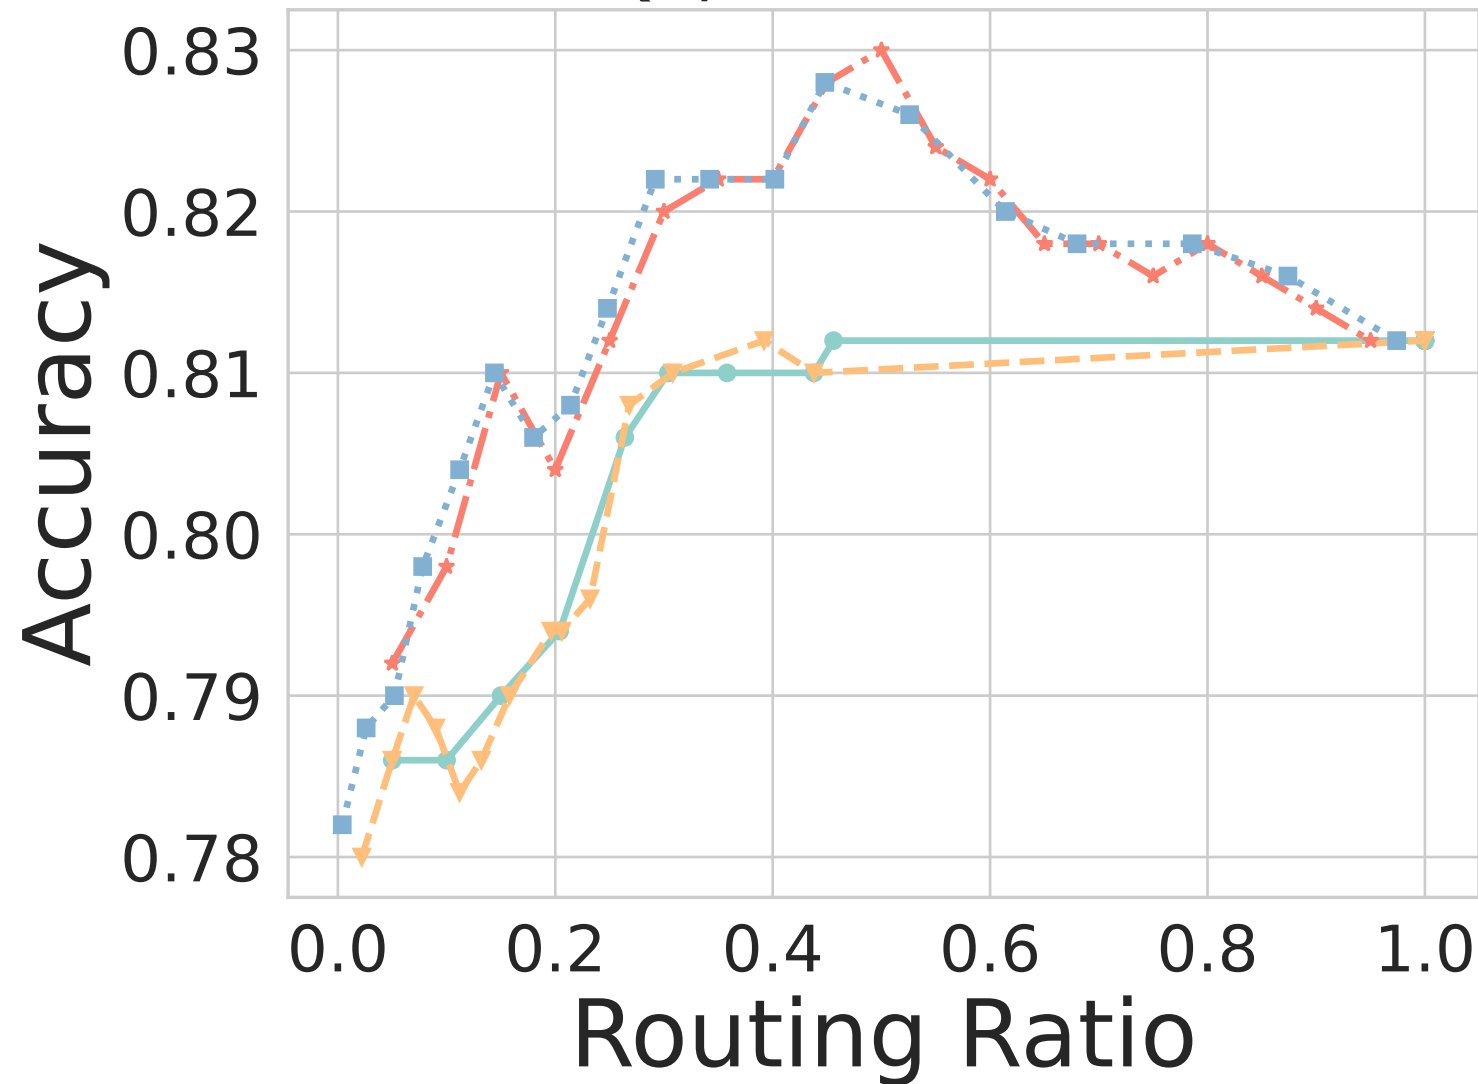

Supplement: supplementary_material [file cali_down_commonsense_qa_llama-3.1-8b_gpt-4.1-mini.pdf › Routing_SLM_LLMs/Proxy_routing_prediction/to_gpt-4.1-mini/commonsense_qa_as_downstream/cali_down_commonsense_qa_llama-3.1-8b_gpt-4.1-mini.pdf]

**CommonsenseQA, llama-3.2-1b to GPT-4.1 mini**

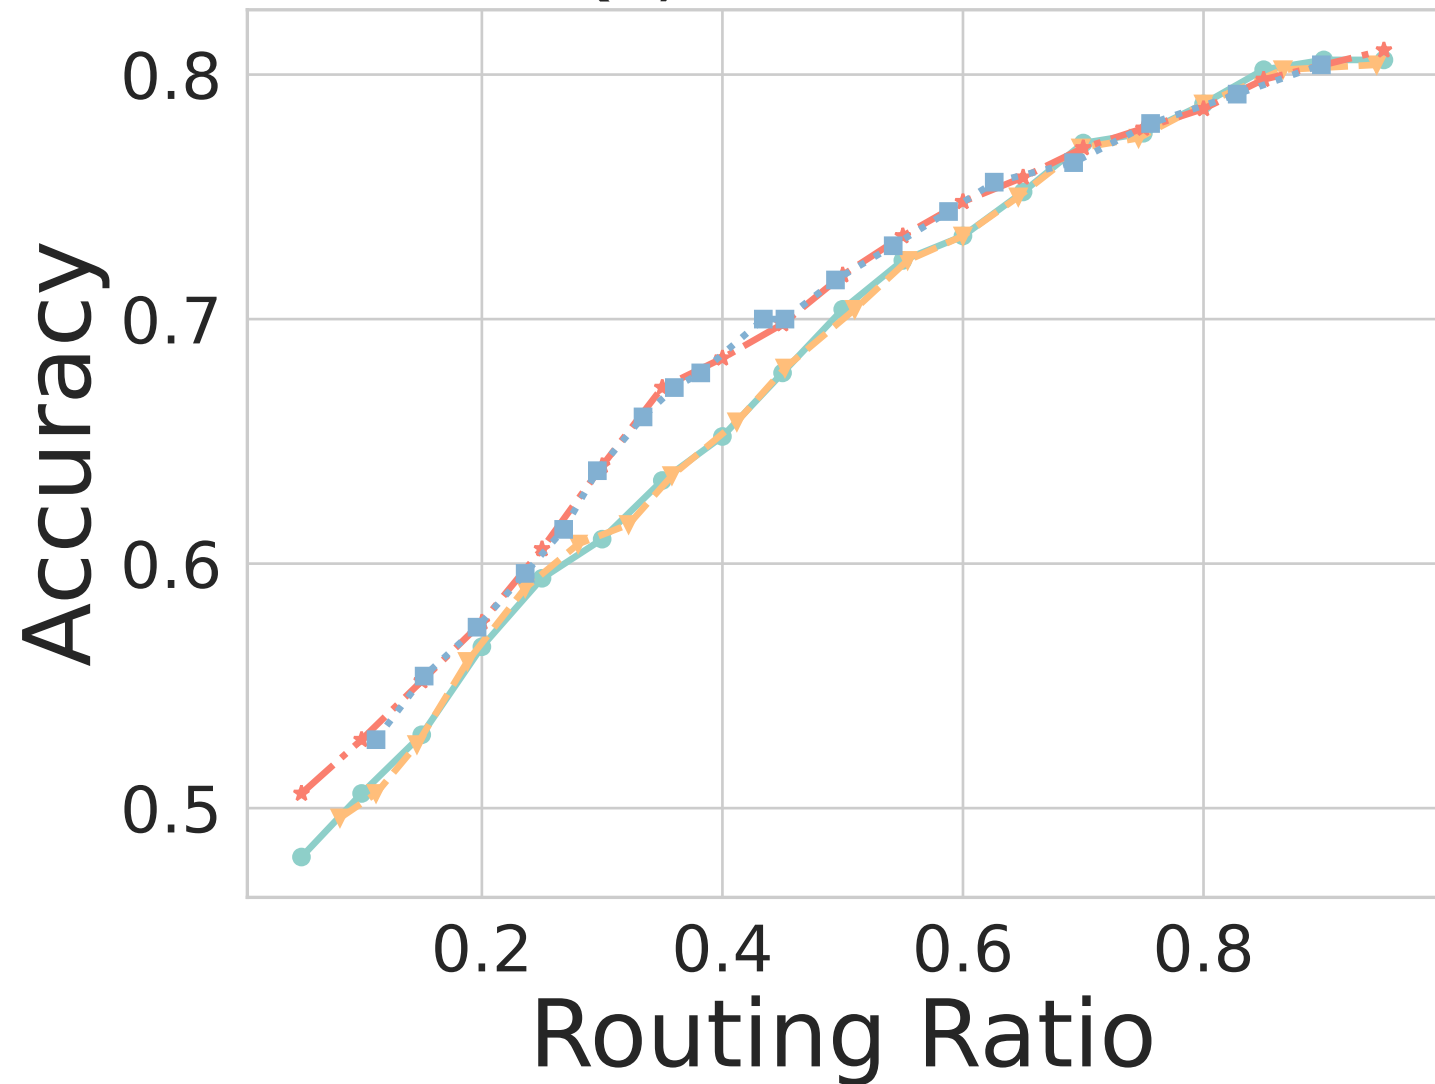

Supplement: supplementary_material [file cali_down_commonsense_qa_llama-3.2-1b_gpt-4.1-mini.pdf › Routing_SLM_LLMs/Proxy_routing_prediction/to_gpt-4.1-mini/commonsense_qa_as_downstream/cali_down_commonsense_qa_llama-3.2-1b_gpt-4.1-mini.pdf]

CommonsenseQA, llama-3.2-3b to GPT-4.1 mini

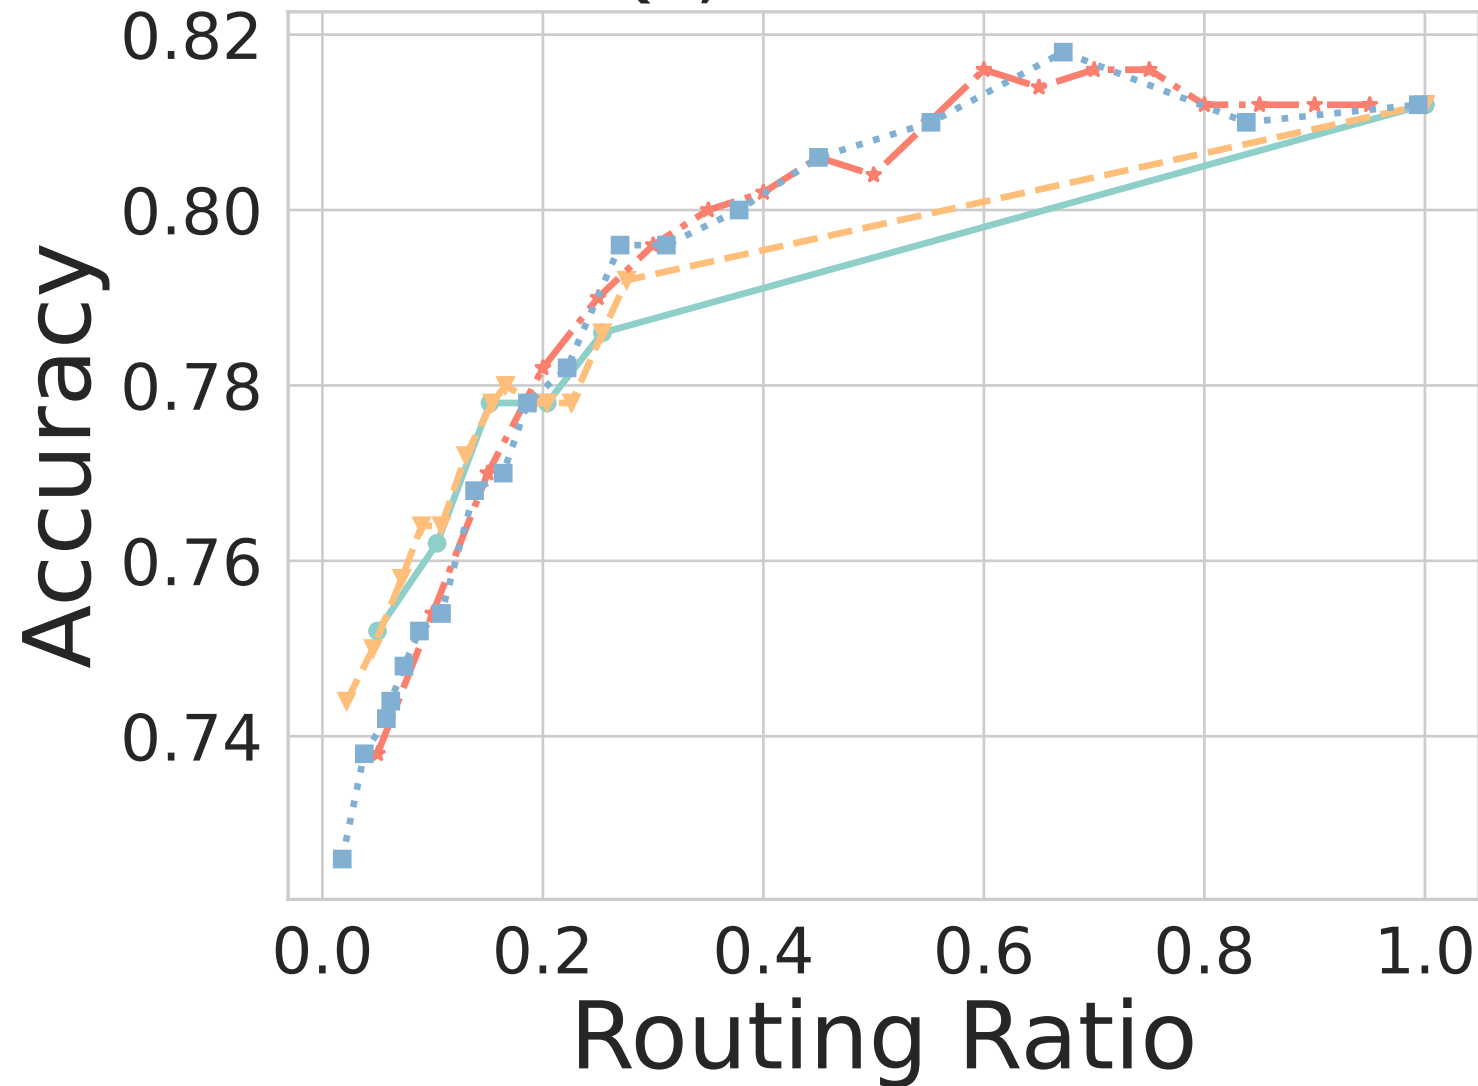

Supplement: supplementary_material [file cali_down_commonsense_qa_llama-3.2-3b_gpt-4.1-mini.pdf › Routing_SLM_LLMs/Proxy_routing_prediction/to_gpt-4.1-mini/commonsense_qa_as_downstream/cali_down_commonsense_qa_llama-3.2-3b_gpt-4.1-mini.pdf]

**CommonsenseQA, mistral-7b to GPT-4.1 mini**

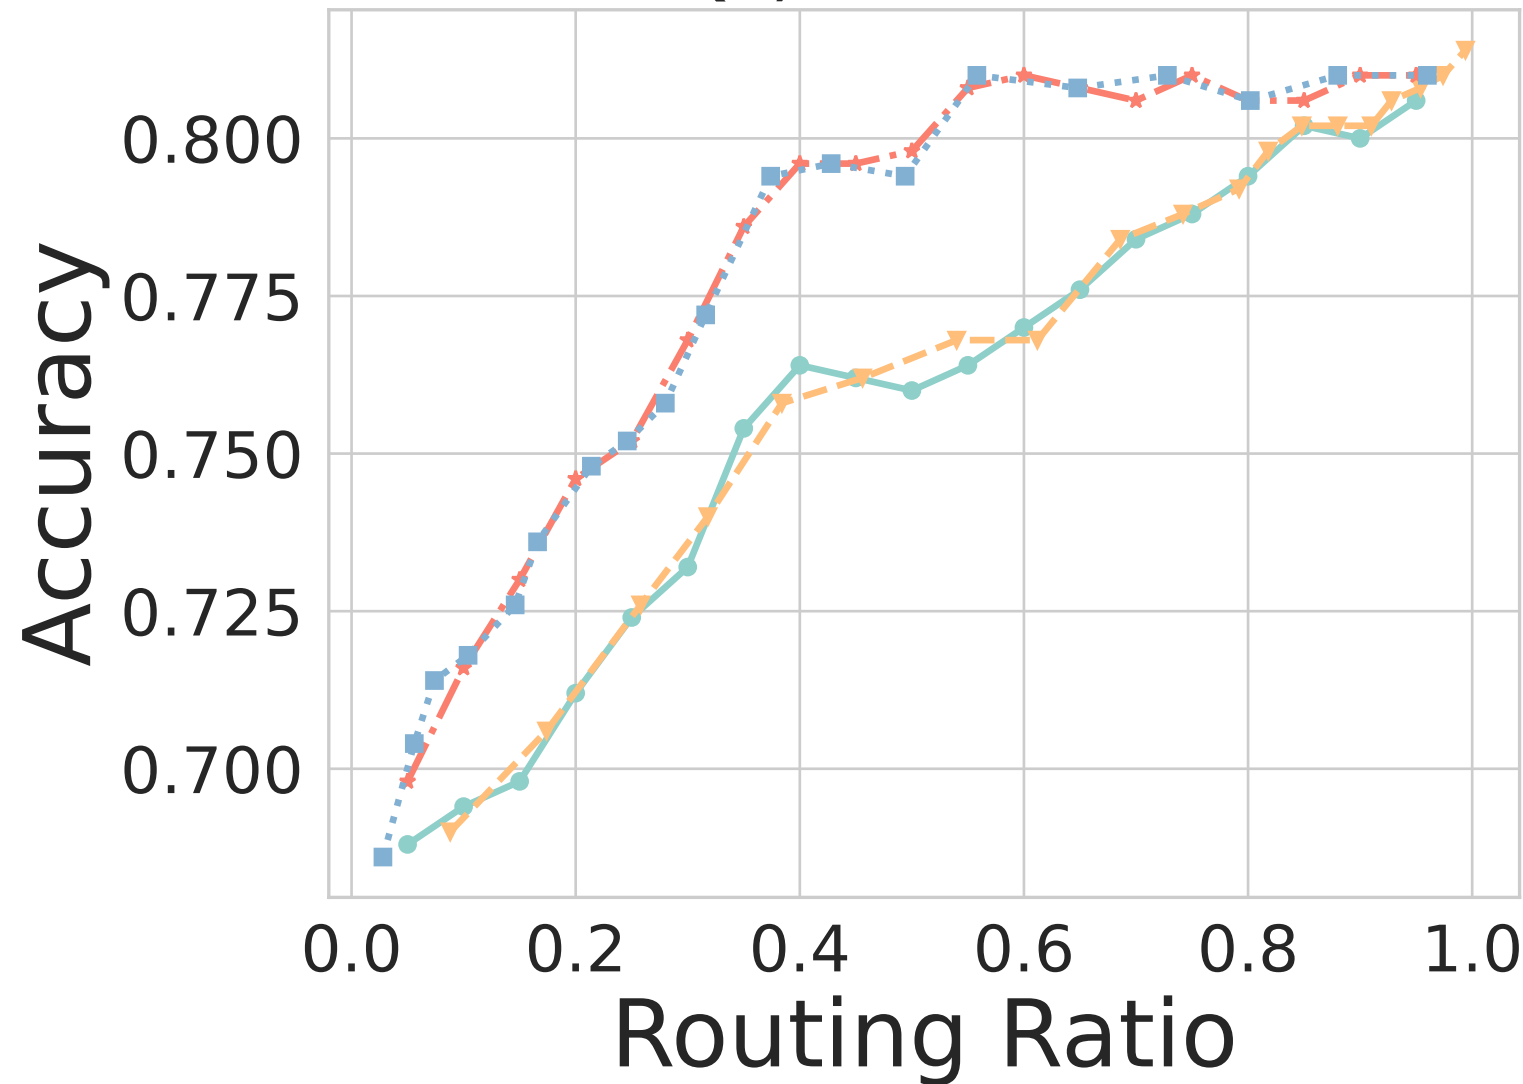

Supplement: supplementary_material [file cali_down_commonsense_qa_mistral-7b_gpt-4.1-mini.pdf › Routing_SLM_LLMs/Proxy_routing_prediction/to_gpt-4.1-mini/commonsense_qa_as_downstream/cali_down_commonsense_qa_mistral-7b_gpt-4.1-mini.pdf]

**CommonsenseQA, phi-3.5-mini to GPT-4.1 mini**

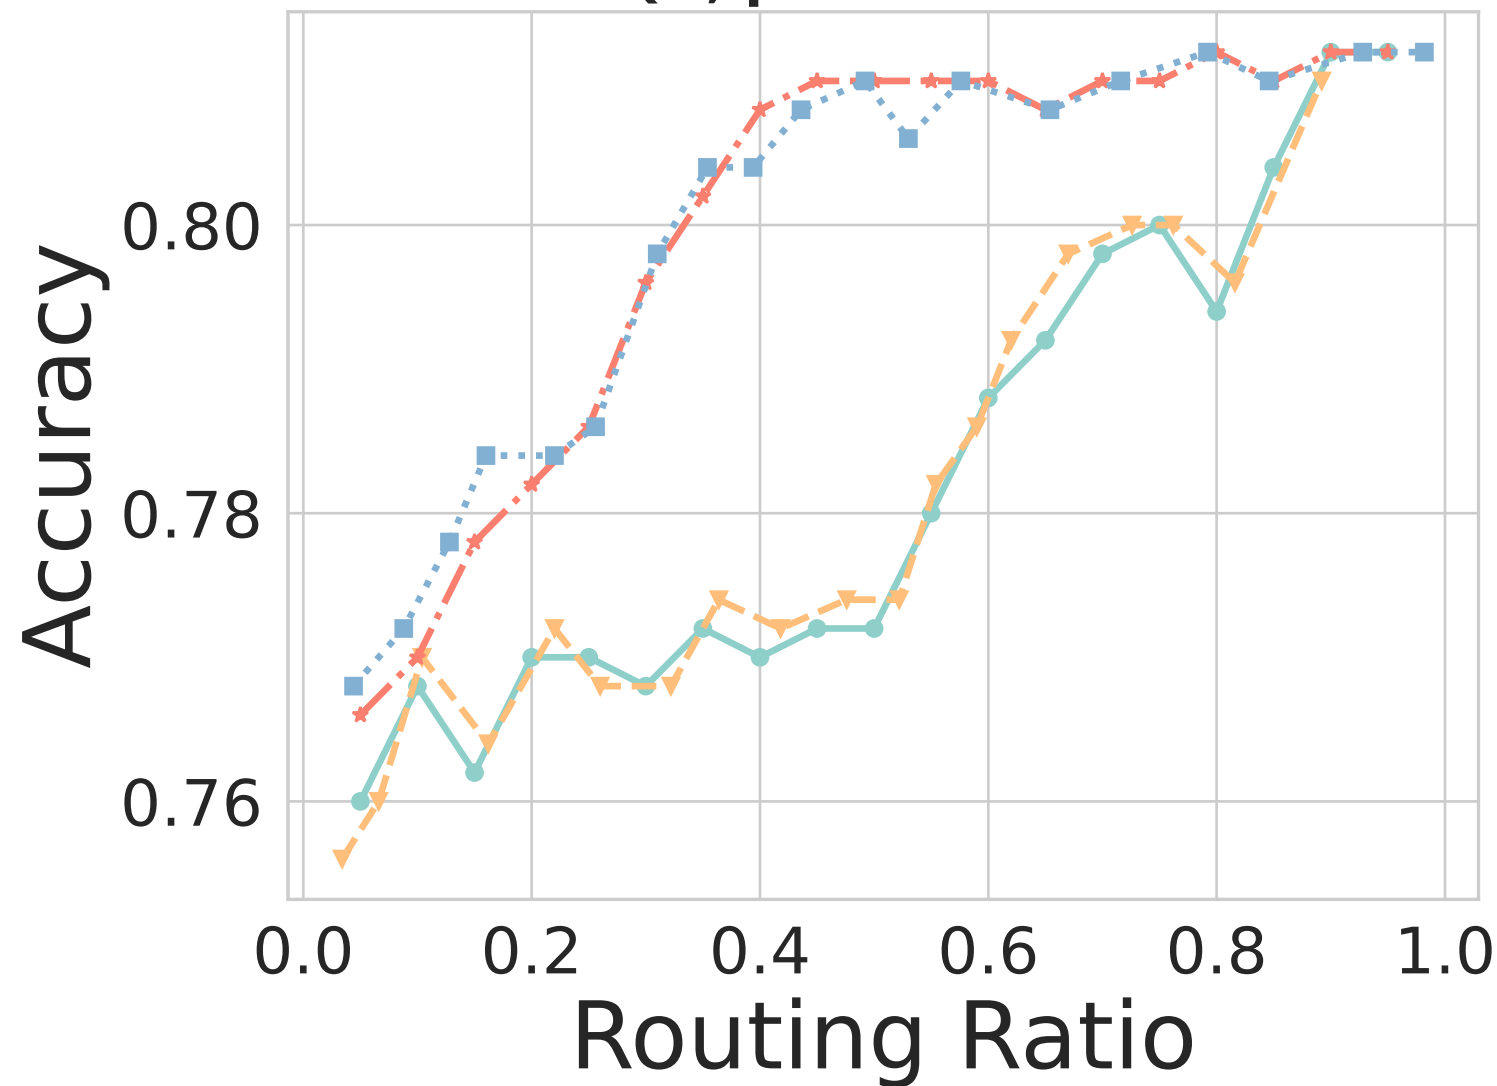

Supplement: supplementary_material [file cali_down_commonsense_qa_phi-3.5-mini_gpt-4.1-mini.pdf › Routing_SLM_LLMs/Proxy_routing_prediction/to_gpt-4.1-mini/commonsense_qa_as_downstream/cali_down_commonsense_qa_phi-3.5-mini_gpt-4.1-mini.pdf]

# CommonsenseQA, phi-4-mini-reasoning to GPT-4.1 mini

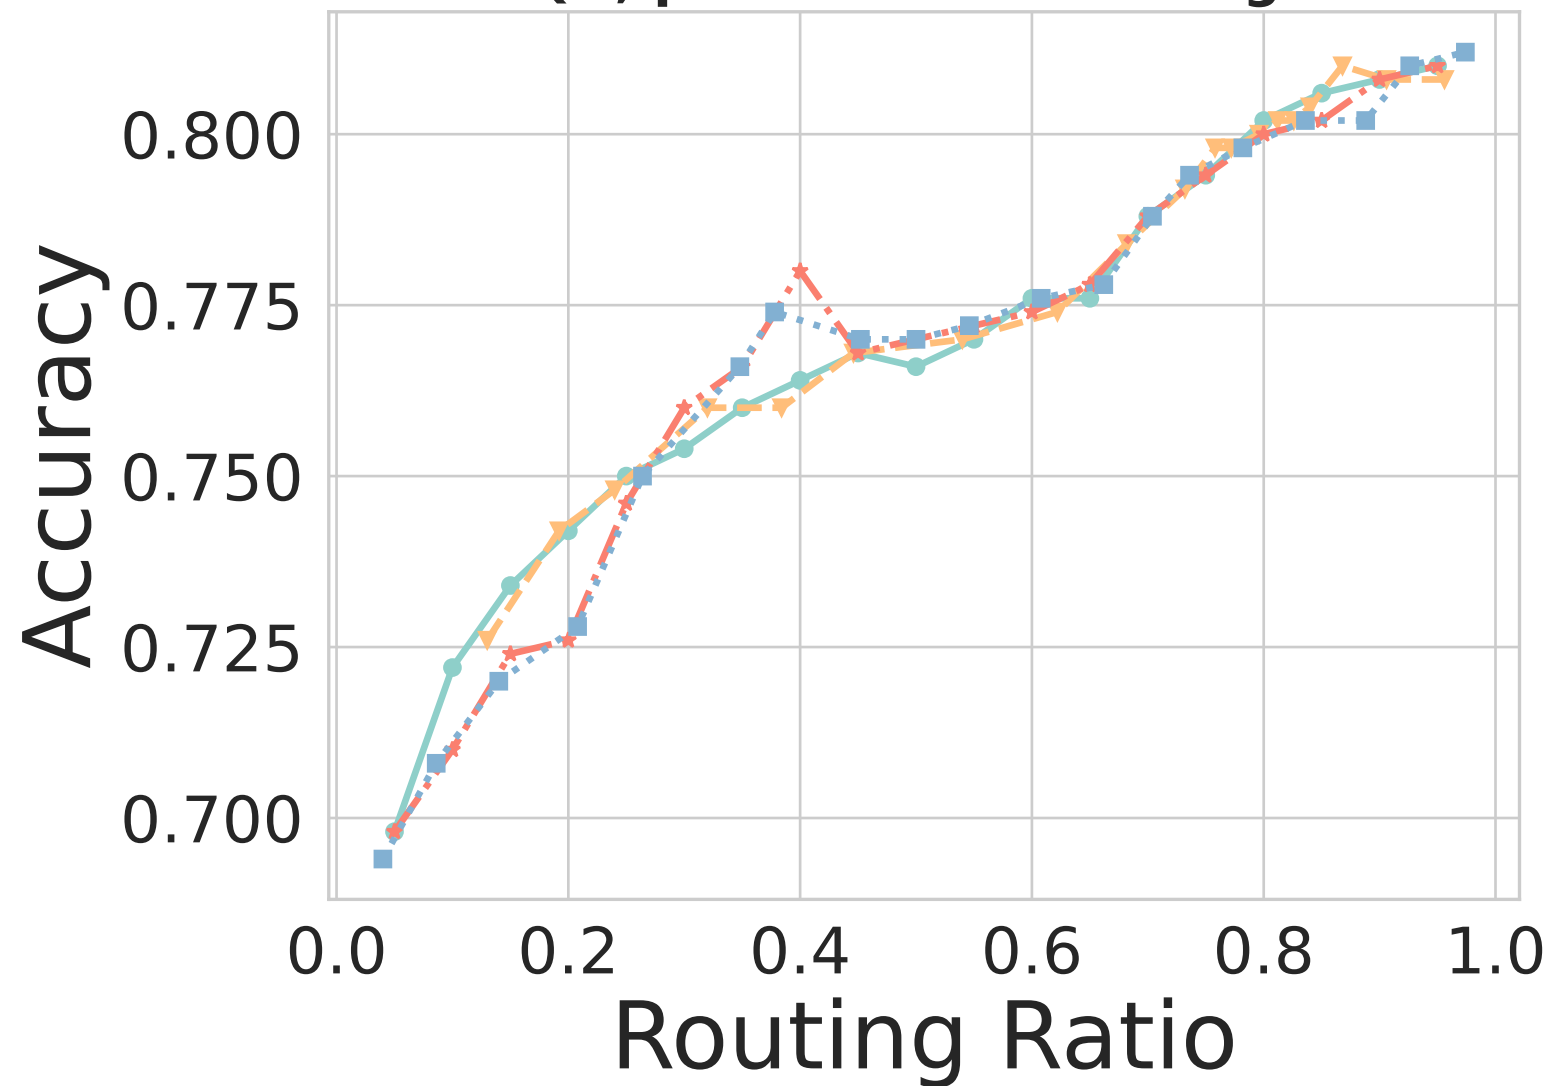

Supplement: supplementary_material [file cali_down_commonsense_qa_phi-4-mini-reasoning_gpt-4.1-mini.pdf › Routing_SLM_LLMs/Proxy_routing_prediction/to_gpt-4.1-mini/commonsense_qa_as_downstream/cali_down_commonsense_qa_phi-4-mini-reasoning_gpt-4.1-mini.pdf]

CommonsenseQA, qwen-2.5-7b to GPT-4.1 mini

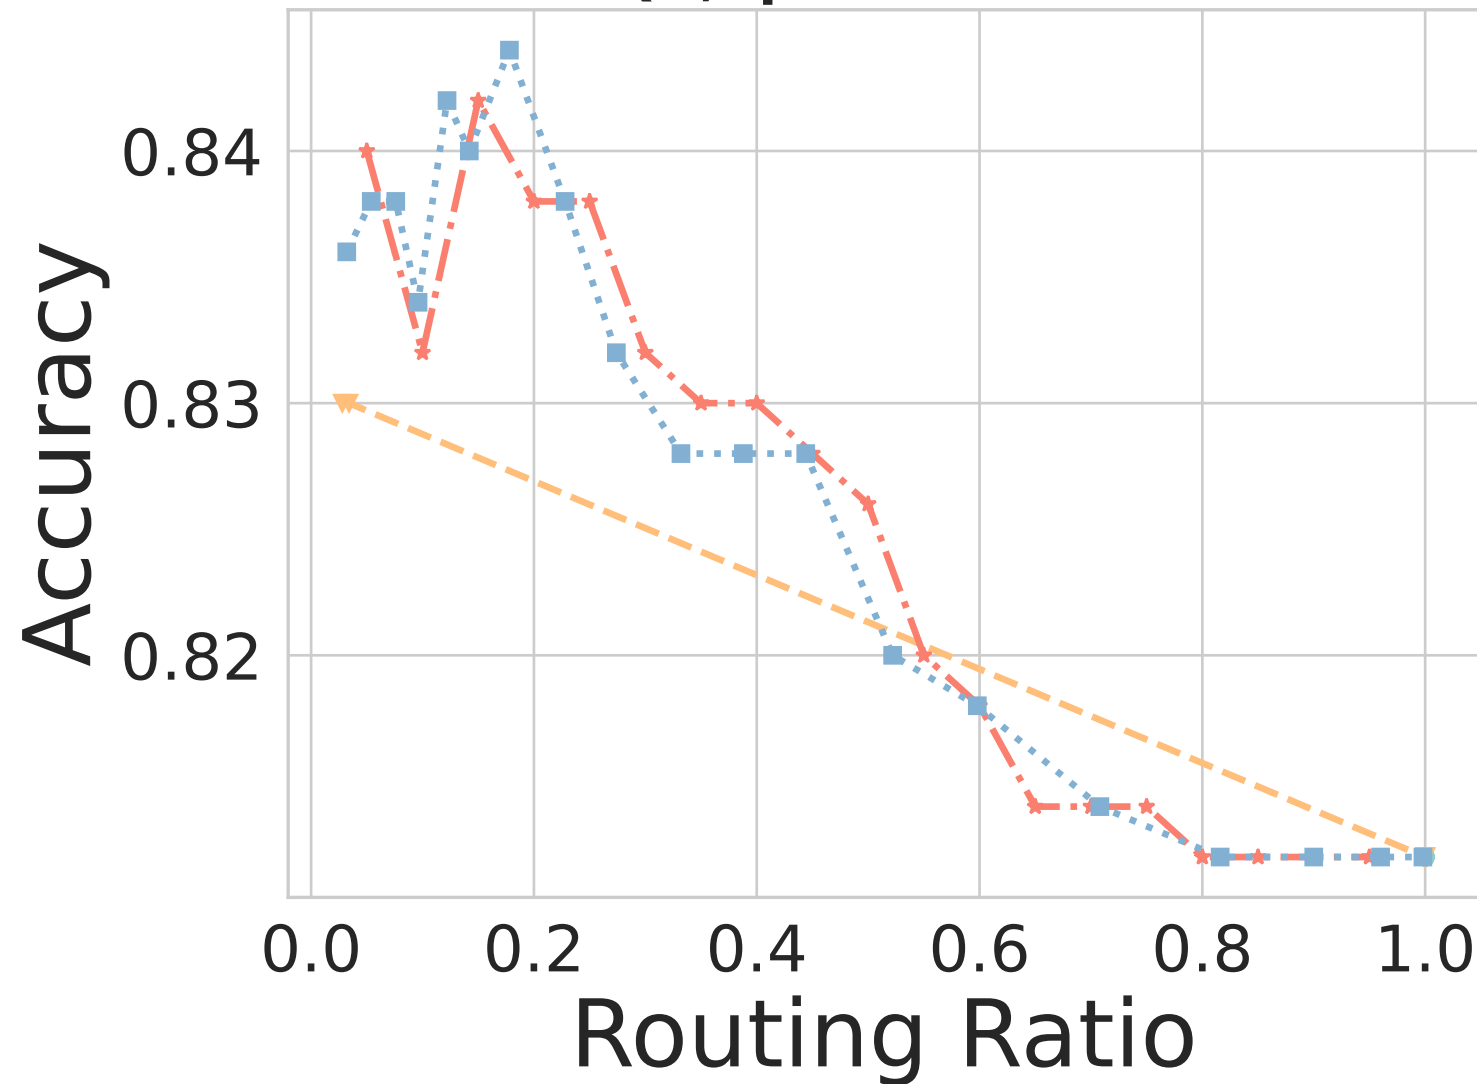

Supplement: supplementary_material [file cali_down_commonsense_qa_qwen-2.5-7b_gpt-4.1-mini.pdf › Routing_SLM_LLMs/Proxy_routing_prediction/to_gpt-4.1-mini/commonsense_qa_as_downstream/cali_down_commonsense_qa_qwen-2.5-7b_gpt-4.1-mini.pdf]

**CommonsenseQA, rwkv to GPT-4.1 mini**

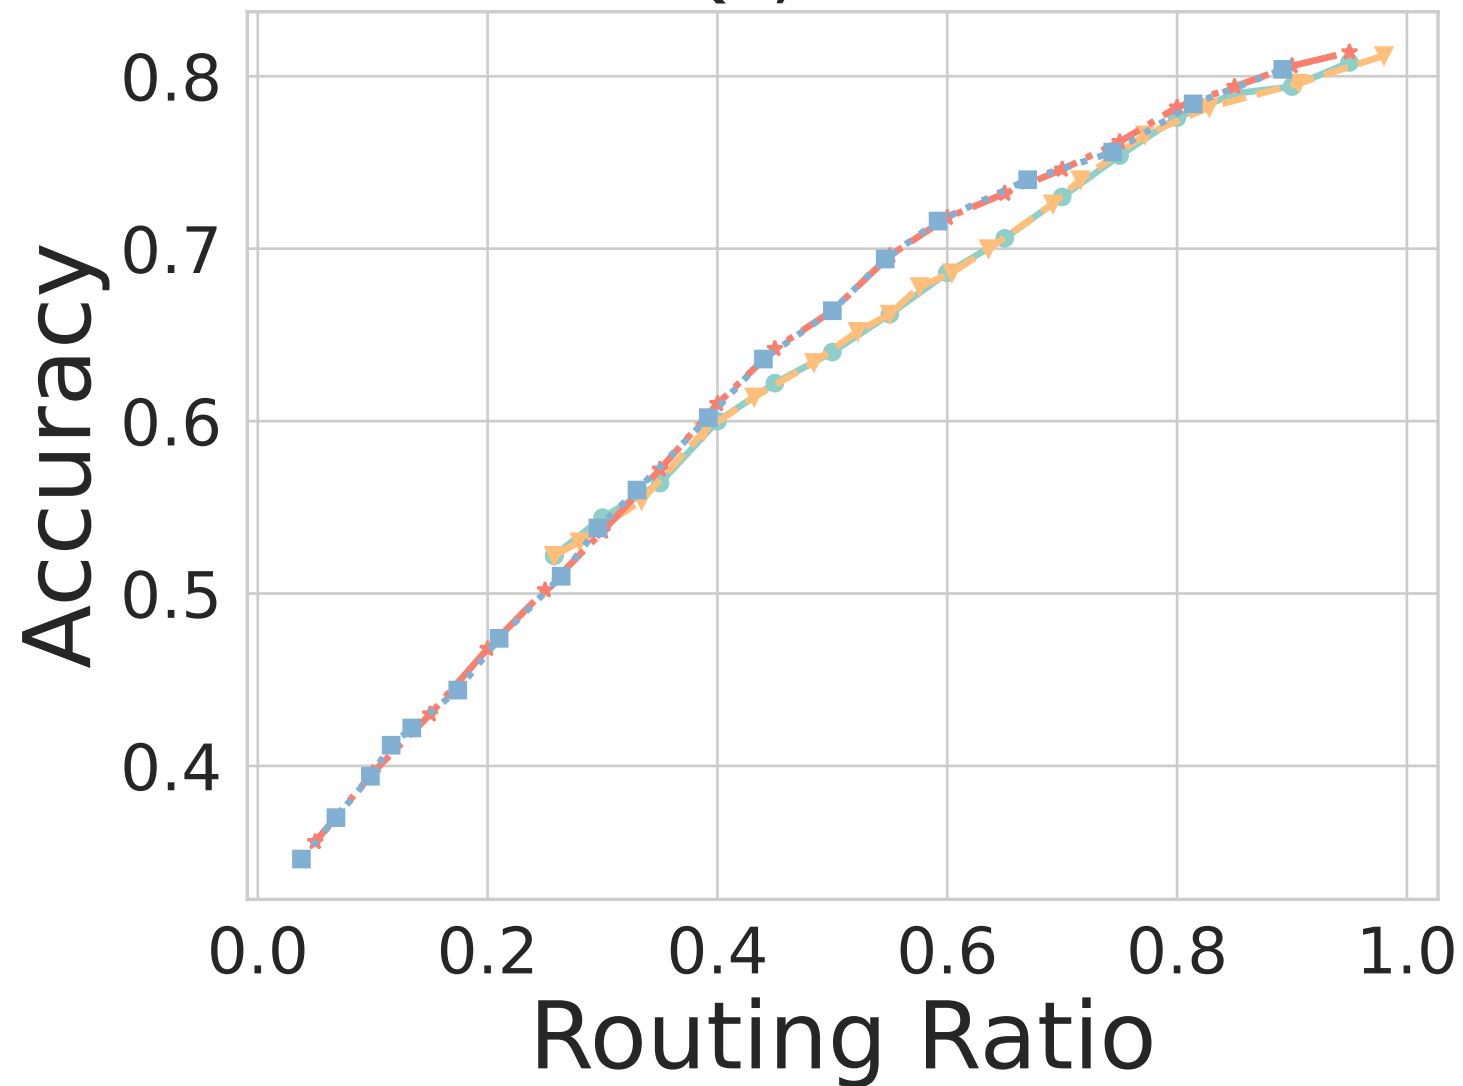

Supplement: supplementary_material [file cali_down_commonsense_qa_rwkv_gpt-4.1-mini.pdf › Routing_SLM_LLMs/Proxy_routing_prediction/to_gpt-4.1-mini/commonsense_qa_as_downstream/cali_down_commonsense_qa_rwkv_gpt-4.1-mini.pdf]

**GSM8K, Qwen3-0.6B to GPT-4.1 mini**

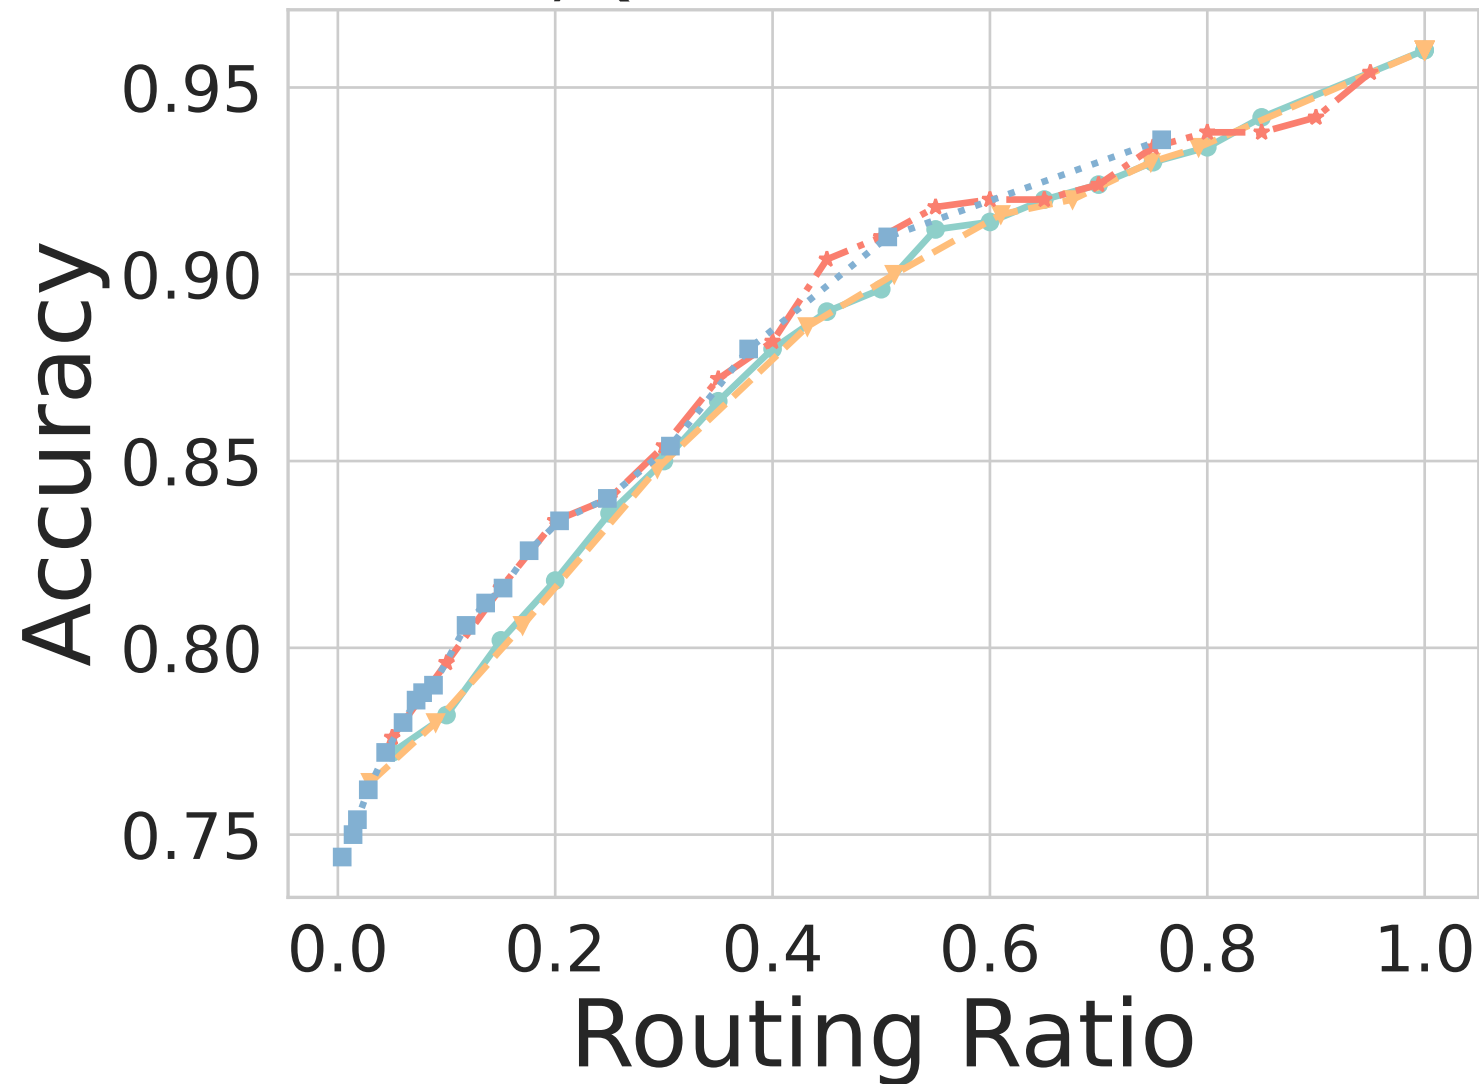

Supplement: supplementary_material [file cali_down_gsm8k_Qwen3-0.6B_gpt-4.1-mini.pdf › Routing_SLM_LLMs/Proxy_routing_prediction/to_gpt-4.1-mini/gsm8k_as_downstream/cali_down_gsm8k_Qwen3-0.6B_gpt-4.1-mini.pdf]

**GSM8K, Qwen3-1.7B to GPT-4.1 mini**

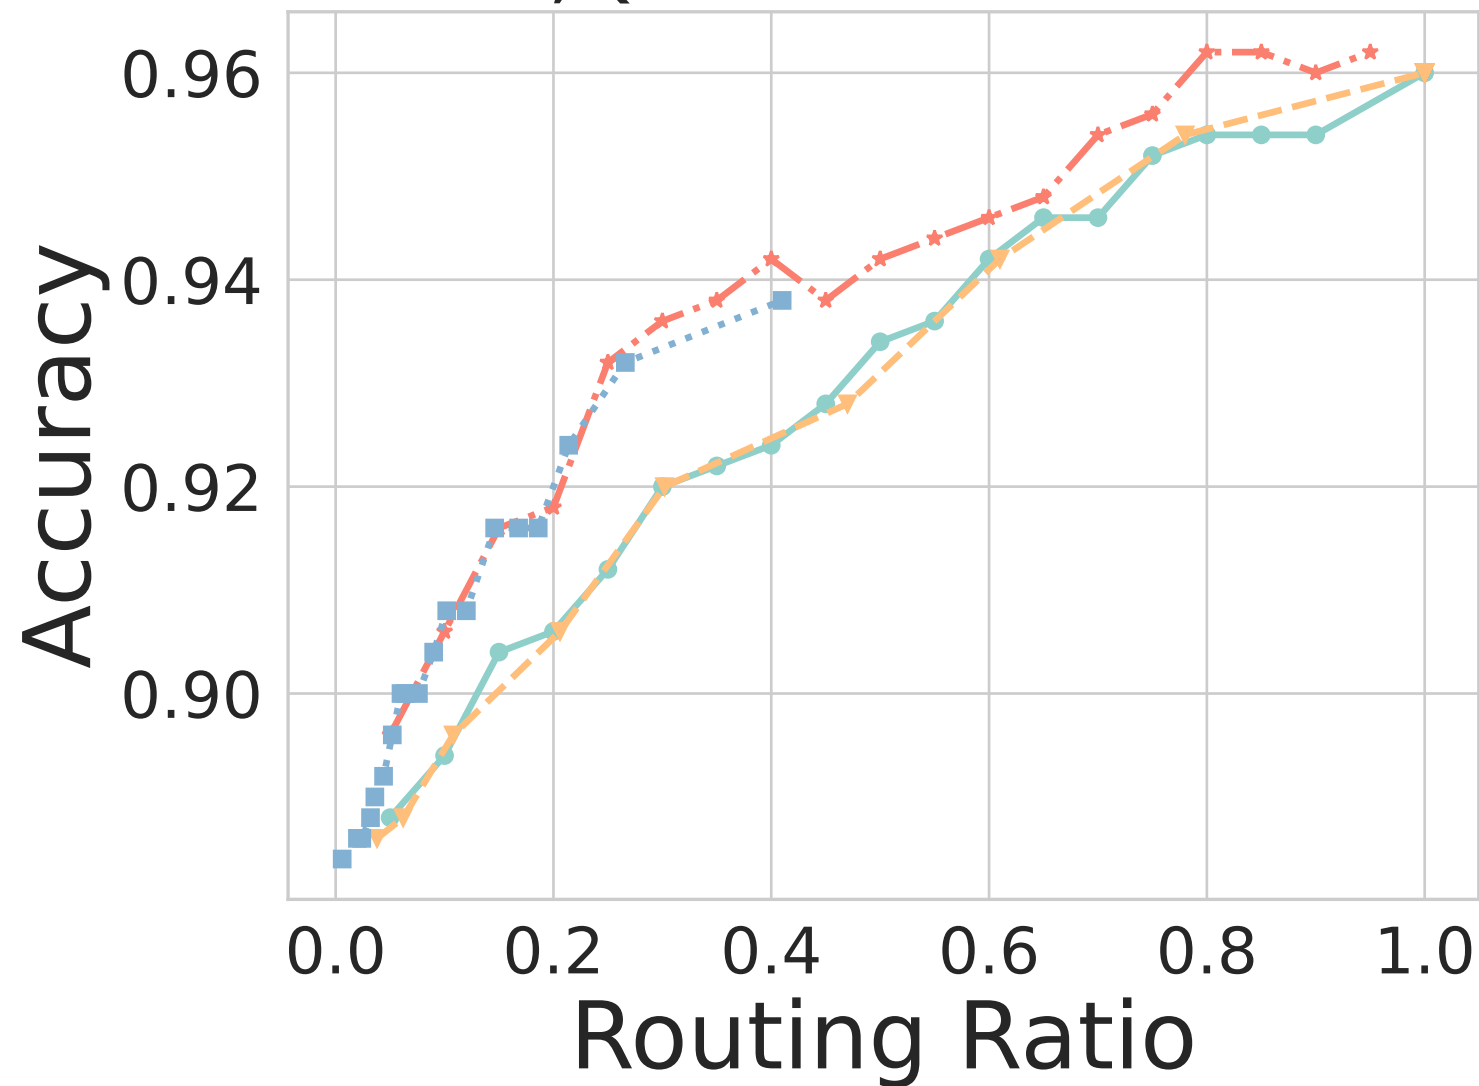

Supplement: supplementary_material [file cali_down_gsm8k_Qwen3-1.7B_gpt-4.1-mini.pdf › Routing_SLM_LLMs/Proxy_routing_prediction/to_gpt-4.1-mini/gsm8k_as_downstream/cali_down_gsm8k_Qwen3-1.7B_gpt-4.1-mini.pdf]

**GSM8K, Qwen3-4B to GPT-4.1 mini**

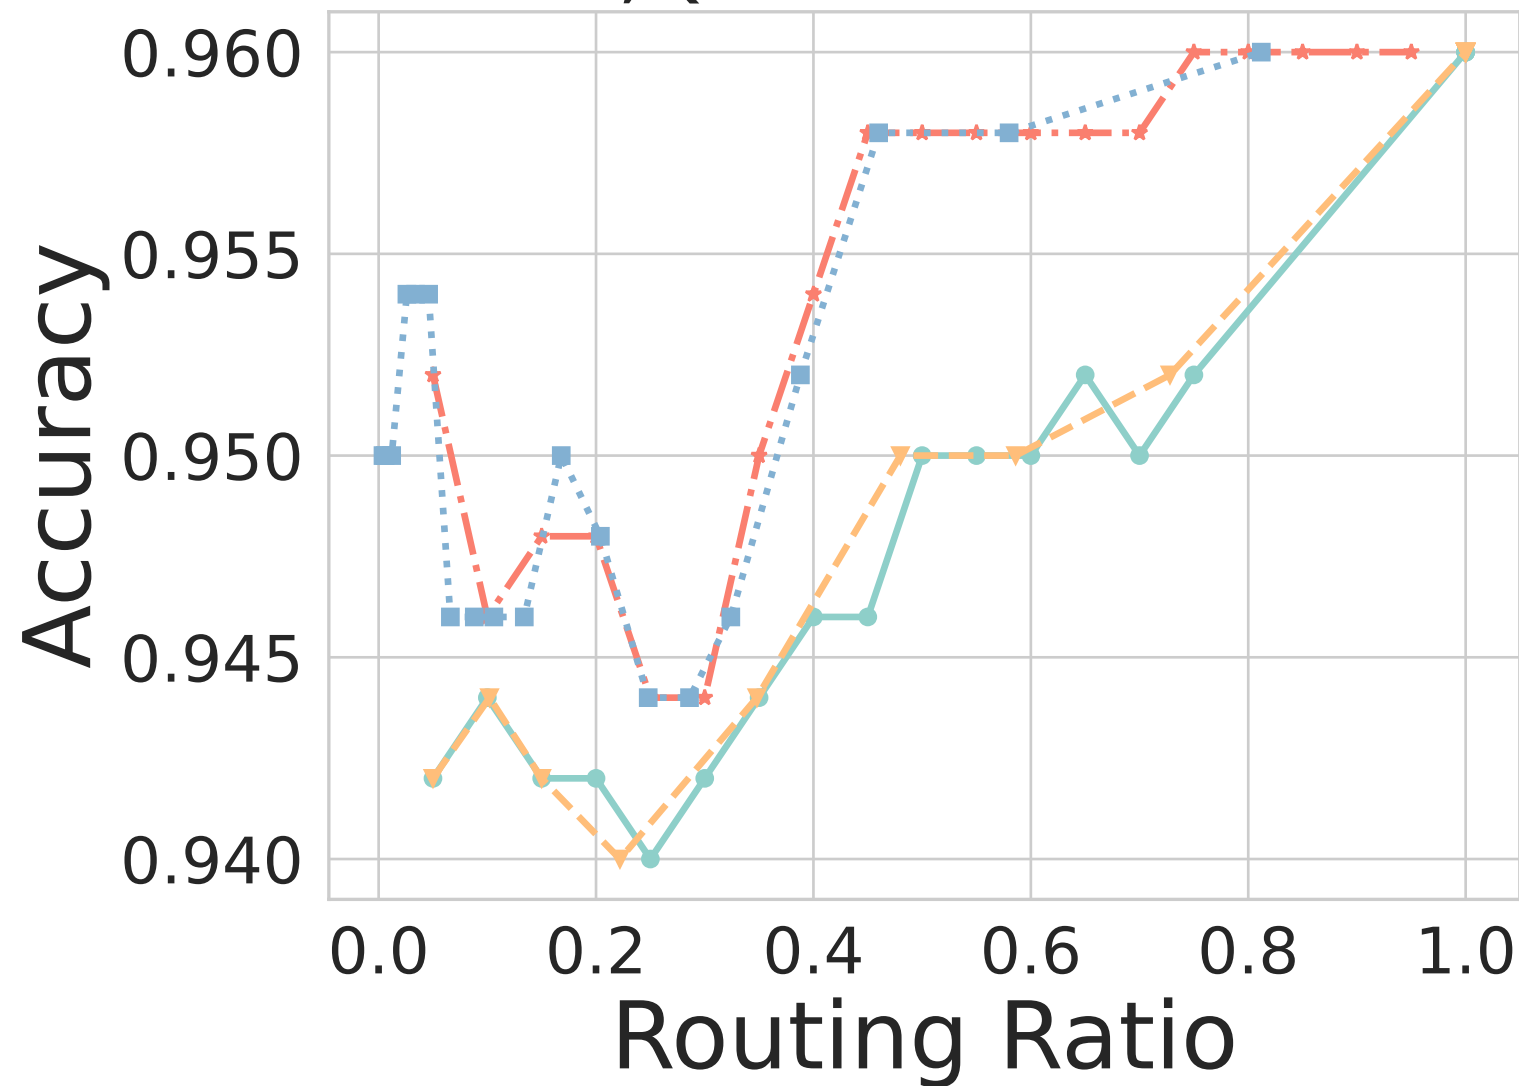

Supplement: supplementary_material [file cali_down_gsm8k_Qwen3-4B_gpt-4.1-mini.pdf › Routing_SLM_LLMs/Proxy_routing_prediction/to_gpt-4.1-mini/gsm8k_as_downstream/cali_down_gsm8k_Qwen3-4B_gpt-4.1-mini.pdf]

**GSM8K, granite-3.1-8b to GPT-4.1 mini**

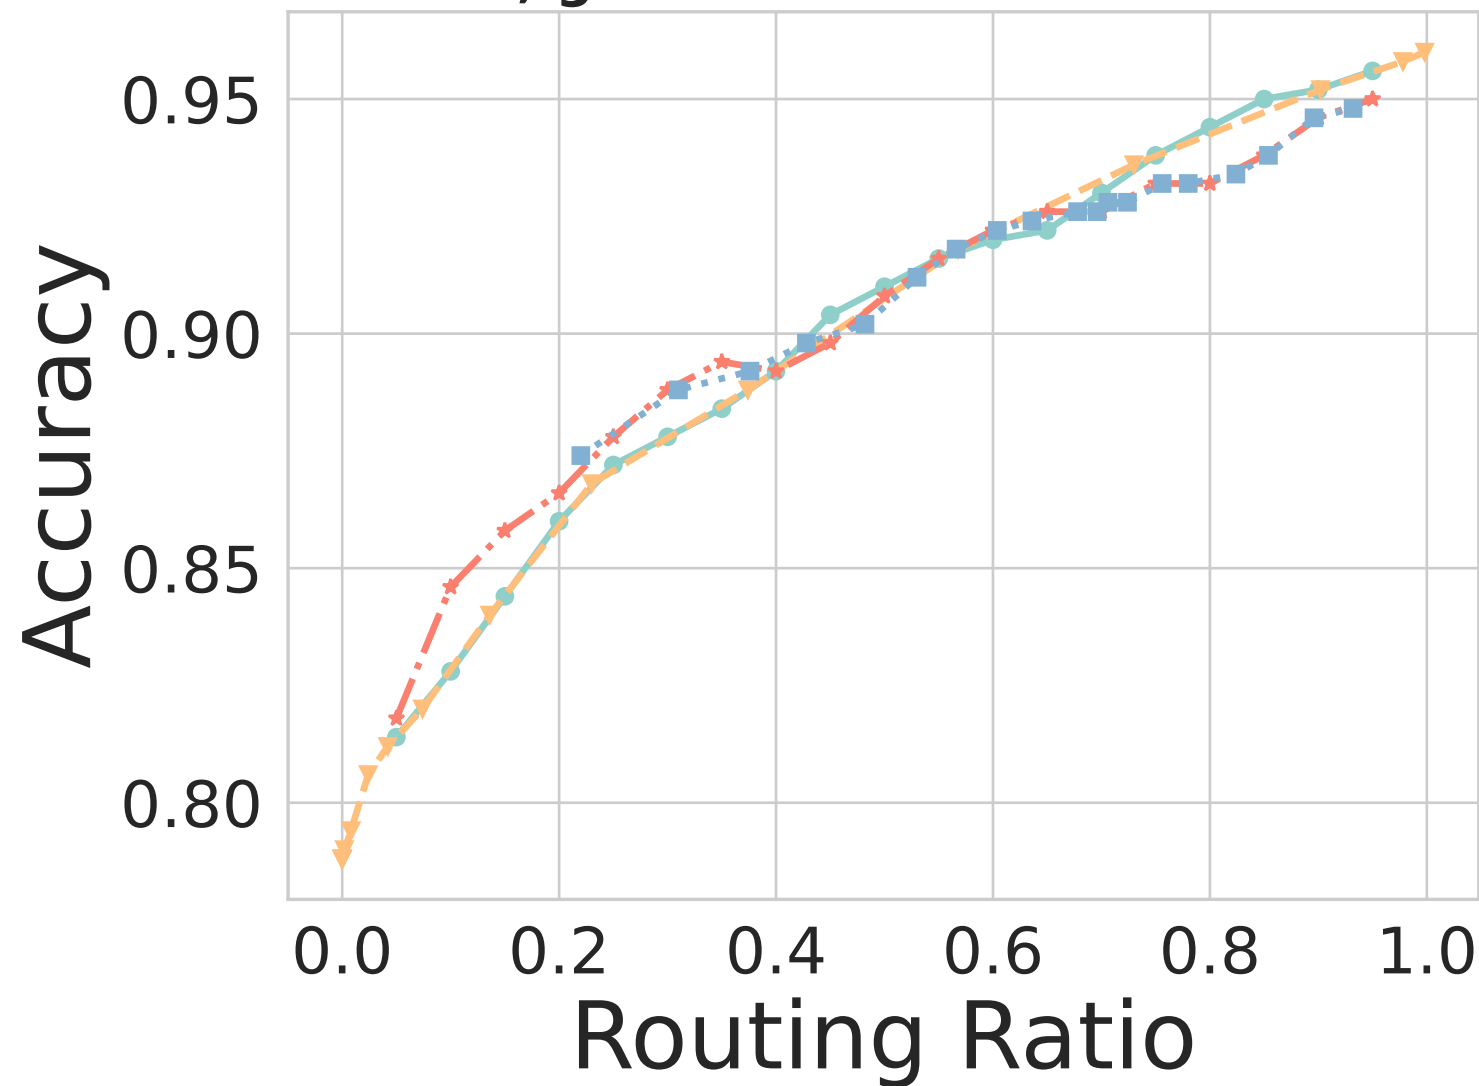

Supplement: supplementary_material [file cali_down_gsm8k_granite-3.1-8b_gpt-4.1-mini.pdf › Routing_SLM_LLMs/Proxy_routing_prediction/to_gpt-4.1-mini/gsm8k_as_downstream/cali_down_gsm8k_granite-3.1-8b_gpt-4.1-mini.pdf]

**GSM8K, llama-3.1-8b to GPT-4.1 mini**

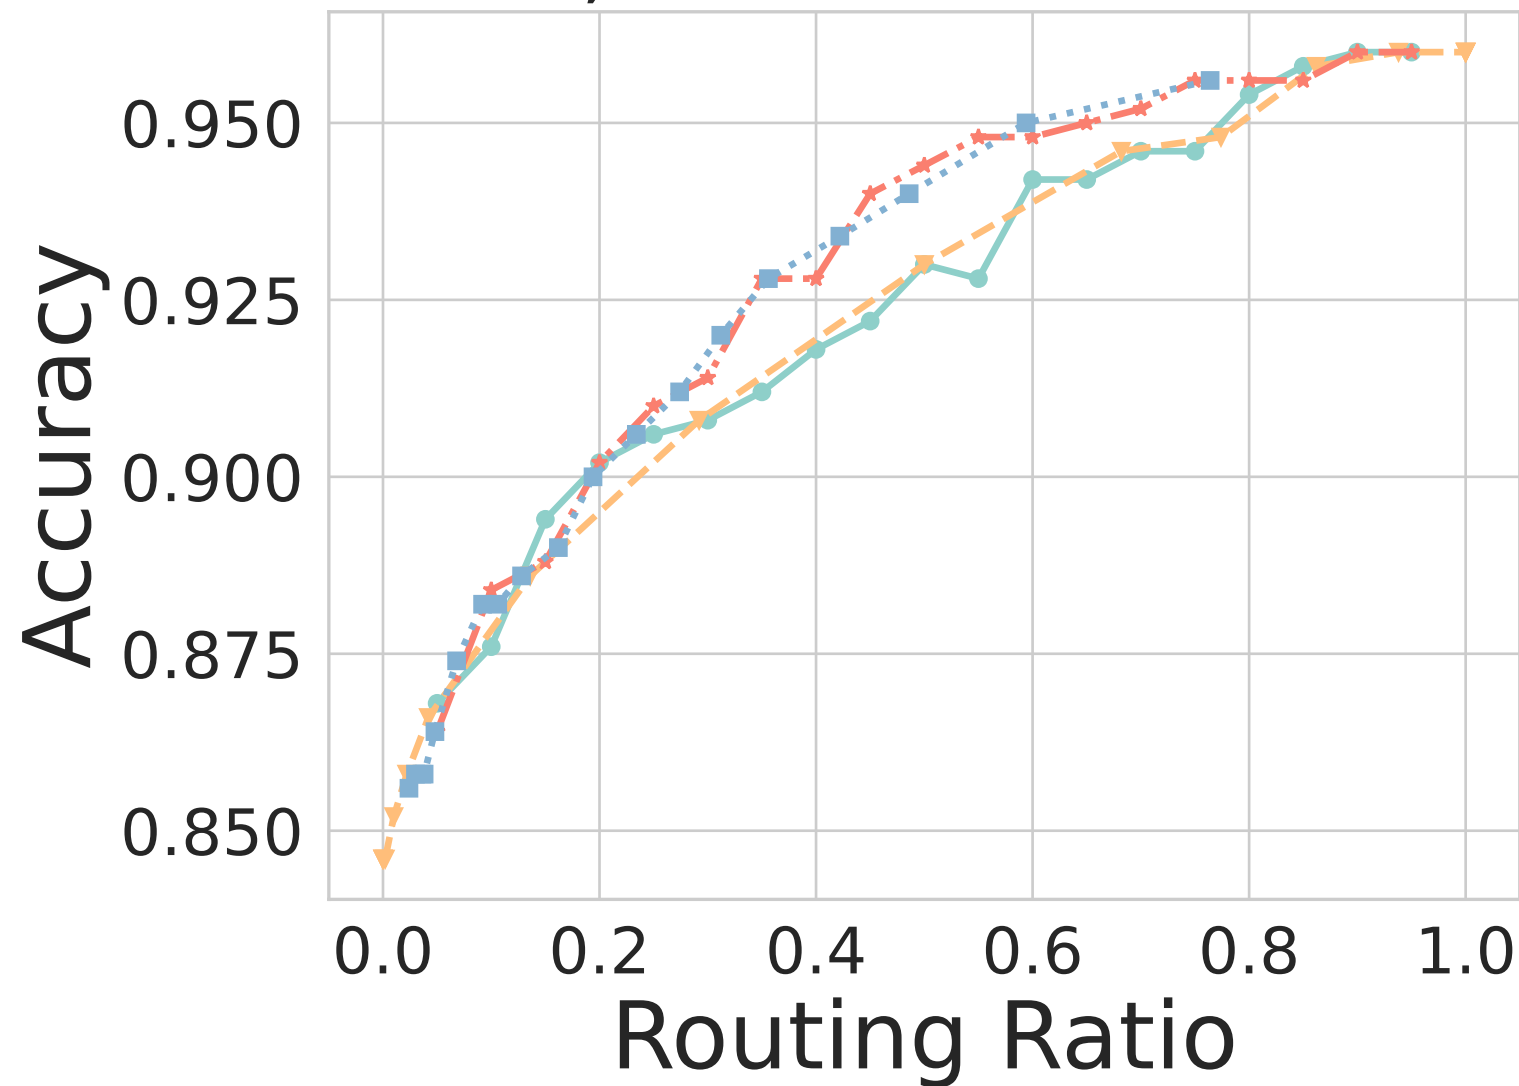

Supplement: supplementary_material [file cali_down_gsm8k_llama-3.1-8b_gpt-4.1-mini.pdf › Routing_SLM_LLMs/Proxy_routing_prediction/to_gpt-4.1-mini/gsm8k_as_downstream/cali_down_gsm8k_llama-3.1-8b_gpt-4.1-mini.pdf]

**GSM8K, llama-3.2-1b to GPT-4.1 mini**

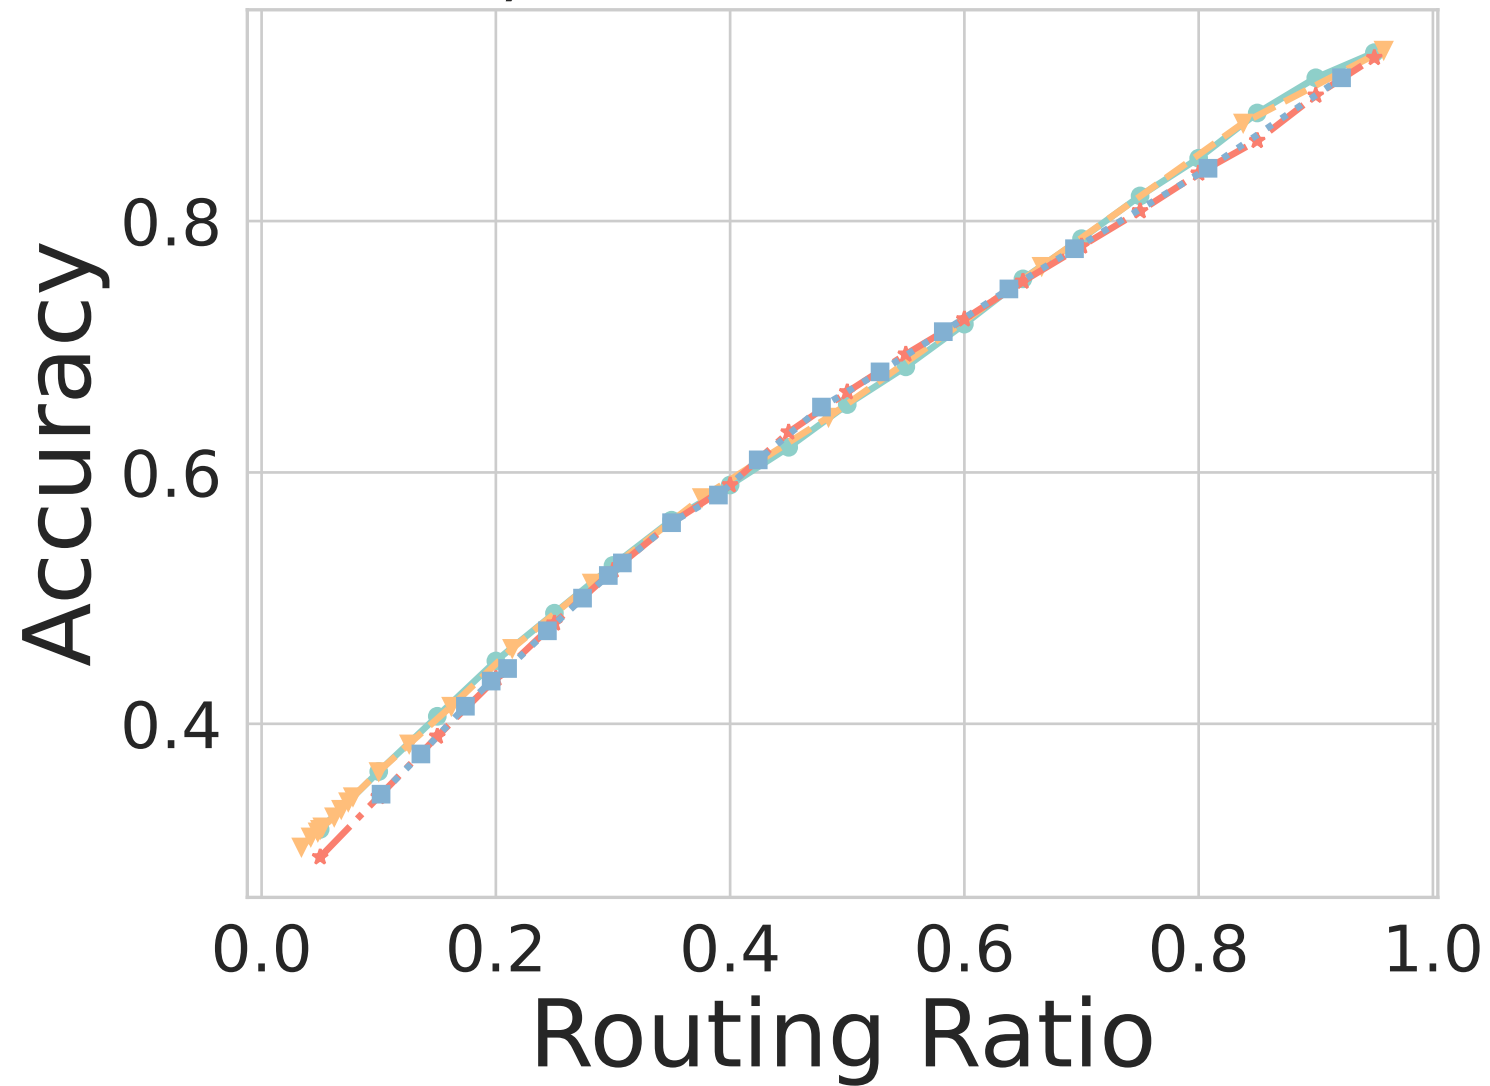

Supplement: supplementary_material [file cali_down_gsm8k_llama-3.2-1b_gpt-4.1-mini.pdf › Routing_SLM_LLMs/Proxy_routing_prediction/to_gpt-4.1-mini/gsm8k_as_downstream/cali_down_gsm8k_llama-3.2-1b_gpt-4.1-mini.pdf]

**GSM8K, llama-3.2-3b to GPT-4.1 mini**

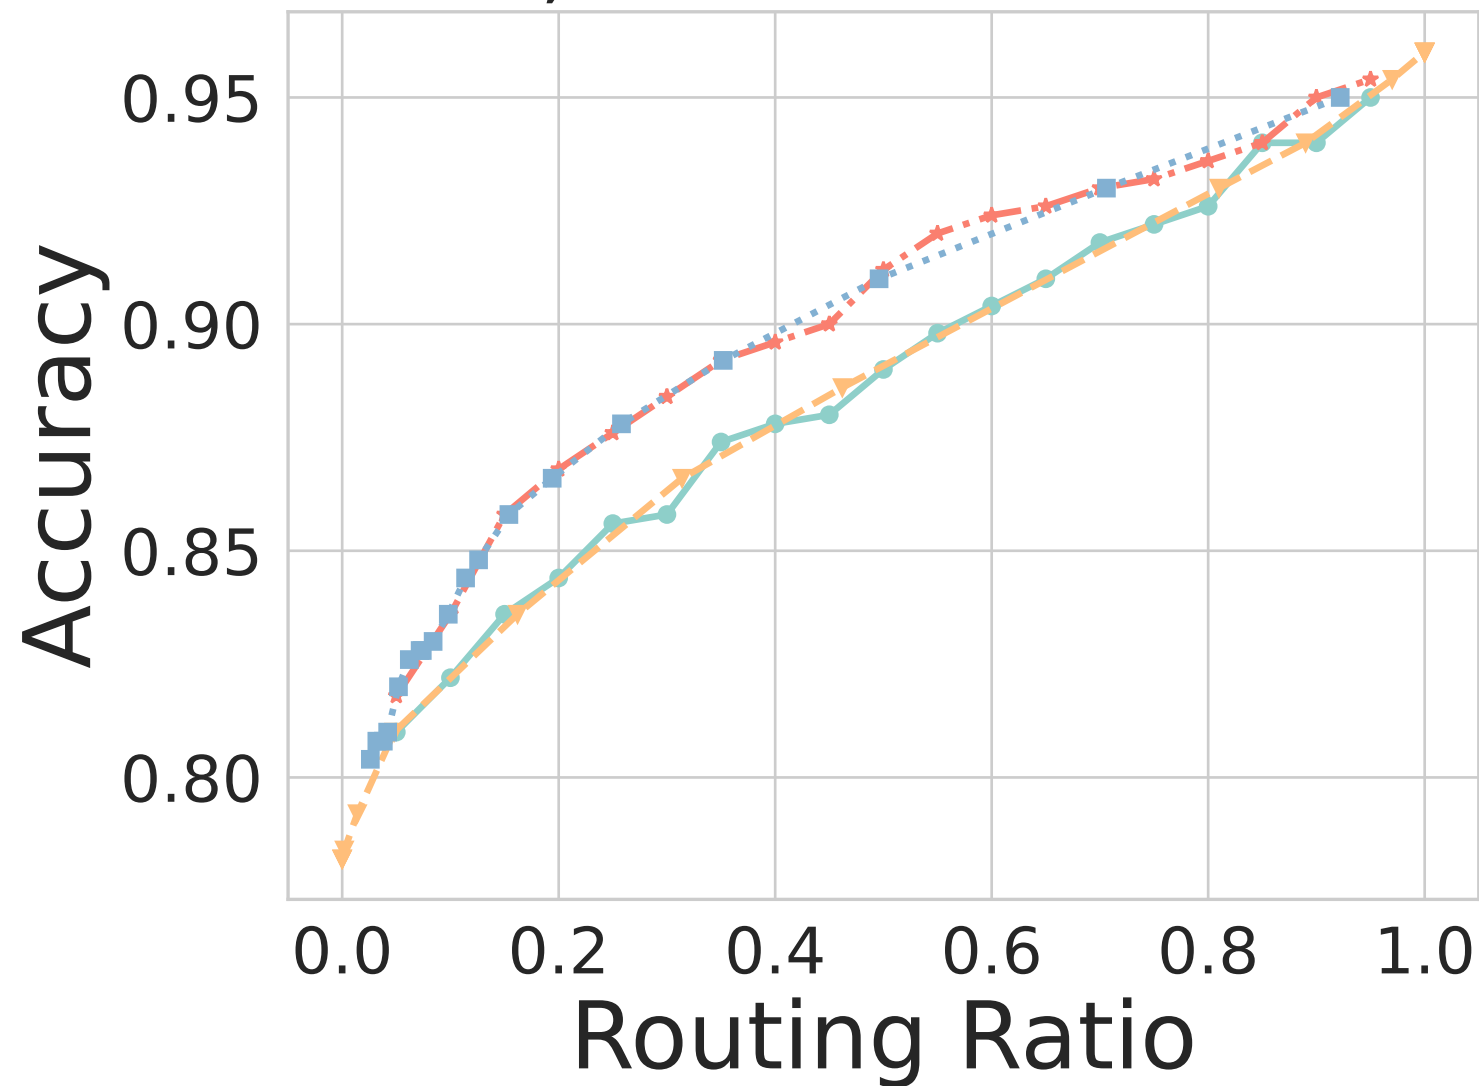

Supplement: supplementary_material [file cali_down_gsm8k_llama-3.2-3b_gpt-4.1-mini.pdf › Routing_SLM_LLMs/Proxy_routing_prediction/to_gpt-4.1-mini/gsm8k_as_downstream/cali_down_gsm8k_llama-3.2-3b_gpt-4.1-mini.pdf]

**GSM8K, mistral-7b to GPT-4.1 mini**

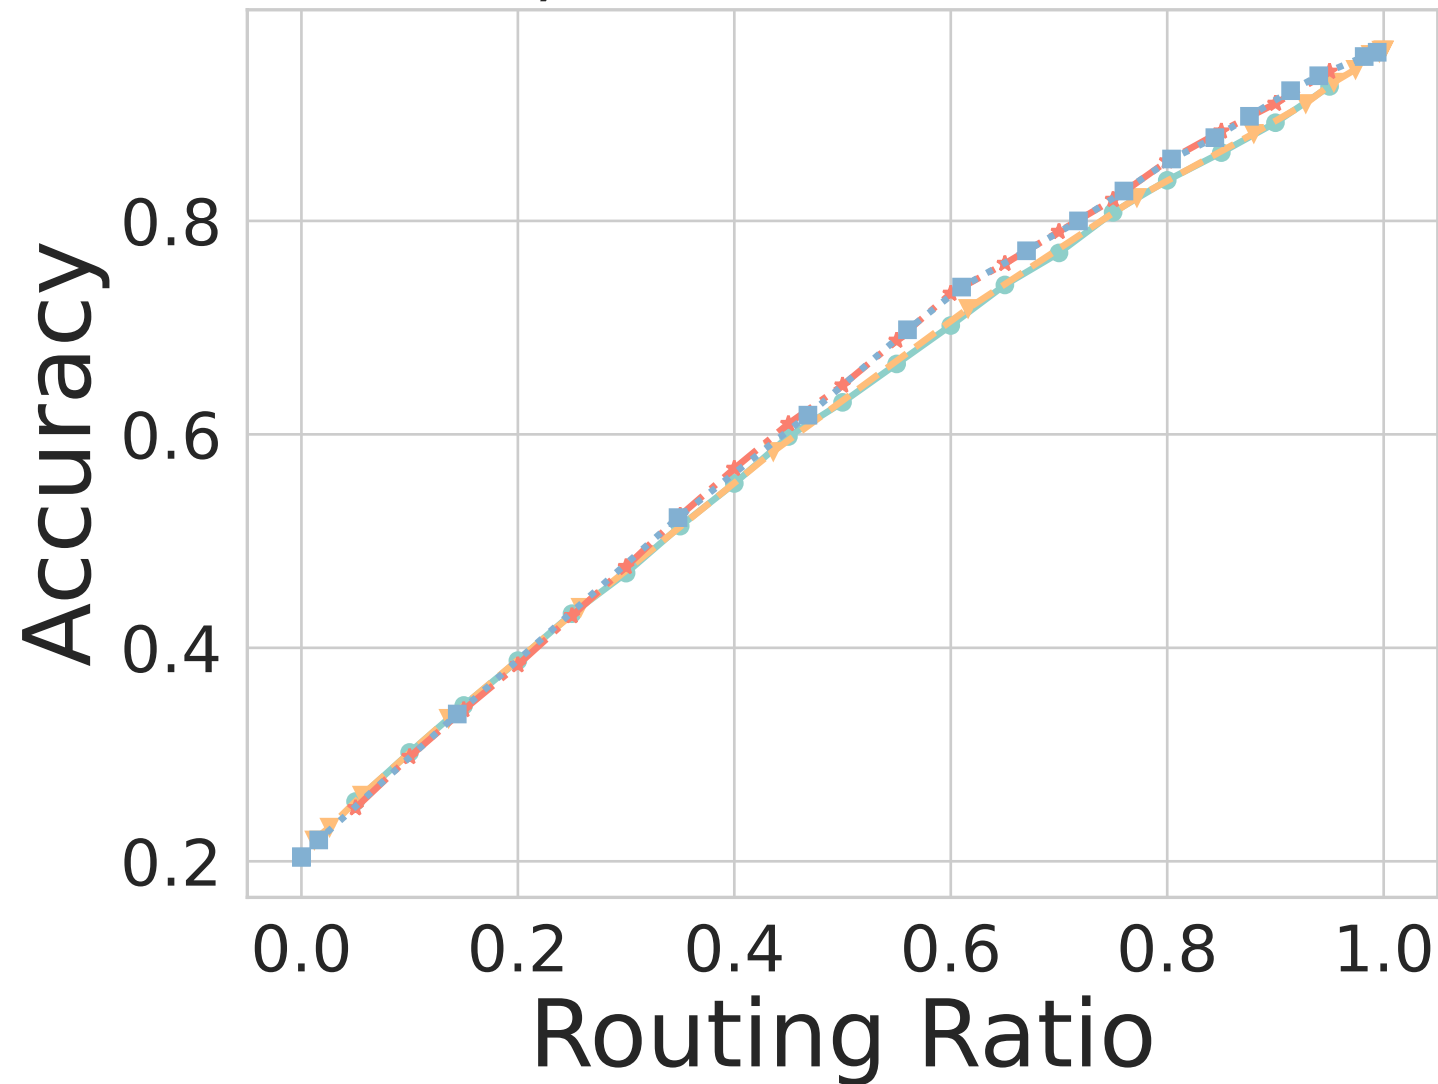

Supplement: supplementary_material [file cali_down_gsm8k_mistral-7b_gpt-4.1-mini.pdf › Routing_SLM_LLMs/Proxy_routing_prediction/to_gpt-4.1-mini/gsm8k_as_downstream/cali_down_gsm8k_mistral-7b_gpt-4.1-mini.pdf]

**GSM8K, phi-3.5-mini to GPT-4.1 mini**

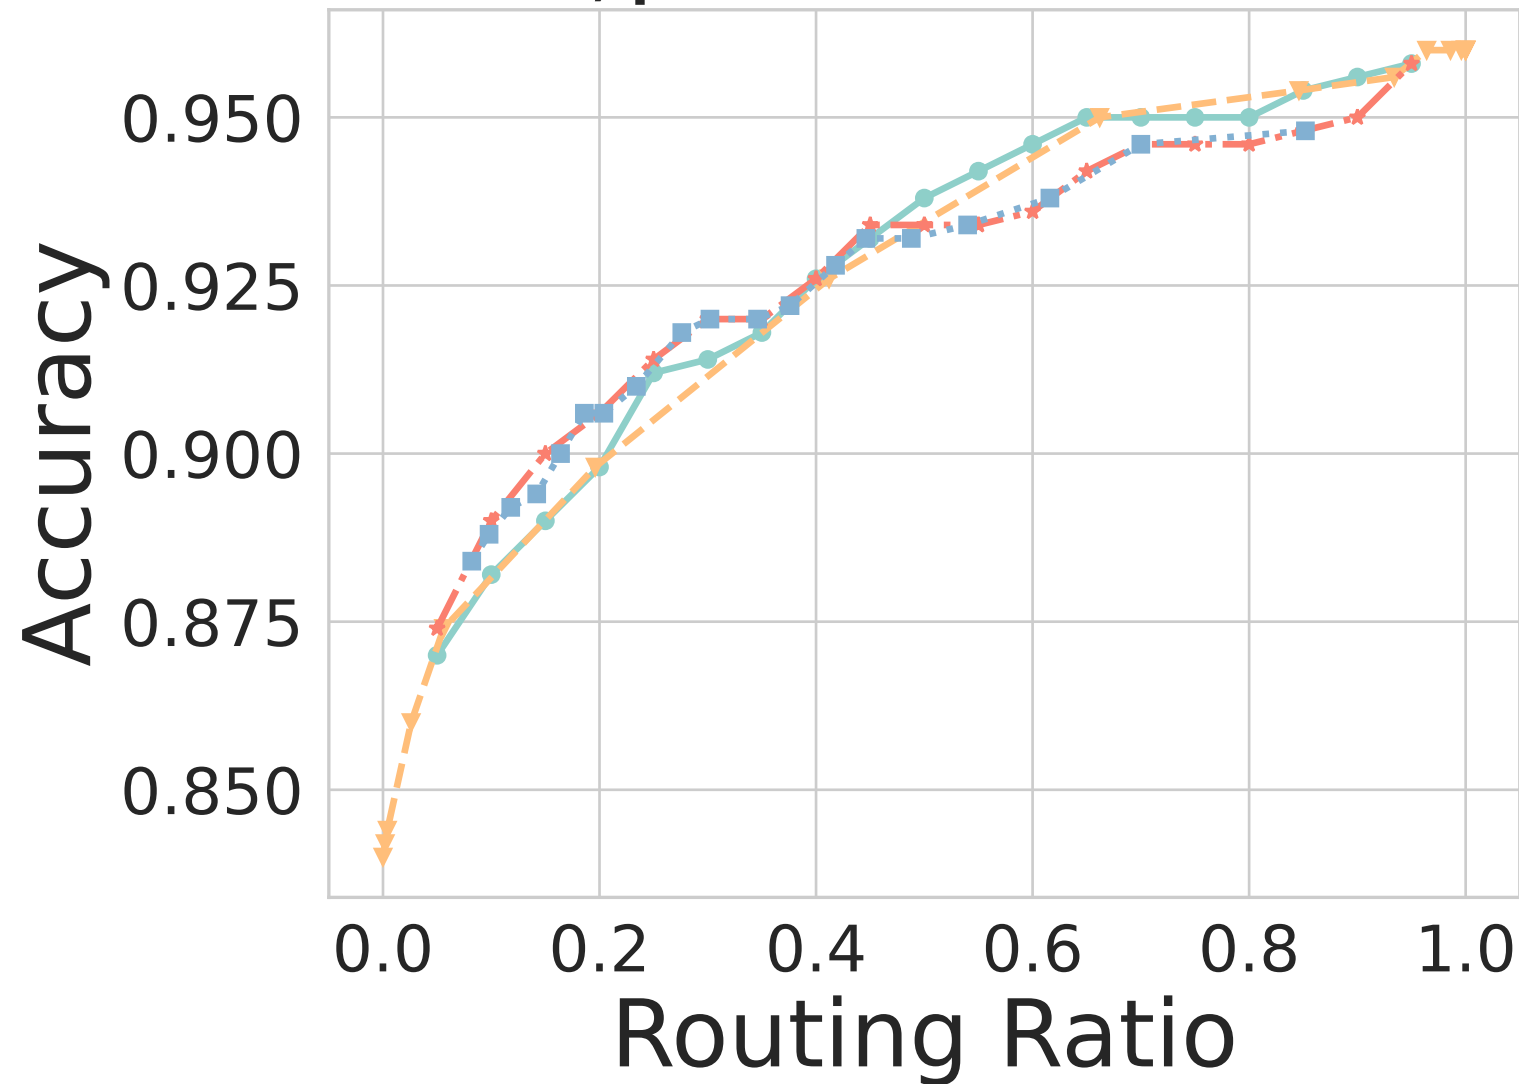

Supplement: supplementary_material [file cali_down_gsm8k_phi-3.5-mini_gpt-4.1-mini.pdf › Routing_SLM_LLMs/Proxy_routing_prediction/to_gpt-4.1-mini/gsm8k_as_downstream/cali_down_gsm8k_phi-3.5-mini_gpt-4.1-mini.pdf]

# GSM8K, phi-4-mini-reasoning to GPT-4.1 mini

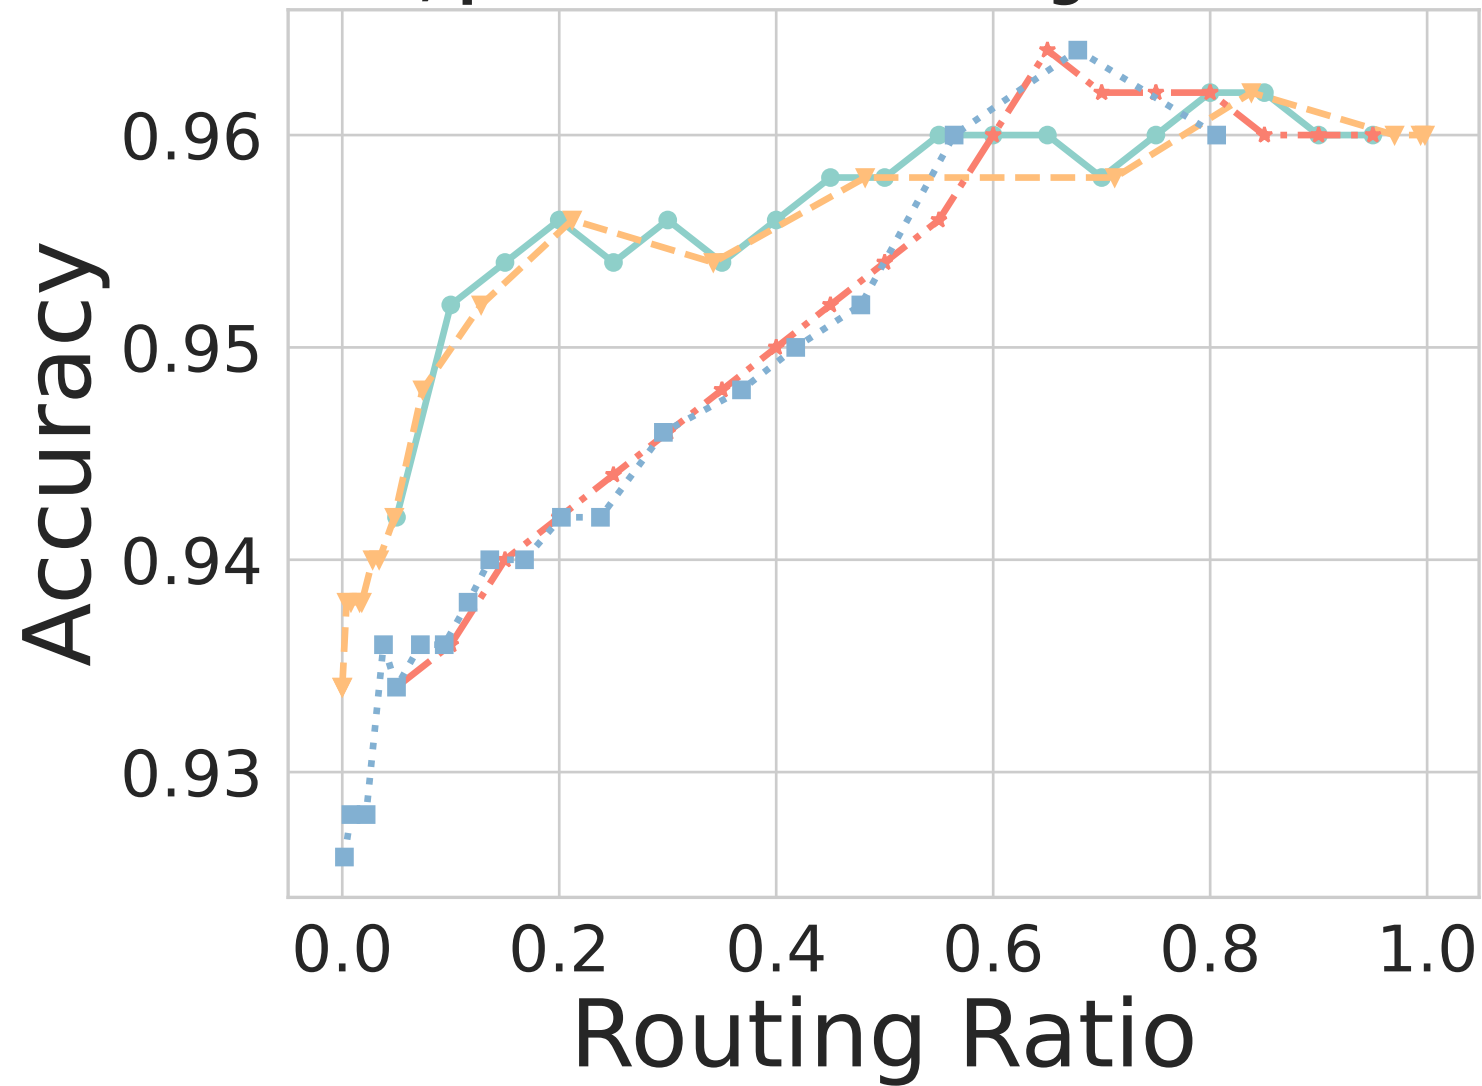

Supplement: supplementary_material [file cali_down_gsm8k_phi-4-mini-reasoning_gpt-4.1-mini.pdf › Routing_SLM_LLMs/Proxy_routing_prediction/to_gpt-4.1-mini/gsm8k_as_downstream/cali_down_gsm8k_phi-4-mini-reasoning_gpt-4.1-mini.pdf]

**GSM8K, qwen-2.5-7b to GPT-4.1 mini**

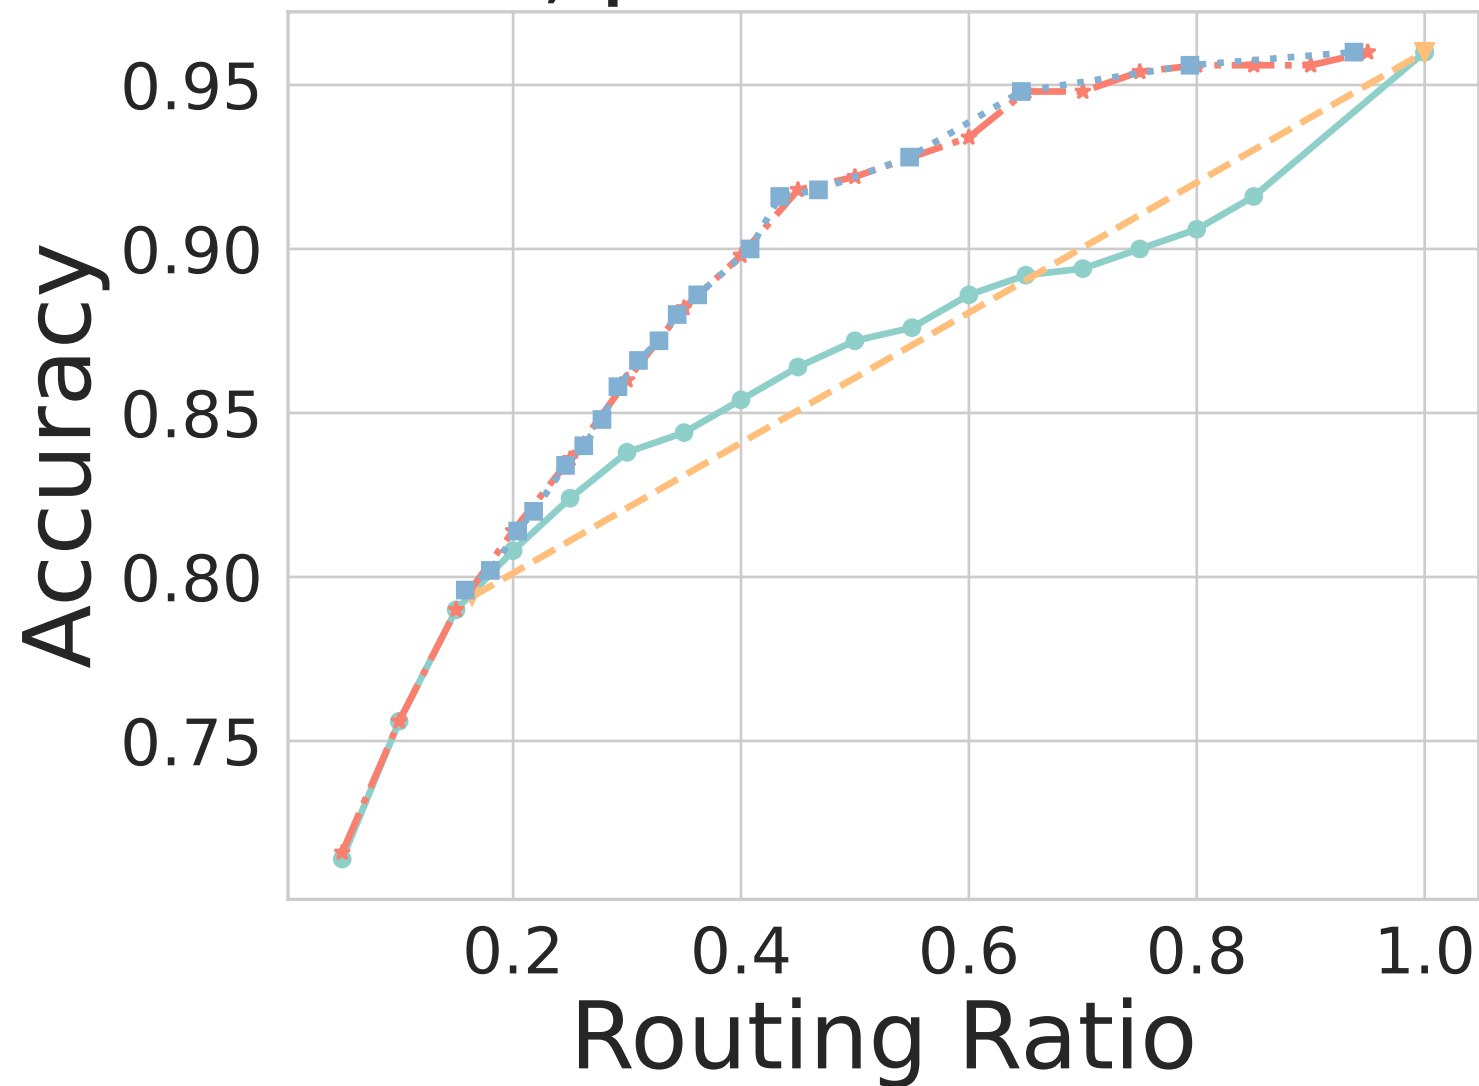

Supplement: supplementary_material [file cali_down_gsm8k_qwen-2.5-7b_gpt-4.1-mini.pdf › Routing_SLM_LLMs/Proxy_routing_prediction/to_gpt-4.1-mini/gsm8k_as_downstream/cali_down_gsm8k_qwen-2.5-7b_gpt-4.1-mini.pdf]

**GSM8K, rwkv to GPT-4.1 mini**

Accuracy

1.0

0.8

0.6

0.4

0.2

0.0

0.2

0.4

0.6

0.8

1.0

Routing Ratio

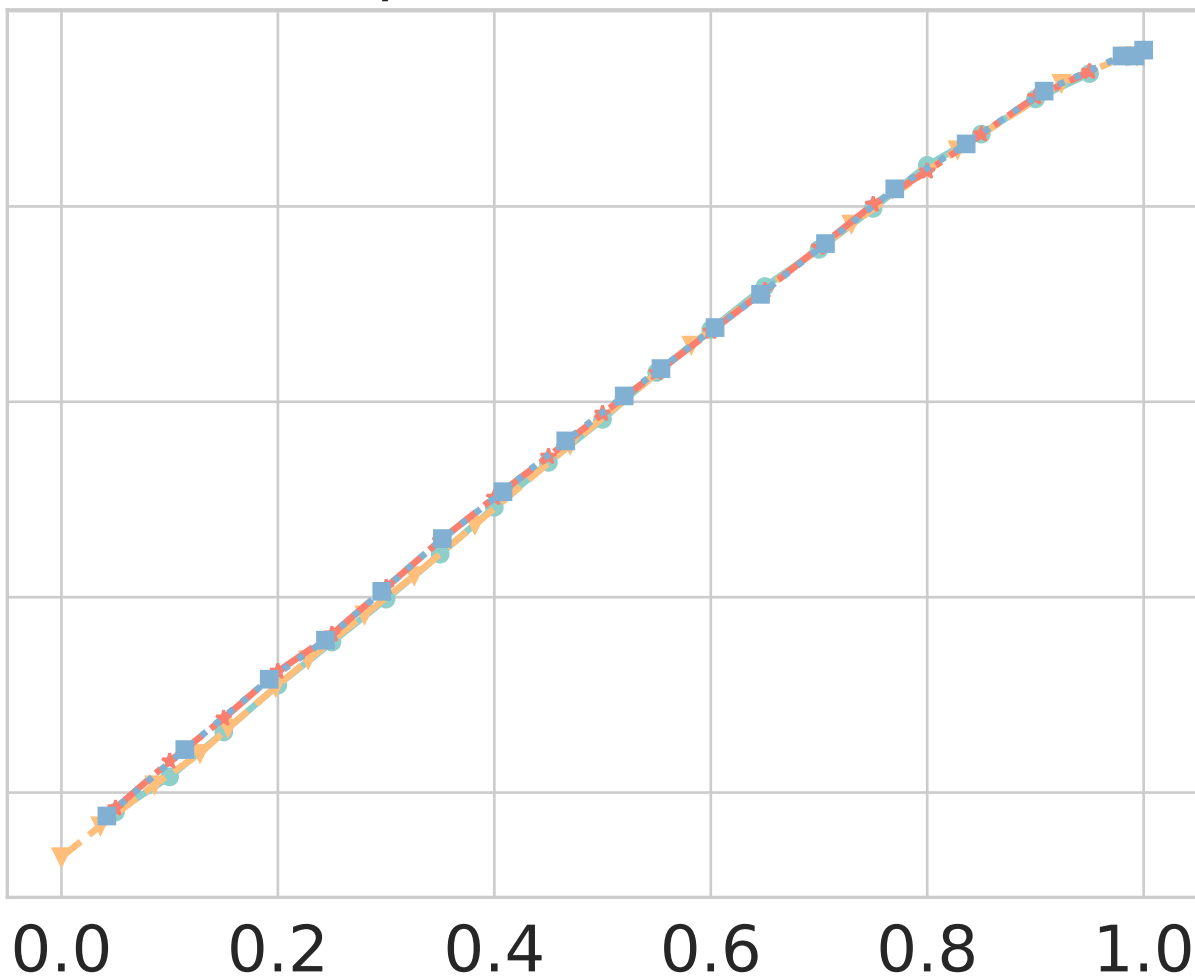

Supplement: supplementary_material [file cali_down_gsm8k_rwkv_gpt-4.1-mini.pdf › Routing_SLM_LLMs/Proxy_routing_prediction/to_gpt-4.1-mini/gsm8k_as_downstream/cali_down_gsm8k_rwkv_gpt-4.1-mini.pdf]

**HellaSwag, Qwen3-0.6B to GPT-4.1 mini**

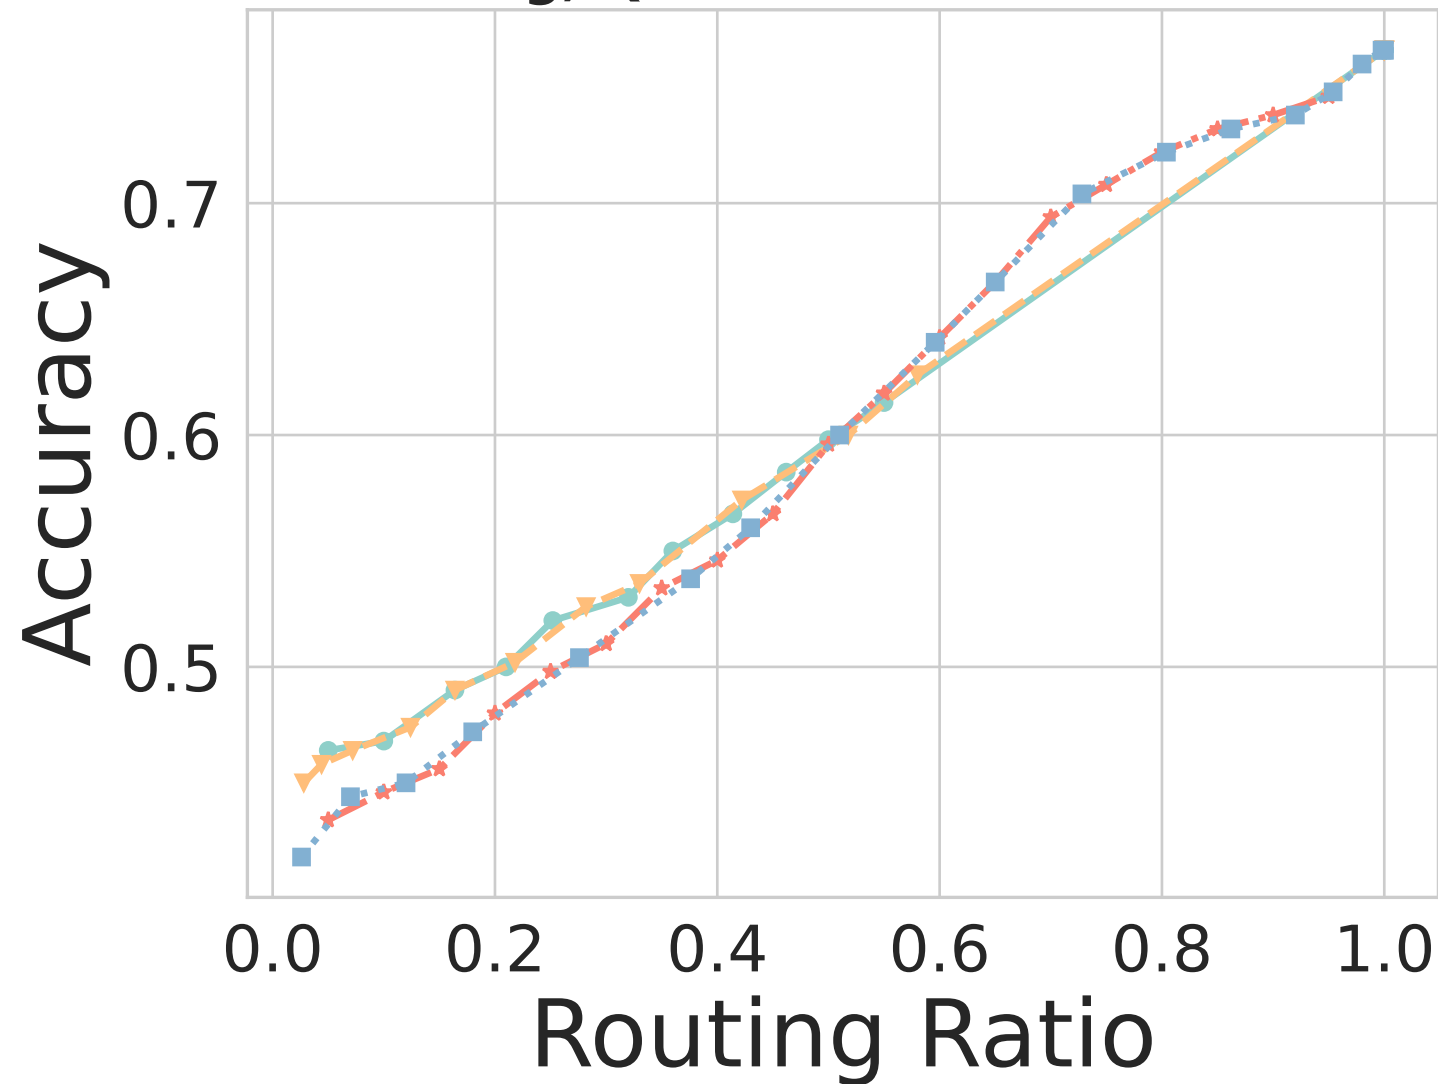

Supplement: supplementary_material [file cali_down_hellaswag_Qwen3-0.6B_gpt-4.1-mini.pdf › Routing_SLM_LLMs/Proxy_routing_prediction/to_gpt-4.1-mini/hellaswag_as_downstream/cali_down_hellaswag_Qwen3-0.6B_gpt-4.1-mini.pdf]

**HellaSwag, Qwen3-1.7B to GPT-4.1 mini**

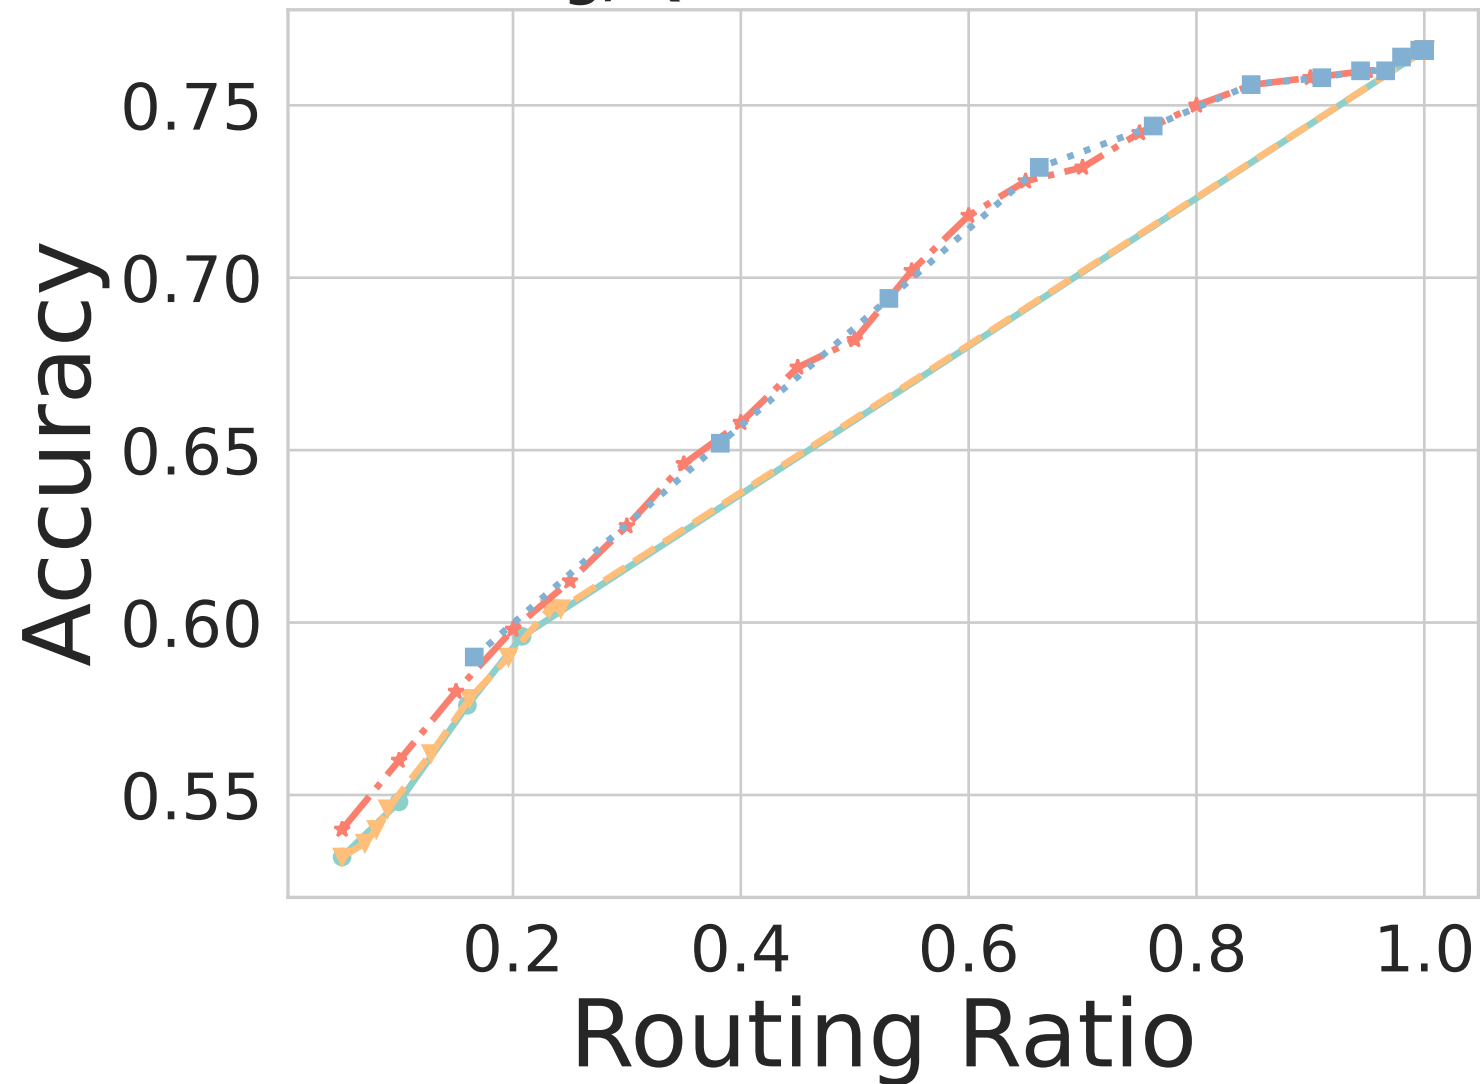

Supplement: supplementary_material [file cali_down_hellaswag_Qwen3-1.7B_gpt-4.1-mini.pdf › Routing_SLM_LLMs/Proxy_routing_prediction/to_gpt-4.1-mini/hellaswag_as_downstream/cali_down_hellaswag_Qwen3-1.7B_gpt-4.1-mini.pdf]

**HellaSwag, Qwen3-4B to GPT-4.1 mini**

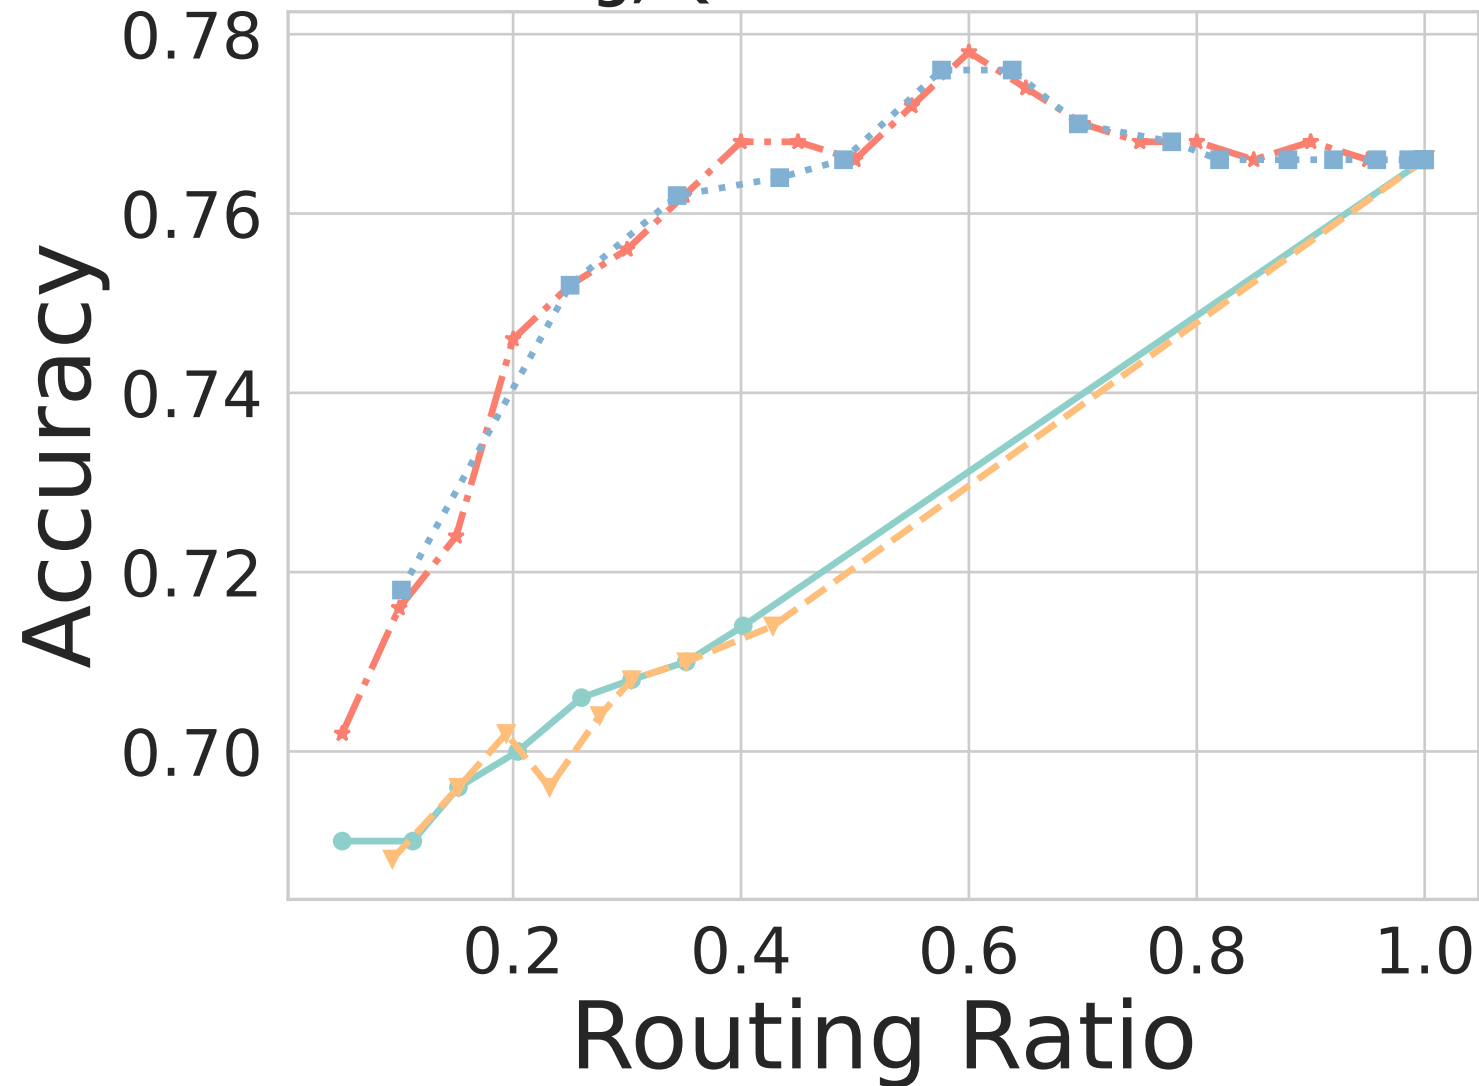

Supplement: supplementary_material [file cali_down_hellaswag_Qwen3-4B_gpt-4.1-mini.pdf › Routing_SLM_LLMs/Proxy_routing_prediction/to_gpt-4.1-mini/hellaswag_as_downstream/cali_down_hellaswag_Qwen3-4B_gpt-4.1-mini.pdf]

**HellaSwag, granite-3.1-8b to GPT-4.1 mini**

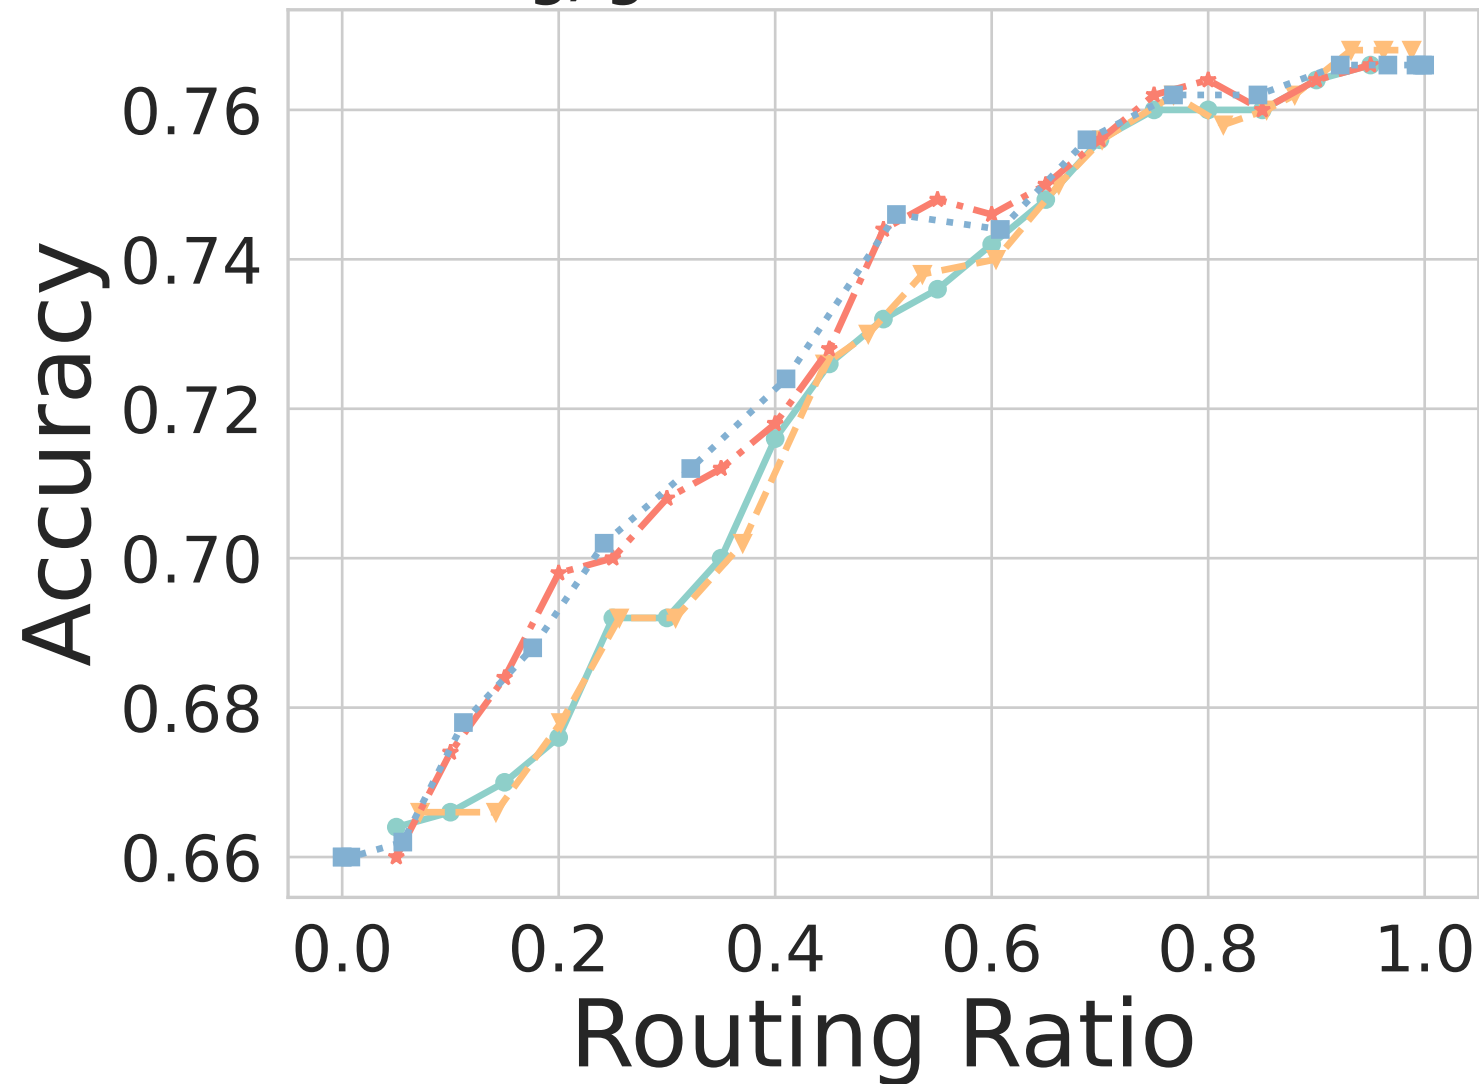

Supplement: supplementary_material [file cali_down_hellaswag_granite-3.1-8b_gpt-4.1-mini.pdf › Routing_SLM_LLMs/Proxy_routing_prediction/to_gpt-4.1-mini/hellaswag_as_downstream/cali_down_hellaswag_granite-3.1-8b_gpt-4.1-mini.pdf]

**HellaSwag, llama-3.1-8b to GPT-4.1 mini**

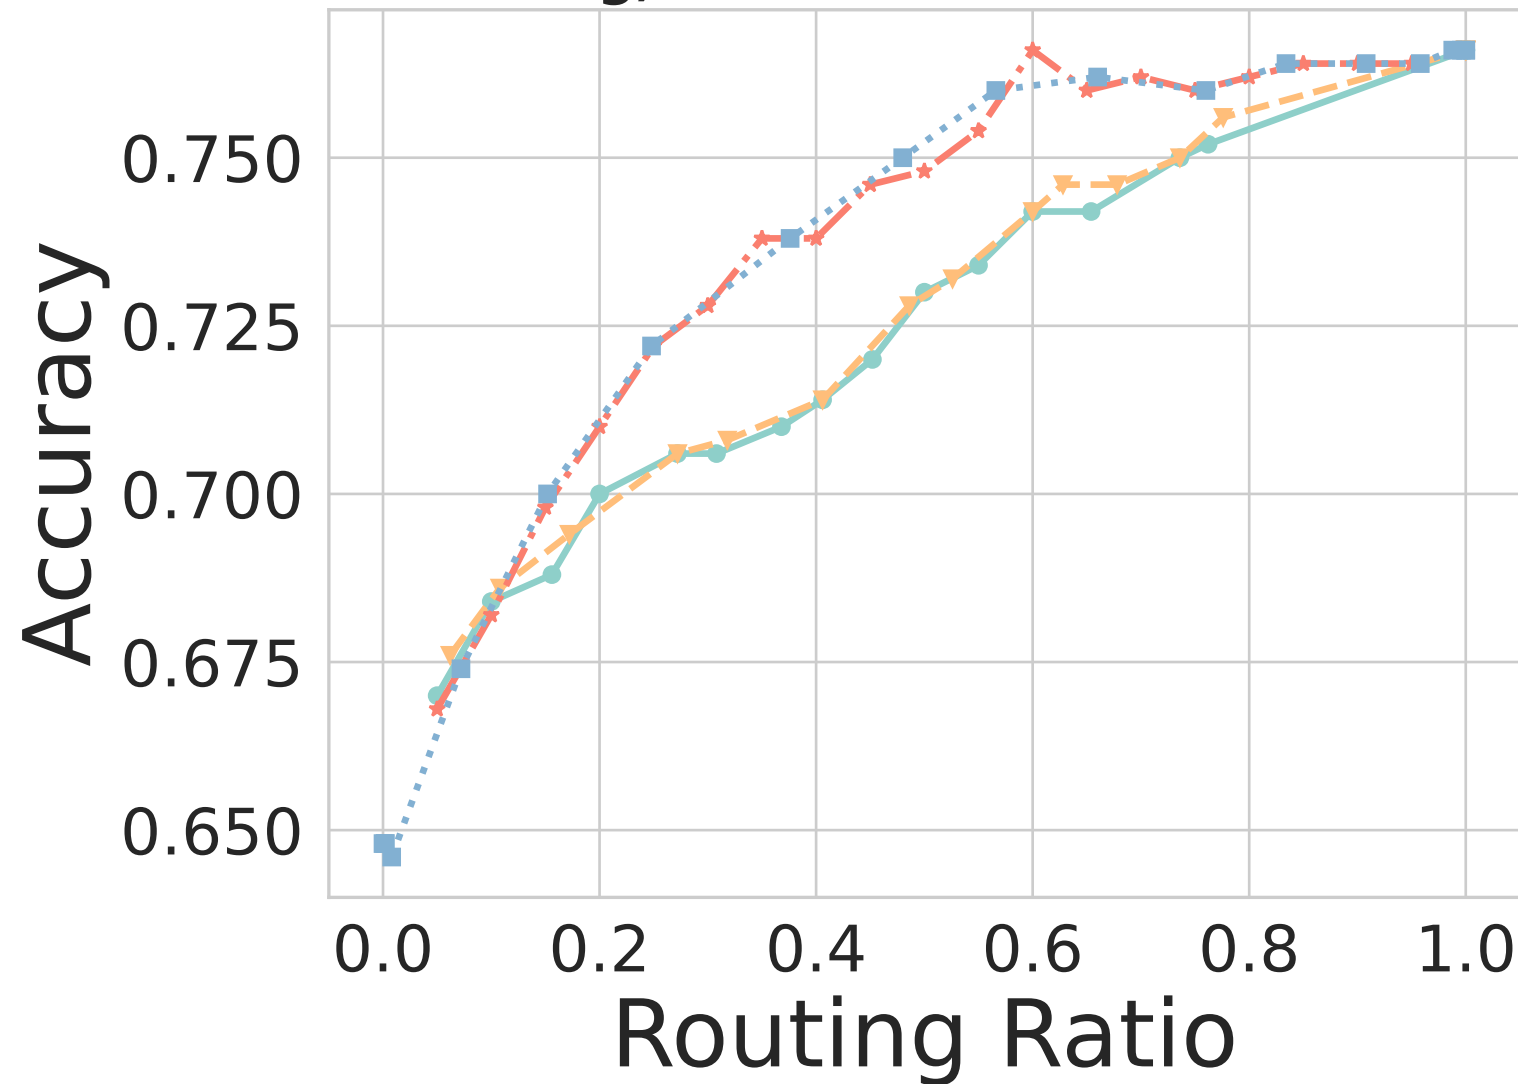

Supplement: supplementary_material [file cali_down_hellaswag_llama-3.1-8b_gpt-4.1-mini.pdf › Routing_SLM_LLMs/Proxy_routing_prediction/to_gpt-4.1-mini/hellaswag_as_downstream/cali_down_hellaswag_llama-3.1-8b_gpt-4.1-mini.pdf]

**HellaSwag, llama-3.2-1b to GPT-4.1 mini**

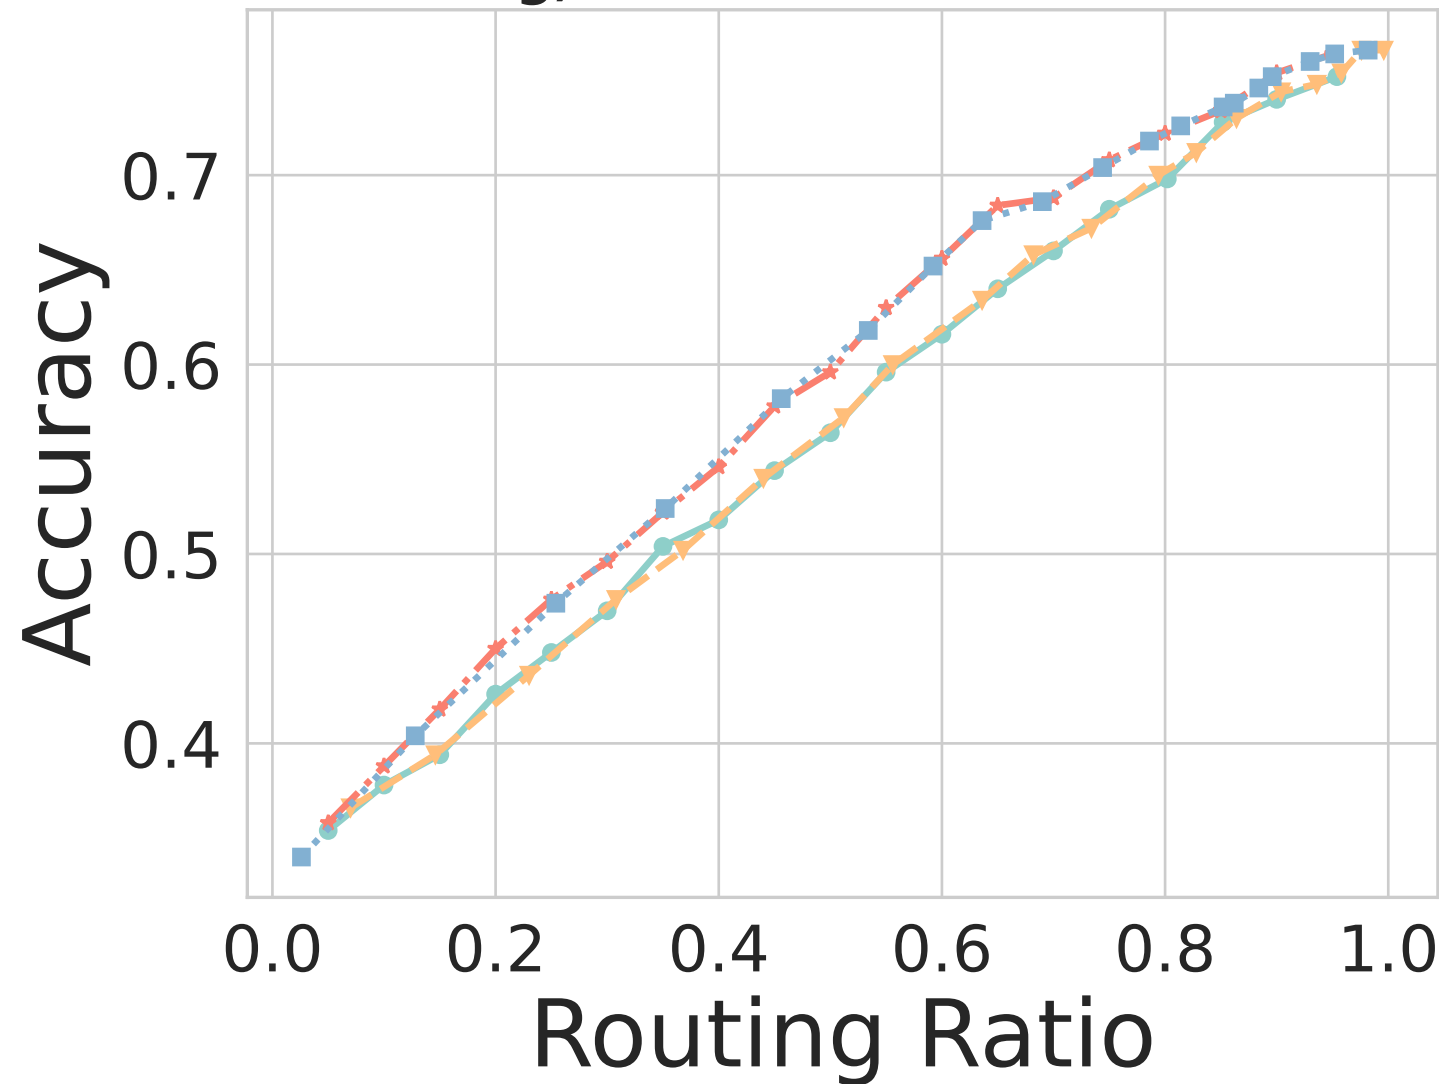

Supplement: supplementary_material [file cali_down_hellaswag_llama-3.2-1b_gpt-4.1-mini.pdf › Routing_SLM_LLMs/Proxy_routing_prediction/to_gpt-4.1-mini/hellaswag_as_downstream/cali_down_hellaswag_llama-3.2-1b_gpt-4.1-mini.pdf]

**HellaSwag, llama-3.2-3b to GPT-4.1 mini**

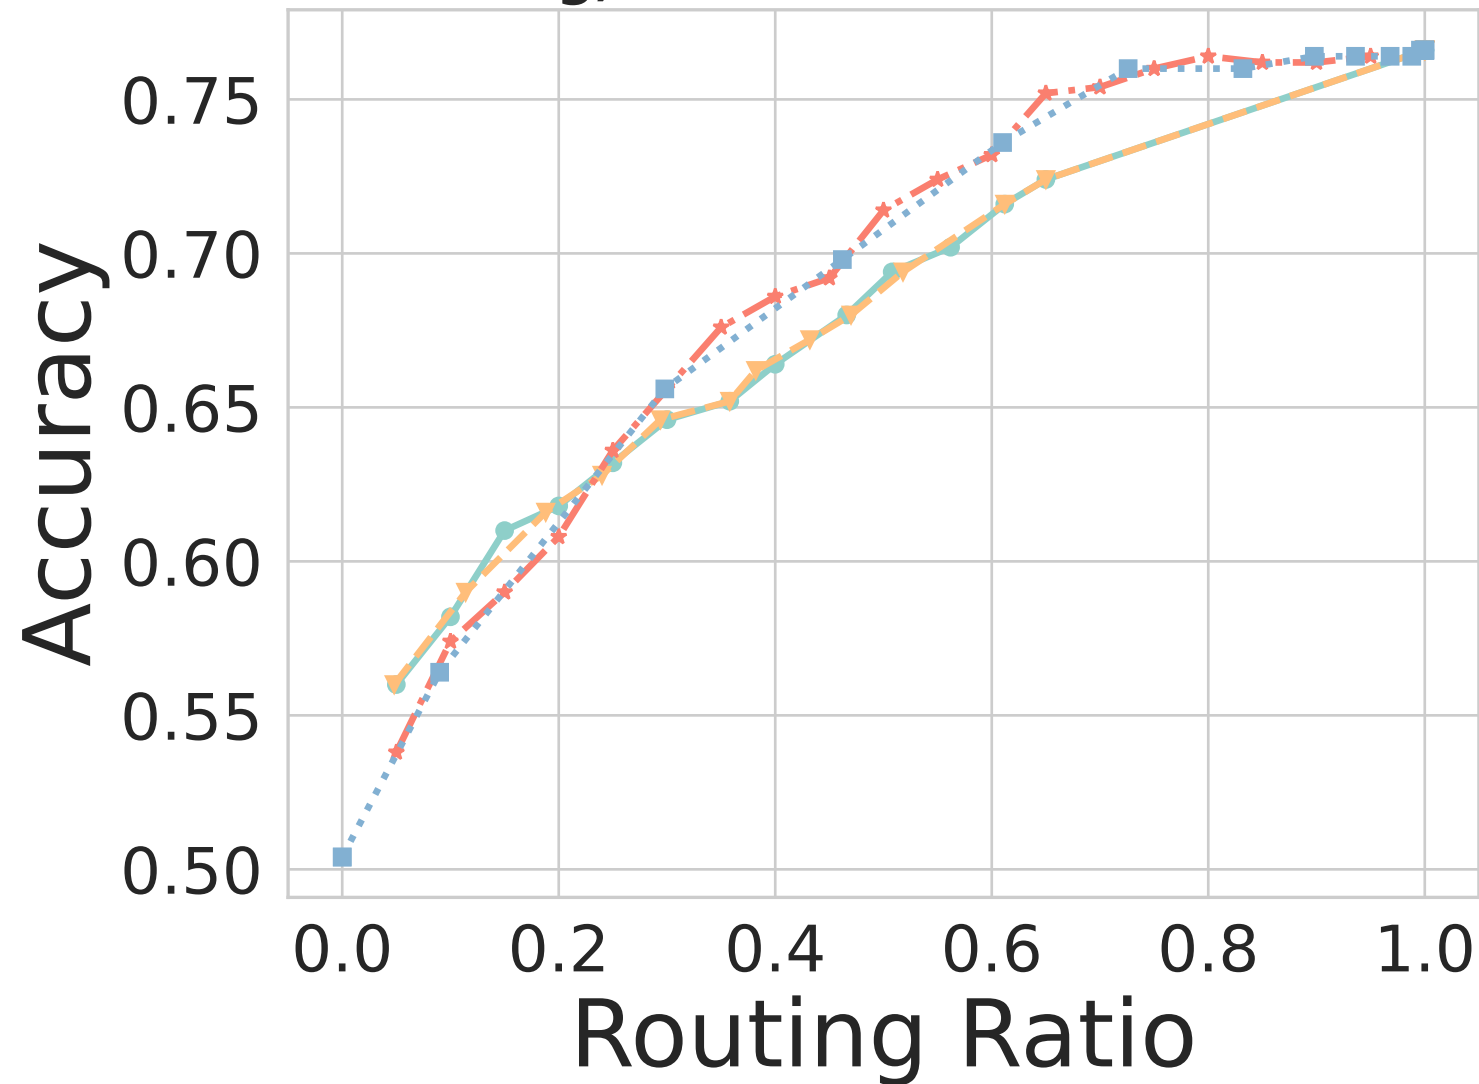

Supplement: supplementary_material [file cali_down_hellaswag_llama-3.2-3b_gpt-4.1-mini.pdf › Routing_SLM_LLMs/Proxy_routing_prediction/to_gpt-4.1-mini/hellaswag_as_downstream/cali_down_hellaswag_llama-3.2-3b_gpt-4.1-mini.pdf]

**HellaSwag, mistral-7b to GPT-4.1 mini**

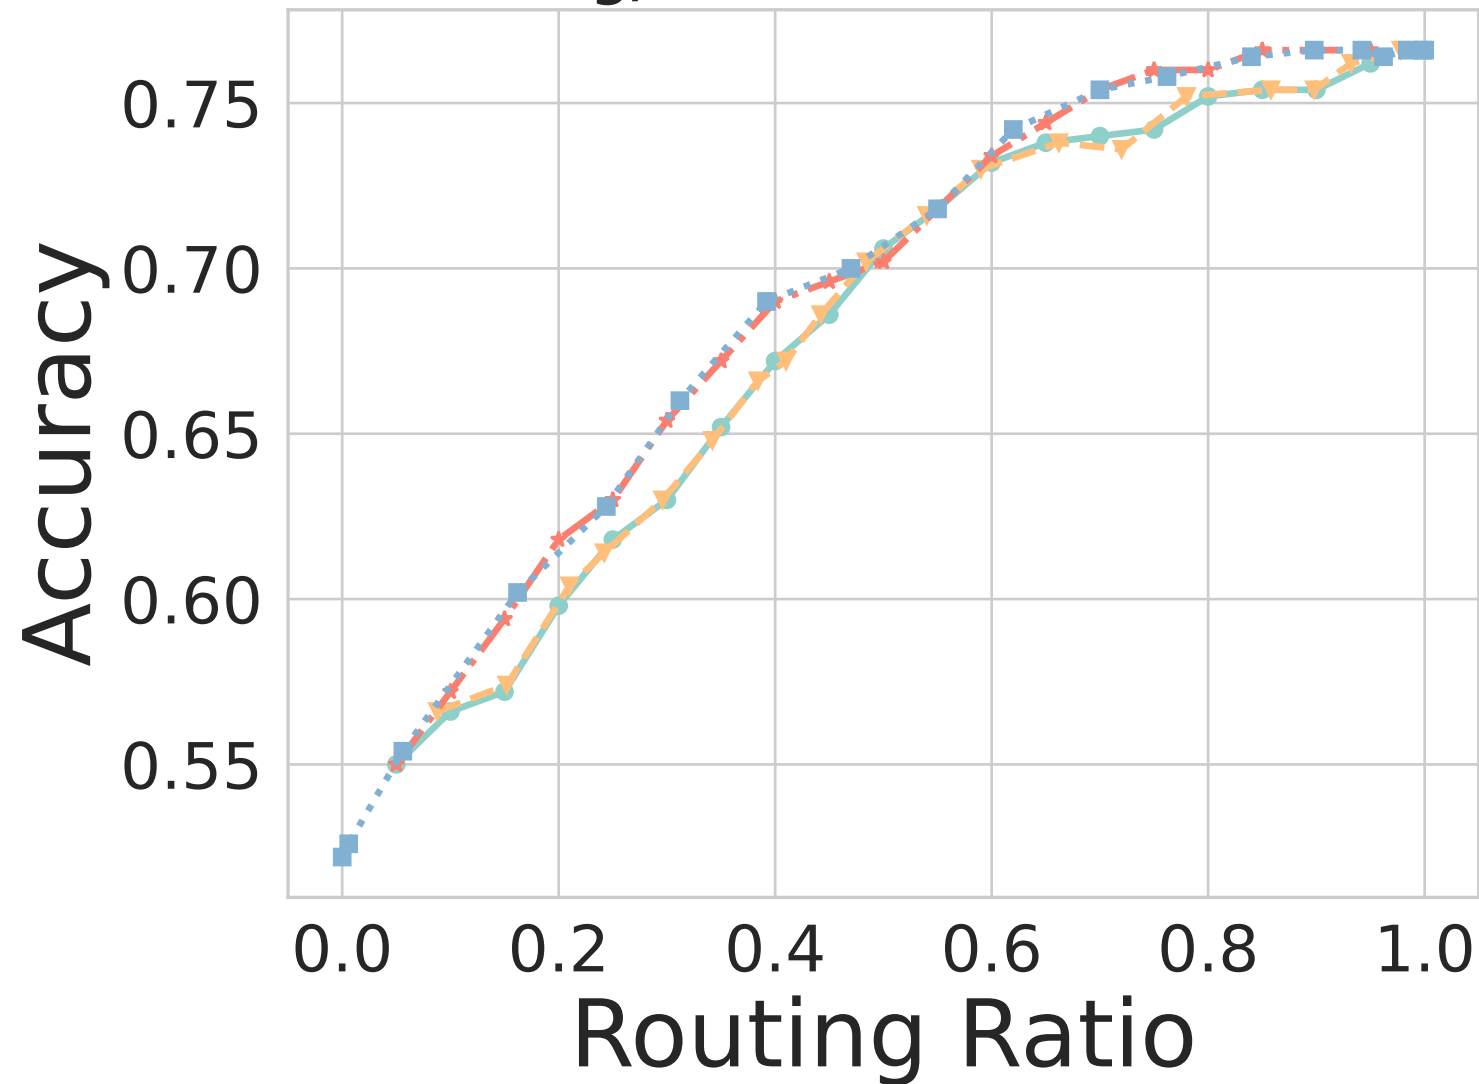

Supplement: supplementary_material [file cali_down_hellaswag_mistral-7b_gpt-4.1-mini.pdf › Routing_SLM_LLMs/Proxy_routing_prediction/to_gpt-4.1-mini/hellaswag_as_downstream/cali_down_hellaswag_mistral-7b_gpt-4.1-mini.pdf]

**HellaSwag, phi-3.5-mini to GPT-4.1 mini**

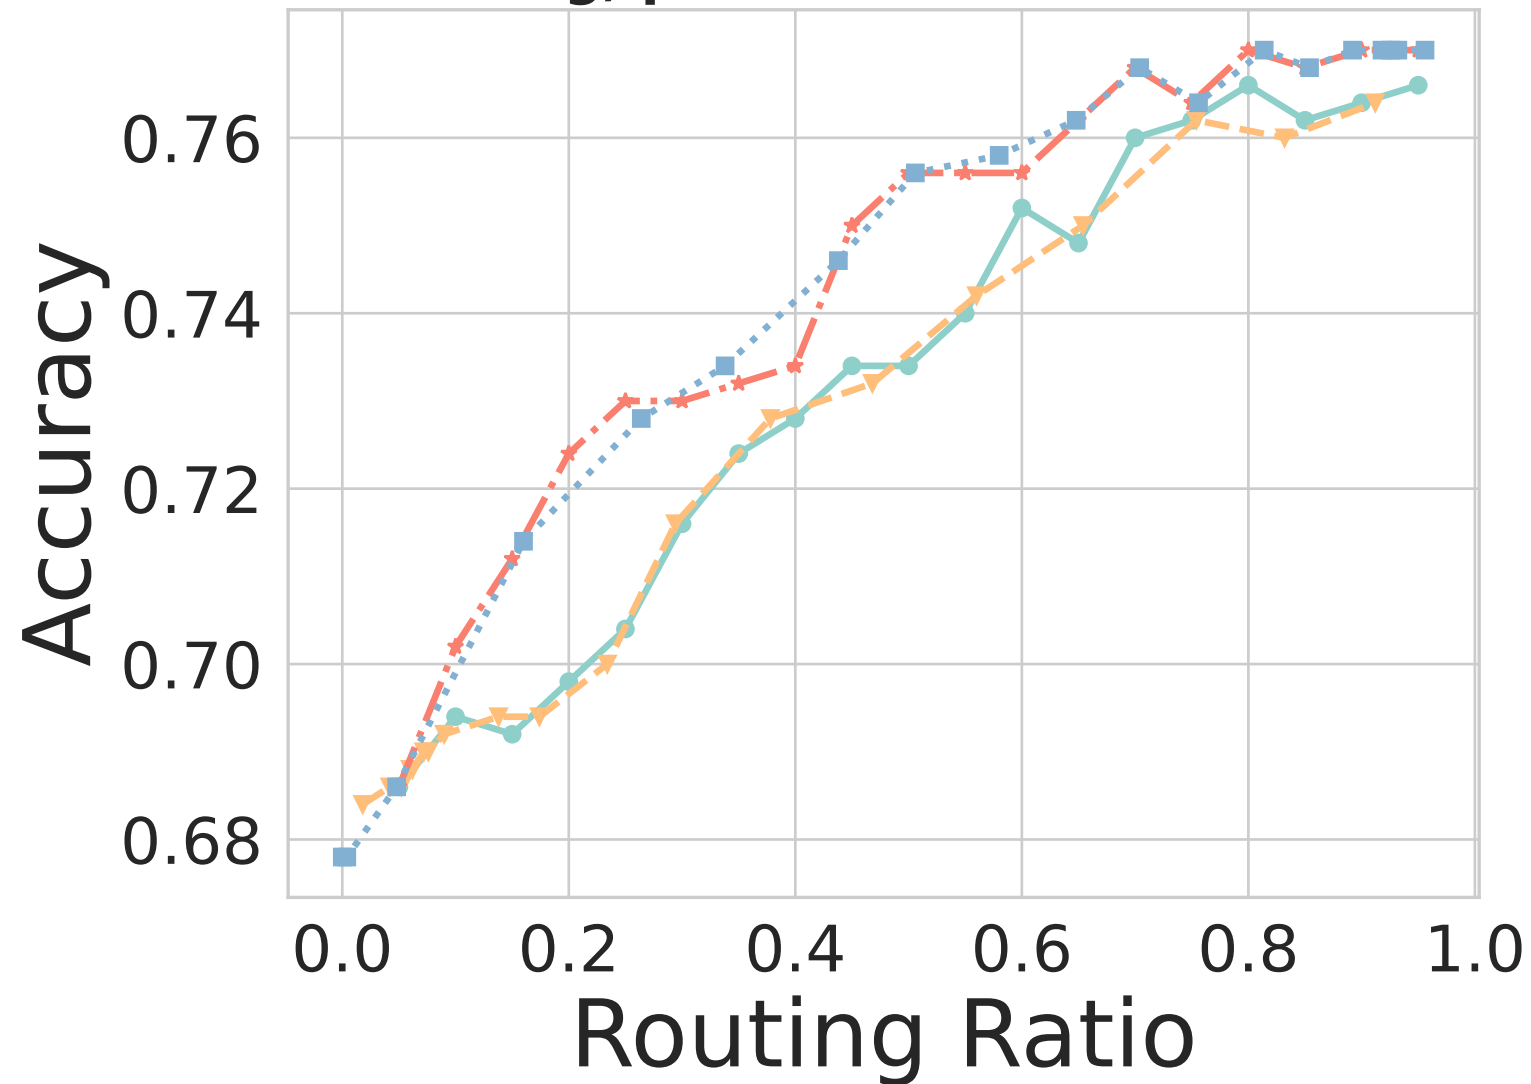

Supplement: supplementary_material [file cali_down_hellaswag_phi-3.5-mini_gpt-4.1-mini.pdf › Routing_SLM_LLMs/Proxy_routing_prediction/to_gpt-4.1-mini/hellaswag_as_downstream/cali_down_hellaswag_phi-3.5-mini_gpt-4.1-mini.pdf]

**HellaSwag, phi-4-mini-reasoning to GPT-4.1 mini**

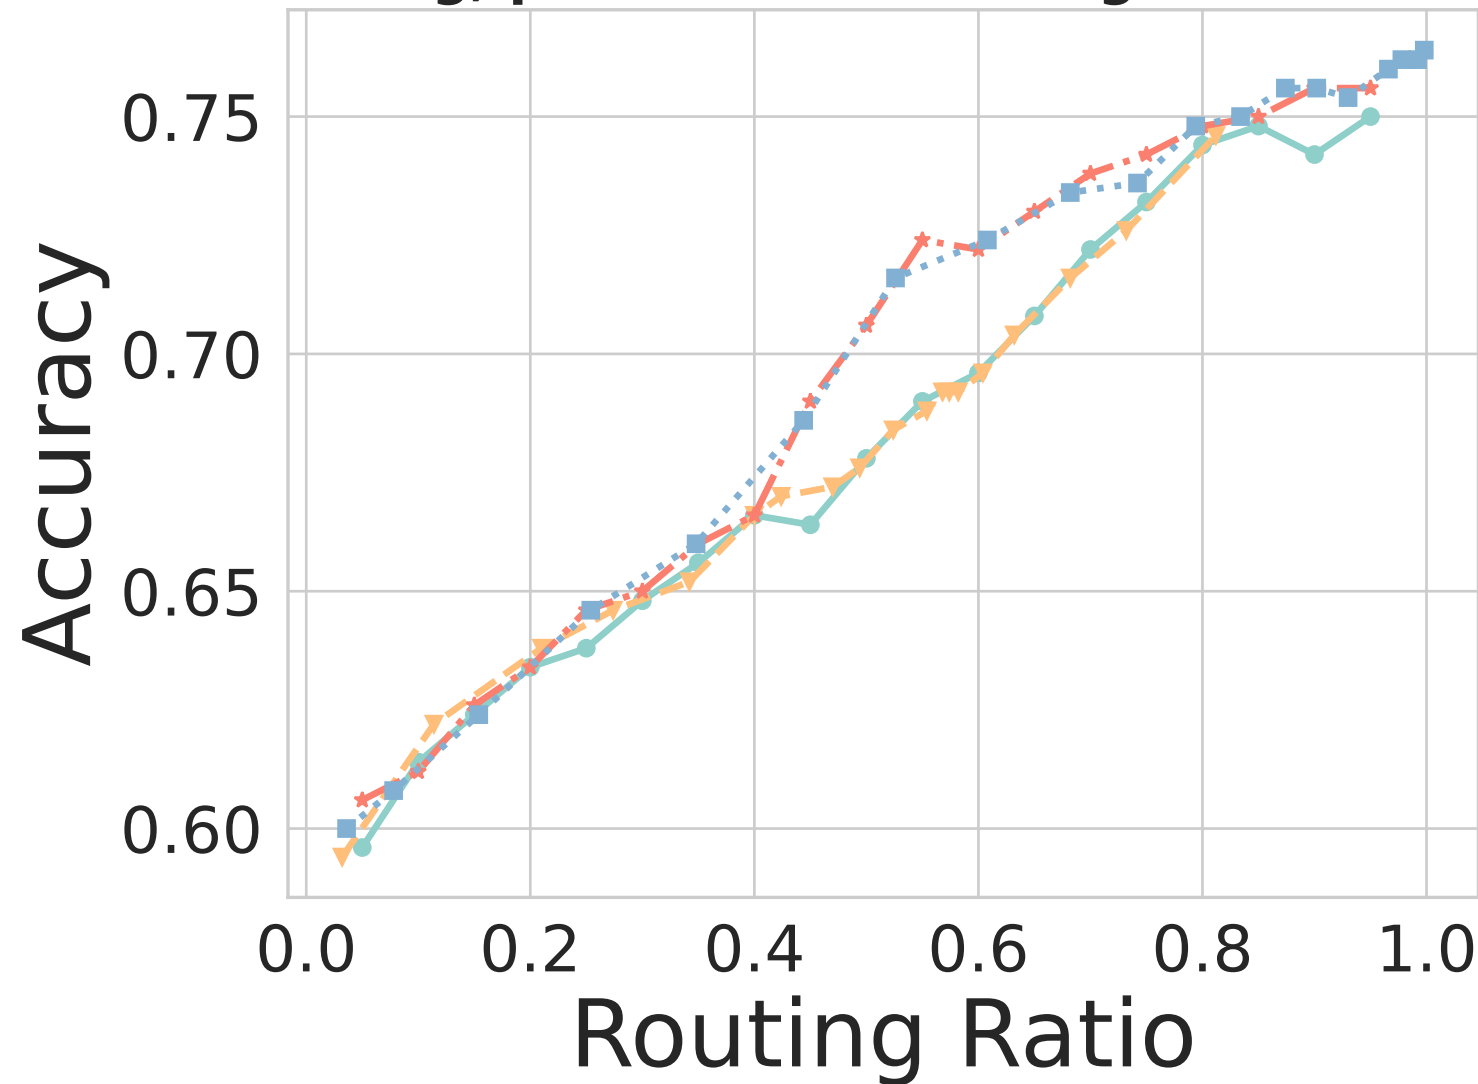

Supplement: supplementary_material [file cali_down_hellaswag_phi-4-mini-reasoning_gpt-4.1-mini.pdf › Routing_SLM_LLMs/Proxy_routing_prediction/to_gpt-4.1-mini/hellaswag_as_downstream/cali_down_hellaswag_phi-4-mini-reasoning_gpt-4.1-mini.pdf]

**HellaSwag, qwen-2.5-7b to GPT-4.1 mini**

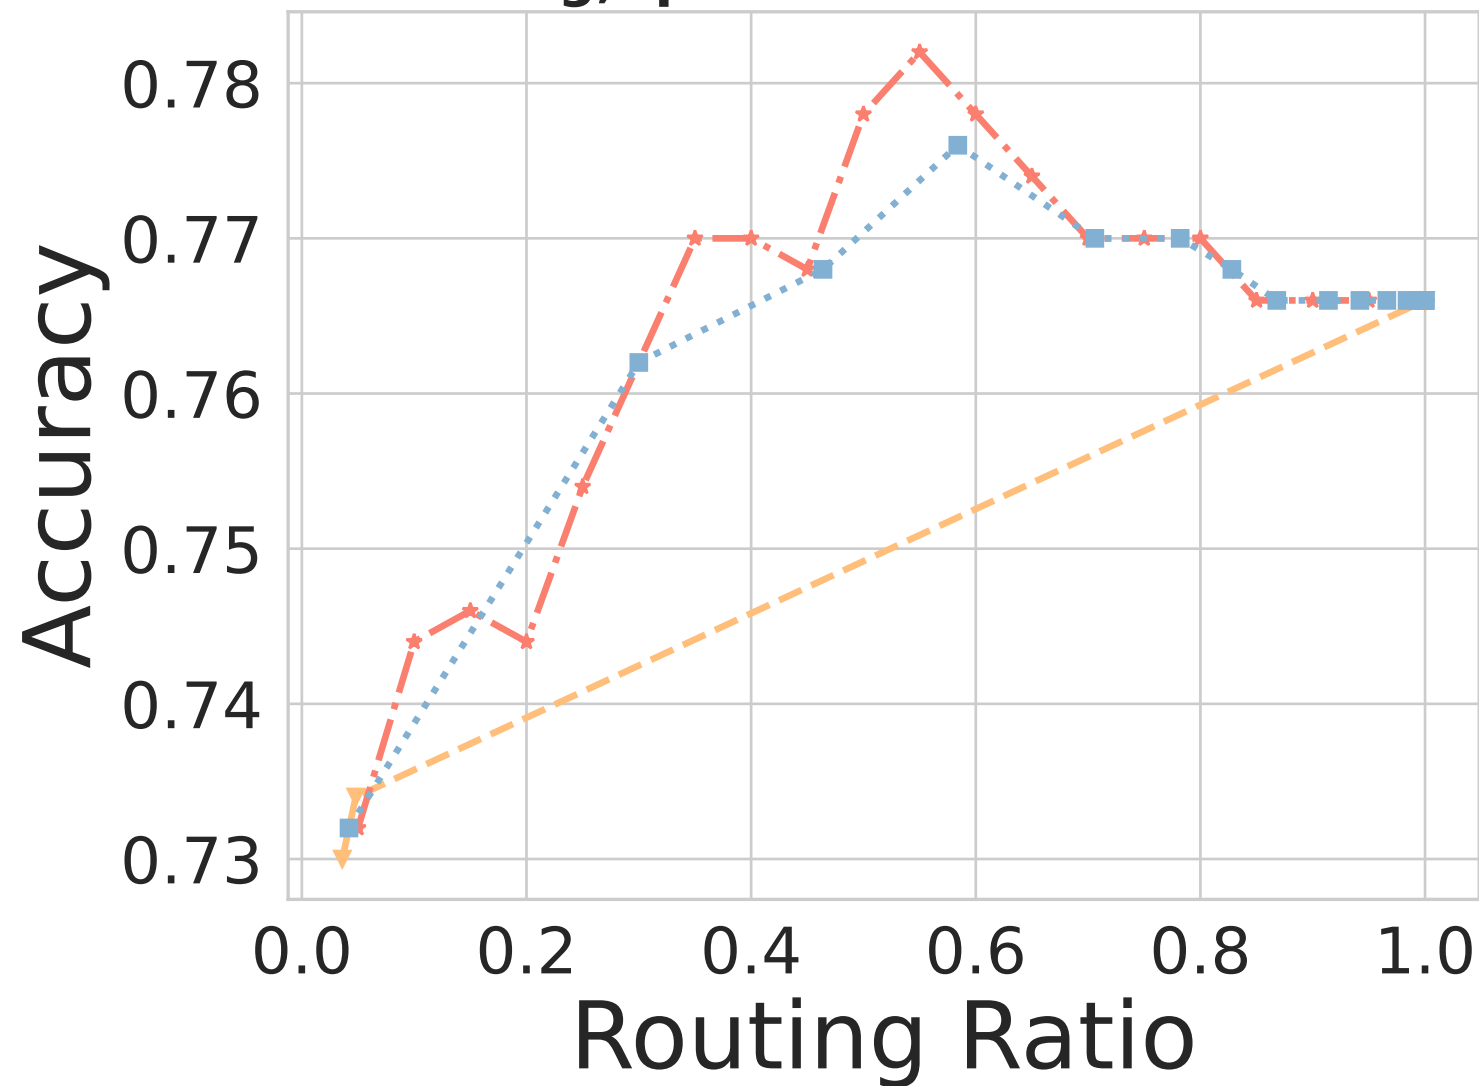

Supplement: supplementary_material [file cali_down_hellaswag_qwen-2.5-7b_gpt-4.1-mini.pdf › Routing_SLM_LLMs/Proxy_routing_prediction/to_gpt-4.1-mini/hellaswag_as_downstream/cali_down_hellaswag_qwen-2.5-7b_gpt-4.1-mini.pdf]

**HellaSwag, rwkv to GPT-4.1 mini**

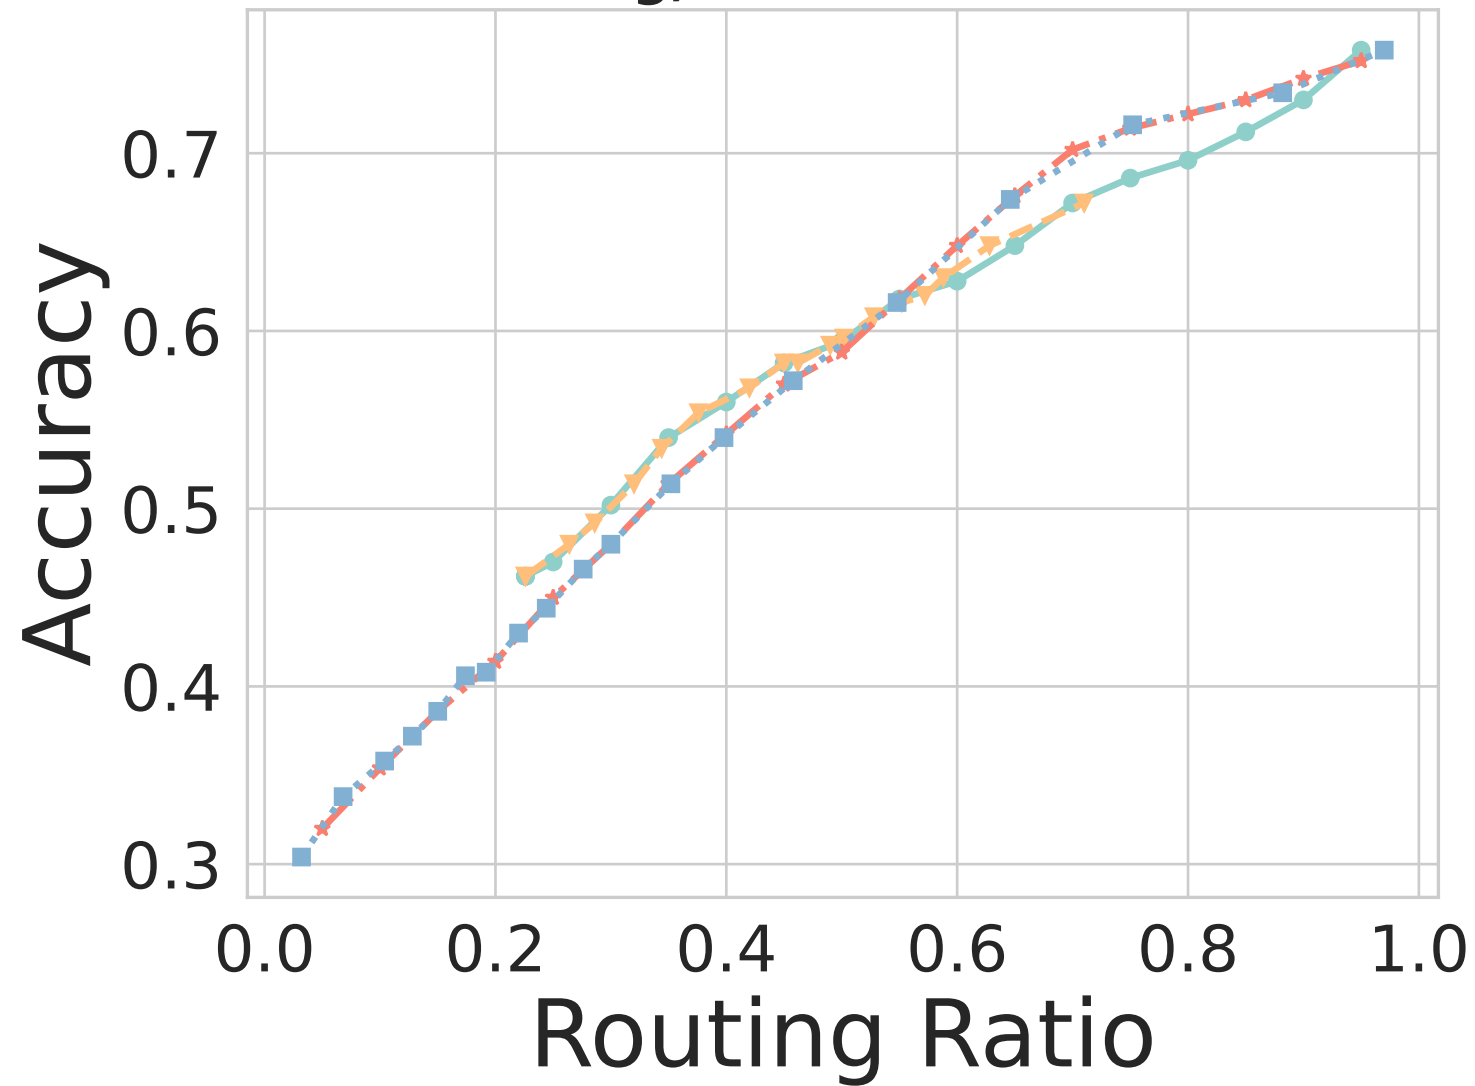

Supplement: supplementary_material [file cali_down_hellaswag_rwkv_gpt-4.1-mini.pdf › Routing_SLM_LLMs/Proxy_routing_prediction/to_gpt-4.1-mini/hellaswag_as_downstream/cali_down_hellaswag_rwkv_gpt-4.1-mini.pdf]

**MATH-500, Qwen3-0.6B to GPT-4.1 mini**

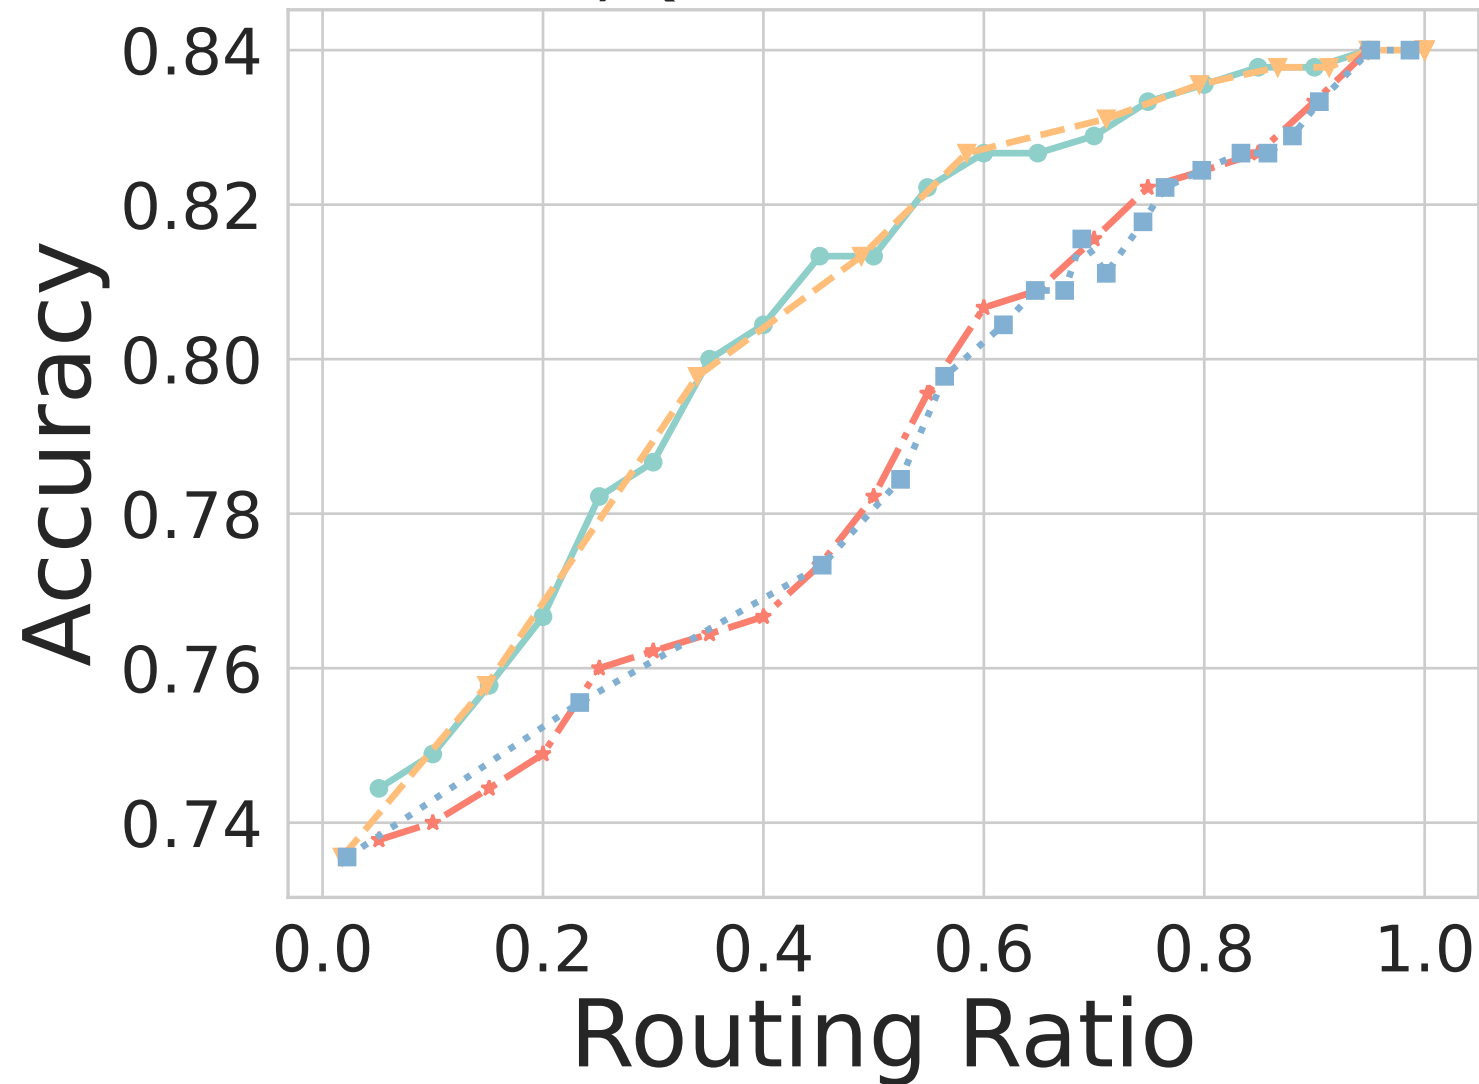

Supplement: supplementary_material [file cali_down_math_500_Qwen3-0.6B_gpt-4.1-mini.pdf › Routing_SLM_LLMs/Proxy_routing_prediction/to_gpt-4.1-mini/math_500_as_downstream/cali_down_math_500_Qwen3-0.6B_gpt-4.1-mini.pdf]

**MATH-500, Qwen3-1.7B to GPT-4.1 mini**

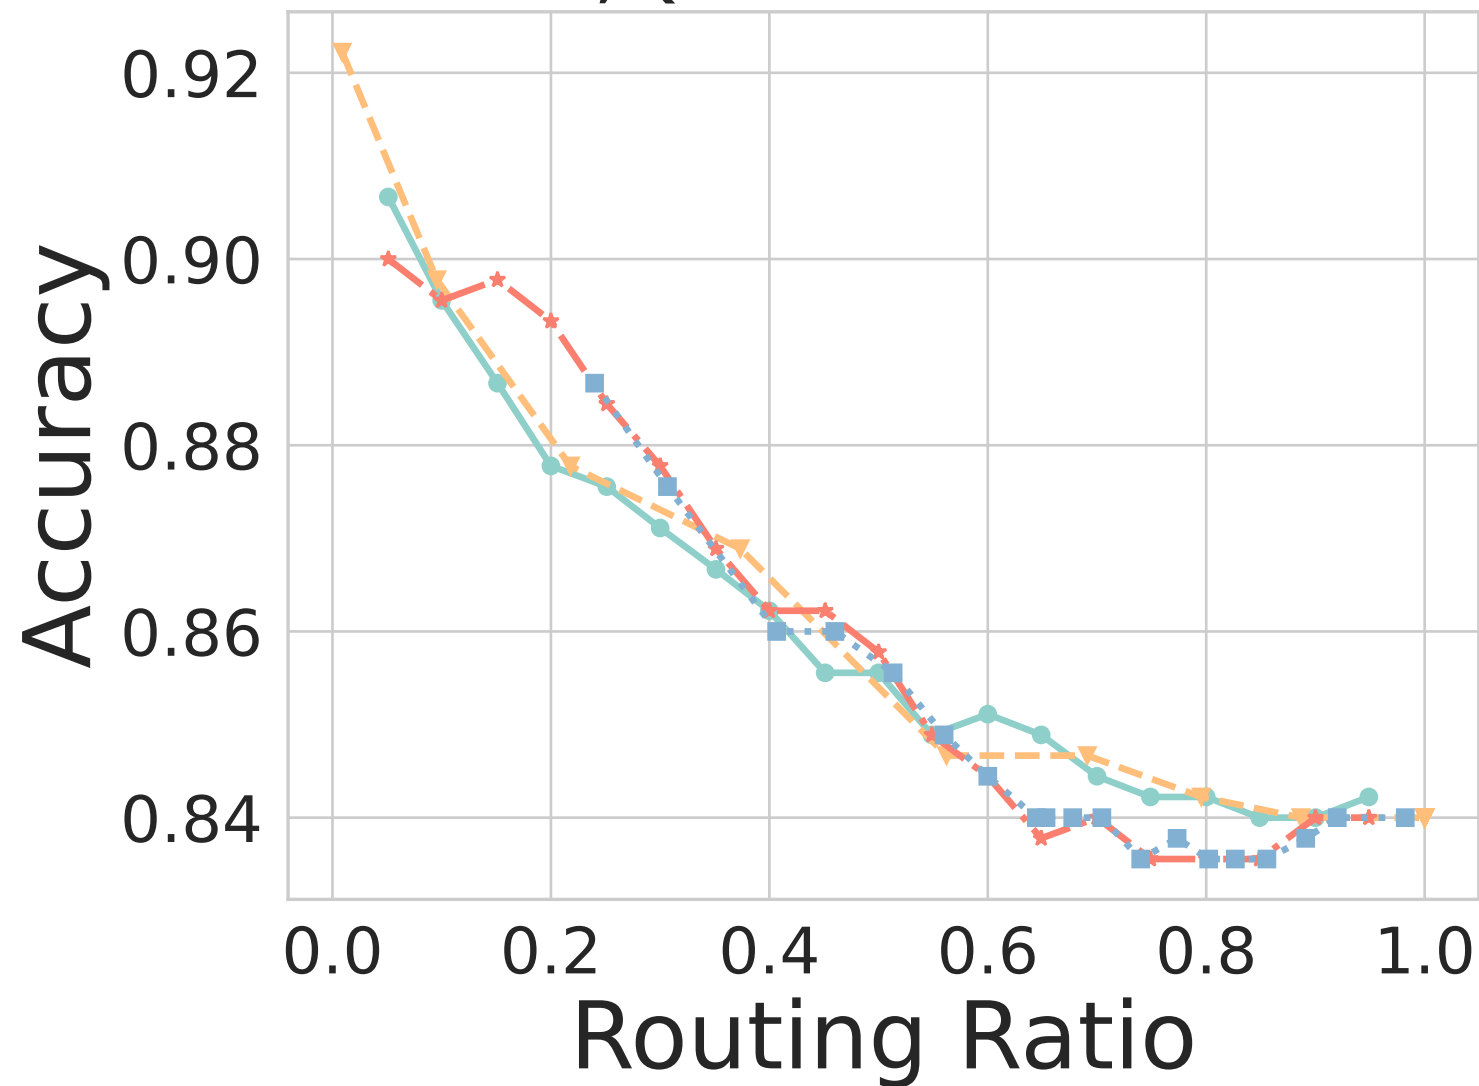

Supplement: supplementary_material [file cali_down_math_500_Qwen3-1.7B_gpt-4.1-mini.pdf › Routing_SLM_LLMs/Proxy_routing_prediction/to_gpt-4.1-mini/math_500_as_downstream/cali_down_math_500_Qwen3-1.7B_gpt-4.1-mini.pdf]

**MATH-500, Qwen3-4B to GPT-4.1 mini**

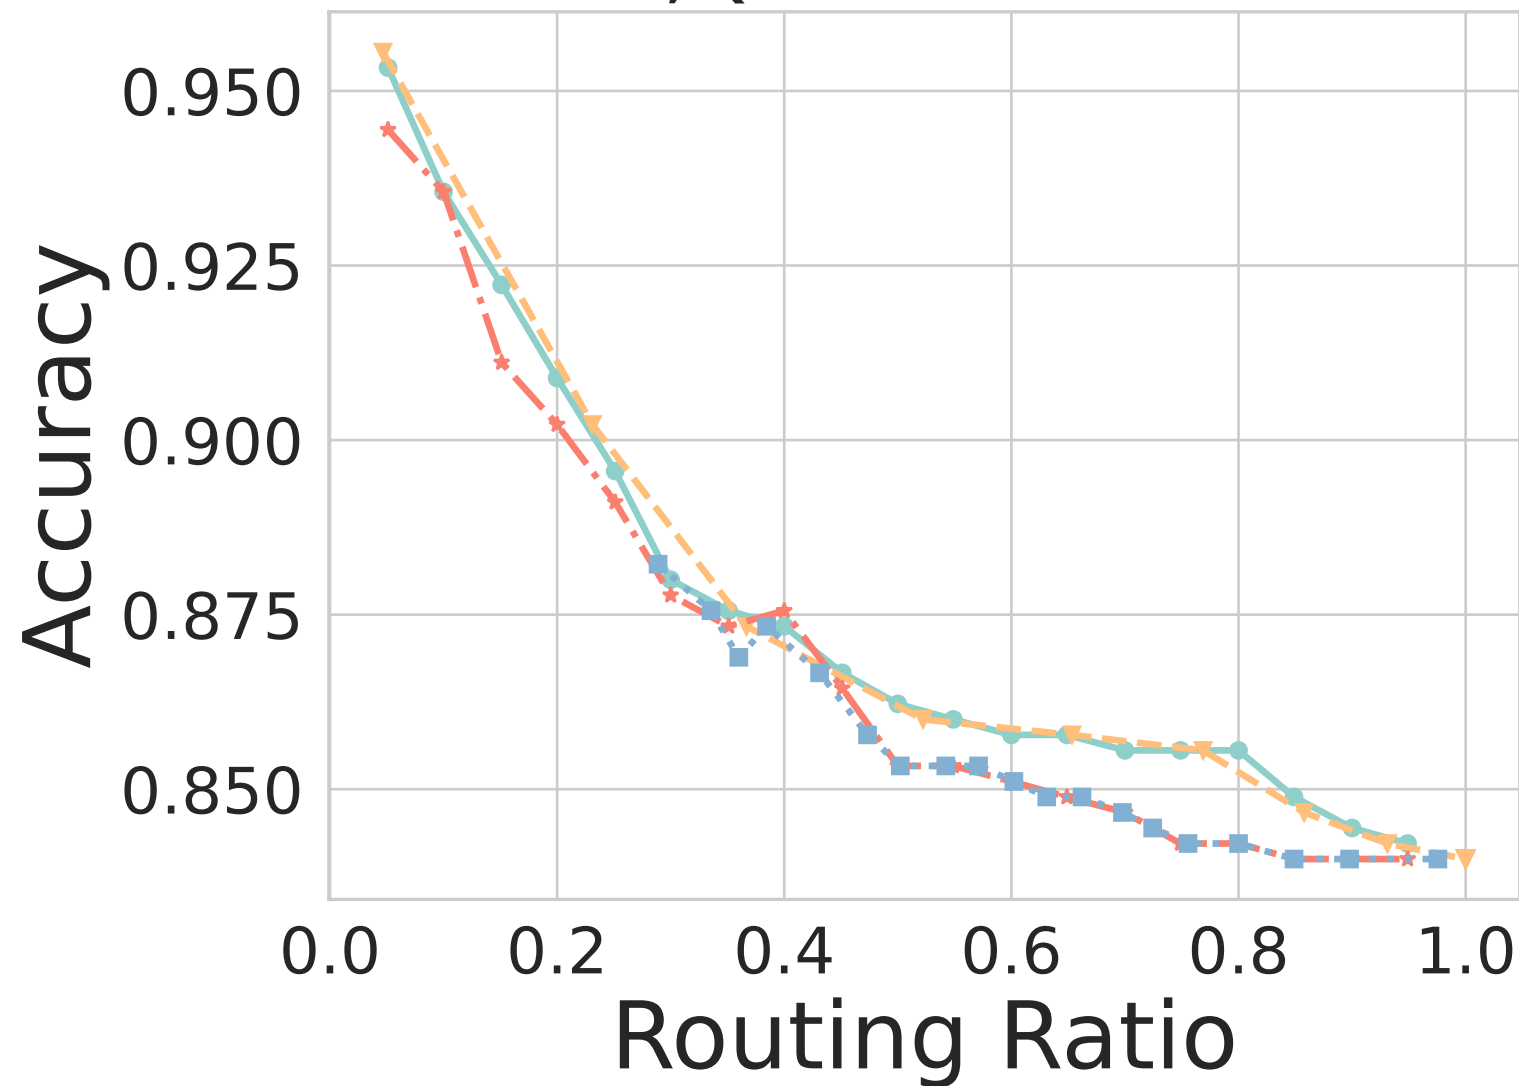

Supplement: supplementary_material [file cali_down_math_500_Qwen3-4B_gpt-4.1-mini.pdf › Routing_SLM_LLMs/Proxy_routing_prediction/to_gpt-4.1-mini/math_500_as_downstream/cali_down_math_500_Qwen3-4B_gpt-4.1-mini.pdf]

**MATH-500, granite-3.1-8b to GPT-4.1 mini**

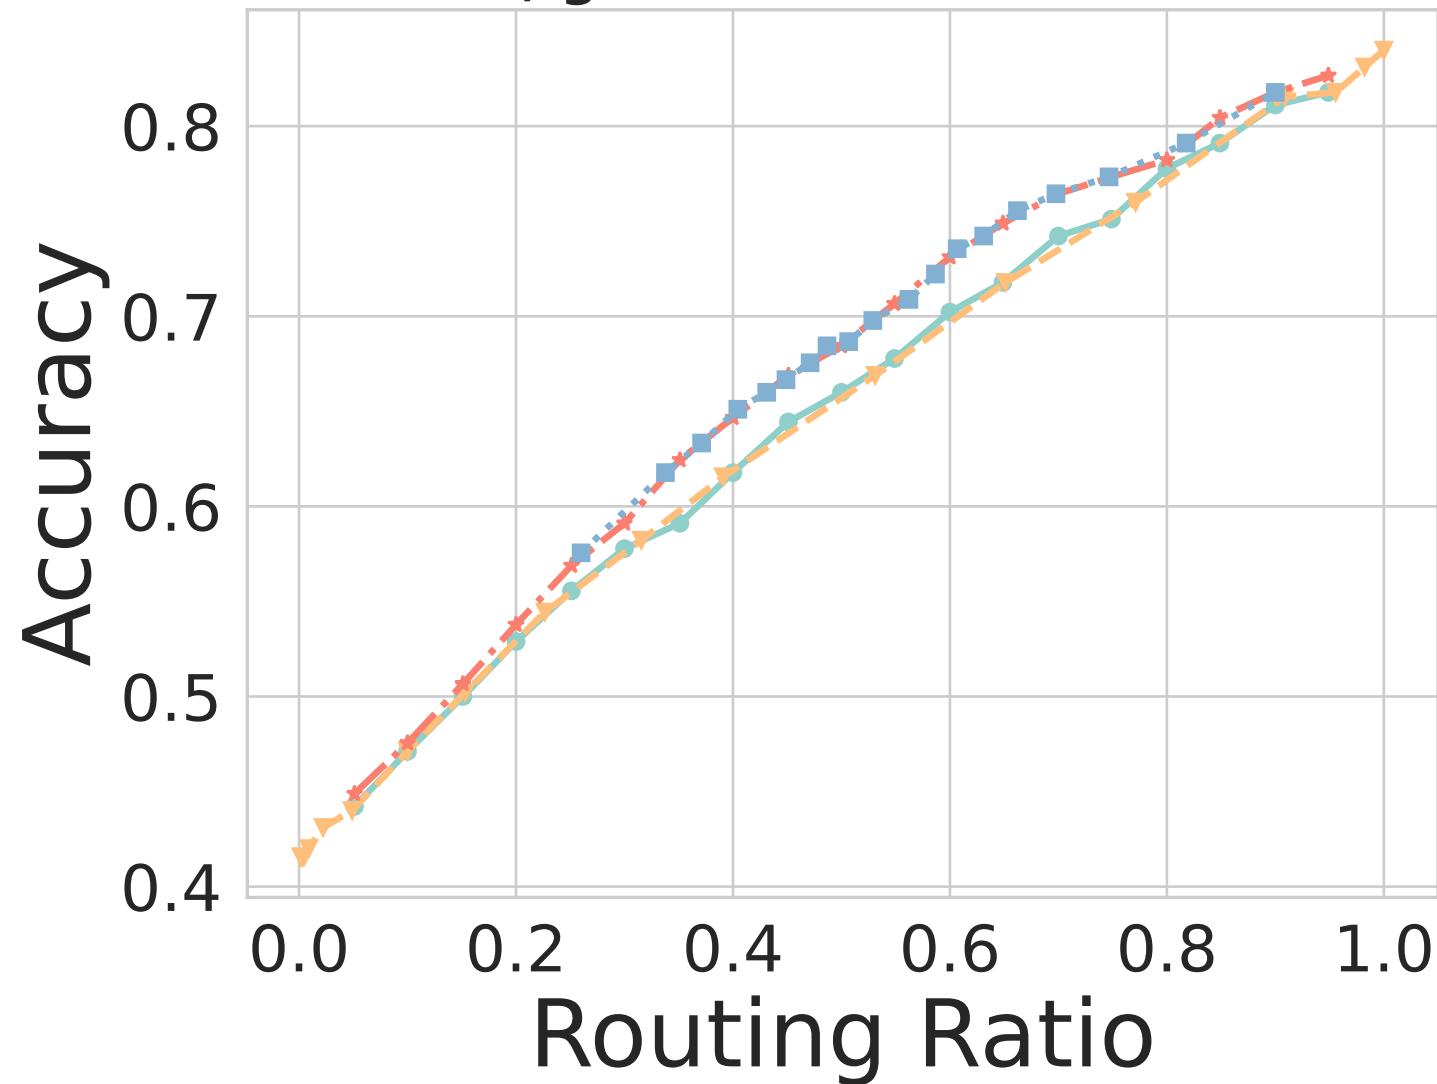

Supplement: supplementary_material [file cali_down_math_500_granite-3.1-8b_gpt-4.1-mini.pdf › Routing_SLM_LLMs/Proxy_routing_prediction/to_gpt-4.1-mini/math_500_as_downstream/cali_down_math_500_granite-3.1-8b_gpt-4.1-mini.pdf]

**MATH-500, llama-3.1-8b to GPT-4.1 mini**

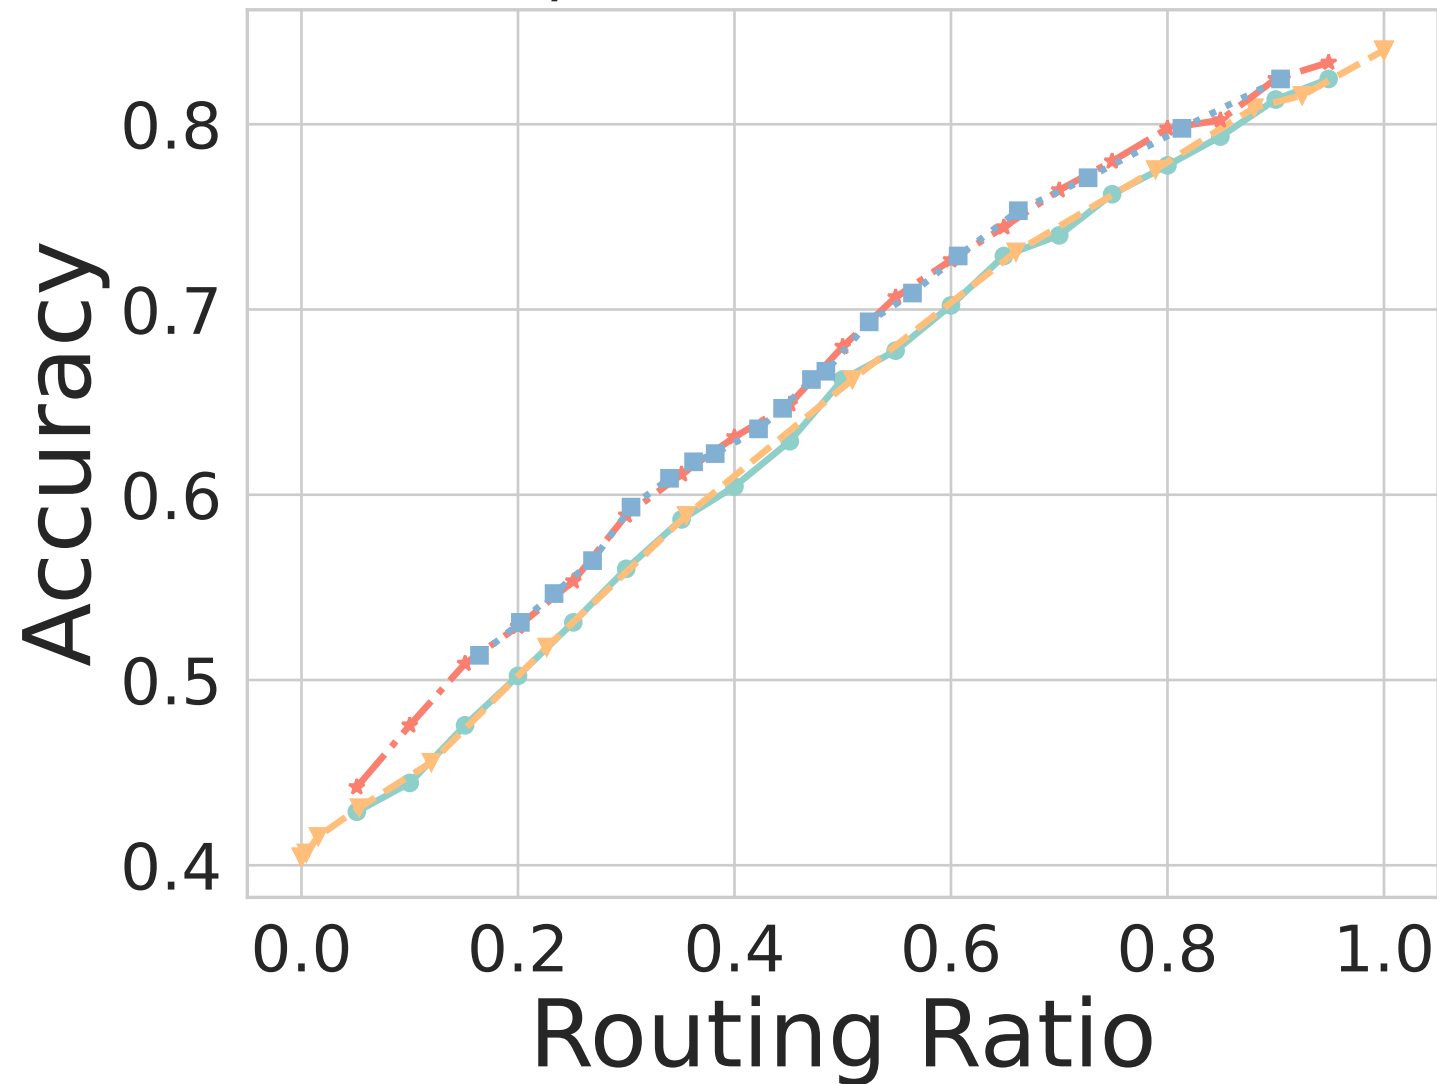

Supplement: supplementary_material [file cali_down_math_500_llama-3.1-8b_gpt-4.1-mini.pdf › Routing_SLM_LLMs/Proxy_routing_prediction/to_gpt-4.1-mini/math_500_as_downstream/cali_down_math_500_llama-3.1-8b_gpt-4.1-mini.pdf]

**MATH-500, llama-3.2-1b to GPT-4.1 mini**

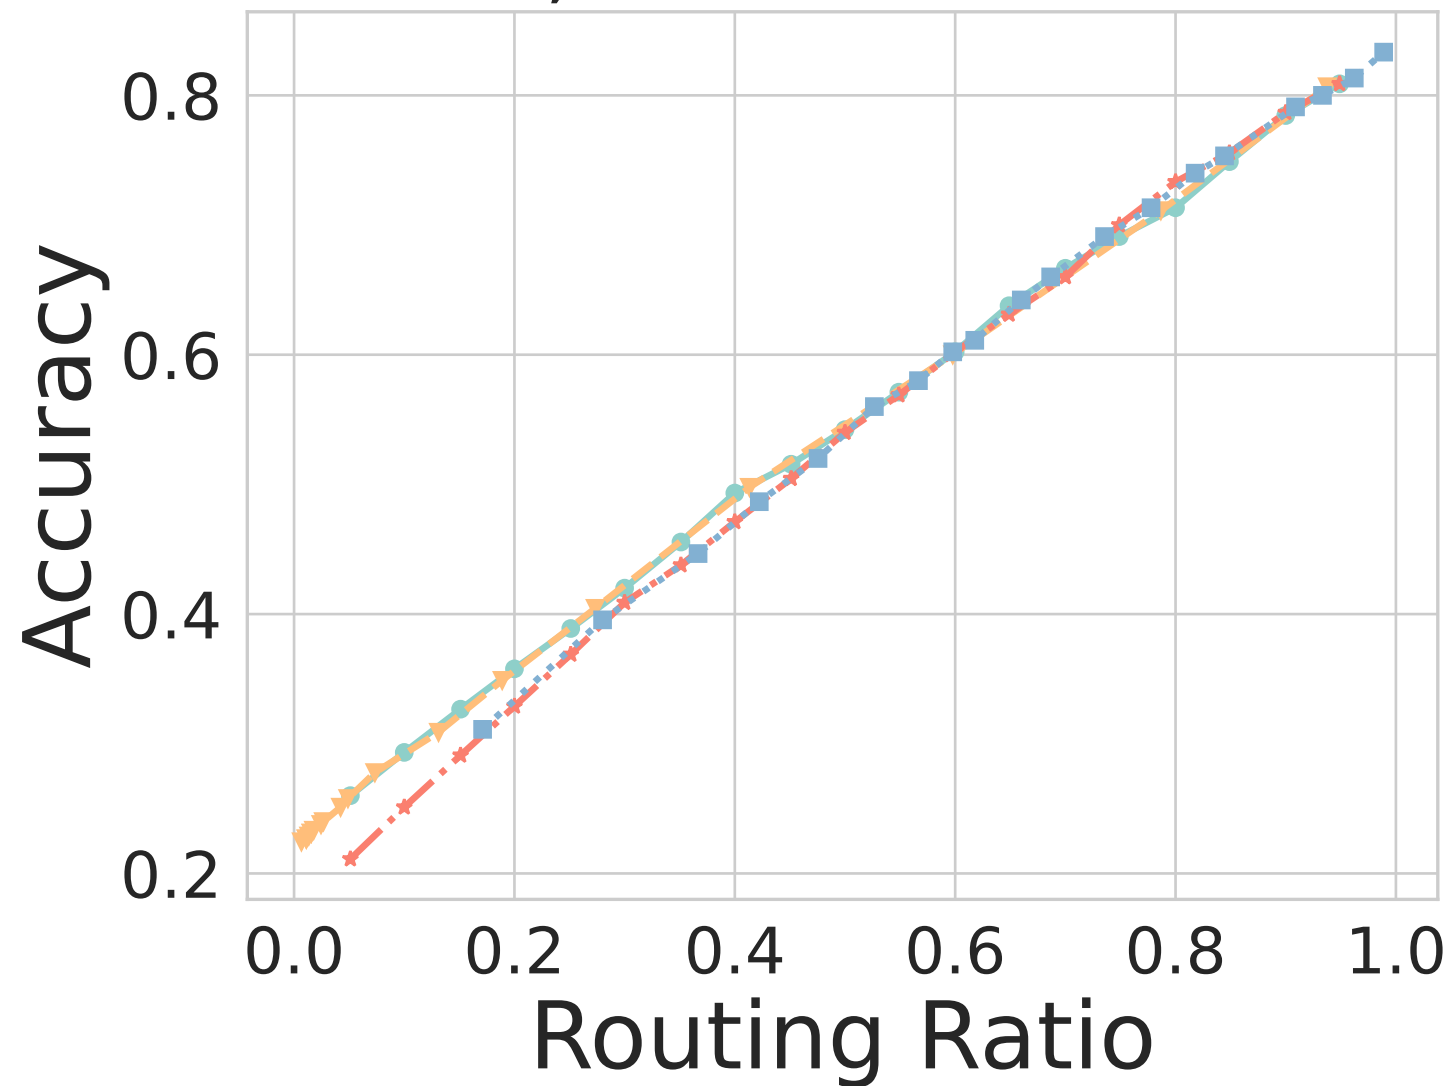

Supplement: supplementary_material [file cali_down_math_500_llama-3.2-1b_gpt-4.1-mini.pdf › Routing_SLM_LLMs/Proxy_routing_prediction/to_gpt-4.1-mini/math_500_as_downstream/cali_down_math_500_llama-3.2-1b_gpt-4.1-mini.pdf]

**MATH-500, llama-3.2-3b to GPT-4.1 mini**

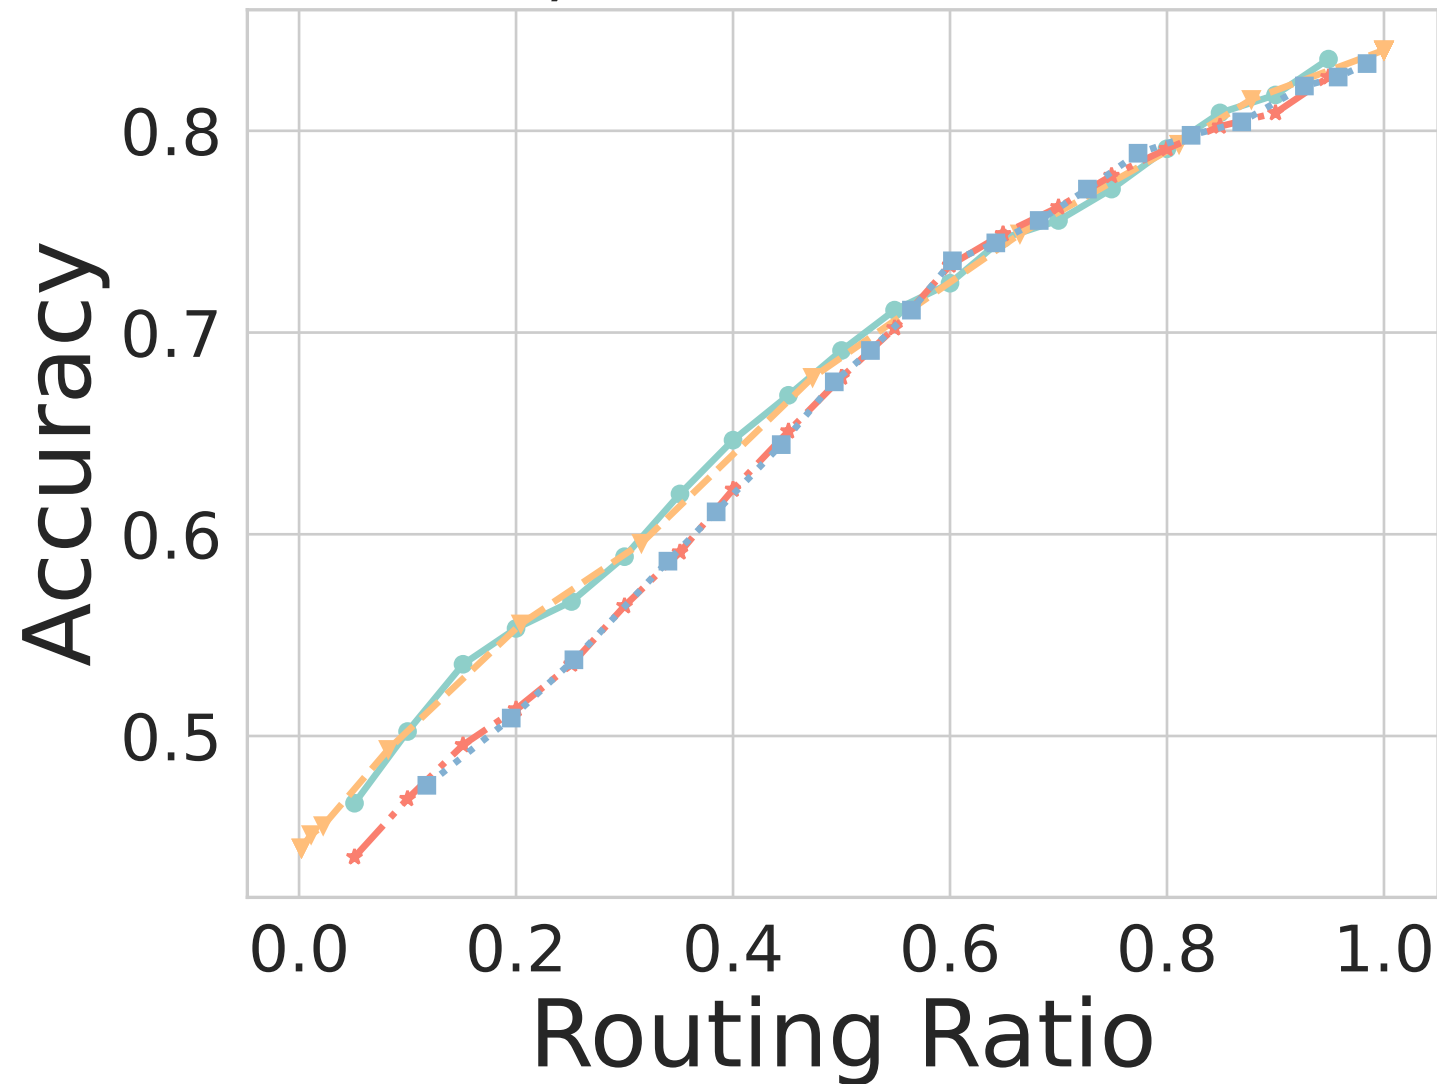

Supplement: supplementary_material [file cali_down_math_500_llama-3.2-3b_gpt-4.1-mini.pdf › Routing_SLM_LLMs/Proxy_routing_prediction/to_gpt-4.1-mini/math_500_as_downstream/cali_down_math_500_llama-3.2-3b_gpt-4.1-mini.pdf]

**MATH-500, mistral-7b to GPT-4.1 mini**

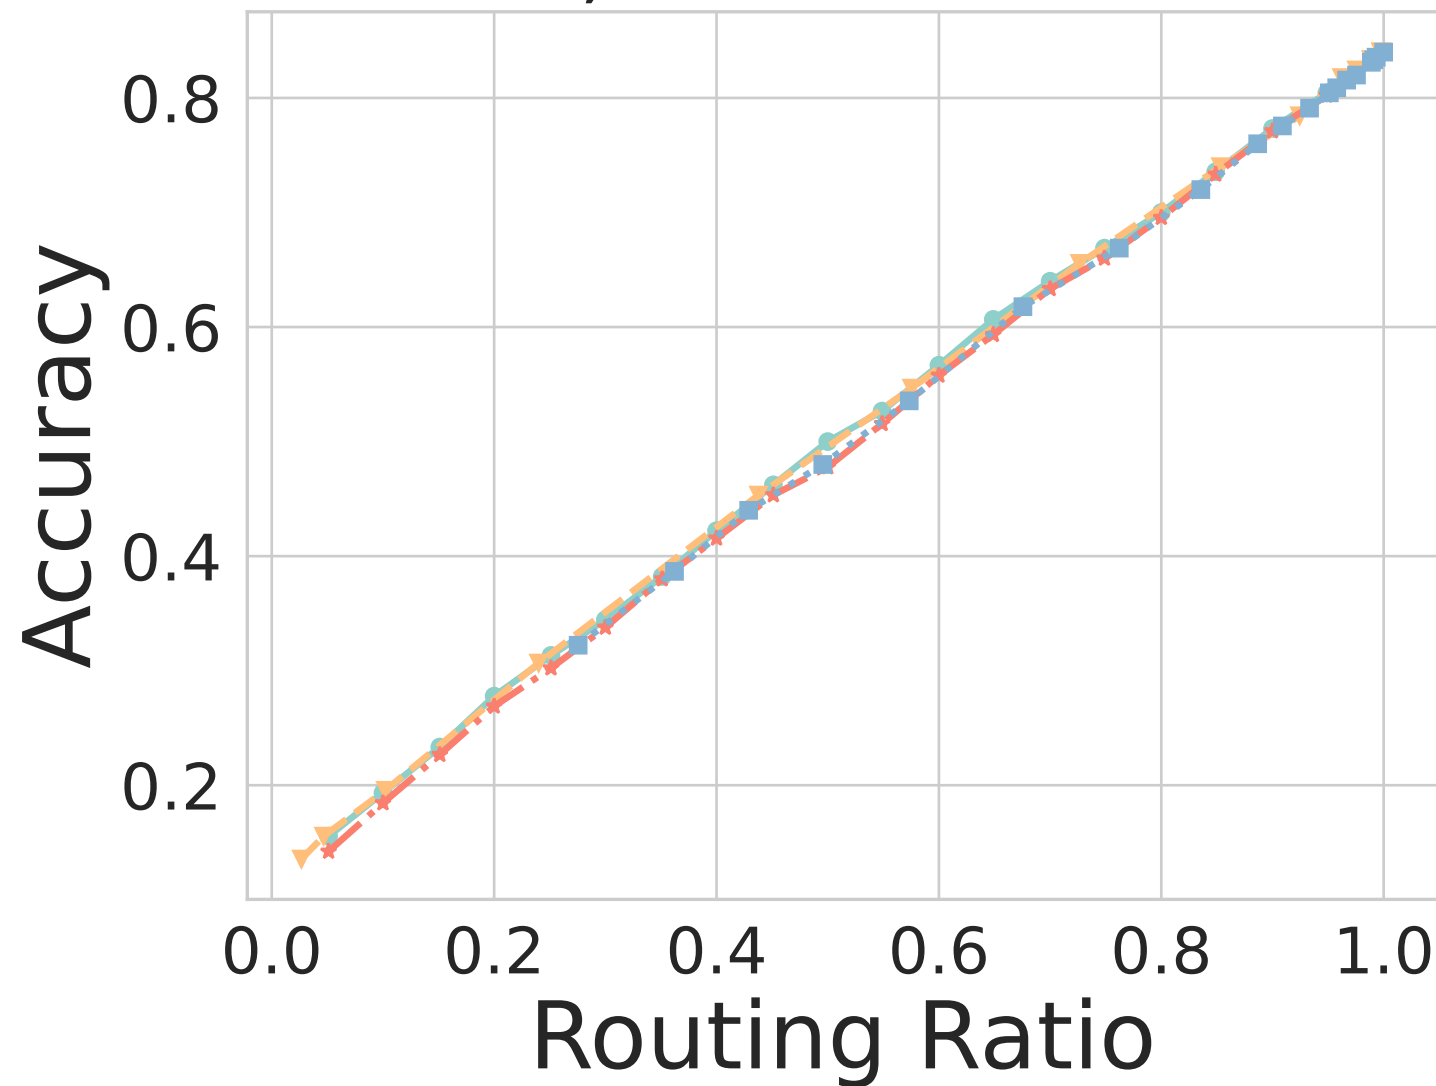

Supplement: supplementary_material [file cali_down_math_500_mistral-7b_gpt-4.1-mini.pdf › Routing_SLM_LLMs/Proxy_routing_prediction/to_gpt-4.1-mini/math_500_as_downstream/cali_down_math_500_mistral-7b_gpt-4.1-mini.pdf]

**MATH-500, phi-3.5-mini to GPT-4.1 mini**

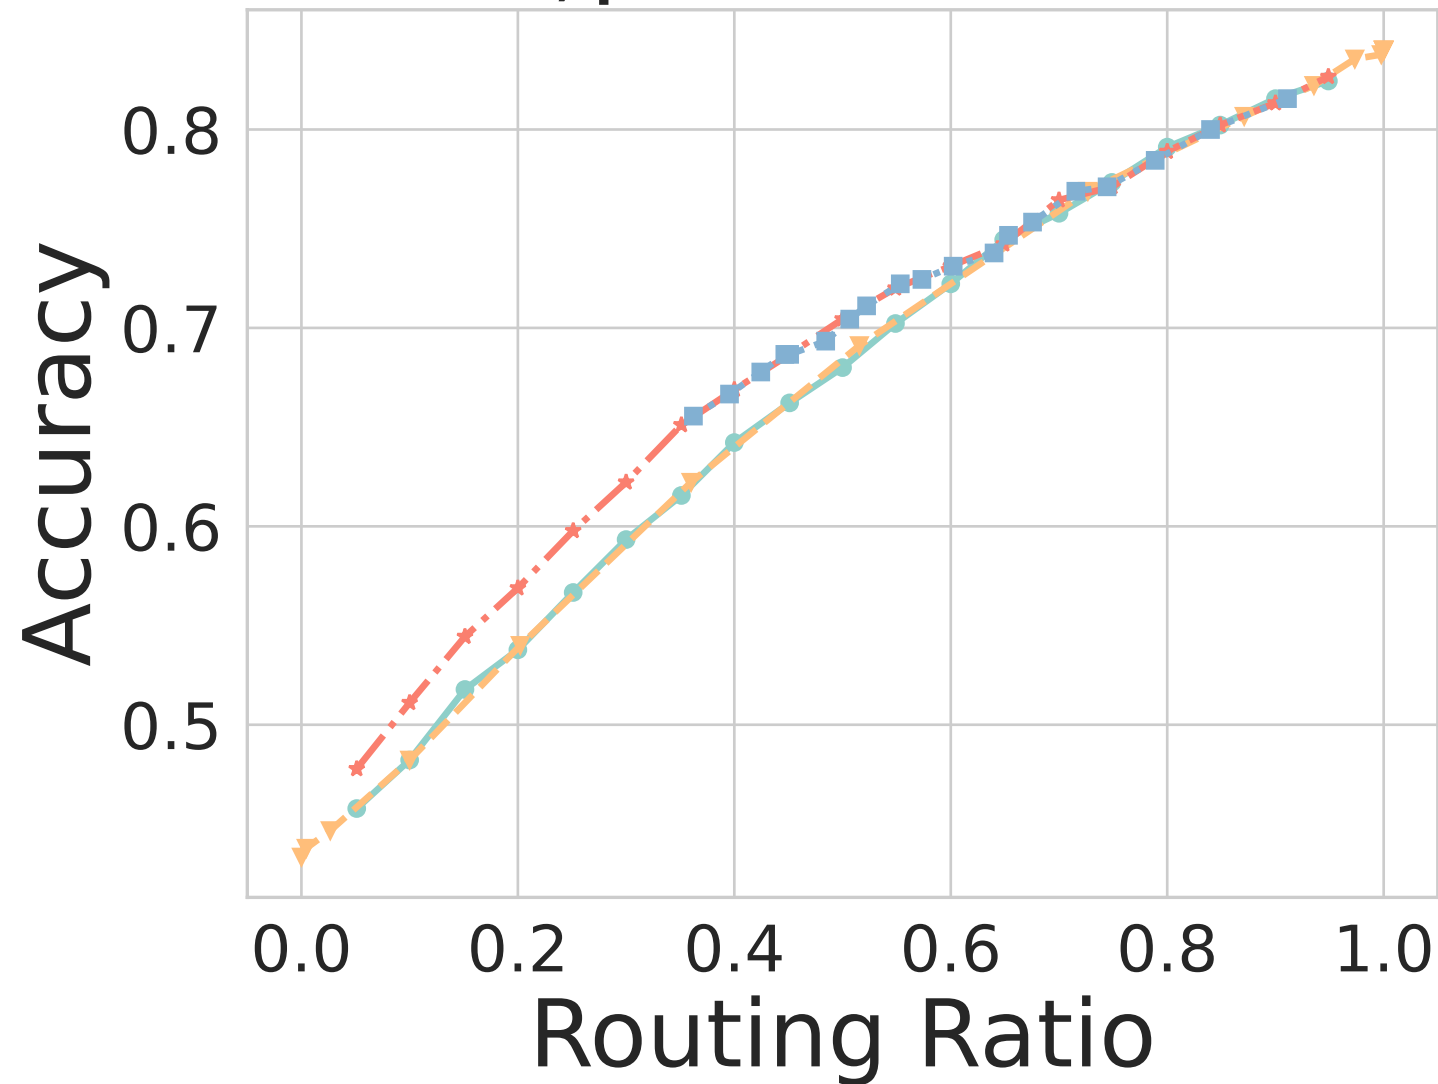

Supplement: supplementary_material [file cali_down_math_500_phi-3.5-mini_gpt-4.1-mini.pdf › Routing_SLM_LLMs/Proxy_routing_prediction/to_gpt-4.1-mini/math_500_as_downstream/cali_down_math_500_phi-3.5-mini_gpt-4.1-mini.pdf]

**MATH-500, phi-4-mini-reasoning to GPT-4.1 mini**

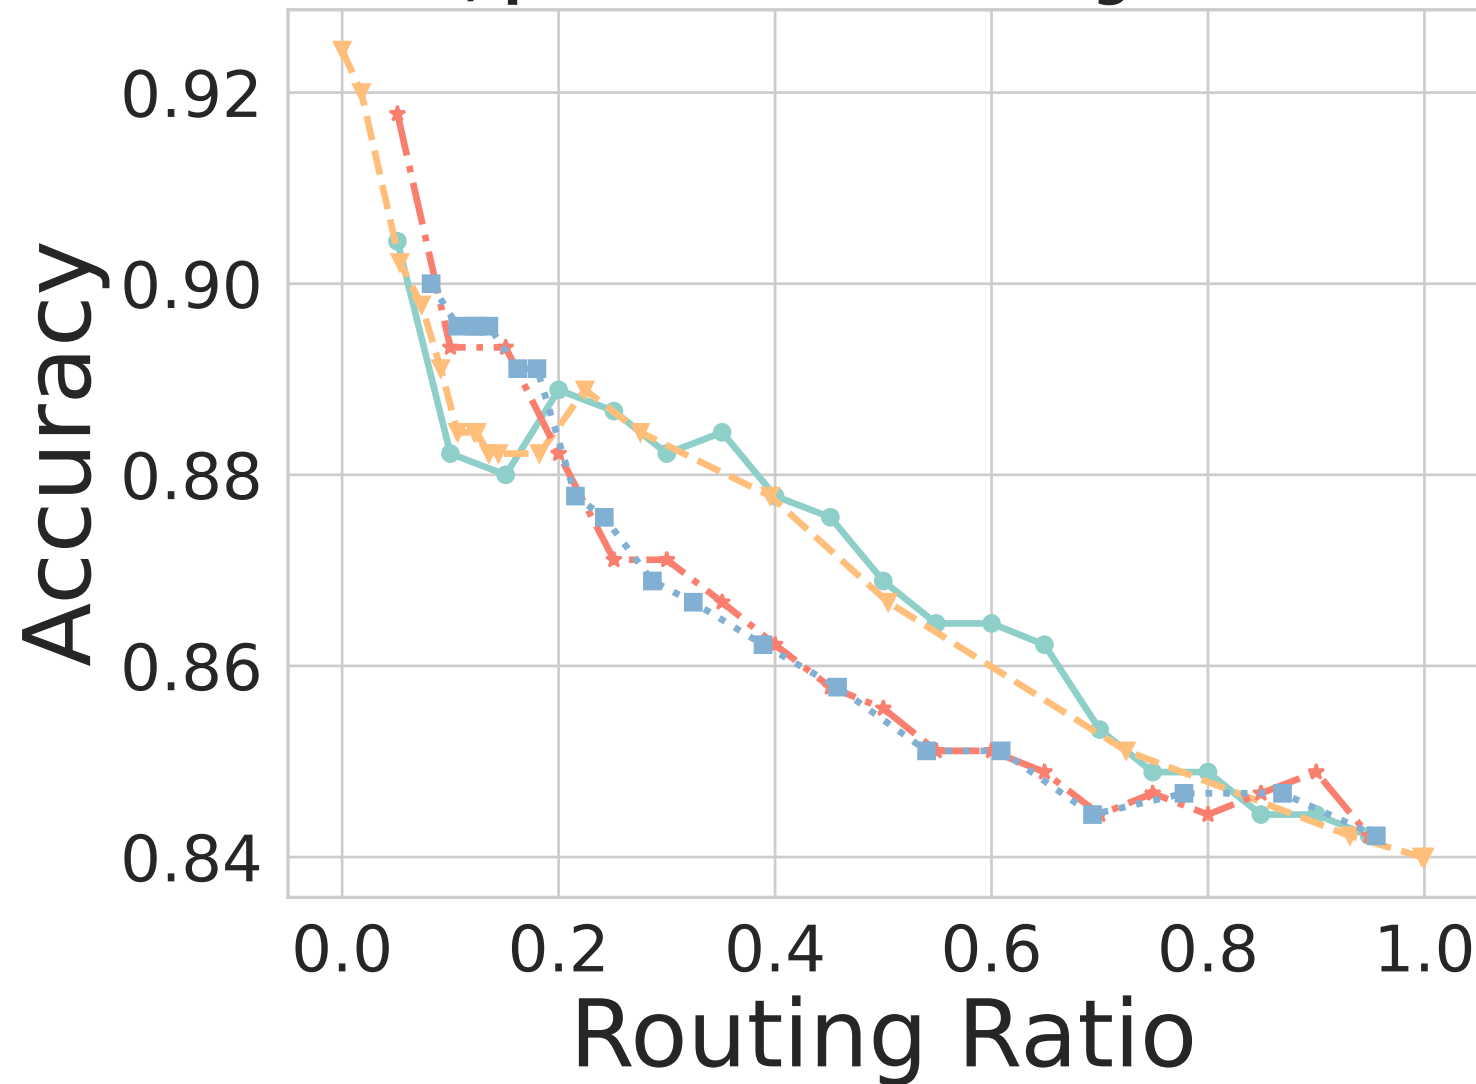

Supplement: supplementary_material [file cali_down_math_500_phi-4-mini-reasoning_gpt-4.1-mini.pdf › Routing_SLM_LLMs/Proxy_routing_prediction/to_gpt-4.1-mini/math_500_as_downstream/cali_down_math_500_phi-4-mini-reasoning_gpt-4.1-mini.pdf]

**MATH-500, qwen-2.5-7b to GPT-4.1 mini**

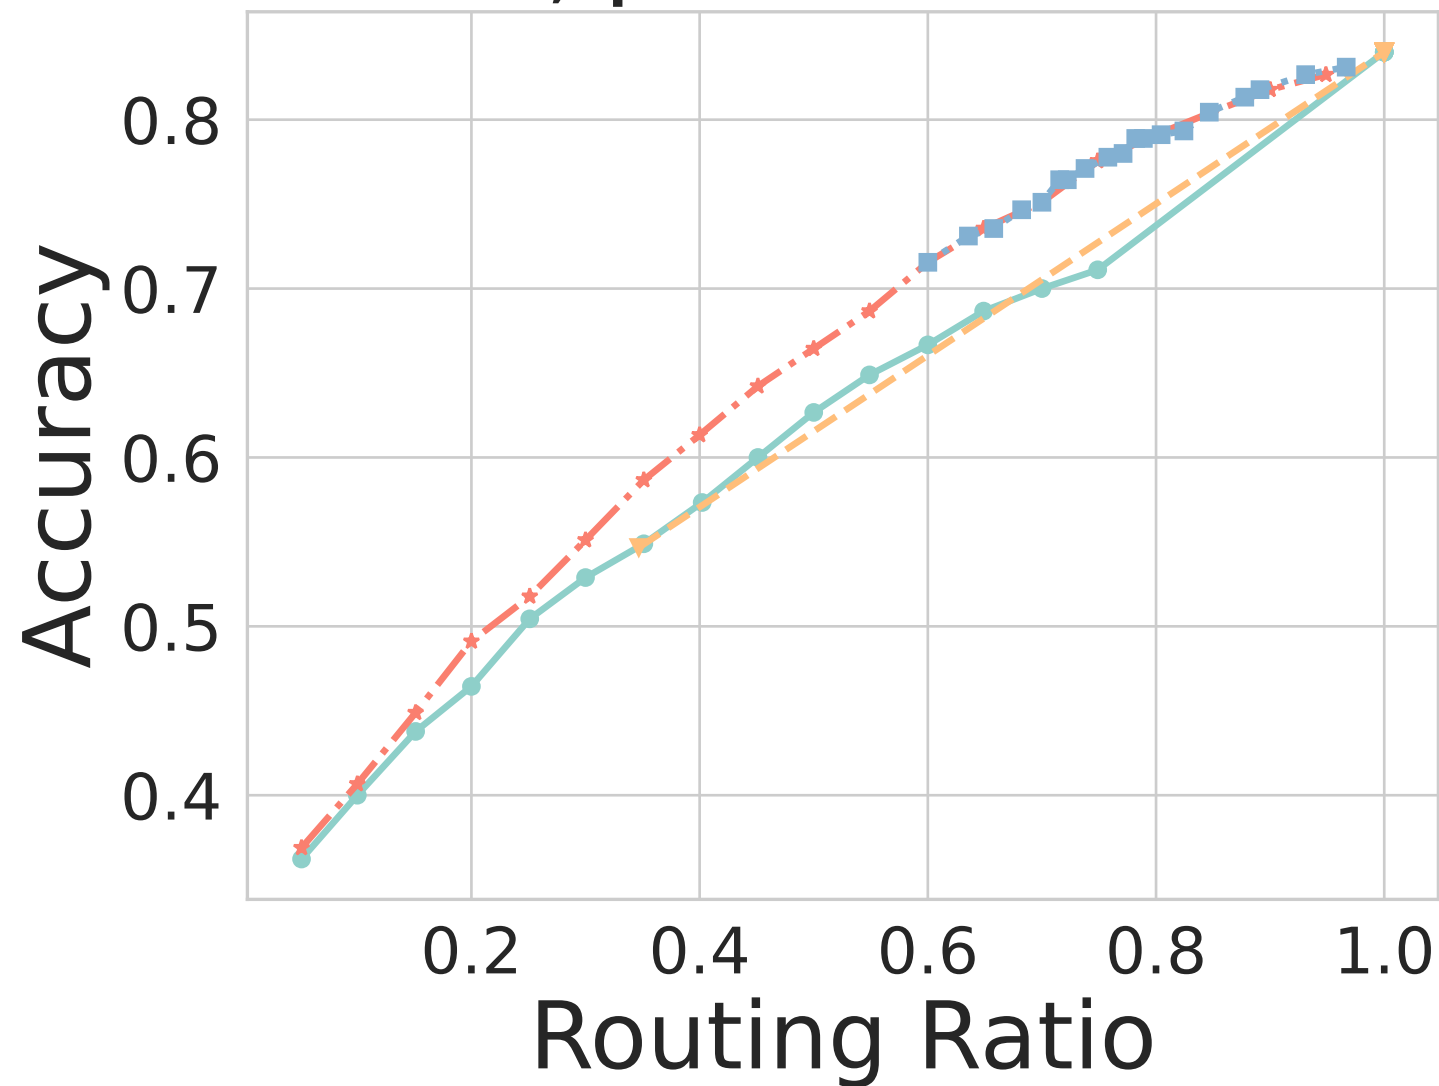

Supplement: supplementary_material [file cali_down_math_500_qwen-2.5-7b_gpt-4.1-mini.pdf › Routing_SLM_LLMs/Proxy_routing_prediction/to_gpt-4.1-mini/math_500_as_downstream/cali_down_math_500_qwen-2.5-7b_gpt-4.1-mini.pdf]

**MATH-500, rwkv to GPT-4.1 mini**

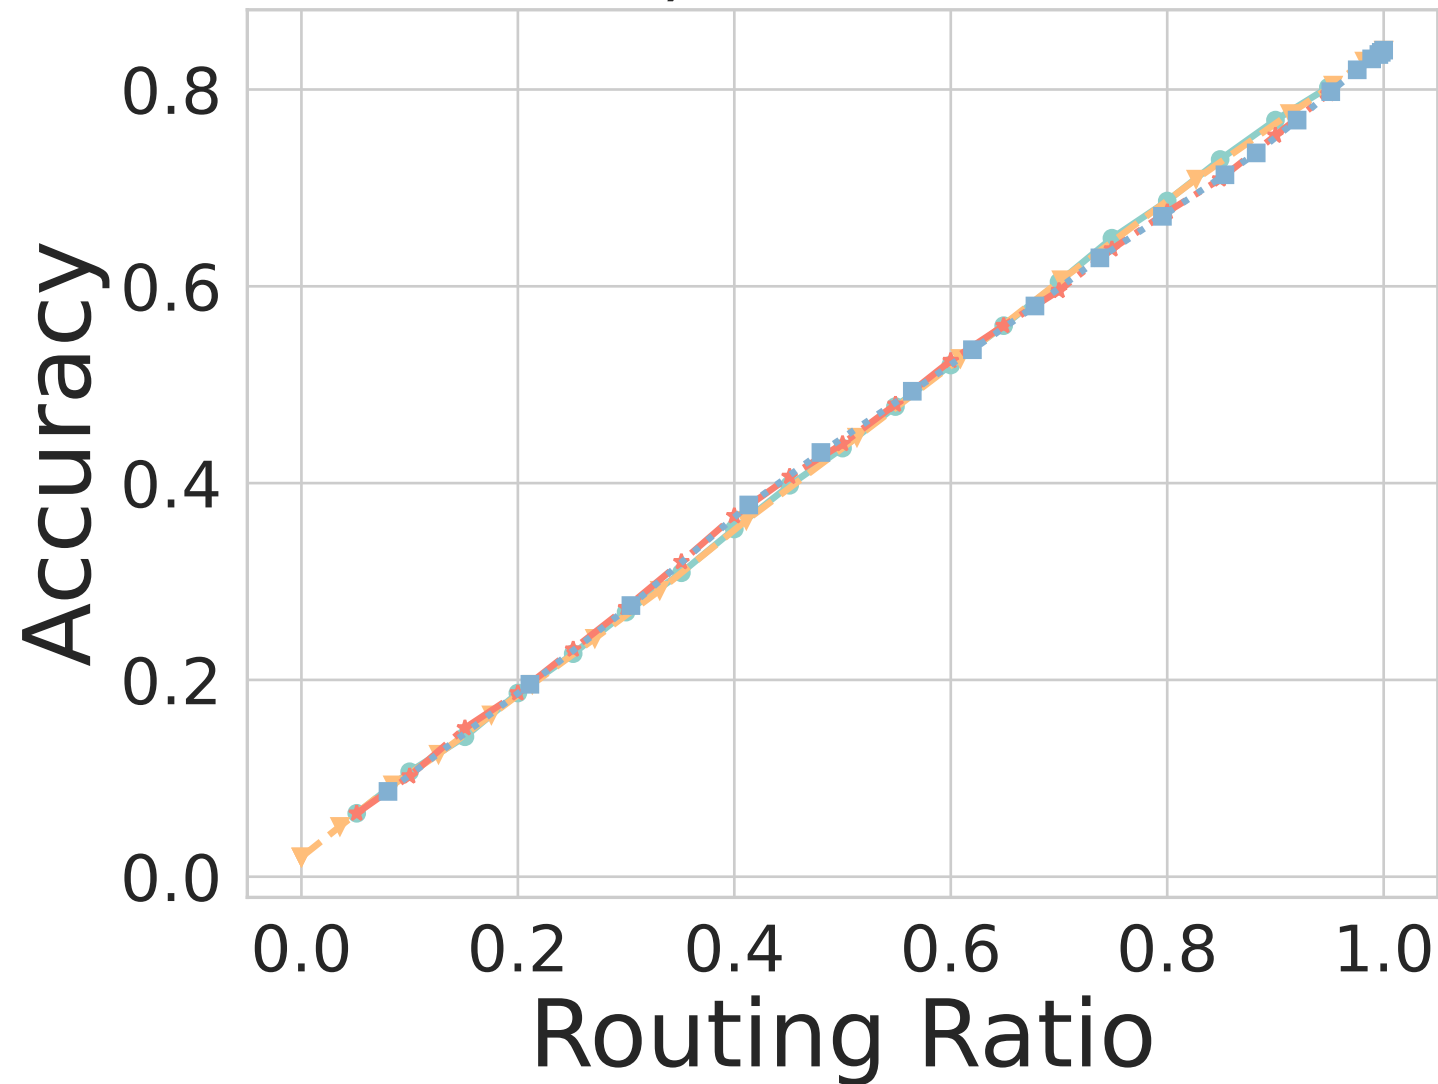

Supplement: supplementary_material [file cali_down_math_500_rwkv_gpt-4.1-mini.pdf › Routing_SLM_LLMs/Proxy_routing_prediction/to_gpt-4.1-mini/math_500_as_downstream/cali_down_math_500_rwkv_gpt-4.1-mini.pdf]

**MMLU, Qwen3-0.6B to GPT-4.1 mini**

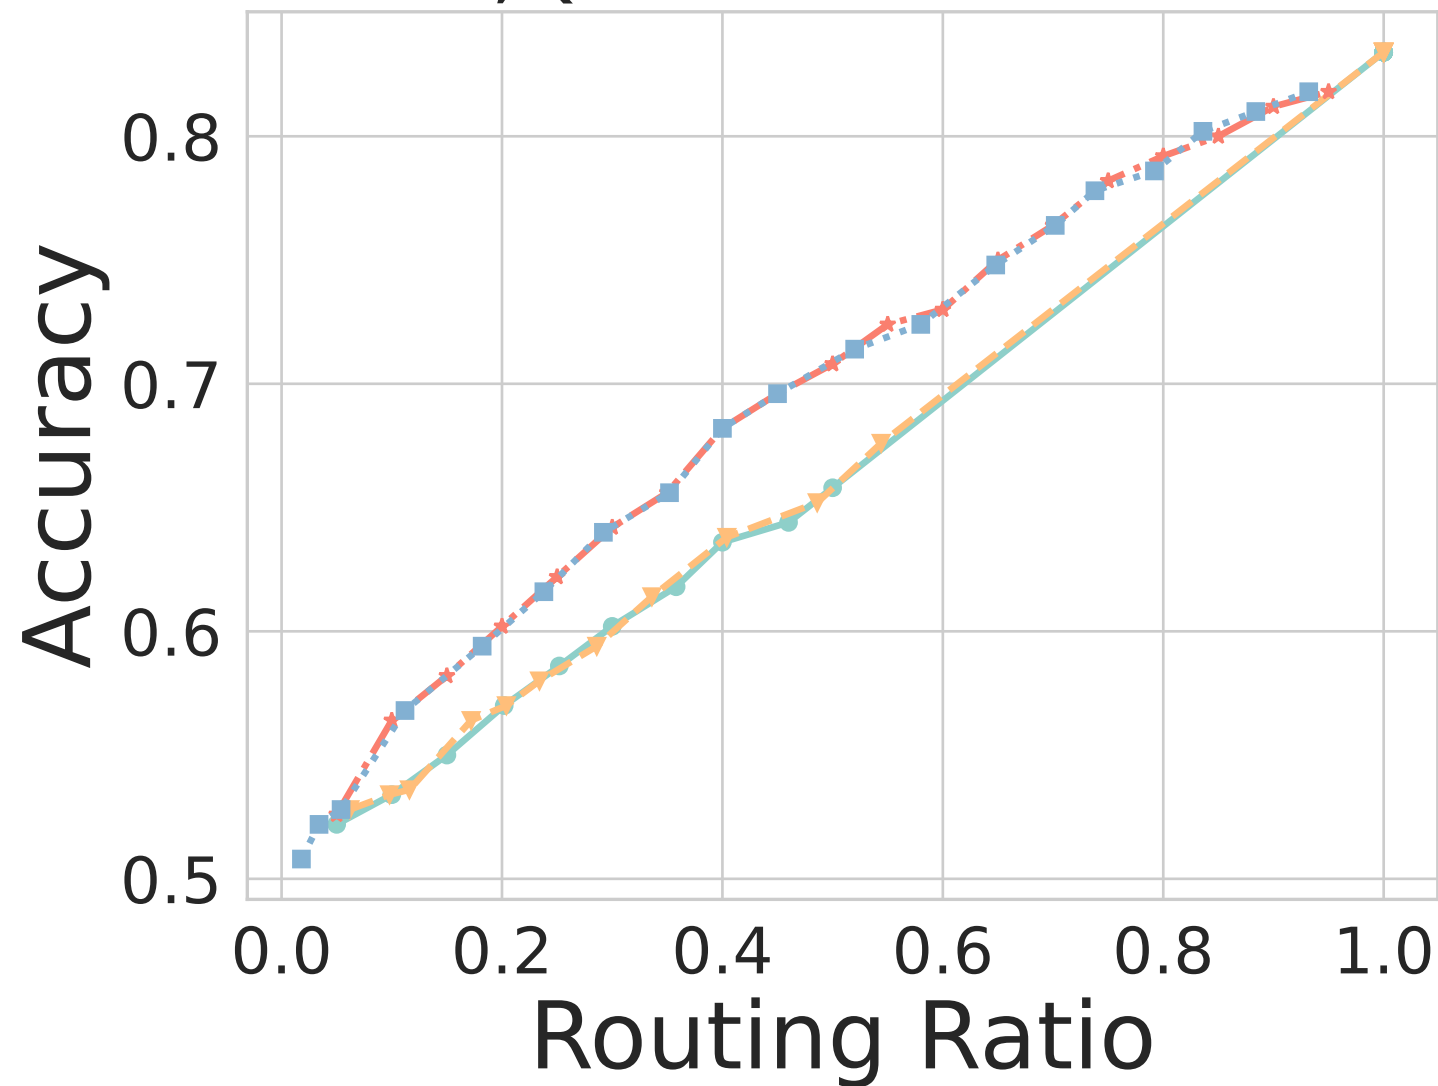

Supplement: supplementary_material [file cali_down_mmlu_Qwen3-0.6B_gpt-4.1-mini.pdf › Routing_SLM_LLMs/Proxy_routing_prediction/to_gpt-4.1-mini/mmlu_as_downstream/cali_down_mmlu_Qwen3-0.6B_gpt-4.1-mini.pdf]

**MMLU, Qwen3-1.7B to GPT-4.1 mini**

Accuracy

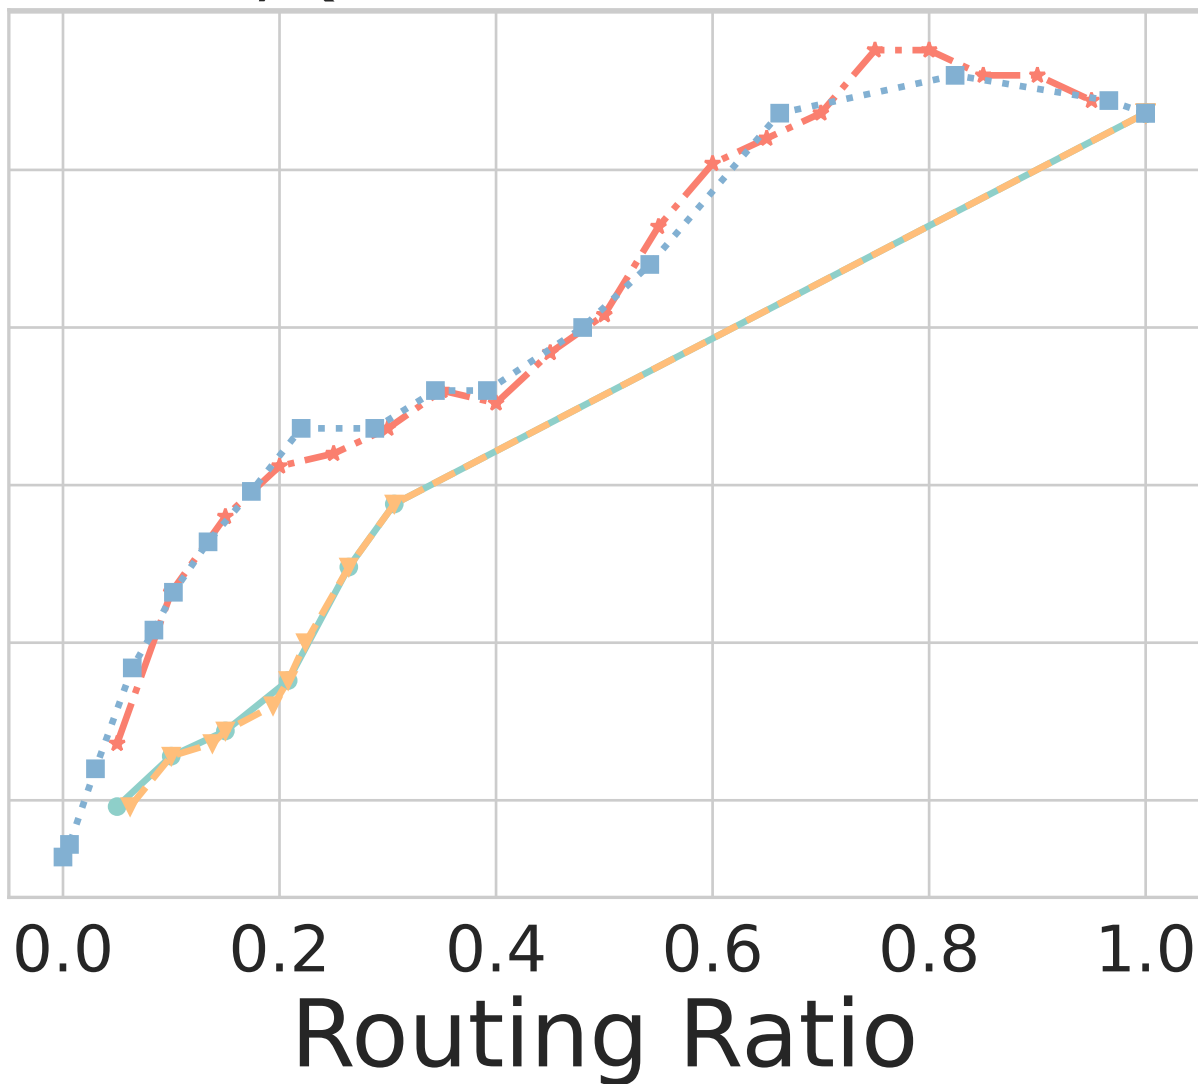

Supplement: supplementary_material [file cali_down_mmlu_Qwen3-1.7B_gpt-4.1-mini.pdf › Routing_SLM_LLMs/Proxy_routing_prediction/to_gpt-4.1-mini/mmlu_as_downstream/cali_down_mmlu_Qwen3-1.7B_gpt-4.1-mini.pdf]

**MMLU, Qwen3-4B to GPT-4.1 mini**

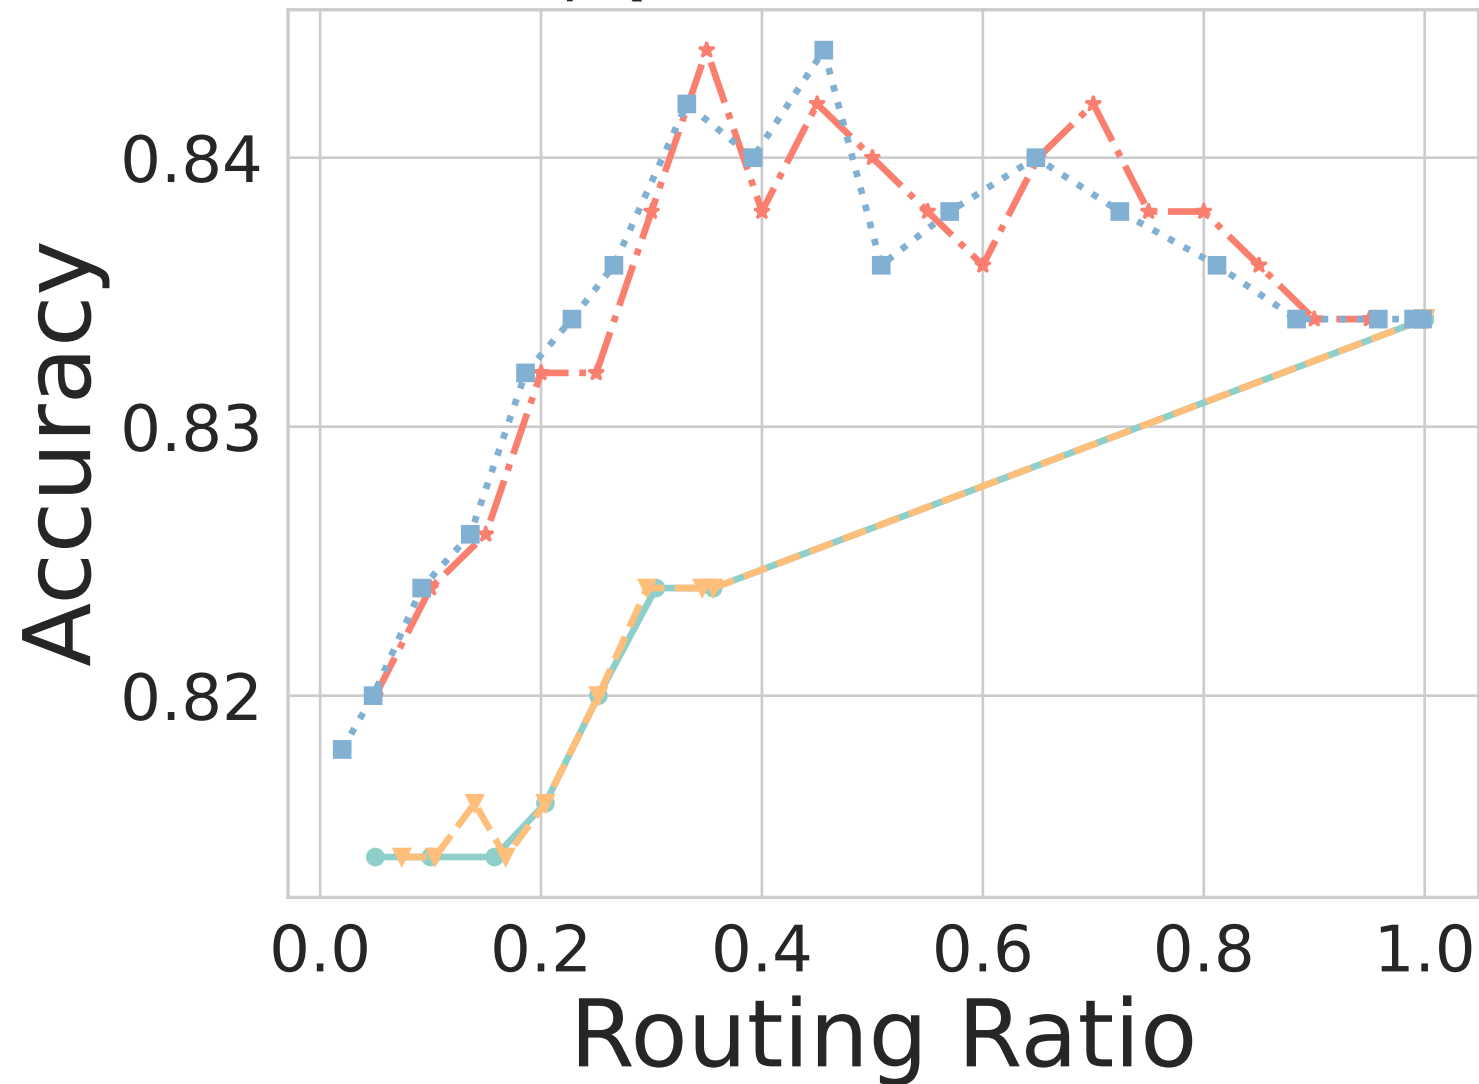

Supplement: supplementary_material [file cali_down_mmlu_Qwen3-4B_gpt-4.1-mini.pdf › Routing_SLM_LLMs/Proxy_routing_prediction/to_gpt-4.1-mini/mmlu_as_downstream/cali_down_mmlu_Qwen3-4B_gpt-4.1-mini.pdf]

**MMLU, granite-3.1-8b to GPT-4.1 mini**

Accuracy

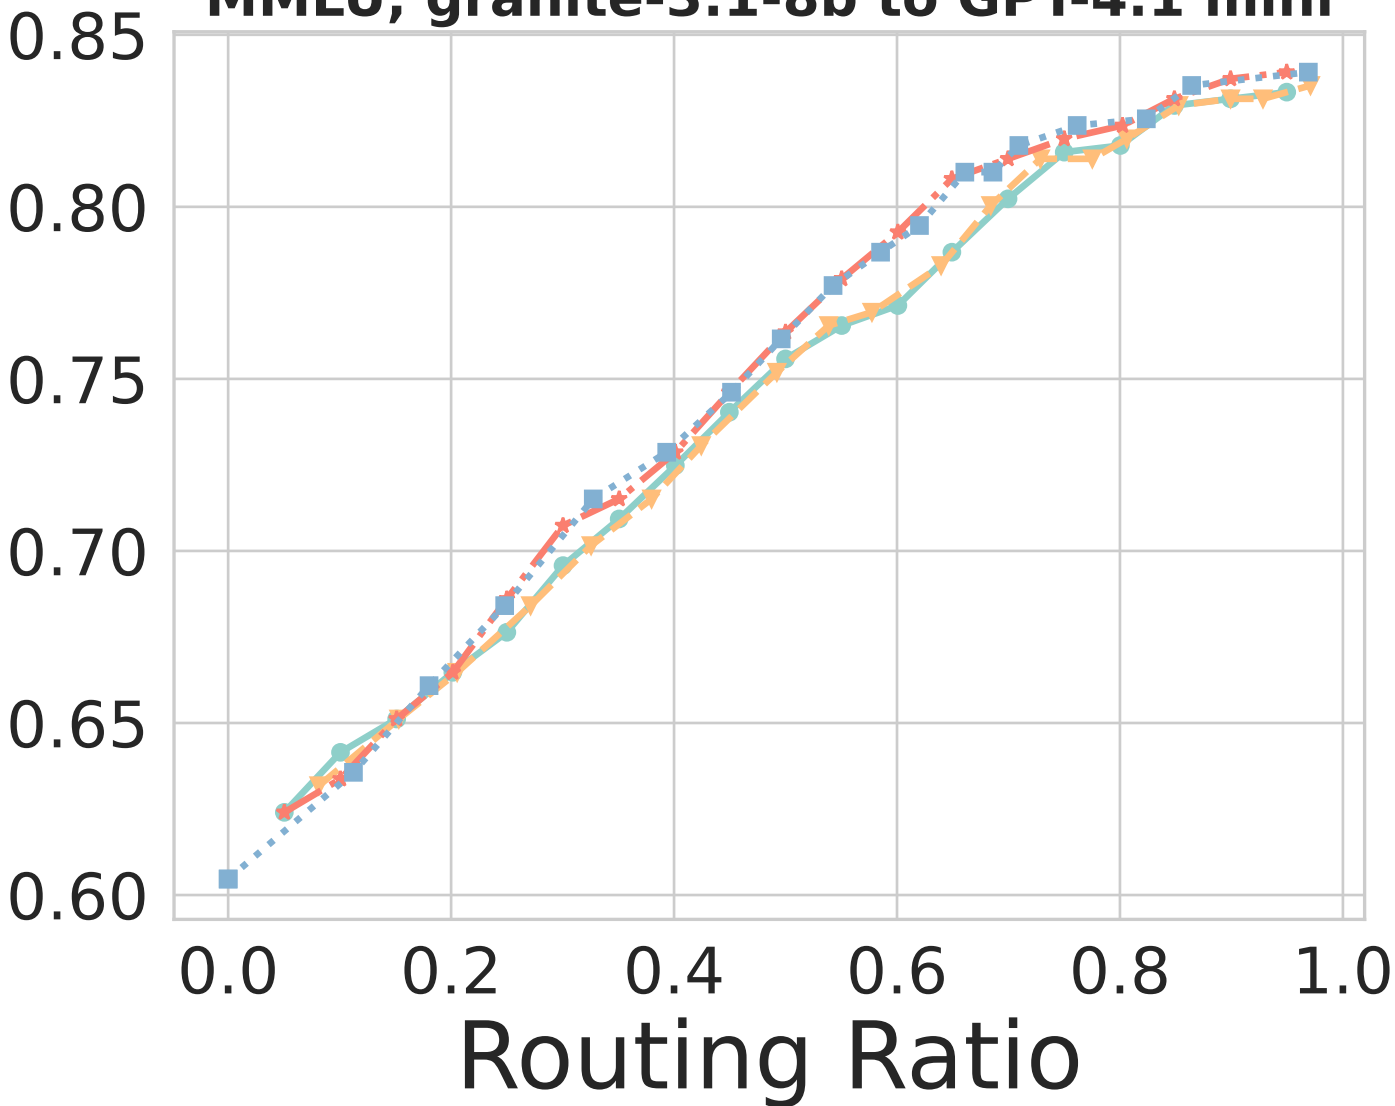

Supplement: supplementary_material [file cali_down_mmlu_granite-3.1-8b_gpt-4.1-mini.pdf › Routing_SLM_LLMs/Proxy_routing_prediction/to_gpt-4.1-mini/mmlu_as_downstream/cali_down_mmlu_granite-3.1-8b_gpt-4.1-mini.pdf]

**MMLU, llama-3.1-8b to GPT-4.1 mini**

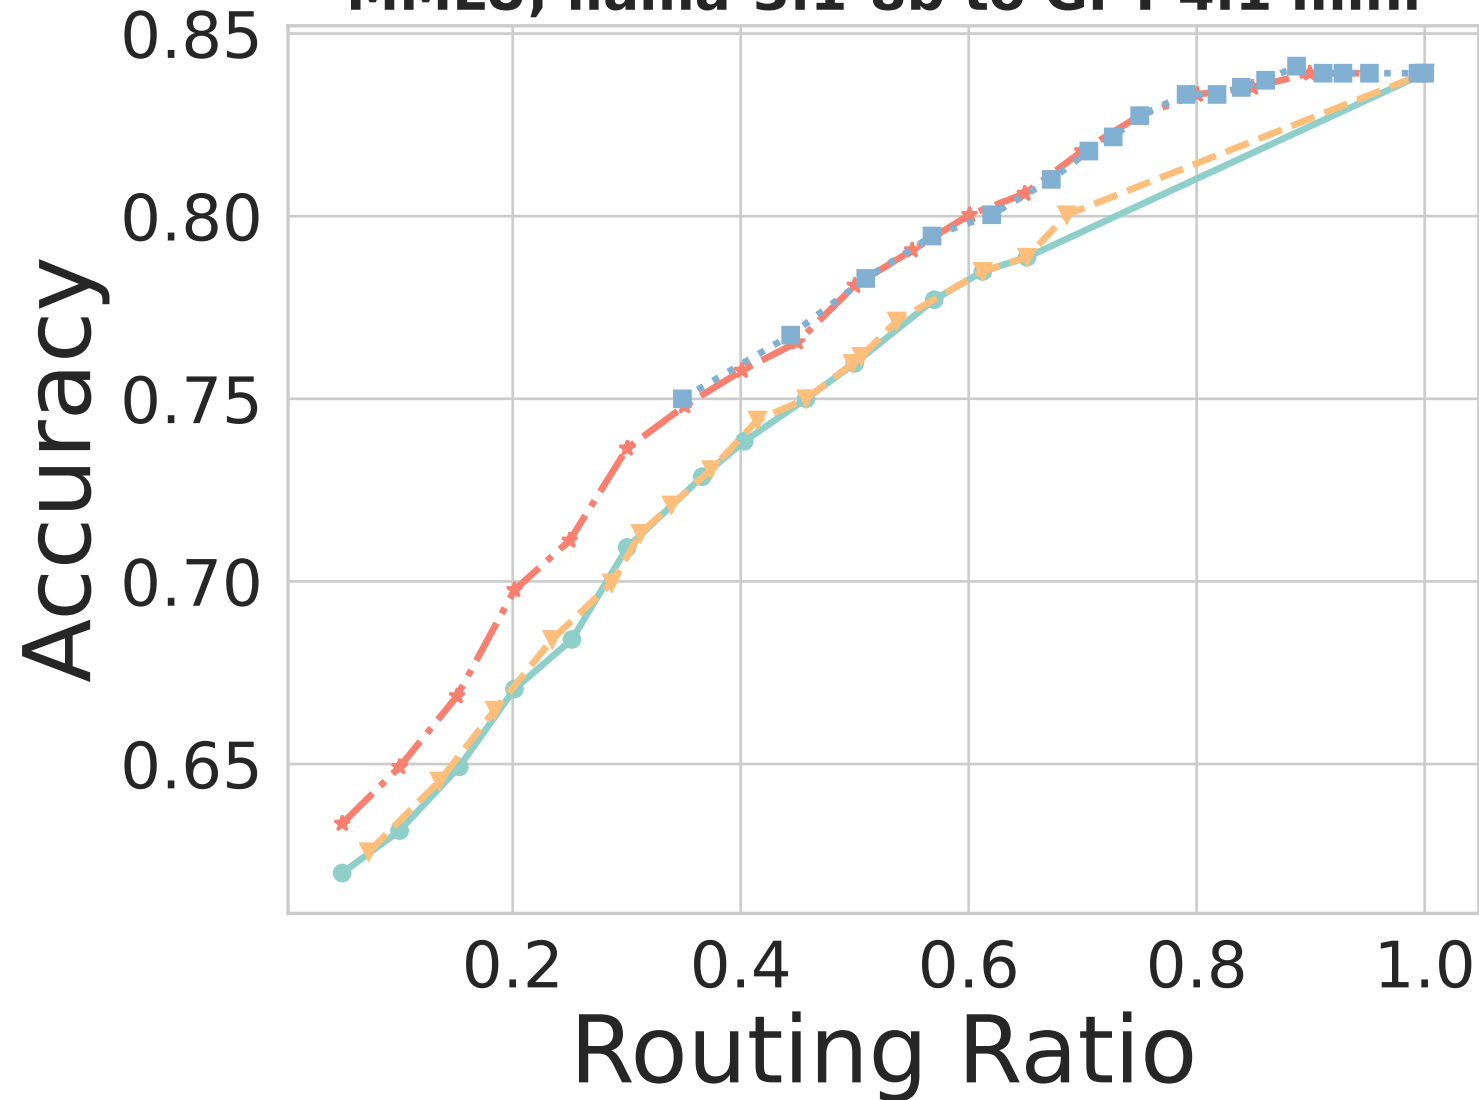

Supplement: supplementary_material [file cali_down_mmlu_llama-3.1-8b_gpt-4.1-mini.pdf › Routing_SLM_LLMs/Proxy_routing_prediction/to_gpt-4.1-mini/mmlu_as_downstream/cali_down_mmlu_llama-3.1-8b_gpt-4.1-mini.pdf]

**MMLU, llama-3.2-1b to GPT-4.1 mini**

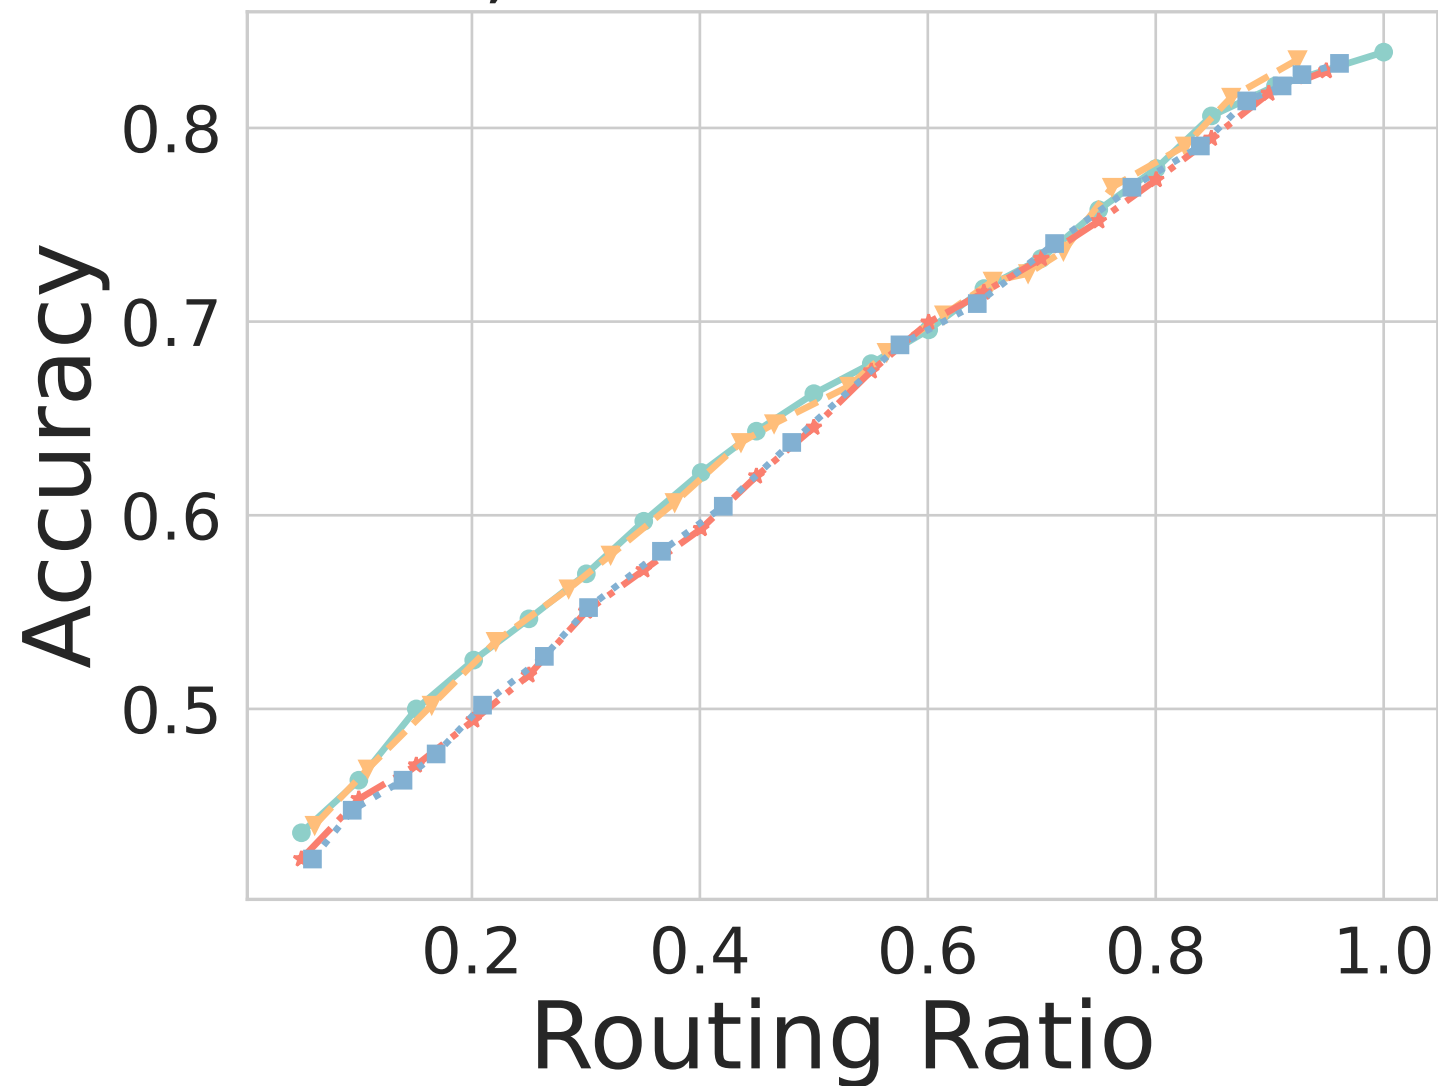

Supplement: supplementary_material [file cali_down_mmlu_llama-3.2-1b_gpt-4.1-mini.pdf › Routing_SLM_LLMs/Proxy_routing_prediction/to_gpt-4.1-mini/mmlu_as_downstream/cali_down_mmlu_llama-3.2-1b_gpt-4.1-mini.pdf]

**MMLU, llama-3.2-3b to GPT-4.1 mini**

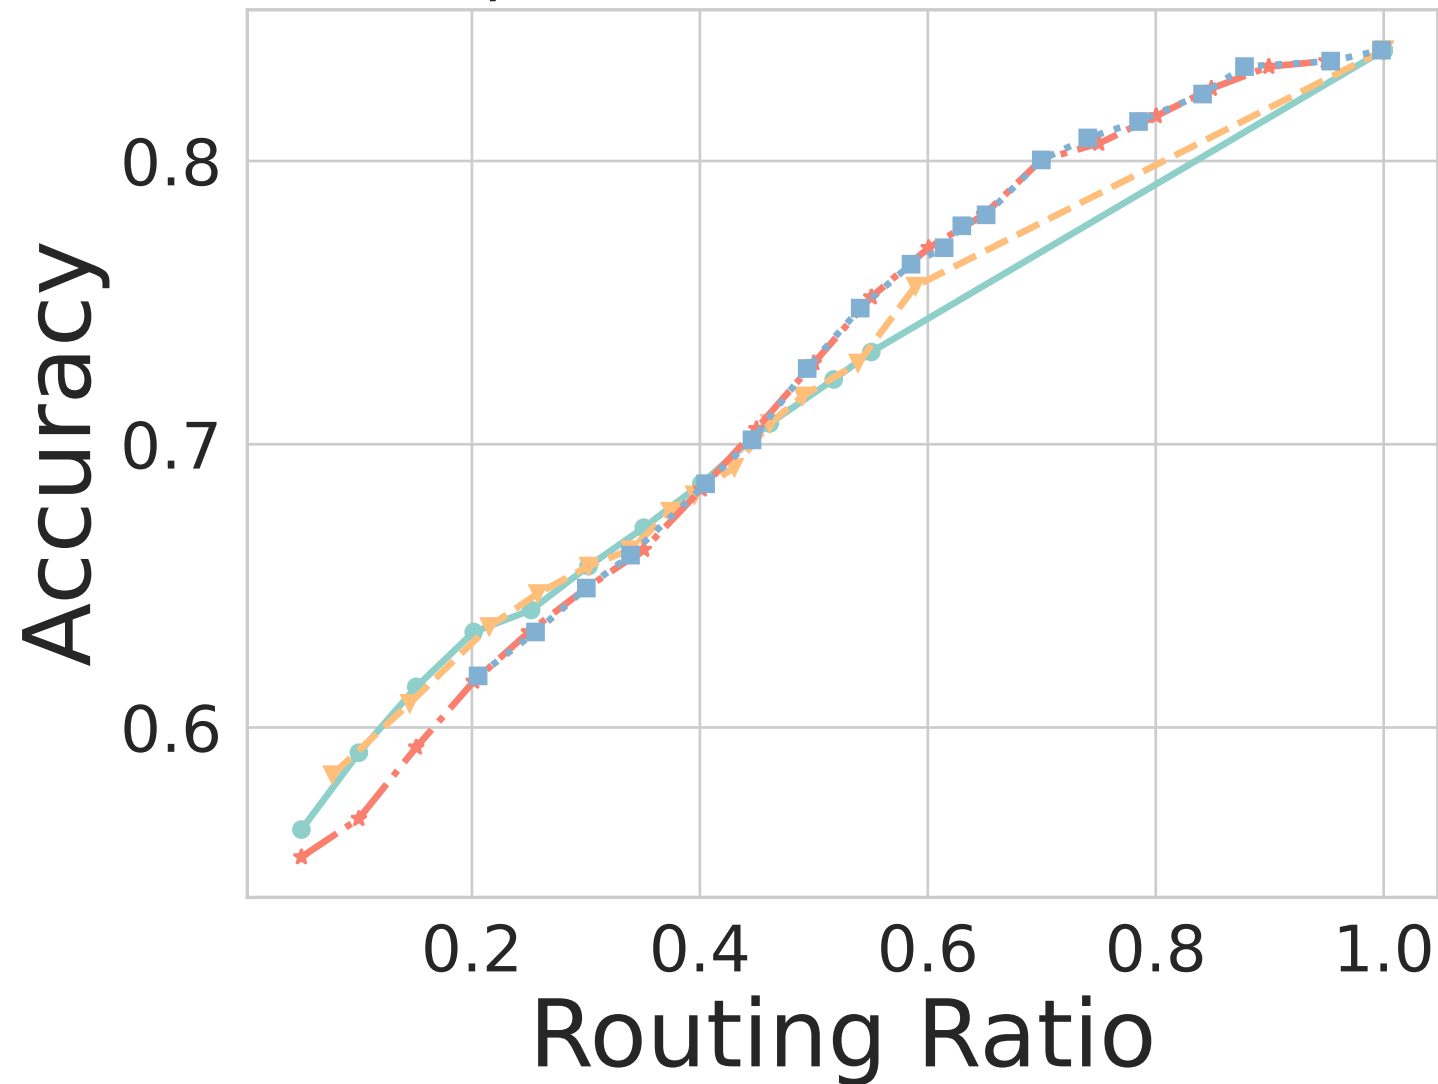

Supplement: supplementary_material [file cali_down_mmlu_llama-3.2-3b_gpt-4.1-mini.pdf › Routing_SLM_LLMs/Proxy_routing_prediction/to_gpt-4.1-mini/mmlu_as_downstream/cali_down_mmlu_llama-3.2-3b_gpt-4.1-mini.pdf]

**MMLU, mistral-7b to GPT-4.1 mini**

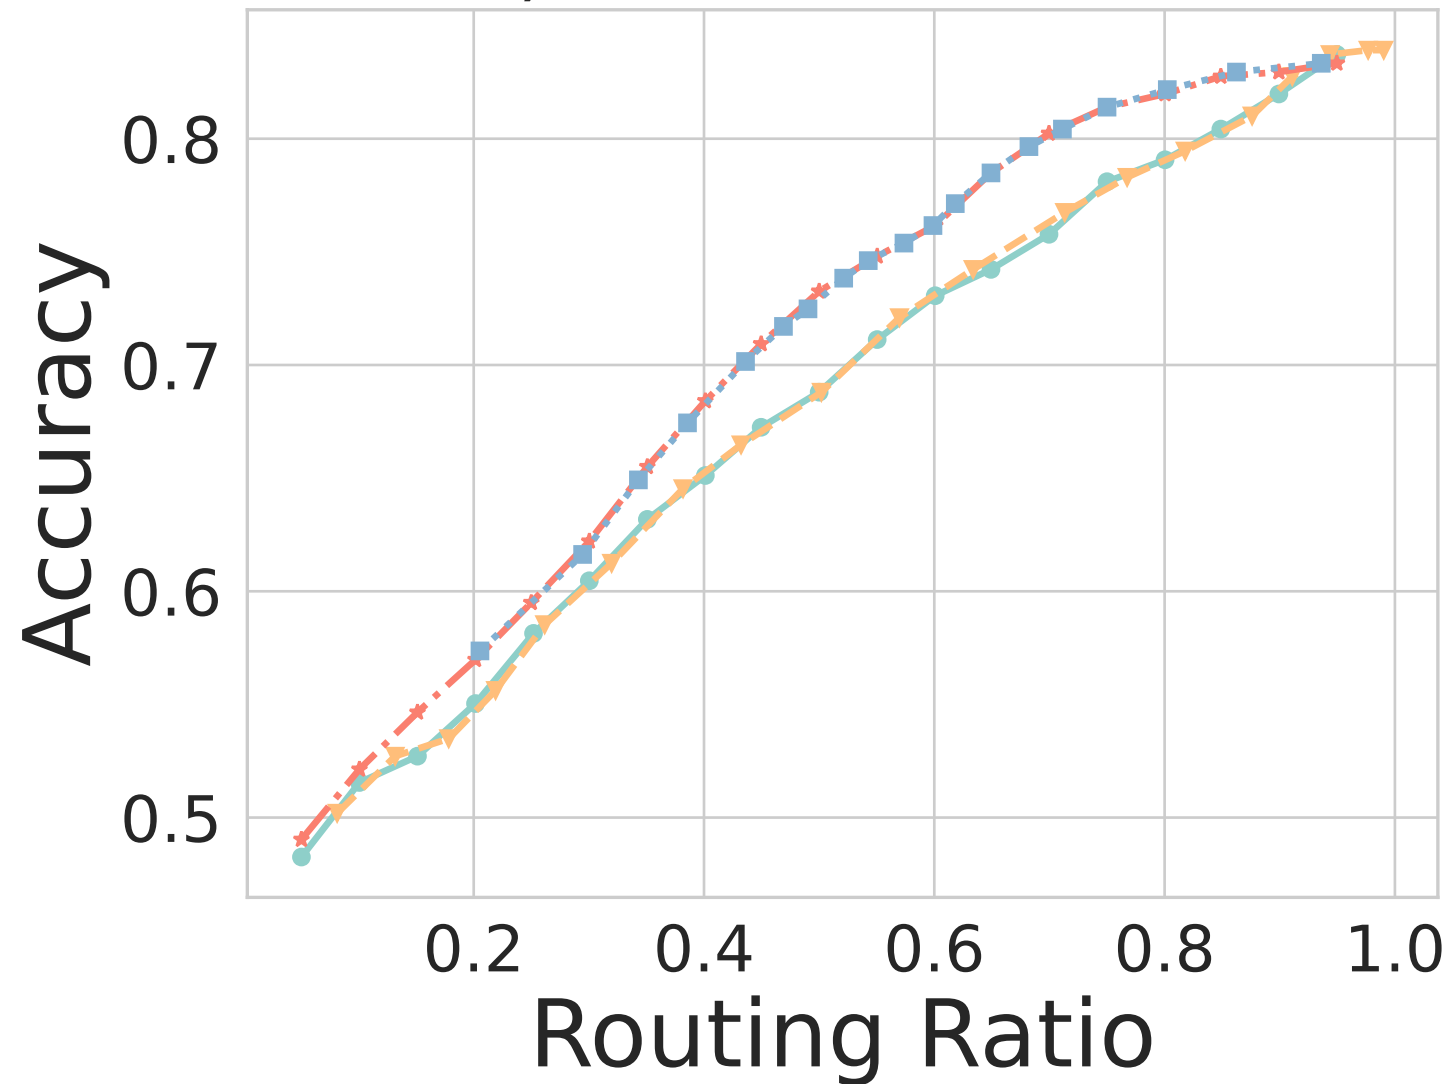

Supplement: supplementary_material [file cali_down_mmlu_mistral-7b_gpt-4.1-mini.pdf › Routing_SLM_LLMs/Proxy_routing_prediction/to_gpt-4.1-mini/mmlu_as_downstream/cali_down_mmlu_mistral-7b_gpt-4.1-mini.pdf]

**MMLU, phi-3.5-mini to GPT-4.1 mini**

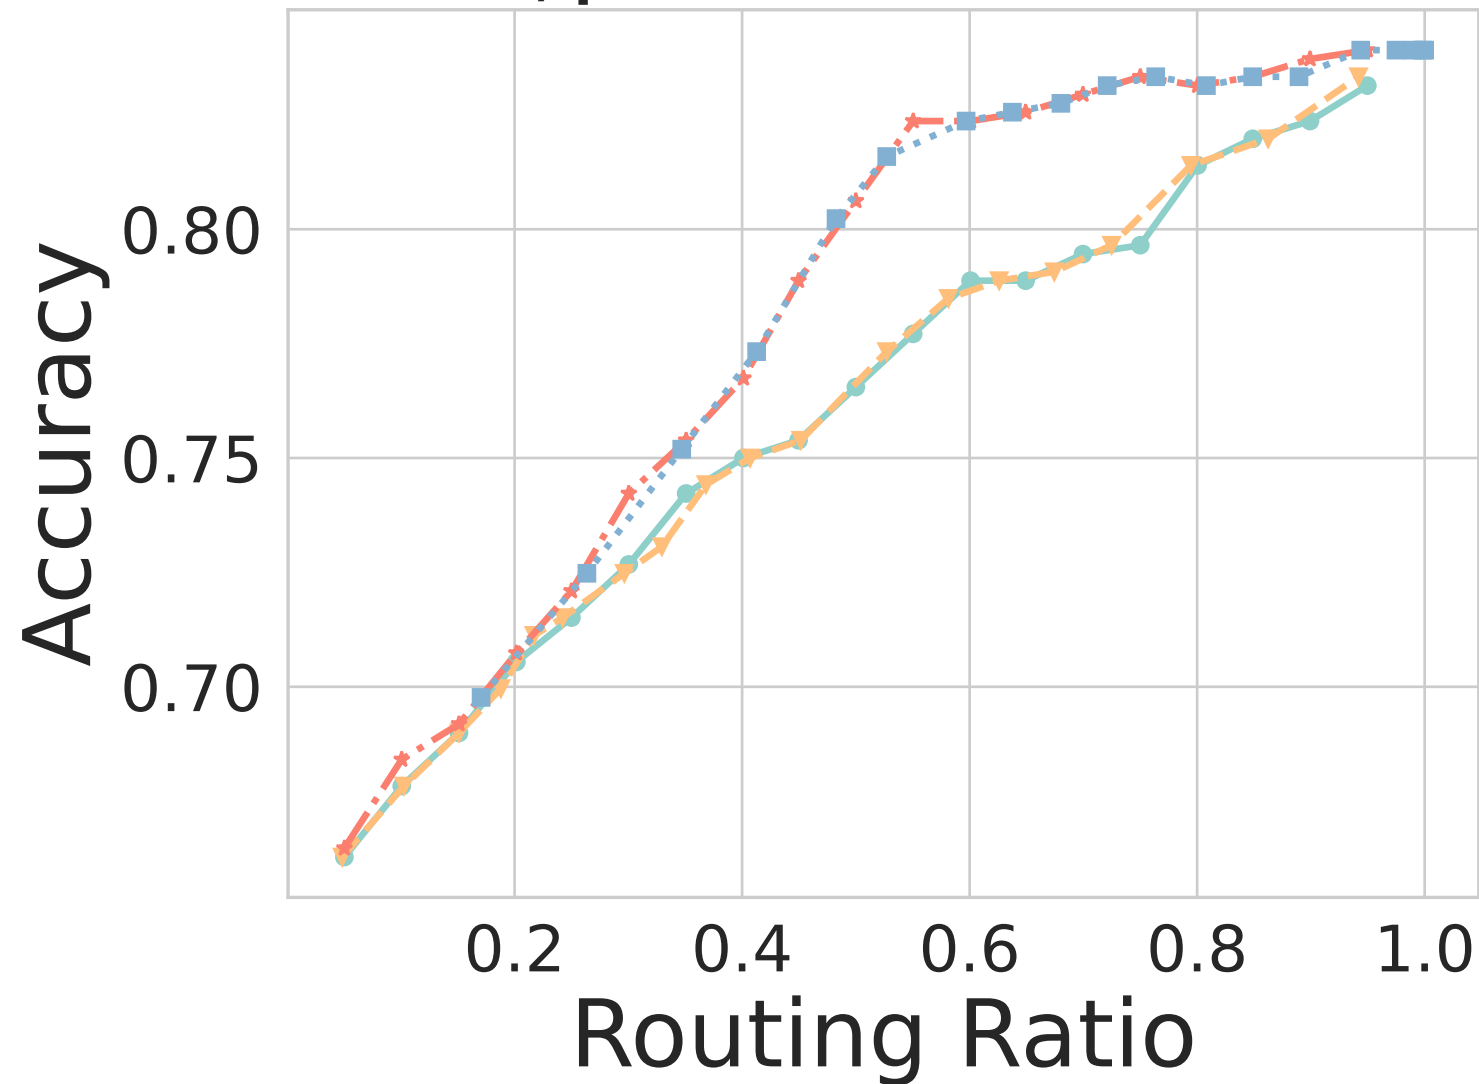

Supplement: supplementary_material [file cali_down_mmlu_phi-3.5-mini_gpt-4.1-mini.pdf › Routing_SLM_LLMs/Proxy_routing_prediction/to_gpt-4.1-mini/mmlu_as_downstream/cali_down_mmlu_phi-3.5-mini_gpt-4.1-mini.pdf]

**MMLU, phi-4-mini-reasoning to GPT-4.1 mini**

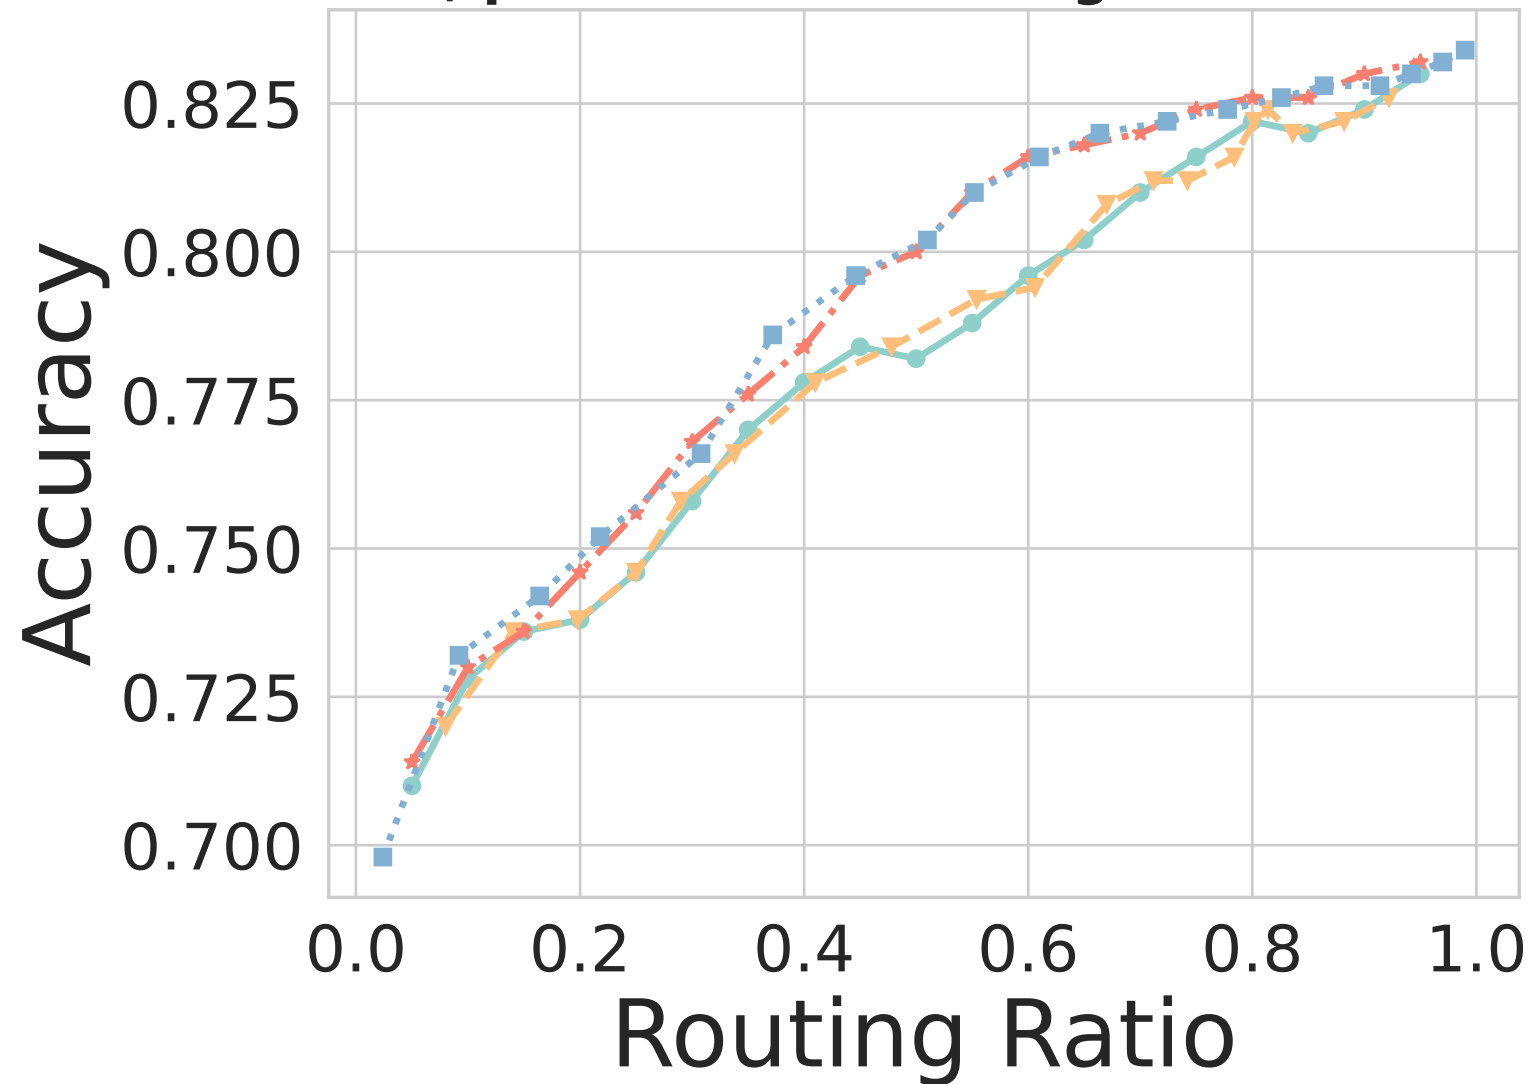

Supplement: supplementary_material [file cali_down_mmlu_phi-4-mini-reasoning_gpt-4.1-mini.pdf › Routing_SLM_LLMs/Proxy_routing_prediction/to_gpt-4.1-mini/mmlu_as_downstream/cali_down_mmlu_phi-4-mini-reasoning_gpt-4.1-mini.pdf]

**MMLU, qwen-2.5-7b to GPT-4.1 mini**

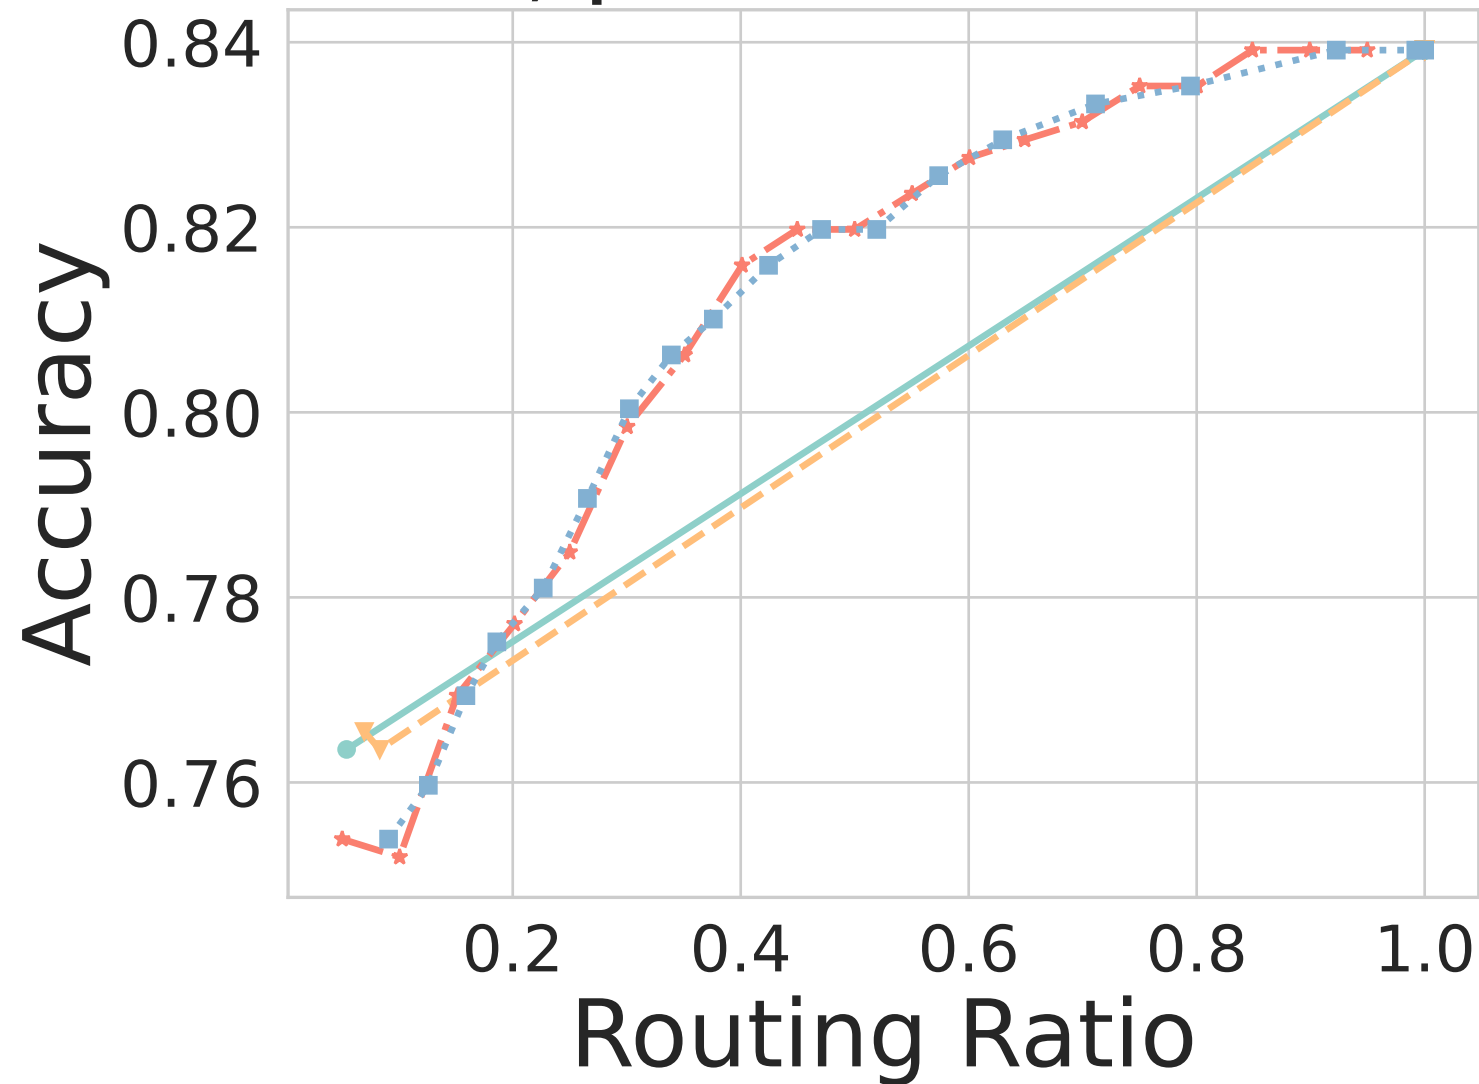

Supplement: supplementary_material [file cali_down_mmlu_qwen-2.5-7b_gpt-4.1-mini.pdf › Routing_SLM_LLMs/Proxy_routing_prediction/to_gpt-4.1-mini/mmlu_as_downstream/cali_down_mmlu_qwen-2.5-7b_gpt-4.1-mini.pdf]

**MMLU, rwkv to GPT-4.1 mini**

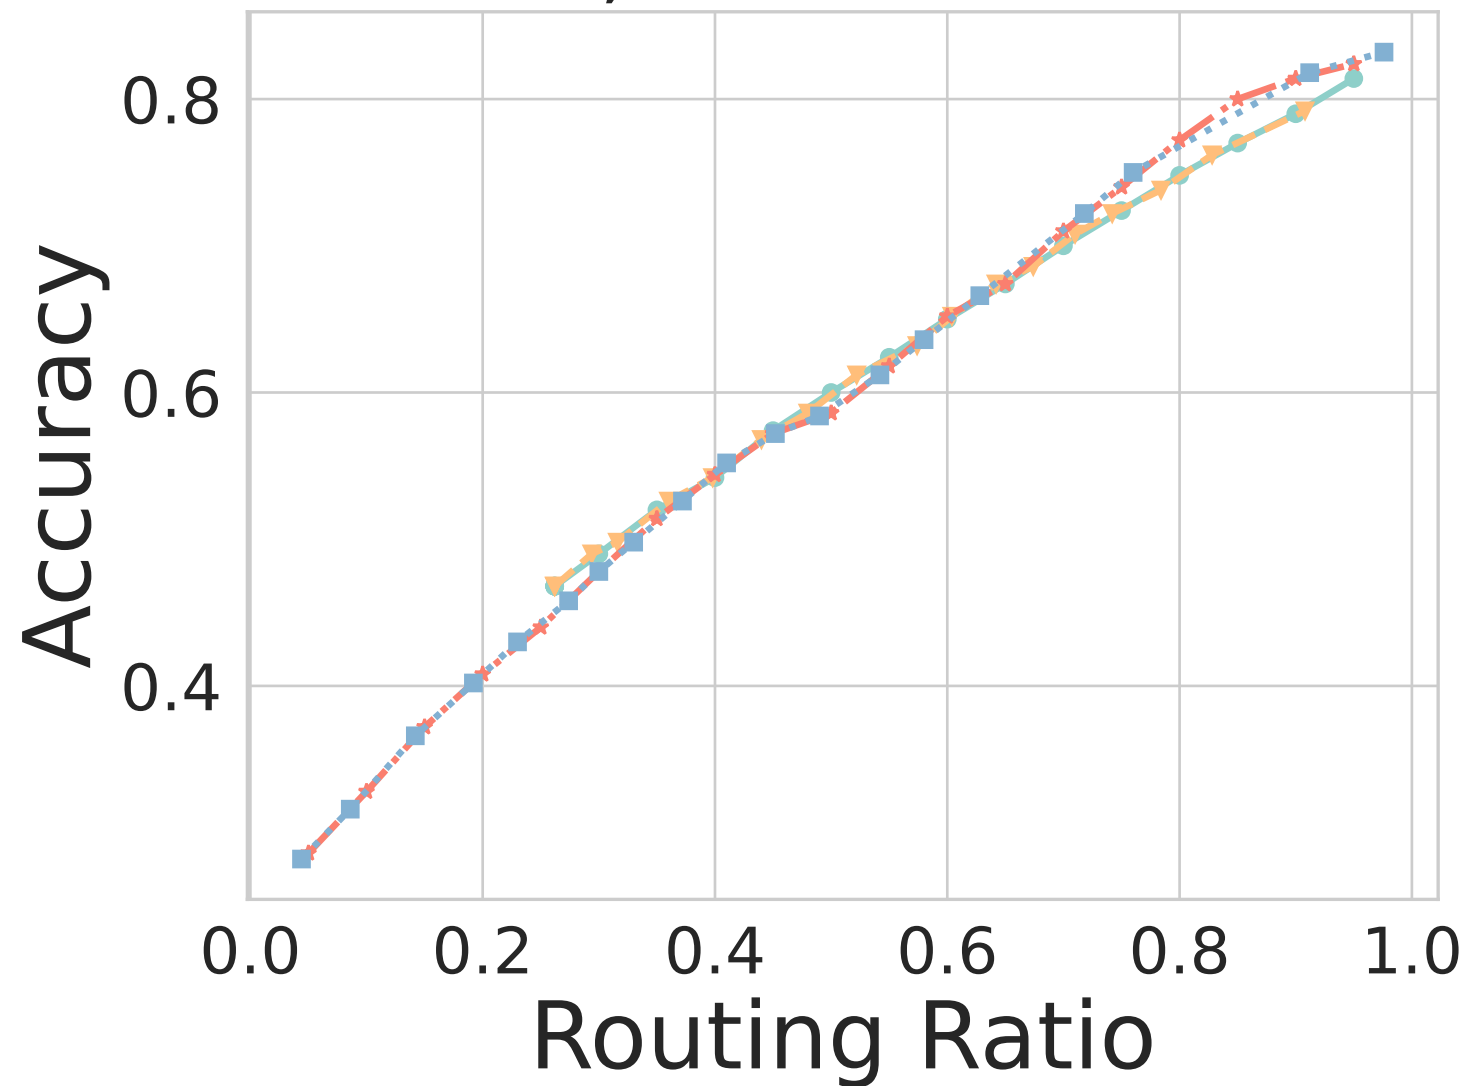

Supplement: supplementary_material [file cali_down_mmlu_rwkv_gpt-4.1-mini.pdf › Routing_SLM_LLMs/Proxy_routing_prediction/to_gpt-4.1-mini/mmlu_as_downstream/cali_down_mmlu_rwkv_gpt-4.1-mini.pdf]

**MultiArith, Qwen3-0.6B to GPT-4.1 mini**

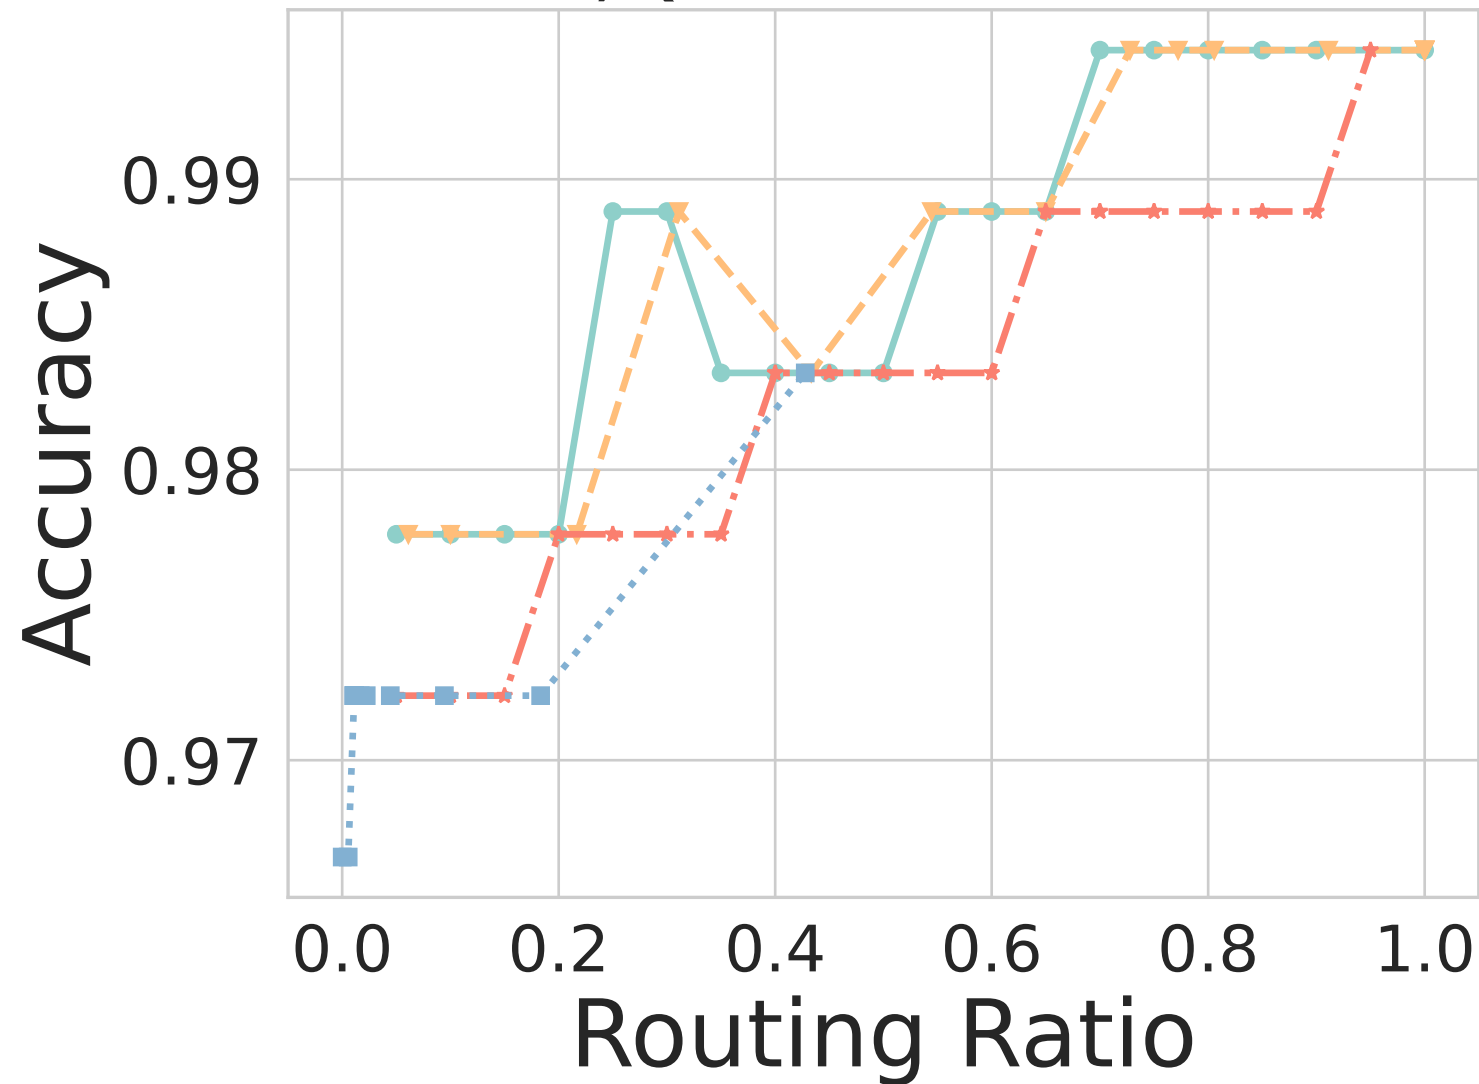

Supplement: supplementary_material [file cali_down_multiarith_Qwen3-0.6B_gpt-4.1-mini.pdf › Routing_SLM_LLMs/Proxy_routing_prediction/to_gpt-4.1-mini/multiarith_as_downstream/cali_down_multiarith_Qwen3-0.6B_gpt-4.1-mini.pdf]

**MultiArith, Qwen3-1.7B to GPT-4.1 mini**

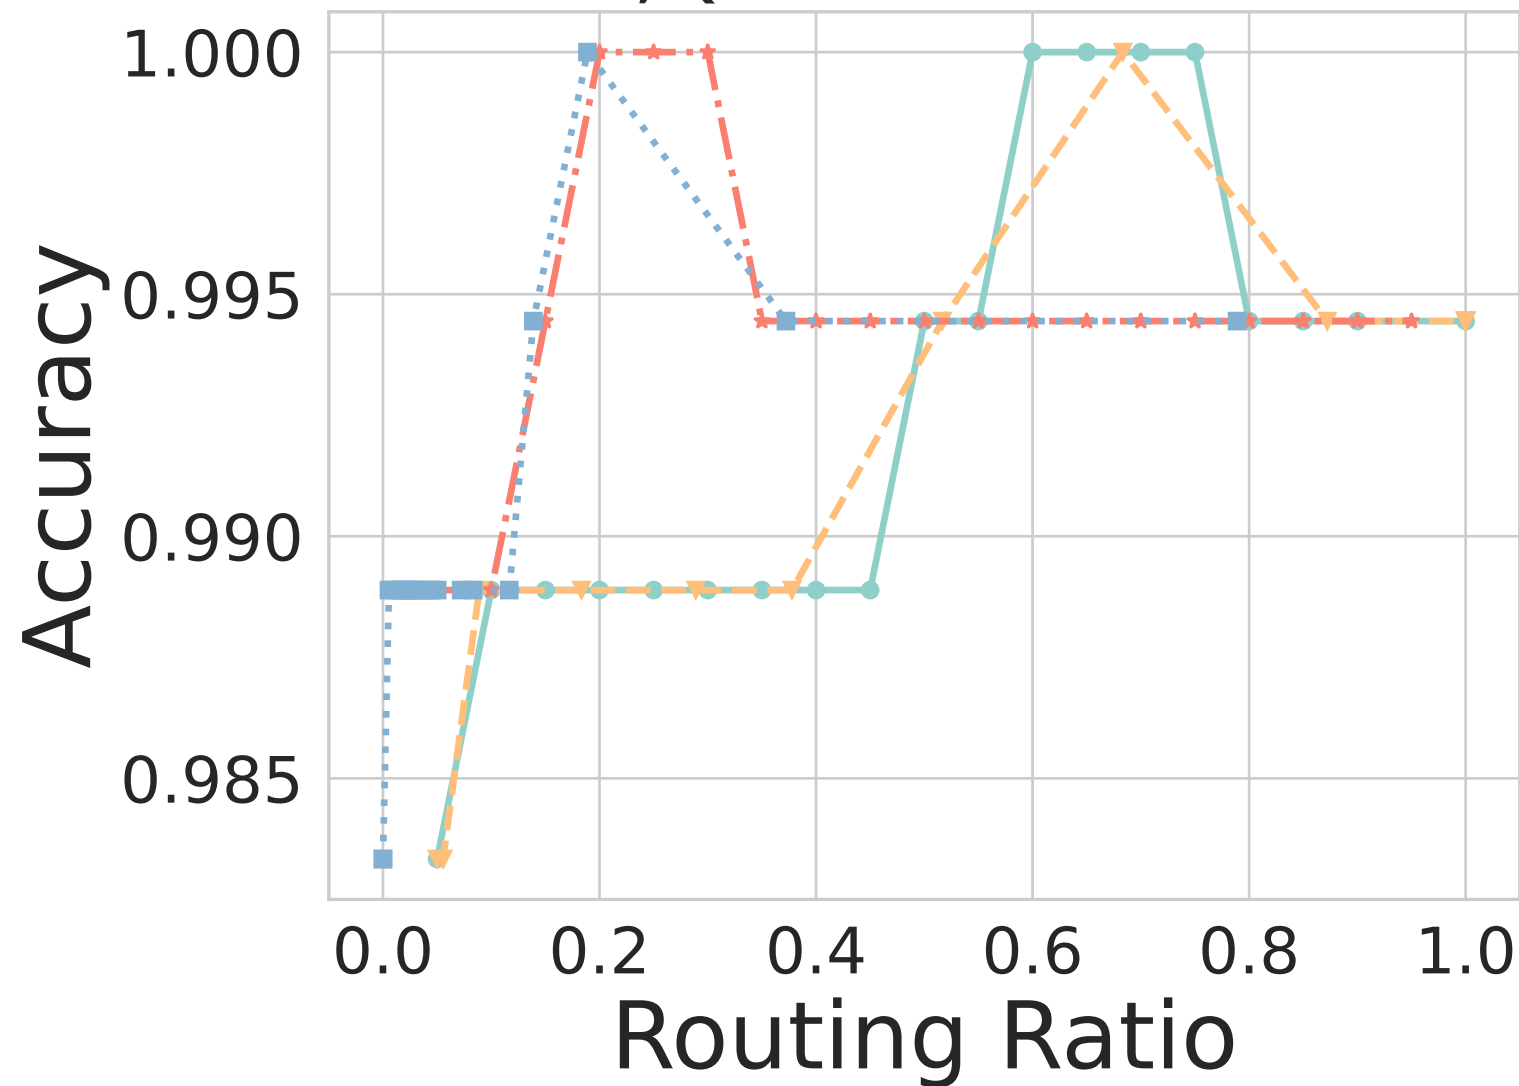

Supplement: supplementary_material [file cali_down_multiarith_Qwen3-1.7B_gpt-4.1-mini.pdf › Routing_SLM_LLMs/Proxy_routing_prediction/to_gpt-4.1-mini/multiarith_as_downstream/cali_down_multiarith_Qwen3-1.7B_gpt-4.1-mini.pdf]

**MultiArith, Qwen3-4B to GPT-4.1 mini**

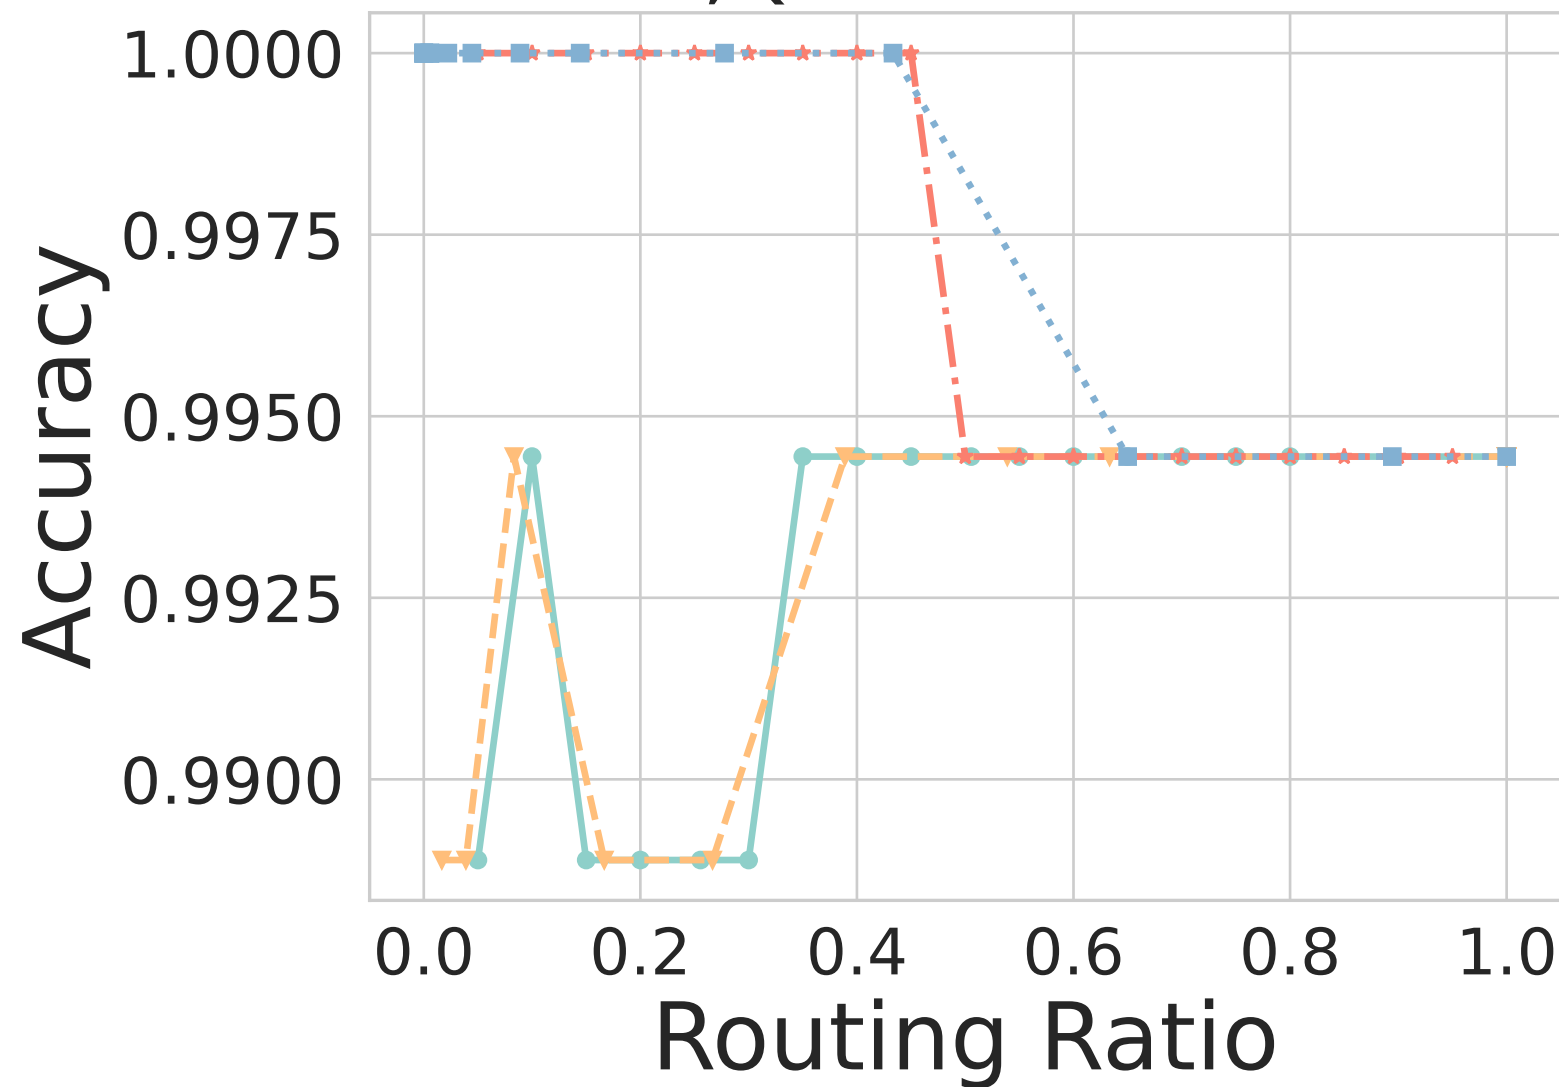

Supplement: supplementary_material [file cali_down_multiarith_Qwen3-4B_gpt-4.1-mini.pdf › Routing_SLM_LLMs/Proxy_routing_prediction/to_gpt-4.1-mini/multiarith_as_downstream/cali_down_multiarith_Qwen3-4B_gpt-4.1-mini.pdf]

**MultiArith, granite-3.1-8b to GPT-4.1 mini**

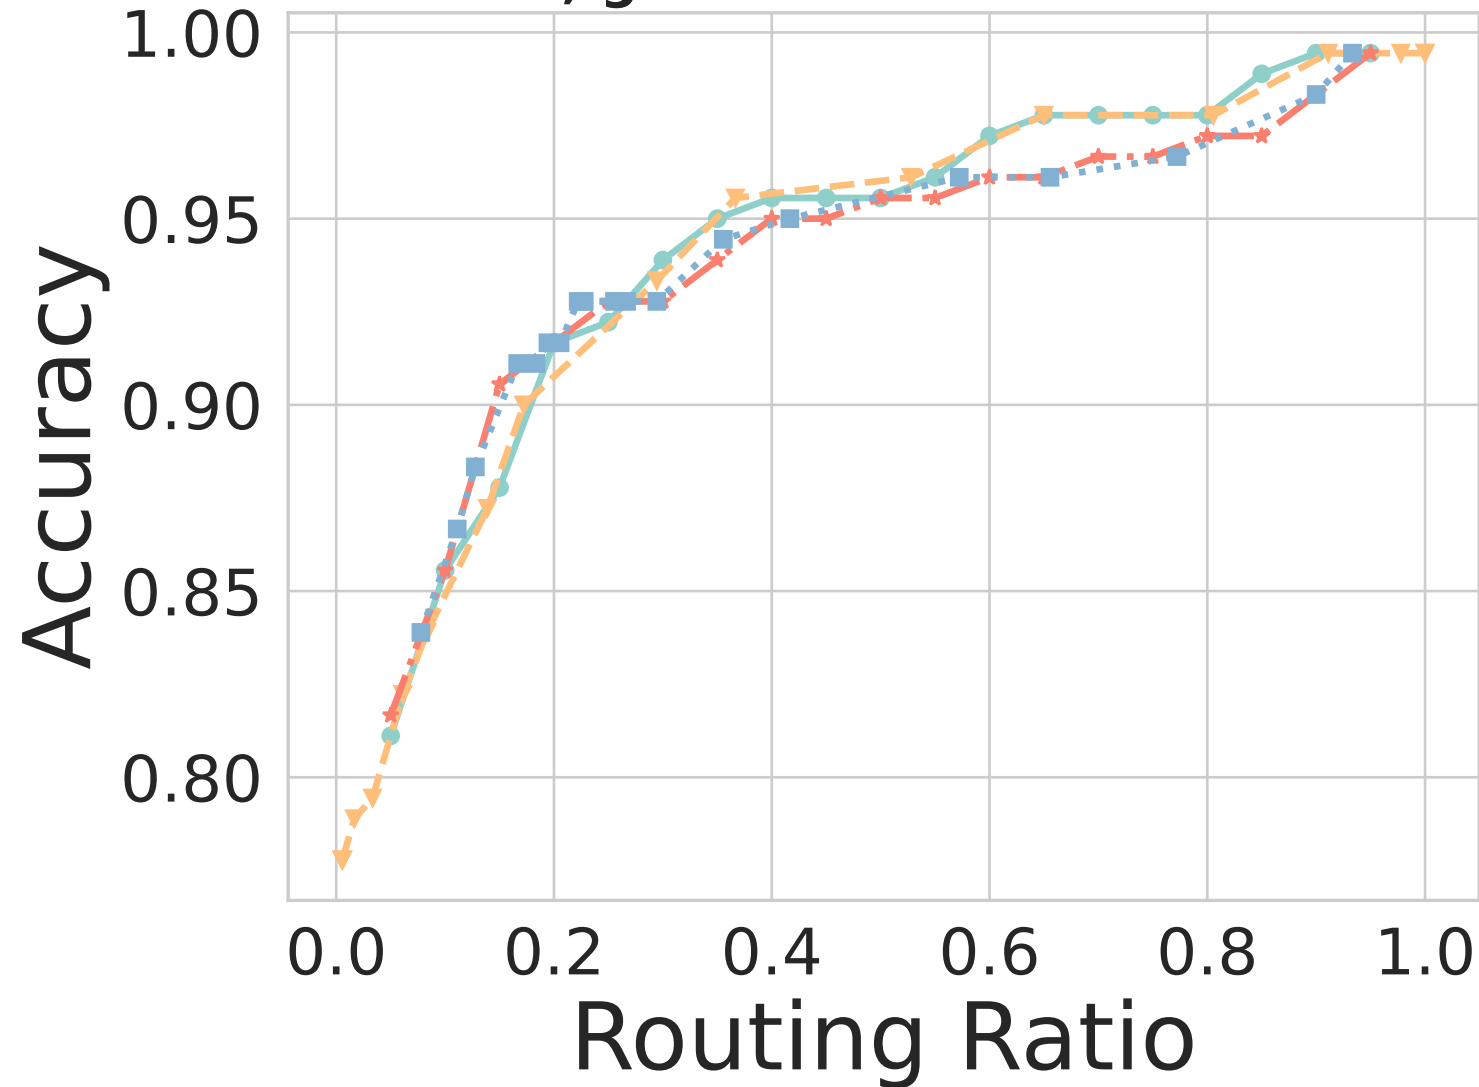

Supplement: supplementary_material [file cali_down_multiarith_granite-3.1-8b_gpt-4.1-mini.pdf › Routing_SLM_LLMs/Proxy_routing_prediction/to_gpt-4.1-mini/multiarith_as_downstream/cali_down_multiarith_granite-3.1-8b_gpt-4.1-mini.pdf]

**MultiArith, llama-3.1-8b to GPT-4.1 mini**

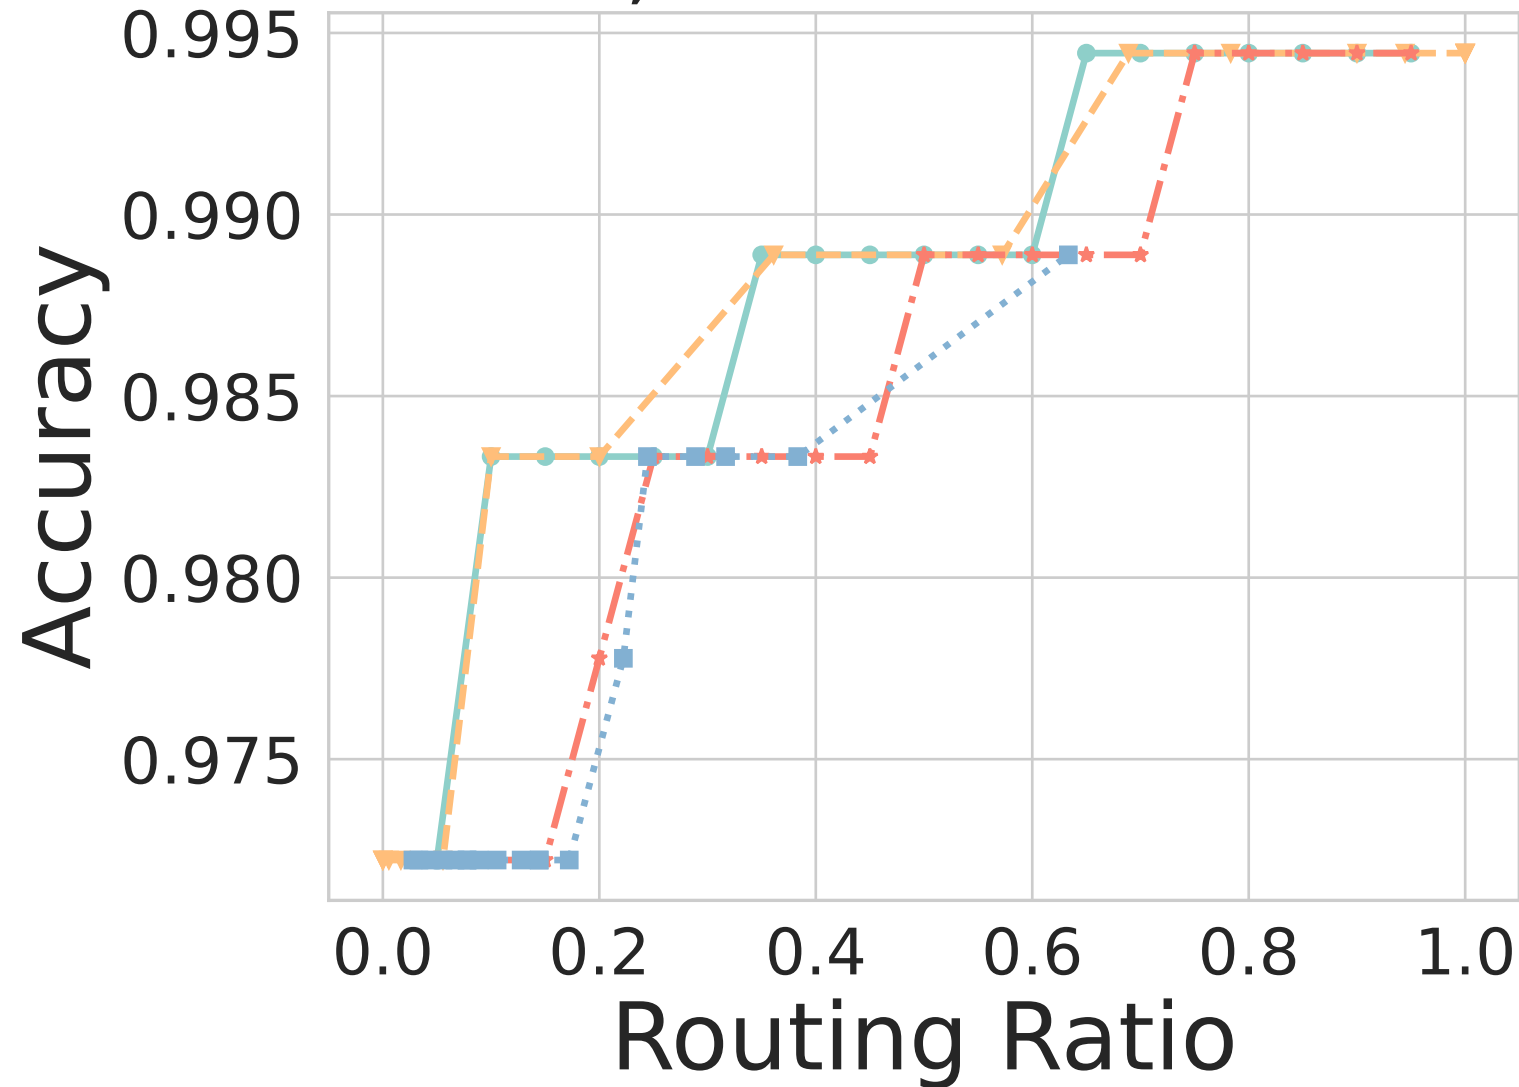

Supplement: supplementary_material [file cali_down_multiarith_llama-3.1-8b_gpt-4.1-mini.pdf › Routing_SLM_LLMs/Proxy_routing_prediction/to_gpt-4.1-mini/multiarith_as_downstream/cali_down_multiarith_llama-3.1-8b_gpt-4.1-mini.pdf]

**MultiArith, llama-3.2-1b to GPT-4.1 mini**

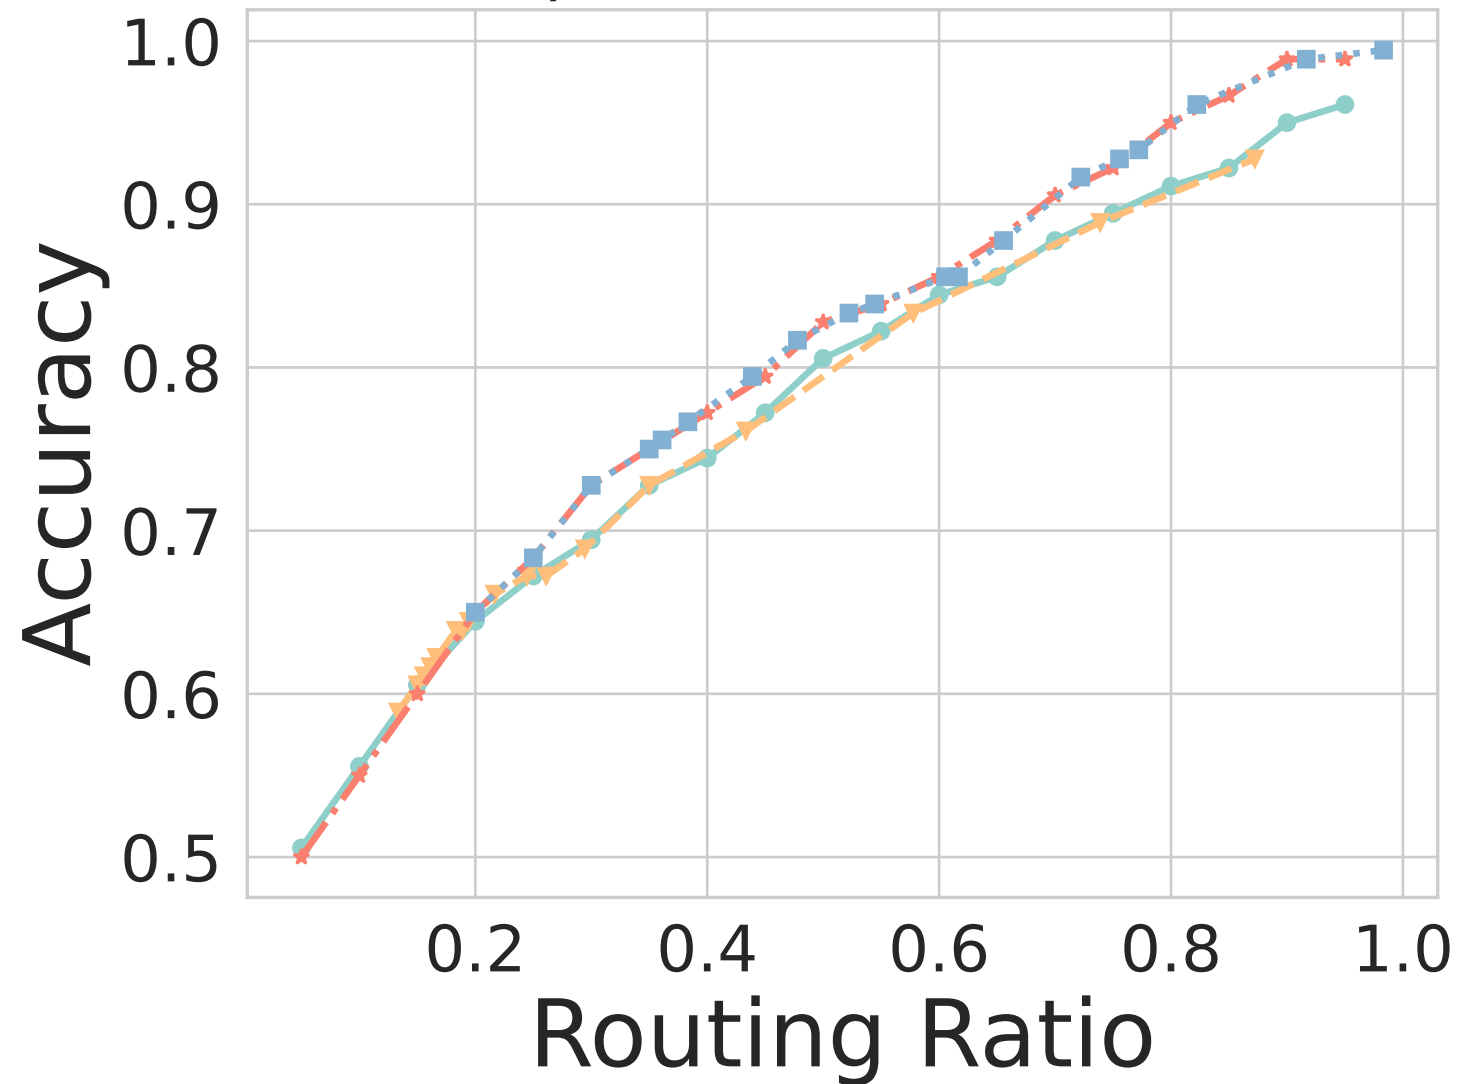

Supplement: supplementary_material [file cali_down_multiarith_llama-3.2-1b_gpt-4.1-mini.pdf › Routing_SLM_LLMs/Proxy_routing_prediction/to_gpt-4.1-mini/multiarith_as_downstream/cali_down_multiarith_llama-3.2-1b_gpt-4.1-mini.pdf]

**MultiArith, llama-3.2-3b to GPT-4.1 mini**

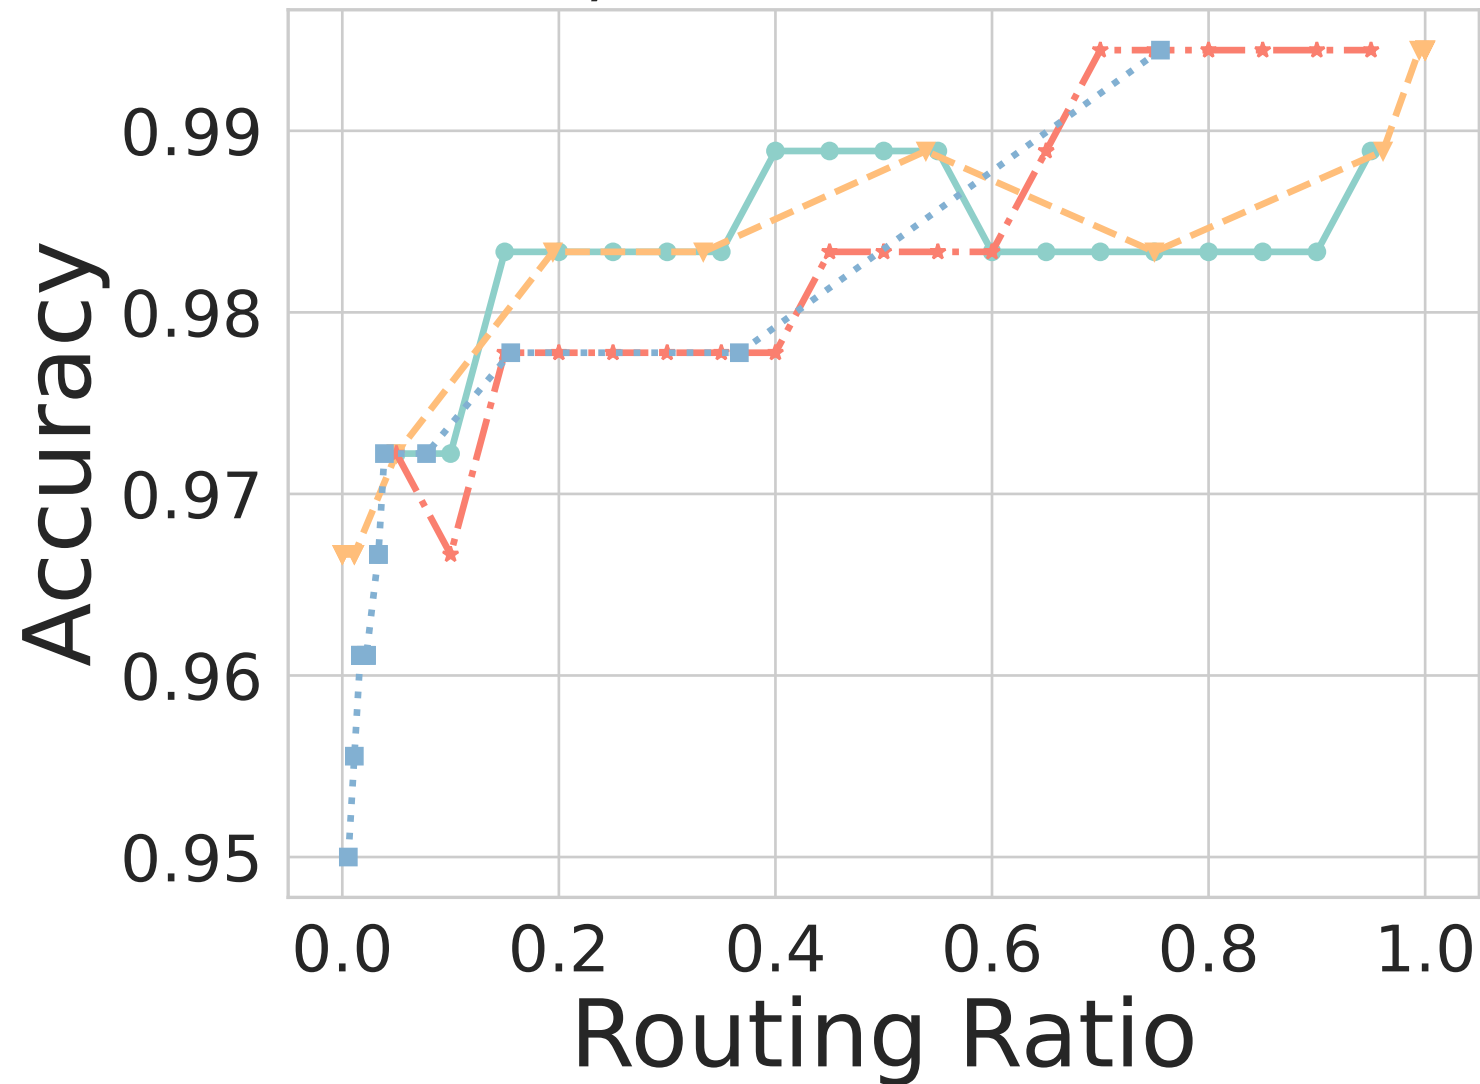

Supplement: supplementary_material [file cali_down_multiarith_llama-3.2-3b_gpt-4.1-mini.pdf › Routing_SLM_LLMs/Proxy_routing_prediction/to_gpt-4.1-mini/multiarith_as_downstream/cali_down_multiarith_llama-3.2-3b_gpt-4.1-mini.pdf]

**MultiArith, mistral-7b to GPT-4.1 mini**

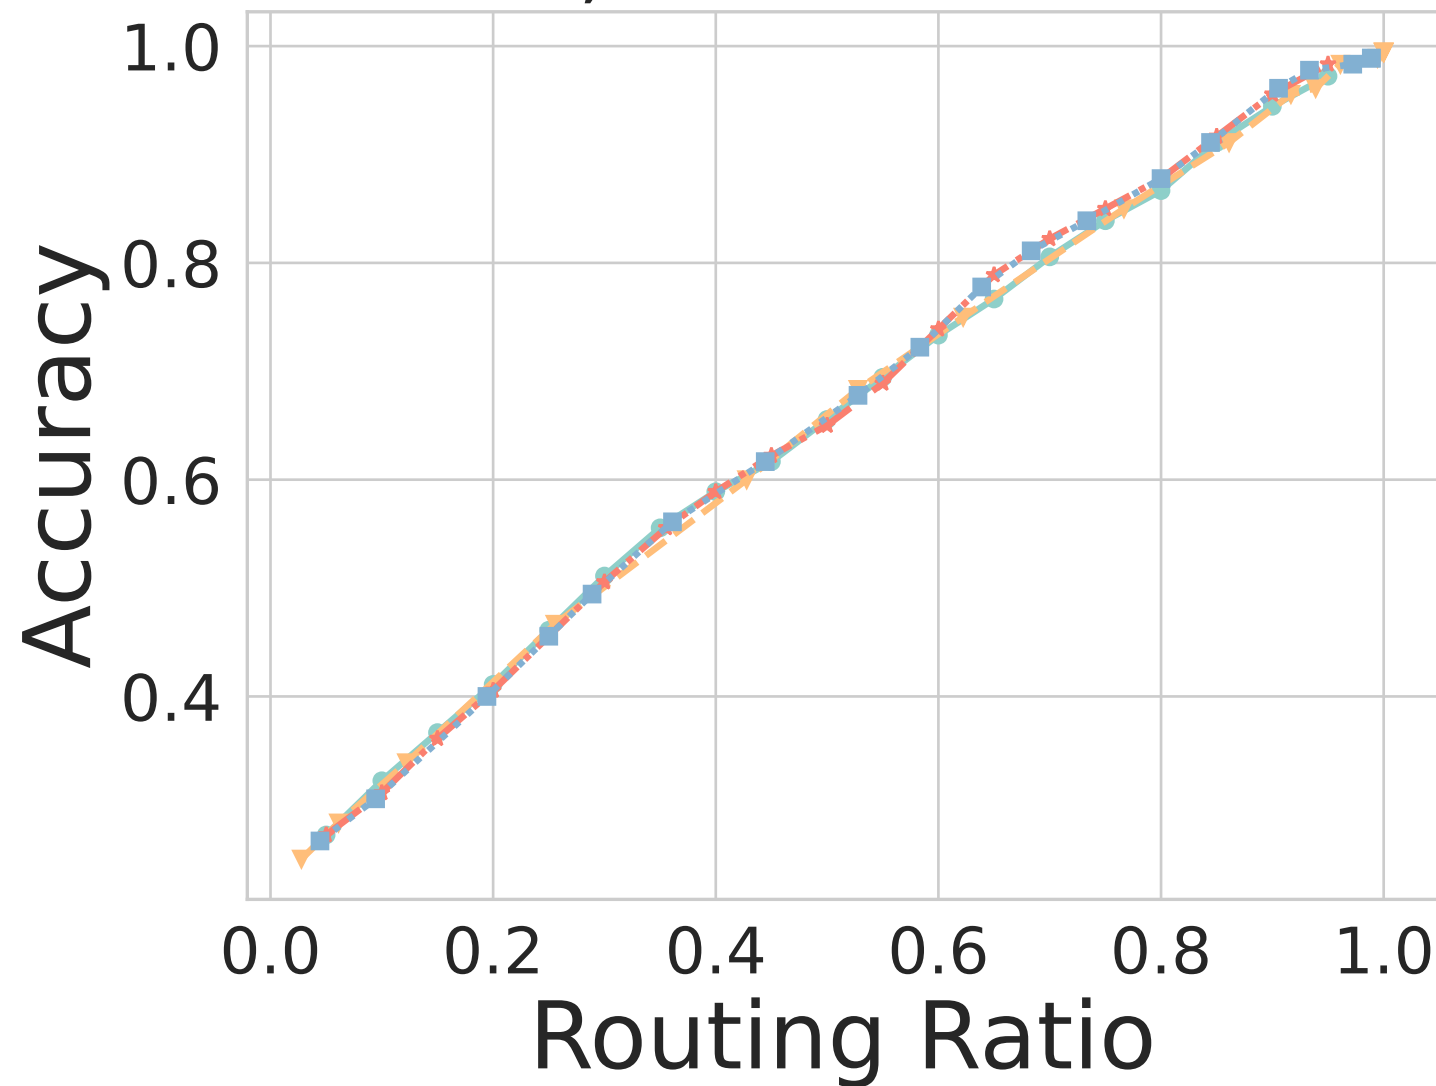

Supplement: supplementary_material [file cali_down_multiarith_mistral-7b_gpt-4.1-mini.pdf › Routing_SLM_LLMs/Proxy_routing_prediction/to_gpt-4.1-mini/multiarith_as_downstream/cali_down_multiarith_mistral-7b_gpt-4.1-mini.pdf]

**MultiArith, phi-3.5-mini to GPT-4.1 mini**

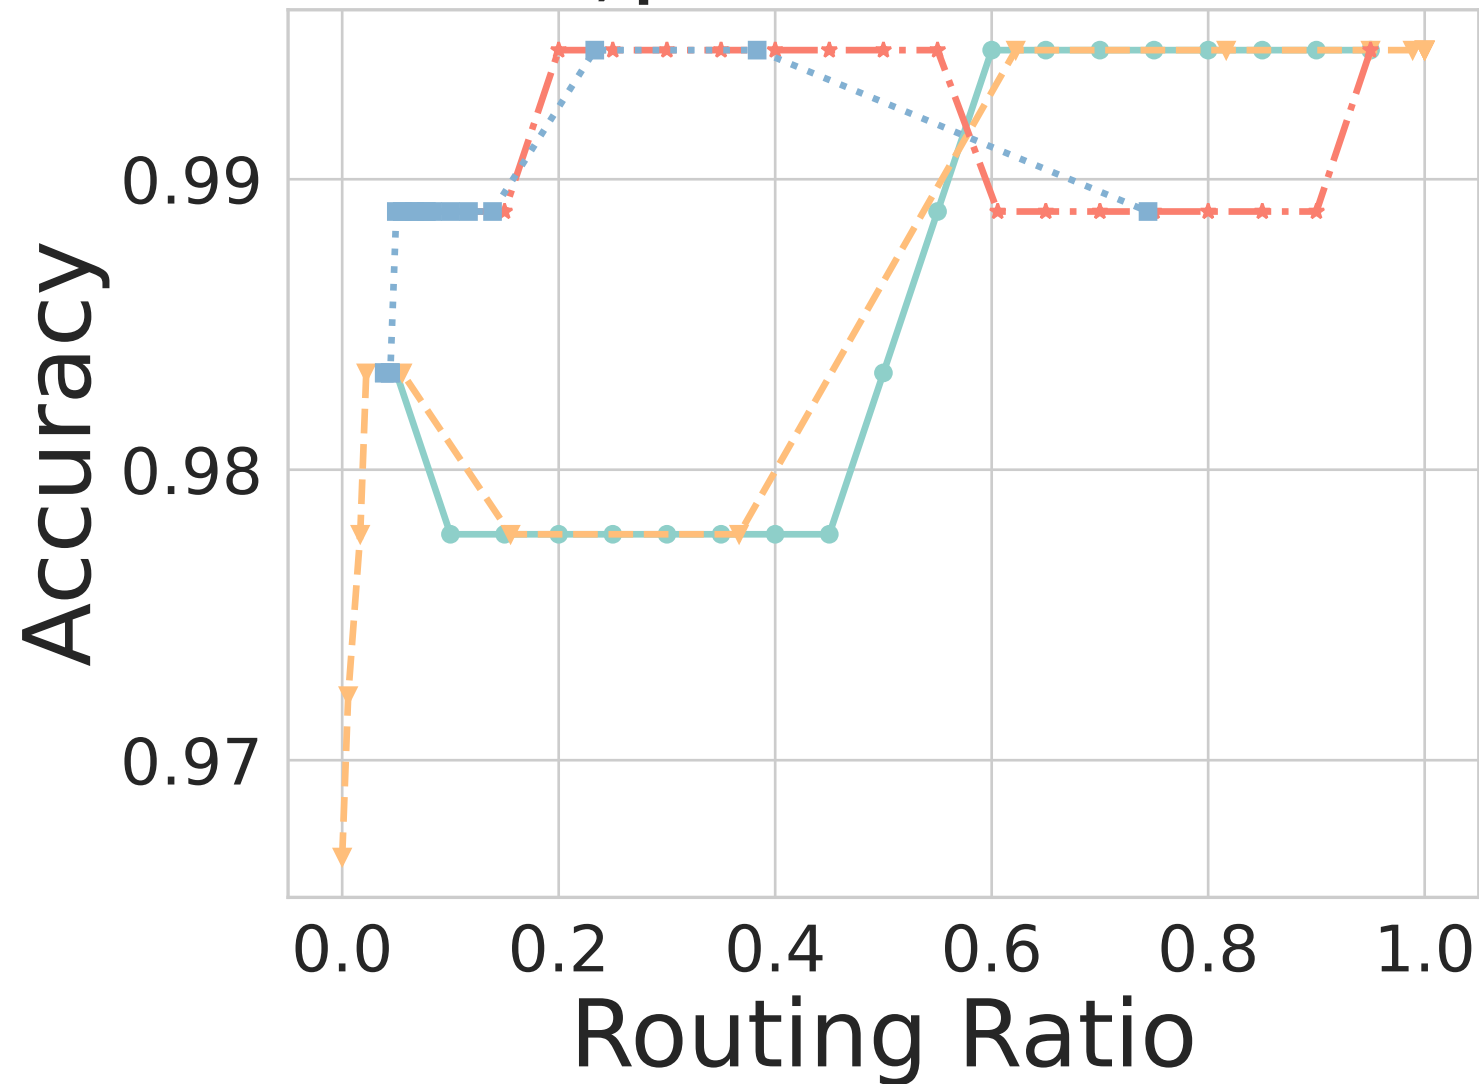

Supplement: supplementary_material [file cali_down_multiarith_phi-3.5-mini_gpt-4.1-mini.pdf › Routing_SLM_LLMs/Proxy_routing_prediction/to_gpt-4.1-mini/multiarith_as_downstream/cali_down_multiarith_phi-3.5-mini_gpt-4.1-mini.pdf]

**MultiArith, phi-4-mini-reasoning to GPT-4.1 mini**

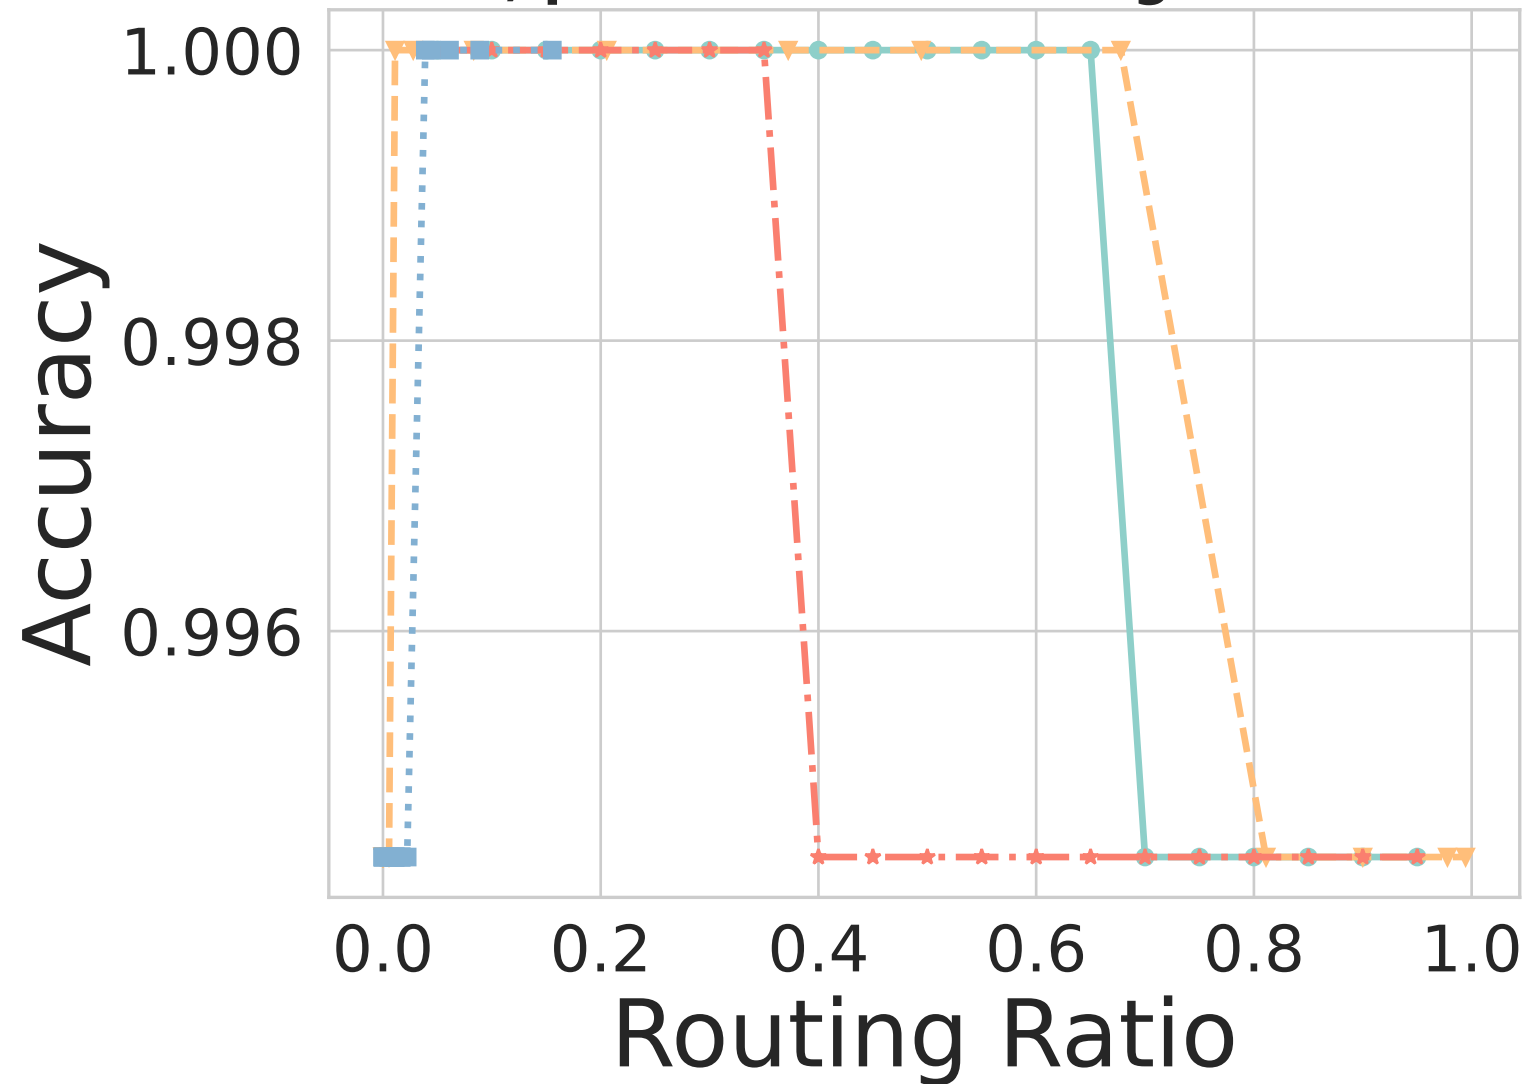

Supplement: supplementary_material [file cali_down_multiarith_phi-4-mini-reasoning_gpt-4.1-mini.pdf › Routing_SLM_LLMs/Proxy_routing_prediction/to_gpt-4.1-mini/multiarith_as_downstream/cali_down_multiarith_phi-4-mini-reasoning_gpt-4.1-mini.pdf]

**MultiArith, qwen-2.5-7b to GPT-4.1 mini**

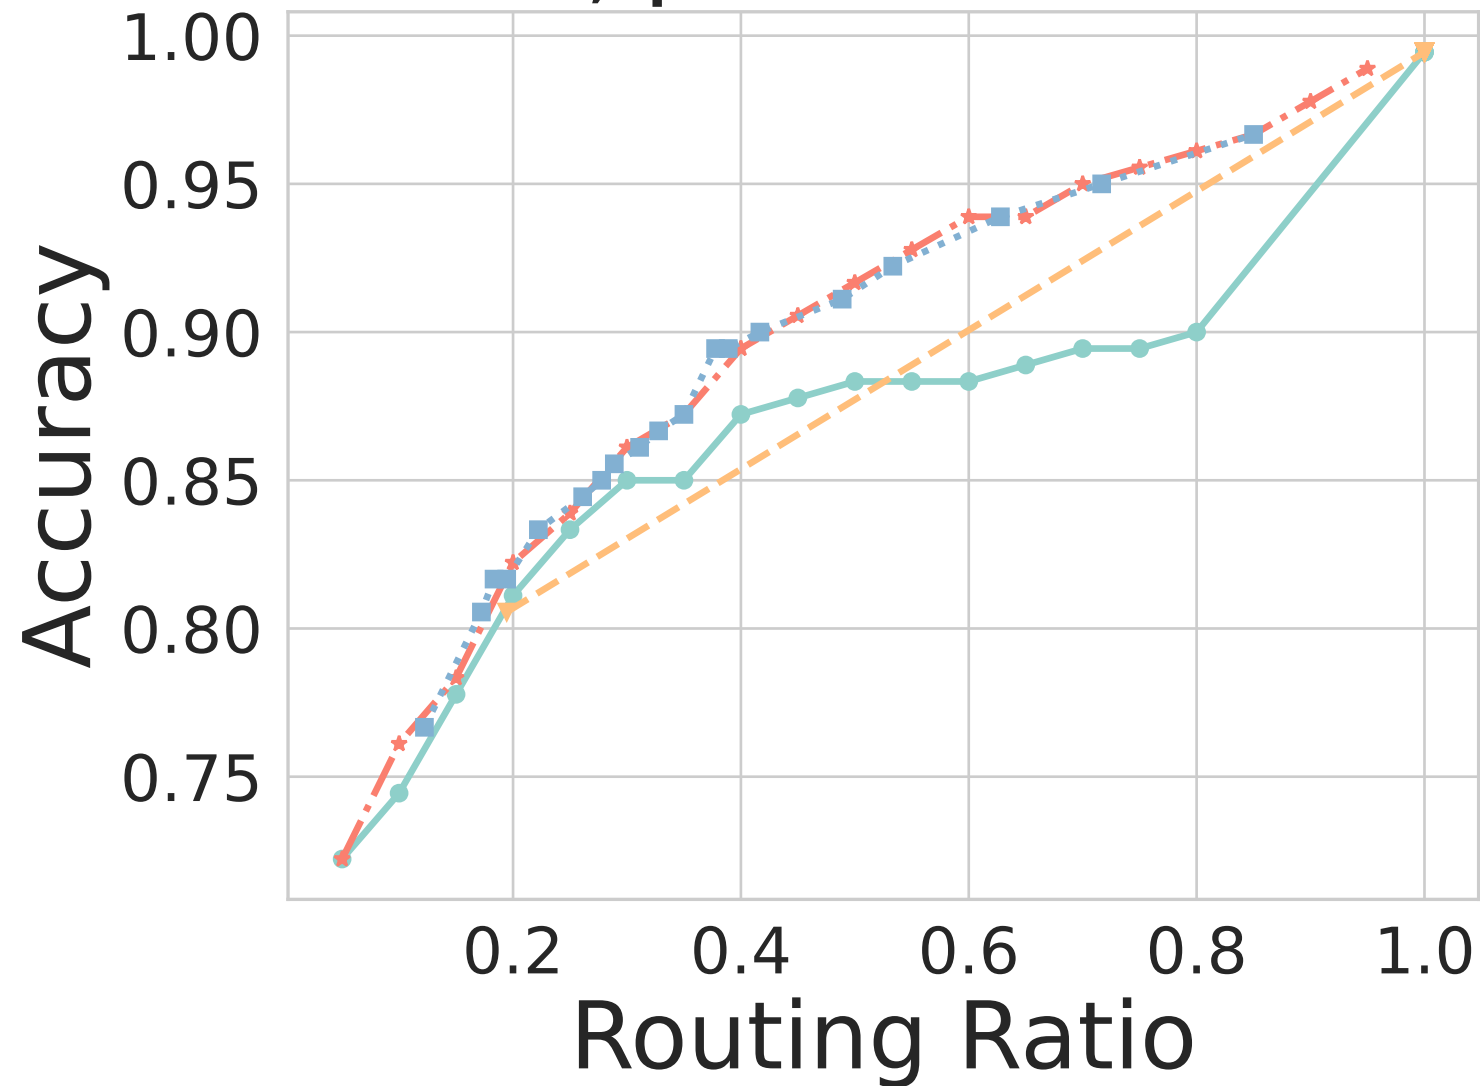

Supplement: supplementary_material [file cali_down_multiarith_qwen-2.5-7b_gpt-4.1-mini.pdf › Routing_SLM_LLMs/Proxy_routing_prediction/to_gpt-4.1-mini/multiarith_as_downstream/cali_down_multiarith_qwen-2.5-7b_gpt-4.1-mini.pdf]

**MultiArith, rwkv to GPT-4.1 mini**

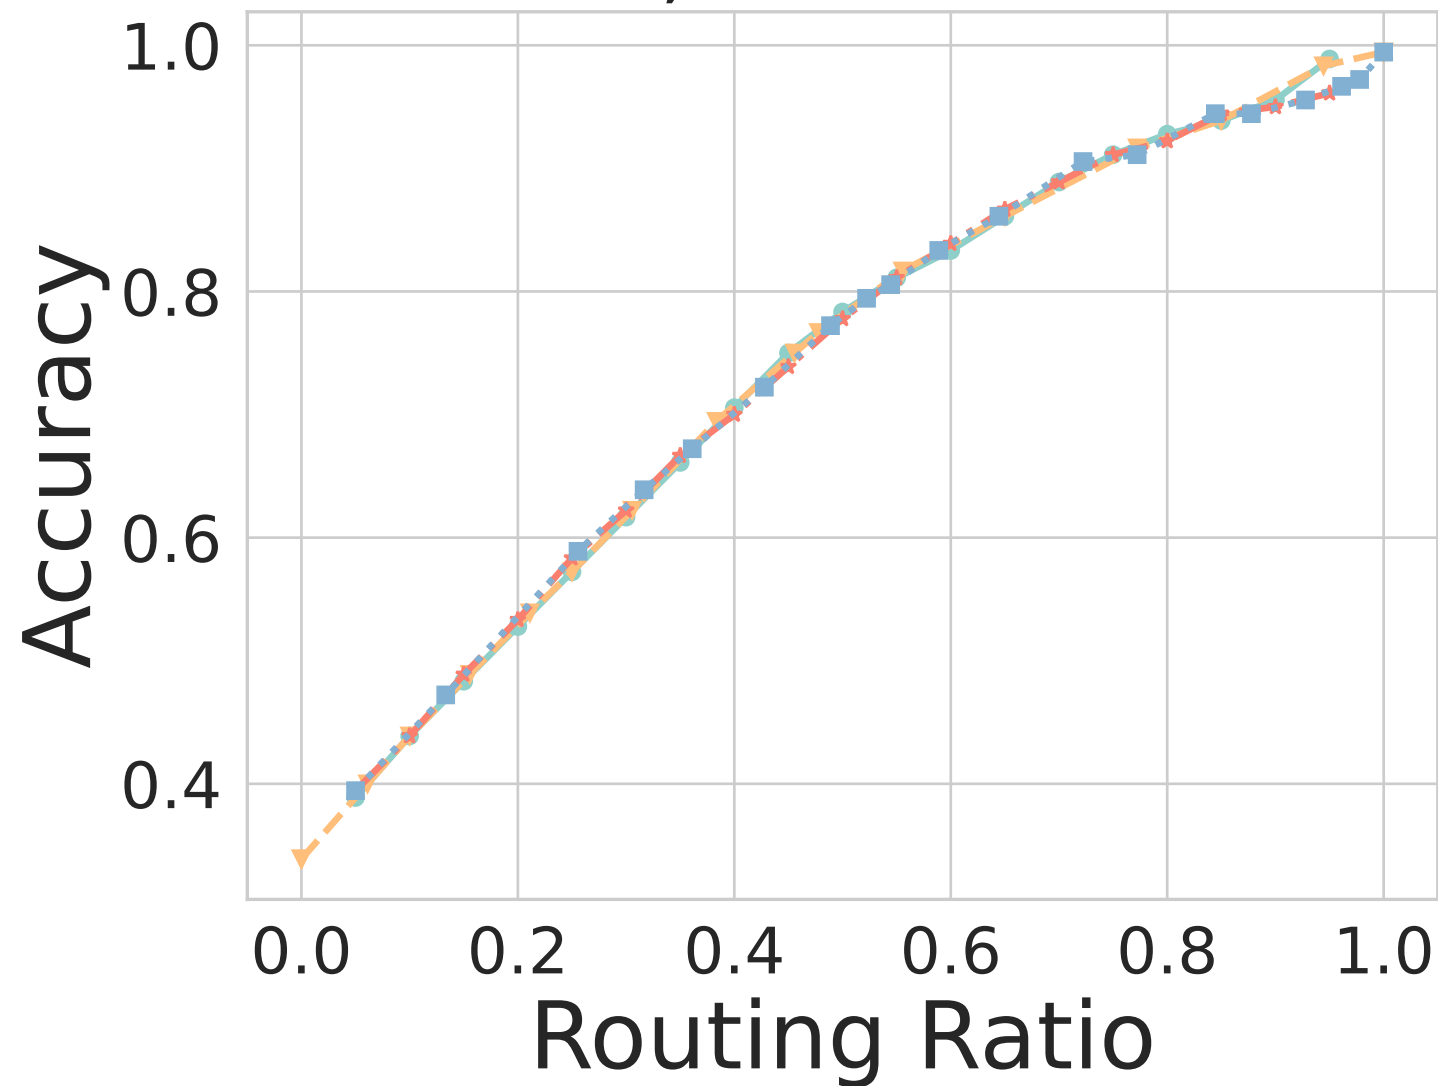

Supplement: supplementary_material [file cali_down_multiarith_rwkv_gpt-4.1-mini.pdf › Routing_SLM_LLMs/Proxy_routing_prediction/to_gpt-4.1-mini/multiarith_as_downstream/cali_down_multiarith_rwkv_gpt-4.1-mini.pdf]

OpenBookQA, Qwen3-0.6B to GPT-4.1 mini

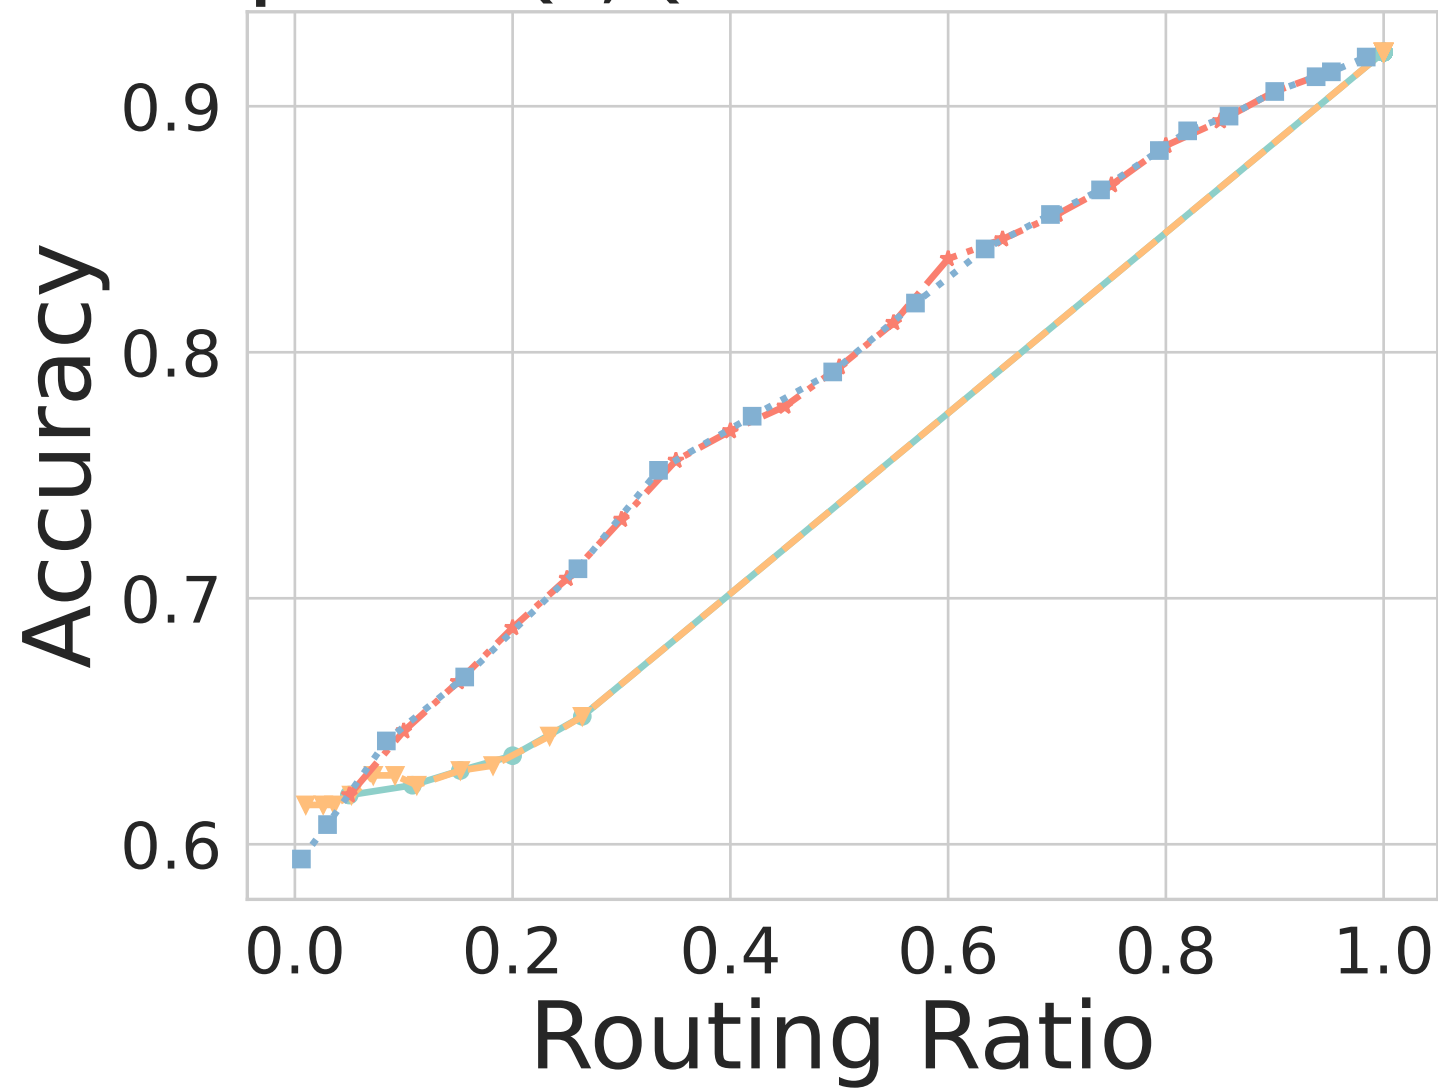

Supplement: supplementary_material [file cali_down_openbook_qa_Qwen3-0.6B_gpt-4.1-mini.pdf › Routing_SLM_LLMs/Proxy_routing_prediction/to_gpt-4.1-mini/openbook_qa_as_downstream/cali_down_openbook_qa_Qwen3-0.6B_gpt-4.1-mini.pdf]

OpenBookQA, Qwen3-1.7B to GPT-4.1 mini

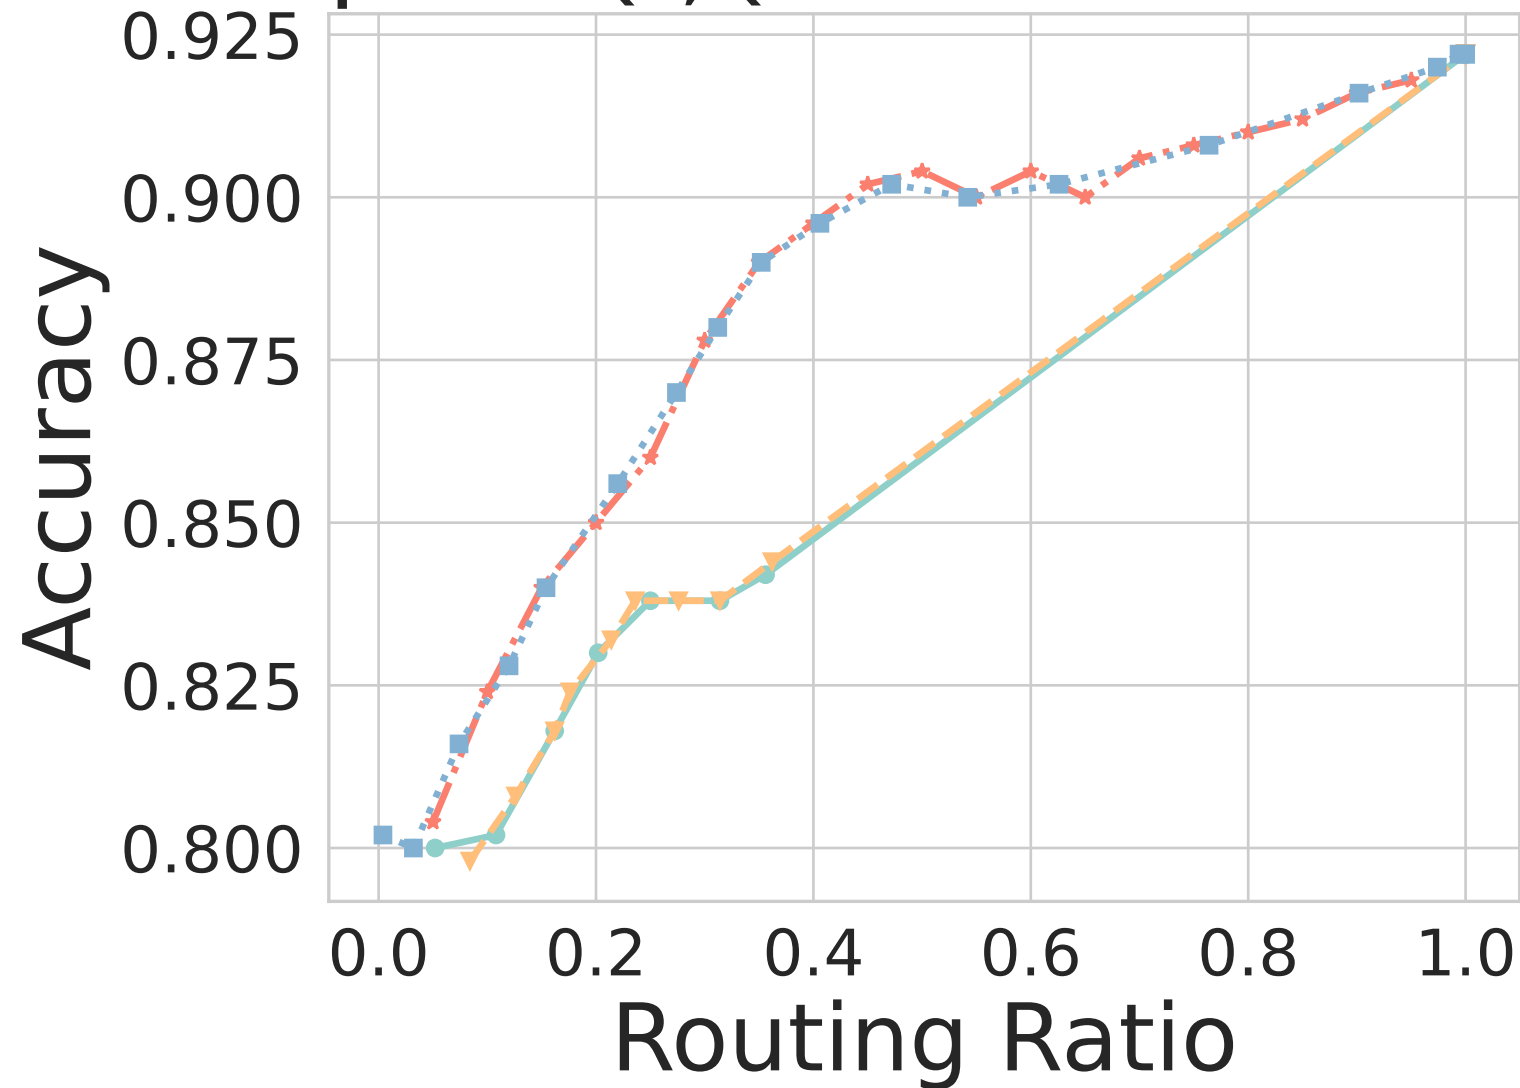

Supplement: supplementary_material [file cali_down_openbook_qa_Qwen3-1.7B_gpt-4.1-mini.pdf › Routing_SLM_LLMs/Proxy_routing_prediction/to_gpt-4.1-mini/openbook_qa_as_downstream/cali_down_openbook_qa_Qwen3-1.7B_gpt-4.1-mini.pdf]

OpenBookQA, Qwen3-4B to GPT-4.1 mini

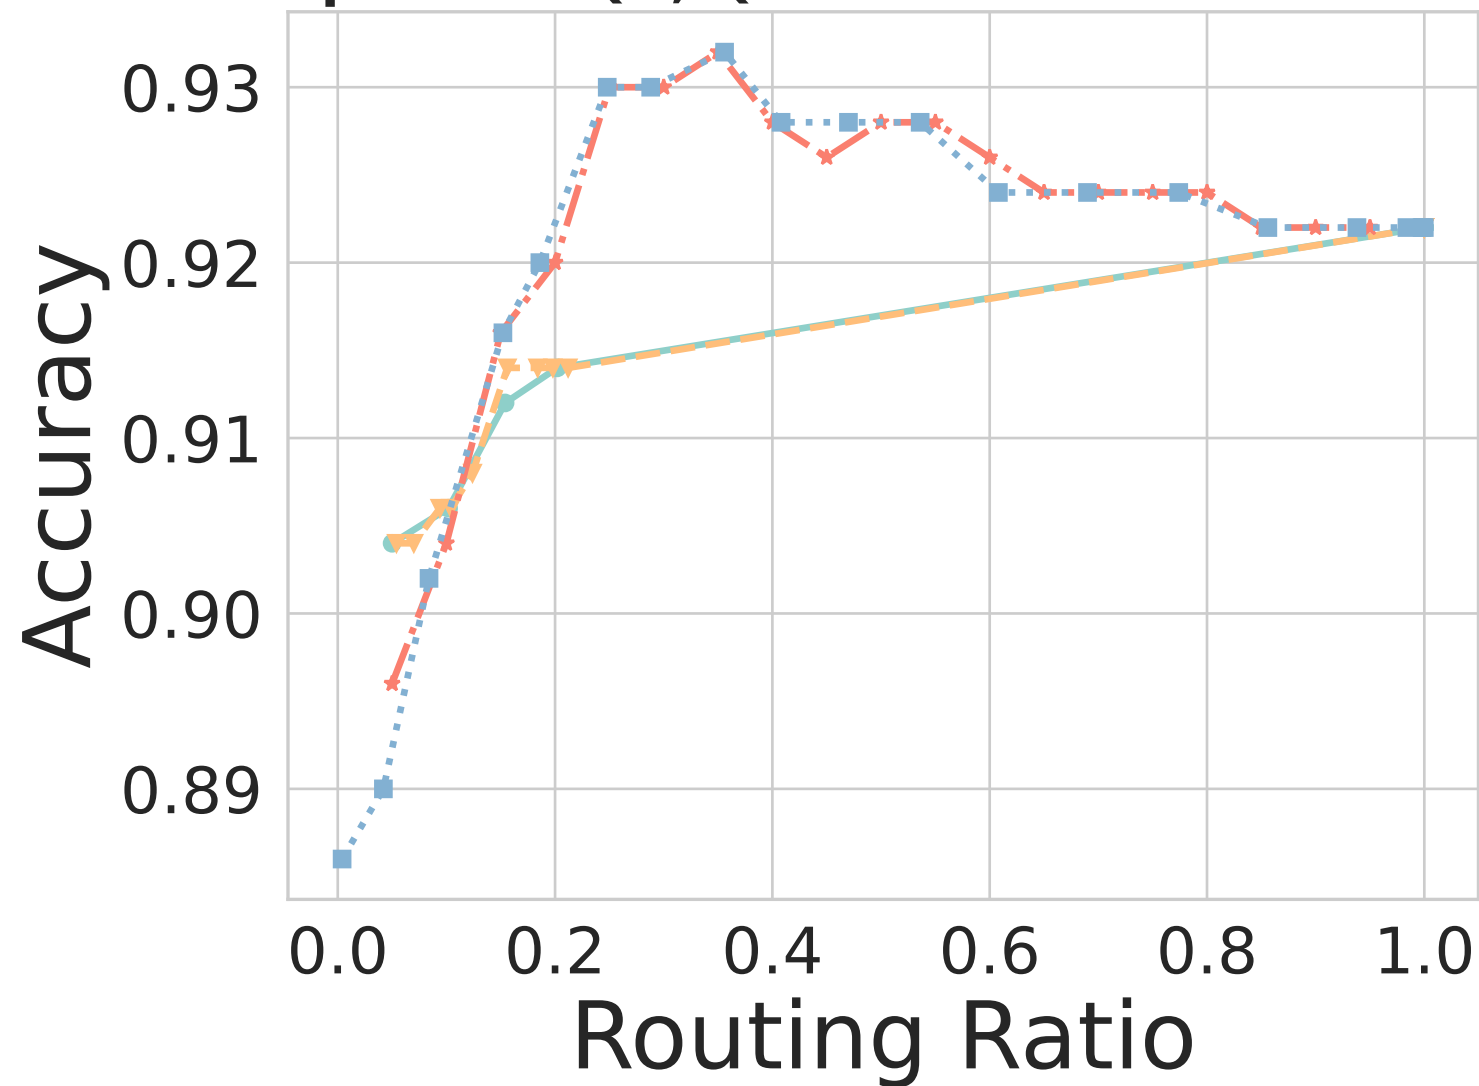

Supplement: supplementary_material [file cali_down_openbook_qa_Qwen3-4B_gpt-4.1-mini.pdf › Routing_SLM_LLMs/Proxy_routing_prediction/to_gpt-4.1-mini/openbook_qa_as_downstream/cali_down_openbook_qa_Qwen3-4B_gpt-4.1-mini.pdf]

# OpenBookQA, granite-3.1-8b to GPT-4.1 mini

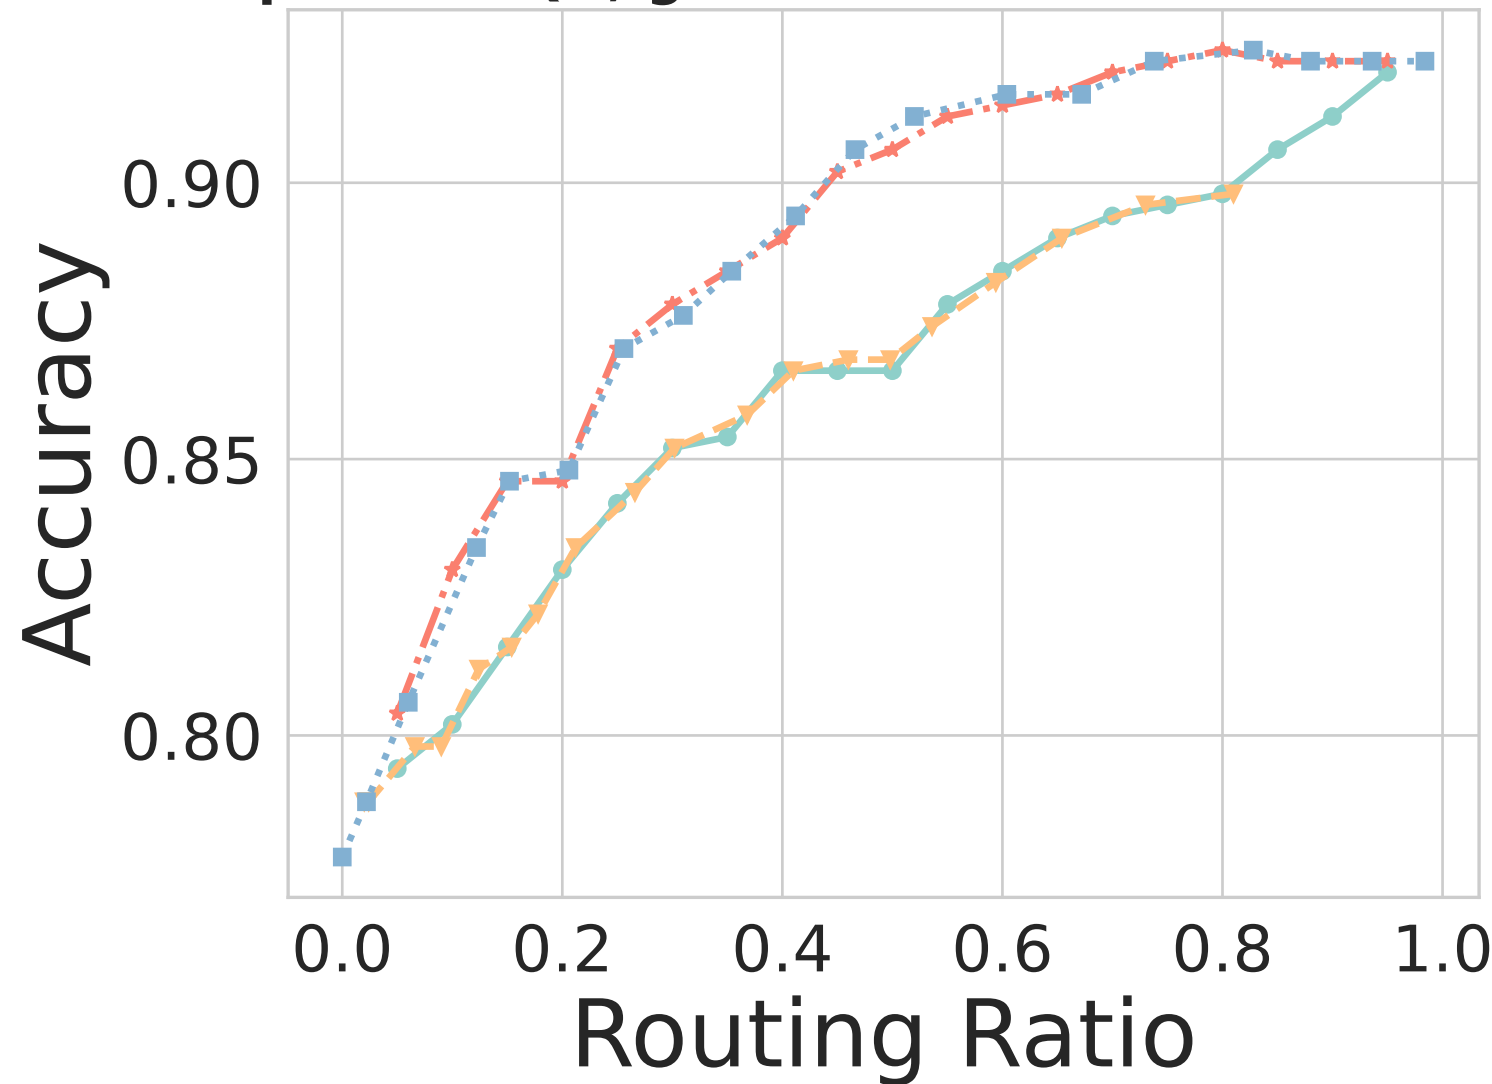

Supplement: supplementary_material [file cali_down_openbook_qa_granite-3.1-8b_gpt-4.1-mini.pdf › Routing_SLM_LLMs/Proxy_routing_prediction/to_gpt-4.1-mini/openbook_qa_as_downstream/cali_down_openbook_qa_granite-3.1-8b_gpt-4.1-mini.pdf]

**OpenBookQA, llama-3.1-8b to GPT-4.1 mini**

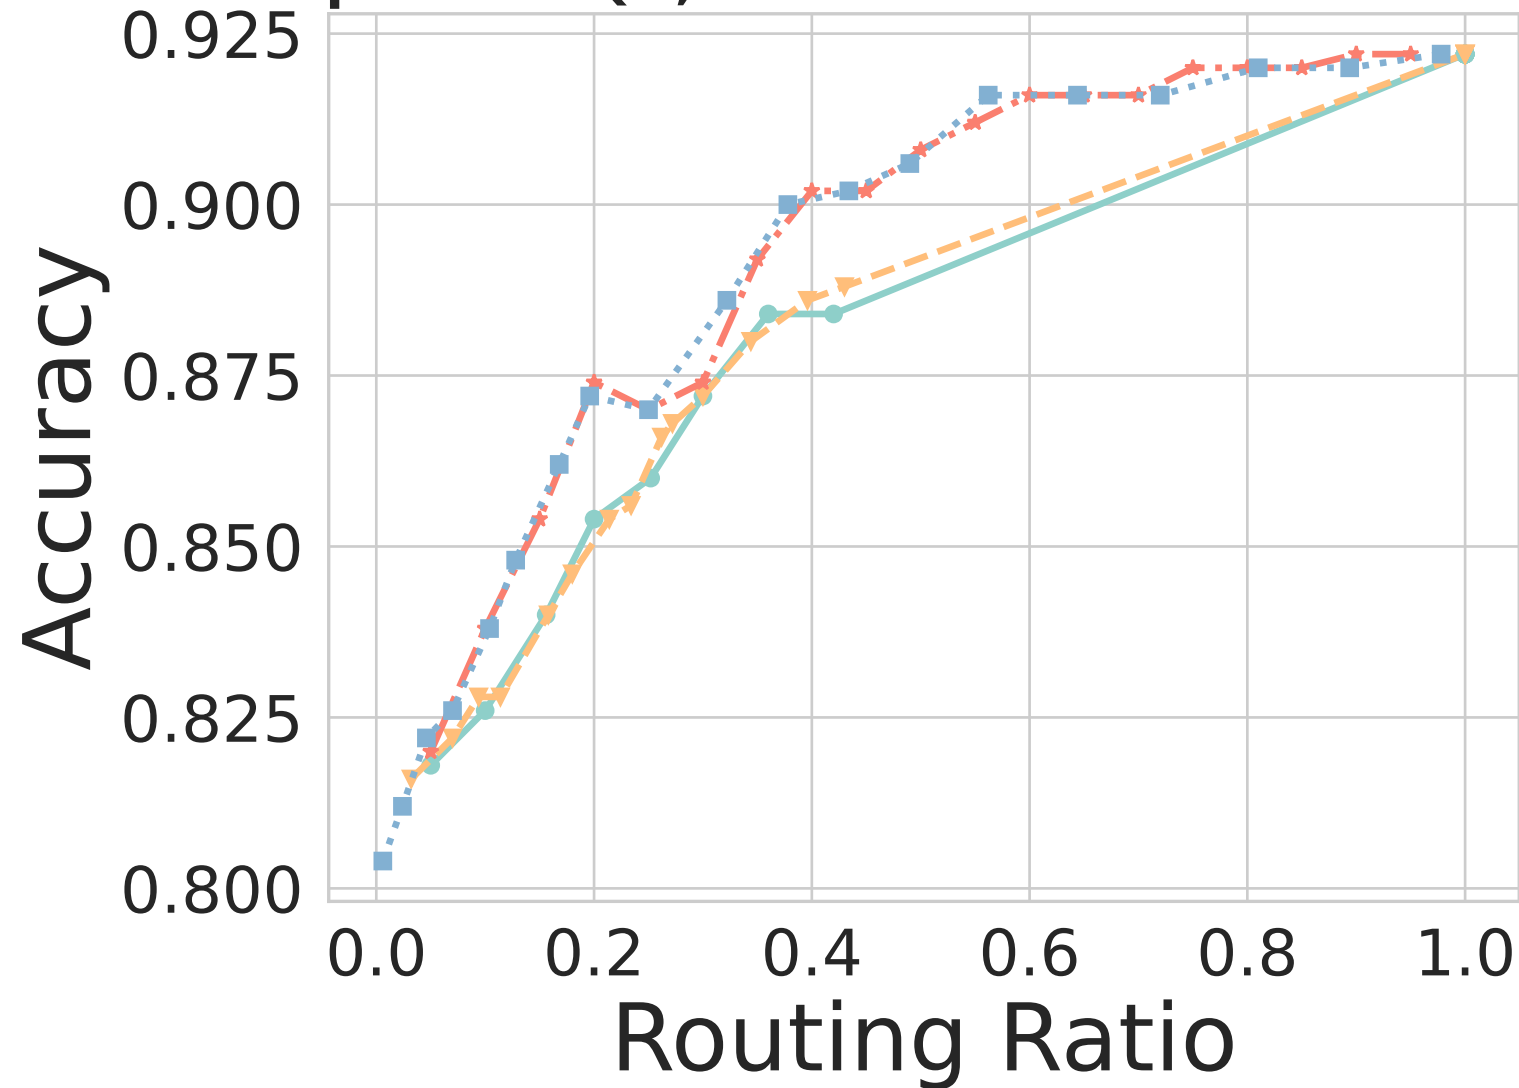

Supplement: supplementary_material [file cali_down_openbook_qa_llama-3.1-8b_gpt-4.1-mini.pdf › Routing_SLM_LLMs/Proxy_routing_prediction/to_gpt-4.1-mini/openbook_qa_as_downstream/cali_down_openbook_qa_llama-3.1-8b_gpt-4.1-mini.pdf]

OpenBookQA, llama-3.2-1b to GPT-4.1 mini

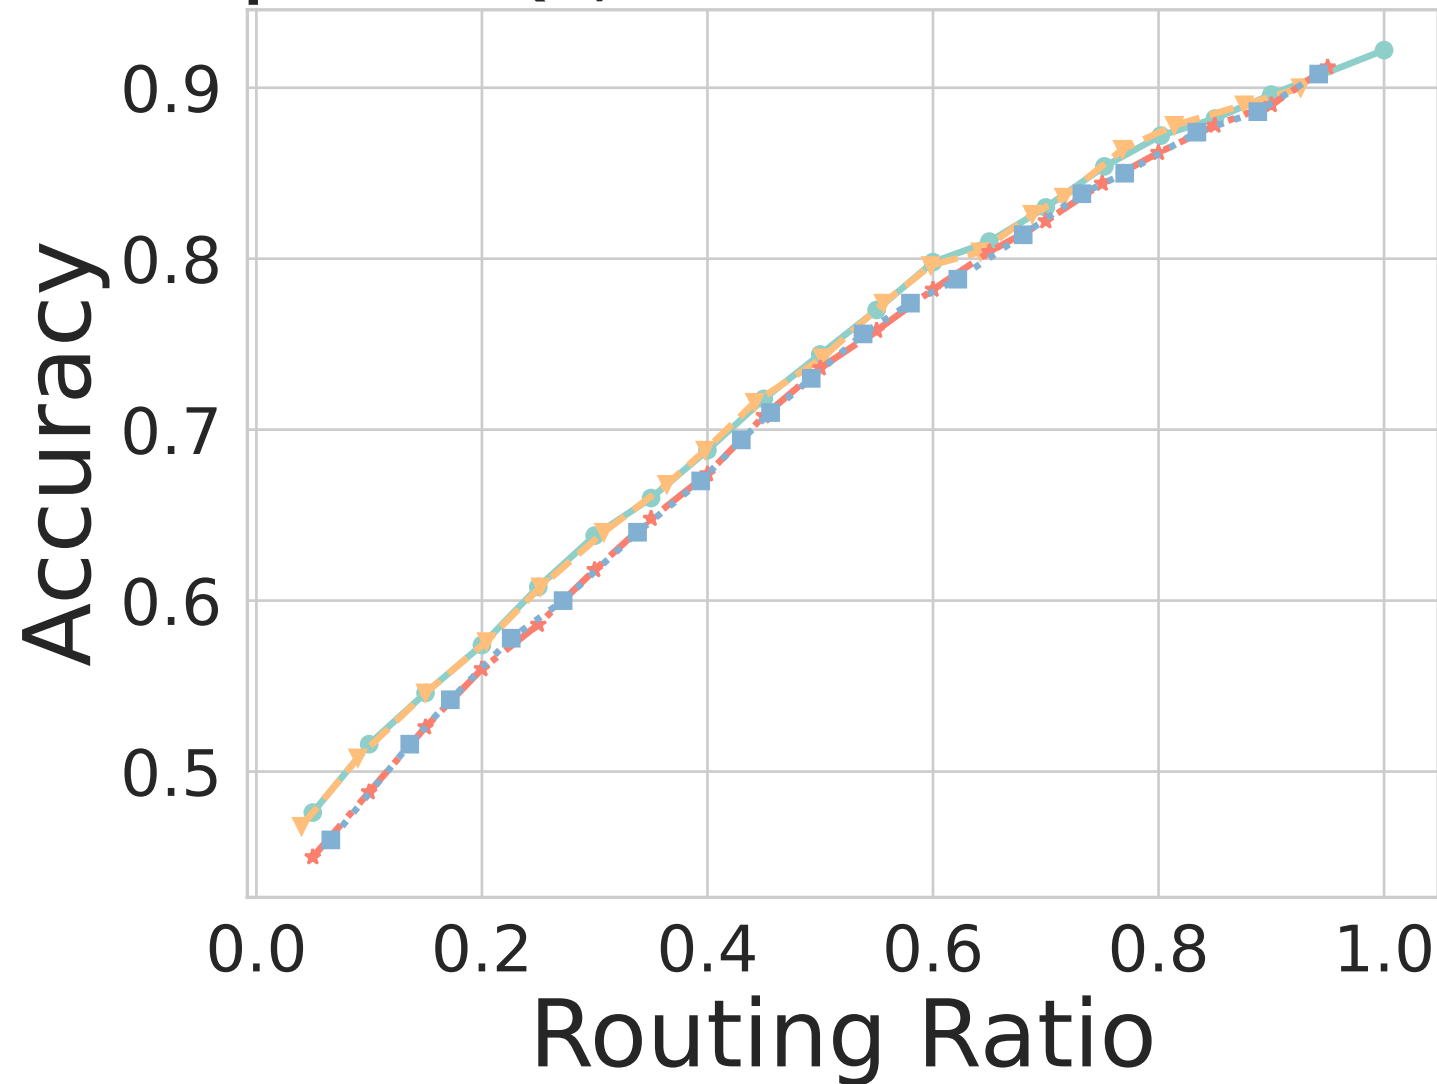

Supplement: supplementary_material [file cali_down_openbook_qa_llama-3.2-1b_gpt-4.1-mini.pdf › Routing_SLM_LLMs/Proxy_routing_prediction/to_gpt-4.1-mini/openbook_qa_as_downstream/cali_down_openbook_qa_llama-3.2-1b_gpt-4.1-mini.pdf]

OpenBookQA, llama-3.2-3b to GPT-4.1 mini

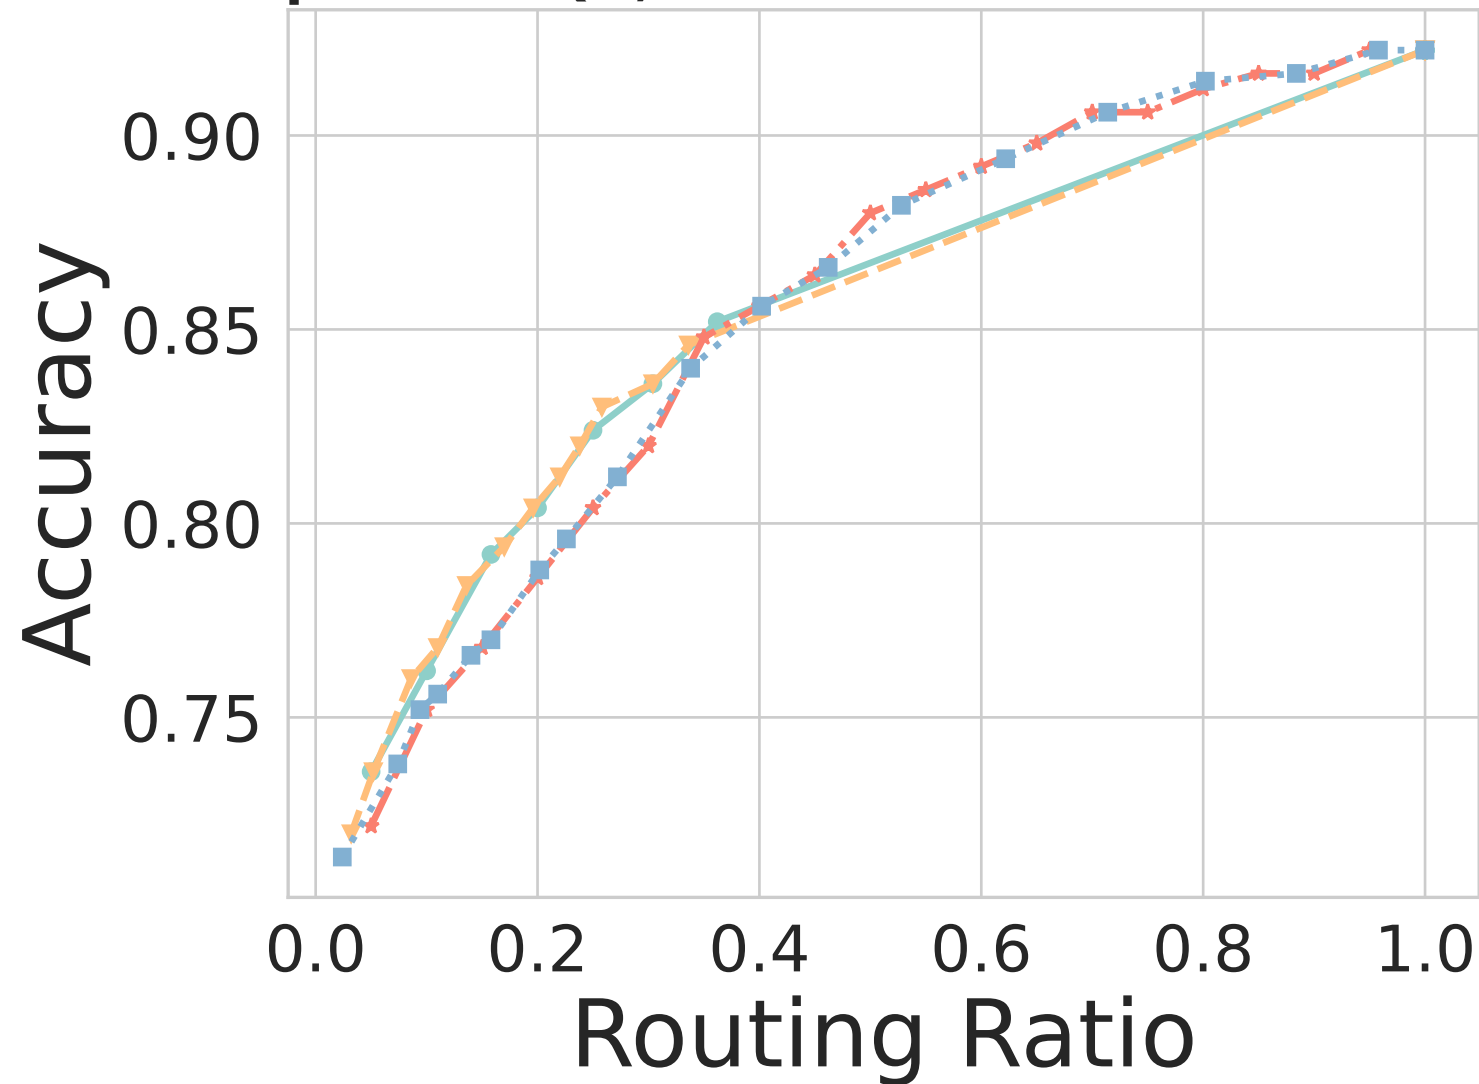

Supplement: supplementary_material [file cali_down_openbook_qa_llama-3.2-3b_gpt-4.1-mini.pdf › Routing_SLM_LLMs/Proxy_routing_prediction/to_gpt-4.1-mini/openbook_qa_as_downstream/cali_down_openbook_qa_llama-3.2-3b_gpt-4.1-mini.pdf]

OpenBookQA, mistral-7b to GPT-4.1 mini

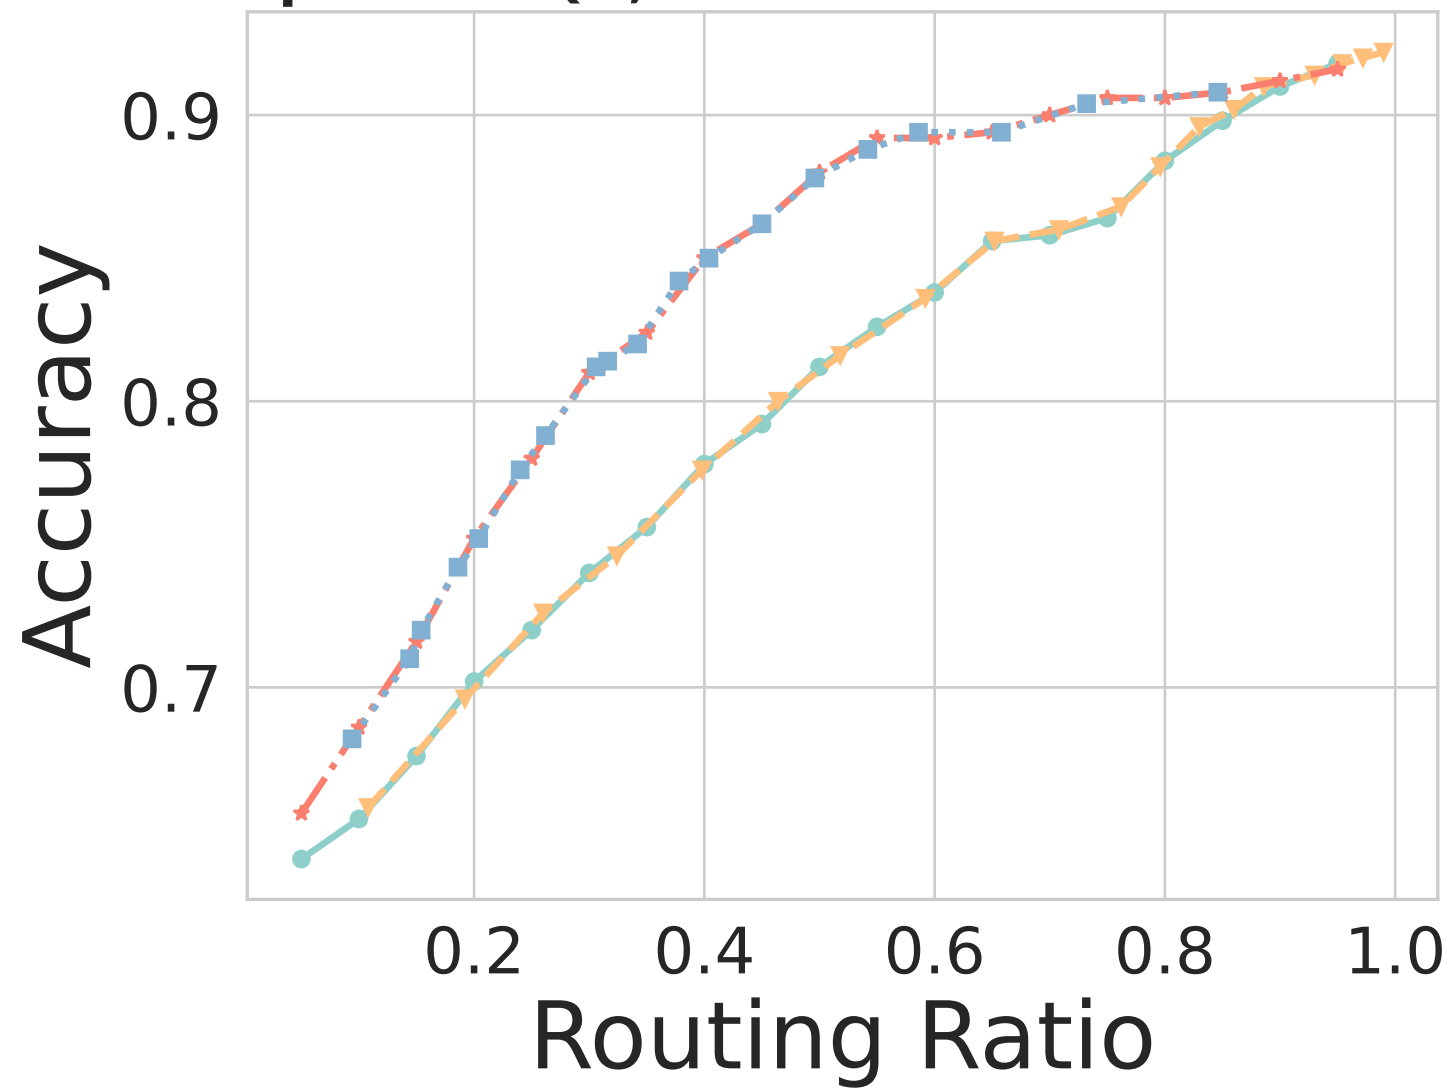

Supplement: supplementary_material [file cali_down_openbook_qa_mistral-7b_gpt-4.1-mini.pdf › Routing_SLM_LLMs/Proxy_routing_prediction/to_gpt-4.1-mini/openbook_qa_as_downstream/cali_down_openbook_qa_mistral-7b_gpt-4.1-mini.pdf]

**OpenBookQA, phi-3.5-mini to GPT-4.1 mini**

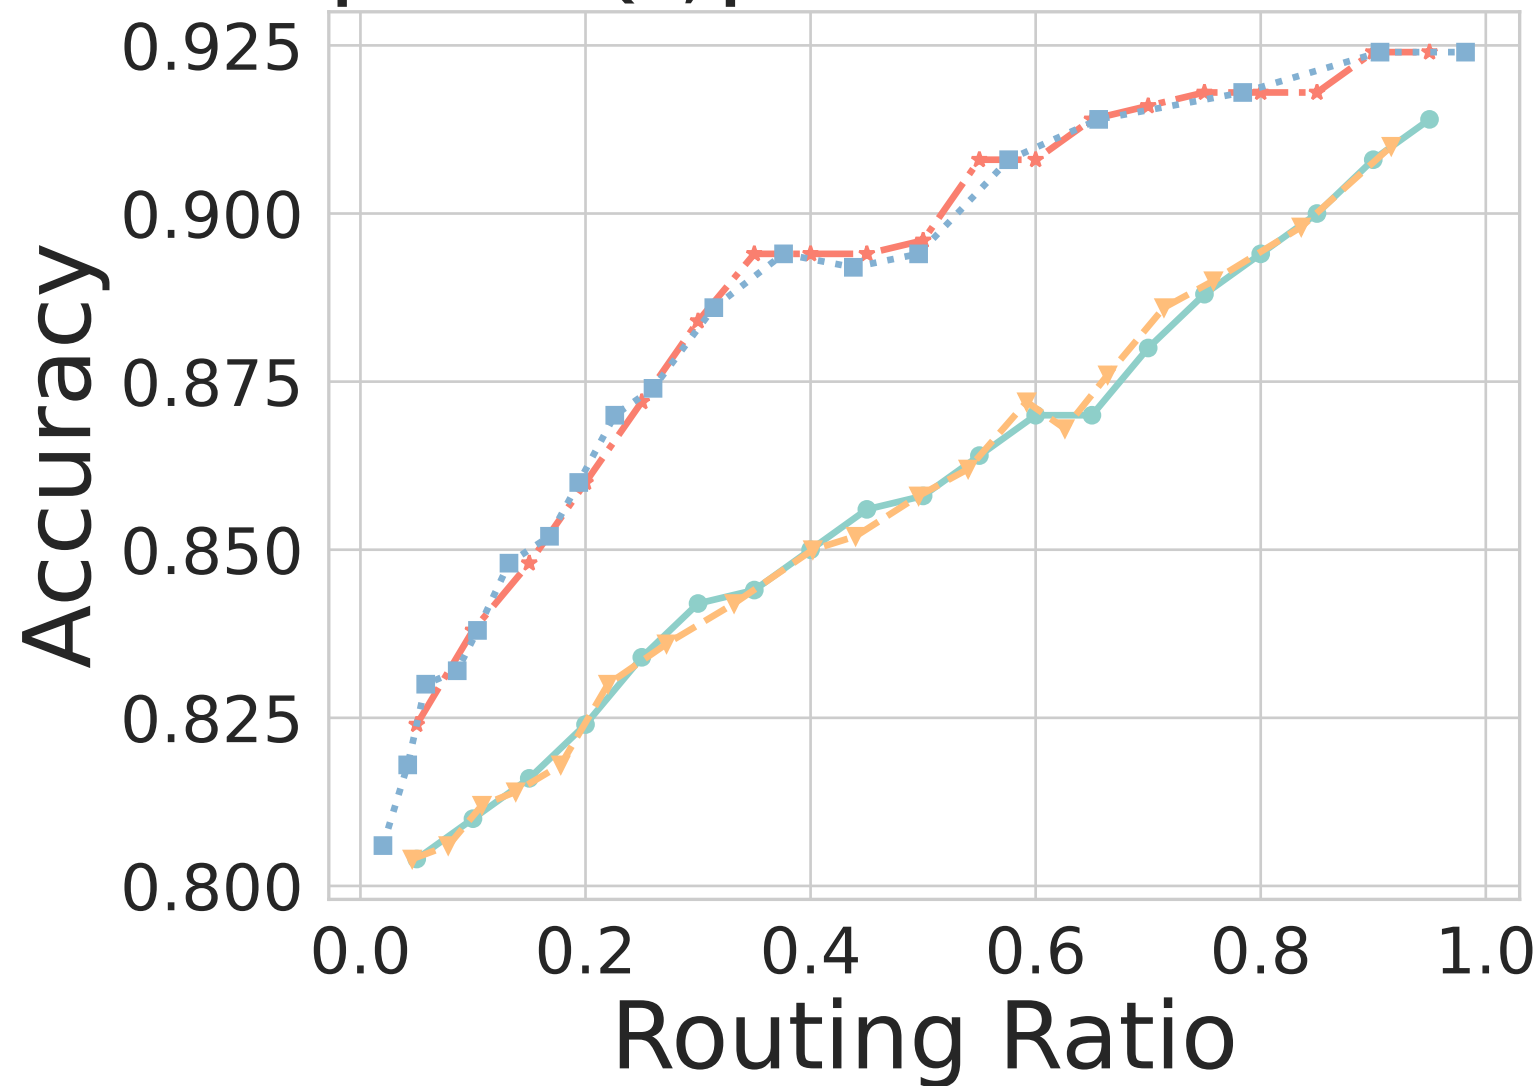

Supplement: supplementary_material [file cali_down_openbook_qa_phi-3.5-mini_gpt-4.1-mini.pdf.pdf › Routing_SLM_LLMs/Proxy_routing_prediction/to_gpt-4.1-mini/openbook_qa_as_downstream/cali_down_openbook_qa_phi-3.5-mini_gpt-4.1-mini.pdf.pdf]

OpenBookQA, phi-4-mini-reasoning to GPT-4.1 mini

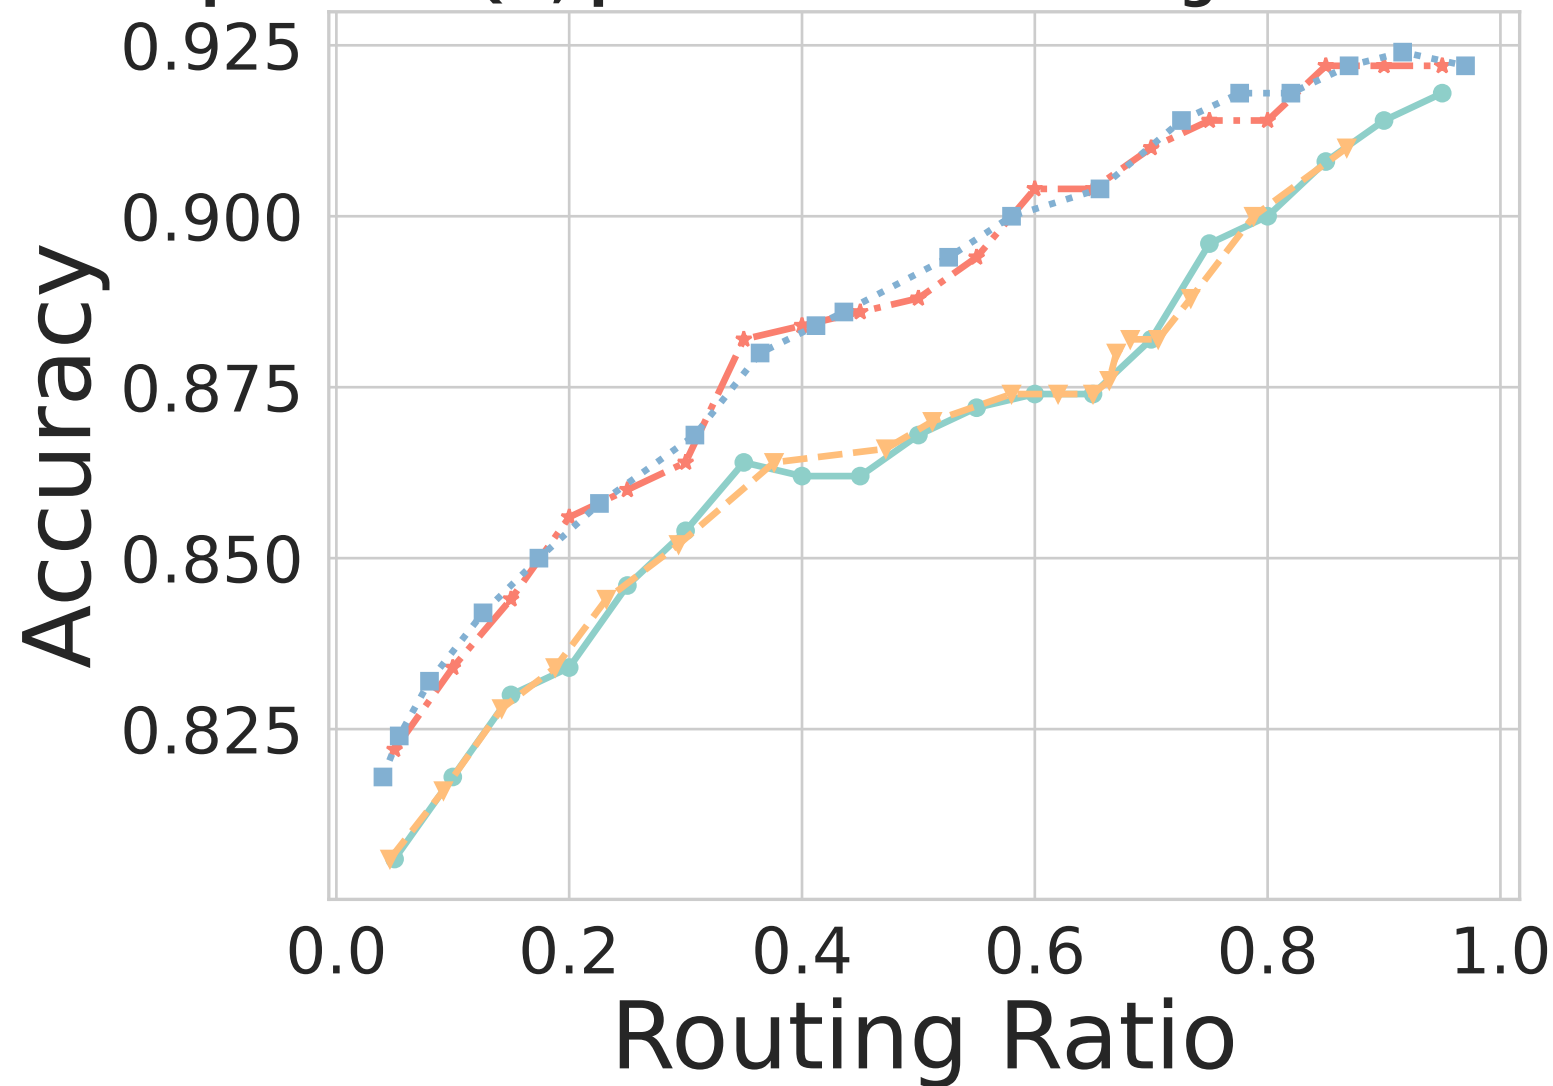

Supplement: supplementary_material [file cali_down_openbook_qa_phi-4-mini-reasoning_gpt-4.1-mini.pdf › Routing_SLM_LLMs/Proxy_routing_prediction/to_gpt-4.1-mini/openbook_qa_as_downstream/cali_down_openbook_qa_phi-4-mini-reasoning_gpt-4.1-mini.pdf]

OpenBookQA, qwen-2.5-7b to GPT-4.1 mini

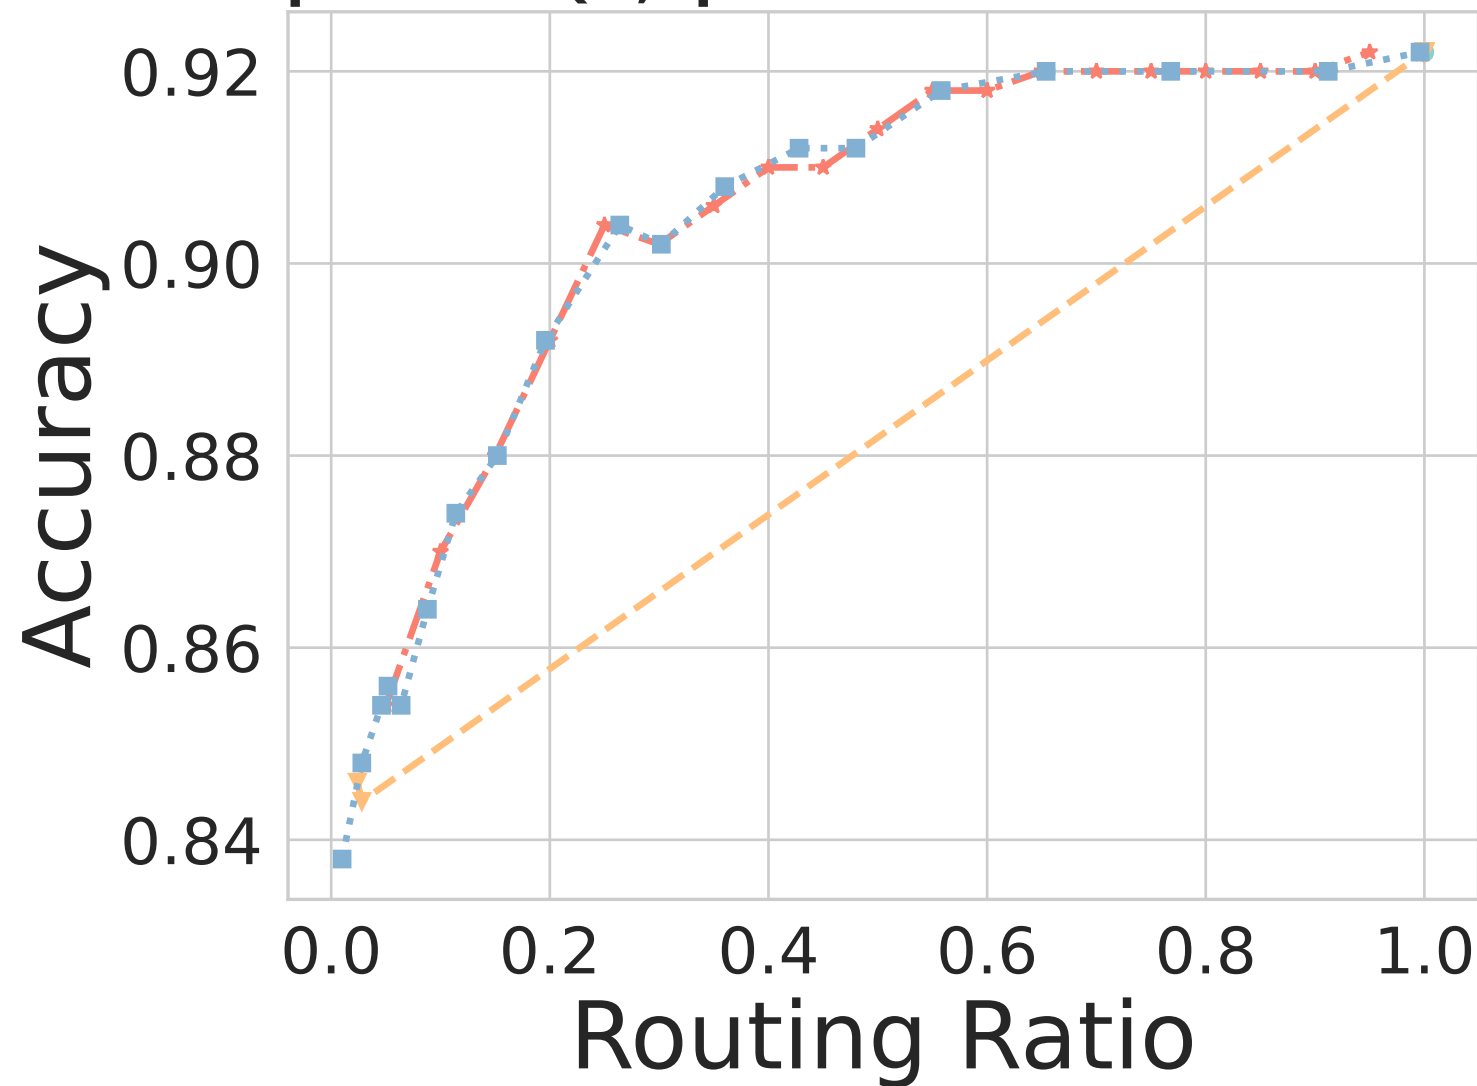

Supplement: supplementary_material [file cali_down_openbook_qa_qwen-2.5-7b_gpt-4.1-mini.pdf › Routing_SLM_LLMs/Proxy_routing_prediction/to_gpt-4.1-mini/openbook_qa_as_downstream/cali_down_openbook_qa_qwen-2.5-7b_gpt-4.1-mini.pdf]

**OpenBookQA, rwkv to GPT-4.1 mini**

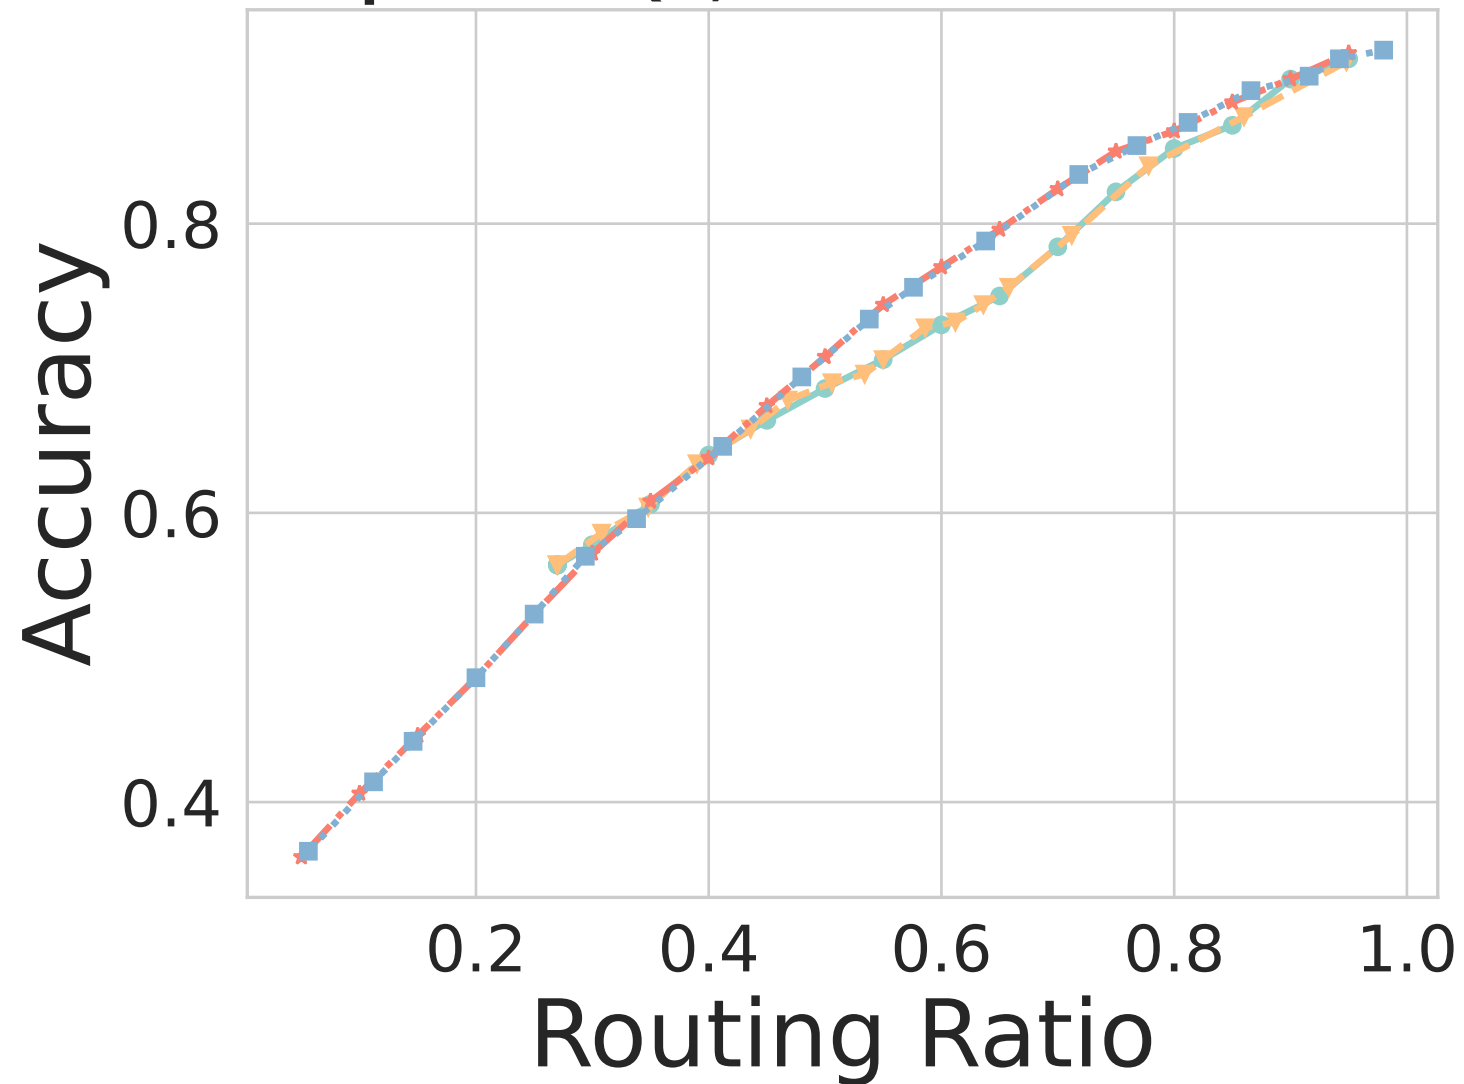

Supplement: supplementary_material [file cali_down_openbook_qa_rwkv_gpt-4.1-mini.pdf › Routing_SLM_LLMs/Proxy_routing_prediction/to_gpt-4.1-mini/openbook_qa_as_downstream/cali_down_openbook_qa_rwkv_gpt-4.1-mini.pdf]

**PIQA, Qwen3-0.6B to GPT-4.1 mini**

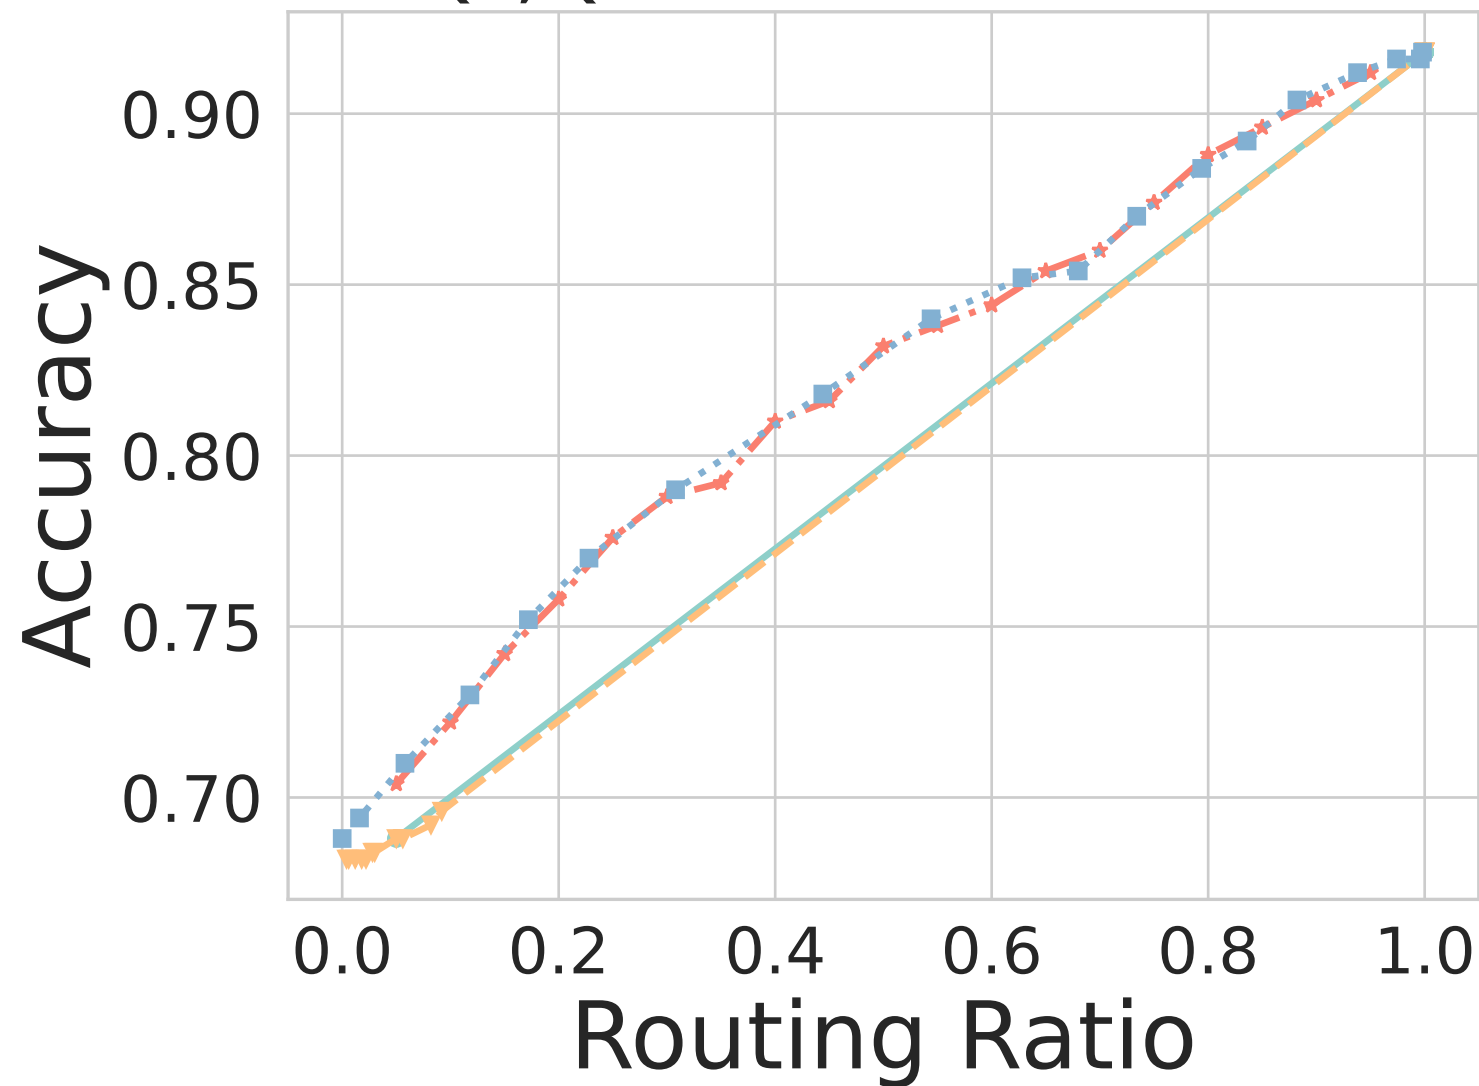

Supplement: supplementary_material [file cali_down_pi_qa_Qwen3-0.6B_gpt-4.1-mini.pdf › Routing_SLM_LLMs/Proxy_routing_prediction/to_gpt-4.1-mini/pi_qa_as_downstream/cali_down_pi_qa_Qwen3-0.6B_gpt-4.1-mini.pdf]

PIQA, Qwen3-1.7B to GPT-4.1 mini

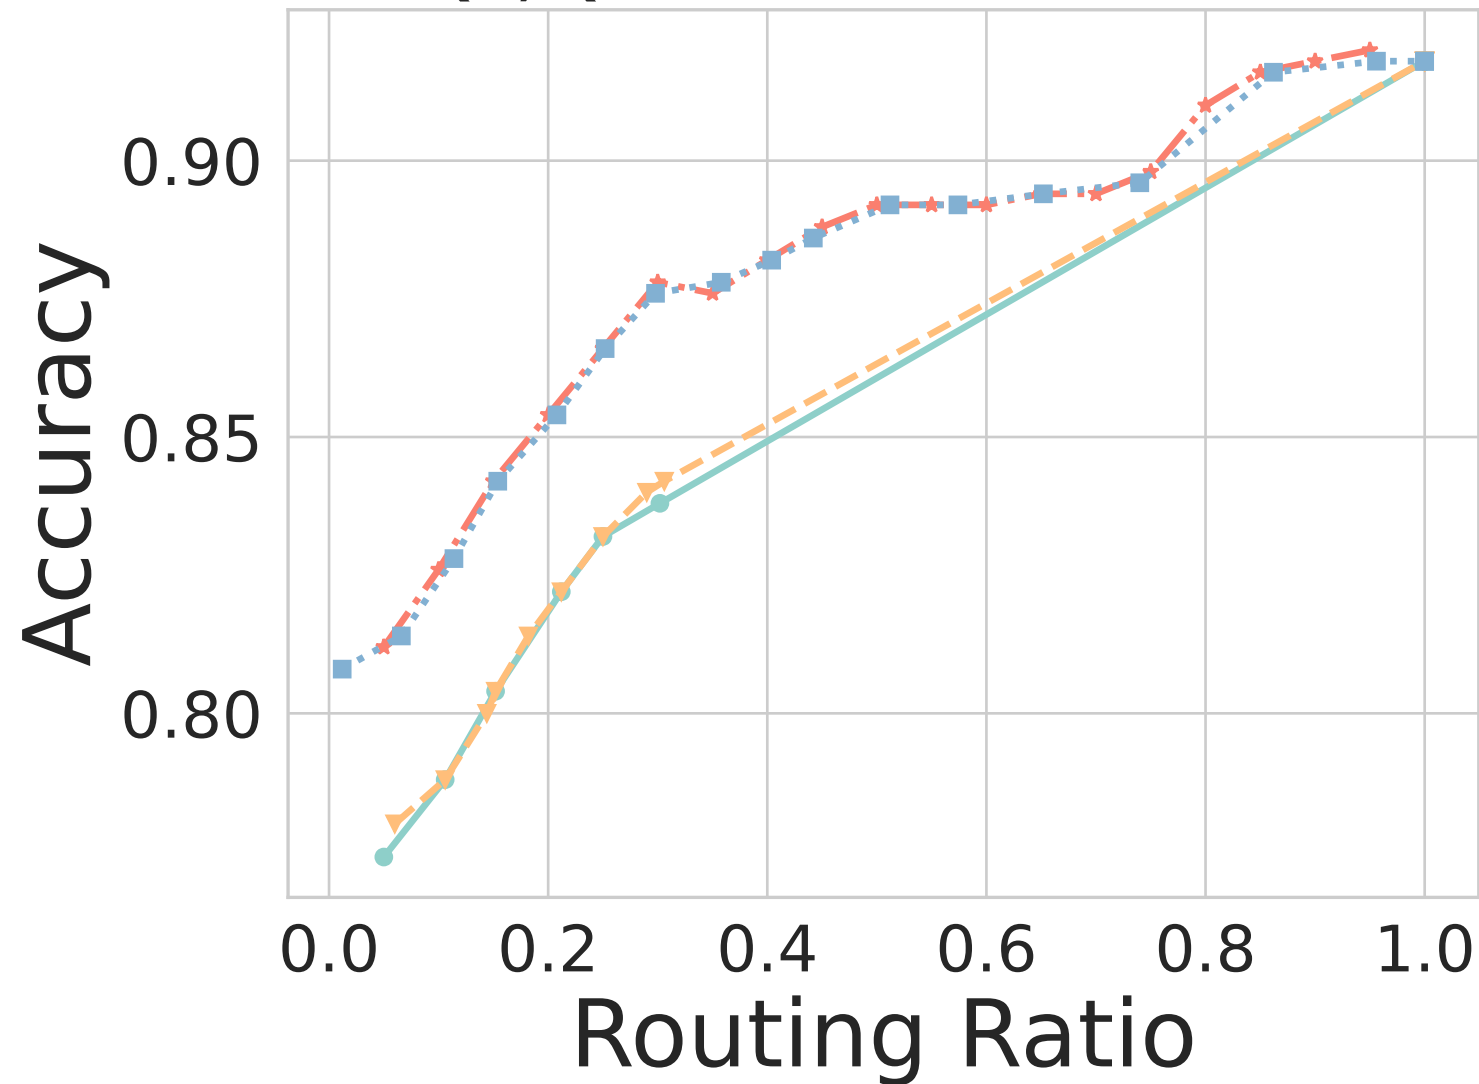

Supplement: supplementary_material [file cali_down_pi_qa_Qwen3-1.7B_gpt-4.1-mini.pdf › Routing_SLM_LLMs/Proxy_routing_prediction/to_gpt-4.1-mini/pi_qa_as_downstream/cali_down_pi_qa_Qwen3-1.7B_gpt-4.1-mini.pdf]

**PIQA, Qwen3-4B to GPT-4.1 mini**

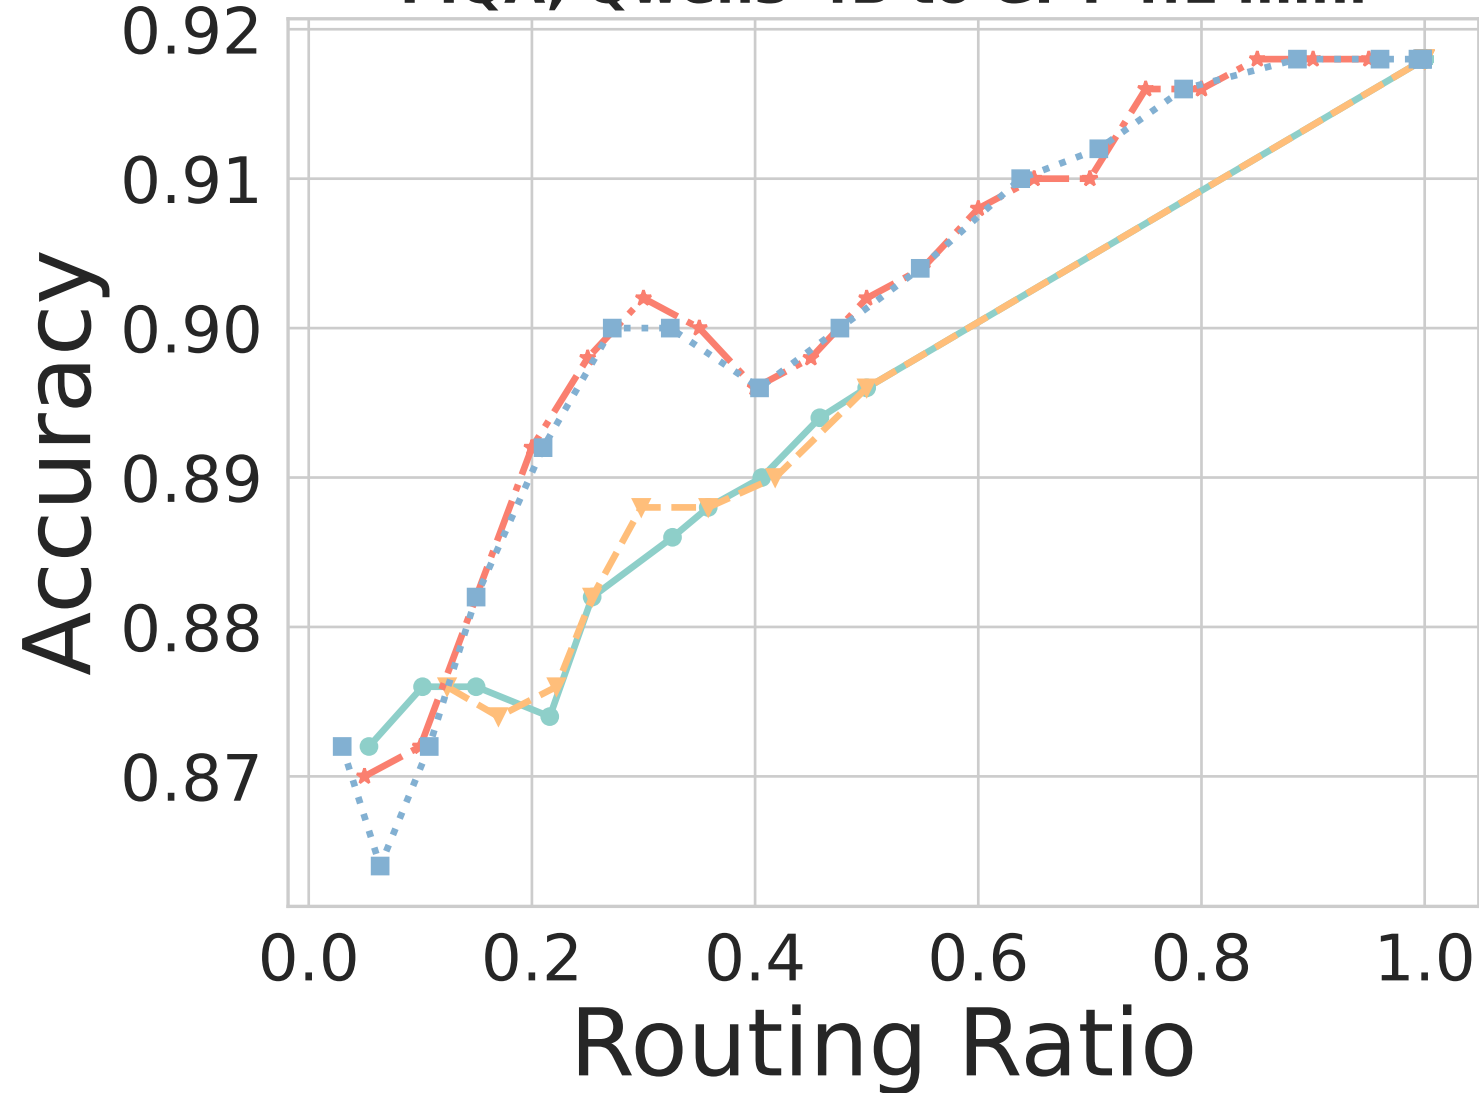

Supplement: supplementary_material [file cali_down_pi_qa_Qwen3-4B_gpt-4.1-mini.pdf › Routing_SLM_LLMs/Proxy_routing_prediction/to_gpt-4.1-mini/pi_qa_as_downstream/cali_down_pi_qa_Qwen3-4B_gpt-4.1-mini.pdf]

**PIQA, granite-3.1-8b to GPT-4.1 mini**

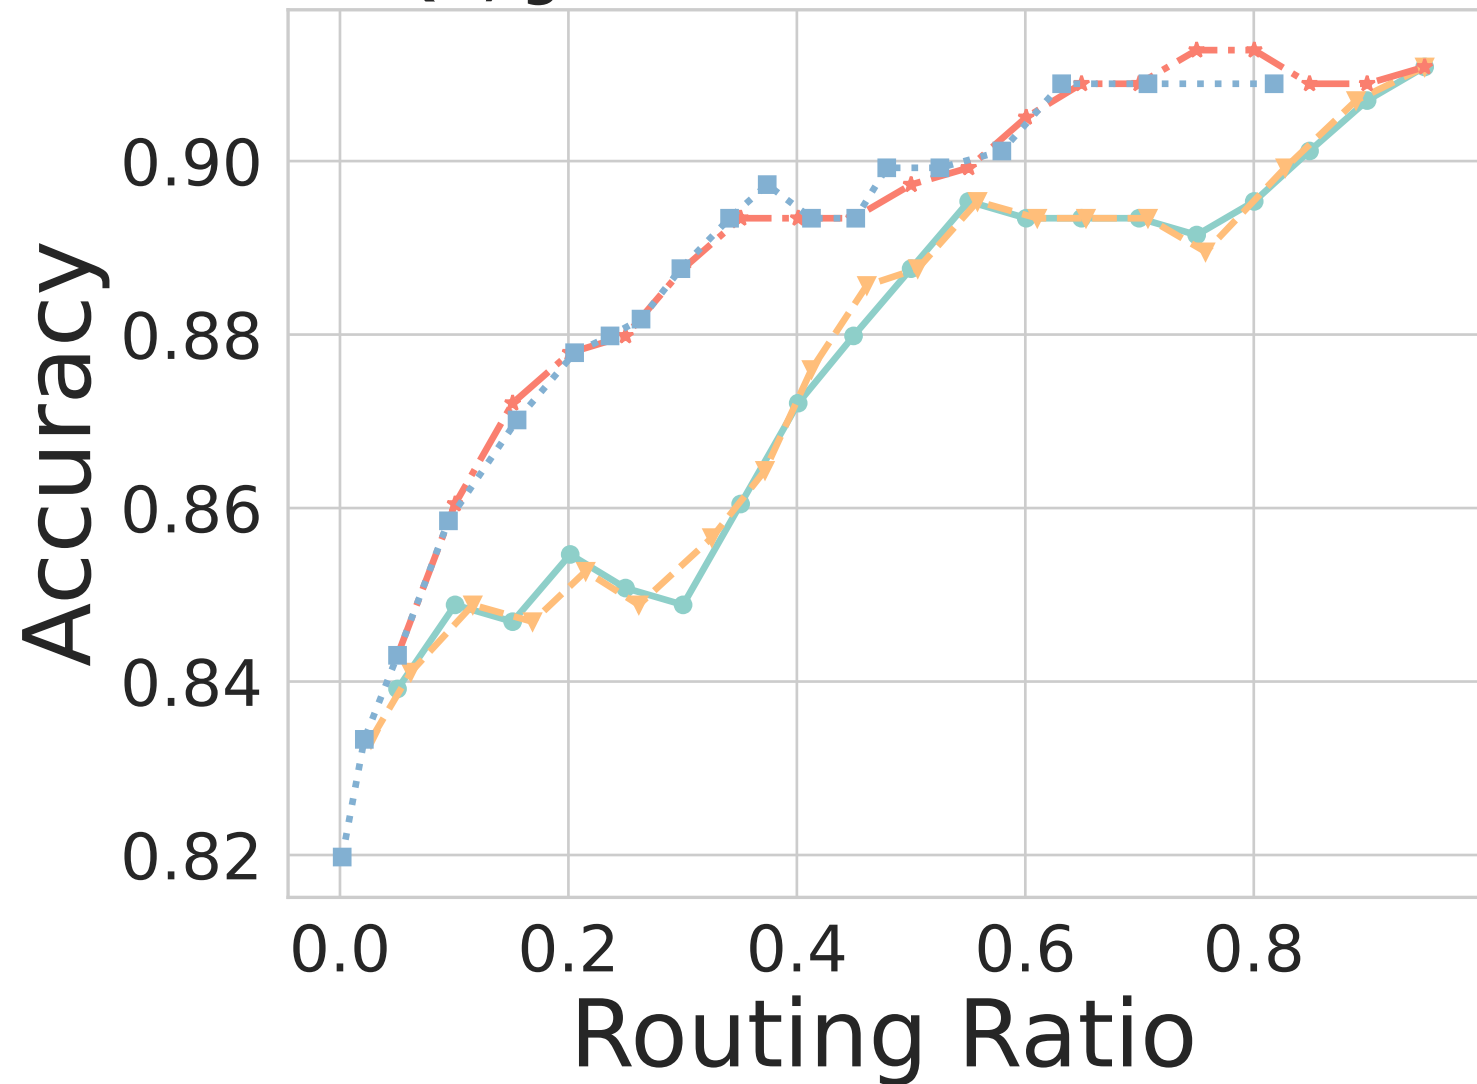

Supplement: supplementary_material [file cali_down_pi_qa_granite-3.1-8b_gpt-4.1-mini.pdf › Routing_SLM_LLMs/Proxy_routing_prediction/to_gpt-4.1-mini/pi_qa_as_downstream/cali_down_pi_qa_granite-3.1-8b_gpt-4.1-mini.pdf]

**PIQA, llama-3.1-8b to GPT-4.1 mini**

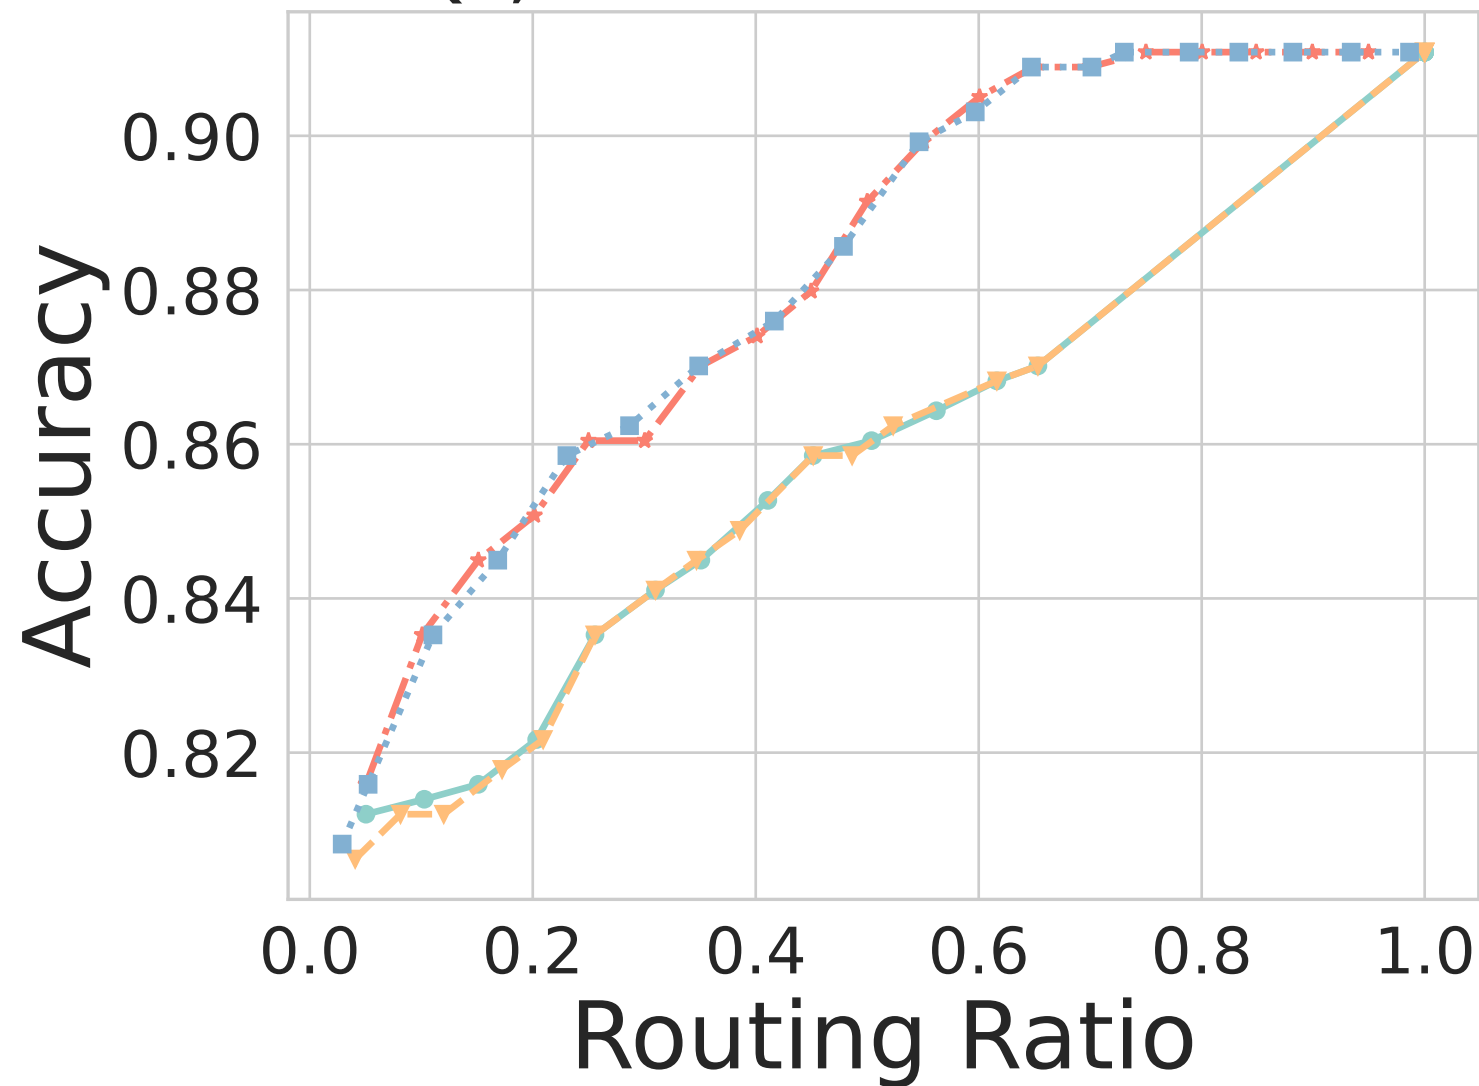

Supplement: supplementary_material [file cali_down_pi_qa_llama-3.1-8b_gpt-4.1-mini.pdf › Routing_SLM_LLMs/Proxy_routing_prediction/to_gpt-4.1-mini/pi_qa_as_downstream/cali_down_pi_qa_llama-3.1-8b_gpt-4.1-mini.pdf]

**PIQA, llama-3.2-1b to GPT-4.1 mini**

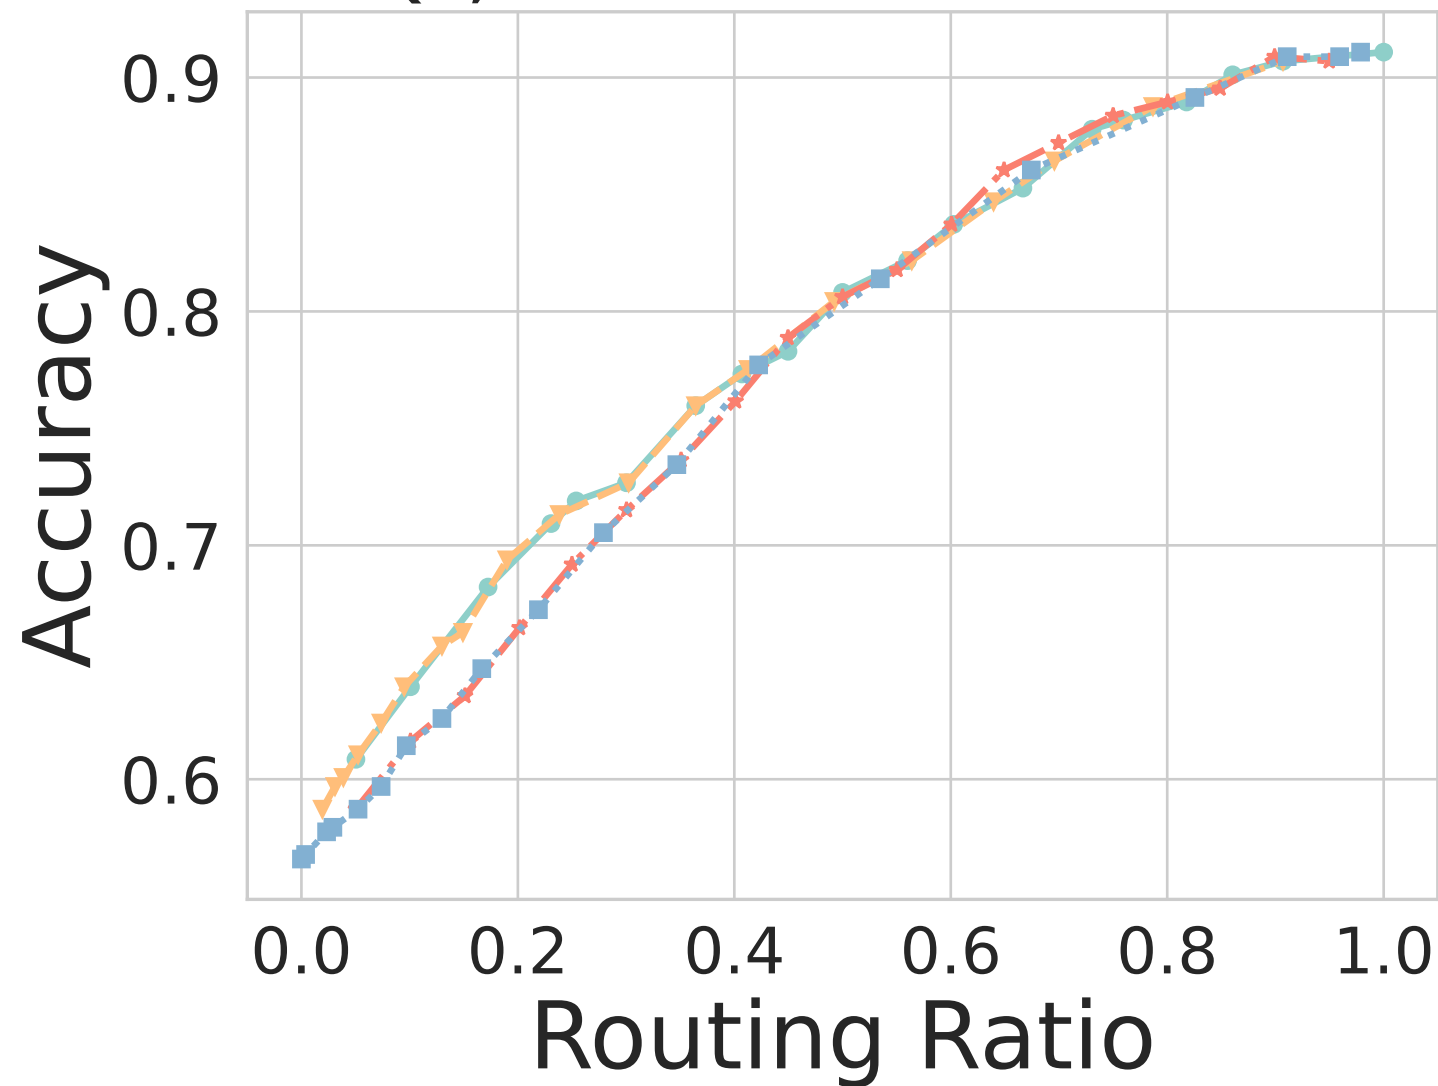

Supplement: supplementary_material [file cali_down_pi_qa_llama-3.2-1b_gpt-4.1-mini.pdf › Routing_SLM_LLMs/Proxy_routing_prediction/to_gpt-4.1-mini/pi_qa_as_downstream/cali_down_pi_qa_llama-3.2-1b_gpt-4.1-mini.pdf]

**PIQA, llama-3.2-3b to GPT-4.1 mini**

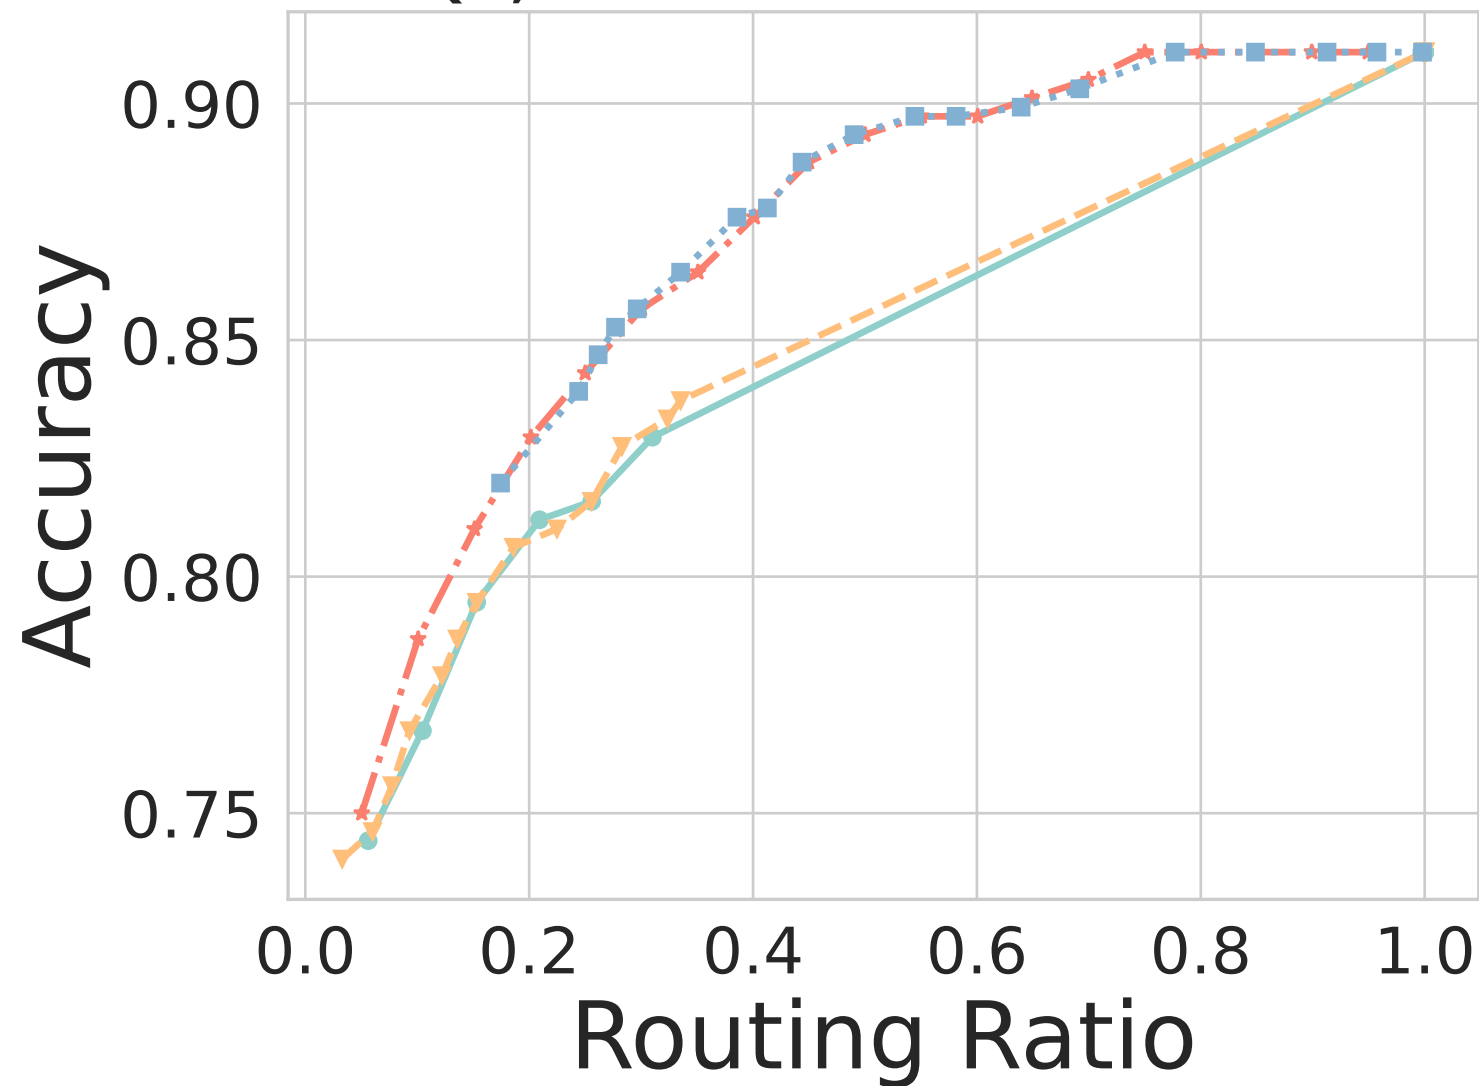

Supplement: supplementary_material [file cali_down_pi_qa_llama-3.2-3b_gpt-4.1-mini.pdf › Routing_SLM_LLMs/Proxy_routing_prediction/to_gpt-4.1-mini/pi_qa_as_downstream/cali_down_pi_qa_llama-3.2-3b_gpt-4.1-mini.pdf]

**PIQA, mistral-7b to GPT-4.1 mini**

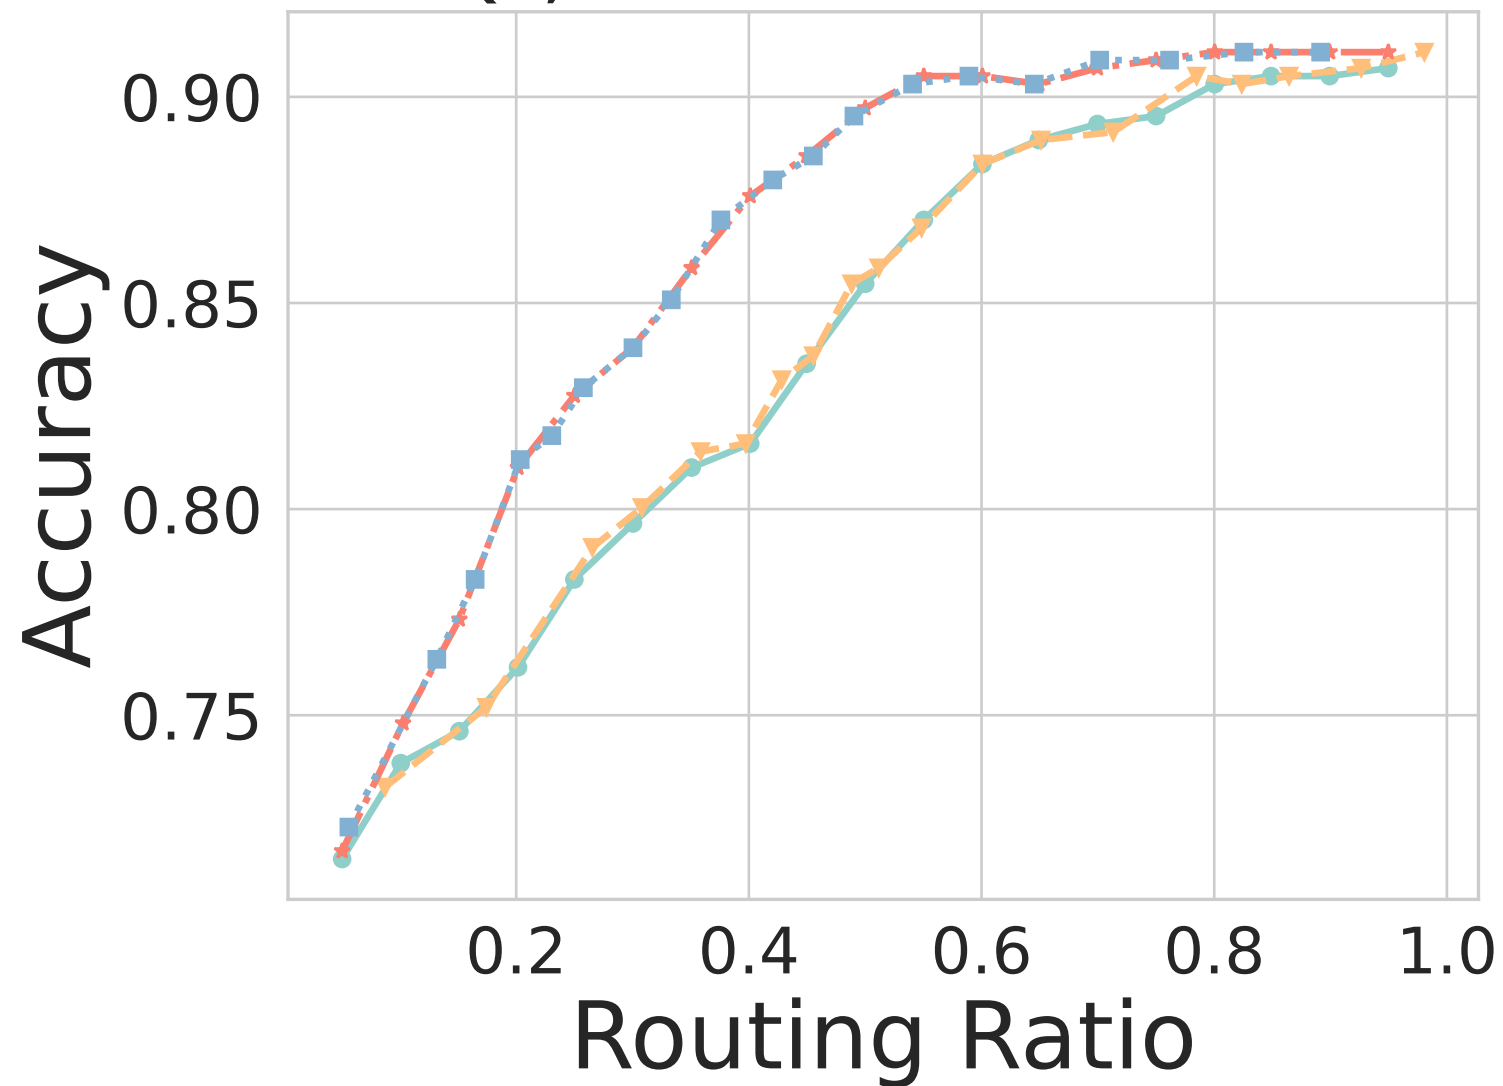

Supplement: supplementary_material [file cali_down_pi_qa_mistral-7b_gpt-4.1-mini.pdf › Routing_SLM_LLMs/Proxy_routing_prediction/to_gpt-4.1-mini/pi_qa_as_downstream/cali_down_pi_qa_mistral-7b_gpt-4.1-mini.pdf]

**PIQA, phi-3.5-mini to GPT-4.1 mini**

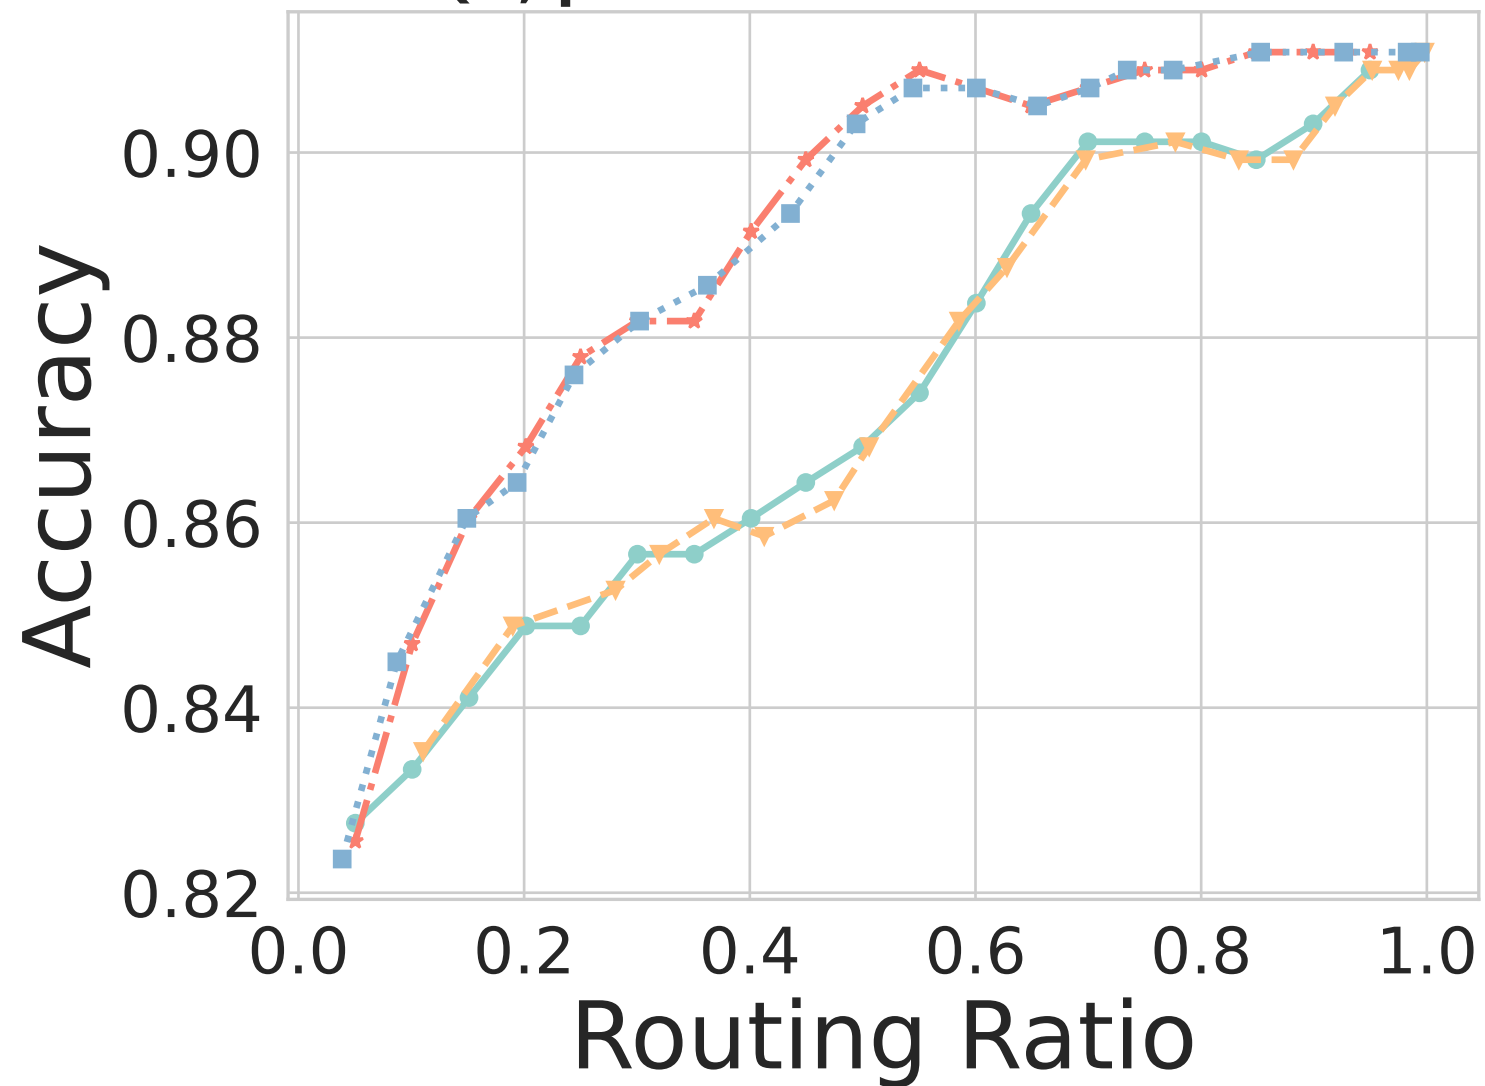

Supplement: supplementary_material [file cali_down_pi_qa_phi-3.5-mini_gpt-4.1-mini.pdf › Routing_SLM_LLMs/Proxy_routing_prediction/to_gpt-4.1-mini/pi_qa_as_downstream/cali_down_pi_qa_phi-3.5-mini_gpt-4.1-mini.pdf]

**PIQA, phi-4-mini-reasoning to GPT-4.1 mini**

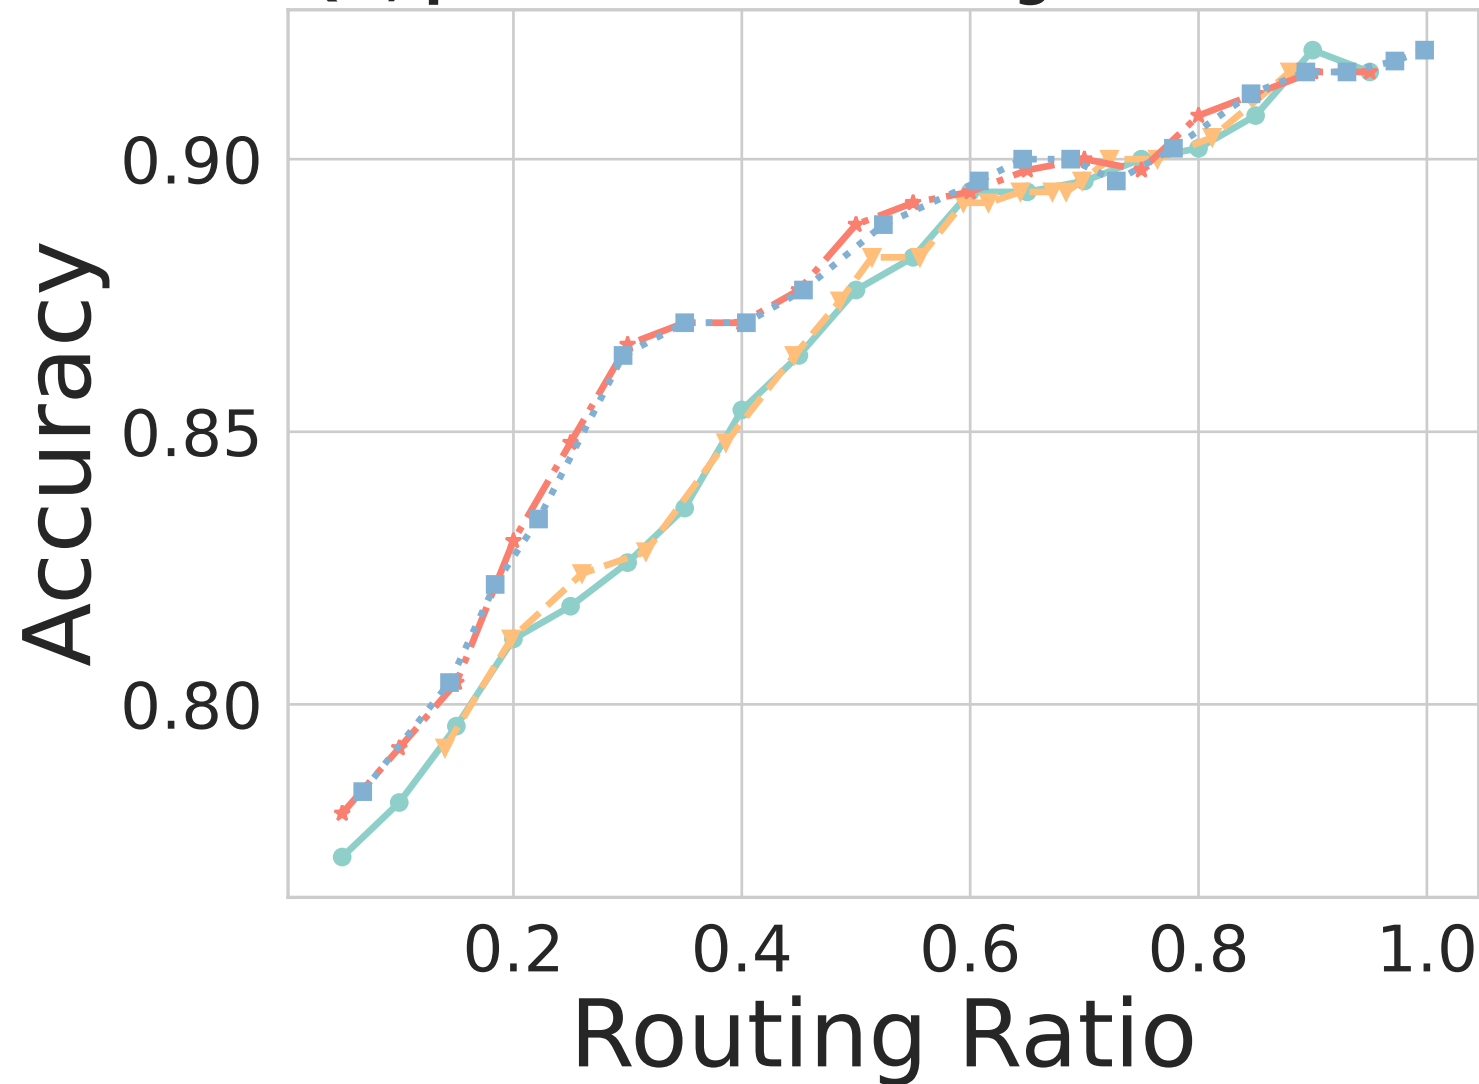

Supplement: supplementary_material [file cali_down_pi_qa_phi-4-mini-reasoning_gpt-4.1-mini.pdf › Routing_SLM_LLMs/Proxy_routing_prediction/to_gpt-4.1-mini/pi_qa_as_downstream/cali_down_pi_qa_phi-4-mini-reasoning_gpt-4.1-mini.pdf]

**PIQA, qwen-2.5-7b to GPT-4.1 mini**

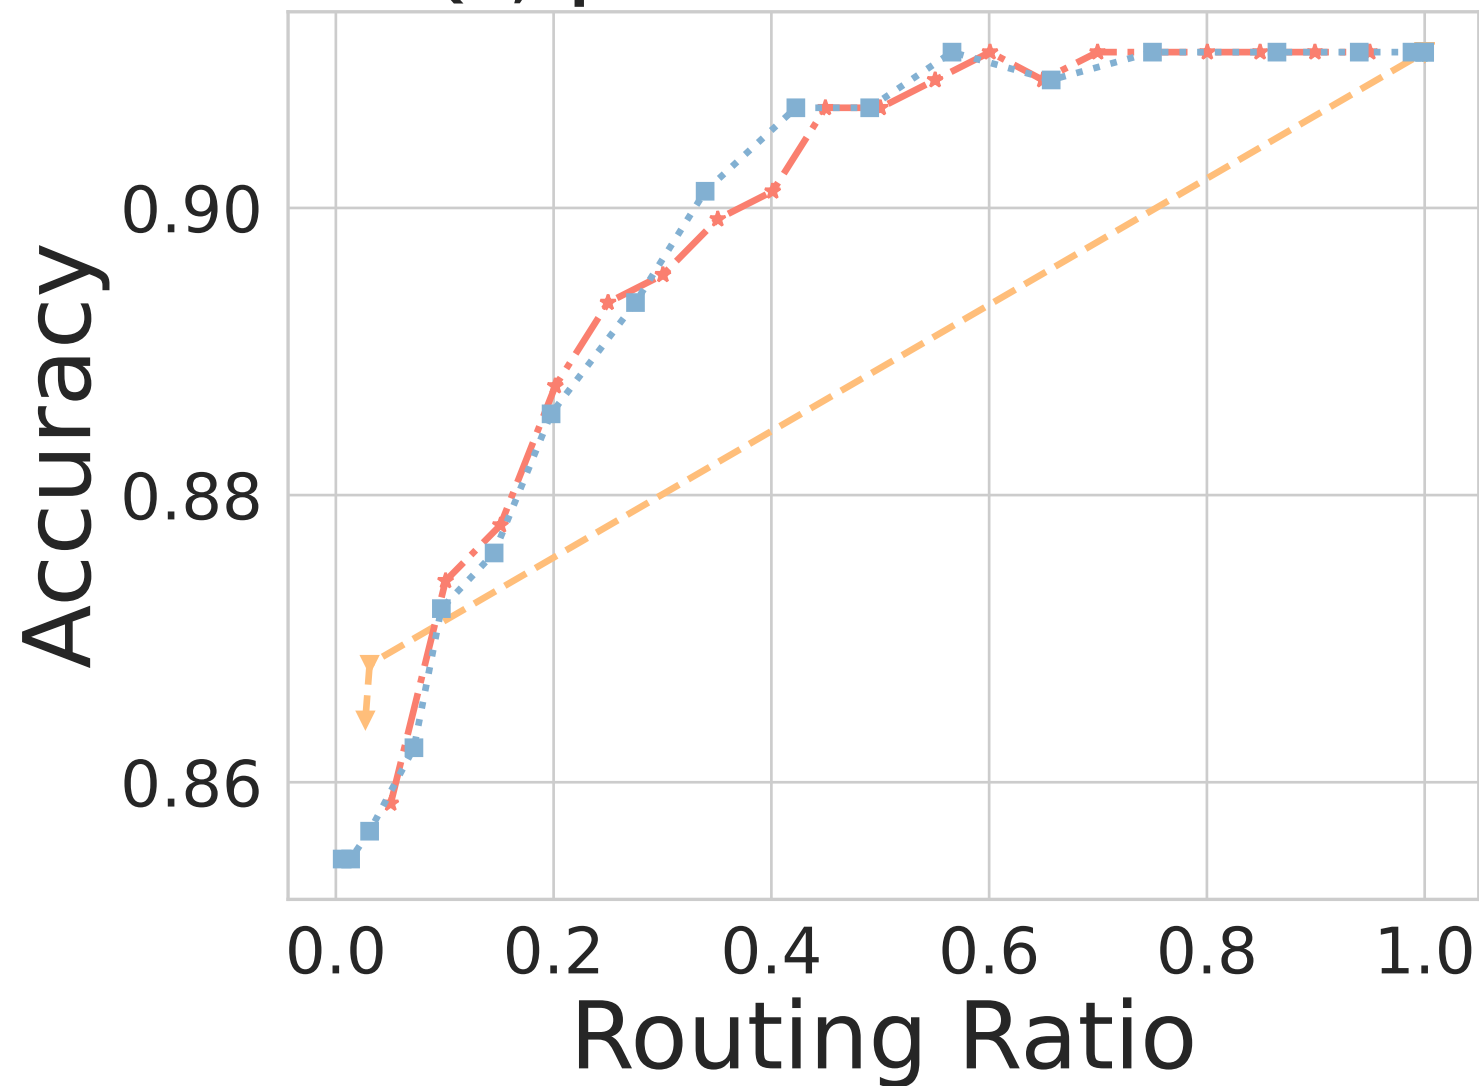

Supplement: supplementary_material [file cali_down_pi_qa_qwen-2.5-7b_gpt-4.1-mini.pdf › Routing_SLM_LLMs/Proxy_routing_prediction/to_gpt-4.1-mini/pi_qa_as_downstream/cali_down_pi_qa_qwen-2.5-7b_gpt-4.1-mini.pdf]

**PIQA, rwkv to GPT-4.1 mini**

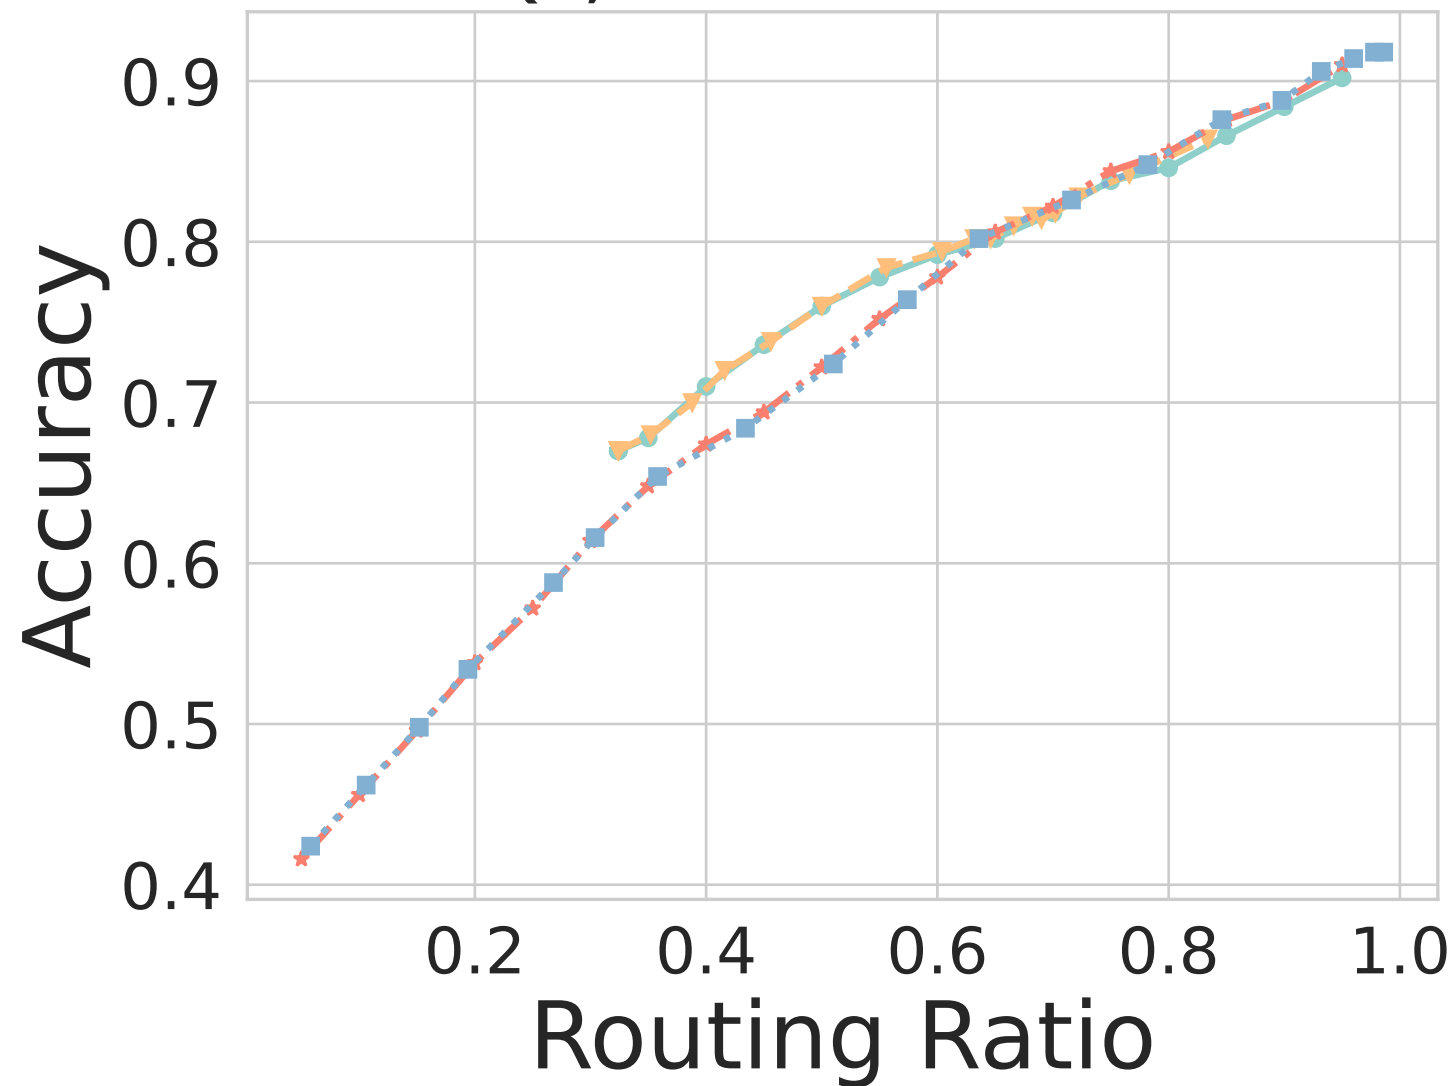

Supplement: supplementary_material [file cali_down_pi_qa_rwkv_gpt-4.1-mini.pdf › Routing_SLM_LLMs/Proxy_routing_prediction/to_gpt-4.1-mini/pi_qa_as_downstream/cali_down_pi_qa_rwkv_gpt-4.1-mini.pdf]

**Social IQa, Qwen3-0.6B to GPT-4.1 mini**

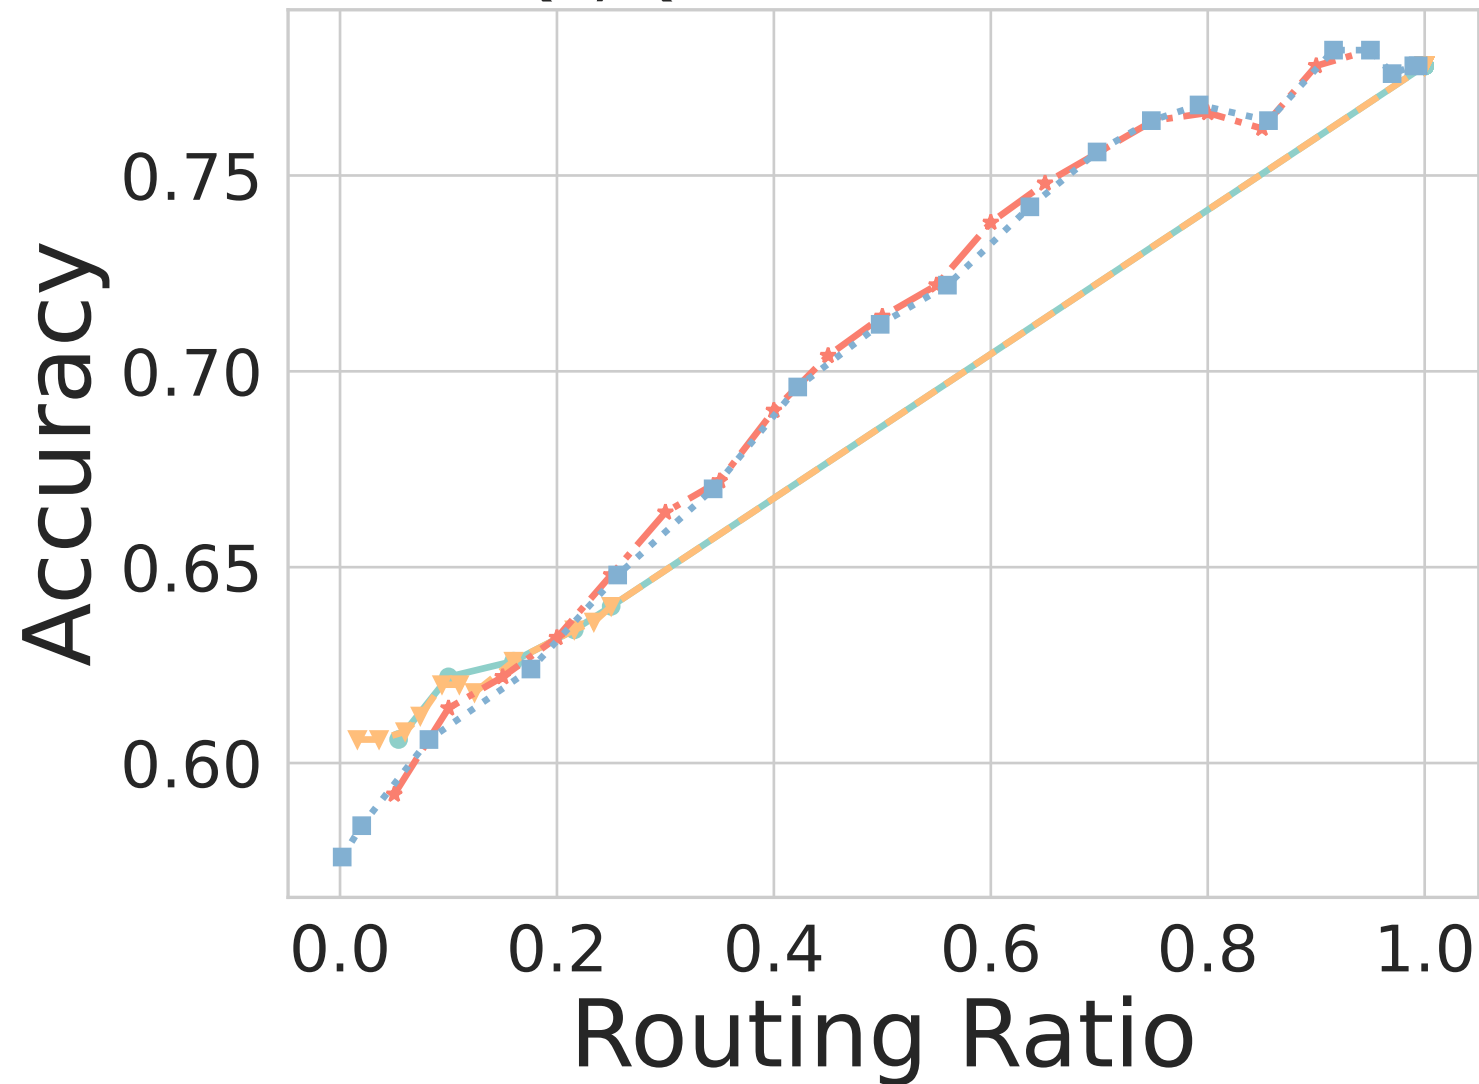

Supplement: supplementary_material [file cali_down_social_i_qa_Qwen3-0.6B_gpt-4.1-mini.pdf › Routing_SLM_LLMs/Proxy_routing_prediction/to_gpt-4.1-mini/social_i_qa_as_downstream/cali_down_social_i_qa_Qwen3-0.6B_gpt-4.1-mini.pdf]

**Social IQa, Qwen3-1.7B to GPT-4.1 mini**

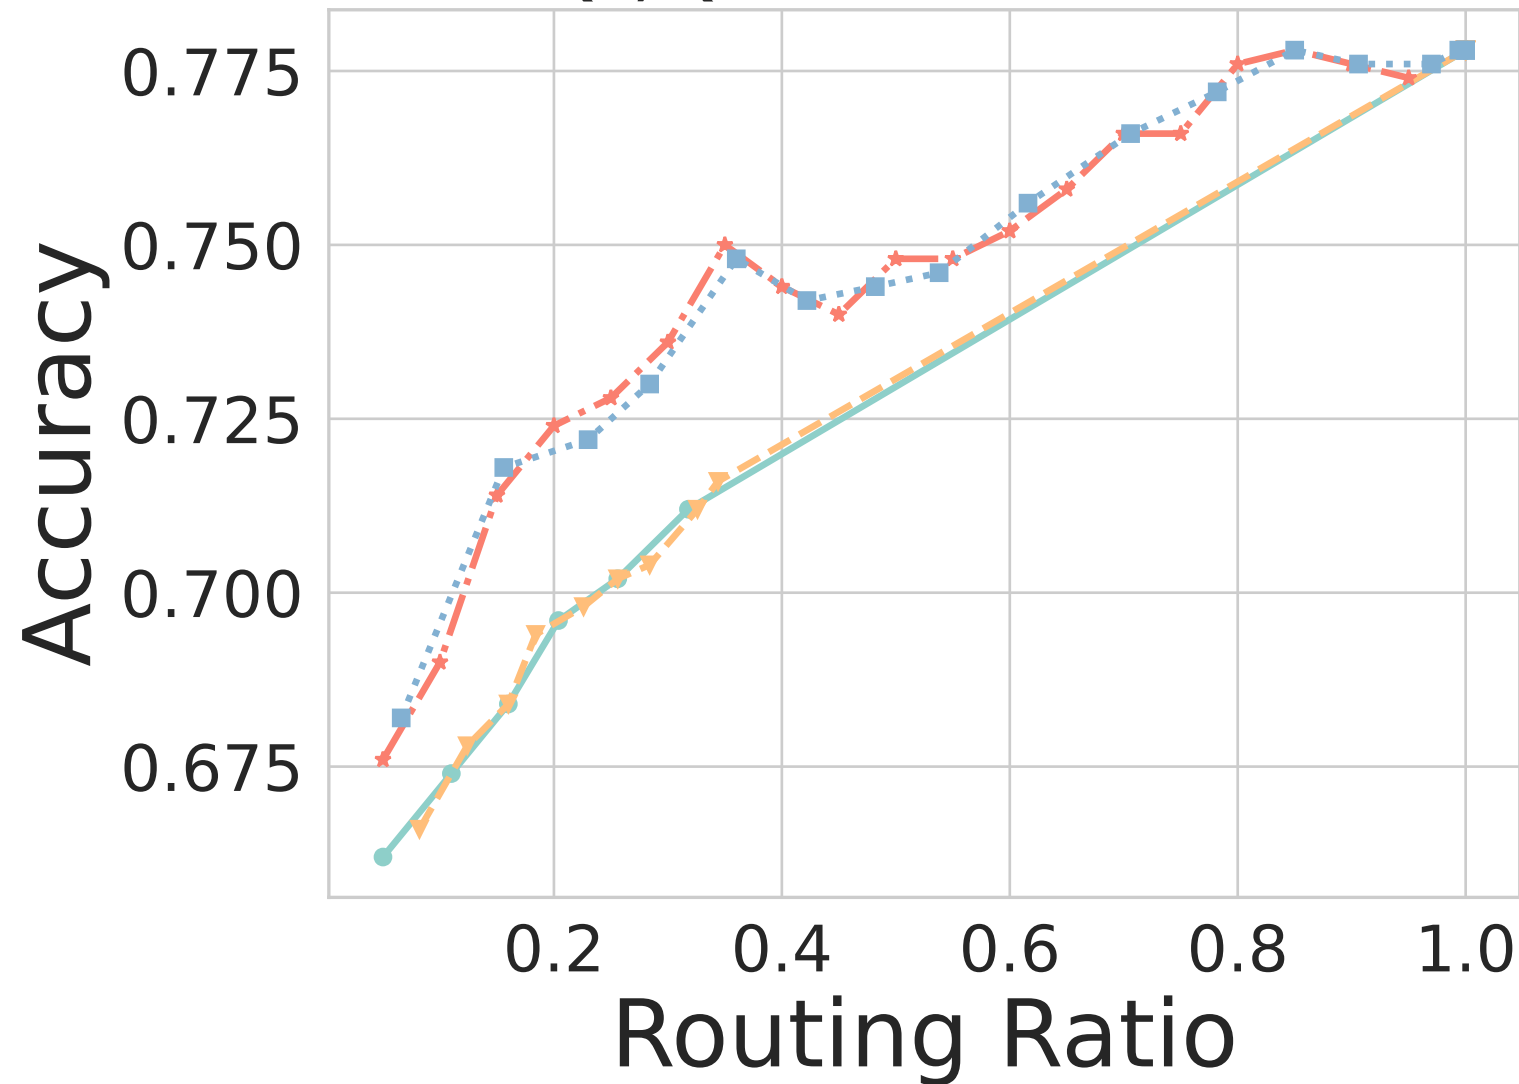

Supplement: supplementary_material [file cali_down_social_i_qa_Qwen3-1.7B_gpt-4.1-mini.pdf › Routing_SLM_LLMs/Proxy_routing_prediction/to_gpt-4.1-mini/social_i_qa_as_downstream/cali_down_social_i_qa_Qwen3-1.7B_gpt-4.1-mini.pdf]

**Social IQa, Qwen3-4B to GPT-4.1 mini**

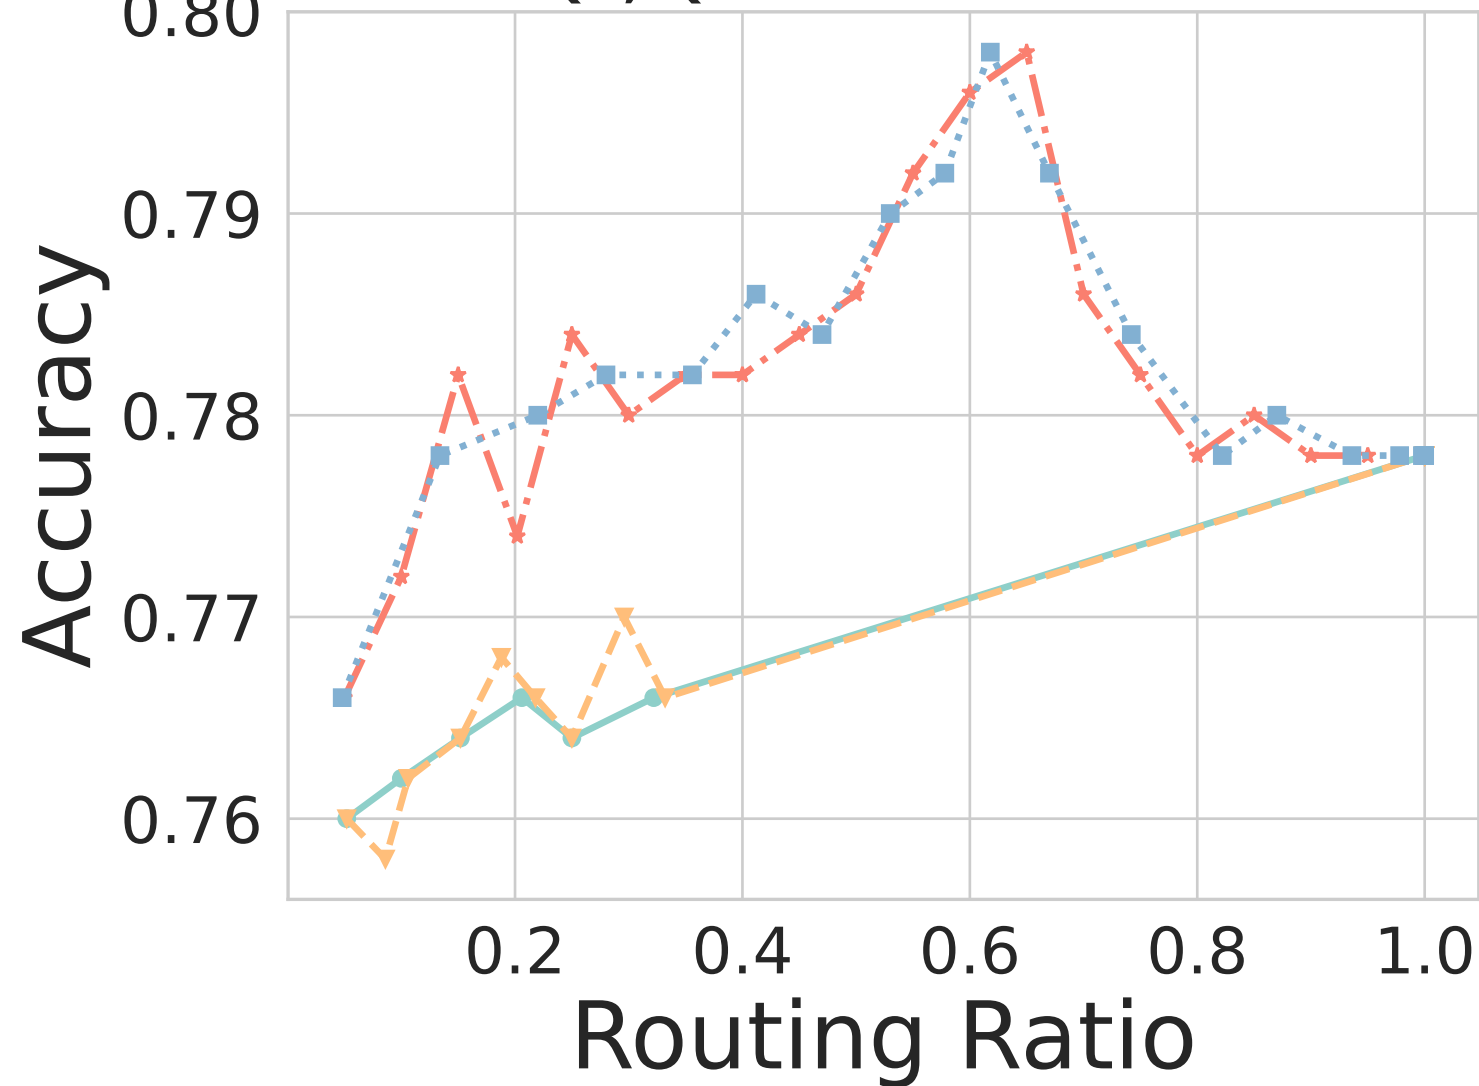

Supplement: supplementary_material [file cali_down_social_i_qa_Qwen3-4B_gpt-4.1-mini.pdf › Routing_SLM_LLMs/Proxy_routing_prediction/to_gpt-4.1-mini/social_i_qa_as_downstream/cali_down_social_i_qa_Qwen3-4B_gpt-4.1-mini.pdf]

**Social IQa, granite-3.1-8b to GPT-4.1 mini**

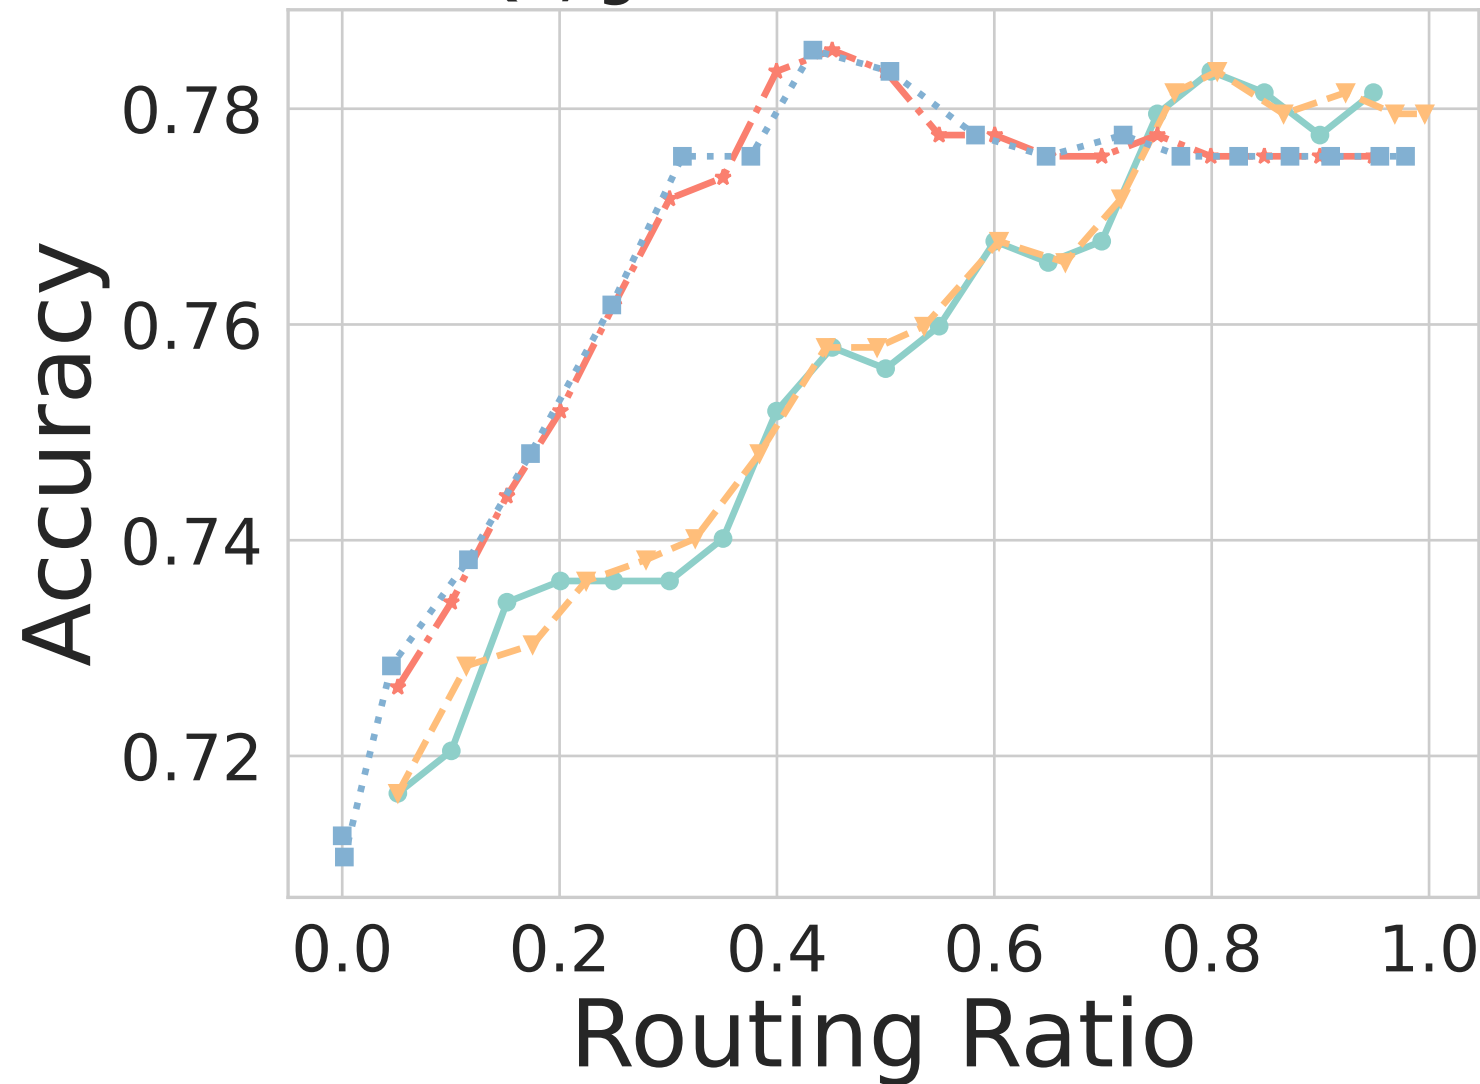

Supplement: supplementary_material [file cali_down_social_i_qa_granite-3.1-8b_gpt-4.1-mini.pdf › Routing_SLM_LLMs/Proxy_routing_prediction/to_gpt-4.1-mini/social_i_qa_as_downstream/cali_down_social_i_qa_granite-3.1-8b_gpt-4.1-mini.pdf]

**Social IQa, llama-3.1-8b to GPT-4.1 mini**

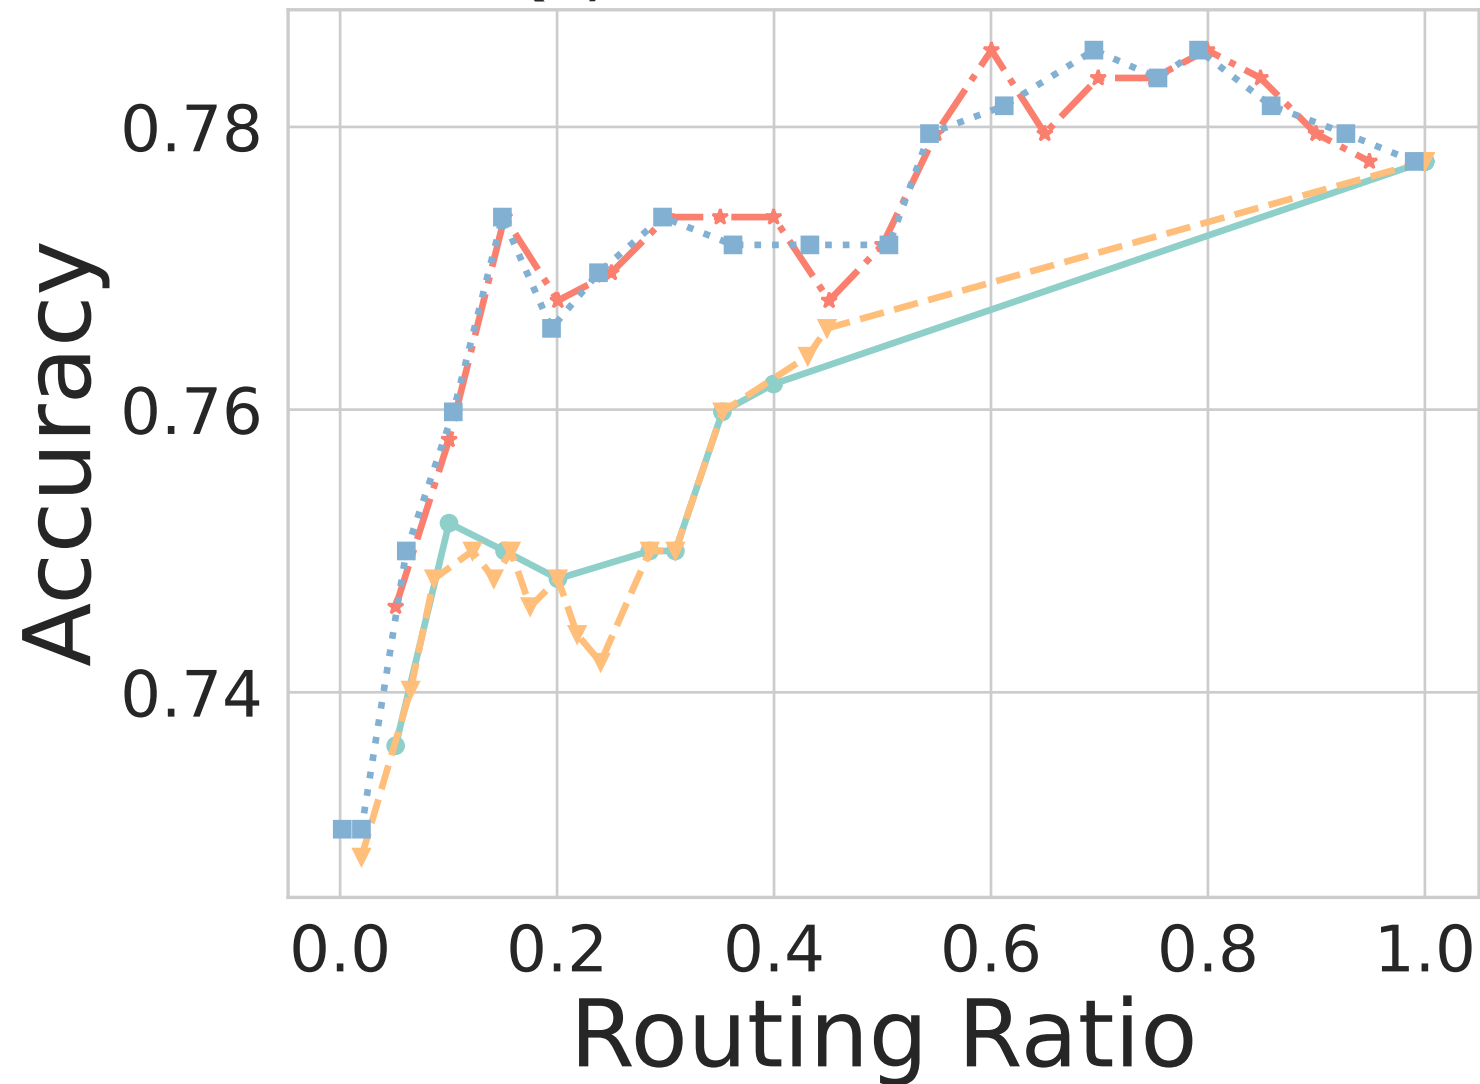

Supplement: supplementary_material [file cali_down_social_i_qa_llama-3.1-8b_gpt-4.1-mini.pdf › Routing_SLM_LLMs/Proxy_routing_prediction/to_gpt-4.1-mini/social_i_qa_as_downstream/cali_down_social_i_qa_llama-3.1-8b_gpt-4.1-mini.pdf]

**Social IQa, llama-3.2-1b to GPT-4.1 mini**

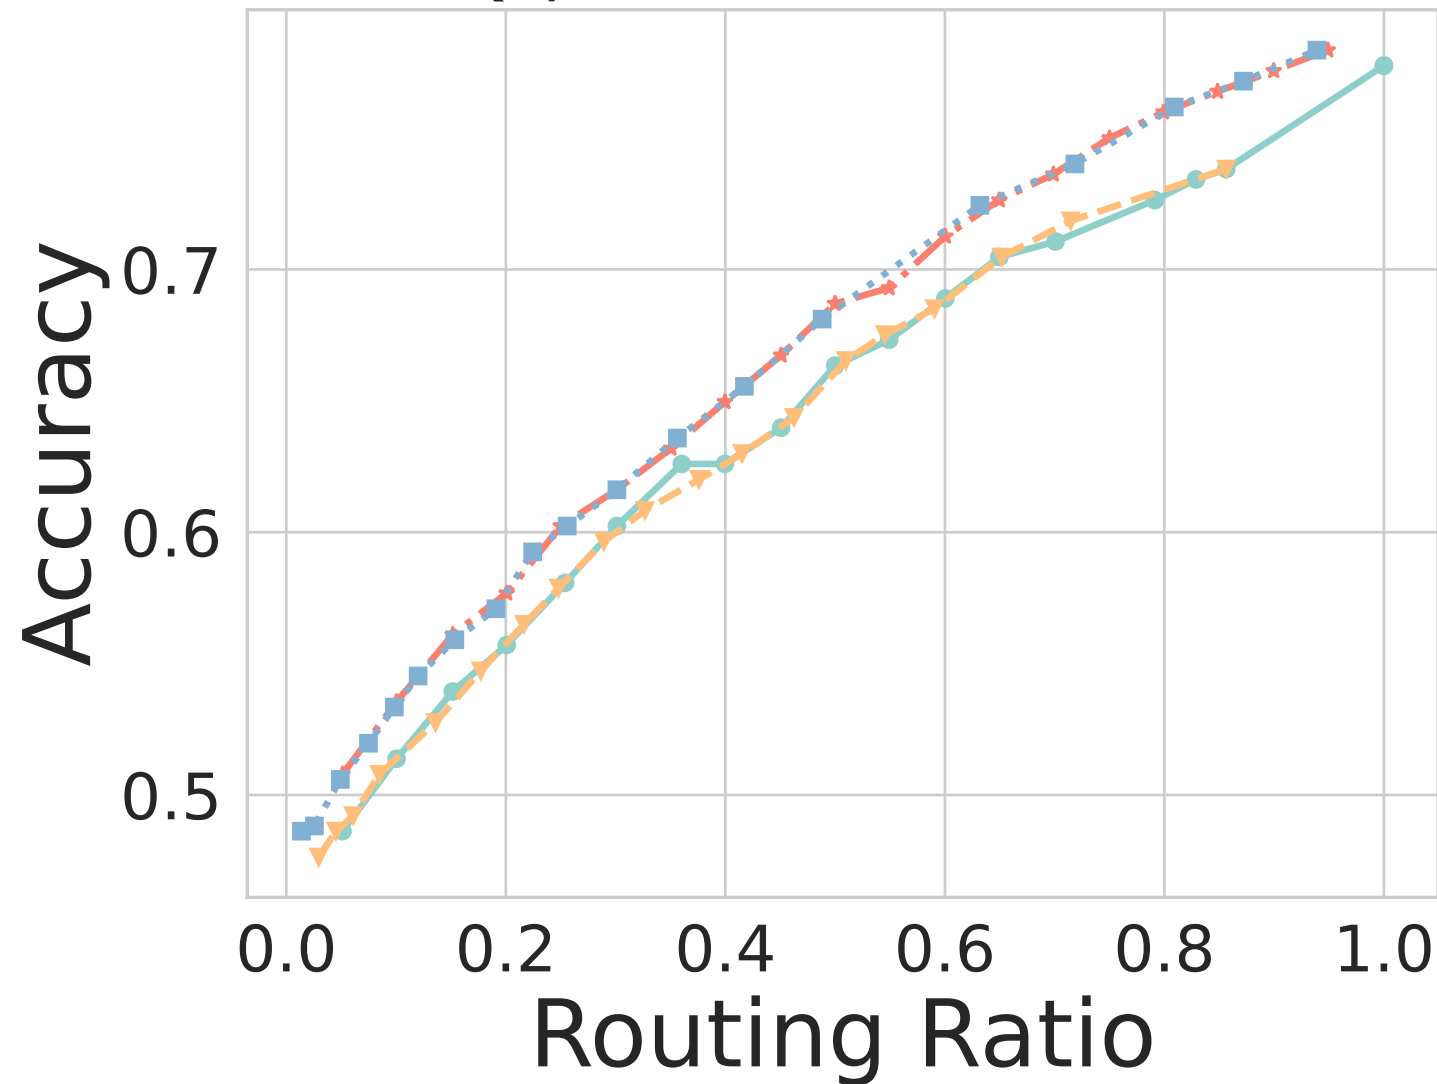

Supplement: supplementary_material [file cali_down_social_i_qa_llama-3.2-1b_gpt-4.1-mini.pdf › Routing_SLM_LLMs/Proxy_routing_prediction/to_gpt-4.1-mini/social_i_qa_as_downstream/cali_down_social_i_qa_llama-3.2-1b_gpt-4.1-mini.pdf]

**Social IQa, llama-3.2-3b to GPT-4.1 mini**

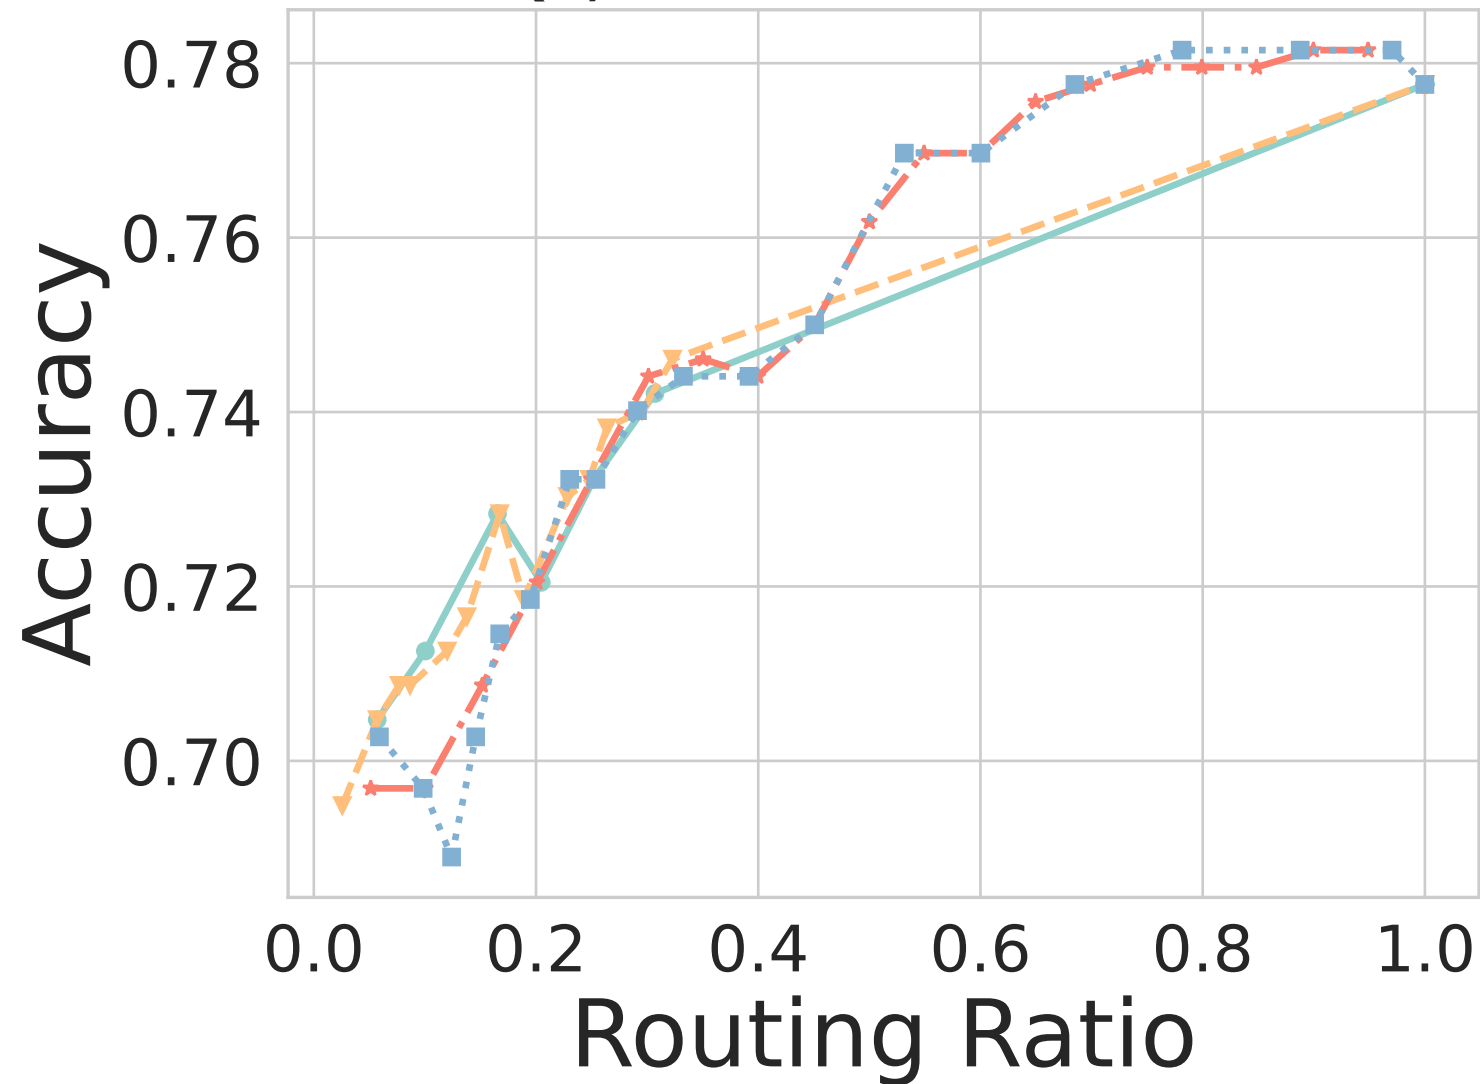

Supplement: supplementary_material [file cali_down_social_i_qa_llama-3.2-3b_gpt-4.1-mini.pdf › Routing_SLM_LLMs/Proxy_routing_prediction/to_gpt-4.1-mini/social_i_qa_as_downstream/cali_down_social_i_qa_llama-3.2-3b_gpt-4.1-mini.pdf]

**Social IQa, mistral-7b to GPT-4.1 mini**

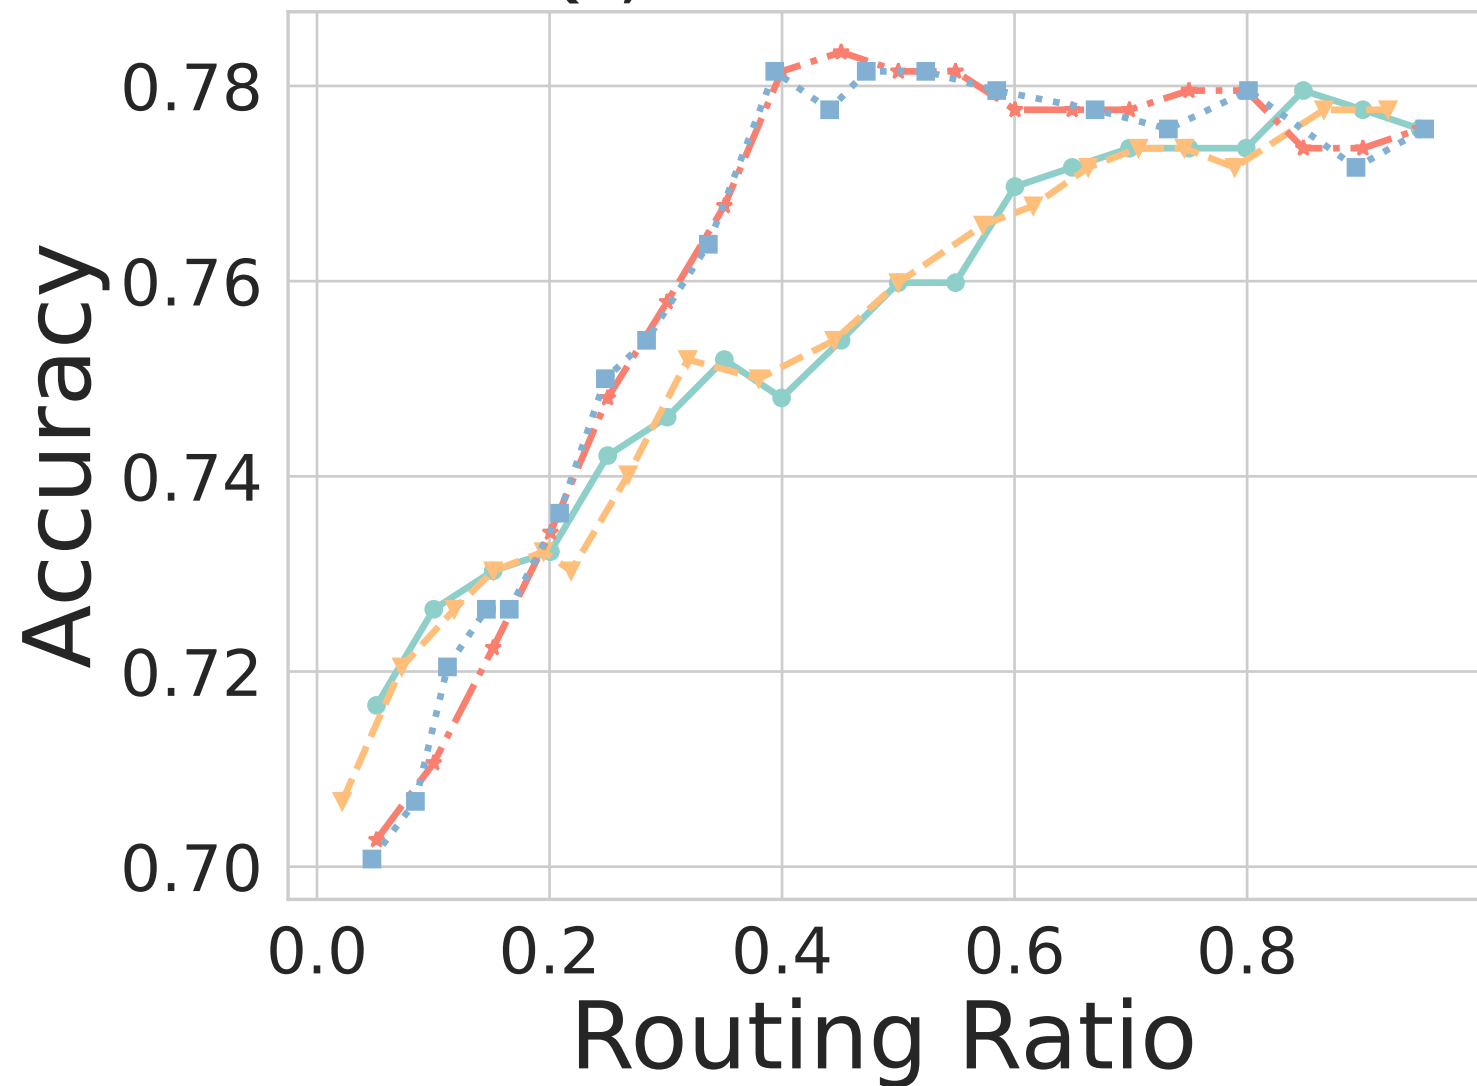

Supplement: supplementary_material [file cali_down_social_i_qa_mistral-7b_gpt-4.1-mini.pdf › Routing_SLM_LLMs/Proxy_routing_prediction/to_gpt-4.1-mini/social_i_qa_as_downstream/cali_down_social_i_qa_mistral-7b_gpt-4.1-mini.pdf]
