# Supplementary material (part 7 of 14)
Source: ML conference proceedings conference paper supplement (https://openreview.net/forum?id=smdbra3VEi)

**HellaSwag, Qwen3-0.6B to Llama-3.1-70B**

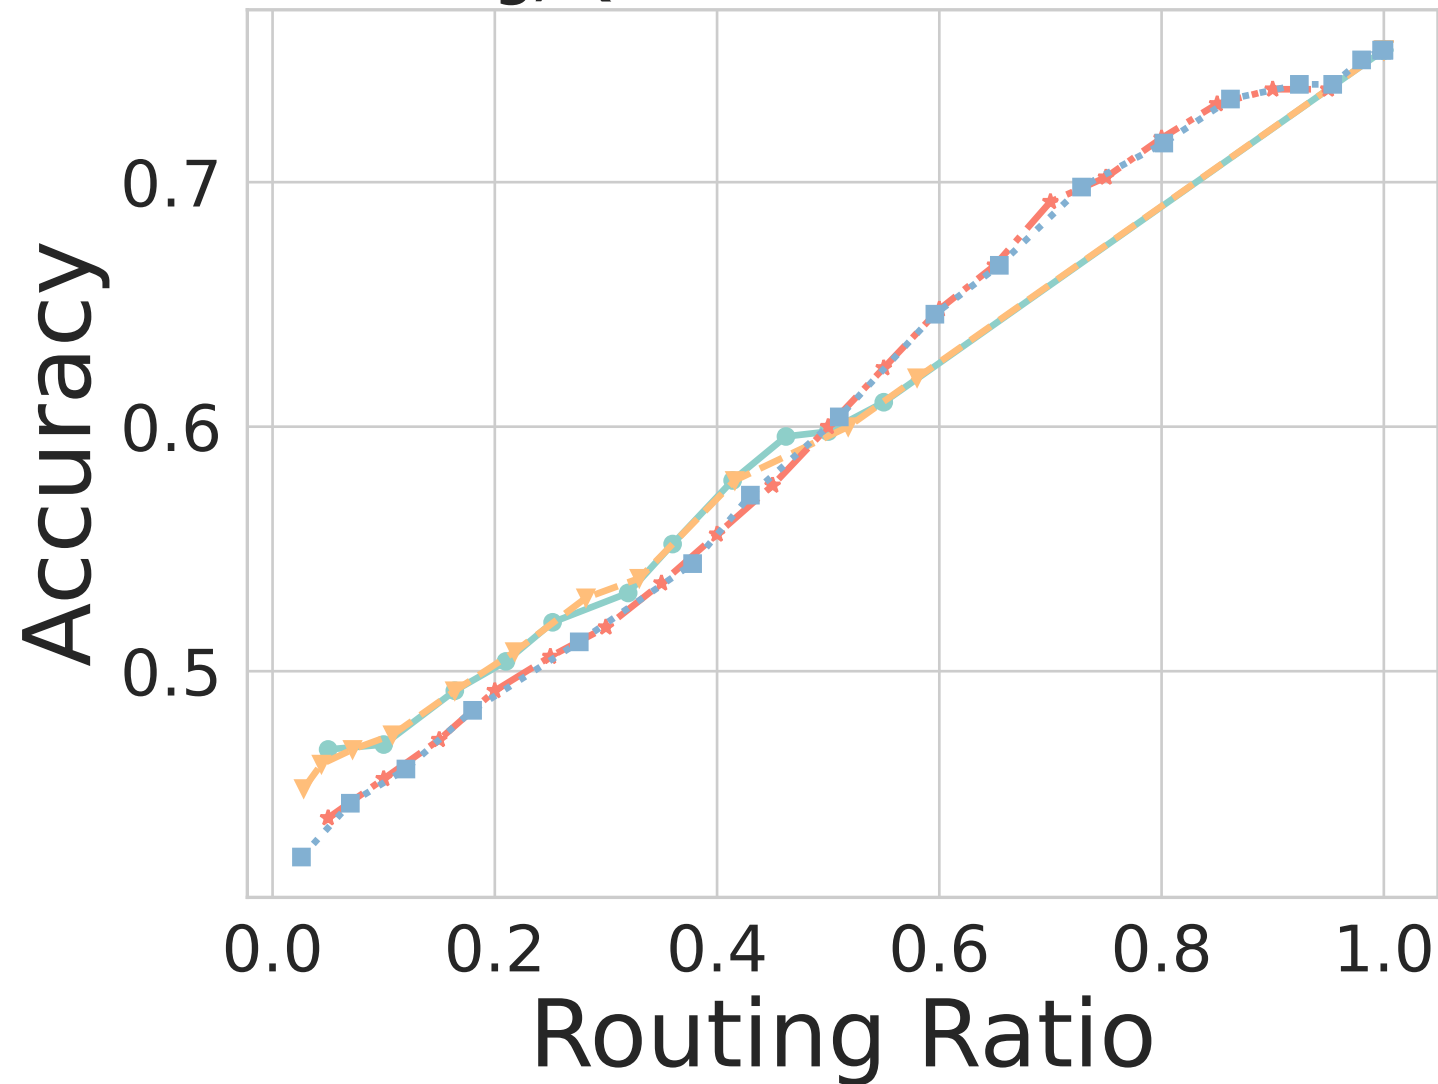

Supplement: supplementary_material [file cali_down_hellaswag_Qwen3-0.6B_meta-llama_Llama-3.1-70B-Instruct.pdf › Routing_SLM_LLMs/Proxy_routing_prediction/to_meta-llama_Llama-3.1-70B-Instruct/hellaswag_as_downstream/cali_down_hellaswag_Qwen3-0.6B_meta-llama_Llama-3.1-70B-Instruct.pdf]

**HellaSwag, Qwen3-1.7B to Llama-3.1-70B**

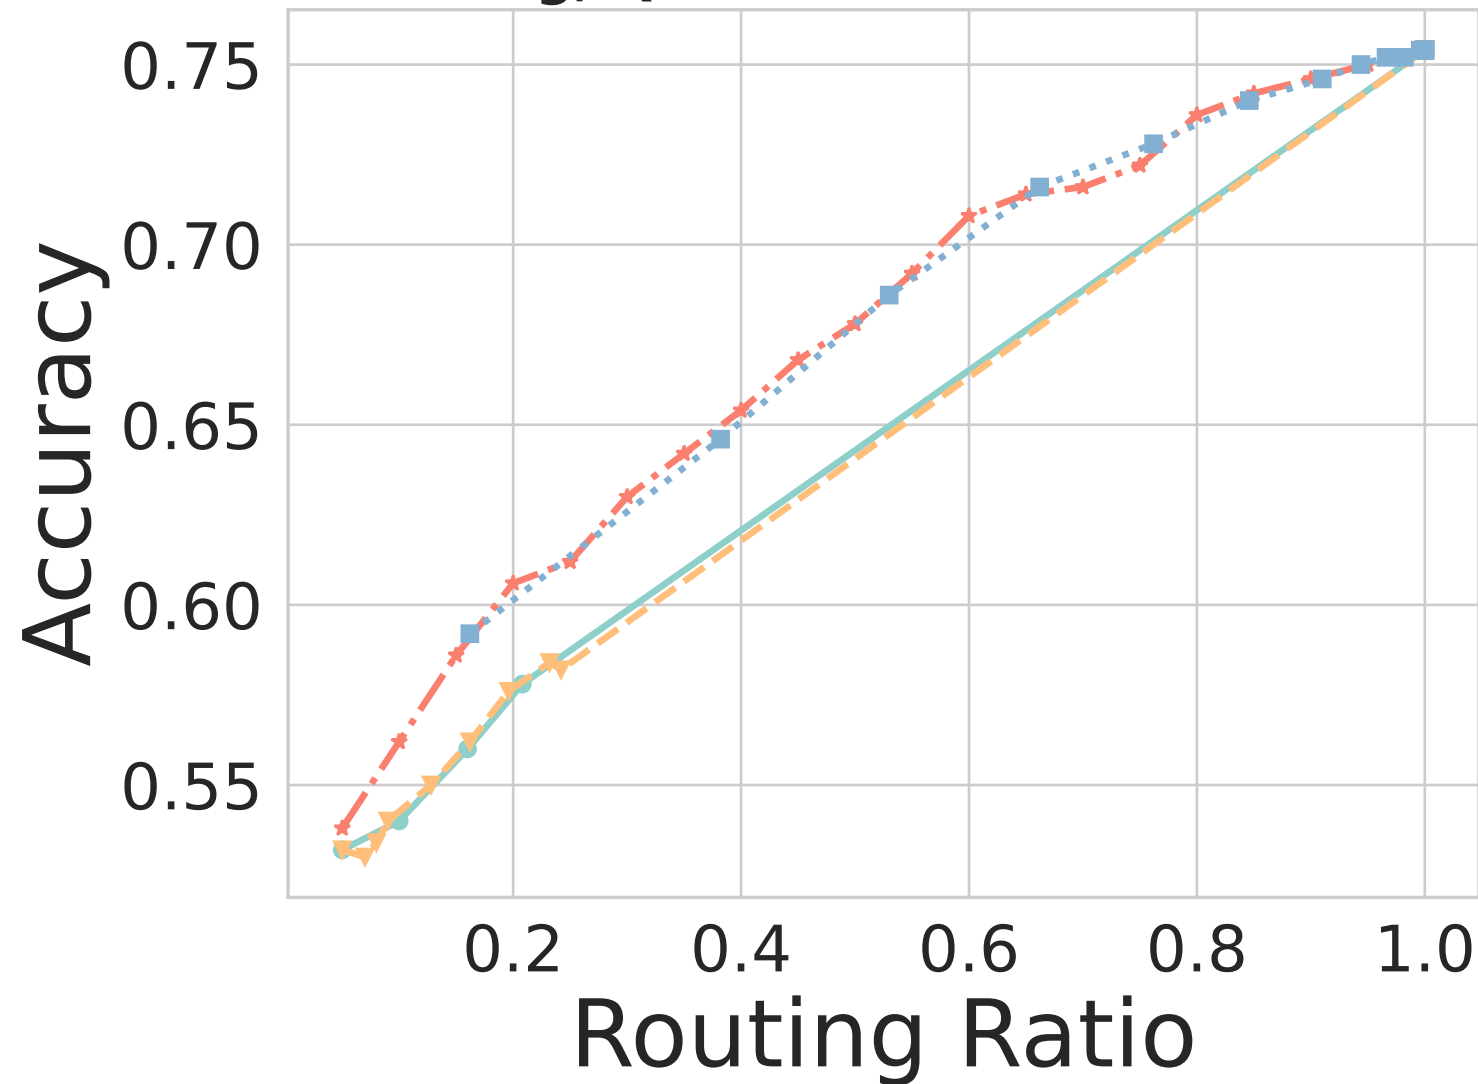

Supplement: supplementary_material [file cali_down_hellaswag_Qwen3-1.7B_meta-llama_Llama-3.1-70B-Instruct.pdf › Routing_SLM_LLMs/Proxy_routing_prediction/to_meta-llama_Llama-3.1-70B-Instruct/hellaswag_as_downstream/cali_down_hellaswag_Qwen3-1.7B_meta-llama_Llama-3.1-70B-Instruct.pdf]

**HellaSwag, Qwen3-4B to Llama-3.1-70B**

Accuracy

0.78

0.76

0.74

0.72

0.70

0.2

0.4

0.6

0.8

1.0

Routing Ratio

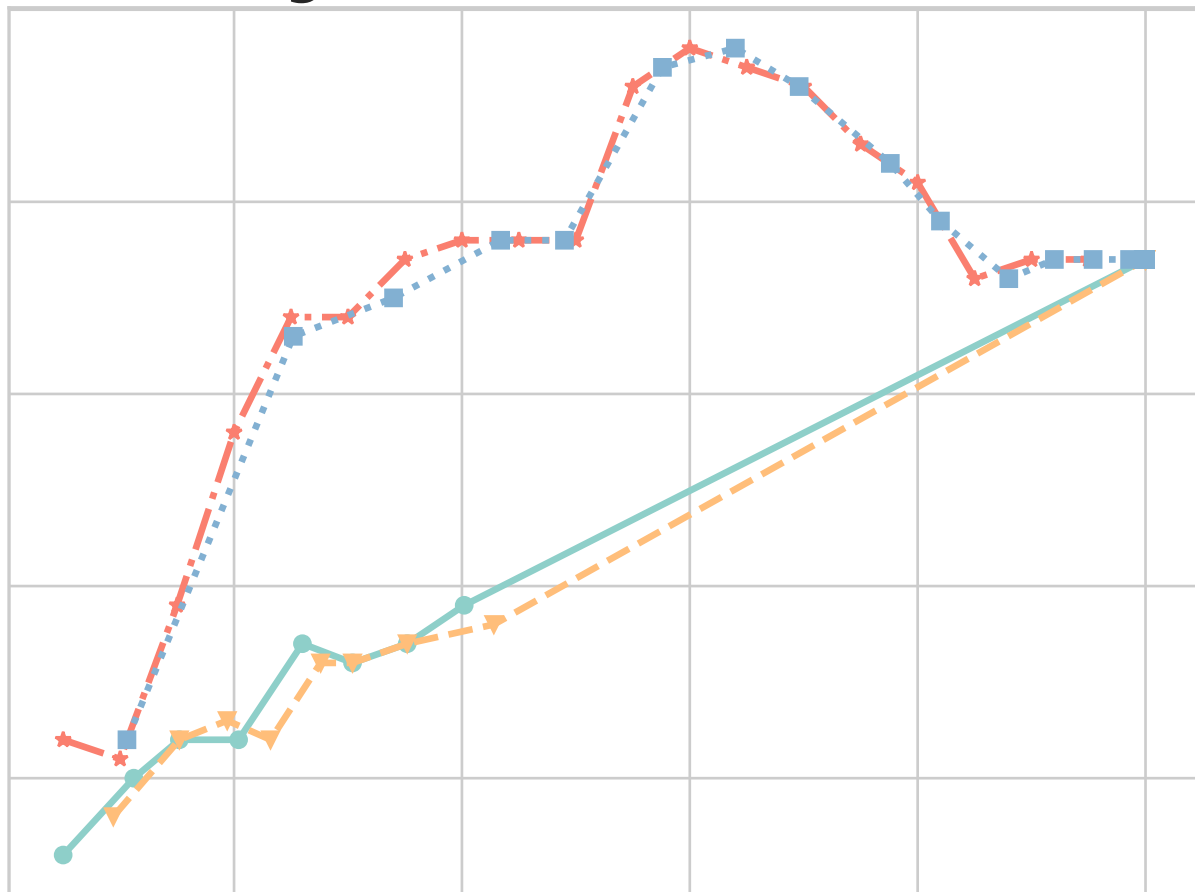

Supplement: supplementary_material [file cali_down_hellaswag_Qwen3-4B_meta-llama_Llama-3.1-70B-Instruct.pdf › Routing_SLM_LLMs/Proxy_routing_prediction/to_meta-llama_Llama-3.1-70B-Instruct/hellaswag_as_downstream/cali_down_hellaswag_Qwen3-4B_meta-llama_Llama-3.1-70B-Instruct.pdf]

**HellaSwag, granite-3.1-8b to Llama-3.1-70B**

Accuracy

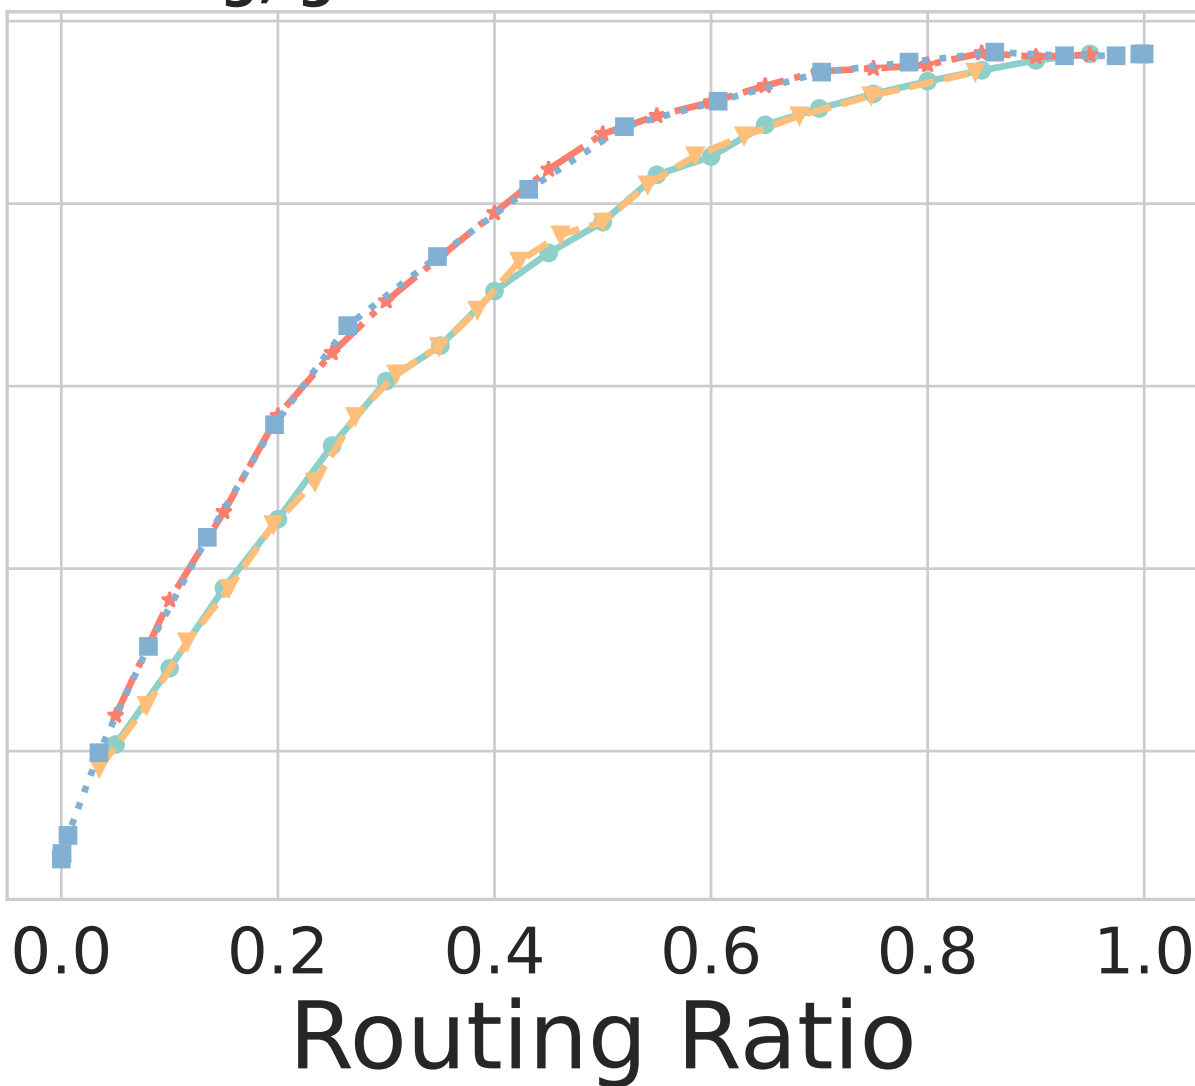

Supplement: supplementary_material [file cali_down_hellaswag_granite-3.1-8b_meta-llama_Llama-3.1-70B-Instruct.pdf › Routing_SLM_LLMs/Proxy_routing_prediction/to_meta-llama_Llama-3.1-70B-Instruct/hellaswag_as_downstream/cali_down_hellaswag_granite-3.1-8b_meta-llama_Llama-3.1-70B-Instruct.pdf]

**HellaSwag, llama-3.1-8b to Llama-3.1-70B**

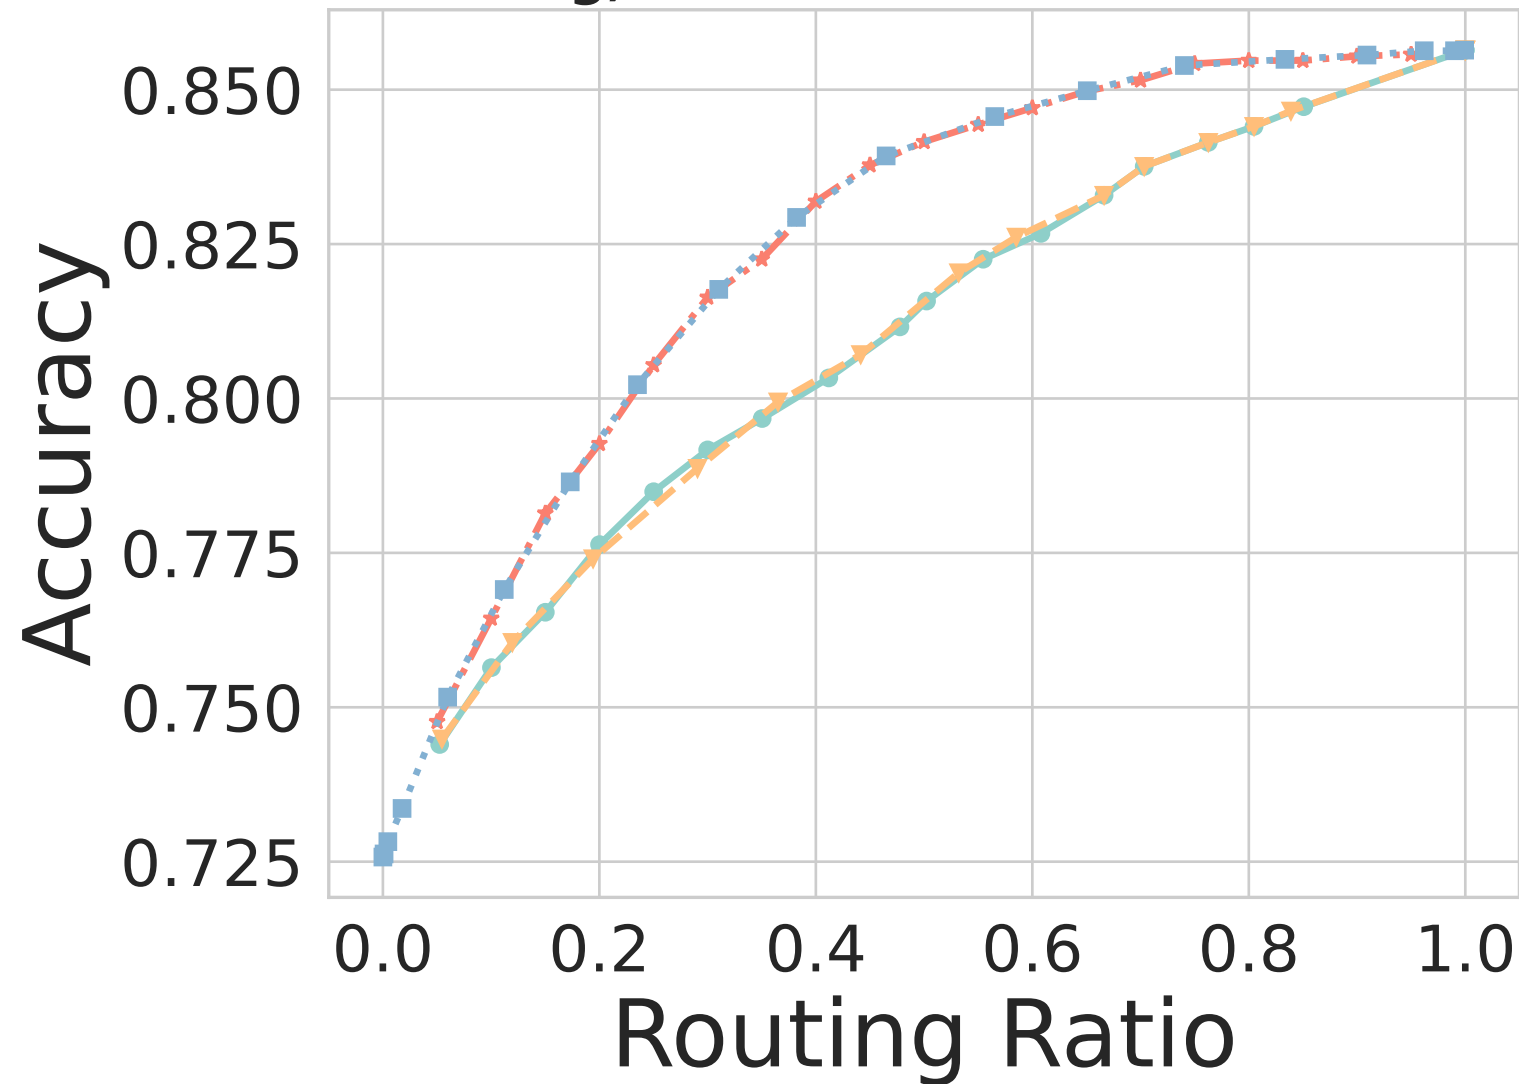

Supplement: supplementary_material [file cali_down_hellaswag_llama-3.1-8b_meta-llama_Llama-3.1-70B-Instruct.pdf › Routing_SLM_LLMs/Proxy_routing_prediction/to_meta-llama_Llama-3.1-70B-Instruct/hellaswag_as_downstream/cali_down_hellaswag_llama-3.1-8b_meta-llama_Llama-3.1-70B-Instruct.pdf]

# HellaSwag, llama-3.2-1b to Llama-3.1-70B

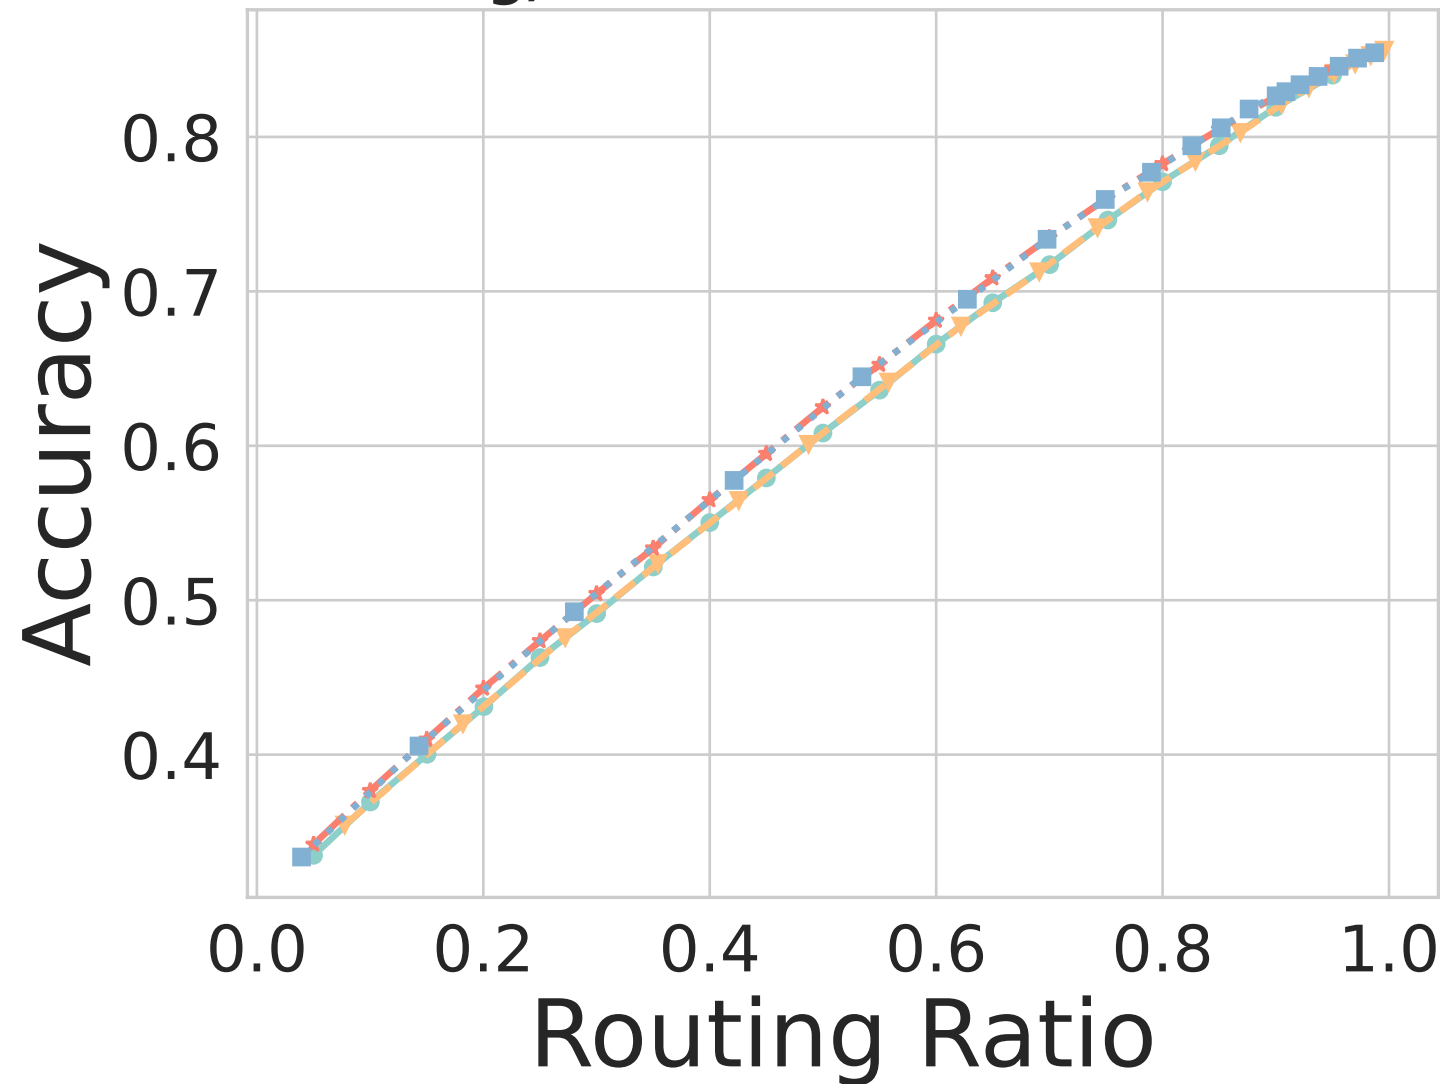

Supplement: supplementary_material [file cali_down_hellaswag_llama-3.2-1b_meta-llama_Llama-3.1-70B-Instruct.pdf › Routing_SLM_LLMs/Proxy_routing_prediction/to_meta-llama_Llama-3.1-70B-Instruct/hellaswag_as_downstream/cali_down_hellaswag_llama-3.2-1b_meta-llama_Llama-3.1-70B-Instruct.pdf]

**HellaSwag, llama-3.2-3b to Llama-3.1-70B**

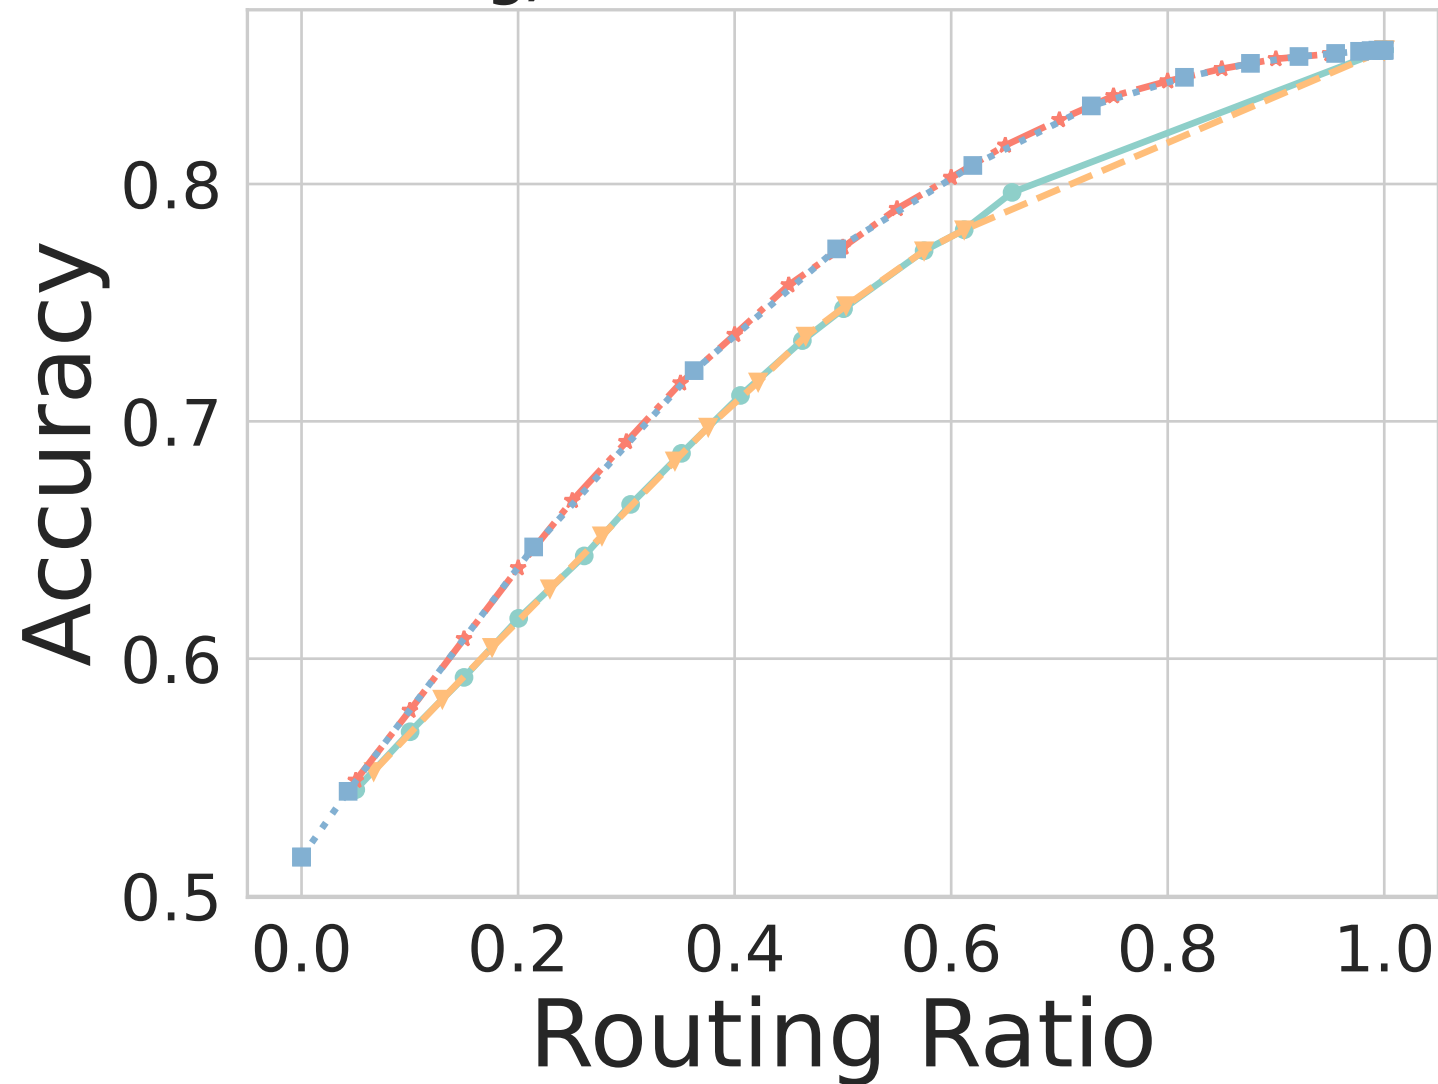

Supplement: supplementary_material [file cali_down_hellaswag_llama-3.2-3b_meta-llama_Llama-3.1-70B-Instruct.pdf › Routing_SLM_LLMs/Proxy_routing_prediction/to_meta-llama_Llama-3.1-70B-Instruct/hellaswag_as_downstream/cali_down_hellaswag_llama-3.2-3b_meta-llama_Llama-3.1-70B-Instruct.pdf]

**HellaSwag, mistral-7b to Llama-3.1-70B**

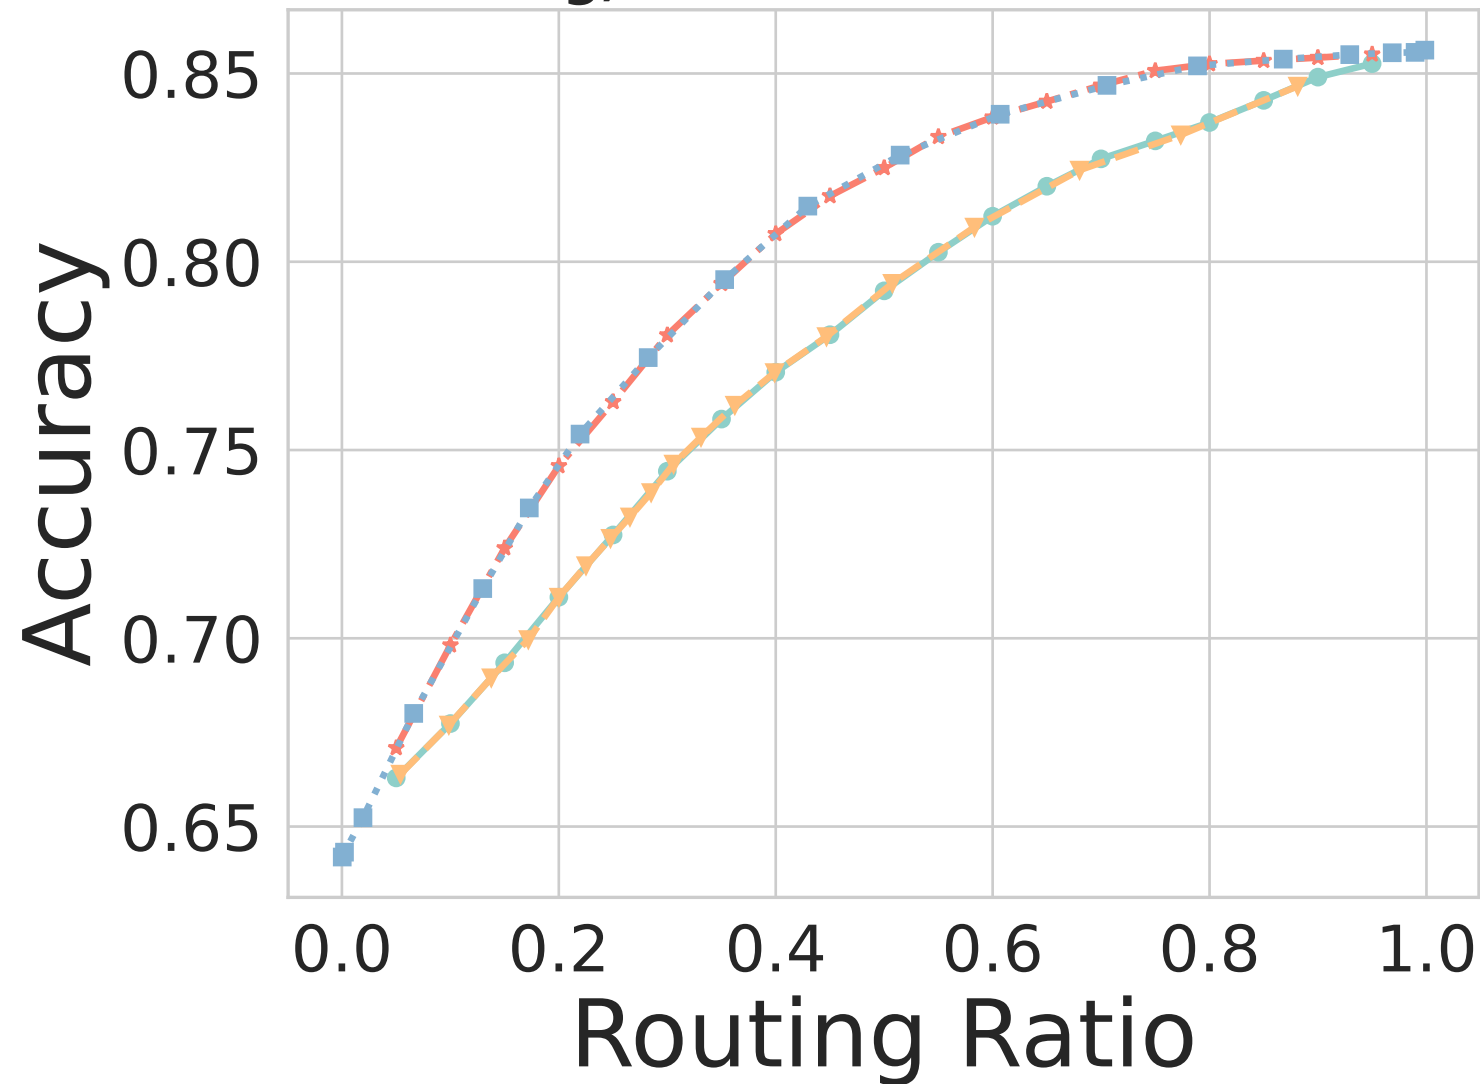

Supplement: supplementary_material [file cali_down_hellaswag_mistral-7b_meta-llama_Llama-3.1-70B-Instruct.pdf › Routing_SLM_LLMs/Proxy_routing_prediction/to_meta-llama_Llama-3.1-70B-Instruct/hellaswag_as_downstream/cali_down_hellaswag_mistral-7b_meta-llama_Llama-3.1-70B-Instruct.pdf]

**HellaSwag, phi-3.5-mini to Llama-3.1-70B**

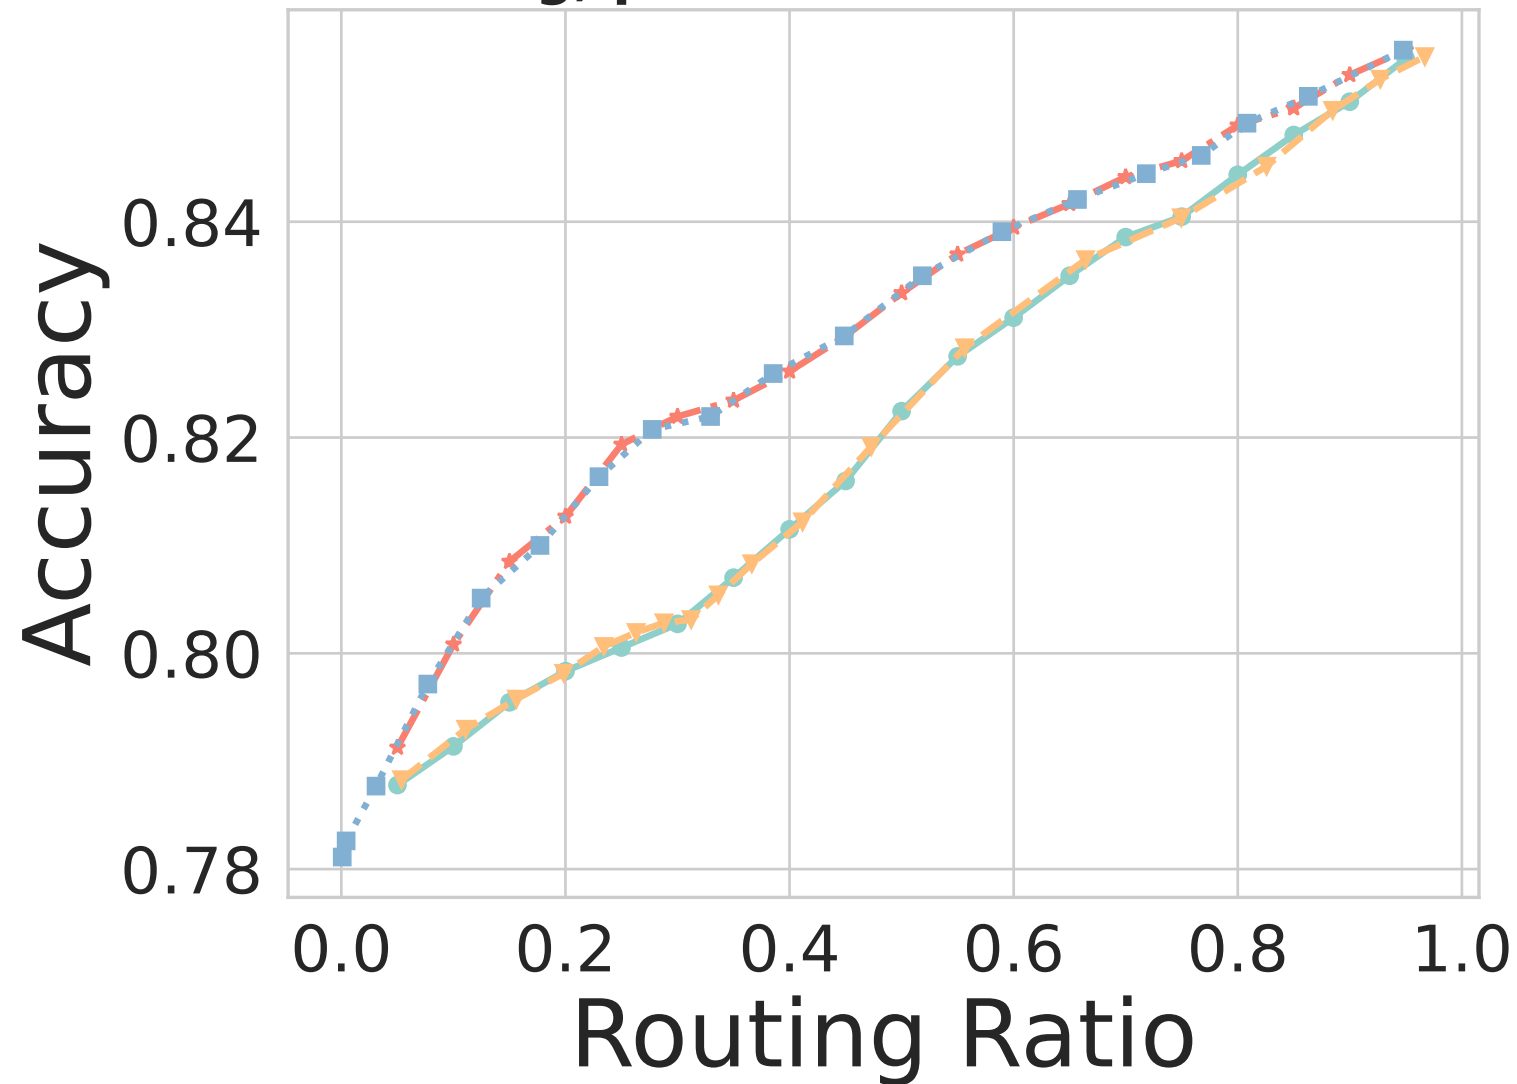

Supplement: supplementary_material [file cali_down_hellaswag_phi-3.5-mini_meta-llama_Llama-3.1-70B-Instruct.pdf › Routing_SLM_LLMs/Proxy_routing_prediction/to_meta-llama_Llama-3.1-70B-Instruct/hellaswag_as_downstream/cali_down_hellaswag_phi-3.5-mini_meta-llama_Llama-3.1-70B-Instruct.pdf]

**HellaSwag, phi-4-mini-reasoning to Llama-3.1-70B**

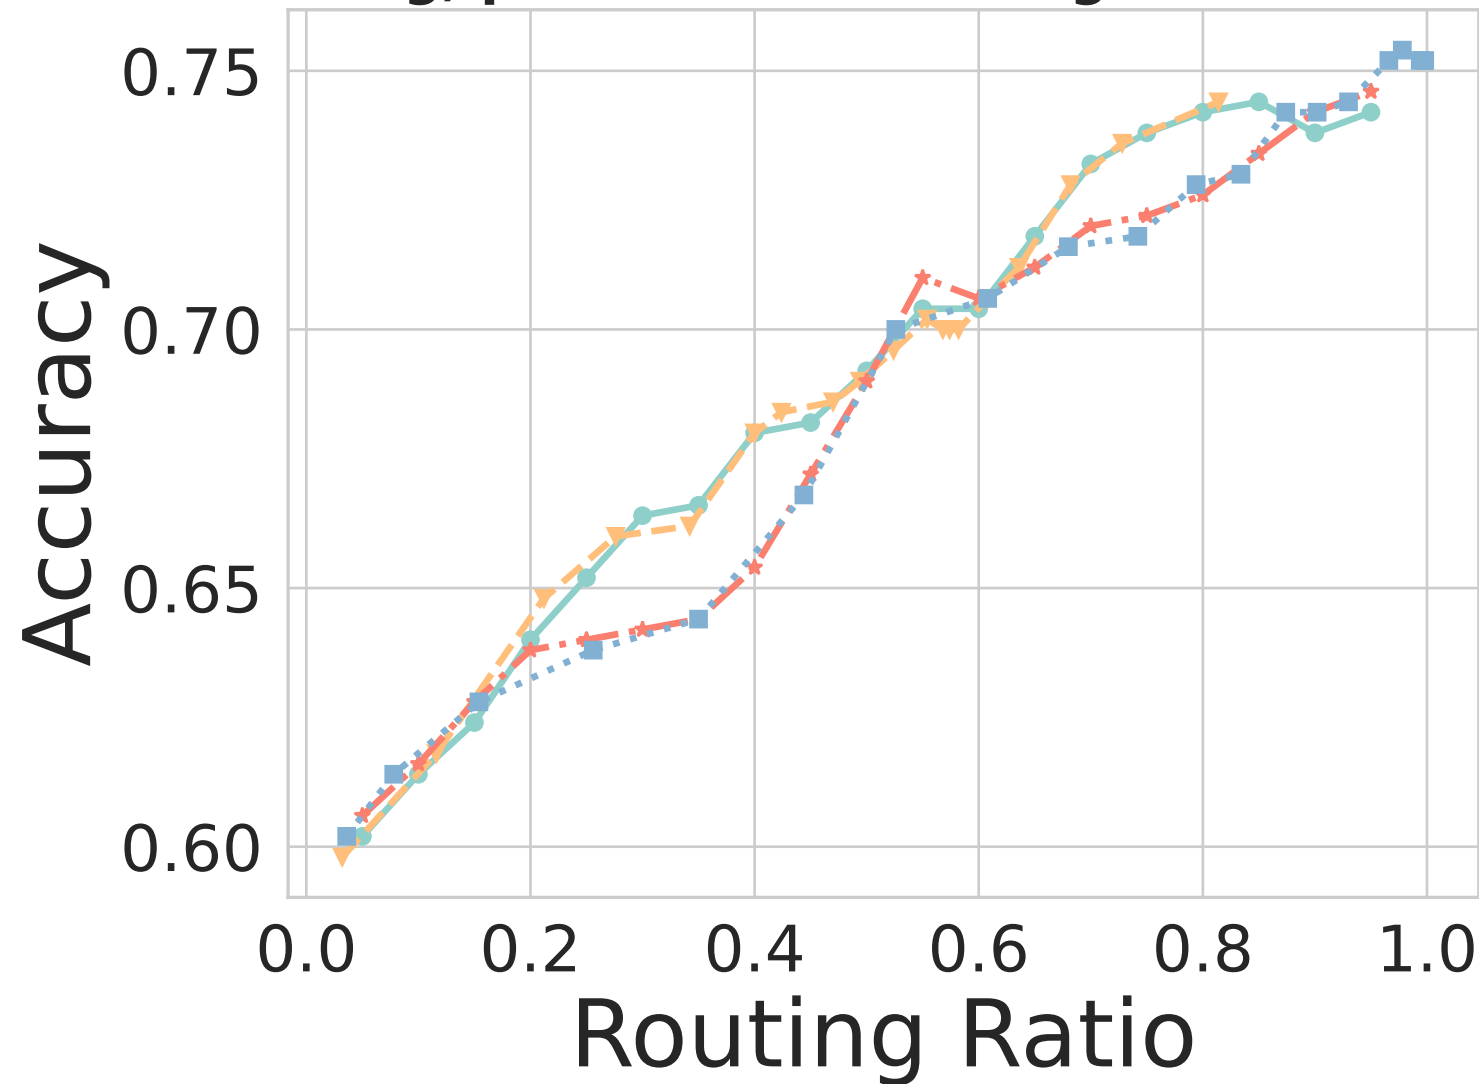

Supplement: supplementary_material [file cali_down_hellaswag_phi-4-mini-reasoning_meta-llama_Llama-3.1-70B-Instruct.pdf › Routing_SLM_LLMs/Proxy_routing_prediction/to_meta-llama_Llama-3.1-70B-Instruct/hellaswag_as_downstream/cali_down_hellaswag_phi-4-mini-reasoning_meta-llama_Llama-3.1-70B-Instruct.pdf]

**HellaSwag, qwen-2.5-7b to Llama-3.1-70B**

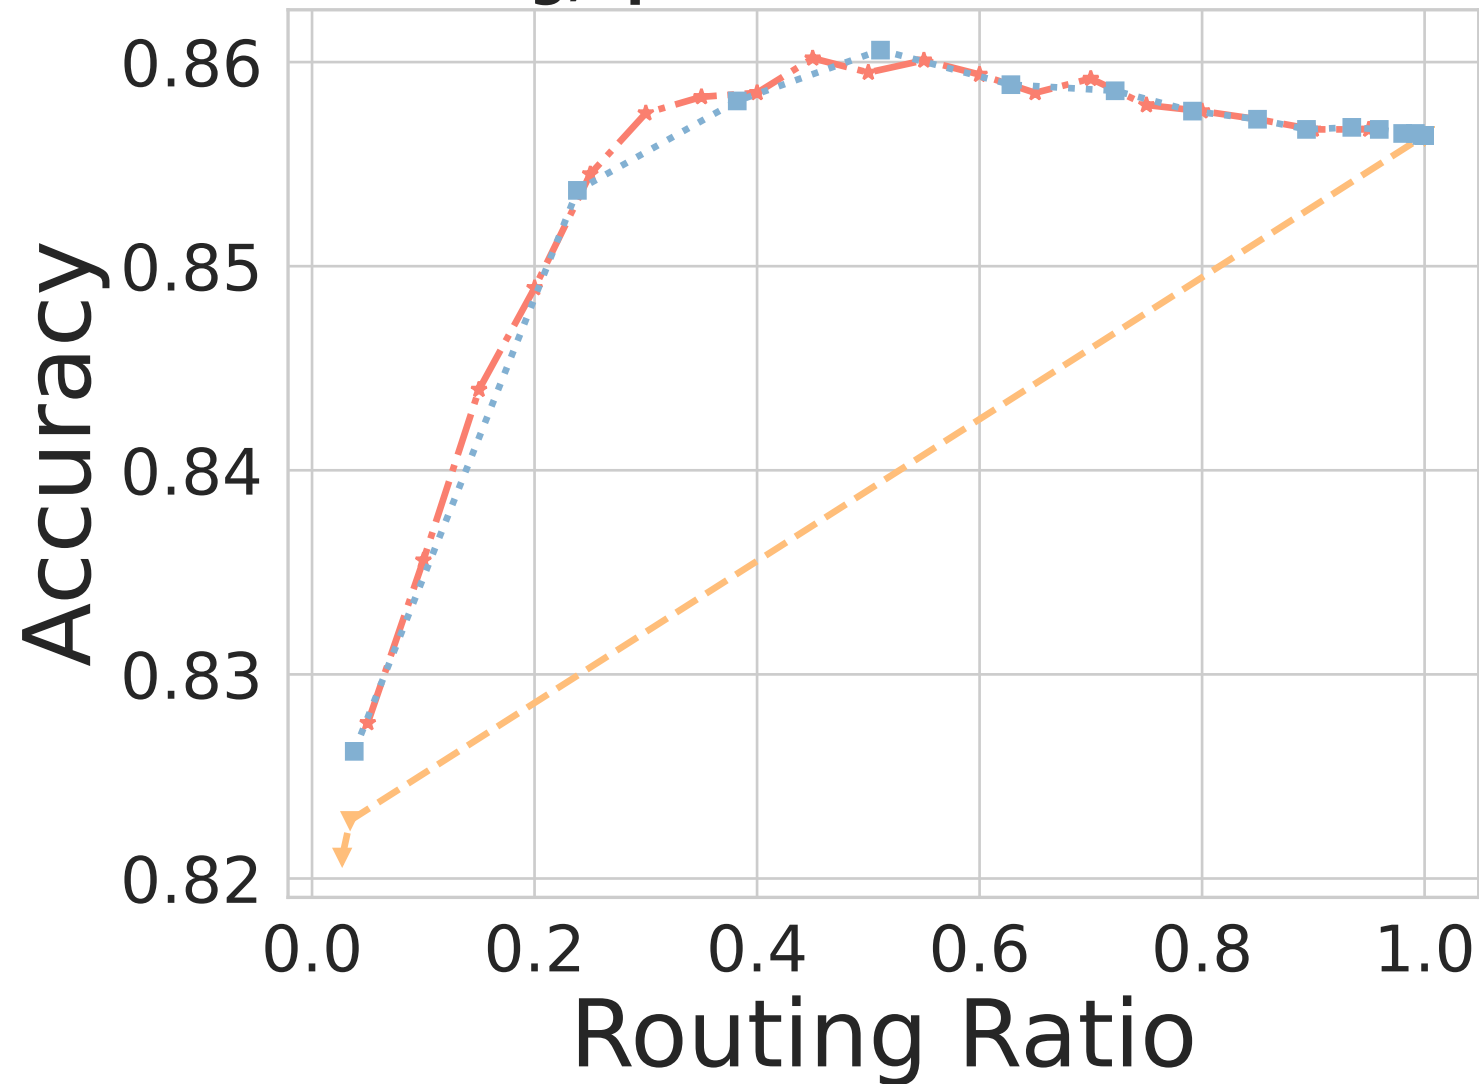

Supplement: supplementary_material [file cali_down_hellaswag_qwen-2.5-7b_meta-llama_Llama-3.1-70B-Instruct.pdf › Routing_SLM_LLMs/Proxy_routing_prediction/to_meta-llama_Llama-3.1-70B-Instruct/hellaswag_as_downstream/cali_down_hellaswag_qwen-2.5-7b_meta-llama_Llama-3.1-70B-Instruct.pdf]

**HellaSwag, rwkv to Llama-3.1-70B**

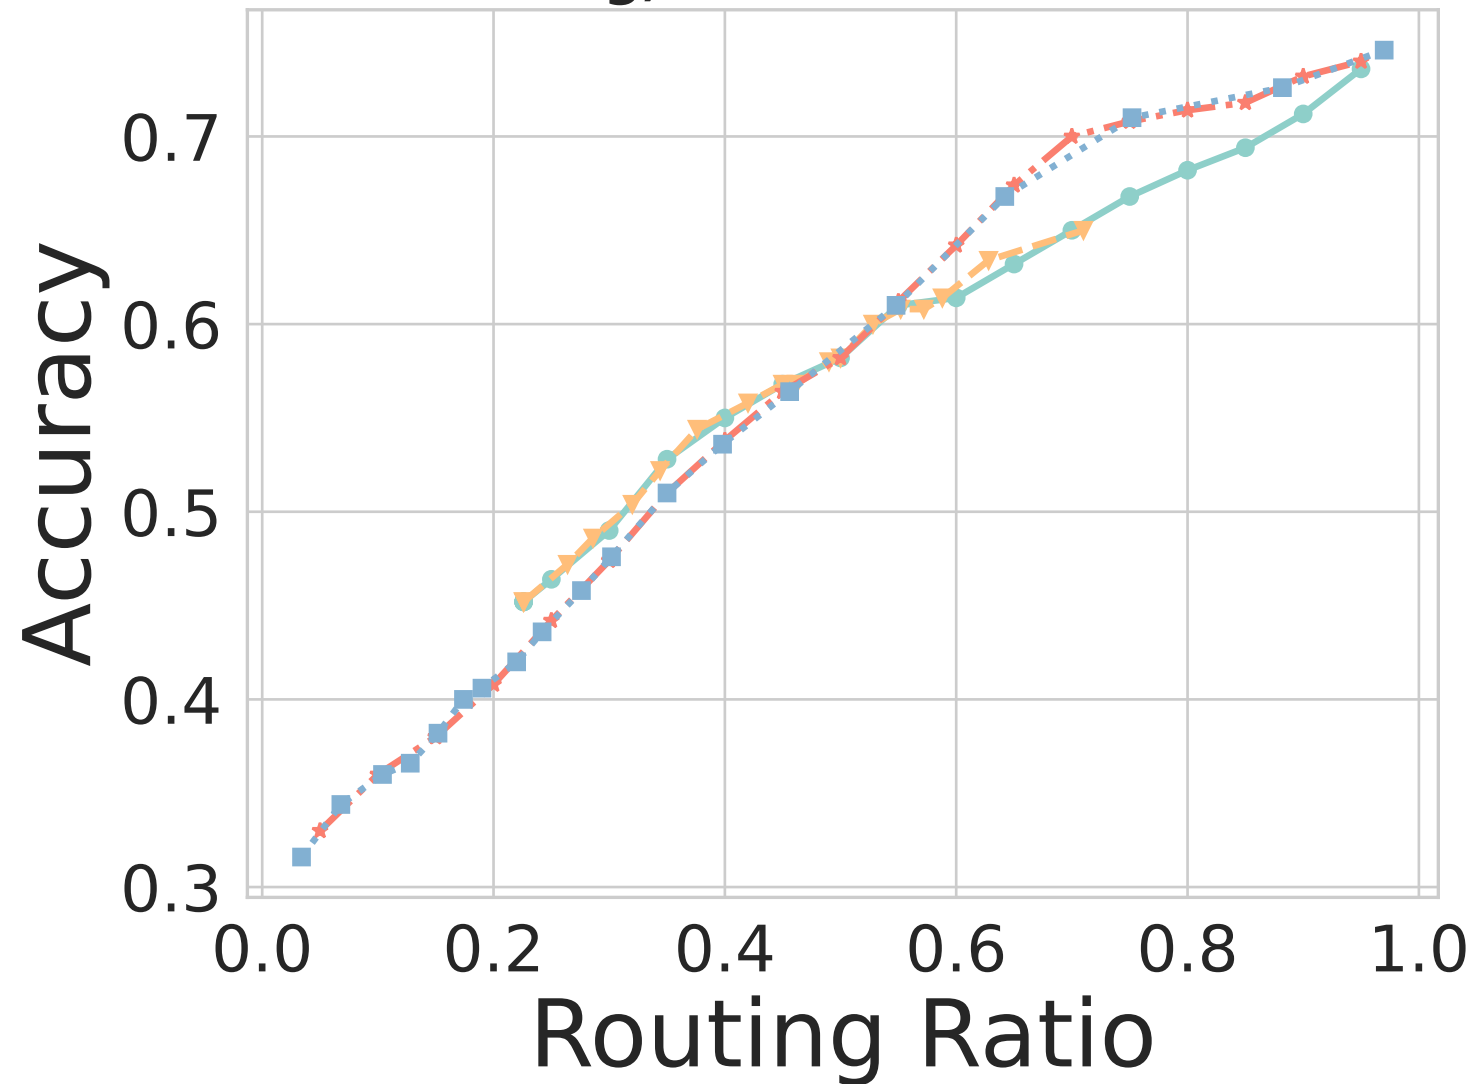

Supplement: supplementary_material [file cali_down_hellaswag_rwkv_meta-llama_Llama-3.1-70B-Instruct.pdf › Routing_SLM_LLMs/Proxy_routing_prediction/to_meta-llama_Llama-3.1-70B-Instruct/hellaswag_as_downstream/cali_down_hellaswag_rwkv_meta-llama_Llama-3.1-70B-Instruct.pdf]

**MATH-500, Qwen3-0.6B to Llama-3.1-70B**

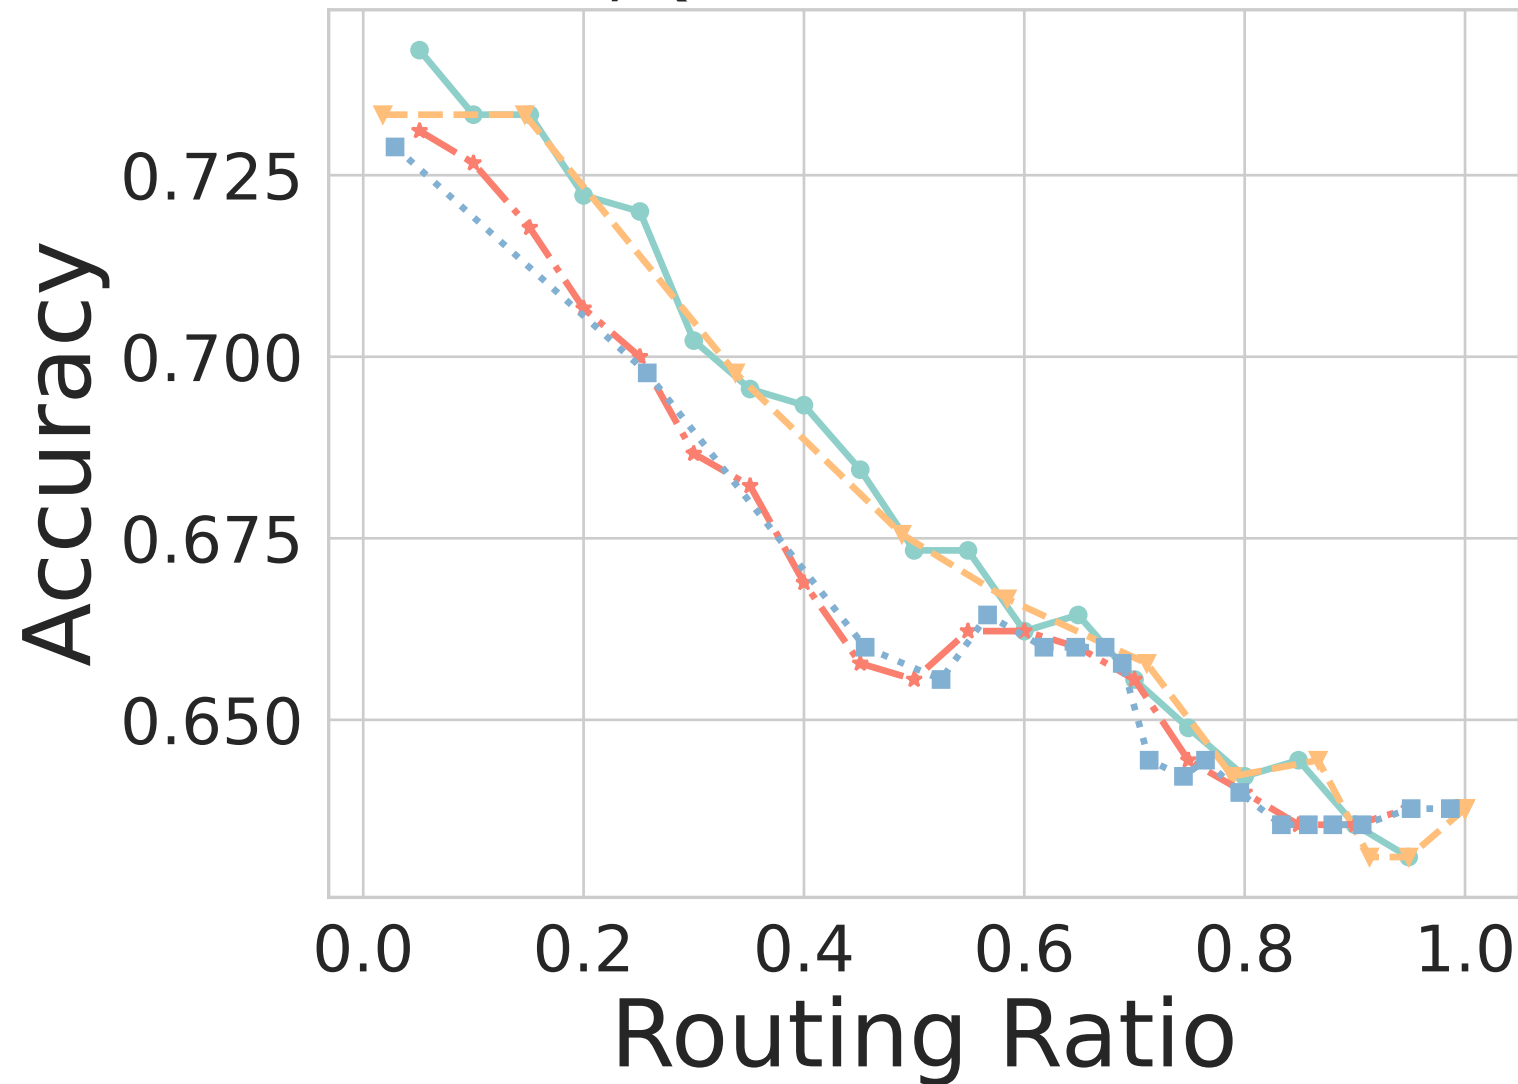

Supplement: supplementary_material [file cali_down_math_500_Qwen3-0.6B_meta-llama_Llama-3.1-70B-Instruct.pdf › Routing_SLM_LLMs/Proxy_routing_prediction/to_meta-llama_Llama-3.1-70B-Instruct/math_500_as_downstream/cali_down_math_500_Qwen3-0.6B_meta-llama_Llama-3.1-70B-Instruct.pdf]

**MATH-500, Qwen3-1.7B to Llama-3.1-70B**

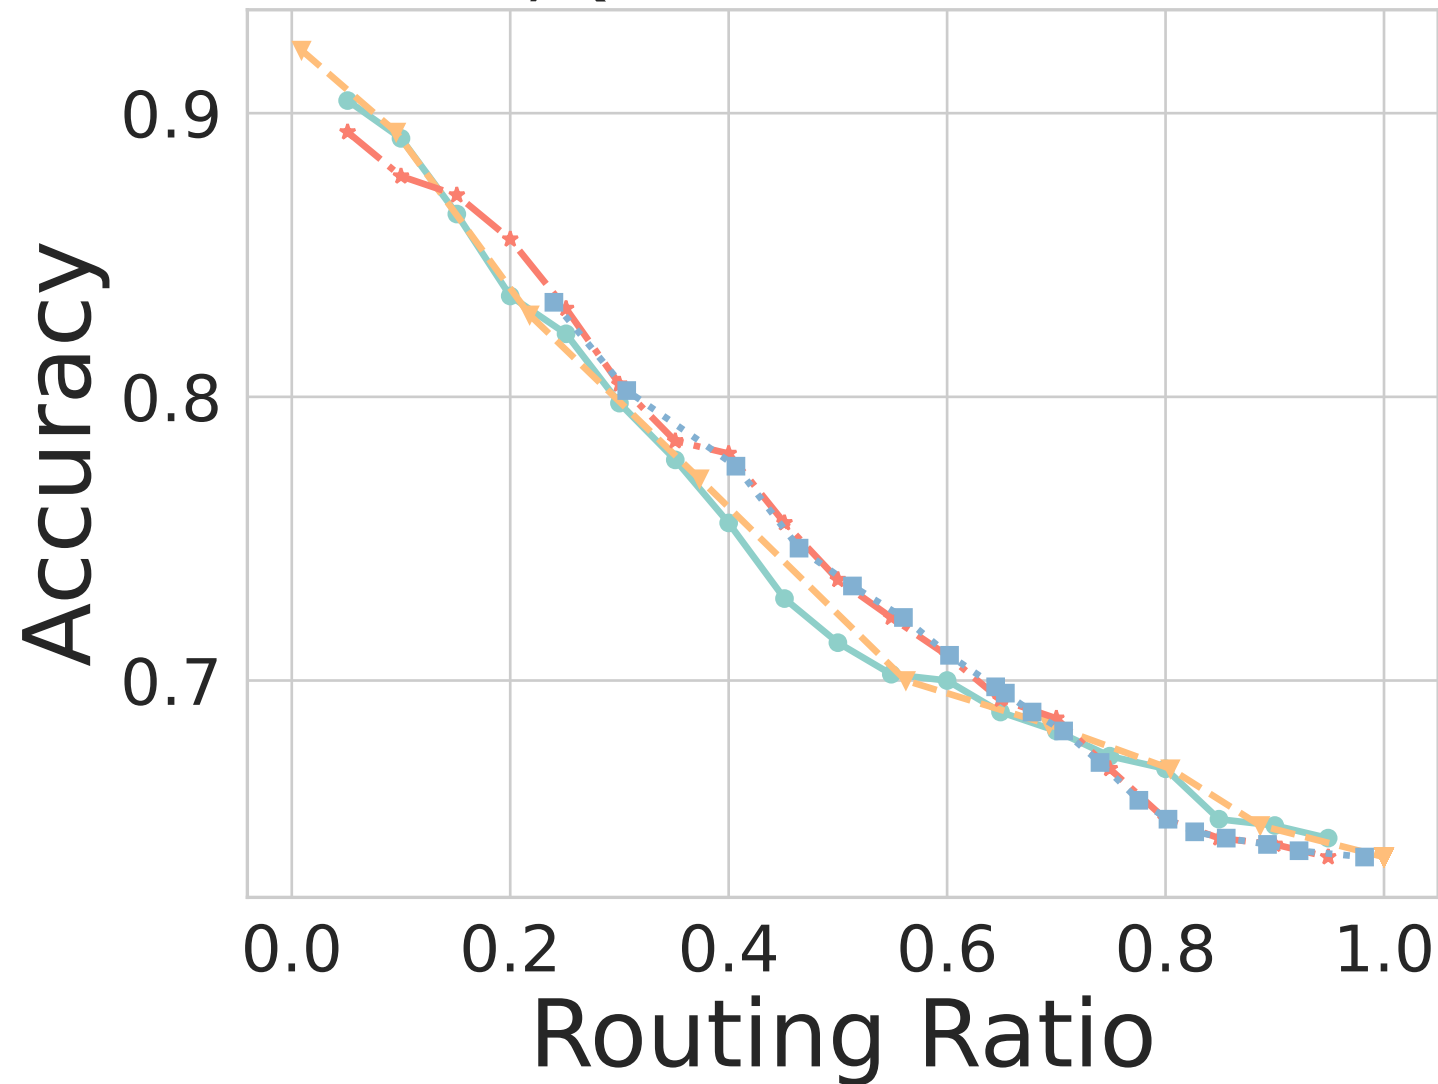

Supplement: supplementary_material [file cali_down_math_500_Qwen3-1.7B_meta-llama_Llama-3.1-70B-Instruct.pdf › Routing_SLM_LLMs/Proxy_routing_prediction/to_meta-llama_Llama-3.1-70B-Instruct/math_500_as_downstream/cali_down_math_500_Qwen3-1.7B_meta-llama_Llama-3.1-70B-Instruct.pdf]

**MATH-500, Qwen3-4B to Llama-3.1-70B**

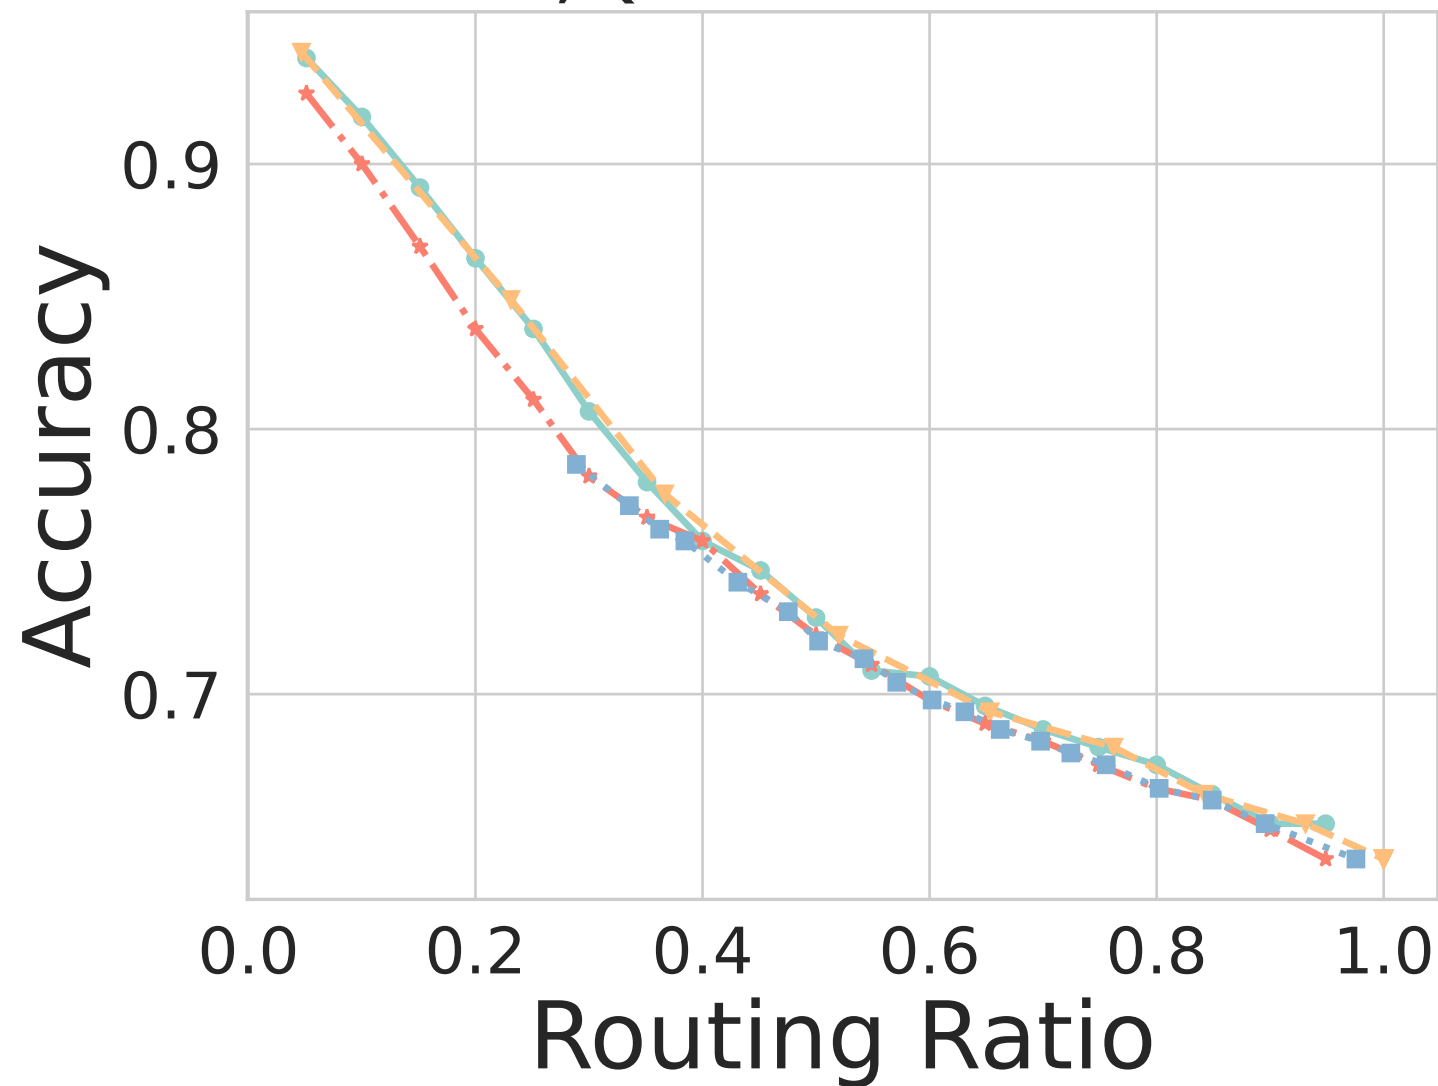

Supplement: supplementary_material [file cali_down_math_500_Qwen3-4B_meta-llama_Llama-3.1-70B-Instruct.pdf › Routing_SLM_LLMs/Proxy_routing_prediction/to_meta-llama_Llama-3.1-70B-Instruct/math_500_as_downstream/cali_down_math_500_Qwen3-4B_meta-llama_Llama-3.1-70B-Instruct.pdf]

**MATH-500, granite-3.1-8b to Llama-3.1-70B**

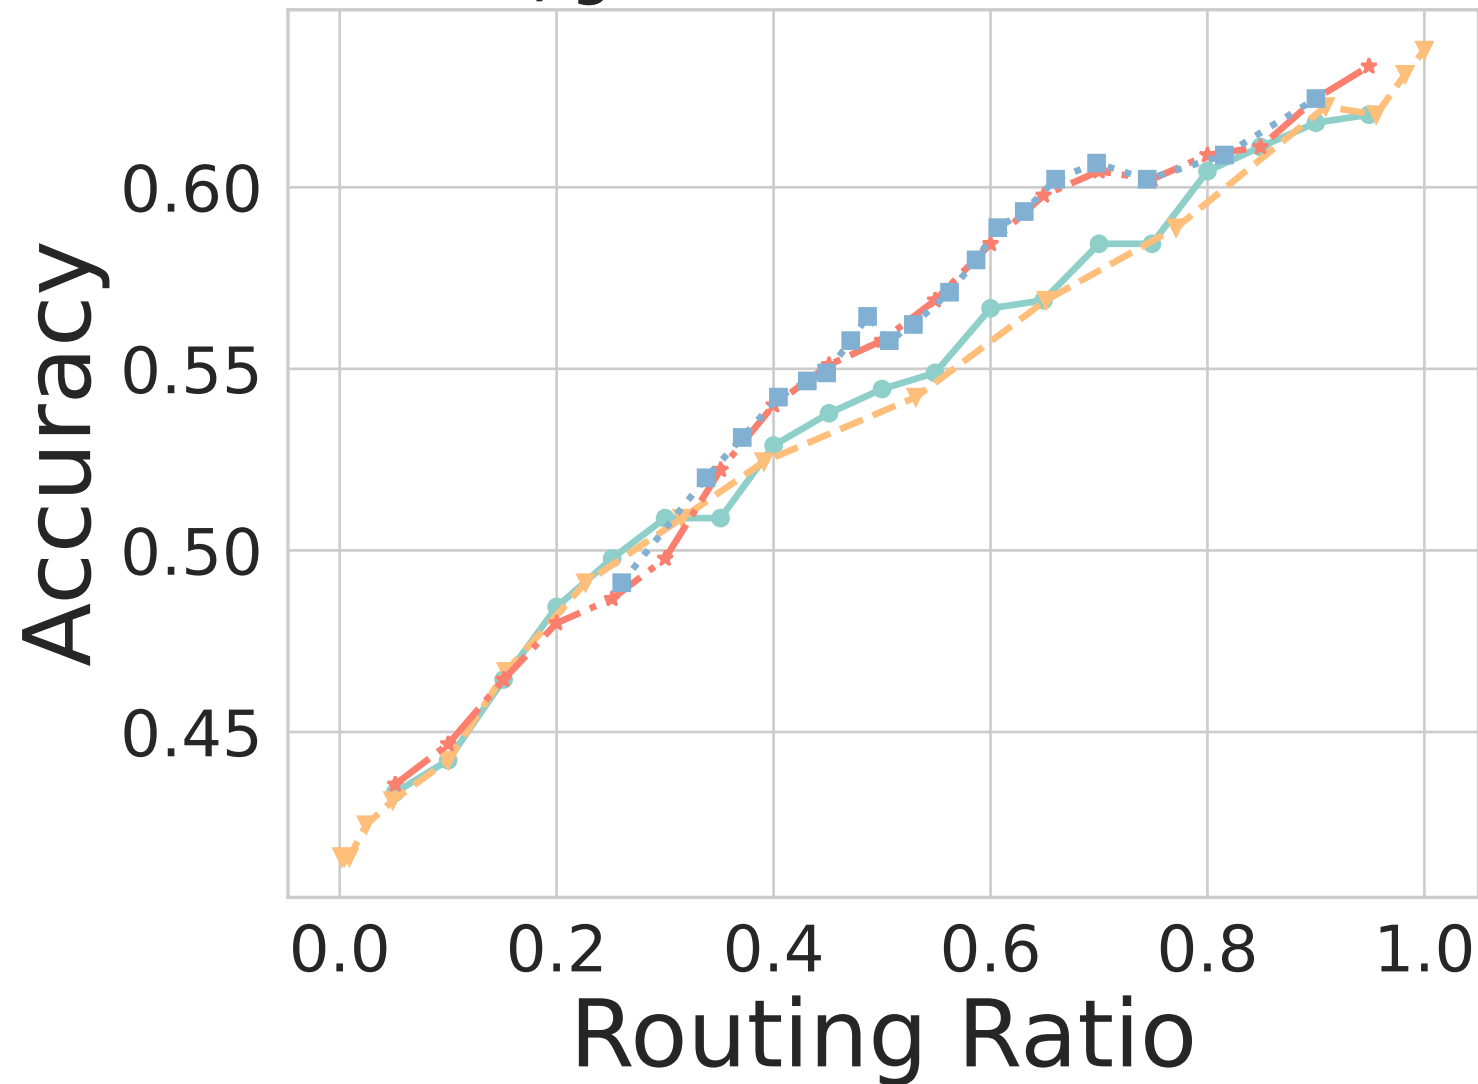

Supplement: supplementary_material [file cali_down_math_500_granite-3.1-8b_meta-llama_Llama-3.1-70B-Instruct.pdf › Routing_SLM_LLMs/Proxy_routing_prediction/to_meta-llama_Llama-3.1-70B-Instruct/math_500_as_downstream/cali_down_math_500_granite-3.1-8b_meta-llama_Llama-3.1-70B-Instruct.pdf]

**MATH-500, llama-3.1-8b to Llama-3.1-70B**

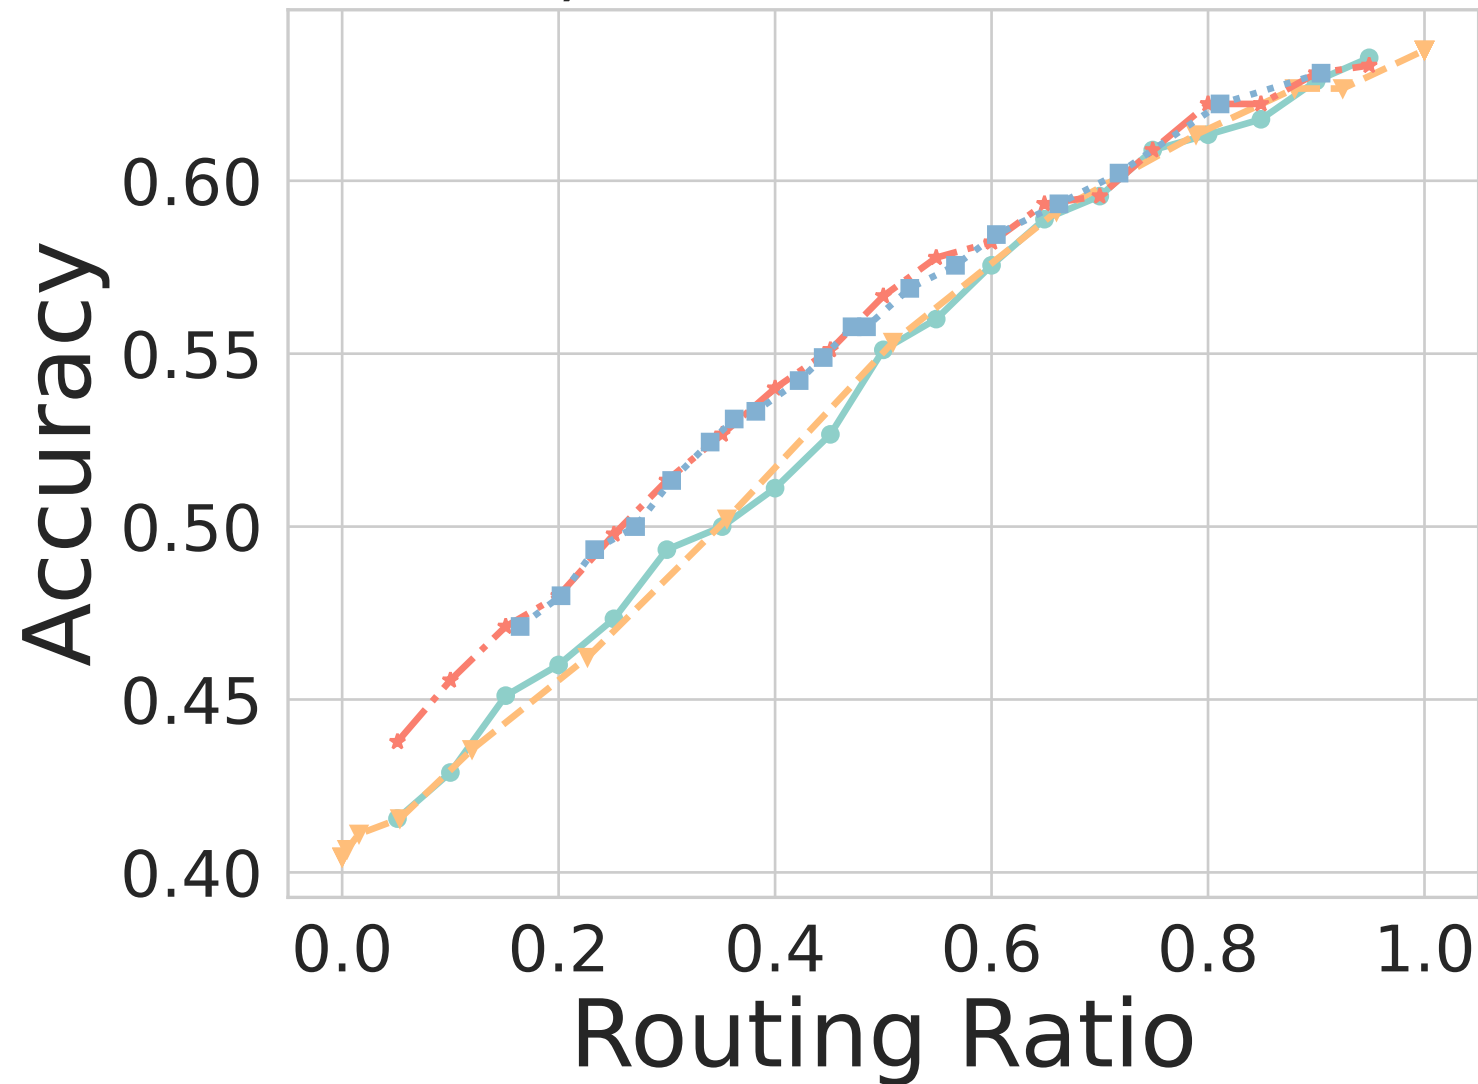

Supplement: supplementary_material [file cali_down_math_500_llama-3.1-8b_meta-llama_Llama-3.1-70B-Instruct.pdf › Routing_SLM_LLMs/Proxy_routing_prediction/to_meta-llama_Llama-3.1-70B-Instruct/math_500_as_downstream/cali_down_math_500_llama-3.1-8b_meta-llama_Llama-3.1-70B-Instruct.pdf]

**MATH-500, llama-3.2-1b to Llama-3.1-70B**

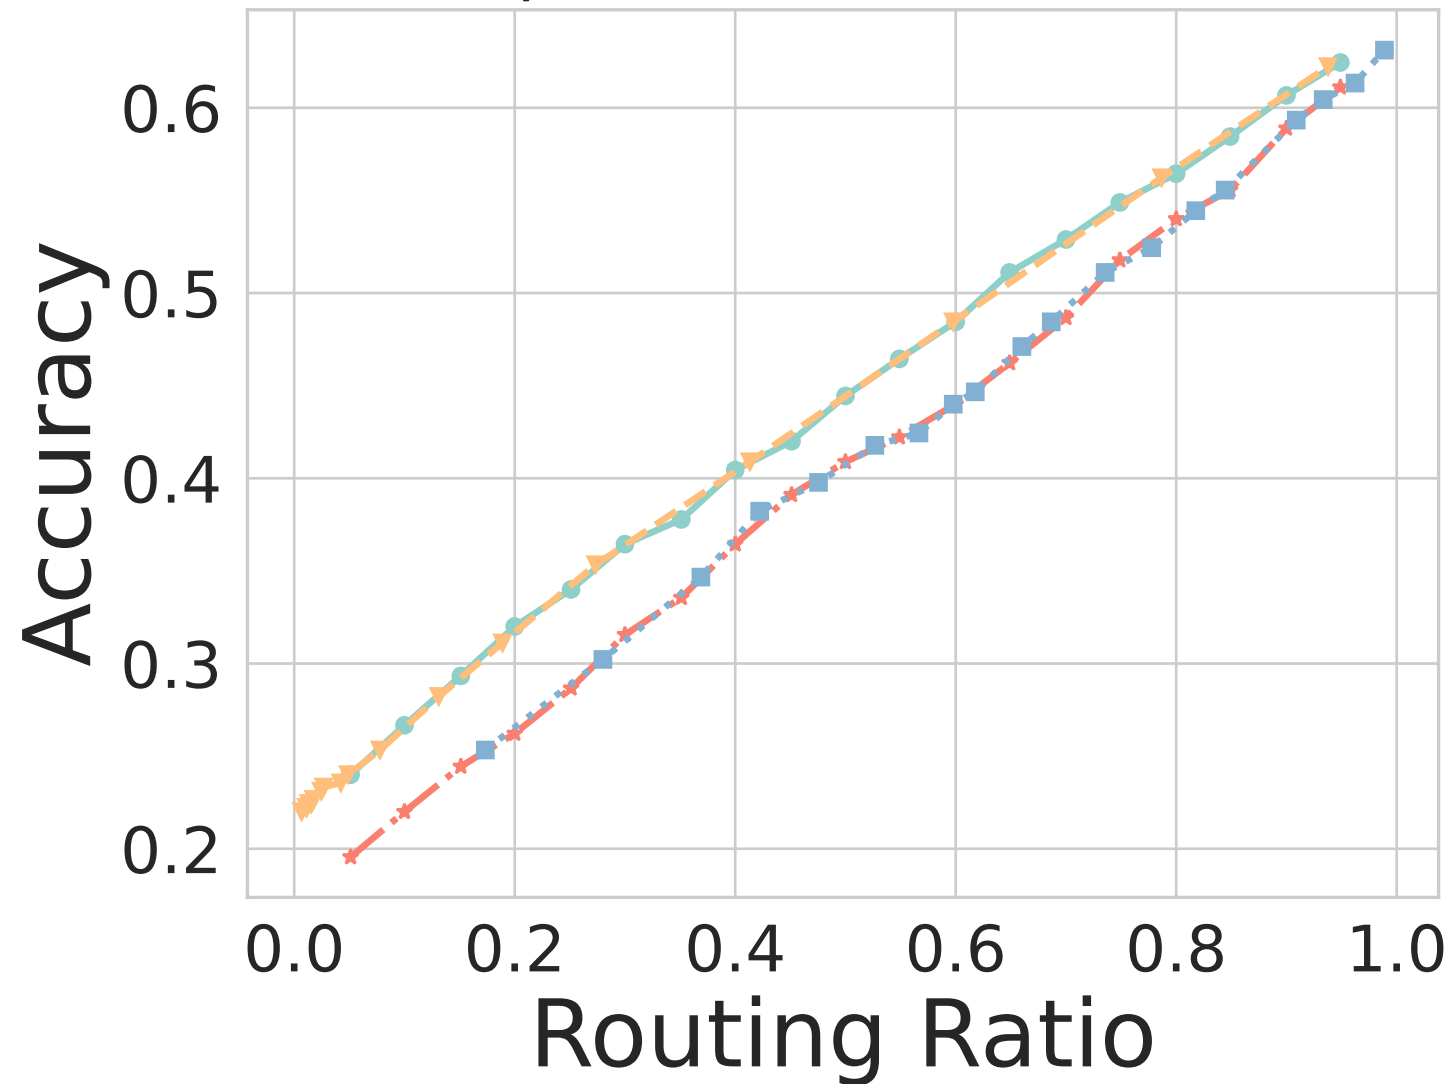

Supplement: supplementary_material [file cali_down_math_500_llama-3.2-1b_meta-llama_Llama-3.1-70B-Instruct.pdf › Routing_SLM_LLMs/Proxy_routing_prediction/to_meta-llama_Llama-3.1-70B-Instruct/math_500_as_downstream/cali_down_math_500_llama-3.2-1b_meta-llama_Llama-3.1-70B-Instruct.pdf]

**MATH-500, llama-3.2-3b to Llama-3.1-70B**

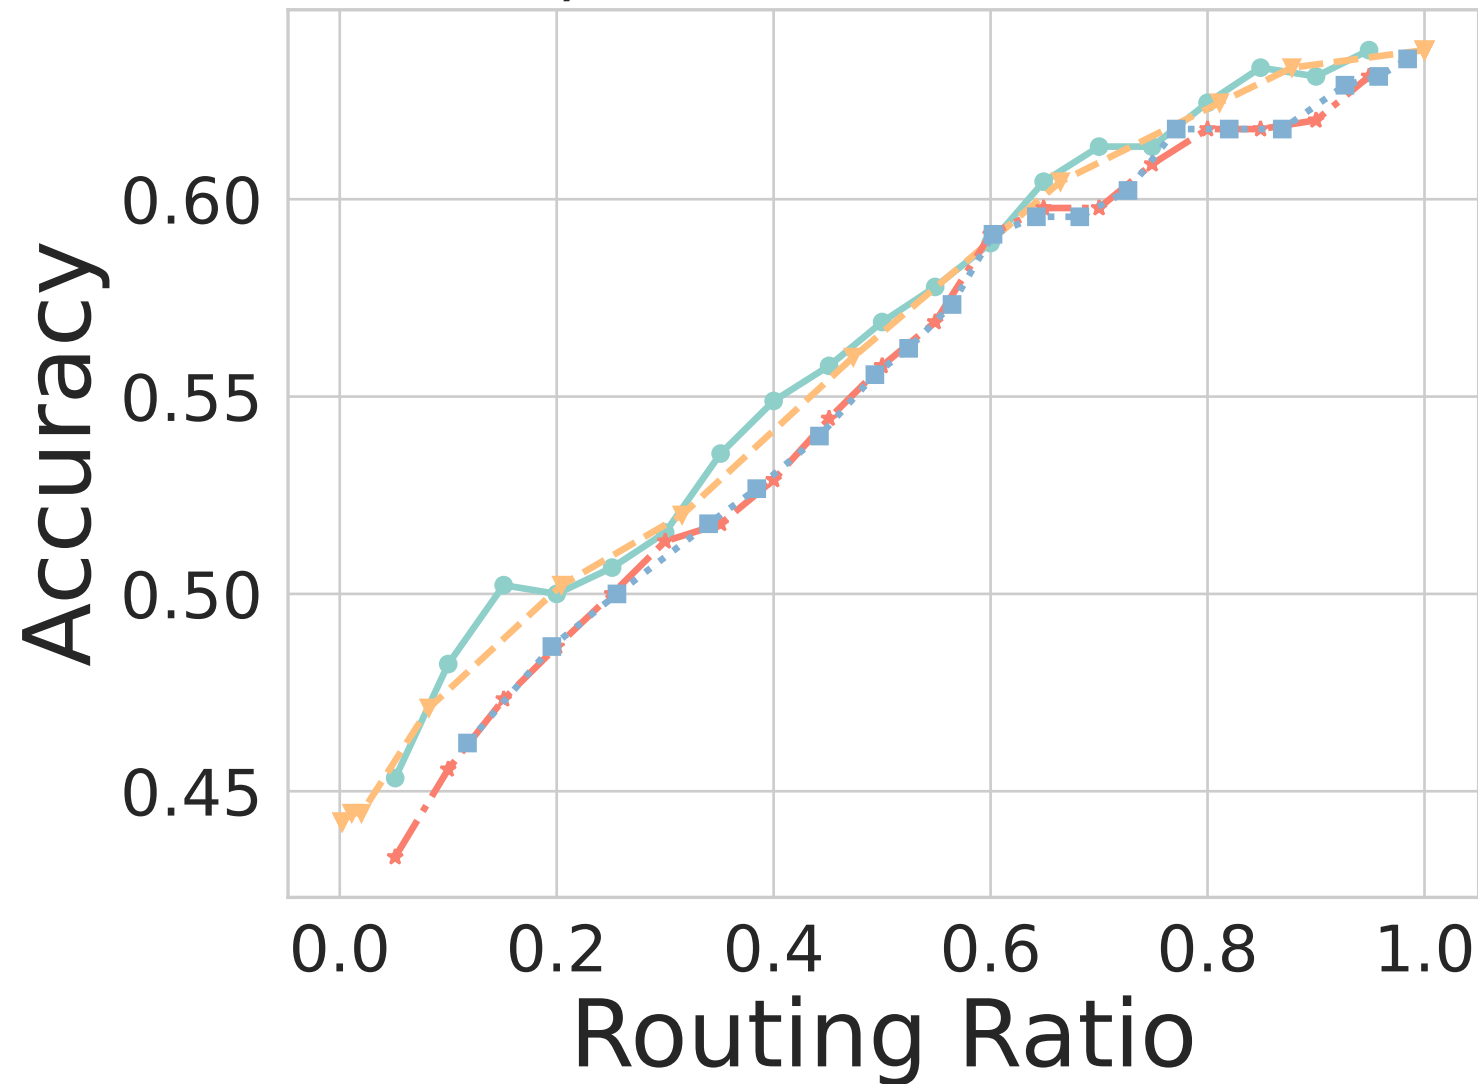

Supplement: supplementary_material [file cali_down_math_500_llama-3.2-3b_meta-llama_Llama-3.1-70B-Instruct.pdf › Routing_SLM_LLMs/Proxy_routing_prediction/to_meta-llama_Llama-3.1-70B-Instruct/math_500_as_downstream/cali_down_math_500_llama-3.2-3b_meta-llama_Llama-3.1-70B-Instruct.pdf]

**MATH-500, mistral-7b to Llama-3.1-70B**

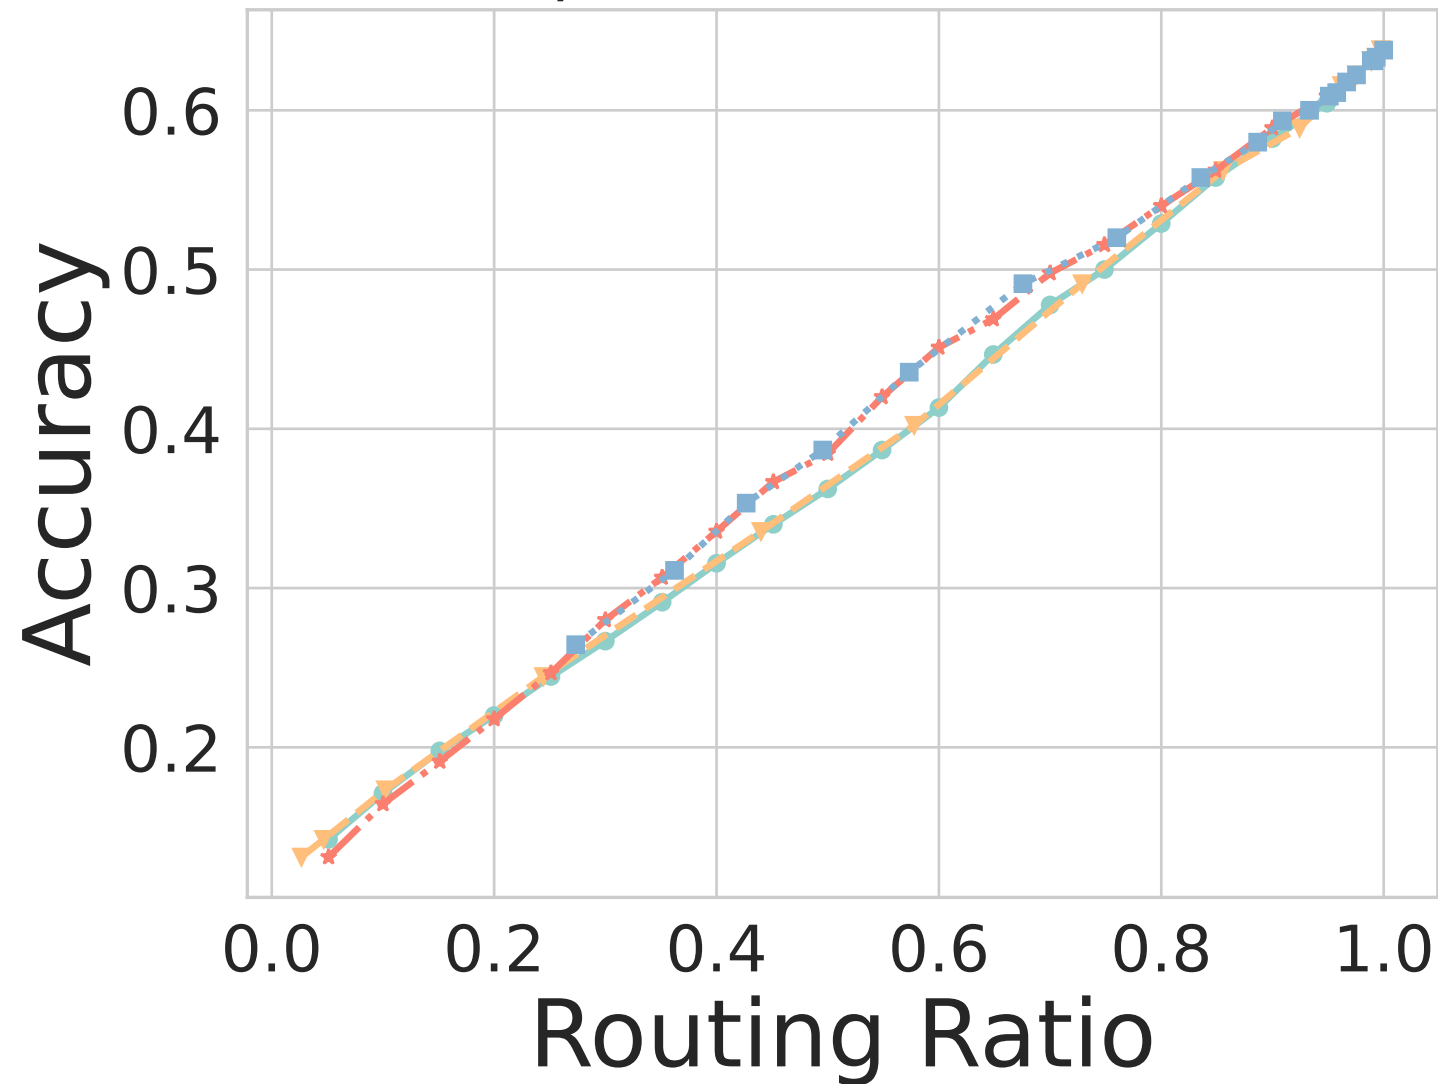

Supplement: supplementary_material [file cali_down_math_500_mistral-7b_meta-llama_Llama-3.1-70B-Instruct.pdf › Routing_SLM_LLMs/Proxy_routing_prediction/to_meta-llama_Llama-3.1-70B-Instruct/math_500_as_downstream/cali_down_math_500_mistral-7b_meta-llama_Llama-3.1-70B-Instruct.pdf]

**MATH-500, phi-3.5-mini to Llama-3.1-70B**

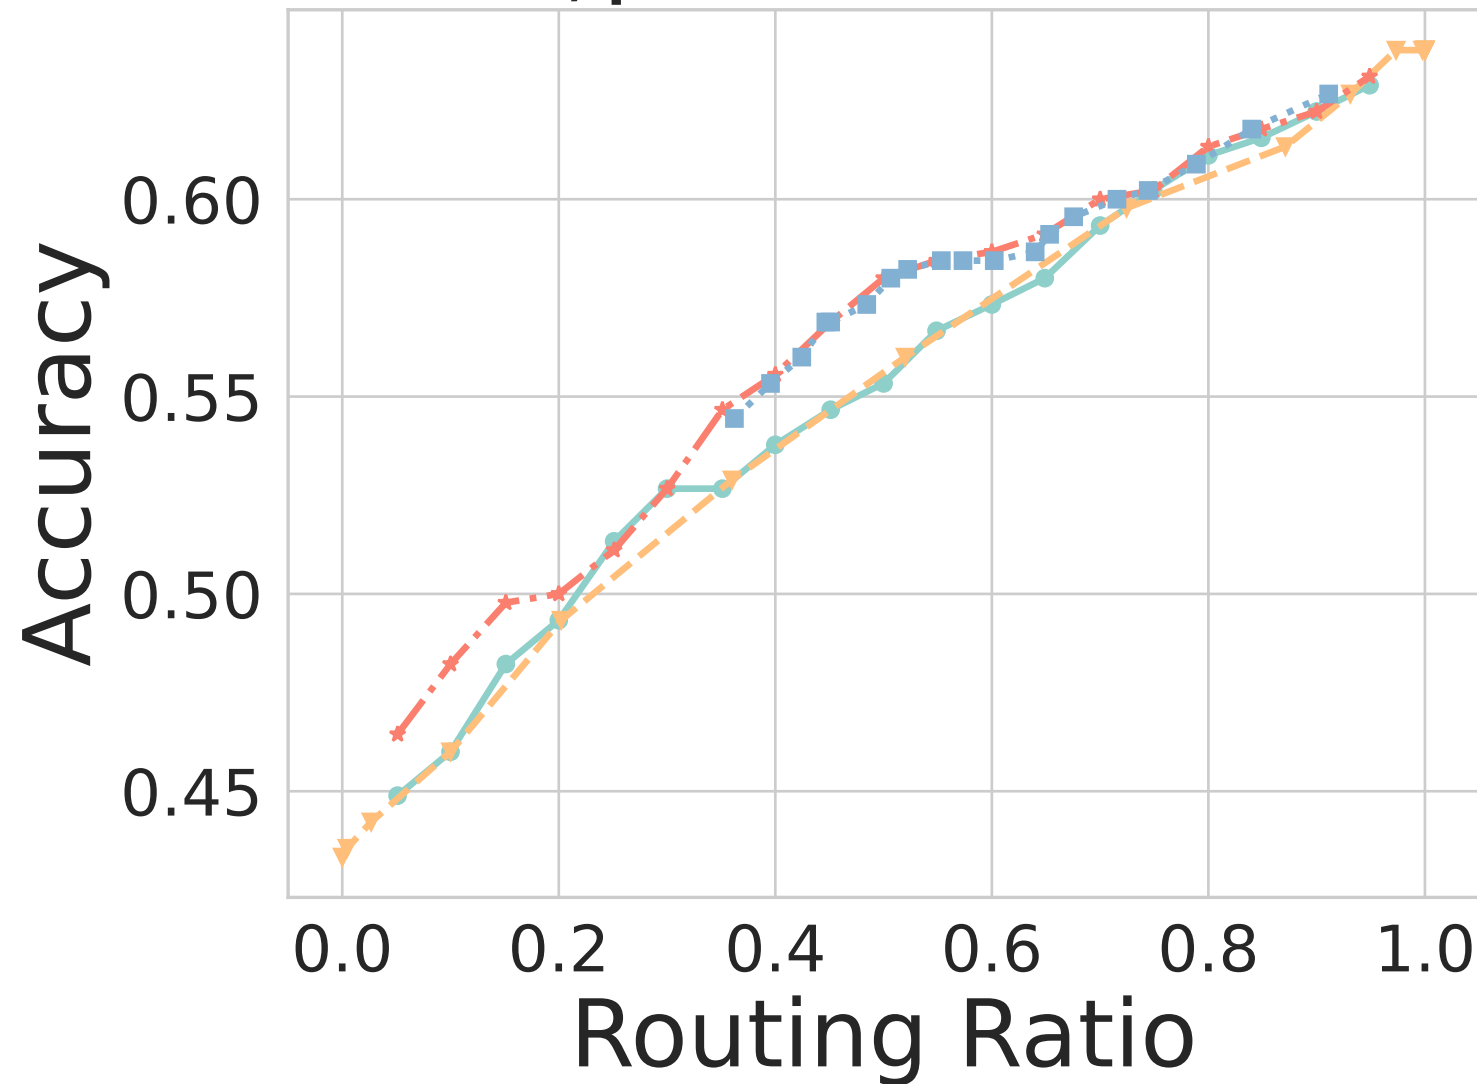

Supplement: supplementary_material [file cali_down_math_500_phi-3.5-mini_meta-llama_Llama-3.1-70B-Instruct.pdf › Routing_SLM_LLMs/Proxy_routing_prediction/to_meta-llama_Llama-3.1-70B-Instruct/math_500_as_downstream/cali_down_math_500_phi-3.5-mini_meta-llama_Llama-3.1-70B-Instruct.pdf]

# MATH-500, phi-4-mini-reasoning to Llama-3.1-70B

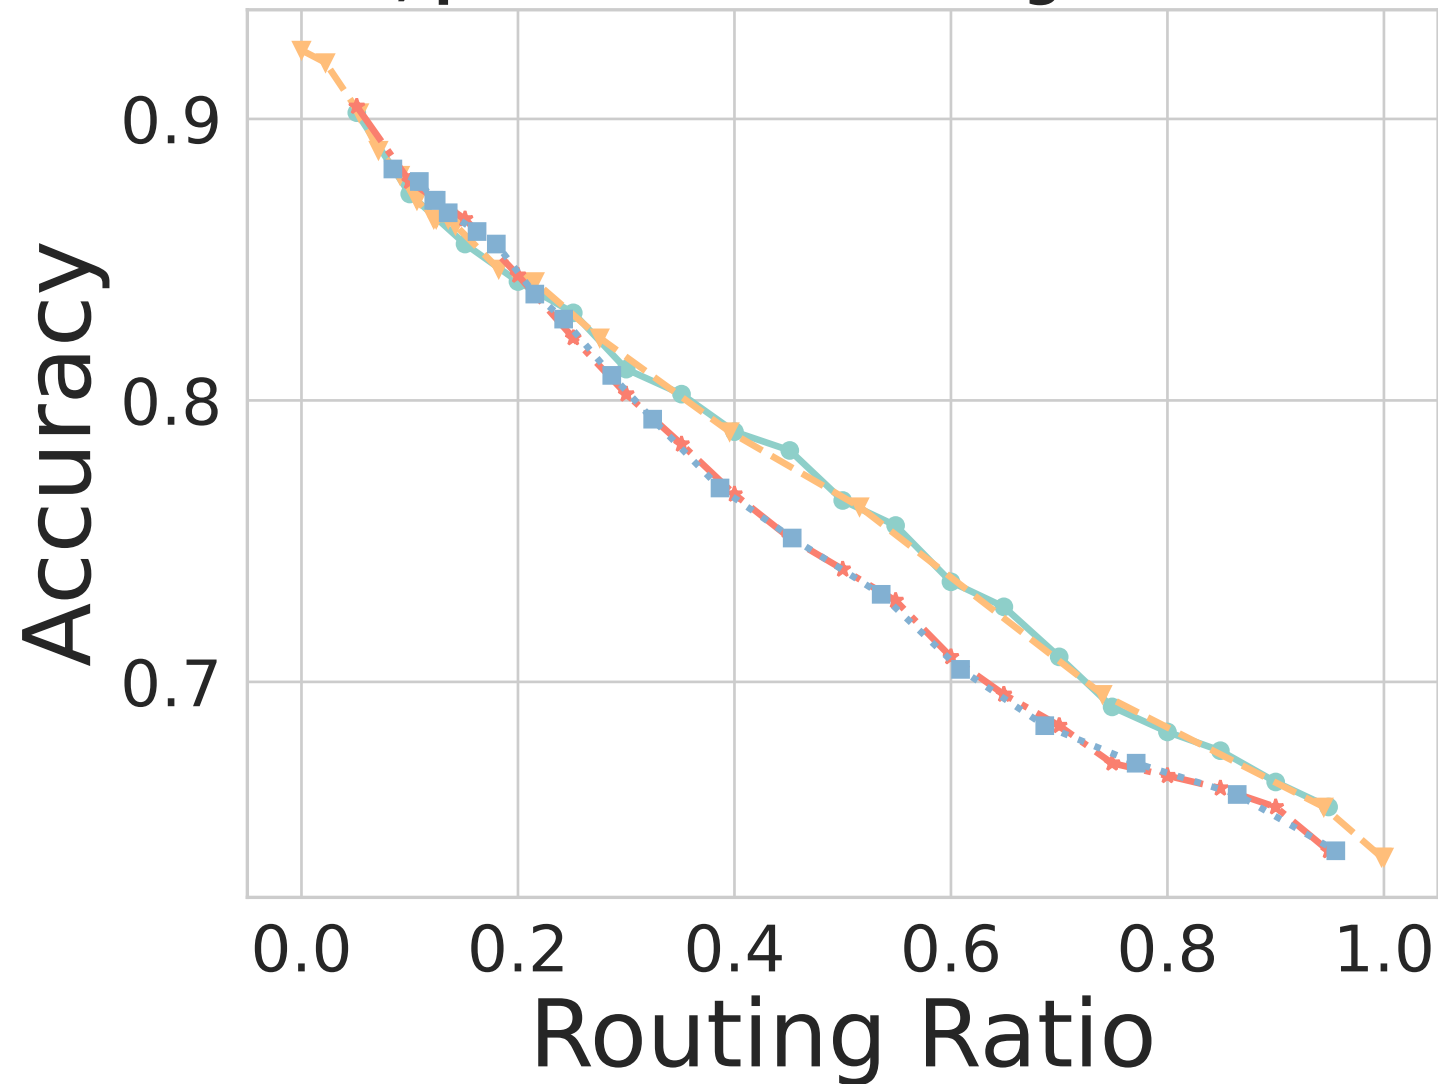

Supplement: supplementary_material [file cali_down_math_500_phi-4-mini-reasoning_meta-llama_Llama-3.1-70B-Instruct.pdf › Routing_SLM_LLMs/Proxy_routing_prediction/to_meta-llama_Llama-3.1-70B-Instruct/math_500_as_downstream/cali_down_math_500_phi-4-mini-reasoning_meta-llama_Llama-3.1-70B-Instruct.pdf]

**MATH-500, qwen-2.5-7b to Llama-3.1-70B**

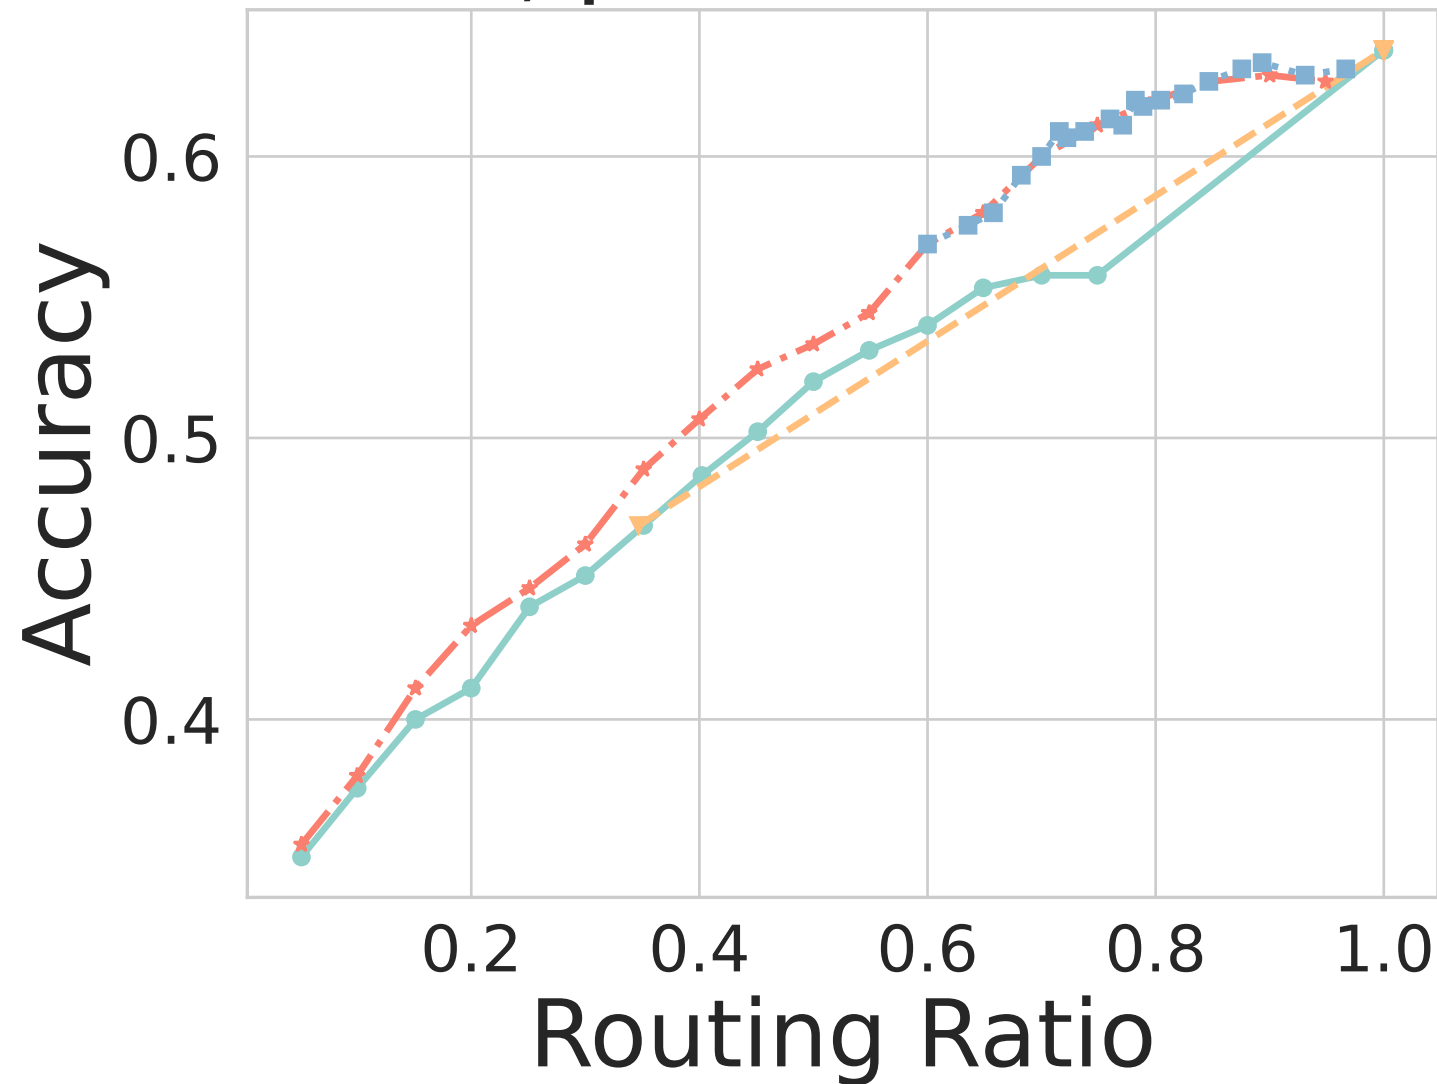

Supplement: supplementary_material [file cali_down_math_500_qwen-2.5-7b_meta-llama_Llama-3.1-70B-Instruct.pdf › Routing_SLM_LLMs/Proxy_routing_prediction/to_meta-llama_Llama-3.1-70B-Instruct/math_500_as_downstream/cali_down_math_500_qwen-2.5-7b_meta-llama_Llama-3.1-70B-Instruct.pdf]

**MATH-500, rwkv to Llama-3.1-70B**

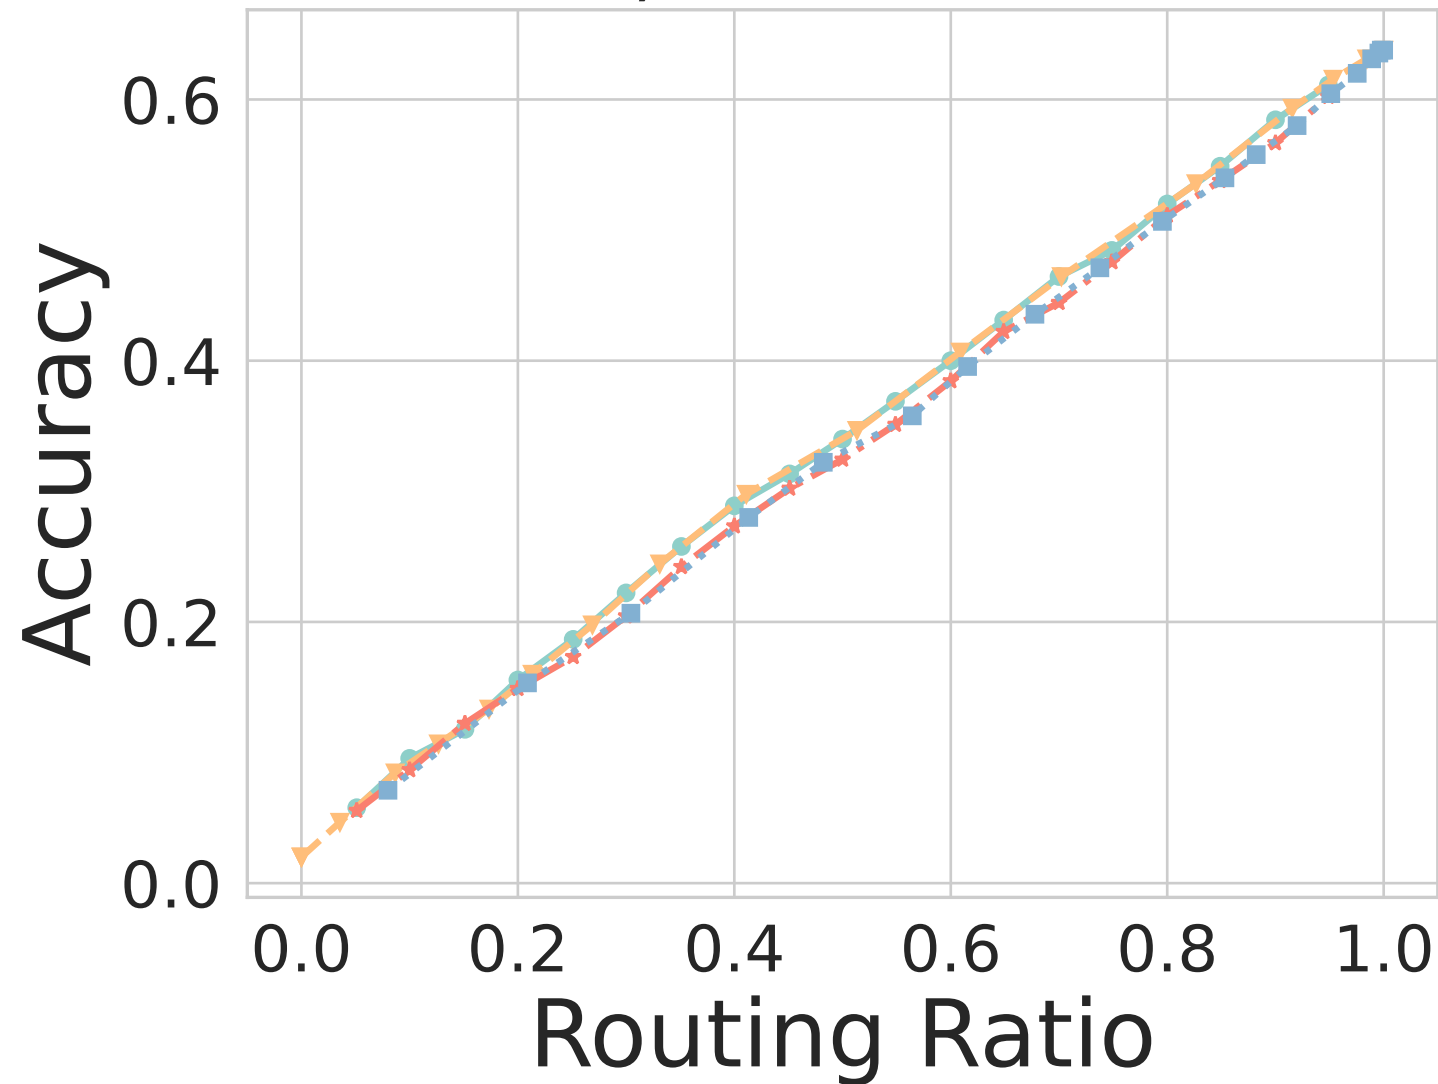

Supplement: supplementary_material [file cali_down_math_500_rwkv_meta-llama_Llama-3.1-70B-Instruct.pdf › Routing_SLM_LLMs/Proxy_routing_prediction/to_meta-llama_Llama-3.1-70B-Instruct/math_500_as_downstream/cali_down_math_500_rwkv_meta-llama_Llama-3.1-70B-Instruct.pdf]

**MMLU, Qwen3-0.6B to Llama-3.1-70B**

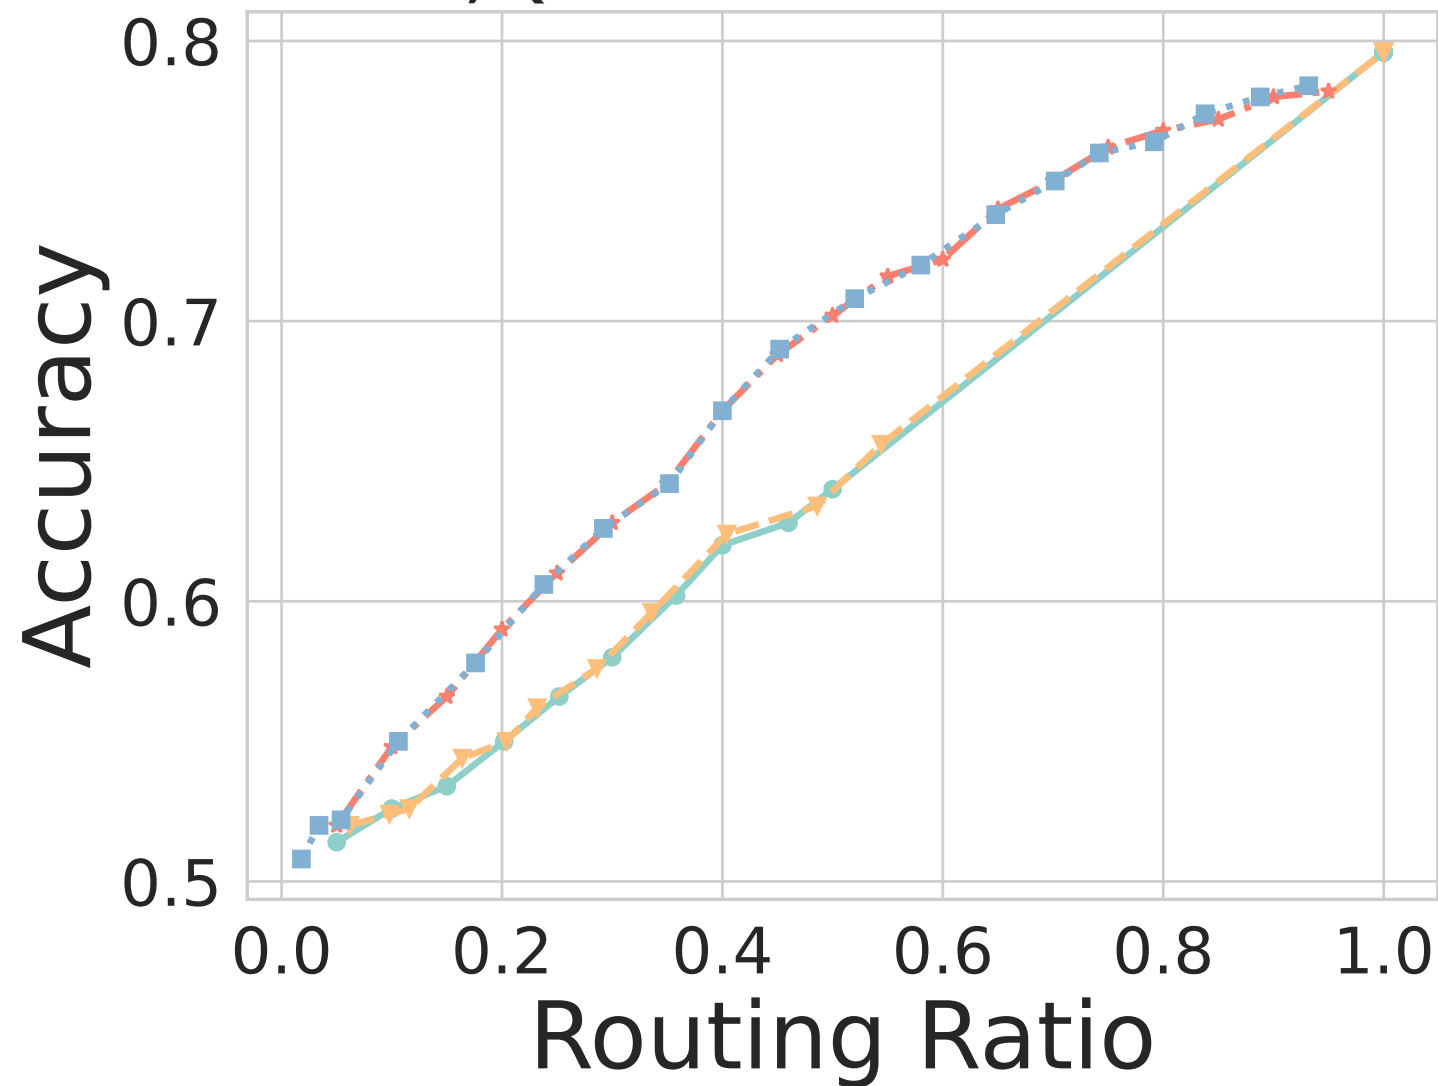

Supplement: supplementary_material [file cali_down_mmlu_Qwen3-0.6B_meta-llama_Llama-3.1-70B-Instruct.pdf › Routing_SLM_LLMs/Proxy_routing_prediction/to_meta-llama_Llama-3.1-70B-Instruct/mmlu_as_downstream/cali_down_mmlu_Qwen3-0.6B_meta-llama_Llama-3.1-70B-Instruct.pdf]

**MMLU, Qwen3-1.7B to Llama-3.1-70B**

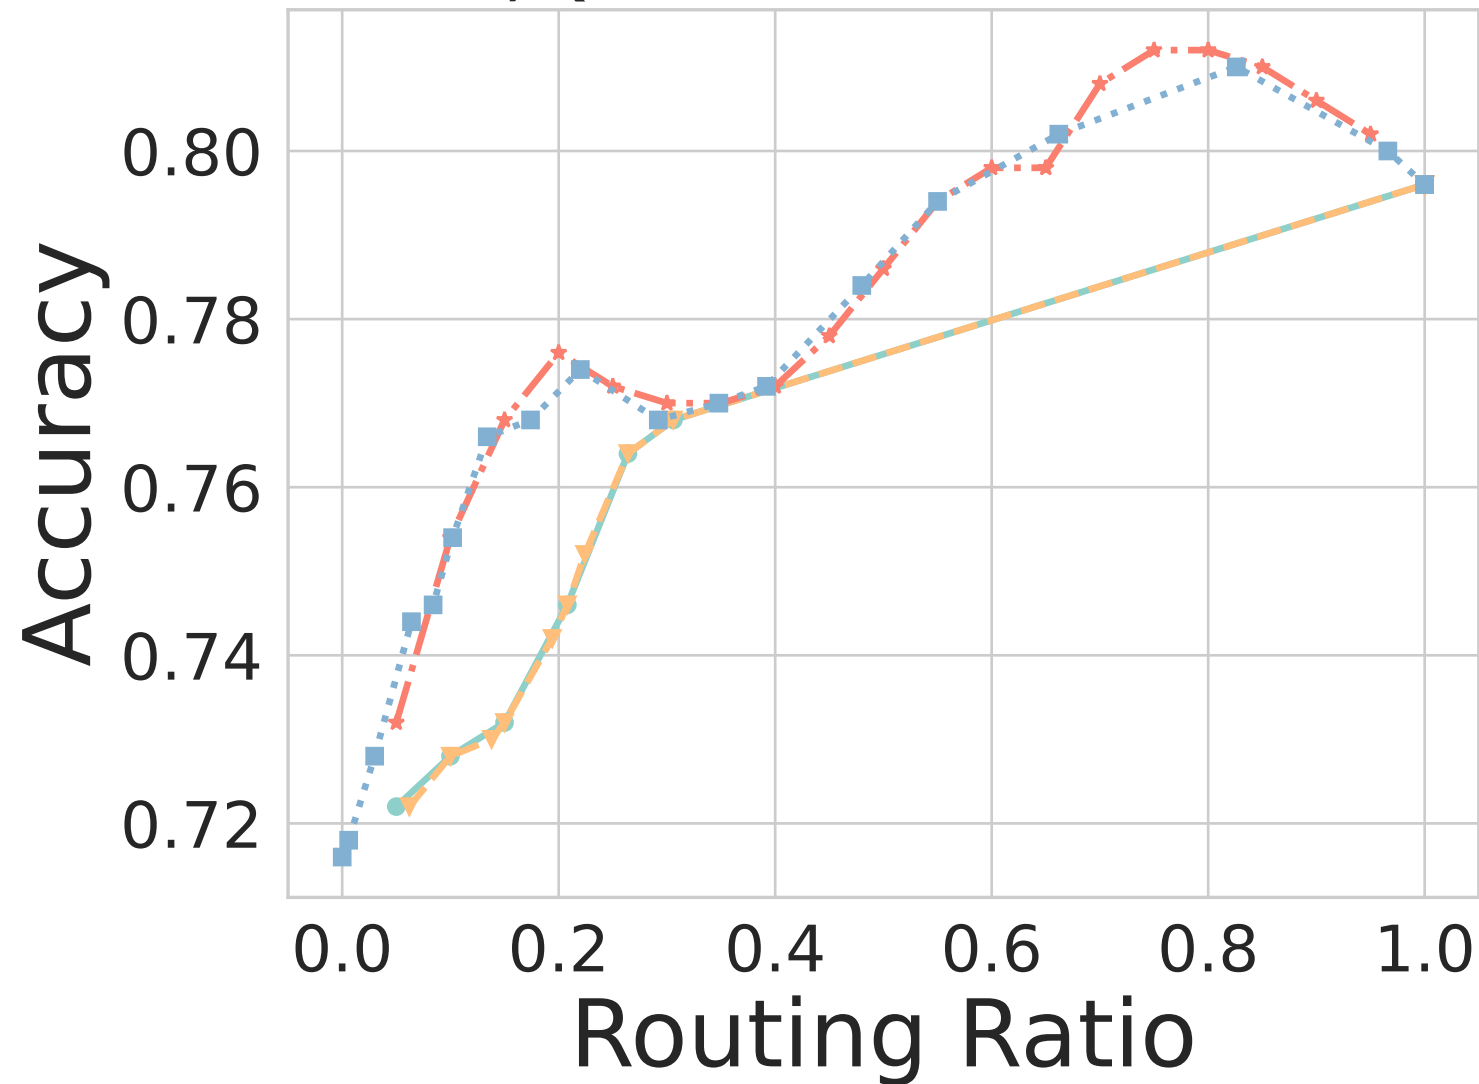

Supplement: supplementary_material [file cali_down_mmlu_Qwen3-1.7B_meta-llama_Llama-3.1-70B-Instruct.pdf › Routing_SLM_LLMs/Proxy_routing_prediction/to_meta-llama_Llama-3.1-70B-Instruct/mmlu_as_downstream/cali_down_mmlu_Qwen3-1.7B_meta-llama_Llama-3.1-70B-Instruct.pdf]

**MMLU, Qwen3-4B to Llama-3.1-70B**

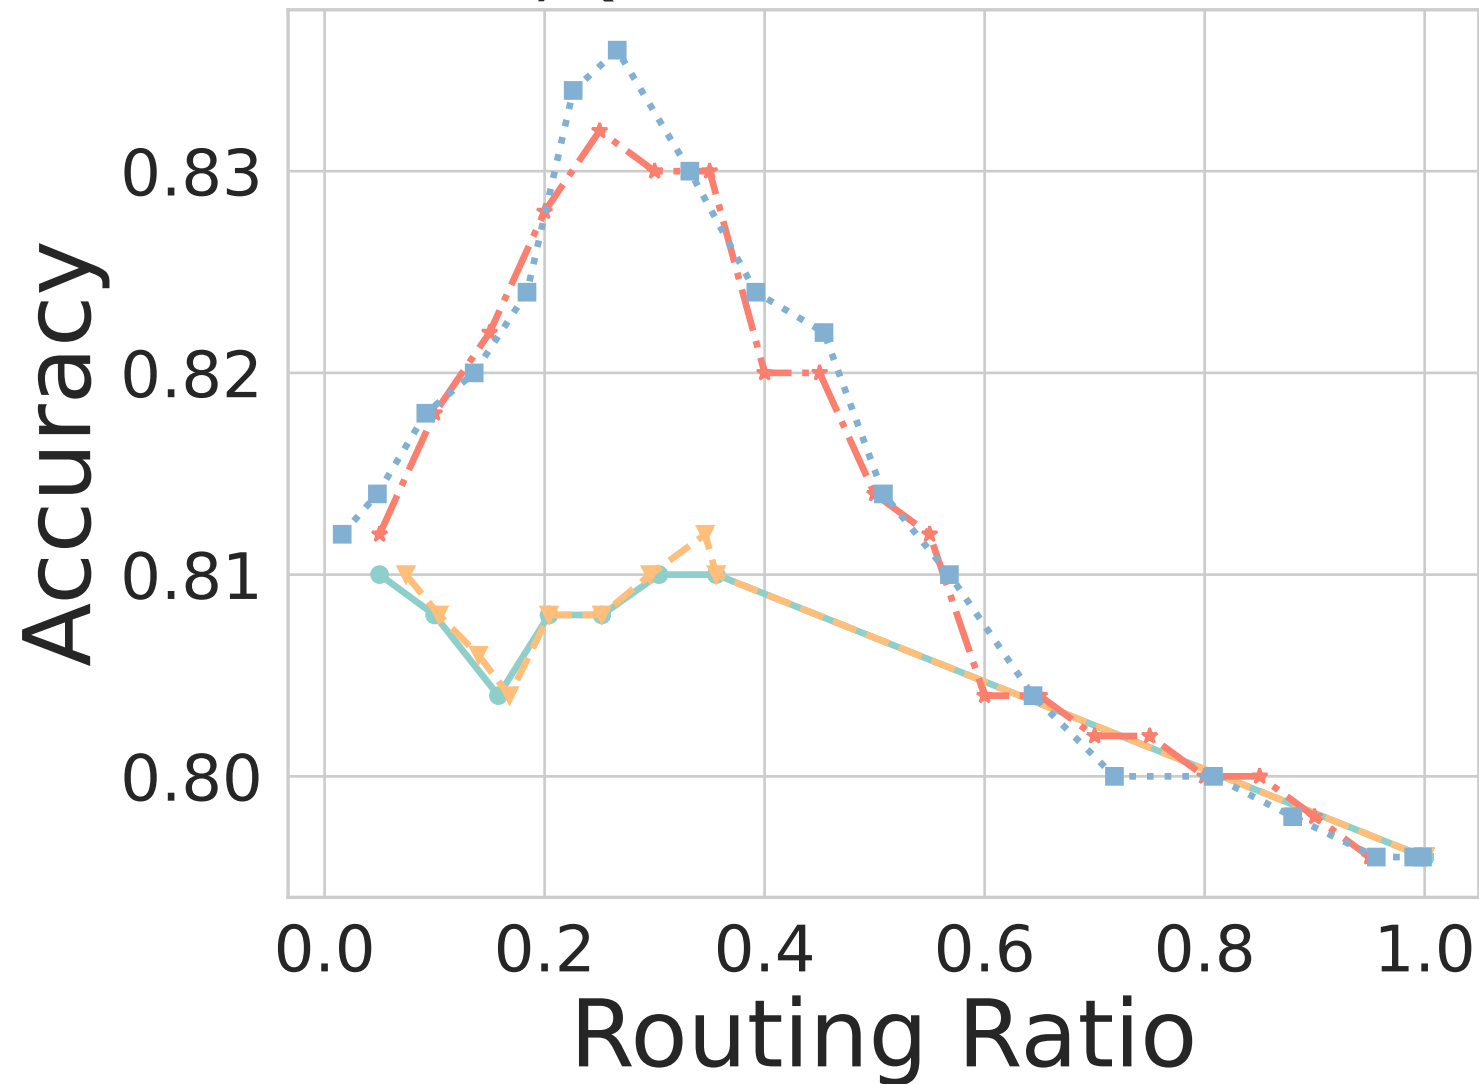

Supplement: supplementary_material [file cali_down_mmlu_Qwen3-4B_meta-llama_Llama-3.1-70B-Instruct.pdf › Routing_SLM_LLMs/Proxy_routing_prediction/to_meta-llama_Llama-3.1-70B-Instruct/mmlu_as_downstream/cali_down_mmlu_Qwen3-4B_meta-llama_Llama-3.1-70B-Instruct.pdf]

**MMLU, granite-3.1-8b to Llama-3.1-70B**

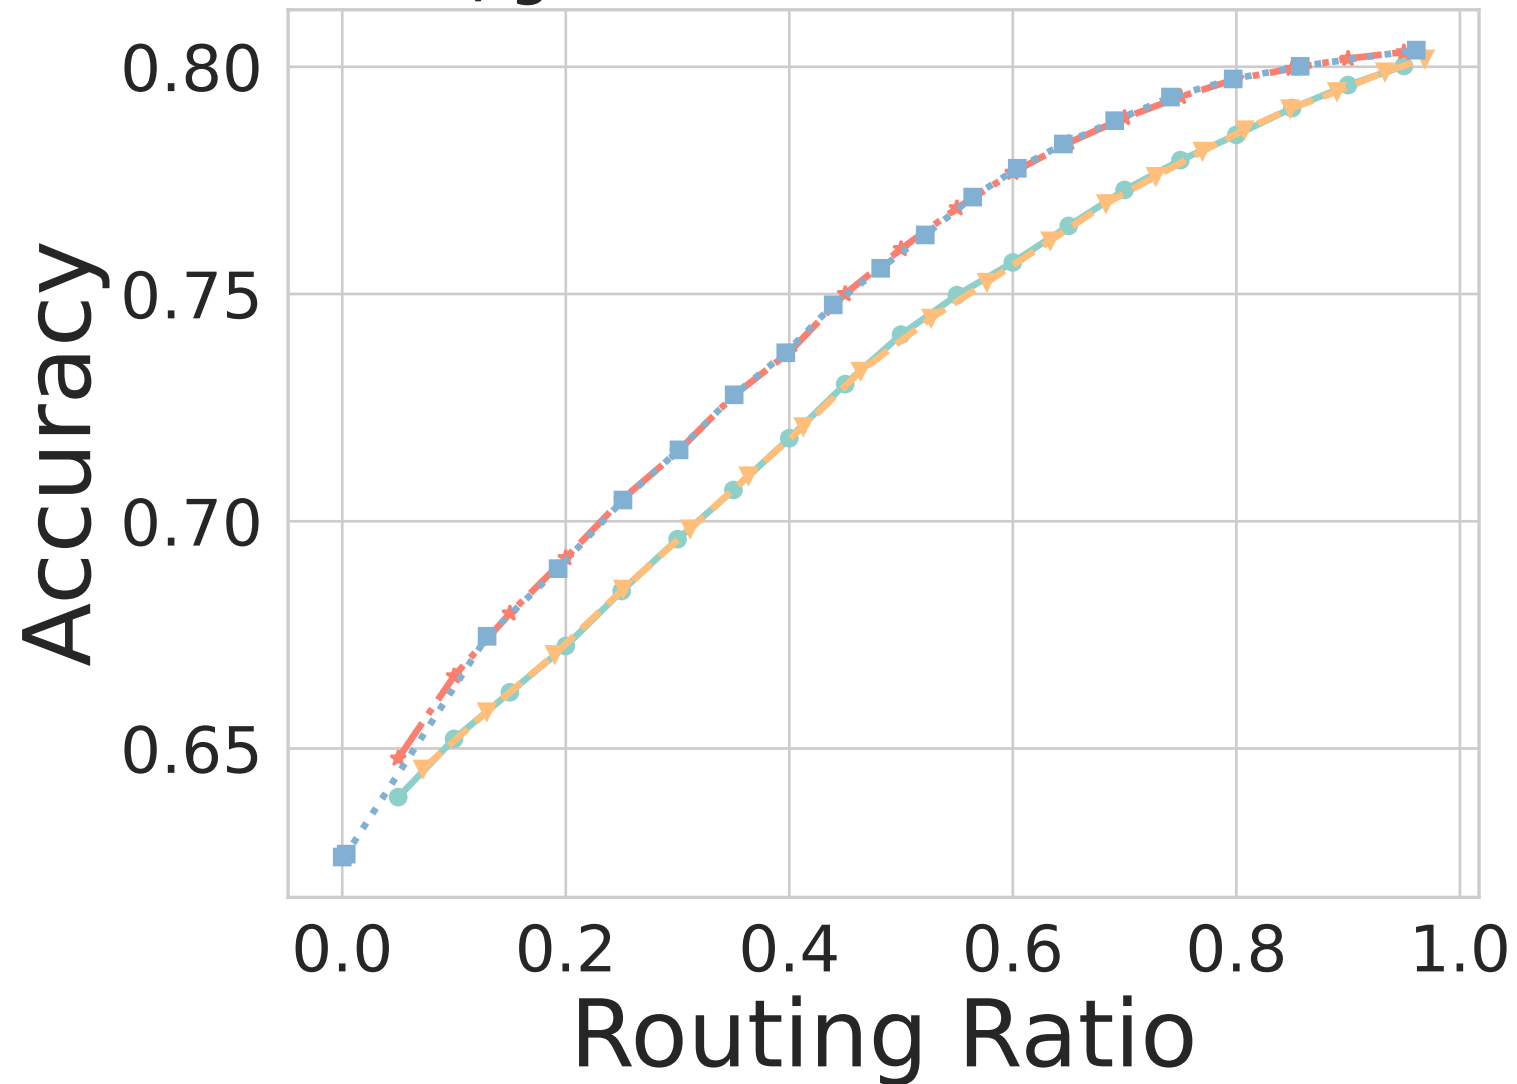

Supplement: supplementary_material [file cali_down_mmlu_granite-3.1-8b_meta-llama_Llama-3.1-70B-Instruct.pdf › Routing_SLM_LLMs/Proxy_routing_prediction/to_meta-llama_Llama-3.1-70B-Instruct/mmlu_as_downstream/cali_down_mmlu_granite-3.1-8b_meta-llama_Llama-3.1-70B-Instruct.pdf]

**MMLU, llama-3.1-8b to Llama-3.1-70B**

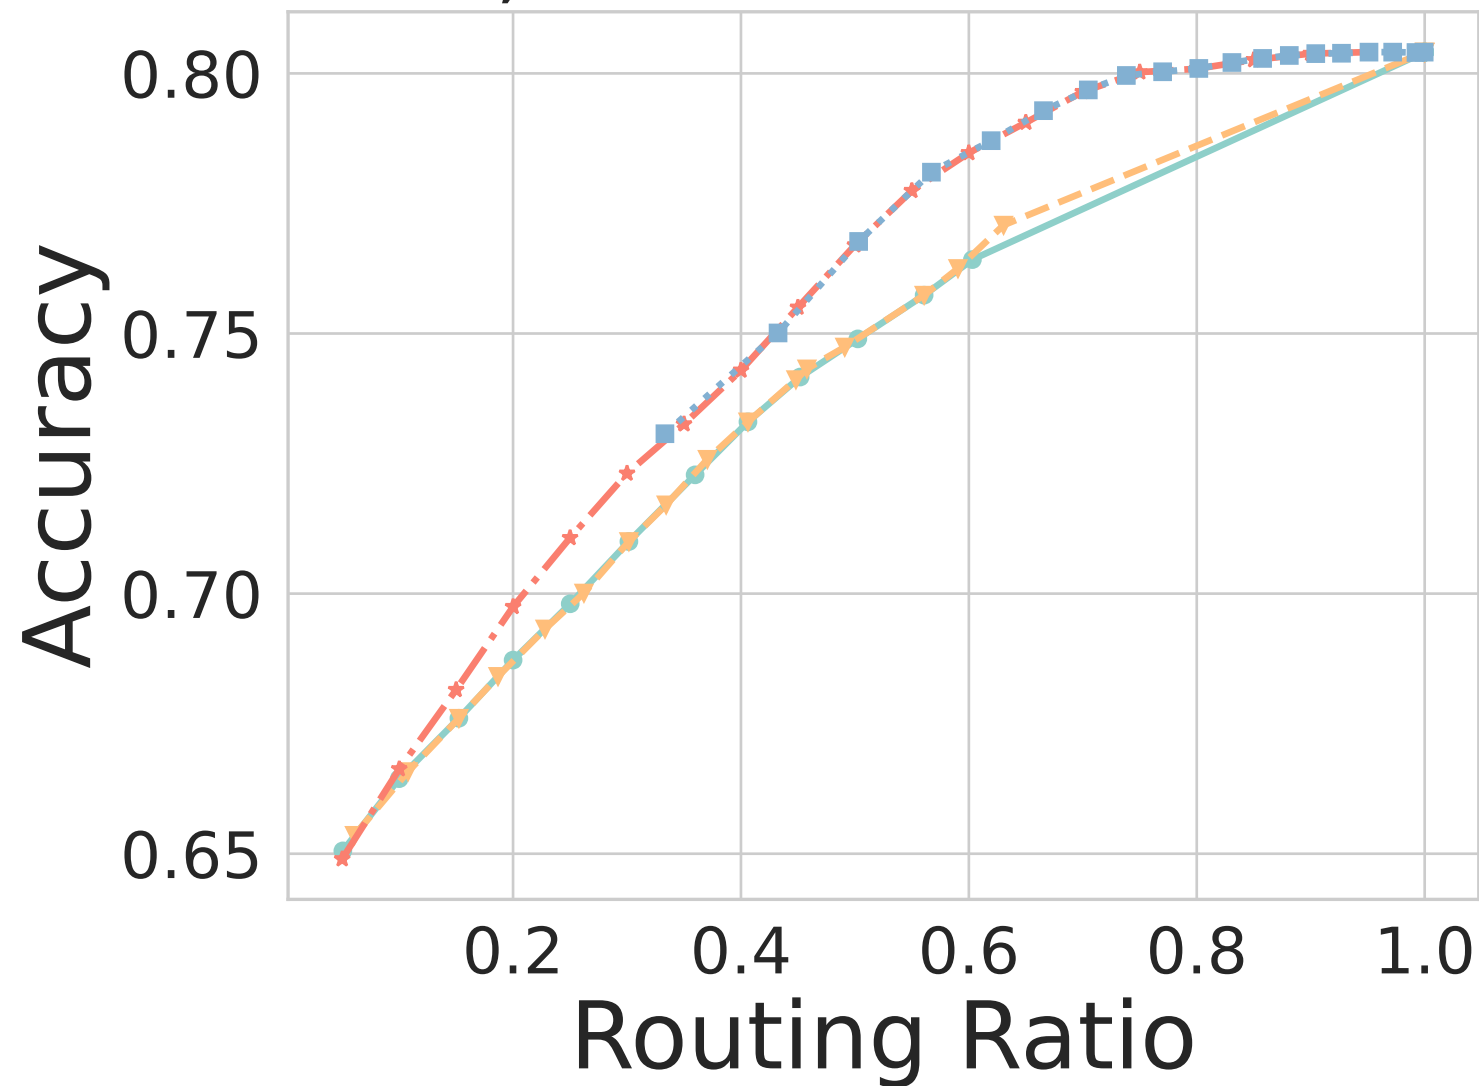

Supplement: supplementary_material [file cali_down_mmlu_llama-3.1-8b_meta-llama_Llama-3.1-70B-Instruct.pdf › Routing_SLM_LLMs/Proxy_routing_prediction/to_meta-llama_Llama-3.1-70B-Instruct/mmlu_as_downstream/cali_down_mmlu_llama-3.1-8b_meta-llama_Llama-3.1-70B-Instruct.pdf]

**MMLU, llama-3.2-1b to Llama-3.1-70B**

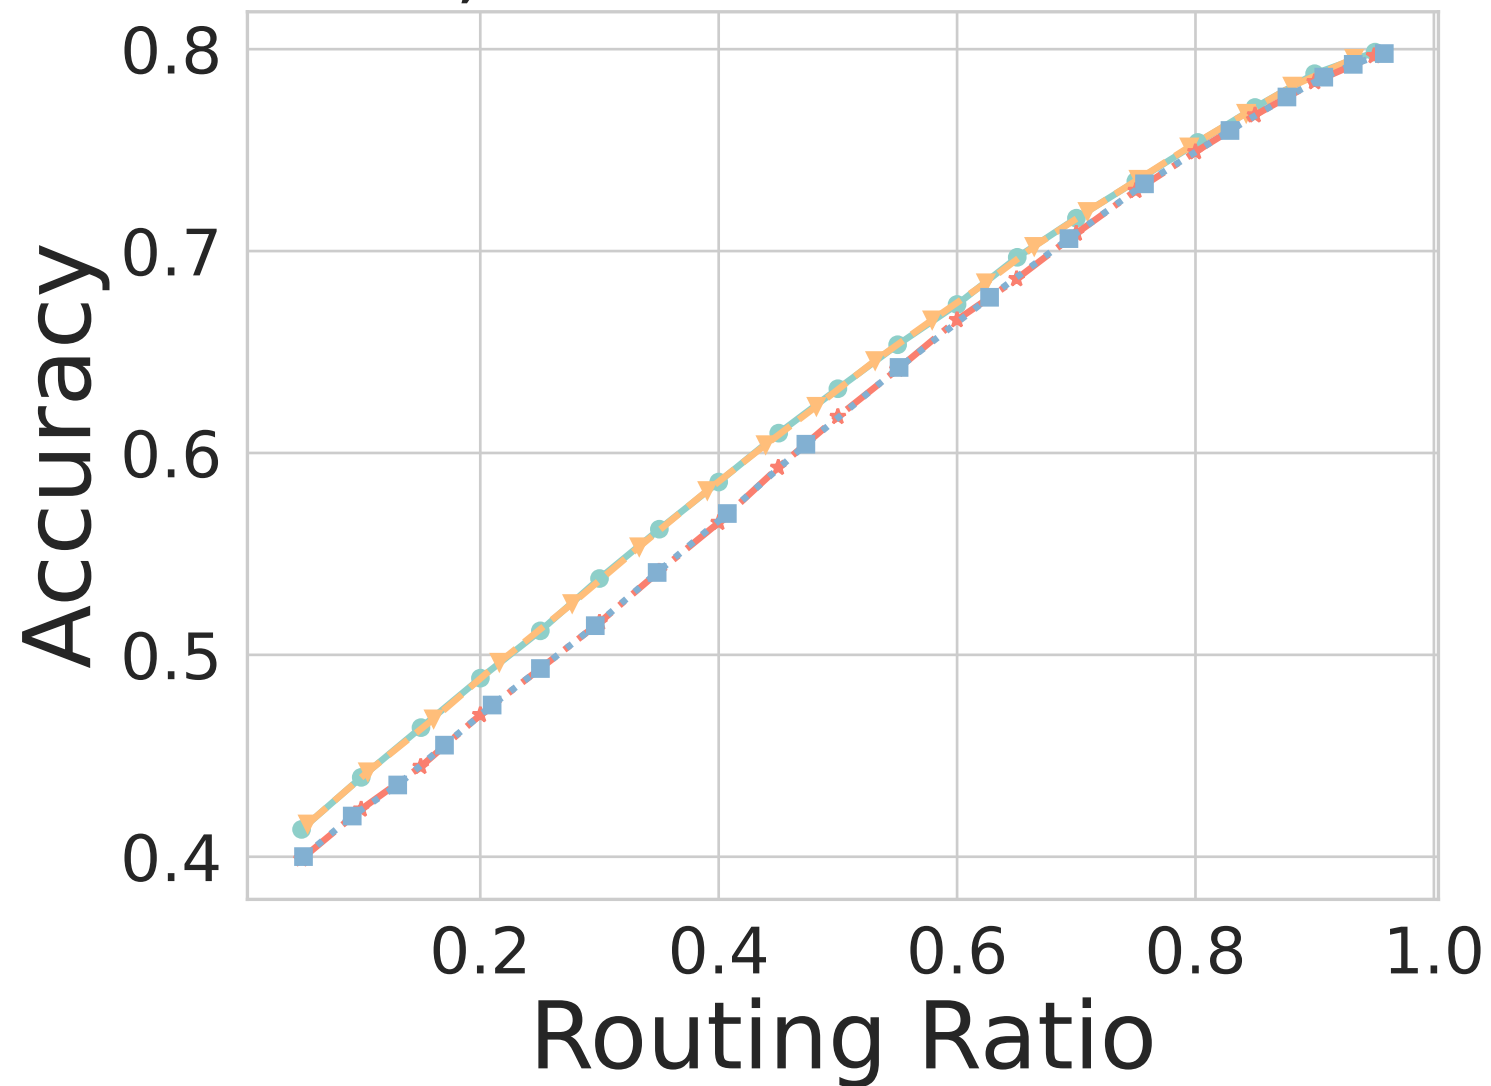

Supplement: supplementary_material [file cali_down_mmlu_llama-3.2-1b_meta-llama_Llama-3.1-70B-Instruct.pdf › Routing_SLM_LLMs/Proxy_routing_prediction/to_meta-llama_Llama-3.1-70B-Instruct/mmlu_as_downstream/cali_down_mmlu_llama-3.2-1b_meta-llama_Llama-3.1-70B-Instruct.pdf]

**MMLU, llama-3.2-3b to Llama-3.1-70B**

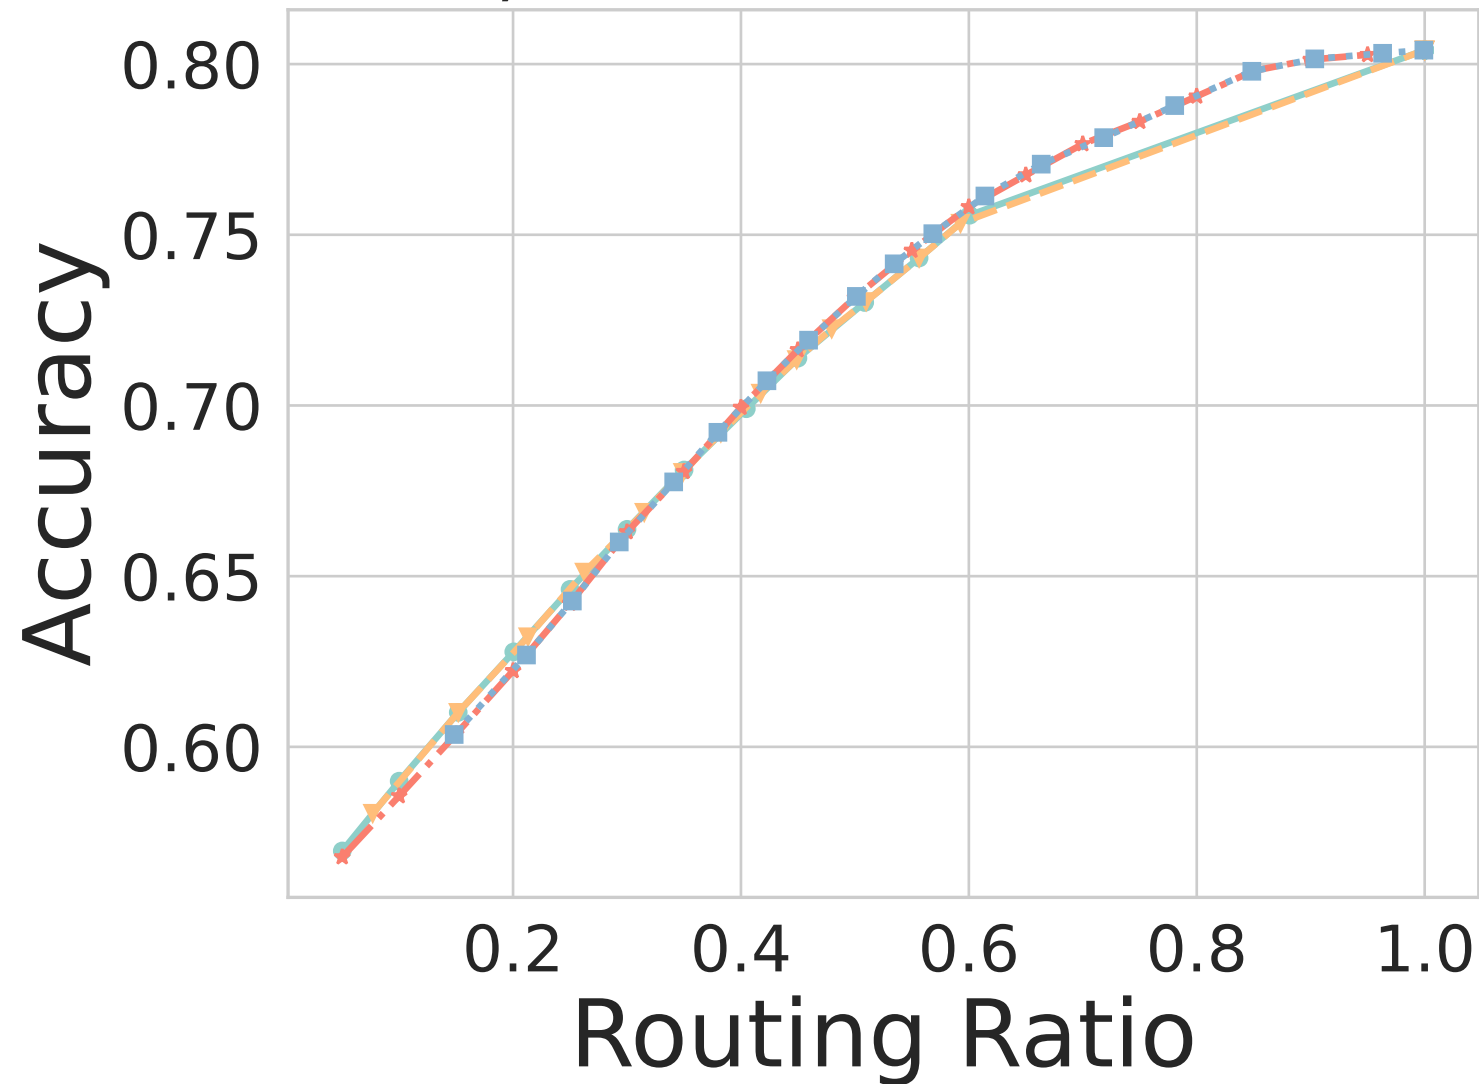

Supplement: supplementary_material [file cali_down_mmlu_llama-3.2-3b_meta-llama_Llama-3.1-70B-Instruct.pdf › Routing_SLM_LLMs/Proxy_routing_prediction/to_meta-llama_Llama-3.1-70B-Instruct/mmlu_as_downstream/cali_down_mmlu_llama-3.2-3b_meta-llama_Llama-3.1-70B-Instruct.pdf]

**MMLU, mistral-7b to Llama-3.1-70B**

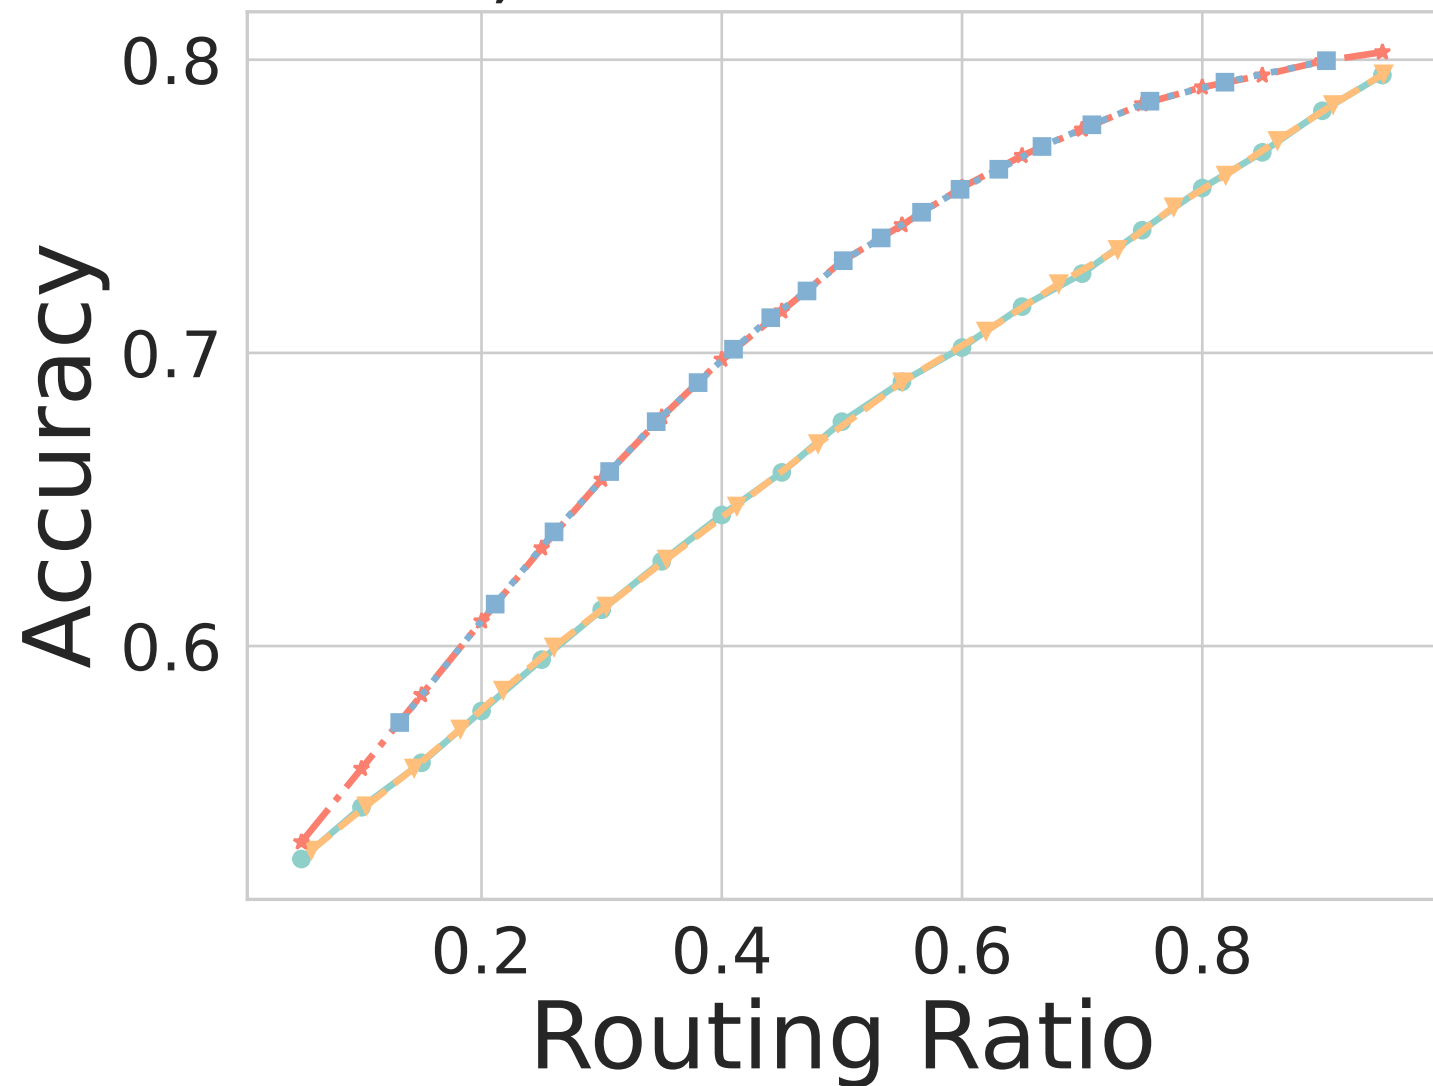

Supplement: supplementary_material [file cali_down_mmlu_mistral-7b_meta-llama_Llama-3.1-70B-Instruct.pdf › Routing_SLM_LLMs/Proxy_routing_prediction/to_meta-llama_Llama-3.1-70B-Instruct/mmlu_as_downstream/cali_down_mmlu_mistral-7b_meta-llama_Llama-3.1-70B-Instruct.pdf]

**MMLU, phi-3.5-mini to Llama-3.1-70B**

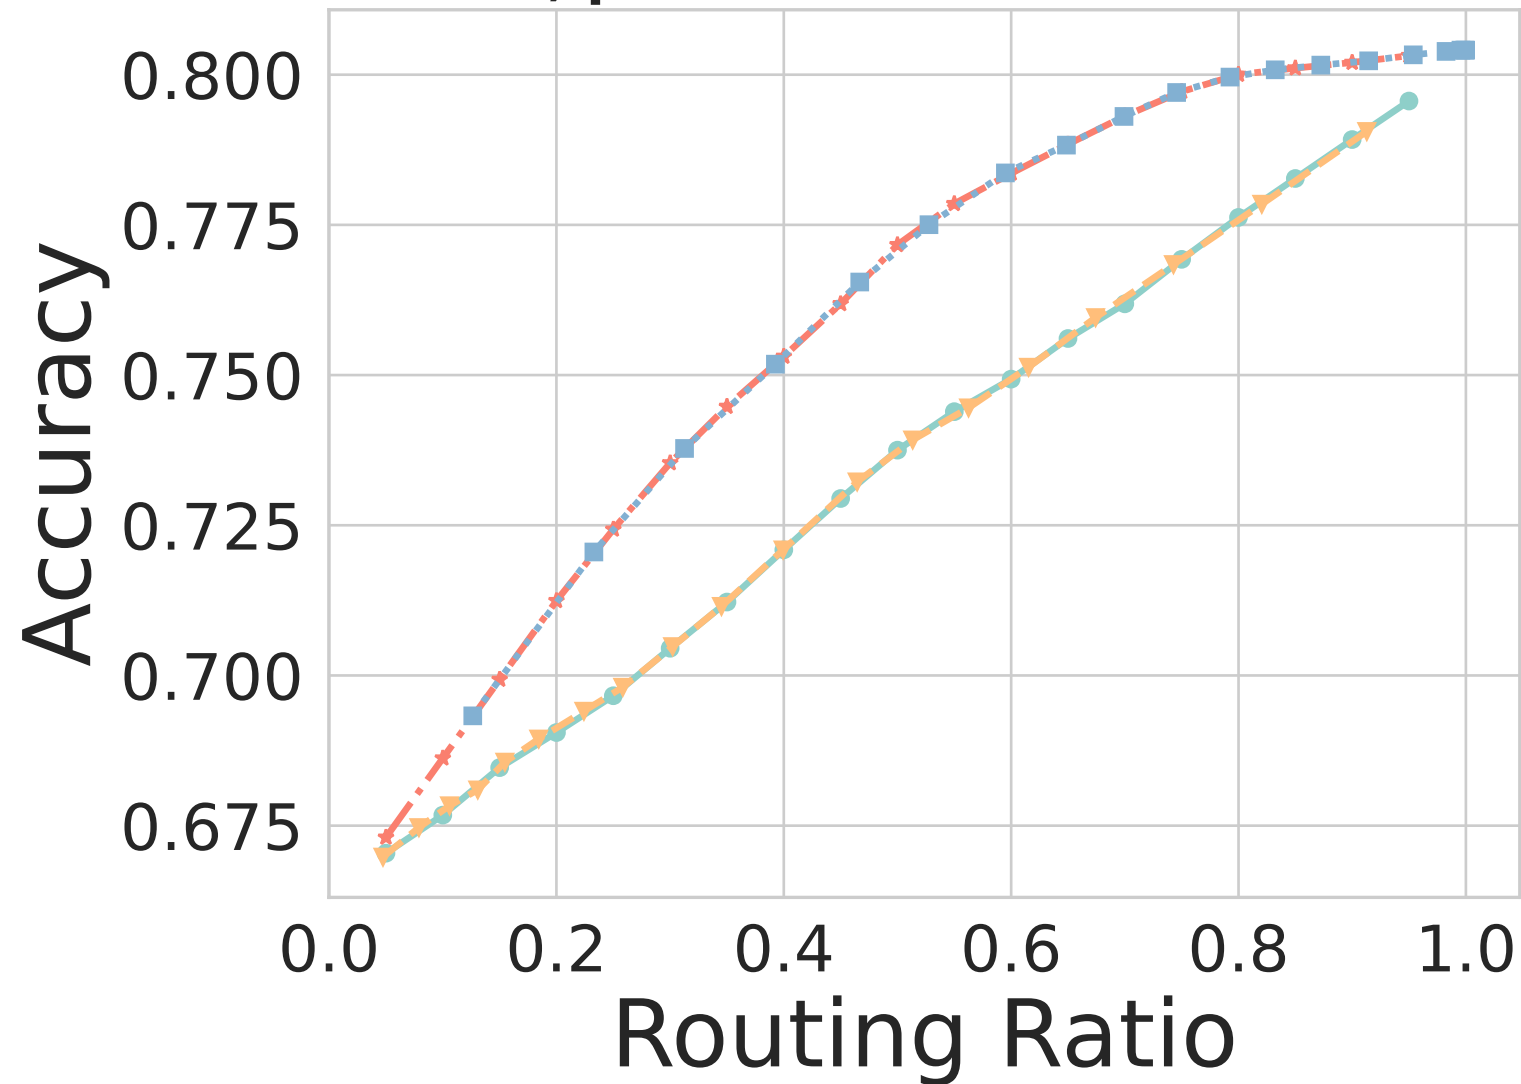

Supplement: supplementary_material [file cali_down_mmlu_phi-3.5-mini_meta-llama_Llama-3.1-70B-Instruct.pdf › Routing_SLM_LLMs/Proxy_routing_prediction/to_meta-llama_Llama-3.1-70B-Instruct/mmlu_as_downstream/cali_down_mmlu_phi-3.5-mini_meta-llama_Llama-3.1-70B-Instruct.pdf]

**MMLU, phi-4-mini-reasoning to Llama-3.1-70B**

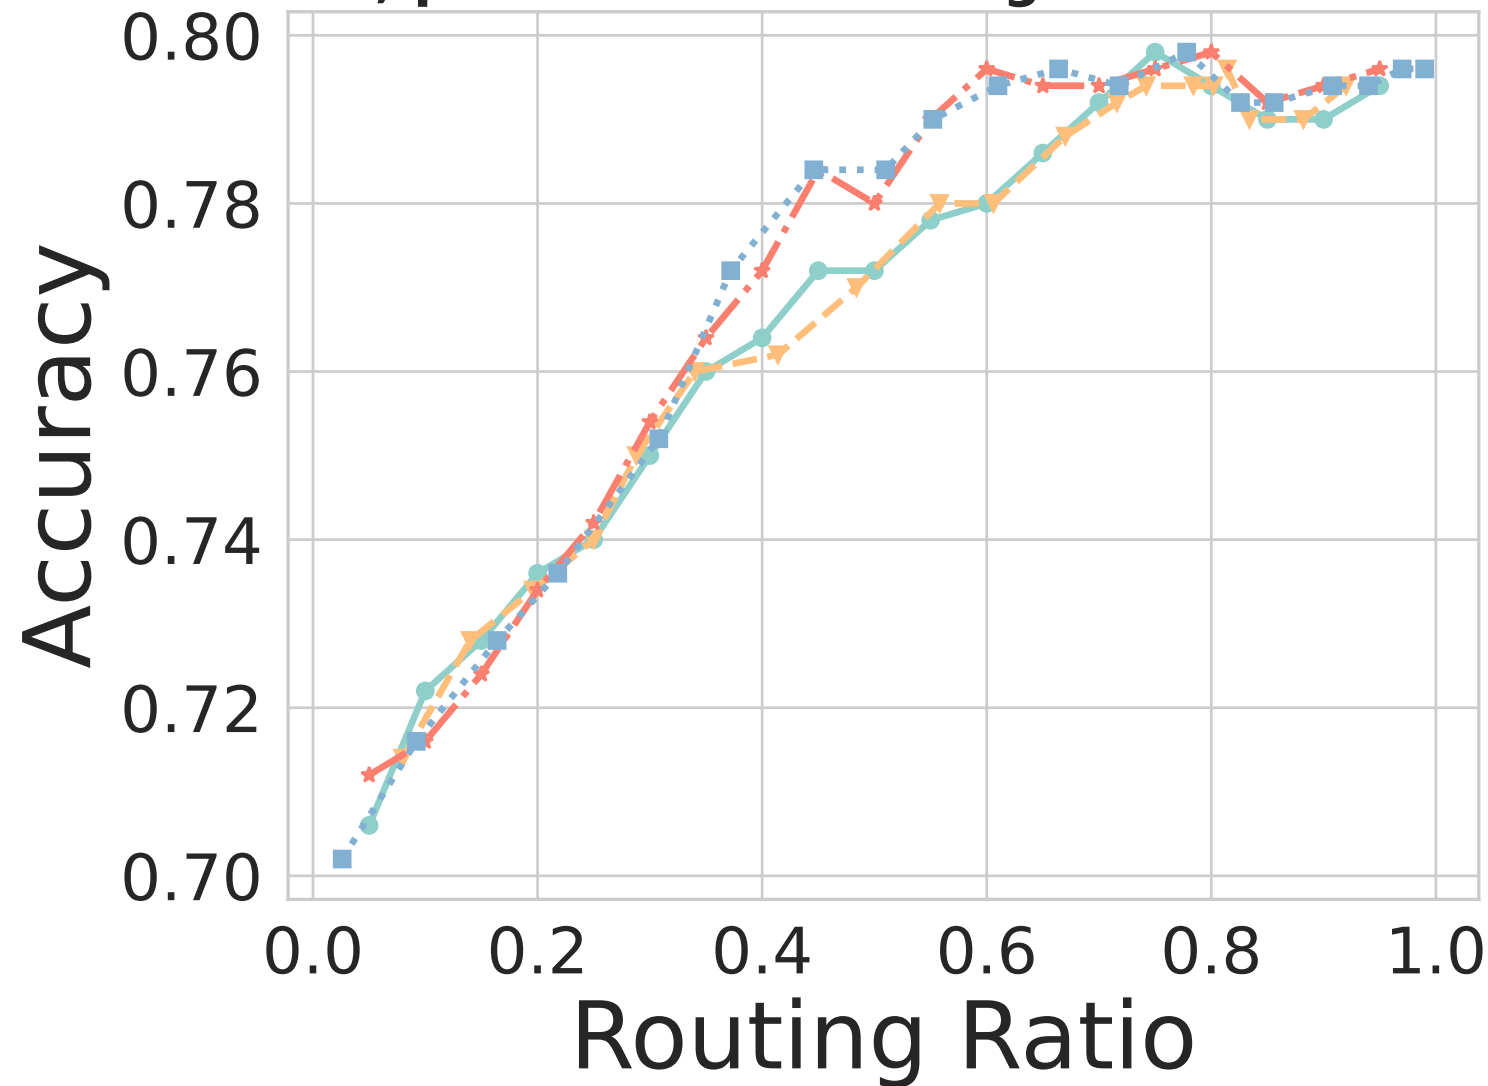

Supplement: supplementary_material [file cali_down_mmlu_phi-4-mini-reasoning_meta-llama_Llama-3.1-70B-Instruct.pdf › Routing_SLM_LLMs/Proxy_routing_prediction/to_meta-llama_Llama-3.1-70B-Instruct/mmlu_as_downstream/cali_down_mmlu_phi-4-mini-reasoning_meta-llama_Llama-3.1-70B-Instruct.pdf]

**MMLU, qwen-2.5-7b to Llama-3.1-70B**

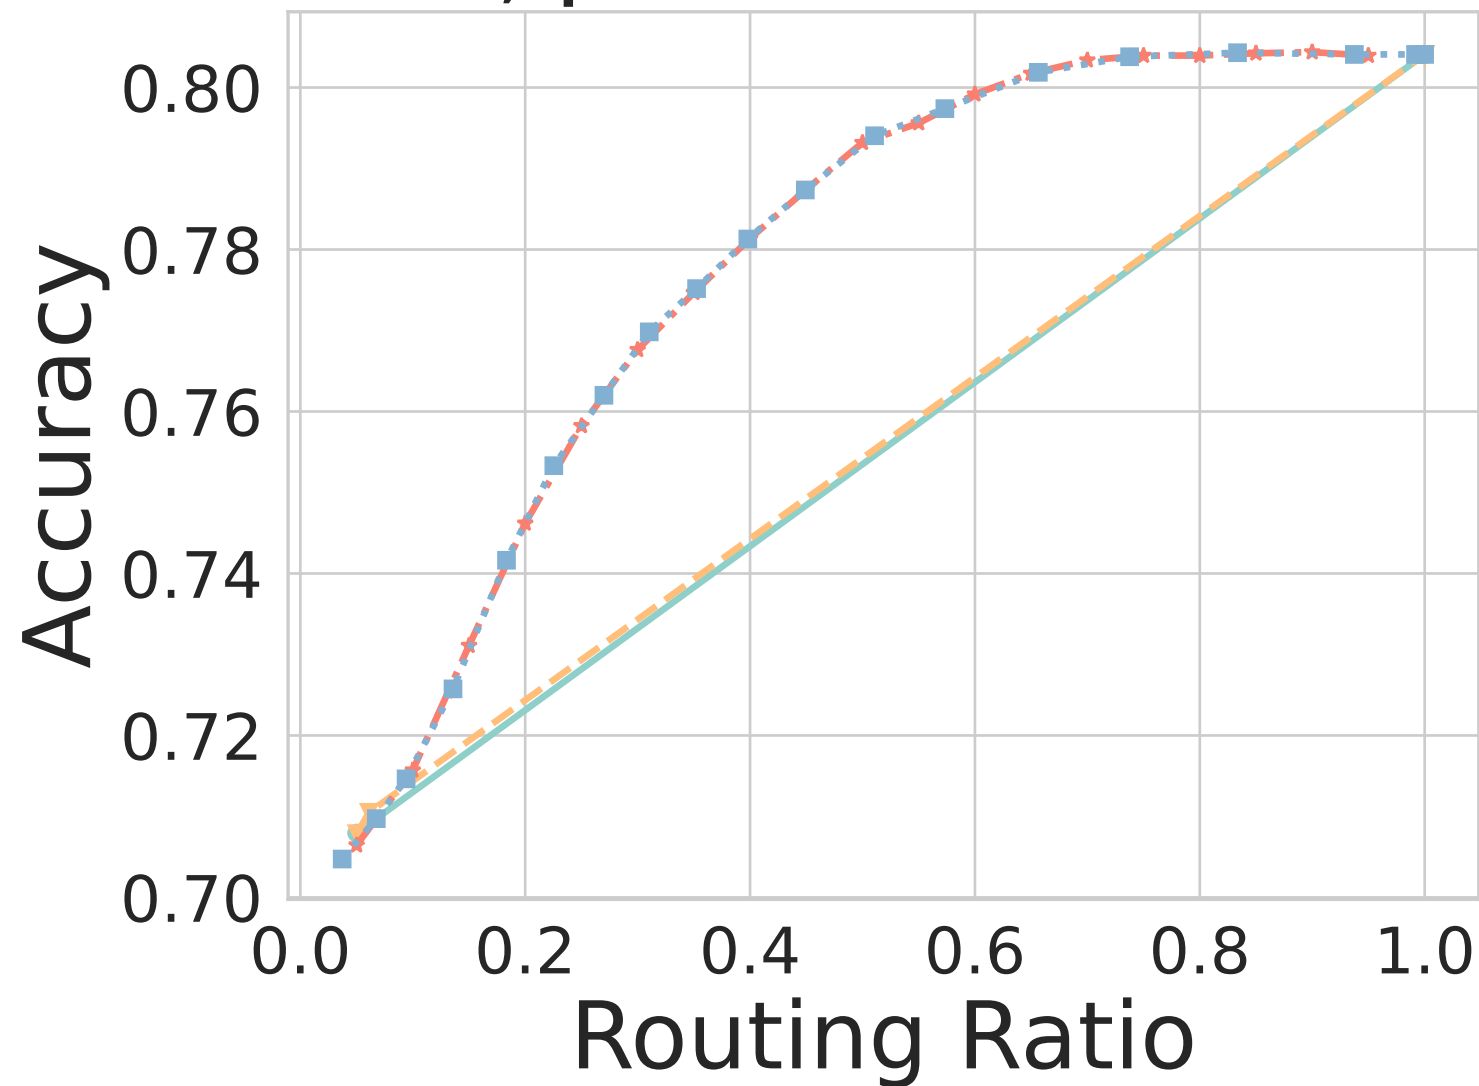

Supplement: supplementary_material [file cali_down_mmlu_qwen-2.5-7b_meta-llama_Llama-3.1-70B-Instruct.pdf › Routing_SLM_LLMs/Proxy_routing_prediction/to_meta-llama_Llama-3.1-70B-Instruct/mmlu_as_downstream/cali_down_mmlu_qwen-2.5-7b_meta-llama_Llama-3.1-70B-Instruct.pdf]

**MMLU, rwkv to Llama-3.1-70B**

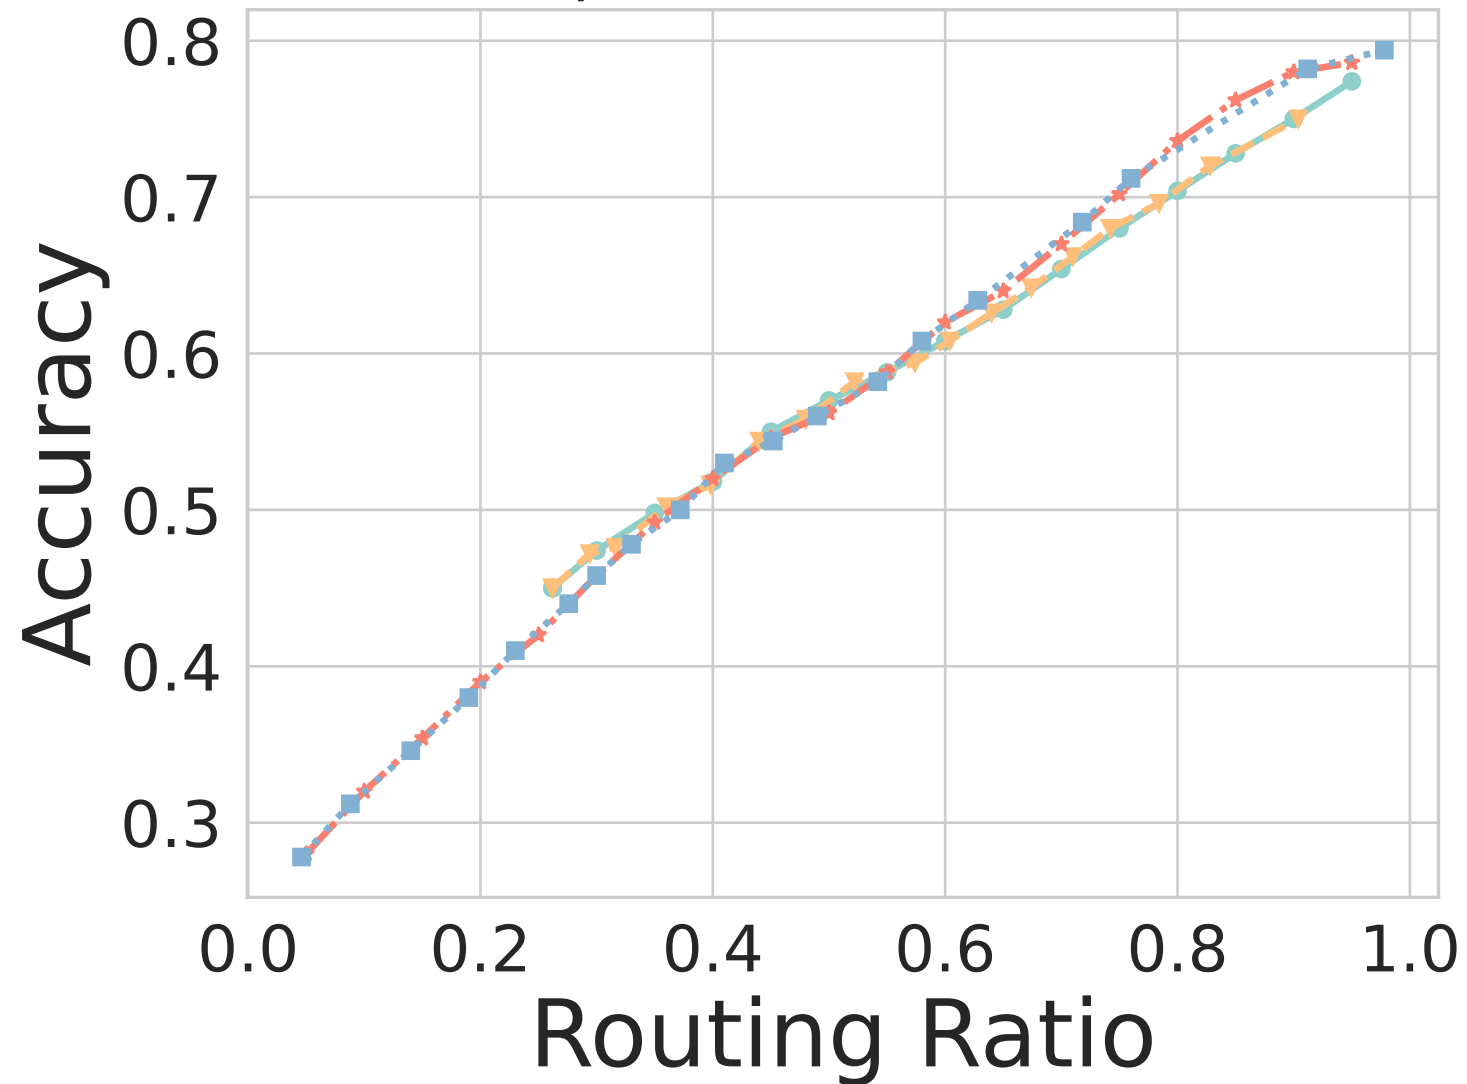

Supplement: supplementary_material [file cali_down_mmlu_rwkv_meta-llama_Llama-3.1-70B-Instruct.pdf › Routing_SLM_LLMs/Proxy_routing_prediction/to_meta-llama_Llama-3.1-70B-Instruct/mmlu_as_downstream/cali_down_mmlu_rwkv_meta-llama_Llama-3.1-70B-Instruct.pdf]

**MultiArith, Qwen3-0.6B to Llama-3.1-70B**

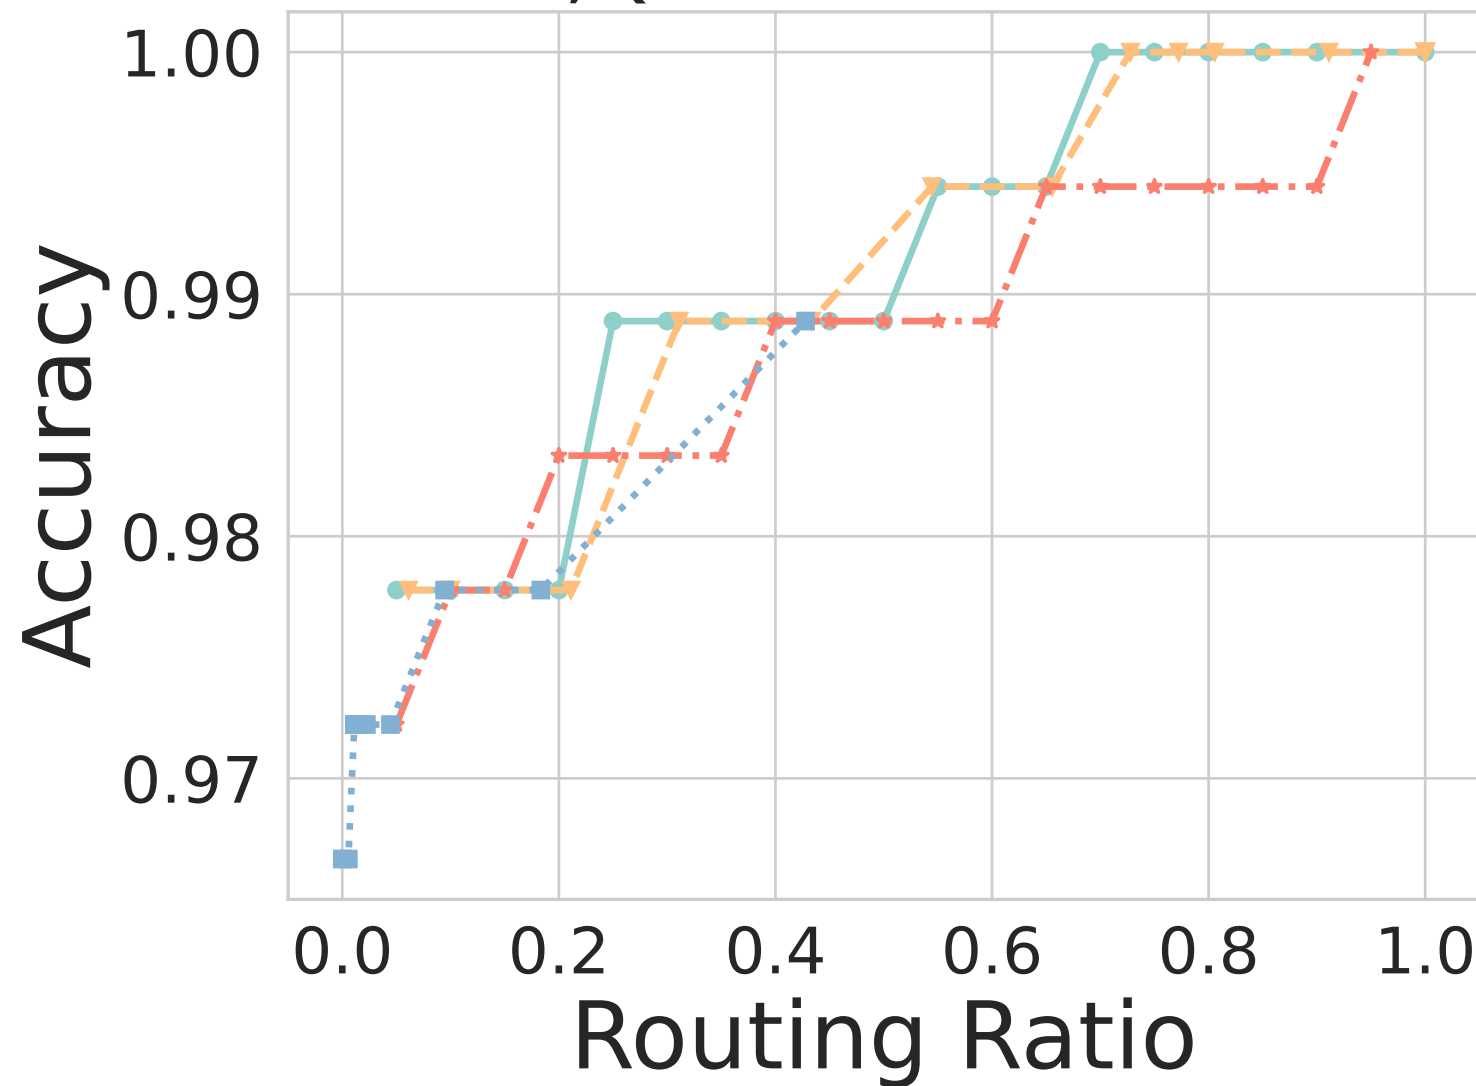

Supplement: supplementary_material [file cali_down_multiarith_Qwen3-0.6B_meta-llama_Llama-3.1-70B-Instruct.pdf › Routing_SLM_LLMs/Proxy_routing_prediction/to_meta-llama_Llama-3.1-70B-Instruct/multiarith_as_downstream/cali_down_multiarith_Qwen3-0.6B_meta-llama_Llama-3.1-70B-Instruct.pdf]

**MultiArith, Qwen3-1.7B to Llama-3.1-70B**

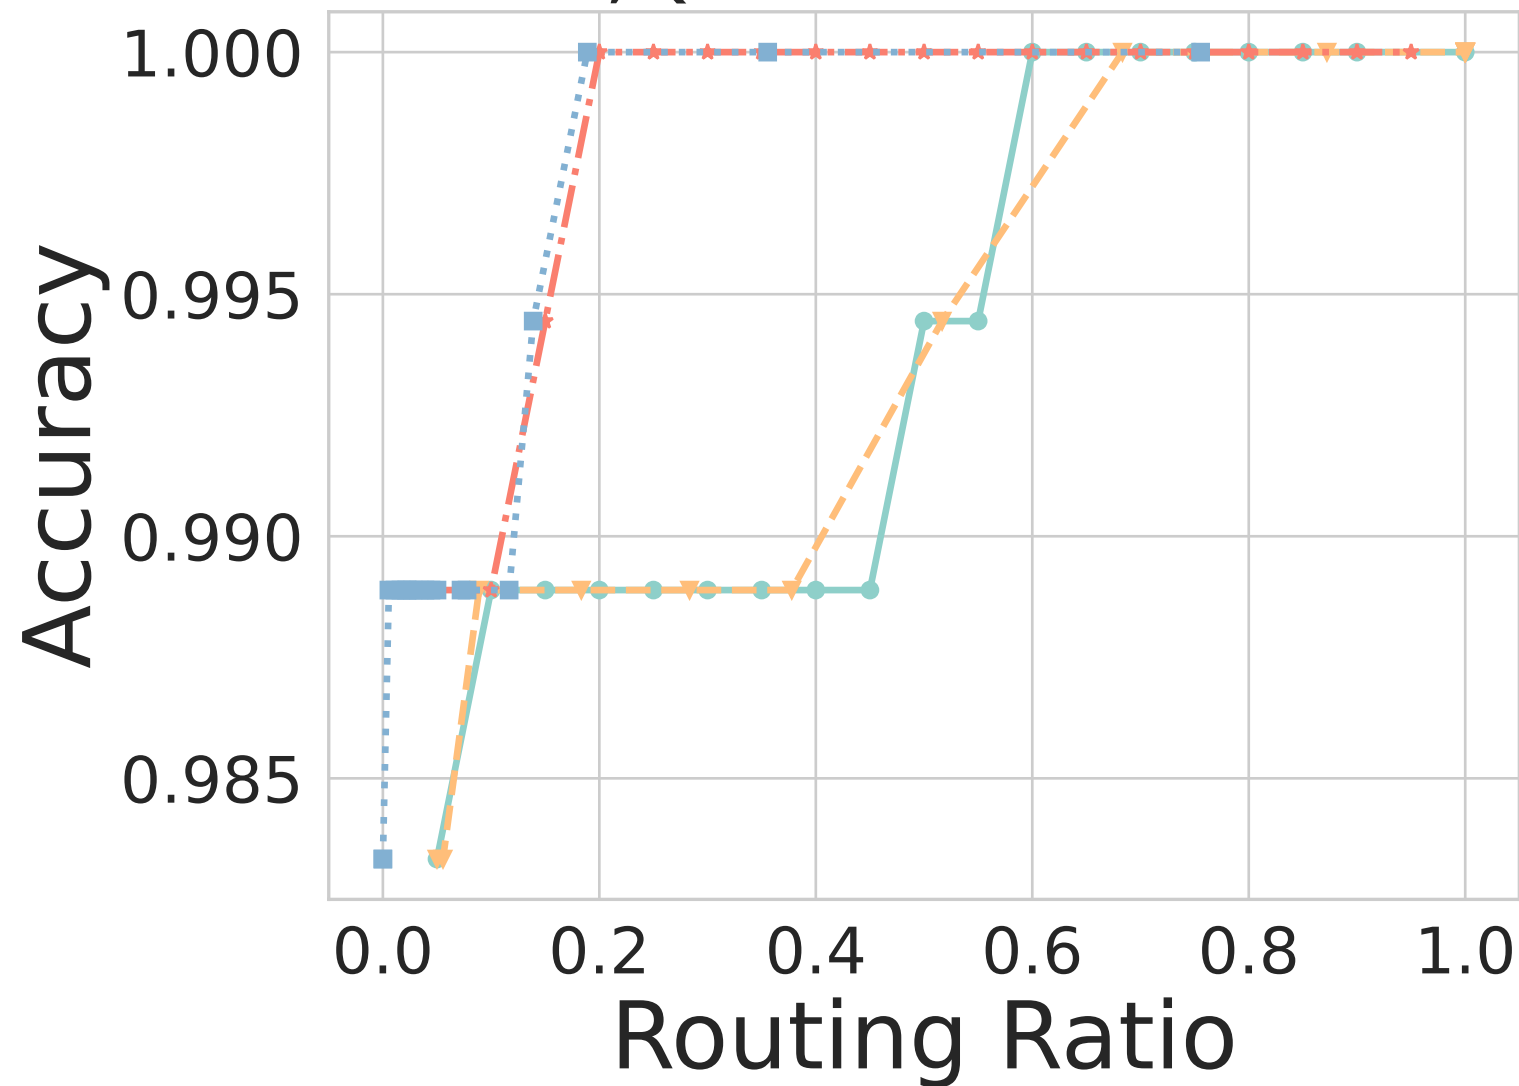

Supplement: supplementary_material [file cali_down_multiarith_Qwen3-1.7B_meta-llama_Llama-3.1-70B-Instruct.pdf › Routing_SLM_LLMs/Proxy_routing_prediction/to_meta-llama_Llama-3.1-70B-Instruct/multiarith_as_downstream/cali_down_multiarith_Qwen3-1.7B_meta-llama_Llama-3.1-70B-Instruct.pdf]

**MultiArith, Qwen3-4B to Llama-3.1-70B**

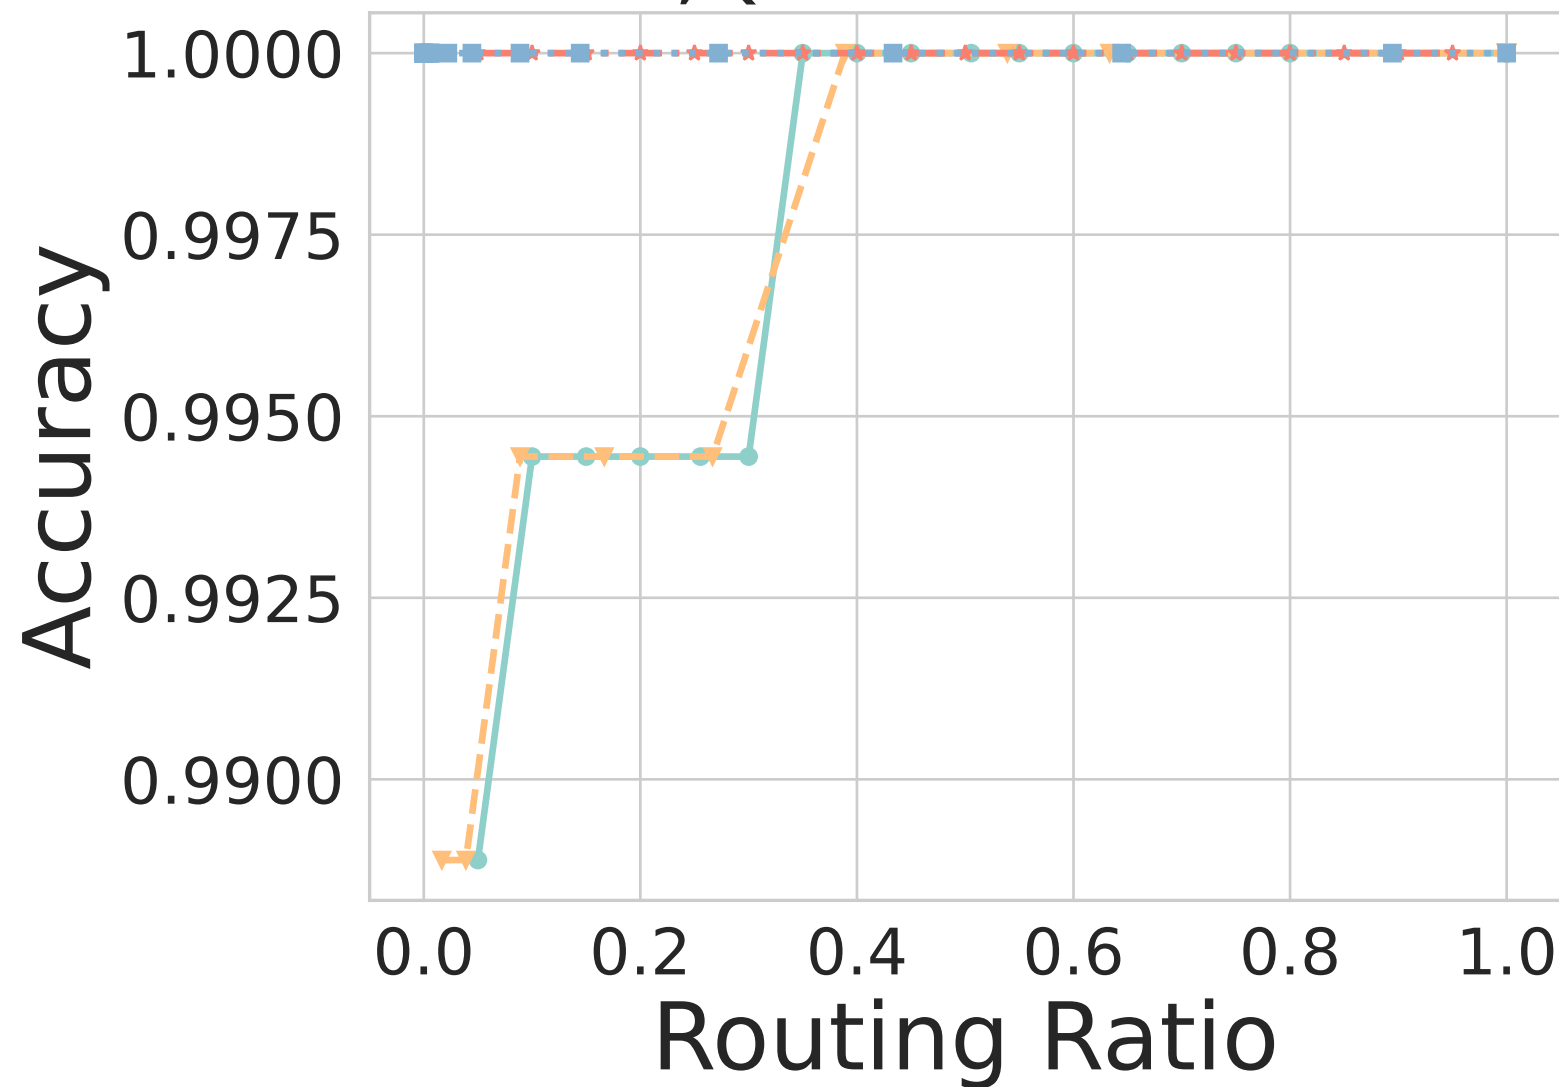

Supplement: supplementary_material [file cali_down_multiarith_Qwen3-4B_meta-llama_Llama-3.1-70B-Instruct.pdf › Routing_SLM_LLMs/Proxy_routing_prediction/to_meta-llama_Llama-3.1-70B-Instruct/multiarith_as_downstream/cali_down_multiarith_Qwen3-4B_meta-llama_Llama-3.1-70B-Instruct.pdf]

**MultiArith, granite-3.1-8b to Llama-3.1-70B**

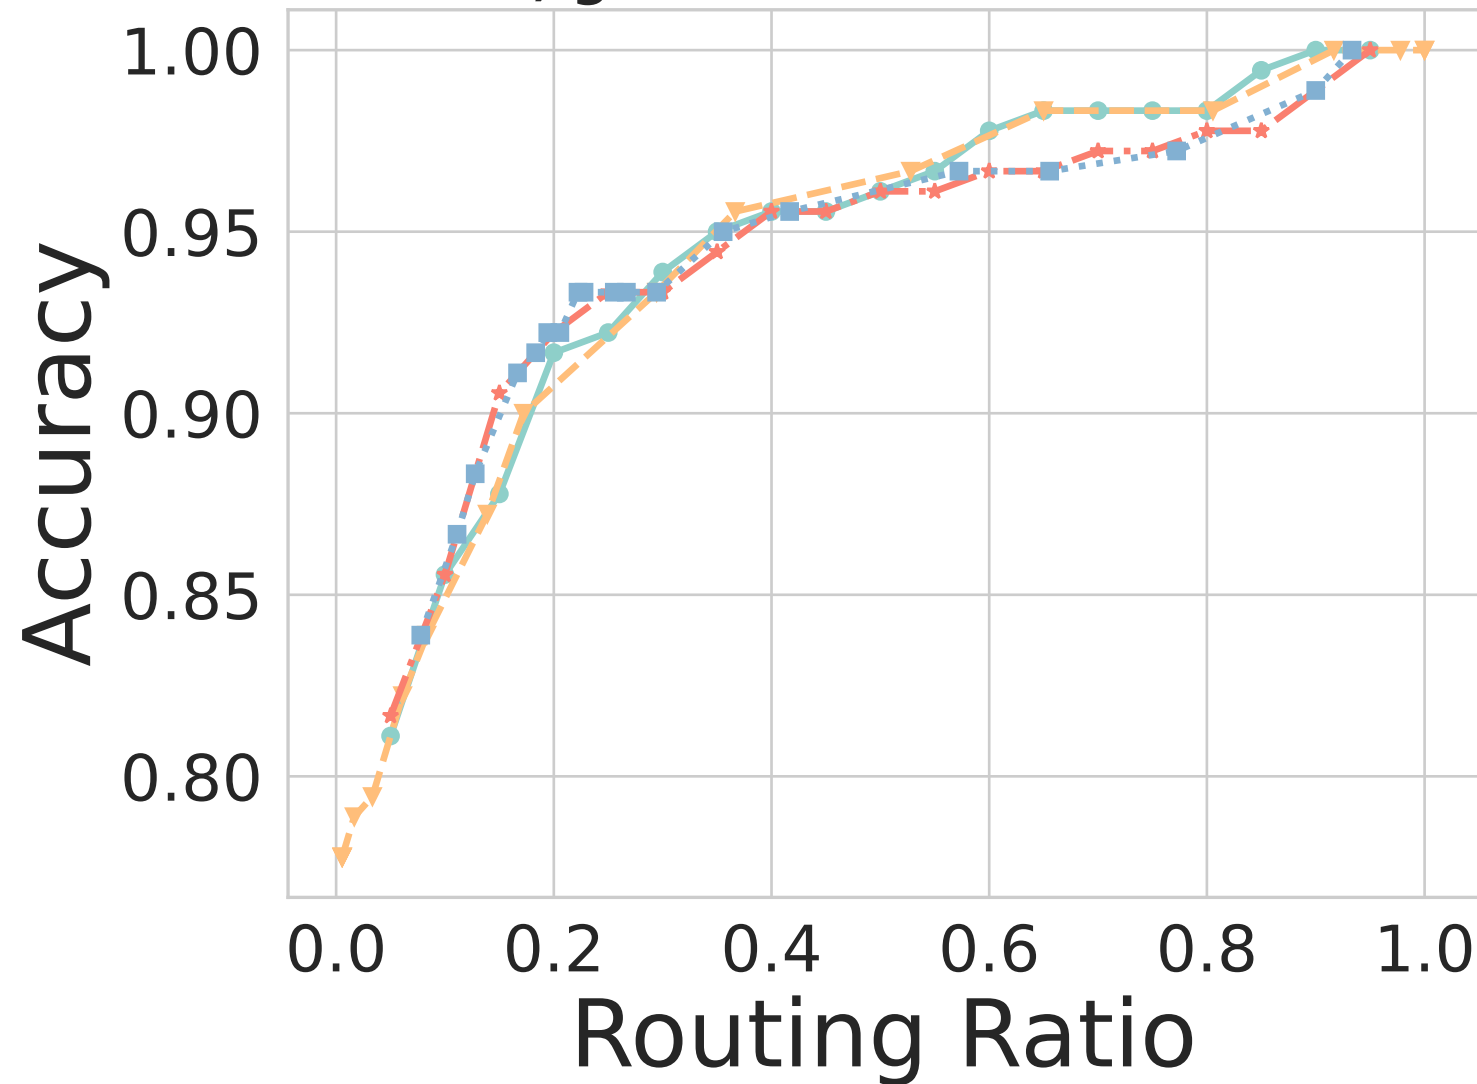

Supplement: supplementary_material [file cali_down_multiarith_granite-3.1-8b_meta-llama_Llama-3.1-70B-Instruct.pdf › Routing_SLM_LLMs/Proxy_routing_prediction/to_meta-llama_Llama-3.1-70B-Instruct/multiarith_as_downstream/cali_down_multiarith_granite-3.1-8b_meta-llama_Llama-3.1-70B-Instruct.pdf]

**MultiArith, llama-3.1-8b to Llama-3.1-70B**

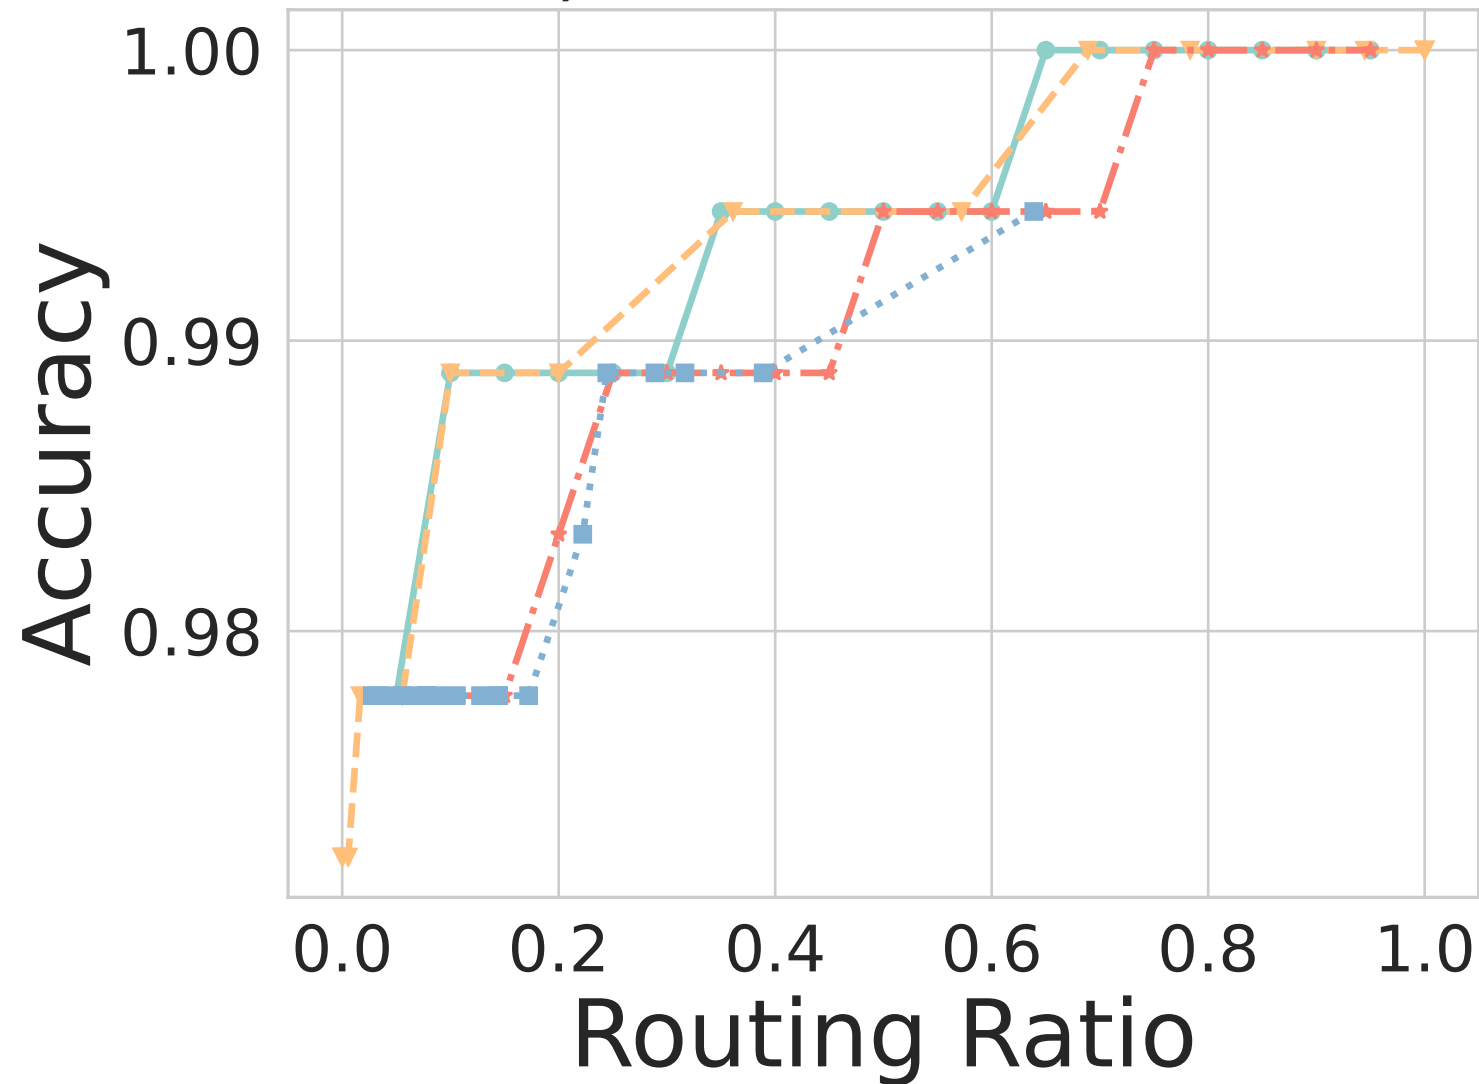

Supplement: supplementary_material [file cali_down_multiarith_llama-3.1-8b_meta-llama_Llama-3.1-70B-Instruct.pdf › Routing_SLM_LLMs/Proxy_routing_prediction/to_meta-llama_Llama-3.1-70B-Instruct/multiarith_as_downstream/cali_down_multiarith_llama-3.1-8b_meta-llama_Llama-3.1-70B-Instruct.pdf]

**MultiArith, llama-3.2-1b to Llama-3.1-70B**

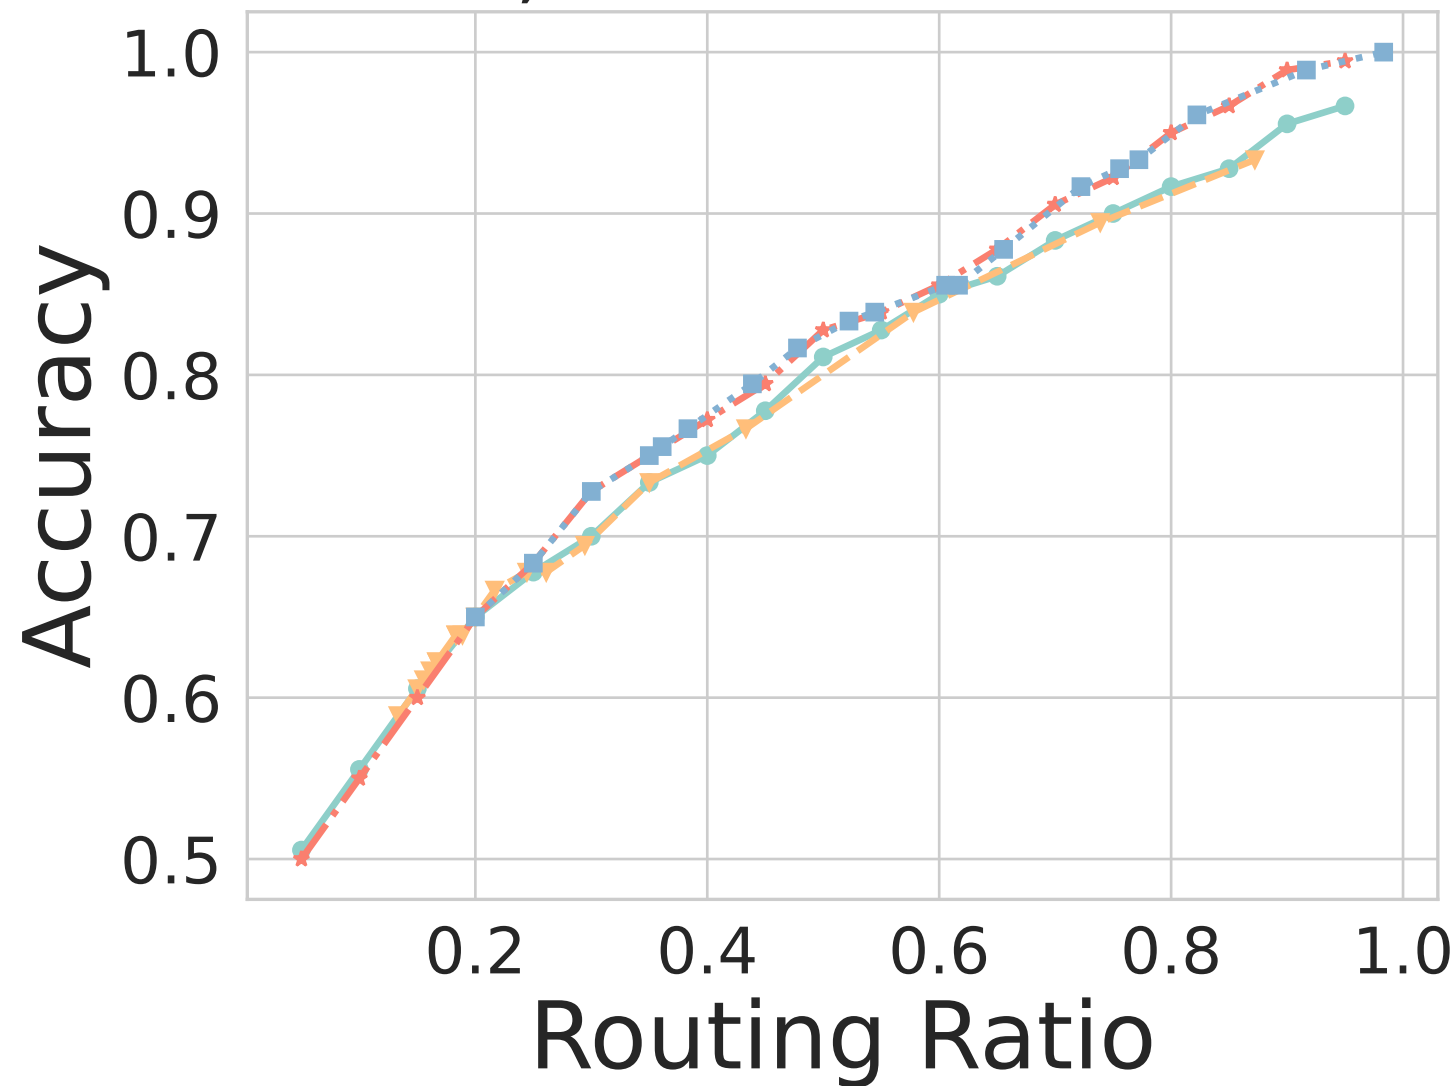

Supplement: supplementary_material [file cali_down_multiarith_llama-3.2-1b_meta-llama_Llama-3.1-70B-Instruct.pdf › Routing_SLM_LLMs/Proxy_routing_prediction/to_meta-llama_Llama-3.1-70B-Instruct/multiarith_as_downstream/cali_down_multiarith_llama-3.2-1b_meta-llama_Llama-3.1-70B-Instruct.pdf]

**MultiArith, llama-3.2-3b to Llama-3.1-70B**

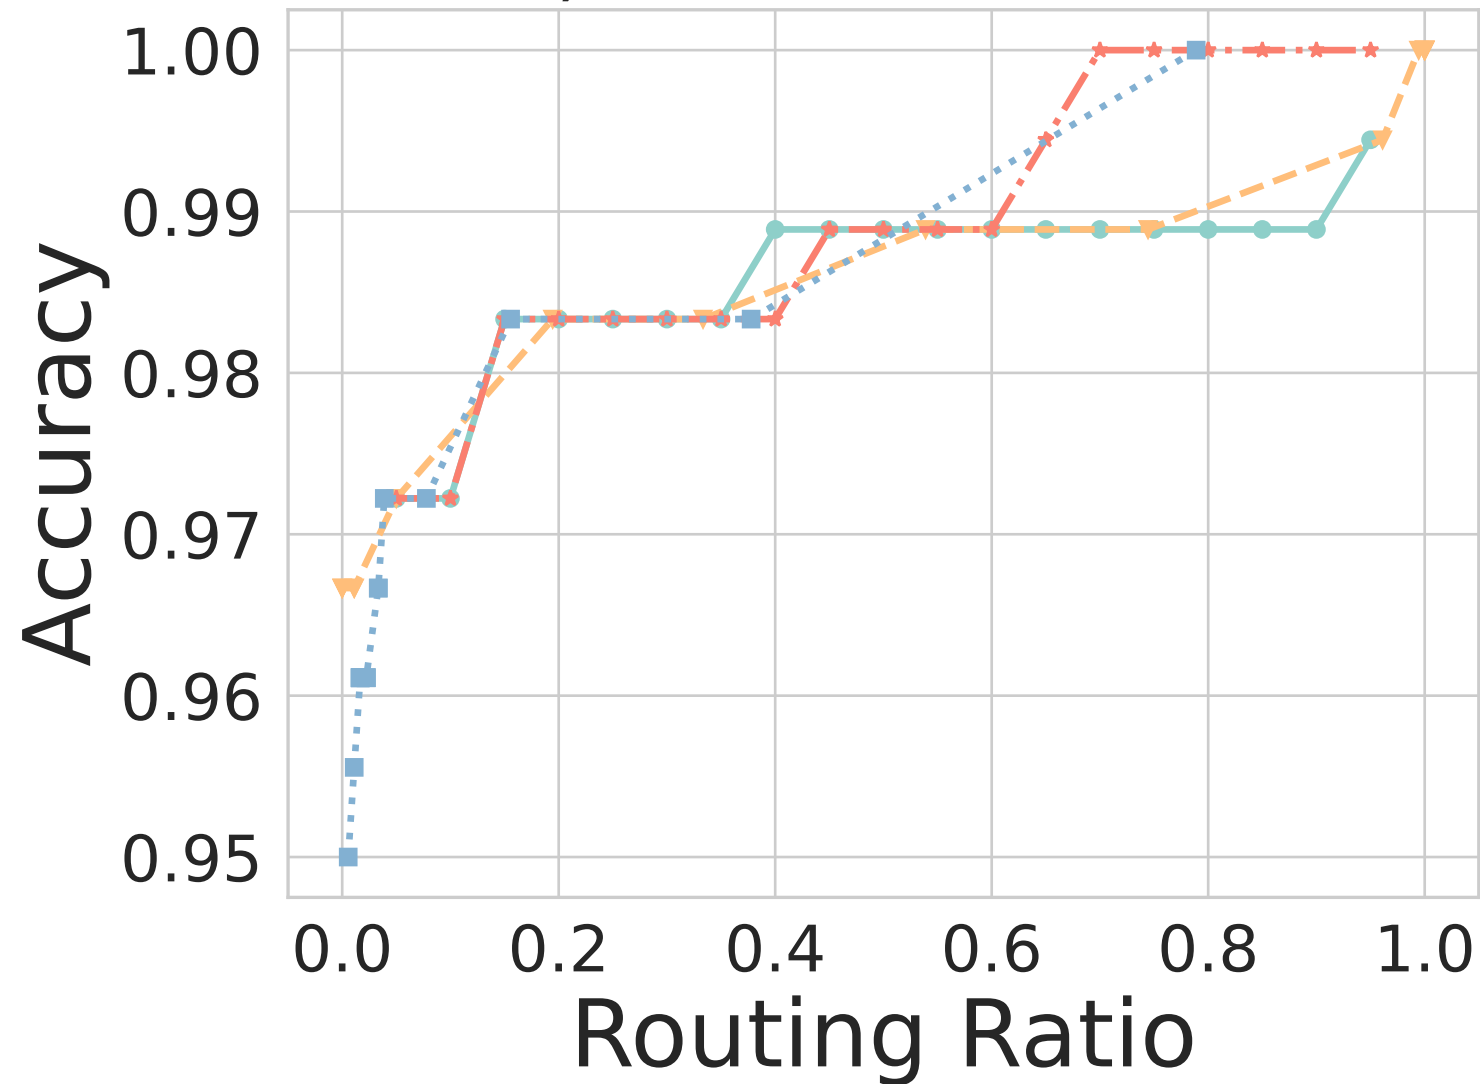

Supplement: supplementary_material [file cali_down_multiarith_llama-3.2-3b_meta-llama_Llama-3.1-70B-Instruct.pdf › Routing_SLM_LLMs/Proxy_routing_prediction/to_meta-llama_Llama-3.1-70B-Instruct/multiarith_as_downstream/cali_down_multiarith_llama-3.2-3b_meta-llama_Llama-3.1-70B-Instruct.pdf]

**MultiArith, mistral-7b to Llama-3.1-70B**

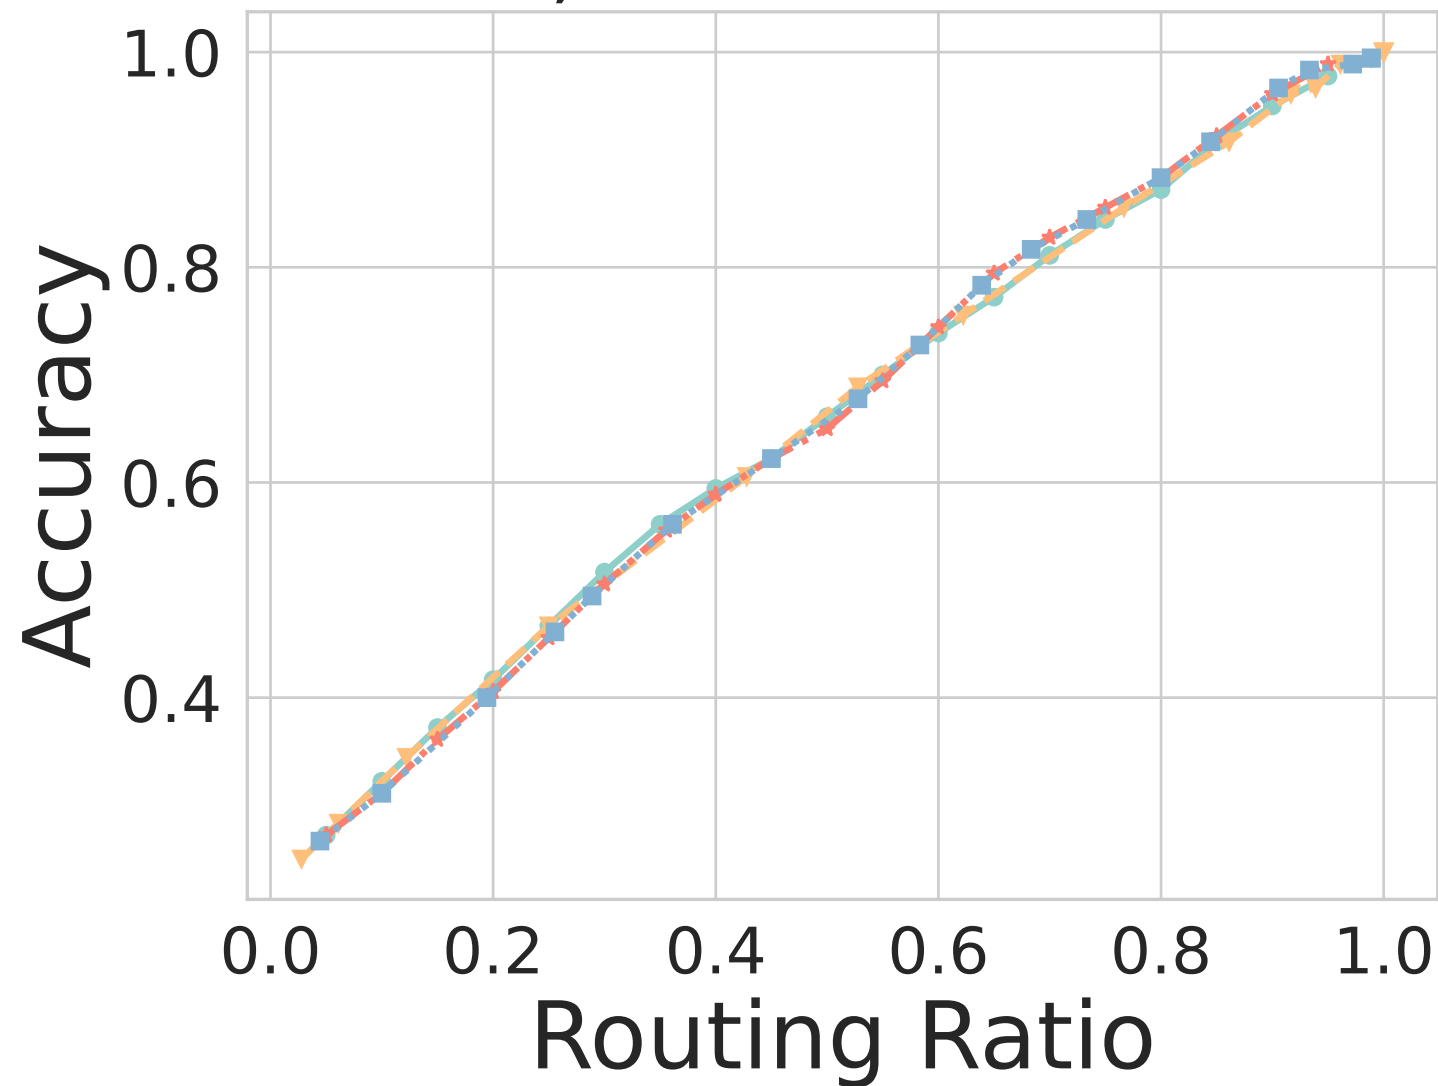

Supplement: supplementary_material [file cali_down_multiarith_mistral-7b_meta-llama_Llama-3.1-70B-Instruct.pdf › Routing_SLM_LLMs/Proxy_routing_prediction/to_meta-llama_Llama-3.1-70B-Instruct/multiarith_as_downstream/cali_down_multiarith_mistral-7b_meta-llama_Llama-3.1-70B-Instruct.pdf]

**MultiArith, phi-3.5-mini to Llama-3.1-70B**

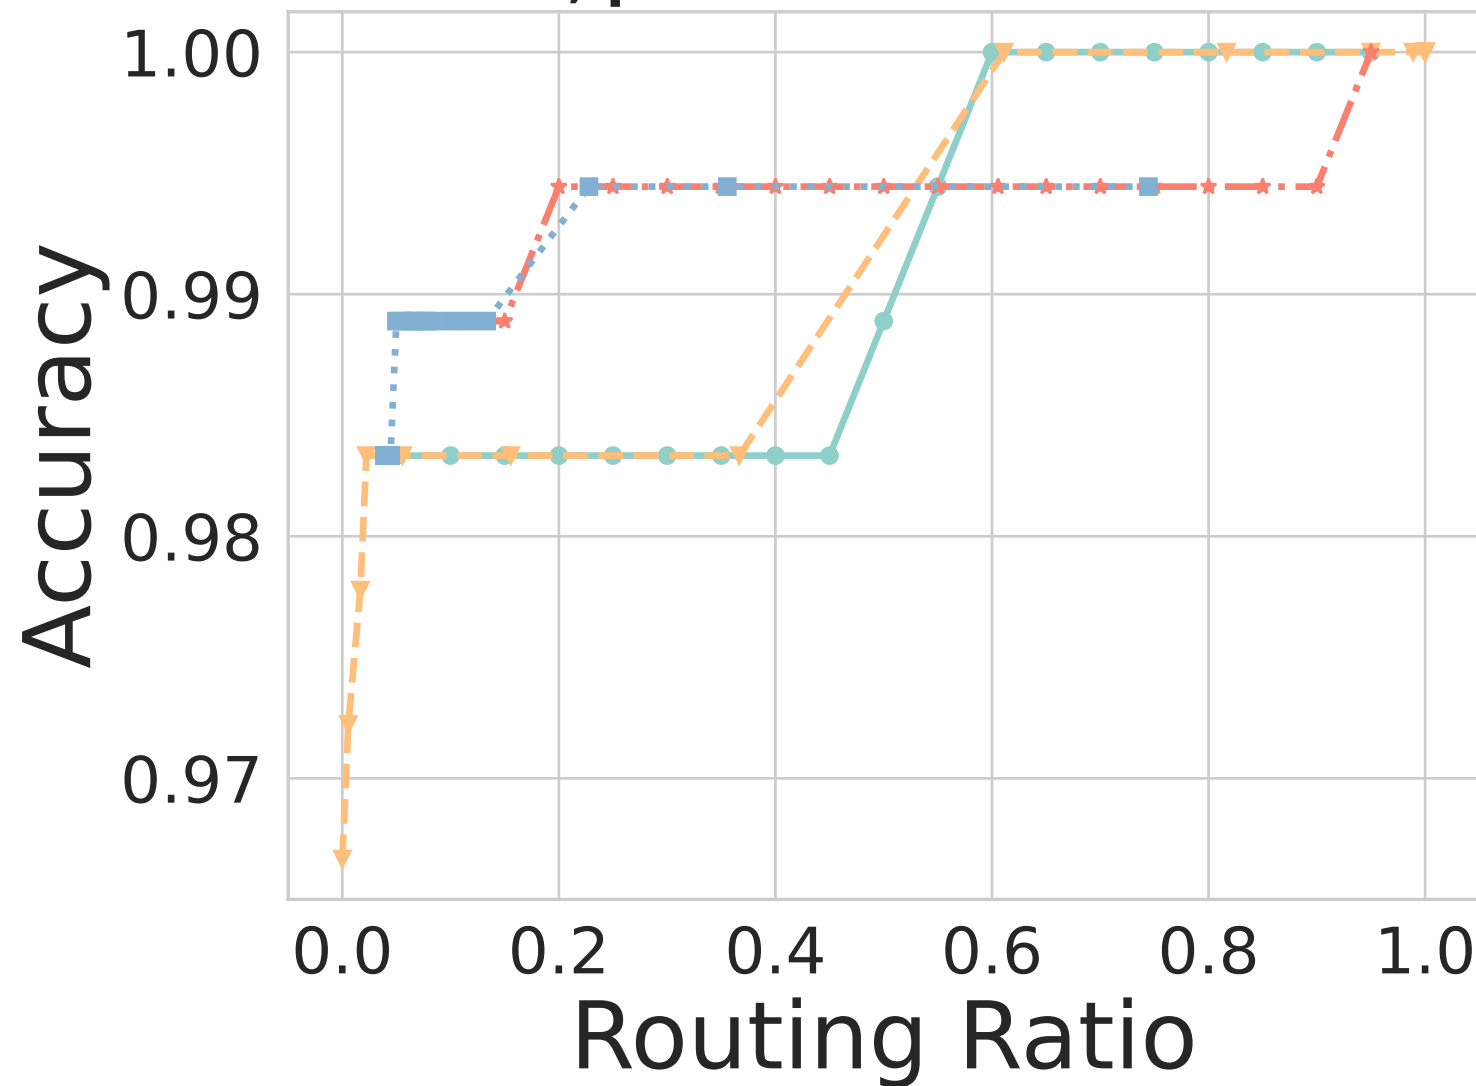

Supplement: supplementary_material [file cali_down_multiarith_phi-3.5-mini_meta-llama_Llama-3.1-70B-Instruct.pdf › Routing_SLM_LLMs/Proxy_routing_prediction/to_meta-llama_Llama-3.1-70B-Instruct/multiarith_as_downstream/cali_down_multiarith_phi-3.5-mini_meta-llama_Llama-3.1-70B-Instruct.pdf]

# MultiArith, phi-4-mini-reasoning to Llama-3.1-70B

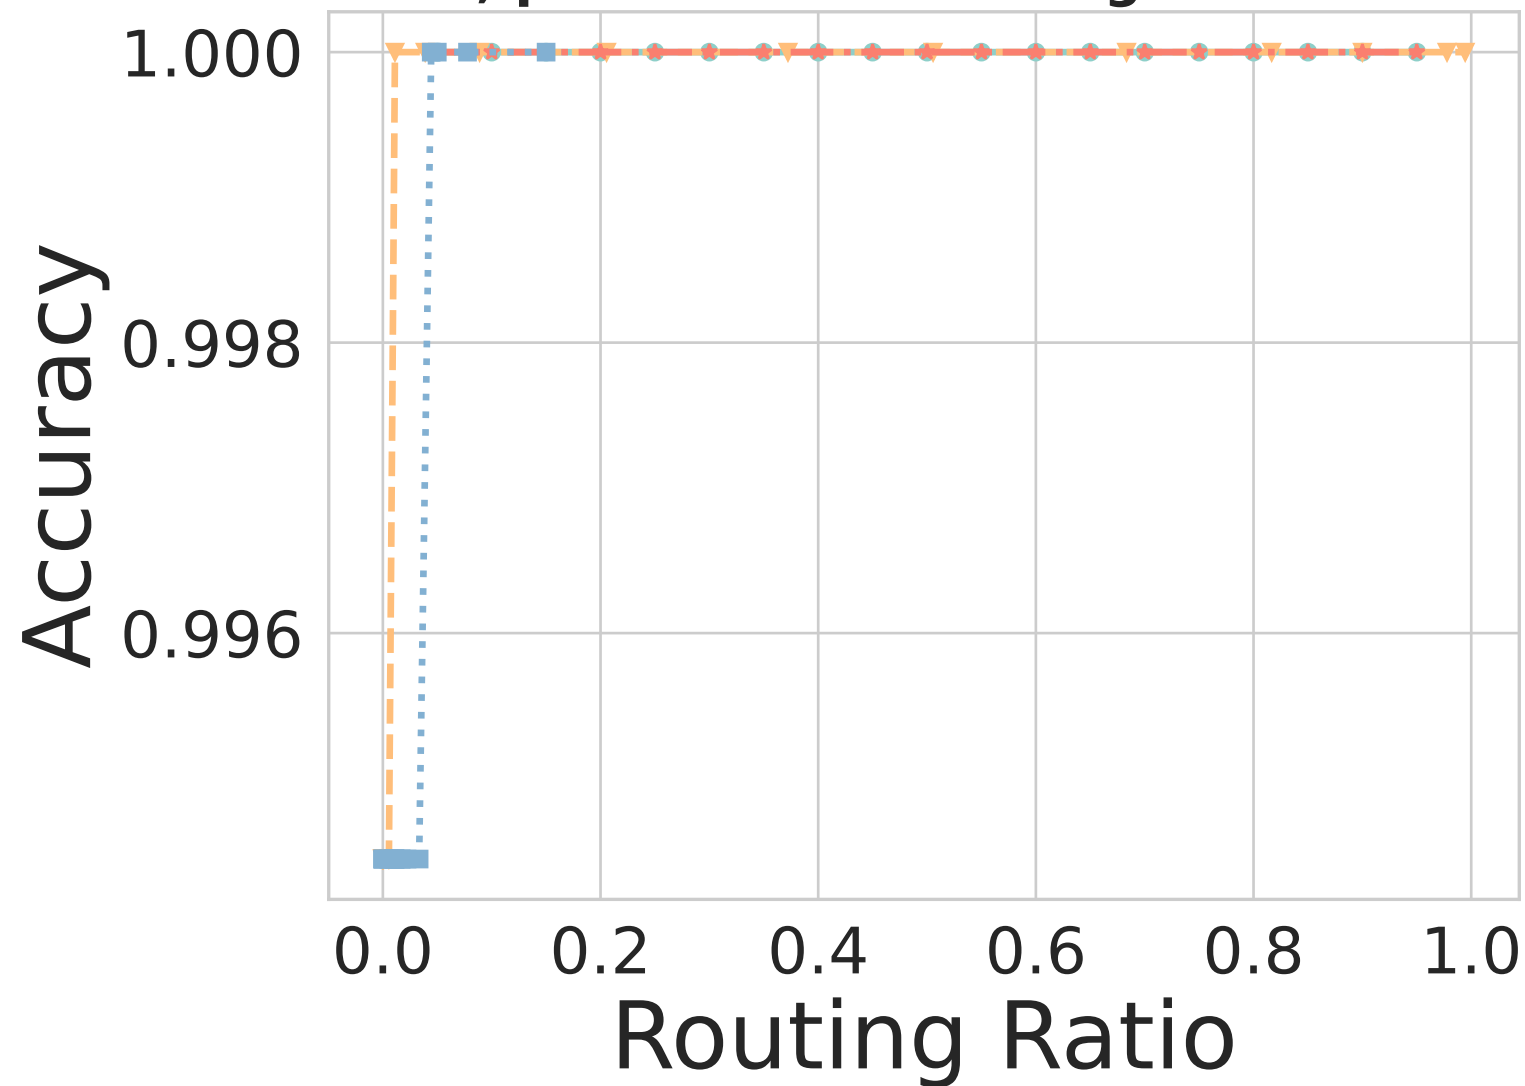

Supplement: supplementary_material [file cali_down_multiarith_phi-4-mini-reasoning_meta-llama_Llama-3.1-70B-Instruct.pdf › Routing_SLM_LLMs/Proxy_routing_prediction/to_meta-llama_Llama-3.1-70B-Instruct/multiarith_as_downstream/cali_down_multiarith_phi-4-mini-reasoning_meta-llama_Llama-3.1-70B-Instruct.pdf]

**MultiArith, qwen-2.5-7b to Llama-3.1-70B**

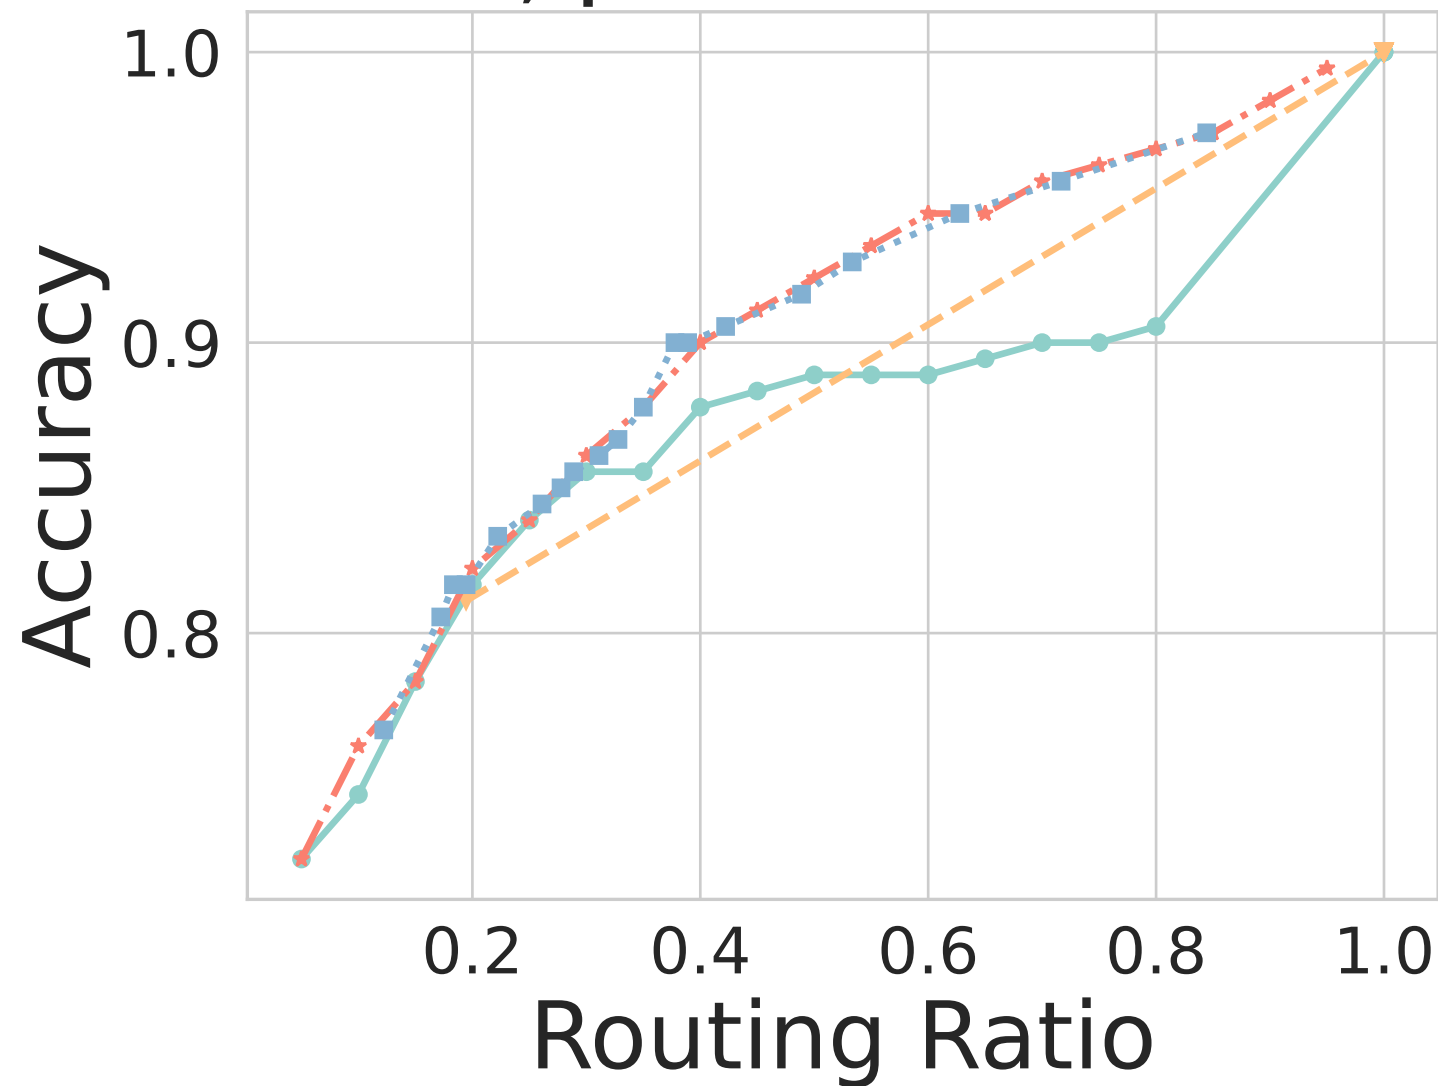

Supplement: supplementary_material [file cali_down_multiarith_qwen-2.5-7b_meta-llama_Llama-3.1-70B-Instruct.pdf › Routing_SLM_LLMs/Proxy_routing_prediction/to_meta-llama_Llama-3.1-70B-Instruct/multiarith_as_downstream/cali_down_multiarith_qwen-2.5-7b_meta-llama_Llama-3.1-70B-Instruct.pdf]

**MultiArith, rwkv to Llama-3.1-70B**

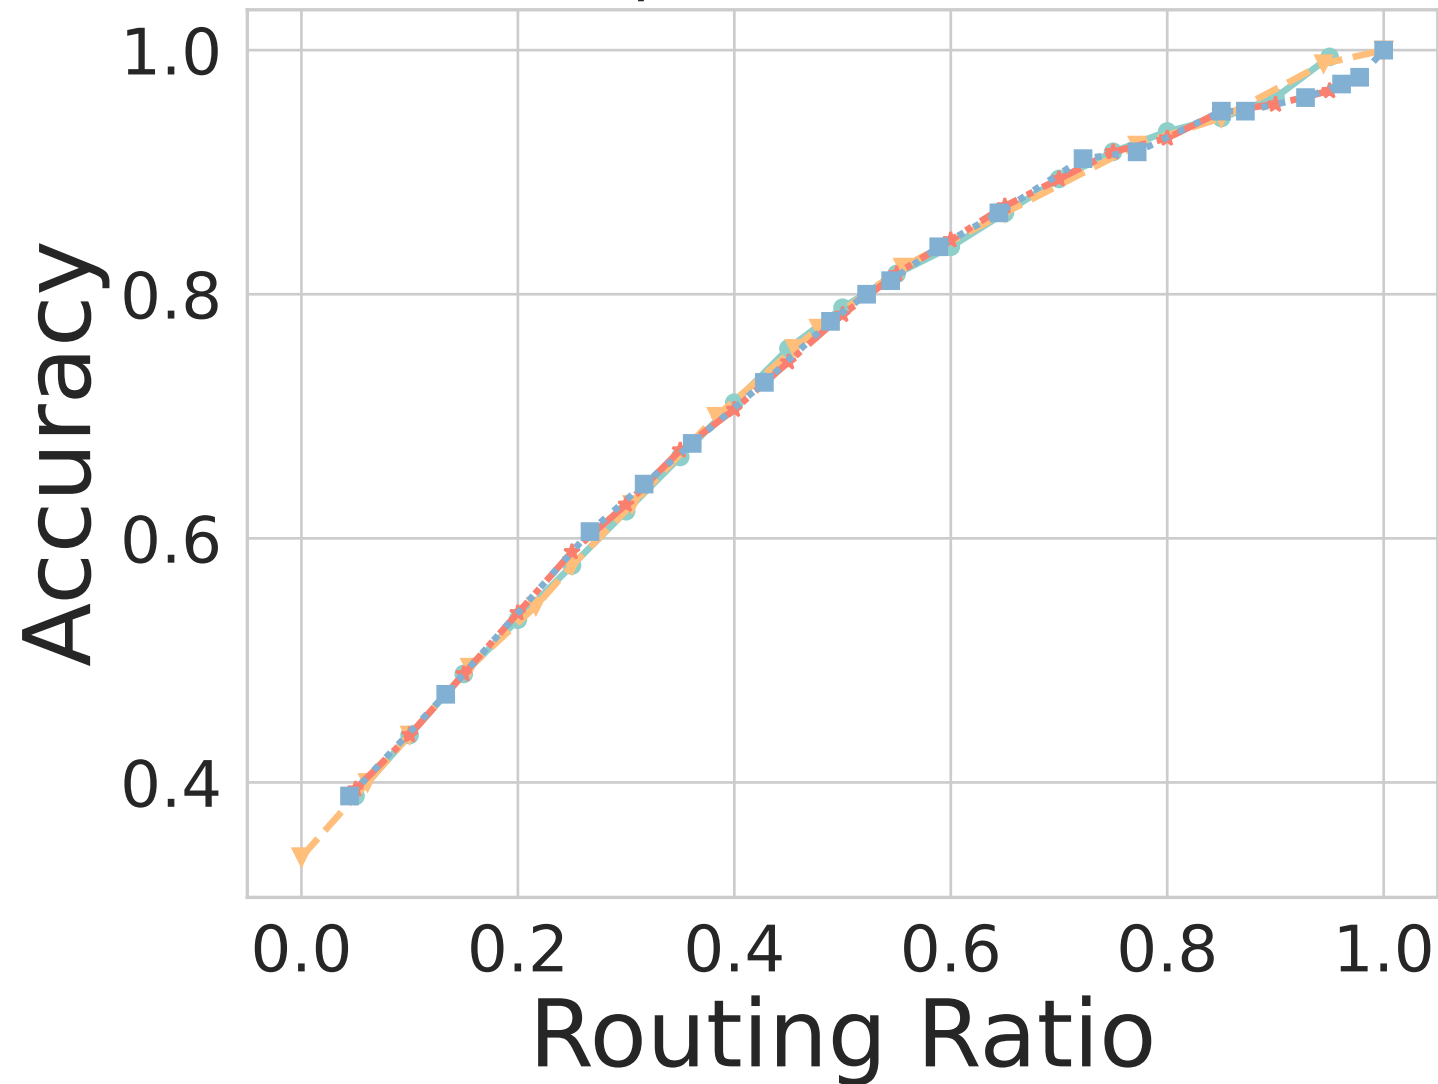

Supplement: supplementary_material [file cali_down_multiarith_rwkv_meta-llama_Llama-3.1-70B-Instruct.pdf › Routing_SLM_LLMs/Proxy_routing_prediction/to_meta-llama_Llama-3.1-70B-Instruct/multiarith_as_downstream/cali_down_multiarith_rwkv_meta-llama_Llama-3.1-70B-Instruct.pdf]

OpenBookQA, Qwen3-0.6B to Llama-3.1-70B

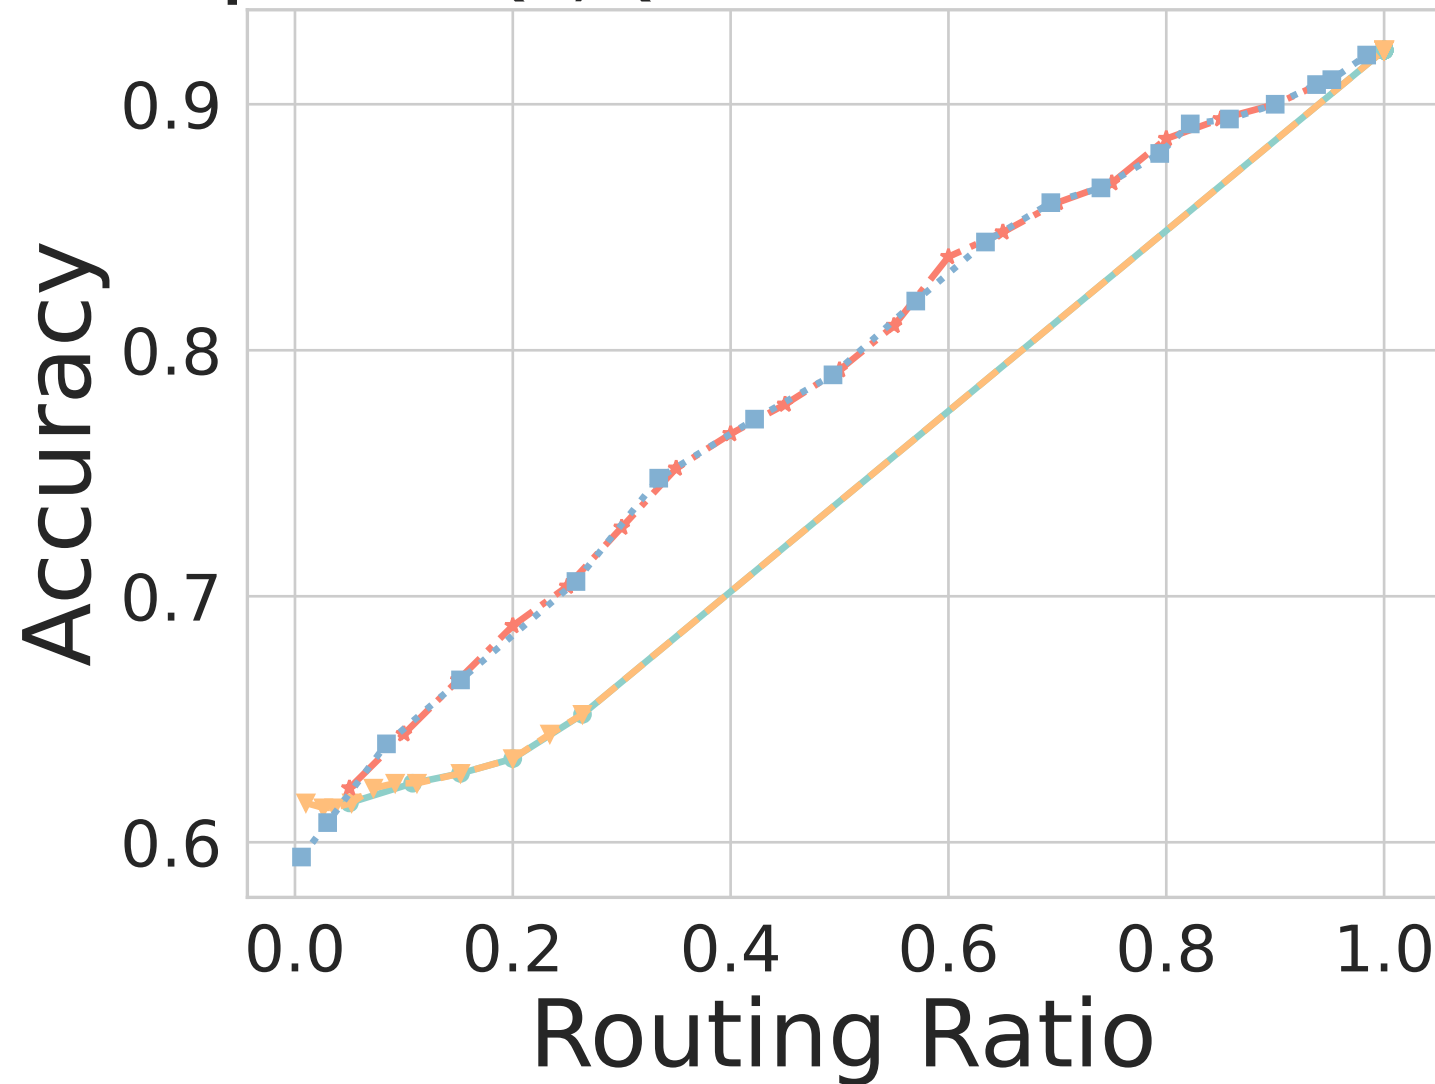

Supplement: supplementary_material [file cali_down_openbook_qa_Qwen3-0.6B_meta-llama_Llama-3.1-70B-Instruct.pdf › Routing_SLM_LLMs/Proxy_routing_prediction/to_meta-llama_Llama-3.1-70B-Instruct/openbook_qa_as_downstream/cali_down_openbook_qa_Qwen3-0.6B_meta-llama_Llama-3.1-70B-Instruct.pdf]

OpenBookQA, Qwen3-1.7B to Llama-3.1-70B

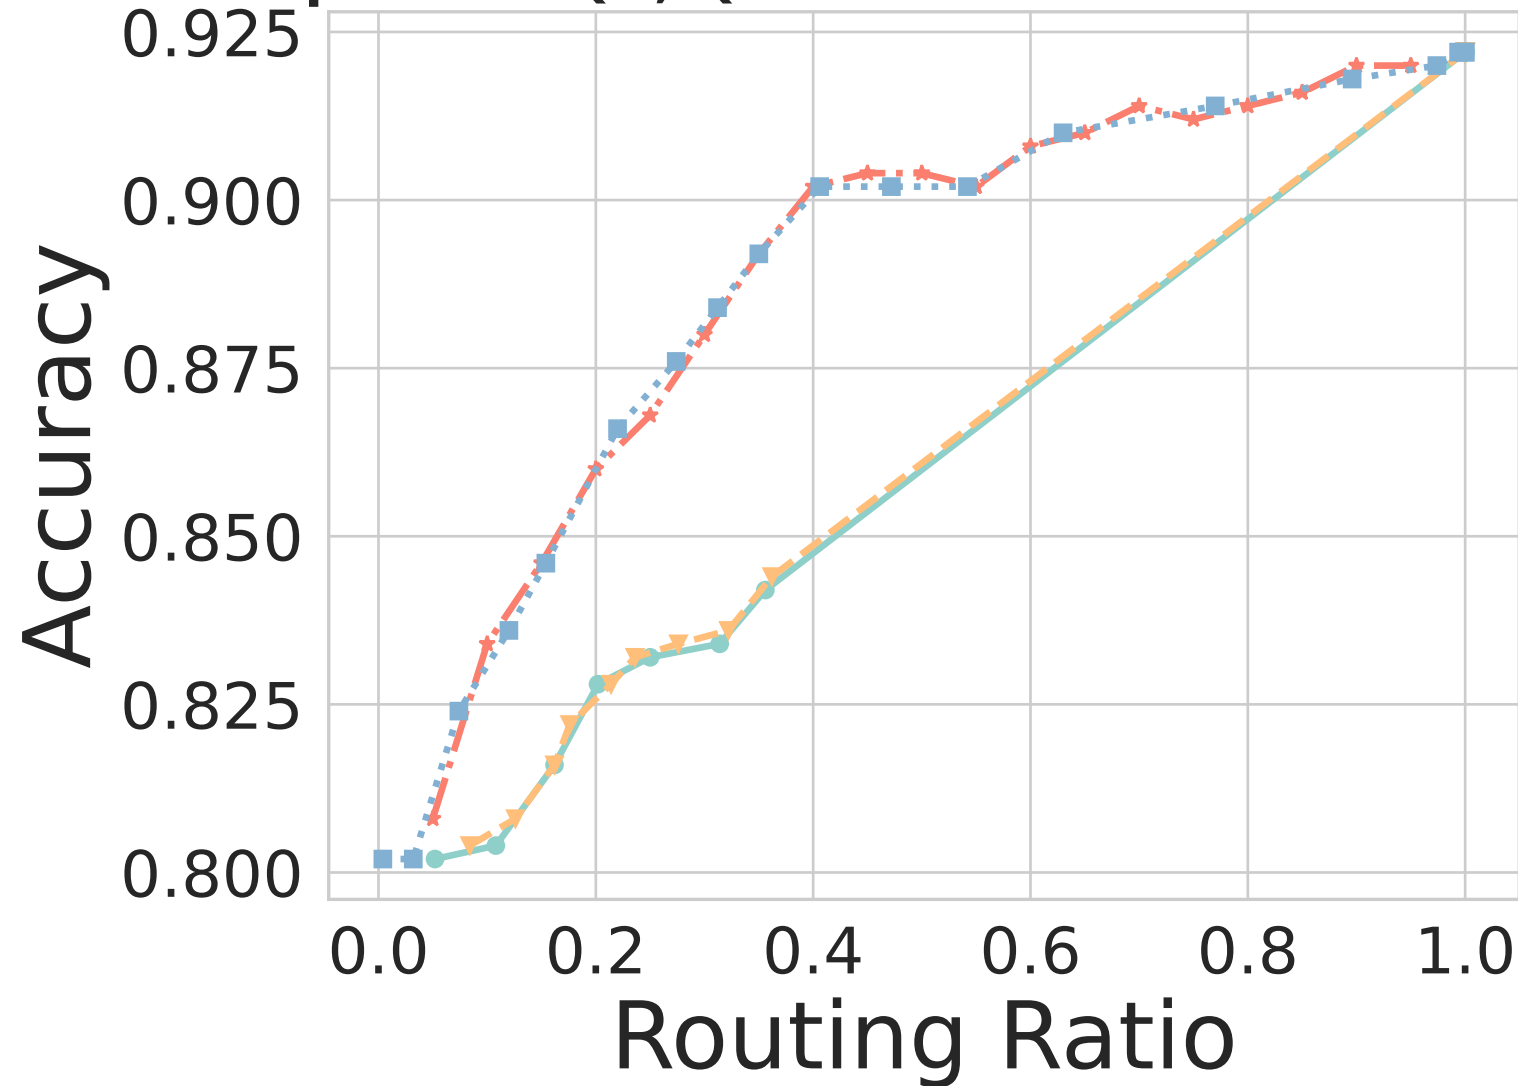

Supplement: supplementary_material [file cali_down_openbook_qa_Qwen3-1.7B_meta-llama_Llama-3.1-70B-Instruct.pdf › Routing_SLM_LLMs/Proxy_routing_prediction/to_meta-llama_Llama-3.1-70B-Instruct/openbook_qa_as_downstream/cali_down_openbook_qa_Qwen3-1.7B_meta-llama_Llama-3.1-70B-Instruct.pdf]

OpenBookQA, Qwen3-4B to Llama-3.1-70B

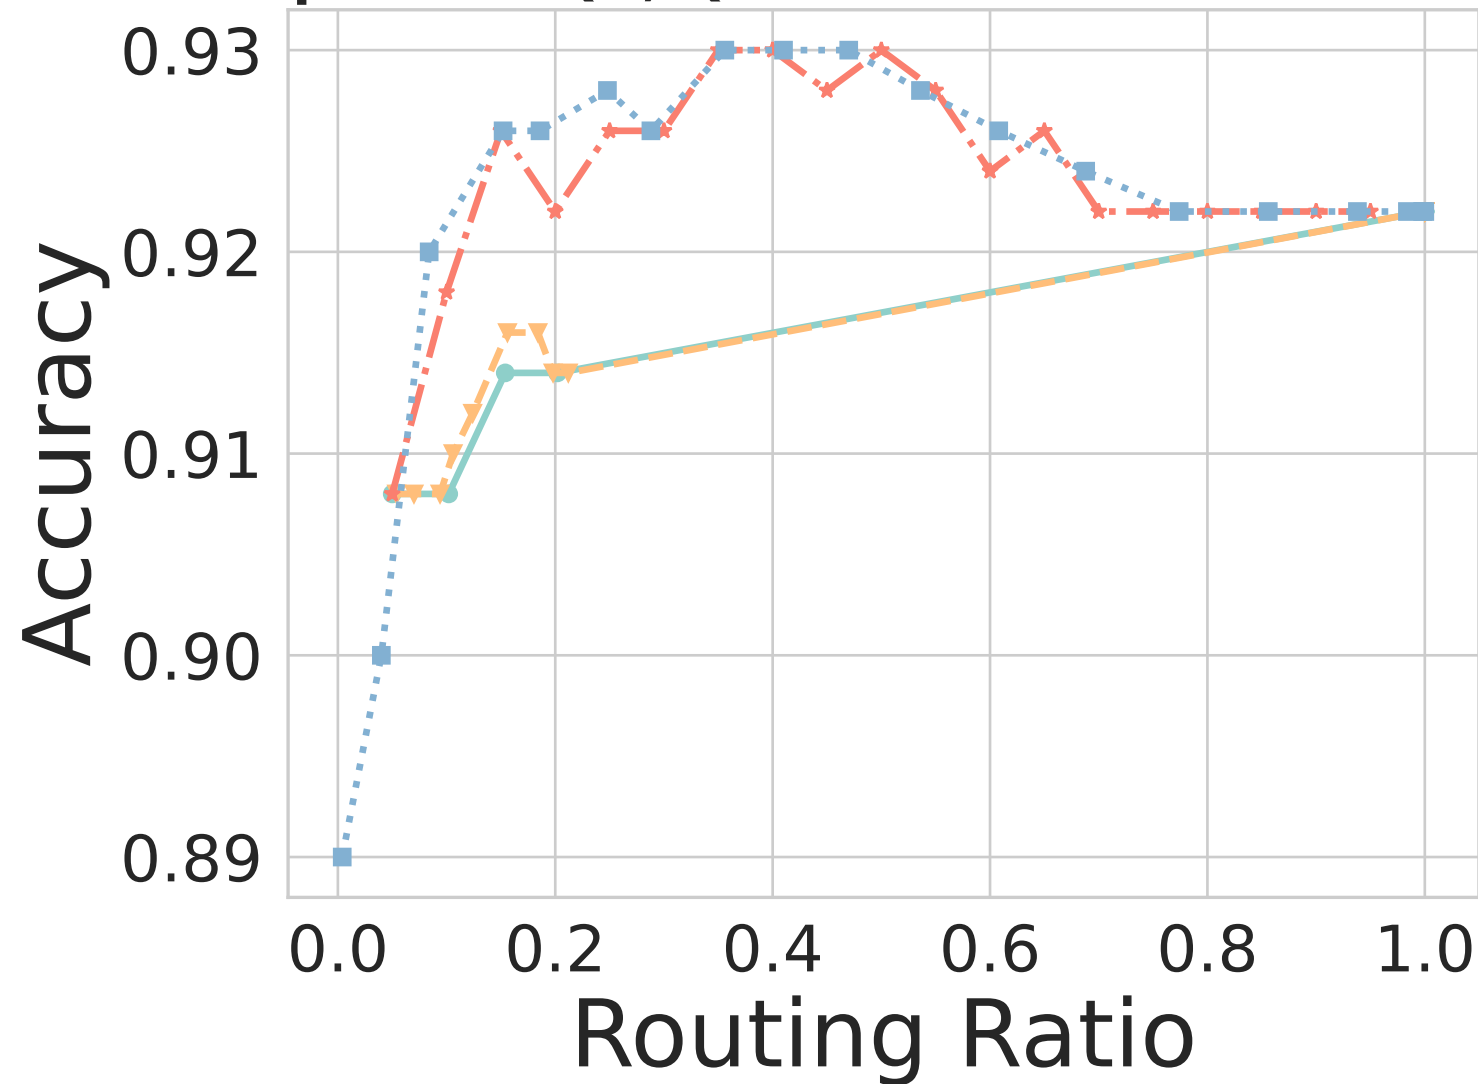

Supplement: supplementary_material [file cali_down_openbook_qa_Qwen3-4B_meta-llama_Llama-3.1-70B-Instruct.pdf › Routing_SLM_LLMs/Proxy_routing_prediction/to_meta-llama_Llama-3.1-70B-Instruct/openbook_qa_as_downstream/cali_down_openbook_qa_Qwen3-4B_meta-llama_Llama-3.1-70B-Instruct.pdf]

**OpenBookQA, granite-3.1-8b to Llama-3.1-70B**

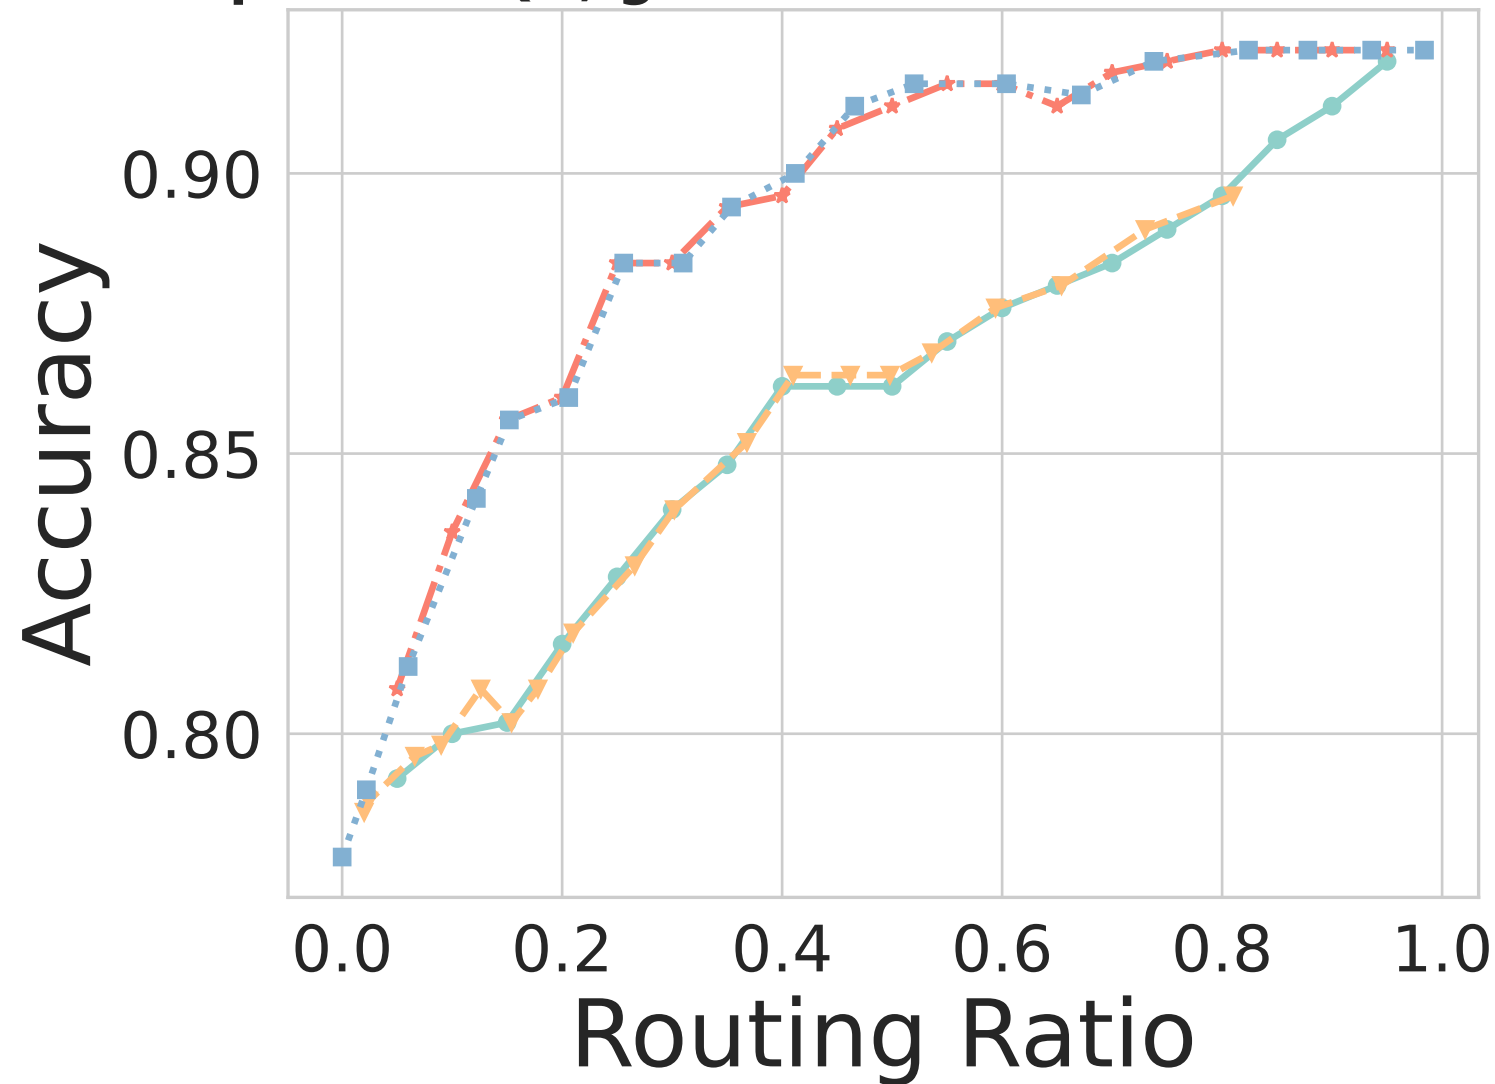

Supplement: supplementary_material [file cali_down_openbook_qa_granite-3.1-8b_meta-llama_Llama-3.1-70B-Instruct.pdf › Routing_SLM_LLMs/Proxy_routing_prediction/to_meta-llama_Llama-3.1-70B-Instruct/openbook_qa_as_downstream/cali_down_openbook_qa_granite-3.1-8b_meta-llama_Llama-3.1-70B-Instruct.pdf]

OpenBookQA, llama-3.1-8b to Llama-3.1-70B

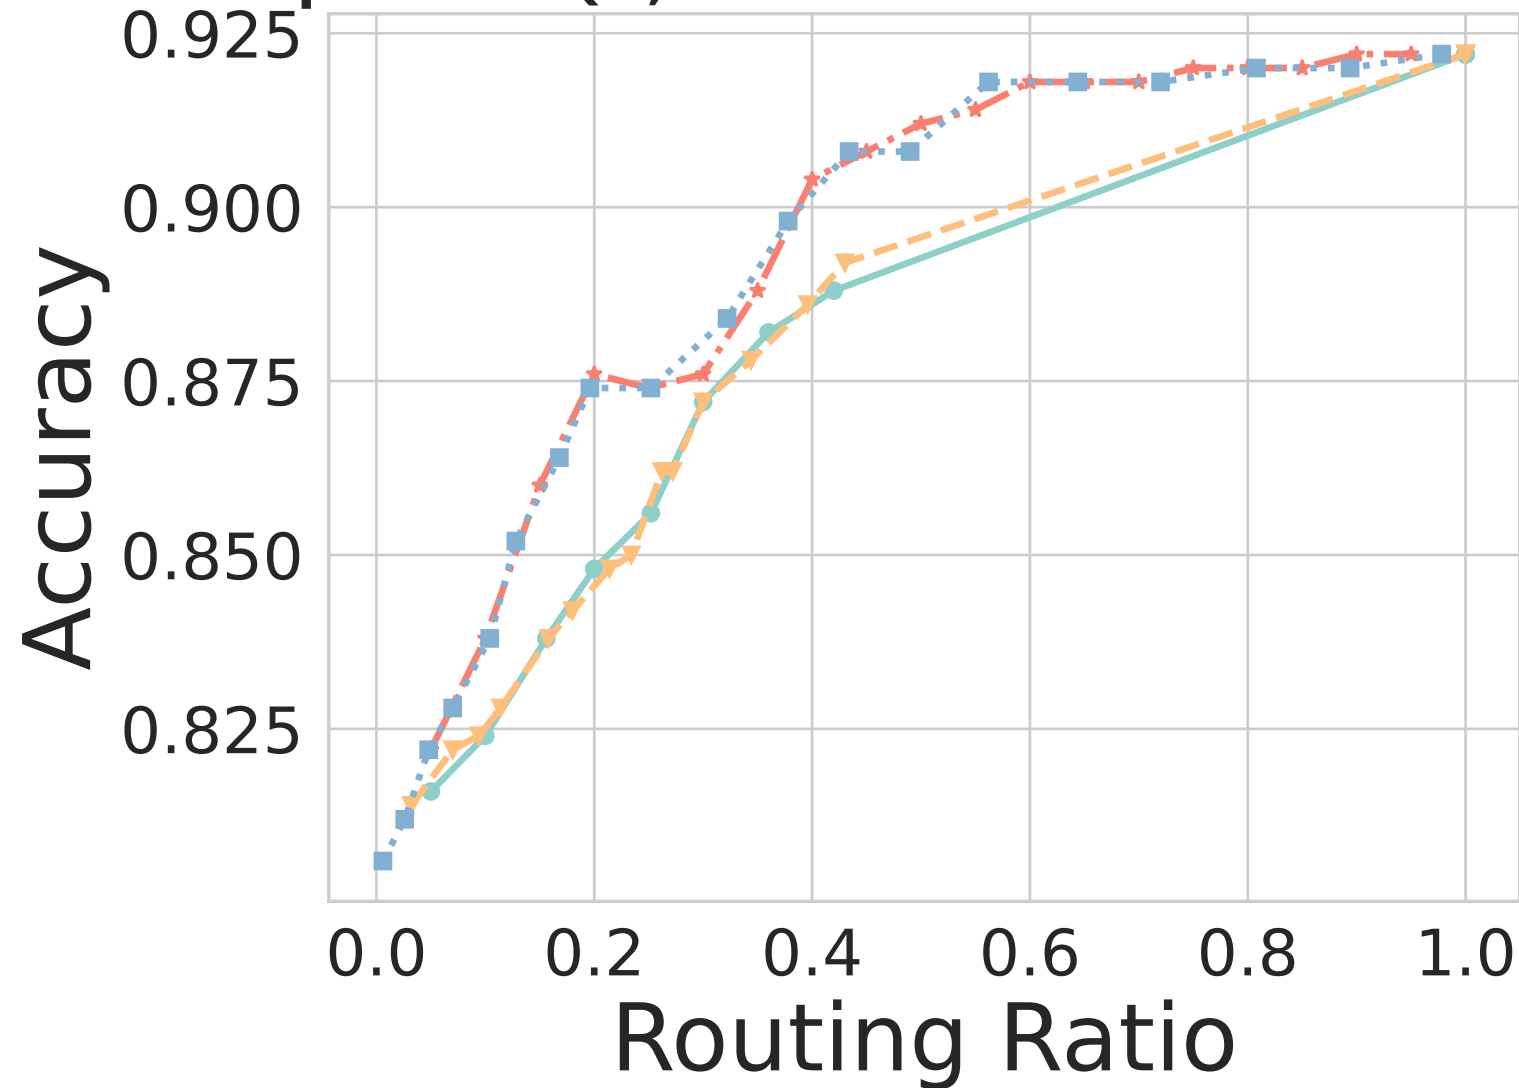

Supplement: supplementary_material [file cali_down_openbook_qa_llama-3.1-8b_meta-llama_Llama-3.1-70B-Instruct.pdf › Routing_SLM_LLMs/Proxy_routing_prediction/to_meta-llama_Llama-3.1-70B-Instruct/openbook_qa_as_downstream/cali_down_openbook_qa_llama-3.1-8b_meta-llama_Llama-3.1-70B-Instruct.pdf]

**OpenBookQA, llama-3.2-1b to Llama-3.1-70B**

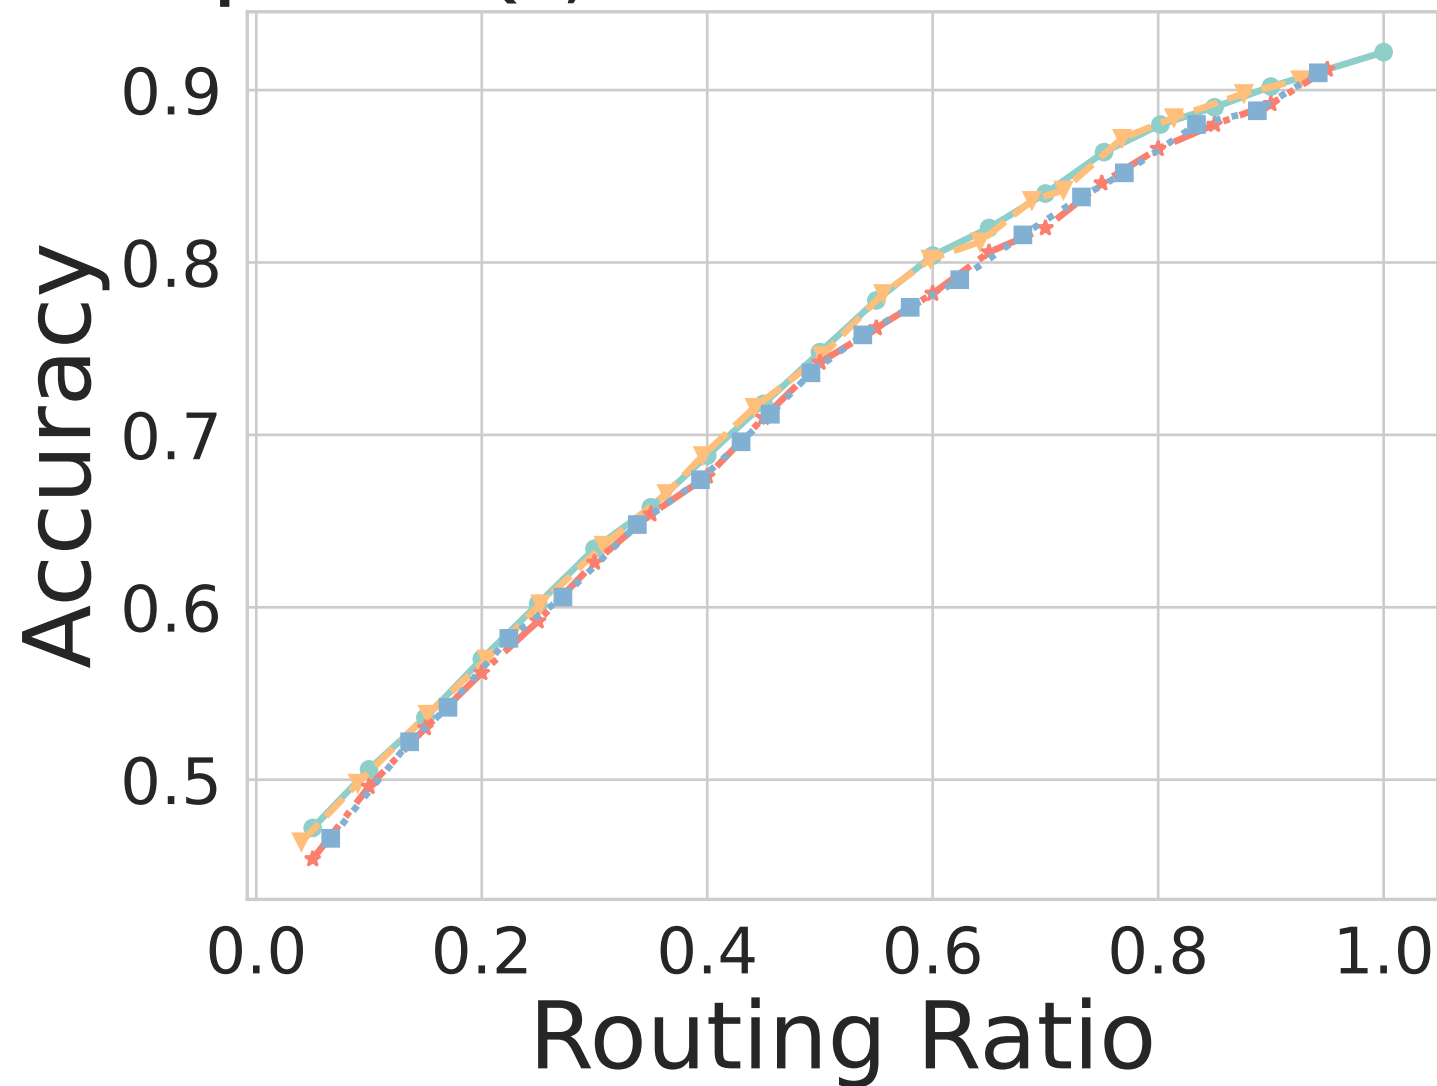

Supplement: supplementary_material [file cali_down_openbook_qa_llama-3.2-1b_meta-llama_Llama-3.1-70B-Instruct.pdf › Routing_SLM_LLMs/Proxy_routing_prediction/to_meta-llama_Llama-3.1-70B-Instruct/openbook_qa_as_downstream/cali_down_openbook_qa_llama-3.2-1b_meta-llama_Llama-3.1-70B-Instruct.pdf]

OpenBookQA, llama-3.2-3b to Llama-3.1-70B

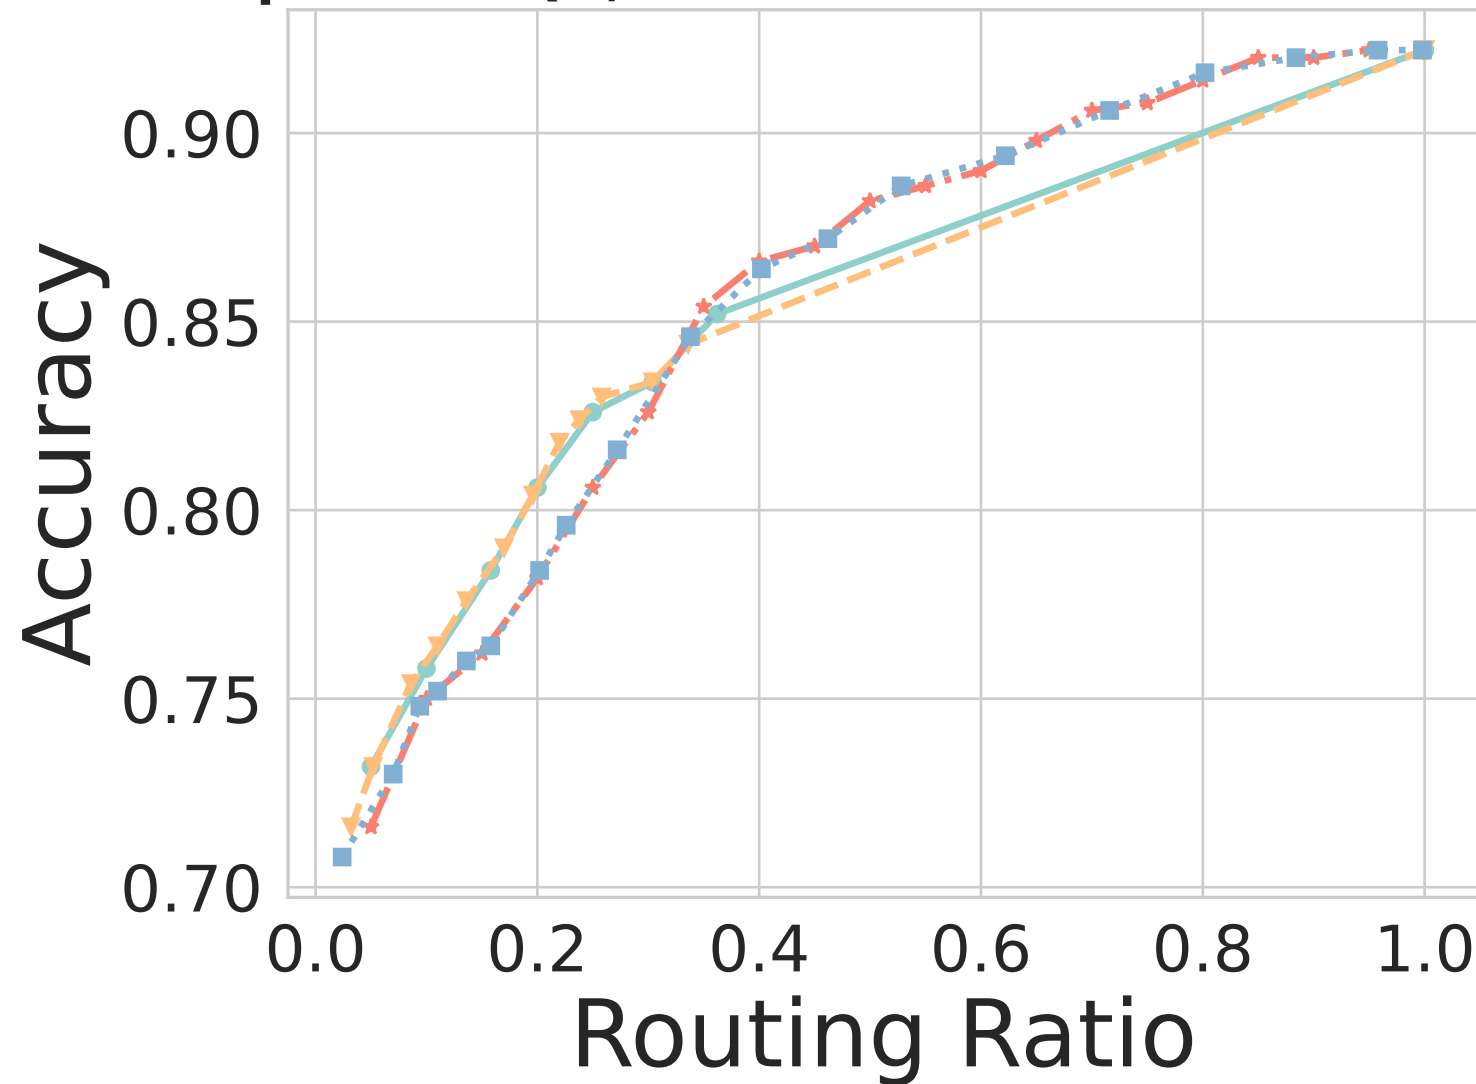

Supplement: supplementary_material [file cali_down_openbook_qa_llama-3.2-3b_meta-llama_Llama-3.1-70B-Instruct.pdf › Routing_SLM_LLMs/Proxy_routing_prediction/to_meta-llama_Llama-3.1-70B-Instruct/openbook_qa_as_downstream/cali_down_openbook_qa_llama-3.2-3b_meta-llama_Llama-3.1-70B-Instruct.pdf]

# OpenBookQA, mistral-7b to Llama-3.1-70B

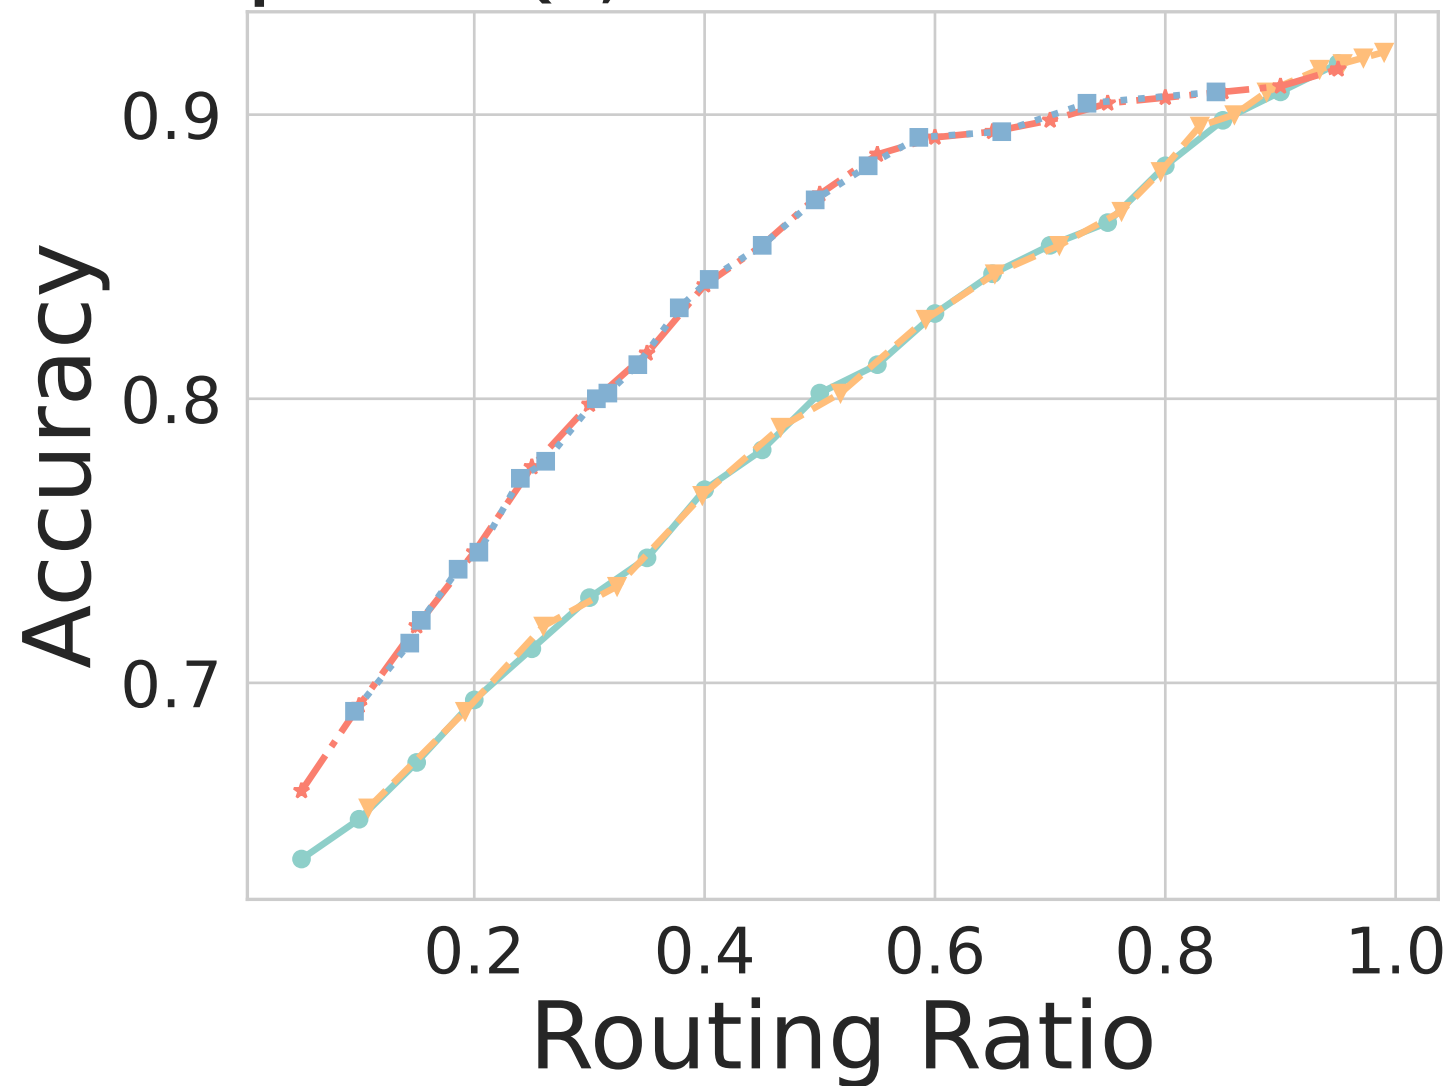

Supplement: supplementary_material [file cali_down_openbook_qa_mistral-7b_meta-llama_Llama-3.1-70B-Instruct.pdf › Routing_SLM_LLMs/Proxy_routing_prediction/to_meta-llama_Llama-3.1-70B-Instruct/openbook_qa_as_downstream/cali_down_openbook_qa_mistral-7b_meta-llama_Llama-3.1-70B-Instruct.pdf]

OpenBookQA, phi-3.5-mini to Llama-3.1-70B

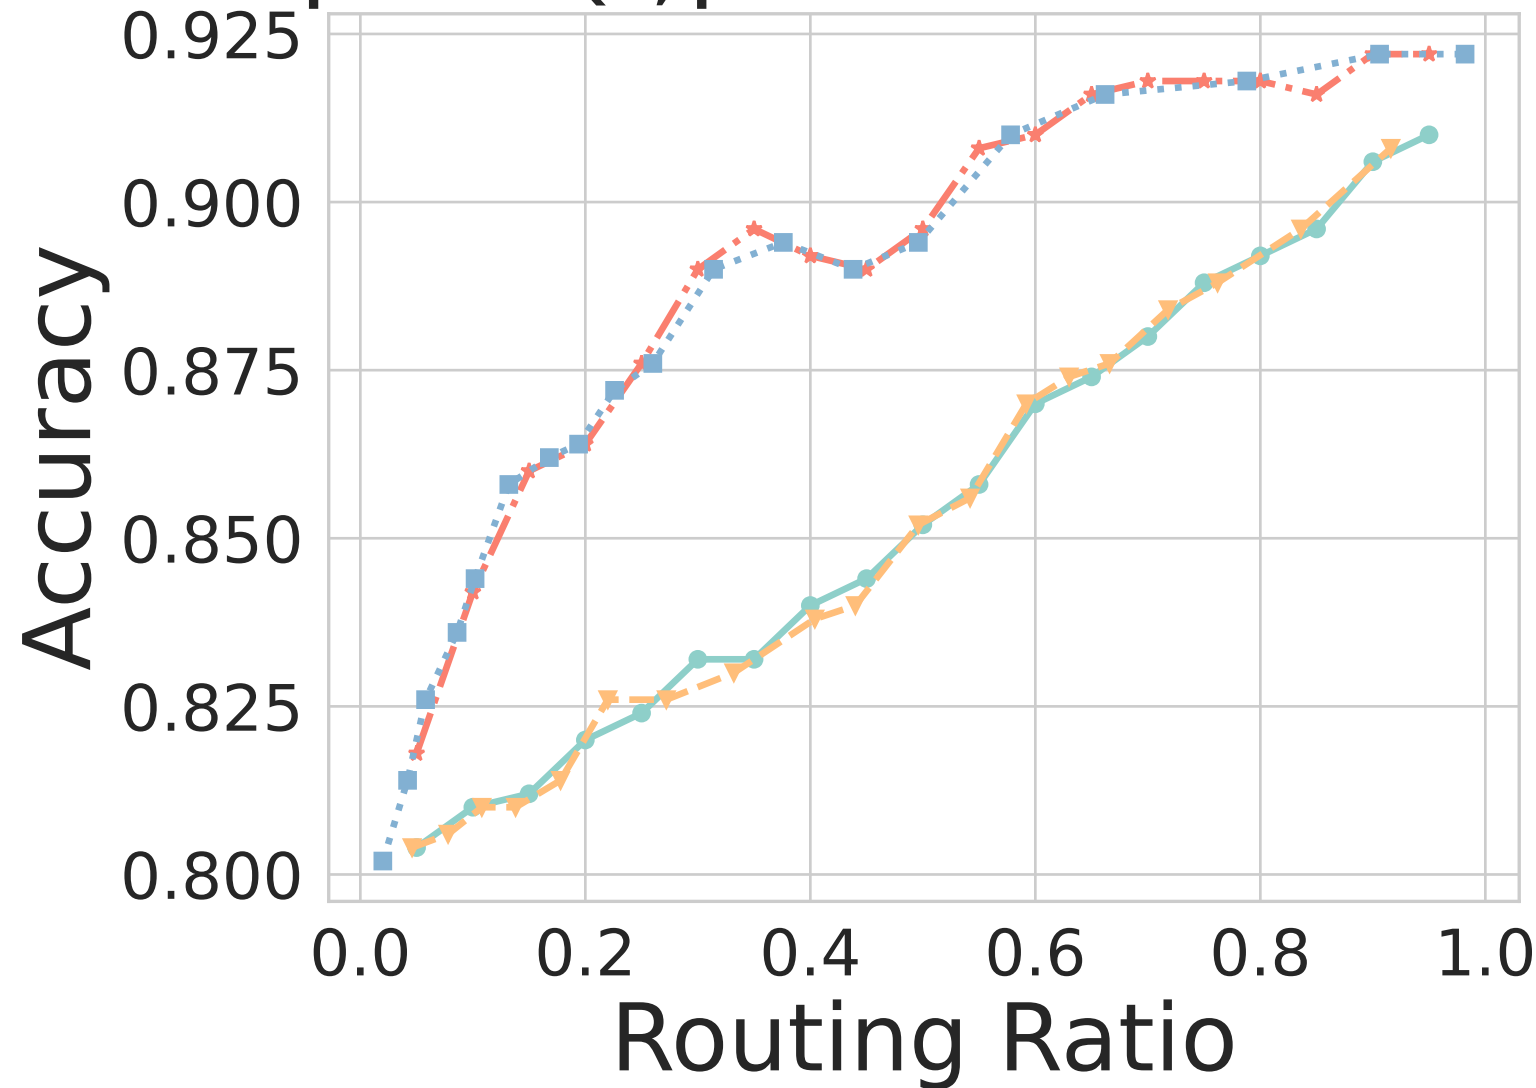

Supplement: supplementary_material [file cali_down_openbook_qa_phi-3.5-mini_meta-llama_Llama-3.1-70B-Instruct.pdf › Routing_SLM_LLMs/Proxy_routing_prediction/to_meta-llama_Llama-3.1-70B-Instruct/openbook_qa_as_downstream/cali_down_openbook_qa_phi-3.5-mini_meta-llama_Llama-3.1-70B-Instruct.pdf]

# OpenBookQA, phi-4-mini-reasoning to Llama-3.1-70B

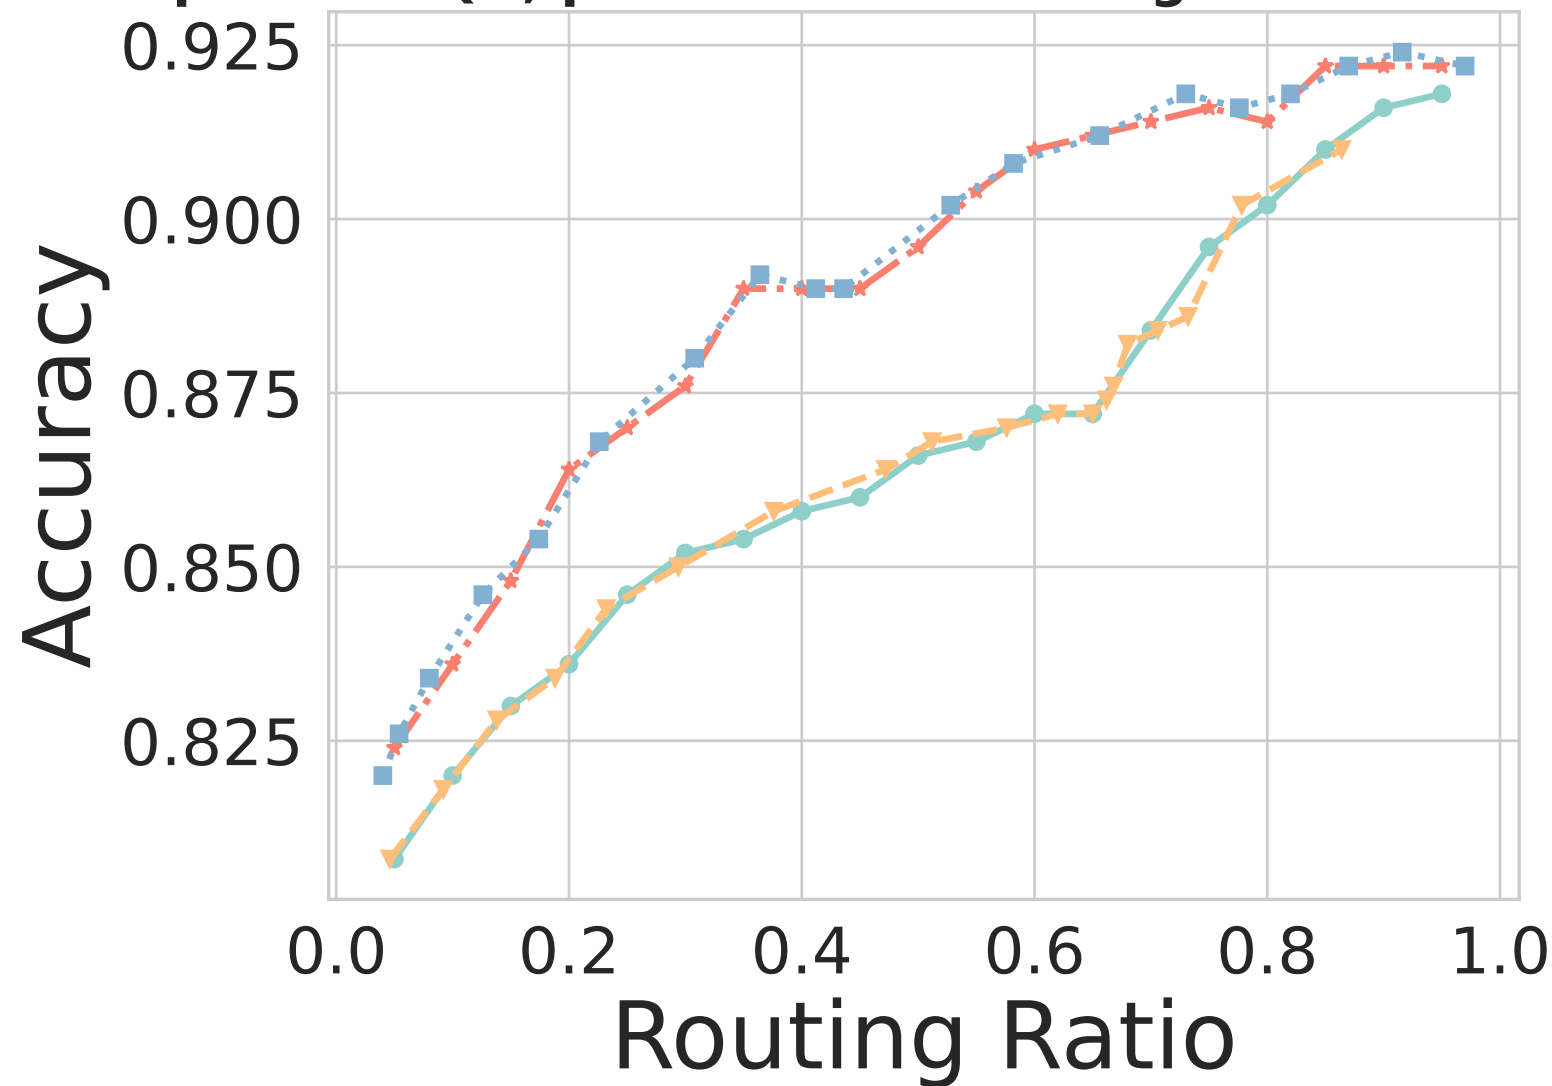

Supplement: supplementary_material [file cali_down_openbook_qa_phi-4-mini-reasoning_meta-llama_Llama-3.1-70B-Instruct.pdf › Routing_SLM_LLMs/Proxy_routing_prediction/to_meta-llama_Llama-3.1-70B-Instruct/openbook_qa_as_downstream/cali_down_openbook_qa_phi-4-mini-reasoning_meta-llama_Llama-3.1-70B-Instruct.pdf]

OpenBookQA, qwen-2.5-7b to Llama-3.1-70B

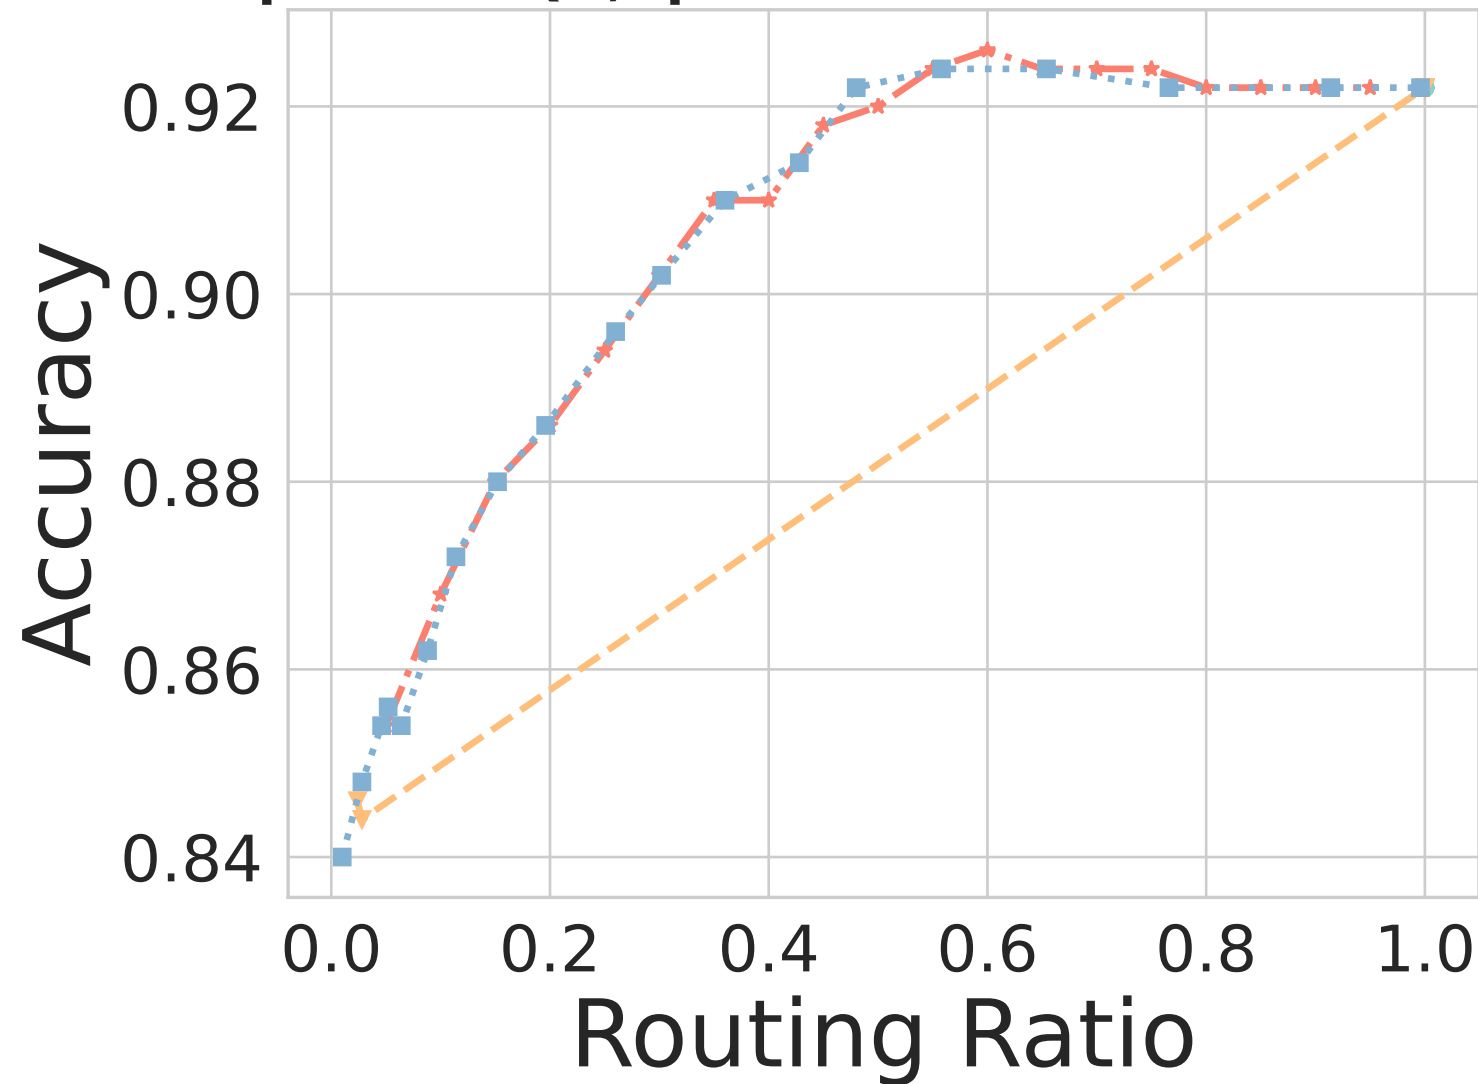

Supplement: supplementary_material [file cali_down_openbook_qa_qwen-2.5-7b_meta-llama_Llama-3.1-70B-Instruct.pdf › Routing_SLM_LLMs/Proxy_routing_prediction/to_meta-llama_Llama-3.1-70B-Instruct/openbook_qa_as_downstream/cali_down_openbook_qa_qwen-2.5-7b_meta-llama_Llama-3.1-70B-Instruct.pdf]

**OpenBookQA, rwkv to Llama-3.1-70B**

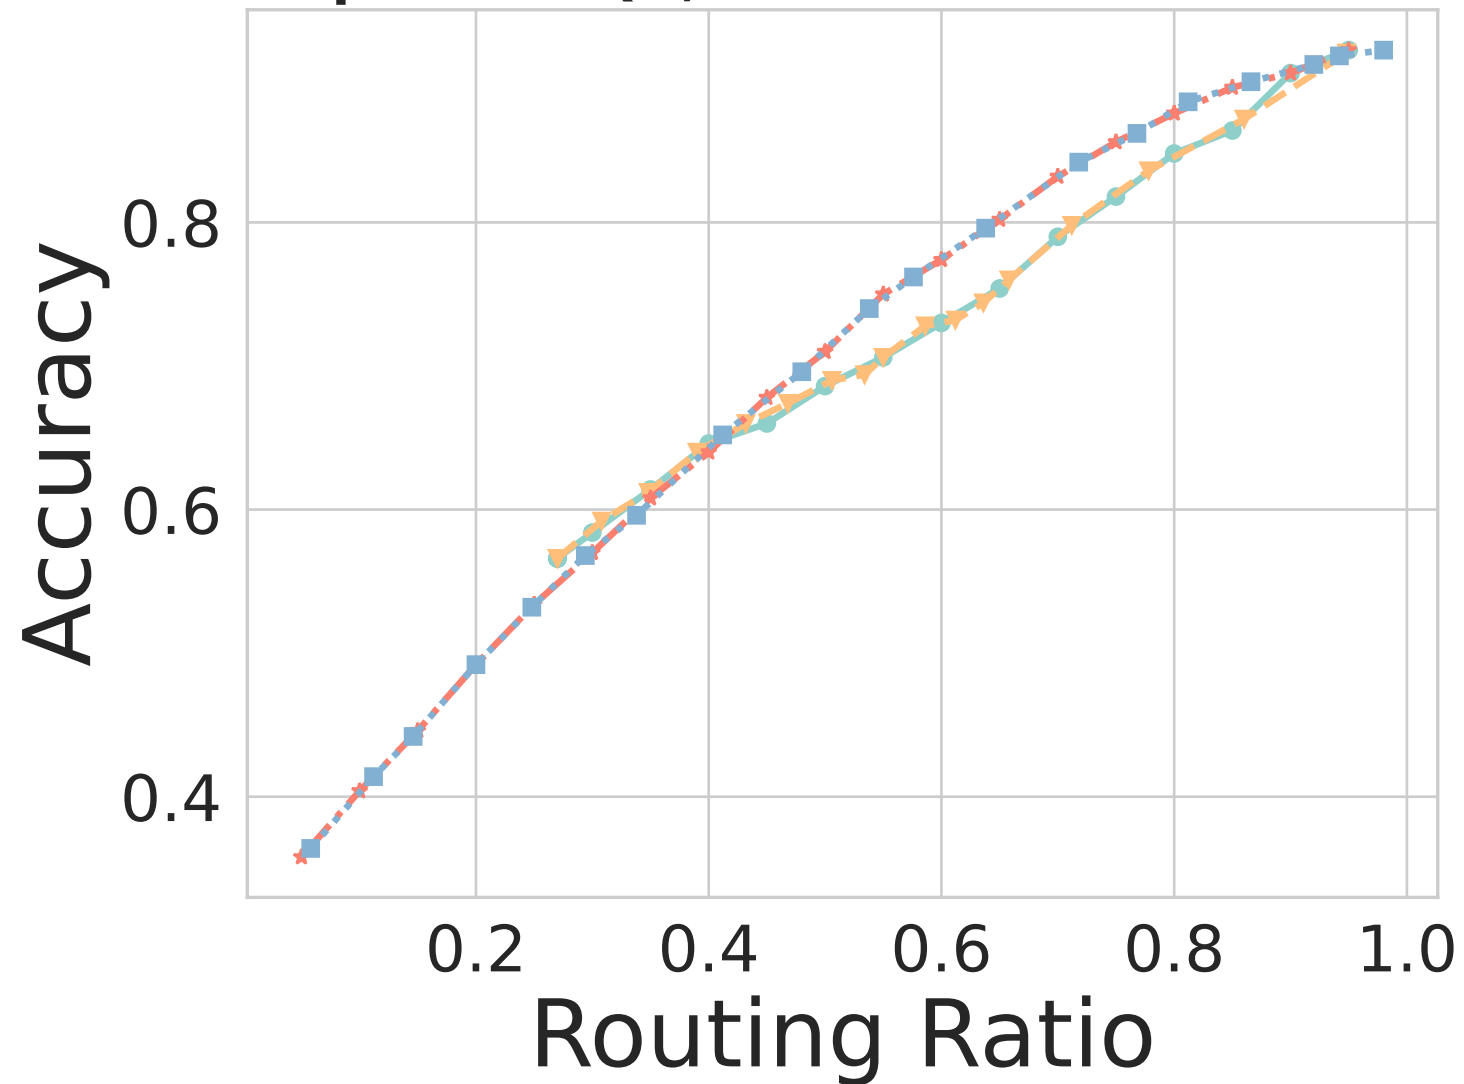

Supplement: supplementary_material [file cali_down_openbook_qa_rwkv_meta-llama_Llama-3.1-70B-Instruct.pdf › Routing_SLM_LLMs/Proxy_routing_prediction/to_meta-llama_Llama-3.1-70B-Instruct/openbook_qa_as_downstream/cali_down_openbook_qa_rwkv_meta-llama_Llama-3.1-70B-Instruct.pdf]

**PIQA, Qwen3-0.6B to Llama-3.1-70B**

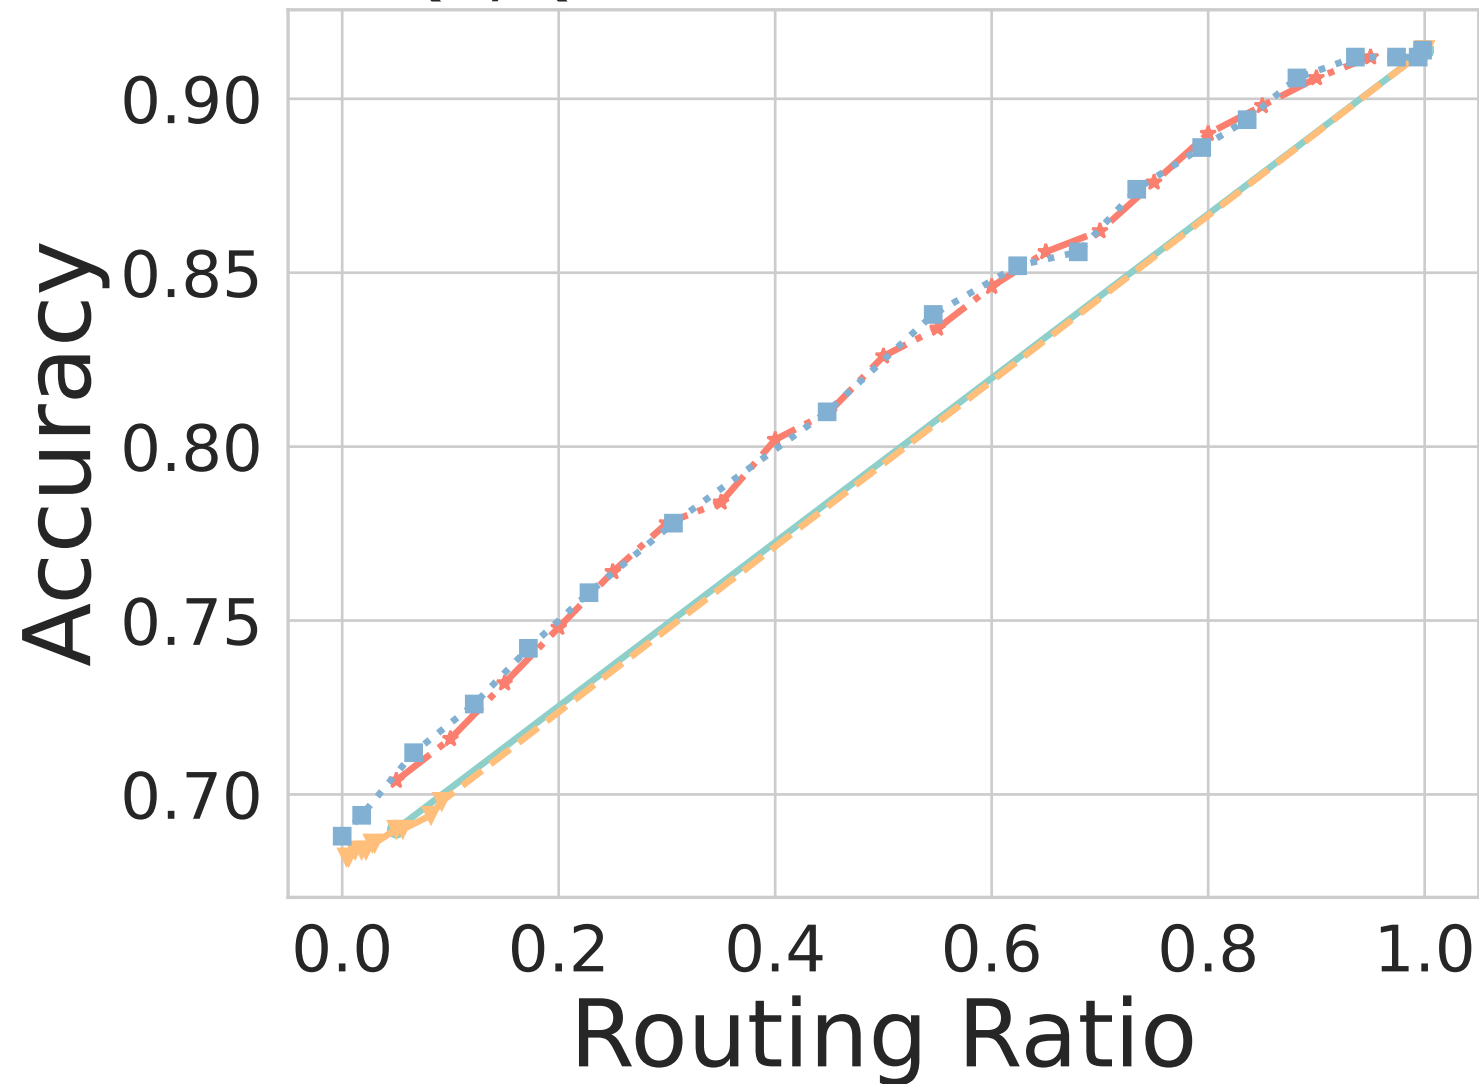

Supplement: supplementary_material [file cali_down_pi_qa_Qwen3-0.6B_meta-llama_Llama-3.1-70B-Instruct.pdf › Routing_SLM_LLMs/Proxy_routing_prediction/to_meta-llama_Llama-3.1-70B-Instruct/pi_qa_as_downstream/cali_down_pi_qa_Qwen3-0.6B_meta-llama_Llama-3.1-70B-Instruct.pdf]

**PIQA, Qwen3-1.7B to Llama-3.1-70B**

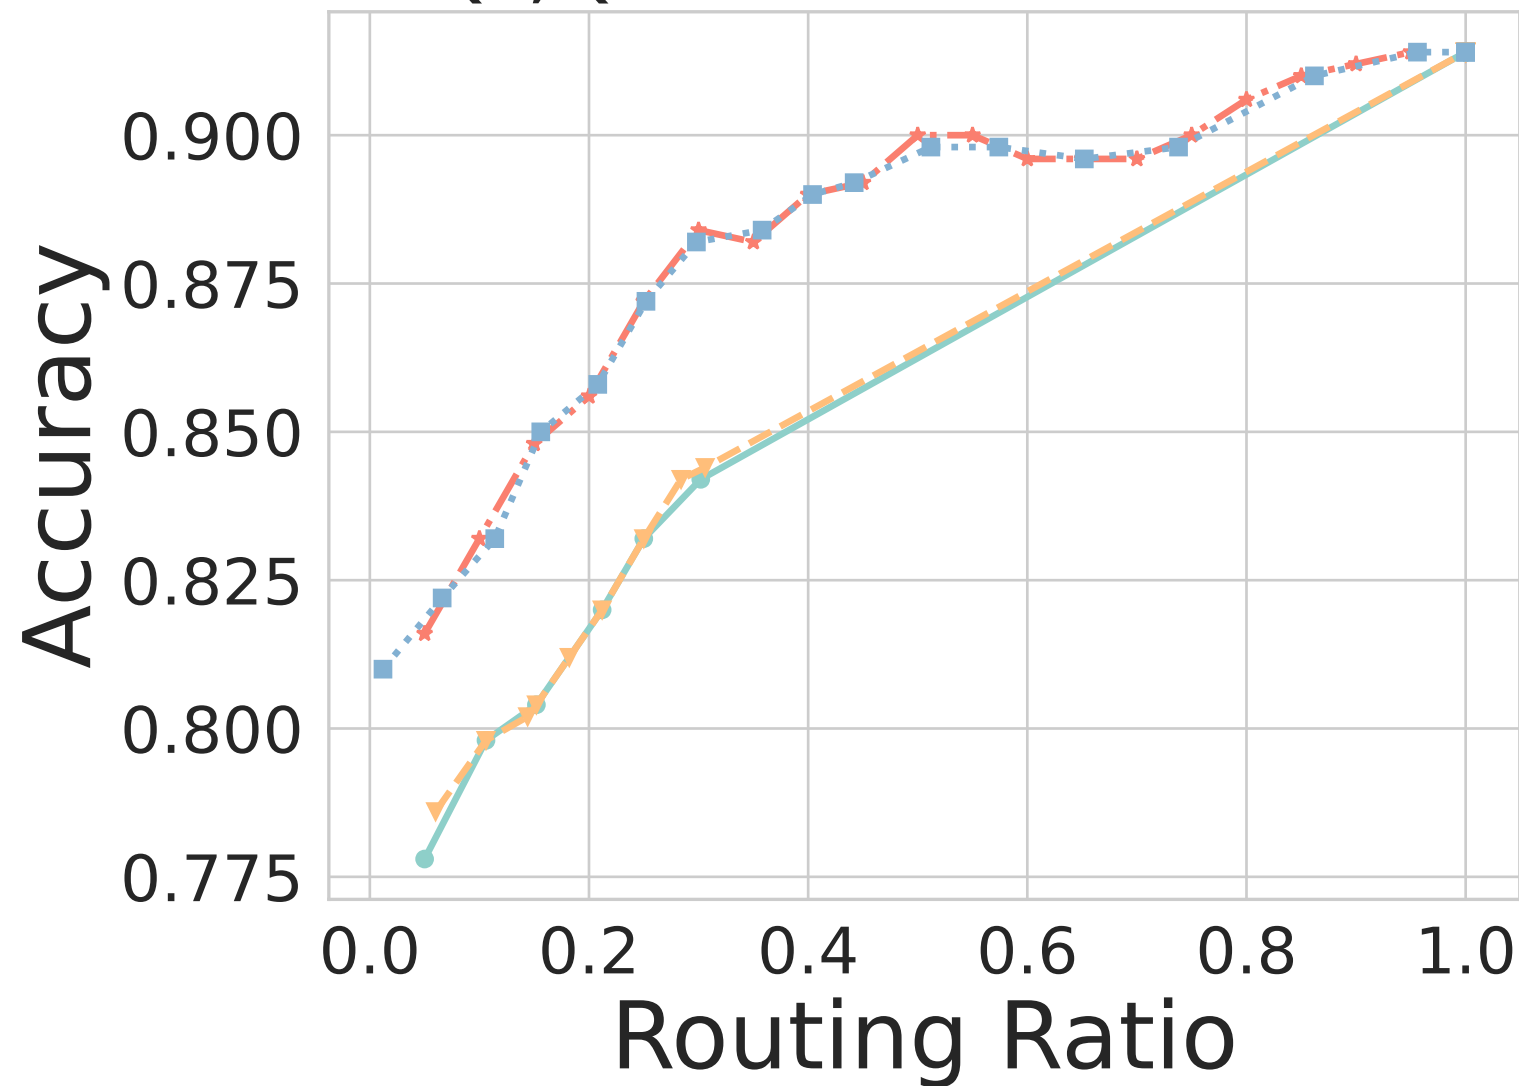

Supplement: supplementary_material [file cali_down_pi_qa_Qwen3-1.7B_meta-llama_Llama-3.1-70B-Instruct.pdf › Routing_SLM_LLMs/Proxy_routing_prediction/to_meta-llama_Llama-3.1-70B-Instruct/pi_qa_as_downstream/cali_down_pi_qa_Qwen3-1.7B_meta-llama_Llama-3.1-70B-Instruct.pdf]

**PIQA, Qwen3-4B to Llama-3.1-70B**

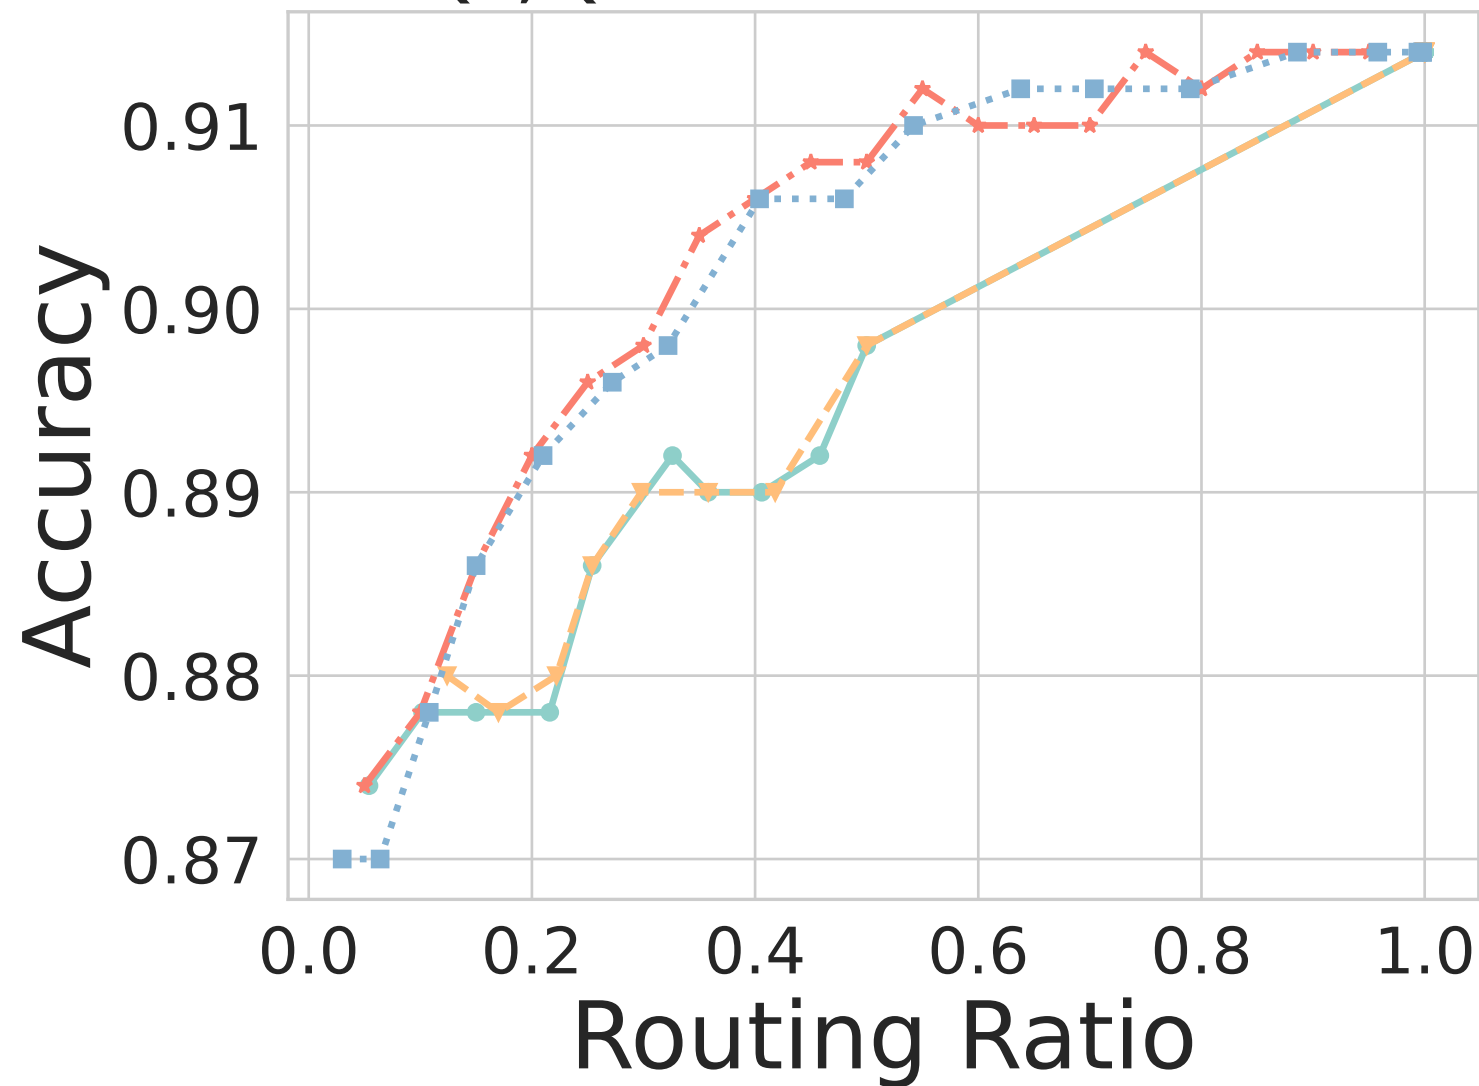

Supplement: supplementary_material [file cali_down_pi_qa_Qwen3-4B_meta-llama_Llama-3.1-70B-Instruct.pdf › Routing_SLM_LLMs/Proxy_routing_prediction/to_meta-llama_Llama-3.1-70B-Instruct/pi_qa_as_downstream/cali_down_pi_qa_Qwen3-4B_meta-llama_Llama-3.1-70B-Instruct.pdf]

**PIQA, granite-3.1-8b to Llama-3.1-70B**

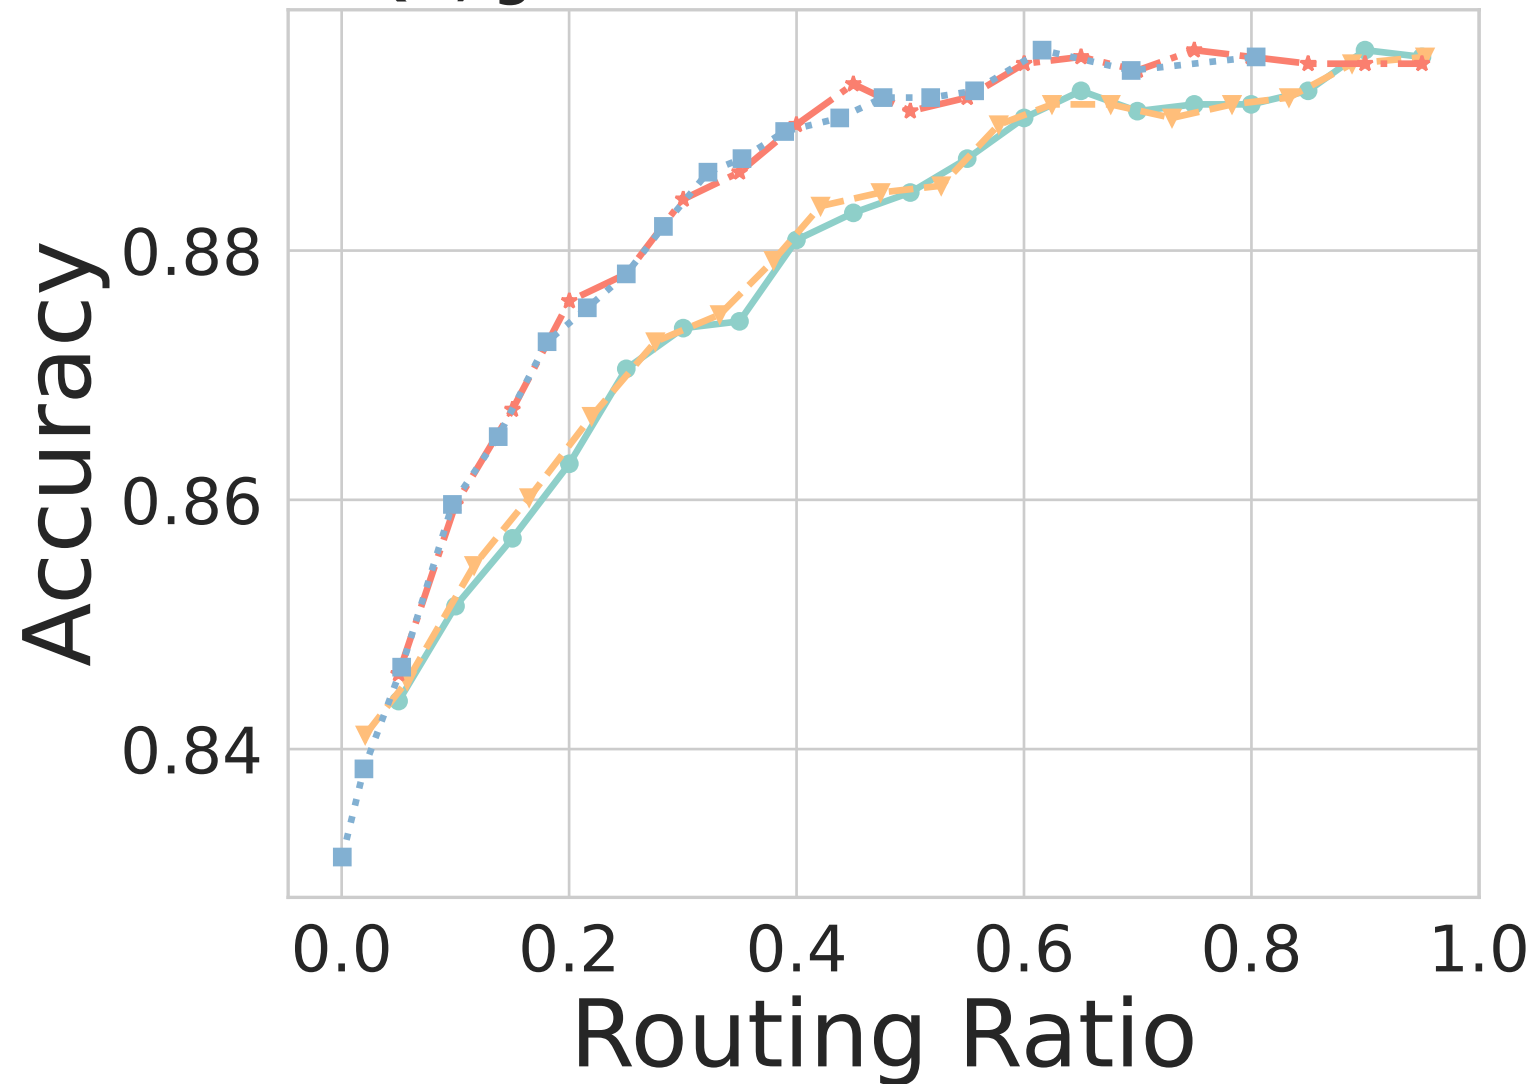

Supplement: supplementary_material [file cali_down_pi_qa_granite-3.1-8b_meta-llama_Llama-3.1-70B-Instruct.pdf › Routing_SLM_LLMs/Proxy_routing_prediction/to_meta-llama_Llama-3.1-70B-Instruct/pi_qa_as_downstream/cali_down_pi_qa_granite-3.1-8b_meta-llama_Llama-3.1-70B-Instruct.pdf]

**PIQA, llama-3.1-8b to Llama-3.1-70B**

Accuracy

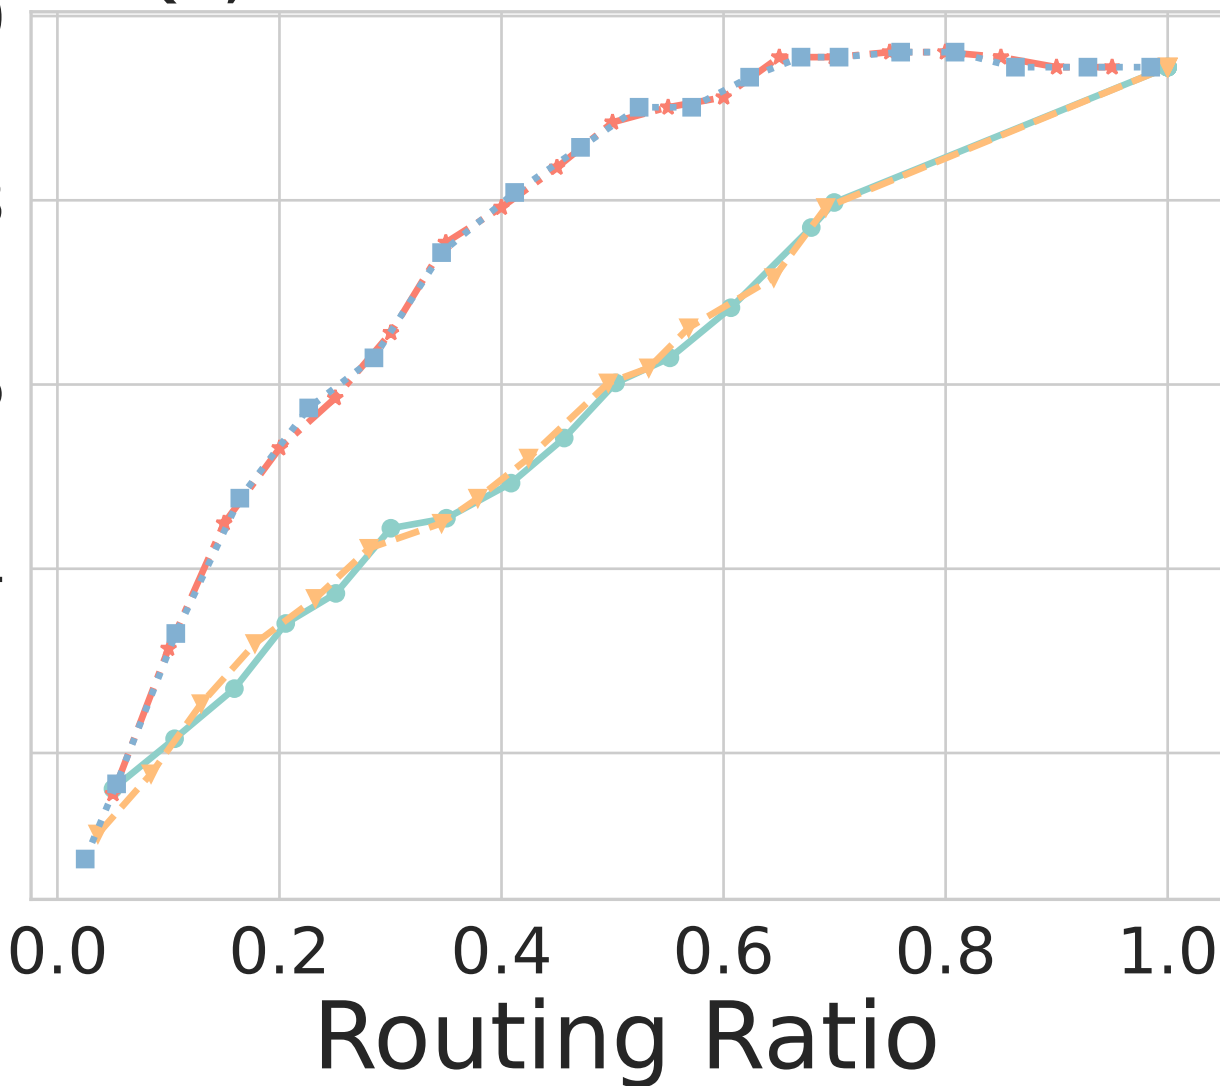

Supplement: supplementary_material [file cali_down_pi_qa_llama-3.1-8b_meta-llama_Llama-3.1-70B-Instruct.pdf › Routing_SLM_LLMs/Proxy_routing_prediction/to_meta-llama_Llama-3.1-70B-Instruct/pi_qa_as_downstream/cali_down_pi_qa_llama-3.1-8b_meta-llama_Llama-3.1-70B-Instruct.pdf]

**PIQA, llama-3.2-1b to Llama-3.1-70B**

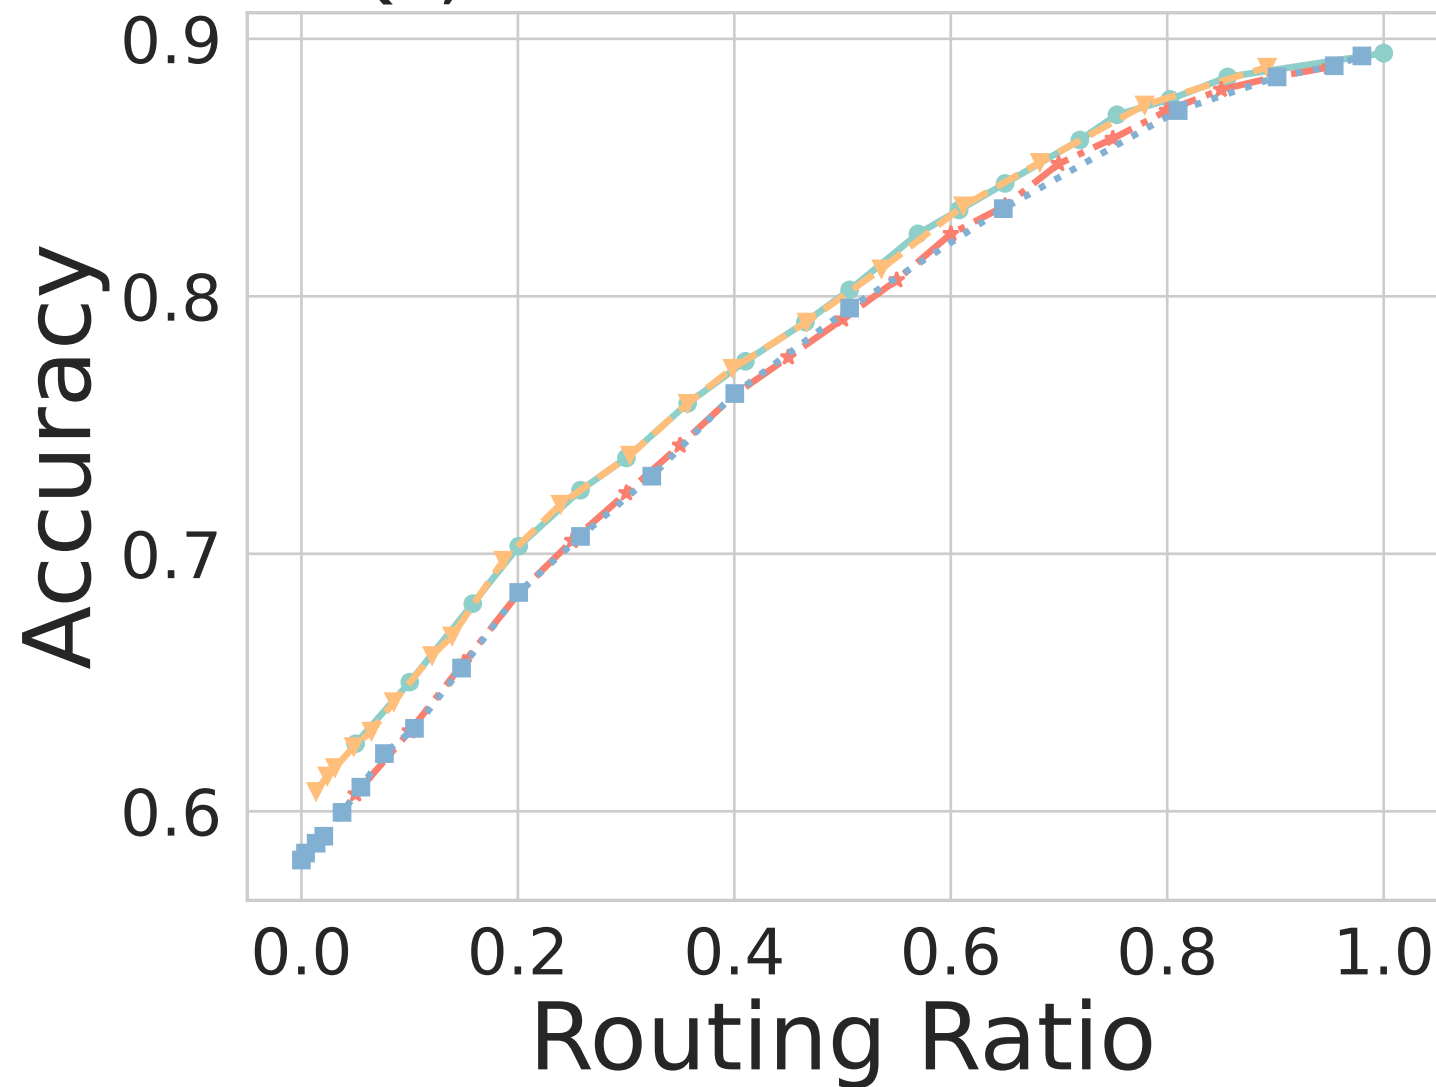

Supplement: supplementary_material [file cali_down_pi_qa_llama-3.2-1b_meta-llama_Llama-3.1-70B-Instruct.pdf › Routing_SLM_LLMs/Proxy_routing_prediction/to_meta-llama_Llama-3.1-70B-Instruct/pi_qa_as_downstream/cali_down_pi_qa_llama-3.2-1b_meta-llama_Llama-3.1-70B-Instruct.pdf]

**PIQA, llama-3.2-3b to Llama-3.1-70B**

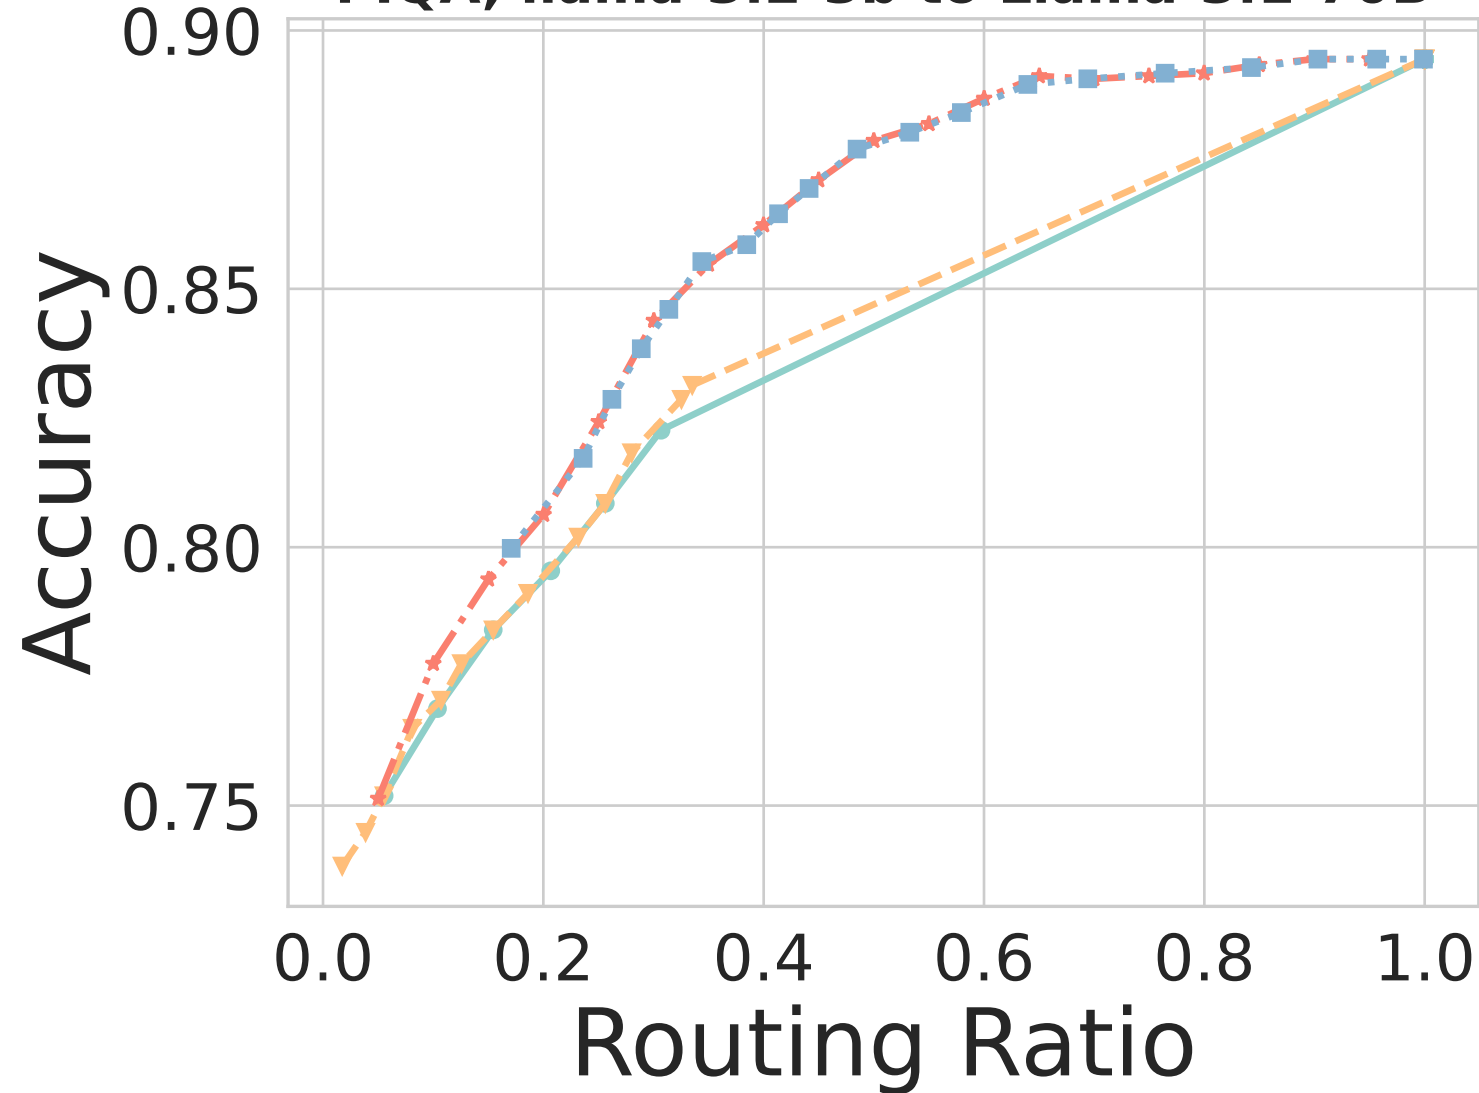

Supplement: supplementary_material [file cali_down_pi_qa_llama-3.2-3b_meta-llama_Llama-3.1-70B-Instruct.pdf › Routing_SLM_LLMs/Proxy_routing_prediction/to_meta-llama_Llama-3.1-70B-Instruct/pi_qa_as_downstream/cali_down_pi_qa_llama-3.2-3b_meta-llama_Llama-3.1-70B-Instruct.pdf]

**PIQA, mistral-7b to Llama-3.1-70B**

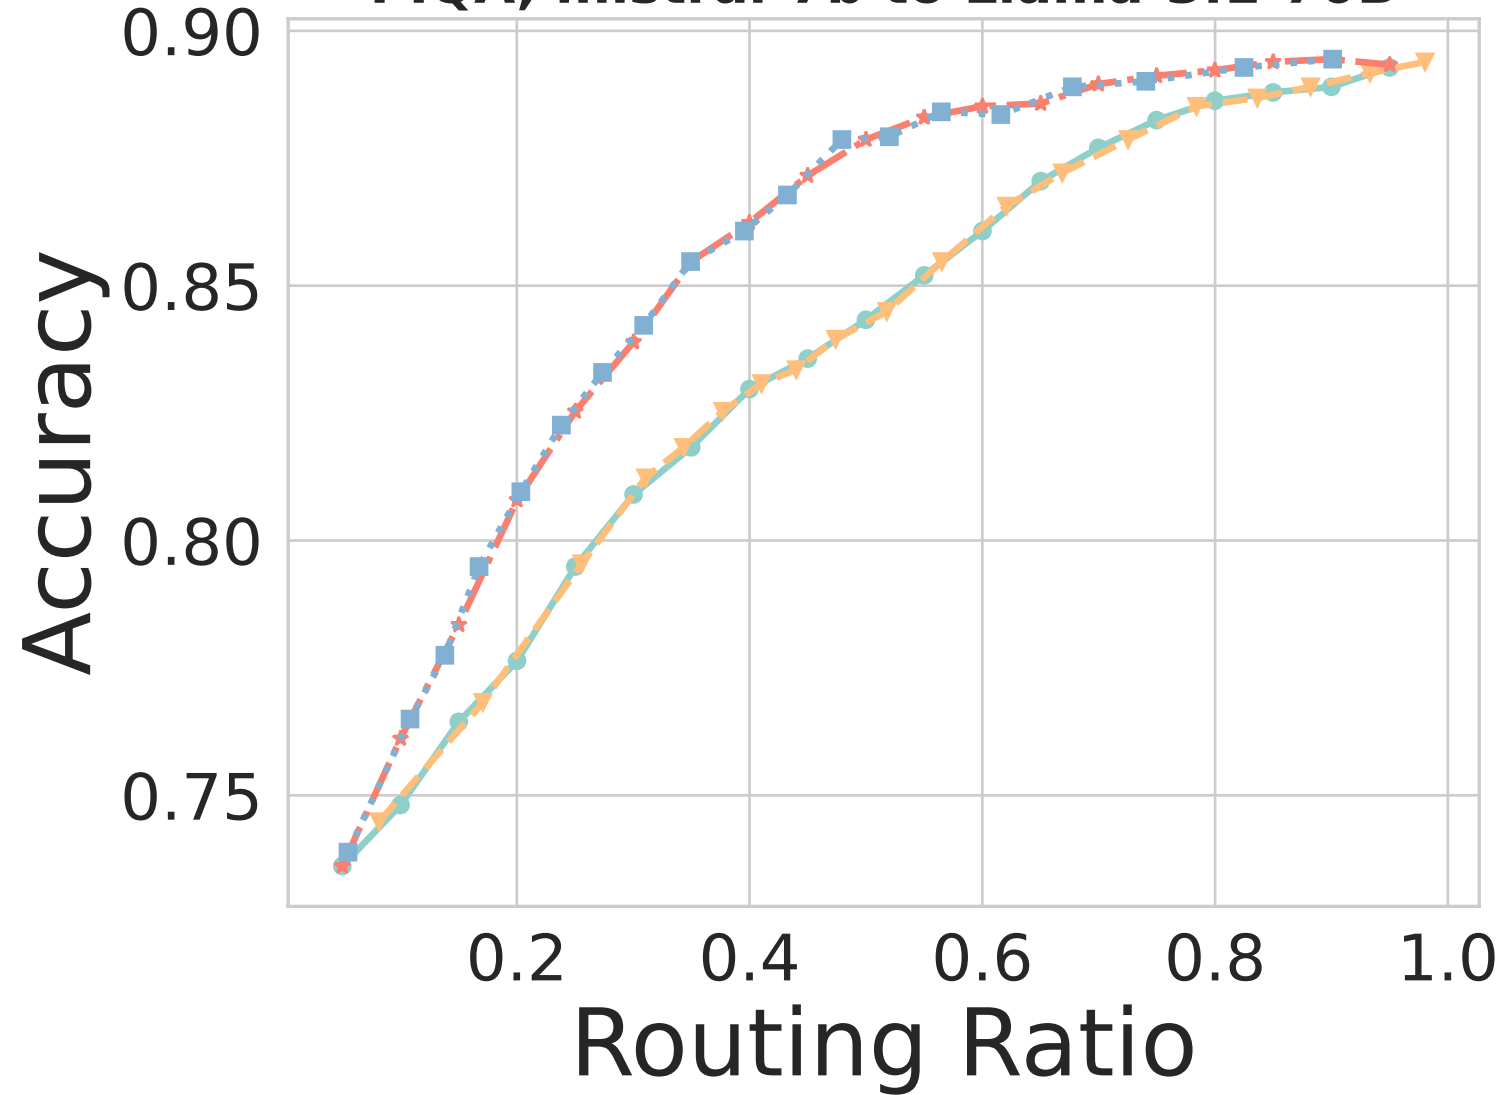

Supplement: supplementary_material [file cali_down_pi_qa_mistral-7b_meta-llama_Llama-3.1-70B-Instruct.pdf › Routing_SLM_LLMs/Proxy_routing_prediction/to_meta-llama_Llama-3.1-70B-Instruct/pi_qa_as_downstream/cali_down_pi_qa_mistral-7b_meta-llama_Llama-3.1-70B-Instruct.pdf]

**PIQA, phi-3.5-mini to Llama-3.1-70B**

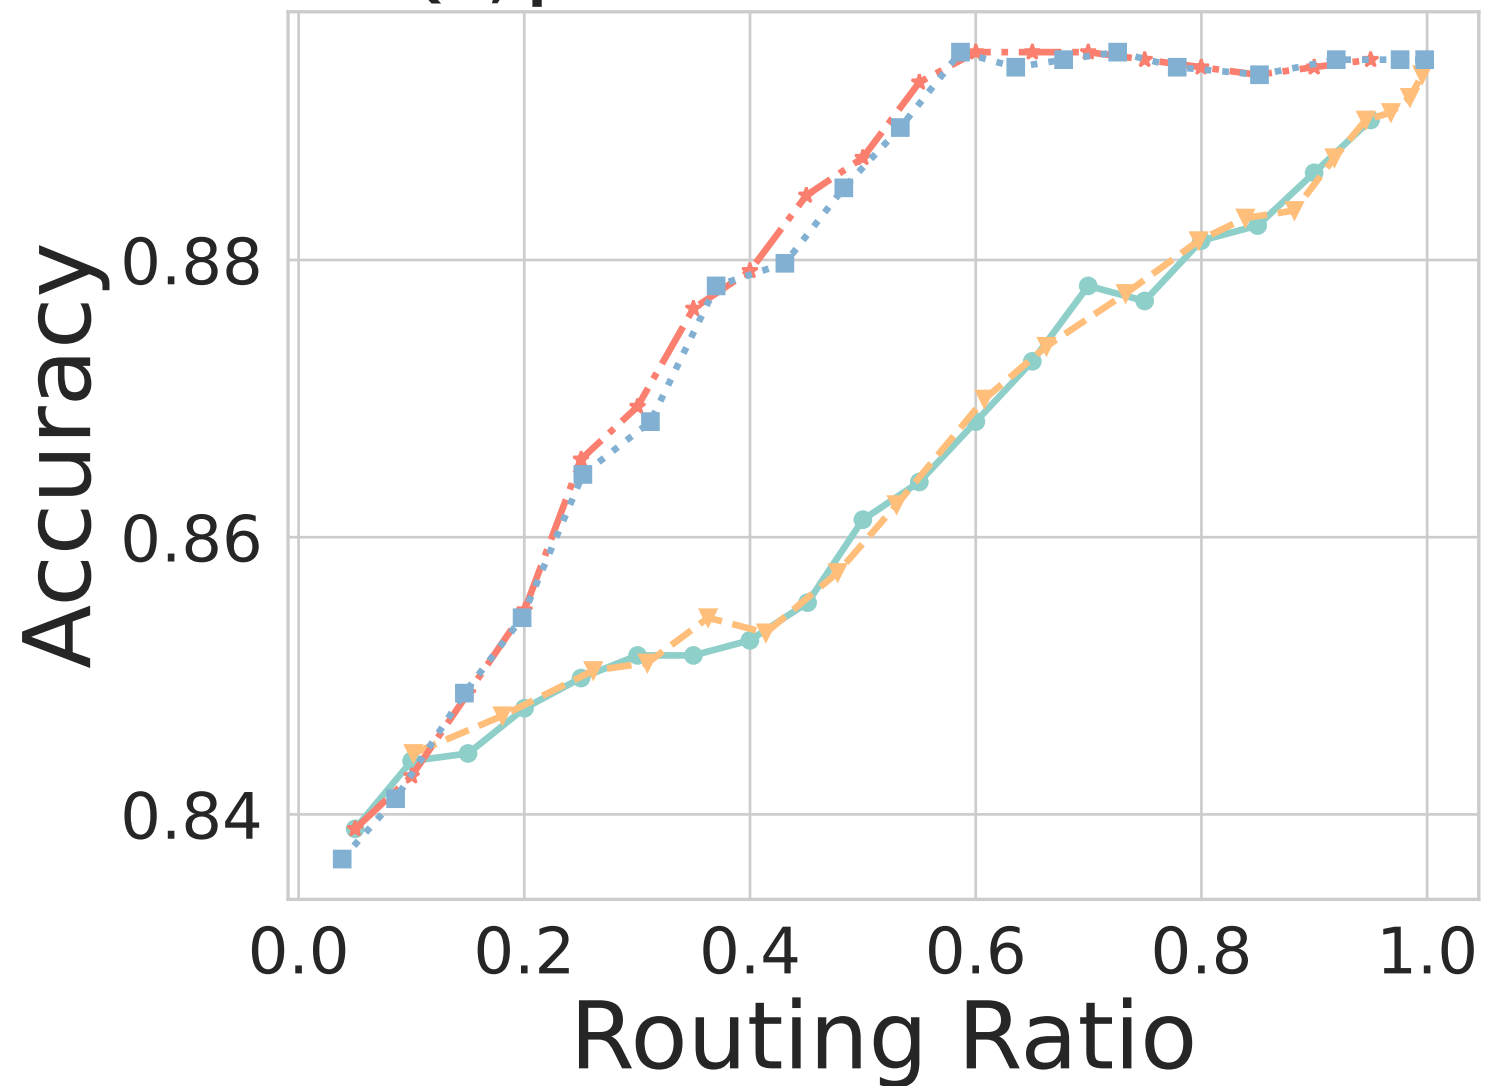

Supplement: supplementary_material [file cali_down_pi_qa_phi-3.5-mini_meta-llama_Llama-3.1-70B-Instruct.pdf › Routing_SLM_LLMs/Proxy_routing_prediction/to_meta-llama_Llama-3.1-70B-Instruct/pi_qa_as_downstream/cali_down_pi_qa_phi-3.5-mini_meta-llama_Llama-3.1-70B-Instruct.pdf]

**PIQA, phi-4-mini-reasoning to Llama-3.1-70B**

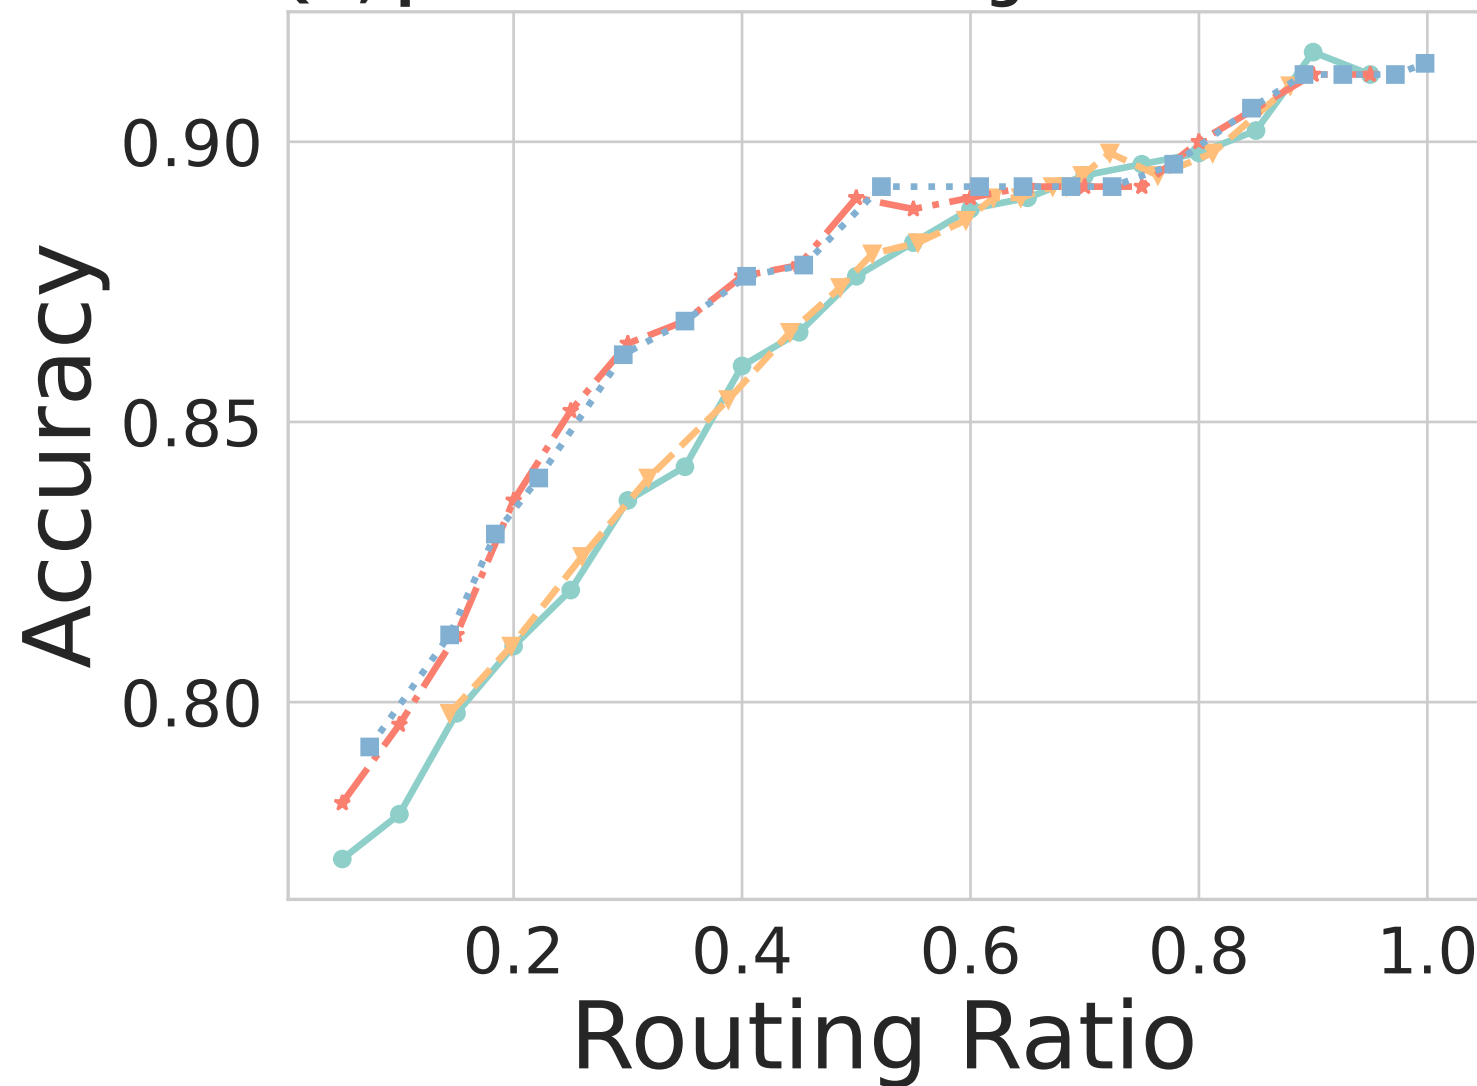

Supplement: supplementary_material [file cali_down_pi_qa_phi-4-mini-reasoning_meta-llama_Llama-3.1-70B-Instruct.pdf › Routing_SLM_LLMs/Proxy_routing_prediction/to_meta-llama_Llama-3.1-70B-Instruct/pi_qa_as_downstream/cali_down_pi_qa_phi-4-mini-reasoning_meta-llama_Llama-3.1-70B-Instruct.pdf]

PIQA, qwen-2.5-7b to Llama-3.1-70B

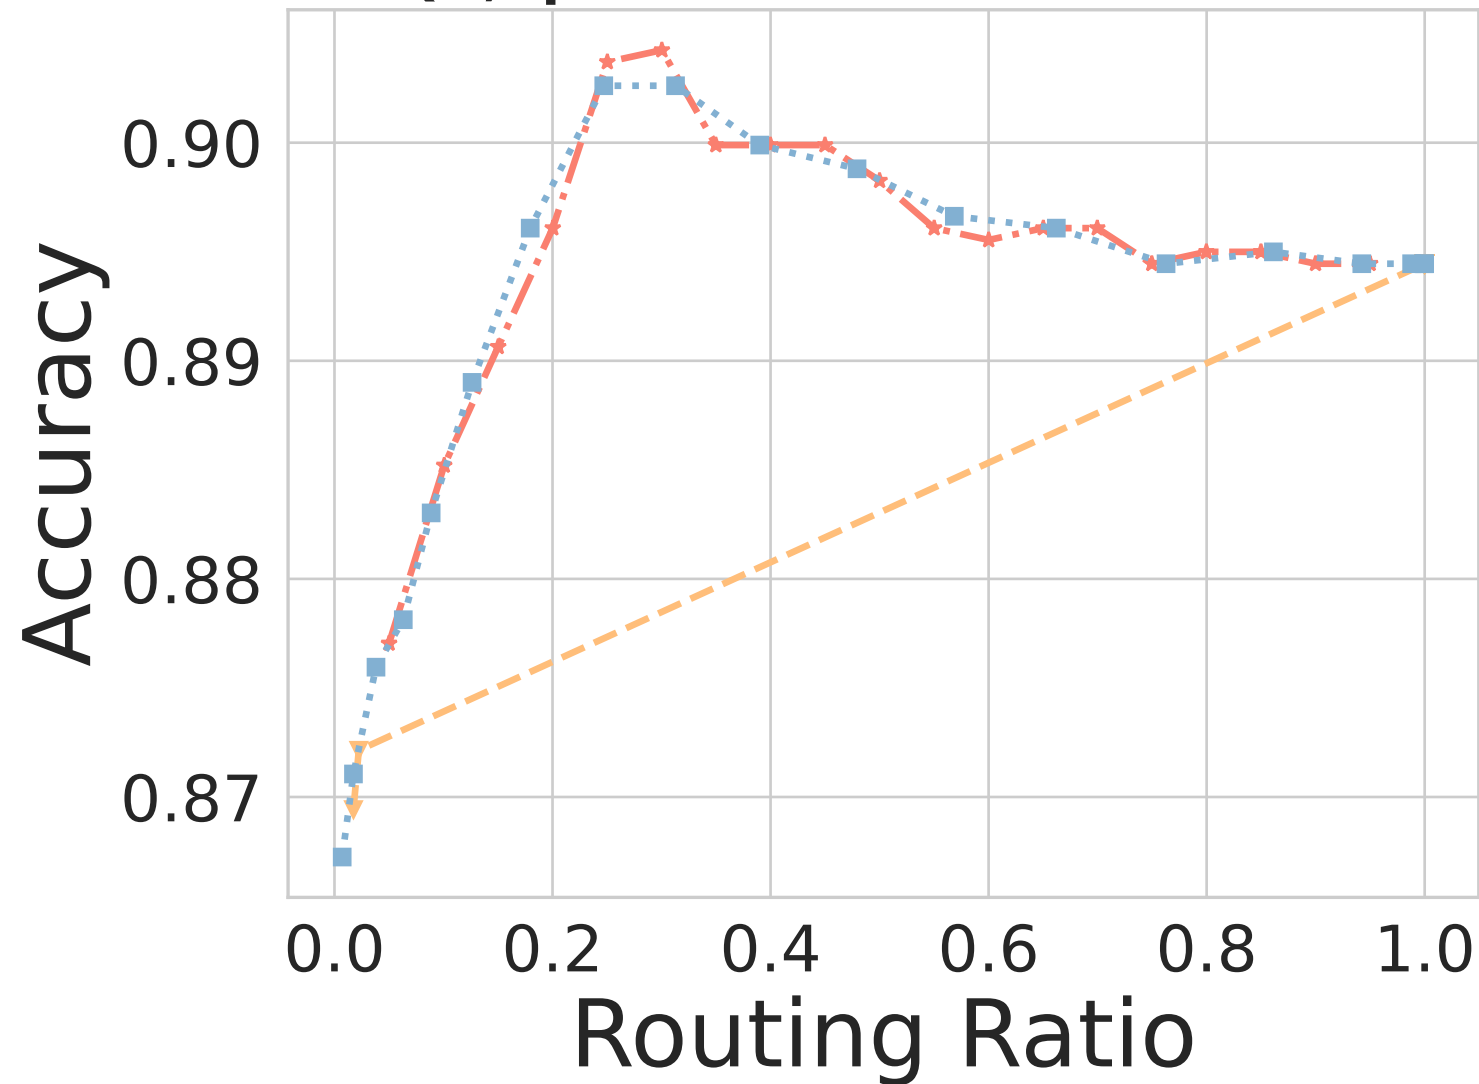

Supplement: supplementary_material [file cali_down_pi_qa_qwen-2.5-7b_meta-llama_Llama-3.1-70B-Instruct.pdf › Routing_SLM_LLMs/Proxy_routing_prediction/to_meta-llama_Llama-3.1-70B-Instruct/pi_qa_as_downstream/cali_down_pi_qa_qwen-2.5-7b_meta-llama_Llama-3.1-70B-Instruct.pdf]

**PIQA, rwkv to Llama-3.1-70B**

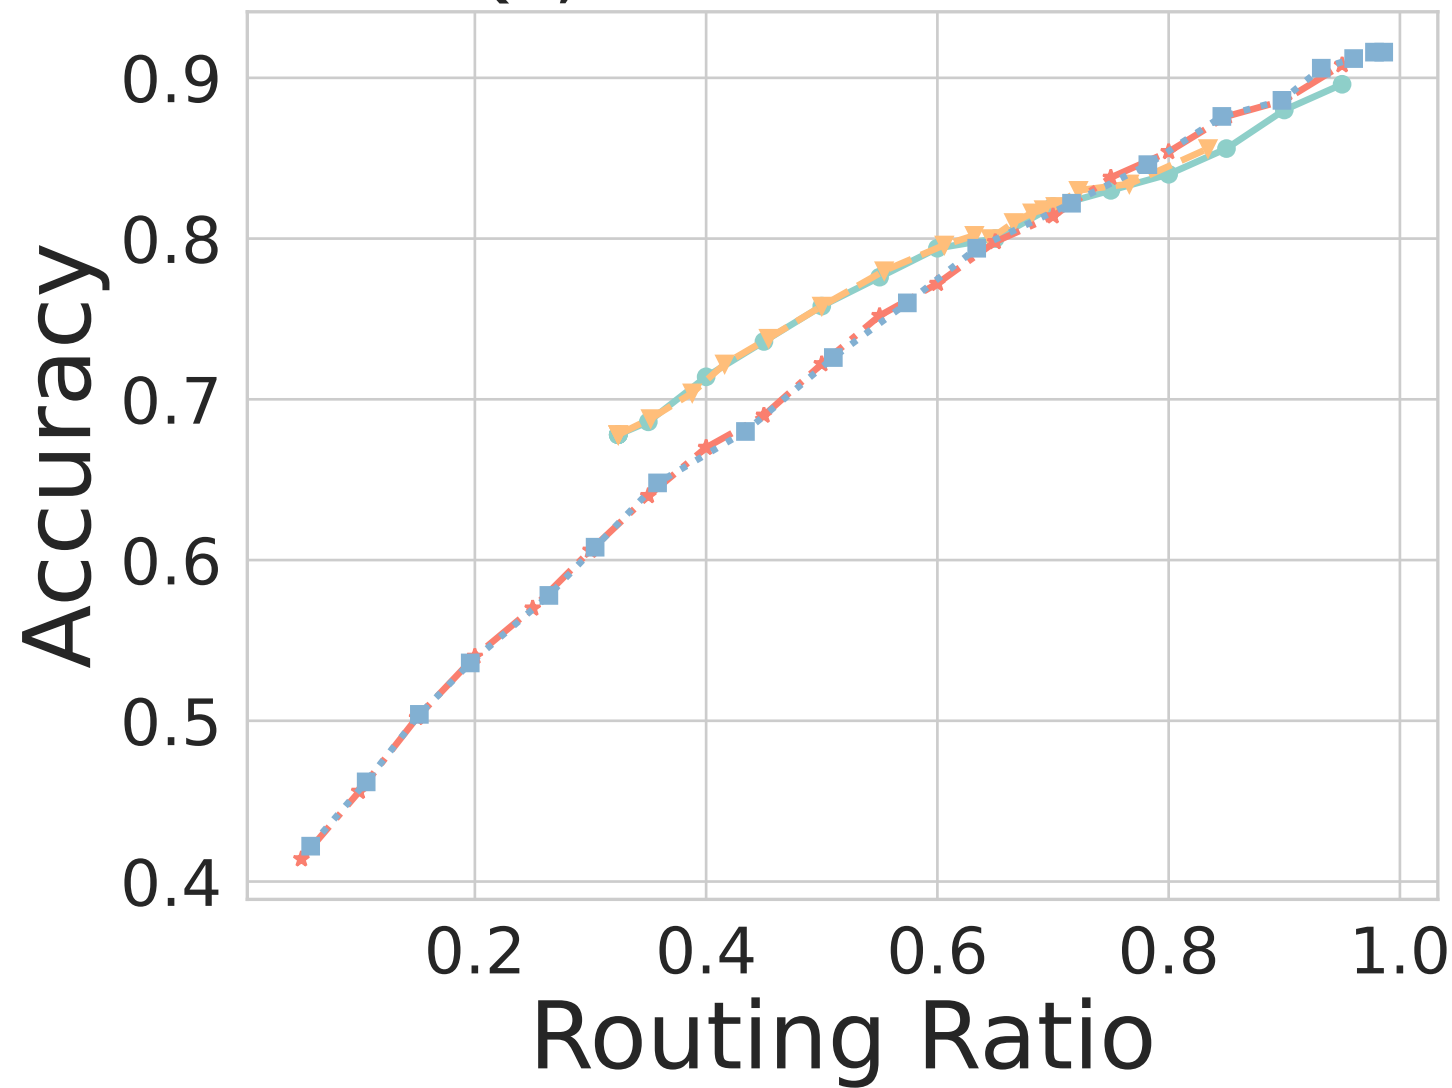

Supplement: supplementary_material [file cali_down_pi_qa_rwkv_meta-llama_Llama-3.1-70B-Instruct.pdf › Routing_SLM_LLMs/Proxy_routing_prediction/to_meta-llama_Llama-3.1-70B-Instruct/pi_qa_as_downstream/cali_down_pi_qa_rwkv_meta-llama_Llama-3.1-70B-Instruct.pdf]

**Social IQa, Qwen3-0.6B to Llama-3.1-70B**

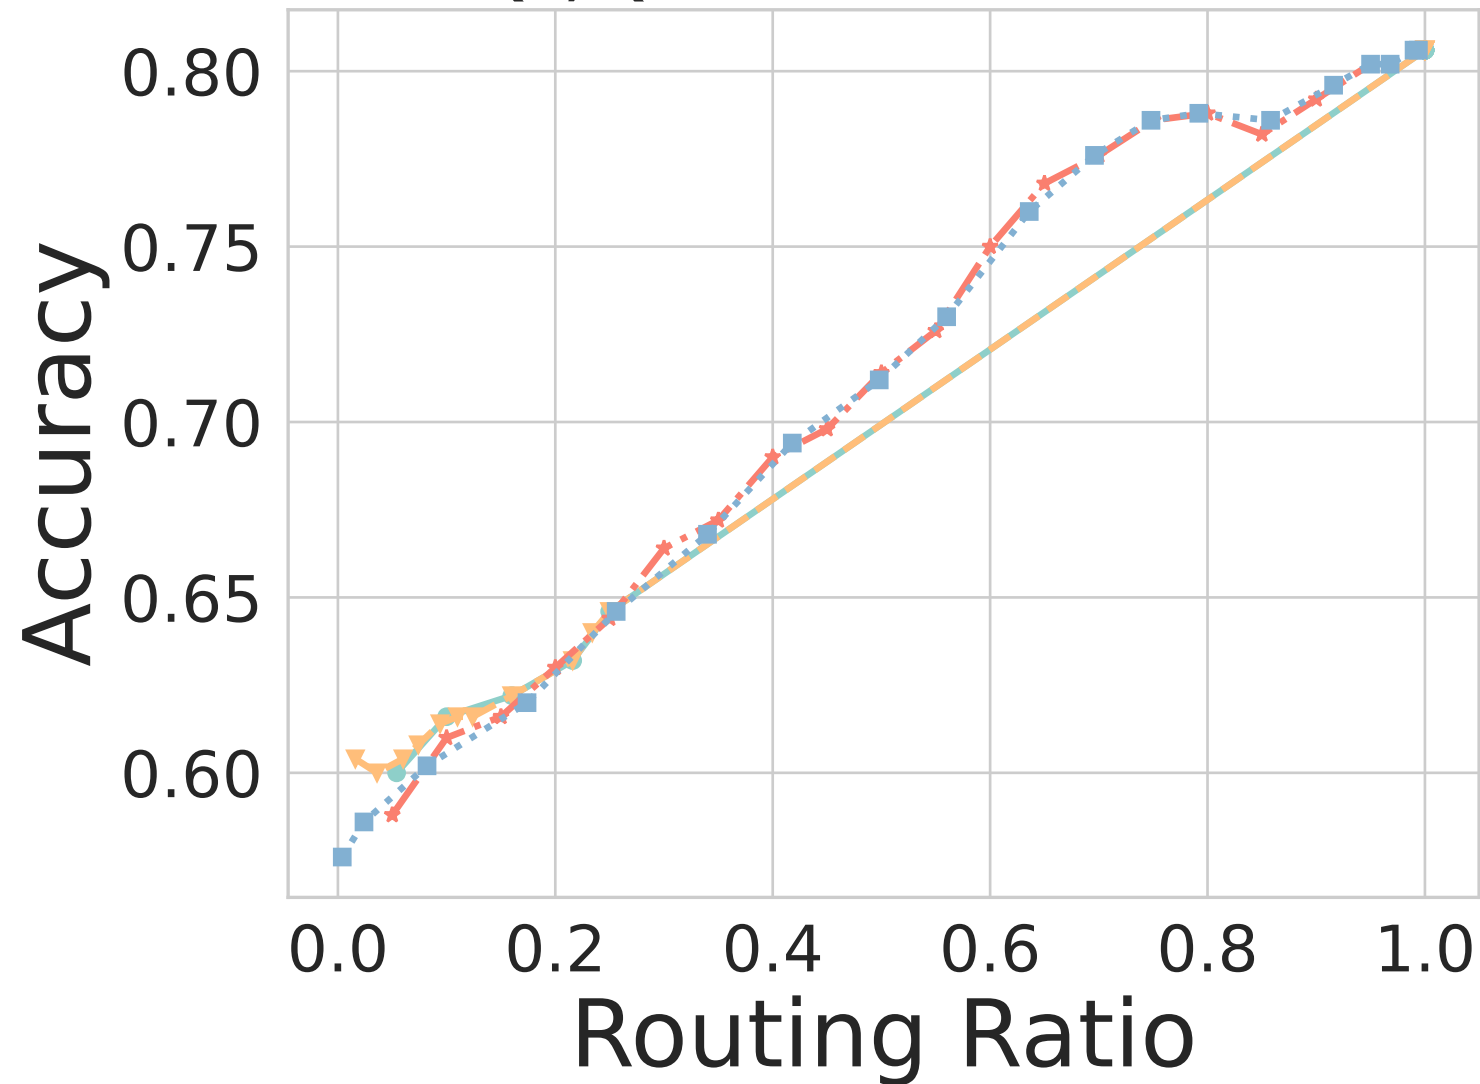

Supplement: supplementary_material [file cali_down_social_i_qa_Qwen3-0.6B_meta-llama_Llama-3.1-70B-Instruct.pdf › Routing_SLM_LLMs/Proxy_routing_prediction/to_meta-llama_Llama-3.1-70B-Instruct/social_i_qa_as_downstream/cali_down_social_i_qa_Qwen3-0.6B_meta-llama_Llama-3.1-70B-Instruct.pdf]

**Social IQa, Qwen3-1.7B to Llama-3.1-70B**

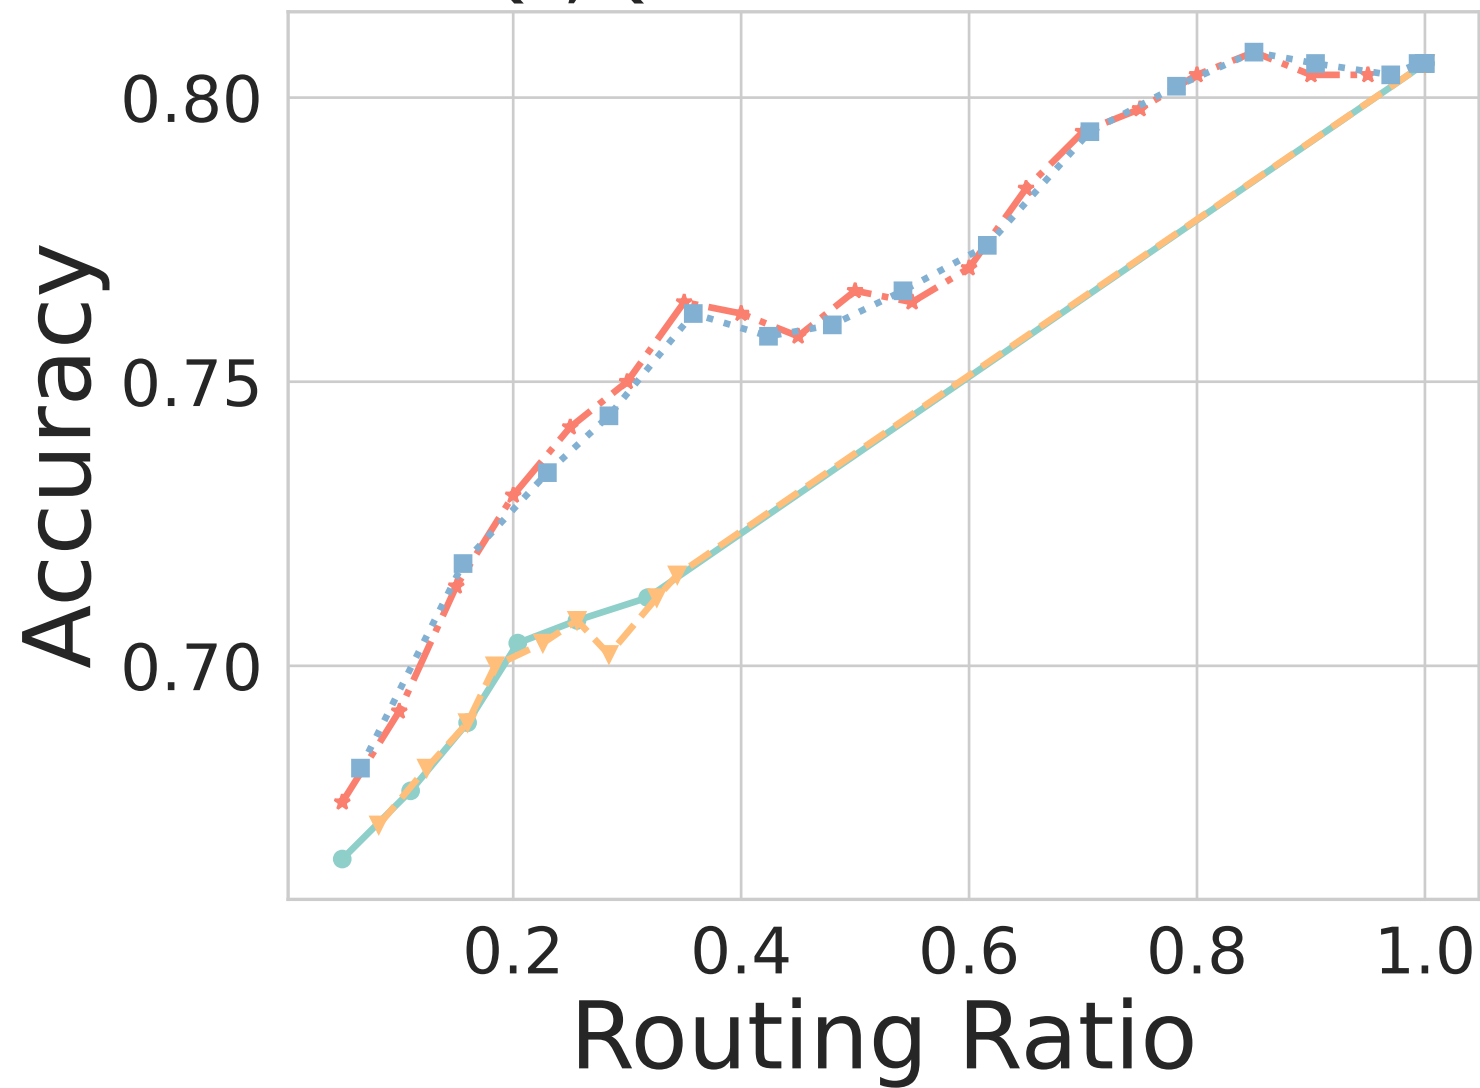

Supplement: supplementary_material [file cali_down_social_i_qa_Qwen3-1.7B_meta-llama_Llama-3.1-70B-Instruct.pdf › Routing_SLM_LLMs/Proxy_routing_prediction/to_meta-llama_Llama-3.1-70B-Instruct/social_i_qa_as_downstream/cali_down_social_i_qa_Qwen3-1.7B_meta-llama_Llama-3.1-70B-Instruct.pdf]

**Social IQa, Qwen3-4B to Llama-3.1-70B**

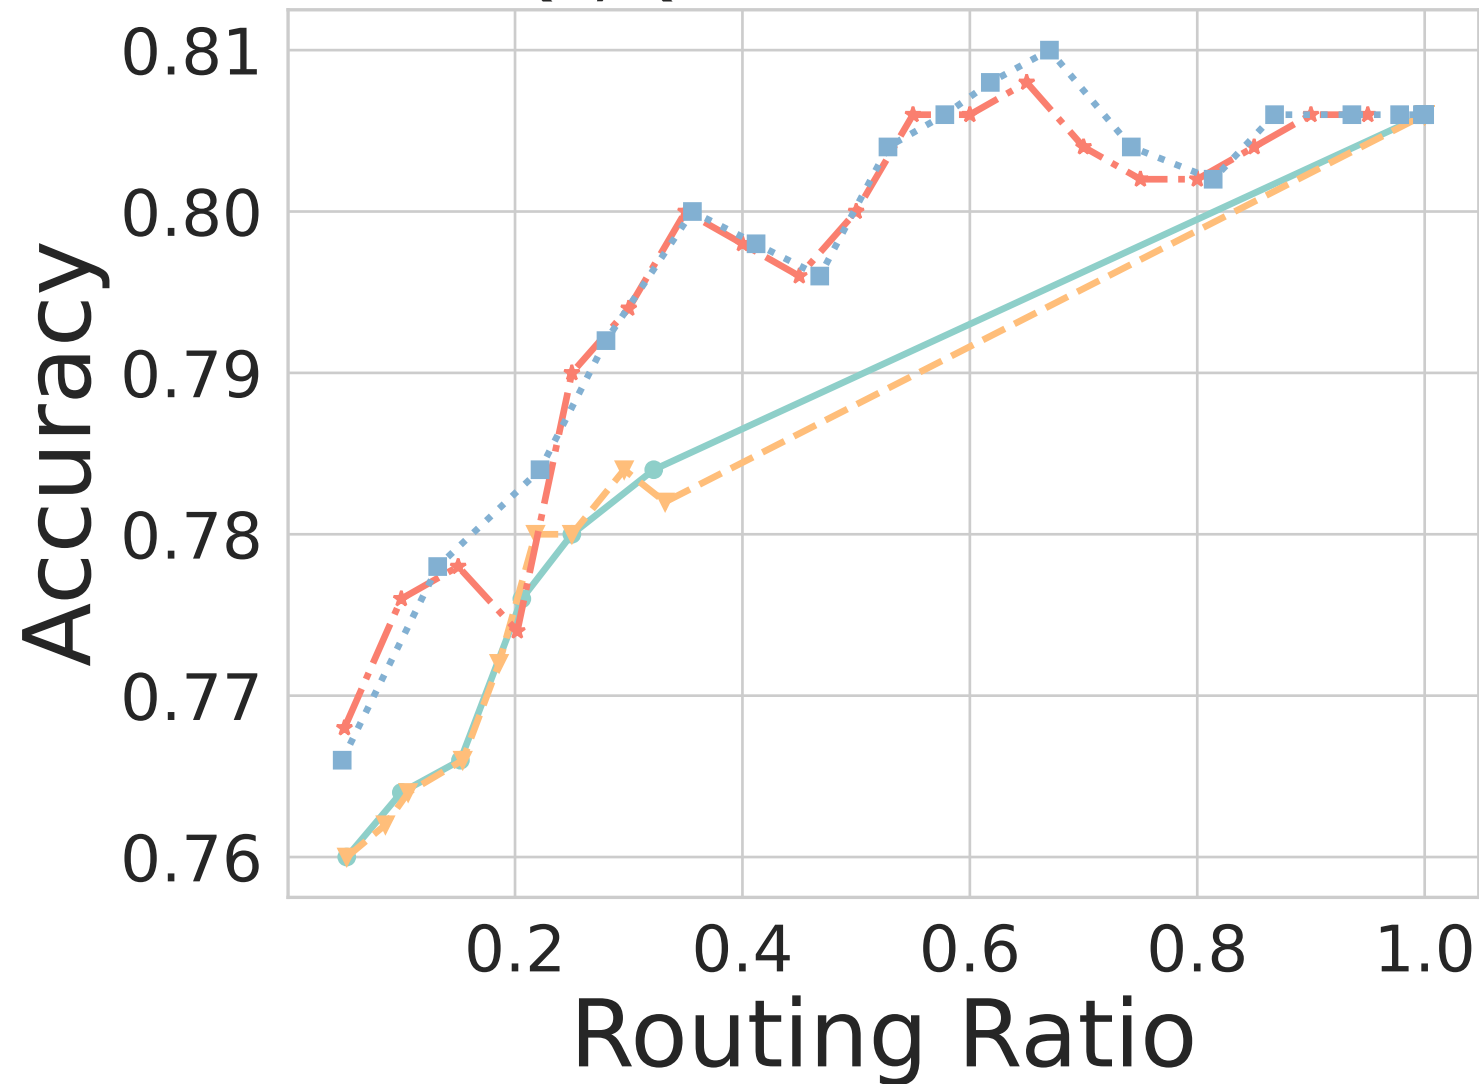

Supplement: supplementary_material [file cali_down_social_i_qa_Qwen3-4B_meta-llama_Llama-3.1-70B-Instruct.pdf › Routing_SLM_LLMs/Proxy_routing_prediction/to_meta-llama_Llama-3.1-70B-Instruct/social_i_qa_as_downstream/cali_down_social_i_qa_Qwen3-4B_meta-llama_Llama-3.1-70B-Instruct.pdf]

**Social IQa, granite-3.1-8b to Llama-3.1-70B**

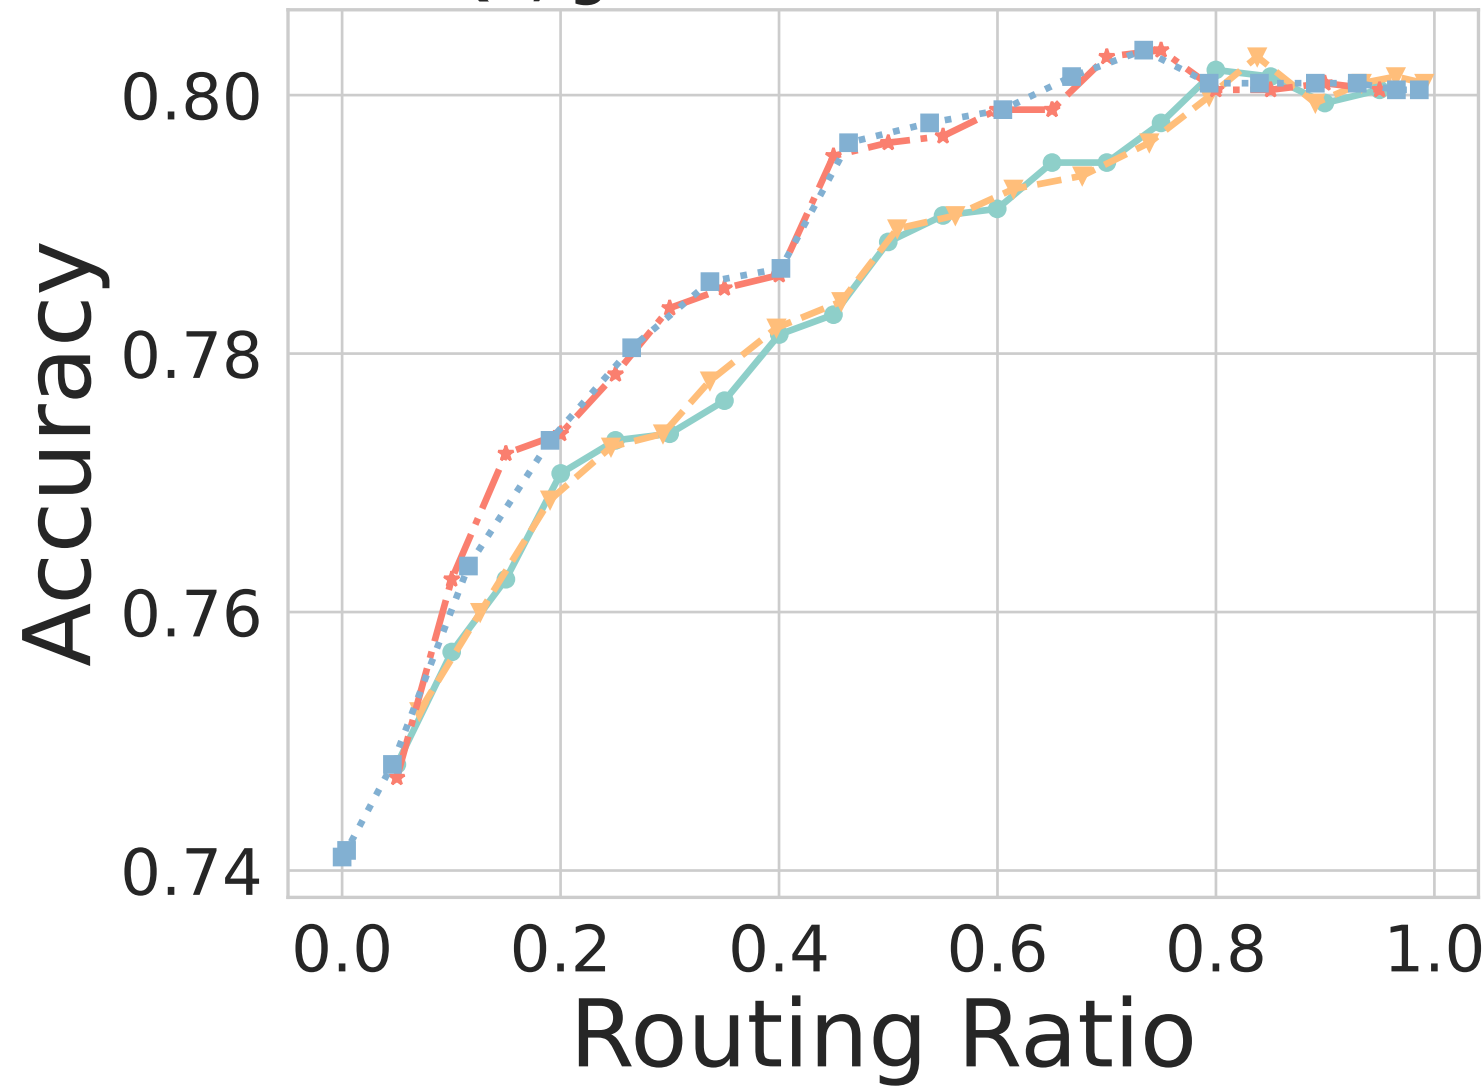

Supplement: supplementary_material [file cali_down_social_i_qa_granite-3.1-8b_meta-llama_Llama-3.1-70B-Instruct.pdf › Routing_SLM_LLMs/Proxy_routing_prediction/to_meta-llama_Llama-3.1-70B-Instruct/social_i_qa_as_downstream/cali_down_social_i_qa_granite-3.1-8b_meta-llama_Llama-3.1-70B-Instruct.pdf]

**Social IQa, llama-3.1-8b to Llama-3.1-70B**

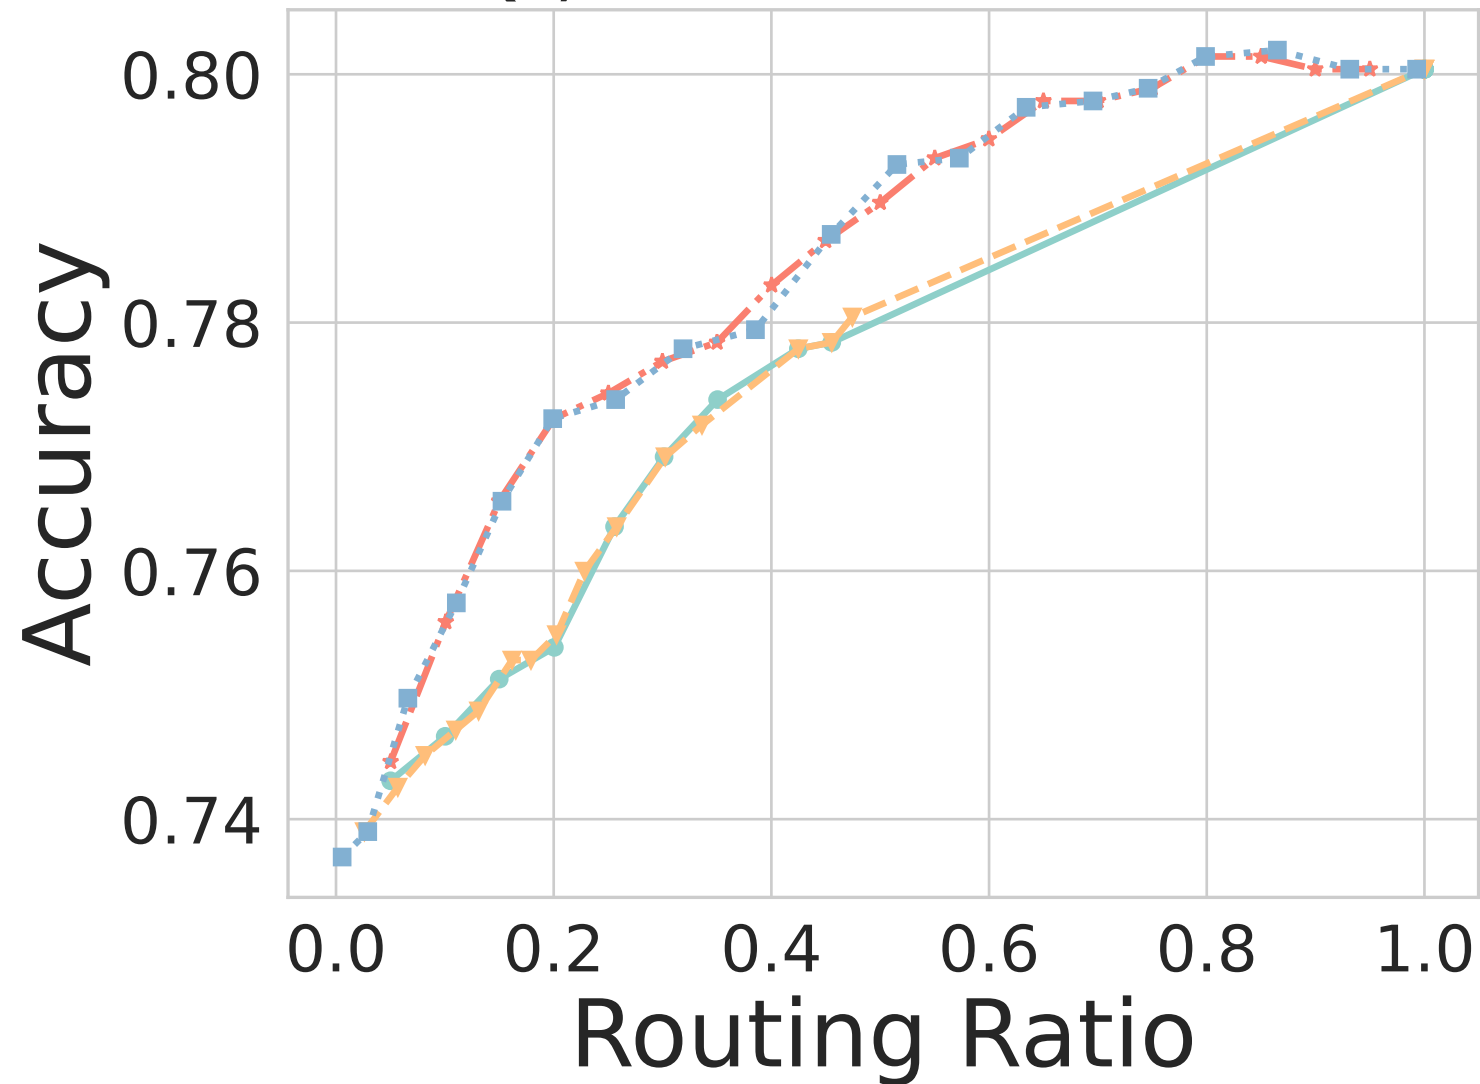

Supplement: supplementary_material [file cali_down_social_i_qa_llama-3.1-8b_meta-llama_Llama-3.1-70B-Instruct.pdf › Routing_SLM_LLMs/Proxy_routing_prediction/to_meta-llama_Llama-3.1-70B-Instruct/social_i_qa_as_downstream/cali_down_social_i_qa_llama-3.1-8b_meta-llama_Llama-3.1-70B-Instruct.pdf]

**Social IQa, llama-3.2-1b to Llama-3.1-70B**

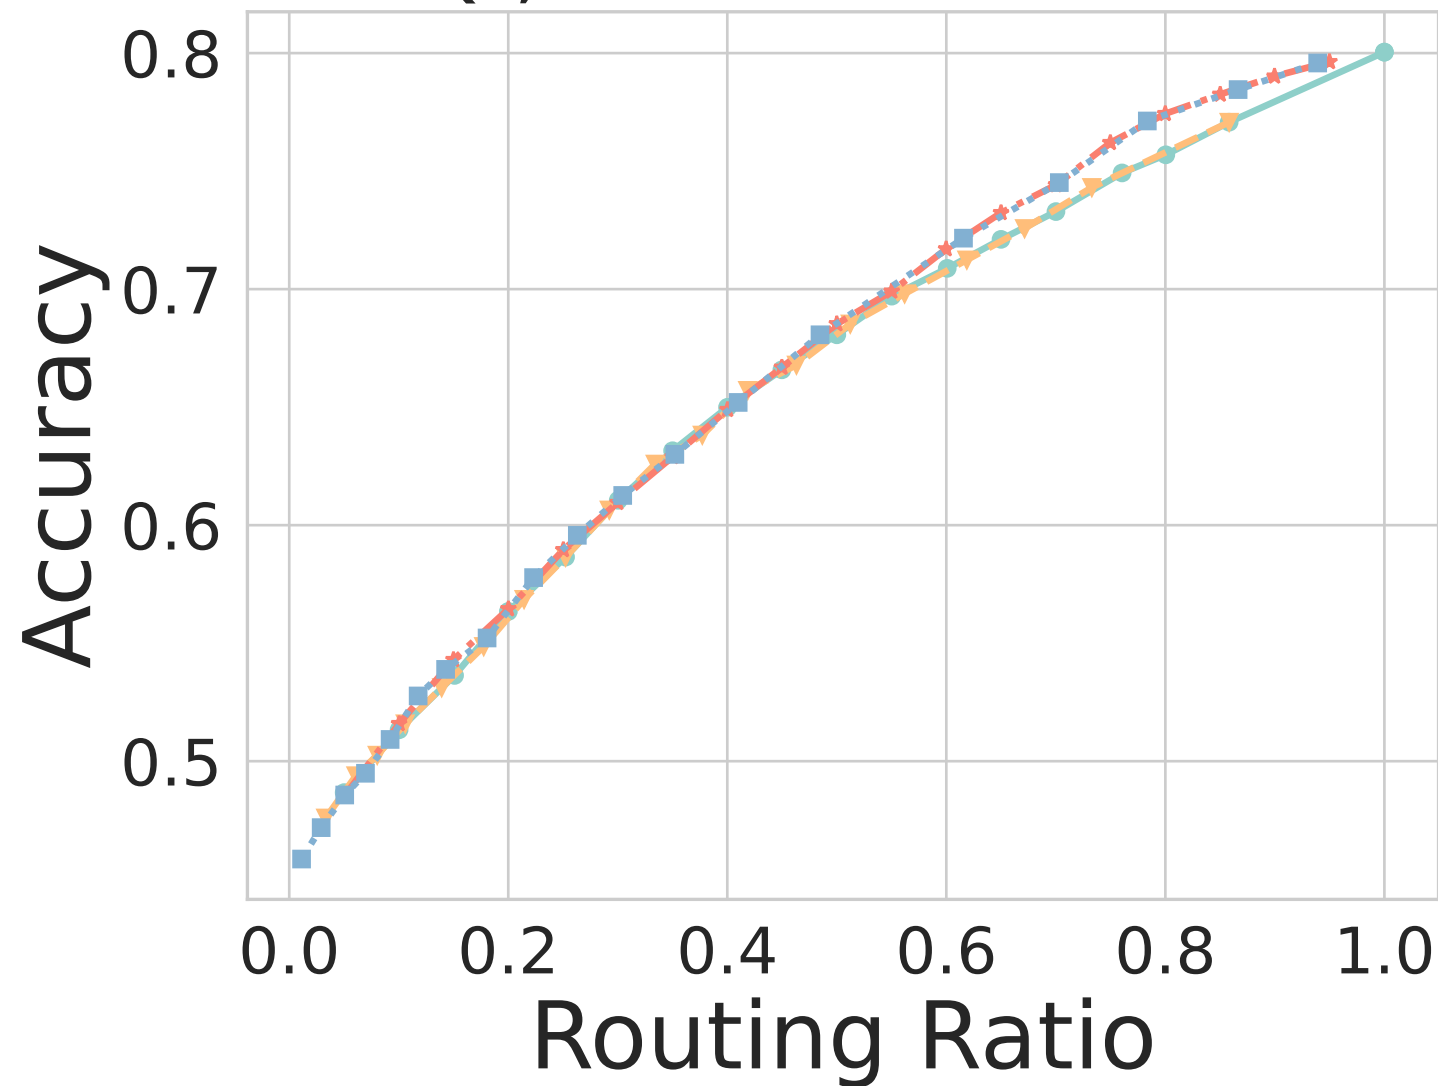

Supplement: supplementary_material [file cali_down_social_i_qa_llama-3.2-1b_meta-llama_Llama-3.1-70B-Instruct.pdf › Routing_SLM_LLMs/Proxy_routing_prediction/to_meta-llama_Llama-3.1-70B-Instruct/social_i_qa_as_downstream/cali_down_social_i_qa_llama-3.2-1b_meta-llama_Llama-3.1-70B-Instruct.pdf]

**Social IQa, llama-3.2-3b to Llama-3.1-70B**

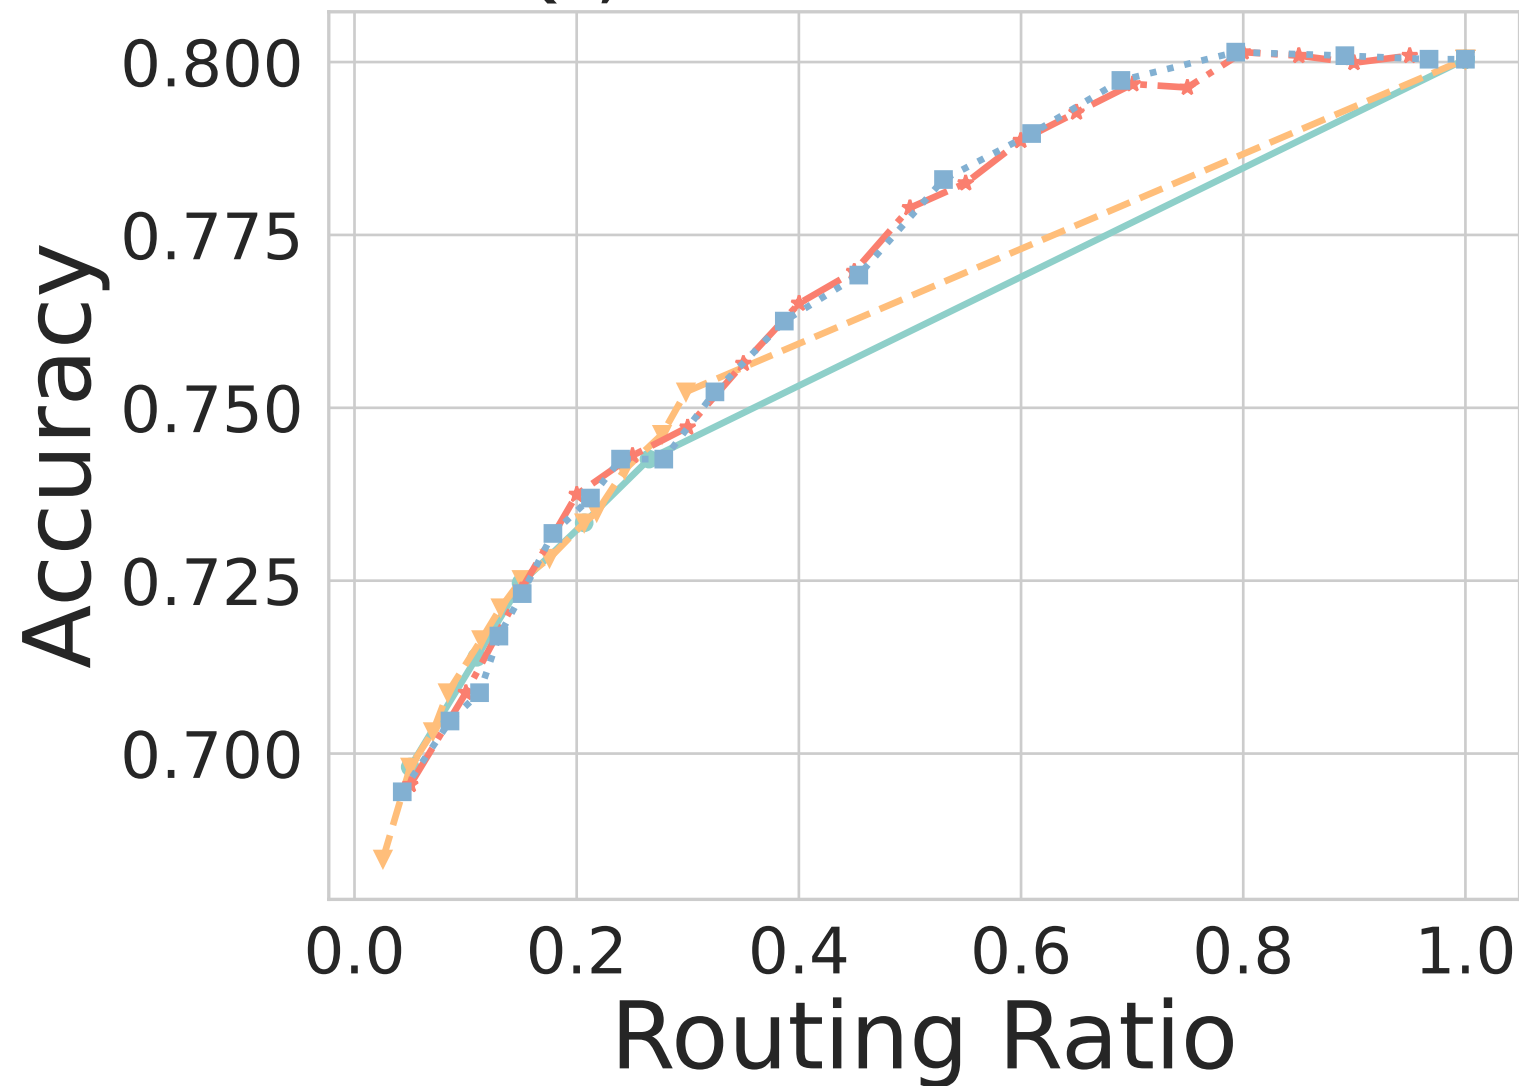

Supplement: supplementary_material [file cali_down_social_i_qa_llama-3.2-3b_meta-llama_Llama-3.1-70B-Instruct.pdf › Routing_SLM_LLMs/Proxy_routing_prediction/to_meta-llama_Llama-3.1-70B-Instruct/social_i_qa_as_downstream/cali_down_social_i_qa_llama-3.2-3b_meta-llama_Llama-3.1-70B-Instruct.pdf]

**Social IQa, mistral-7b to Llama-3.1-70B**

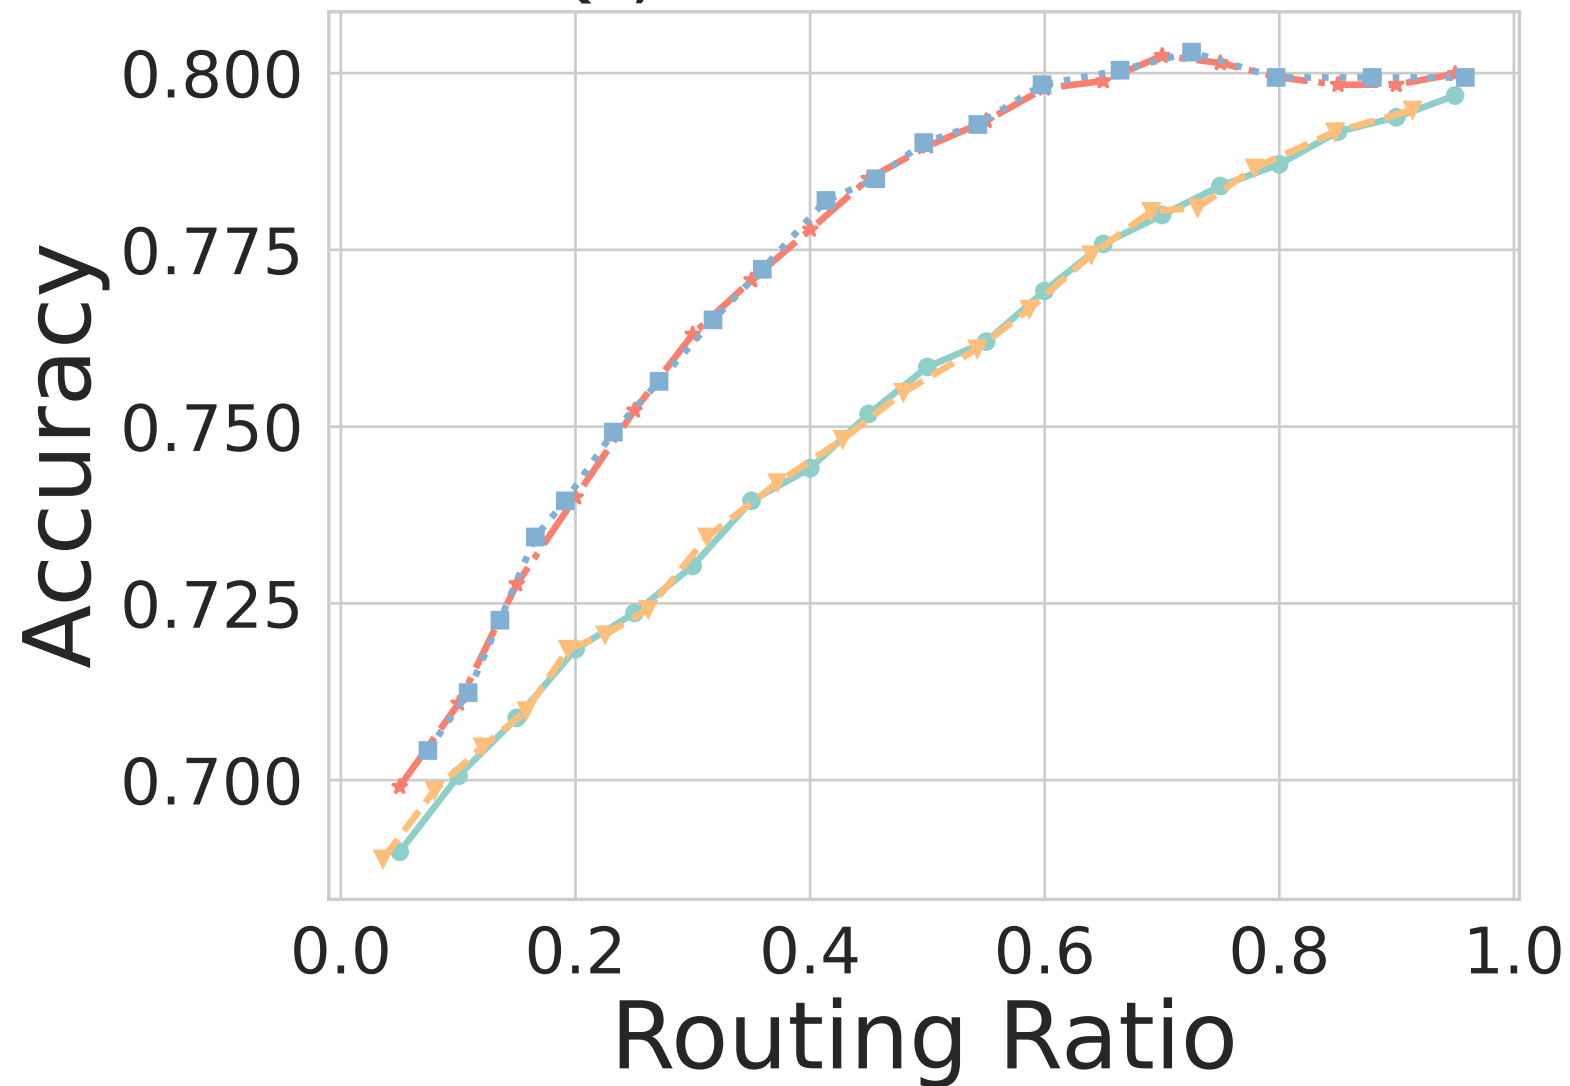

Supplement: supplementary_material [file cali_down_social_i_qa_mistral-7b_meta-llama_Llama-3.1-70B-Instruct.pdf › Routing_SLM_LLMs/Proxy_routing_prediction/to_meta-llama_Llama-3.1-70B-Instruct/social_i_qa_as_downstream/cali_down_social_i_qa_mistral-7b_meta-llama_Llama-3.1-70B-Instruct.pdf]

**Social IQa, phi-3.5-mini to Llama-3.1-70B**

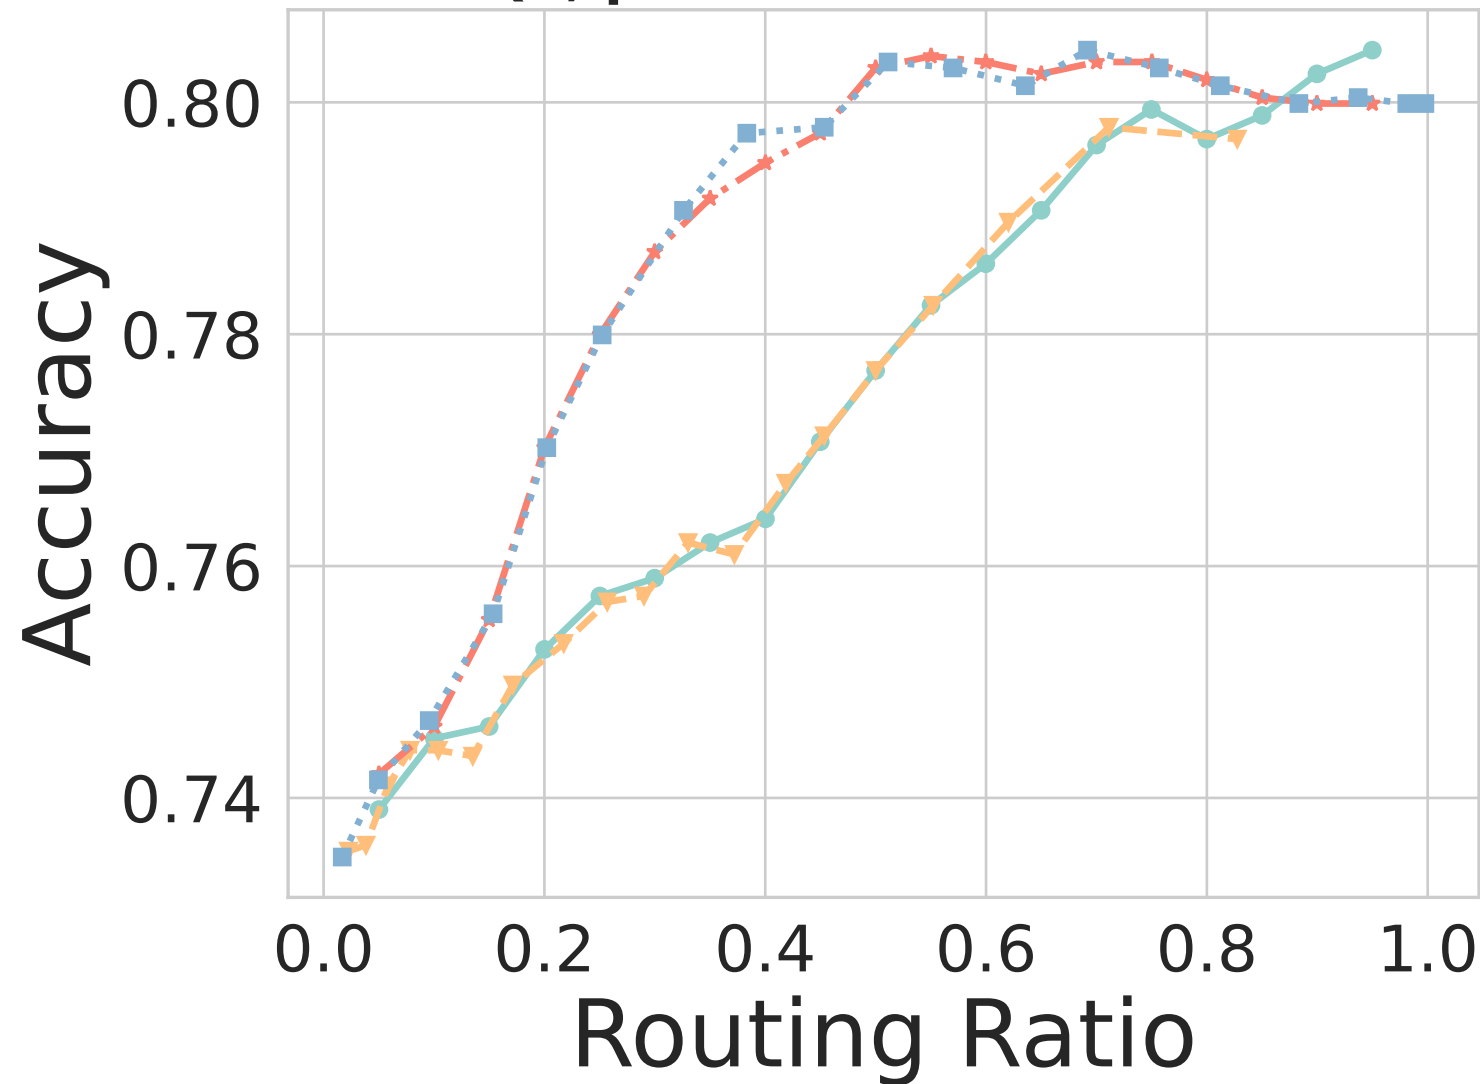

Supplement: supplementary_material [file cali_down_social_i_qa_phi-3.5-mini_meta-llama_Llama-3.1-70B-Instruct.pdf › Routing_SLM_LLMs/Proxy_routing_prediction/to_meta-llama_Llama-3.1-70B-Instruct/social_i_qa_as_downstream/cali_down_social_i_qa_phi-3.5-mini_meta-llama_Llama-3.1-70B-Instruct.pdf]

**Social IQa, phi-4-mini-reasoning to Llama-3.1-70B**

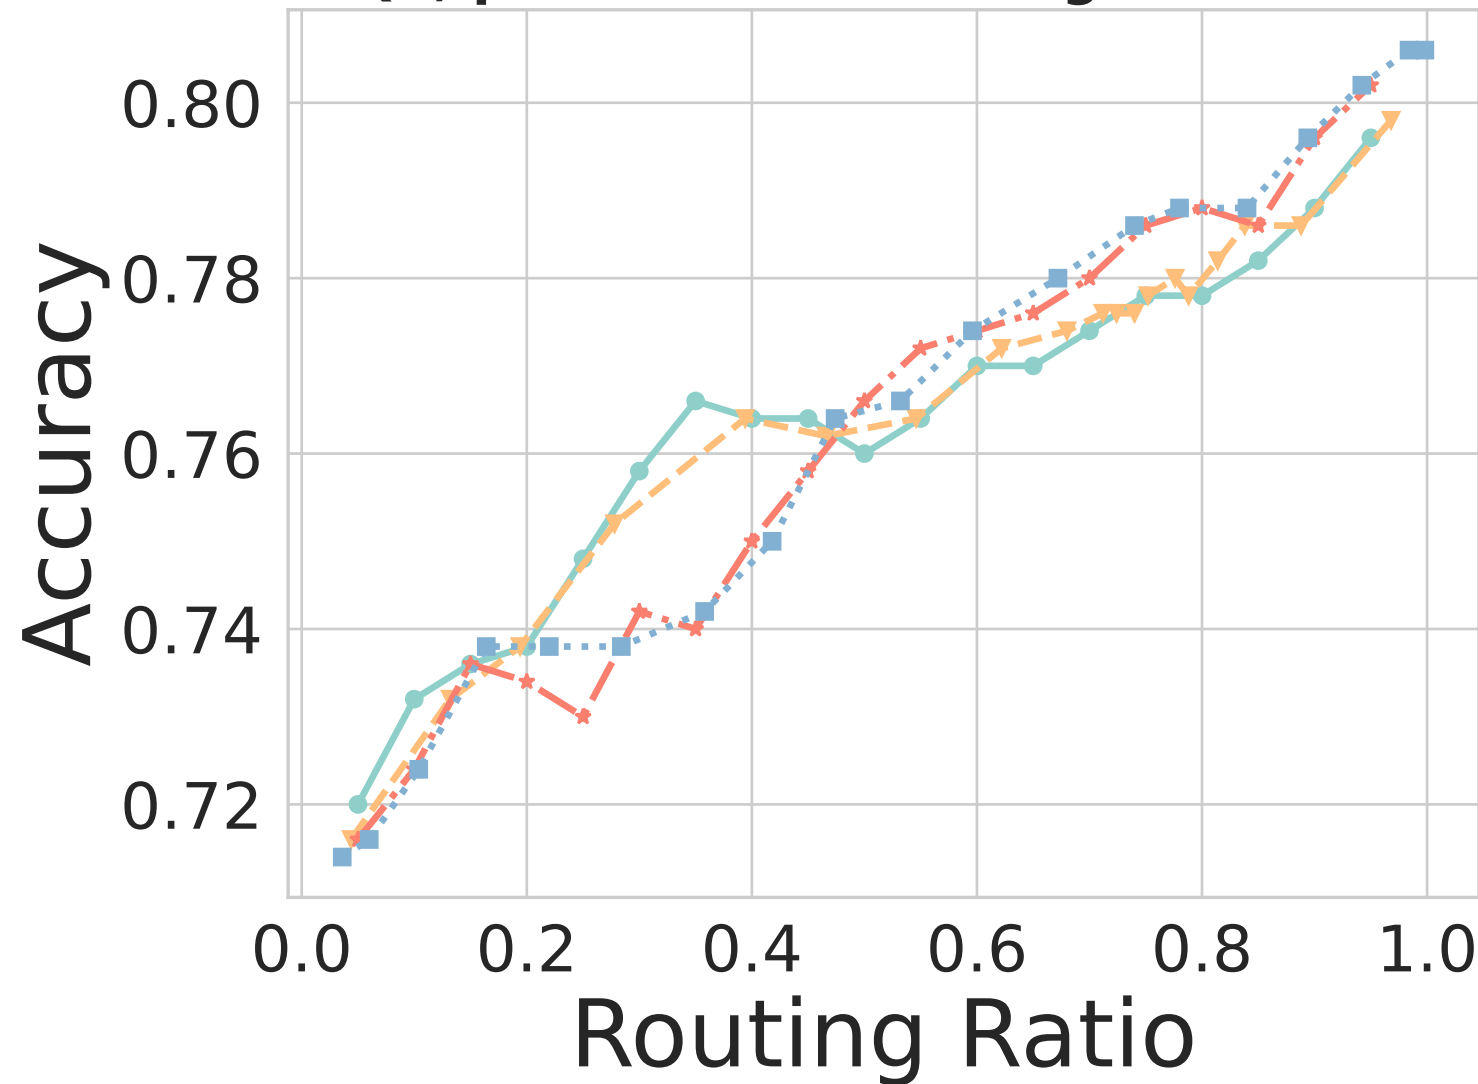

Supplement: supplementary_material [file cali_down_social_i_qa_phi-4-mini-reasoning_meta-llama_Llama-3.1-70B-Instruct.pdf › Routing_SLM_LLMs/Proxy_routing_prediction/to_meta-llama_Llama-3.1-70B-Instruct/social_i_qa_as_downstream/cali_down_social_i_qa_phi-4-mini-reasoning_meta-llama_Llama-3.1-70B-Instruct.pdf]

**Social IQa, qwen-2.5-7b to Llama-3.1-70B**

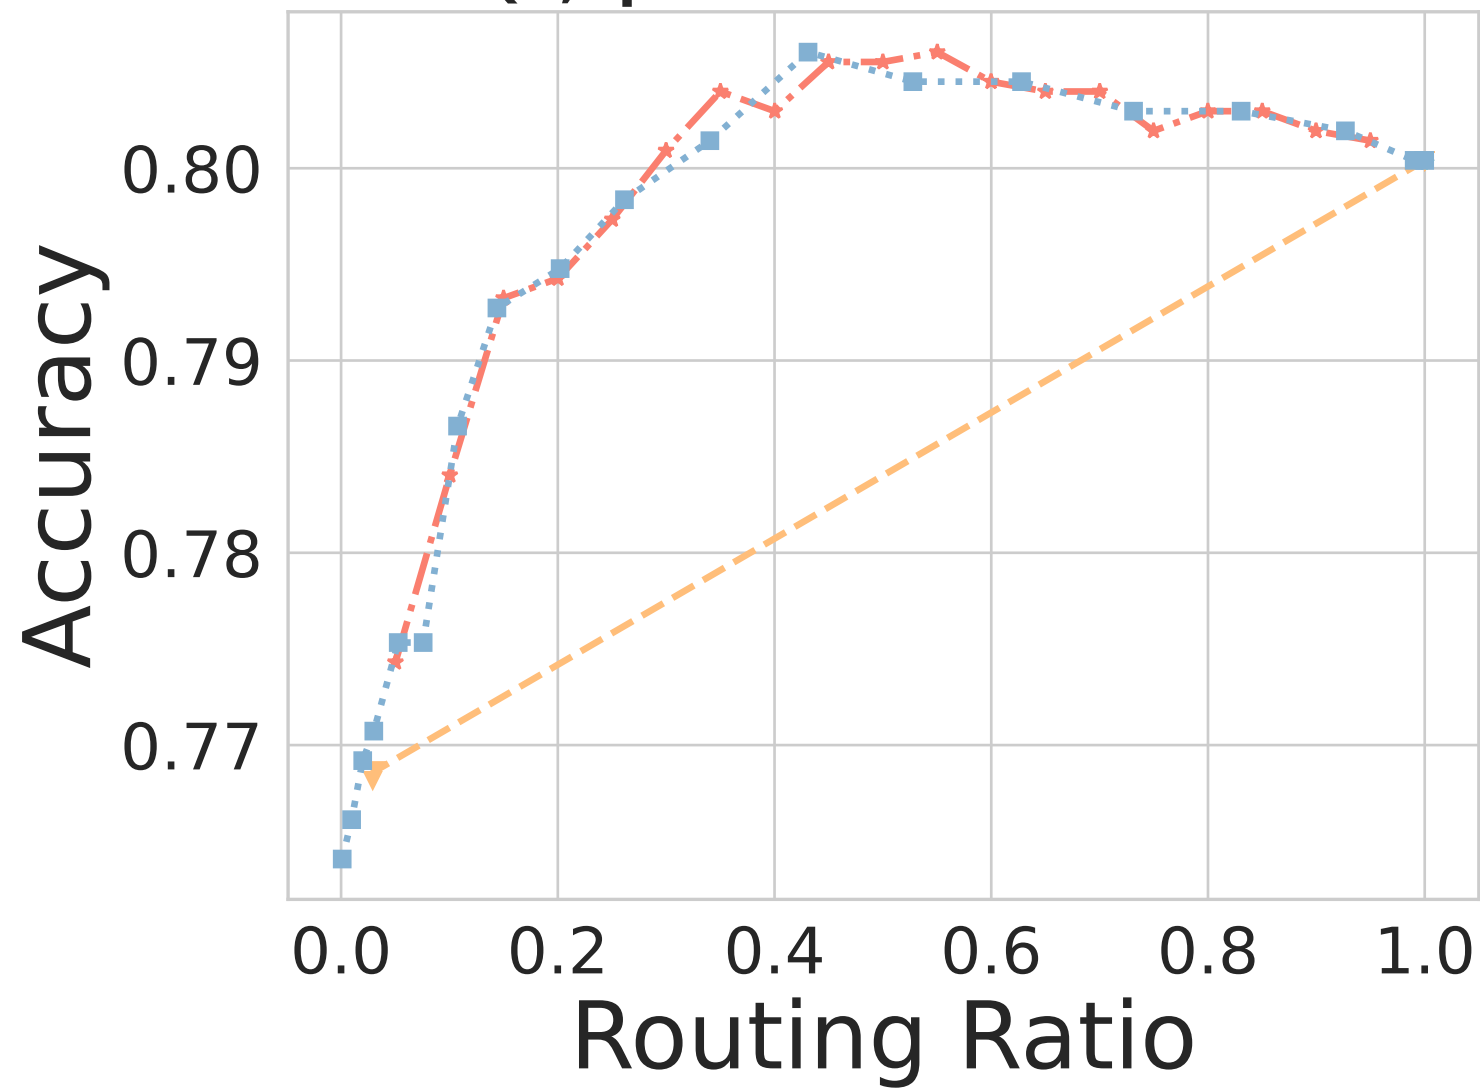

Supplement: supplementary_material [file cali_down_social_i_qa_qwen-2.5-7b_meta-llama_Llama-3.1-70B-Instruct.pdf › Routing_SLM_LLMs/Proxy_routing_prediction/to_meta-llama_Llama-3.1-70B-Instruct/social_i_qa_as_downstream/cali_down_social_i_qa_qwen-2.5-7b_meta-llama_Llama-3.1-70B-Instruct.pdf]

**Social IQa, rwkv to Llama-3.1-70B**

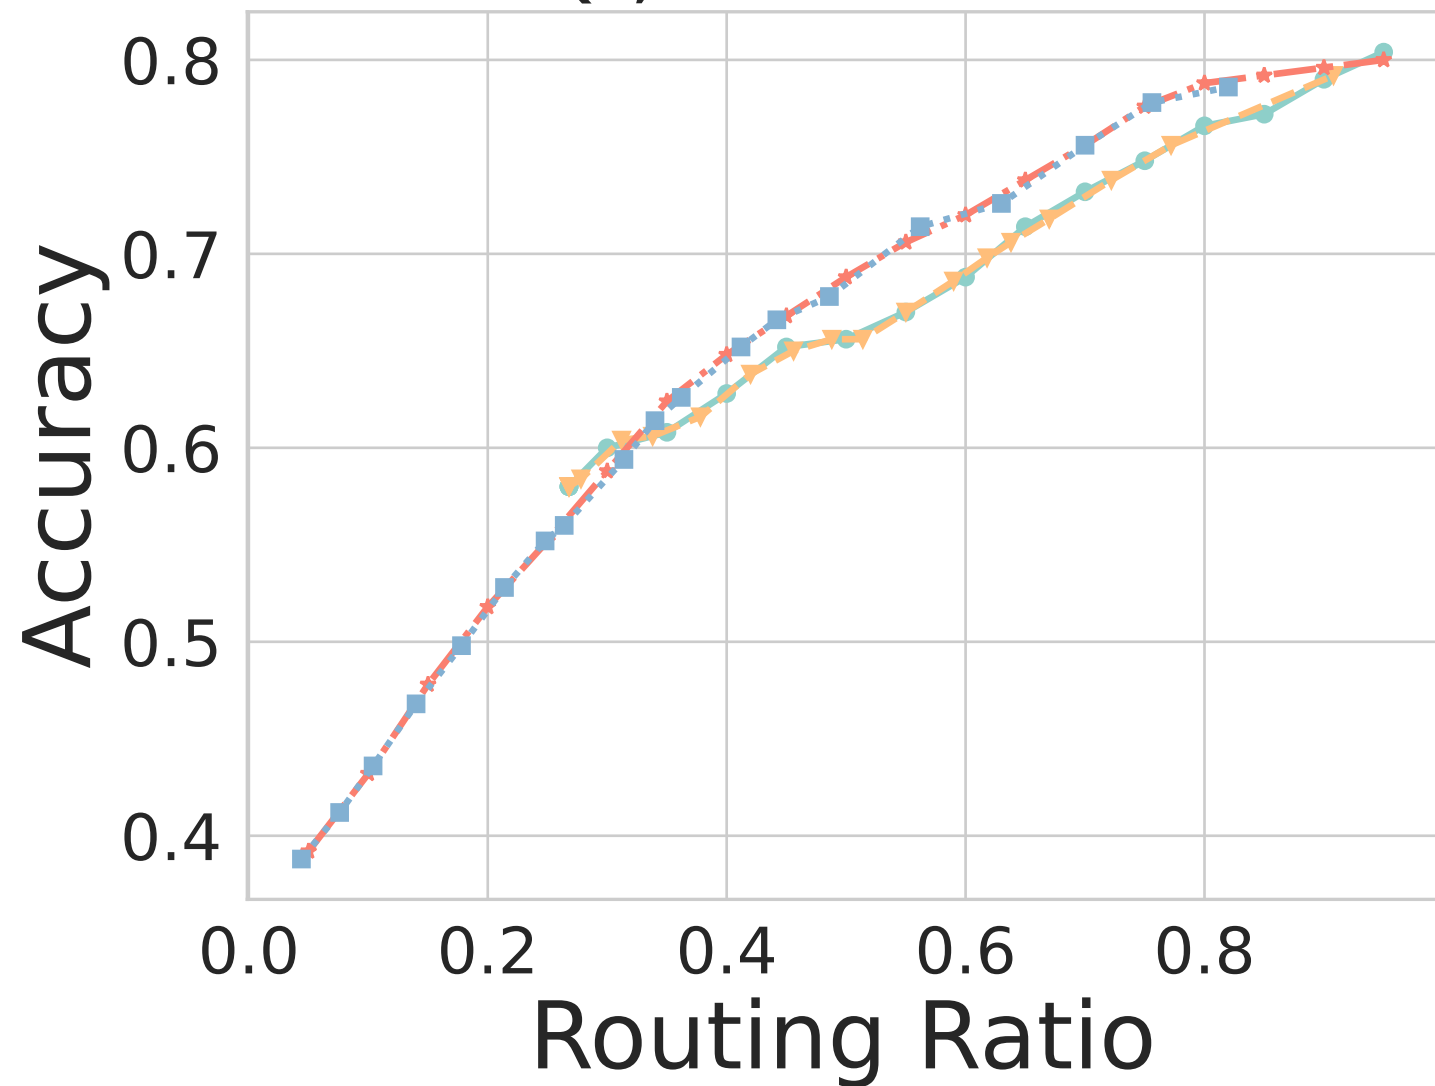

Supplement: supplementary_material [file cali_down_social_i_qa_rwkv_meta-llama_Llama-3.1-70B-Instruct.pdf › Routing_SLM_LLMs/Proxy_routing_prediction/to_meta-llama_Llama-3.1-70B-Instruct/social_i_qa_as_downstream/cali_down_social_i_qa_rwkv_meta-llama_Llama-3.1-70B-Instruct.pdf]

**SVAMP, Qwen3-0.6B to Llama-3.1-70B**

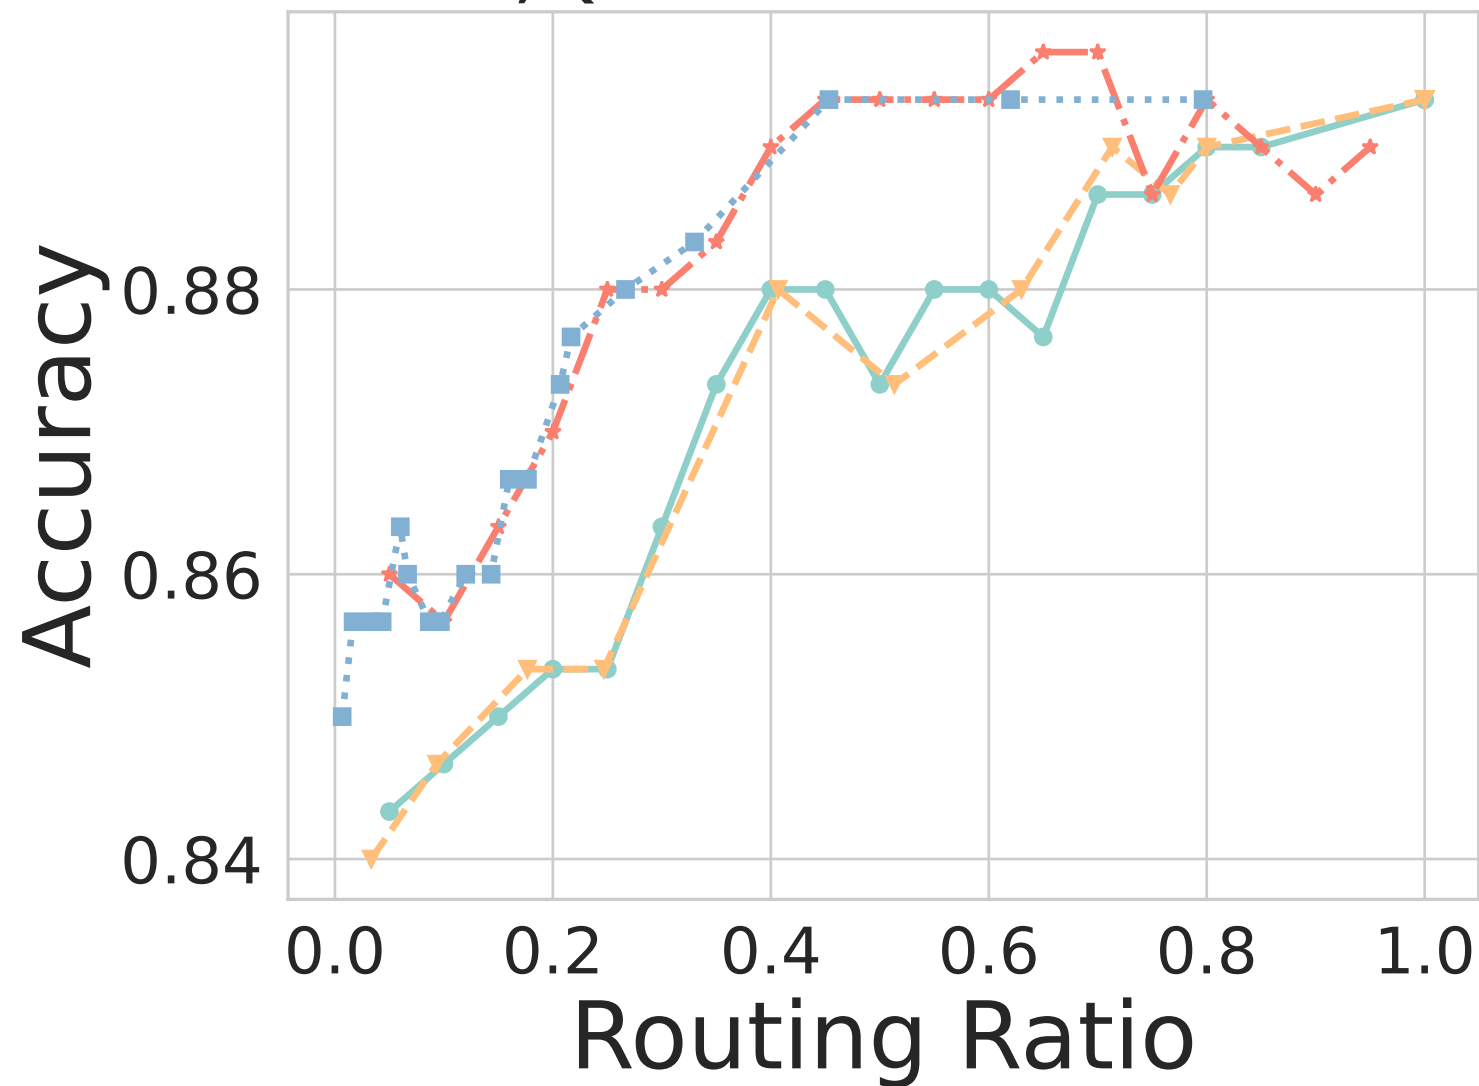

Supplement: supplementary_material [file cali_down_svamp_Qwen3-0.6B_meta-llama_Llama-3.1-70B-Instruct.pdf › Routing_SLM_LLMs/Proxy_routing_prediction/to_meta-llama_Llama-3.1-70B-Instruct/svamp_as_downstream/cali_down_svamp_Qwen3-0.6B_meta-llama_Llama-3.1-70B-Instruct.pdf]

**SVAMP, Qwen3-1.7B to Llama-3.1-70B**

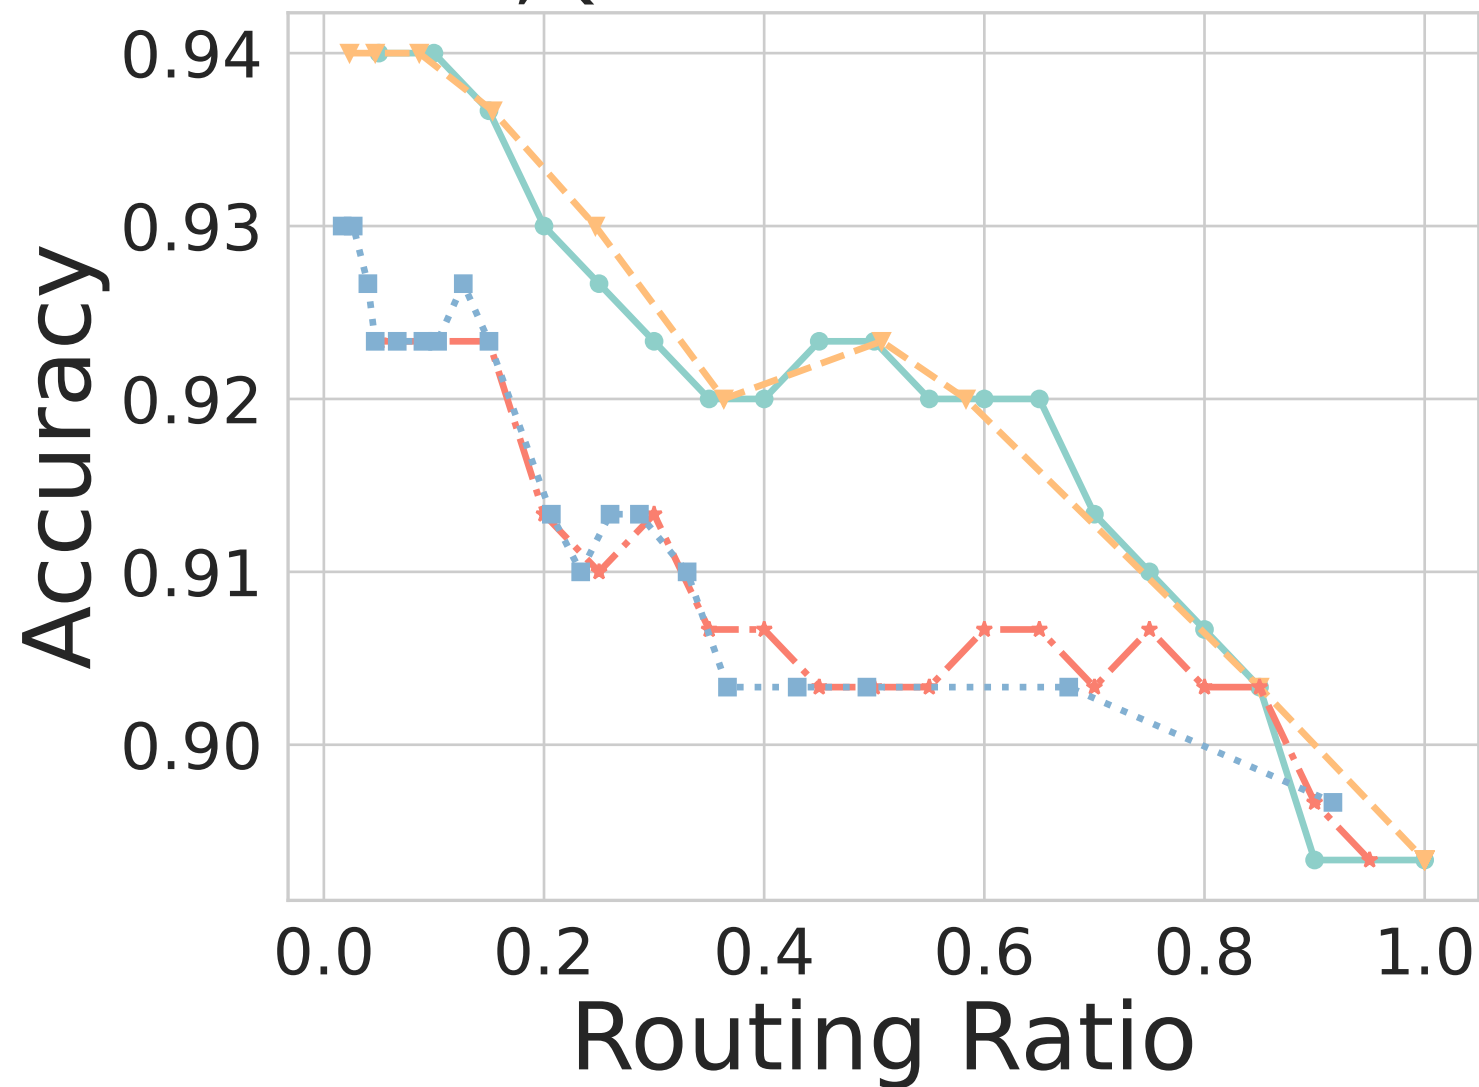

Supplement: supplementary_material [file cali_down_svamp_Qwen3-1.7B_meta-llama_Llama-3.1-70B-Instruct.pdf › Routing_SLM_LLMs/Proxy_routing_prediction/to_meta-llama_Llama-3.1-70B-Instruct/svamp_as_downstream/cali_down_svamp_Qwen3-1.7B_meta-llama_Llama-3.1-70B-Instruct.pdf]

**SVAMP, Qwen3-4B to Llama-3.1-70B**

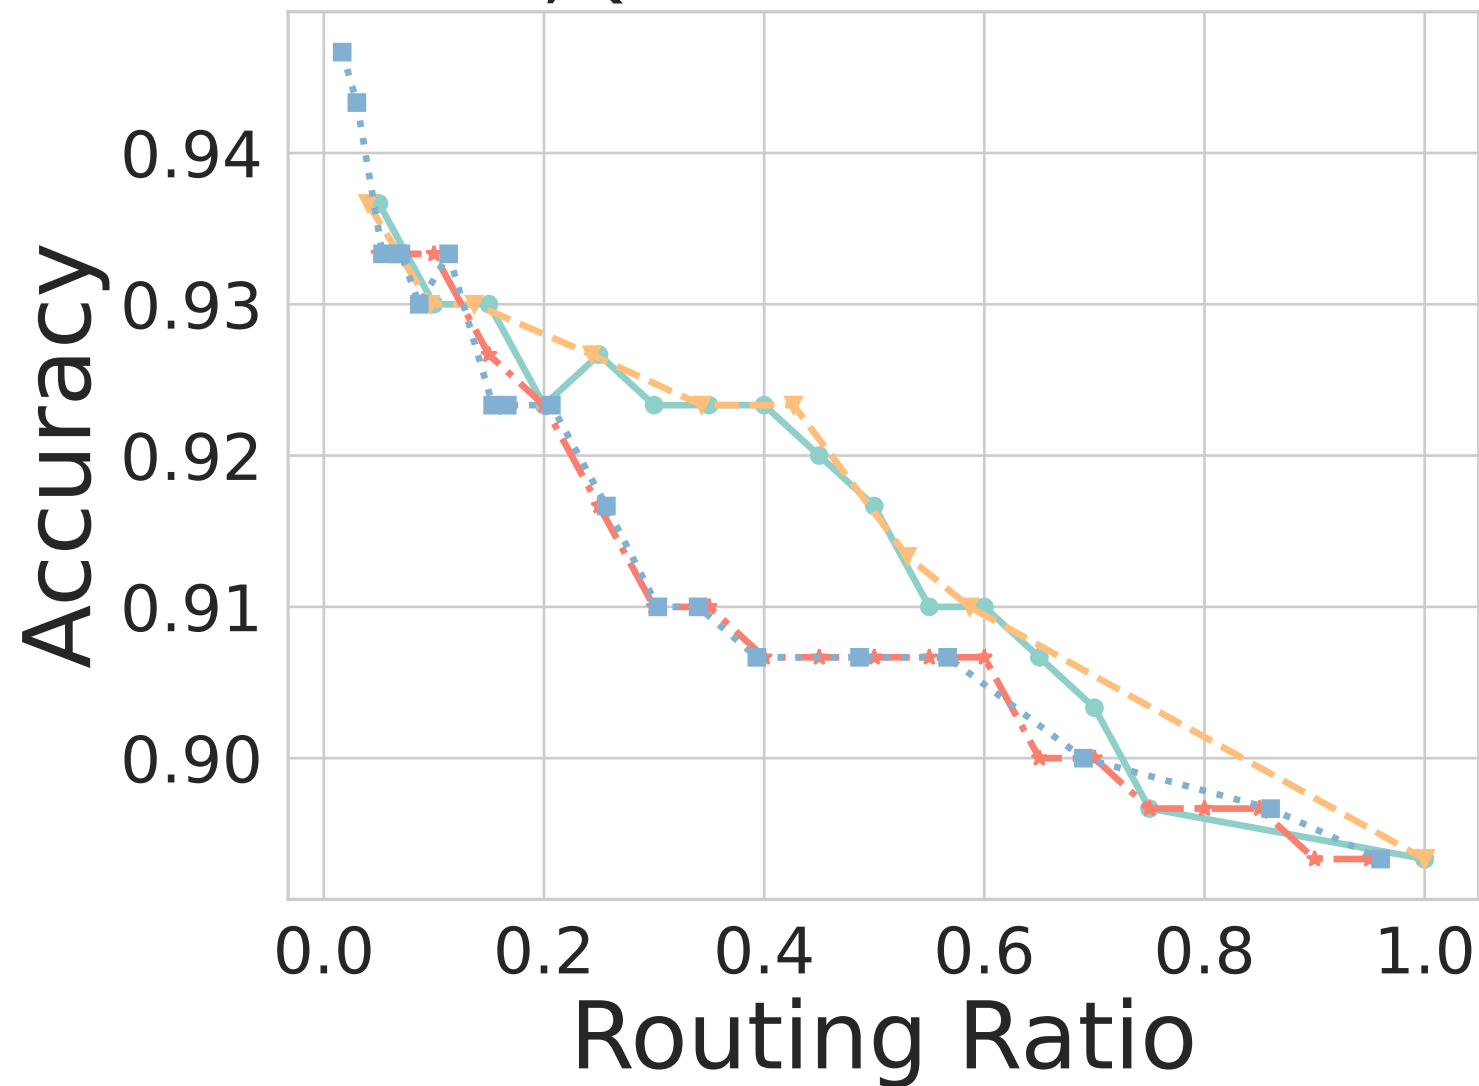

Supplement: supplementary_material [file cali_down_svamp_Qwen3-4B_meta-llama_Llama-3.1-70B-Instruct.pdf › Routing_SLM_LLMs/Proxy_routing_prediction/to_meta-llama_Llama-3.1-70B-Instruct/svamp_as_downstream/cali_down_svamp_Qwen3-4B_meta-llama_Llama-3.1-70B-Instruct.pdf]

**SVAMP, granite-3.1-8b to Llama-3.1-70B**

Accuracy

0.90  
0.85  
0.80  
0.75

0.0 0.2 0.4 0.6 0.8 1.0  
Routing Ratio

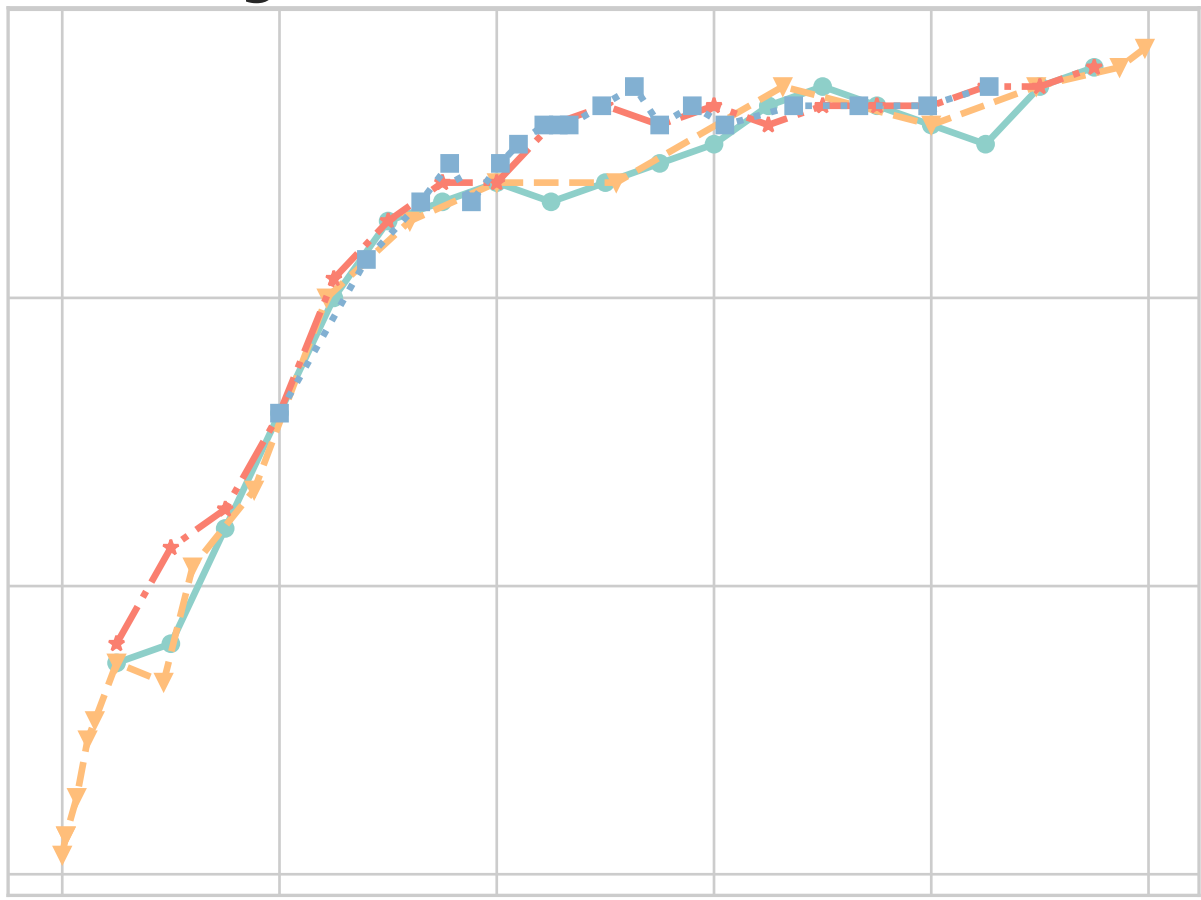

Supplement: supplementary_material [file cali_down_svamp_granite-3.1-8b_meta-llama_Llama-3.1-70B-Instruct.pdf › Routing_SLM_LLMs/Proxy_routing_prediction/to_meta-llama_Llama-3.1-70B-Instruct/svamp_as_downstream/cali_down_svamp_granite-3.1-8b_meta-llama_Llama-3.1-70B-Instruct.pdf]

**SVAMP, llama-3.1-8b to Llama-3.1-70B**

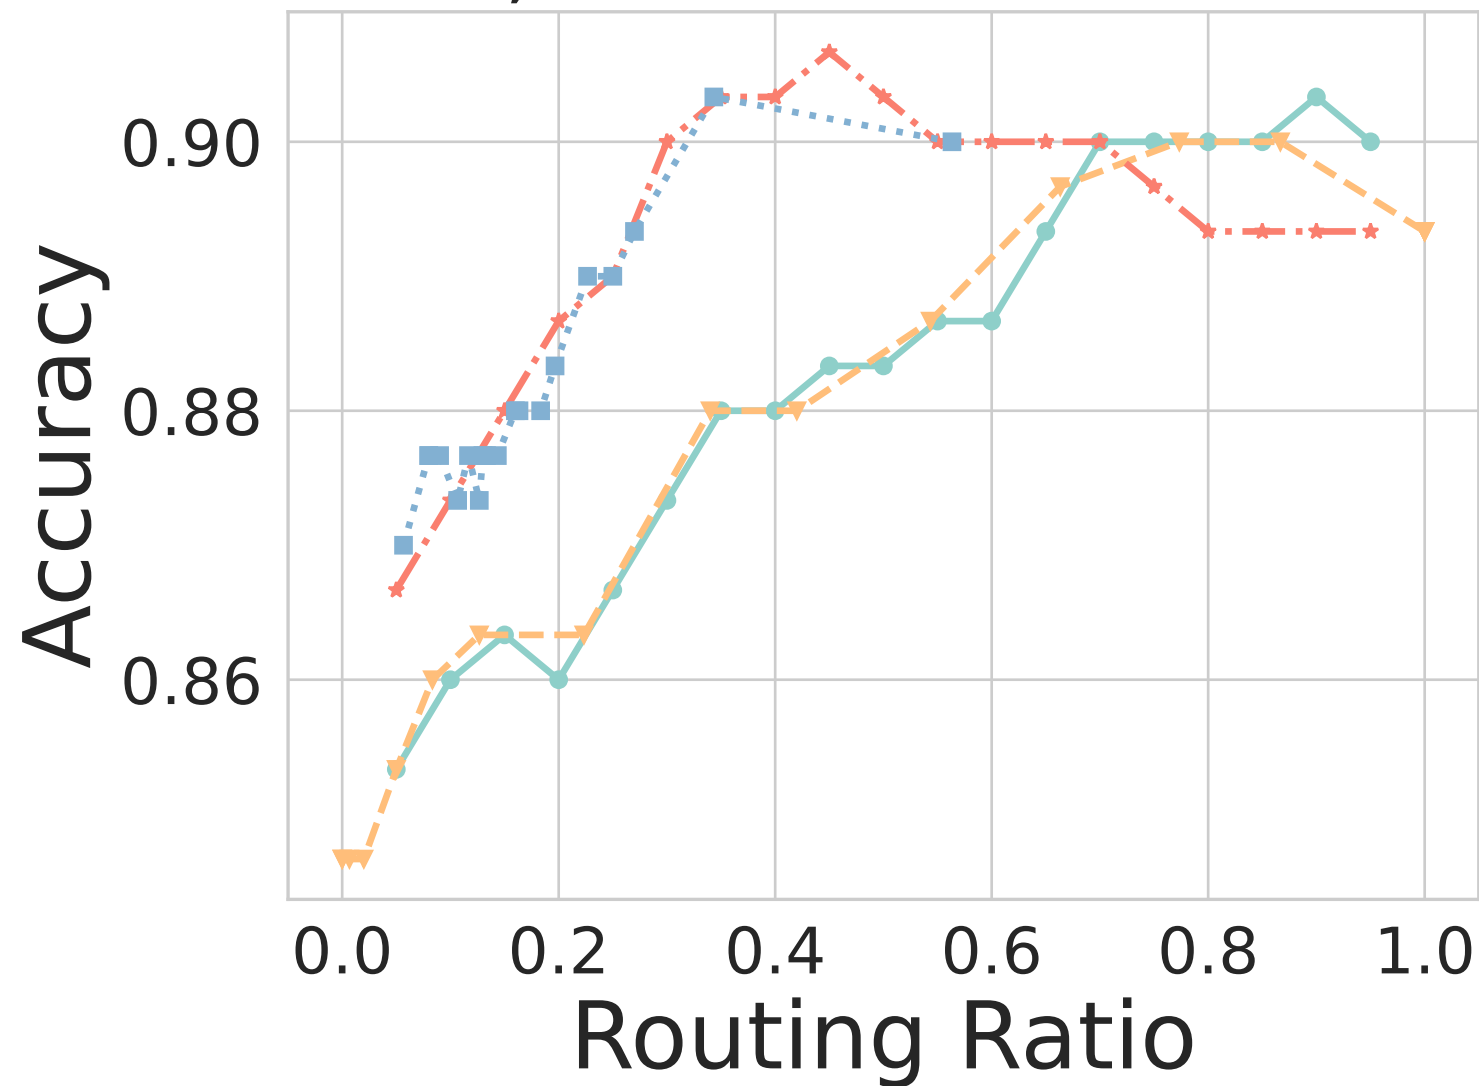

Supplement: supplementary_material [file cali_down_svamp_llama-3.1-8b_meta-llama_Llama-3.1-70B-Instruct.pdf › Routing_SLM_LLMs/Proxy_routing_prediction/to_meta-llama_Llama-3.1-70B-Instruct/svamp_as_downstream/cali_down_svamp_llama-3.1-8b_meta-llama_Llama-3.1-70B-Instruct.pdf]

**SVAMP, llama-3.2-1b to Llama-3.1-70B**

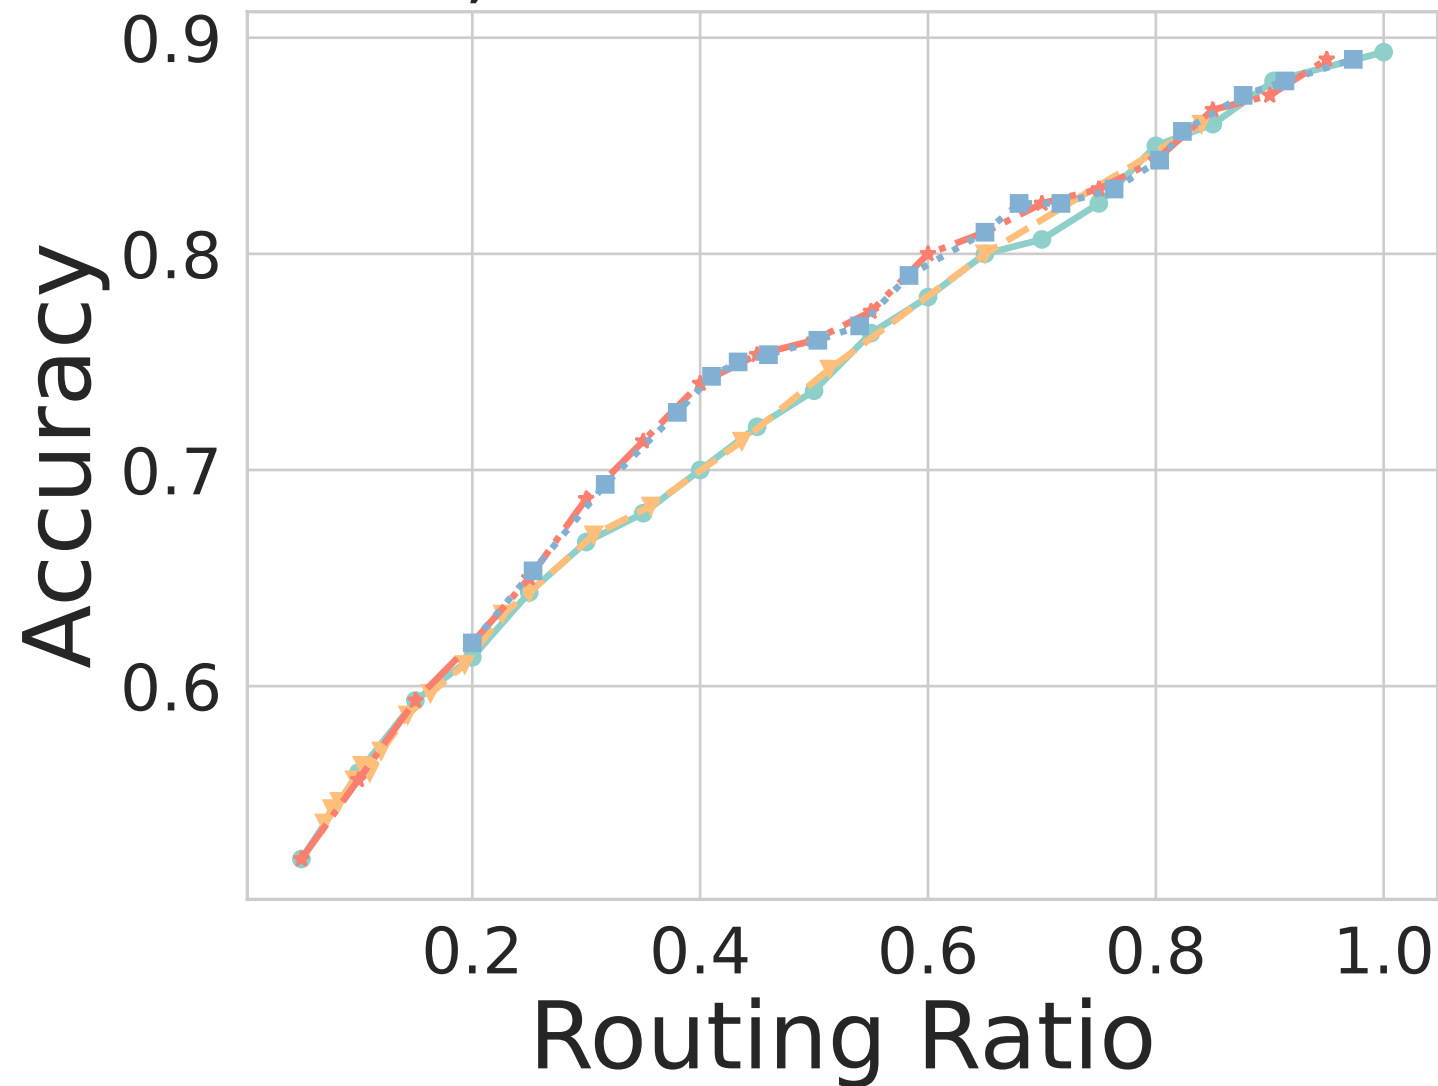

Supplement: supplementary_material [file cali_down_svamp_llama-3.2-1b_meta-llama_Llama-3.1-70B-Instruct.pdf › Routing_SLM_LLMs/Proxy_routing_prediction/to_meta-llama_Llama-3.1-70B-Instruct/svamp_as_downstream/cali_down_svamp_llama-3.2-1b_meta-llama_Llama-3.1-70B-Instruct.pdf]

**SVAMP, llama-3.2-3b to Llama-3.1-70B**

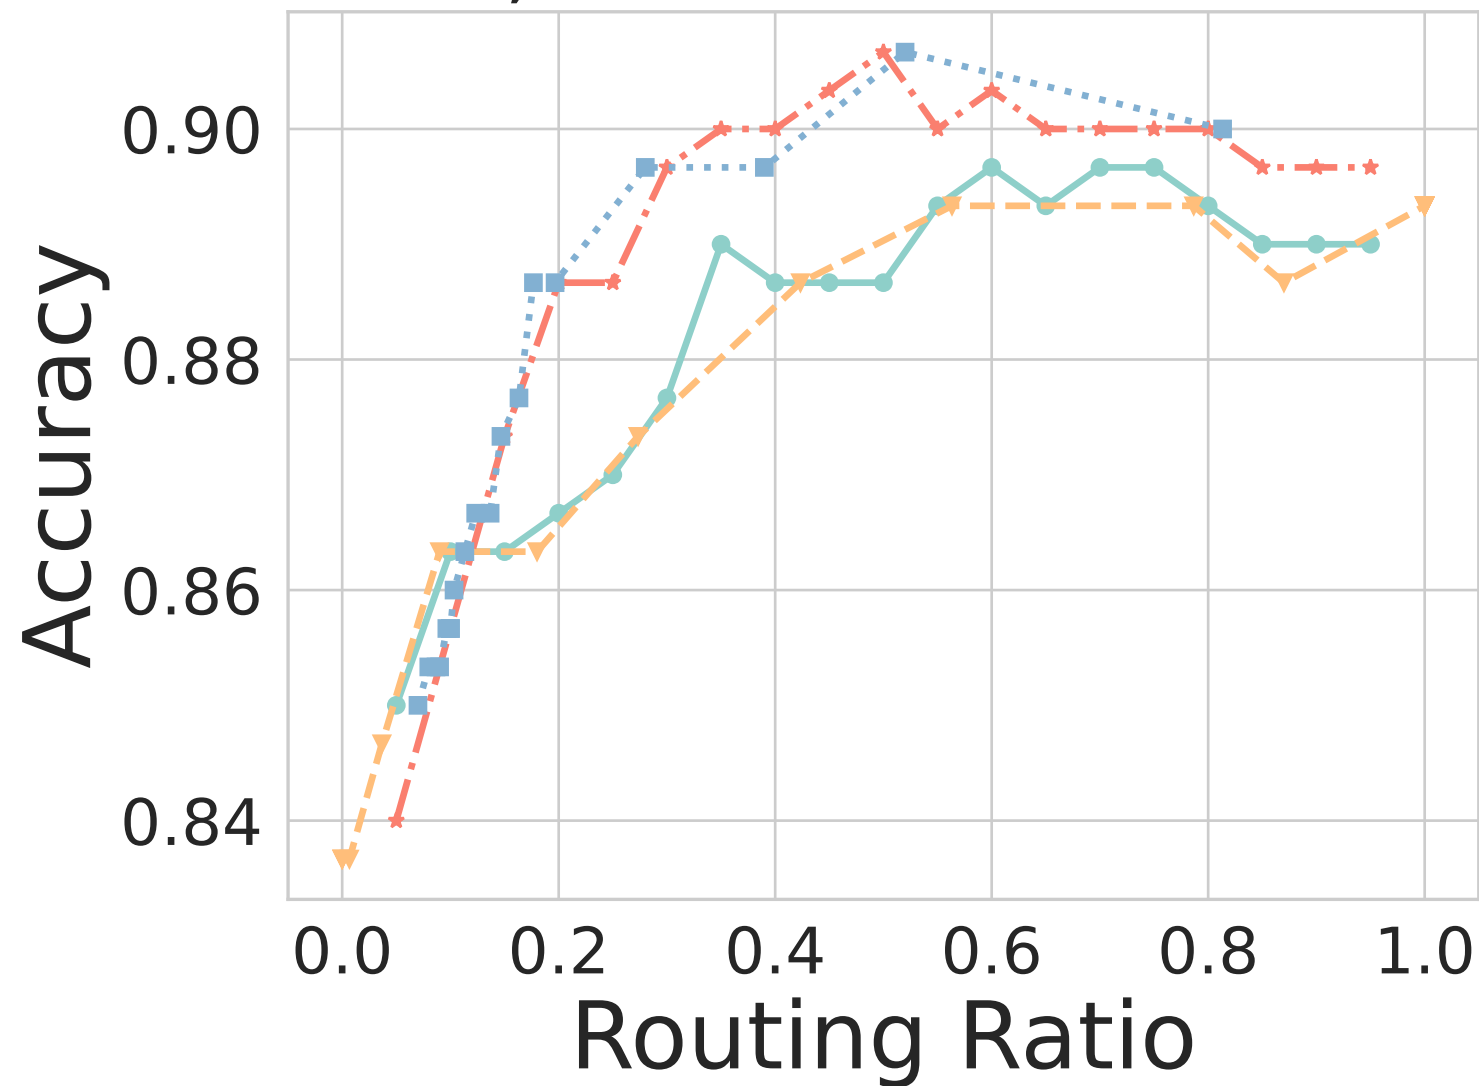

Supplement: supplementary_material [file cali_down_svamp_llama-3.2-3b_meta-llama_Llama-3.1-70B-Instruct.pdf › Routing_SLM_LLMs/Proxy_routing_prediction/to_meta-llama_Llama-3.1-70B-Instruct/svamp_as_downstream/cali_down_svamp_llama-3.2-3b_meta-llama_Llama-3.1-70B-Instruct.pdf]

**SVAMP, mistral-7b to Llama-3.1-70B**

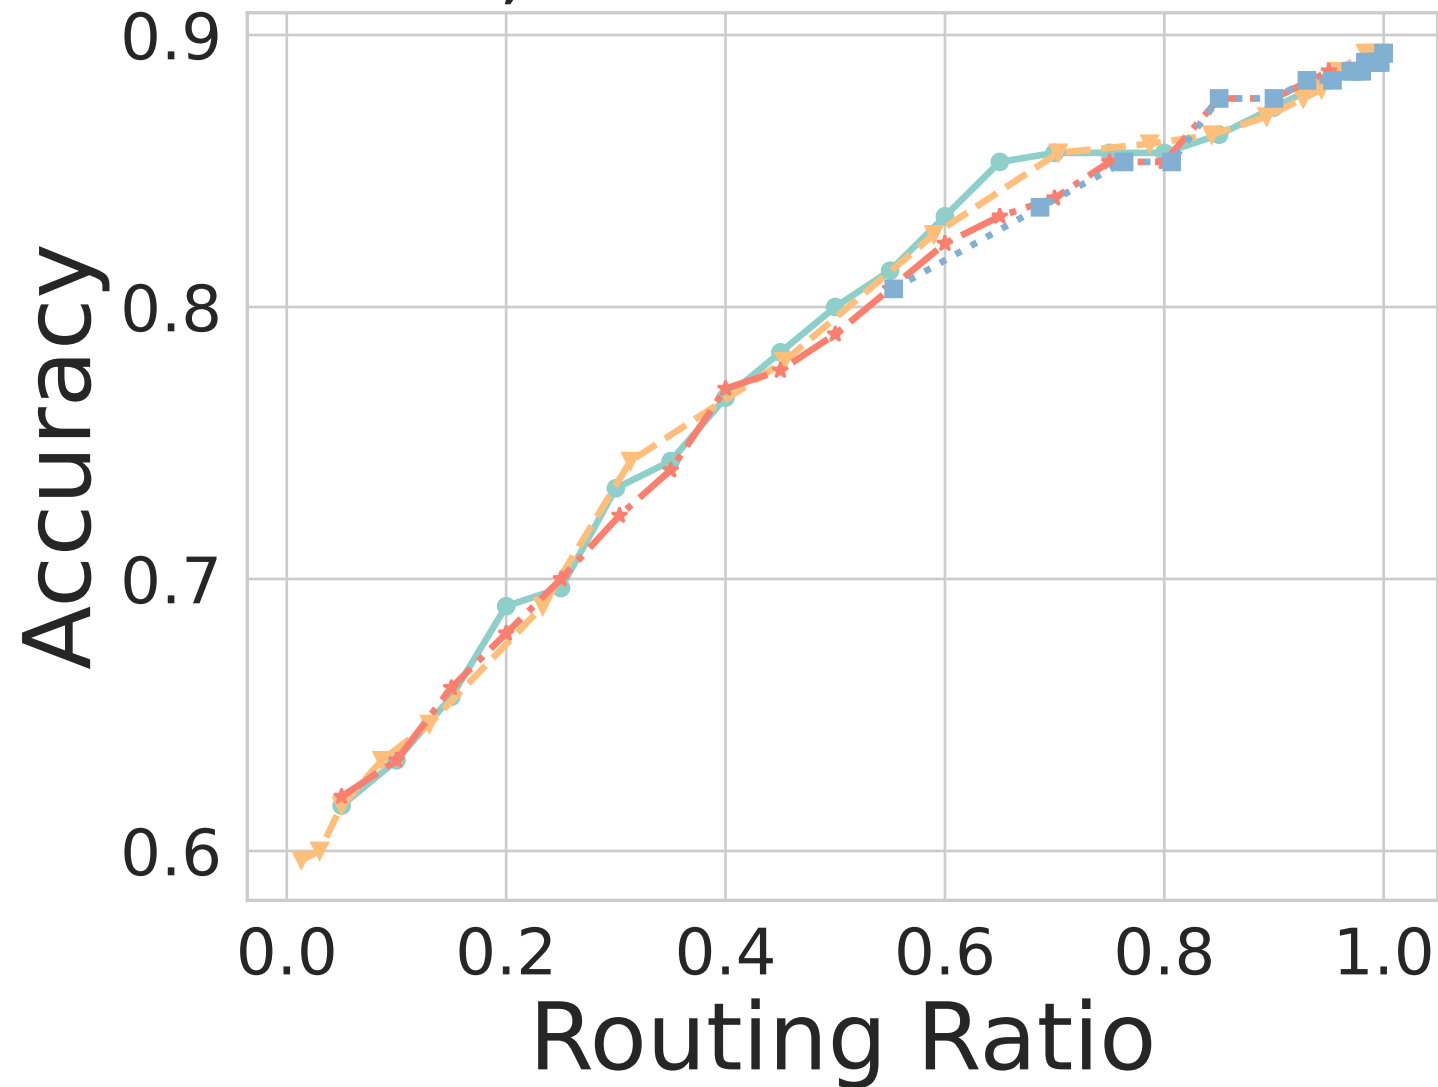

Supplement: supplementary_material [file cali_down_svamp_mistral-7b_meta-llama_Llama-3.1-70B-Instruct.pdf › Routing_SLM_LLMs/Proxy_routing_prediction/to_meta-llama_Llama-3.1-70B-Instruct/svamp_as_downstream/cali_down_svamp_mistral-7b_meta-llama_Llama-3.1-70B-Instruct.pdf]

**SVAMP, phi-3.5-mini to Llama-3.1-70B**

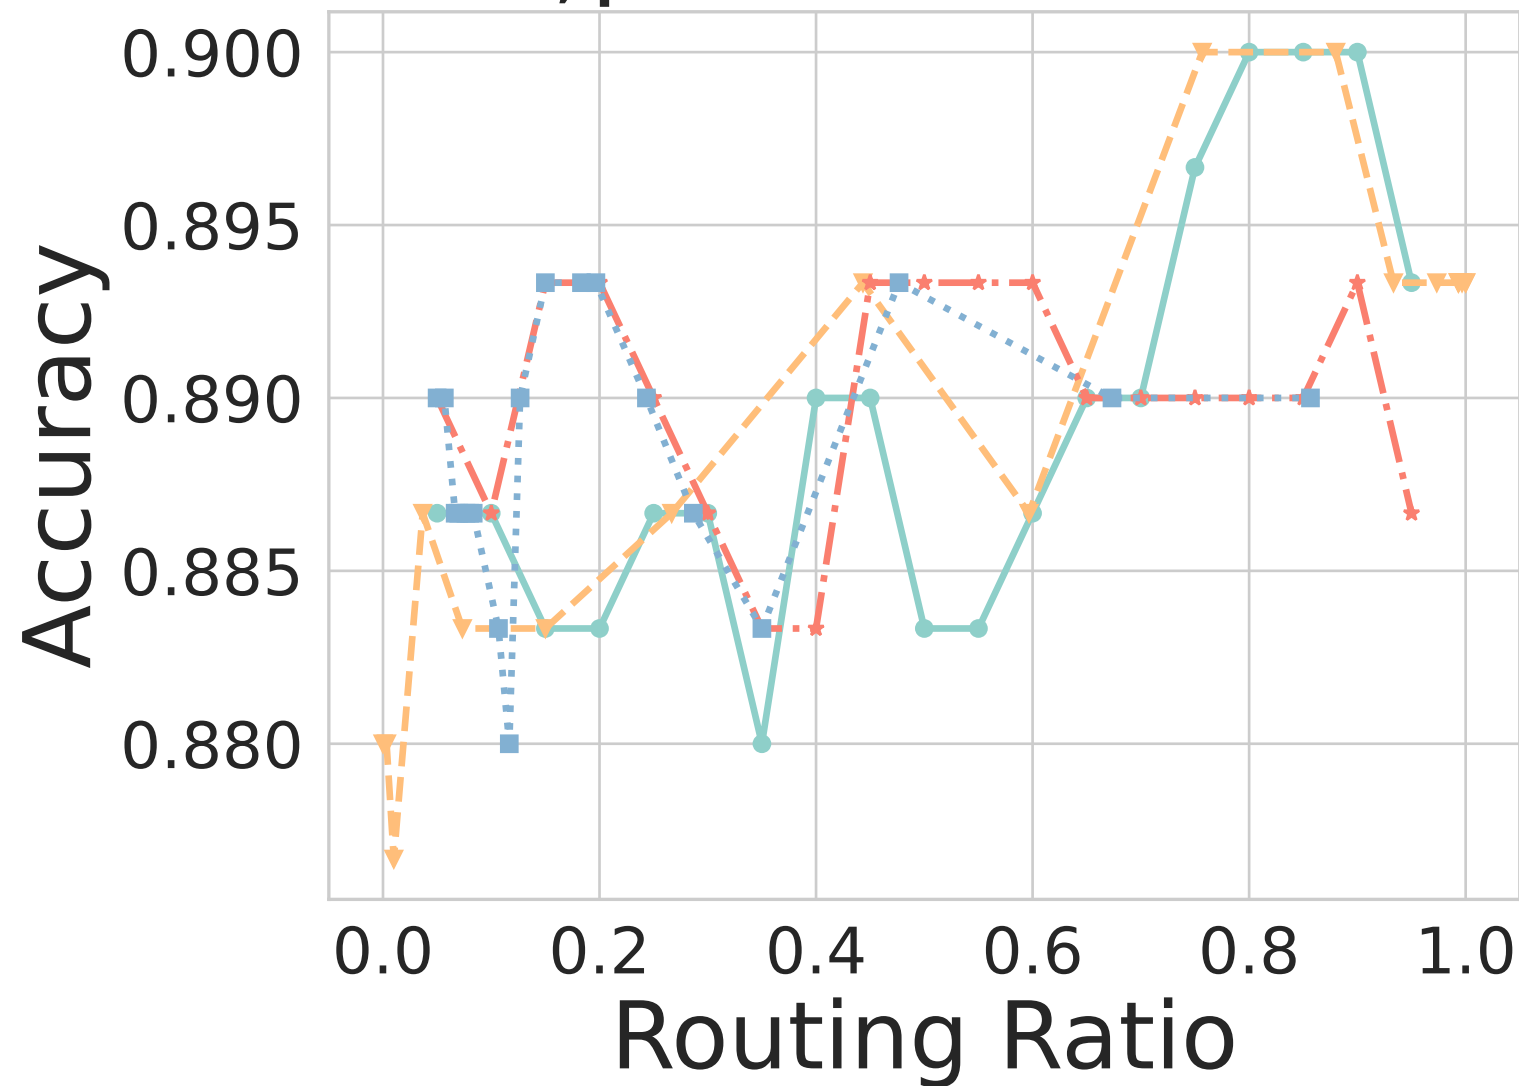

Supplement: supplementary_material [file cali_down_svamp_phi-3.5-mini_meta-llama_Llama-3.1-70B-Instruct.pdf › Routing_SLM_LLMs/Proxy_routing_prediction/to_meta-llama_Llama-3.1-70B-Instruct/svamp_as_downstream/cali_down_svamp_phi-3.5-mini_meta-llama_Llama-3.1-70B-Instruct.pdf]

# SVAMP, phi-4-mini-reasoning to Llama-3.1-70B

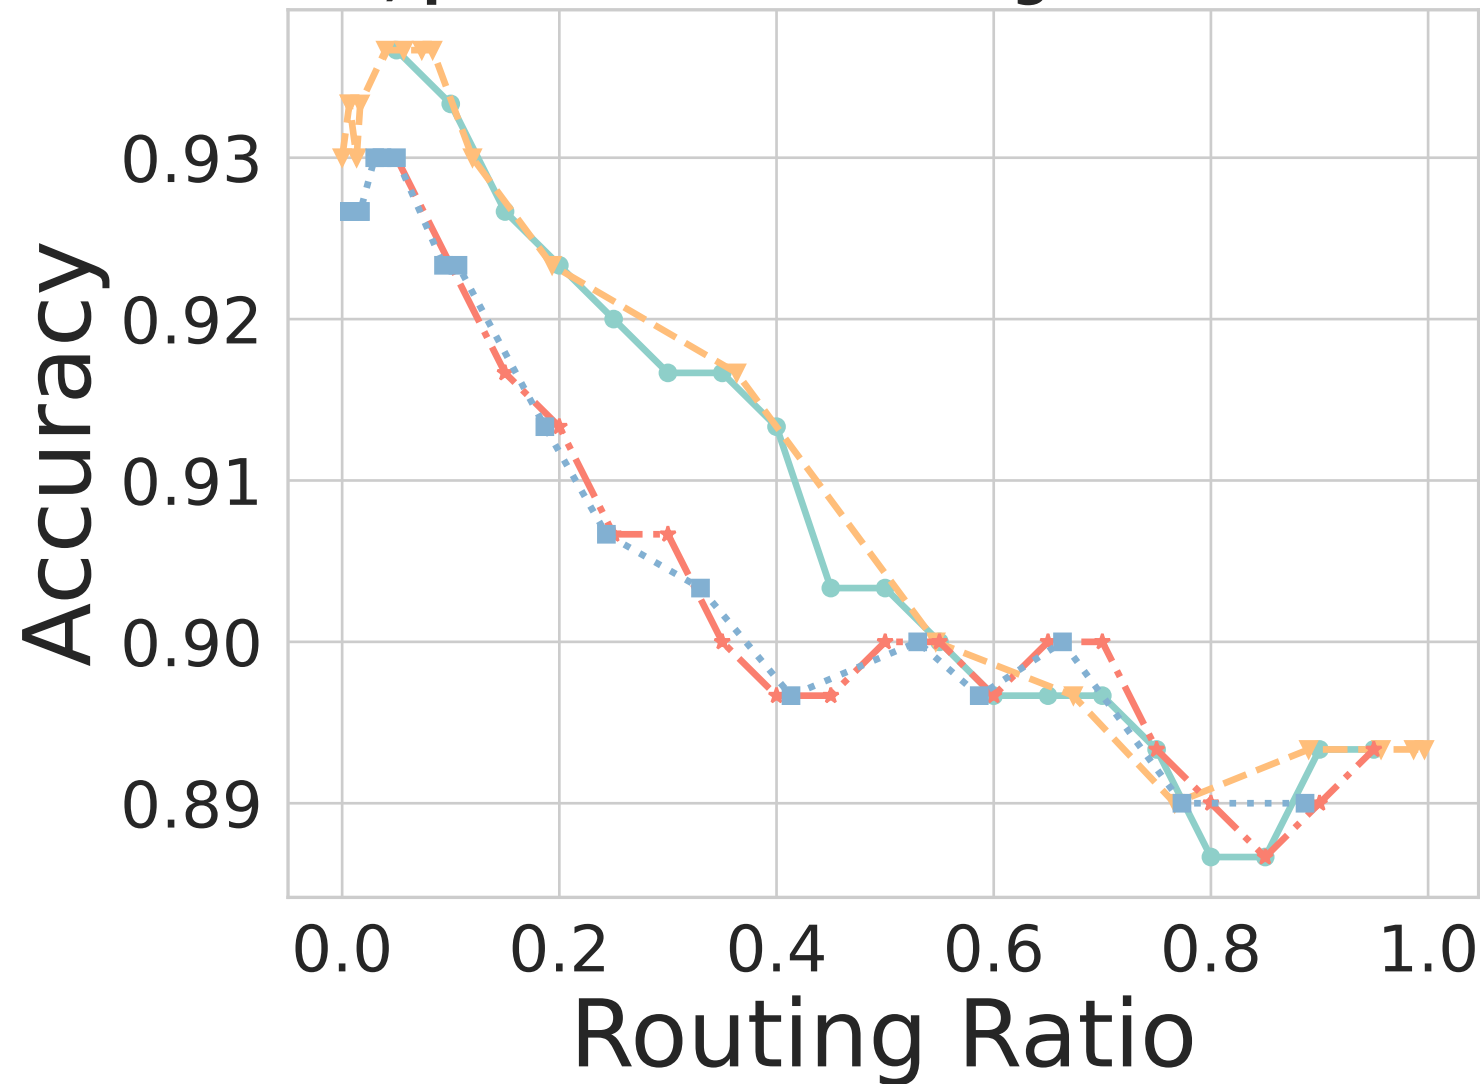

Supplement: supplementary_material [file cali_down_svamp_phi-4-mini-reasoning_meta-llama_Llama-3.1-70B-Instruct.pdf › Routing_SLM_LLMs/Proxy_routing_prediction/to_meta-llama_Llama-3.1-70B-Instruct/svamp_as_downstream/cali_down_svamp_phi-4-mini-reasoning_meta-llama_Llama-3.1-70B-Instruct.pdf]

**SVAMP, qwen-2.5-7b to Llama-3.1-70B**

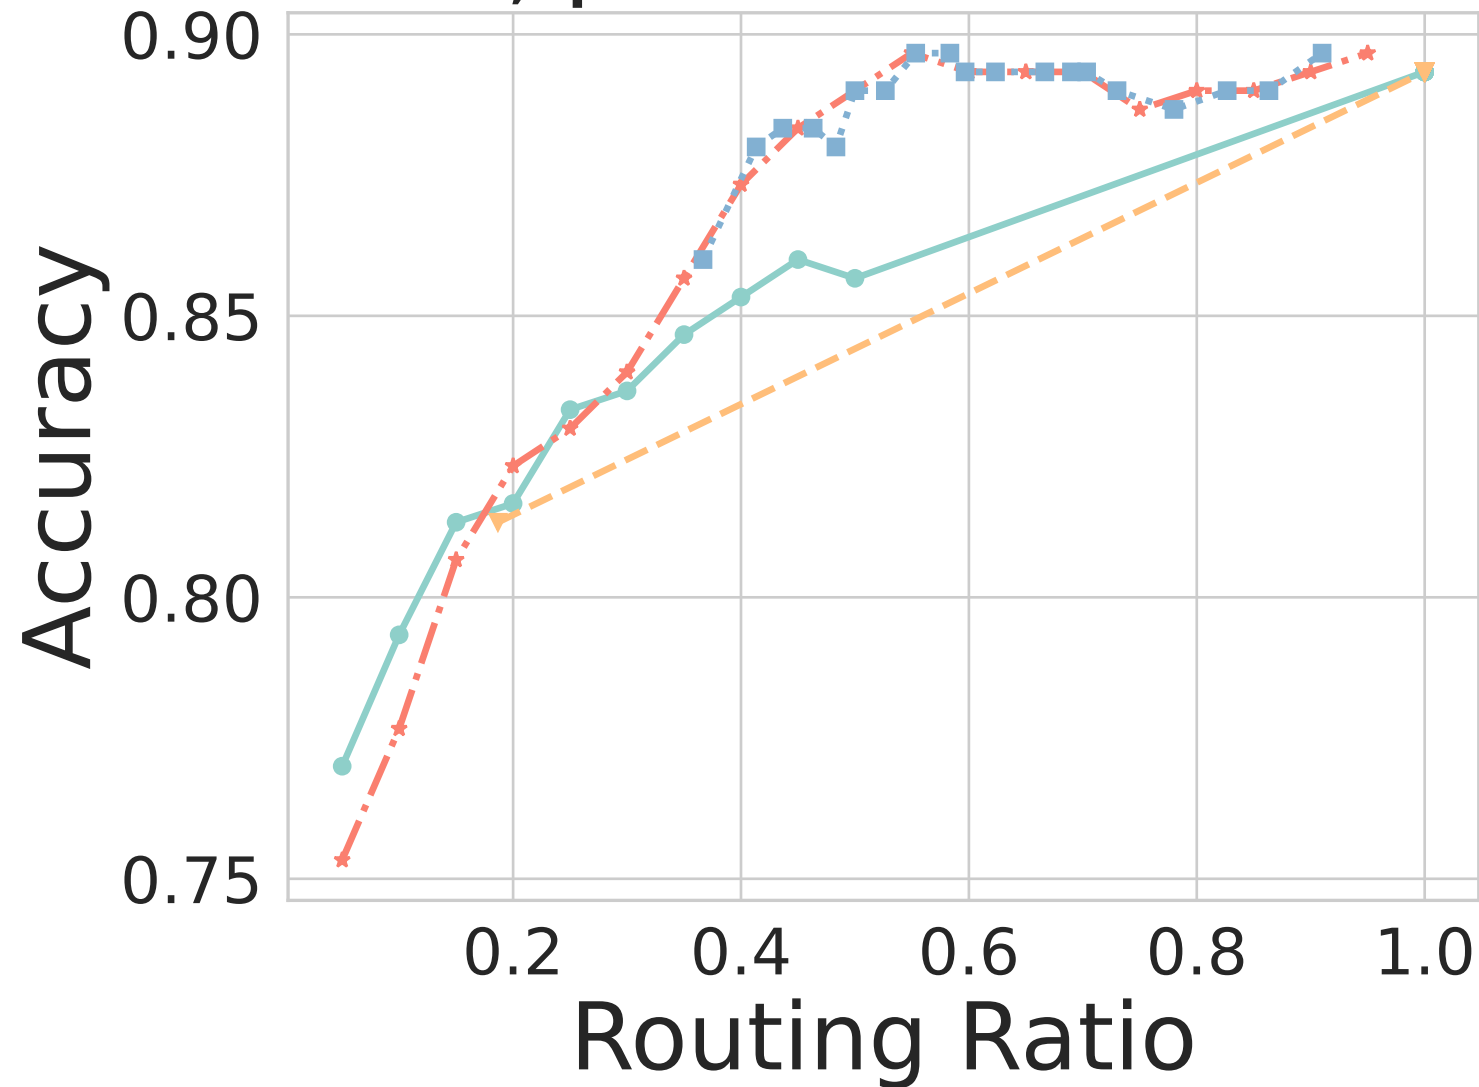

Supplement: supplementary_material [file cali_down_svamp_qwen-2.5-7b_meta-llama_Llama-3.1-70B-Instruct.pdf › Routing_SLM_LLMs/Proxy_routing_prediction/to_meta-llama_Llama-3.1-70B-Instruct/svamp_as_downstream/cali_down_svamp_qwen-2.5-7b_meta-llama_Llama-3.1-70B-Instruct.pdf]

**SVAMP, rwkv to Llama-3.1-70B**

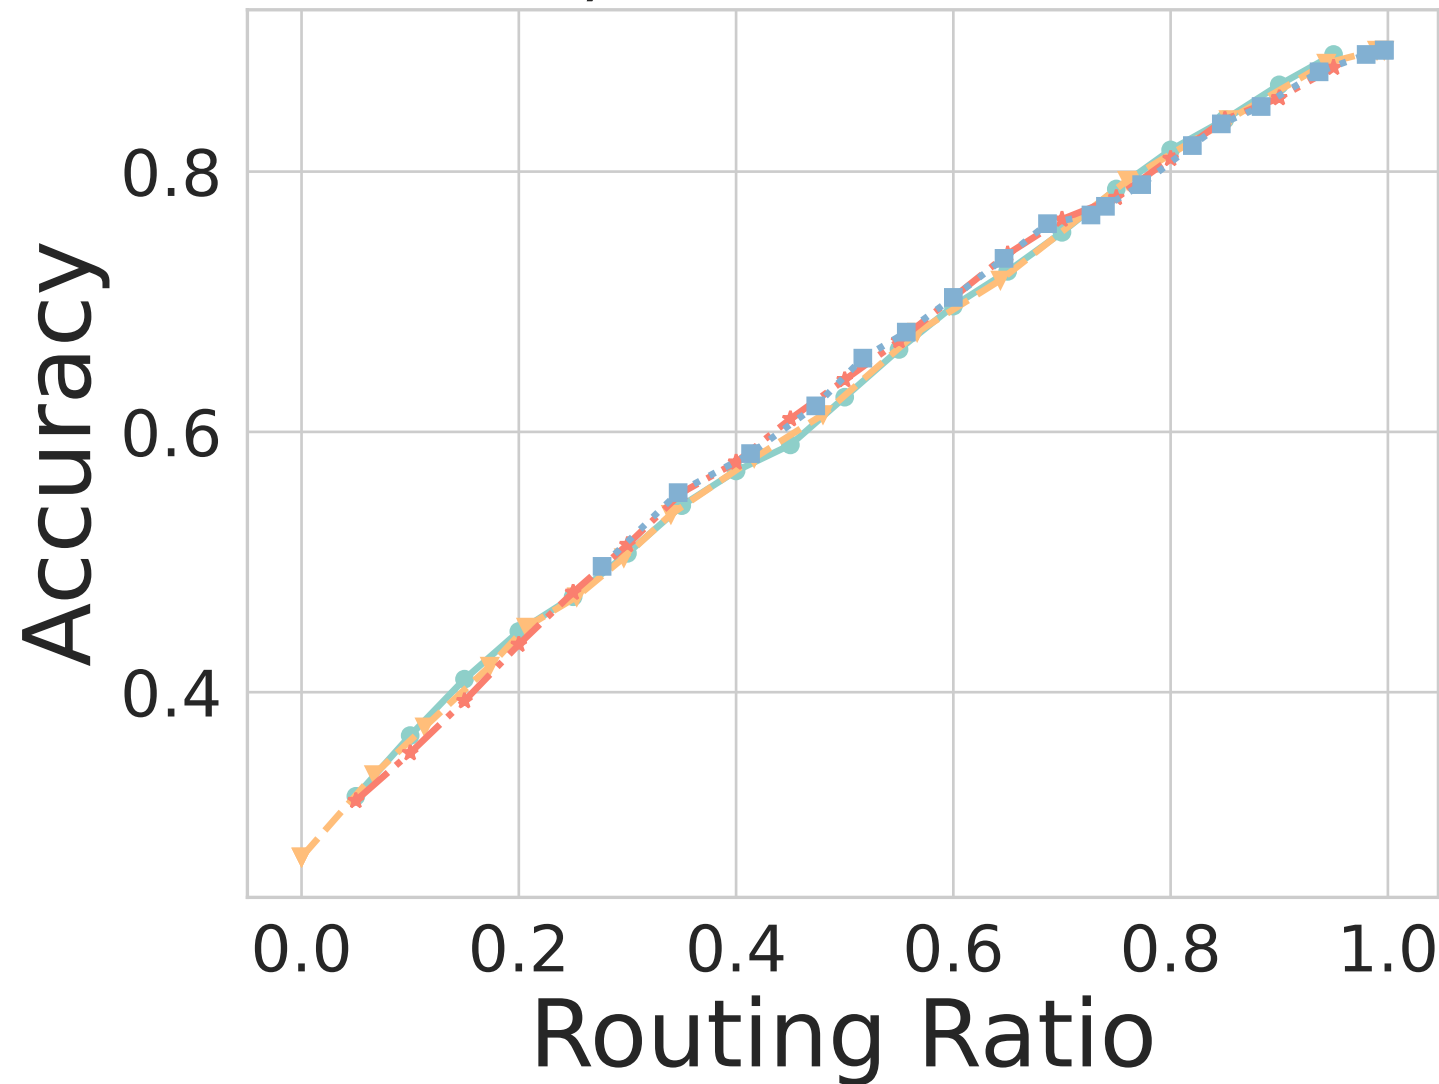

Supplement: supplementary_material [file cali_down_svamp_rwkv_meta-llama_Llama-3.1-70B-Instruct.pdf › Routing_SLM_LLMs/Proxy_routing_prediction/to_meta-llama_Llama-3.1-70B-Instruct/svamp_as_downstream/cali_down_svamp_rwkv_meta-llama_Llama-3.1-70B-Instruct.pdf]

**TruthfulQA, Qwen3-0.6B to Llama-3.1-70B**

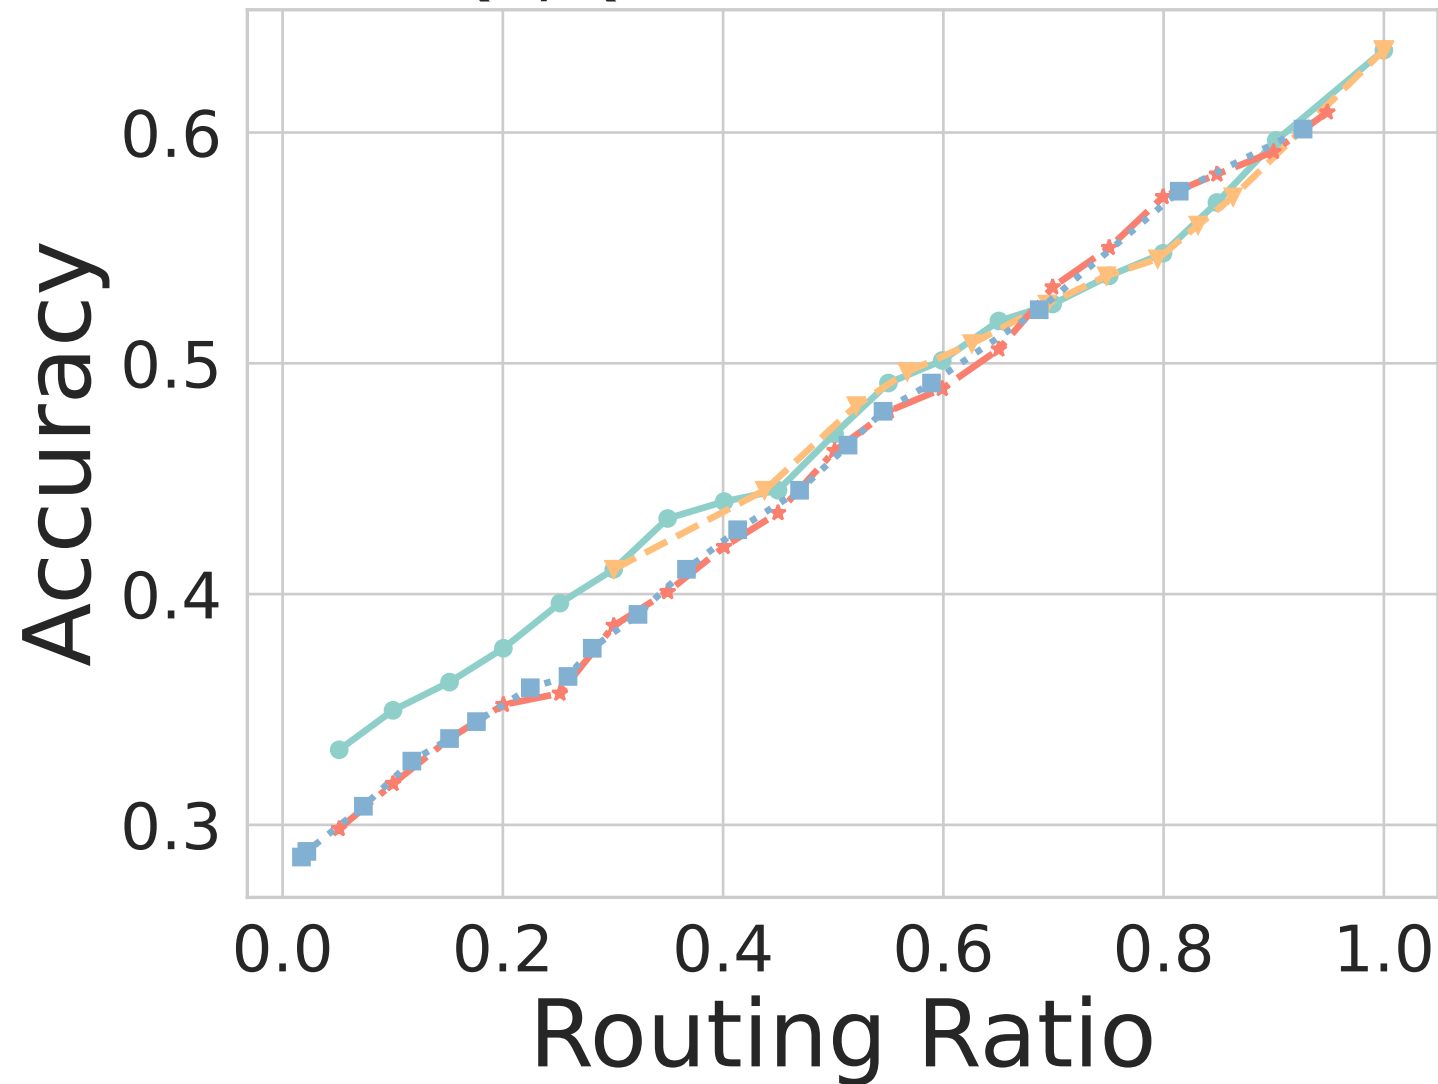

Supplement: supplementary_material [file cali_down_truthful_qa_Qwen3-0.6B_meta-llama_Llama-3.1-70B-Instruct.pdf › Routing_SLM_LLMs/Proxy_routing_prediction/to_meta-llama_Llama-3.1-70B-Instruct/truthful_qa_as_downstream/cali_down_truthful_qa_Qwen3-0.6B_meta-llama_Llama-3.1-70B-Instruct.pdf]

**TruthfulQA, Qwen3-1.7B to Llama-3.1-70B**

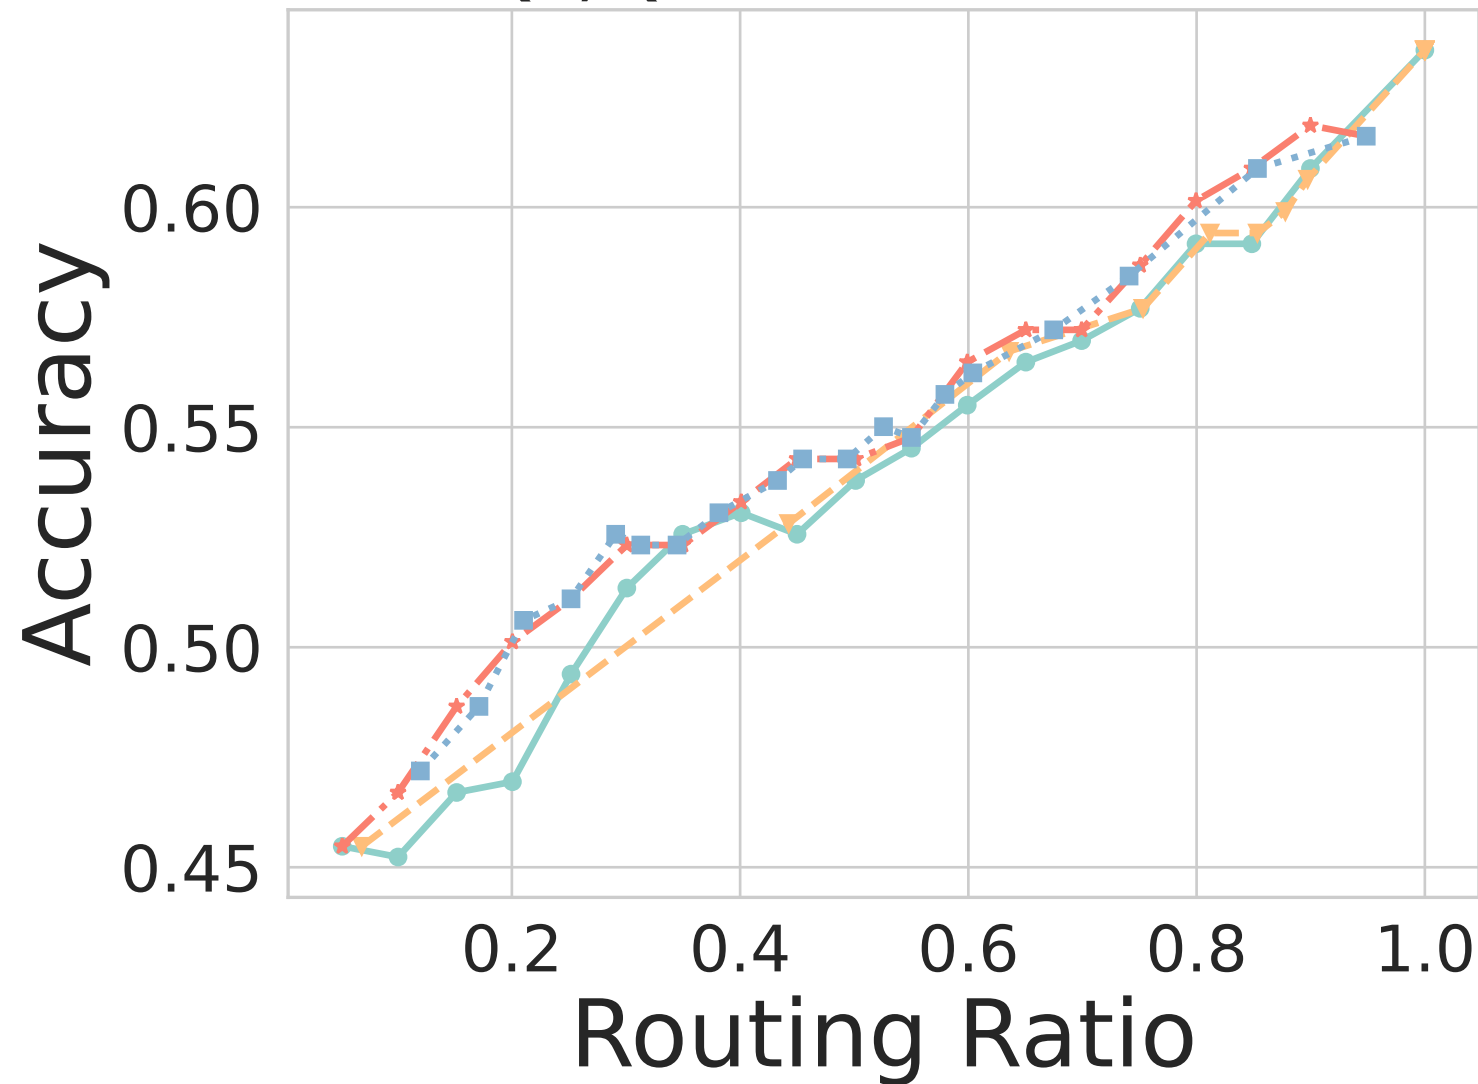

Supplement: supplementary_material [file cali_down_truthful_qa_Qwen3-1.7B_meta-llama_Llama-3.1-70B-Instruct.pdf › Routing_SLM_LLMs/Proxy_routing_prediction/to_meta-llama_Llama-3.1-70B-Instruct/truthful_qa_as_downstream/cali_down_truthful_qa_Qwen3-1.7B_meta-llama_Llama-3.1-70B-Instruct.pdf]

**TruthfulQA, Qwen3-4B to Llama-3.1-70B**

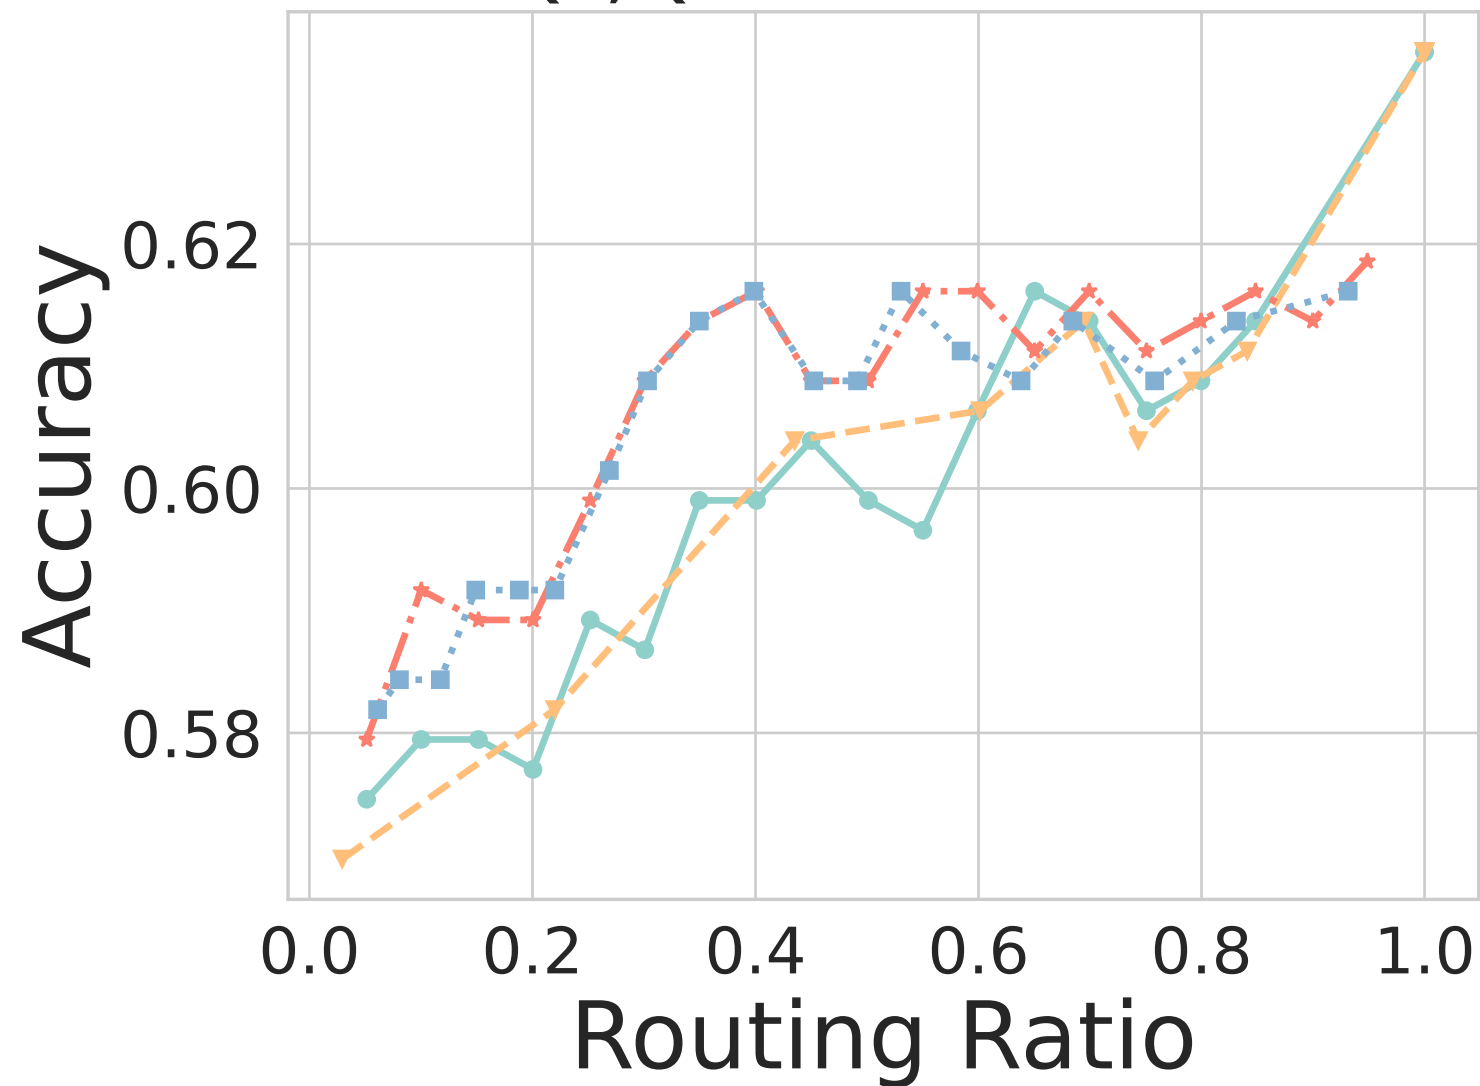

Supplement: supplementary_material [file cali_down_truthful_qa_Qwen3-4B_meta-llama_Llama-3.1-70B-Instruct.pdf › Routing_SLM_LLMs/Proxy_routing_prediction/to_meta-llama_Llama-3.1-70B-Instruct/truthful_qa_as_downstream/cali_down_truthful_qa_Qwen3-4B_meta-llama_Llama-3.1-70B-Instruct.pdf]

# TruthfulQA, granite-3.1-8b to Llama-3.1-70B

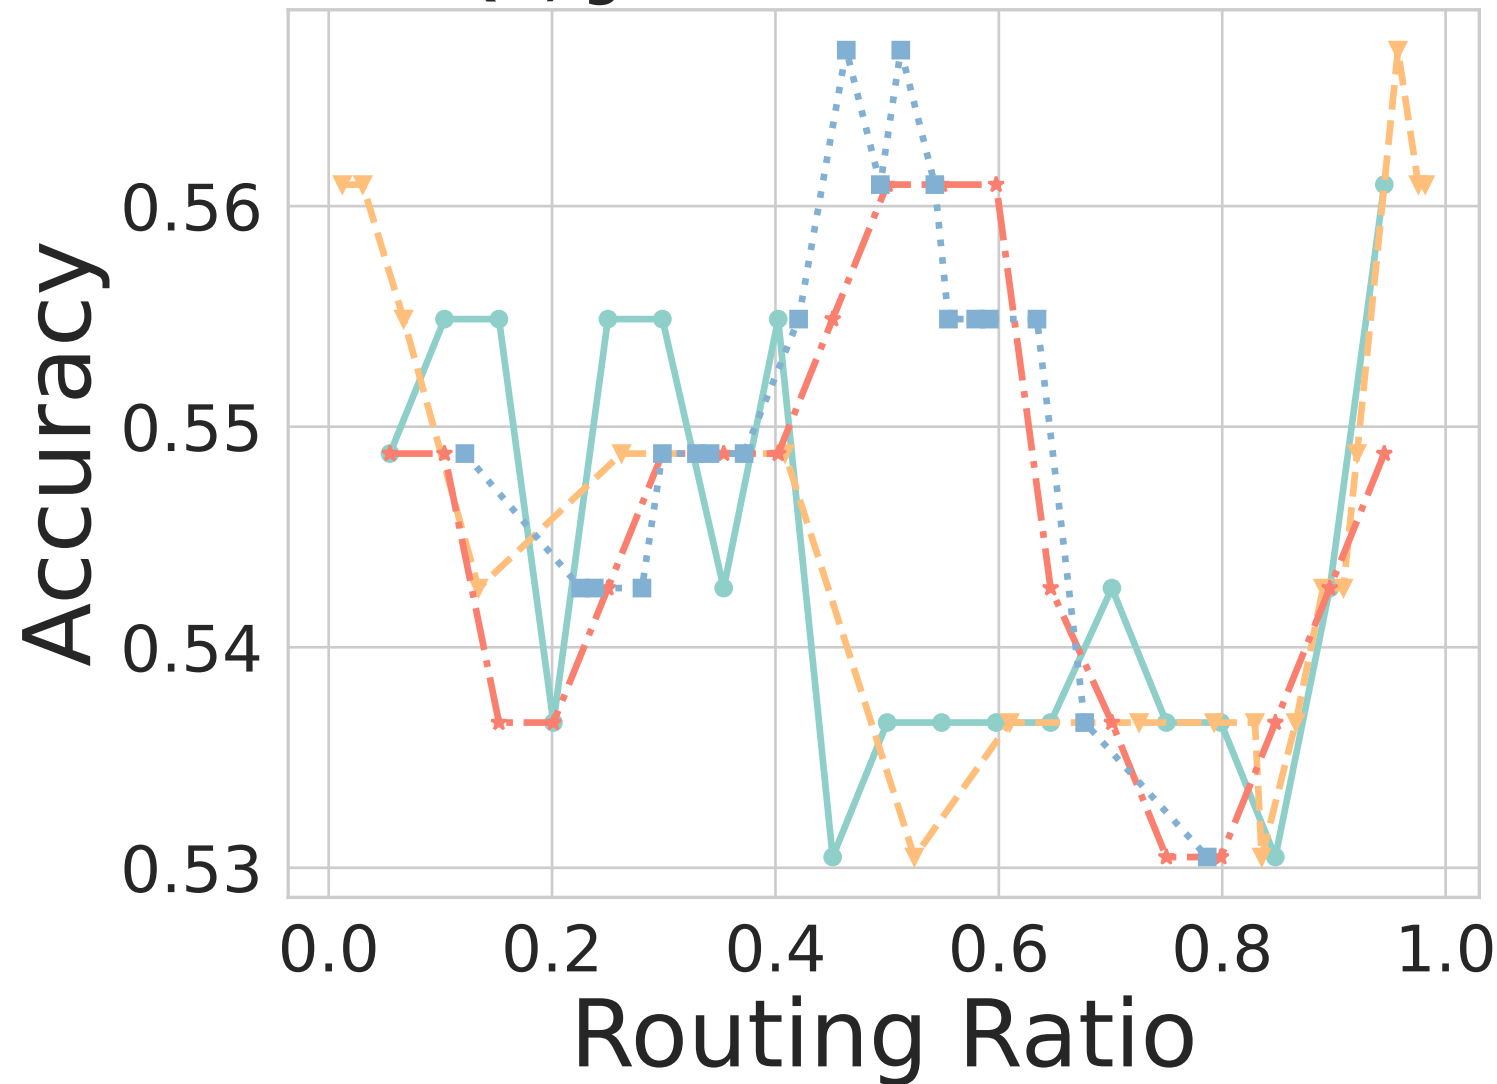

Supplement: supplementary_material [file cali_down_truthful_qa_granite-3.1-8b_meta-llama_Llama-3.1-70B-Instruct.pdf › Routing_SLM_LLMs/Proxy_routing_prediction/to_meta-llama_Llama-3.1-70B-Instruct/truthful_qa_as_downstream/cali_down_truthful_qa_granite-3.1-8b_meta-llama_Llama-3.1-70B-Instruct.pdf]
