# Supplementary material (part 2 of 14)
Source: ML conference proceedings conference paper supplement (https://openreview.net/forum?id=smdbra3VEi)

**MultiArith, llama-3.1-8b to Qwen3-32B**

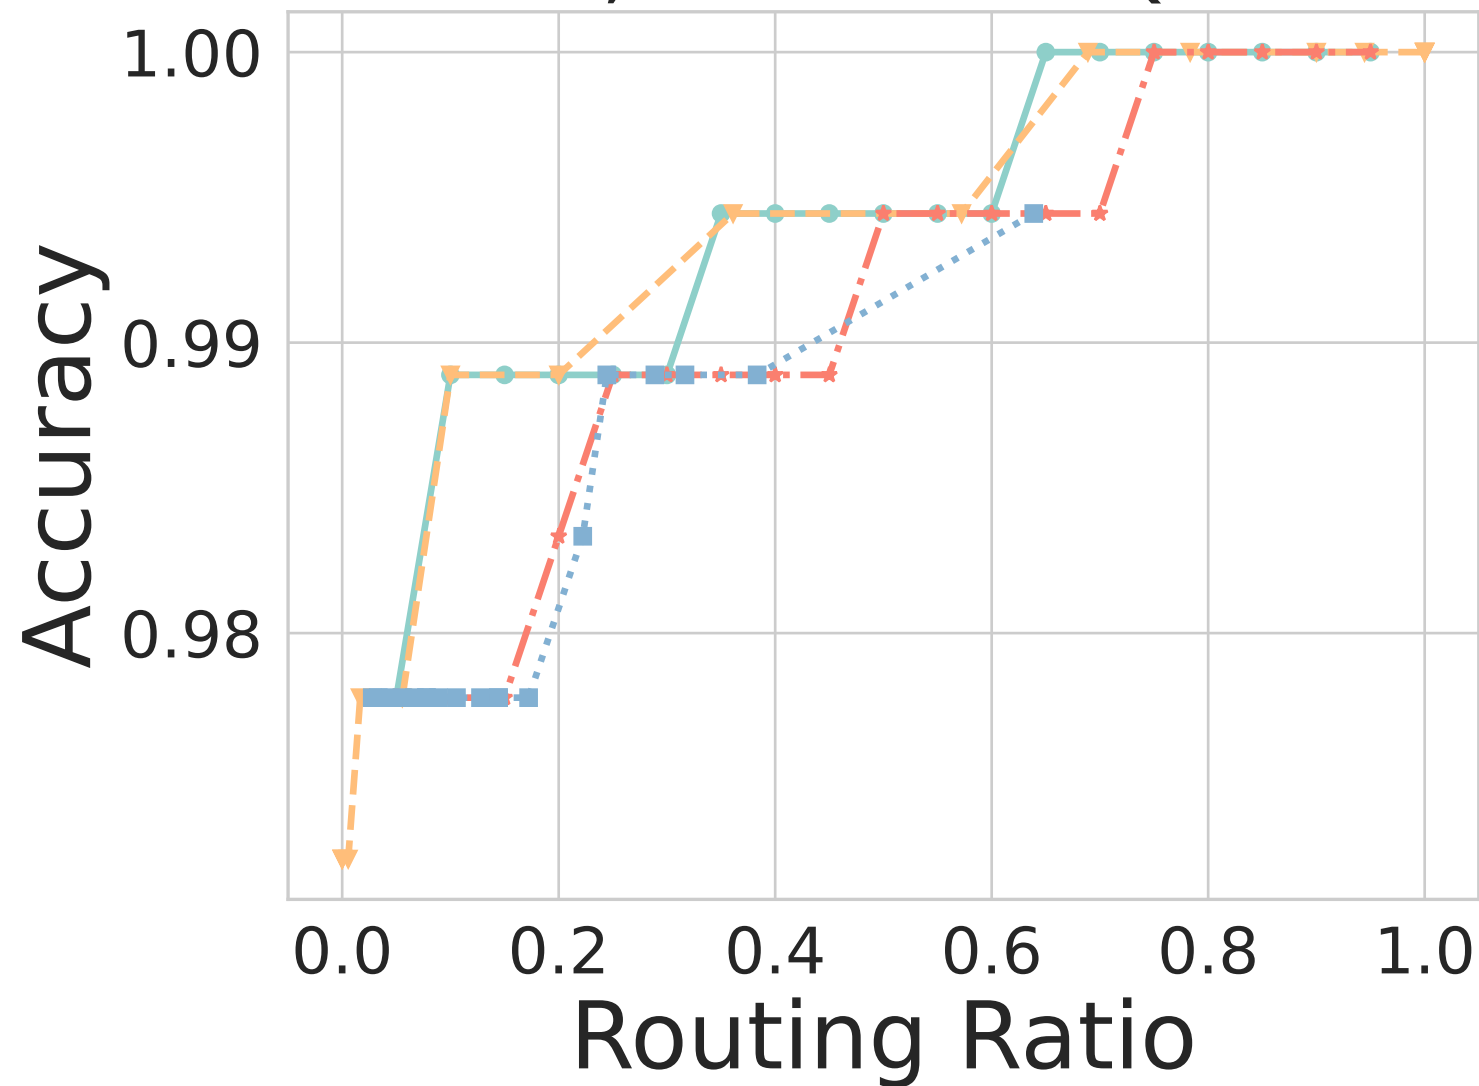

Supplement: supplementary_material [file cali_down_multiarith_llama-3.1-8b_Qwen_Qwen3-32B.pdf › Routing_SLM_LLMs/Proxy_routing_prediction/to_Qwen_Qwen3-32B/multiarith_as_downstream/cali_down_multiarith_llama-3.1-8b_Qwen_Qwen3-32B.pdf]

**MultiArith, llama-3.2-1b to Qwen3-32B**

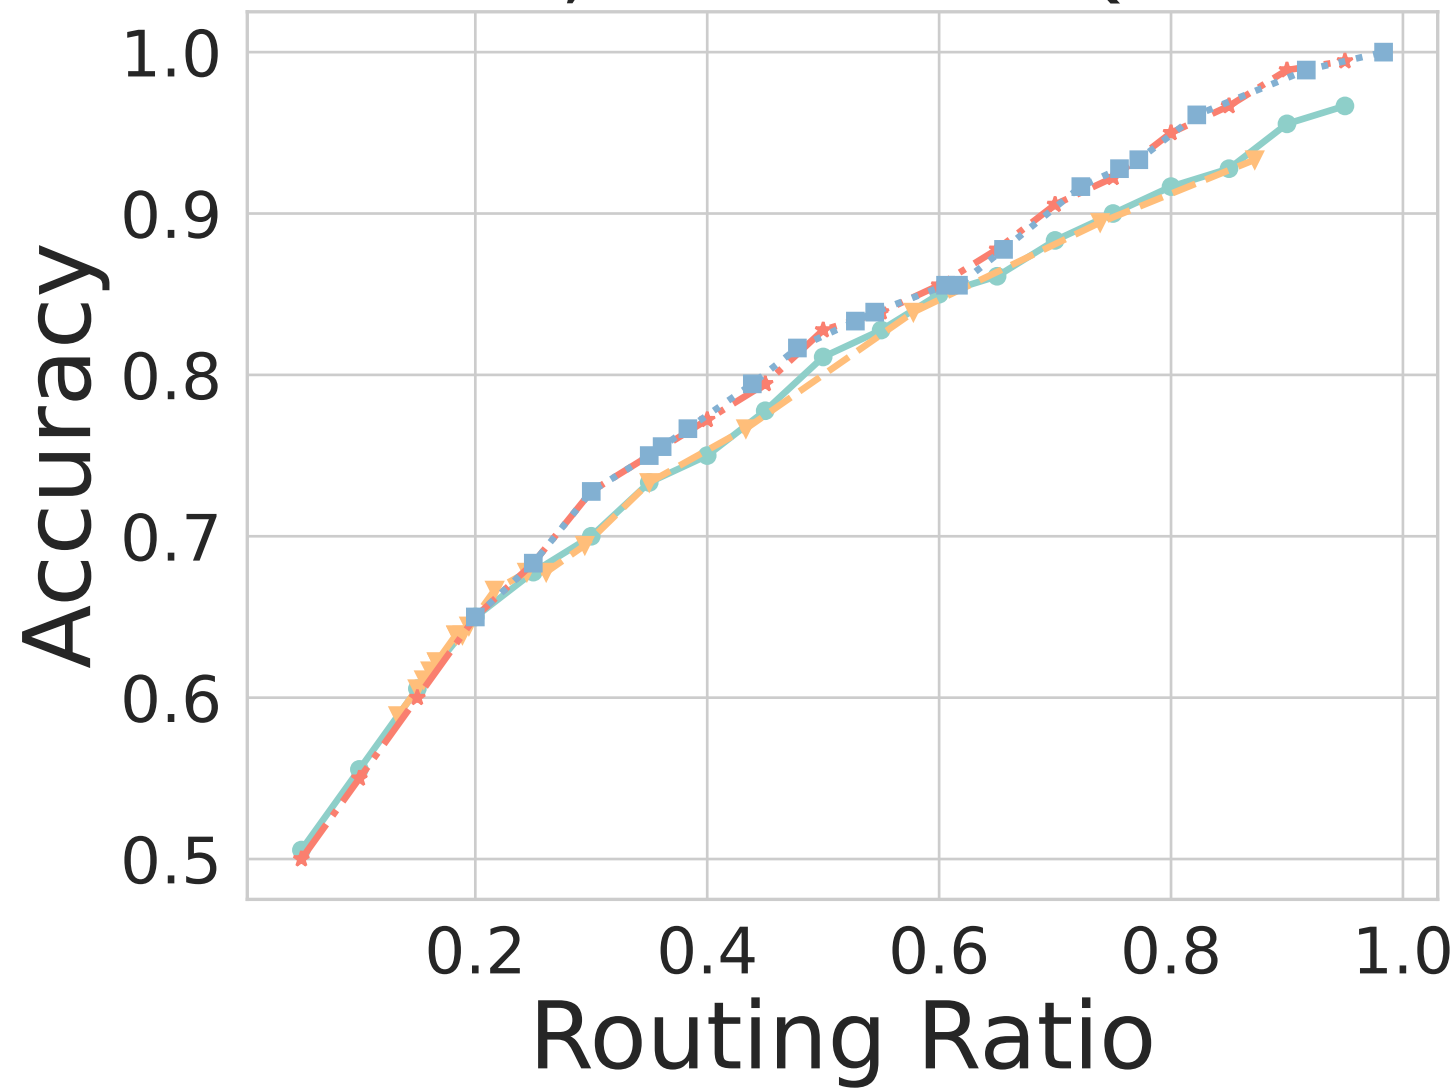

Supplement: supplementary_material [file cali_down_multiarith_llama-3.2-1b_Qwen_Qwen3-32B.pdf › Routing_SLM_LLMs/Proxy_routing_prediction/to_Qwen_Qwen3-32B/multiarith_as_downstream/cali_down_multiarith_llama-3.2-1b_Qwen_Qwen3-32B.pdf]

**MultiArith, llama-3.2-3b to Qwen3-32B**

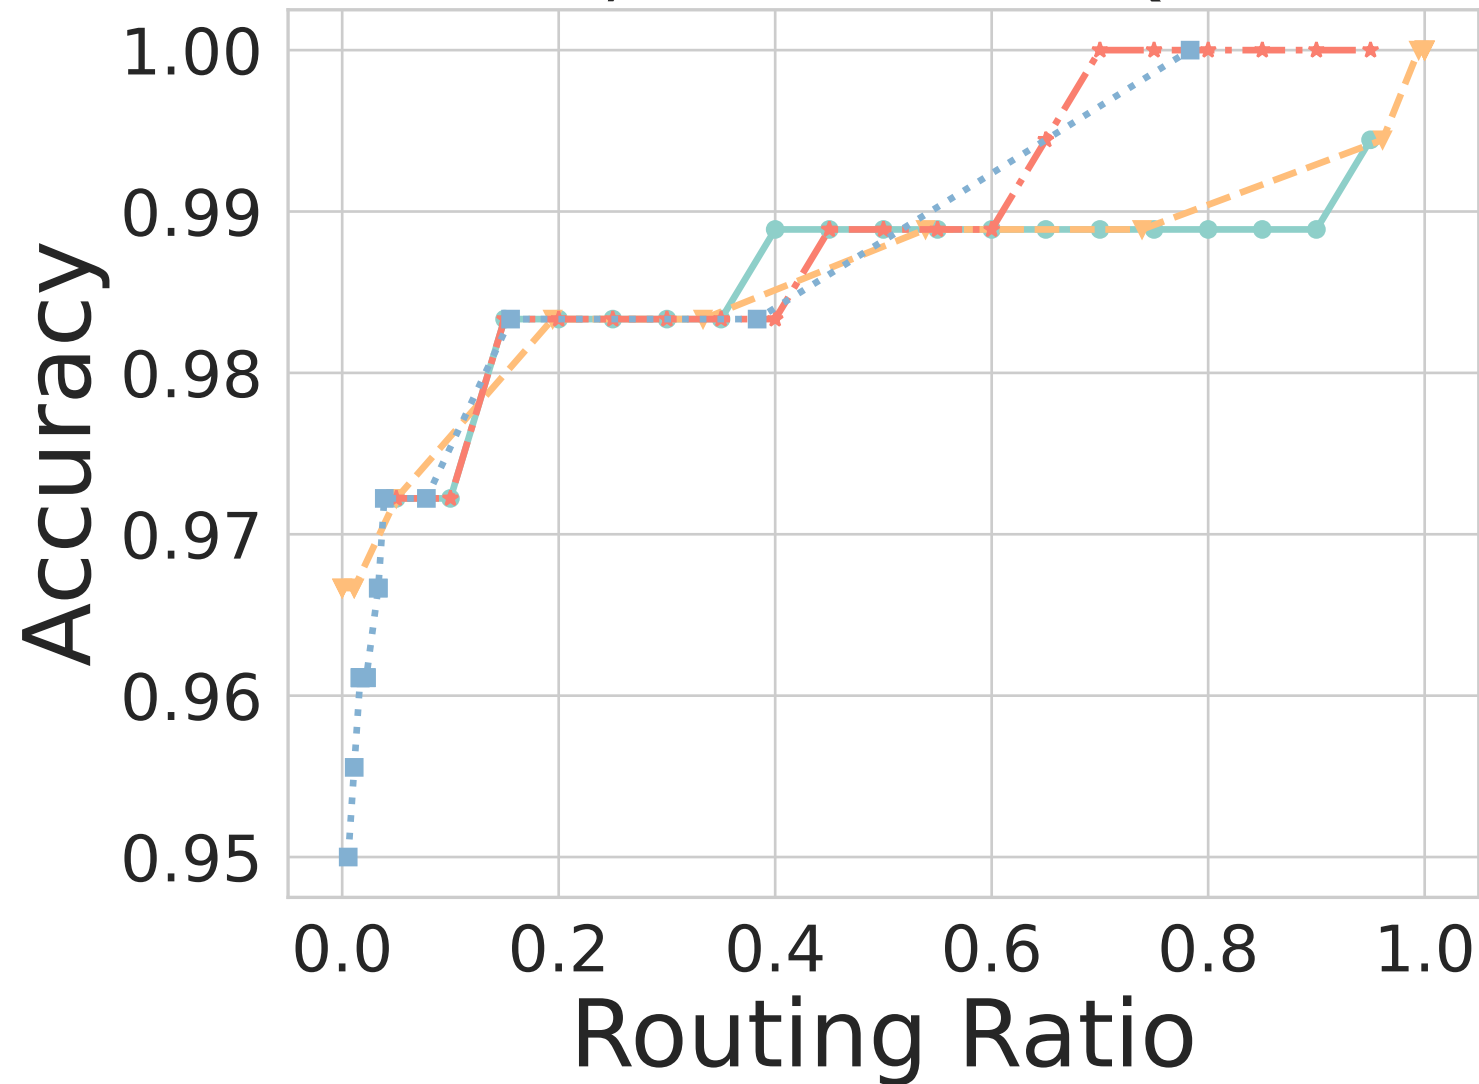

Supplement: supplementary_material [file cali_down_multiarith_llama-3.2-3b_Qwen_Qwen3-32B.pdf › Routing_SLM_LLMs/Proxy_routing_prediction/to_Qwen_Qwen3-32B/multiarith_as_downstream/cali_down_multiarith_llama-3.2-3b_Qwen_Qwen3-32B.pdf]

**MultiArith, mistral-7b to Qwen3-32B**

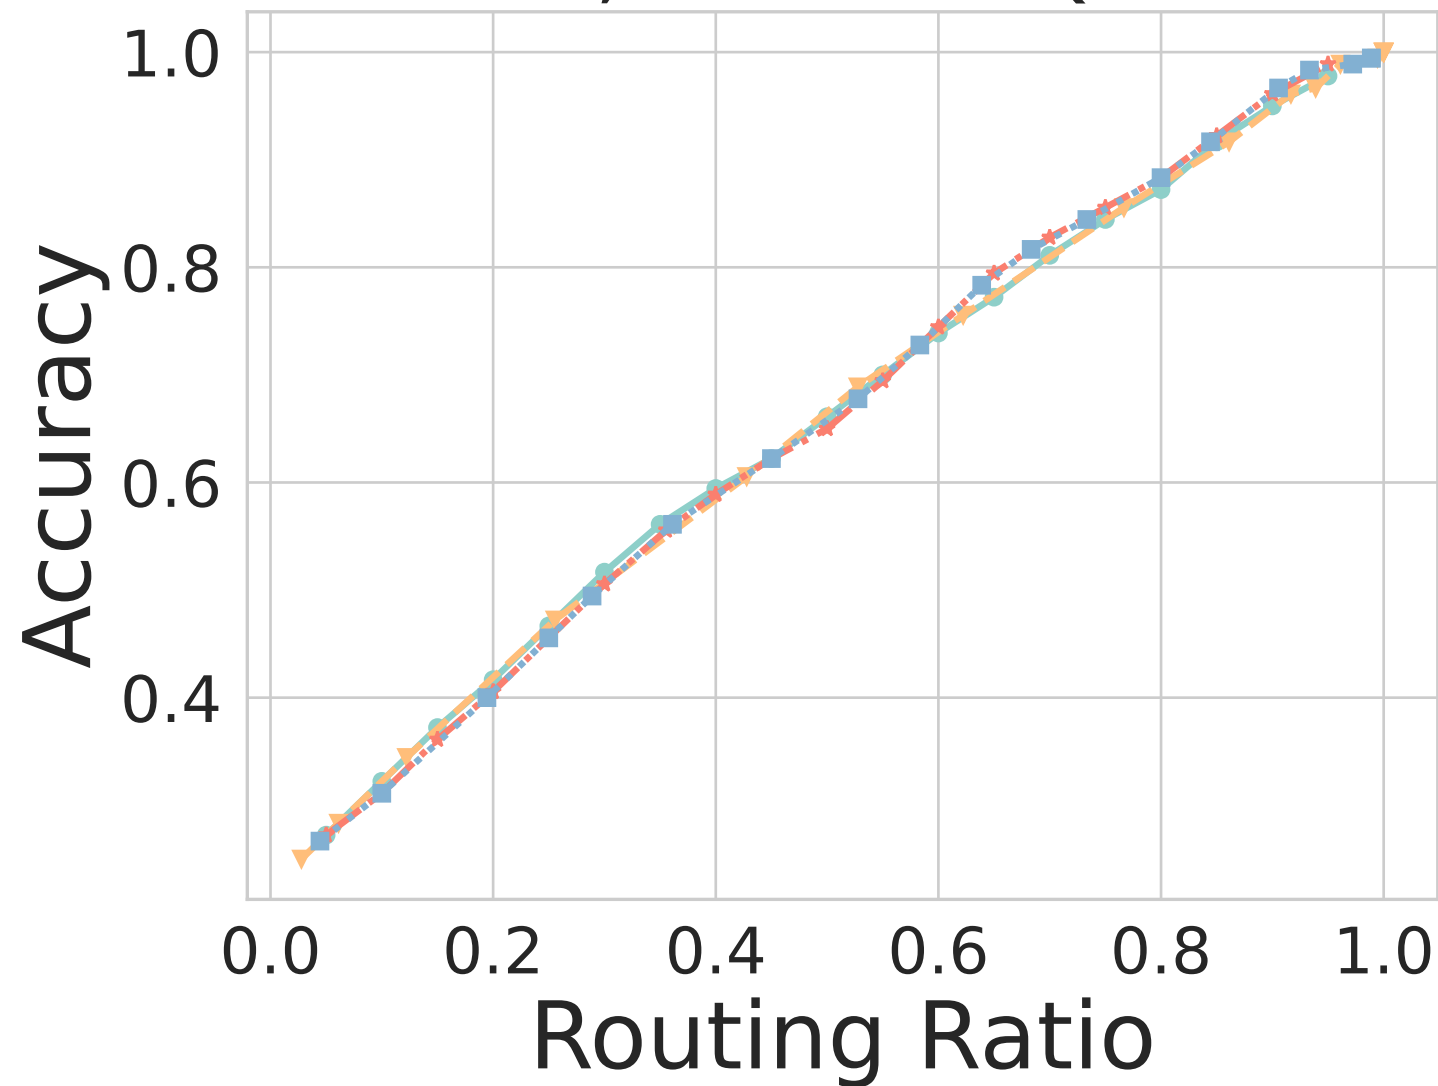

Supplement: supplementary_material [file cali_down_multiarith_mistral-7b_Qwen_Qwen3-32B.pdf › Routing_SLM_LLMs/Proxy_routing_prediction/to_Qwen_Qwen3-32B/multiarith_as_downstream/cali_down_multiarith_mistral-7b_Qwen_Qwen3-32B.pdf]

**MultiArith, phi-3.5-mini to Qwen3-32B**

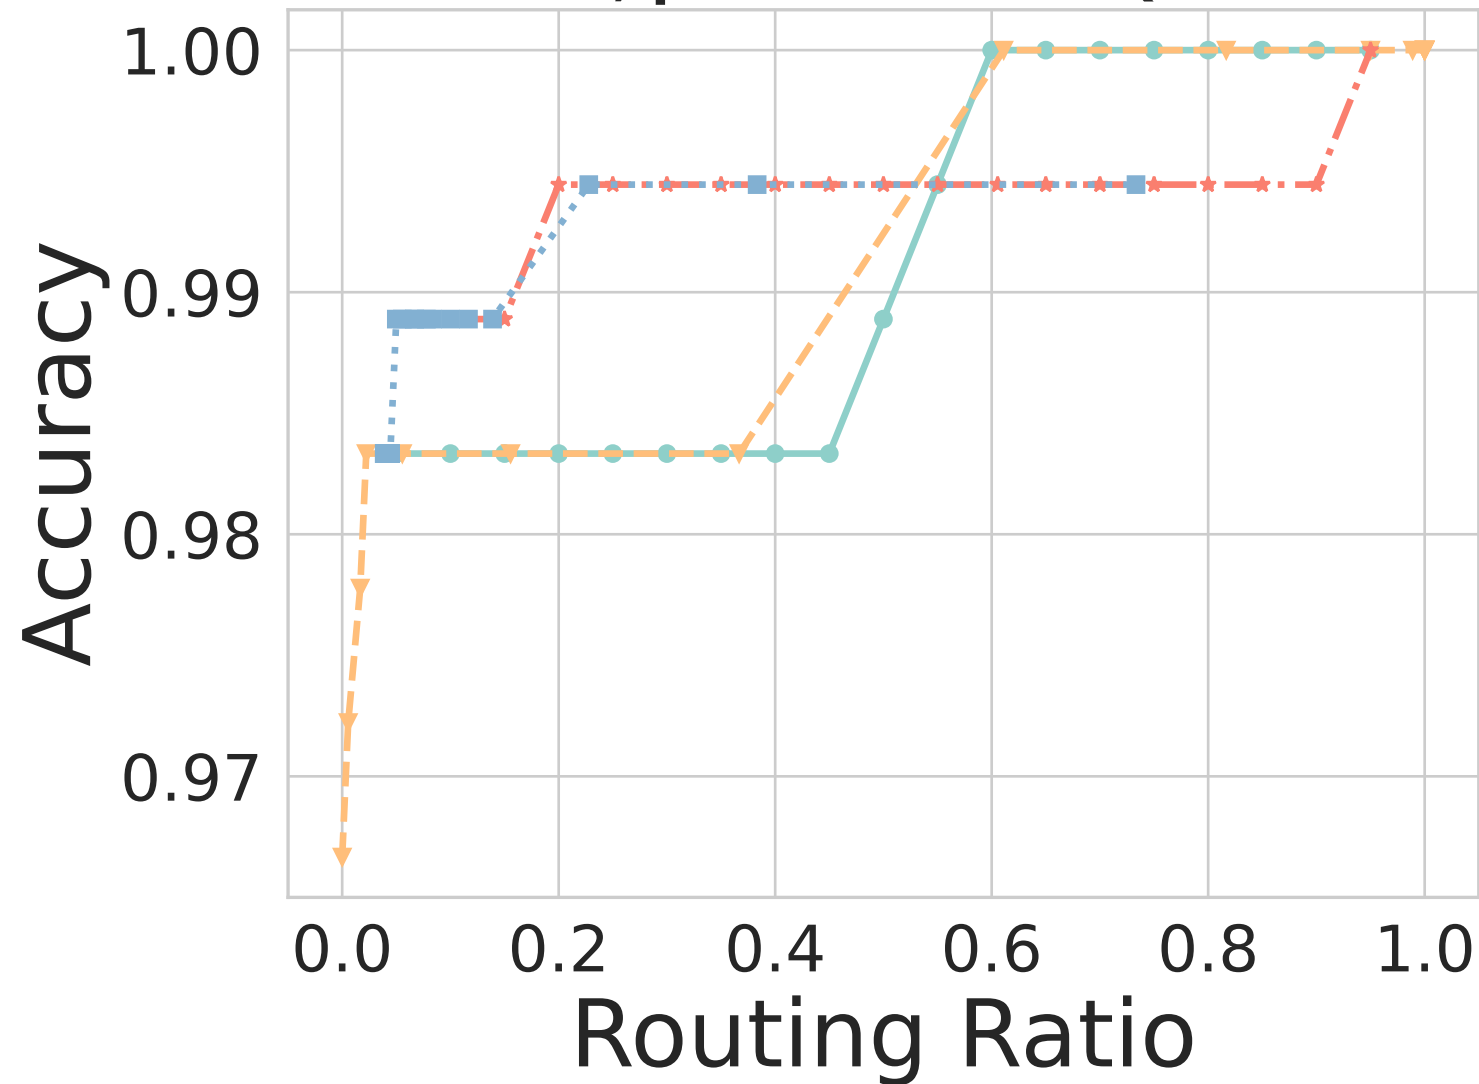

Supplement: supplementary_material [file cali_down_multiarith_phi-3.5-mini_Qwen_Qwen3-32B.pdf › Routing_SLM_LLMs/Proxy_routing_prediction/to_Qwen_Qwen3-32B/multiarith_as_downstream/cali_down_multiarith_phi-3.5-mini_Qwen_Qwen3-32B.pdf]

**MultiArith, phi-4-mini-reasoning to Qwen3-32B**

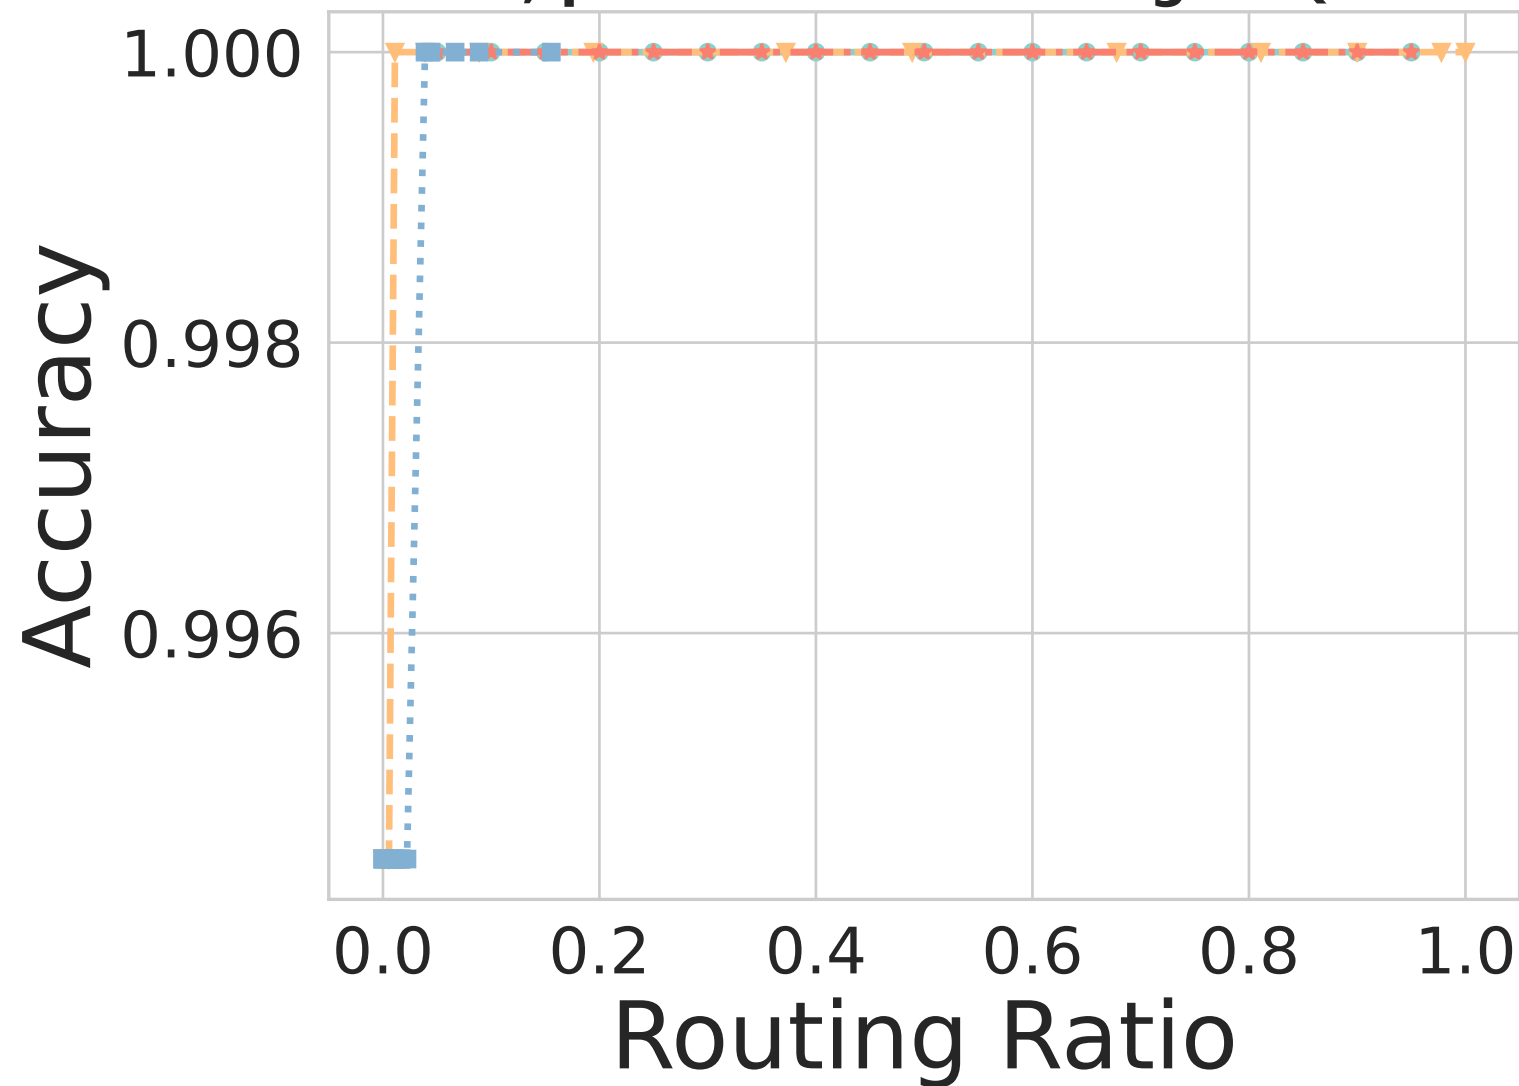

Supplement: supplementary_material [file cali_down_multiarith_phi-4-mini-reasoning_Qwen_Qwen3-32B.pdf › Routing_SLM_LLMs/Proxy_routing_prediction/to_Qwen_Qwen3-32B/multiarith_as_downstream/cali_down_multiarith_phi-4-mini-reasoning_Qwen_Qwen3-32B.pdf]

**MultiArith, qwen-2.5-7b to Qwen3-32B**

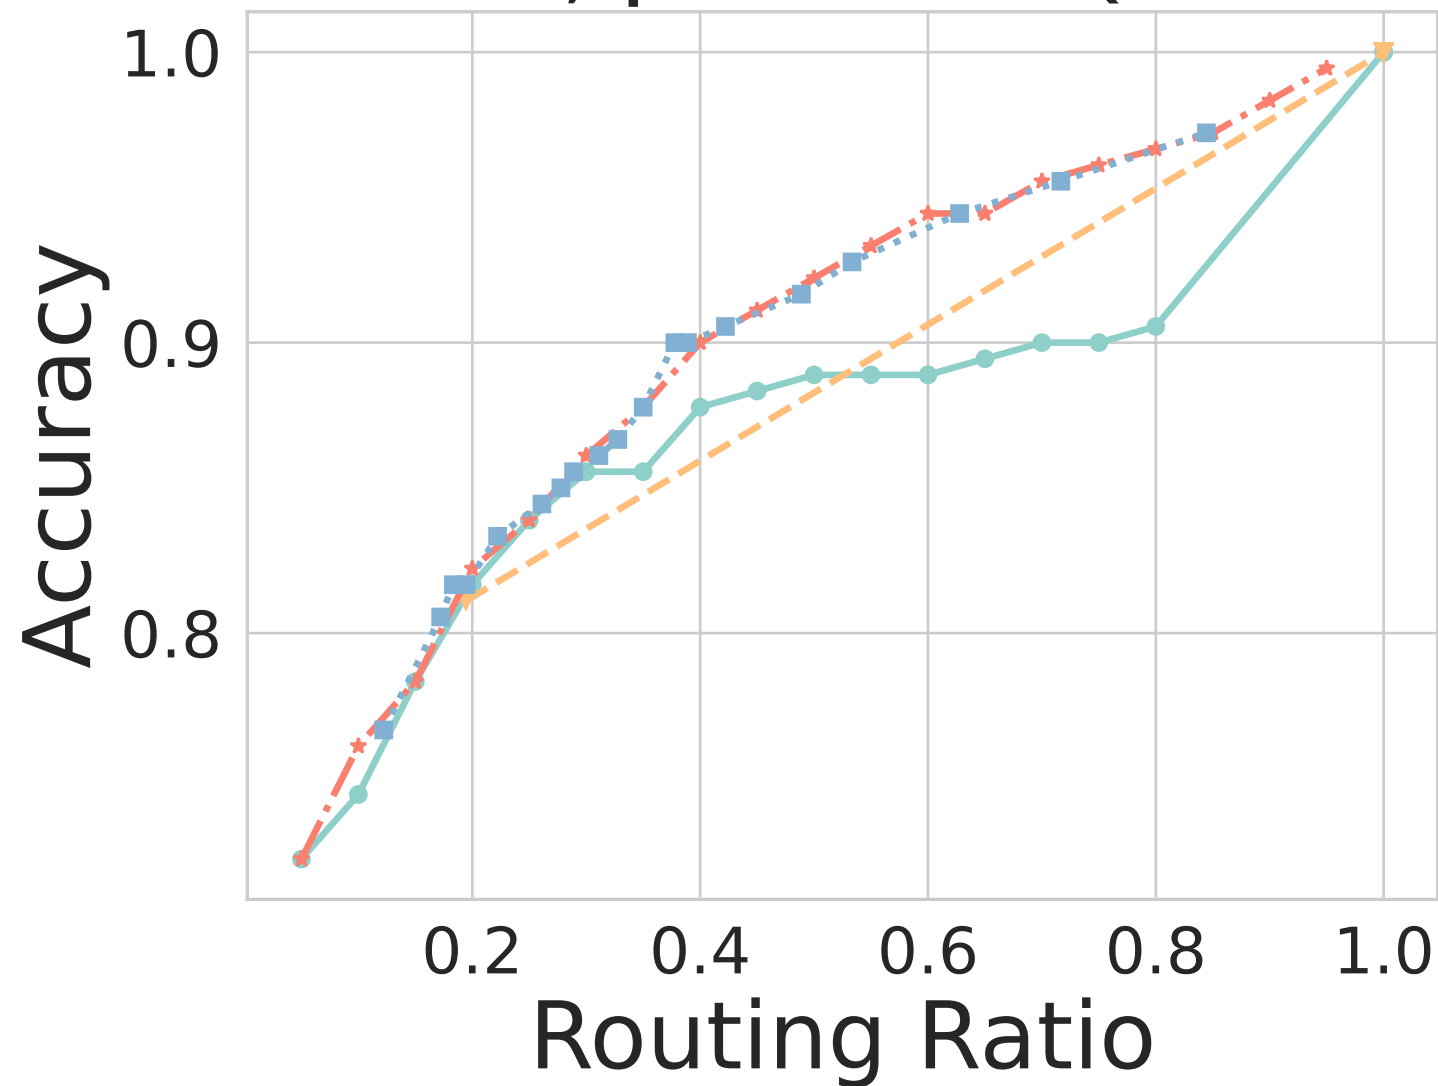

Supplement: supplementary_material [file cali_down_multiarith_qwen-2.5-7b_Qwen_Qwen3-32B.pdf › Routing_SLM_LLMs/Proxy_routing_prediction/to_Qwen_Qwen3-32B/multiarith_as_downstream/cali_down_multiarith_qwen-2.5-7b_Qwen_Qwen3-32B.pdf]

**MultiArith, rwkv to Qwen3-32B**

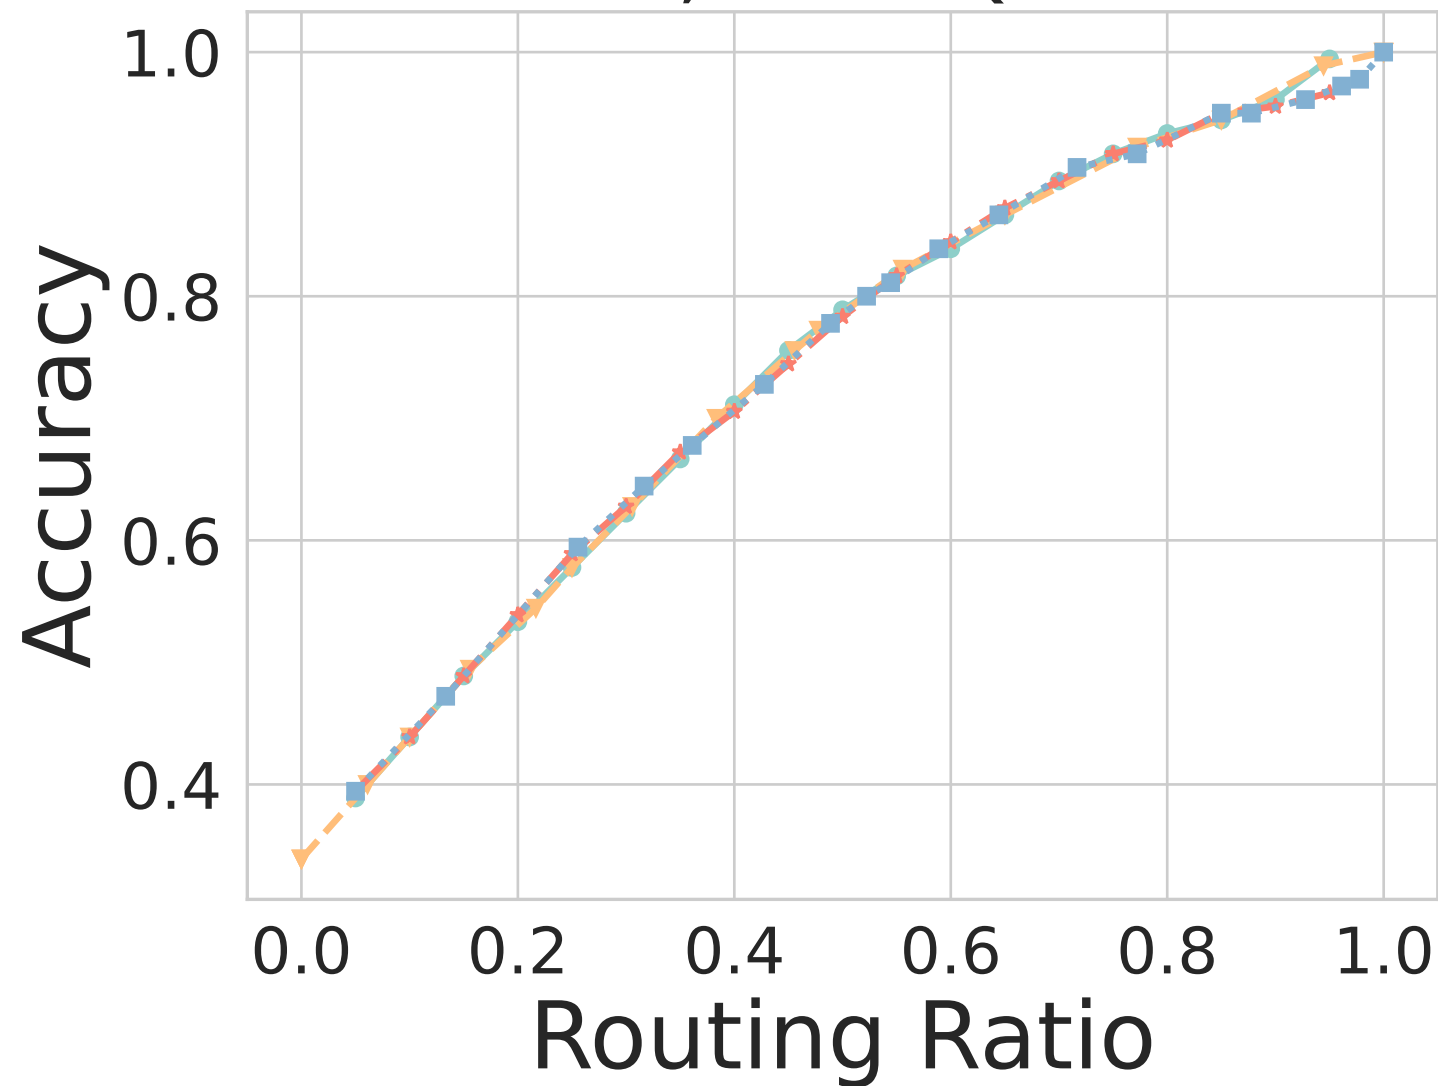

Supplement: supplementary_material [file cali_down_multiarith_rwkv_Qwen_Qwen3-32B.pdf › Routing_SLM_LLMs/Proxy_routing_prediction/to_Qwen_Qwen3-32B/multiarith_as_downstream/cali_down_multiarith_rwkv_Qwen_Qwen3-32B.pdf]

OpenBookQA, Qwen3-0.6B to Qwen3-32B

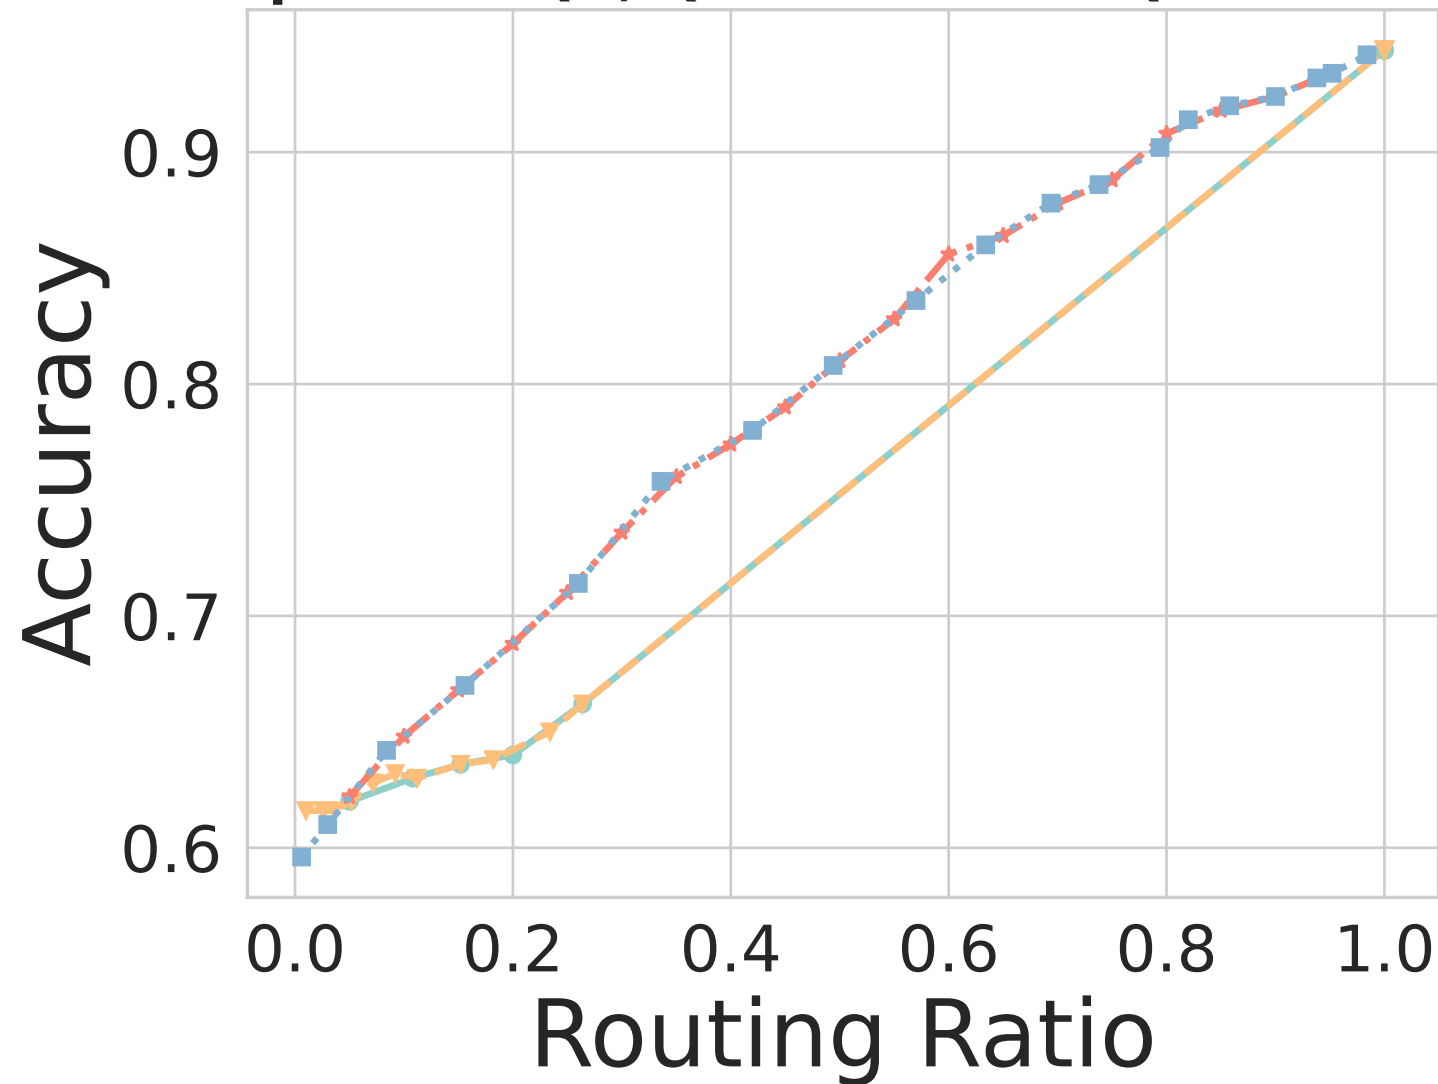

Supplement: supplementary_material [file cali_down_openbook_qa_Qwen3-0.6B_Qwen_Qwen3-32B.pdf › Routing_SLM_LLMs/Proxy_routing_prediction/to_Qwen_Qwen3-32B/openbook_qa_as_downstream/cali_down_openbook_qa_Qwen3-0.6B_Qwen_Qwen3-32B.pdf]

OpenBookQA, Qwen3-1.7B to Qwen3-32B

Accuracy

0.95

0.90

0.85

0.80

0.0

0.2

0.4

0.6

0.8

1.0

Routing Ratio

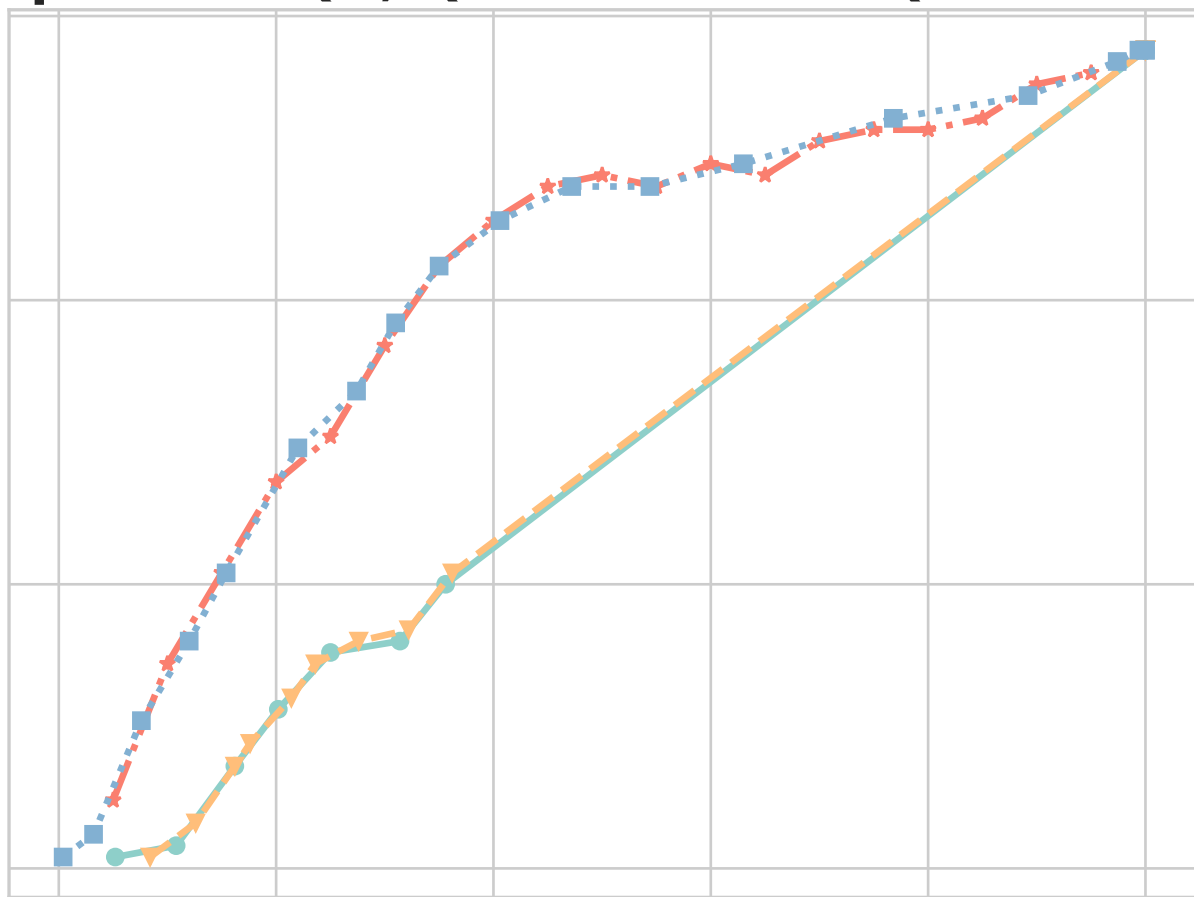

Supplement: supplementary_material [file cali_down_openbook_qa_Qwen3-1.7B_Qwen_Qwen3-32B.pdf › Routing_SLM_LLMs/Proxy_routing_prediction/to_Qwen_Qwen3-32B/openbook_qa_as_downstream/cali_down_openbook_qa_Qwen3-1.7B_Qwen_Qwen3-32B.pdf]

OpenBookQA, Qwen3-4B to Qwen3-32B

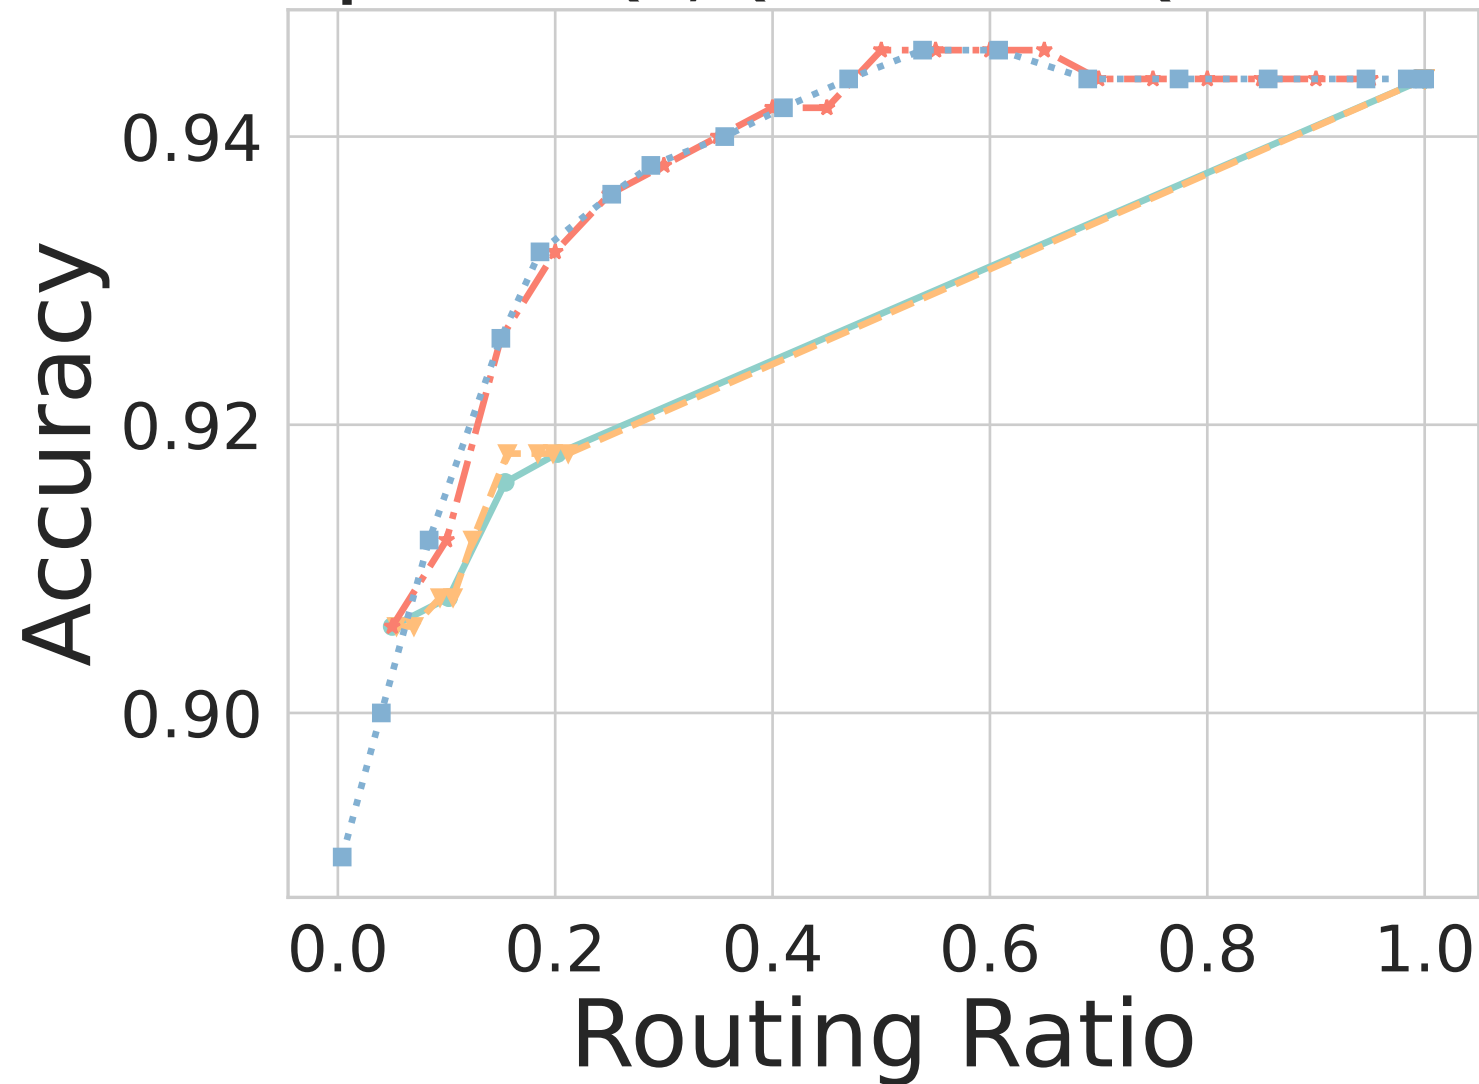

Supplement: supplementary_material [file cali_down_openbook_qa_Qwen3-4B_Qwen_Qwen3-32B.pdf › Routing_SLM_LLMs/Proxy_routing_prediction/to_Qwen_Qwen3-32B/openbook_qa_as_downstream/cali_down_openbook_qa_Qwen3-4B_Qwen_Qwen3-32B.pdf]

OpenBookQA, granite-3.1-8b to Qwen3-32B

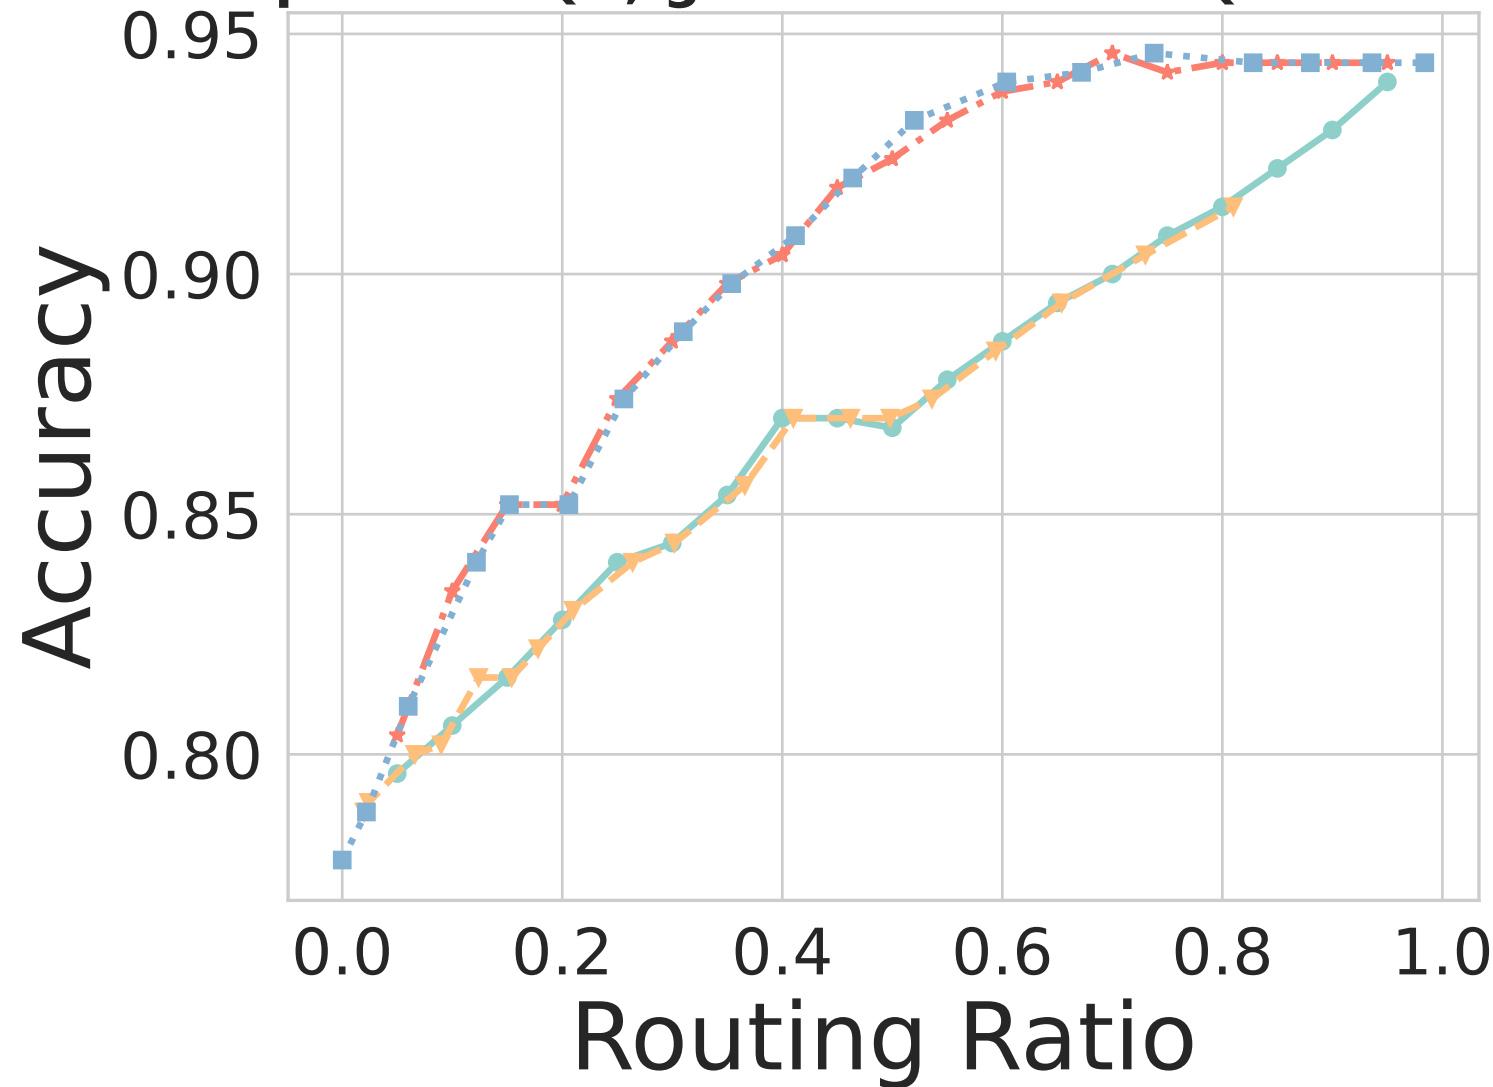

Supplement: supplementary_material [file cali_down_openbook_qa_granite-3.1-8b_Qwen_Qwen3-32B.pdf › Routing_SLM_LLMs/Proxy_routing_prediction/to_Qwen_Qwen3-32B/openbook_qa_as_downstream/cali_down_openbook_qa_granite-3.1-8b_Qwen_Qwen3-32B.pdf]

OpenBookQA, llama-3.1-8b to Qwen3-32B

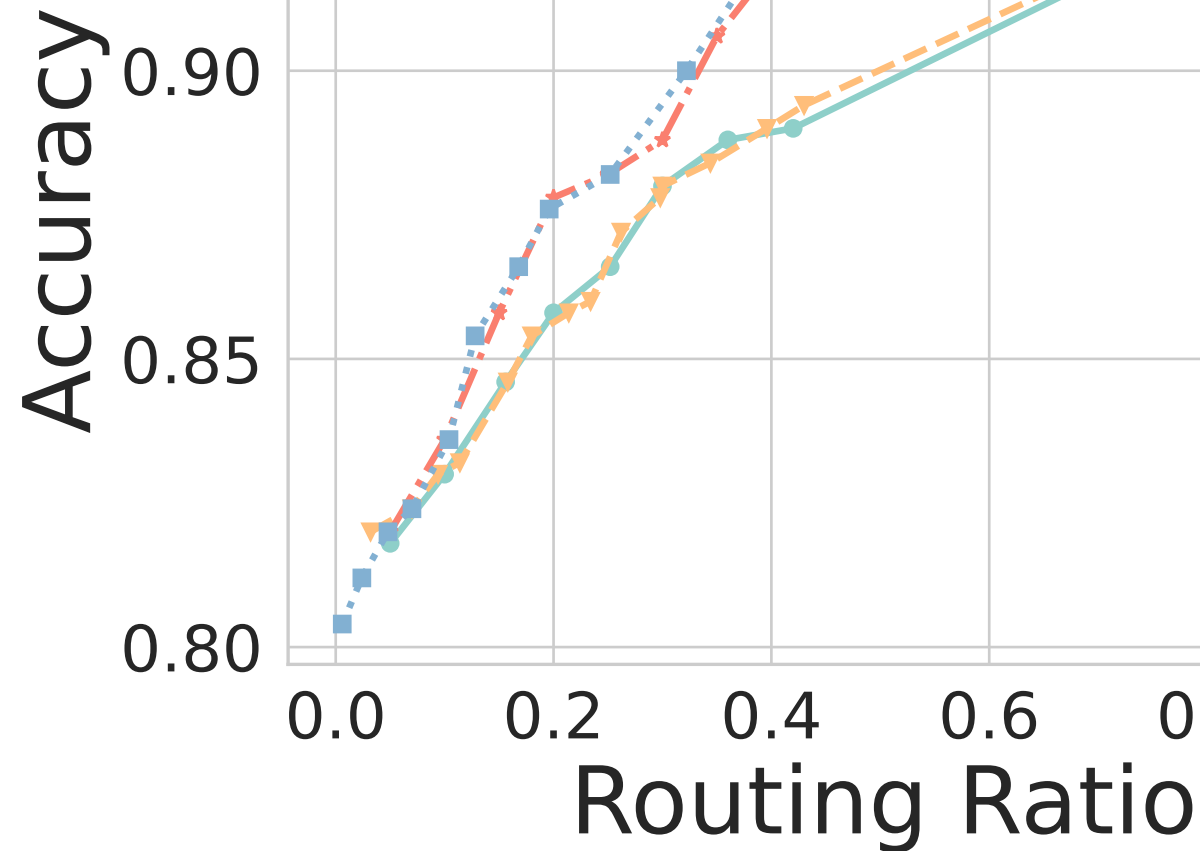

Supplement: supplementary_material [file cali_down_openbook_qa_llama-3.1-8b_Qwen_Qwen3-32B.pdf › Routing_SLM_LLMs/Proxy_routing_prediction/to_Qwen_Qwen3-32B/openbook_qa_as_downstream/cali_down_openbook_qa_llama-3.1-8b_Qwen_Qwen3-32B.pdf]

**OpenBookQA, llama-3.2-1b to Qwen3-32B**

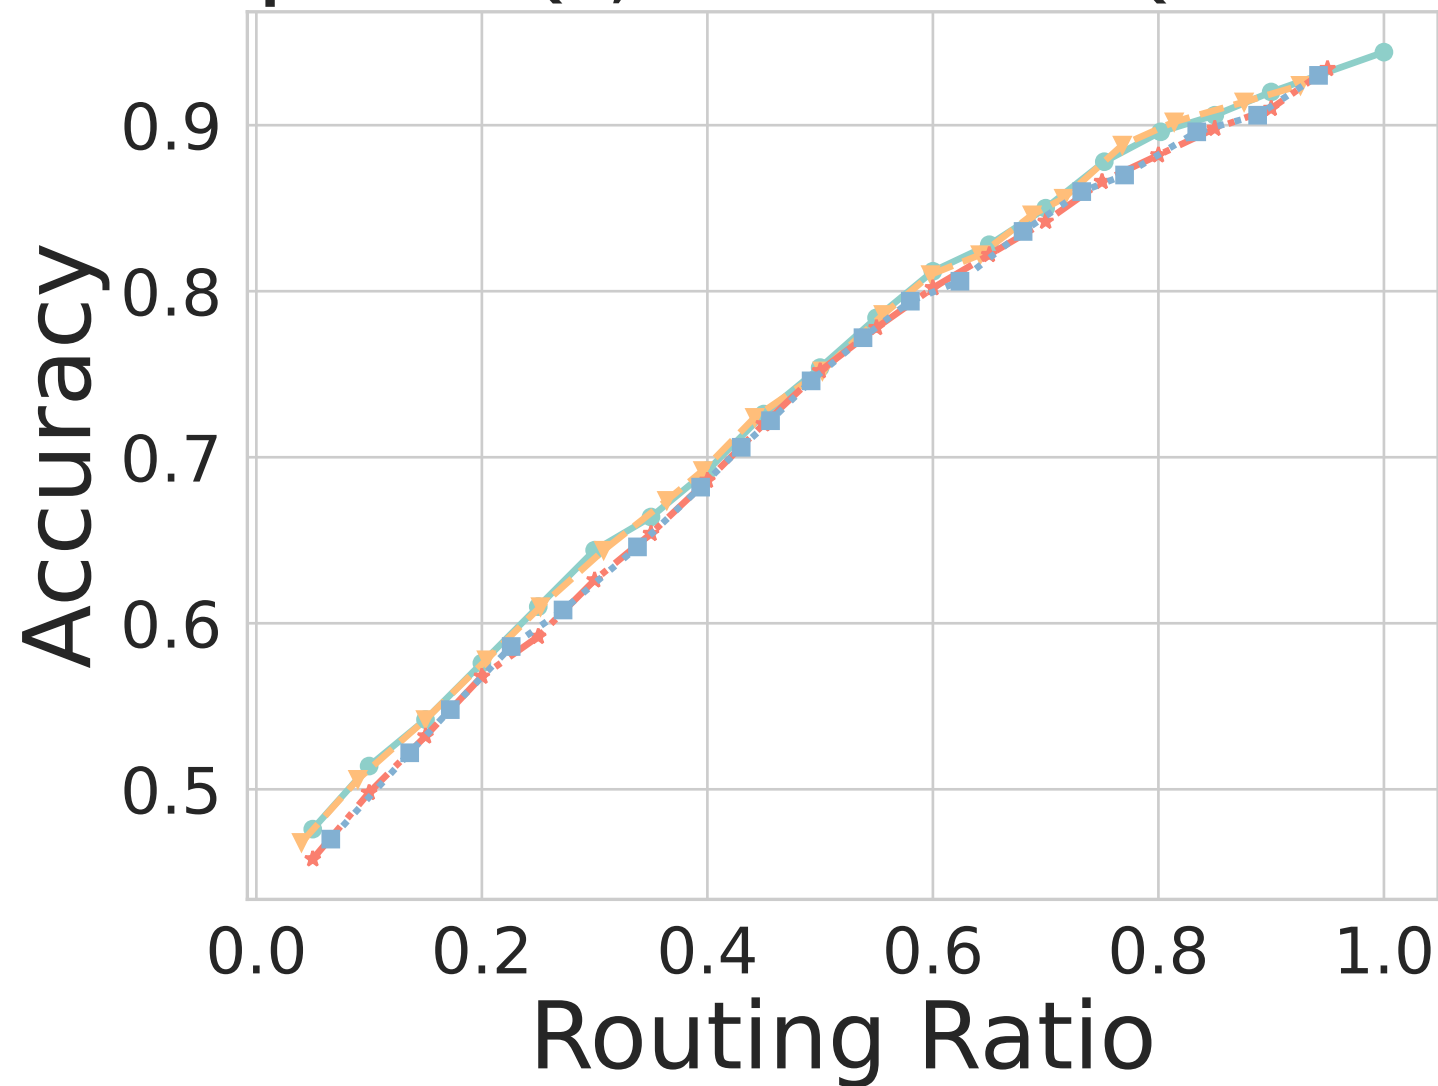

Supplement: supplementary_material [file cali_down_openbook_qa_llama-3.2-1b_Qwen_Qwen3-32B.pdf › Routing_SLM_LLMs/Proxy_routing_prediction/to_Qwen_Qwen3-32B/openbook_qa_as_downstream/cali_down_openbook_qa_llama-3.2-1b_Qwen_Qwen3-32B.pdf]

**OpenBookQA, llama-3.2-3b to Qwen3-32B**

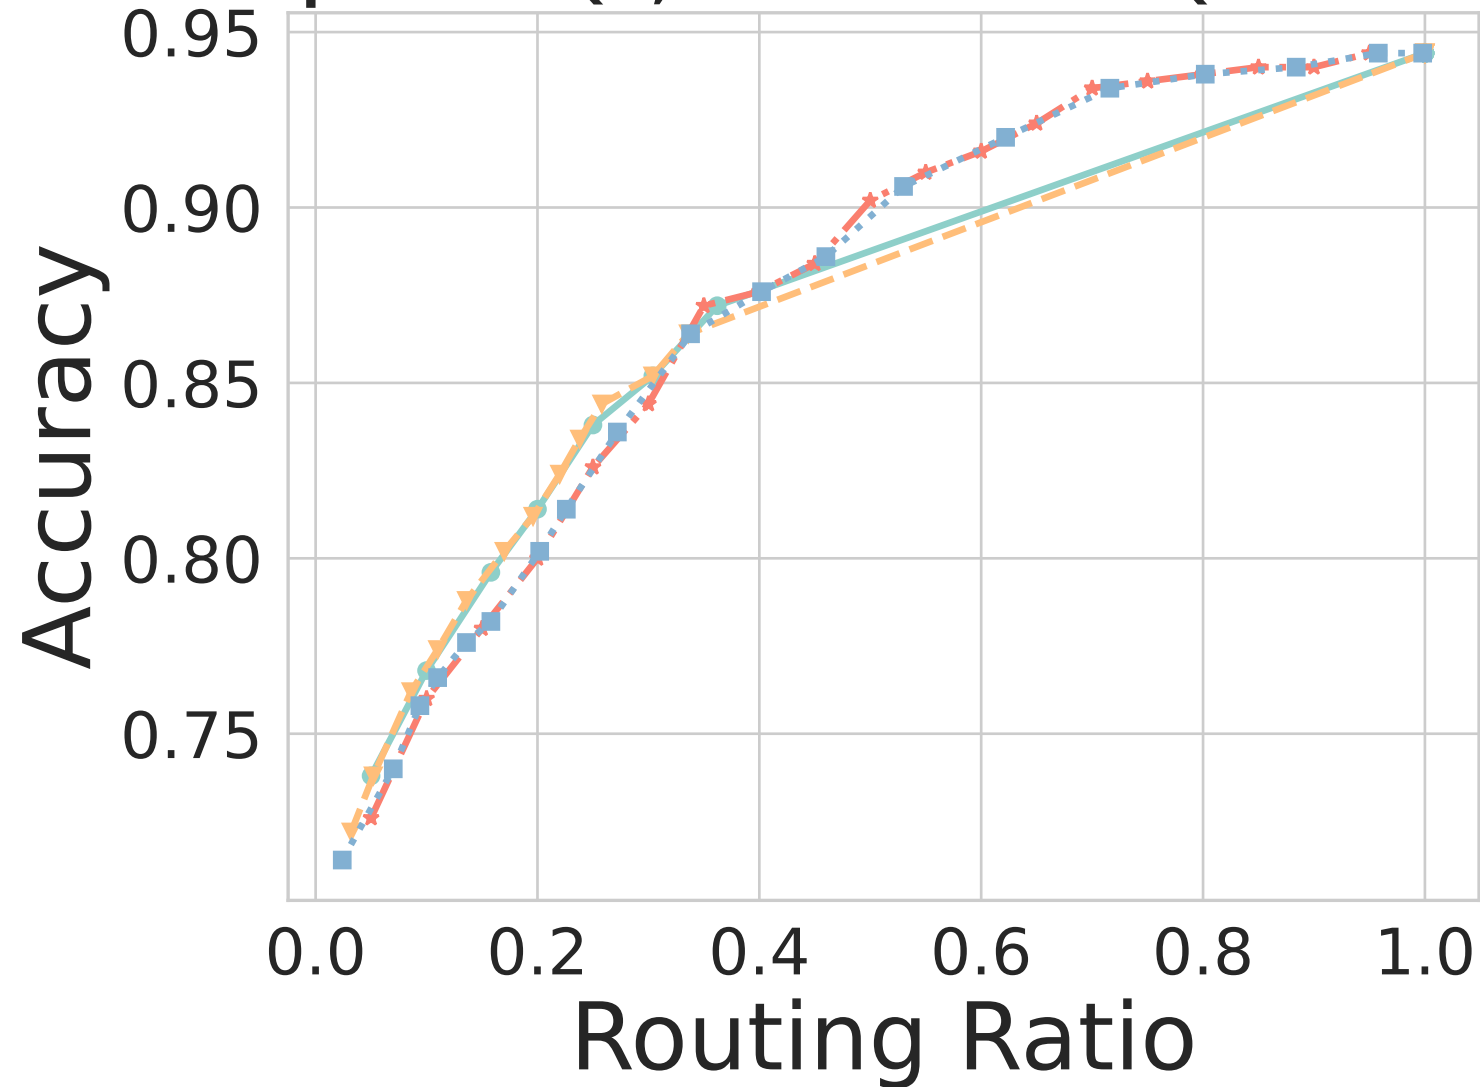

Supplement: supplementary_material [file cali_down_openbook_qa_llama-3.2-3b_Qwen_Qwen3-32B.pdf › Routing_SLM_LLMs/Proxy_routing_prediction/to_Qwen_Qwen3-32B/openbook_qa_as_downstream/cali_down_openbook_qa_llama-3.2-3b_Qwen_Qwen3-32B.pdf]

**OpenBookQA, mistral-7b to Qwen3-32B**

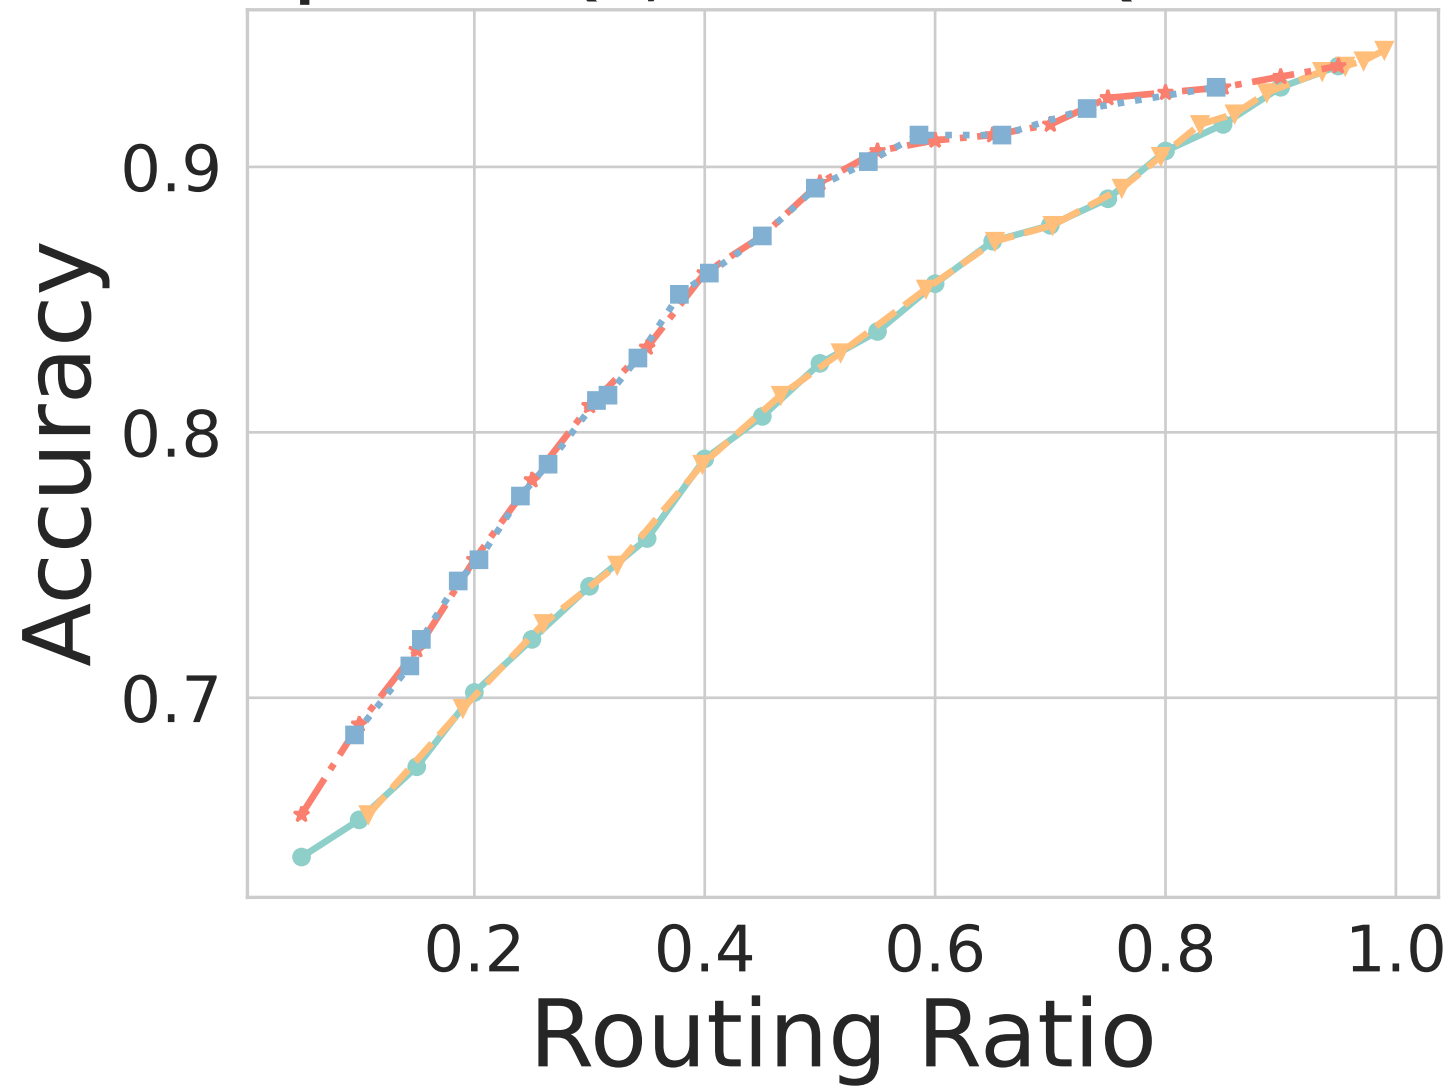

Supplement: supplementary_material [file cali_down_openbook_qa_mistral-7b_Qwen_Qwen3-32B.pdf › Routing_SLM_LLMs/Proxy_routing_prediction/to_Qwen_Qwen3-32B/openbook_qa_as_downstream/cali_down_openbook_qa_mistral-7b_Qwen_Qwen3-32B.pdf]

OpenBookQA, phi-3.5-mini to Qwen3-32B

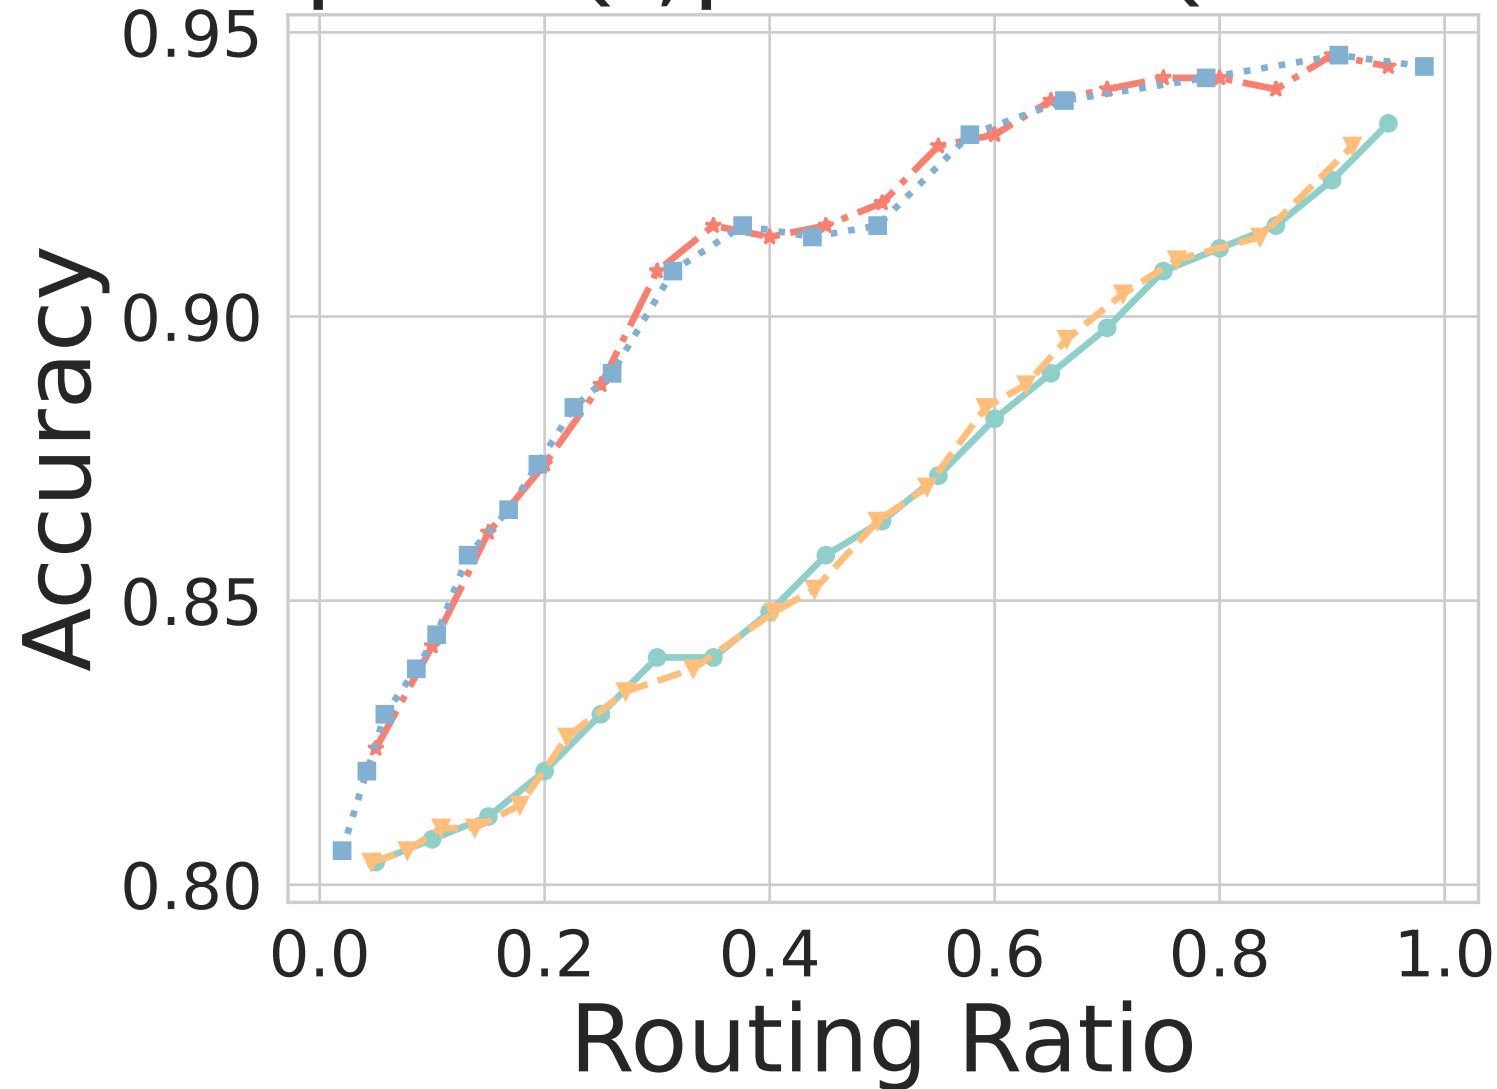

Supplement: supplementary_material [file cali_down_openbook_qa_phi-3.5-mini_Qwen_Qwen3-32B.pdf › Routing_SLM_LLMs/Proxy_routing_prediction/to_Qwen_Qwen3-32B/openbook_qa_as_downstream/cali_down_openbook_qa_phi-3.5-mini_Qwen_Qwen3-32B.pdf]

OpenBookQA, phi-4-mini-reasoning to Qwen3-32B

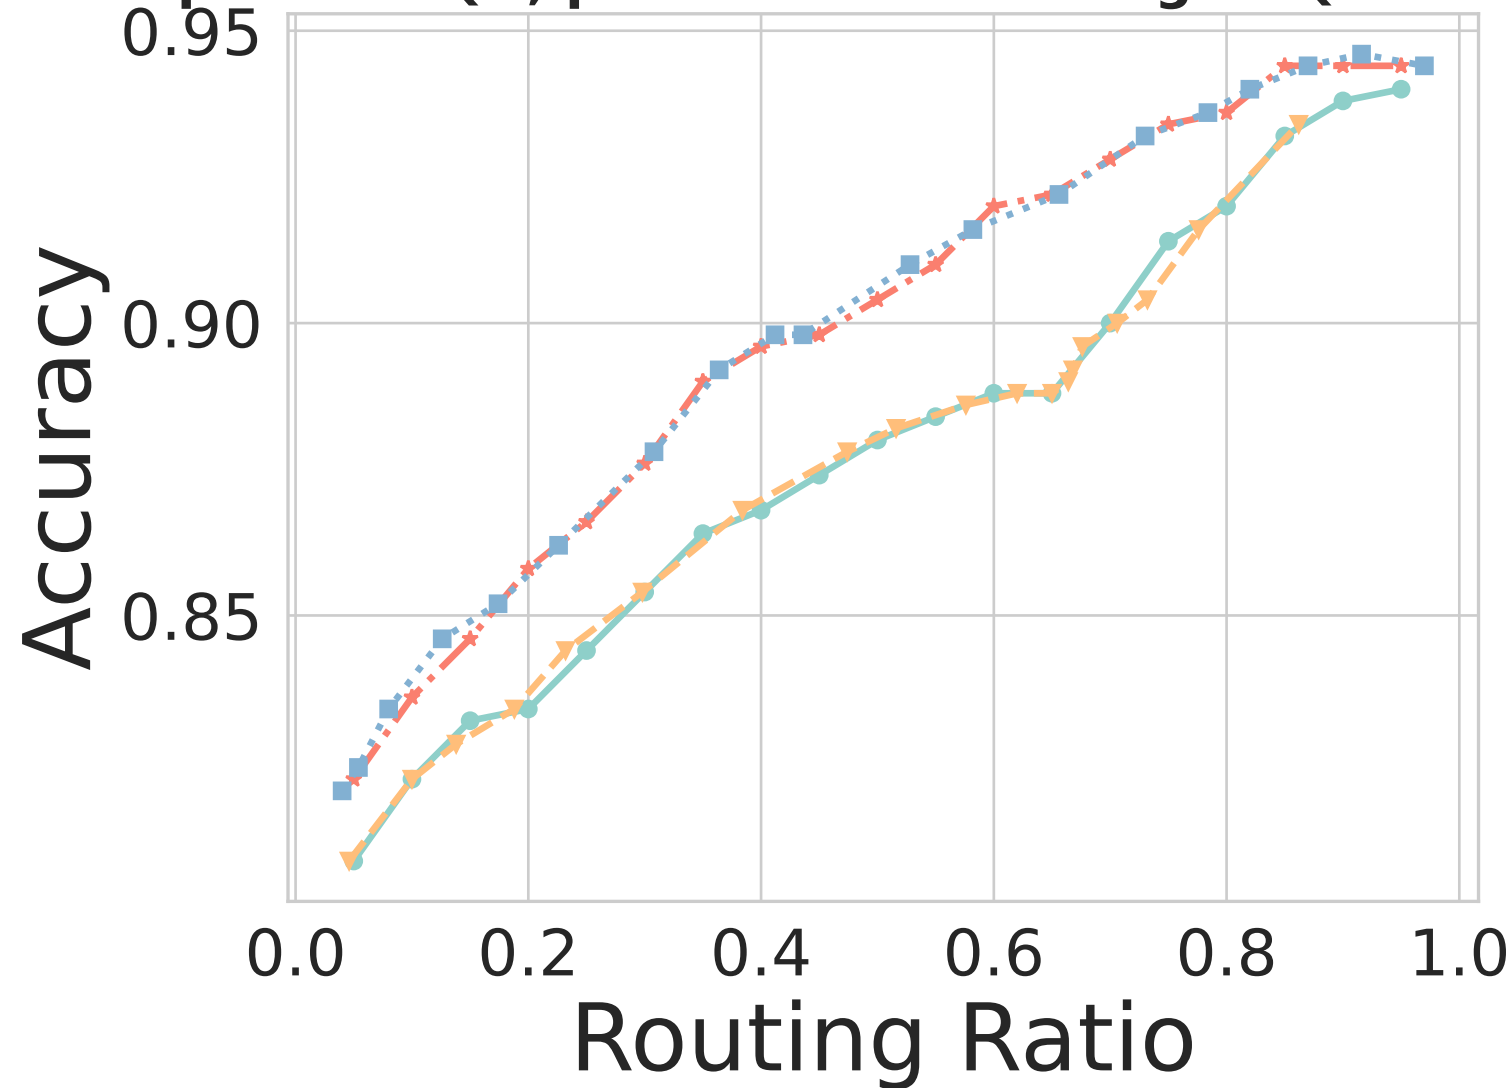

Supplement: supplementary_material [file cali_down_openbook_qa_phi-4-mini-reasoning_Qwen_Qwen3-32B.pdf › Routing_SLM_LLMs/Proxy_routing_prediction/to_Qwen_Qwen3-32B/openbook_qa_as_downstream/cali_down_openbook_qa_phi-4-mini-reasoning_Qwen_Qwen3-32B.pdf]

OpenBookQA, qwen-2.5-7b to Qwen3-32B

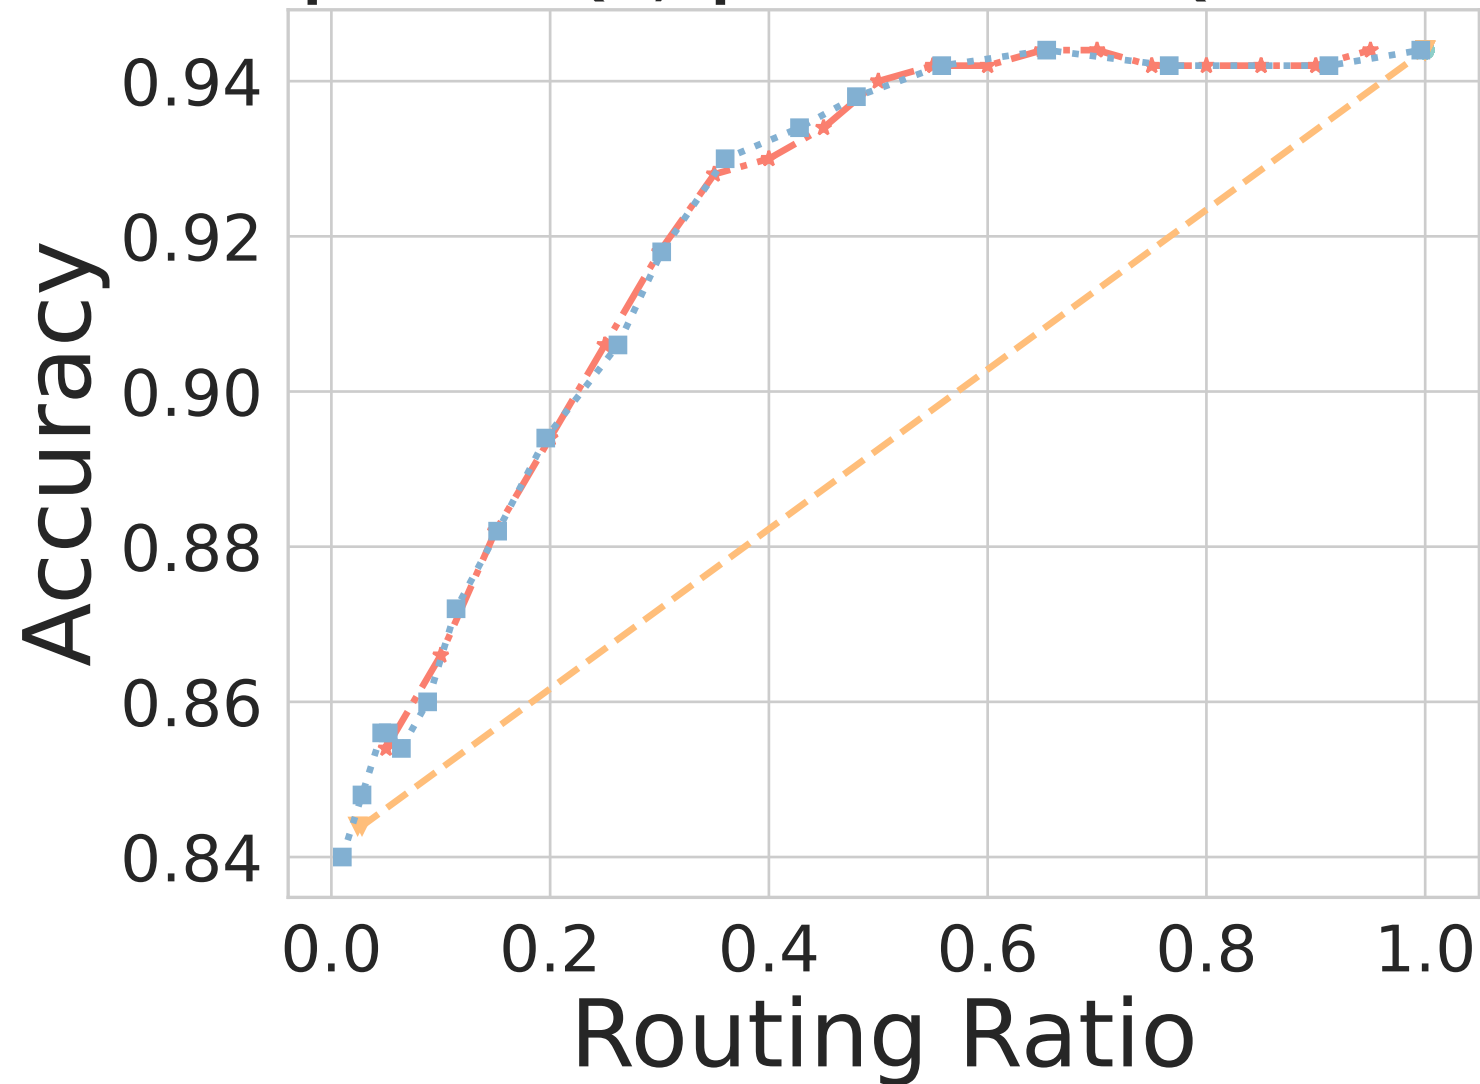

Supplement: supplementary_material [file cali_down_openbook_qa_qwen-2.5-7b_Qwen_Qwen3-32B.pdf › Routing_SLM_LLMs/Proxy_routing_prediction/to_Qwen_Qwen3-32B/openbook_qa_as_downstream/cali_down_openbook_qa_qwen-2.5-7b_Qwen_Qwen3-32B.pdf]

OpenBookQA, rwkv to Qwen3-32B

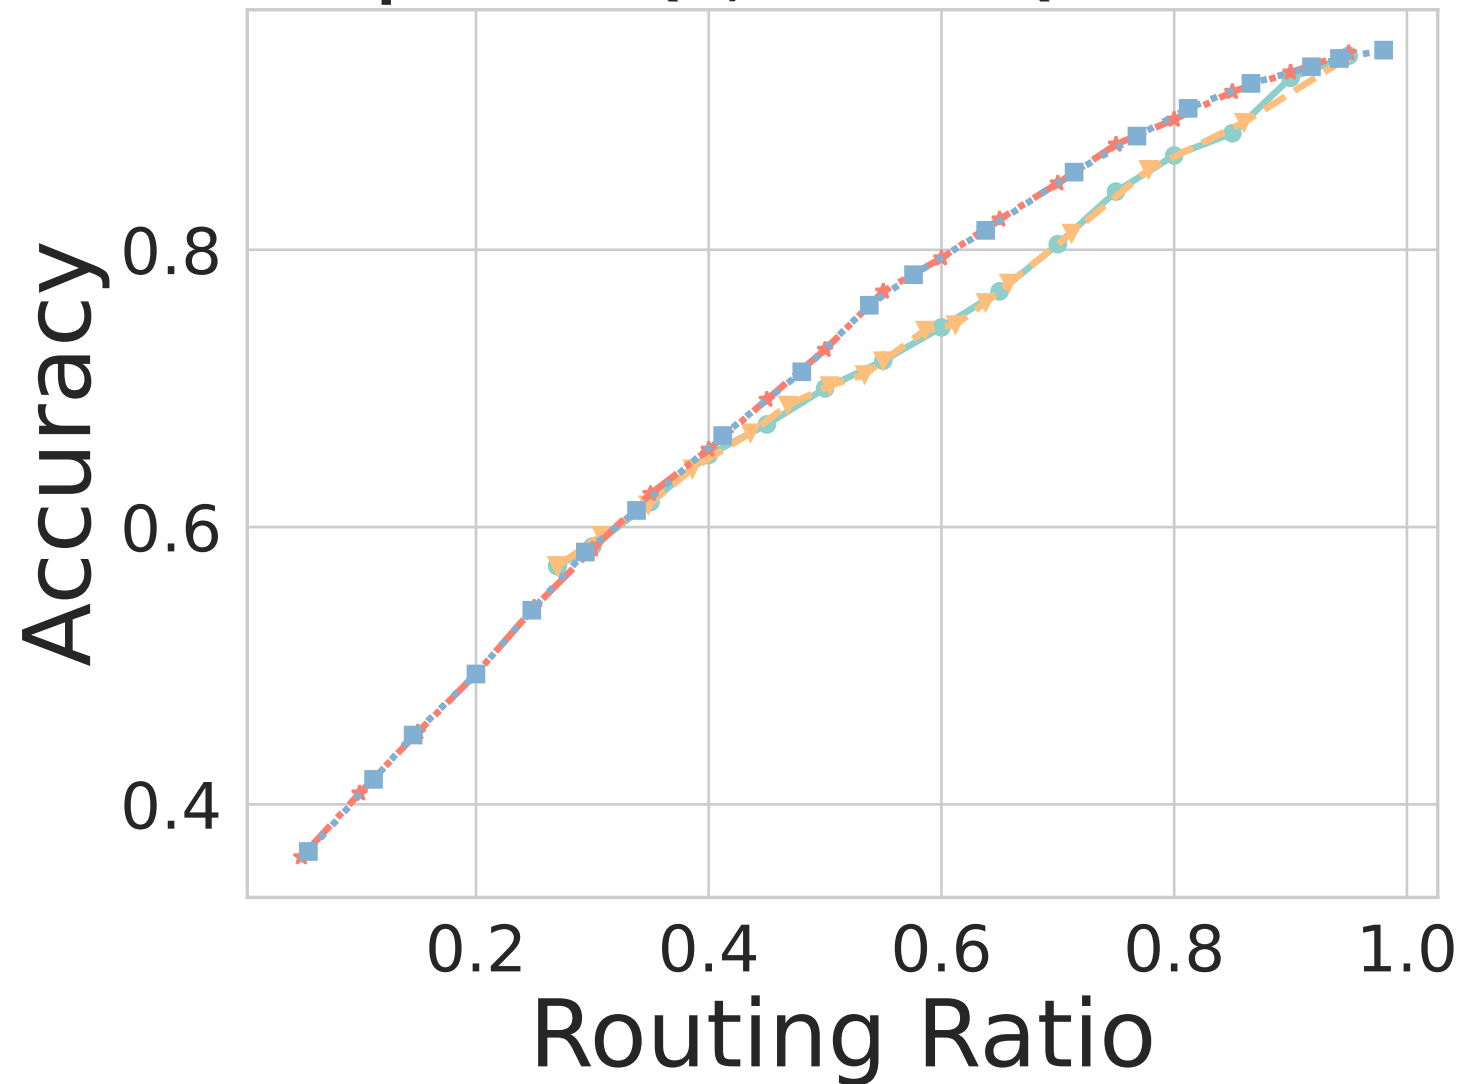

Supplement: supplementary_material [file cali_down_openbook_qa_rwkv_Qwen_Qwen3-32B.pdf › Routing_SLM_LLMs/Proxy_routing_prediction/to_Qwen_Qwen3-32B/openbook_qa_as_downstream/cali_down_openbook_qa_rwkv_Qwen_Qwen3-32B.pdf]

**PIQA, Qwen3-0.6B to Qwen3-32B**

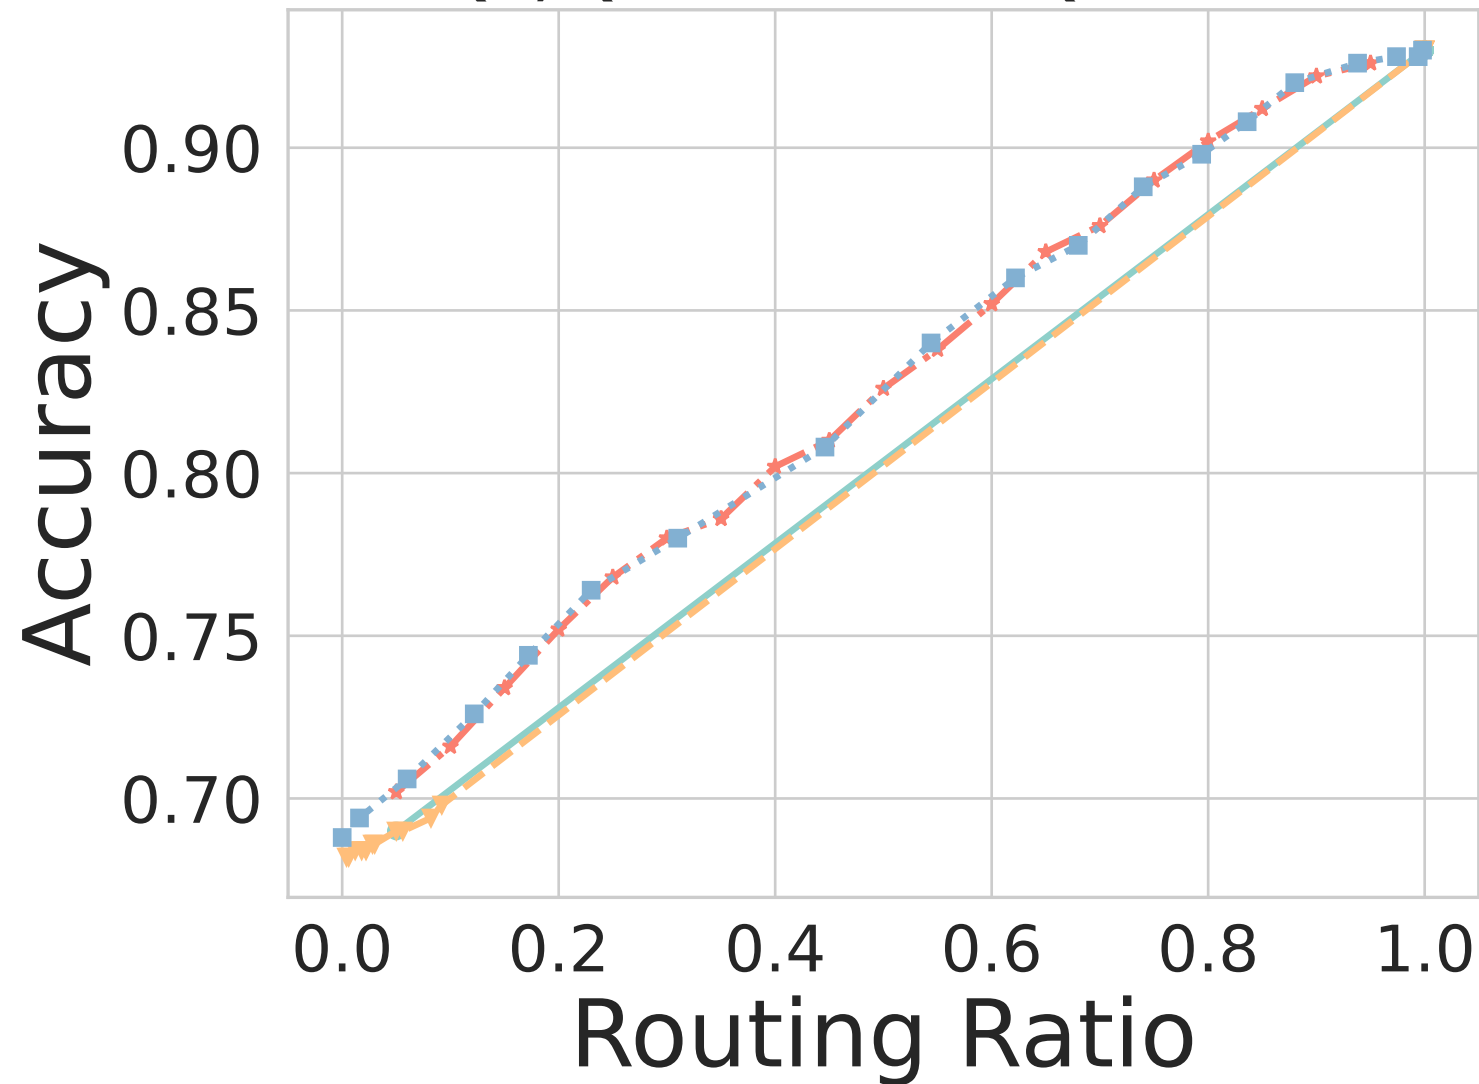

Supplement: supplementary_material [file cali_down_pi_qa_Qwen3-0.6B_Qwen_Qwen3-32B.pdf › Routing_SLM_LLMs/Proxy_routing_prediction/to_Qwen_Qwen3-32B/pi_qa_as_downstream/cali_down_pi_qa_Qwen3-0.6B_Qwen_Qwen3-32B.pdf]

**PIQA, Qwen3-1.7B to Qwen3-32B**

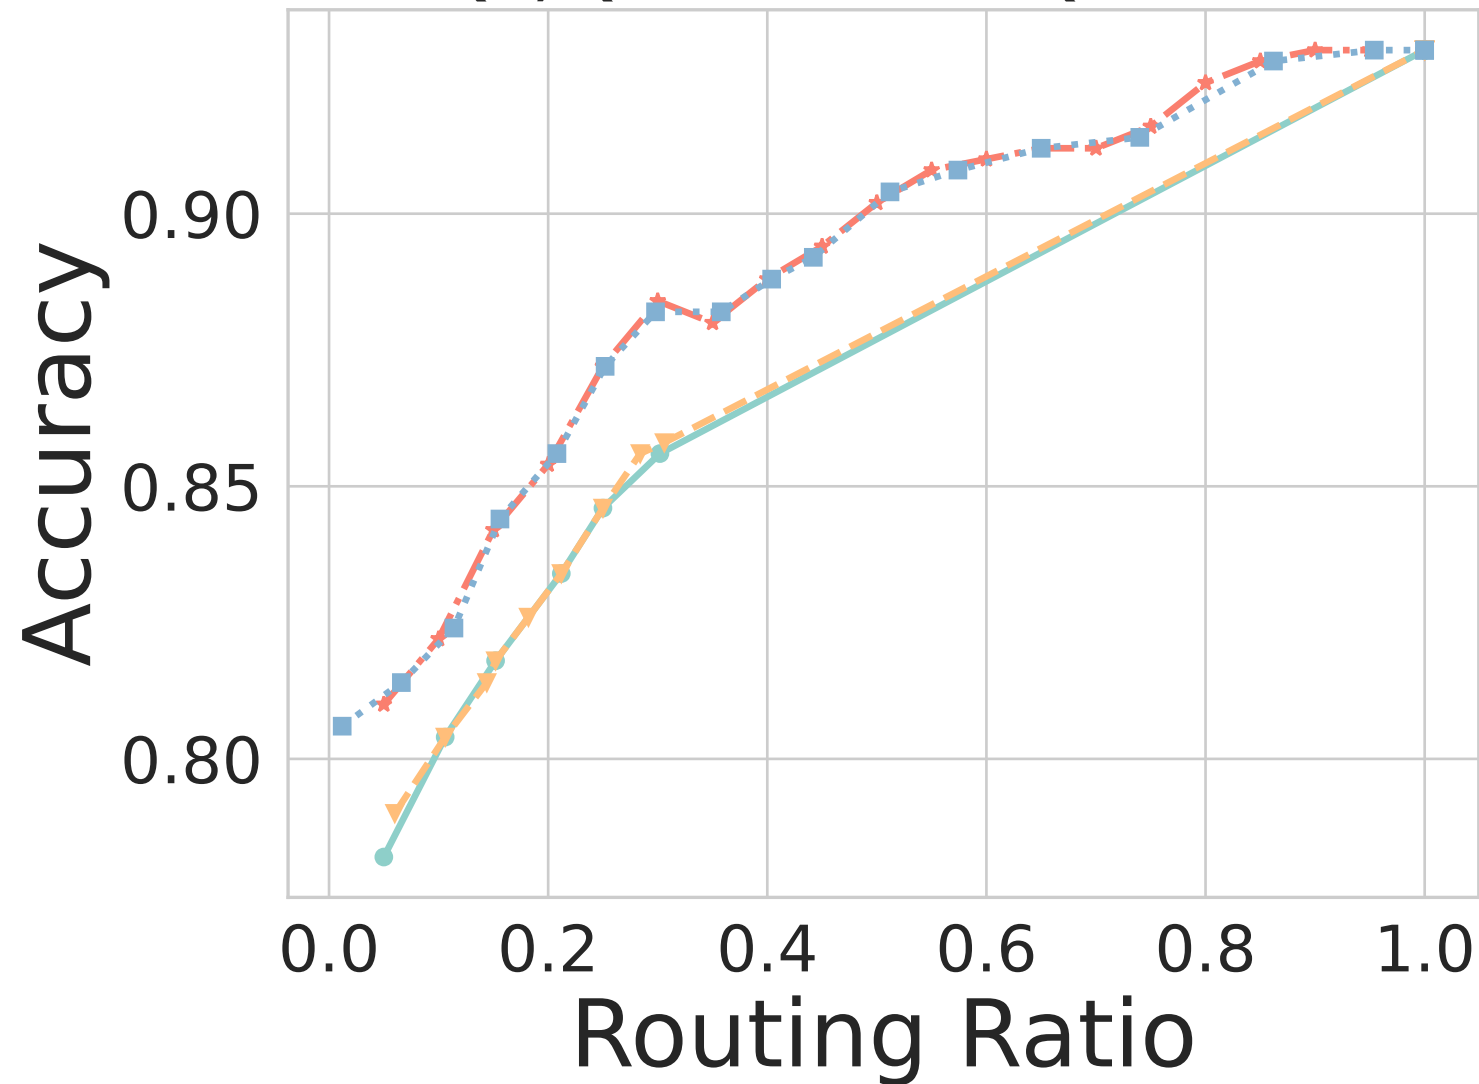

Supplement: supplementary_material [file cali_down_pi_qa_Qwen3-1.7B_Qwen_Qwen3-32B.pdf › Routing_SLM_LLMs/Proxy_routing_prediction/to_Qwen_Qwen3-32B/pi_qa_as_downstream/cali_down_pi_qa_Qwen3-1.7B_Qwen_Qwen3-32B.pdf]

**PIQA, Qwen3-4B to Qwen3-32B**

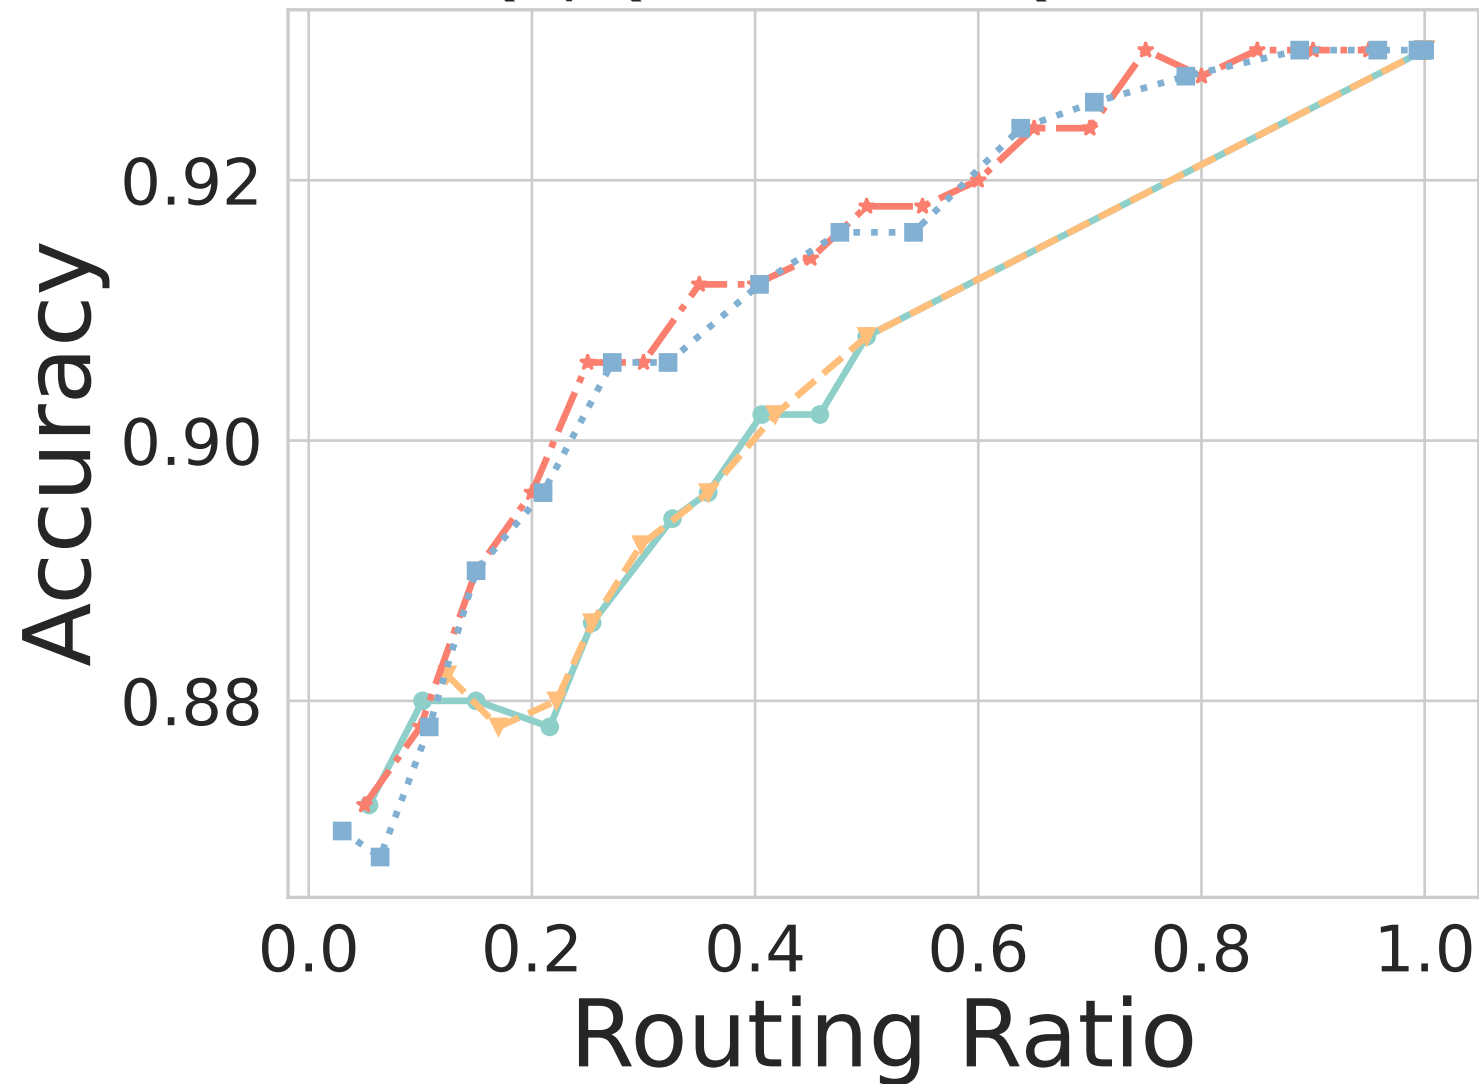

Supplement: supplementary_material [file cali_down_pi_qa_Qwen3-4B_Qwen_Qwen3-32B.pdf › Routing_SLM_LLMs/Proxy_routing_prediction/to_Qwen_Qwen3-32B/pi_qa_as_downstream/cali_down_pi_qa_Qwen3-4B_Qwen_Qwen3-32B.pdf]

**PIQA, granite-3.1-8b to Qwen3-32B**

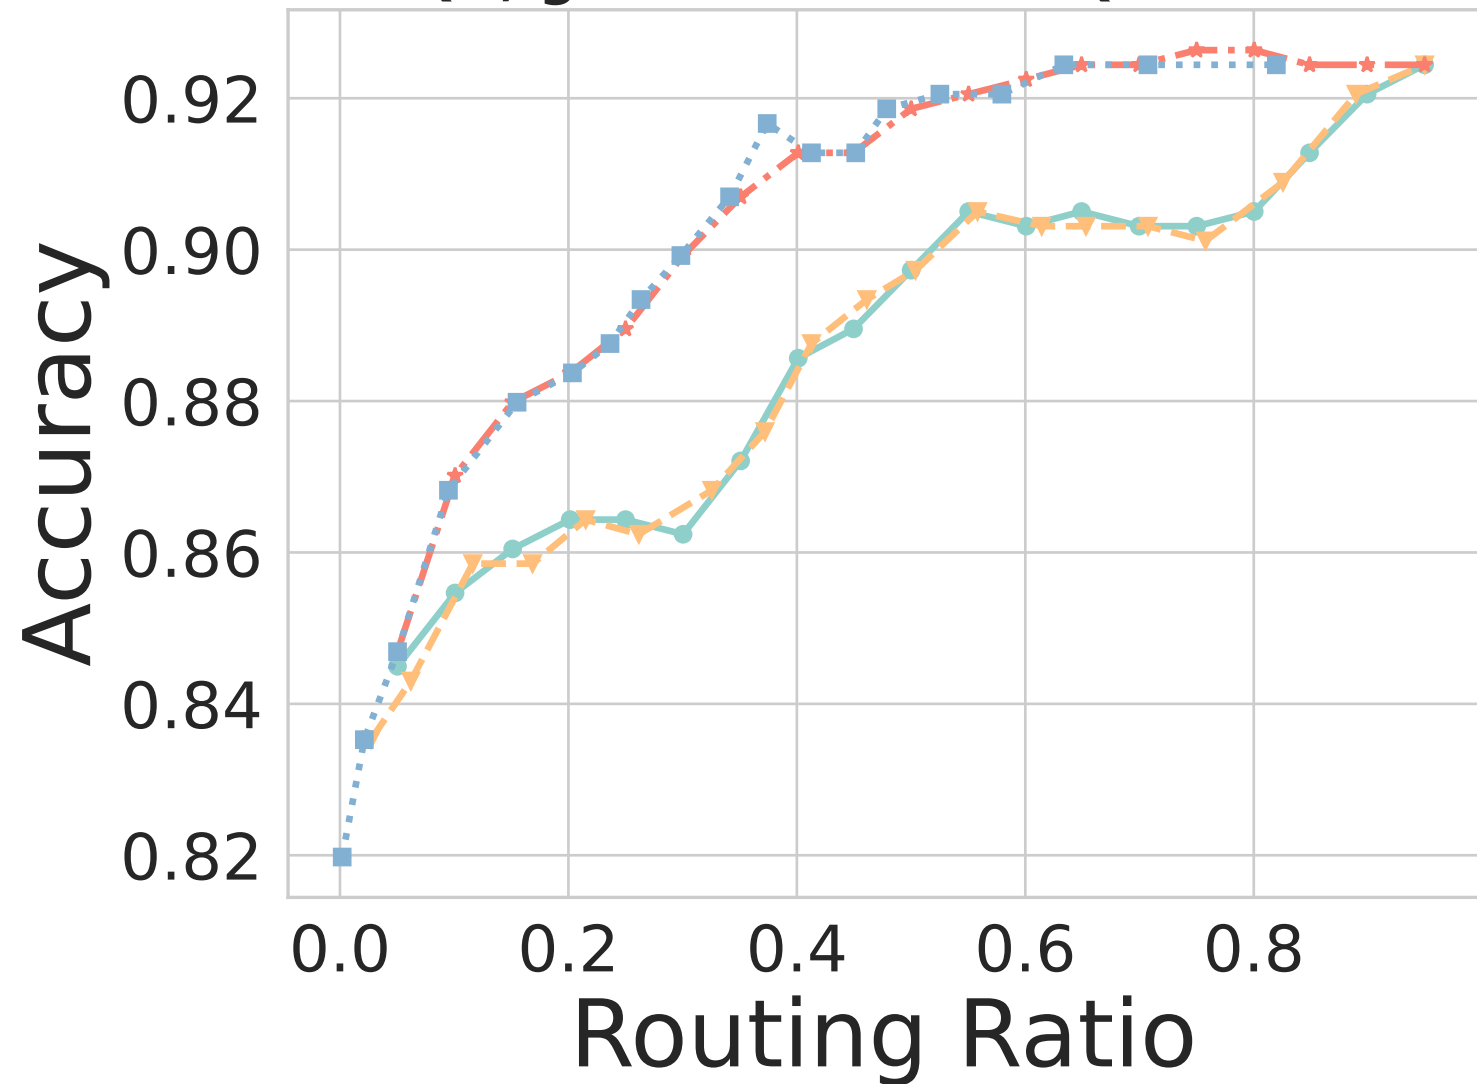

Supplement: supplementary_material [file cali_down_pi_qa_granite-3.1-8b_Qwen_Qwen3-32B.pdf › Routing_SLM_LLMs/Proxy_routing_prediction/to_Qwen_Qwen3-32B/pi_qa_as_downstream/cali_down_pi_qa_granite-3.1-8b_Qwen_Qwen3-32B.pdf]

PIQA, llama-3.1-8b to Qwen3-32B

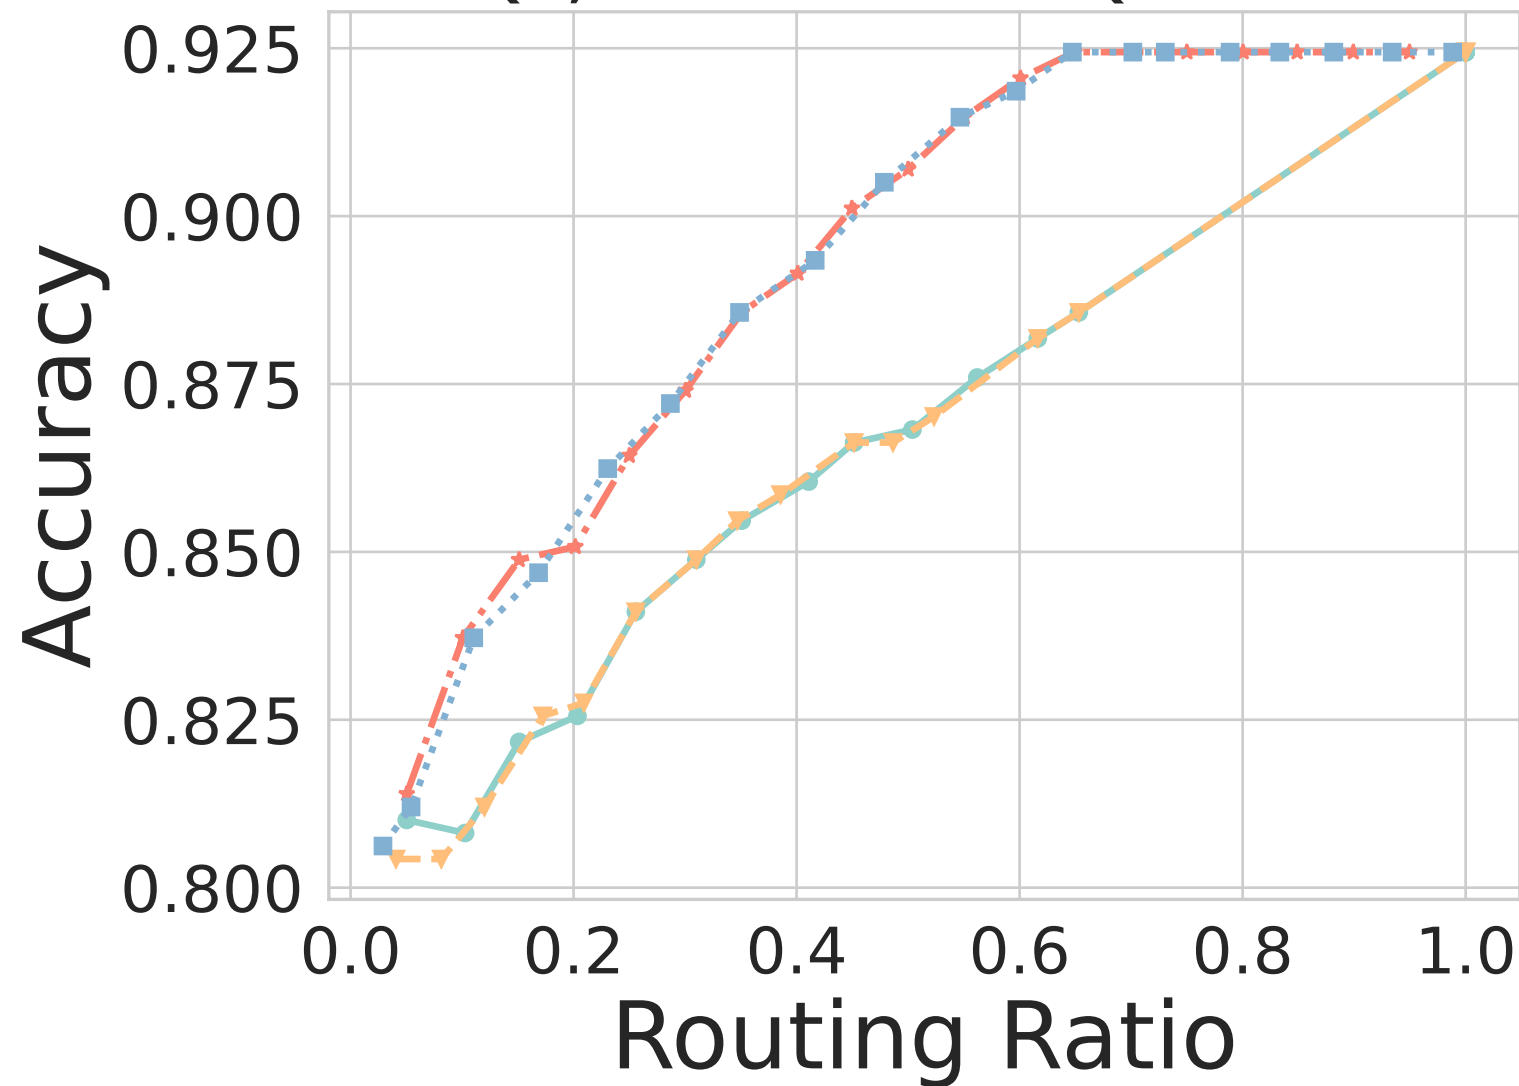

Supplement: supplementary_material [file cali_down_pi_qa_llama-3.1-8b_Qwen_Qwen3-32B.pdf › Routing_SLM_LLMs/Proxy_routing_prediction/to_Qwen_Qwen3-32B/pi_qa_as_downstream/cali_down_pi_qa_llama-3.1-8b_Qwen_Qwen3-32B.pdf]

**PIQA, llama-3.2-1b to Qwen3-32B**

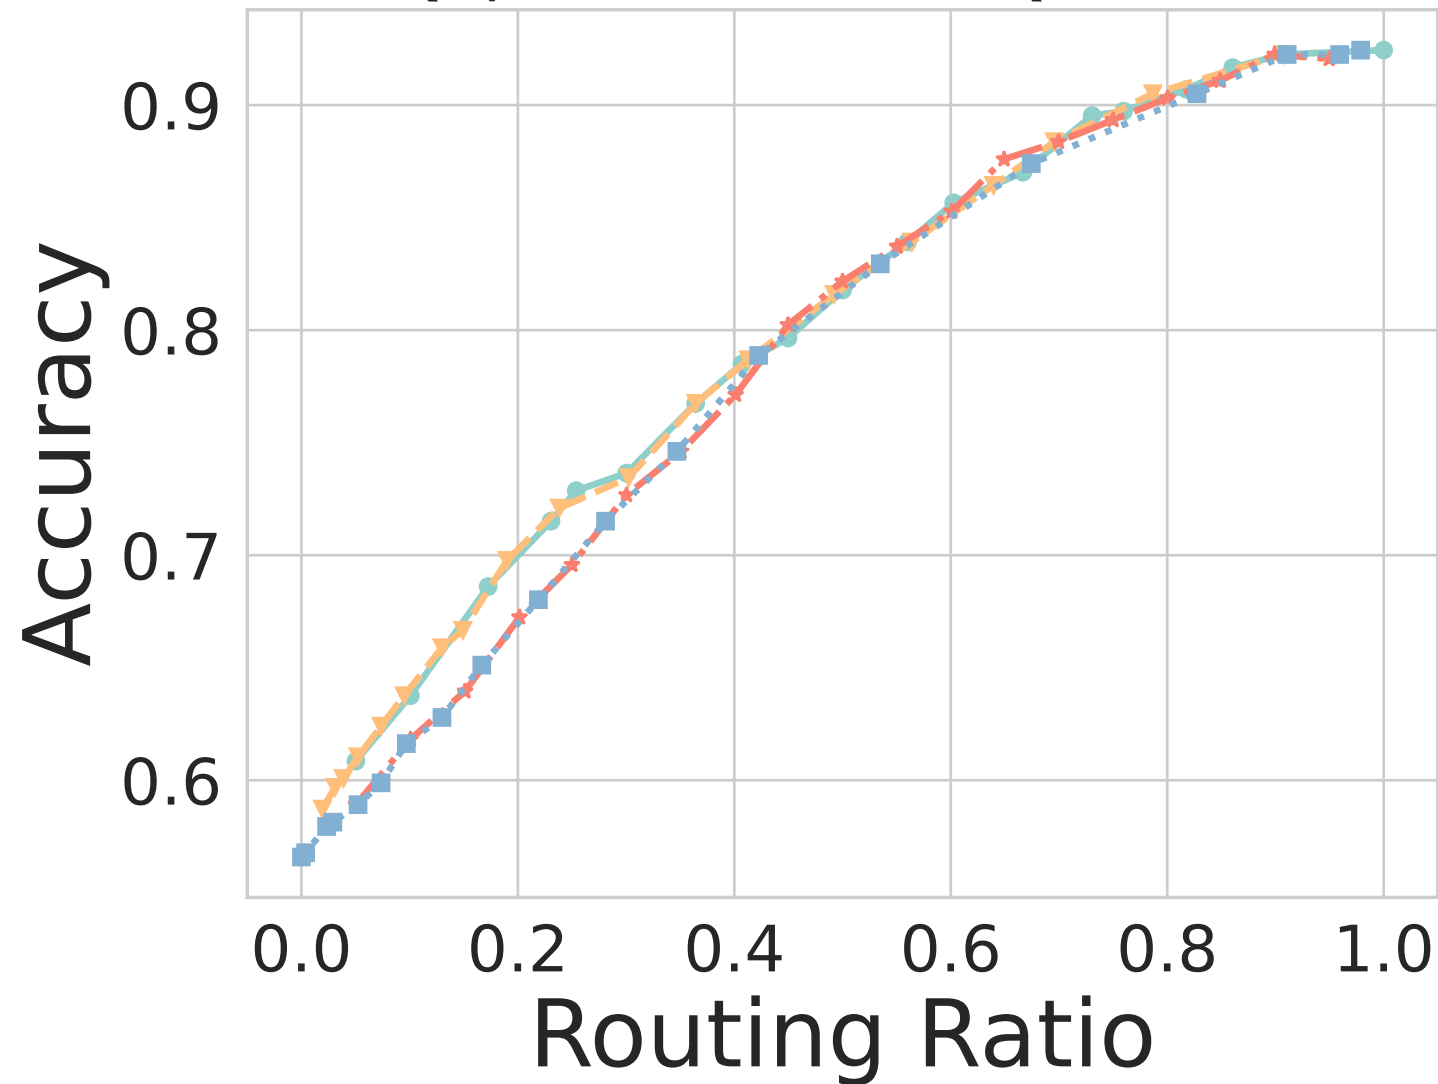

Supplement: supplementary_material [file cali_down_pi_qa_llama-3.2-1b_Qwen_Qwen3-32B.pdf › Routing_SLM_LLMs/Proxy_routing_prediction/to_Qwen_Qwen3-32B/pi_qa_as_downstream/cali_down_pi_qa_llama-3.2-1b_Qwen_Qwen3-32B.pdf]

PIQA, llama-3.2-3b to Qwen3-32B

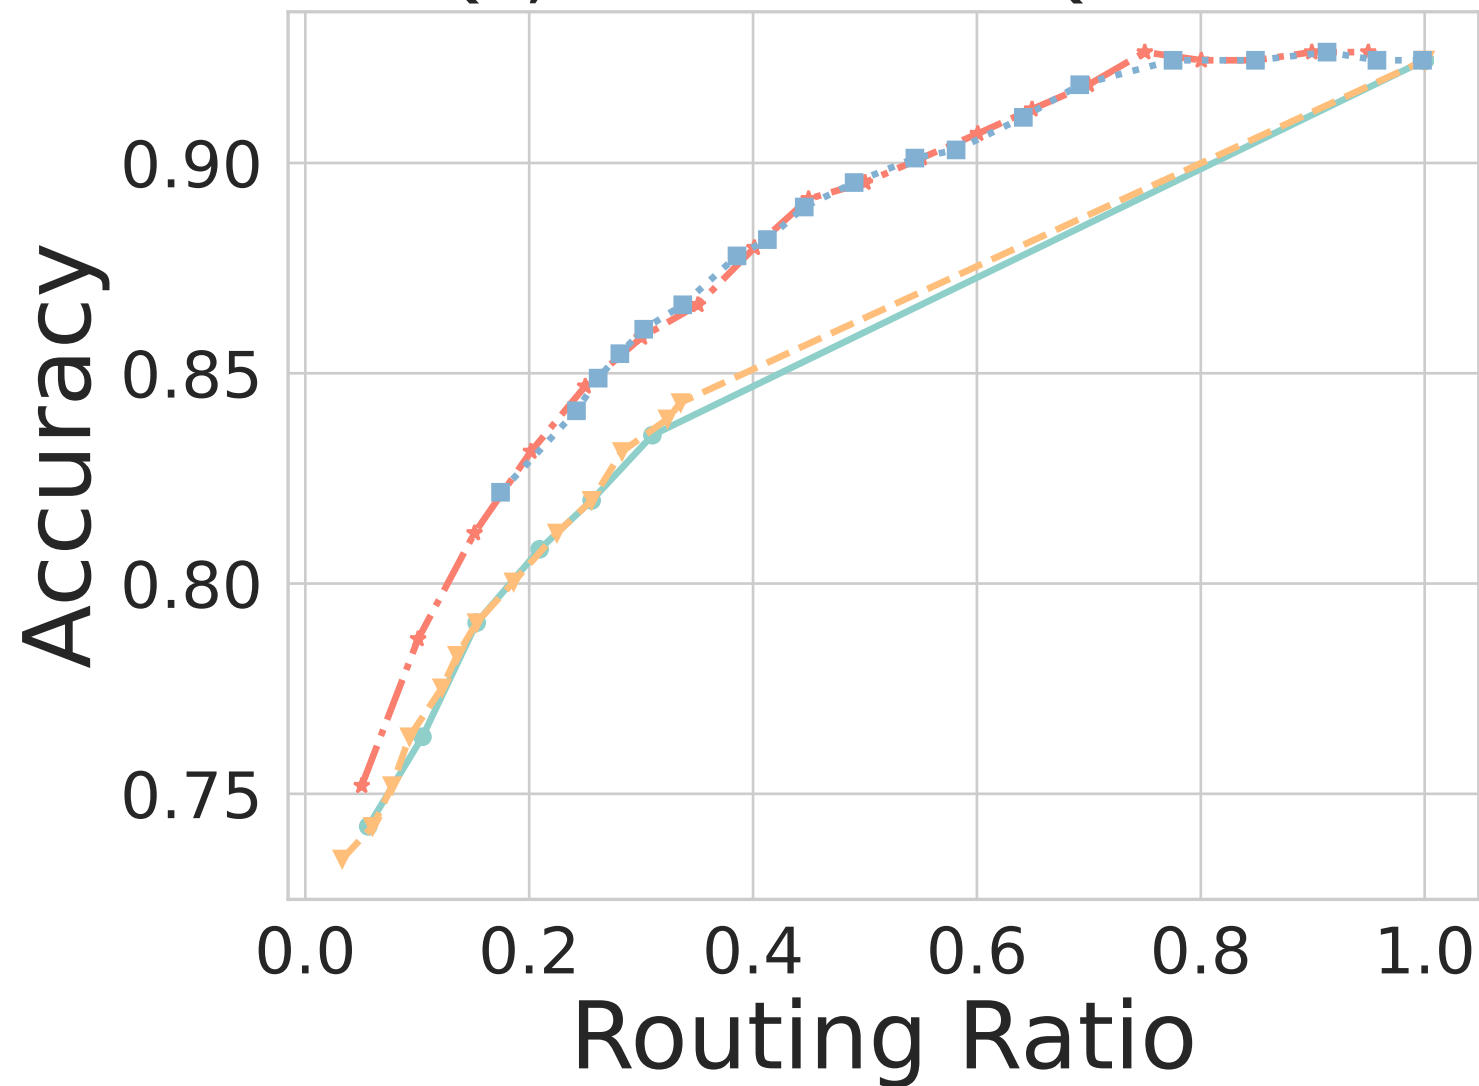

Supplement: supplementary_material [file cali_down_pi_qa_llama-3.2-3b_Qwen_Qwen3-32B.pdf › Routing_SLM_LLMs/Proxy_routing_prediction/to_Qwen_Qwen3-32B/pi_qa_as_downstream/cali_down_pi_qa_llama-3.2-3b_Qwen_Qwen3-32B.pdf]

**PIQA, mistral-7b to Qwen3-32B**

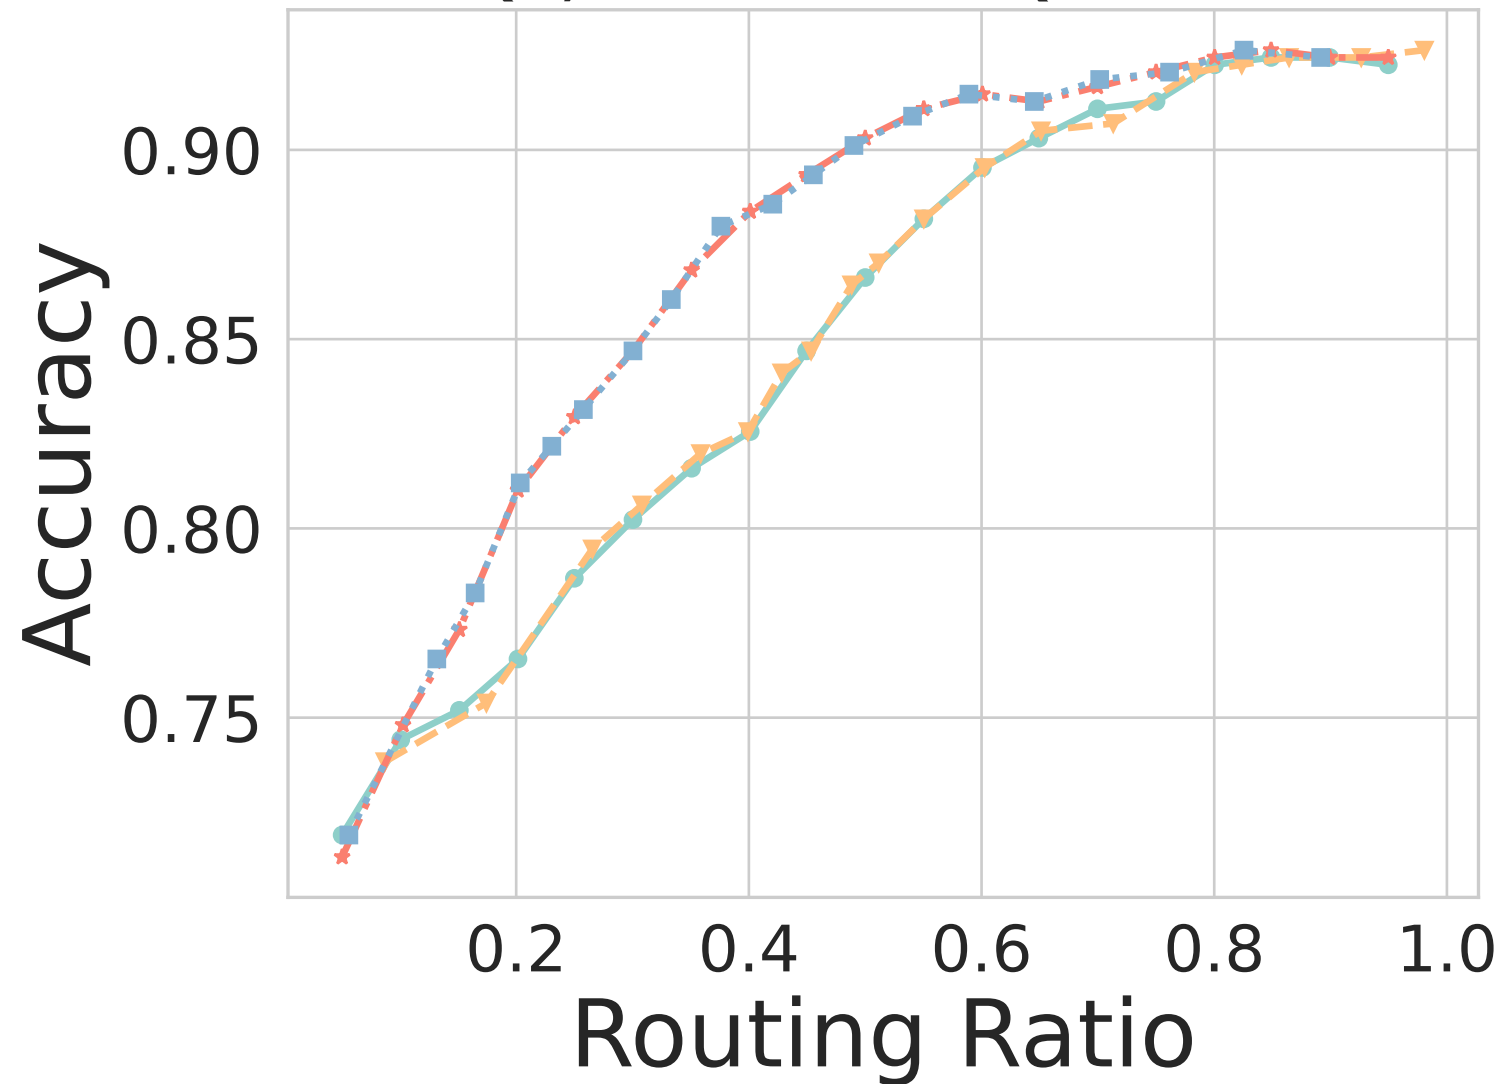

Supplement: supplementary_material [file cali_down_pi_qa_mistral-7b_Qwen_Qwen3-32B.pdf › Routing_SLM_LLMs/Proxy_routing_prediction/to_Qwen_Qwen3-32B/pi_qa_as_downstream/cali_down_pi_qa_mistral-7b_Qwen_Qwen3-32B.pdf]

**PIQA, phi-3.5-mini to Qwen3-32B**

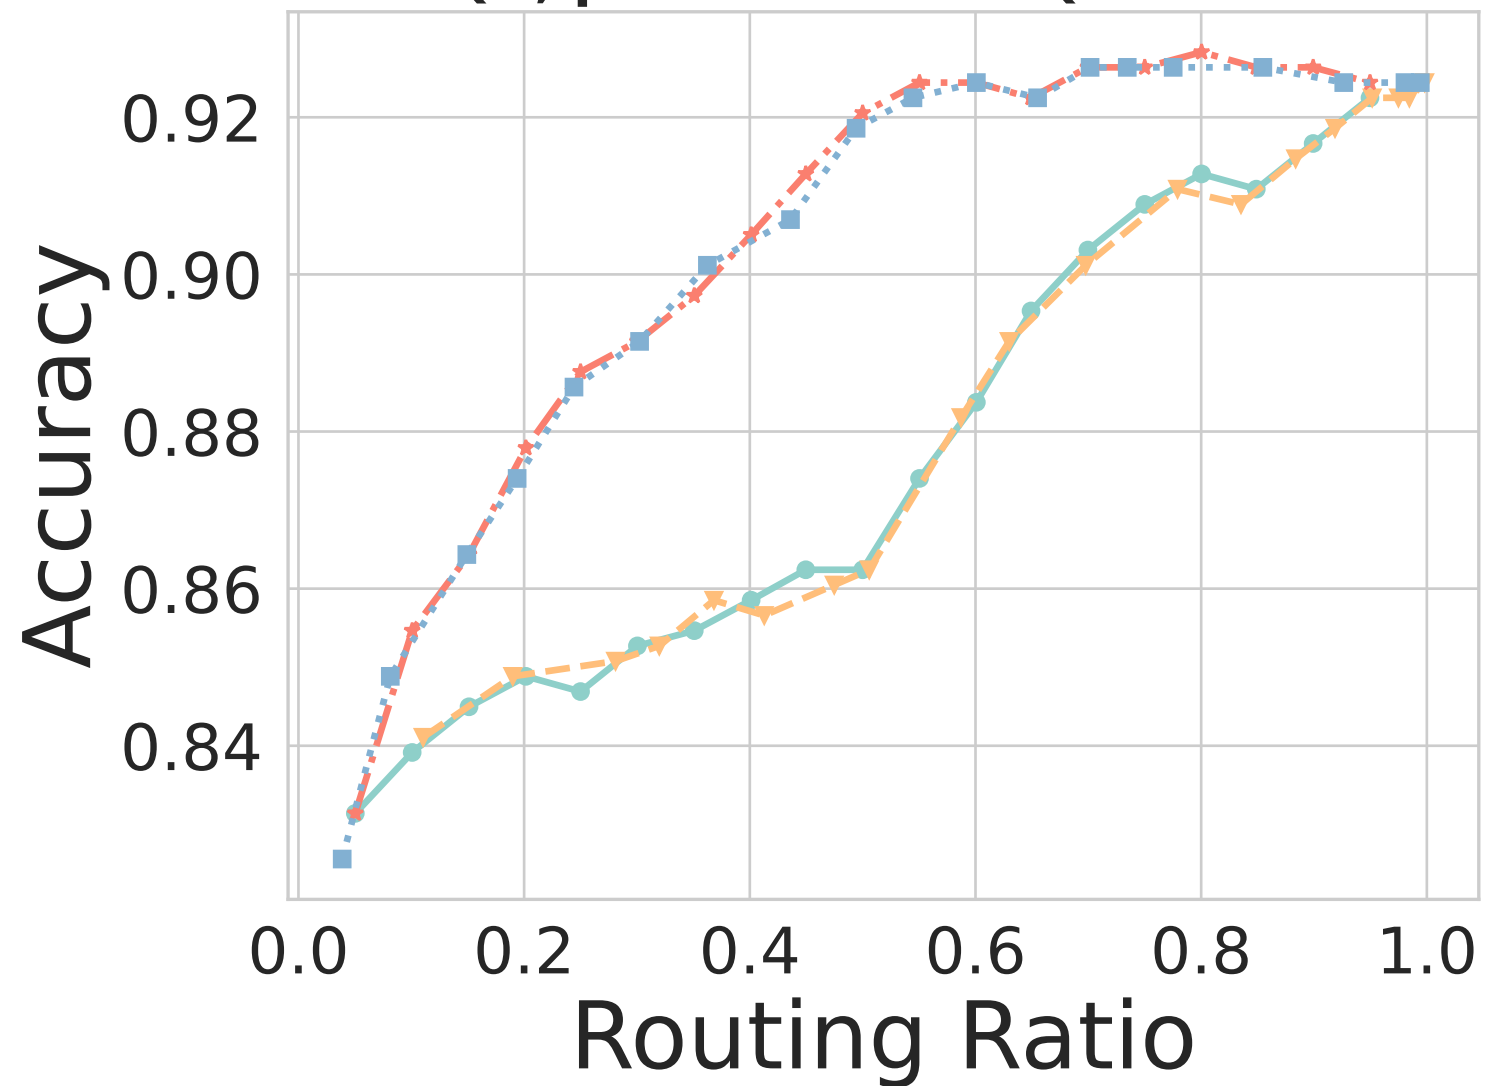

Supplement: supplementary_material [file cali_down_pi_qa_phi-3.5-mini_Qwen_Qwen3-32B.pdf › Routing_SLM_LLMs/Proxy_routing_prediction/to_Qwen_Qwen3-32B/pi_qa_as_downstream/cali_down_pi_qa_phi-3.5-mini_Qwen_Qwen3-32B.pdf]

**PIQA, phi-4-mini-reasoning to Qwen3-32B**

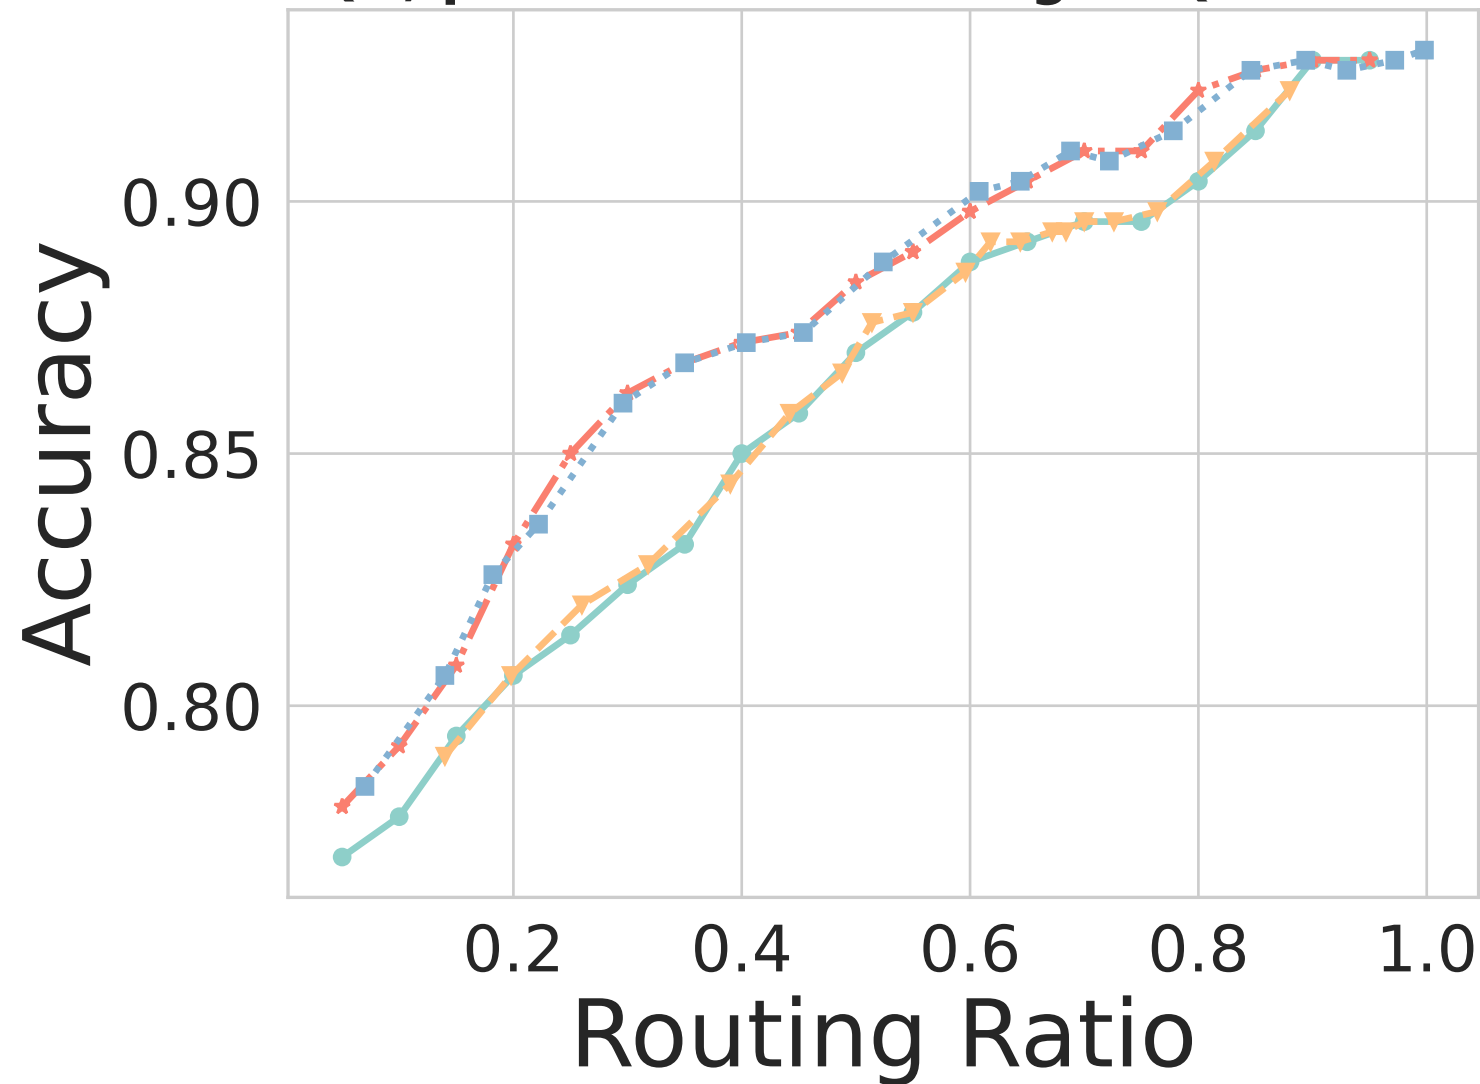

Supplement: supplementary_material [file cali_down_pi_qa_phi-4-mini-reasoning_Qwen_Qwen3-32B.pdf › Routing_SLM_LLMs/Proxy_routing_prediction/to_Qwen_Qwen3-32B/pi_qa_as_downstream/cali_down_pi_qa_phi-4-mini-reasoning_Qwen_Qwen3-32B.pdf]

**PIQA, qwen-2.5-7b to Qwen3-32B**

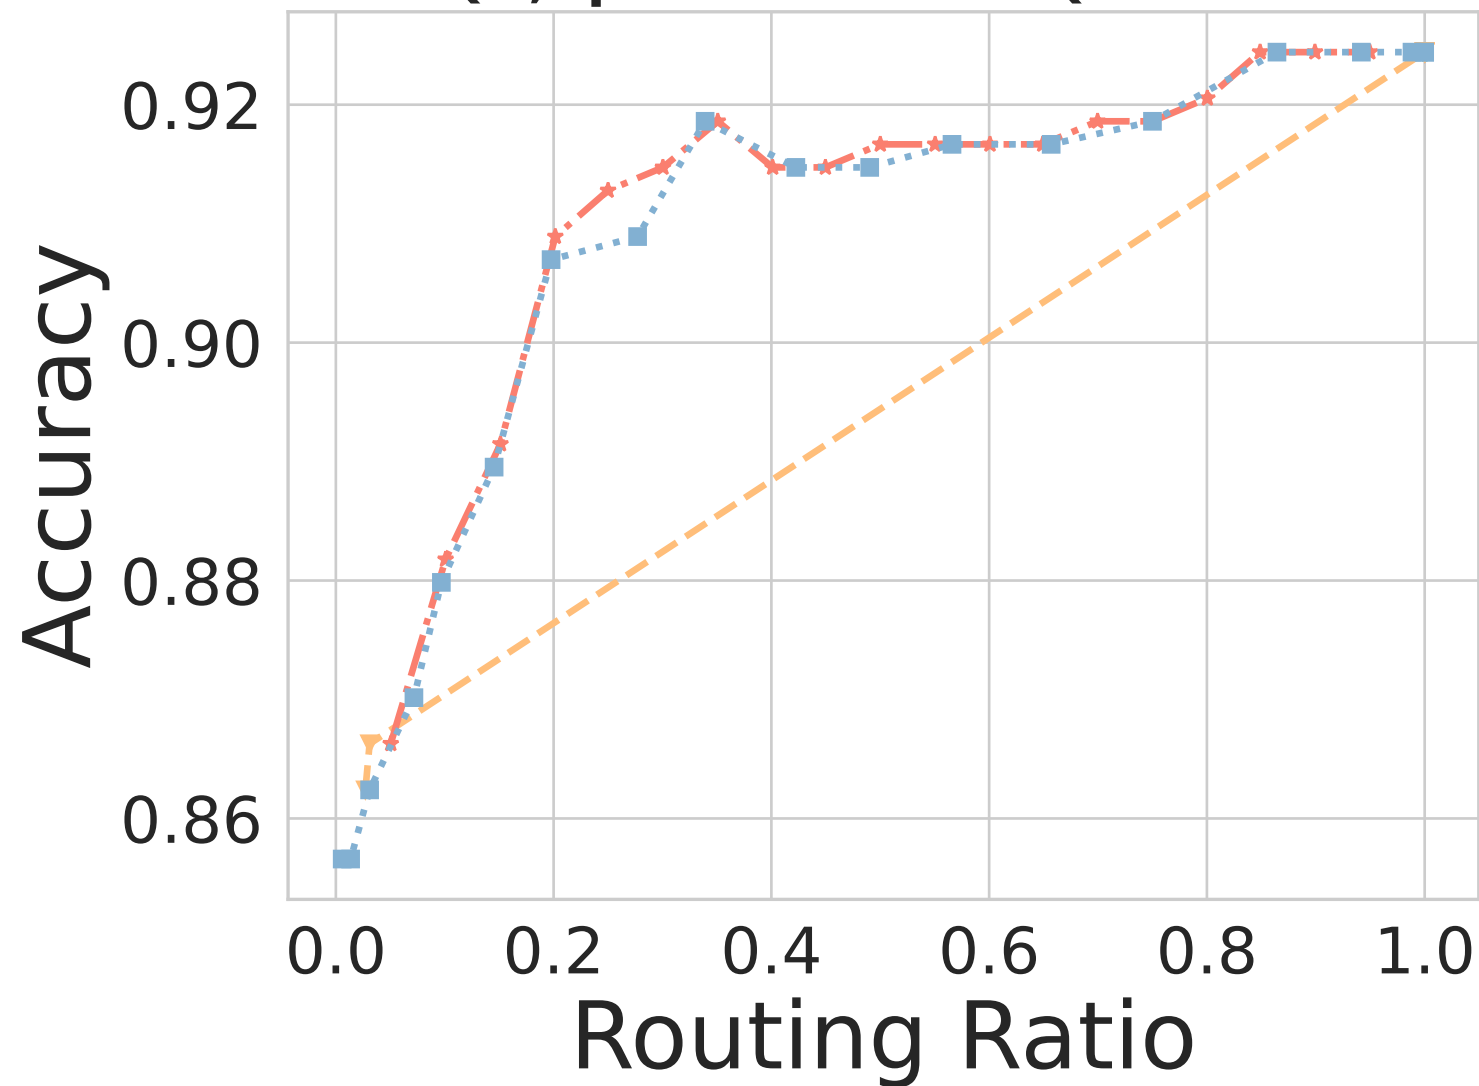

Supplement: supplementary_material [file cali_down_pi_qa_qwen-2.5-7b_Qwen_Qwen3-32B.pdf › Routing_SLM_LLMs/Proxy_routing_prediction/to_Qwen_Qwen3-32B/pi_qa_as_downstream/cali_down_pi_qa_qwen-2.5-7b_Qwen_Qwen3-32B.pdf]

**PIQA, rwkv to Qwen3-32B**

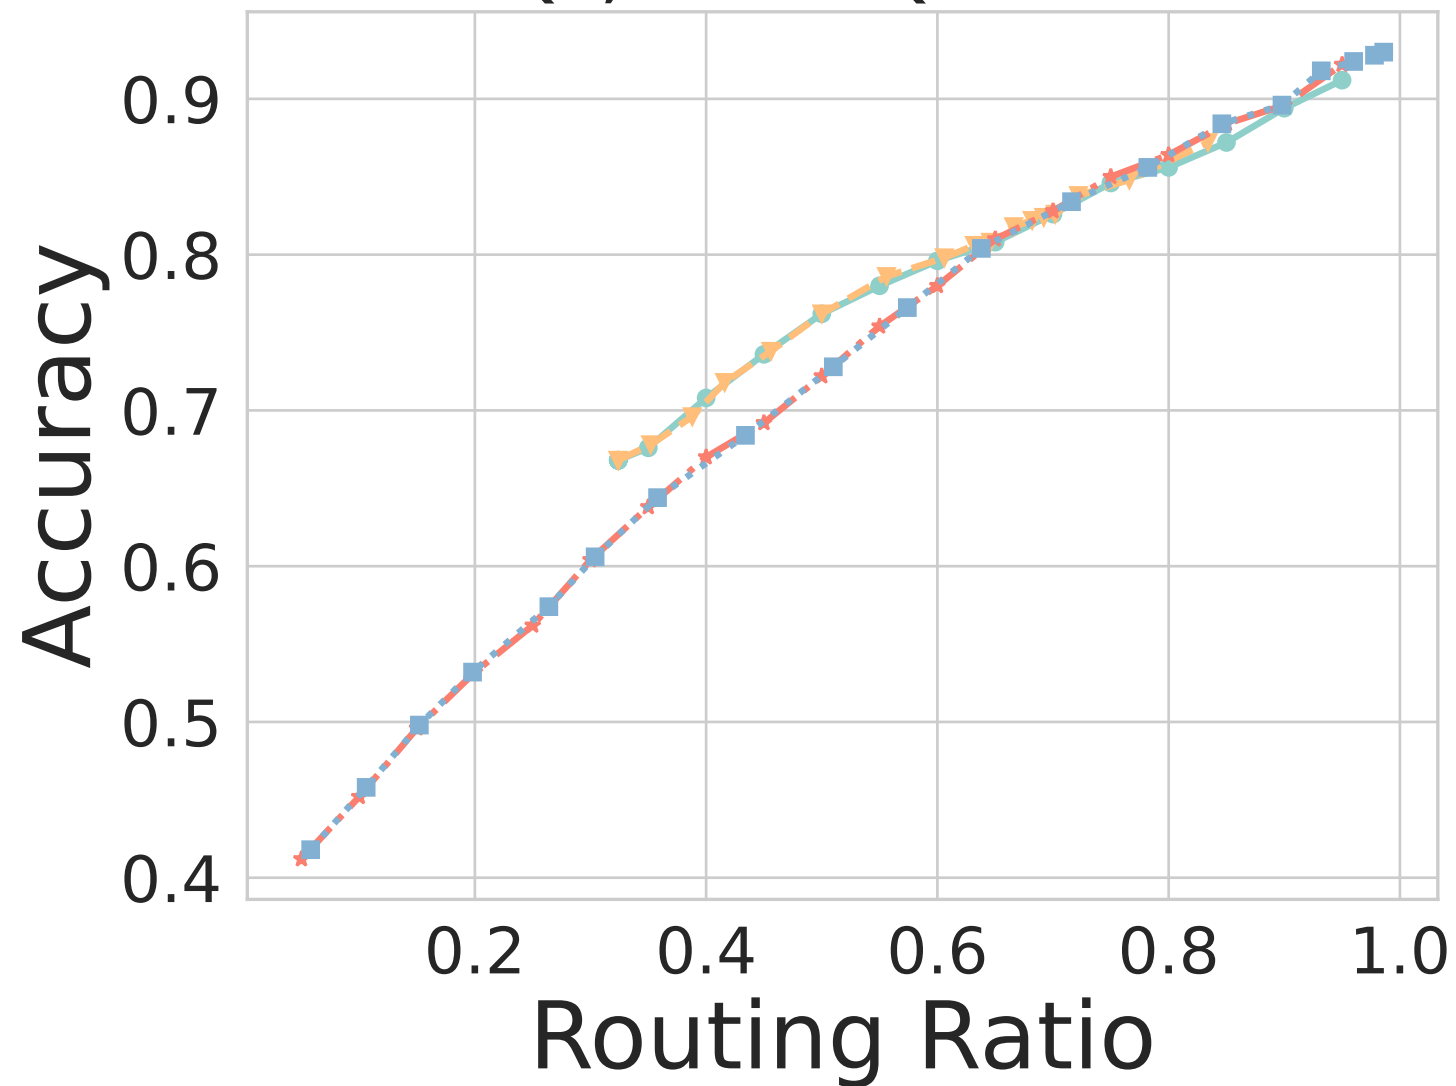

Supplement: supplementary_material [file cali_down_pi_qa_rwkv_Qwen_Qwen3-32B.pdf › Routing_SLM_LLMs/Proxy_routing_prediction/to_Qwen_Qwen3-32B/pi_qa_as_downstream/cali_down_pi_qa_rwkv_Qwen_Qwen3-32B.pdf]

**Social IQa, Qwen3-0.6B to Qwen3-32B**

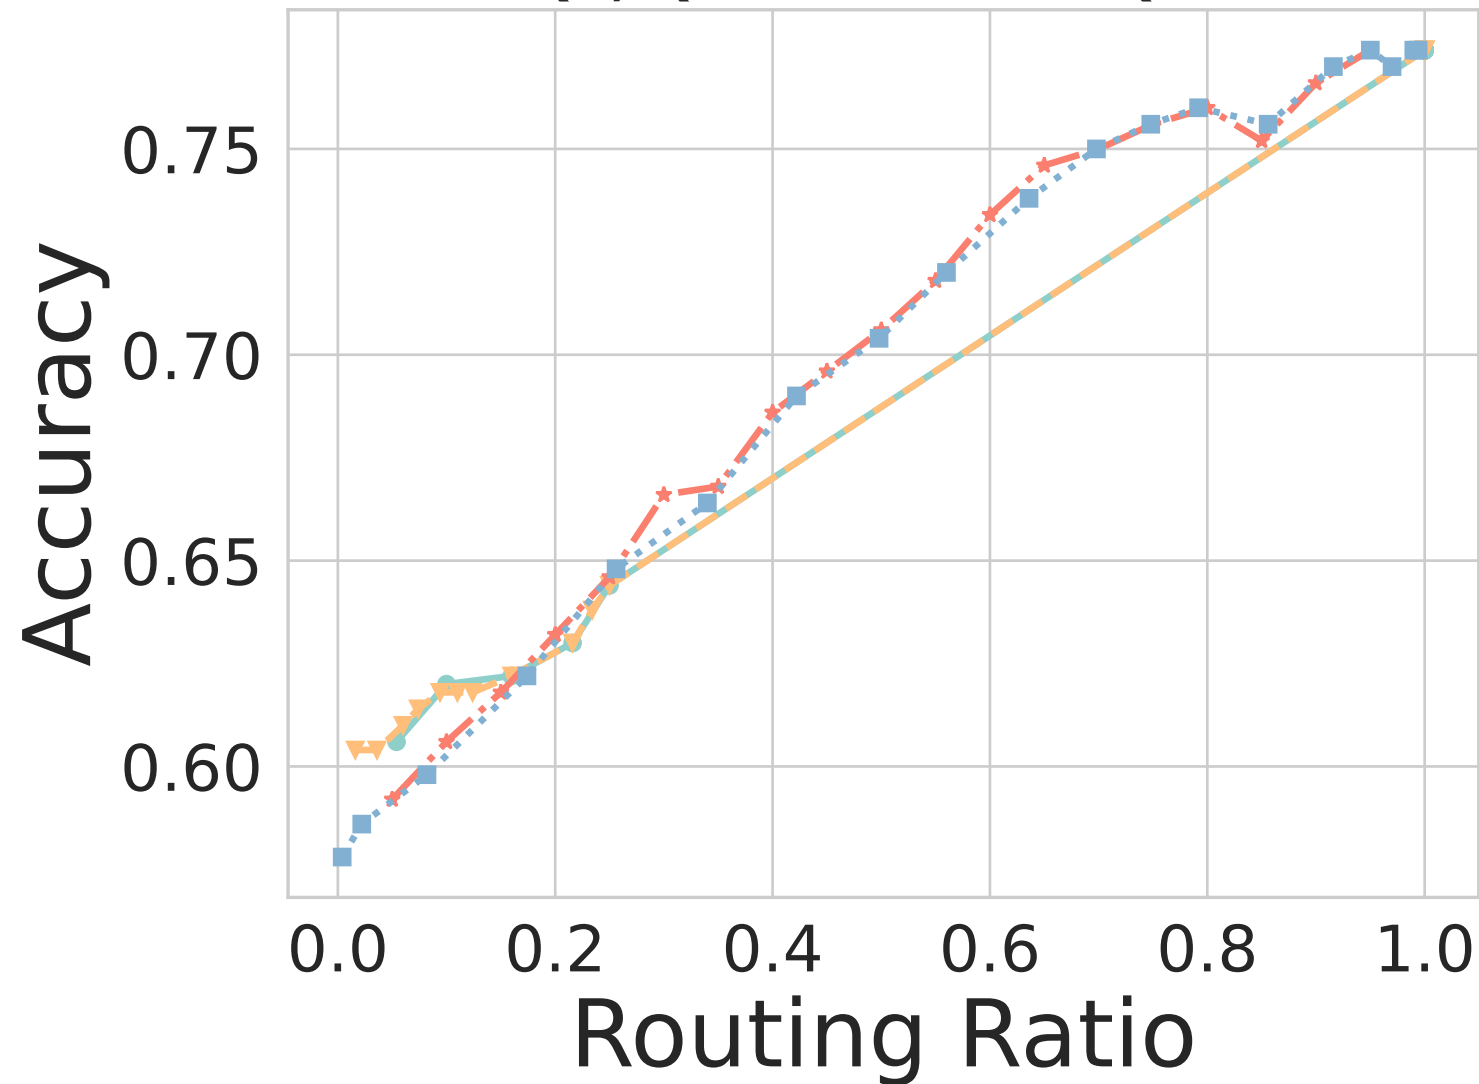

Supplement: supplementary_material [file cali_down_social_i_qa_Qwen3-0.6B_Qwen_Qwen3-32B.pdf › Routing_SLM_LLMs/Proxy_routing_prediction/to_Qwen_Qwen3-32B/social_i_qa_as_downstream/cali_down_social_i_qa_Qwen3-0.6B_Qwen_Qwen3-32B.pdf]

**Social IQa, Qwen3-1.7B to Qwen3-32B**

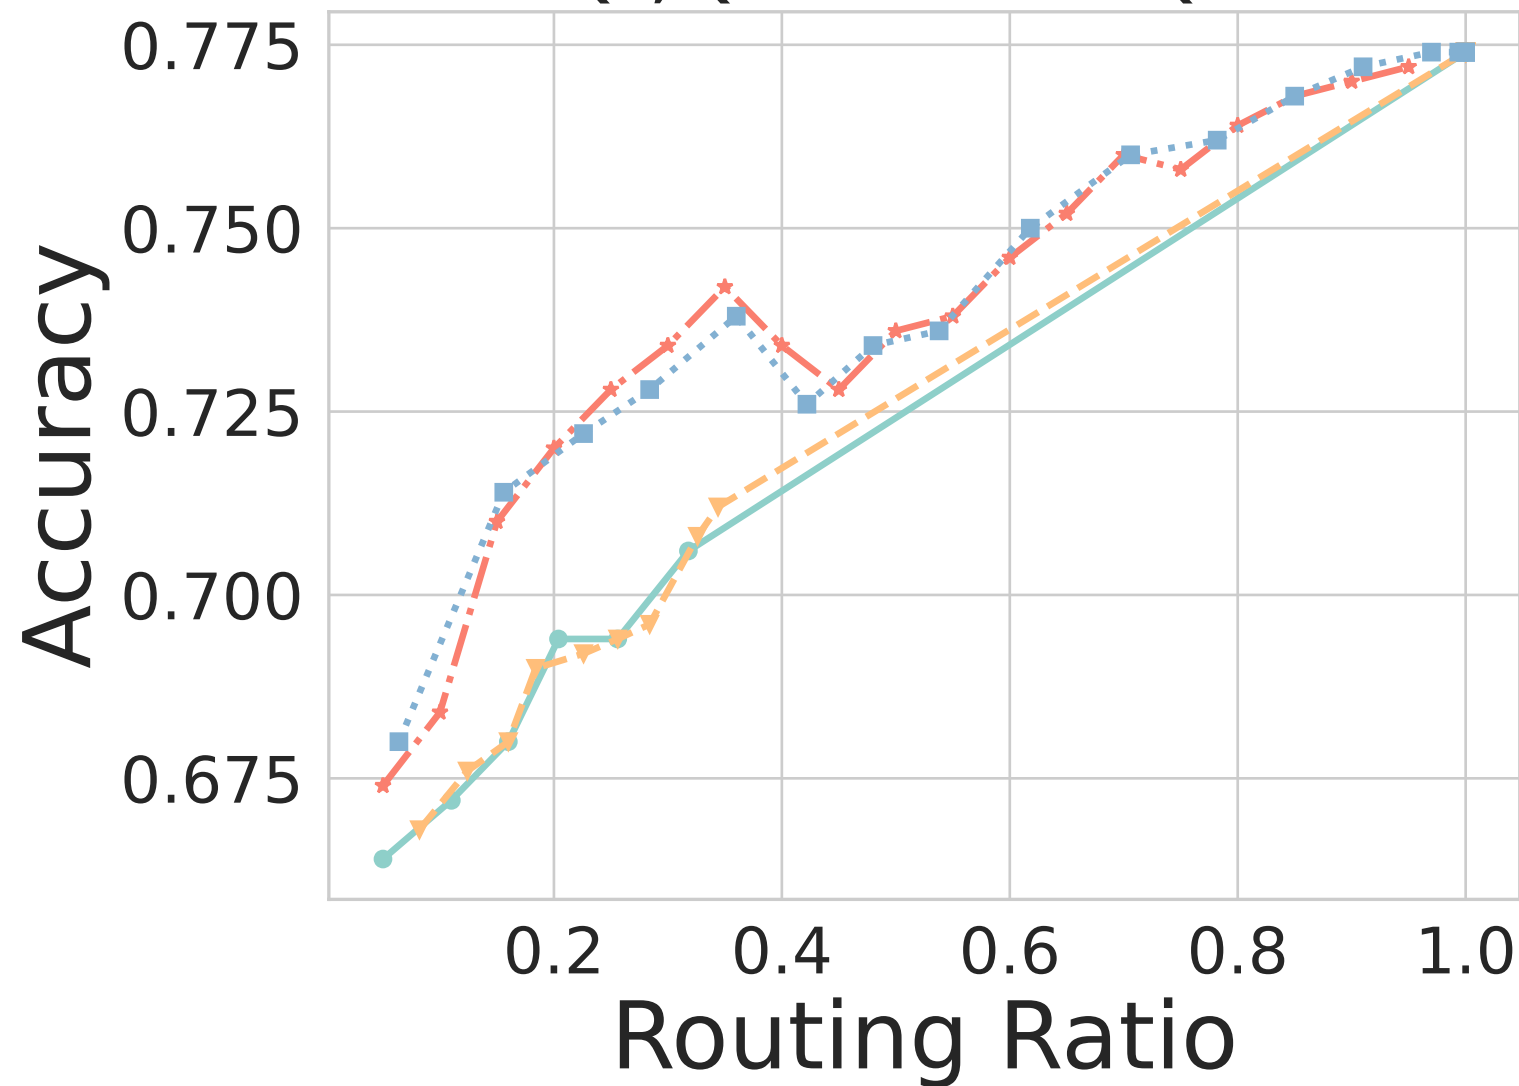

Supplement: supplementary_material [file cali_down_social_i_qa_Qwen3-1.7B_Qwen_Qwen3-32B.pdf › Routing_SLM_LLMs/Proxy_routing_prediction/to_Qwen_Qwen3-32B/social_i_qa_as_downstream/cali_down_social_i_qa_Qwen3-1.7B_Qwen_Qwen3-32B.pdf]

**Social IQa, Qwen3-4B to Qwen3-32B**

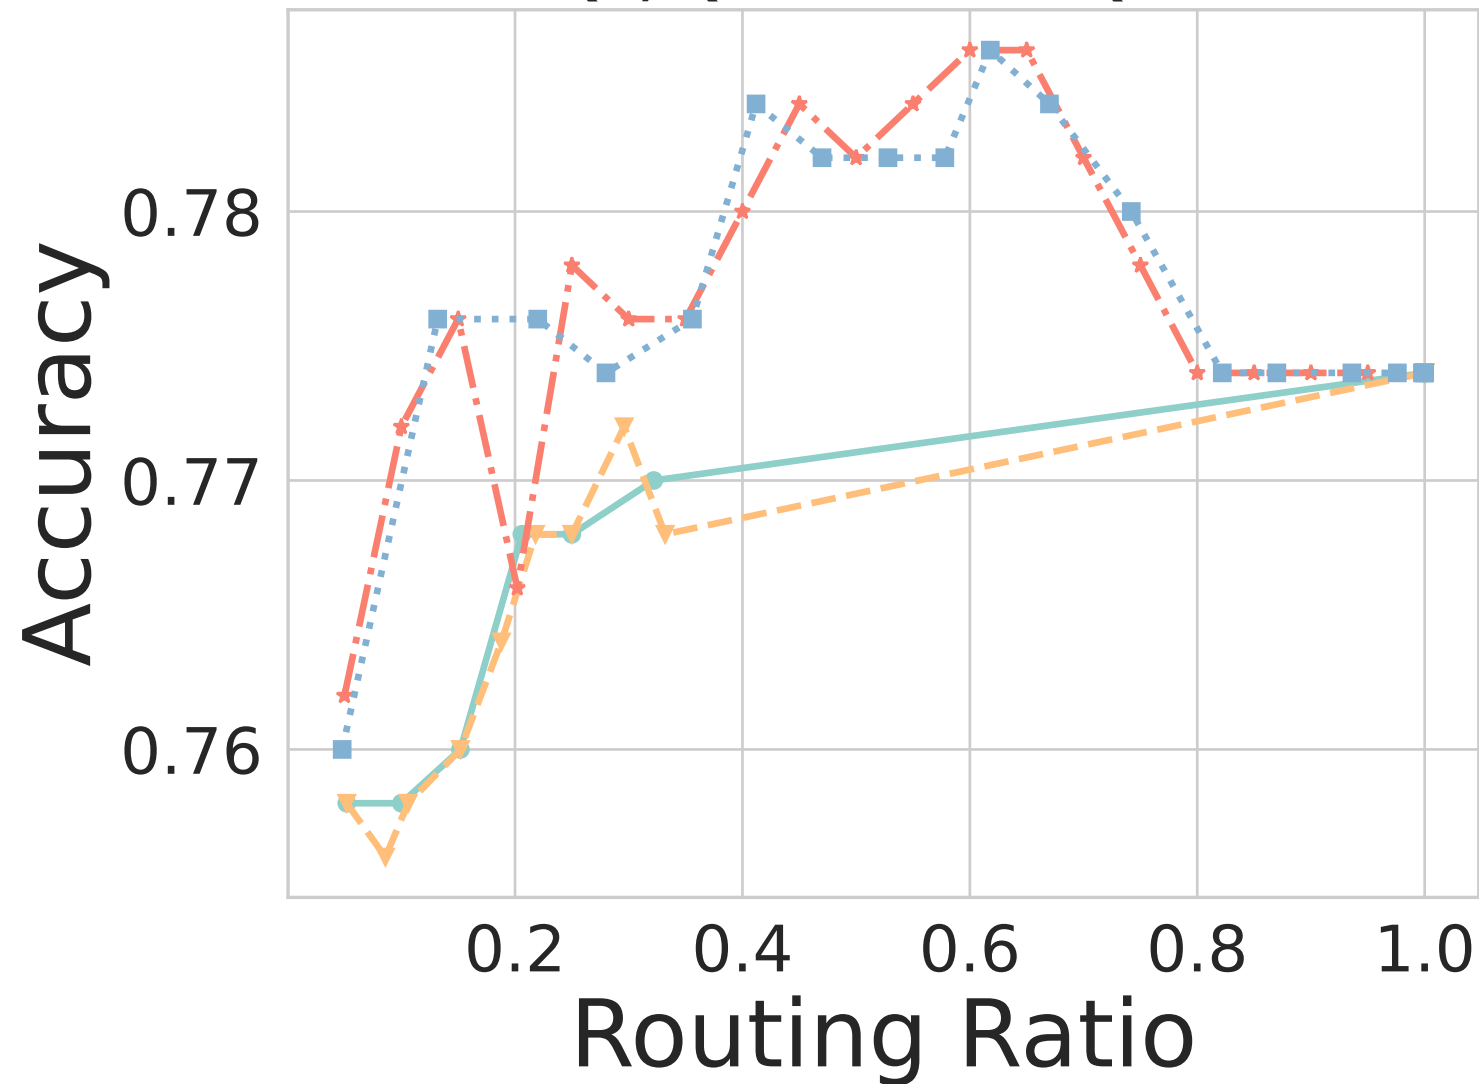

Supplement: supplementary_material [file cali_down_social_i_qa_Qwen3-4B_Qwen_Qwen3-32B.pdf › Routing_SLM_LLMs/Proxy_routing_prediction/to_Qwen_Qwen3-32B/social_i_qa_as_downstream/cali_down_social_i_qa_Qwen3-4B_Qwen_Qwen3-32B.pdf]

**Social IQa, granite-3.1-8b to Qwen3-32B**

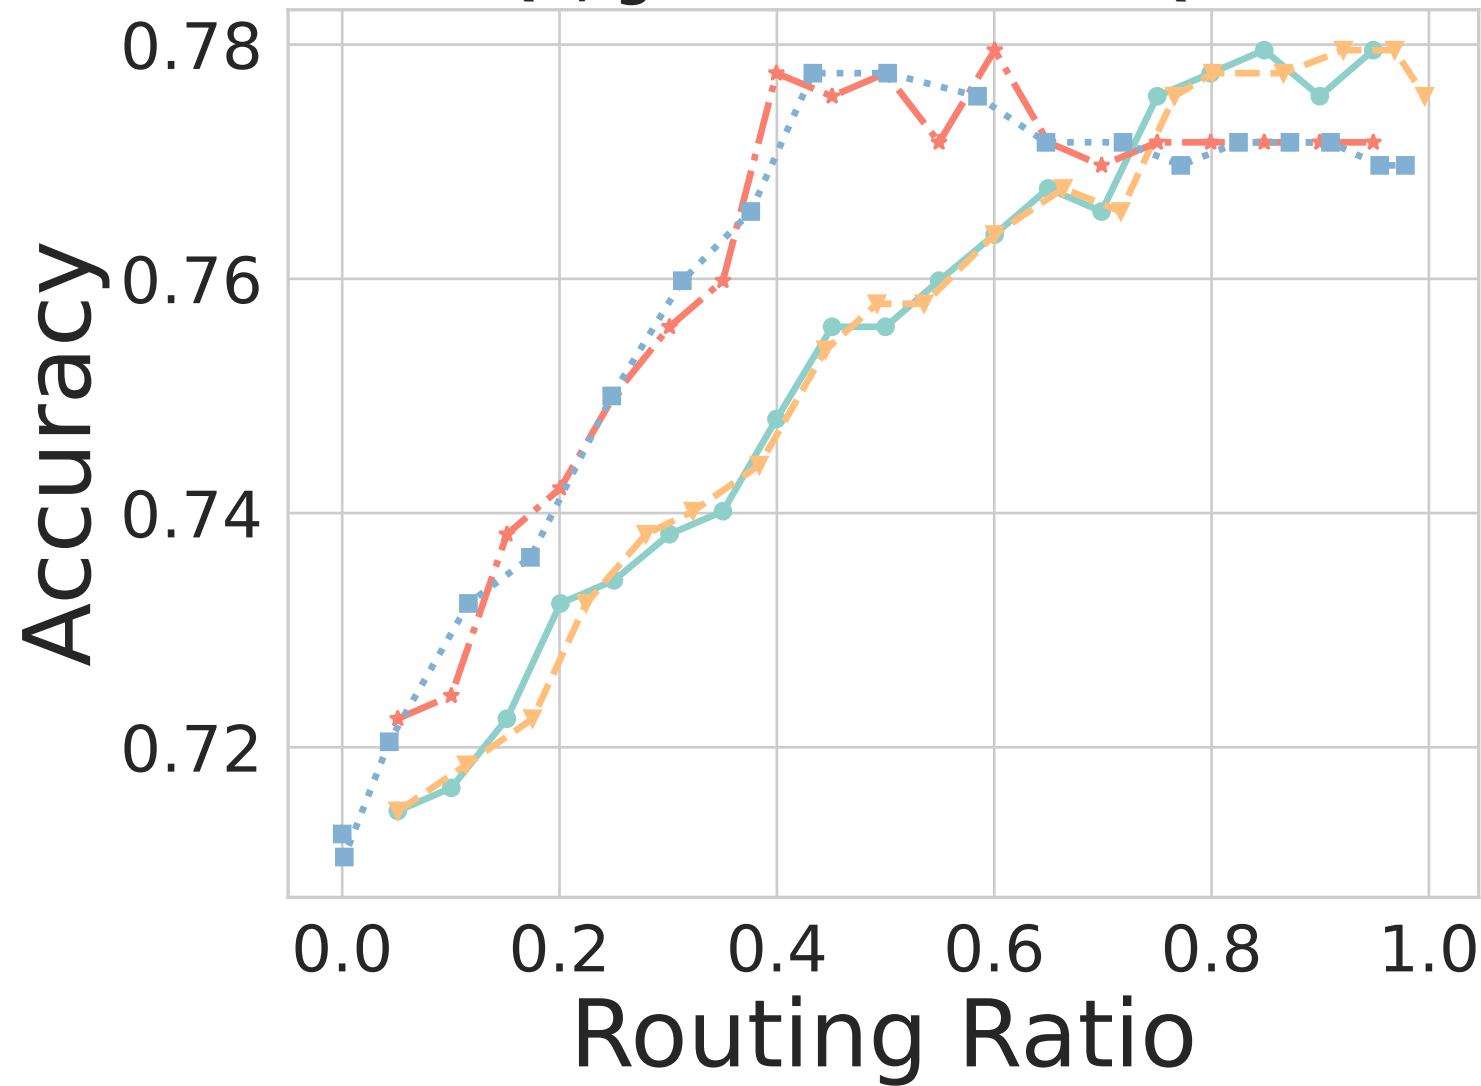

Supplement: supplementary_material [file cali_down_social_i_qa_granite-3.1-8b_Qwen_Qwen3-32B.pdf › Routing_SLM_LLMs/Proxy_routing_prediction/to_Qwen_Qwen3-32B/social_i_qa_as_downstream/cali_down_social_i_qa_granite-3.1-8b_Qwen_Qwen3-32B.pdf]

**Social IQa, llama-3.1-8b to Qwen3-32B**

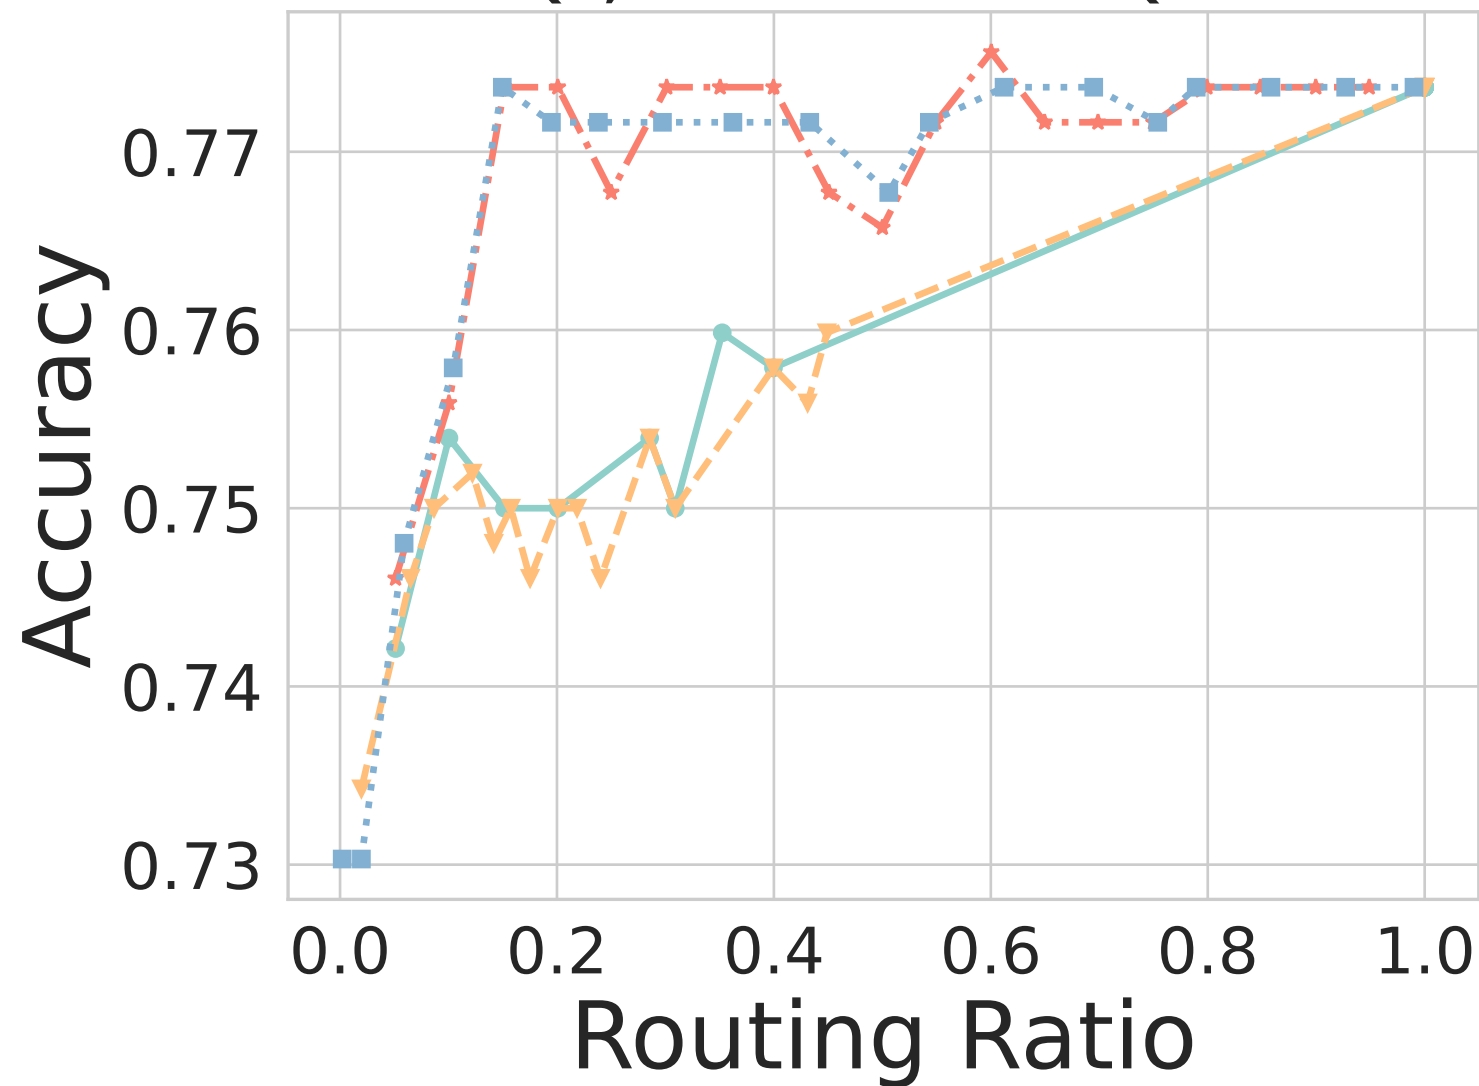

Supplement: supplementary_material [file cali_down_social_i_qa_llama-3.1-8b_Qwen_Qwen3-32B.pdf › Routing_SLM_LLMs/Proxy_routing_prediction/to_Qwen_Qwen3-32B/social_i_qa_as_downstream/cali_down_social_i_qa_llama-3.1-8b_Qwen_Qwen3-32B.pdf]

**Social IQa, llama-3.2-1b to Qwen3-32B**

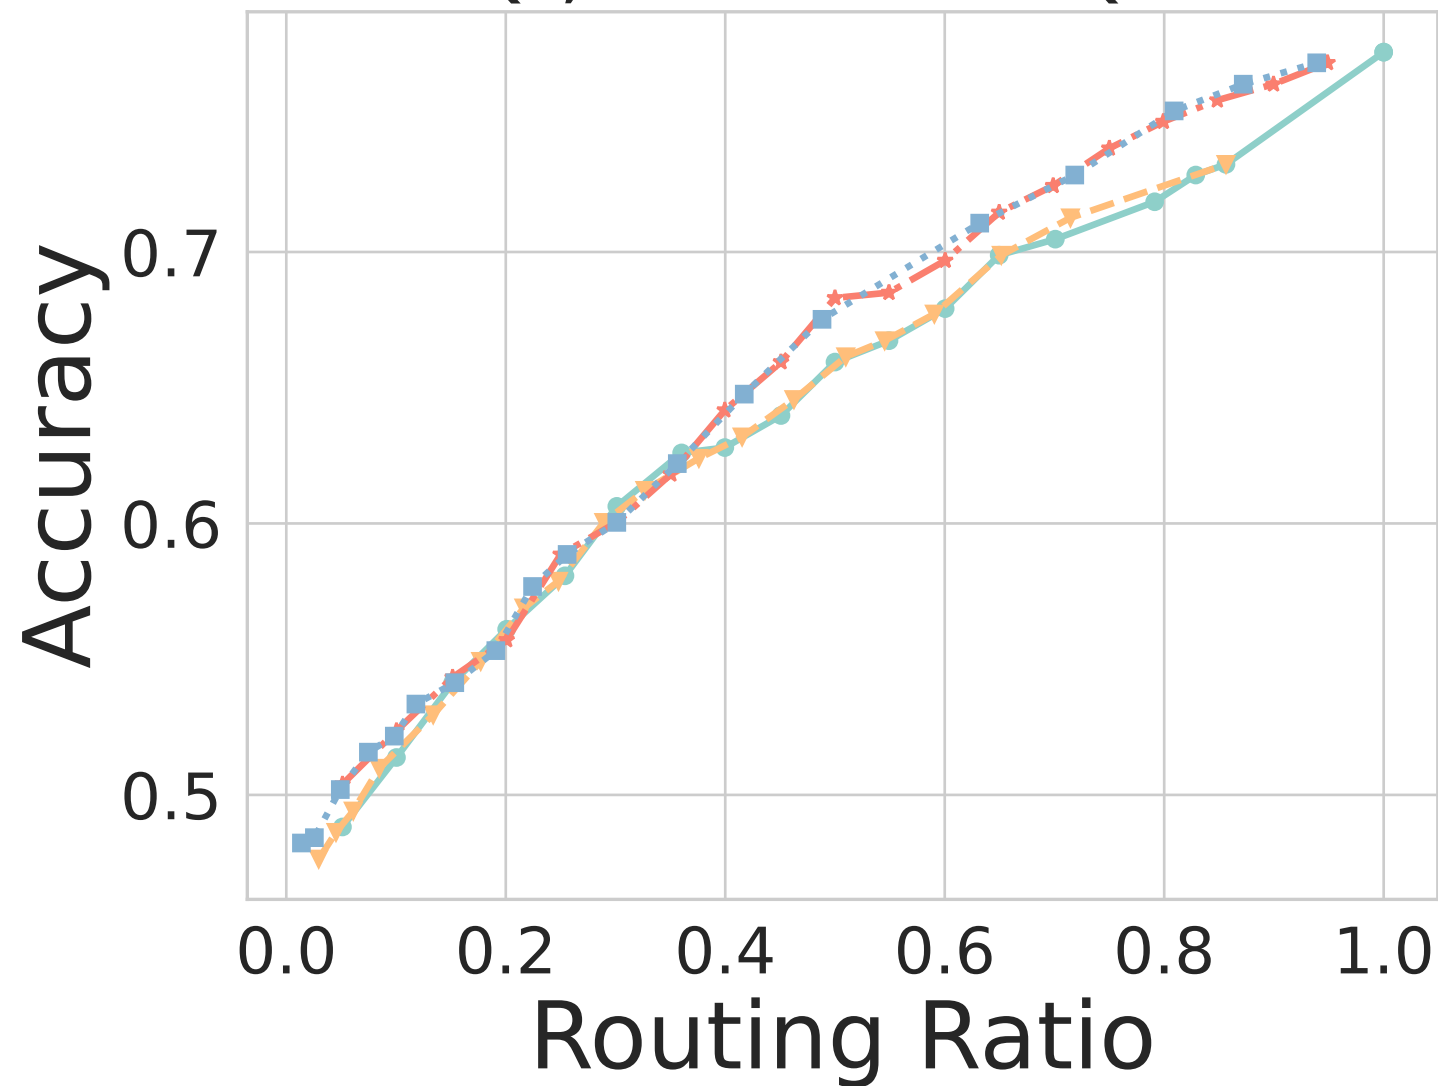

Supplement: supplementary_material [file cali_down_social_i_qa_llama-3.2-1b_Qwen_Qwen3-32B.pdf › Routing_SLM_LLMs/Proxy_routing_prediction/to_Qwen_Qwen3-32B/social_i_qa_as_downstream/cali_down_social_i_qa_llama-3.2-1b_Qwen_Qwen3-32B.pdf]

**Social IQa, llama-3.2-3b to Qwen3-32B**

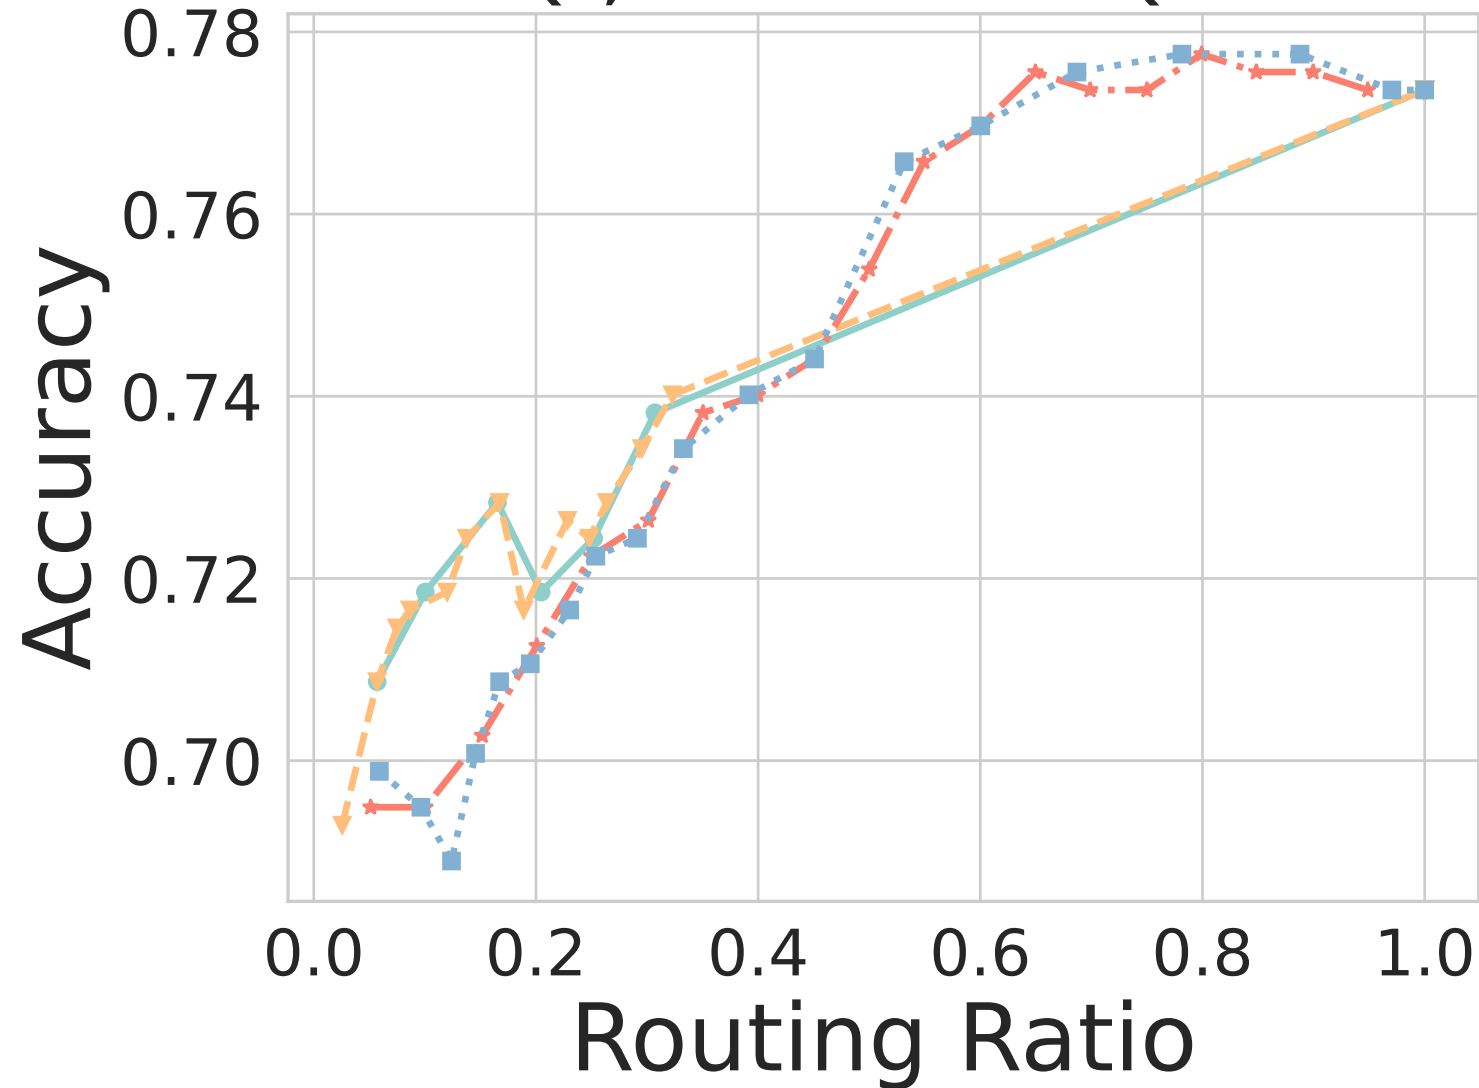

Supplement: supplementary_material [file cali_down_social_i_qa_llama-3.2-3b_Qwen_Qwen3-32B.pdf › Routing_SLM_LLMs/Proxy_routing_prediction/to_Qwen_Qwen3-32B/social_i_qa_as_downstream/cali_down_social_i_qa_llama-3.2-3b_Qwen_Qwen3-32B.pdf]

**Social IQa, mistral-7b to Qwen3-32B**

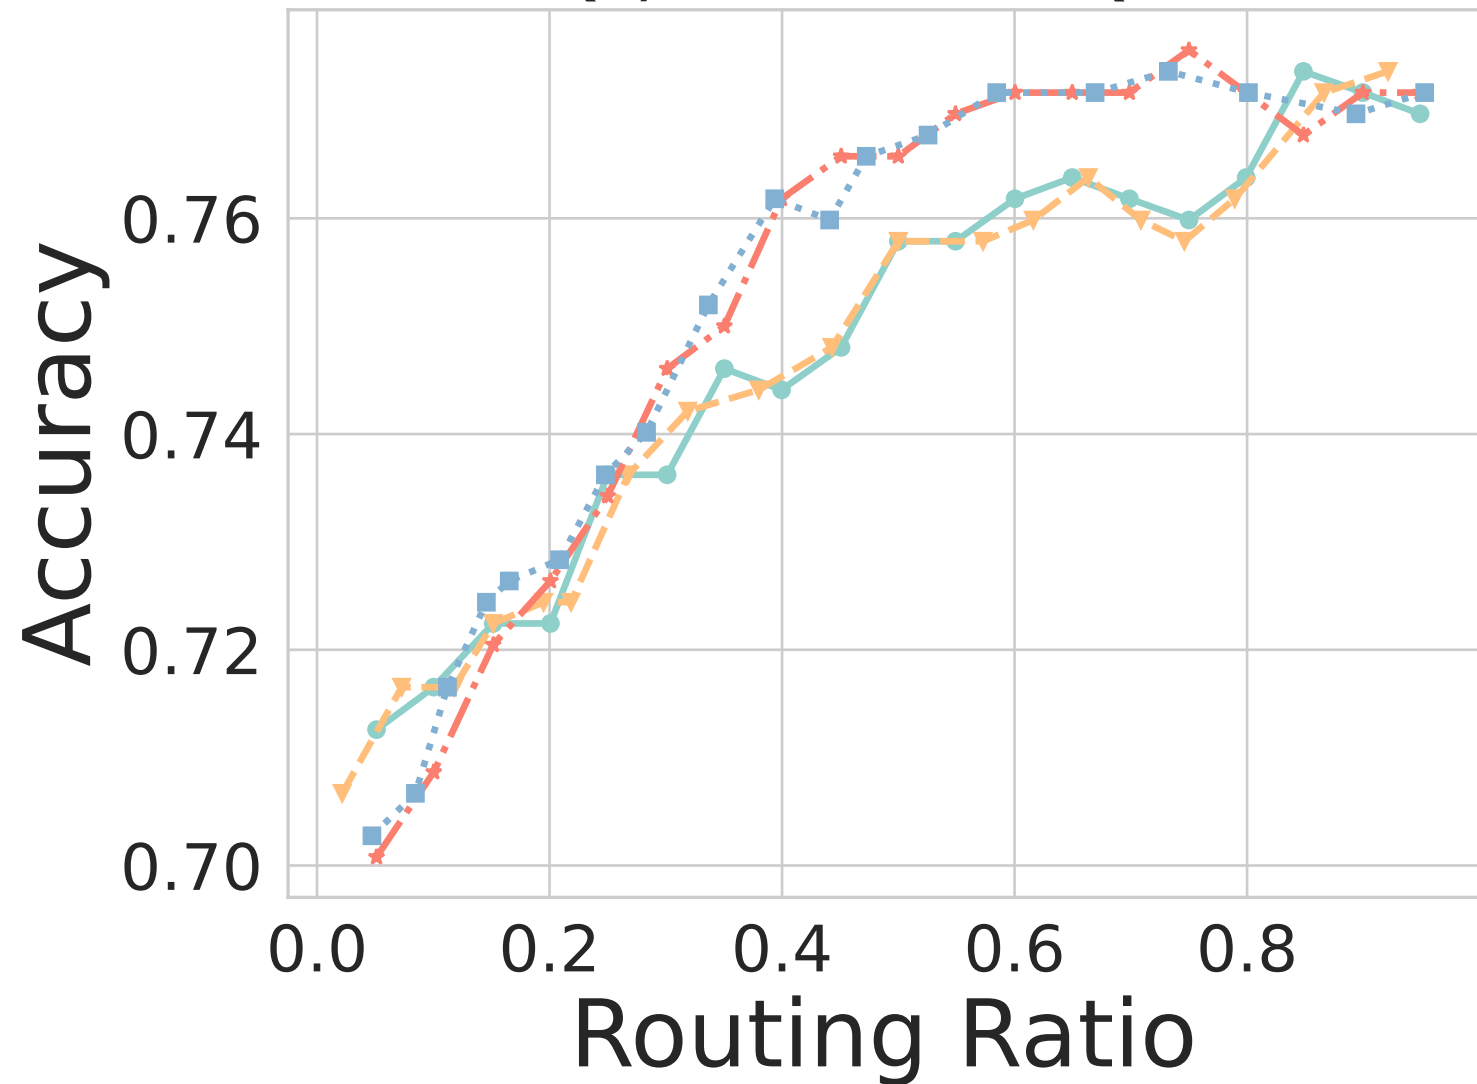

Supplement: supplementary_material [file cali_down_social_i_qa_mistral-7b_Qwen_Qwen3-32B.pdf › Routing_SLM_LLMs/Proxy_routing_prediction/to_Qwen_Qwen3-32B/social_i_qa_as_downstream/cali_down_social_i_qa_mistral-7b_Qwen_Qwen3-32B.pdf]

**Social IQa, phi-3.5-mini to Qwen3-32B**

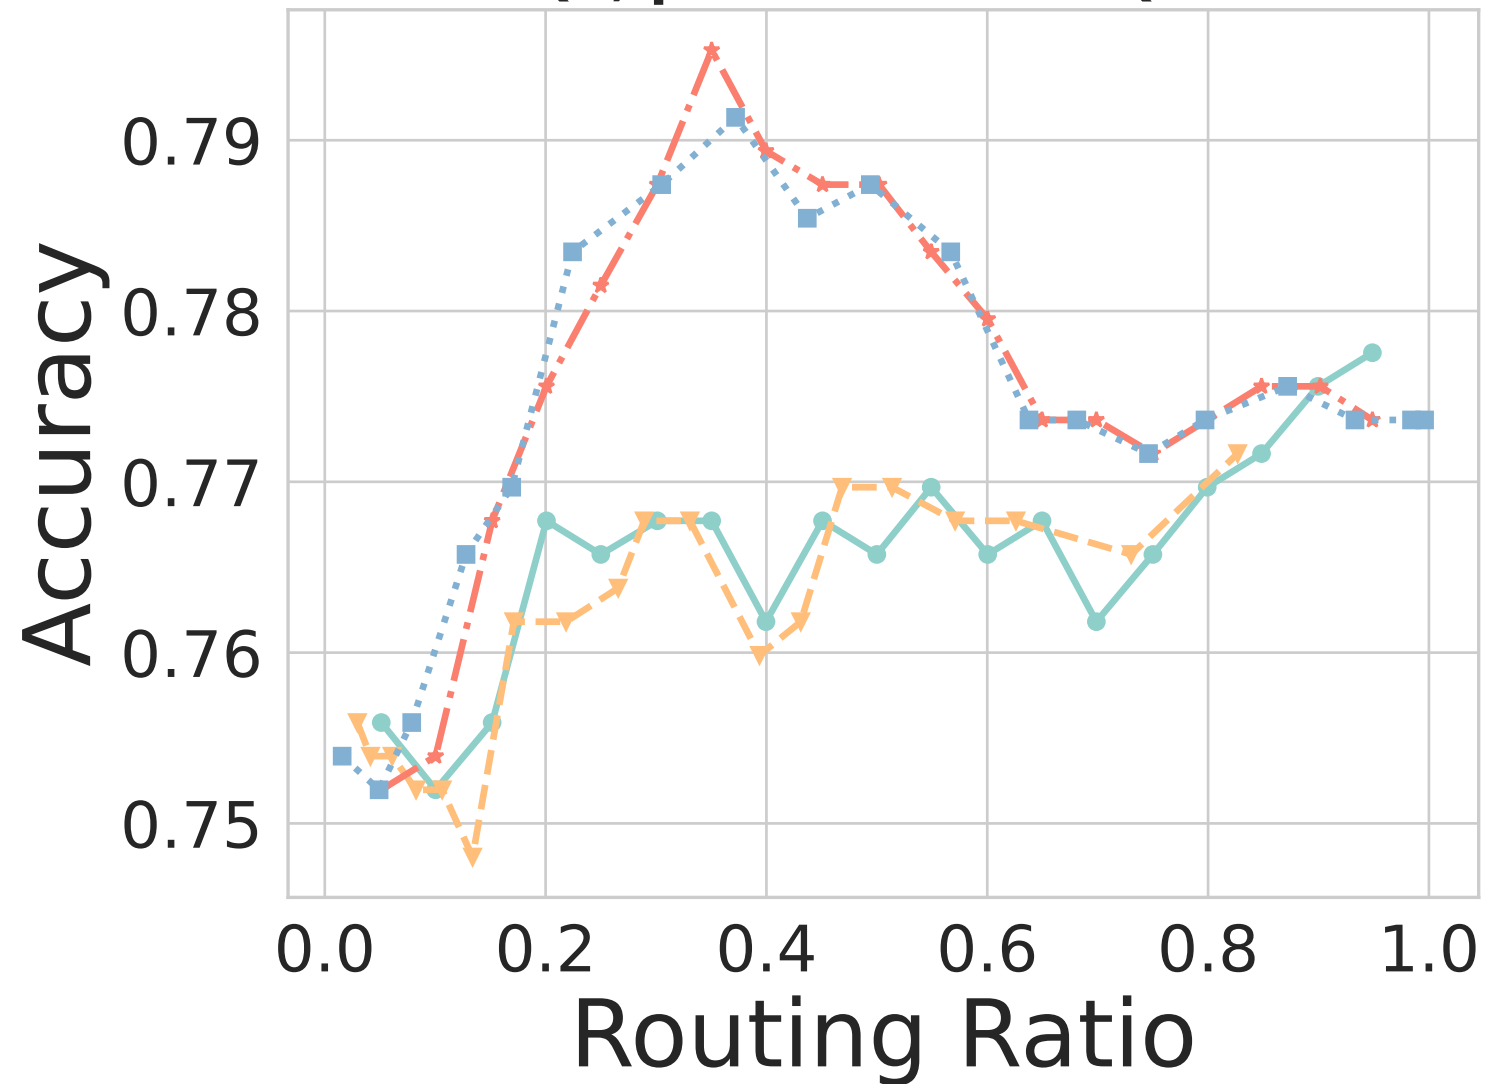

Supplement: supplementary_material [file cali_down_social_i_qa_phi-3.5-mini_Qwen_Qwen3-32B.pdf › Routing_SLM_LLMs/Proxy_routing_prediction/to_Qwen_Qwen3-32B/social_i_qa_as_downstream/cali_down_social_i_qa_phi-3.5-mini_Qwen_Qwen3-32B.pdf]

**Social IQa, phi-4-mini-reasoning to Qwen3-32B**

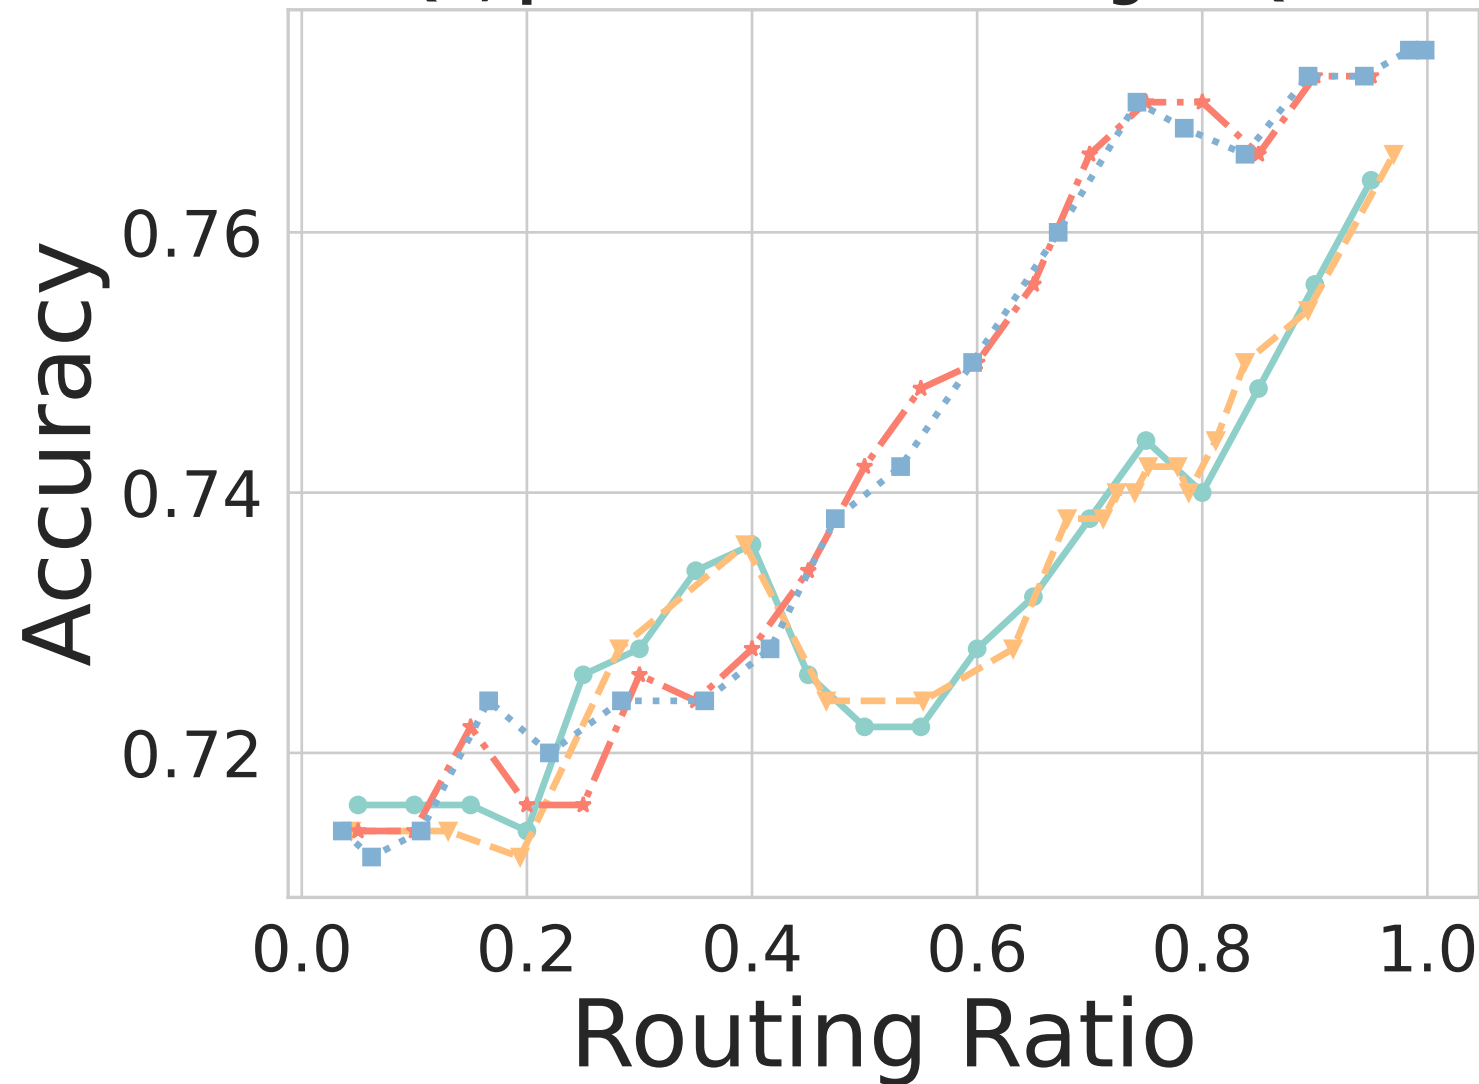

Supplement: supplementary_material [file cali_down_social_i_qa_phi-4-mini-reasoning_Qwen_Qwen3-32B.pdf › Routing_SLM_LLMs/Proxy_routing_prediction/to_Qwen_Qwen3-32B/social_i_qa_as_downstream/cali_down_social_i_qa_phi-4-mini-reasoning_Qwen_Qwen3-32B.pdf]

**Social IQa, qwen-2.5-7b to Qwen3-32B**

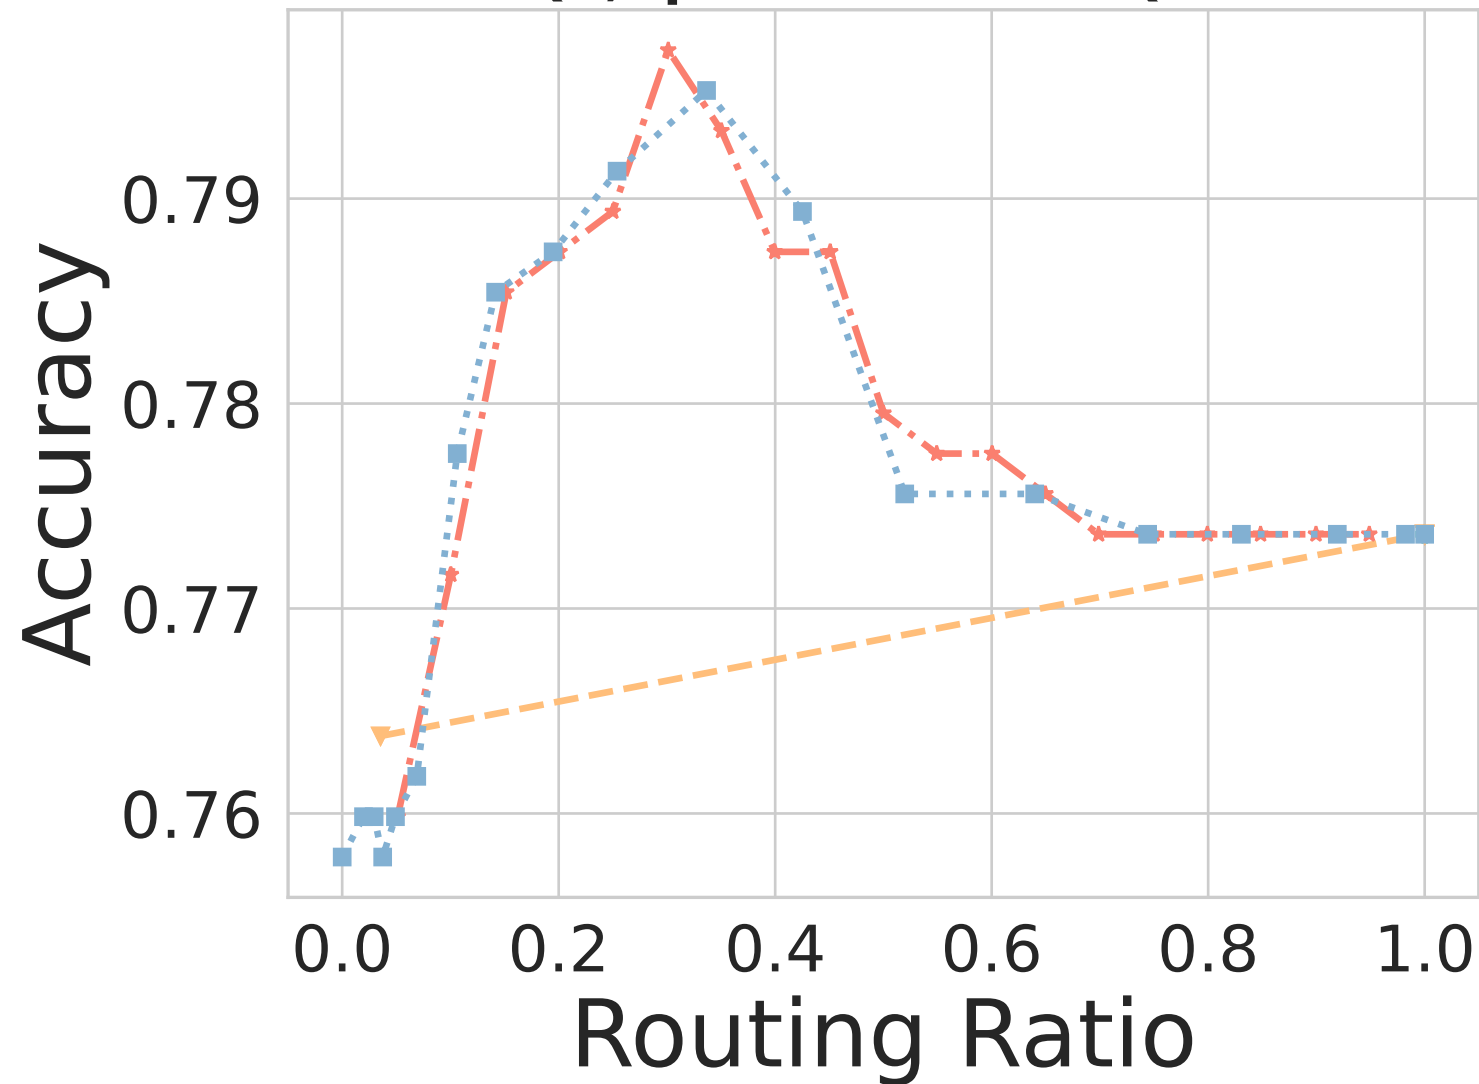

Supplement: supplementary_material [file cali_down_social_i_qa_qwen-2.5-7b_Qwen_Qwen3-32B.pdf › Routing_SLM_LLMs/Proxy_routing_prediction/to_Qwen_Qwen3-32B/social_i_qa_as_downstream/cali_down_social_i_qa_qwen-2.5-7b_Qwen_Qwen3-32B.pdf]

**Social IQa, rwkv to Qwen3-32B**

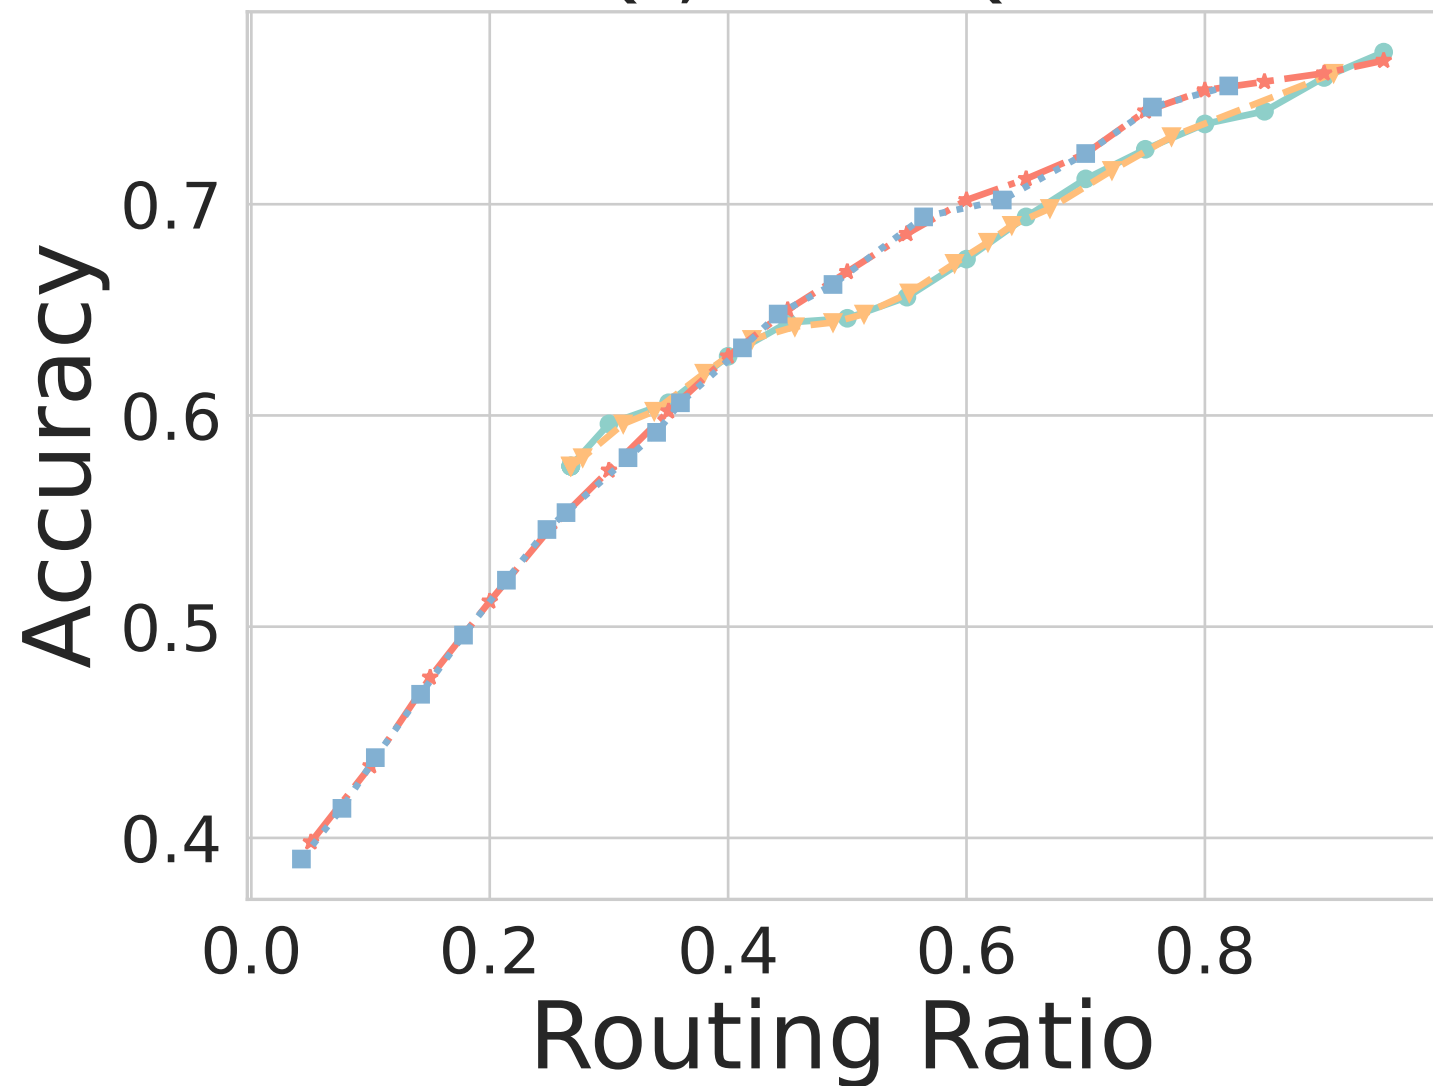

Supplement: supplementary_material [file cali_down_social_i_qa_rwkv_Qwen_Qwen3-32B.pdf › Routing_SLM_LLMs/Proxy_routing_prediction/to_Qwen_Qwen3-32B/social_i_qa_as_downstream/cali_down_social_i_qa_rwkv_Qwen_Qwen3-32B.pdf]

**SVAMP, Qwen3-0.6B to Qwen3-32B**

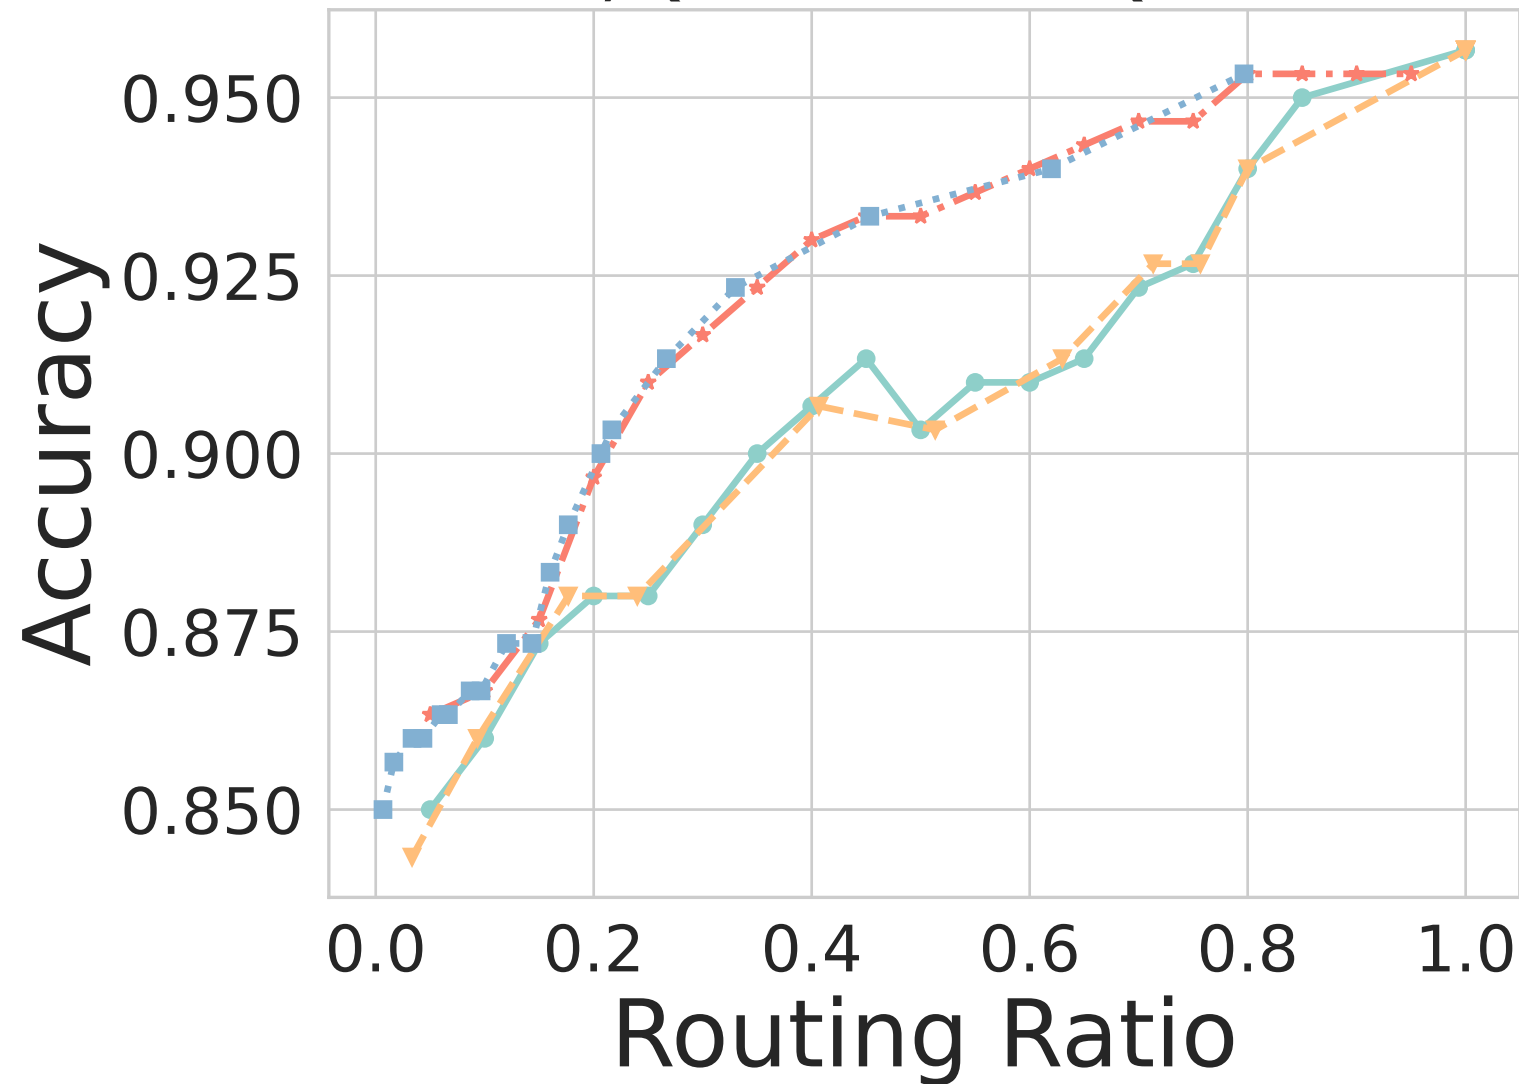

Supplement: supplementary_material [file cali_down_svamp_Qwen3-0.6B_Qwen_Qwen3-32B.pdf › Routing_SLM_LLMs/Proxy_routing_prediction/to_Qwen_Qwen3-32B/svamp_as_downstream/cali_down_svamp_Qwen3-0.6B_Qwen_Qwen3-32B.pdf]

**SVAMP, Qwen3-1.7B to Qwen3-32B**

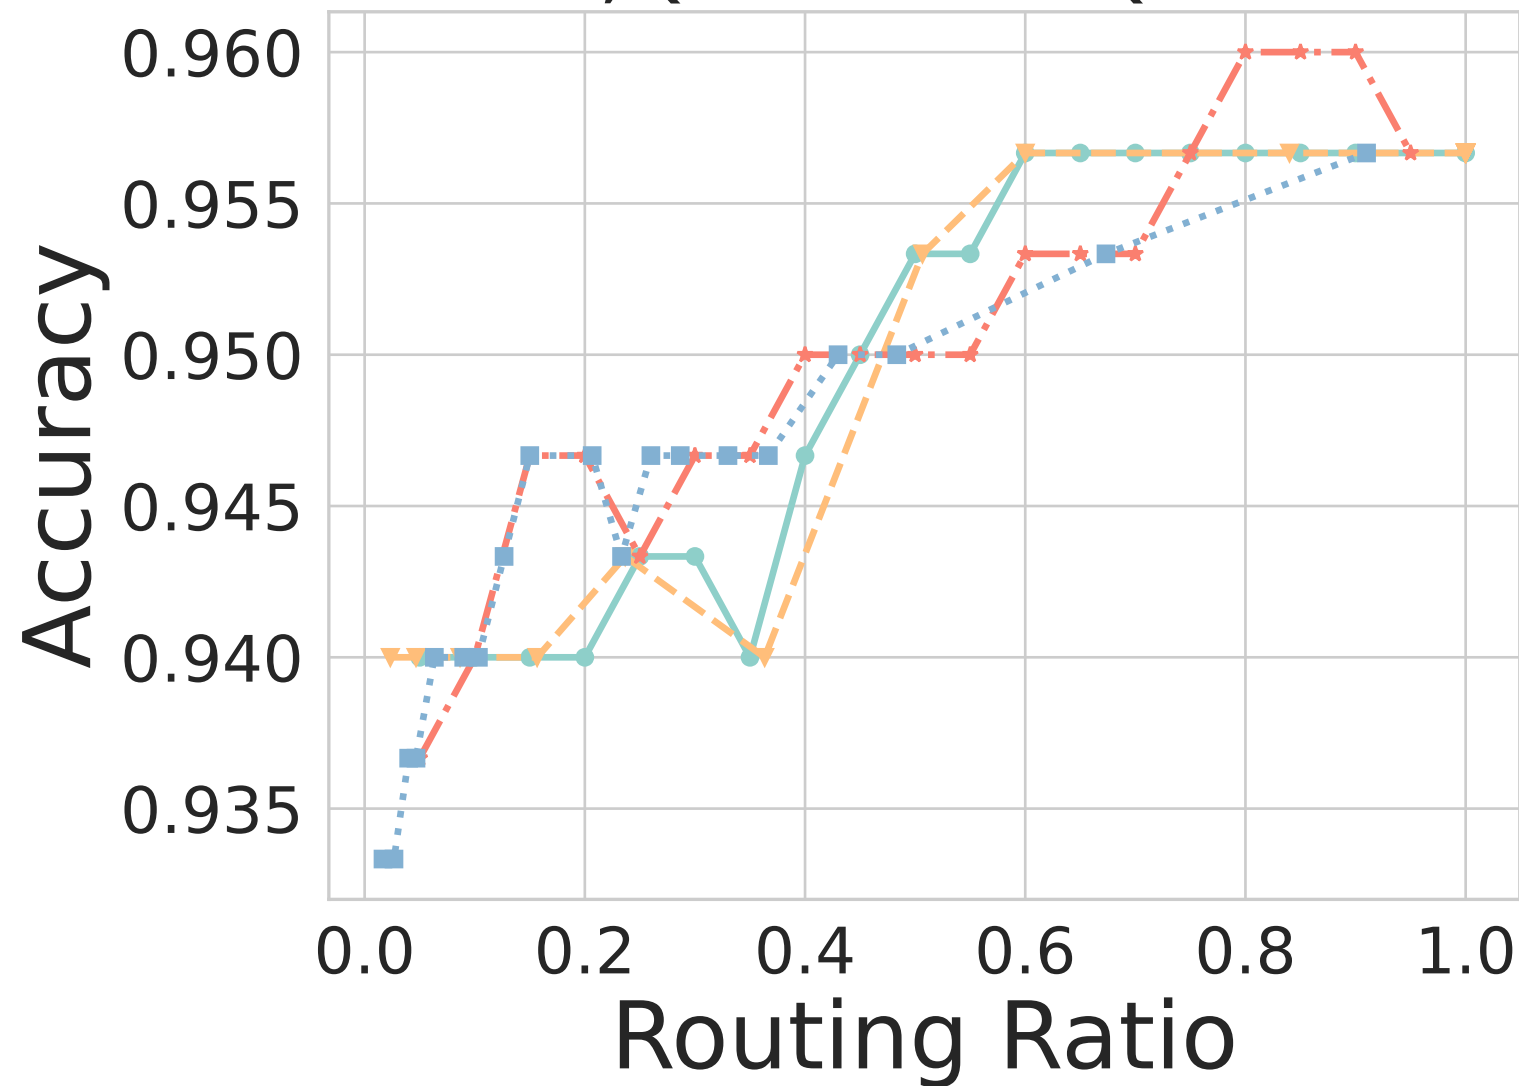

Supplement: supplementary_material [file cali_down_svamp_Qwen3-1.7B_Qwen_Qwen3-32B.pdf › Routing_SLM_LLMs/Proxy_routing_prediction/to_Qwen_Qwen3-32B/svamp_as_downstream/cali_down_svamp_Qwen3-1.7B_Qwen_Qwen3-32B.pdf]

**SVAMP, Qwen3-4B to Qwen3-32B**

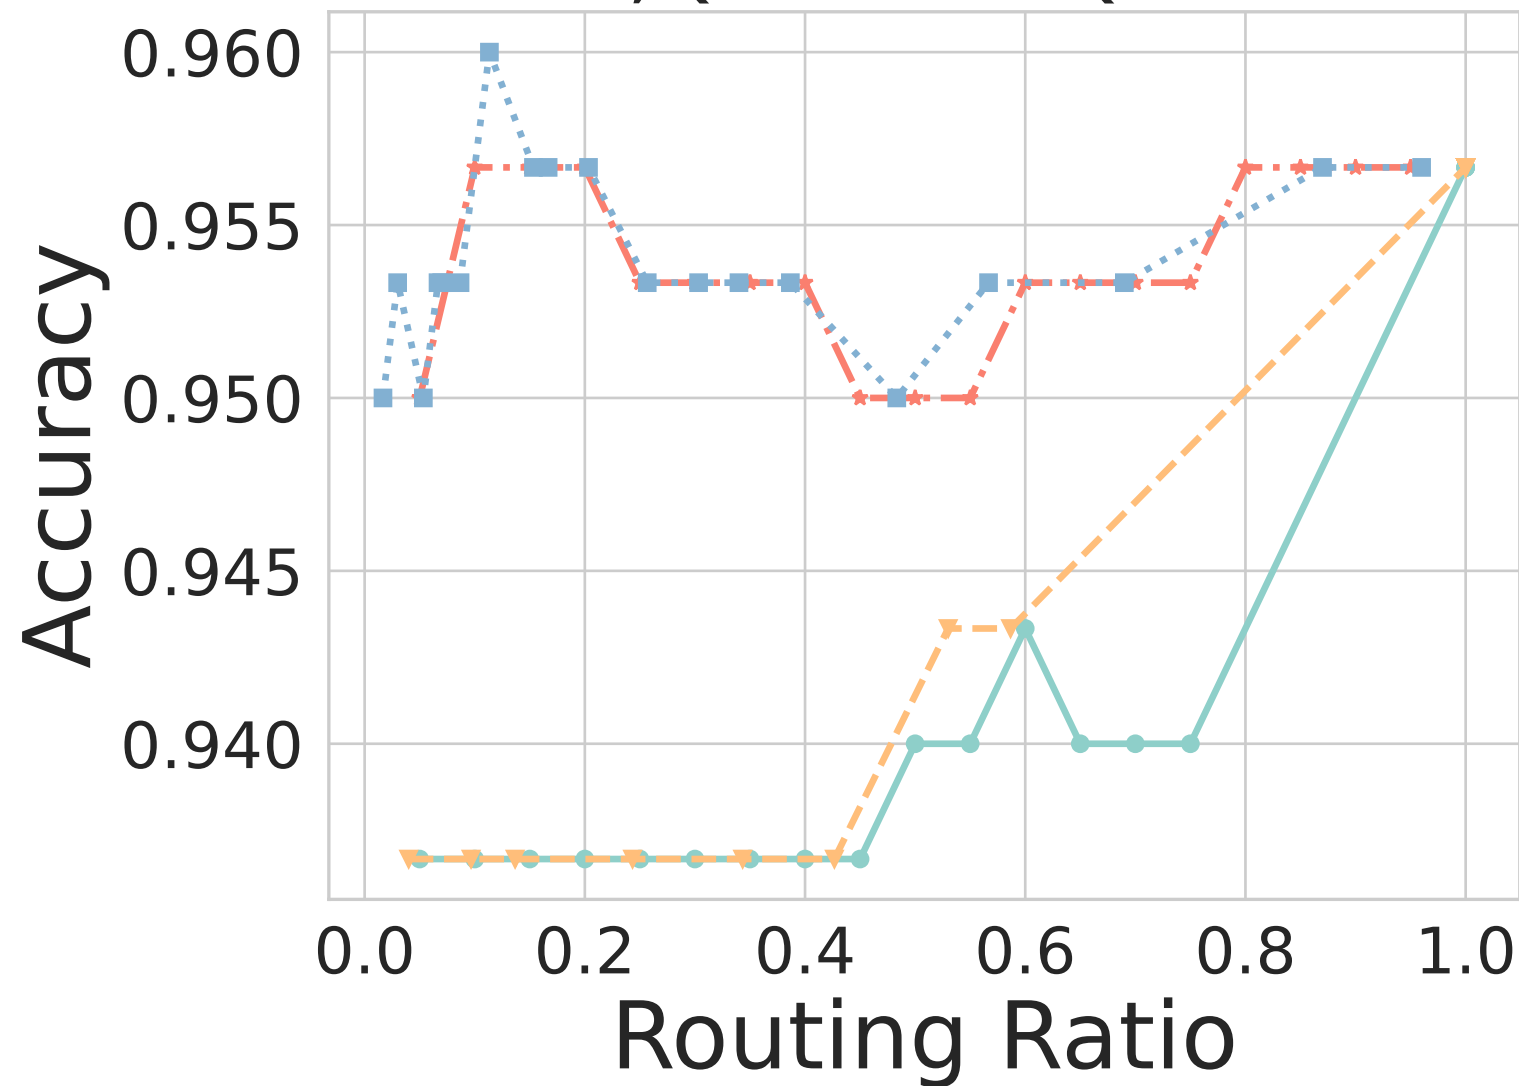

Supplement: supplementary_material [file cali_down_svamp_Qwen3-4B_Qwen_Qwen3-32B.pdf › Routing_SLM_LLMs/Proxy_routing_prediction/to_Qwen_Qwen3-32B/svamp_as_downstream/cali_down_svamp_Qwen3-4B_Qwen_Qwen3-32B.pdf]

**SVAMP, granite-3.1-8b to Qwen3-32B**

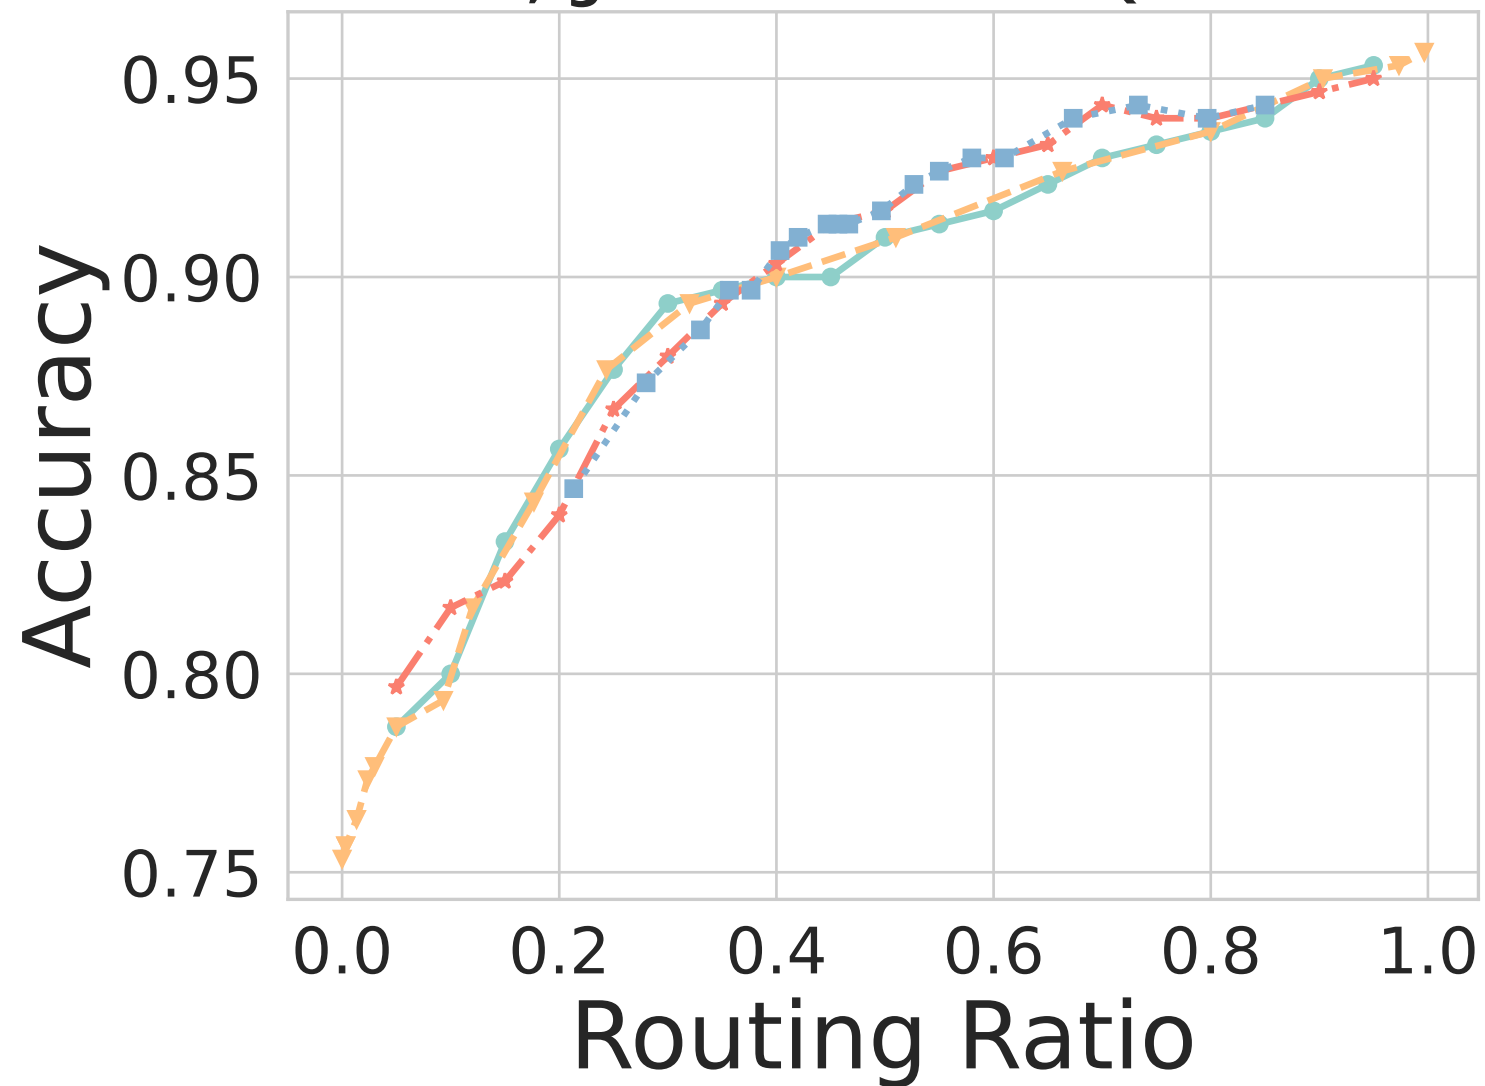

Supplement: supplementary_material [file cali_down_svamp_granite-3.1-8b_Qwen_Qwen3-32B.pdf › Routing_SLM_LLMs/Proxy_routing_prediction/to_Qwen_Qwen3-32B/svamp_as_downstream/cali_down_svamp_granite-3.1-8b_Qwen_Qwen3-32B.pdf]

**SVAMP, llama-3.1-8b to Qwen3-32B**

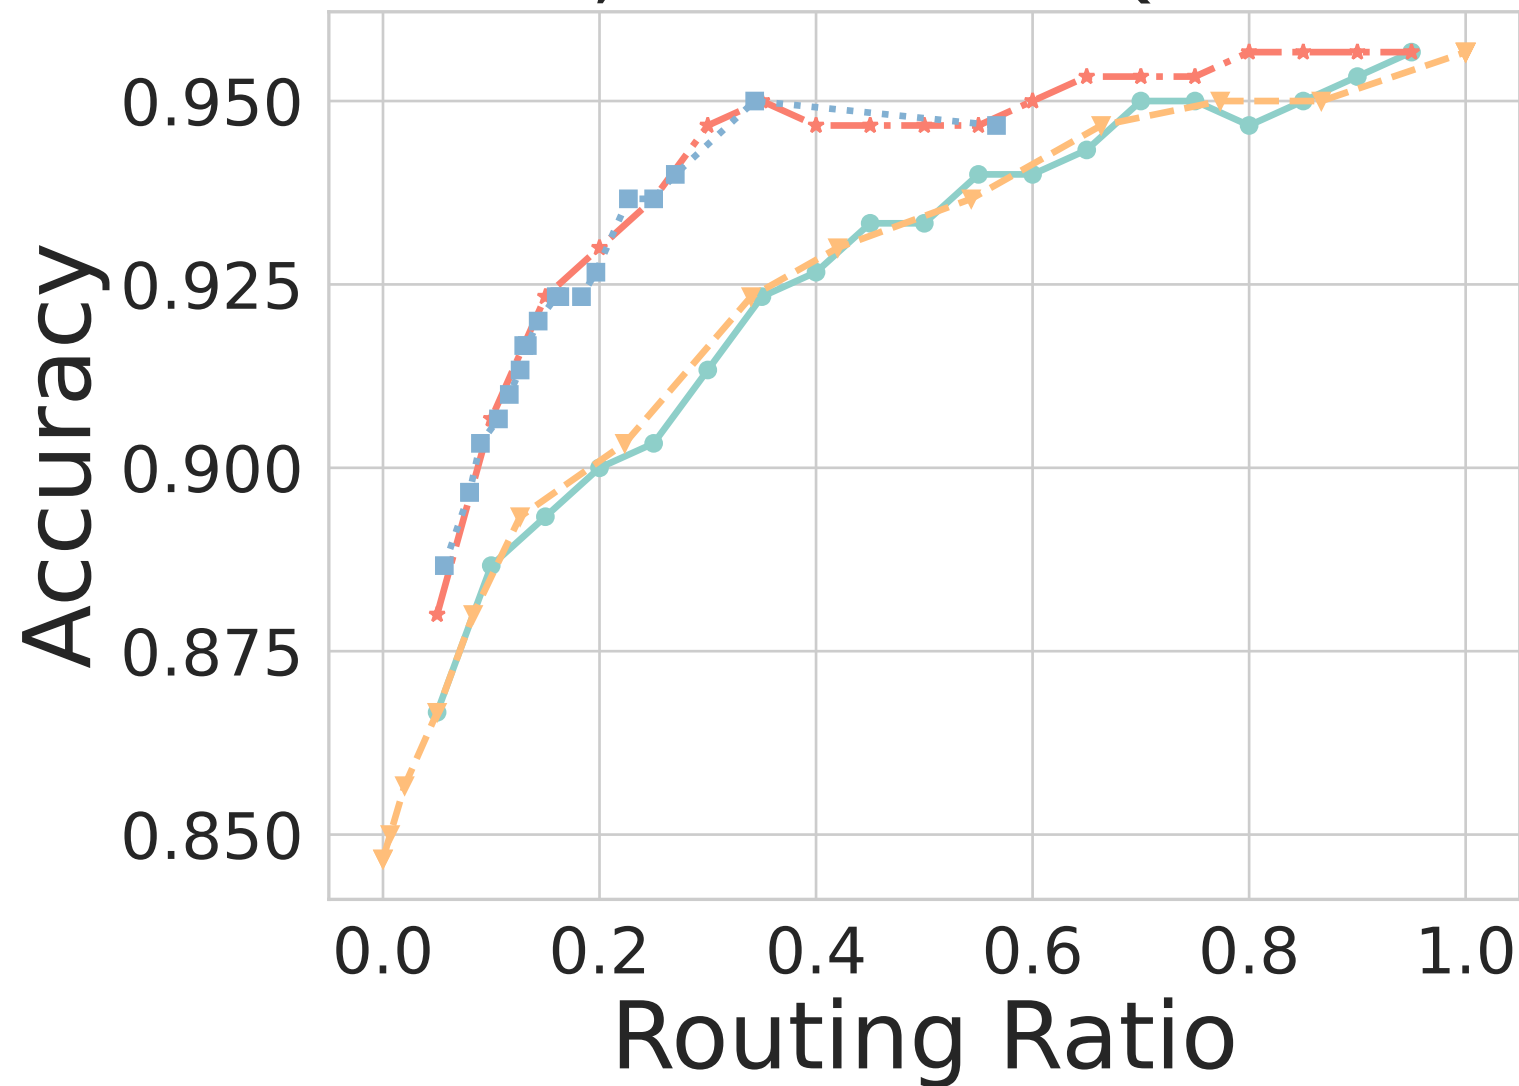

Supplement: supplementary_material [file cali_down_svamp_llama-3.1-8b_Qwen_Qwen3-32B.pdf › Routing_SLM_LLMs/Proxy_routing_prediction/to_Qwen_Qwen3-32B/svamp_as_downstream/cali_down_svamp_llama-3.1-8b_Qwen_Qwen3-32B.pdf]

**SVAMP, llama-3.2-1b to Qwen3-32B**

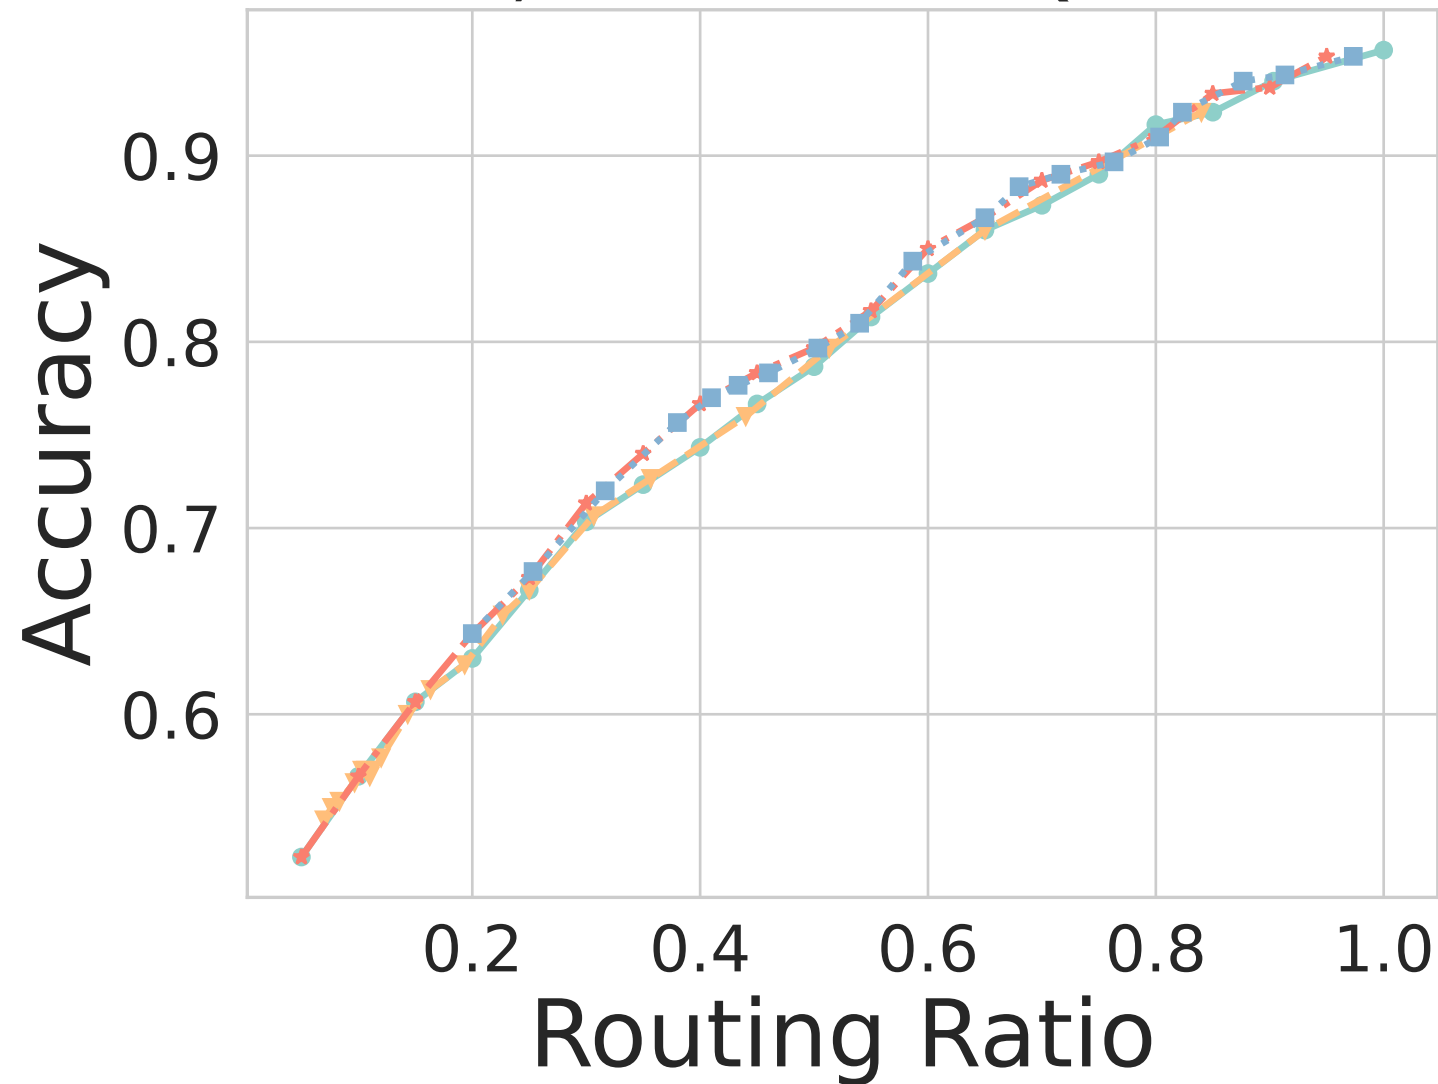

Supplement: supplementary_material [file cali_down_svamp_llama-3.2-1b_Qwen_Qwen3-32B.pdf › Routing_SLM_LLMs/Proxy_routing_prediction/to_Qwen_Qwen3-32B/svamp_as_downstream/cali_down_svamp_llama-3.2-1b_Qwen_Qwen3-32B.pdf]

**SVAMP, llama-3.2-3b to Qwen3-32B**

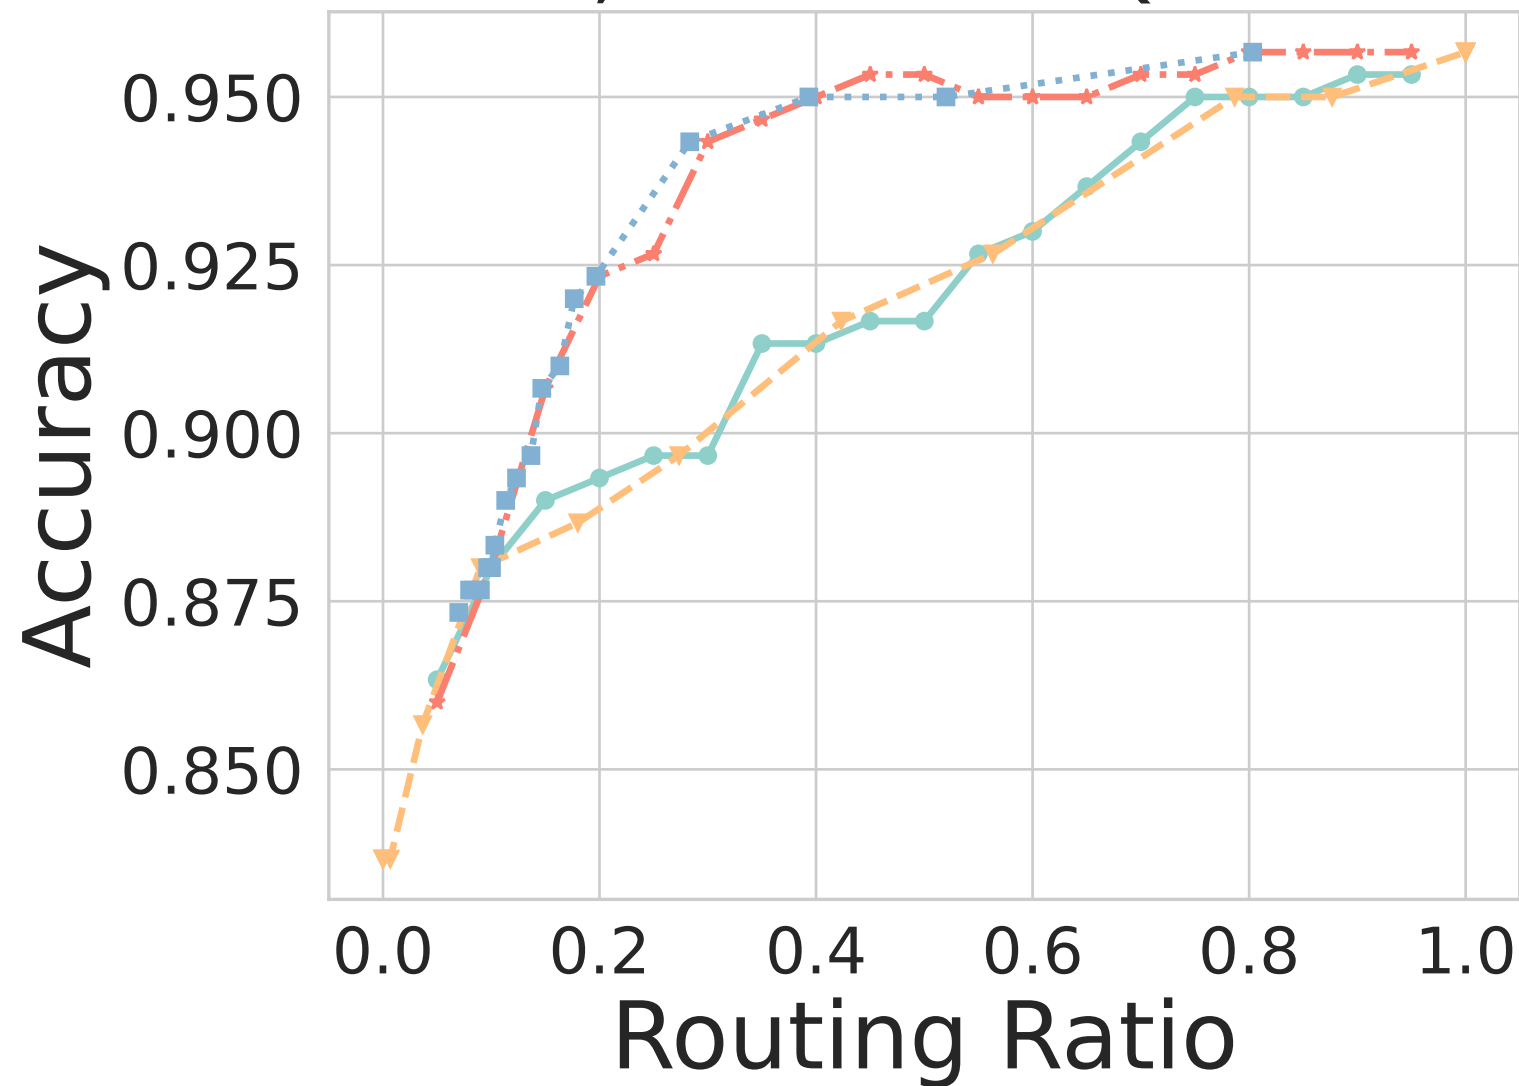

Supplement: supplementary_material [file cali_down_svamp_llama-3.2-3b_Qwen_Qwen3-32B.pdf › Routing_SLM_LLMs/Proxy_routing_prediction/to_Qwen_Qwen3-32B/svamp_as_downstream/cali_down_svamp_llama-3.2-3b_Qwen_Qwen3-32B.pdf]

**SVAMP, mistral-7b to Qwen3-32B**

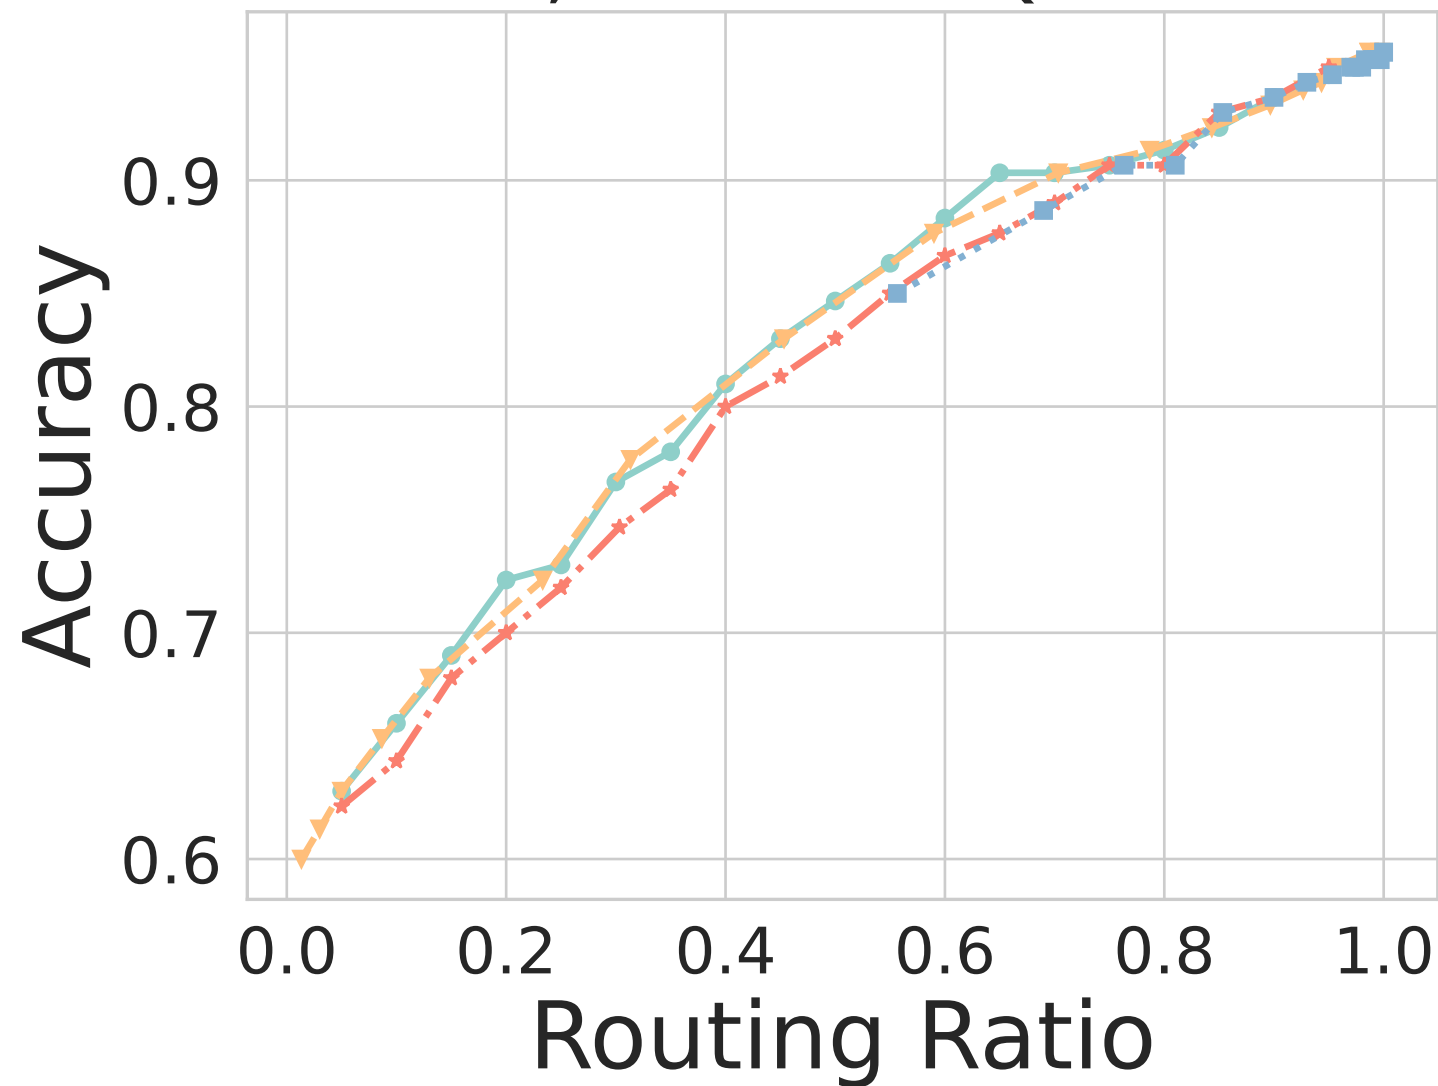

Supplement: supplementary_material [file cali_down_svamp_mistral-7b_Qwen_Qwen3-32B.pdf › Routing_SLM_LLMs/Proxy_routing_prediction/to_Qwen_Qwen3-32B/svamp_as_downstream/cali_down_svamp_mistral-7b_Qwen_Qwen3-32B.pdf]

**SVAMP, phi-3.5-mini to Qwen3-32B**

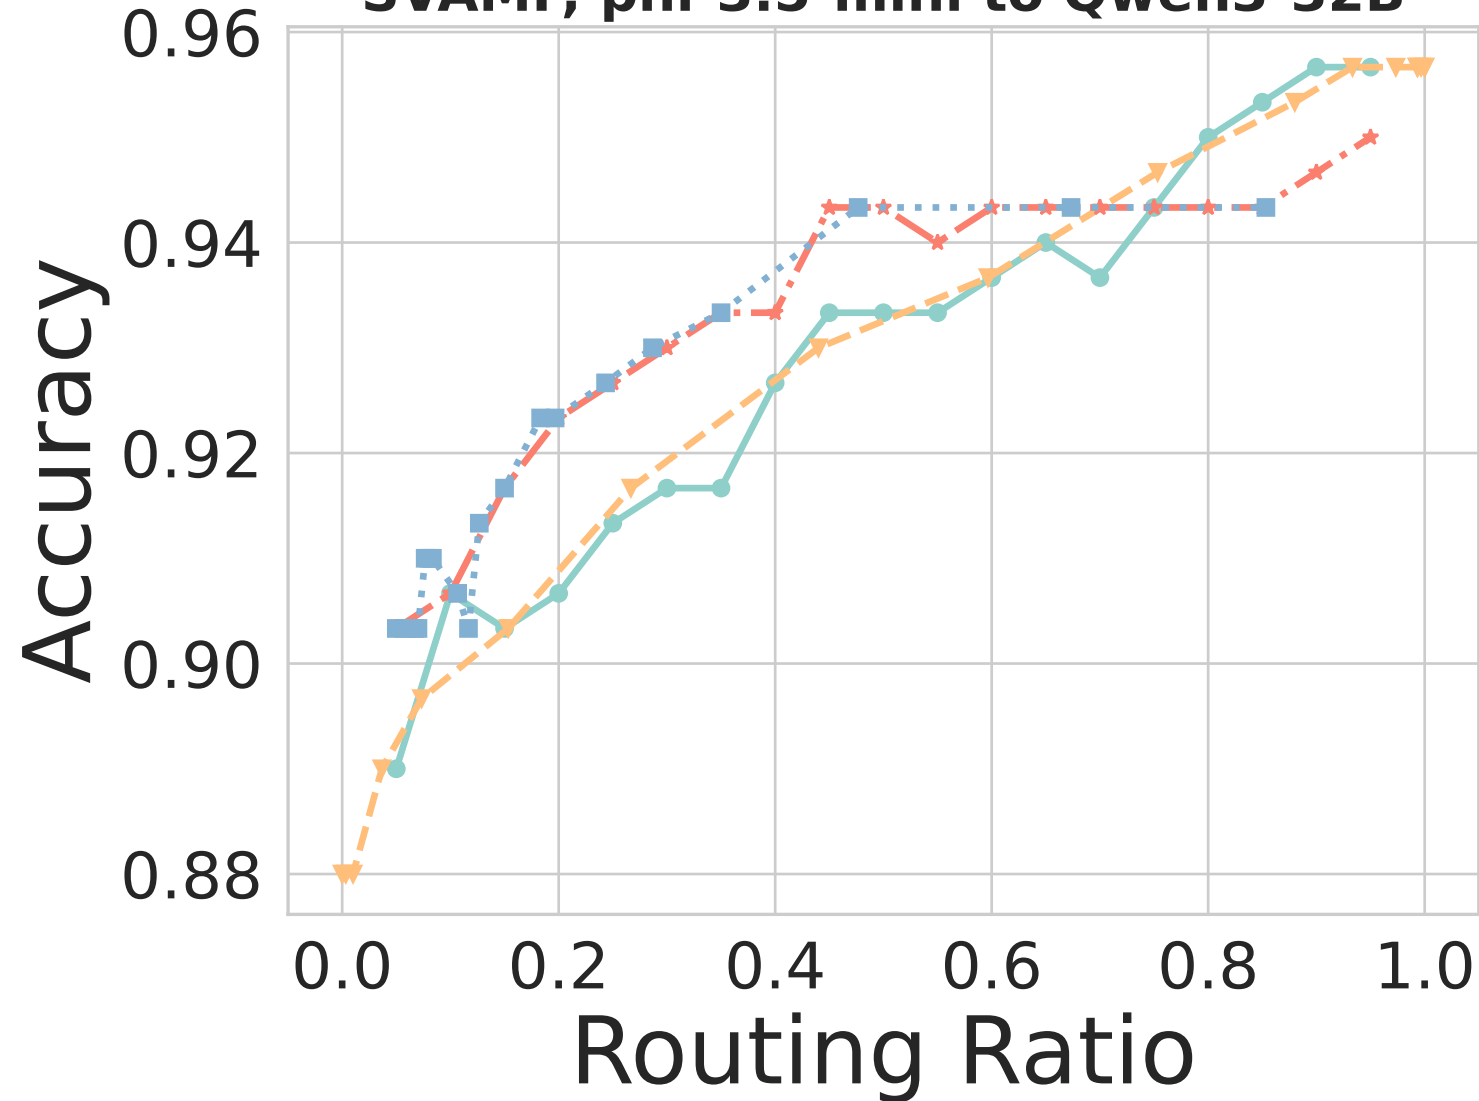

Supplement: supplementary_material [file cali_down_svamp_phi-3.5-mini_Qwen_Qwen3-32B.pdf › Routing_SLM_LLMs/Proxy_routing_prediction/to_Qwen_Qwen3-32B/svamp_as_downstream/cali_down_svamp_phi-3.5-mini_Qwen_Qwen3-32B.pdf]

**SVAMP, phi-4-mini-reasoning to Qwen3-32B**

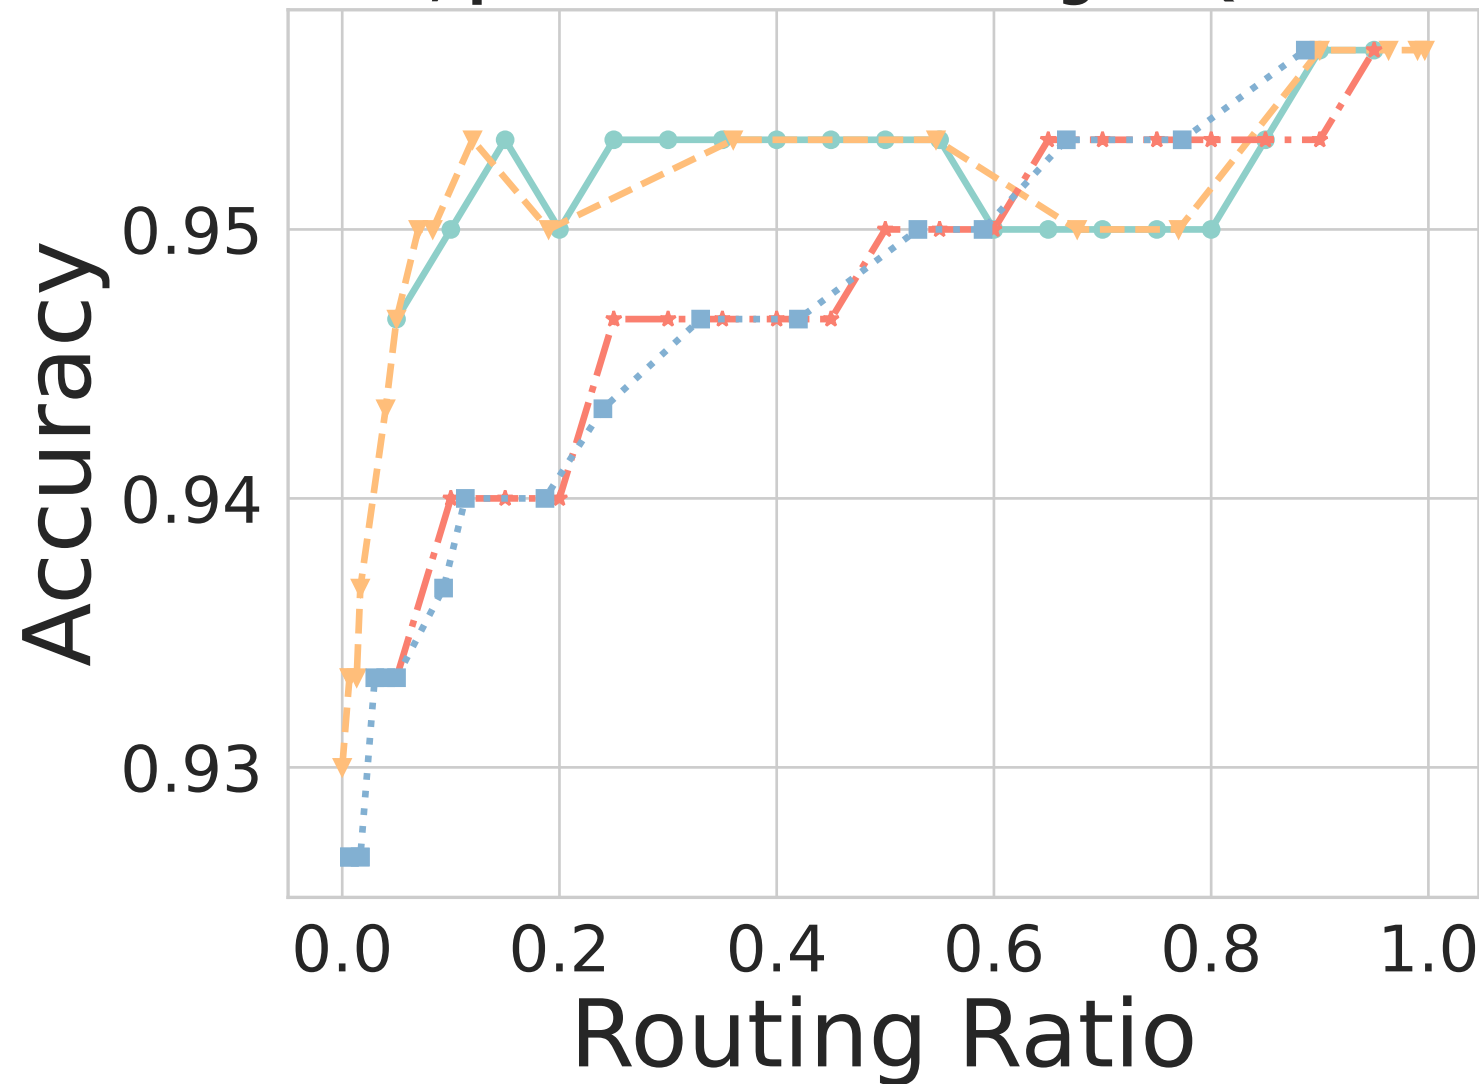

Supplement: supplementary_material [file cali_down_svamp_phi-4-mini-reasoning_Qwen_Qwen3-32B.pdf › Routing_SLM_LLMs/Proxy_routing_prediction/to_Qwen_Qwen3-32B/svamp_as_downstream/cali_down_svamp_phi-4-mini-reasoning_Qwen_Qwen3-32B.pdf]

**SVAMP, qwen-2.5-7b to Qwen3-32B**

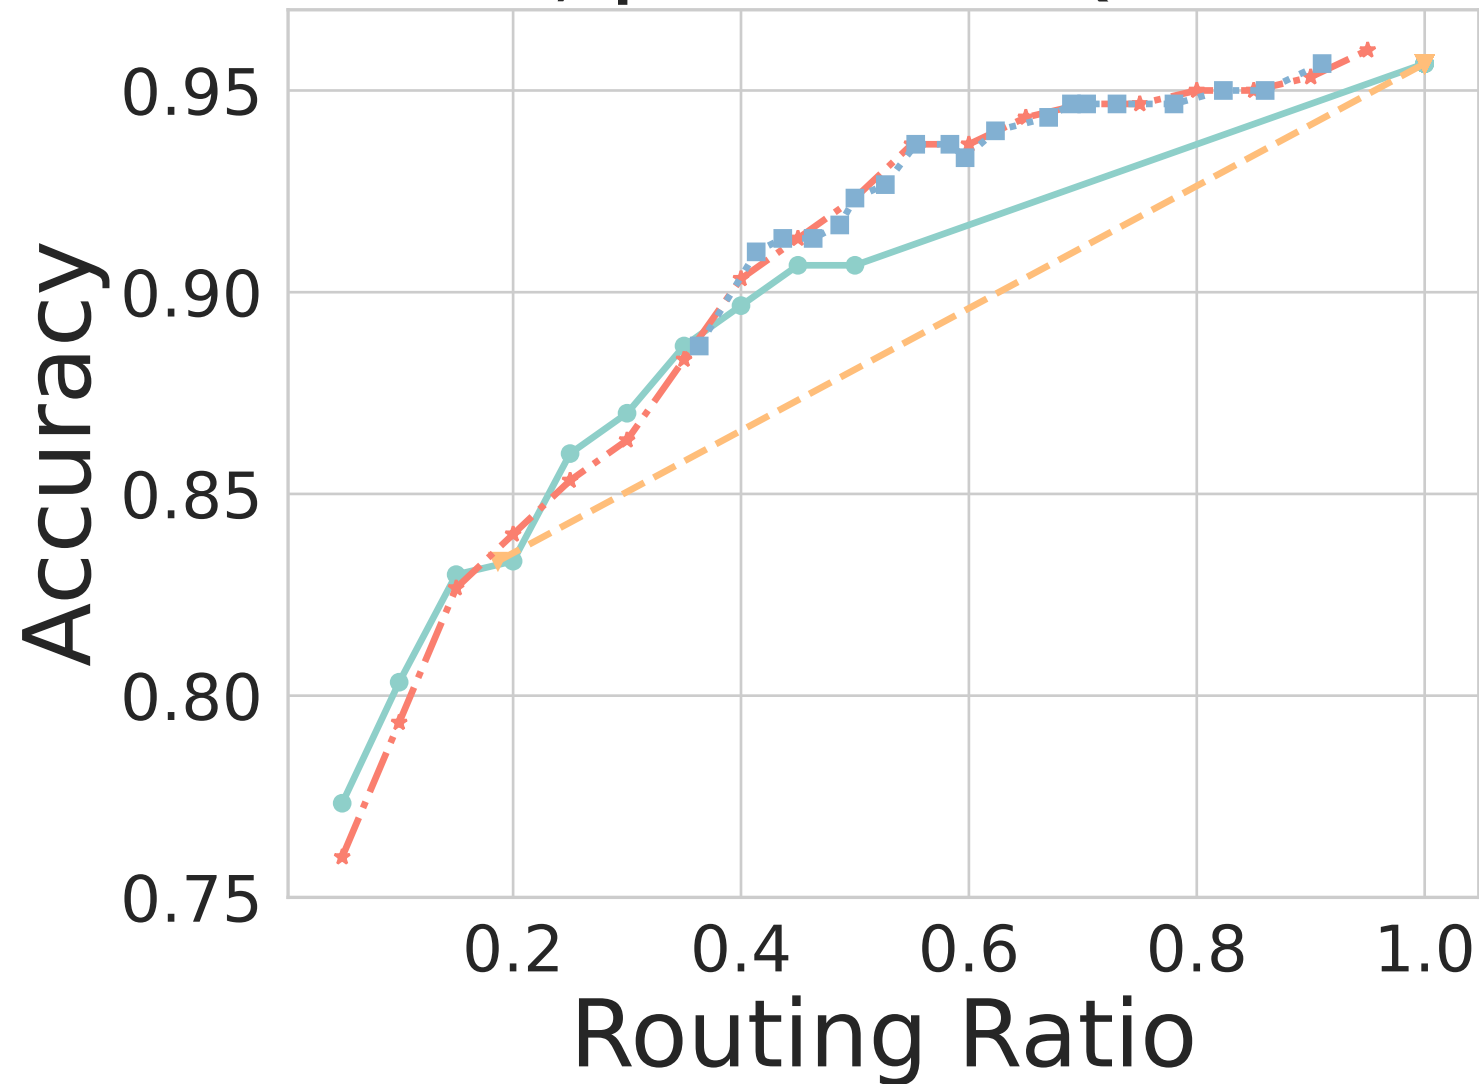

Supplement: supplementary_material [file cali_down_svamp_qwen-2.5-7b_Qwen_Qwen3-32B.pdf › Routing_SLM_LLMs/Proxy_routing_prediction/to_Qwen_Qwen3-32B/svamp_as_downstream/cali_down_svamp_qwen-2.5-7b_Qwen_Qwen3-32B.pdf]

**SVAMP, rwkv to Qwen3-32B**

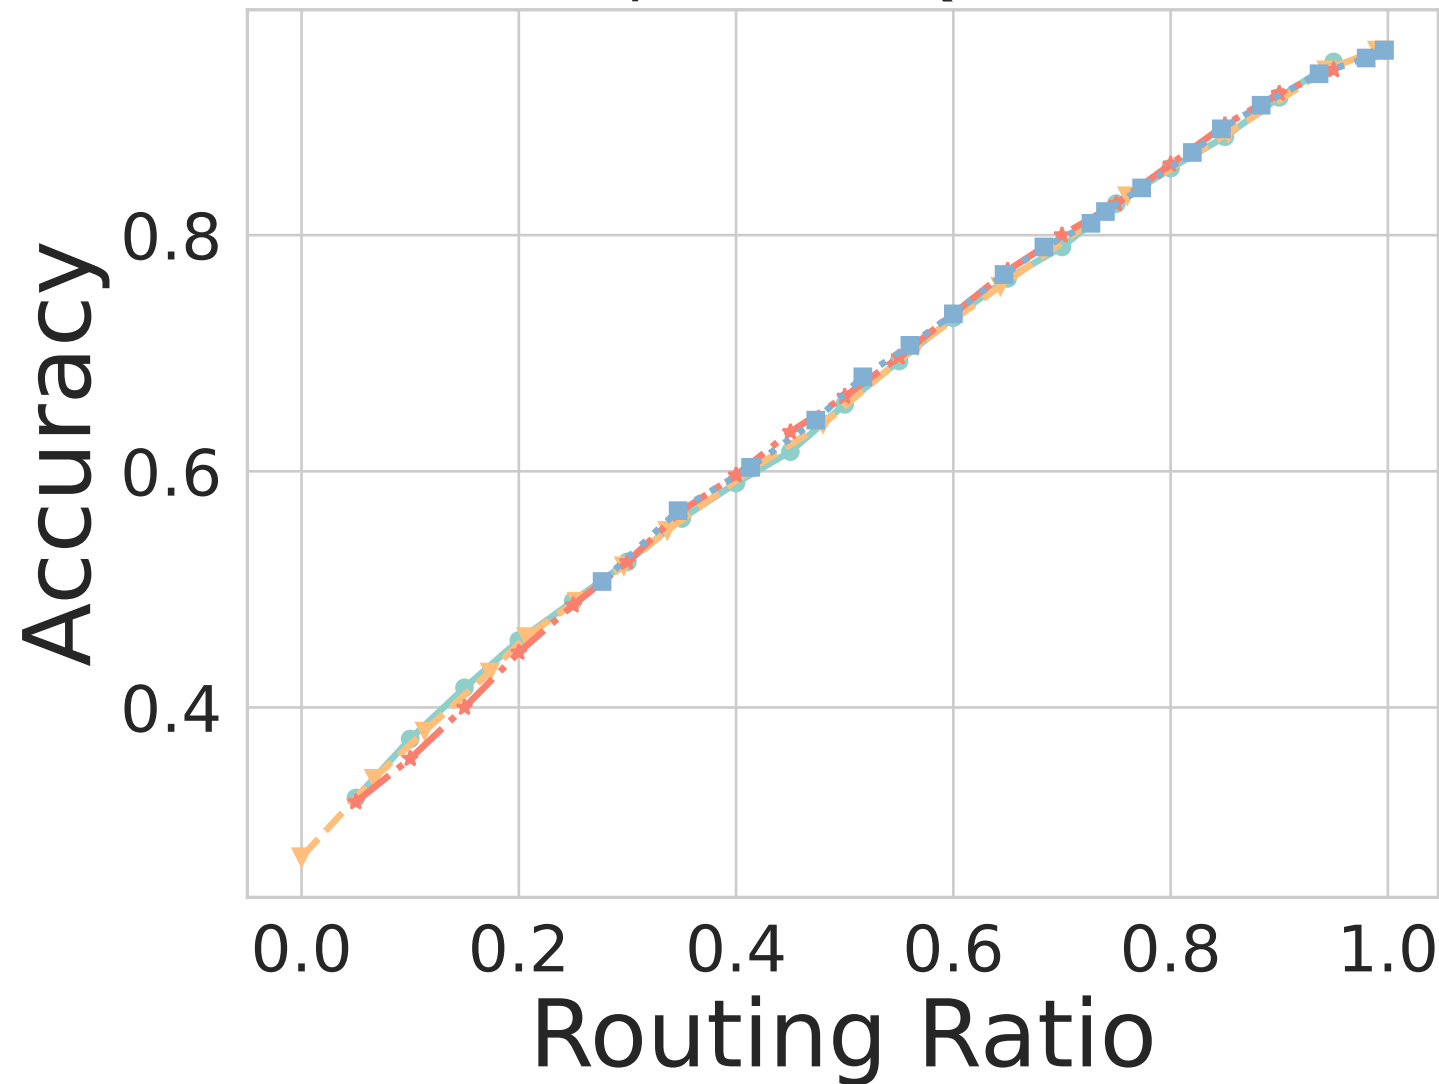

Supplement: supplementary_material [file cali_down_svamp_rwkv_Qwen_Qwen3-32B.pdf › Routing_SLM_LLMs/Proxy_routing_prediction/to_Qwen_Qwen3-32B/svamp_as_downstream/cali_down_svamp_rwkv_Qwen_Qwen3-32B.pdf]

**TruthfulQA, Qwen3-0.6B to Qwen3-32B**

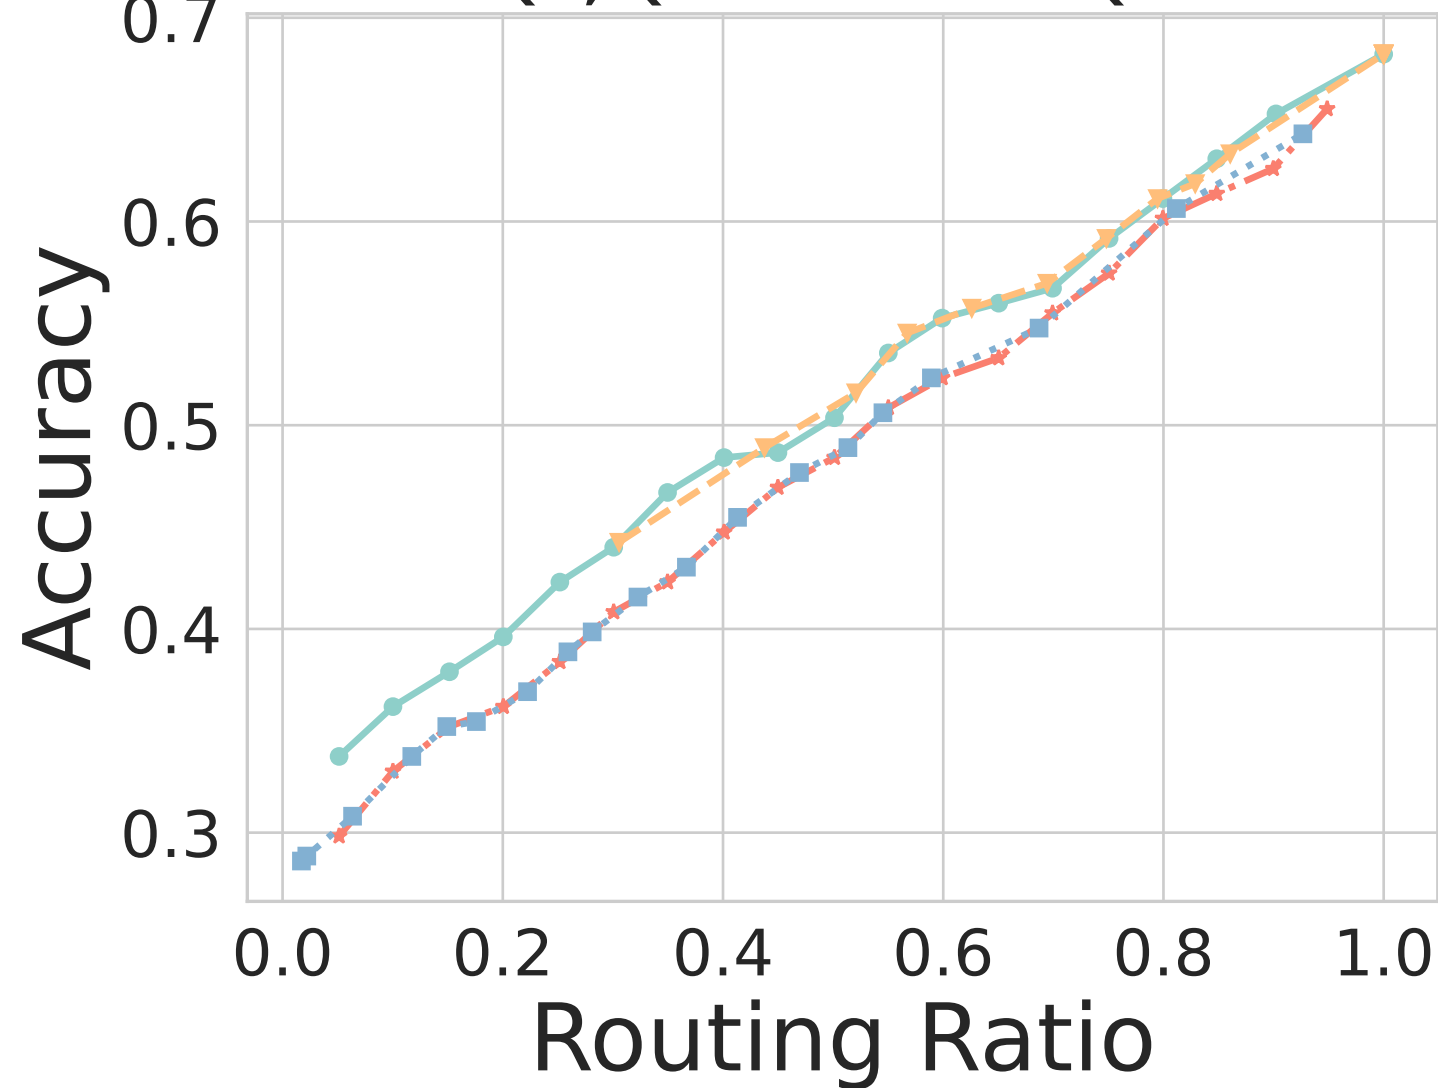

Supplement: supplementary_material [file cali_down_truthful_qa_Qwen3-0.6B_Qwen_Qwen3-32B.pdf › Routing_SLM_LLMs/Proxy_routing_prediction/to_Qwen_Qwen3-32B/truthful_qa_as_downstream/cali_down_truthful_qa_Qwen3-0.6B_Qwen_Qwen3-32B.pdf]

**TruthfulQA, Qwen3-1.7B to Qwen3-32B**

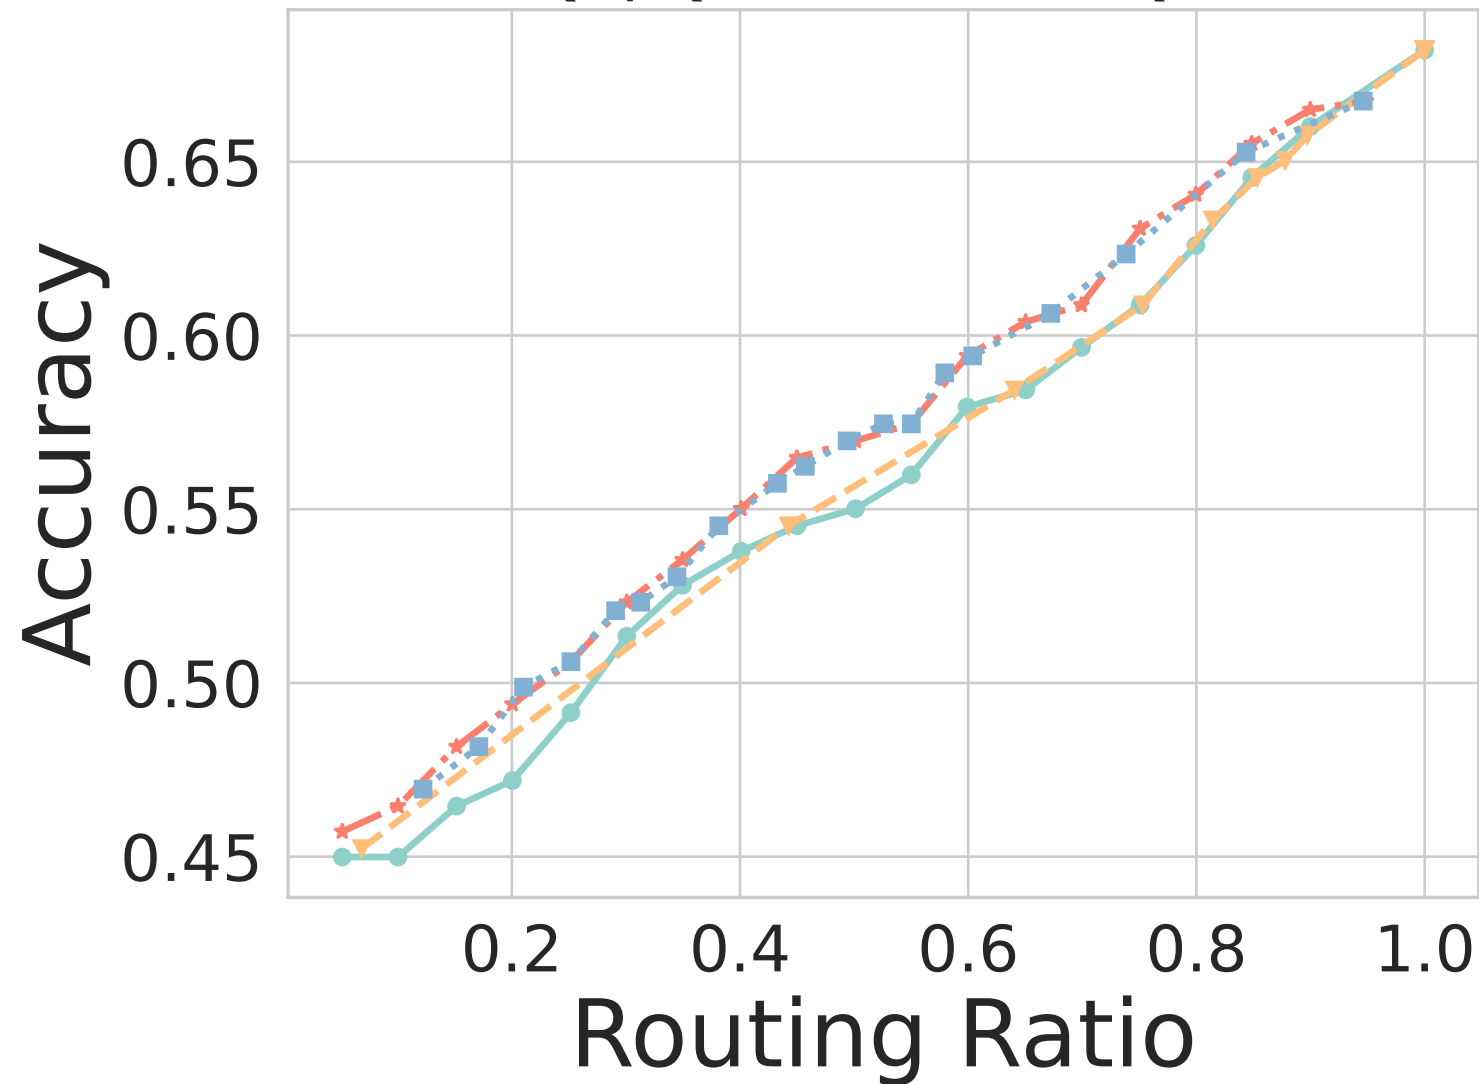

Supplement: supplementary_material [file cali_down_truthful_qa_Qwen3-1.7B_Qwen_Qwen3-32B.pdf › Routing_SLM_LLMs/Proxy_routing_prediction/to_Qwen_Qwen3-32B/truthful_qa_as_downstream/cali_down_truthful_qa_Qwen3-1.7B_Qwen_Qwen3-32B.pdf]

**TruthfulQA, Qwen3-4B to Qwen3-32B**

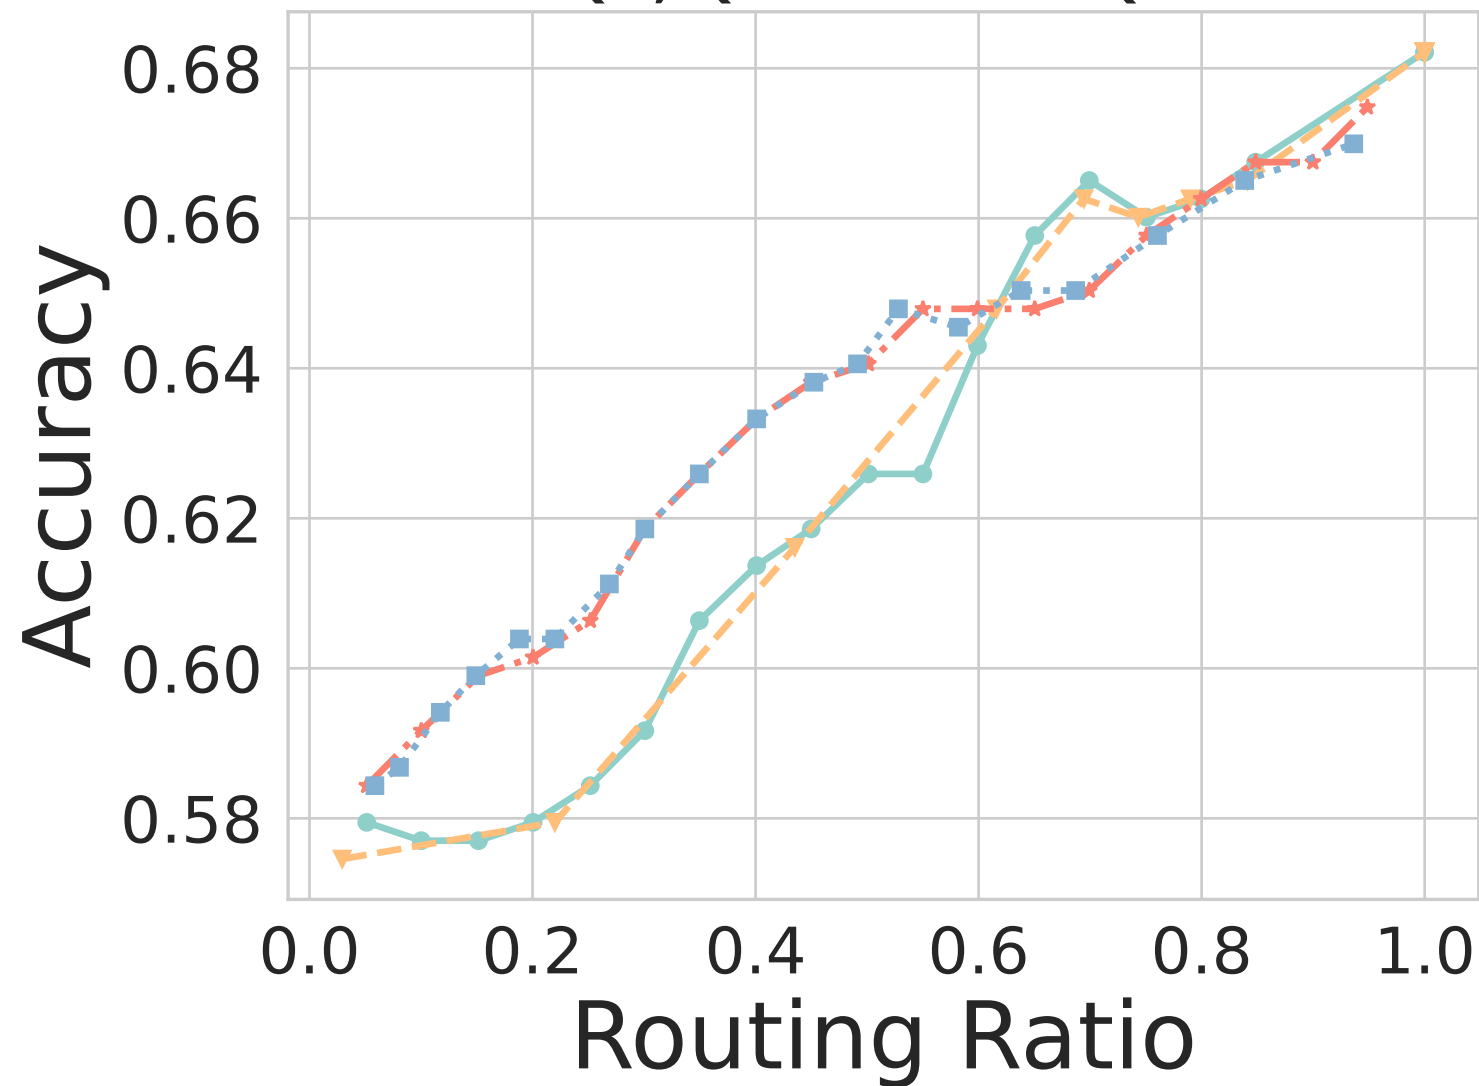

Supplement: supplementary_material [file cali_down_truthful_qa_Qwen3-4B_Qwen_Qwen3-32B.pdf › Routing_SLM_LLMs/Proxy_routing_prediction/to_Qwen_Qwen3-32B/truthful_qa_as_downstream/cali_down_truthful_qa_Qwen3-4B_Qwen_Qwen3-32B.pdf]

TruthfulQA, granite-3.1-8b to Qwen3-32B

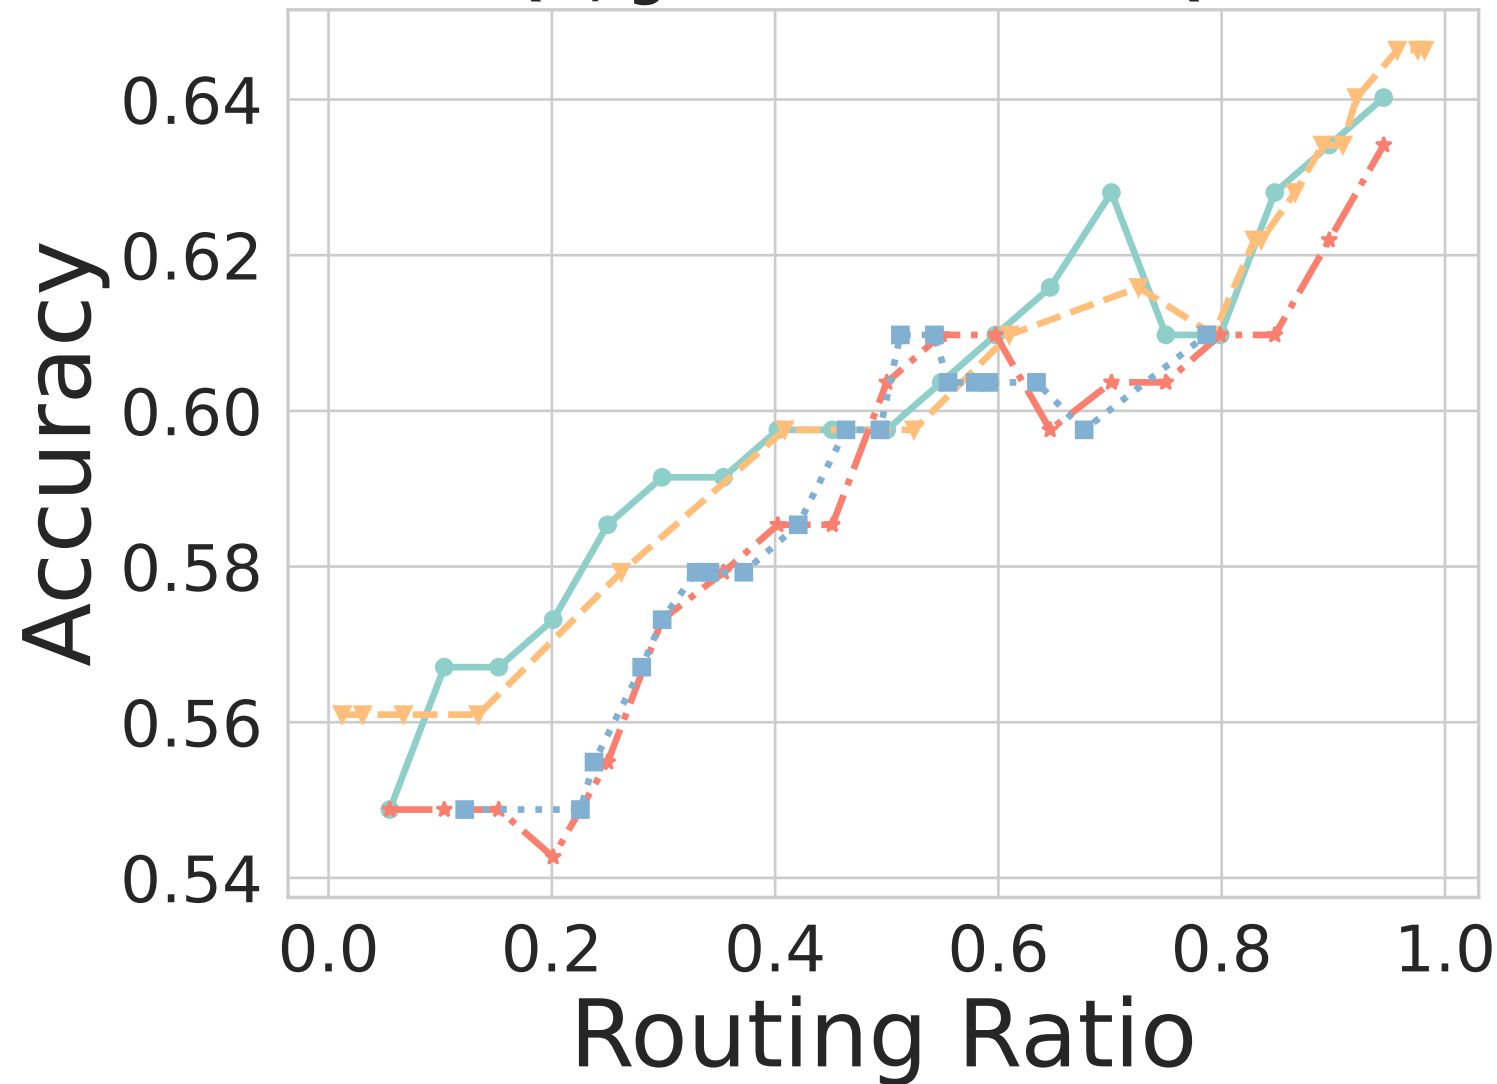

Supplement: supplementary_material [file cali_down_truthful_qa_granite-3.1-8b_Qwen_Qwen3-32B.pdf › Routing_SLM_LLMs/Proxy_routing_prediction/to_Qwen_Qwen3-32B/truthful_qa_as_downstream/cali_down_truthful_qa_granite-3.1-8b_Qwen_Qwen3-32B.pdf]

**TruthfulQA, llama-3.1-8b to Qwen3-32B**

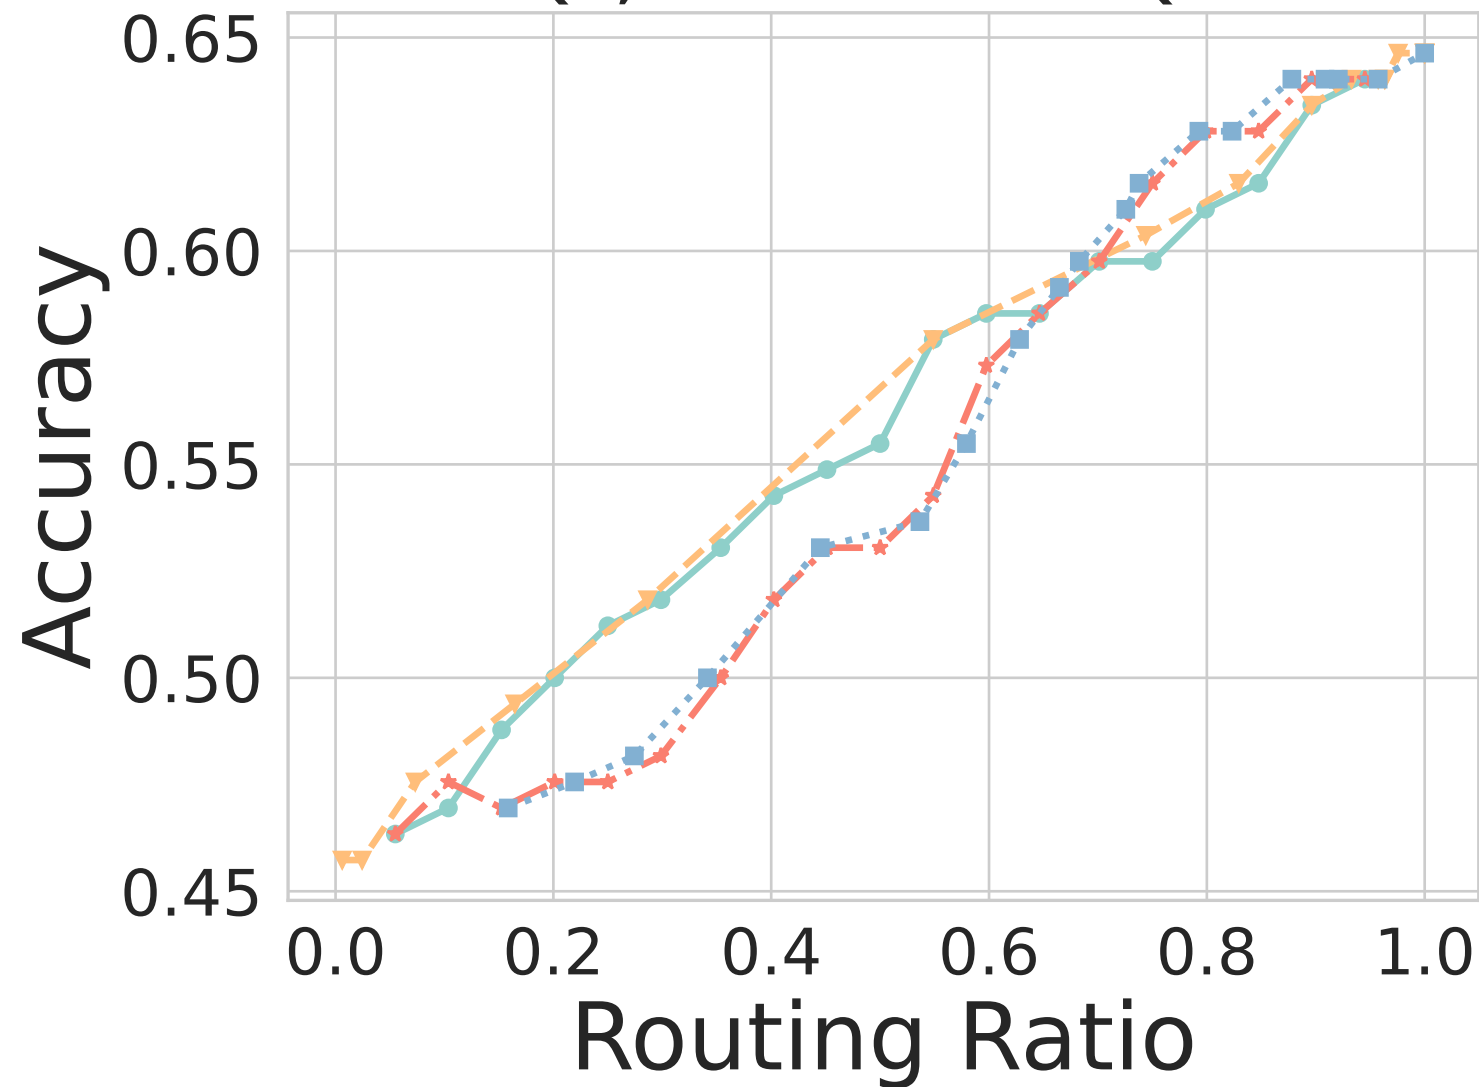

Supplement: supplementary_material [file cali_down_truthful_qa_llama-3.1-8b_Qwen_Qwen3-32B.pdf › Routing_SLM_LLMs/Proxy_routing_prediction/to_Qwen_Qwen3-32B/truthful_qa_as_downstream/cali_down_truthful_qa_llama-3.1-8b_Qwen_Qwen3-32B.pdf]

**TruthfulQA, llama-3.2-1b to Qwen3-32B**

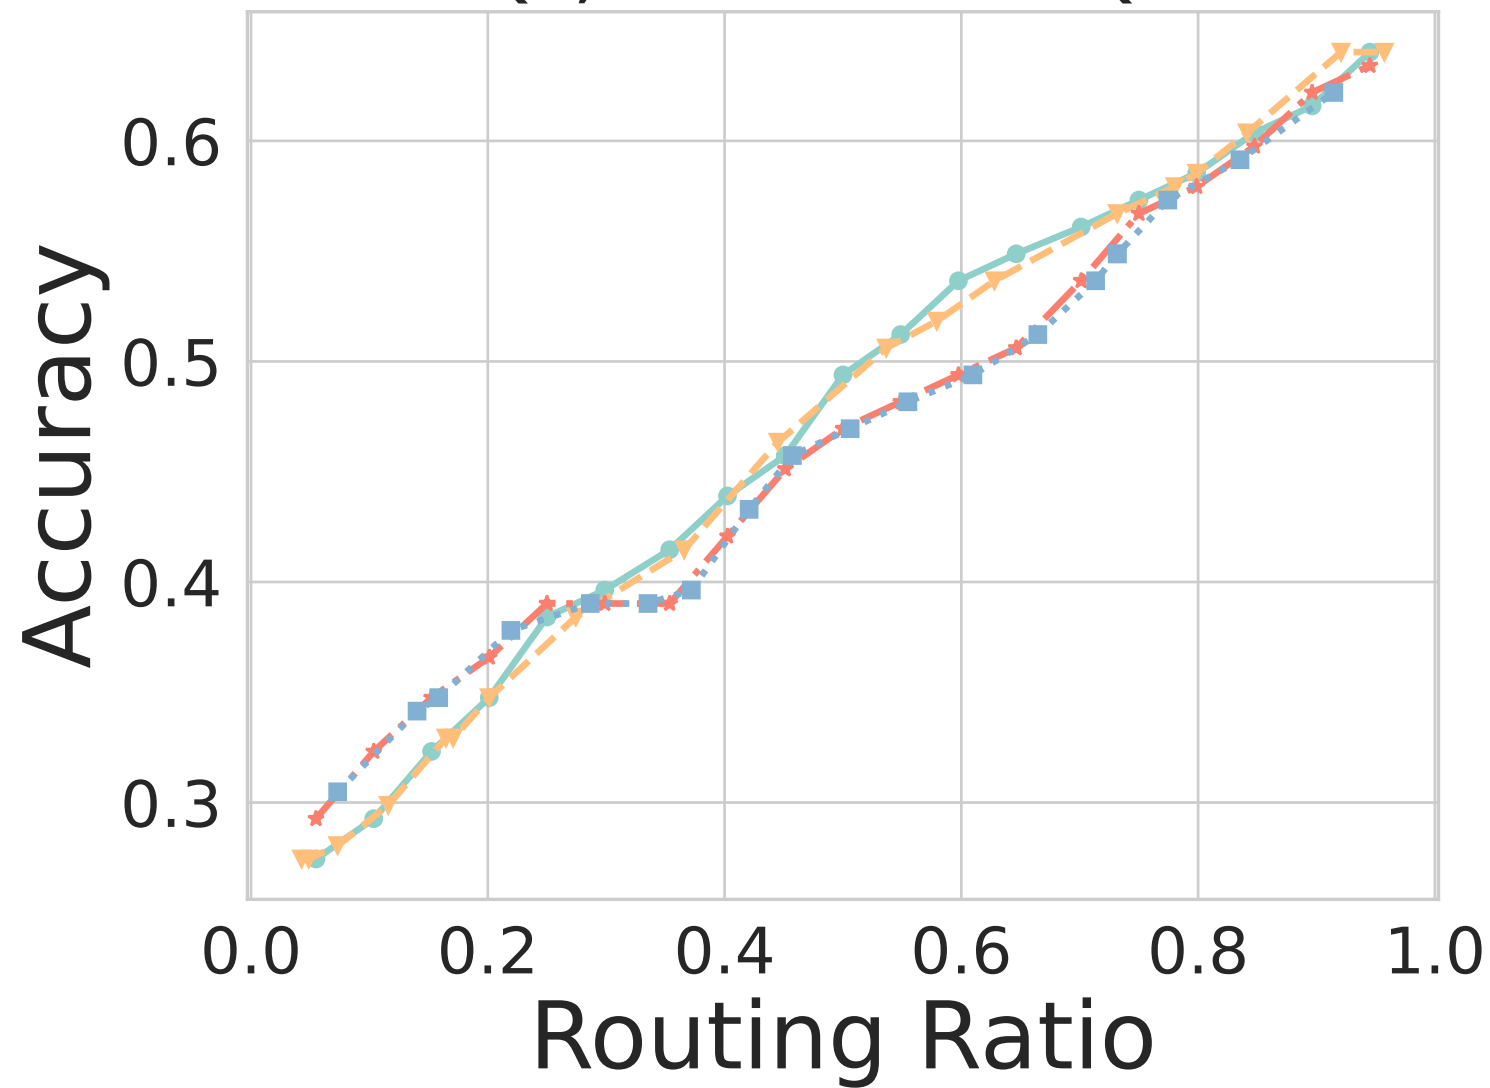

Supplement: supplementary_material [file cali_down_truthful_qa_llama-3.2-1b_Qwen_Qwen3-32B.pdf › Routing_SLM_LLMs/Proxy_routing_prediction/to_Qwen_Qwen3-32B/truthful_qa_as_downstream/cali_down_truthful_qa_llama-3.2-1b_Qwen_Qwen3-32B.pdf]

**TruthfulQA, llama-3.2-3b to Qwen3-32B**

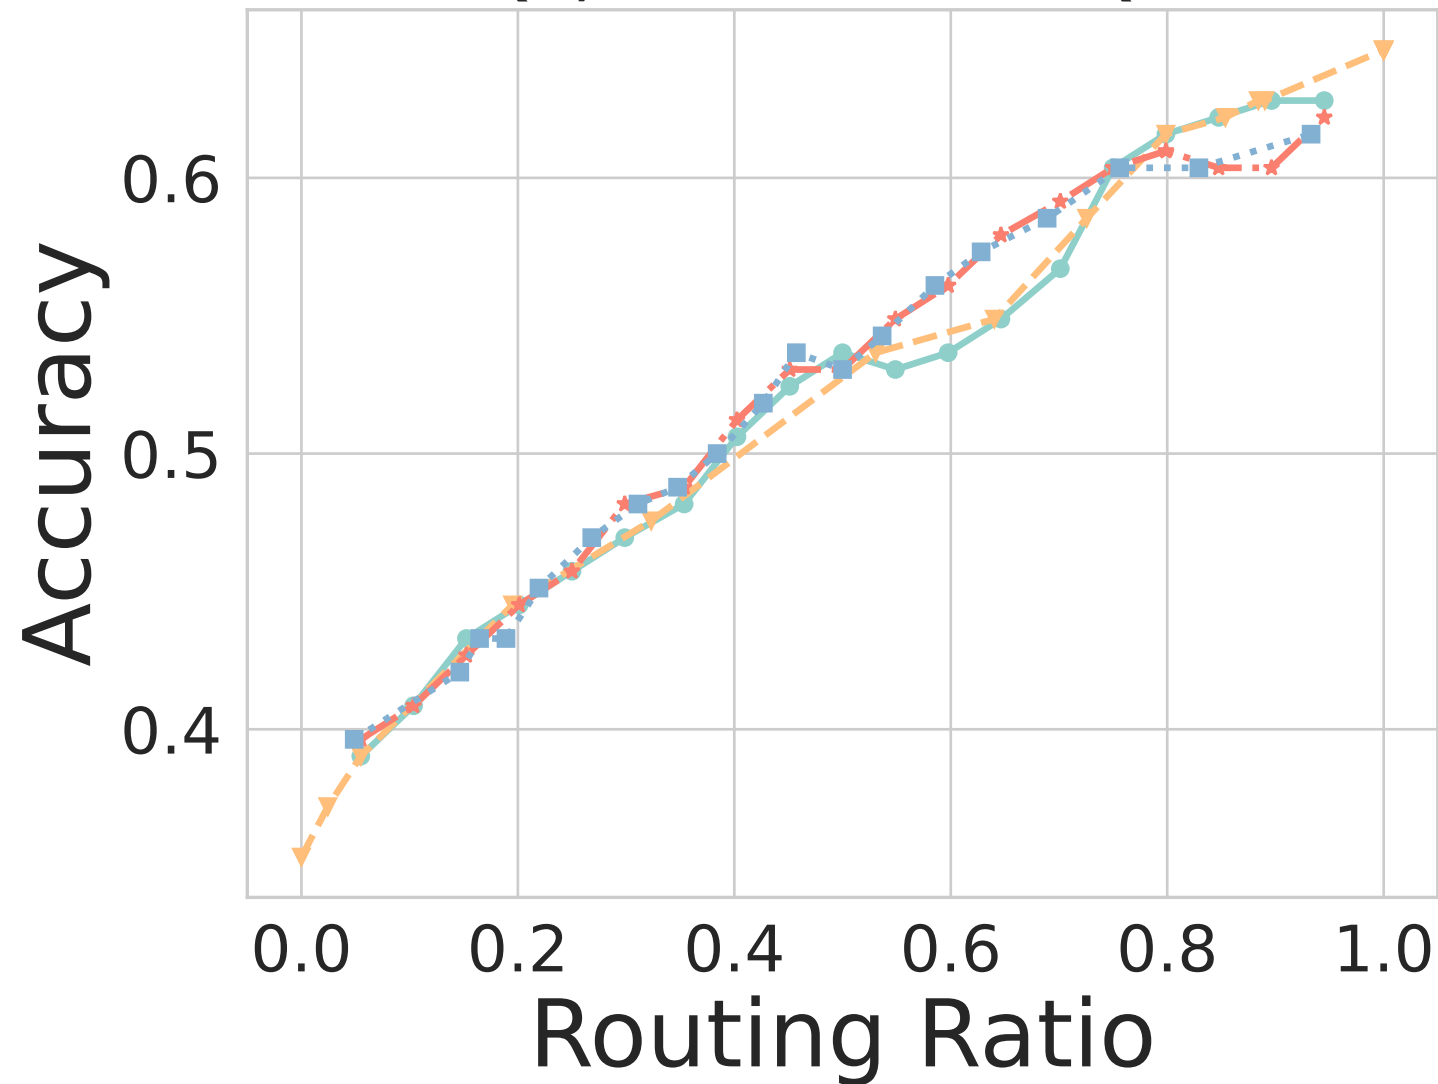

Supplement: supplementary_material [file cali_down_truthful_qa_llama-3.2-3b_Qwen_Qwen3-32B.pdf › Routing_SLM_LLMs/Proxy_routing_prediction/to_Qwen_Qwen3-32B/truthful_qa_as_downstream/cali_down_truthful_qa_llama-3.2-3b_Qwen_Qwen3-32B.pdf]

TruthfulQA, mistral-7b to Qwen3-32B

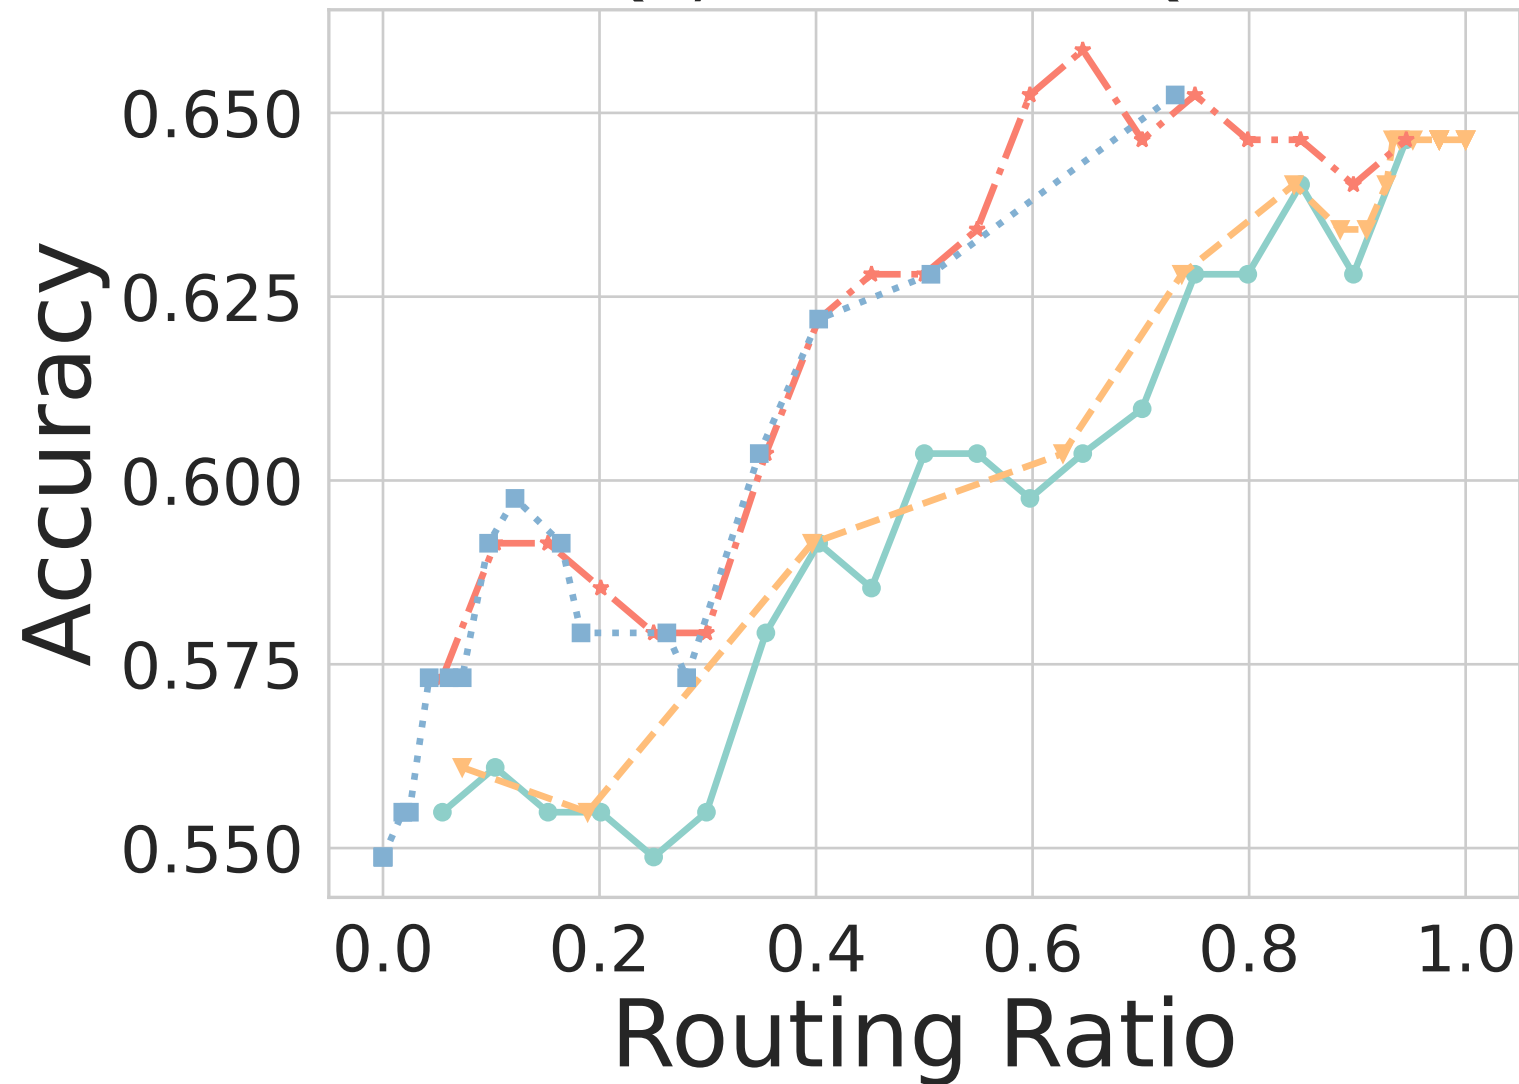

Supplement: supplementary_material [file cali_down_truthful_qa_mistral-7b_Qwen_Qwen3-32B.pdf › Routing_SLM_LLMs/Proxy_routing_prediction/to_Qwen_Qwen3-32B/truthful_qa_as_downstream/cali_down_truthful_qa_mistral-7b_Qwen_Qwen3-32B.pdf]

**TruthfulQA, phi-3.5-mini to Qwen3-32B**

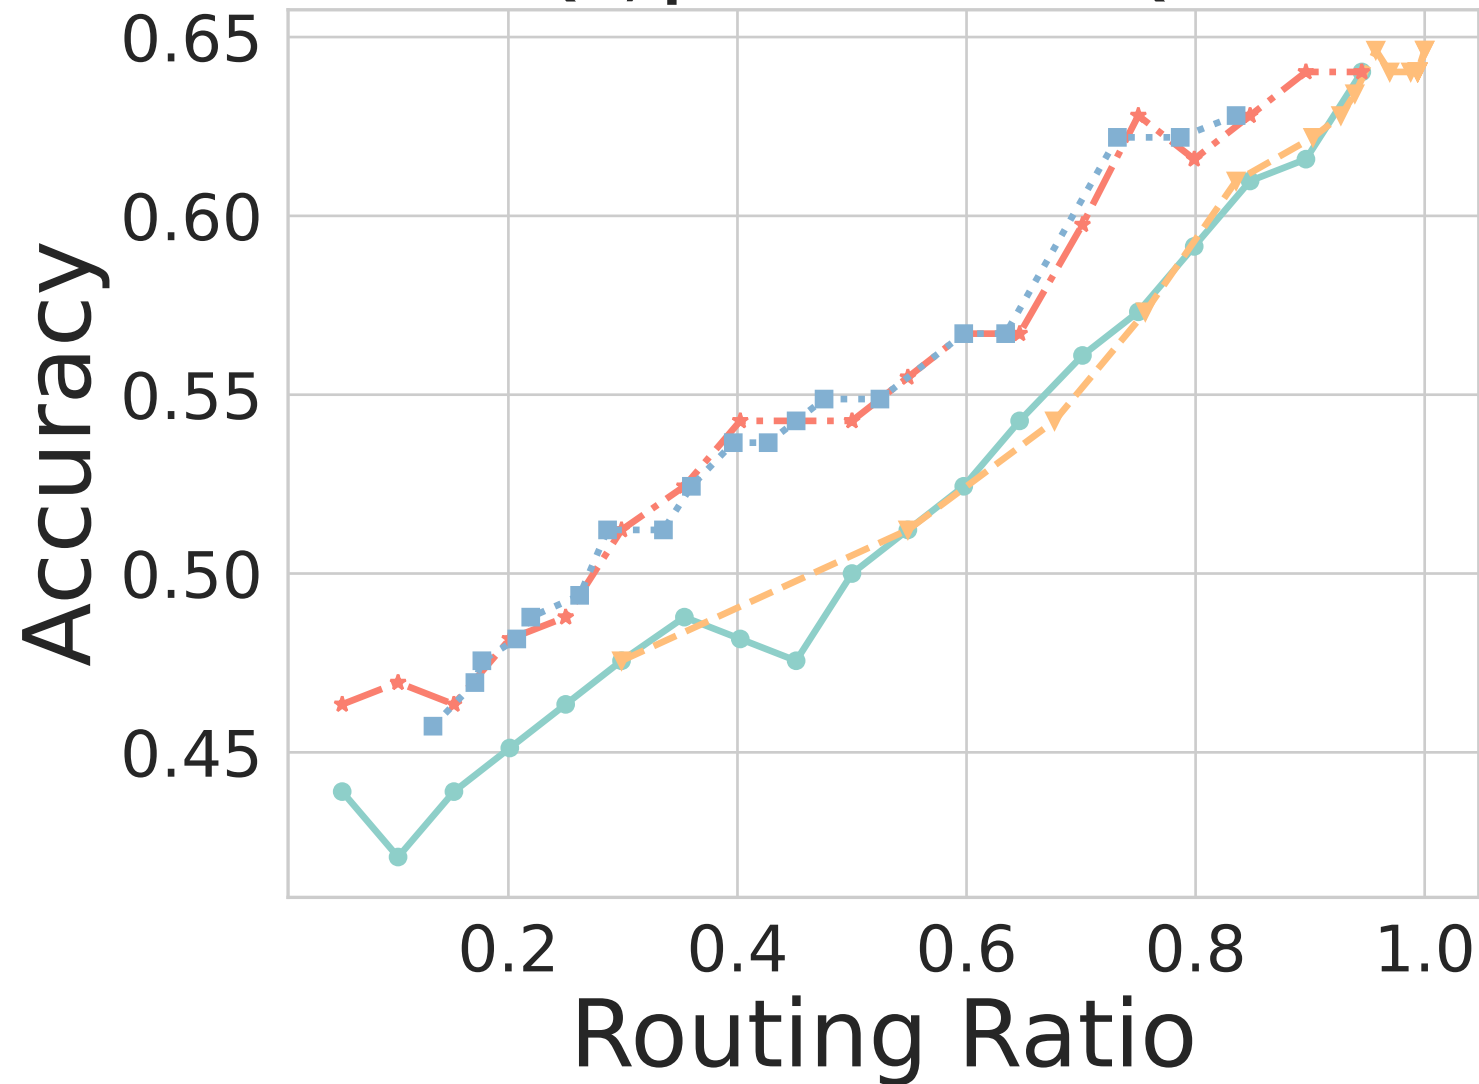

Supplement: supplementary_material [file cali_down_truthful_qa_phi-3.5-mini_Qwen_Qwen3-32B.pdf › Routing_SLM_LLMs/Proxy_routing_prediction/to_Qwen_Qwen3-32B/truthful_qa_as_downstream/cali_down_truthful_qa_phi-3.5-mini_Qwen_Qwen3-32B.pdf]

**TruthfulQA, phi-4-mini-reasoning to Qwen3-32B**

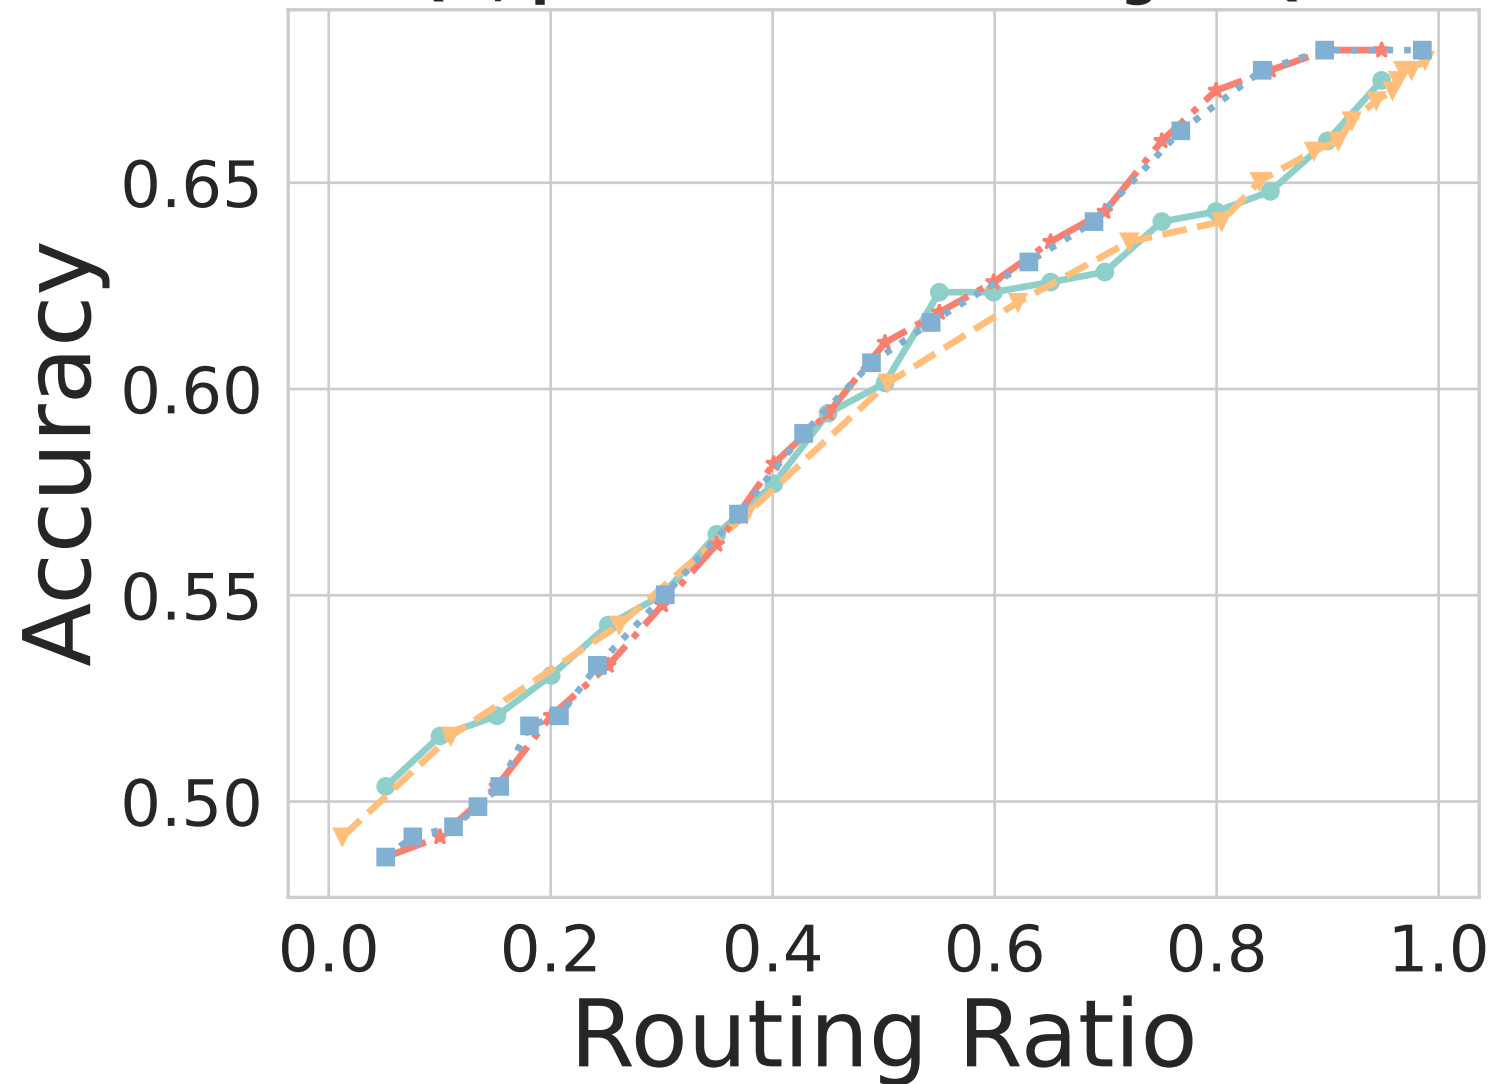

Supplement: supplementary_material [file cali_down_truthful_qa_phi-4-mini-reasoning_Qwen_Qwen3-32B.pdf › Routing_SLM_LLMs/Proxy_routing_prediction/to_Qwen_Qwen3-32B/truthful_qa_as_downstream/cali_down_truthful_qa_phi-4-mini-reasoning_Qwen_Qwen3-32B.pdf]

**TruthfulQA, qwen-2.5-7b to Qwen3-32B**

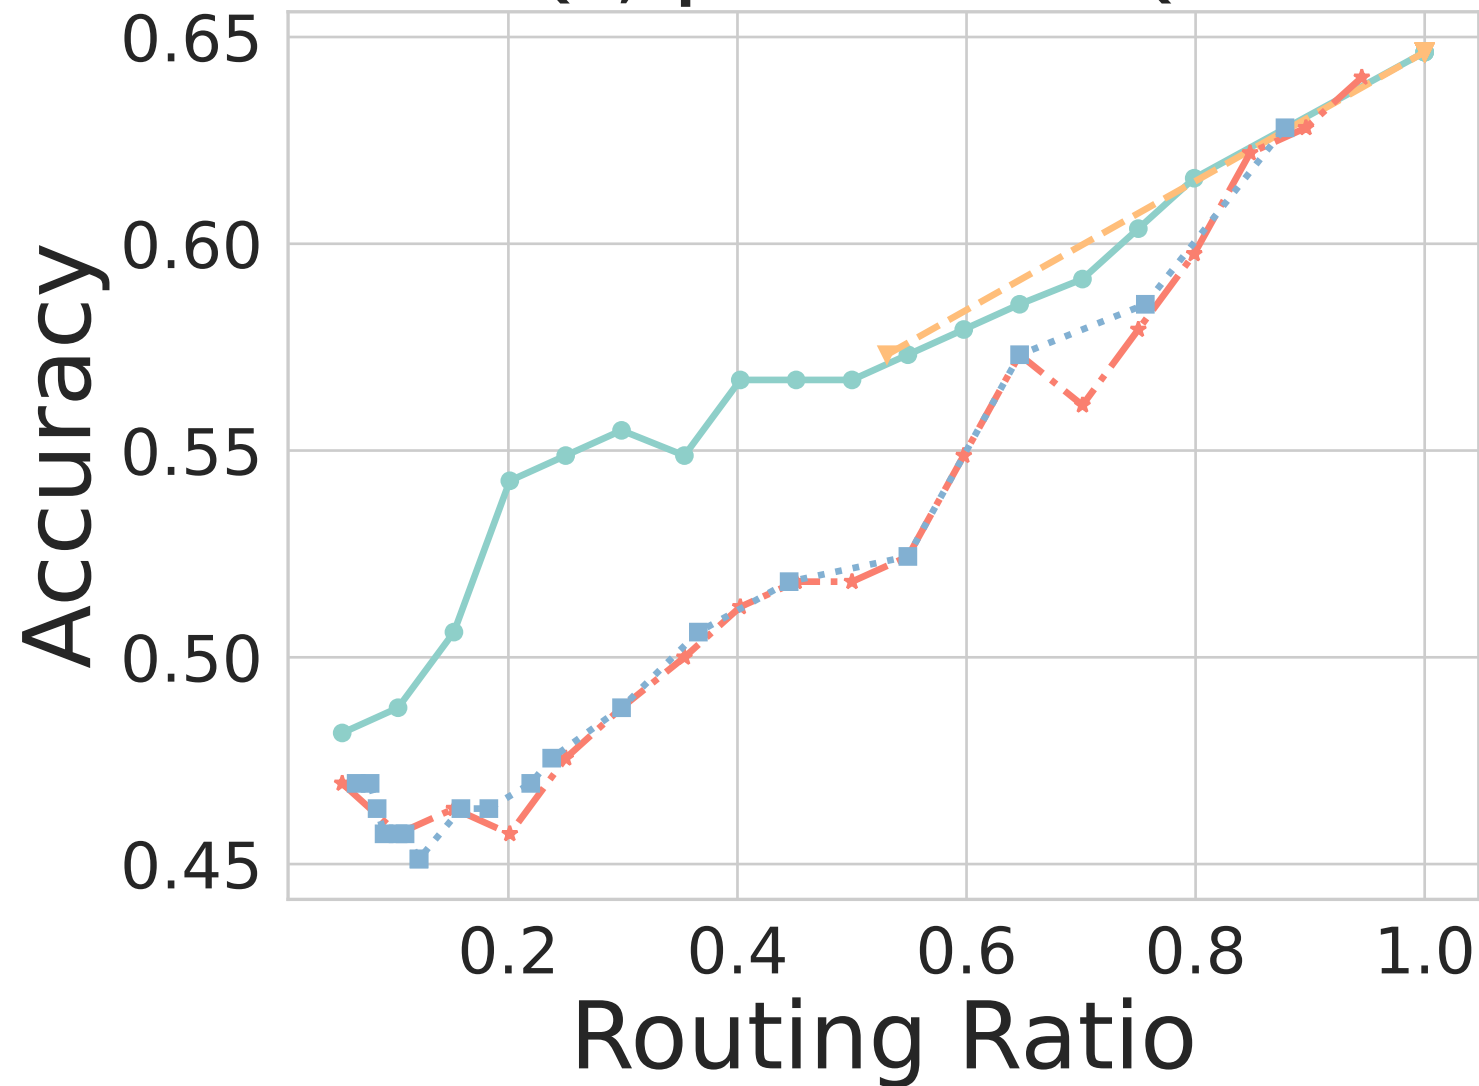

Supplement: supplementary_material [file cali_down_truthful_qa_qwen-2.5-7b_Qwen_Qwen3-32B.pdf › Routing_SLM_LLMs/Proxy_routing_prediction/to_Qwen_Qwen3-32B/truthful_qa_as_downstream/cali_down_truthful_qa_qwen-2.5-7b_Qwen_Qwen3-32B.pdf]

**TruthfulQA, rwkv to Qwen3-32B**

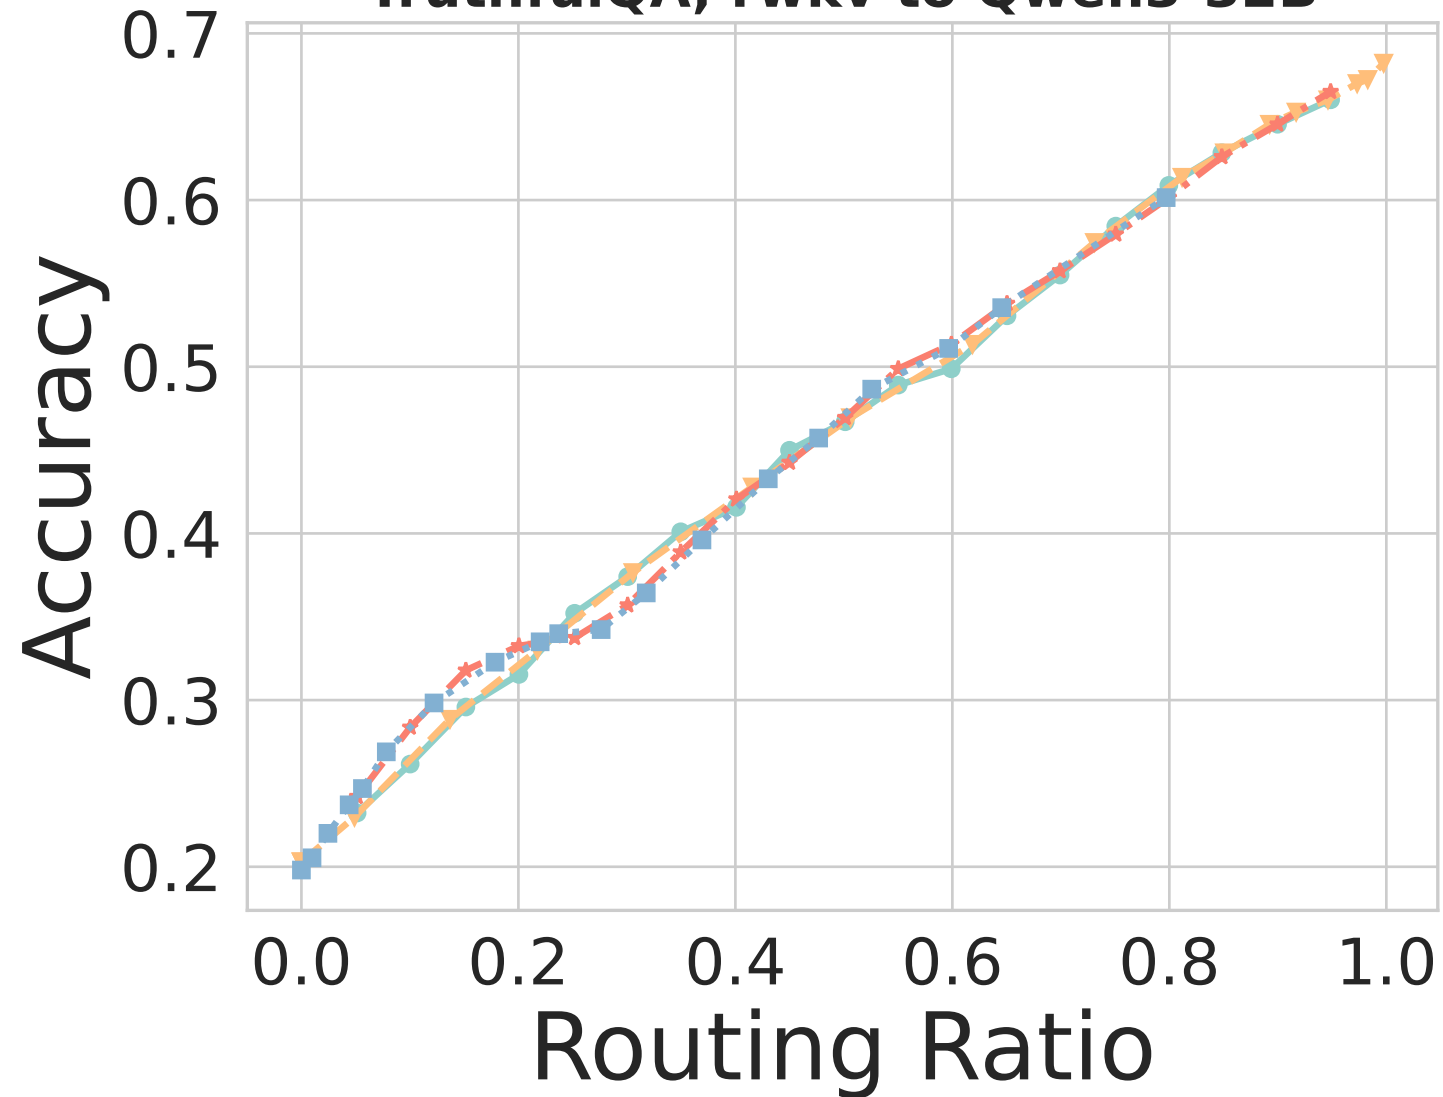

Supplement: supplementary_material [file cali_down_truthful_qa_rwkv_Qwen_Qwen3-32B.pdf › Routing_SLM_LLMs/Proxy_routing_prediction/to_Qwen_Qwen3-32B/truthful_qa_as_downstream/cali_down_truthful_qa_rwkv_Qwen_Qwen3-32B.pdf]

**WinoGrande, Qwen3-0.6B to Qwen3-32B**

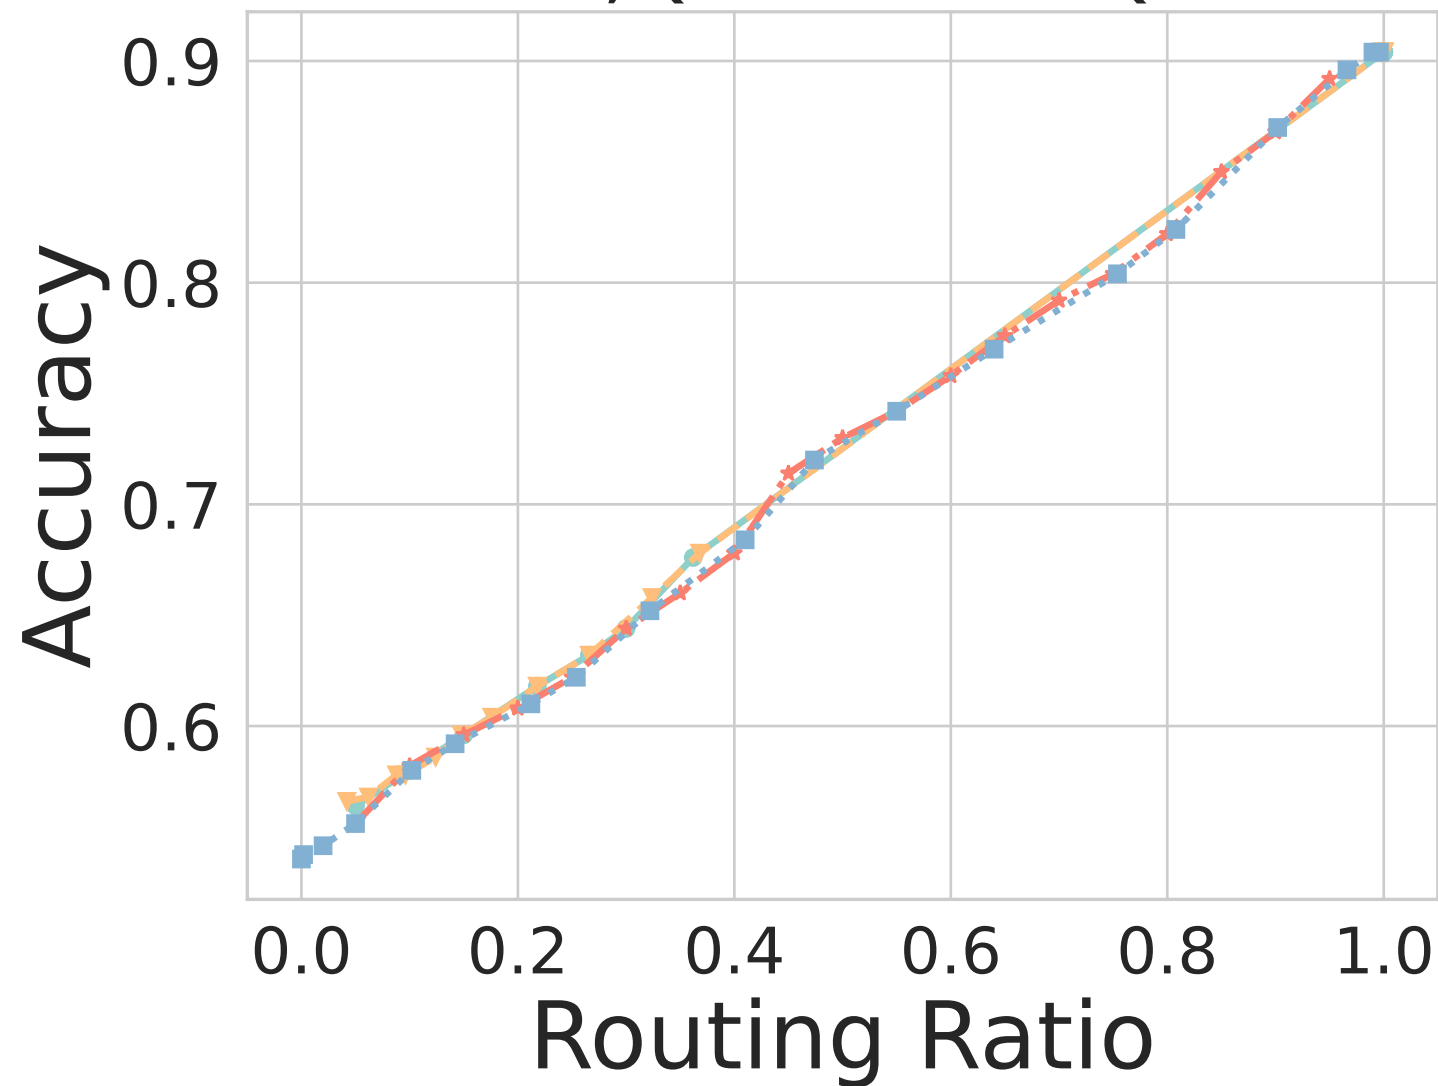

Supplement: supplementary_material [file cali_down_winogrande_Qwen3-0.6B_Qwen_Qwen3-32B.pdf › Routing_SLM_LLMs/Proxy_routing_prediction/to_Qwen_Qwen3-32B/winogrande_as_downstream/cali_down_winogrande_Qwen3-0.6B_Qwen_Qwen3-32B.pdf]

**WinoGrande, Qwen3-1.7B to Qwen3-32B**

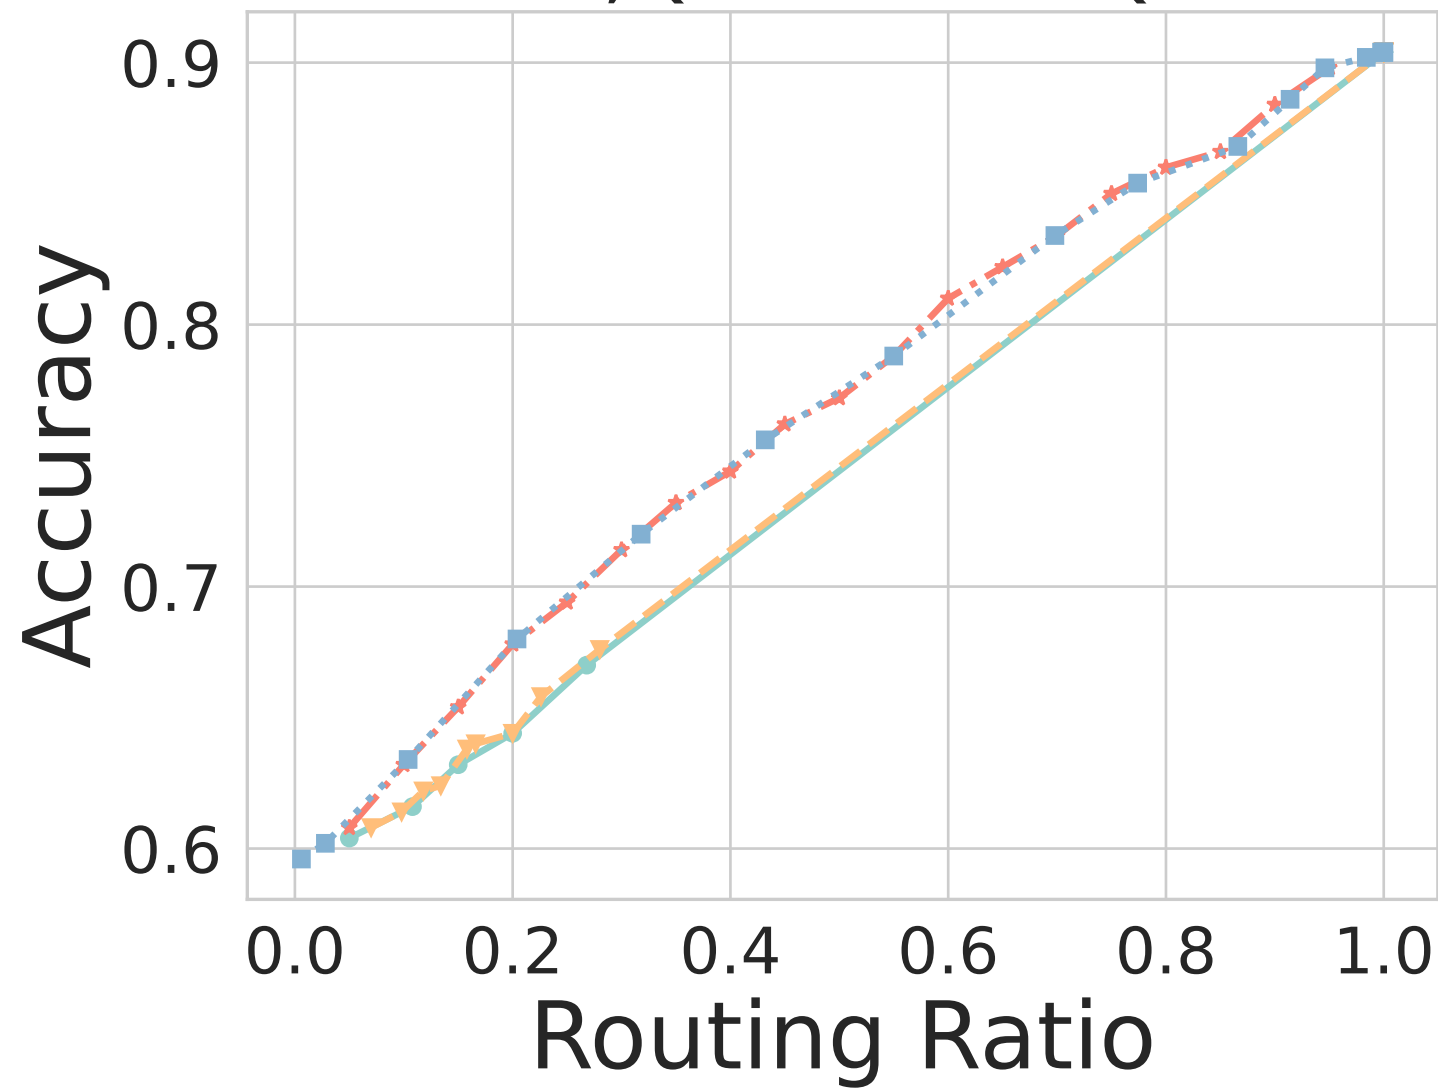

Supplement: supplementary_material [file cali_down_winogrande_Qwen3-1.7B_Qwen_Qwen3-32B.pdf › Routing_SLM_LLMs/Proxy_routing_prediction/to_Qwen_Qwen3-32B/winogrande_as_downstream/cali_down_winogrande_Qwen3-1.7B_Qwen_Qwen3-32B.pdf]

WinoGrande, Qwen3-4B to Qwen3-32B

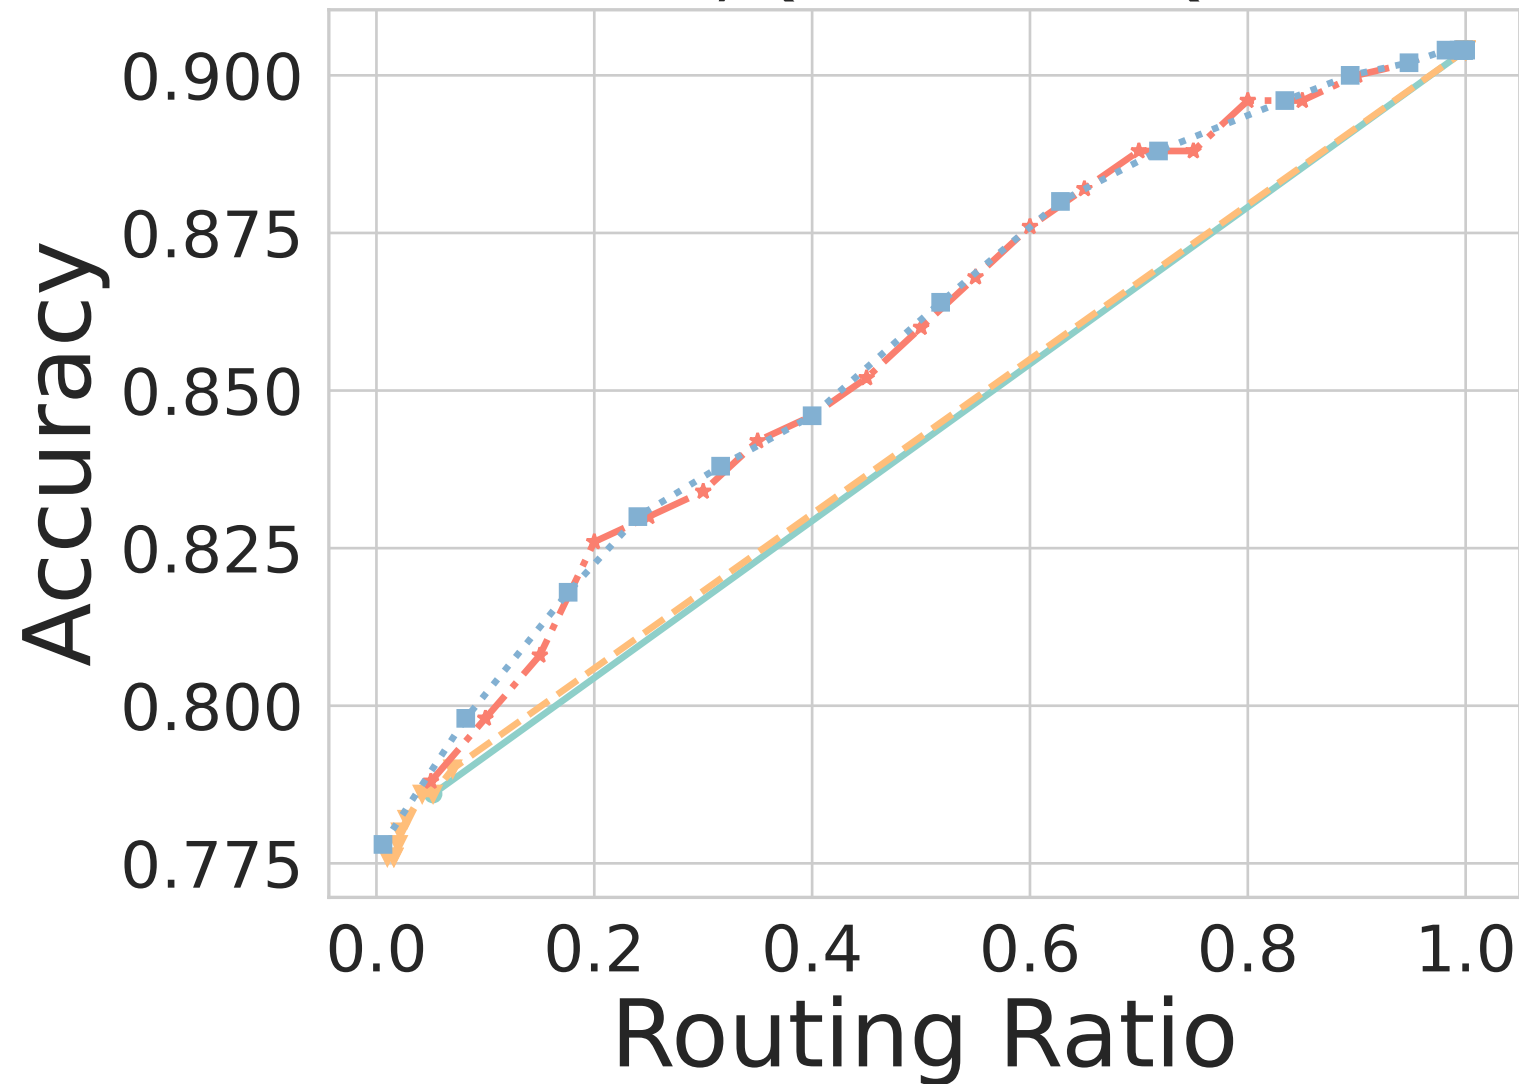

Supplement: supplementary_material [file cali_down_winogrande_Qwen3-4B_Qwen_Qwen3-32B.pdf › Routing_SLM_LLMs/Proxy_routing_prediction/to_Qwen_Qwen3-32B/winogrande_as_downstream/cali_down_winogrande_Qwen3-4B_Qwen_Qwen3-32B.pdf]

**WinoGrande, granite-3.1-8b to Qwen3-32B**

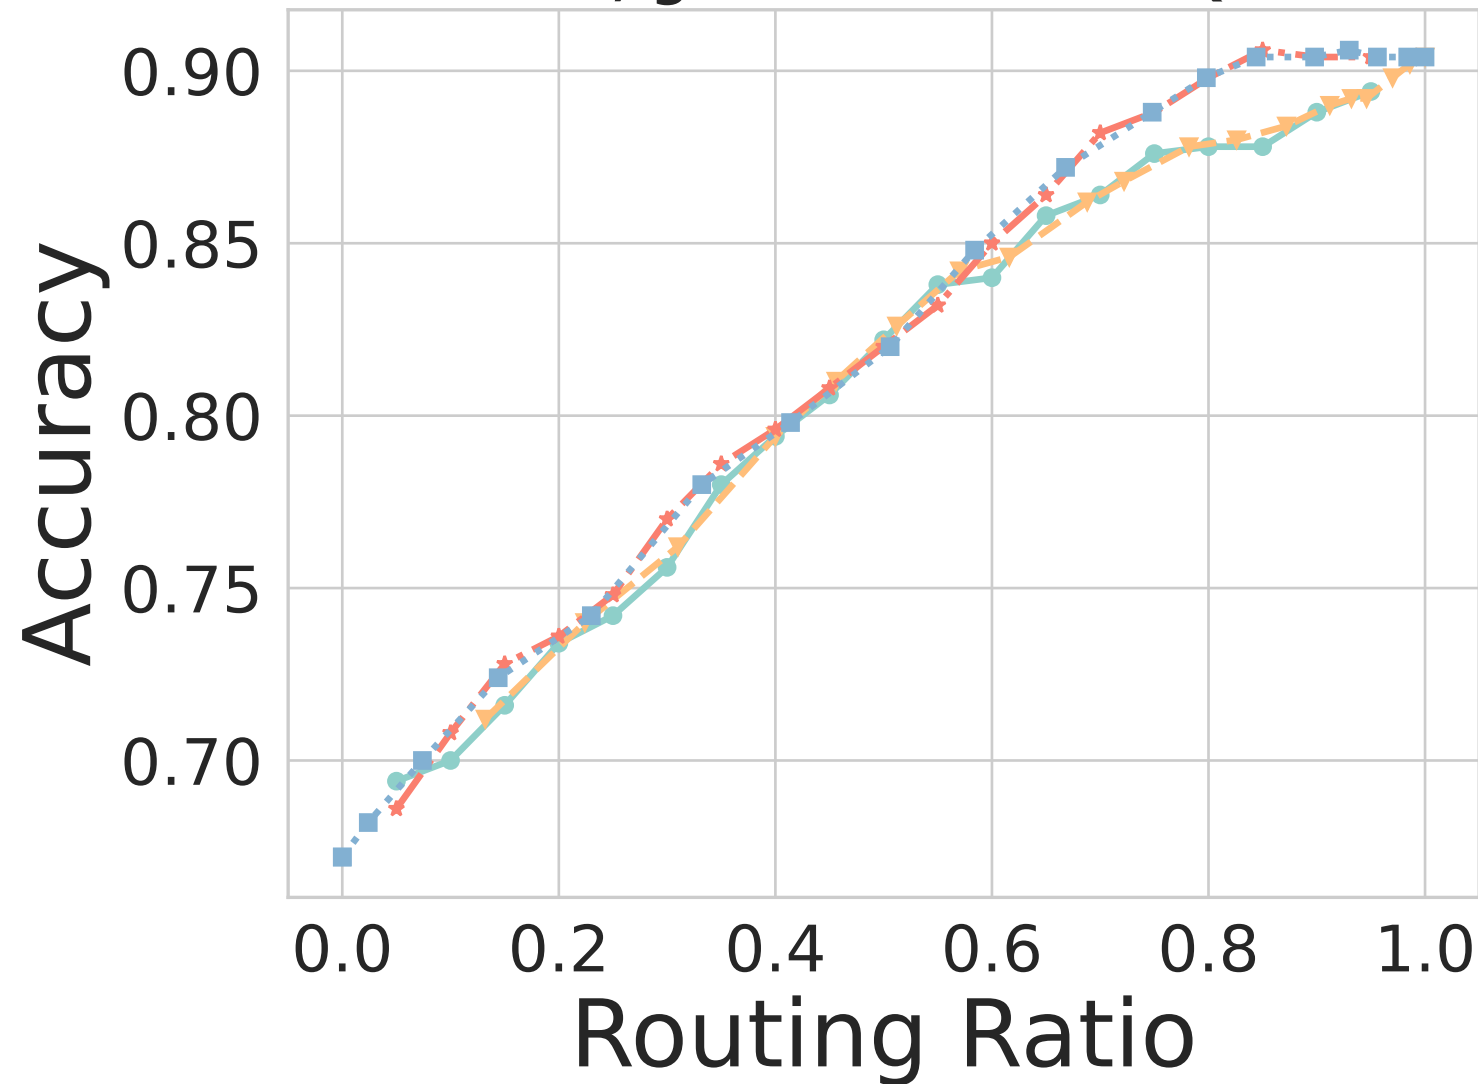

Supplement: supplementary_material [file cali_down_winogrande_granite-3.1-8b_Qwen_Qwen3-32B.pdf › Routing_SLM_LLMs/Proxy_routing_prediction/to_Qwen_Qwen3-32B/winogrande_as_downstream/cali_down_winogrande_granite-3.1-8b_Qwen_Qwen3-32B.pdf]

WinoGrande, llama-3.1-8b to Qwen3-32B

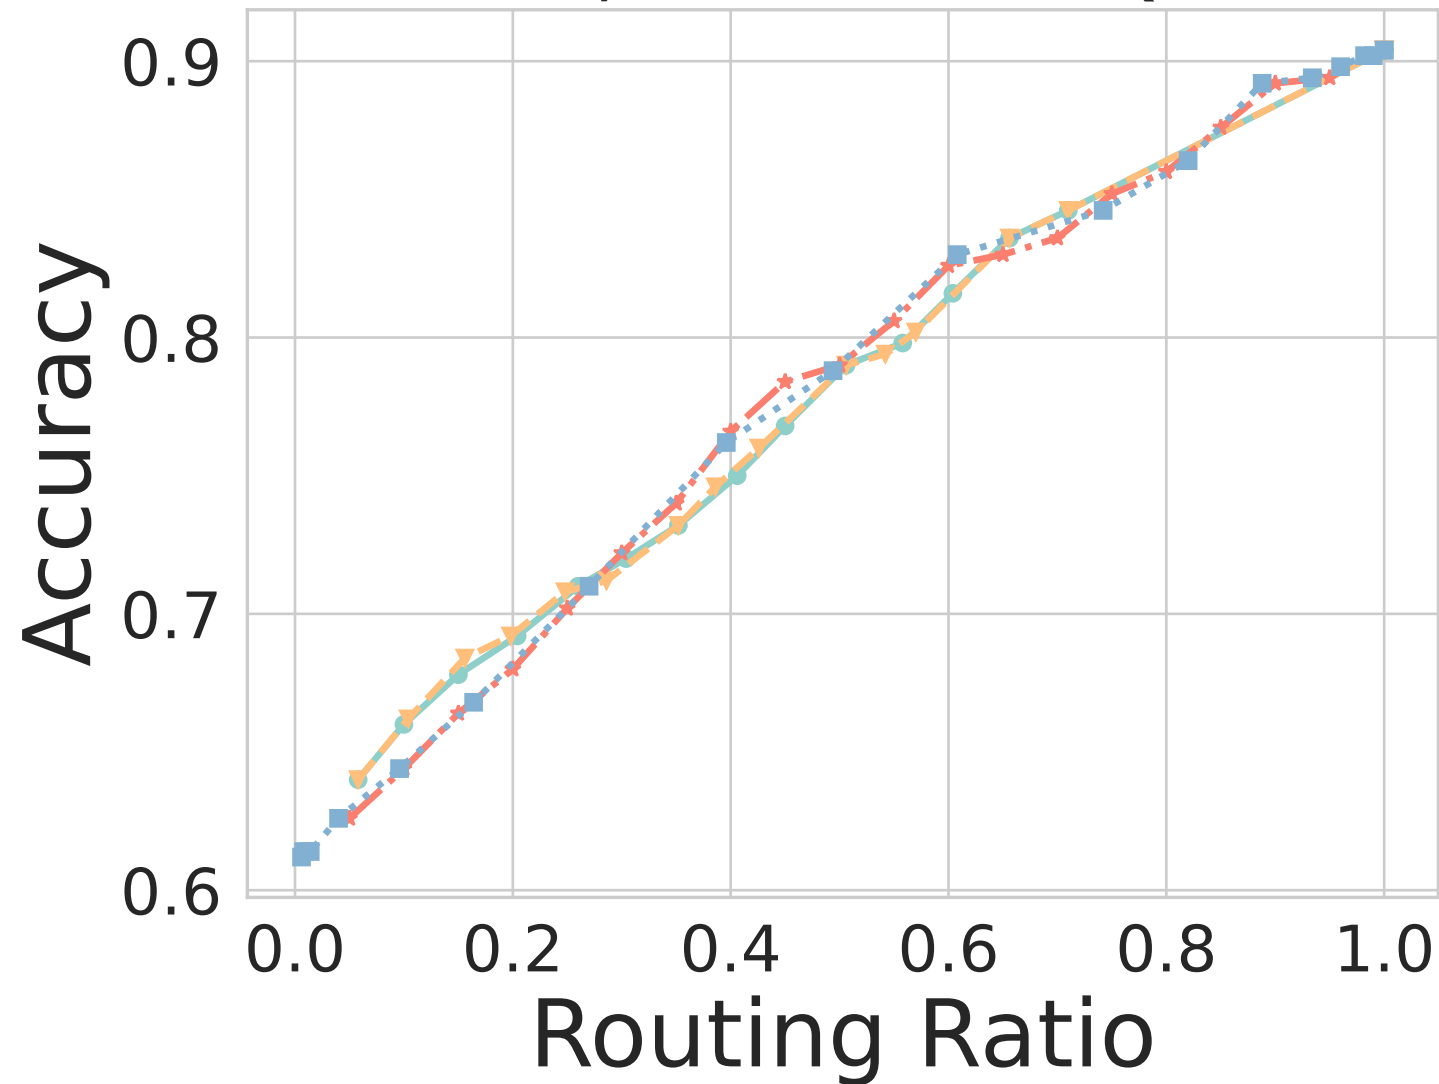

Supplement: supplementary_material [file cali_down_winogrande_llama-3.1-8b_Qwen_Qwen3-32B.pdf › Routing_SLM_LLMs/Proxy_routing_prediction/to_Qwen_Qwen3-32B/winogrande_as_downstream/cali_down_winogrande_llama-3.1-8b_Qwen_Qwen3-32B.pdf]

WinoGrande, llama-3.2-1b to Qwen3-32B

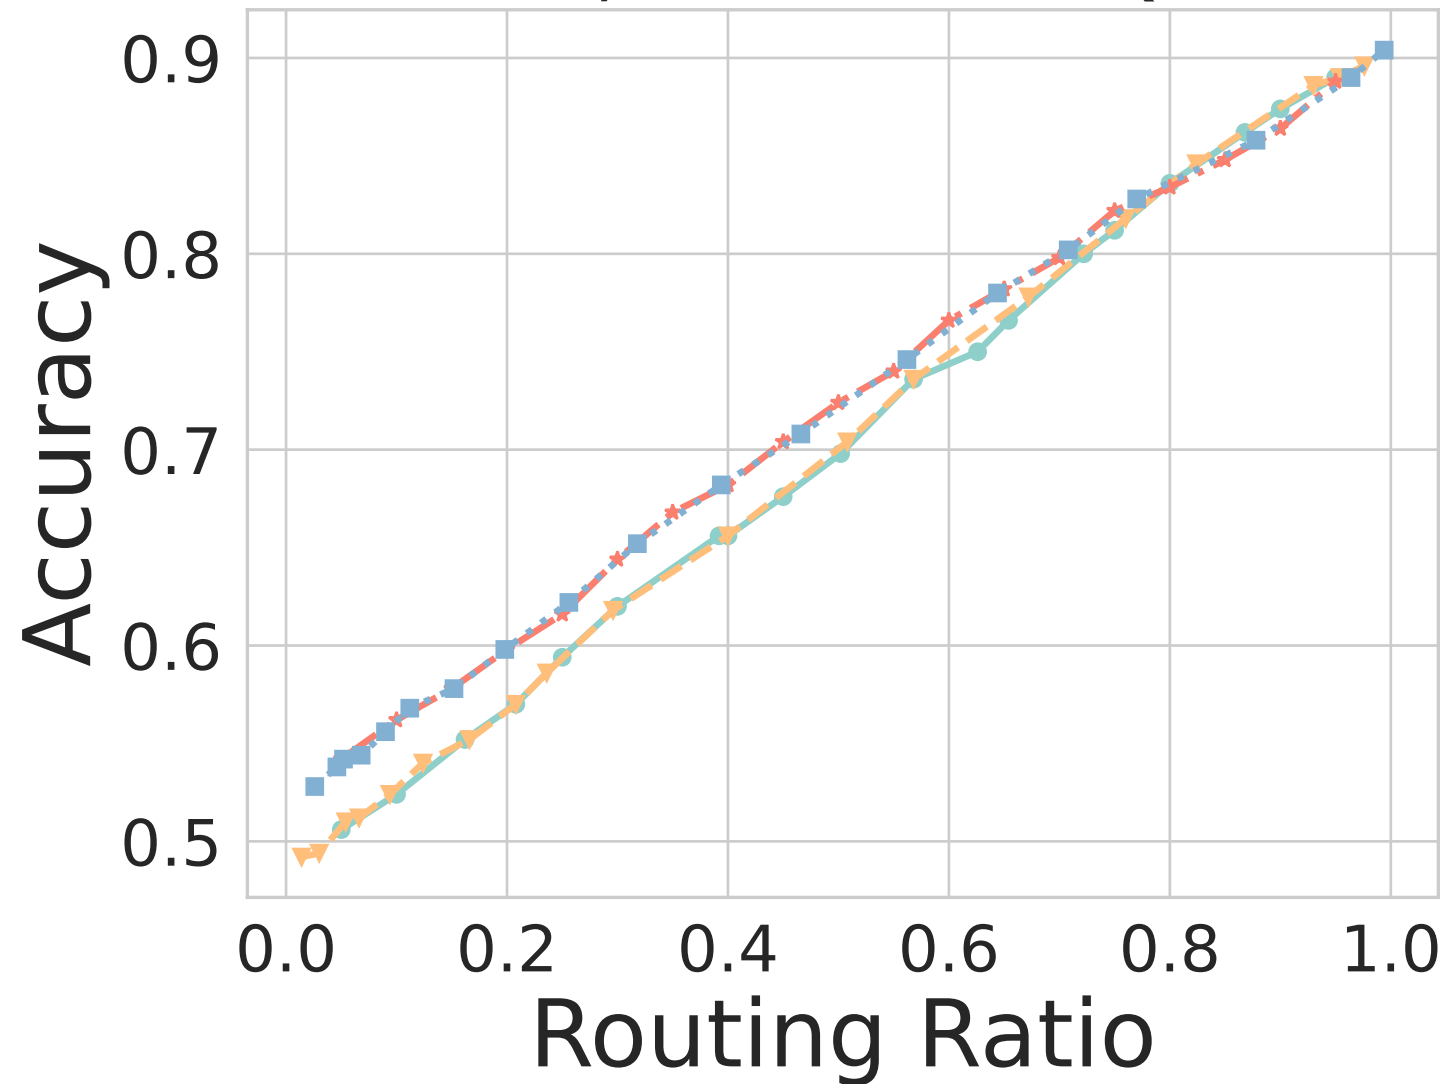

Supplement: supplementary_material [file cali_down_winogrande_llama-3.2-1b_Qwen_Qwen3-32B.pdf › Routing_SLM_LLMs/Proxy_routing_prediction/to_Qwen_Qwen3-32B/winogrande_as_downstream/cali_down_winogrande_llama-3.2-1b_Qwen_Qwen3-32B.pdf]

**WinoGrande, llama-3.2-3b to Qwen3-32B**

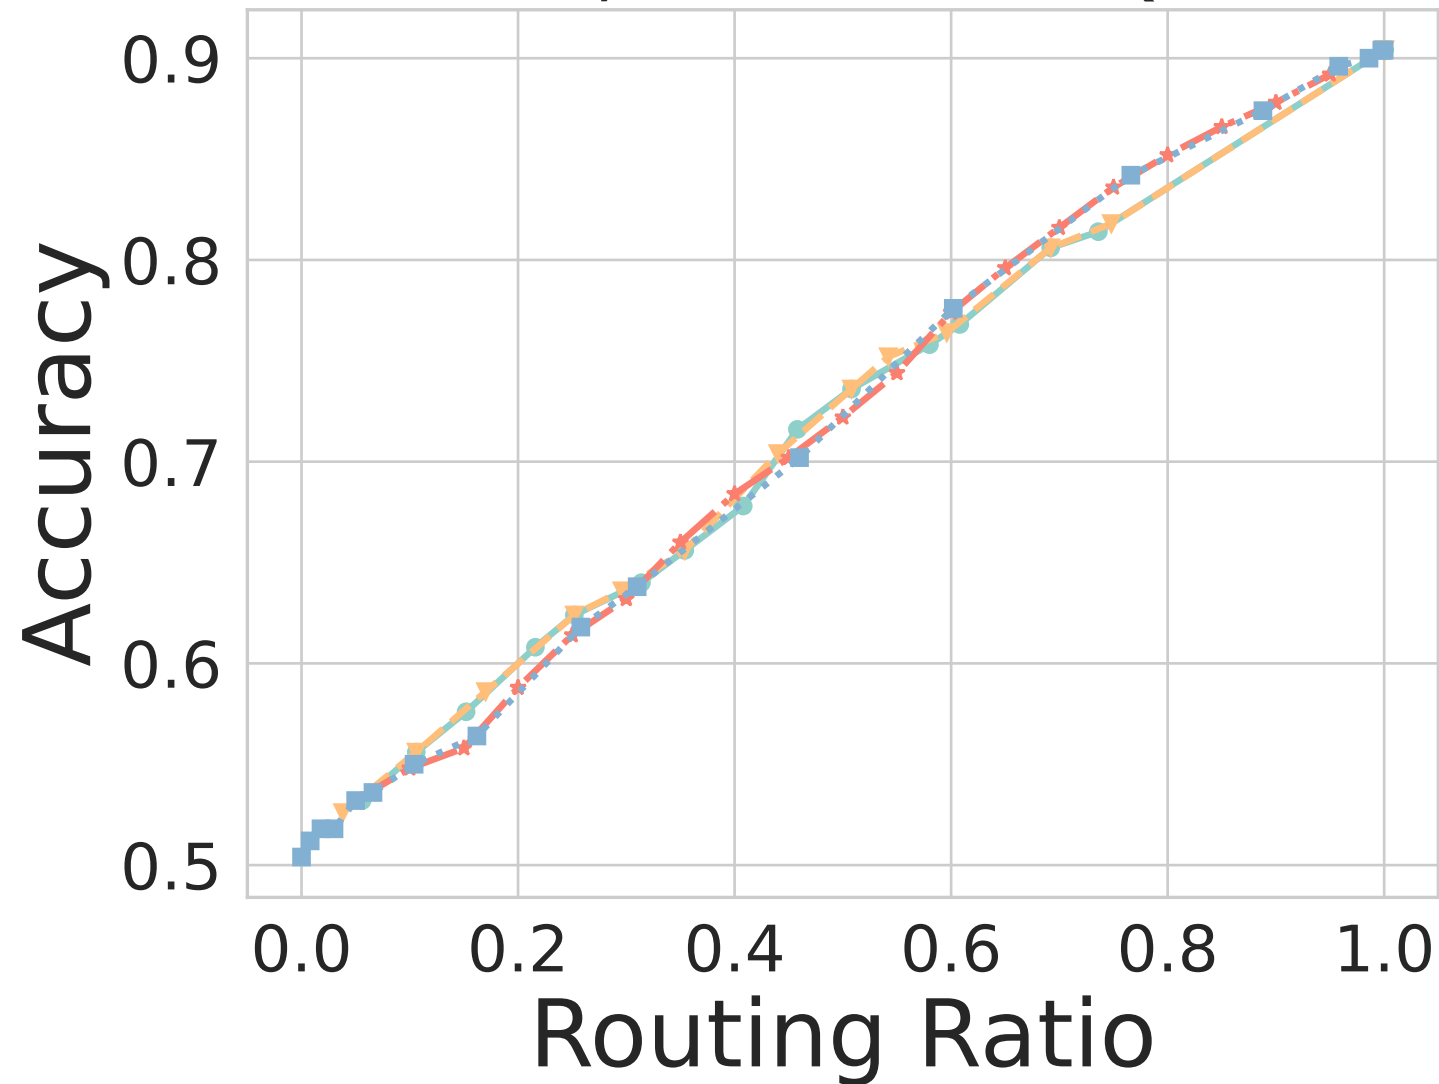

Supplement: supplementary_material [file cali_down_winogrande_llama-3.2-3b_Qwen_Qwen3-32B.pdf › Routing_SLM_LLMs/Proxy_routing_prediction/to_Qwen_Qwen3-32B/winogrande_as_downstream/cali_down_winogrande_llama-3.2-3b_Qwen_Qwen3-32B.pdf]

**WinoGrande, mistral-7b to Qwen3-32B**

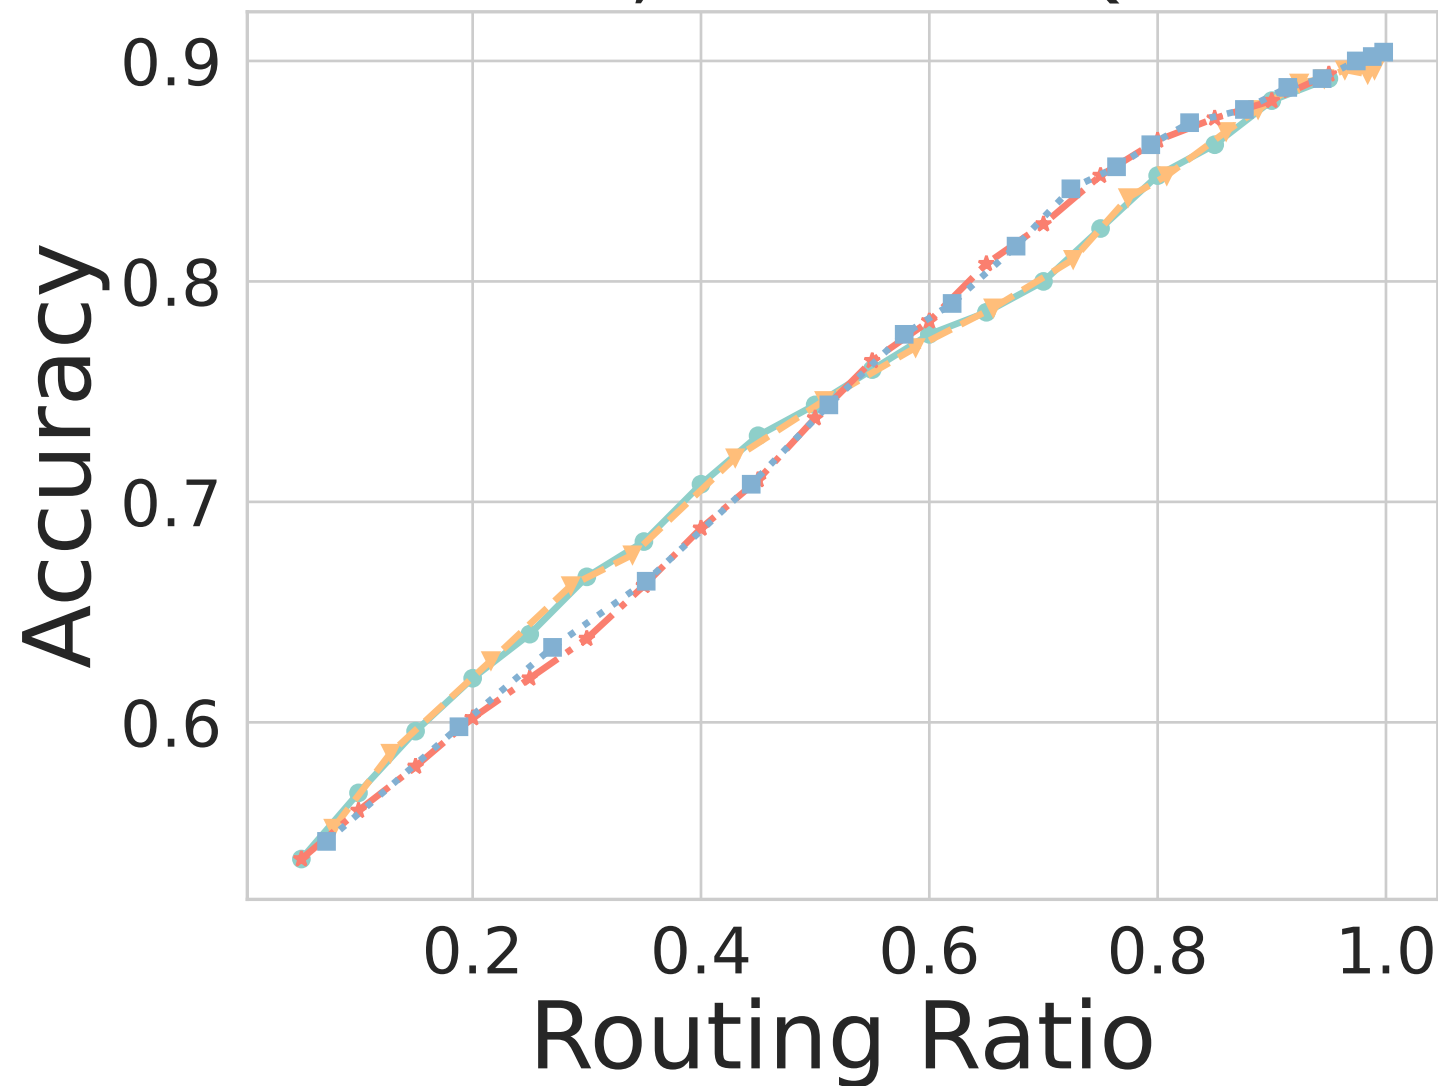

Supplement: supplementary_material [file cali_down_winogrande_mistral-7b_Qwen_Qwen3-32B.pdf › Routing_SLM_LLMs/Proxy_routing_prediction/to_Qwen_Qwen3-32B/winogrande_as_downstream/cali_down_winogrande_mistral-7b_Qwen_Qwen3-32B.pdf]

**WinoGrande, phi-3.5-mini to Qwen3-32B**

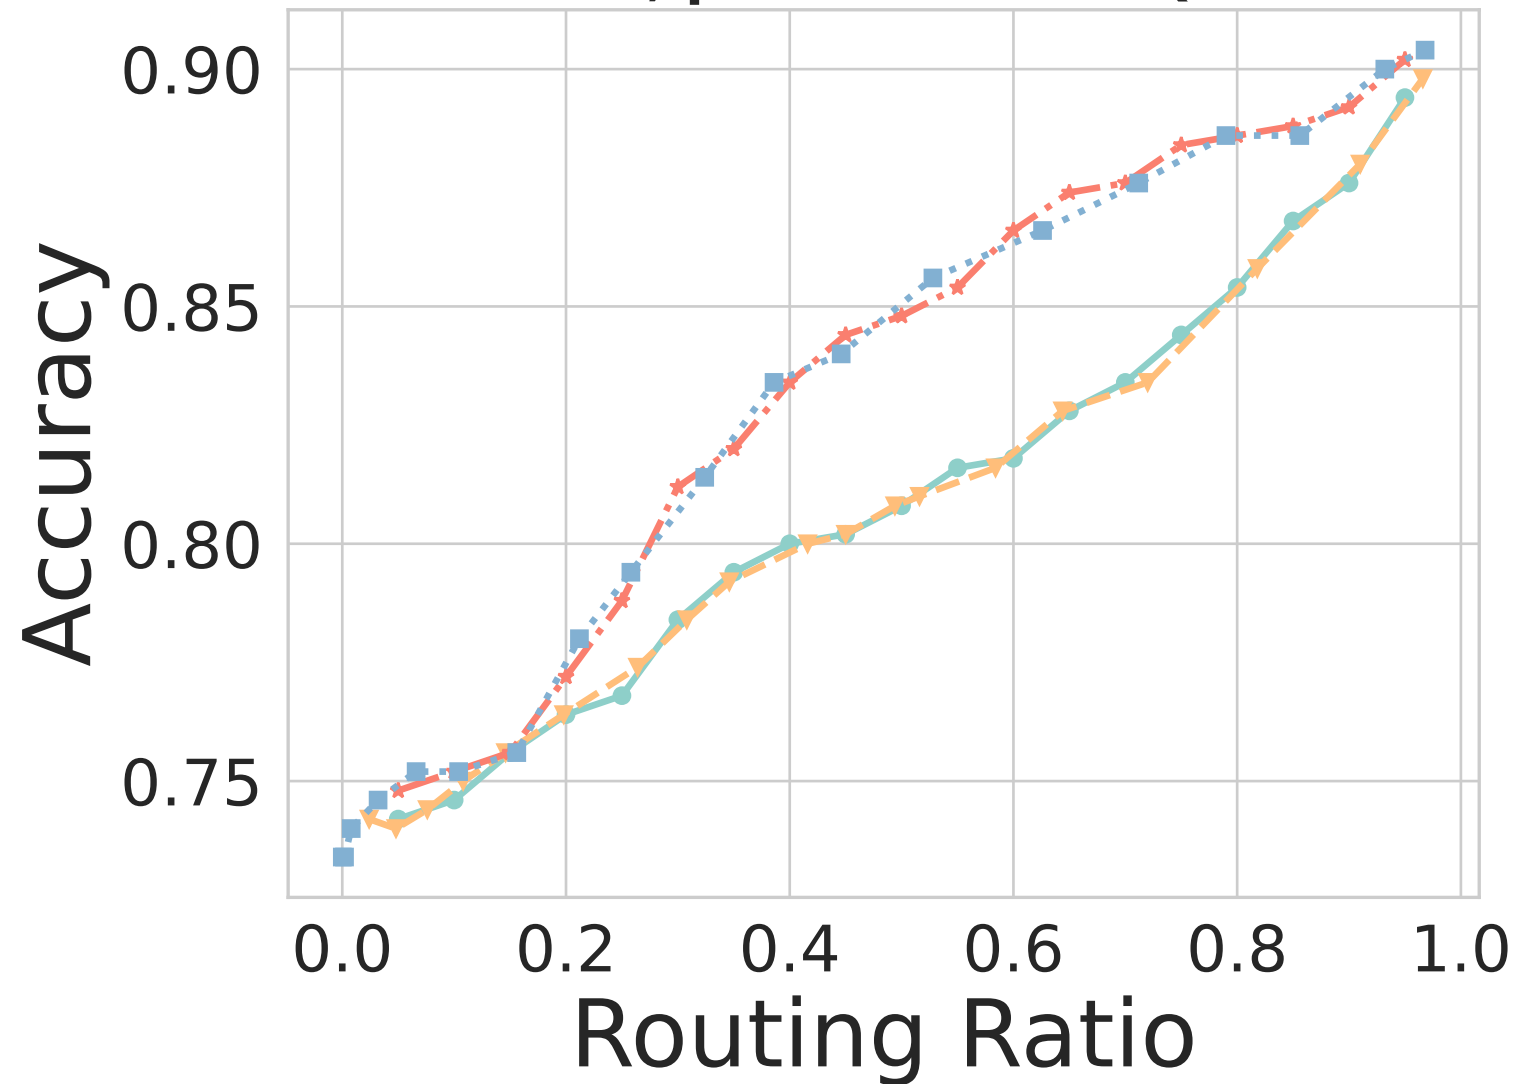

Supplement: supplementary_material [file cali_down_winogrande_phi-3.5-mini_Qwen_Qwen3-32B.pdf › Routing_SLM_LLMs/Proxy_routing_prediction/to_Qwen_Qwen3-32B/winogrande_as_downstream/cali_down_winogrande_phi-3.5-mini_Qwen_Qwen3-32B.pdf]

**WinoGrande, phi-4-mini-reasoning to Qwen3-32B**

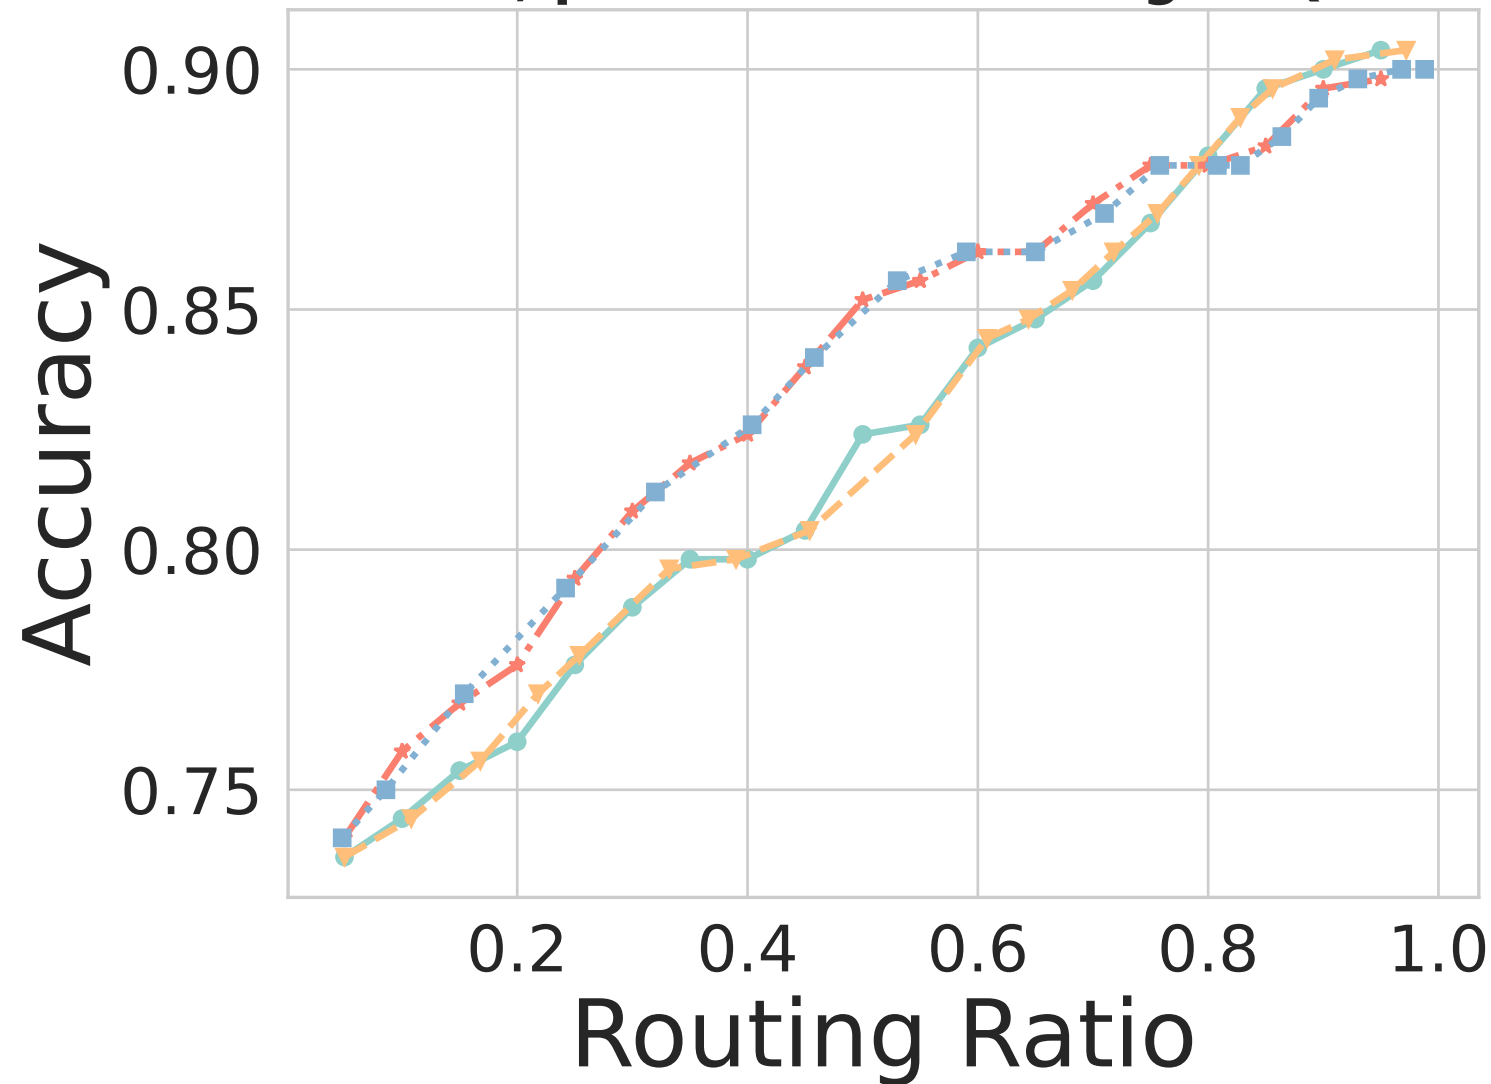

Supplement: supplementary_material [file cali_down_winogrande_phi-4-mini-reasoning_Qwen_Qwen3-32B.pdf › Routing_SLM_LLMs/Proxy_routing_prediction/to_Qwen_Qwen3-32B/winogrande_as_downstream/cali_down_winogrande_phi-4-mini-reasoning_Qwen_Qwen3-32B.pdf]

WinoGrande, qwen-2.5-7b to Qwen3-32B

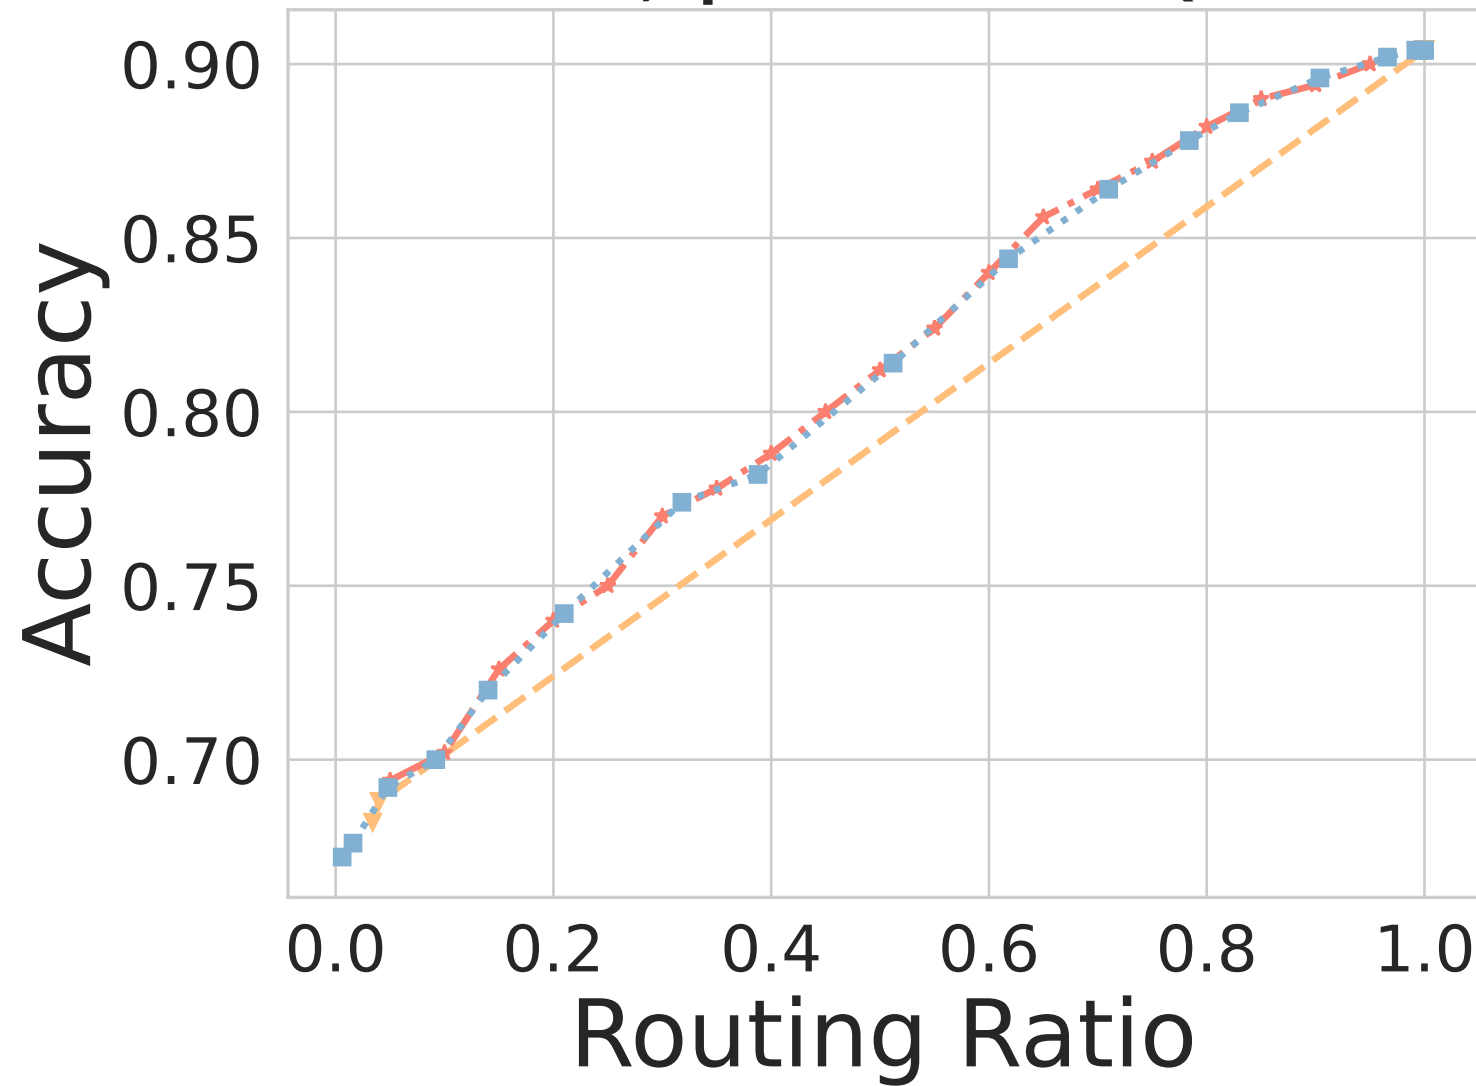

Supplement: supplementary_material [file cali_down_winogrande_qwen-2.5-7b_Qwen_Qwen3-32B.pdf › Routing_SLM_LLMs/Proxy_routing_prediction/to_Qwen_Qwen3-32B/winogrande_as_downstream/cali_down_winogrande_qwen-2.5-7b_Qwen_Qwen3-32B.pdf]

**WinoGrande, rwkv to Qwen3-32B**

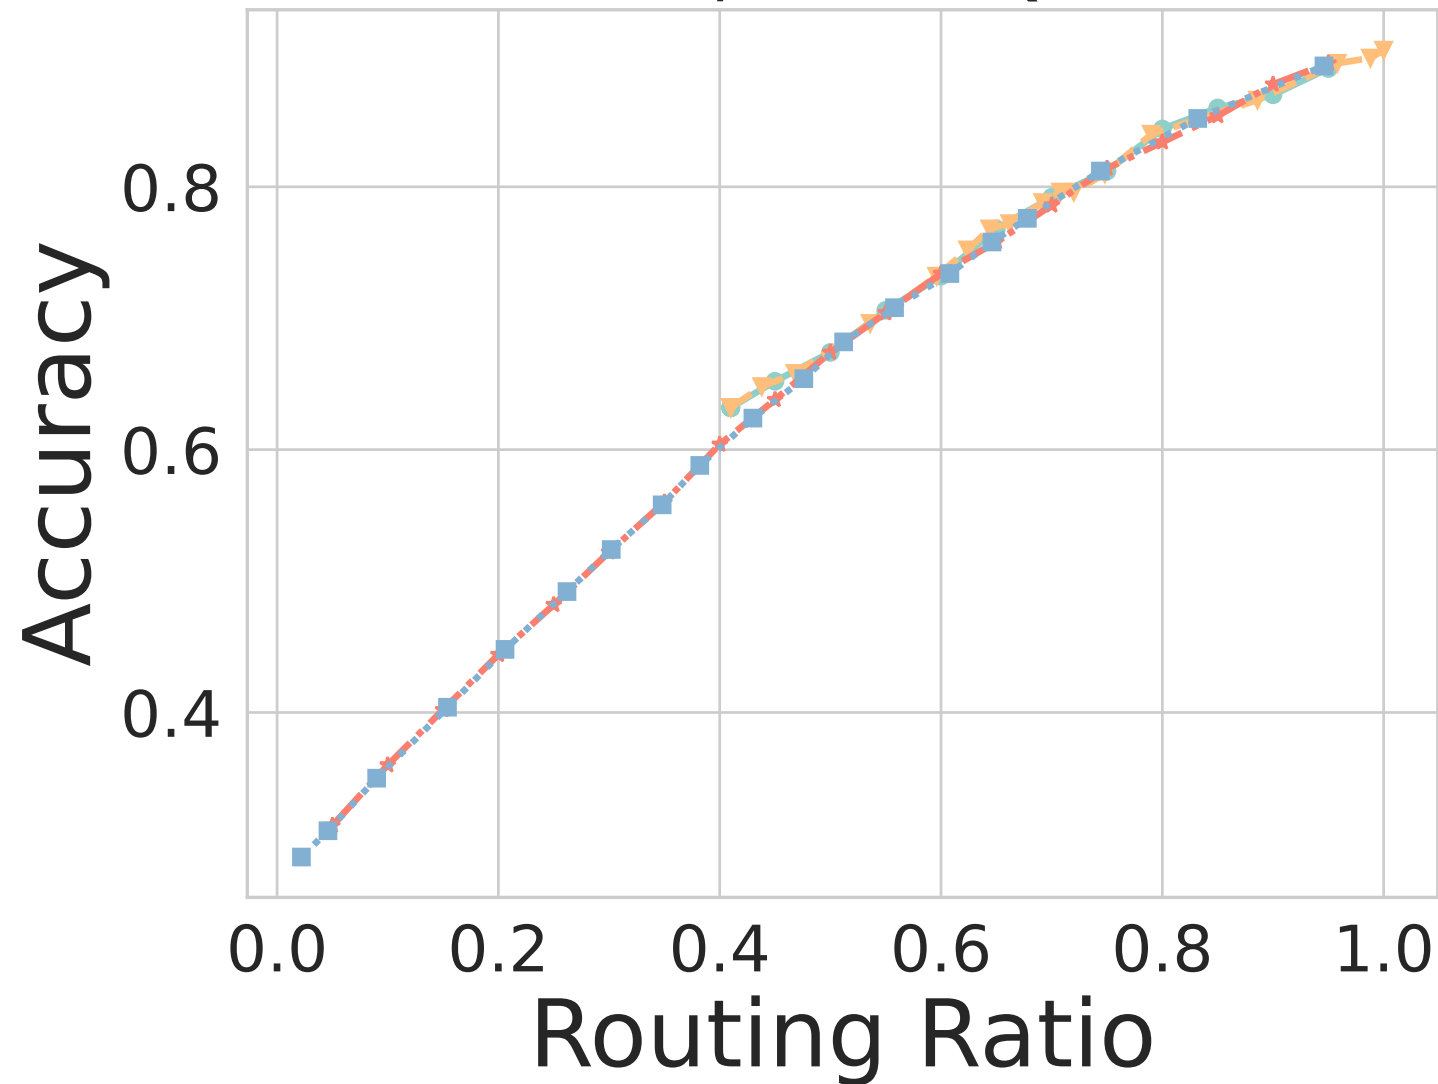

Supplement: supplementary_material [file cali_down_winogrande_rwkv_Qwen_Qwen3-32B.pdf › Routing_SLM_LLMs/Proxy_routing_prediction/to_Qwen_Qwen3-32B/winogrande_as_downstream/cali_down_winogrande_rwkv_Qwen_Qwen3-32B.pdf]

**AQuA, Qwen3-0.6B to DeepSeek-R1**

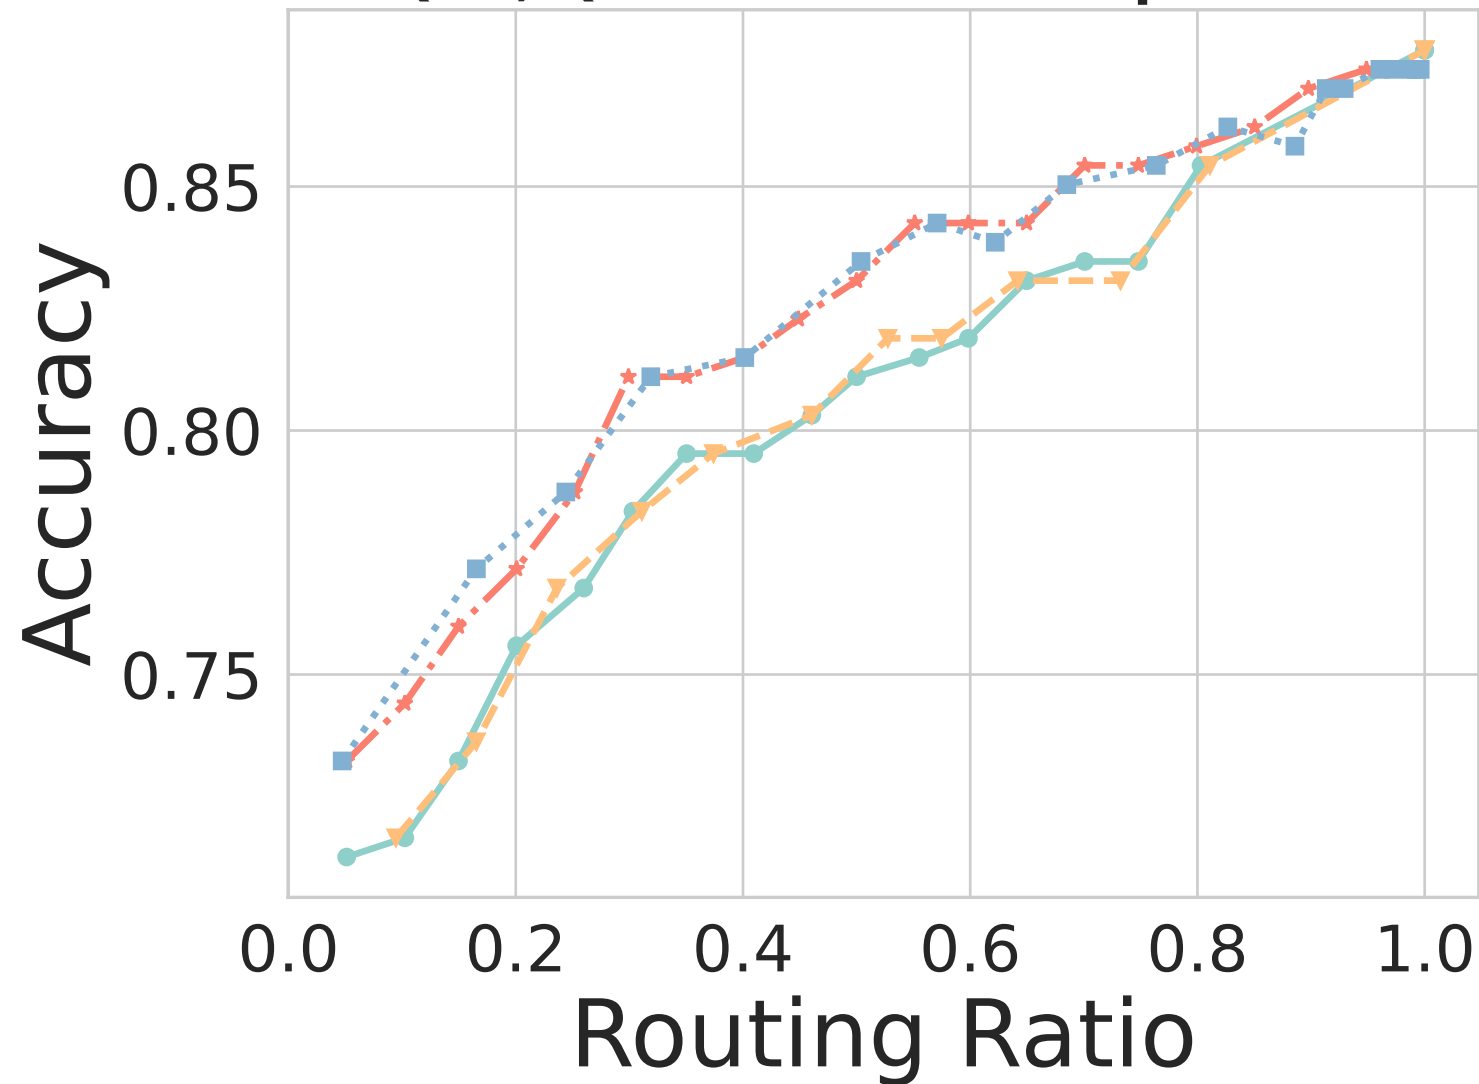

Supplement: supplementary_material [file cali_down_aqua_Qwen3-0.6B_deepseek-reasoner.pdf › Routing_SLM_LLMs/Proxy_routing_prediction/to_deepseek-reasoner/aqua_as_downstream/cali_down_aqua_Qwen3-0.6B_deepseek-reasoner.pdf]

**AQuA, Qwen3-1.7B to DeepSeek-R1**

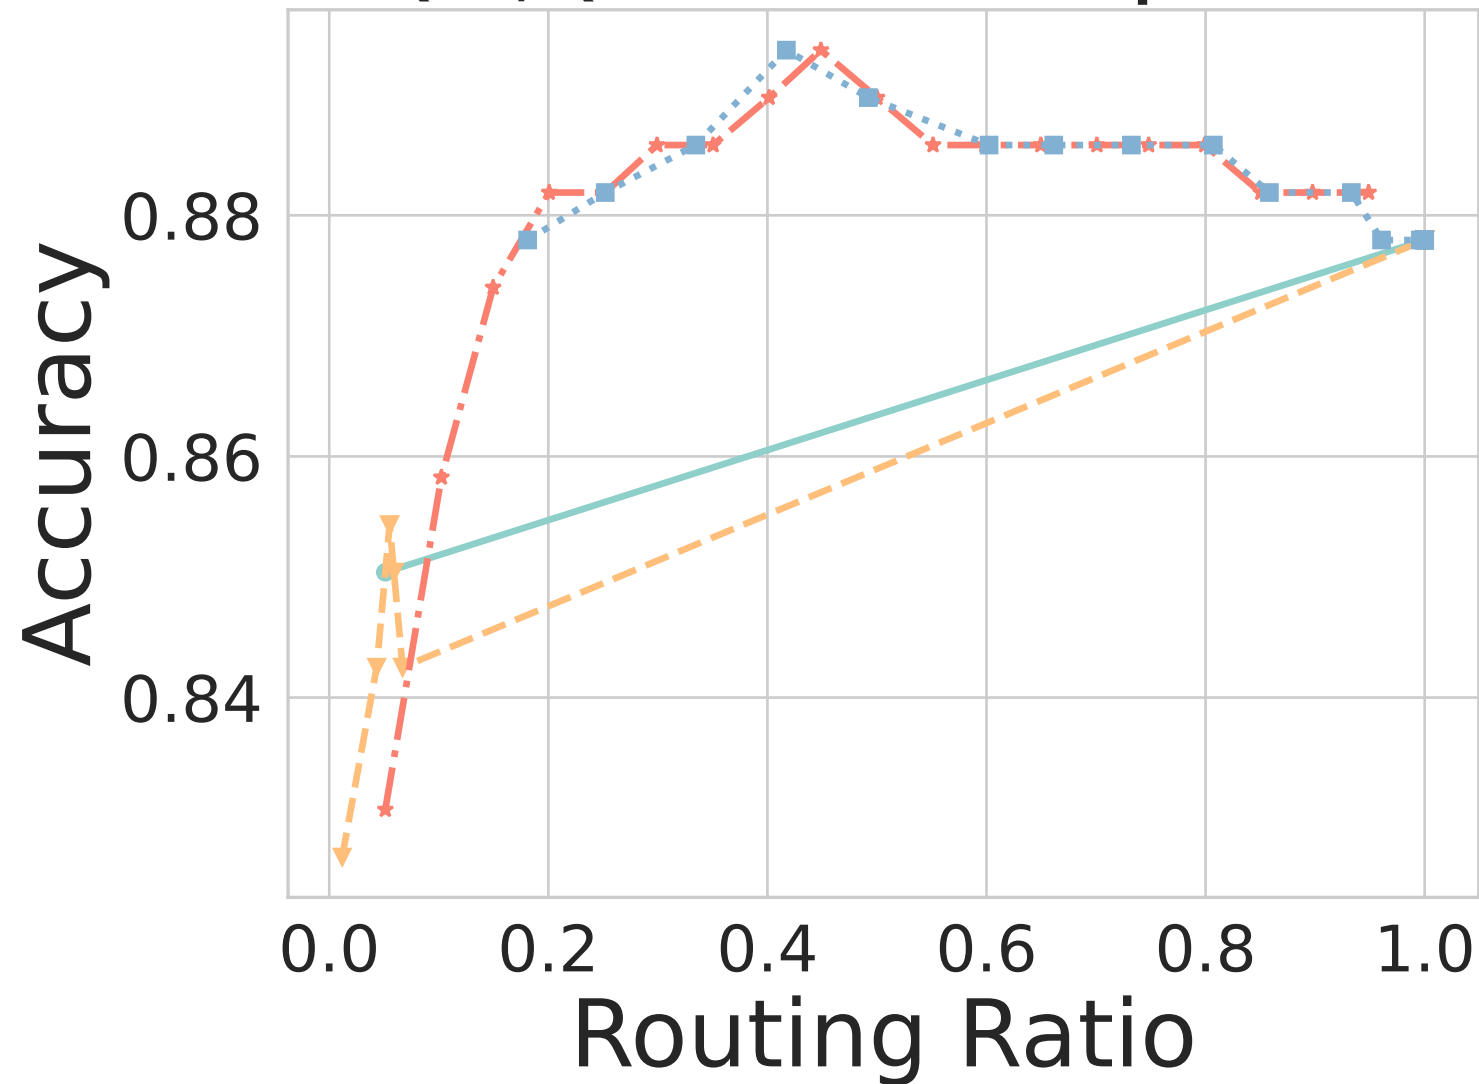

Supplement: supplementary_material [file cali_down_aqua_Qwen3-1.7B_deepseek-reasoner.pdf › Routing_SLM_LLMs/Proxy_routing_prediction/to_deepseek-reasoner/aqua_as_downstream/cali_down_aqua_Qwen3-1.7B_deepseek-reasoner.pdf]

**AQuA, Qwen3-4B to DeepSeek-R1**

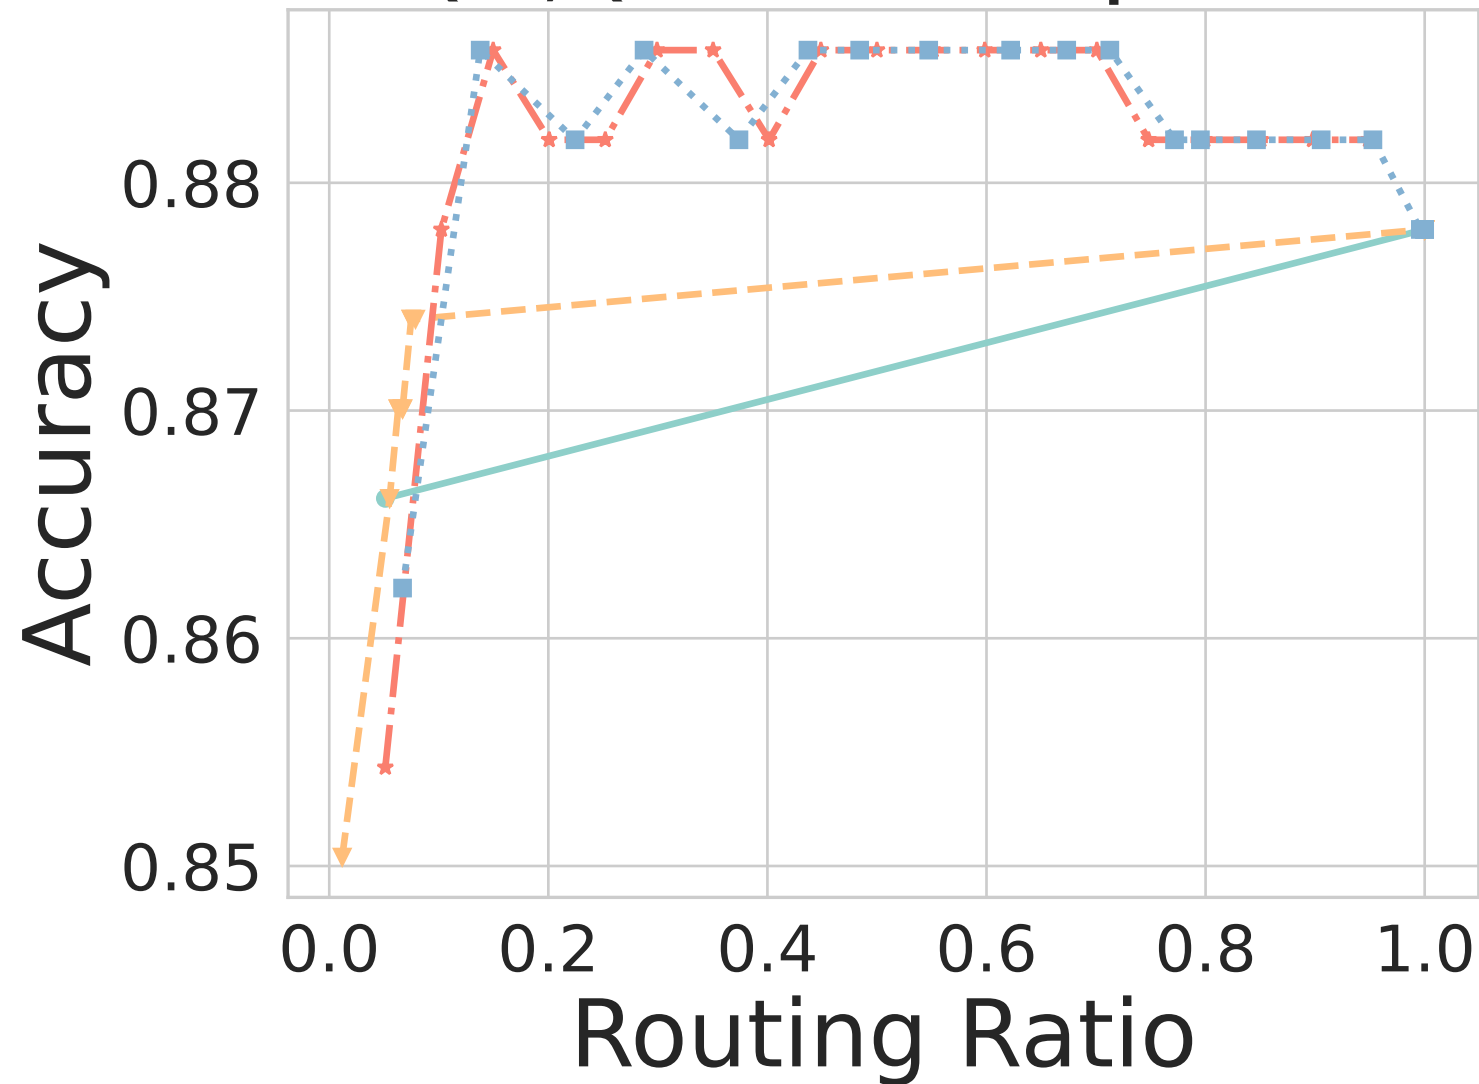

Supplement: supplementary_material [file cali_down_aqua_Qwen3-4B_deepseek-reasoner.pdf › Routing_SLM_LLMs/Proxy_routing_prediction/to_deepseek-reasoner/aqua_as_downstream/cali_down_aqua_Qwen3-4B_deepseek-reasoner.pdf]

**AQuA, granite-3.1-8b to DeepSeek-R1**

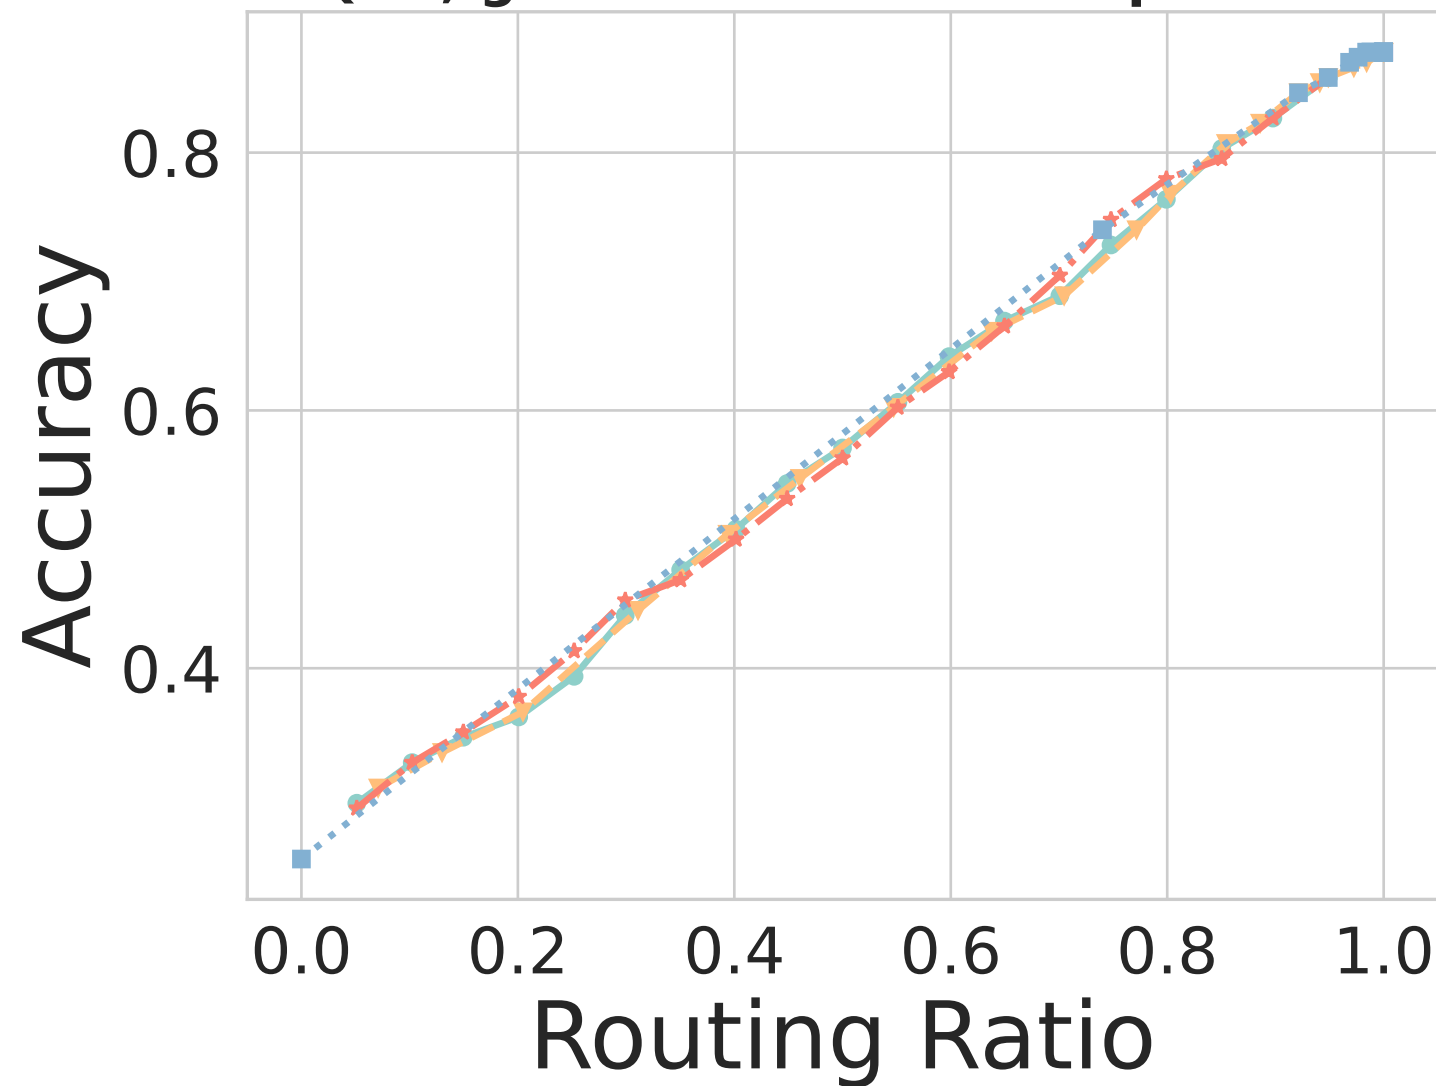

Supplement: supplementary_material [file cali_down_aqua_granite-3.1-8b_deepseek-reasoner.pdf › Routing_SLM_LLMs/Proxy_routing_prediction/to_deepseek-reasoner/aqua_as_downstream/cali_down_aqua_granite-3.1-8b_deepseek-reasoner.pdf]

**AQuA, llama-3.1-8b to DeepSeek-R1**

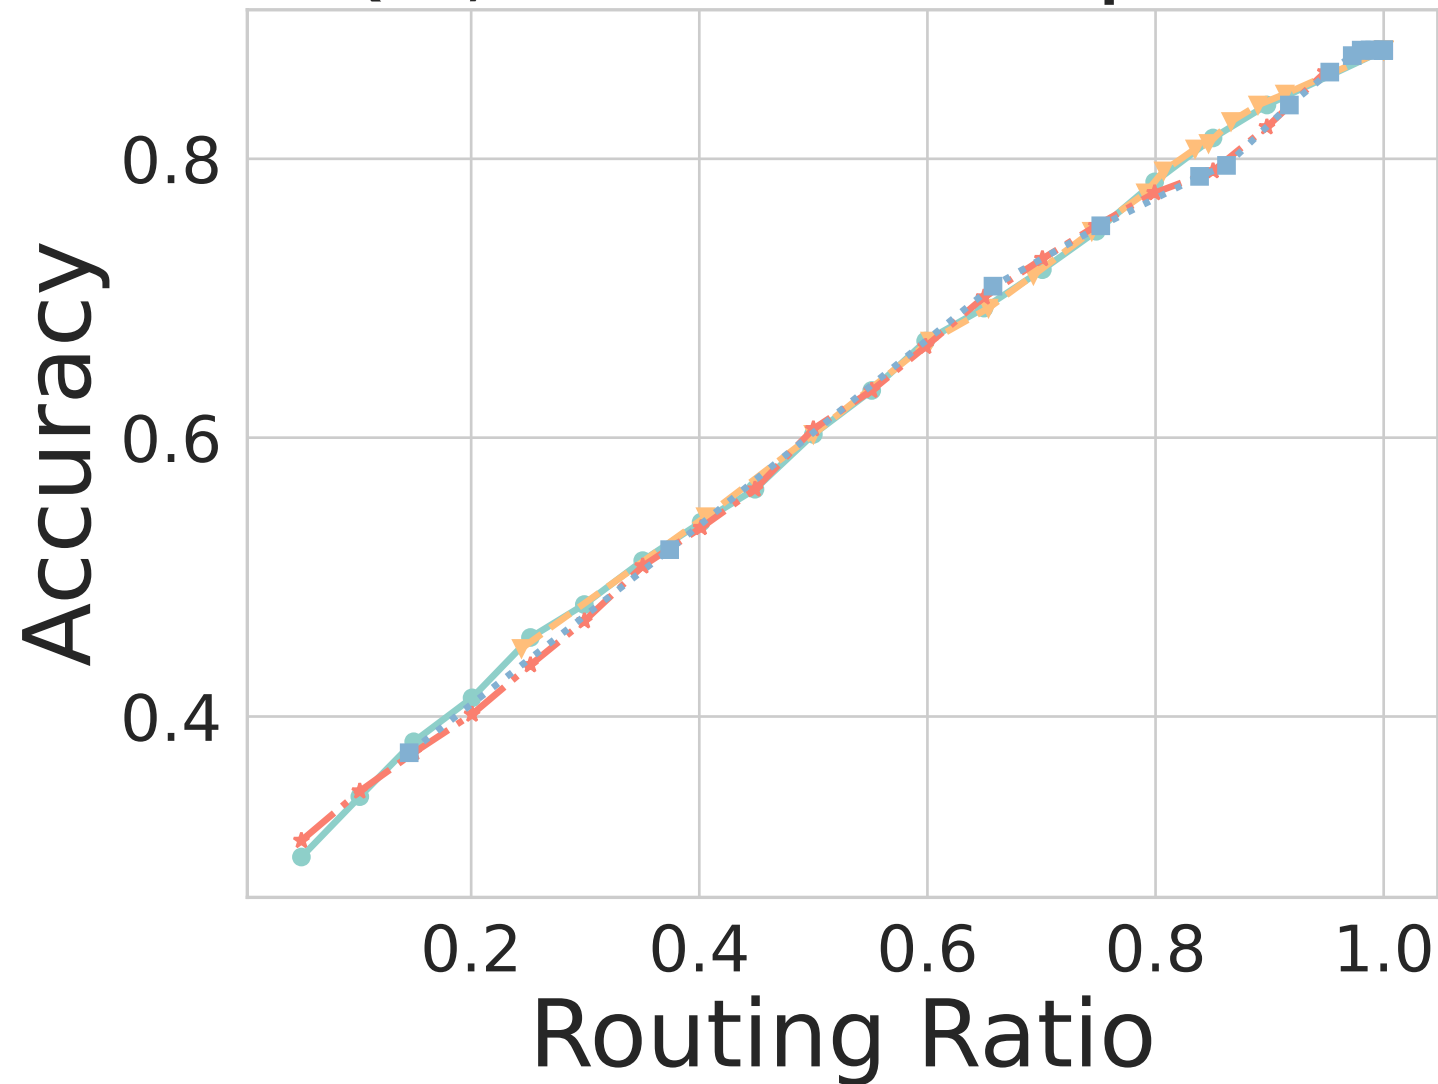

Supplement: supplementary_material [file cali_down_aqua_llama-3.1-8b_deepseek-reasoner.pdf › Routing_SLM_LLMs/Proxy_routing_prediction/to_deepseek-reasoner/aqua_as_downstream/cali_down_aqua_llama-3.1-8b_deepseek-reasoner.pdf]

**AQuA, llama-3.2-1b to DeepSeek-R1**

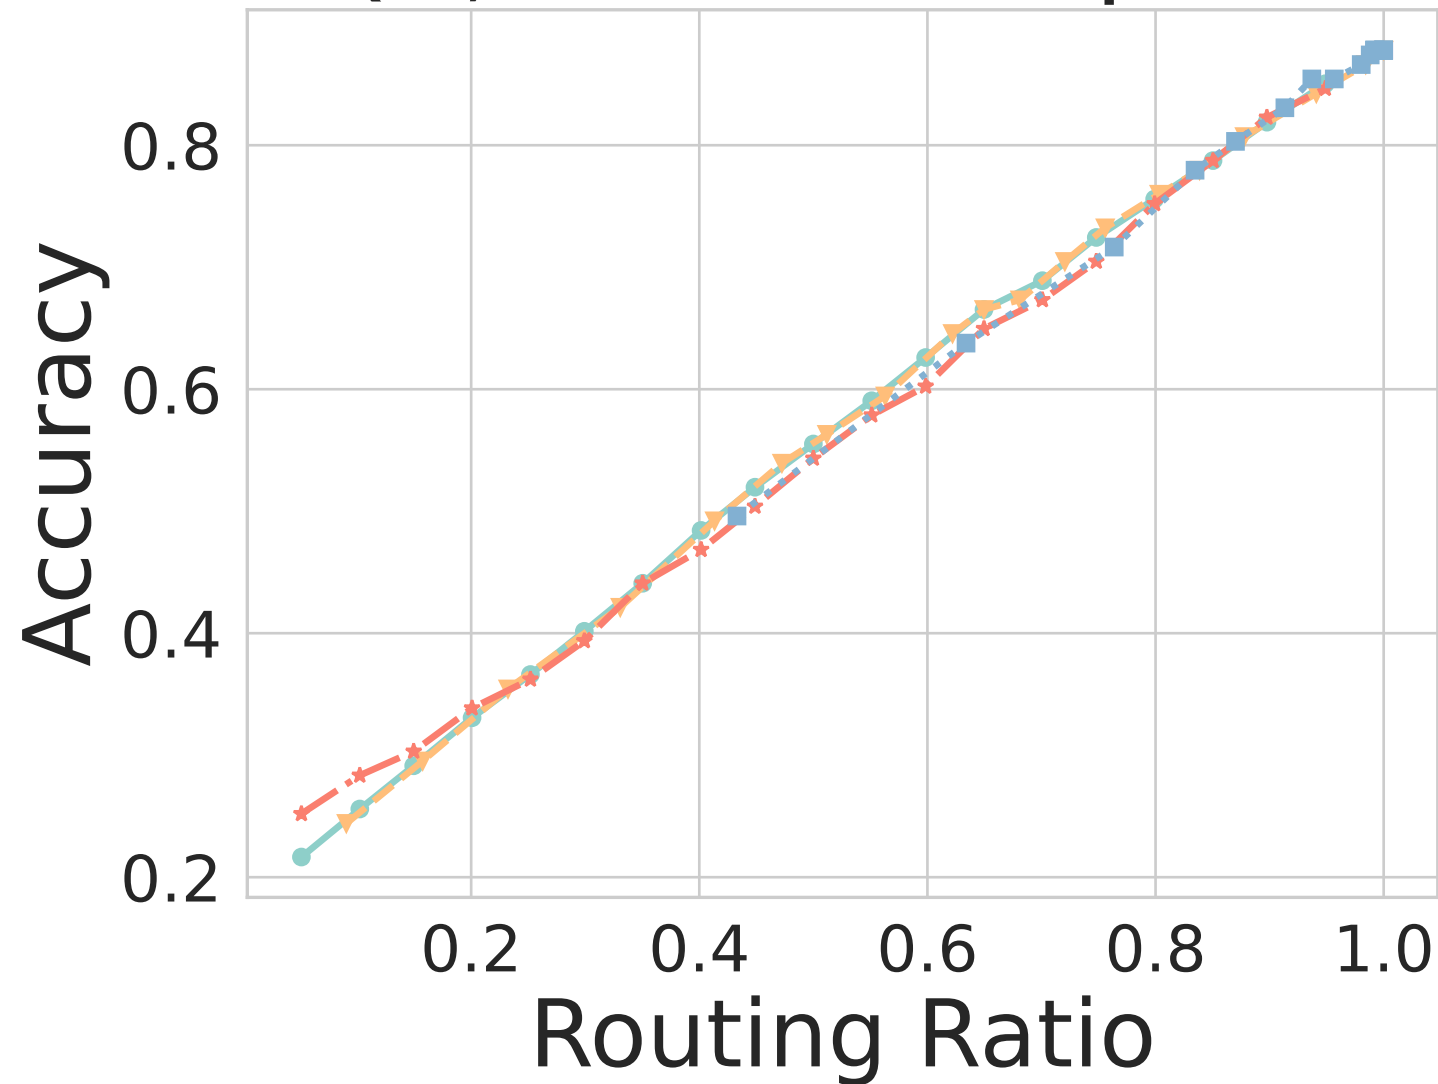

Supplement: supplementary_material [file cali_down_aqua_llama-3.2-1b_deepseek-reasoner.pdf › Routing_SLM_LLMs/Proxy_routing_prediction/to_deepseek-reasoner/aqua_as_downstream/cali_down_aqua_llama-3.2-1b_deepseek-reasoner.pdf]

**AQuA, llama-3.2-3b to DeepSeek-R1**

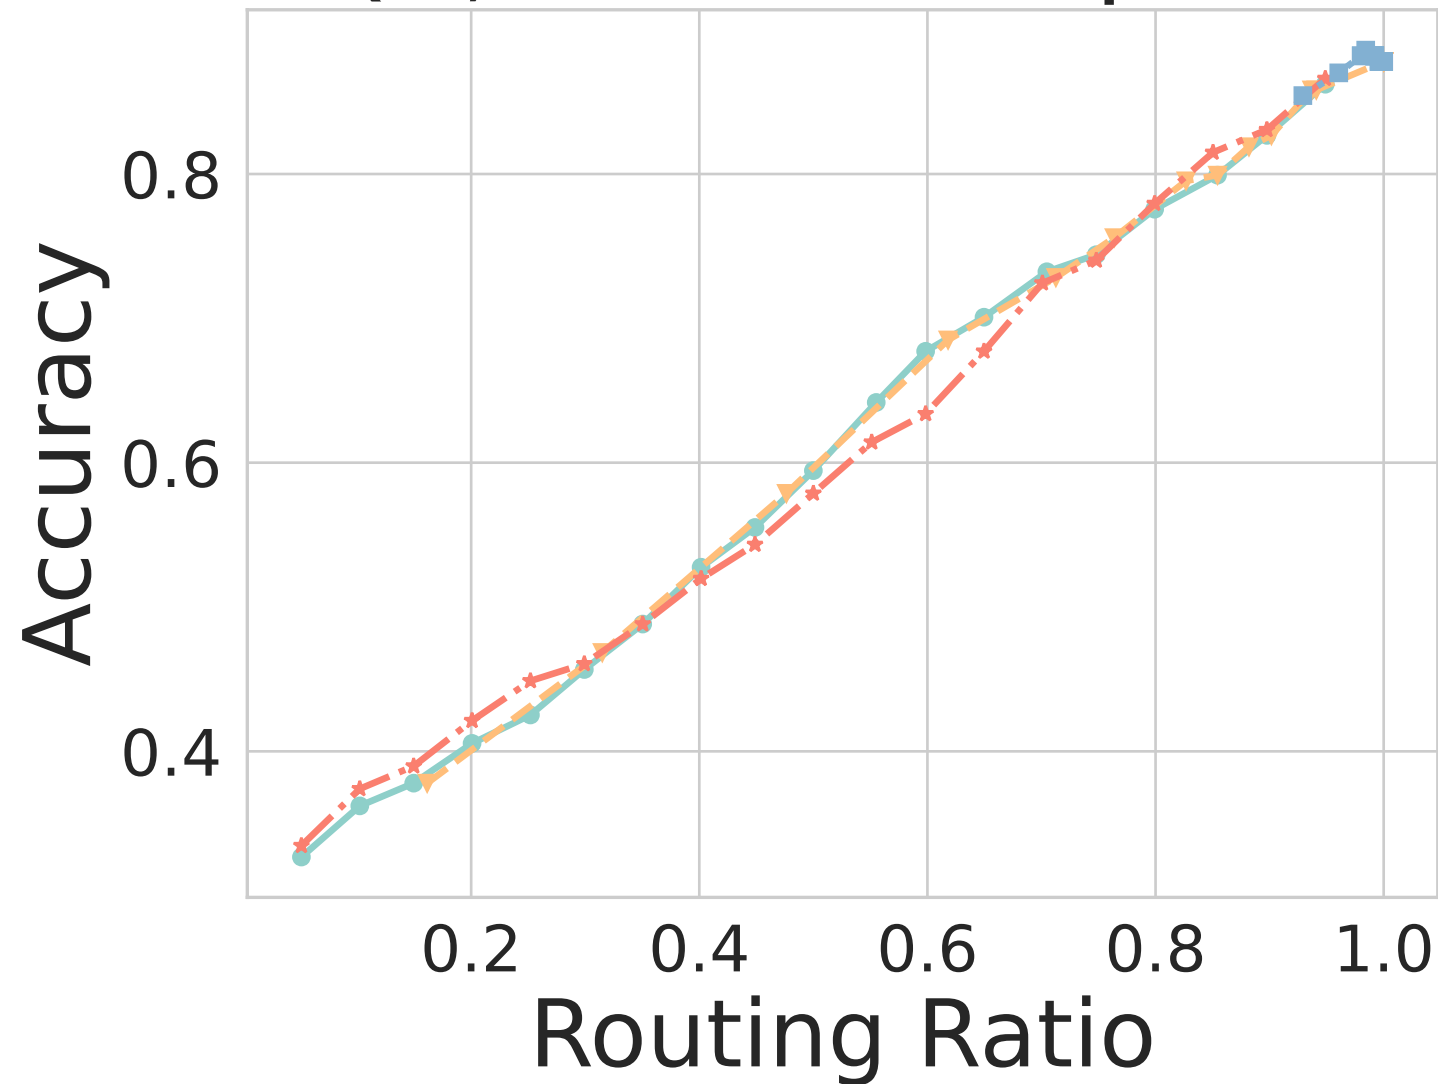

Supplement: supplementary_material [file cali_down_aqua_llama-3.2-3b_deepseek-reasoner.pdf › Routing_SLM_LLMs/Proxy_routing_prediction/to_deepseek-reasoner/aqua_as_downstream/cali_down_aqua_llama-3.2-3b_deepseek-reasoner.pdf]

**AQuA, mistral-7b to DeepSeek-R1**

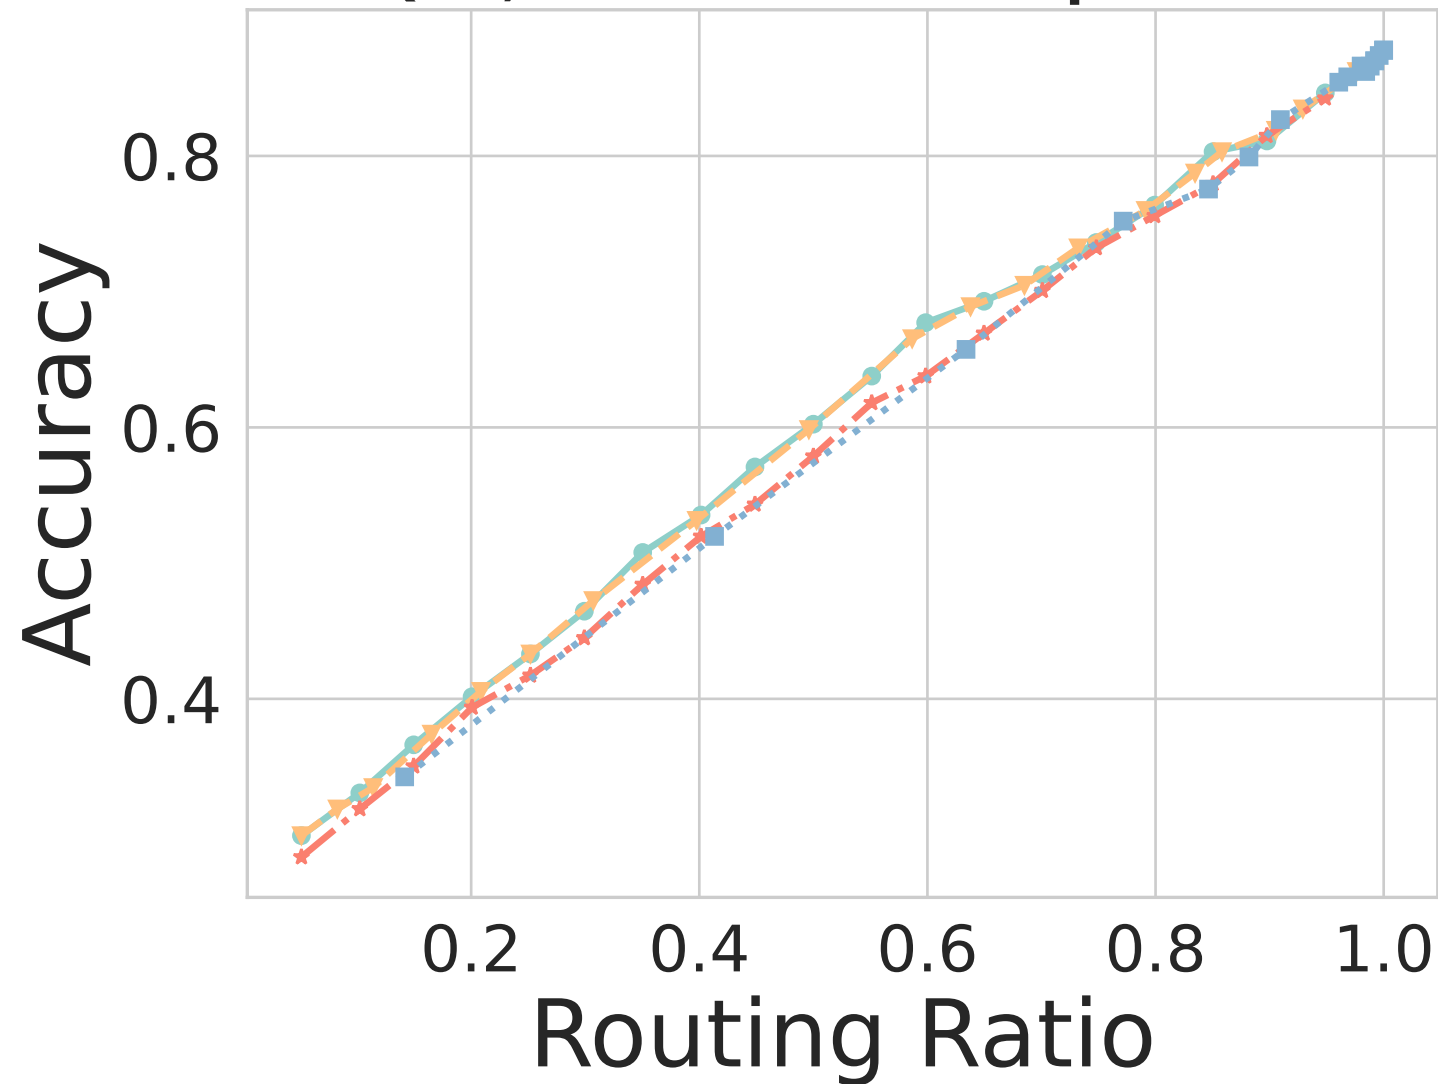

Supplement: supplementary_material [file cali_down_aqua_mistral-7b_deepseek-reasoner.pdf › Routing_SLM_LLMs/Proxy_routing_prediction/to_deepseek-reasoner/aqua_as_downstream/cali_down_aqua_mistral-7b_deepseek-reasoner.pdf]

**AQuA, phi-3.5-mini to DeepSeek-R1**

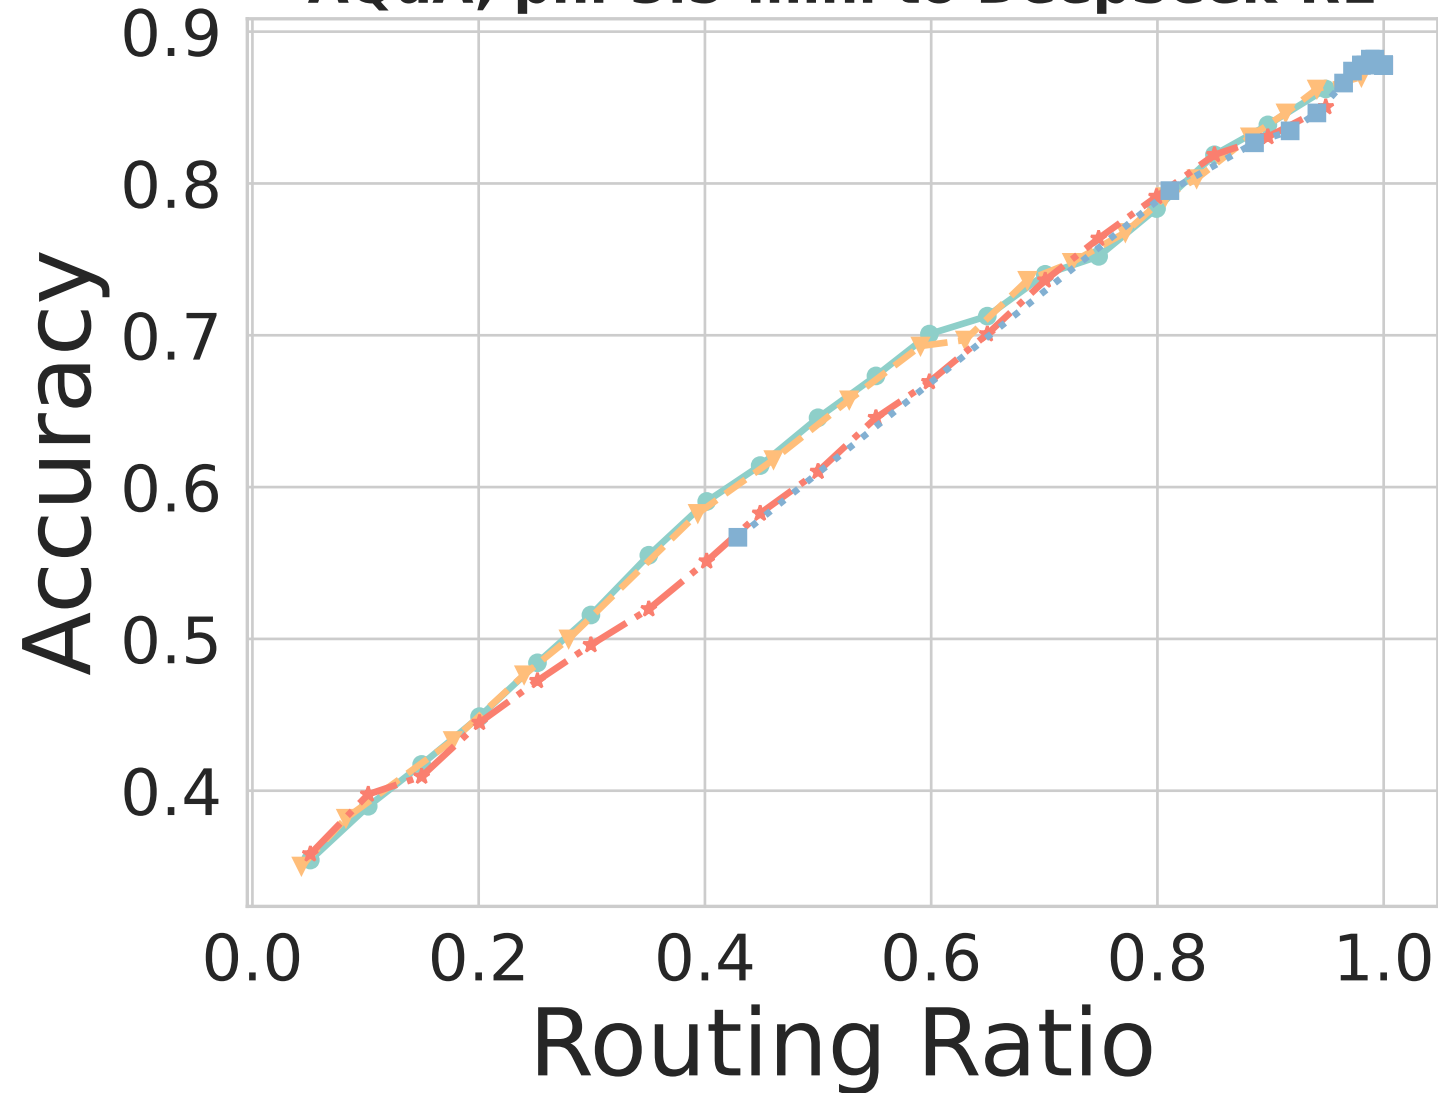

Supplement: supplementary_material [file cali_down_aqua_phi-3.5-mini_deepseek-reasoner.pdf › Routing_SLM_LLMs/Proxy_routing_prediction/to_deepseek-reasoner/aqua_as_downstream/cali_down_aqua_phi-3.5-mini_deepseek-reasoner.pdf]

# AQuA, phi-4-mini-reasoning to DeepSeek-R1

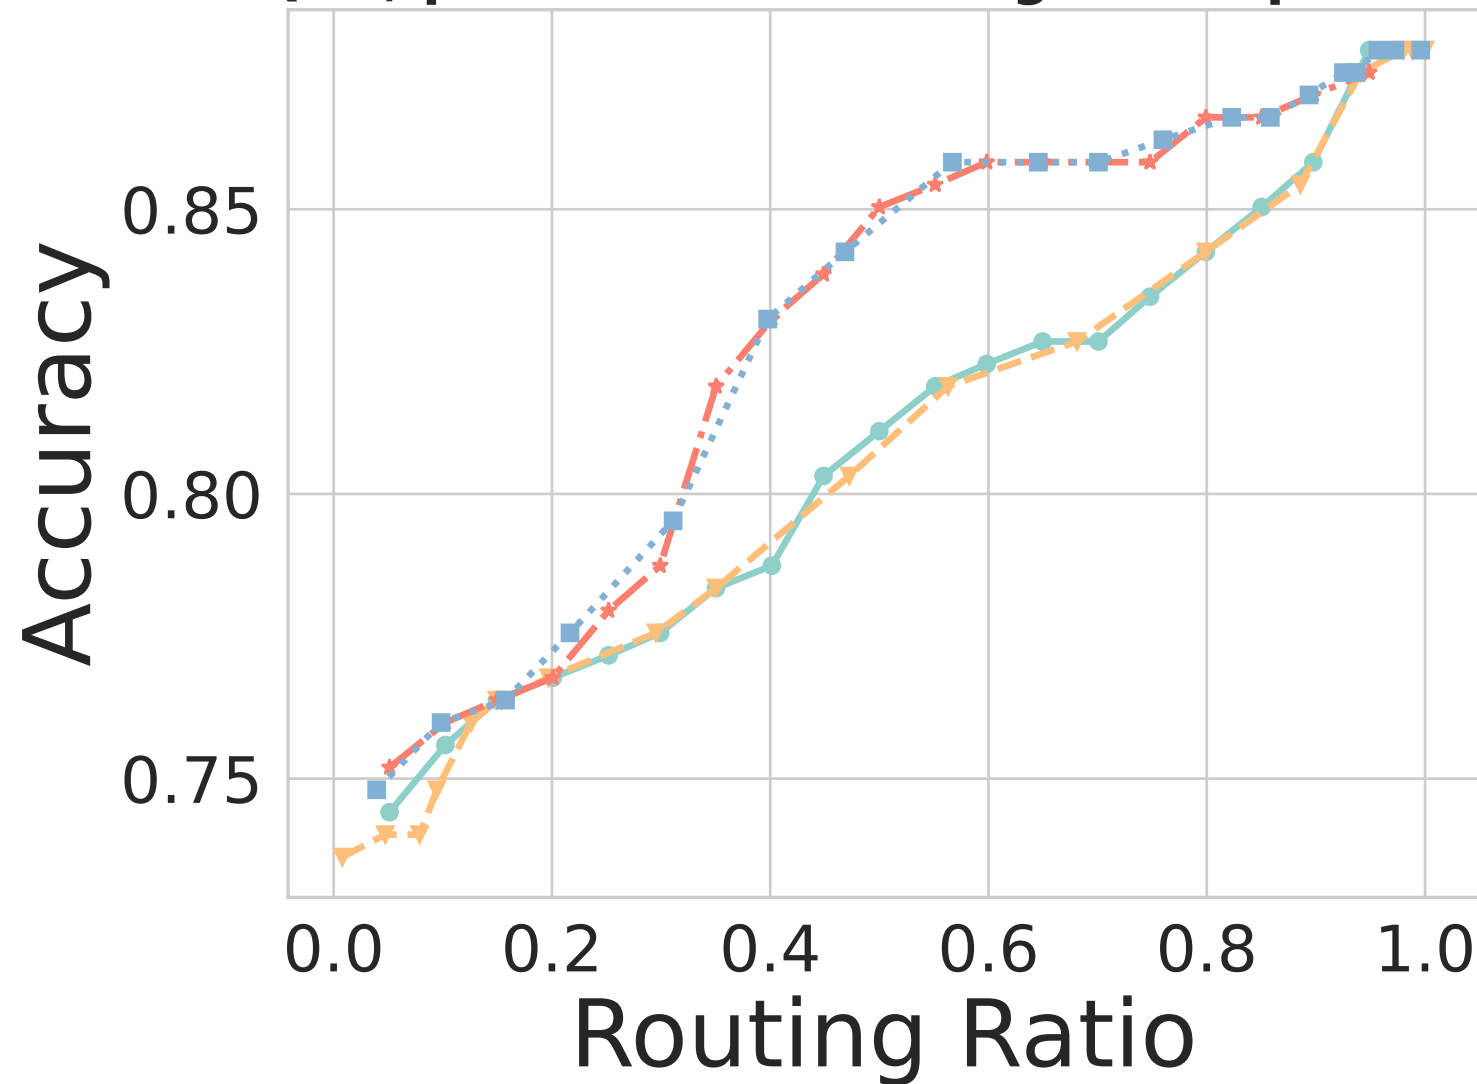

Supplement: supplementary_material [file cali_down_aqua_phi-4-mini-reasoning_deepseek-reasoner.pdf › Routing_SLM_LLMs/Proxy_routing_prediction/to_deepseek-reasoner/aqua_as_downstream/cali_down_aqua_phi-4-mini-reasoning_deepseek-reasoner.pdf]

**AQuA, qwen-2.5-7b to DeepSeek-R1**

Accuracy

0.9

0.8

0.7

0.6

0.5

0.2

0.4

0.6

0.8

1.0

Routing Ratio

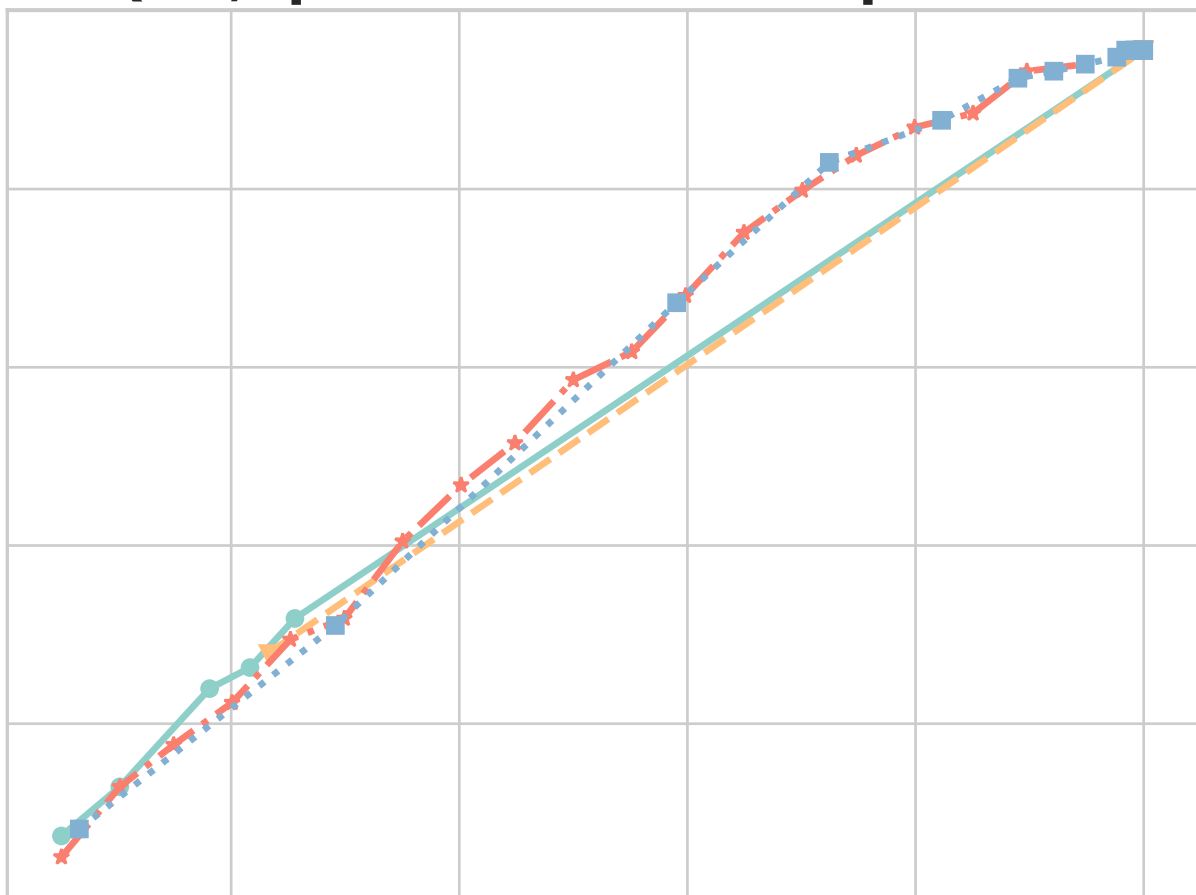

Supplement: supplementary_material [file cali_down_aqua_qwen-2.5-7b_deepseek-reasoner.pdf › Routing_SLM_LLMs/Proxy_routing_prediction/to_deepseek-reasoner/aqua_as_downstream/cali_down_aqua_qwen-2.5-7b_deepseek-reasoner.pdf]

**AQuA, rwkv to DeepSeek-R1**

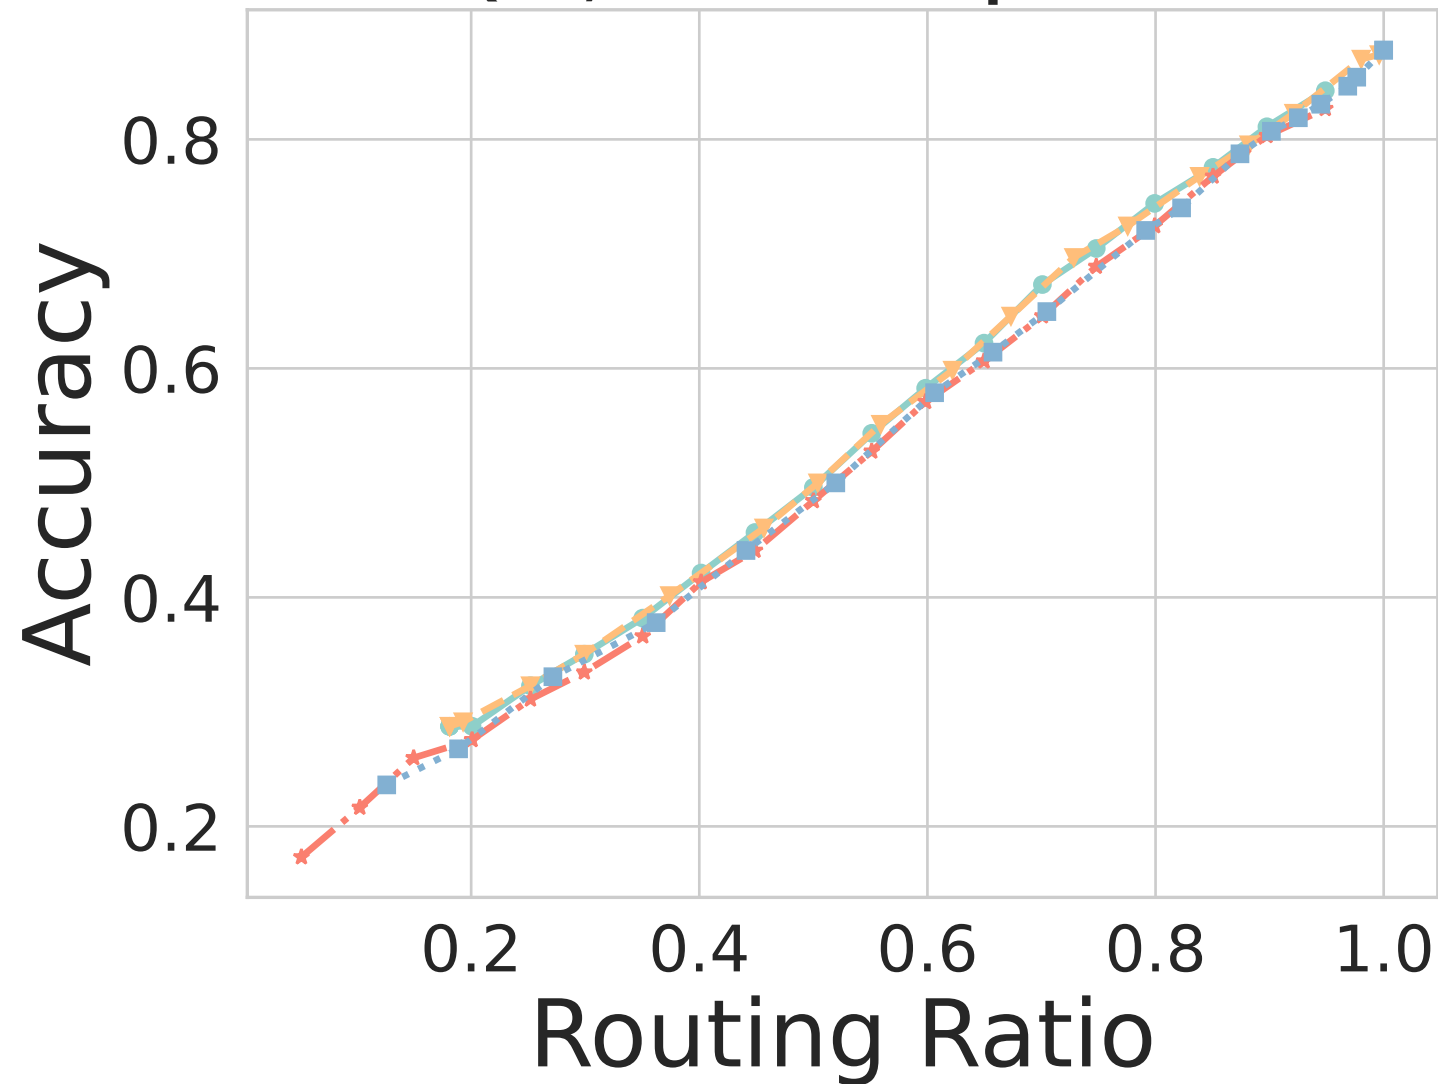

Supplement: supplementary_material [file cali_down_aqua_rwkv_deepseek-reasoner.pdf › Routing_SLM_LLMs/Proxy_routing_prediction/to_deepseek-reasoner/aqua_as_downstream/cali_down_aqua_rwkv_deepseek-reasoner.pdf]

**BoolQ, Qwen3-0.6B to DeepSeek-R1**

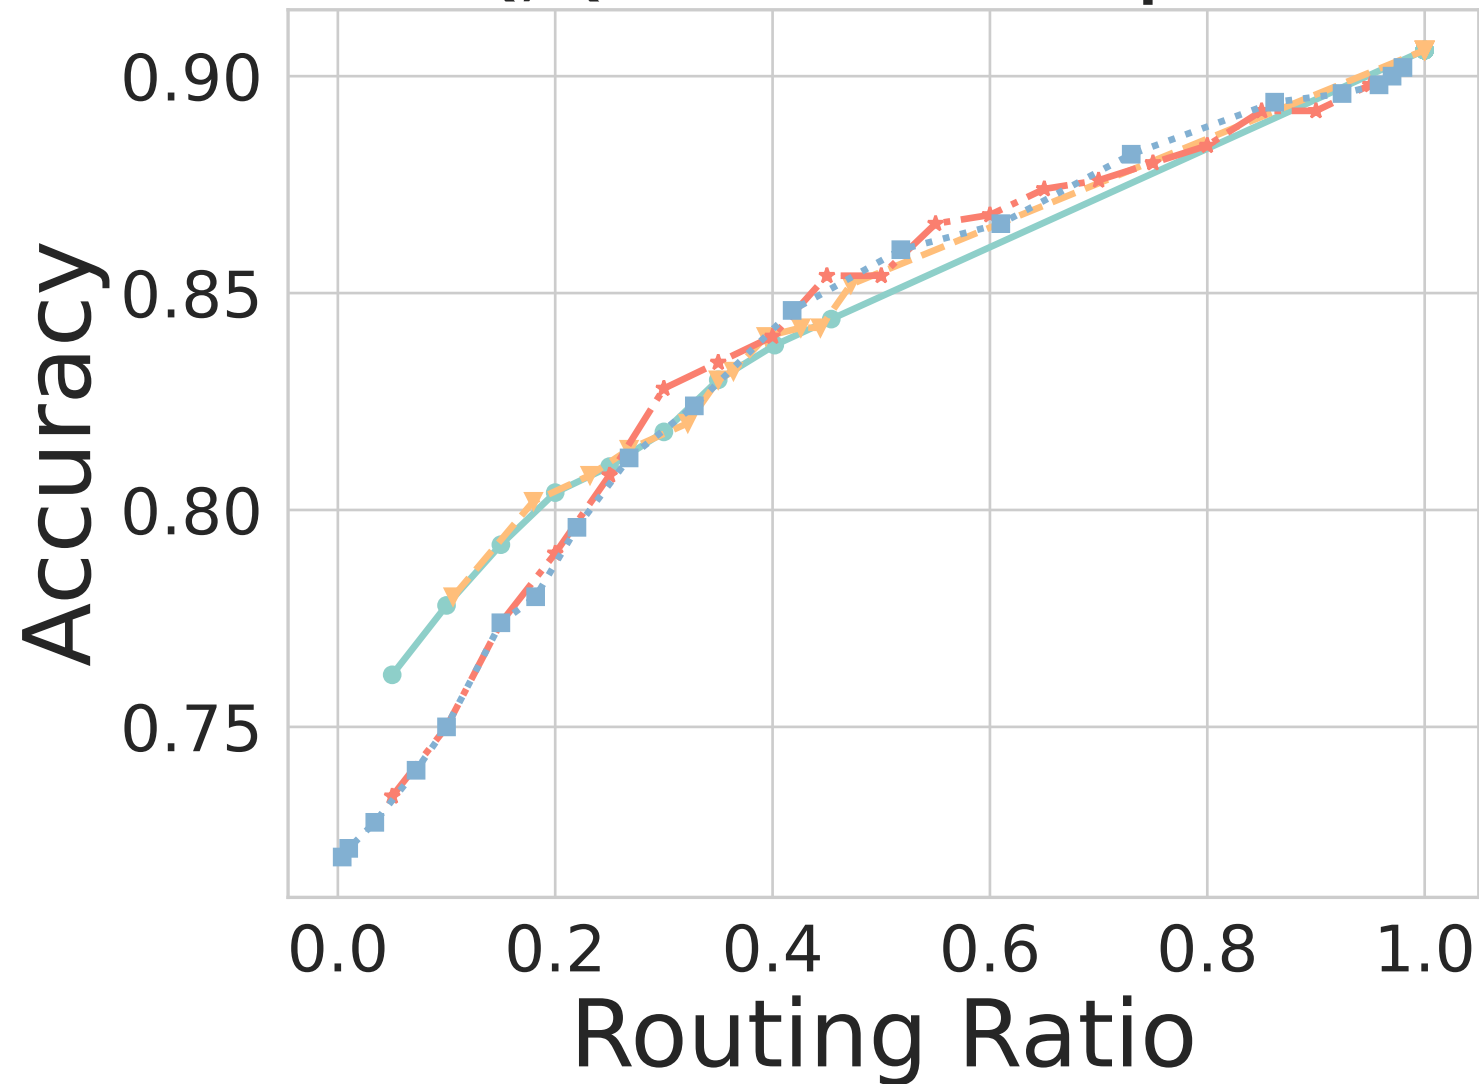

Supplement: supplementary_material [file cali_down_boolq_Qwen3-0.6B_deepseek-reasoner.pdf › Routing_SLM_LLMs/Proxy_routing_prediction/to_deepseek-reasoner/boolq_as_downstream/cali_down_boolq_Qwen3-0.6B_deepseek-reasoner.pdf]

**BoolQ, Qwen3-1.7B to DeepSeek-R1**

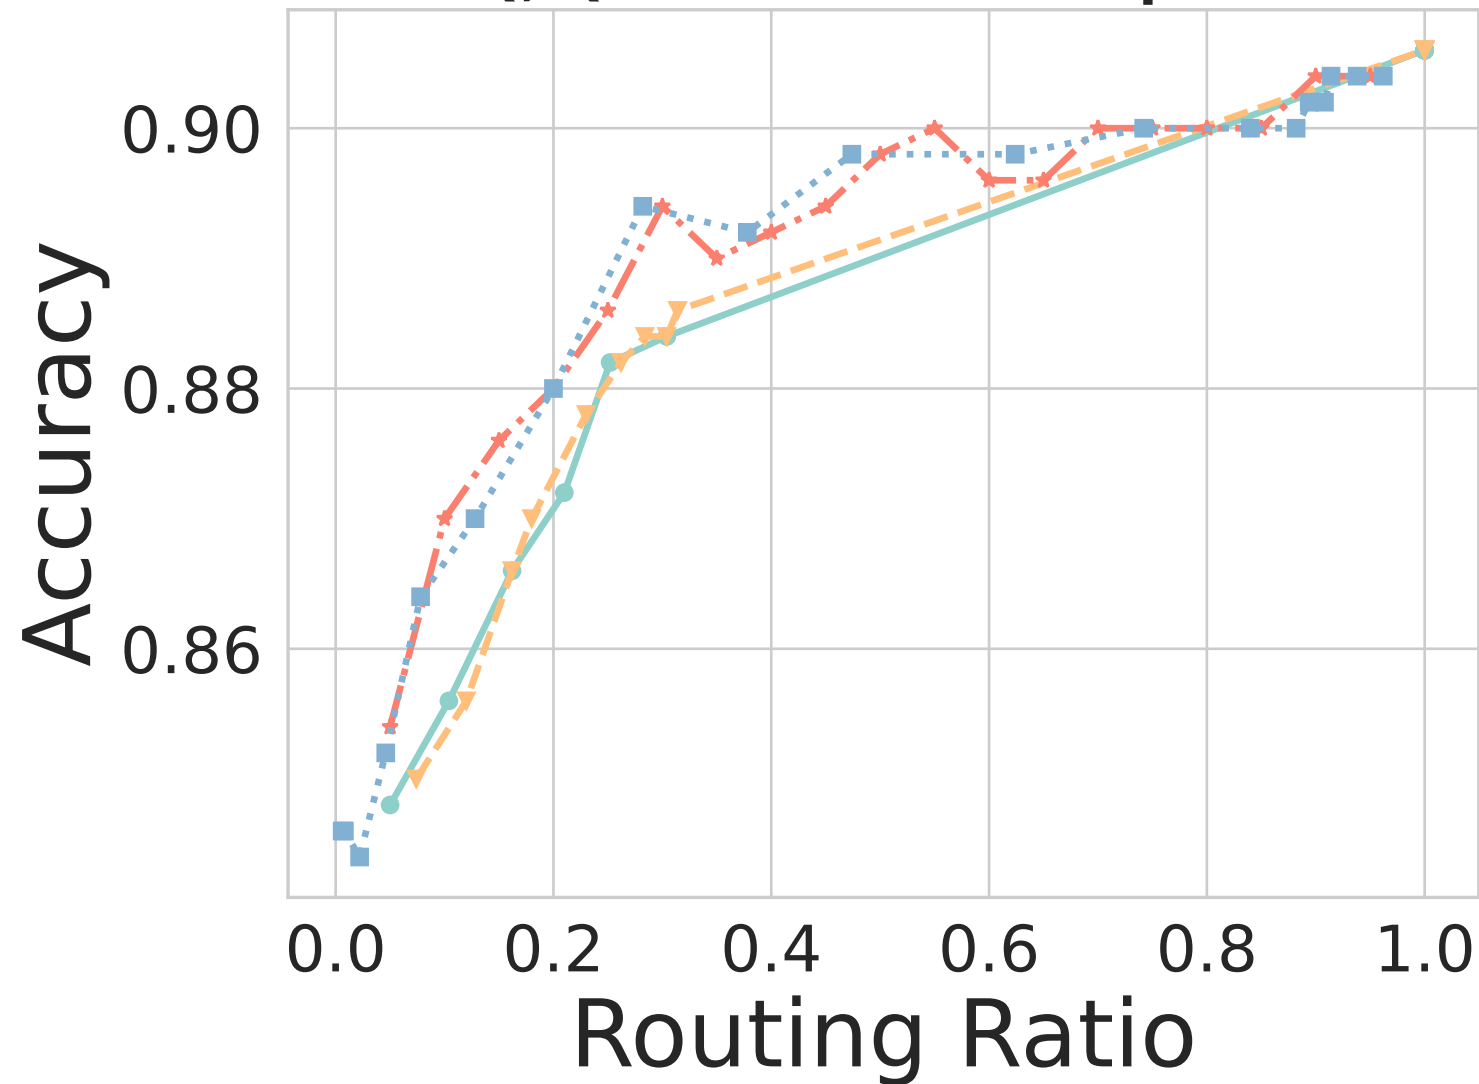

Supplement: supplementary_material [file cali_down_boolq_Qwen3-1.7B_deepseek-reasoner.pdf › Routing_SLM_LLMs/Proxy_routing_prediction/to_deepseek-reasoner/boolq_as_downstream/cali_down_boolq_Qwen3-1.7B_deepseek-reasoner.pdf]

**BoolQ, Qwen3-4B to DeepSeek-R1**

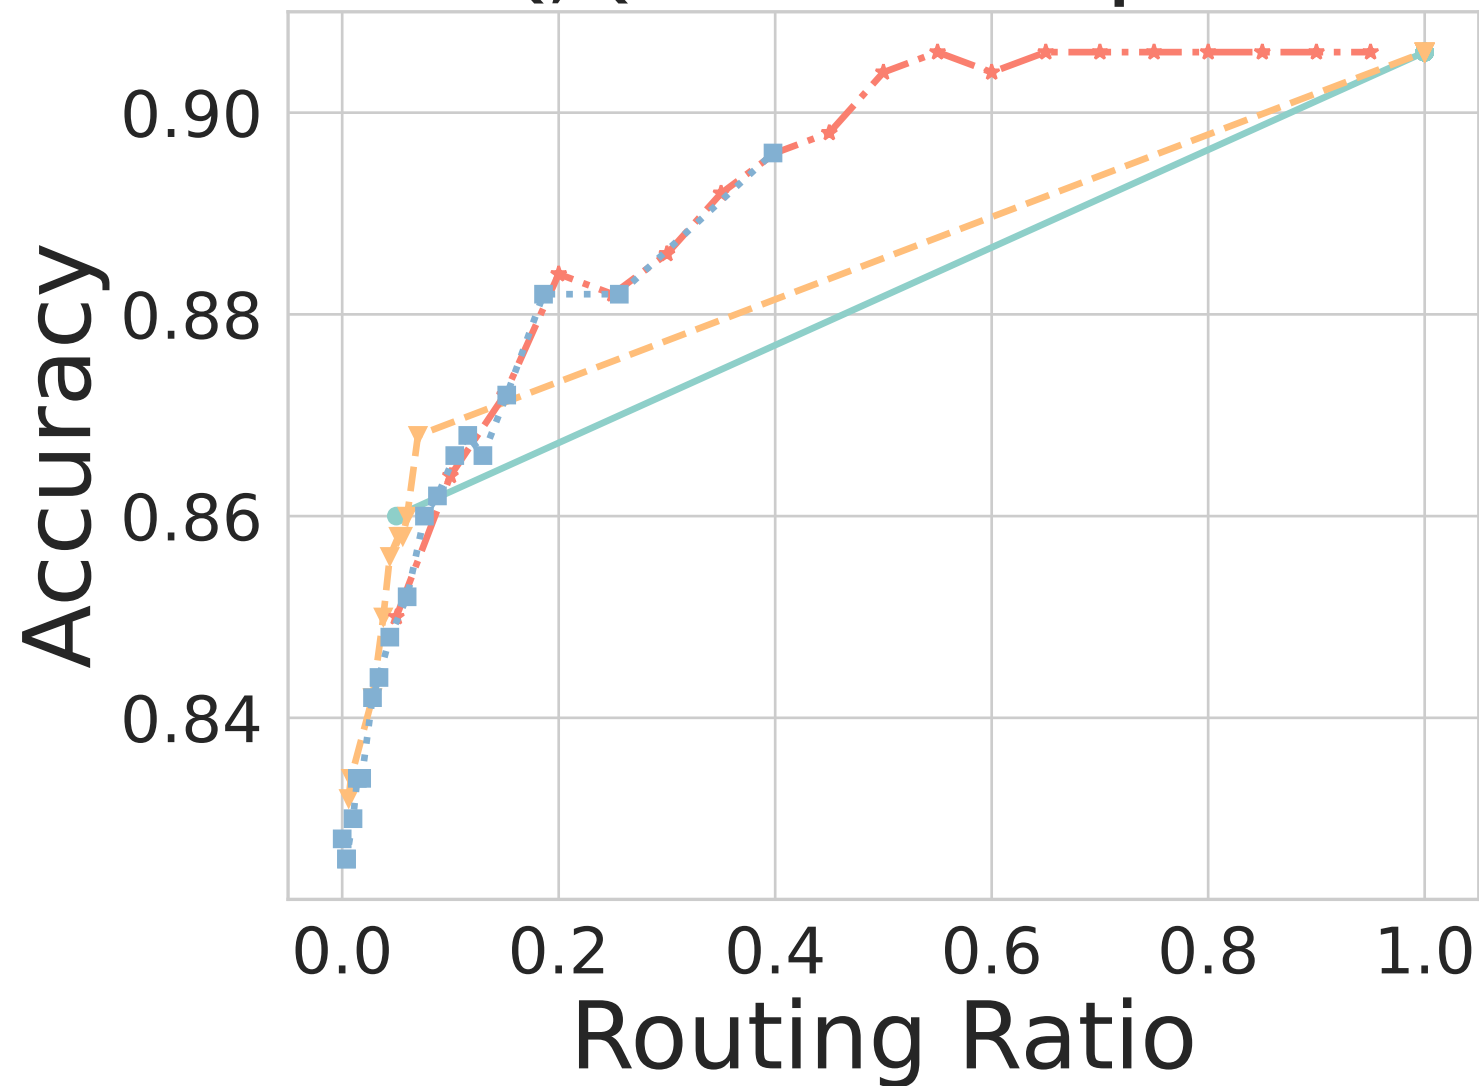

Supplement: supplementary_material [file cali_down_boolq_Qwen3-4B_deepseek-reasoner.pdf › Routing_SLM_LLMs/Proxy_routing_prediction/to_deepseek-reasoner/boolq_as_downstream/cali_down_boolq_Qwen3-4B_deepseek-reasoner.pdf]

**BoolQ, granite-3.1-8b to DeepSeek-R1**

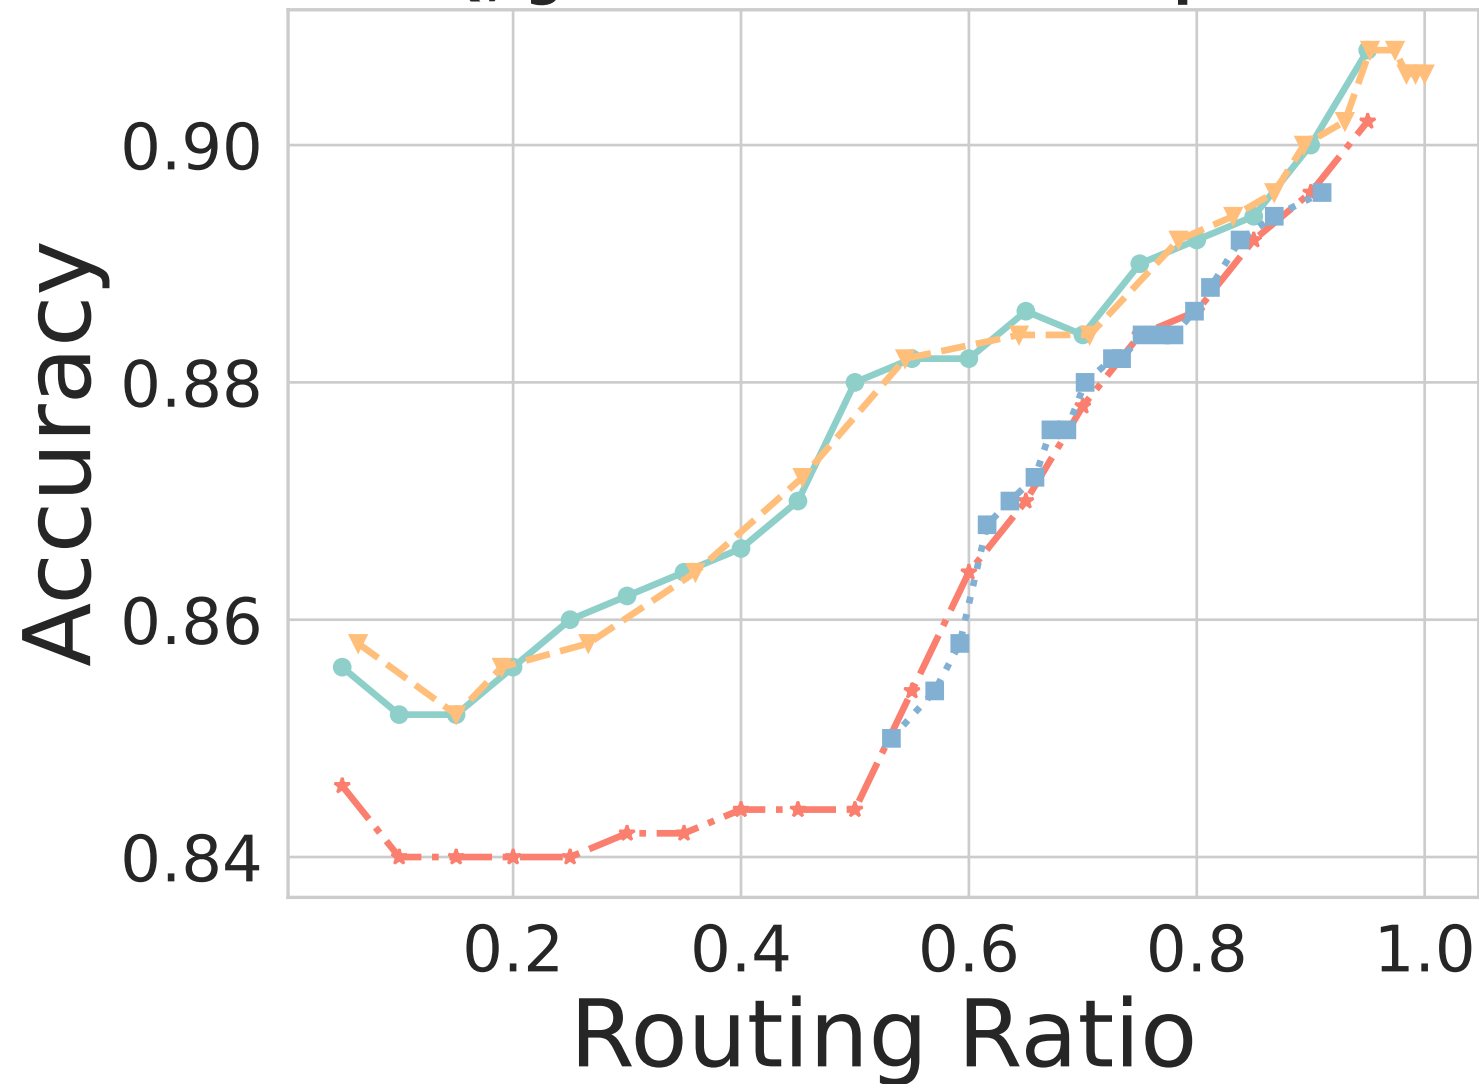

Supplement: supplementary_material [file cali_down_boolq_granite-3.1-8b_deepseek-reasoner.pdf › Routing_SLM_LLMs/Proxy_routing_prediction/to_deepseek-reasoner/boolq_as_downstream/cali_down_boolq_granite-3.1-8b_deepseek-reasoner.pdf]

**BoolQ, llama-3.1-8b to DeepSeek-R1**

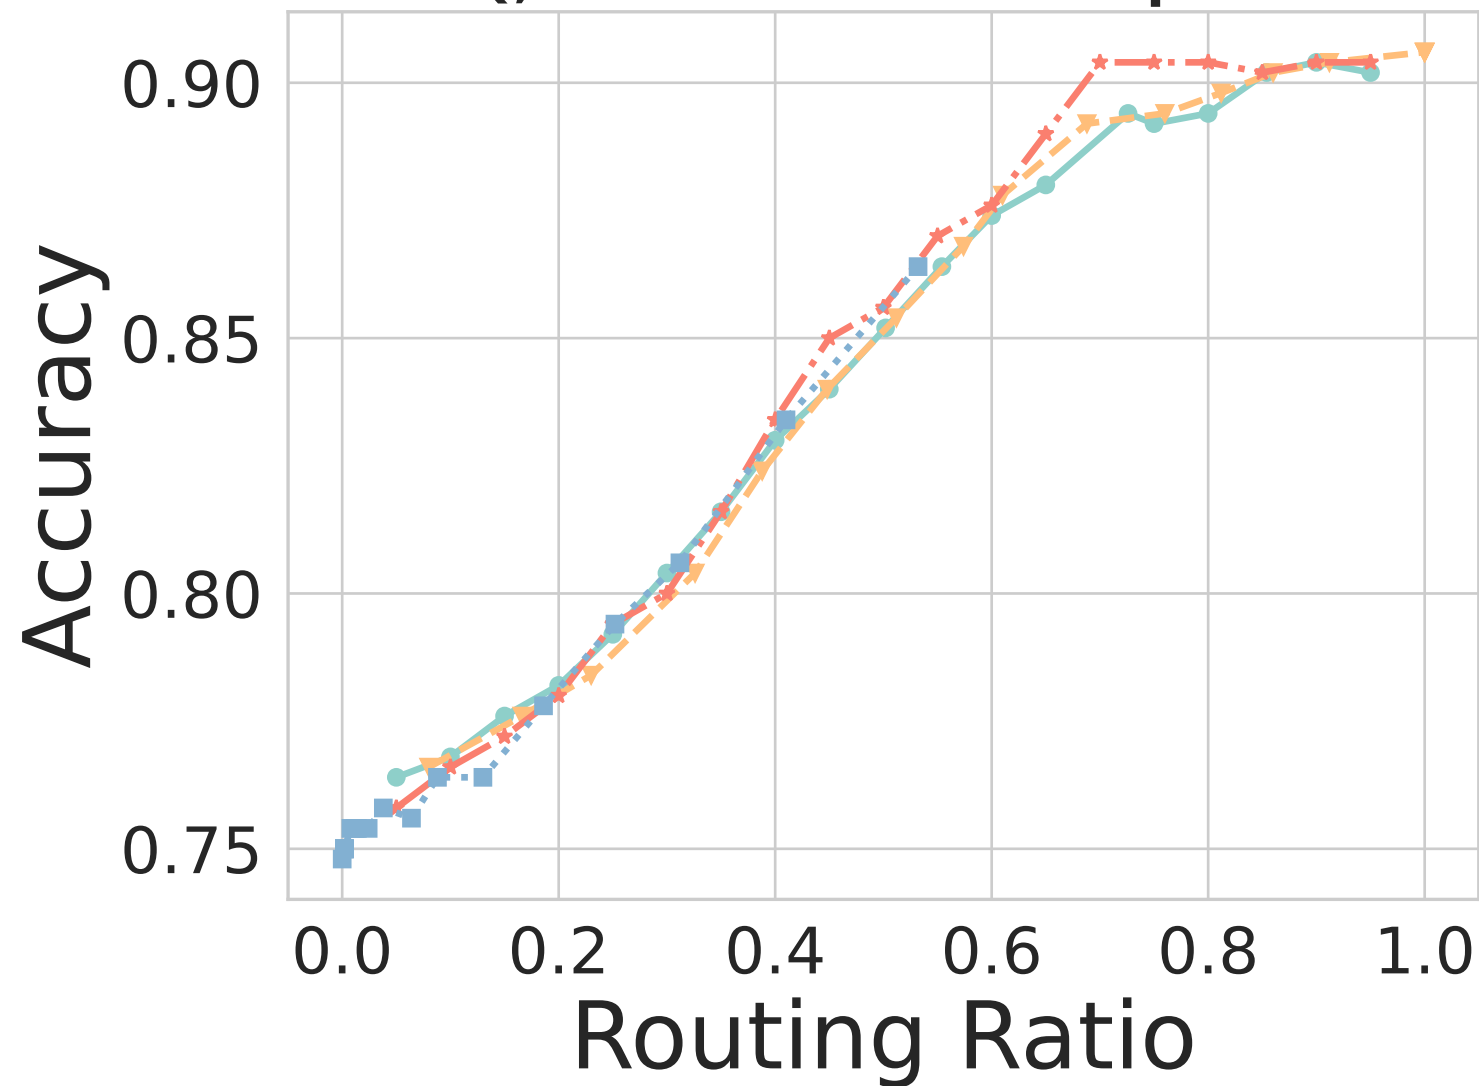

Supplement: supplementary_material [file cali_down_boolq_llama-3.1-8b_deepseek-reasoner.pdf › Routing_SLM_LLMs/Proxy_routing_prediction/to_deepseek-reasoner/boolq_as_downstream/cali_down_boolq_llama-3.1-8b_deepseek-reasoner.pdf]

**BoolQ, llama-3.2-1b to DeepSeek-R1**

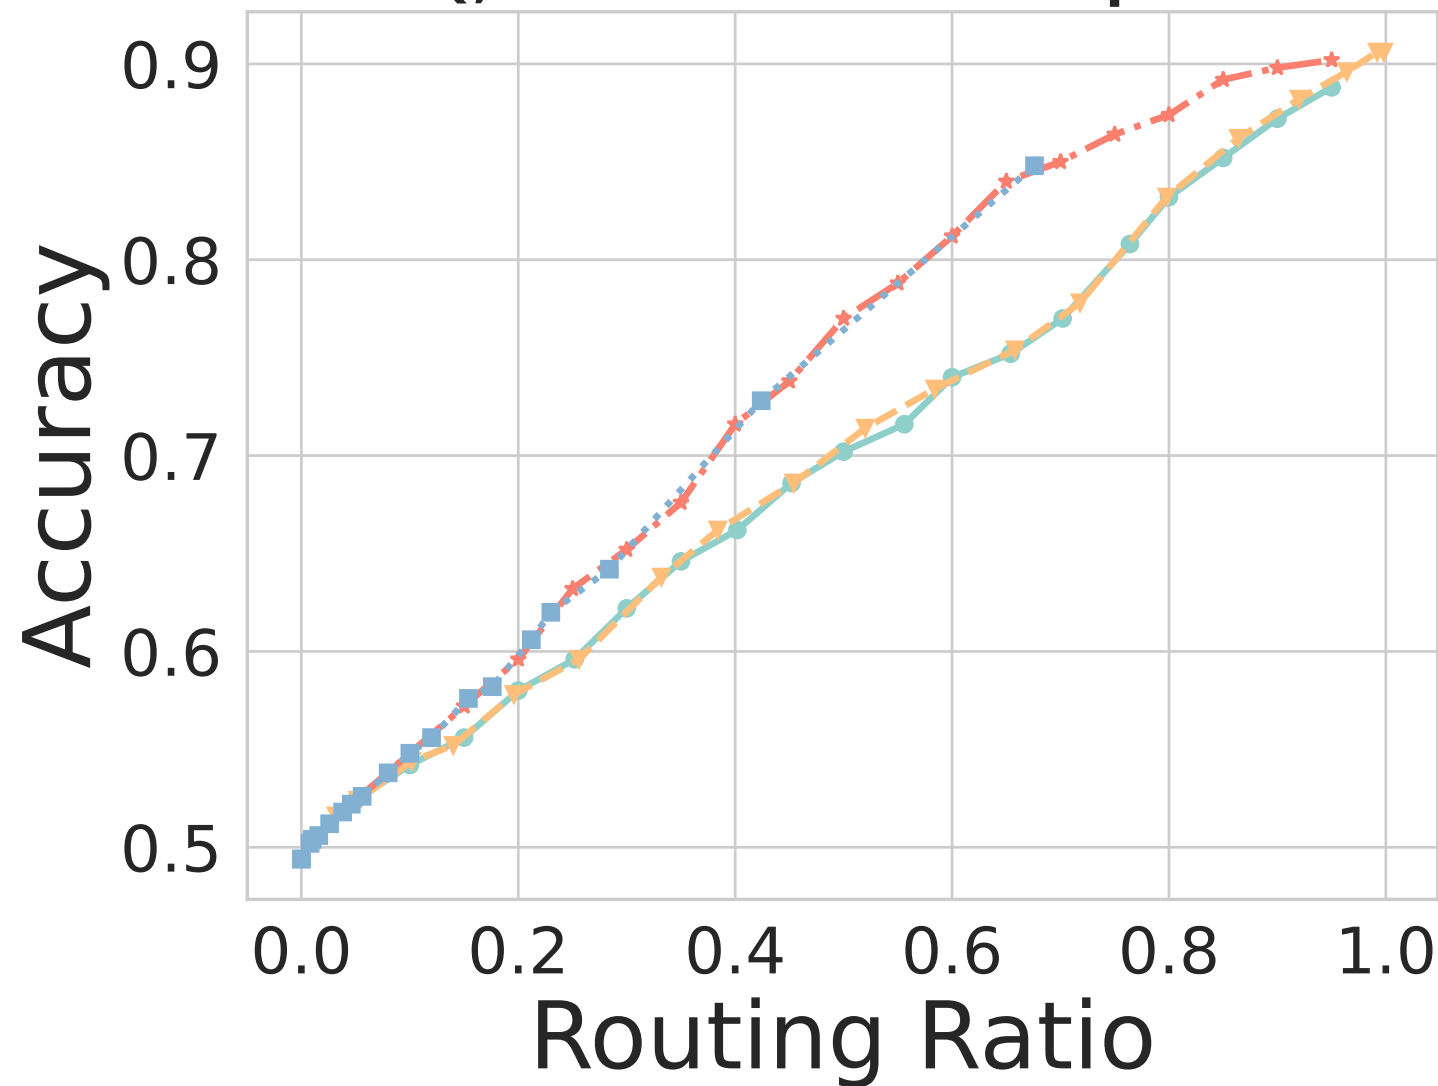

Supplement: supplementary_material [file cali_down_boolq_llama-3.2-1b_deepseek-reasoner.pdf › Routing_SLM_LLMs/Proxy_routing_prediction/to_deepseek-reasoner/boolq_as_downstream/cali_down_boolq_llama-3.2-1b_deepseek-reasoner.pdf]

**BoolQ, llama-3.2-3b to DeepSeek-R1**

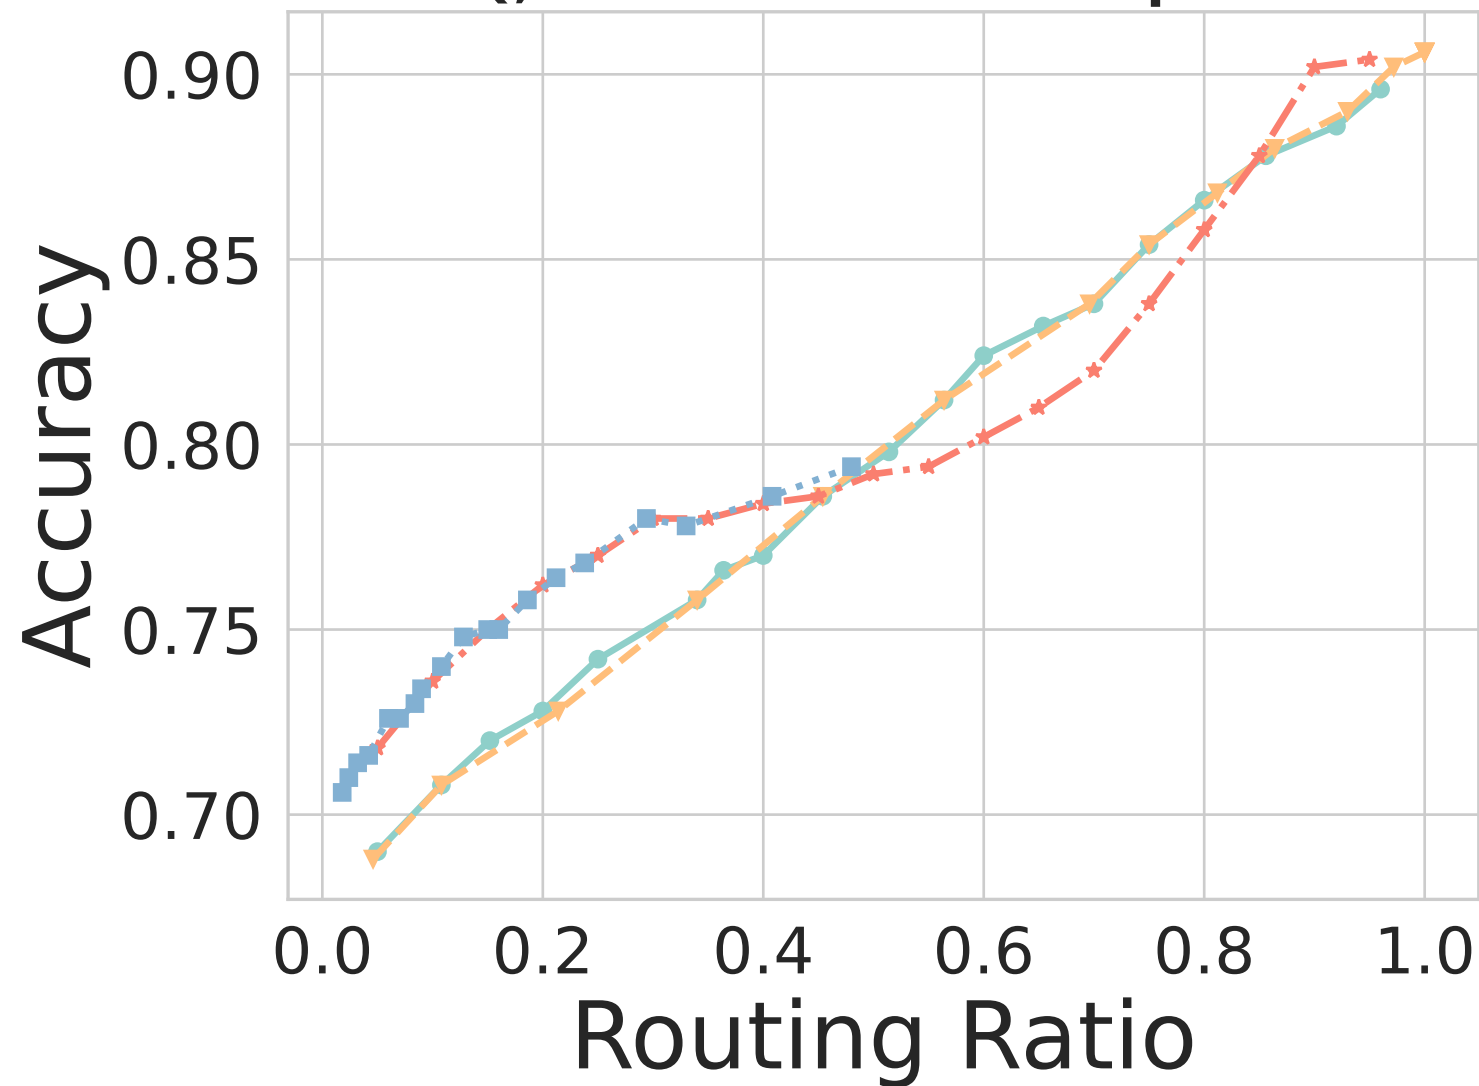

Supplement: supplementary_material [file cali_down_boolq_llama-3.2-3b_deepseek-reasoner.pdf › Routing_SLM_LLMs/Proxy_routing_prediction/to_deepseek-reasoner/boolq_as_downstream/cali_down_boolq_llama-3.2-3b_deepseek-reasoner.pdf]

**BoolQ, mistral-7b to DeepSeek-R1**

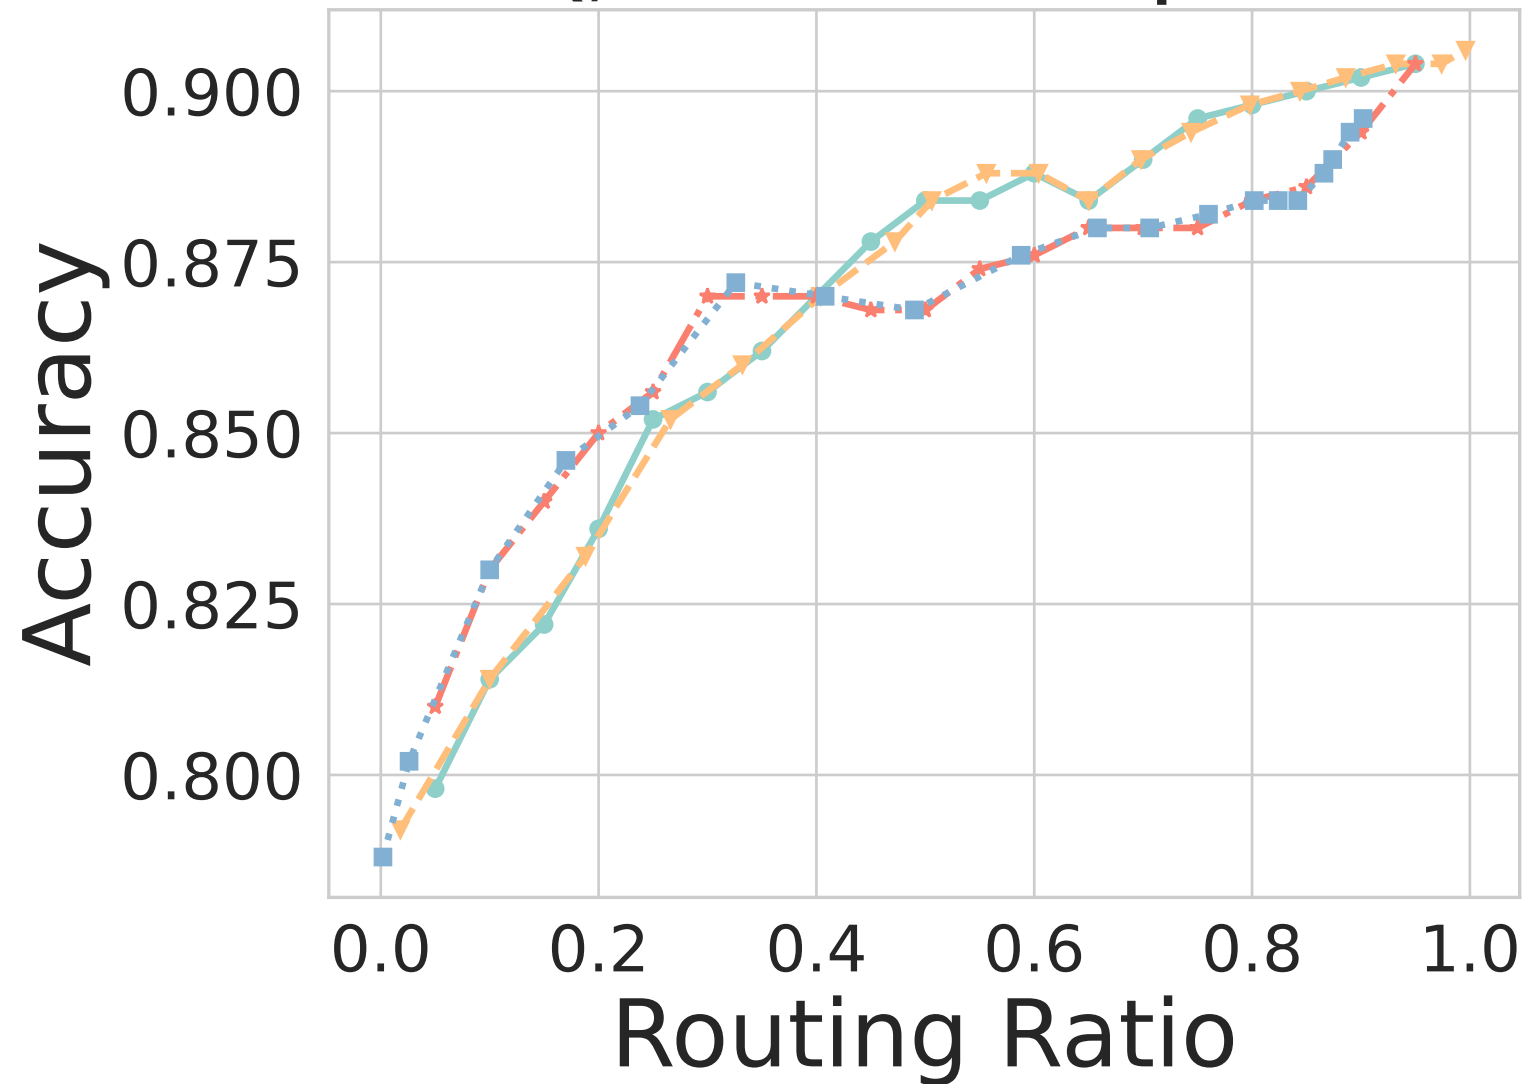

Supplement: supplementary_material [file cali_down_boolq_mistral-7b_deepseek-reasoner.pdf › Routing_SLM_LLMs/Proxy_routing_prediction/to_deepseek-reasoner/boolq_as_downstream/cali_down_boolq_mistral-7b_deepseek-reasoner.pdf]
