# Supplementary material (part 4 of 14)
Source: ML conference proceedings conference paper supplement (https://openreview.net/forum?id=smdbra3VEi)

**PIQA, Qwen3-0.6B to DeepSeek-R1**

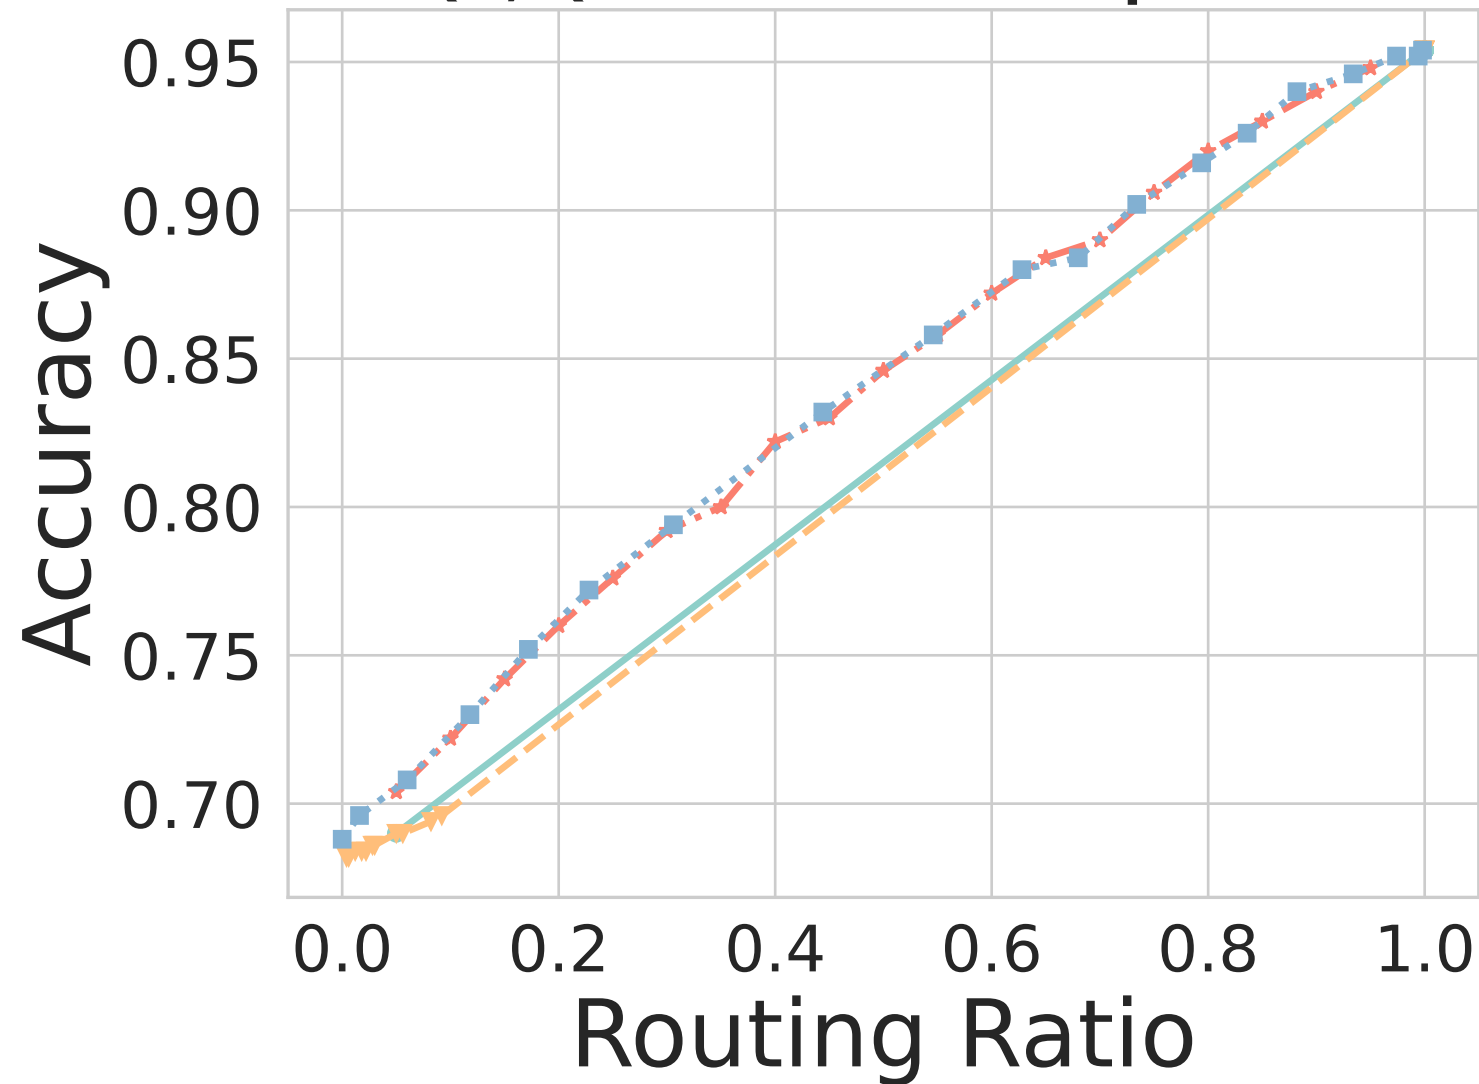

Supplement: supplementary_material [file cali_down_pi_qa_Qwen3-0.6B_deepseek-reasoner.pdf › Routing_SLM_LLMs/Proxy_routing_prediction/to_deepseek-reasoner/pi_qa_as_downstream/cali_down_pi_qa_Qwen3-0.6B_deepseek-reasoner.pdf]

**PIQA, Qwen3-1.7B to DeepSeek-R1**

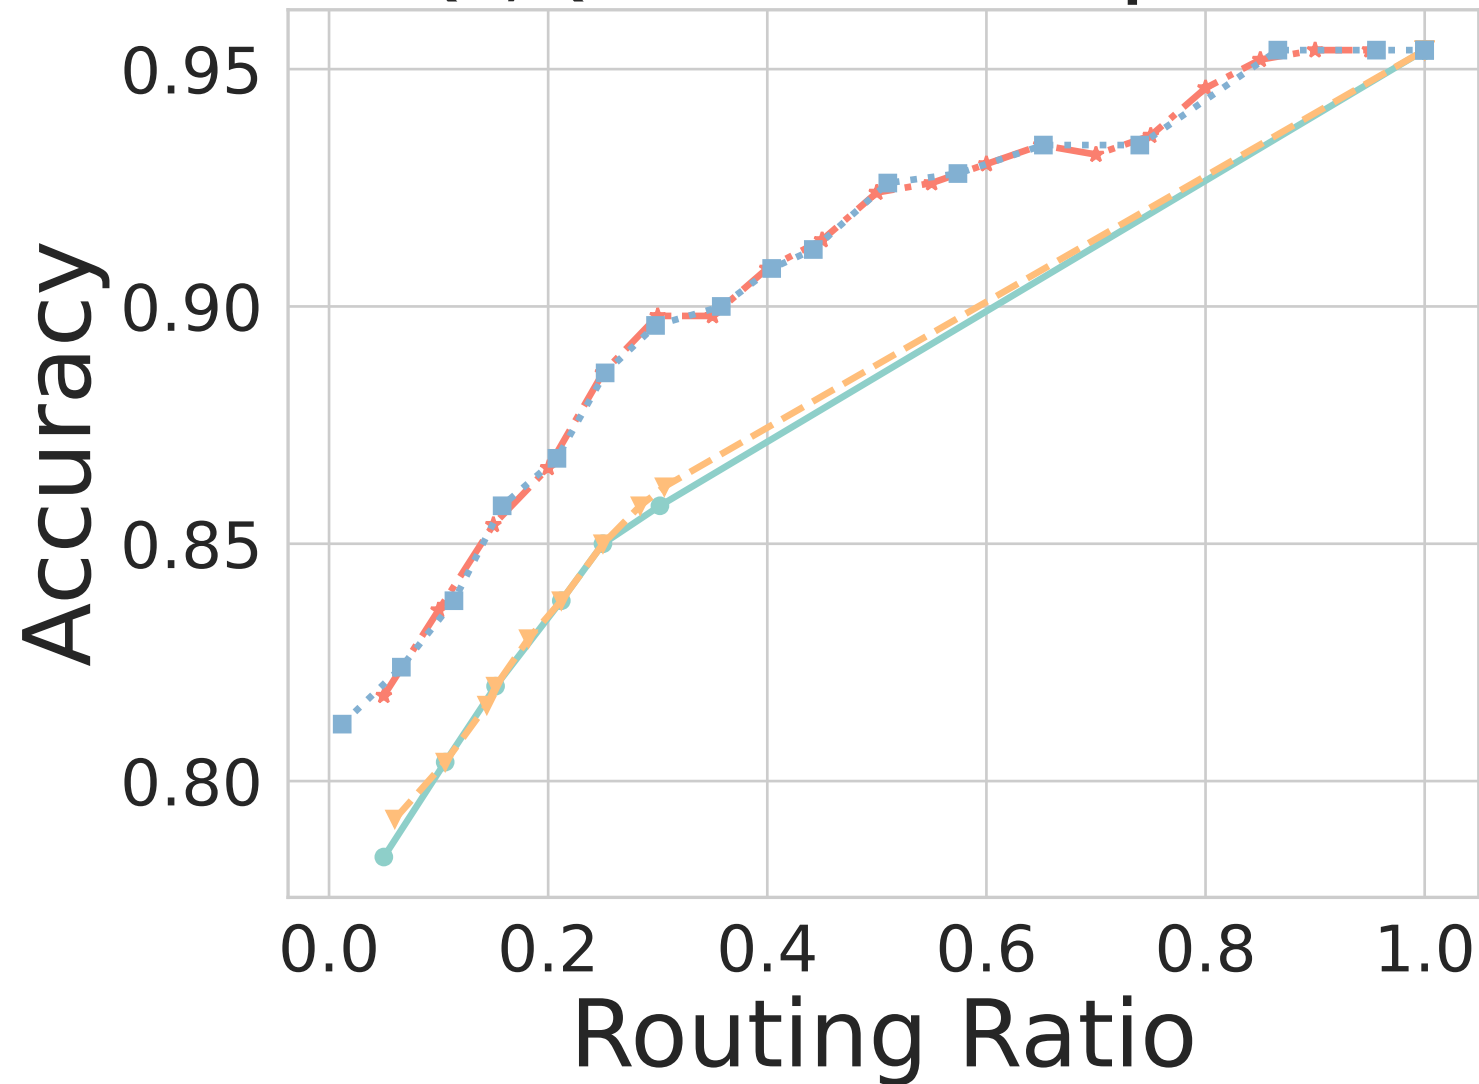

Supplement: supplementary_material [file cali_down_pi_qa_Qwen3-1.7B_deepseek-reasoner.pdf › Routing_SLM_LLMs/Proxy_routing_prediction/to_deepseek-reasoner/pi_qa_as_downstream/cali_down_pi_qa_Qwen3-1.7B_deepseek-reasoner.pdf]

**PIQA, Qwen3-4B to DeepSeek-R1**

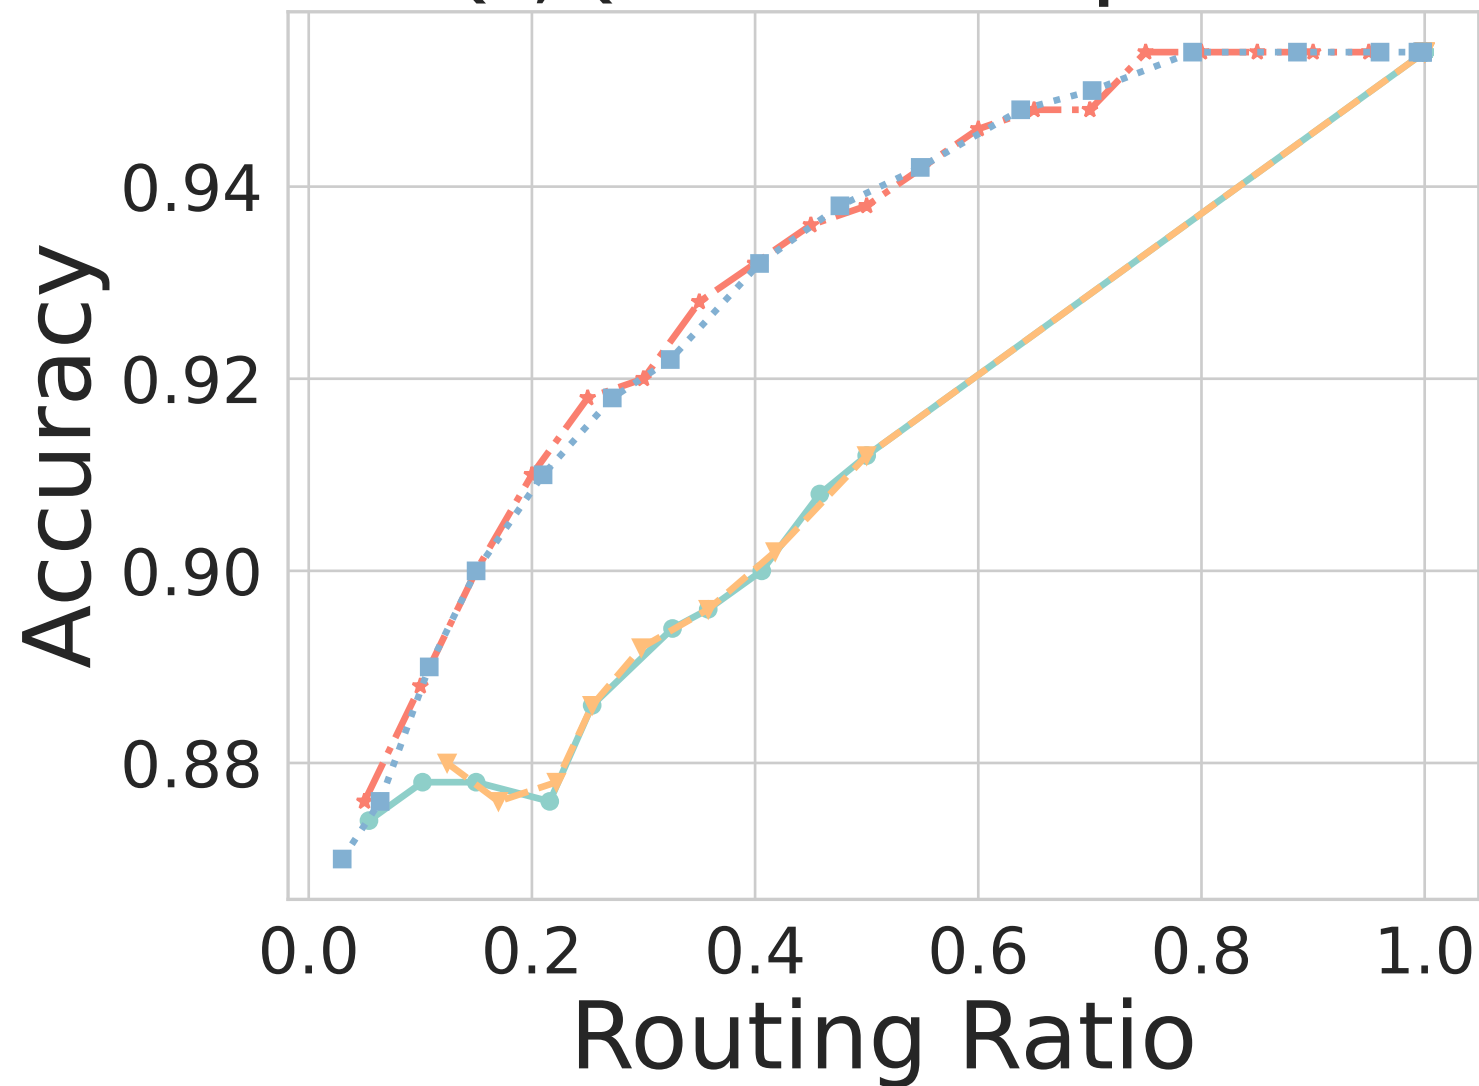

Supplement: supplementary_material [file cali_down_pi_qa_Qwen3-4B_deepseek-reasoner.pdf › Routing_SLM_LLMs/Proxy_routing_prediction/to_deepseek-reasoner/pi_qa_as_downstream/cali_down_pi_qa_Qwen3-4B_deepseek-reasoner.pdf]

**PIQA, granite-3.1-8b to DeepSeek-R1**

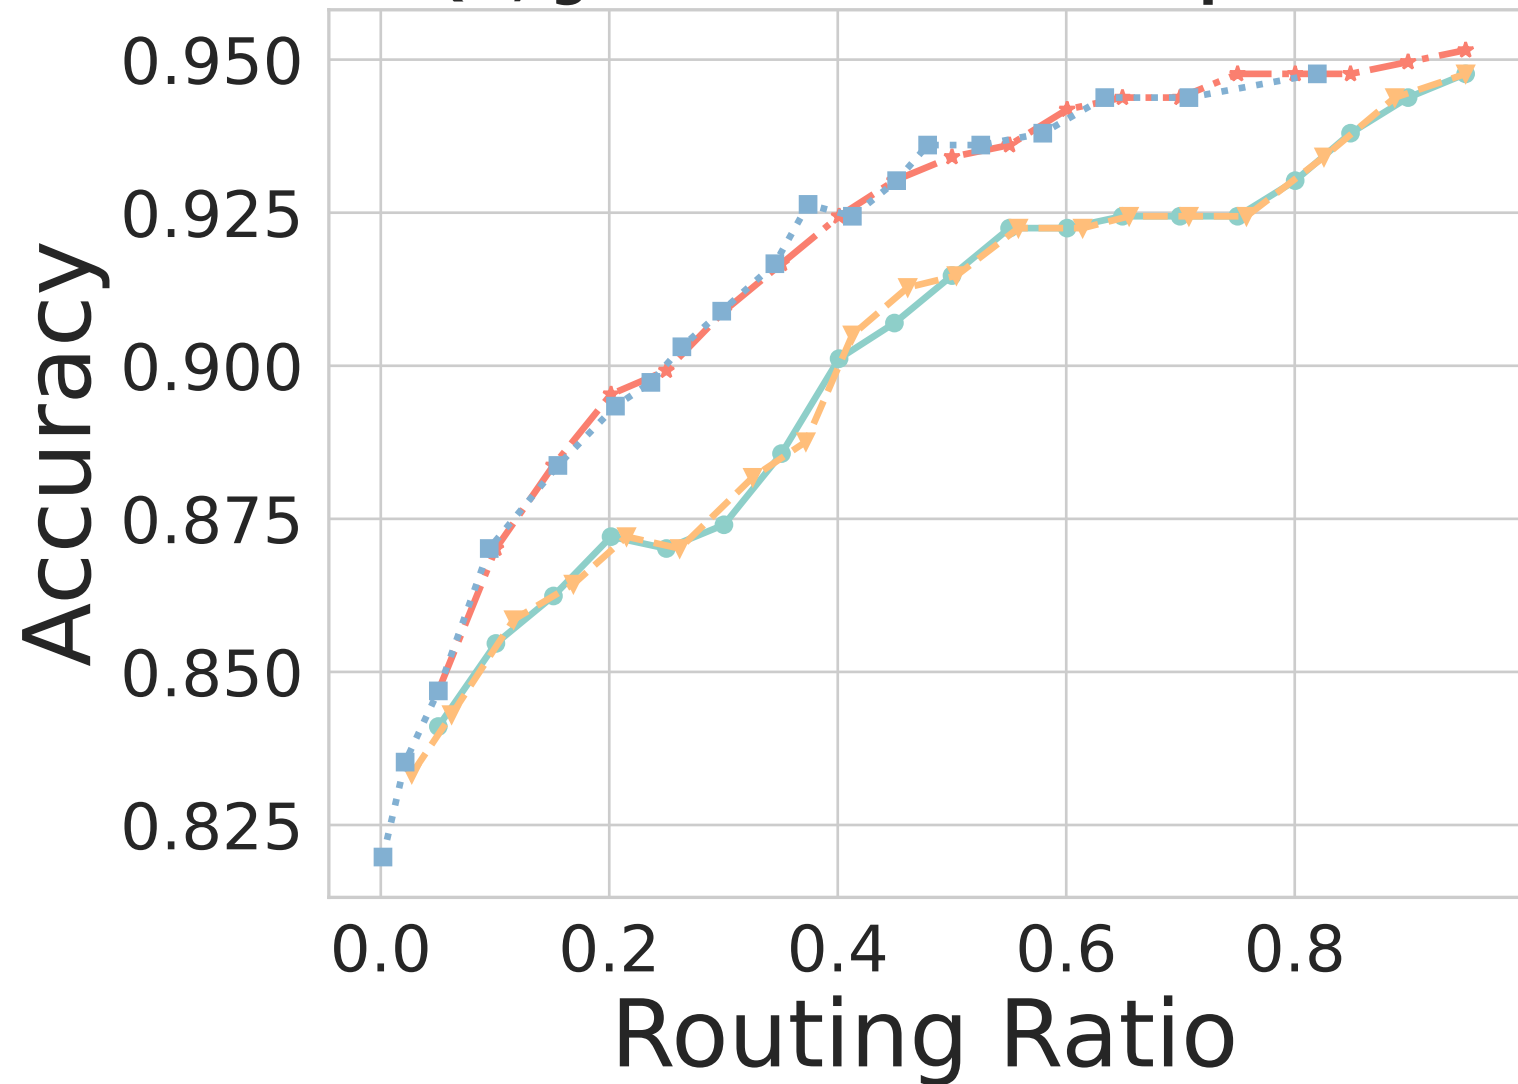

Supplement: supplementary_material [file cali_down_pi_qa_granite-3.1-8b_deepseek-reasoner.pdf › Routing_SLM_LLMs/Proxy_routing_prediction/to_deepseek-reasoner/pi_qa_as_downstream/cali_down_pi_qa_granite-3.1-8b_deepseek-reasoner.pdf]

**PIQA, llama-3.1-8b to DeepSeek-R1**

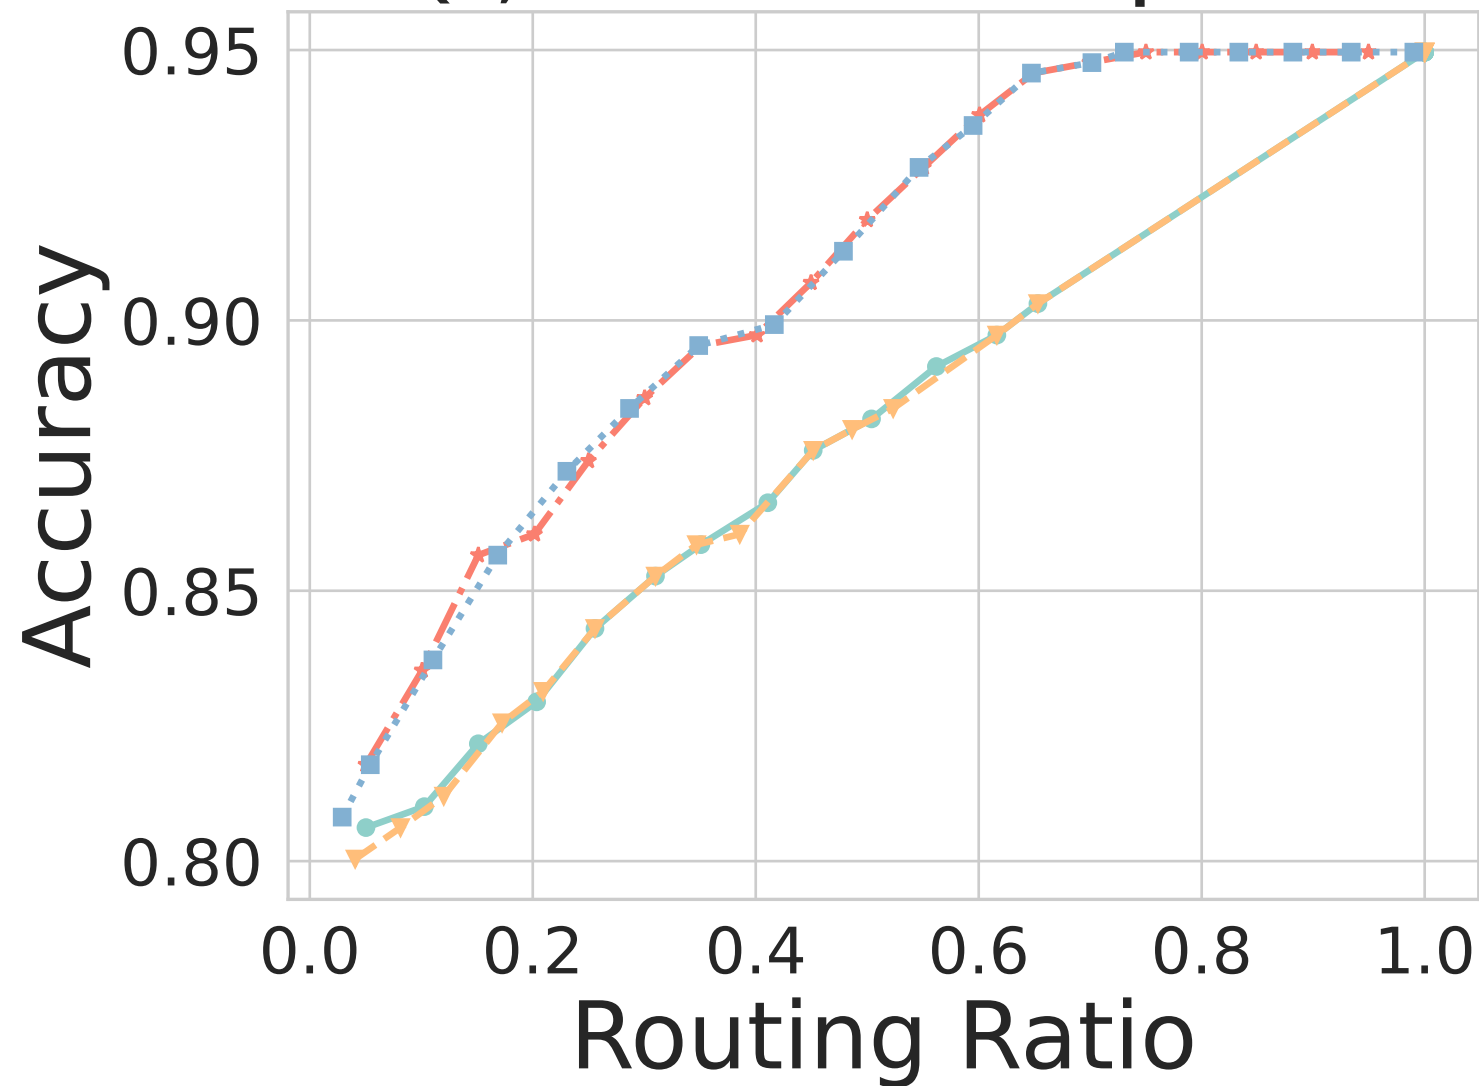

Supplement: supplementary_material [file cali_down_pi_qa_llama-3.1-8b_deepseek-reasoner.pdf › Routing_SLM_LLMs/Proxy_routing_prediction/to_deepseek-reasoner/pi_qa_as_downstream/cali_down_pi_qa_llama-3.1-8b_deepseek-reasoner.pdf]

**PIQA, llama-3.2-1b to DeepSeek-R1**

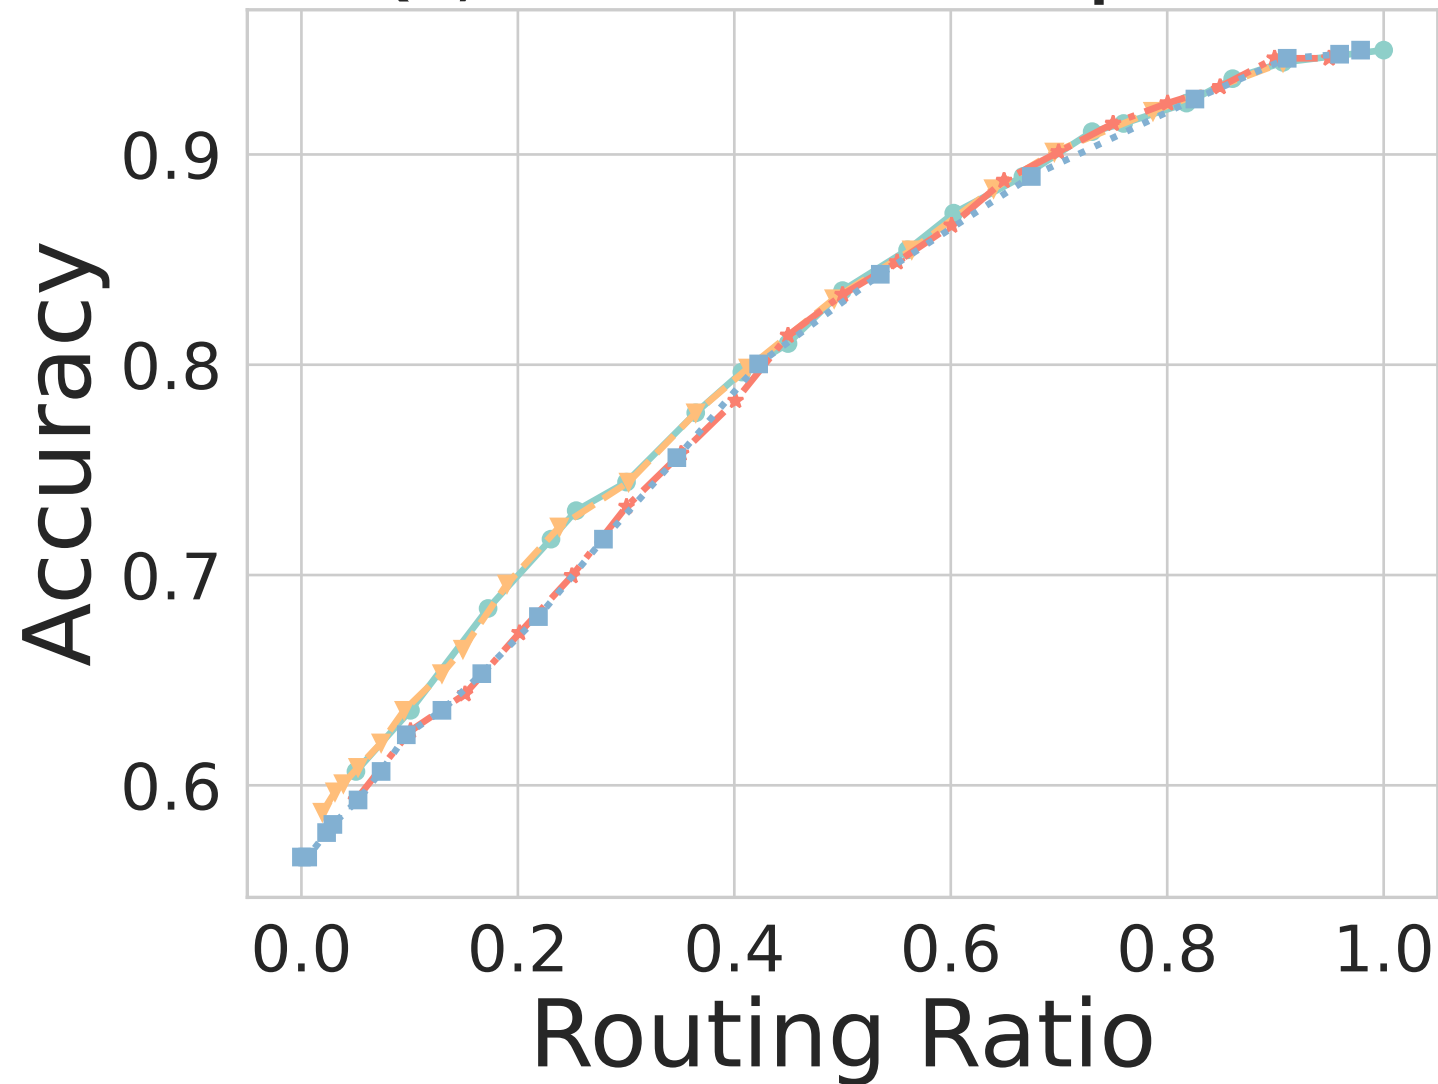

Supplement: supplementary_material [file cali_down_pi_qa_llama-3.2-1b_deepseek-reasoner.pdf › Routing_SLM_LLMs/Proxy_routing_prediction/to_deepseek-reasoner/pi_qa_as_downstream/cali_down_pi_qa_llama-3.2-1b_deepseek-reasoner.pdf]

**PIQA, llama-3.2-3b to DeepSeek-R1**

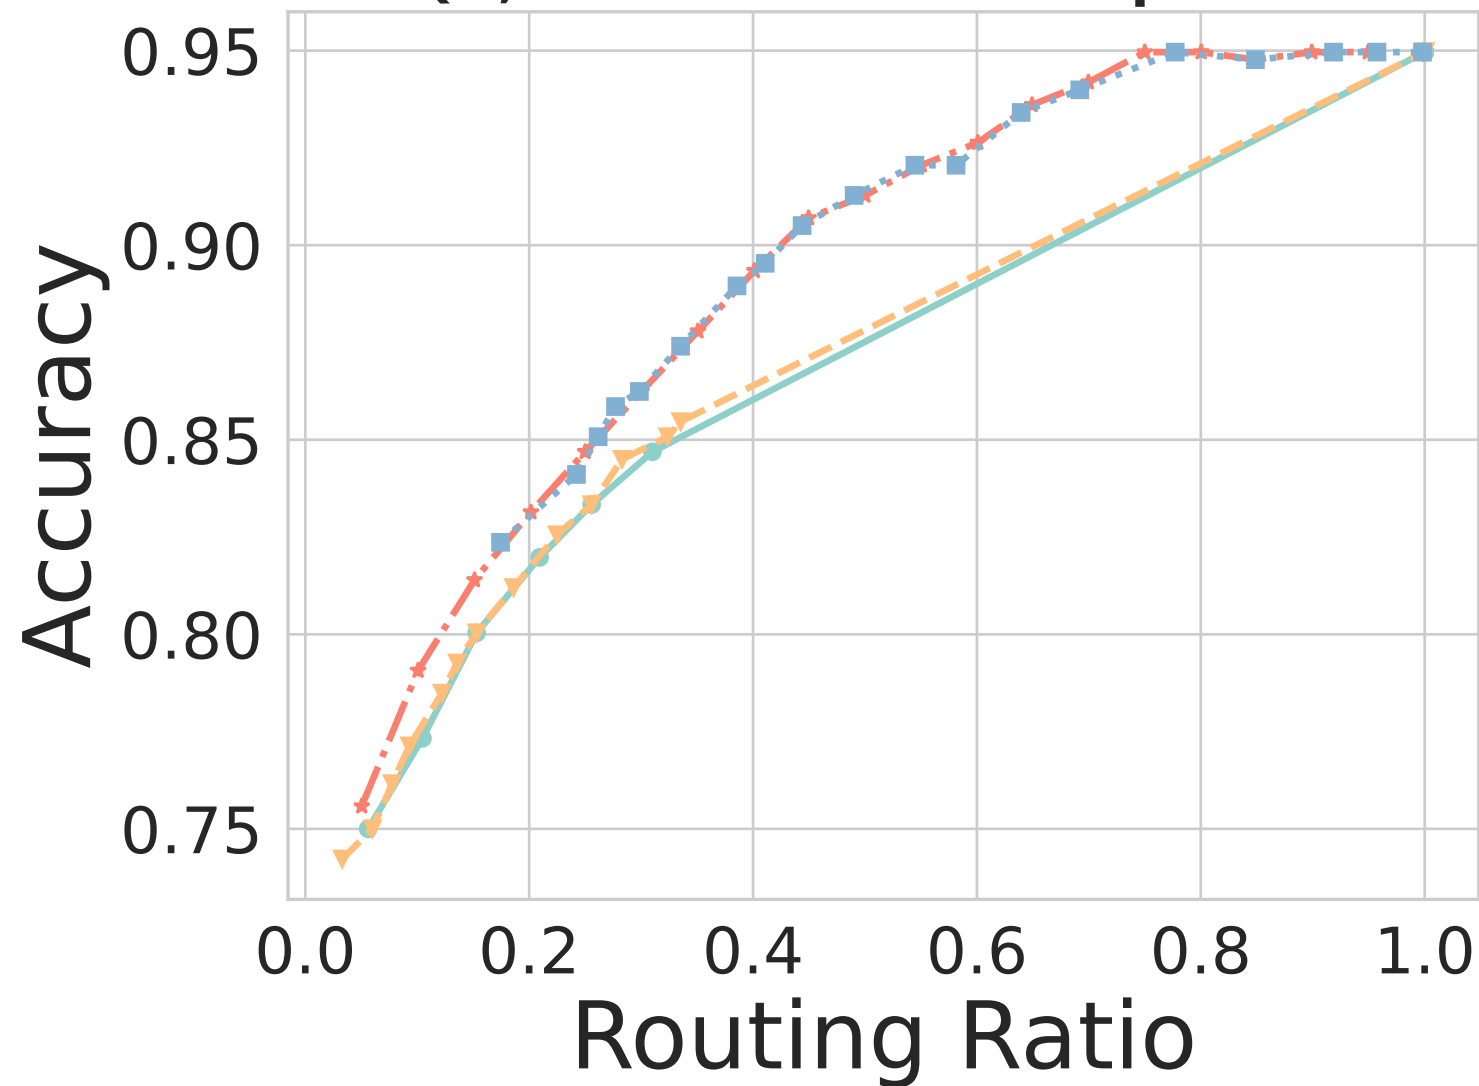

Supplement: supplementary_material [file cali_down_pi_qa_llama-3.2-3b_deepseek-reasoner.pdf › Routing_SLM_LLMs/Proxy_routing_prediction/to_deepseek-reasoner/pi_qa_as_downstream/cali_down_pi_qa_llama-3.2-3b_deepseek-reasoner.pdf]

**PIQA, mistral-7b to DeepSeek-R1**

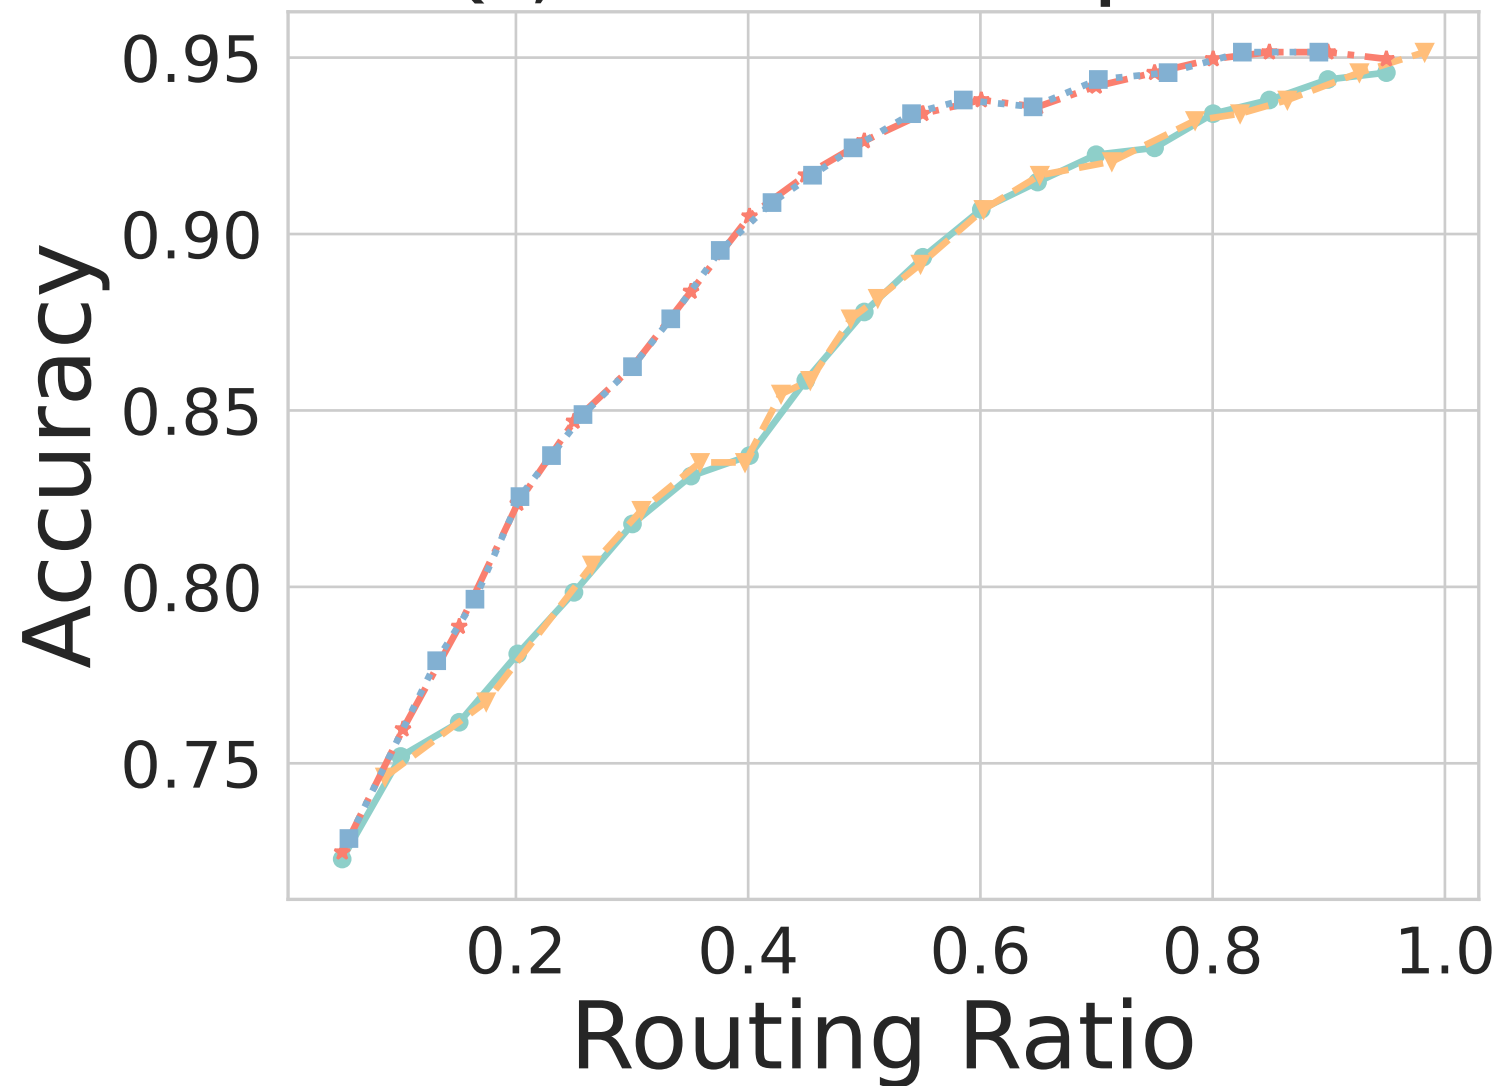

Supplement: supplementary_material [file cali_down_pi_qa_mistral-7b_deepseek-reasoner.pdf › Routing_SLM_LLMs/Proxy_routing_prediction/to_deepseek-reasoner/pi_qa_as_downstream/cali_down_pi_qa_mistral-7b_deepseek-reasoner.pdf]

**PIQA, phi-3.5-mini to DeepSeek-R1**

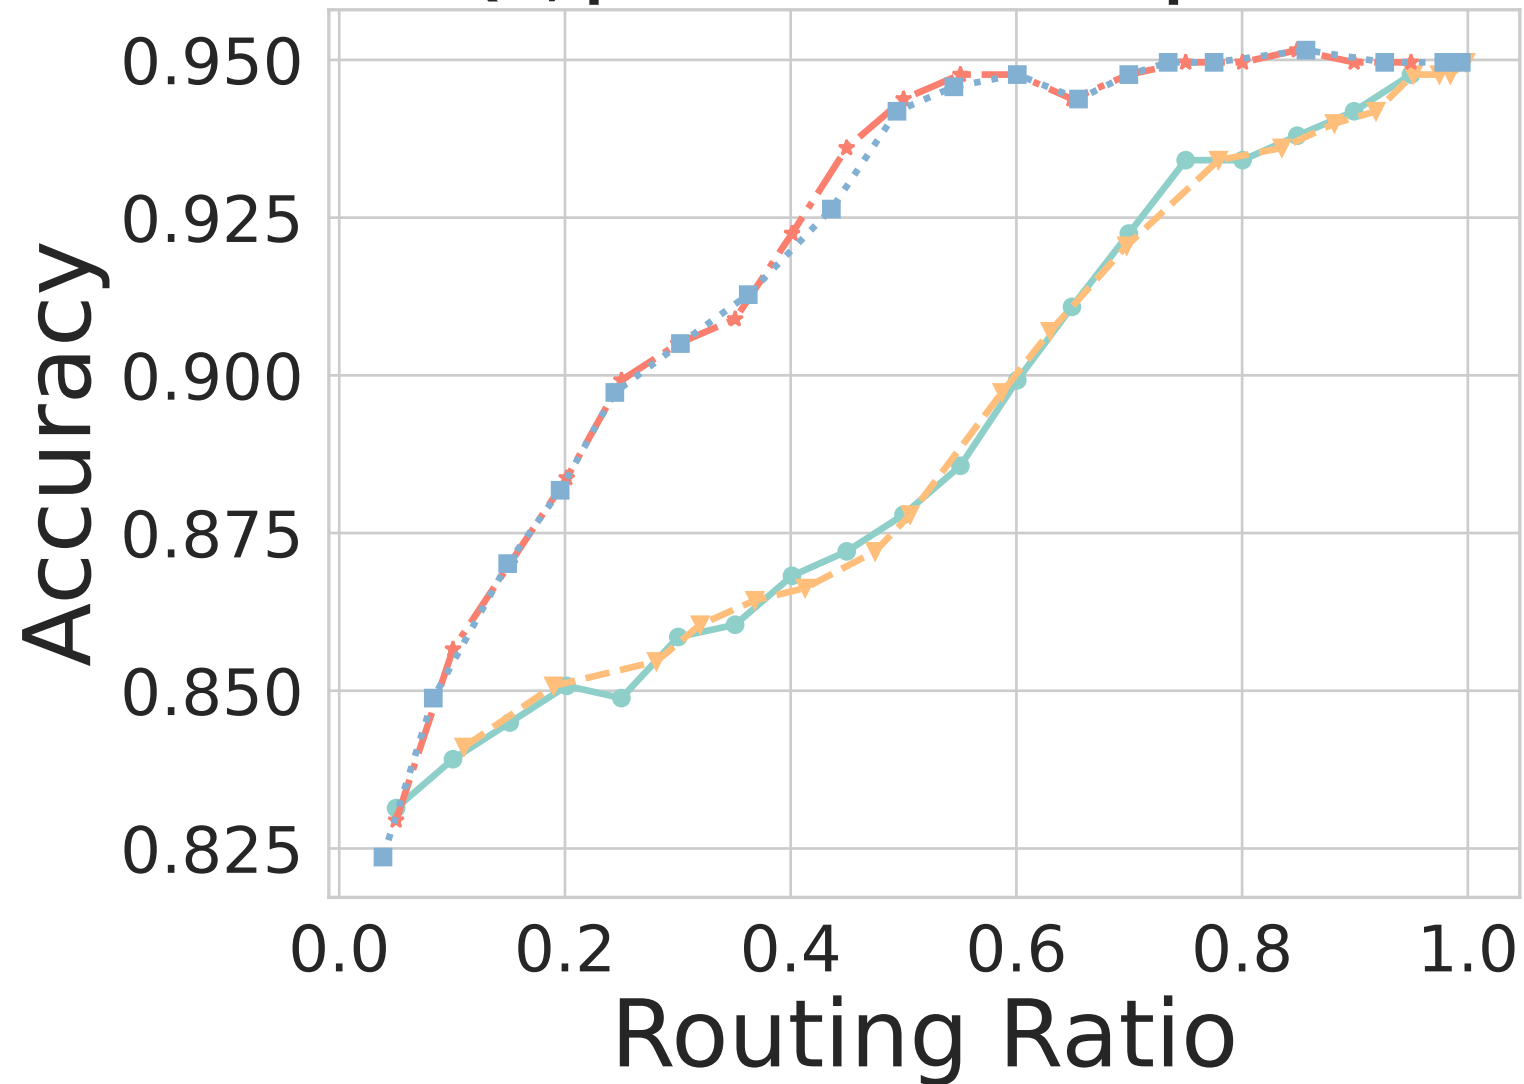

Supplement: supplementary_material [file cali_down_pi_qa_phi-3.5-mini_deepseek-reasoner.pdf › Routing_SLM_LLMs/Proxy_routing_prediction/to_deepseek-reasoner/pi_qa_as_downstream/cali_down_pi_qa_phi-3.5-mini_deepseek-reasoner.pdf]

**PIQA, phi-4-mini-reasoning to DeepSeek-R1**

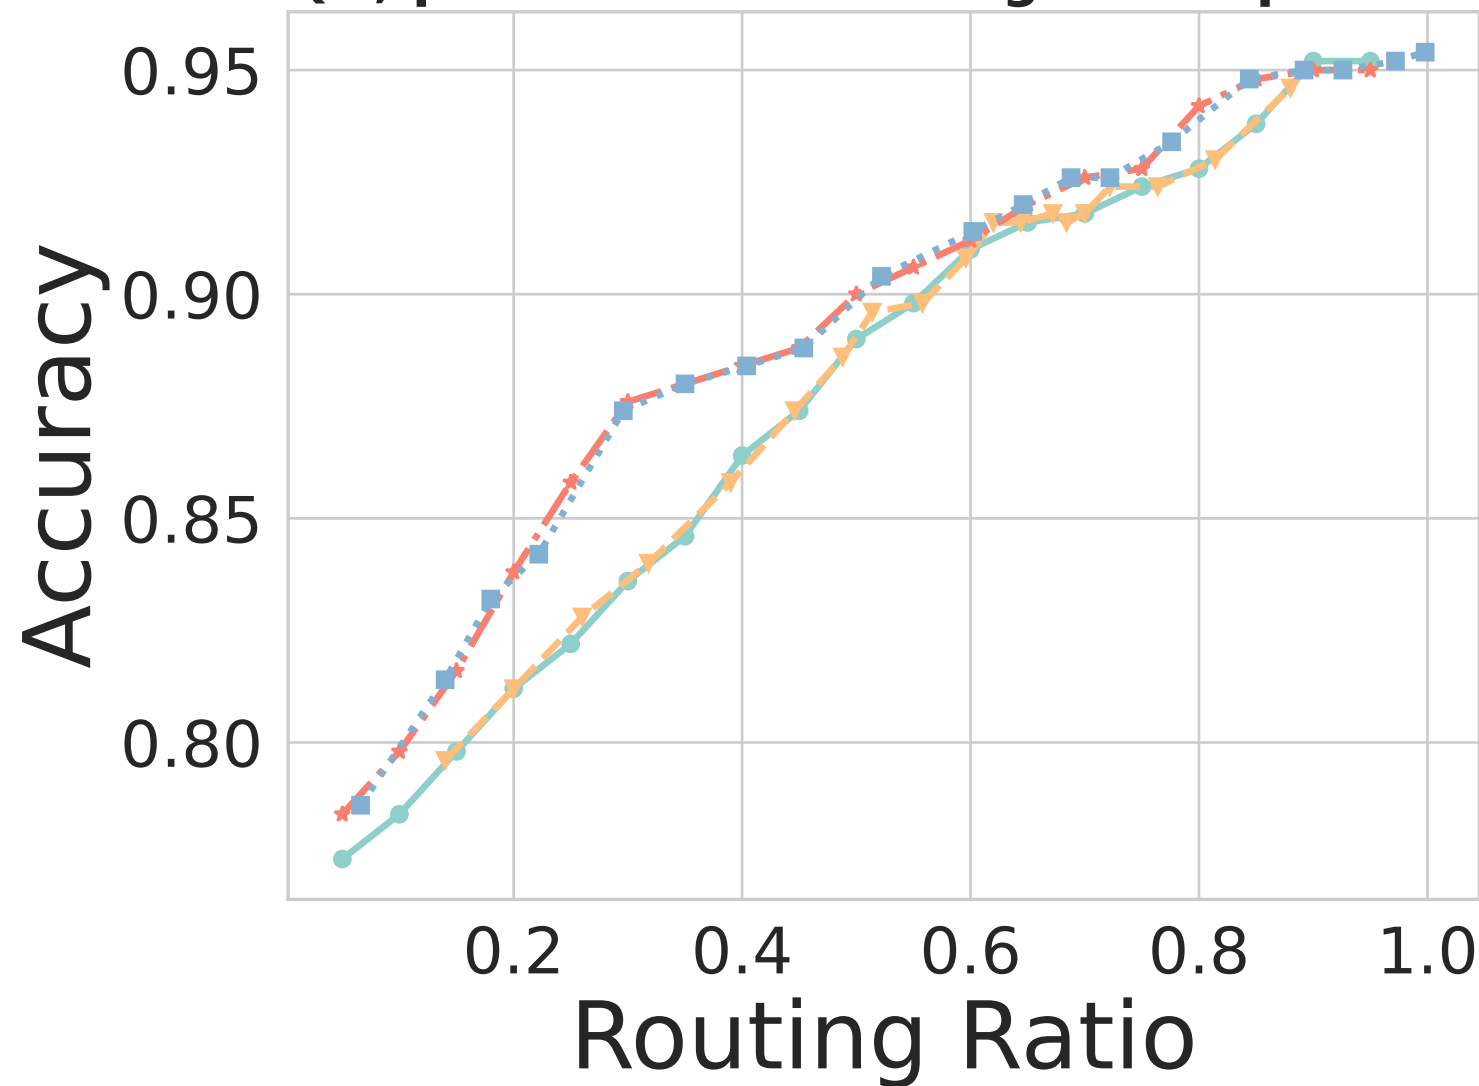

Supplement: supplementary_material [file cali_down_pi_qa_phi-4-mini-reasoning_deepseek-reasoner.pdf › Routing_SLM_LLMs/Proxy_routing_prediction/to_deepseek-reasoner/pi_qa_as_downstream/cali_down_pi_qa_phi-4-mini-reasoning_deepseek-reasoner.pdf]

**PIQA, qwen-2.5-7b to DeepSeek-R1**

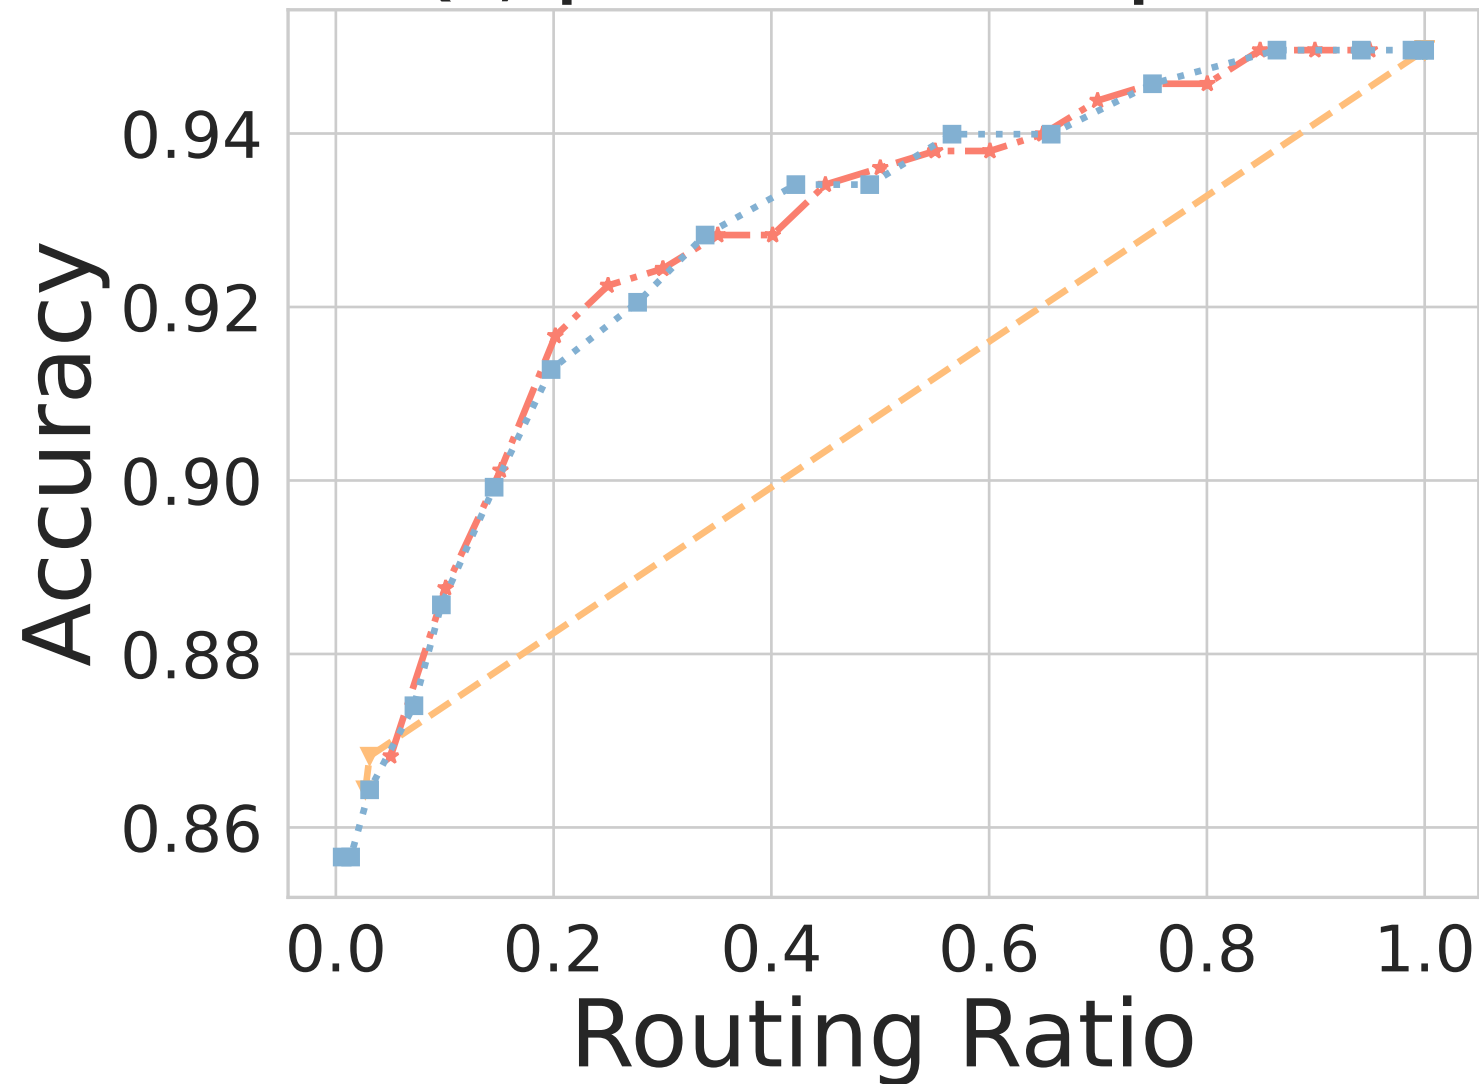

Supplement: supplementary_material [file cali_down_pi_qa_qwen-2.5-7b_deepseek-reasoner.pdf › Routing_SLM_LLMs/Proxy_routing_prediction/to_deepseek-reasoner/pi_qa_as_downstream/cali_down_pi_qa_qwen-2.5-7b_deepseek-reasoner.pdf]

**PIQA, rwkv to DeepSeek-R1**

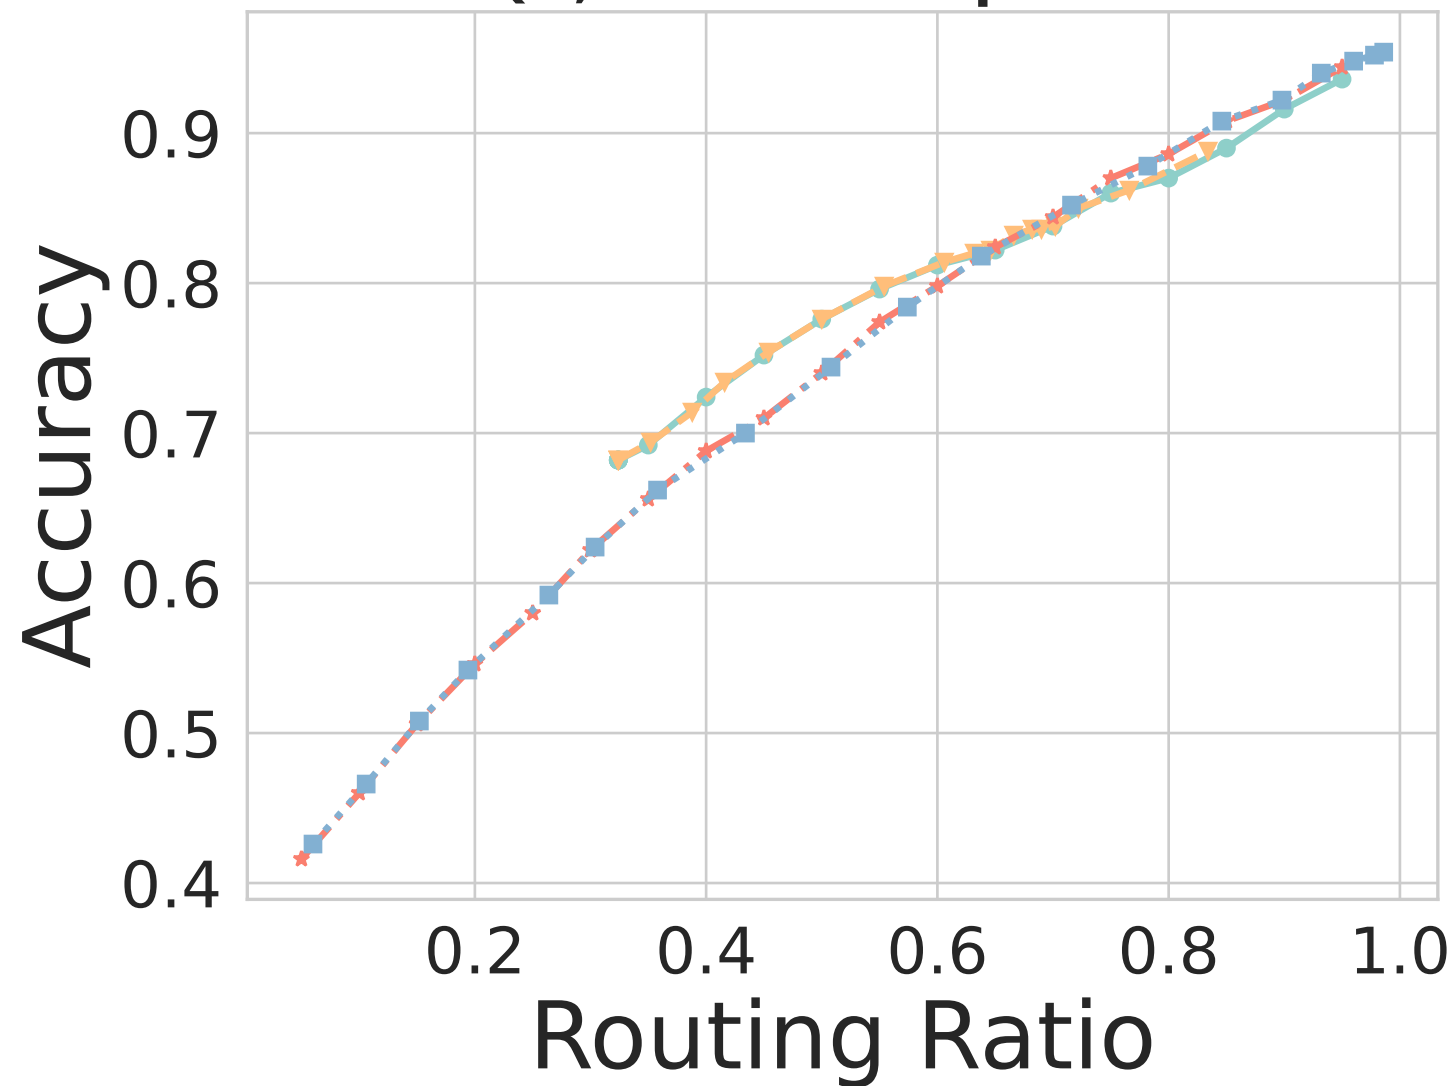

Supplement: supplementary_material [file cali_down_pi_qa_rwkv_deepseek-reasoner.pdf › Routing_SLM_LLMs/Proxy_routing_prediction/to_deepseek-reasoner/pi_qa_as_downstream/cali_down_pi_qa_rwkv_deepseek-reasoner.pdf]

**Social IQa, Qwen3-0.6B to DeepSeek-R1**

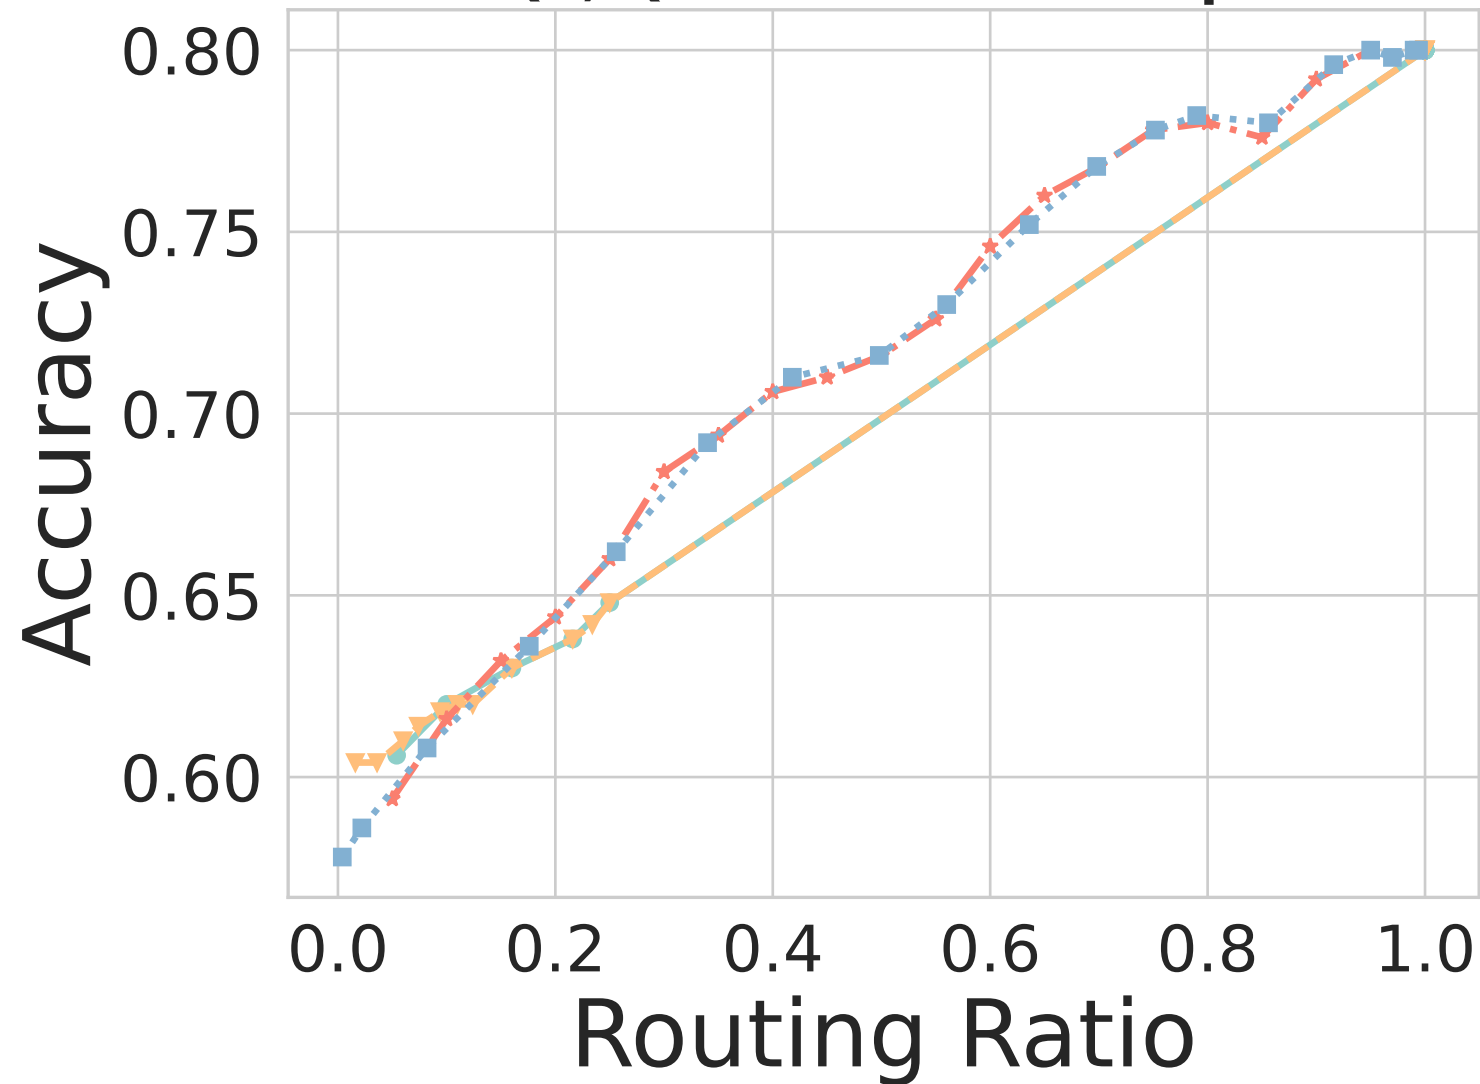

Supplement: supplementary_material [file cali_down_social_i_qa_Qwen3-0.6B_deepseek-reasoner.pdf › Routing_SLM_LLMs/Proxy_routing_prediction/to_deepseek-reasoner/social_i_qa_as_downstream/cali_down_social_i_qa_Qwen3-0.6B_deepseek-reasoner.pdf]

**Social IQa, Qwen3-1.7B to DeepSeek-R1**

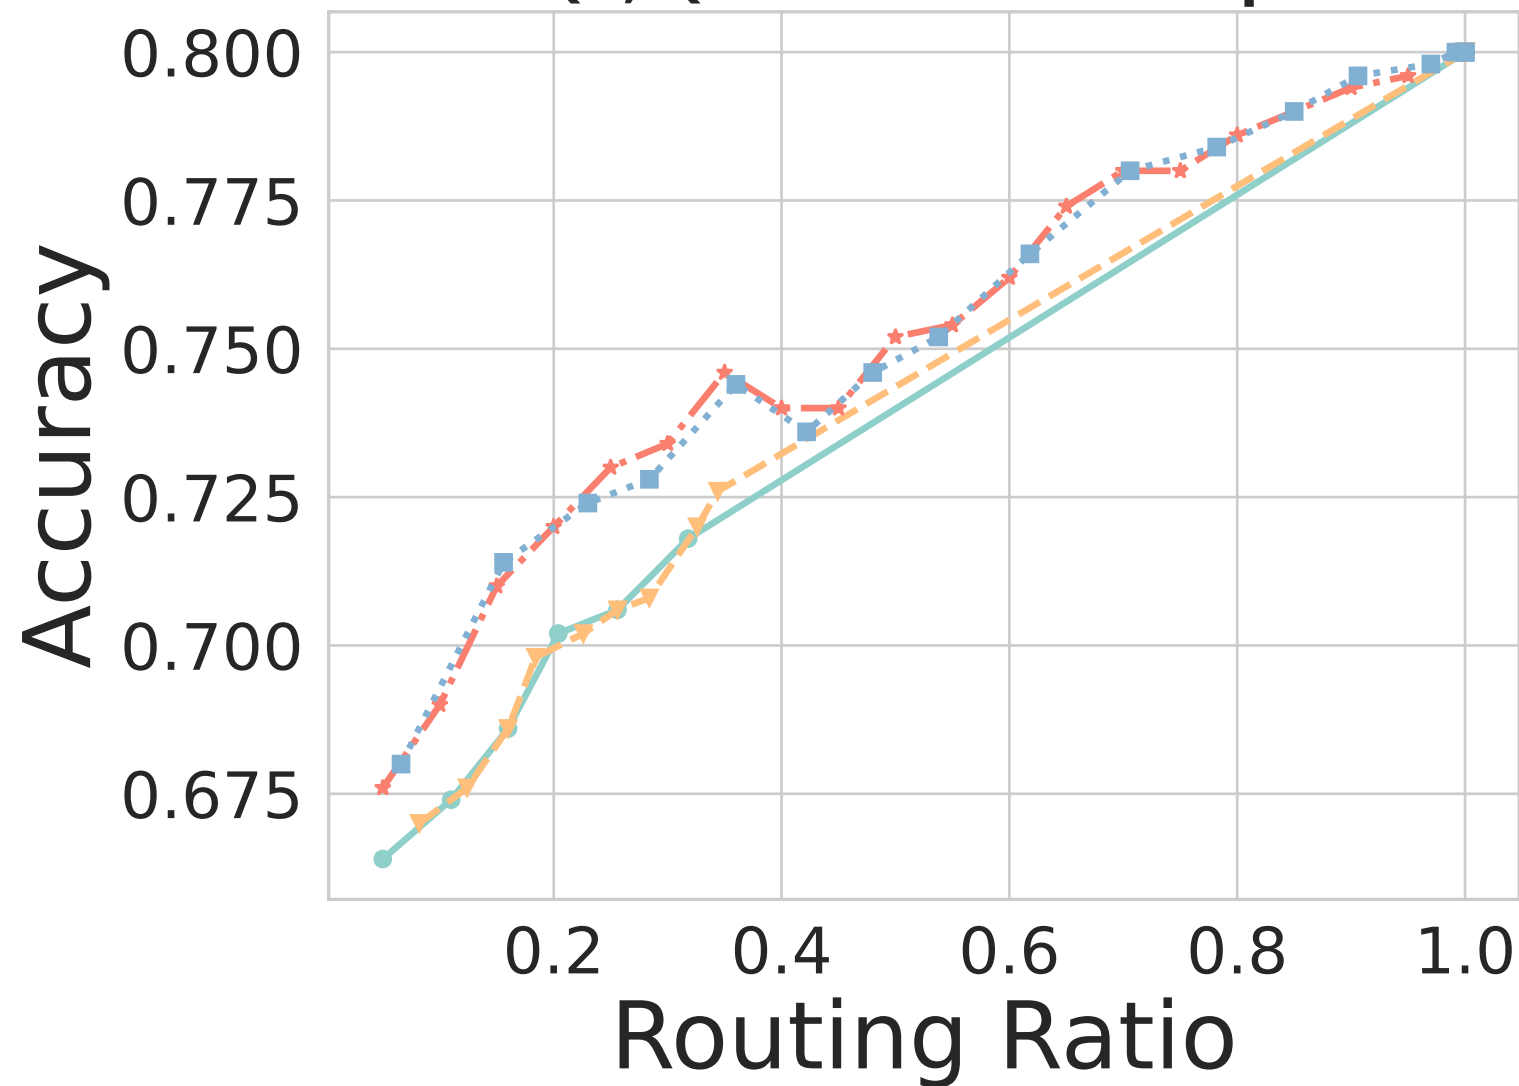

Supplement: supplementary_material [file cali_down_social_i_qa_Qwen3-1.7B_deepseek-reasoner.pdf › Routing_SLM_LLMs/Proxy_routing_prediction/to_deepseek-reasoner/social_i_qa_as_downstream/cali_down_social_i_qa_Qwen3-1.7B_deepseek-reasoner.pdf]

**Social IQa, Qwen3-4B to DeepSeek-R1**

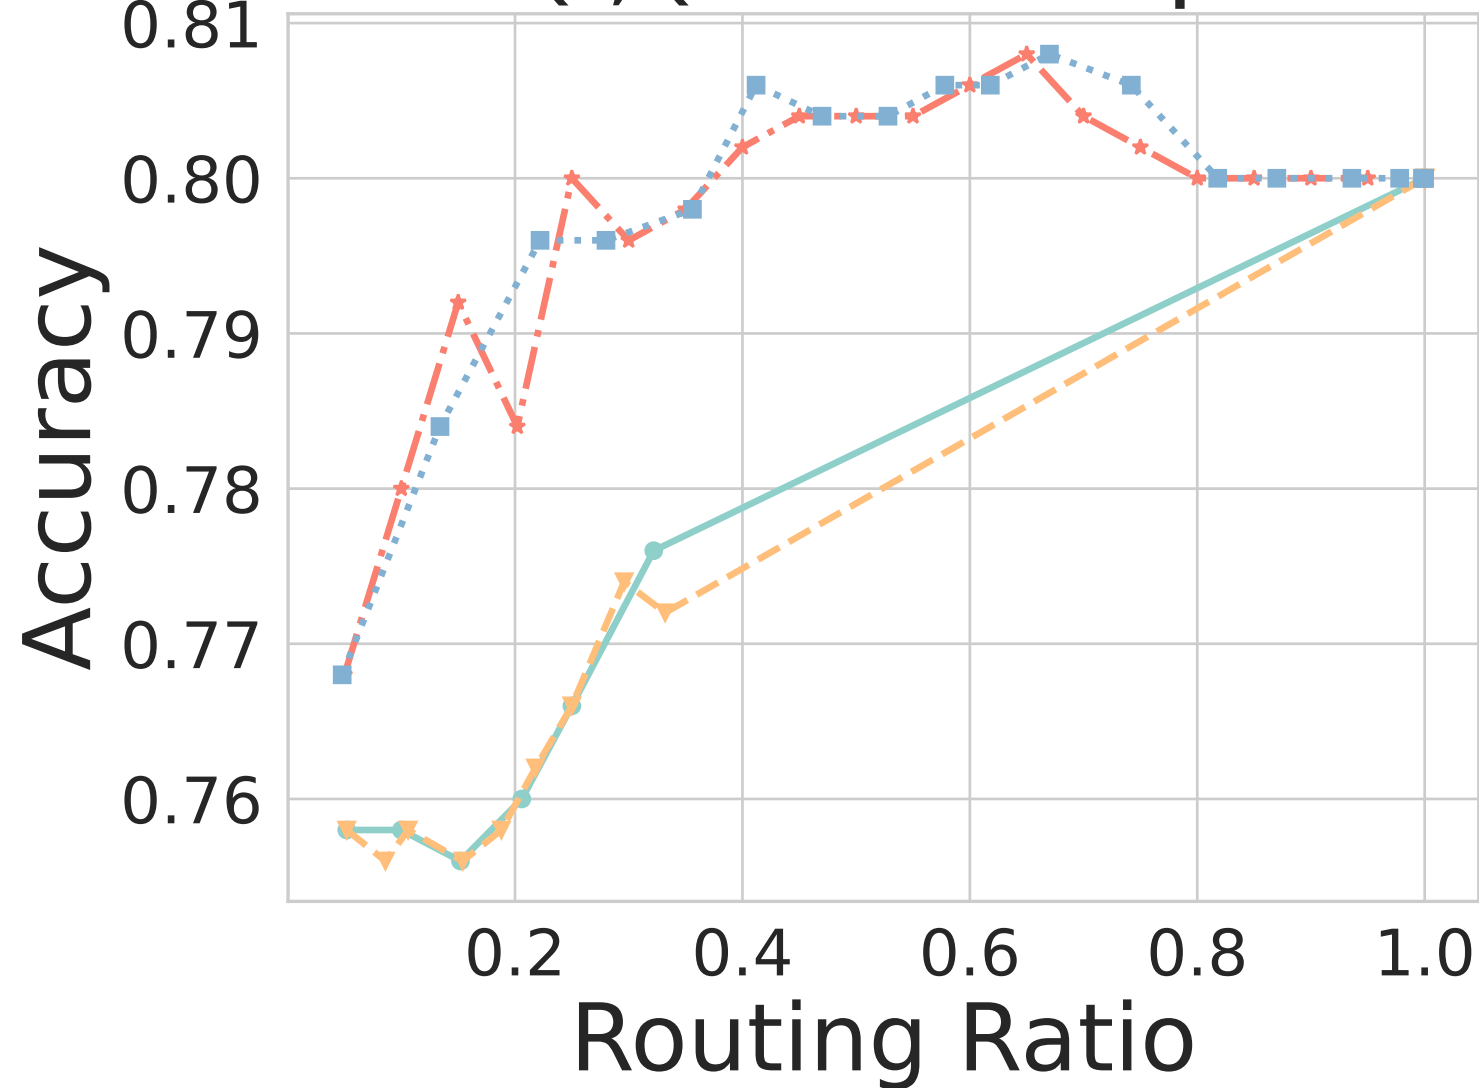

Supplement: supplementary_material [file cali_down_social_i_qa_Qwen3-4B_deepseek-reasoner.pdf › Routing_SLM_LLMs/Proxy_routing_prediction/to_deepseek-reasoner/social_i_qa_as_downstream/cali_down_social_i_qa_Qwen3-4B_deepseek-reasoner.pdf]

**Social IQa, granite-3.1-8b to DeepSeek-R1**

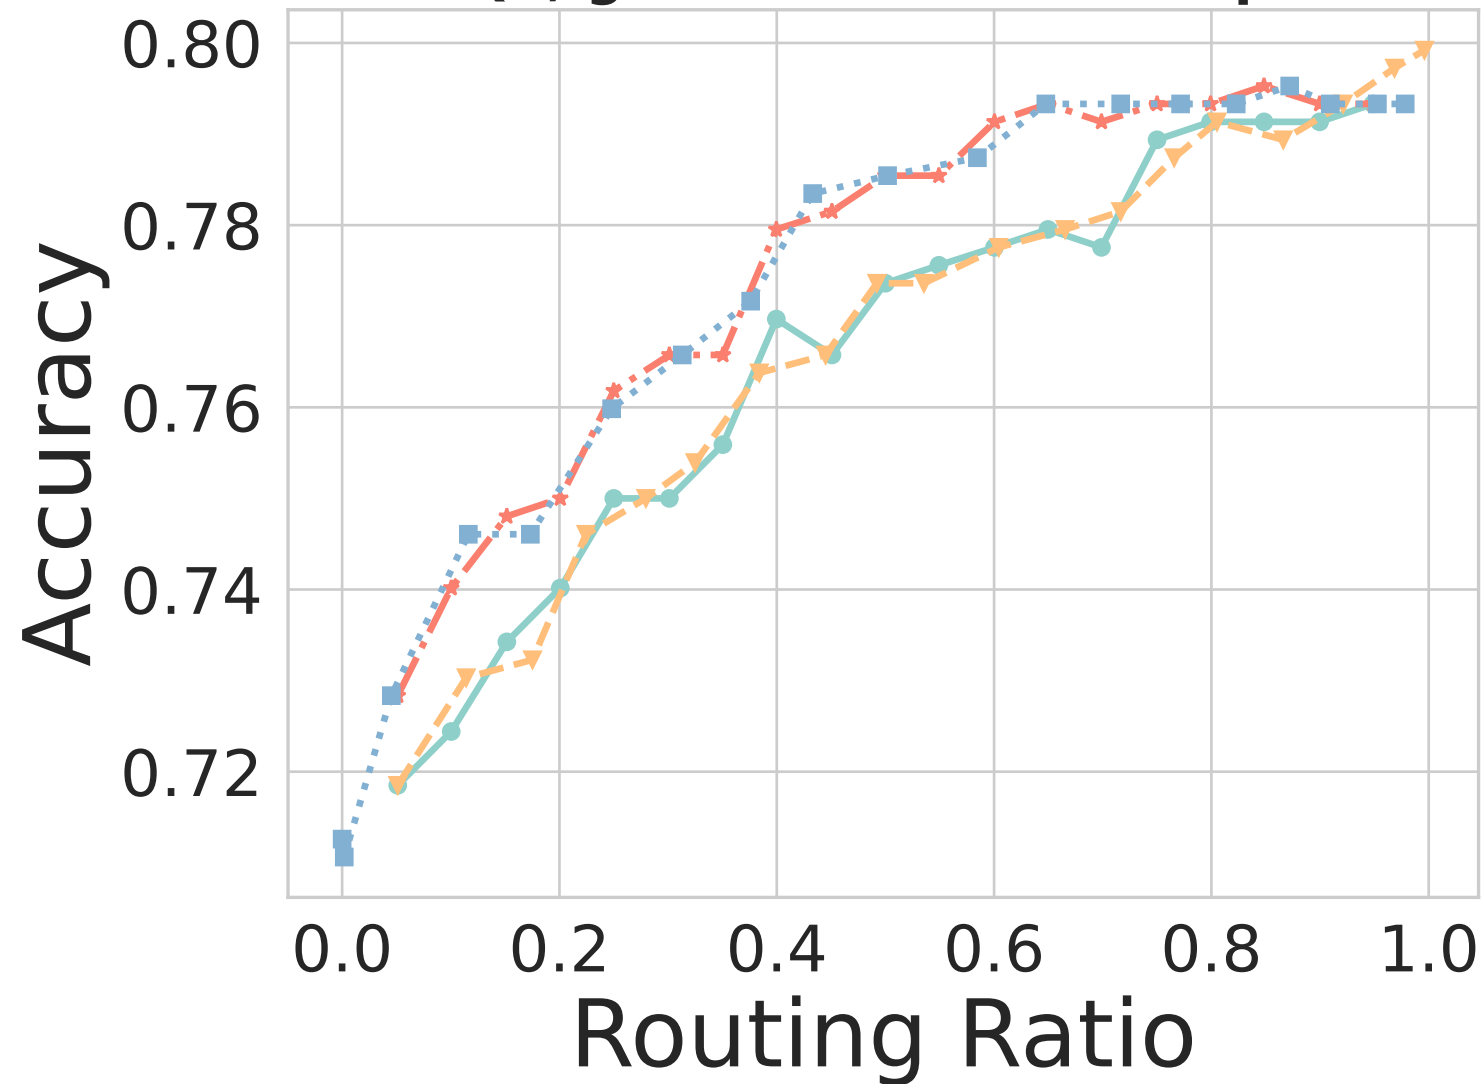

Supplement: supplementary_material [file cali_down_social_i_qa_granite-3.1-8b_deepseek-reasoner.pdf › Routing_SLM_LLMs/Proxy_routing_prediction/to_deepseek-reasoner/social_i_qa_as_downstream/cali_down_social_i_qa_granite-3.1-8b_deepseek-reasoner.pdf]

**Social IQa, llama-3.1-8b to DeepSeek-R1**

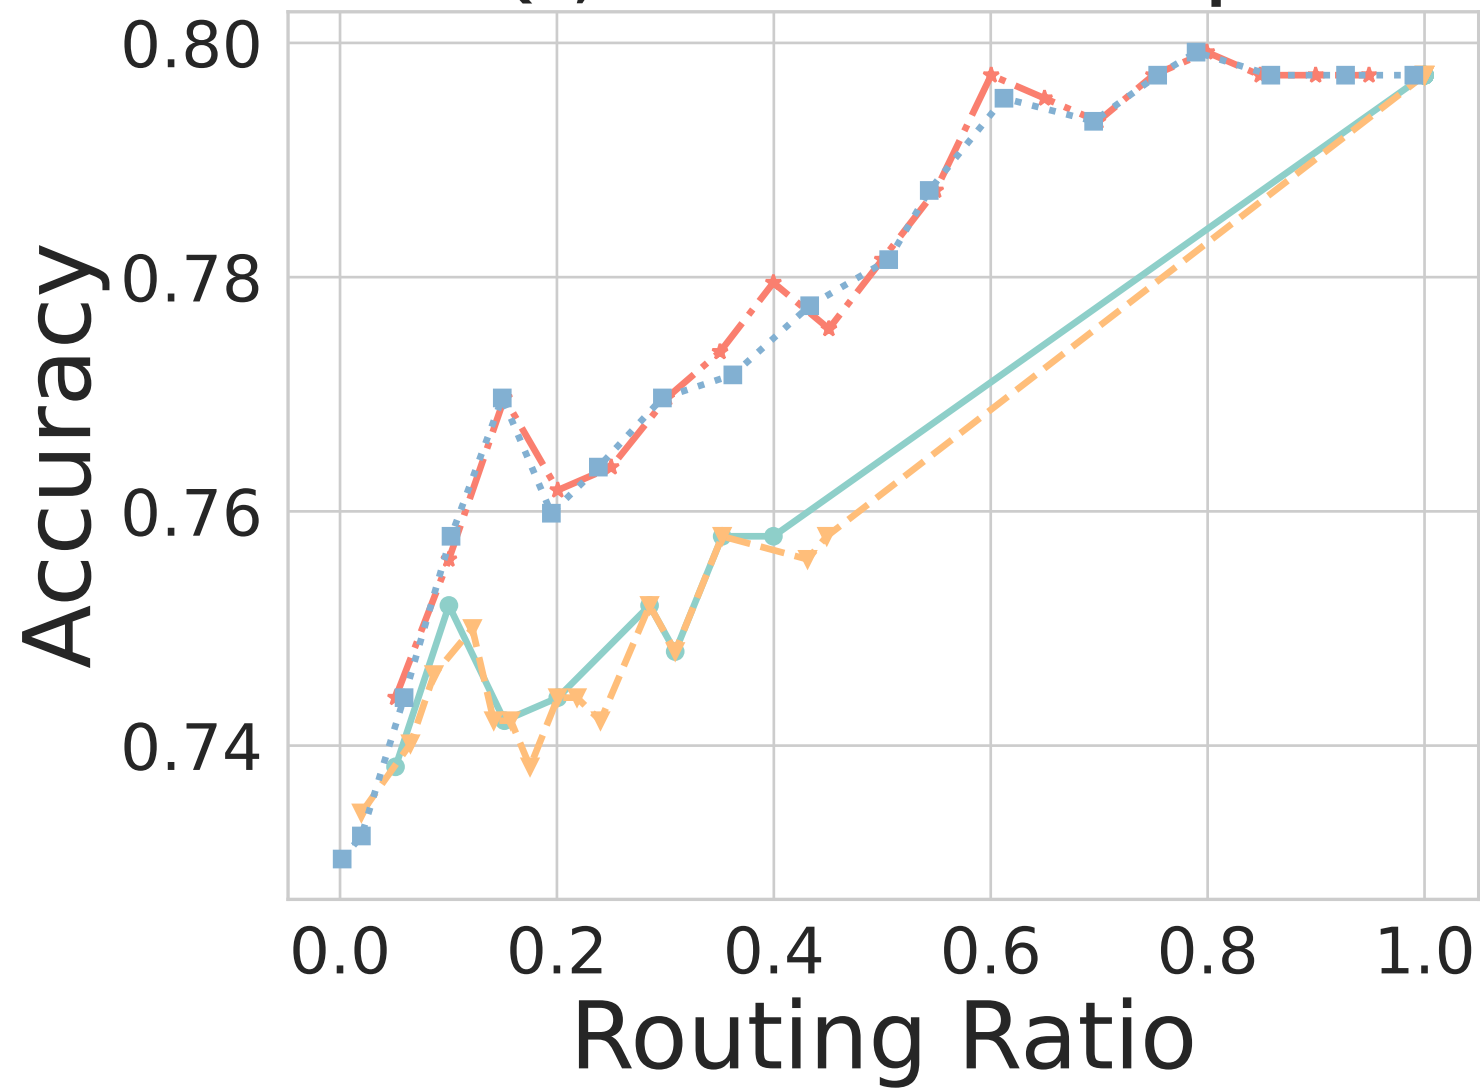

Supplement: supplementary_material [file cali_down_social_i_qa_llama-3.1-8b_deepseek-reasoner.pdf › Routing_SLM_LLMs/Proxy_routing_prediction/to_deepseek-reasoner/social_i_qa_as_downstream/cali_down_social_i_qa_llama-3.1-8b_deepseek-reasoner.pdf]

# Social IQa, llama-3.2-1b to DeepSeek-R1

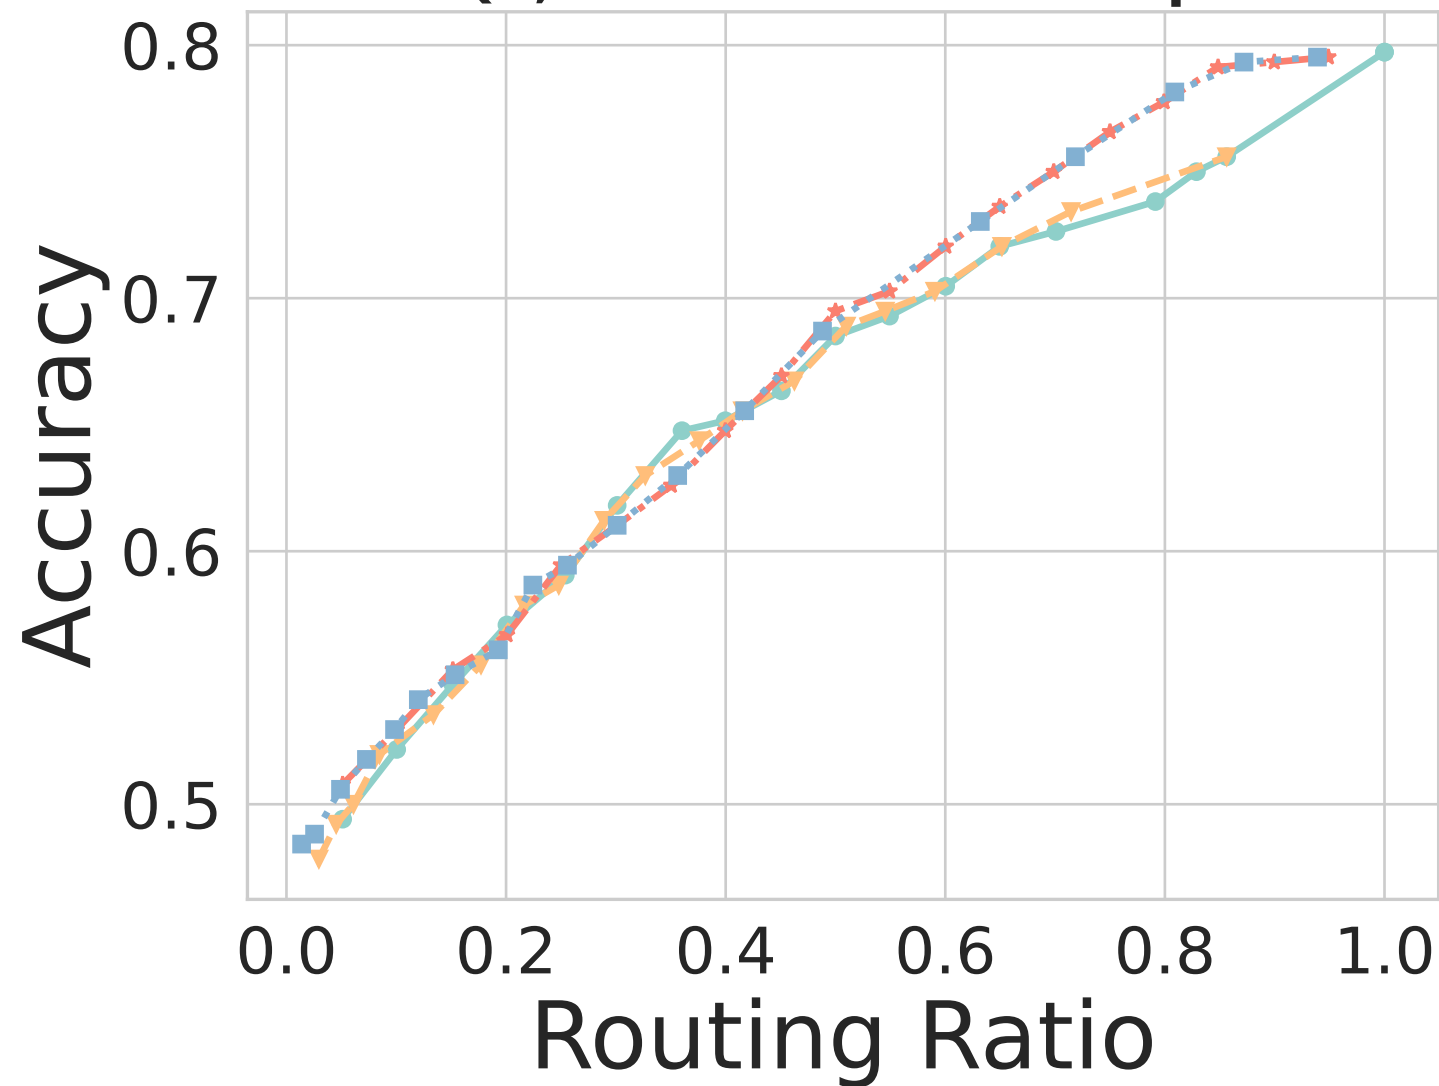

Supplement: supplementary_material [file cali_down_social_i_qa_llama-3.2-1b_deepseek-reasoner.pdf › Routing_SLM_LLMs/Proxy_routing_prediction/to_deepseek-reasoner/social_i_qa_as_downstream/cali_down_social_i_qa_llama-3.2-1b_deepseek-reasoner.pdf]

**Social IQa, llama-3.2-3b to DeepSeek-R1**

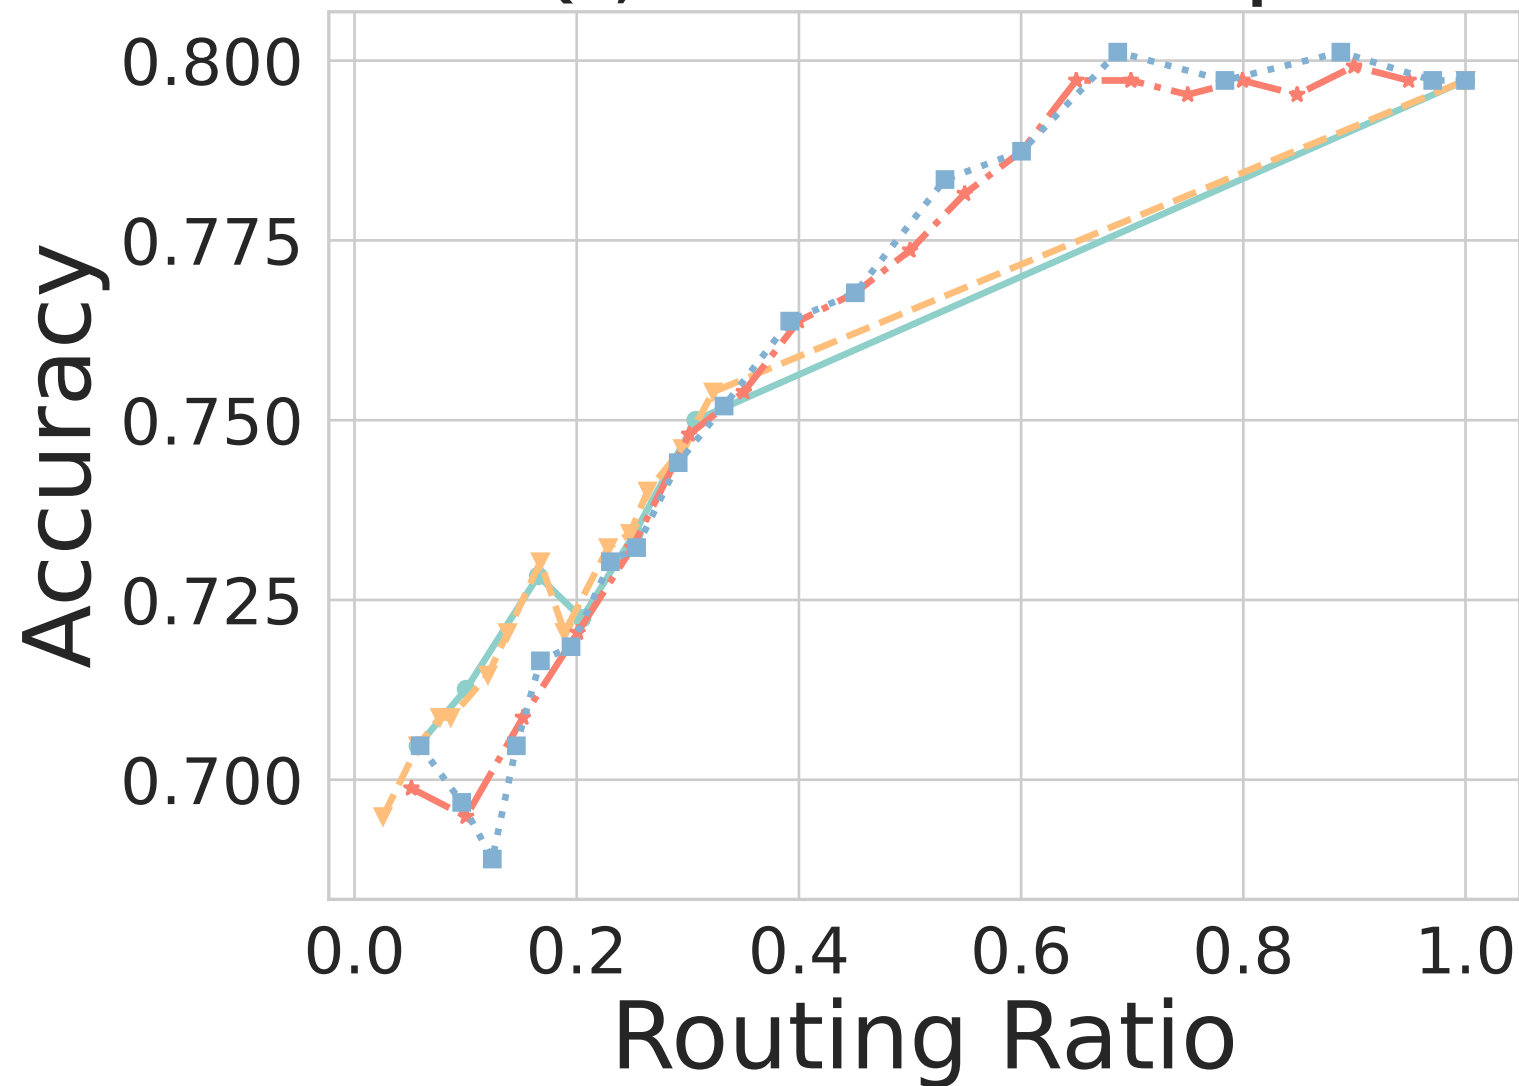

Supplement: supplementary_material [file cali_down_social_i_qa_llama-3.2-3b_deepseek-reasoner.pdf › Routing_SLM_LLMs/Proxy_routing_prediction/to_deepseek-reasoner/social_i_qa_as_downstream/cali_down_social_i_qa_llama-3.2-3b_deepseek-reasoner.pdf]

**Social IQa, mistral-7b to DeepSeek-R1**

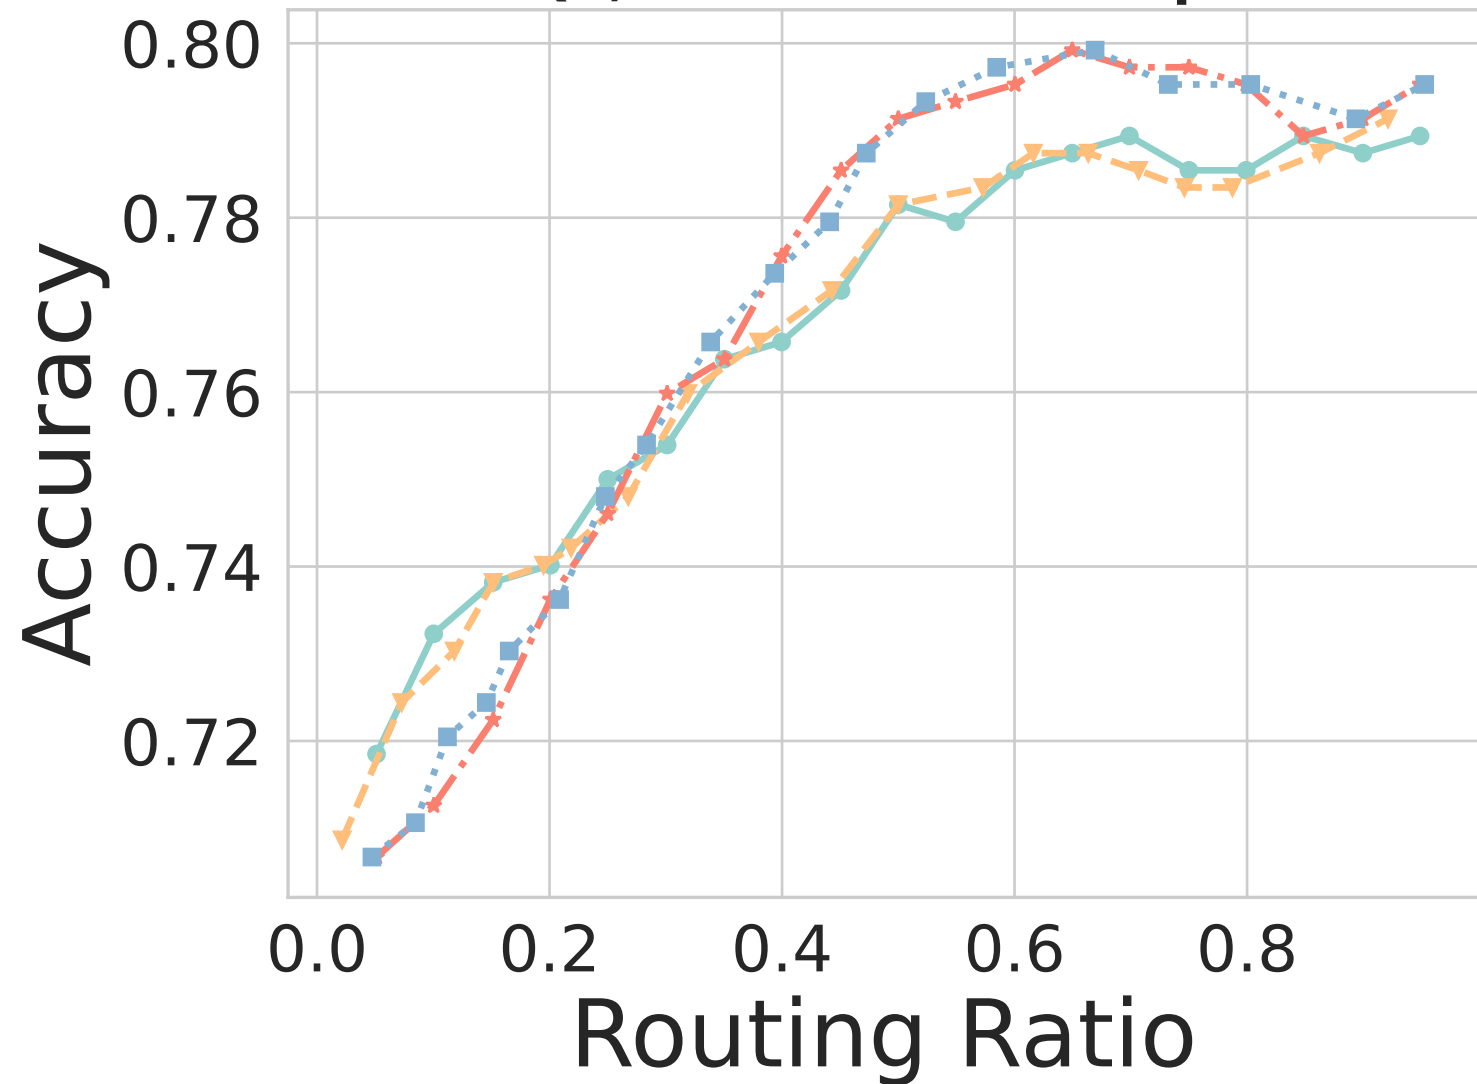

Supplement: supplementary_material [file cali_down_social_i_qa_mistral-7b_deepseek-reasoner.pdf › Routing_SLM_LLMs/Proxy_routing_prediction/to_deepseek-reasoner/social_i_qa_as_downstream/cali_down_social_i_qa_mistral-7b_deepseek-reasoner.pdf]

**Social IQa, phi-3.5-mini to DeepSeek-R1**

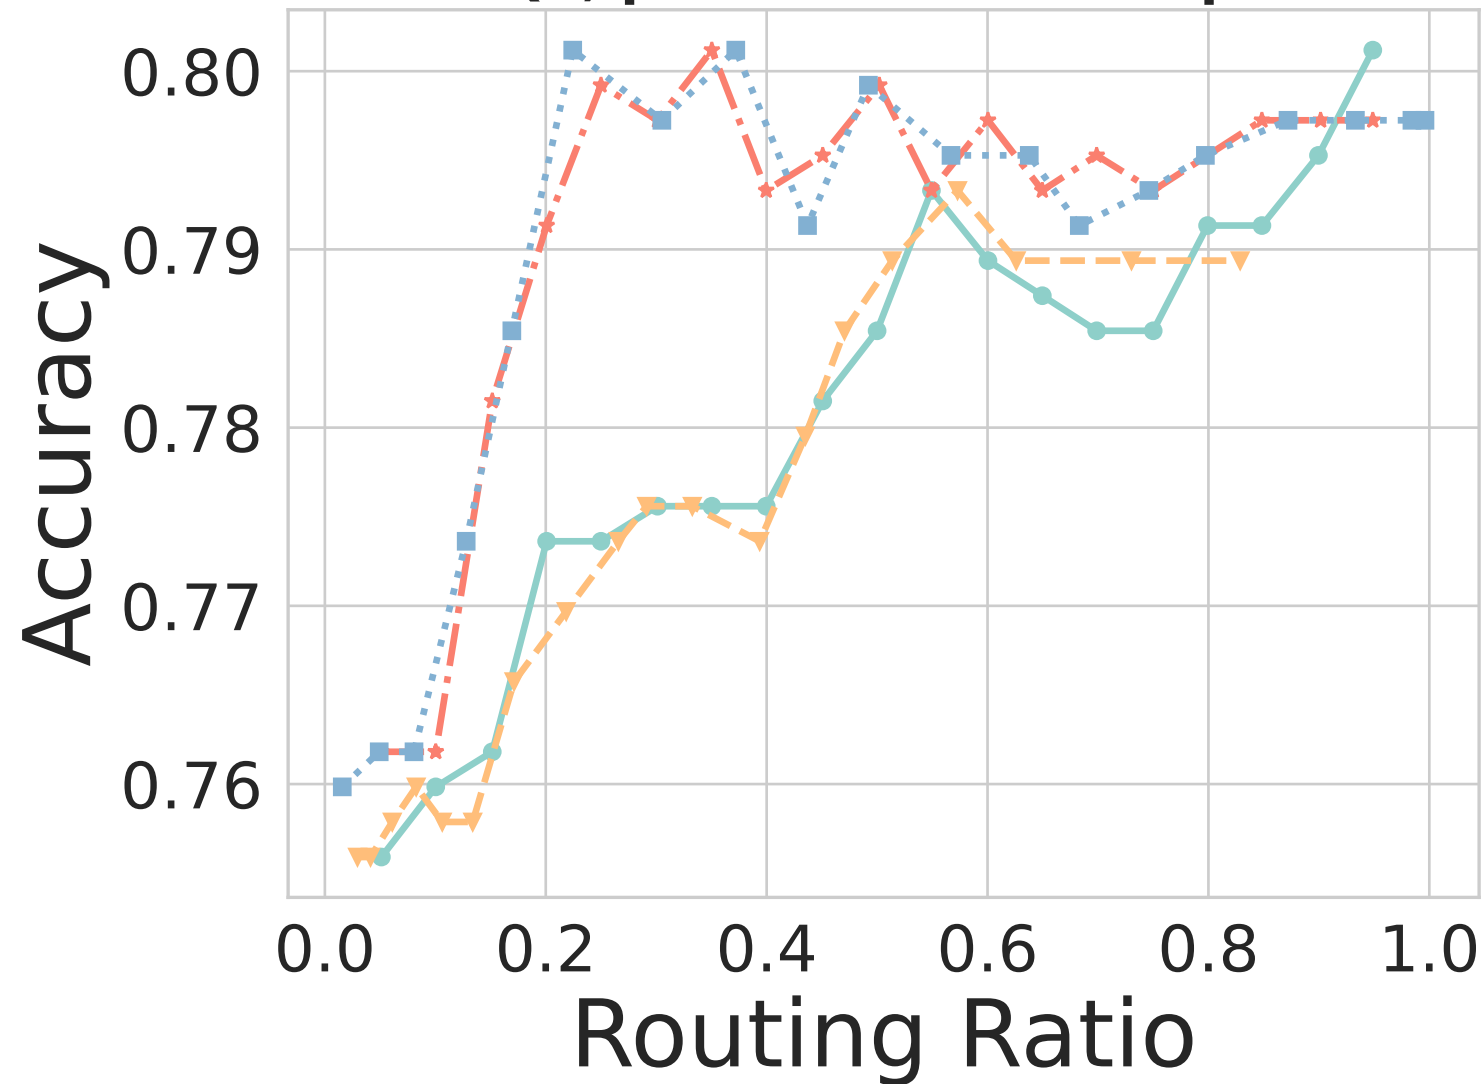

Supplement: supplementary_material [file cali_down_social_i_qa_phi-3.5-mini_deepseek-reasoner.pdf › Routing_SLM_LLMs/Proxy_routing_prediction/to_deepseek-reasoner/social_i_qa_as_downstream/cali_down_social_i_qa_phi-3.5-mini_deepseek-reasoner.pdf]

**Social IQa, phi-4-mini-reasoning to DeepSeek-R1**

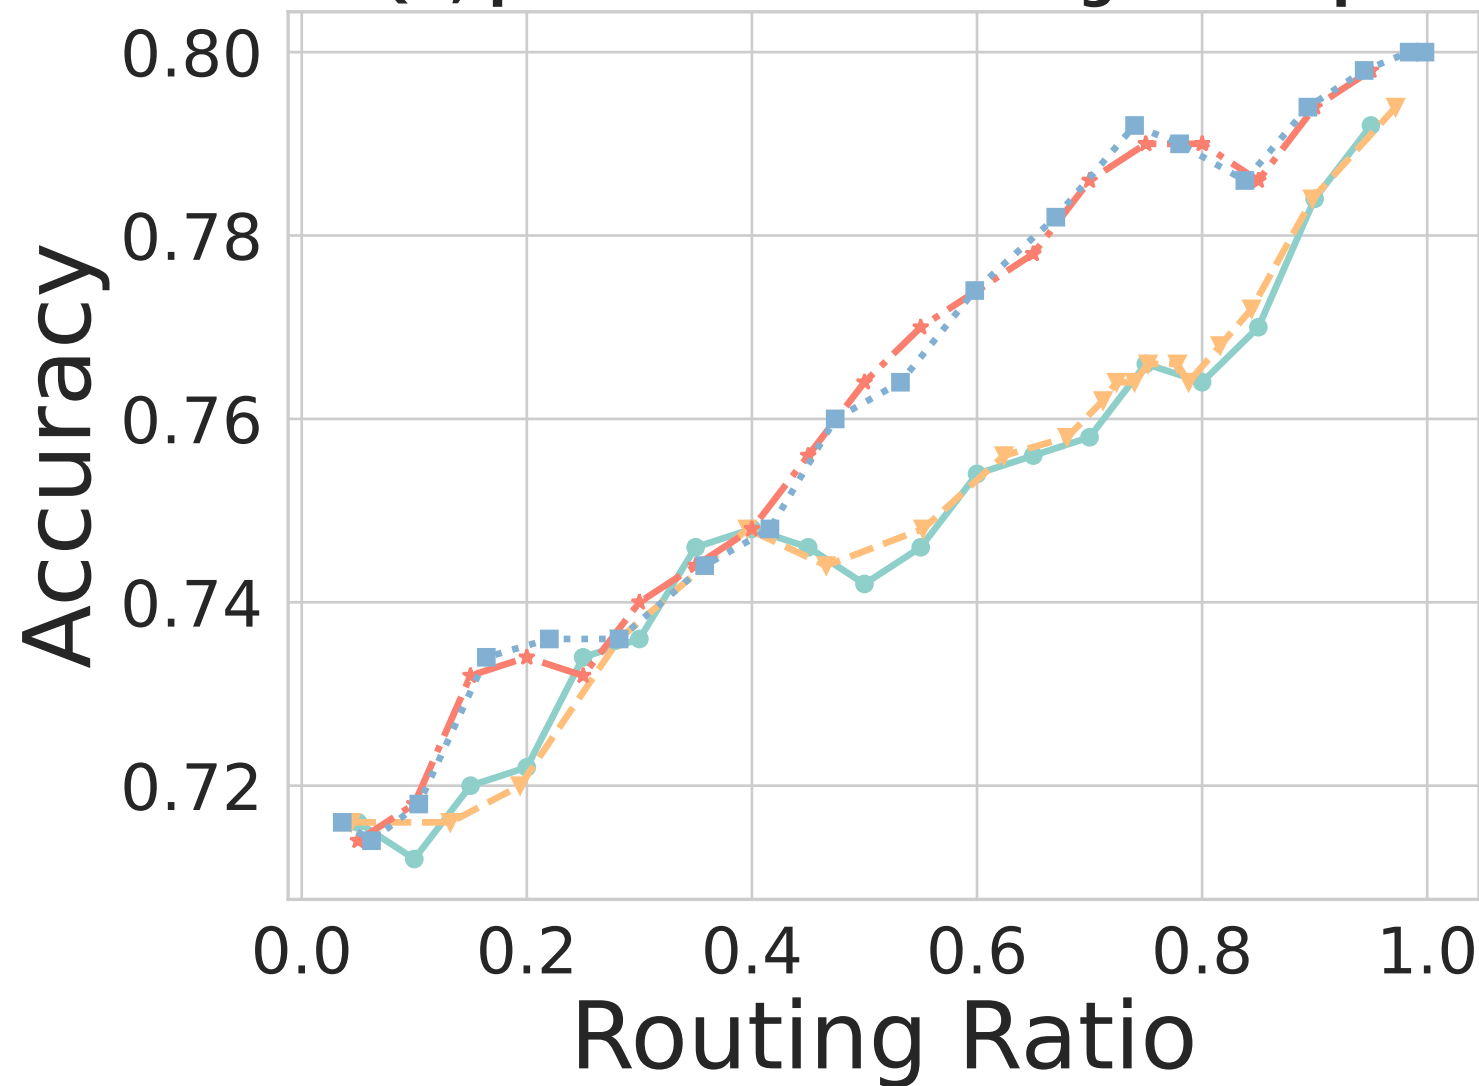

Supplement: supplementary_material [file cali_down_social_i_qa_phi-4-mini-reasoning_deepseek-reasoner.pdf › Routing_SLM_LLMs/Proxy_routing_prediction/to_deepseek-reasoner/social_i_qa_as_downstream/cali_down_social_i_qa_phi-4-mini-reasoning_deepseek-reasoner.pdf]

**Social IQa, qwen-2.5-7b to DeepSeek-R1**

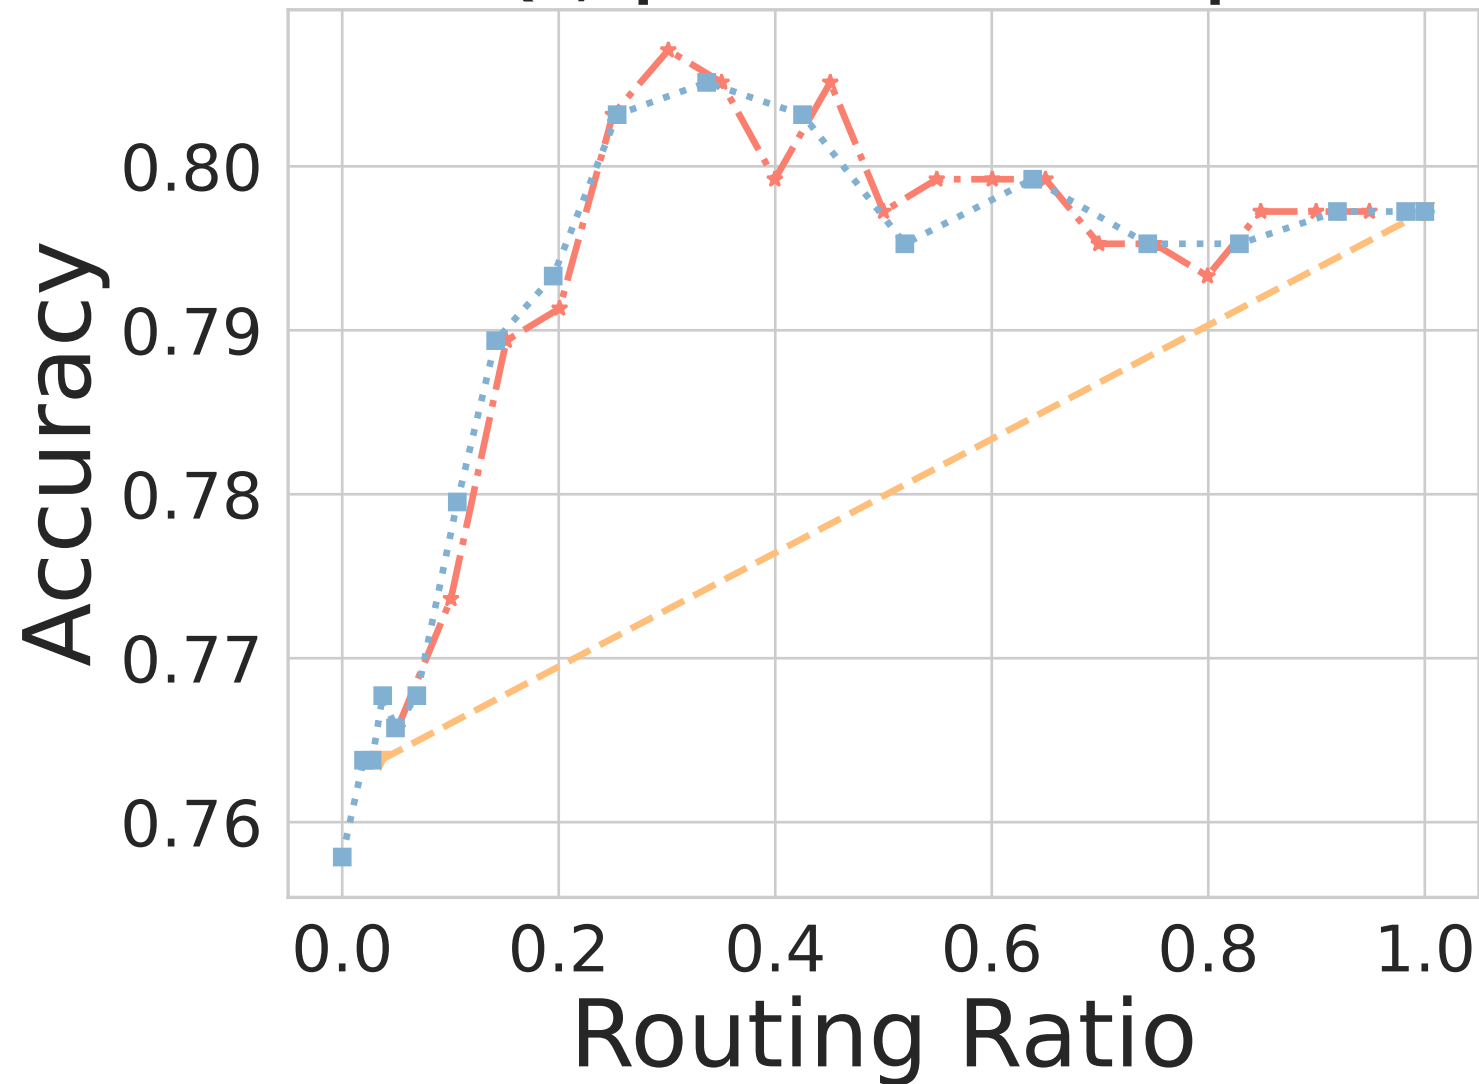

Supplement: supplementary_material [file cali_down_social_i_qa_qwen-2.5-7b_deepseek-reasoner.pdf › Routing_SLM_LLMs/Proxy_routing_prediction/to_deepseek-reasoner/social_i_qa_as_downstream/cali_down_social_i_qa_qwen-2.5-7b_deepseek-reasoner.pdf]

**Social IQa, rwkv to DeepSeek-R1**

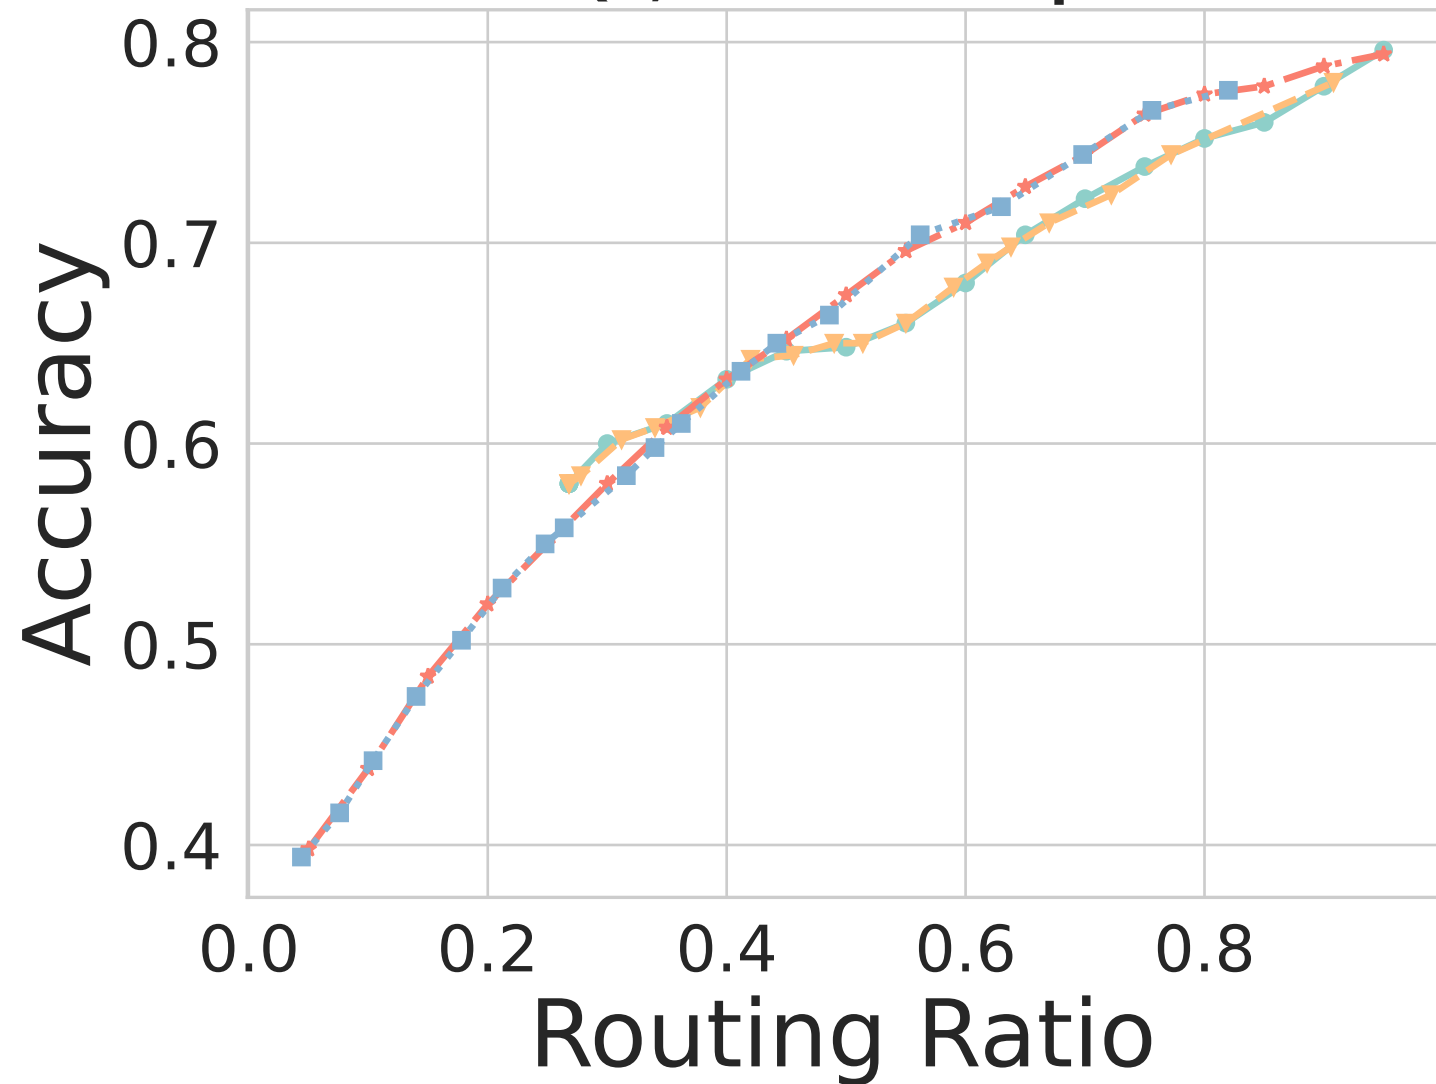

Supplement: supplementary_material [file cali_down_social_i_qa_rwkv_deepseek-reasoner.pdf › Routing_SLM_LLMs/Proxy_routing_prediction/to_deepseek-reasoner/social_i_qa_as_downstream/cali_down_social_i_qa_rwkv_deepseek-reasoner.pdf]

**SVAMP, Qwen3-0.6B to DeepSeek-R1**

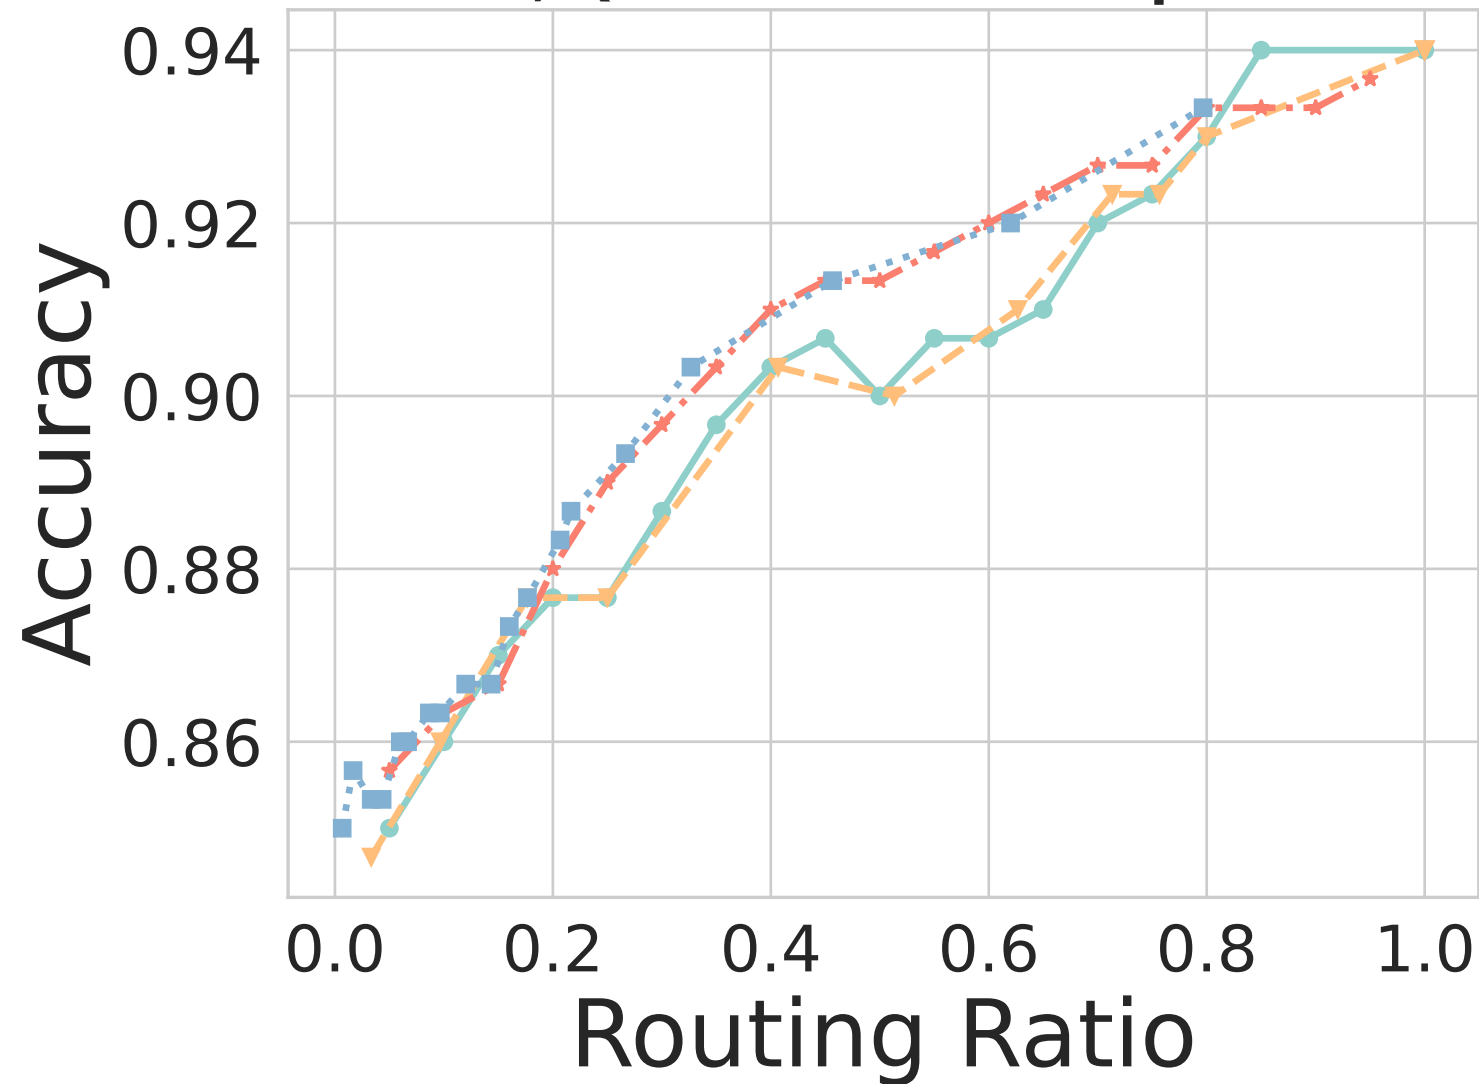

Supplement: supplementary_material [file cali_down_svamp_Qwen3-0.6B_deepseek-reasoner.pdf › Routing_SLM_LLMs/Proxy_routing_prediction/to_deepseek-reasoner/svamp_as_downstream/cali_down_svamp_Qwen3-0.6B_deepseek-reasoner.pdf]

**SVAMP, Qwen3-1.7B to DeepSeek-R1**

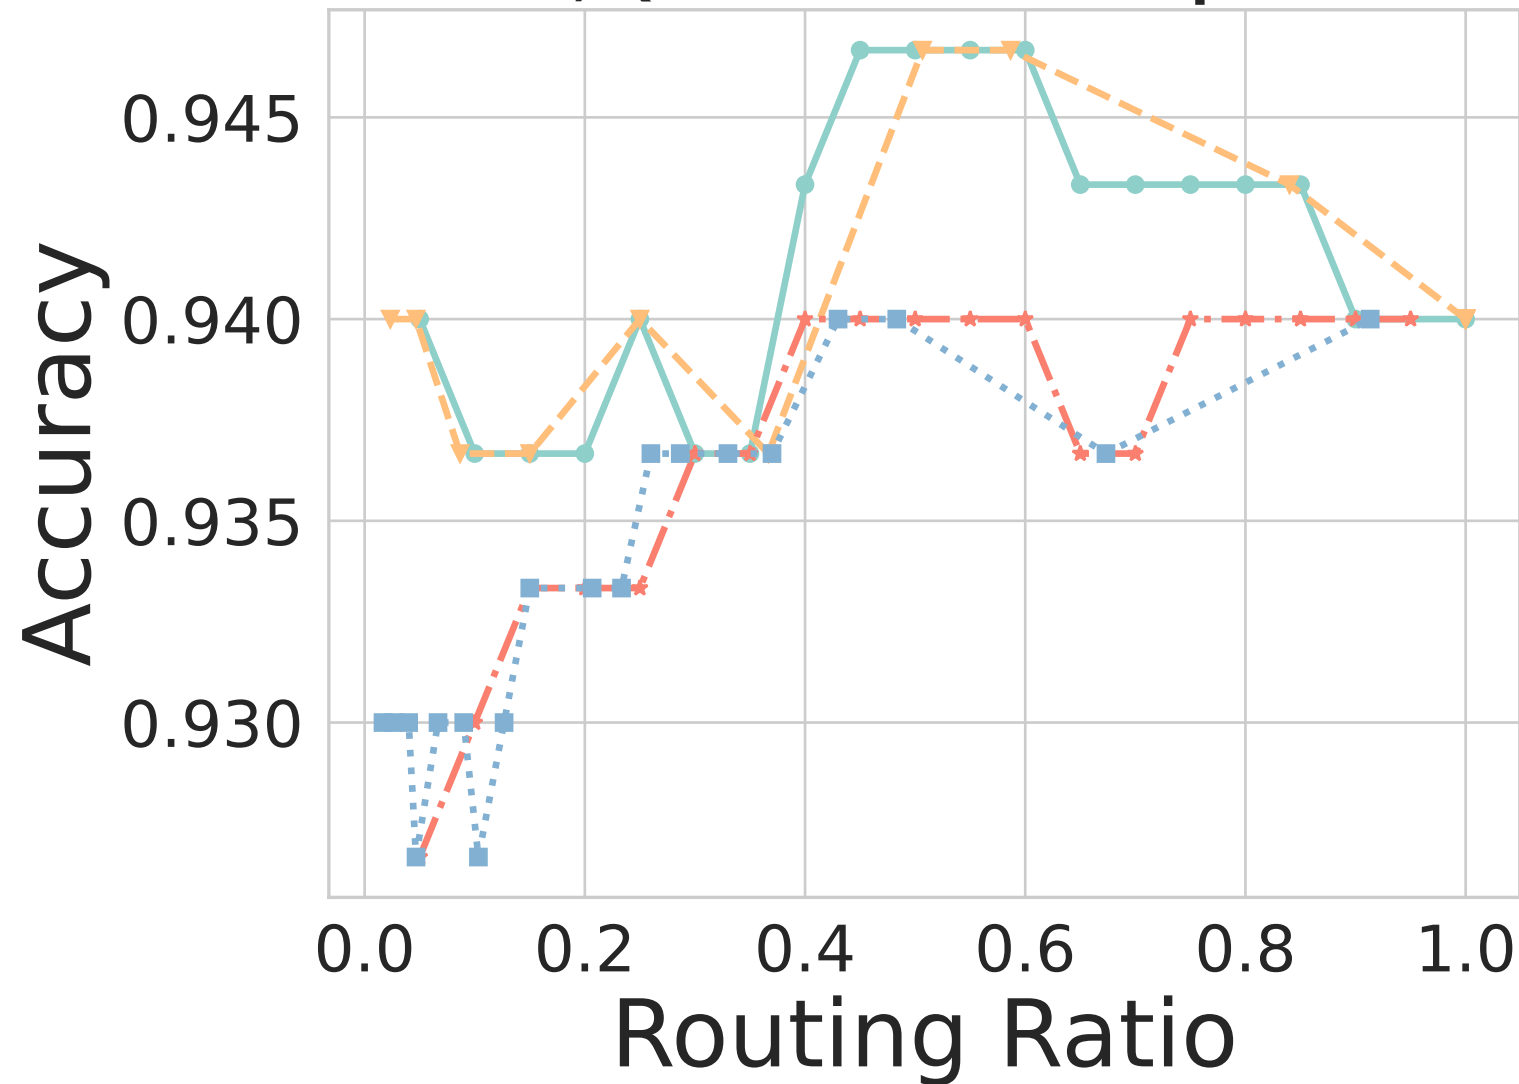

Supplement: supplementary_material [file cali_down_svamp_Qwen3-1.7B_deepseek-reasoner.pdf › Routing_SLM_LLMs/Proxy_routing_prediction/to_deepseek-reasoner/svamp_as_downstream/cali_down_svamp_Qwen3-1.7B_deepseek-reasoner.pdf]

**SVAMP, Qwen3-4B to DeepSeek-R1**

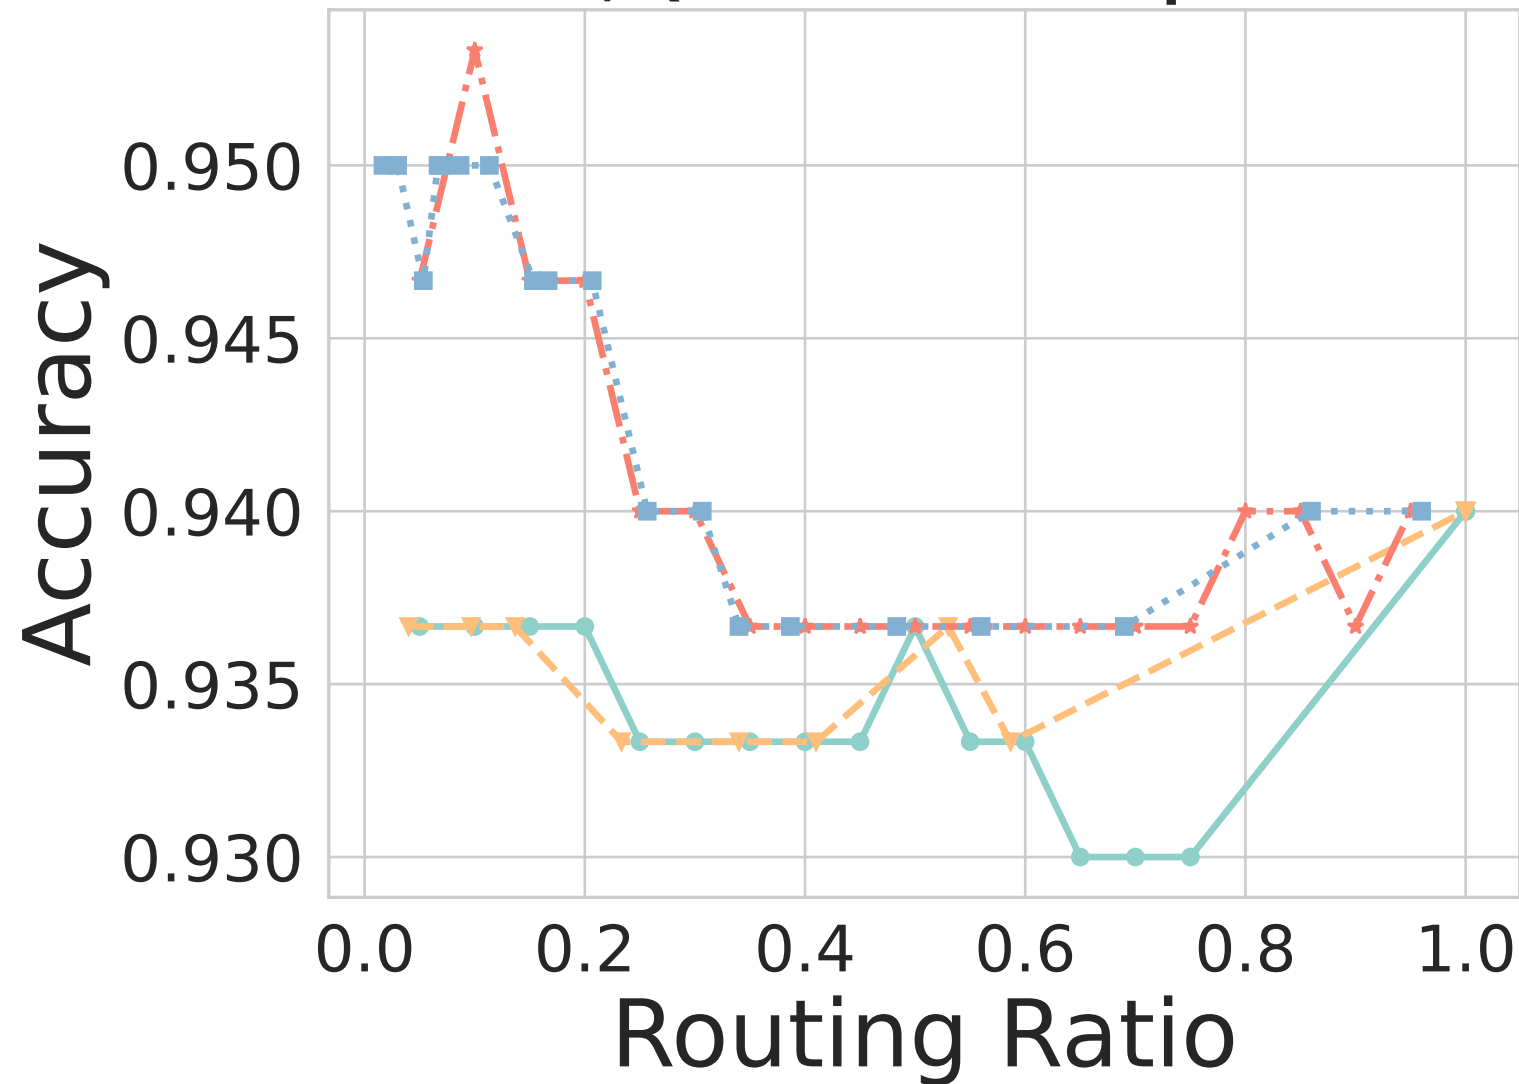

Supplement: supplementary_material [file cali_down_svamp_Qwen3-4B_deepseek-reasoner.pdf › Routing_SLM_LLMs/Proxy_routing_prediction/to_deepseek-reasoner/svamp_as_downstream/cali_down_svamp_Qwen3-4B_deepseek-reasoner.pdf]

**SVAMP, granite-3.1-8b to DeepSeek-R1**

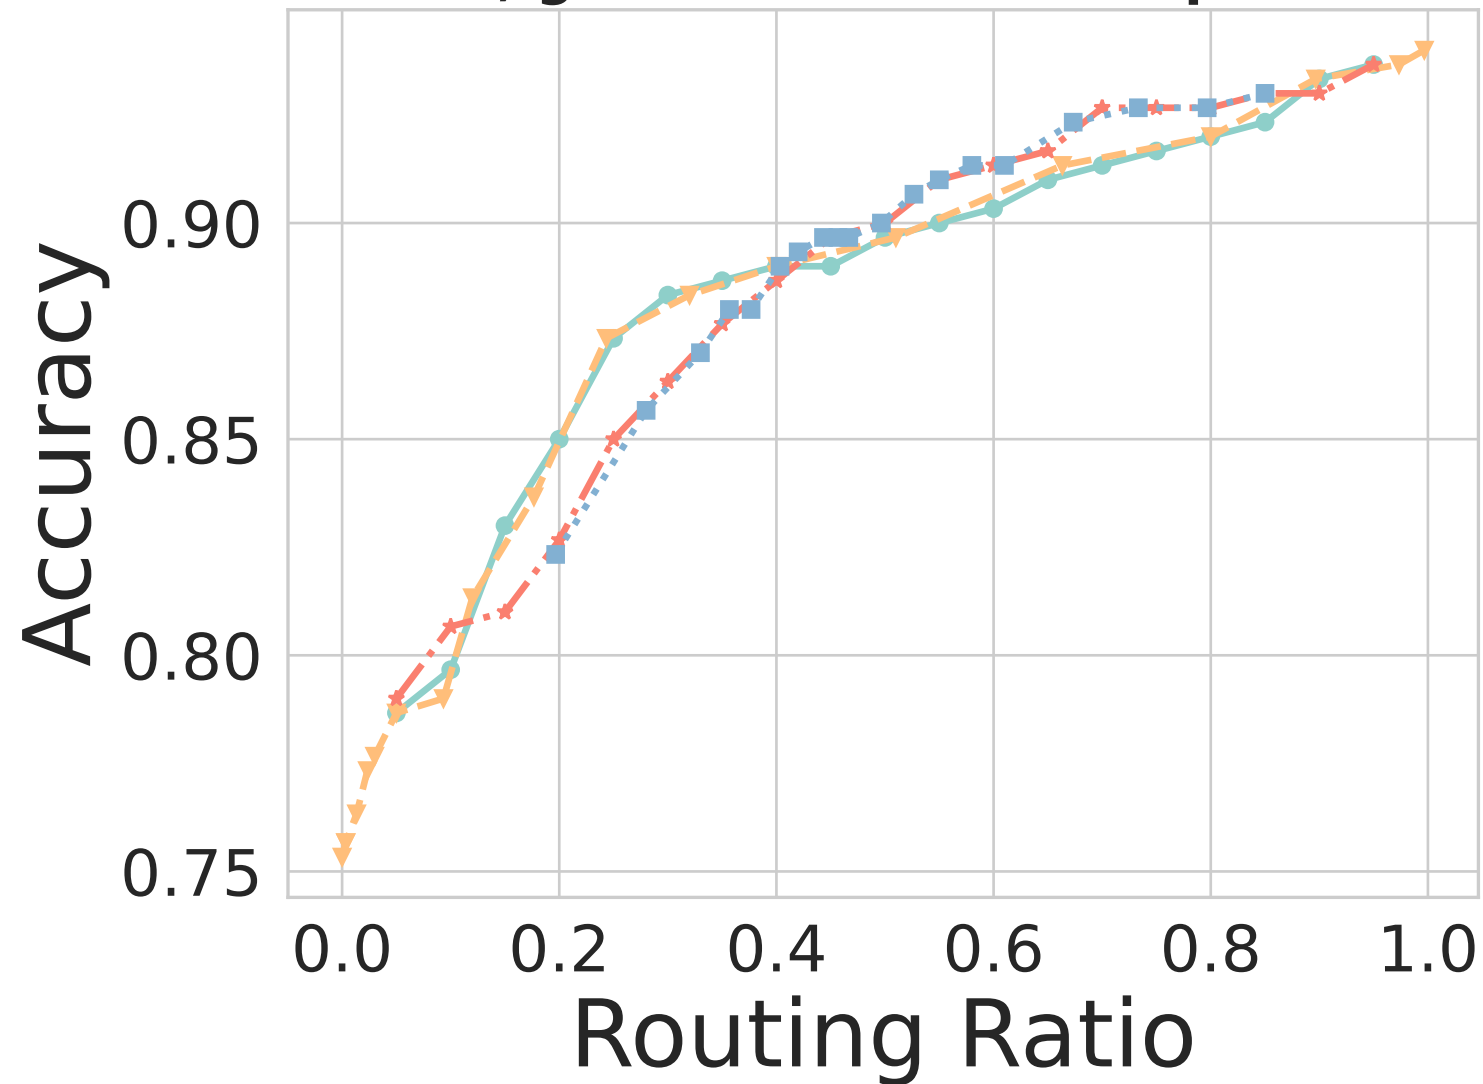

Supplement: supplementary_material [file cali_down_svamp_granite-3.1-8b_deepseek-reasoner.pdf › Routing_SLM_LLMs/Proxy_routing_prediction/to_deepseek-reasoner/svamp_as_downstream/cali_down_svamp_granite-3.1-8b_deepseek-reasoner.pdf]

**SVAMP, llama-3.1-8b to DeepSeek-R1**

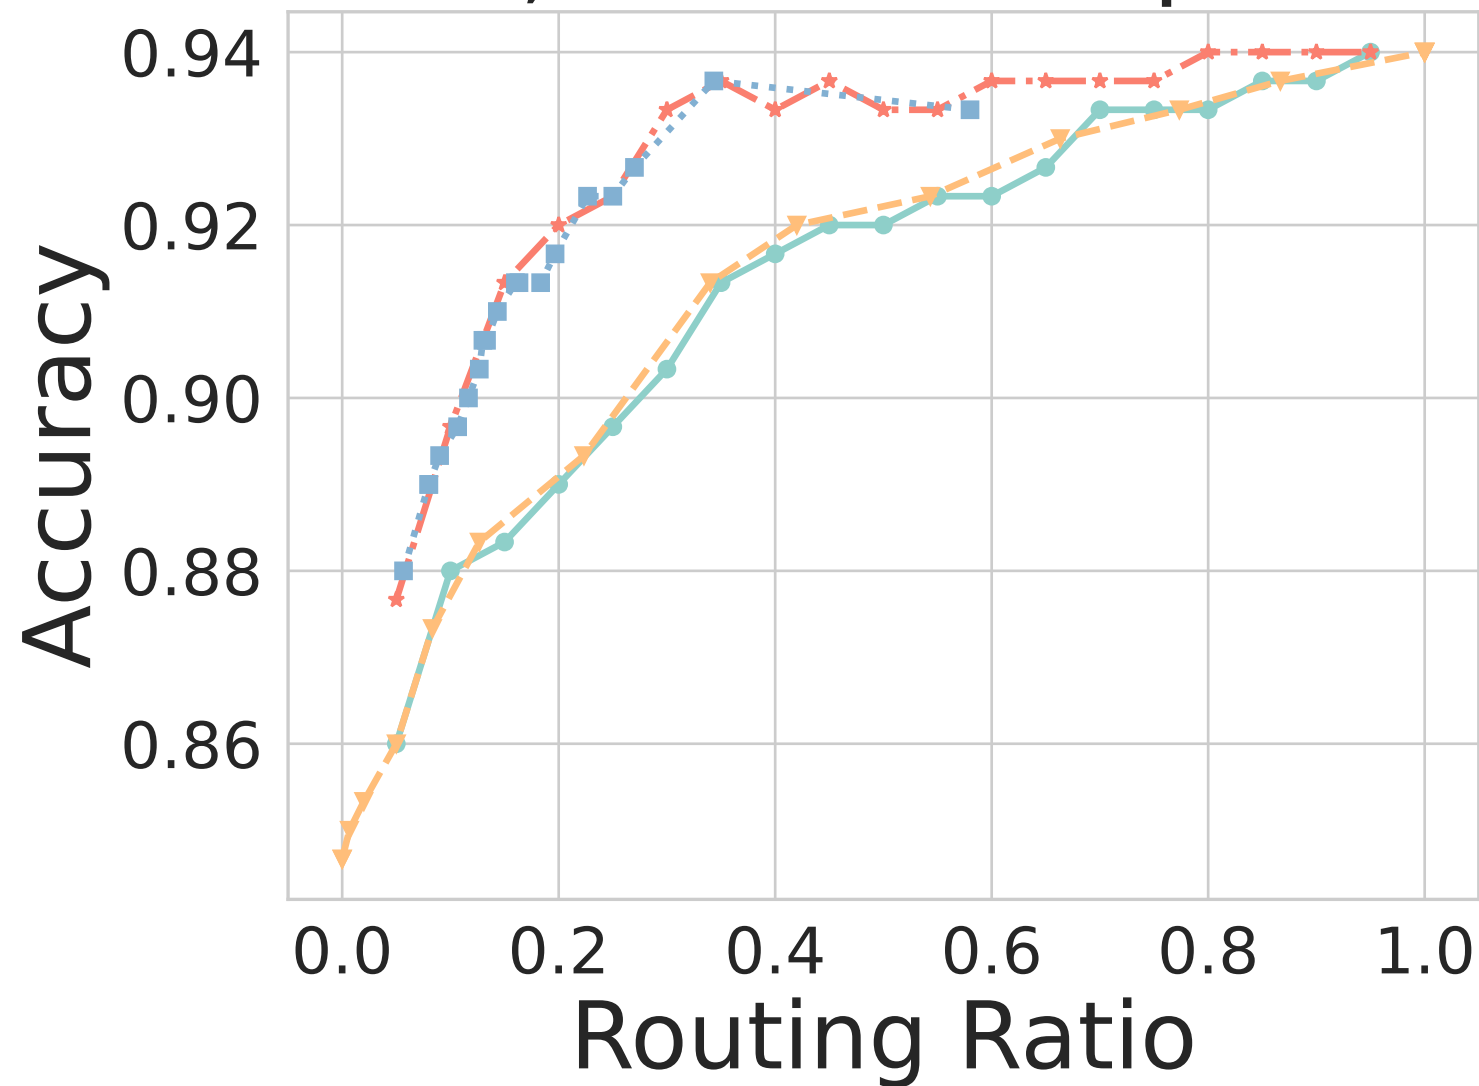

Supplement: supplementary_material [file cali_down_svamp_llama-3.1-8b_deepseek-reasoner.pdf › Routing_SLM_LLMs/Proxy_routing_prediction/to_deepseek-reasoner/svamp_as_downstream/cali_down_svamp_llama-3.1-8b_deepseek-reasoner.pdf]

**SVAMP, llama-3.2-1b to DeepSeek-R1**

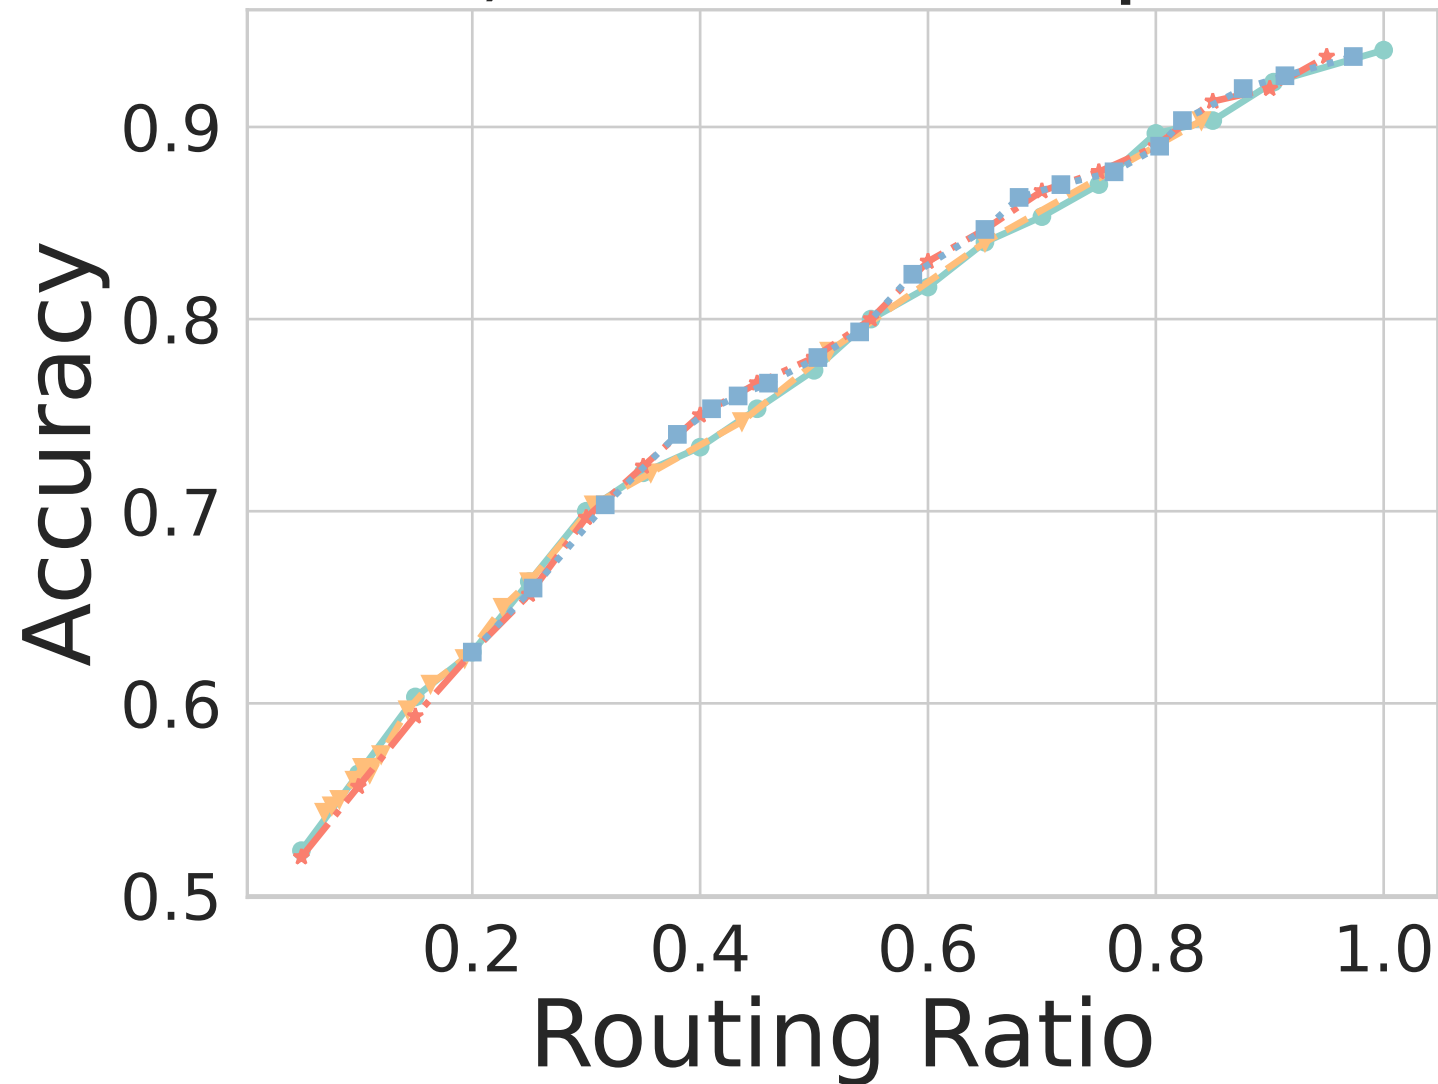

Supplement: supplementary_material [file cali_down_svamp_llama-3.2-1b_deepseek-reasoner.pdf › Routing_SLM_LLMs/Proxy_routing_prediction/to_deepseek-reasoner/svamp_as_downstream/cali_down_svamp_llama-3.2-1b_deepseek-reasoner.pdf]

**SVAMP, llama-3.2-3b to DeepSeek-R1**

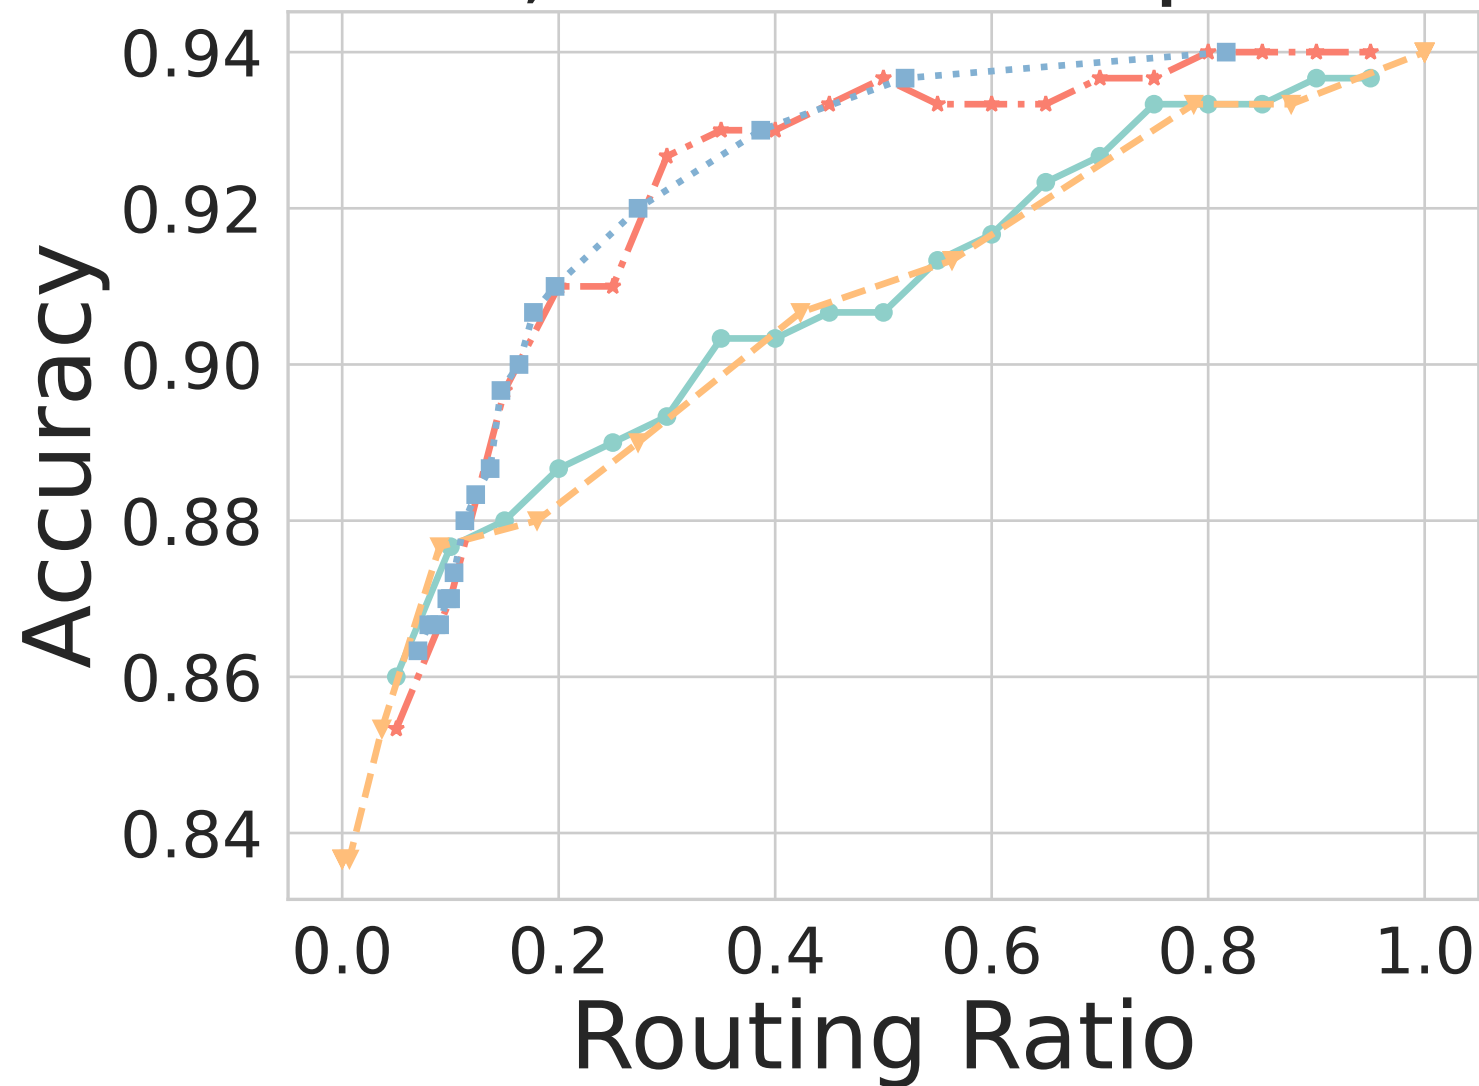

Supplement: supplementary_material [file cali_down_svamp_llama-3.2-3b_deepseek-reasoner.pdf › Routing_SLM_LLMs/Proxy_routing_prediction/to_deepseek-reasoner/svamp_as_downstream/cali_down_svamp_llama-3.2-3b_deepseek-reasoner.pdf]

**SVAMP, mistral-7b to DeepSeek-R1**

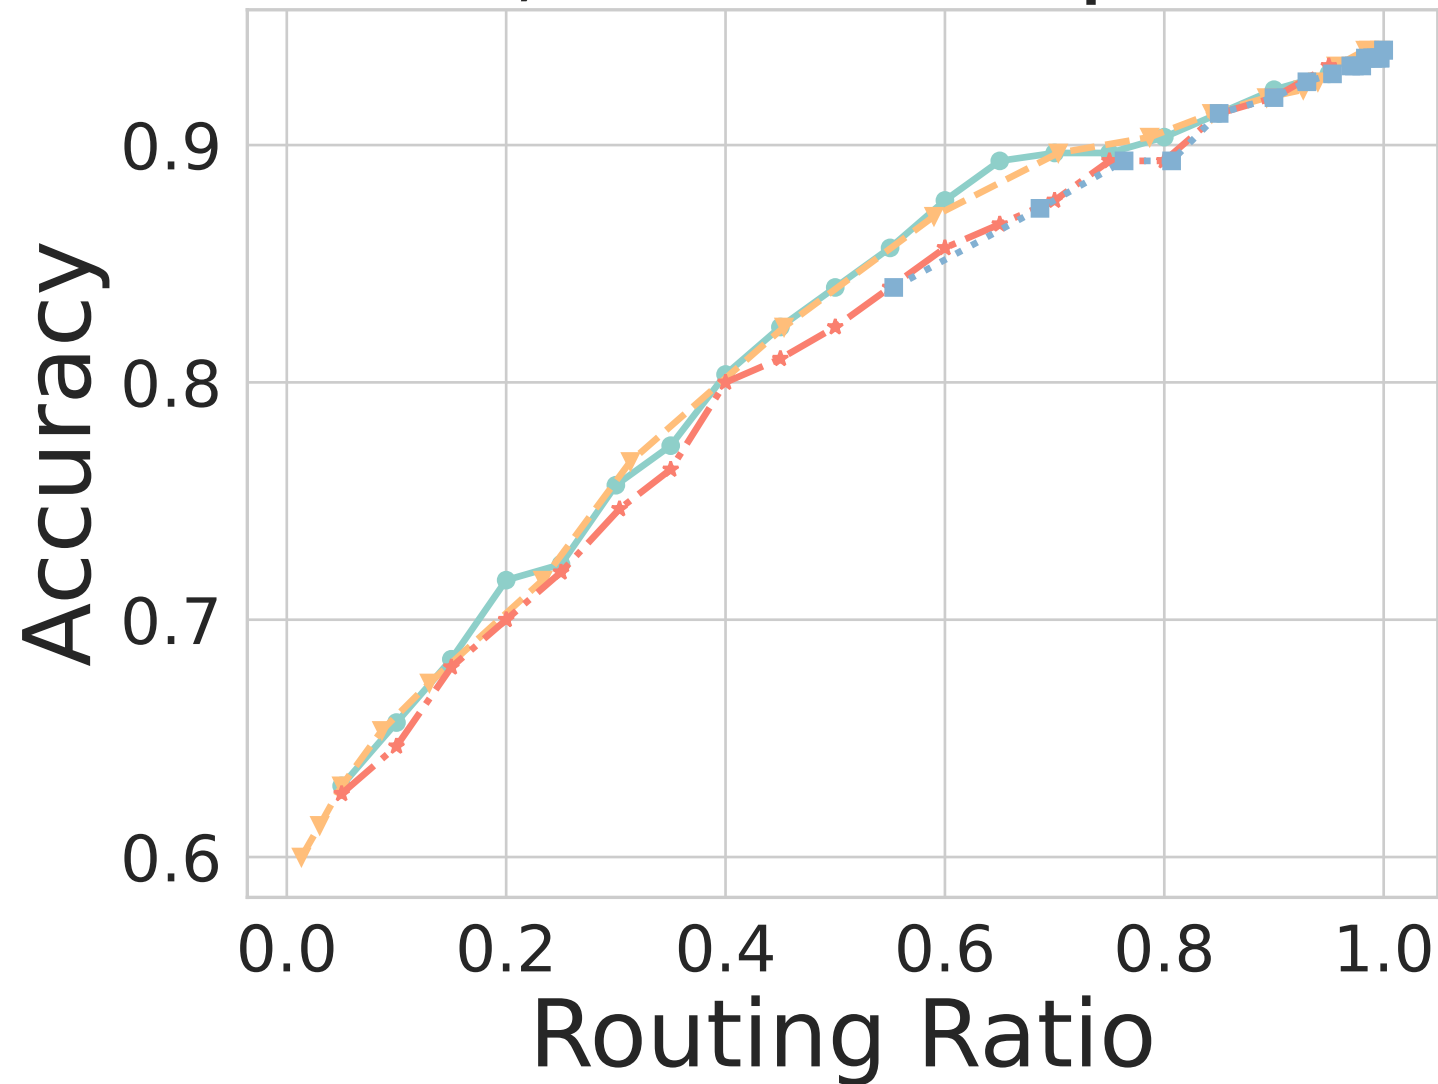

Supplement: supplementary_material [file cali_down_svamp_mistral-7b_deepseek-reasoner.pdf › Routing_SLM_LLMs/Proxy_routing_prediction/to_deepseek-reasoner/svamp_as_downstream/cali_down_svamp_mistral-7b_deepseek-reasoner.pdf]

**SVAMP, phi-3.5-mini to DeepSeek-R1**

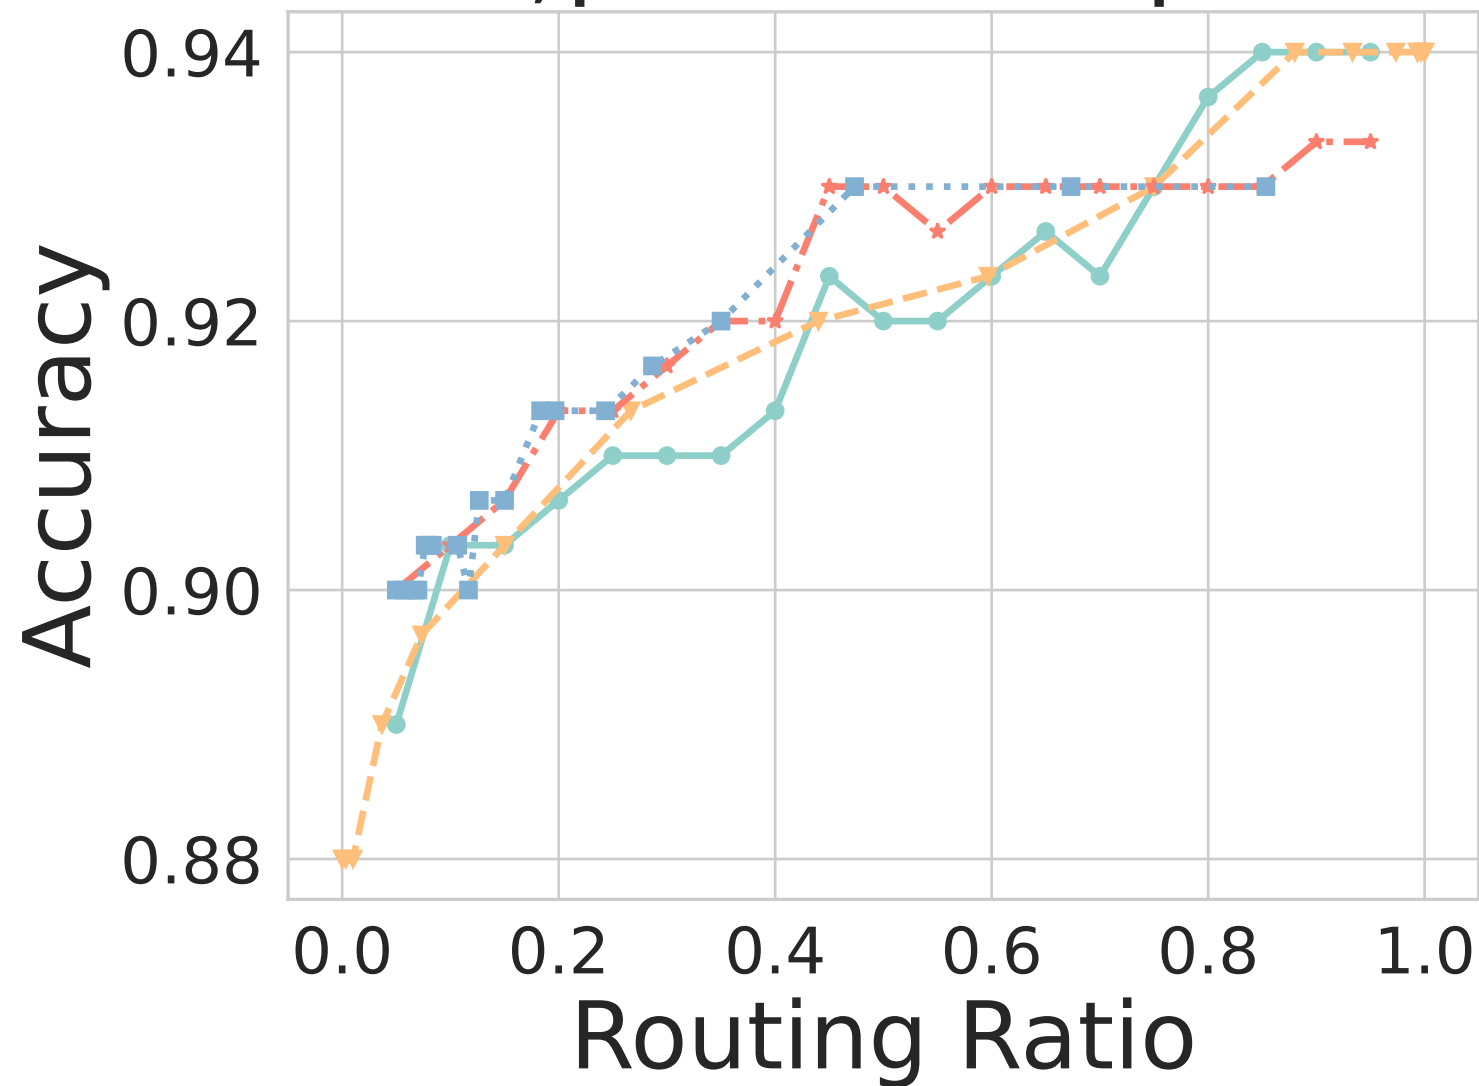

Supplement: supplementary_material [file cali_down_svamp_phi-3.5-mini_deepseek-reasoner.pdf › Routing_SLM_LLMs/Proxy_routing_prediction/to_deepseek-reasoner/svamp_as_downstream/cali_down_svamp_phi-3.5-mini_deepseek-reasoner.pdf]

**SVAMP, phi-4-mini-reasoning to DeepSeek-R1**

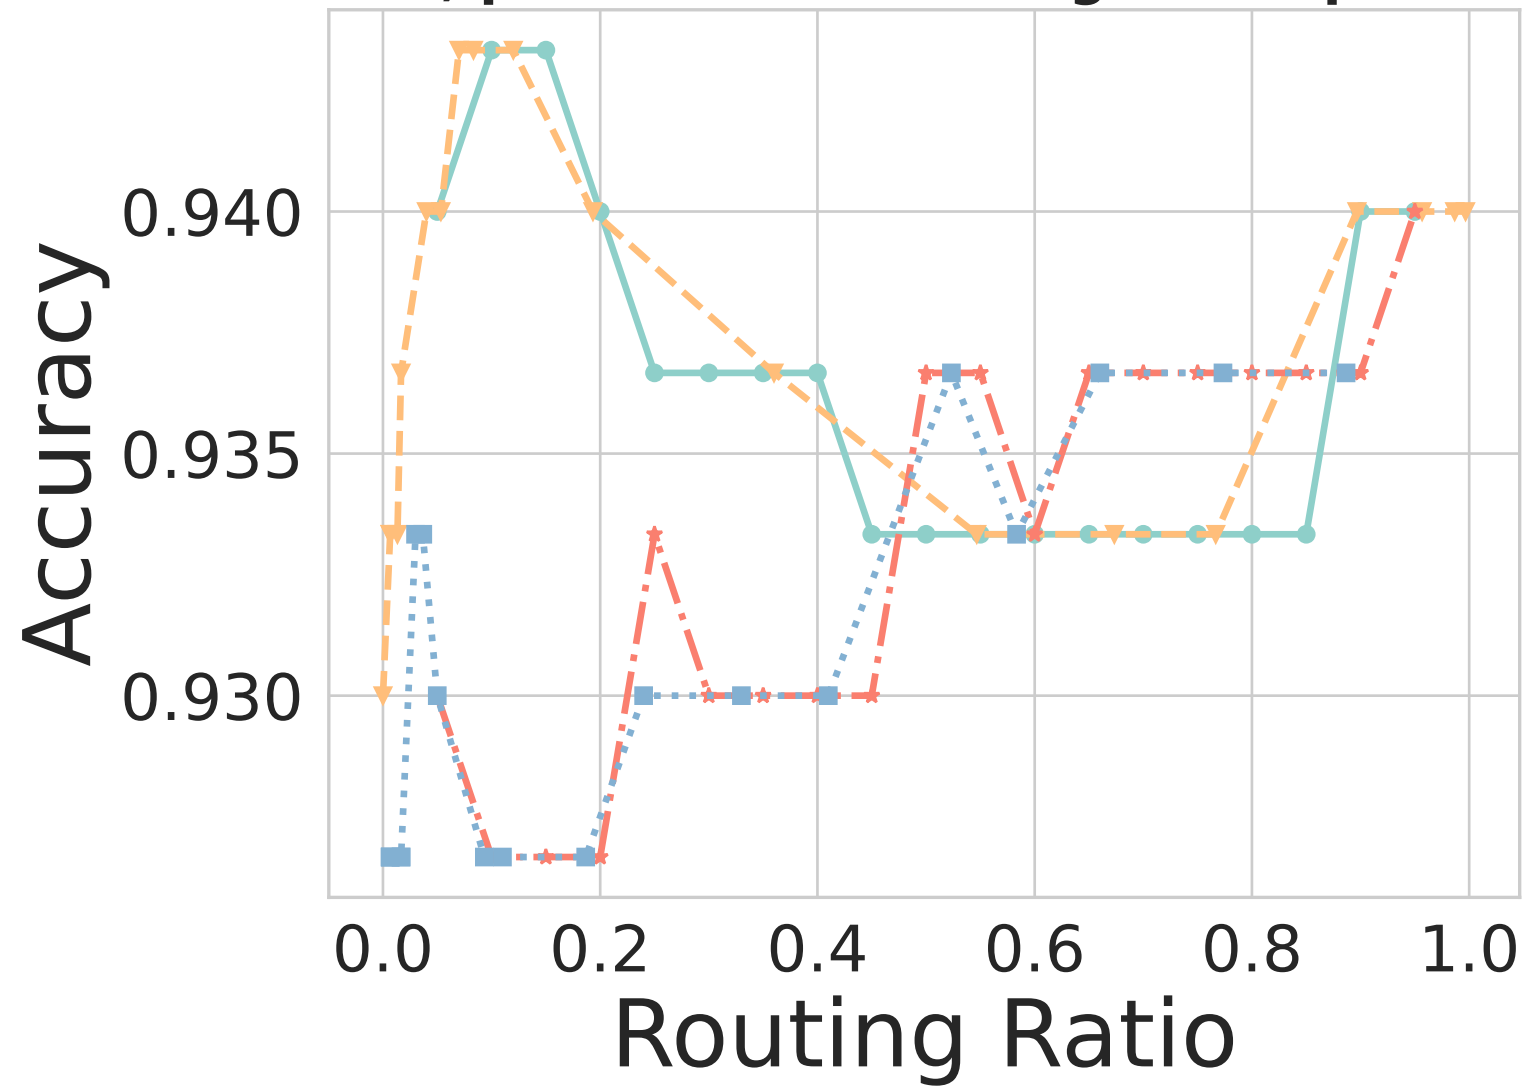

Supplement: supplementary_material [file cali_down_svamp_phi-4-mini-reasoning_deepseek-reasoner.pdf › Routing_SLM_LLMs/Proxy_routing_prediction/to_deepseek-reasoner/svamp_as_downstream/cali_down_svamp_phi-4-mini-reasoning_deepseek-reasoner.pdf]

**SVAMP, qwen-2.5-7b to DeepSeek-R1**

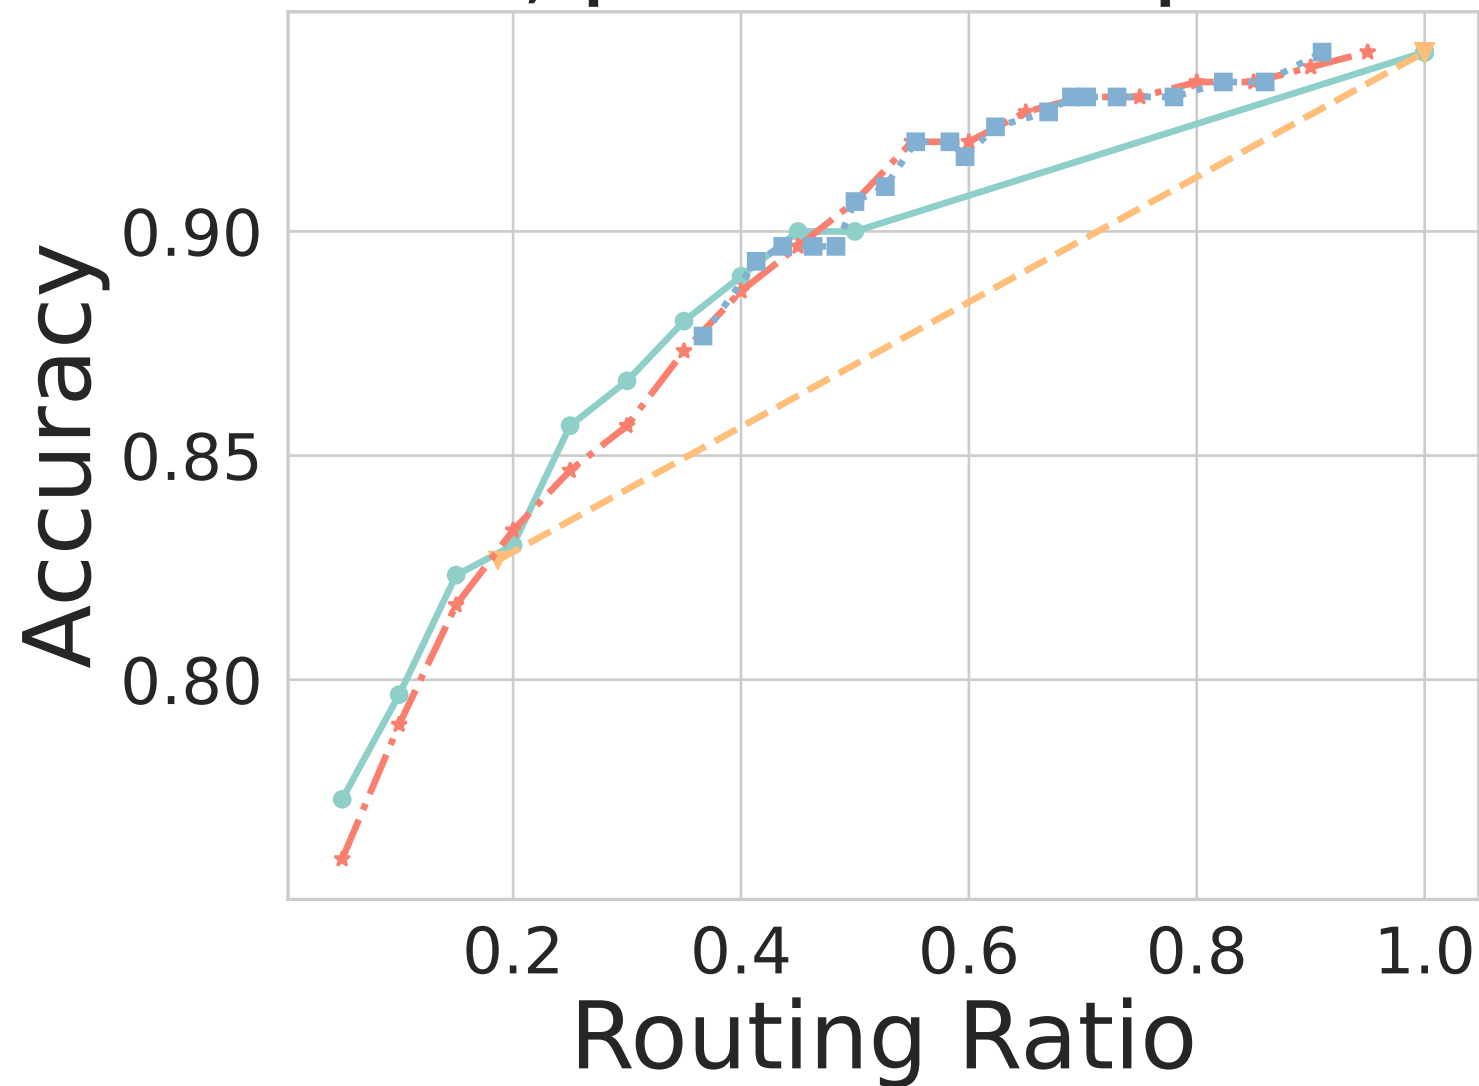

Supplement: supplementary_material [file cali_down_svamp_qwen-2.5-7b_deepseek-reasoner.pdf › Routing_SLM_LLMs/Proxy_routing_prediction/to_deepseek-reasoner/svamp_as_downstream/cali_down_svamp_qwen-2.5-7b_deepseek-reasoner.pdf]

**SVAMP, rwkv to DeepSeek-R1**

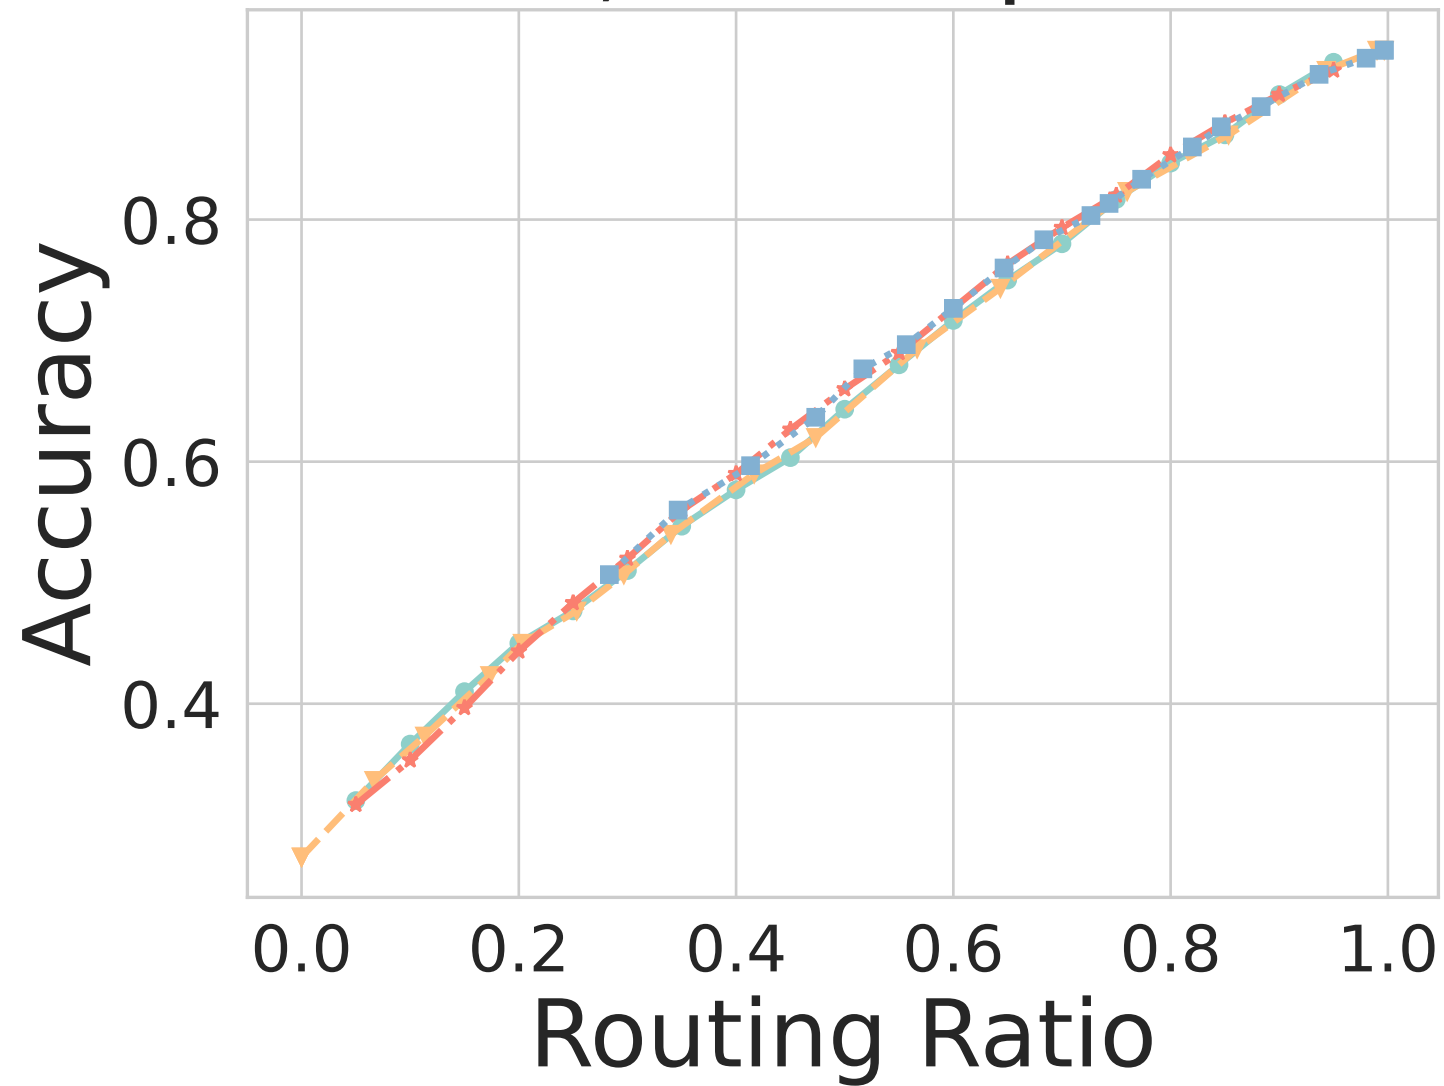

Supplement: supplementary_material [file cali_down_svamp_rwkv_deepseek-reasoner.pdf › Routing_SLM_LLMs/Proxy_routing_prediction/to_deepseek-reasoner/svamp_as_downstream/cali_down_svamp_rwkv_deepseek-reasoner.pdf]

# TruthfulQA, Qwen3-0.6B to DeepSeek-R1

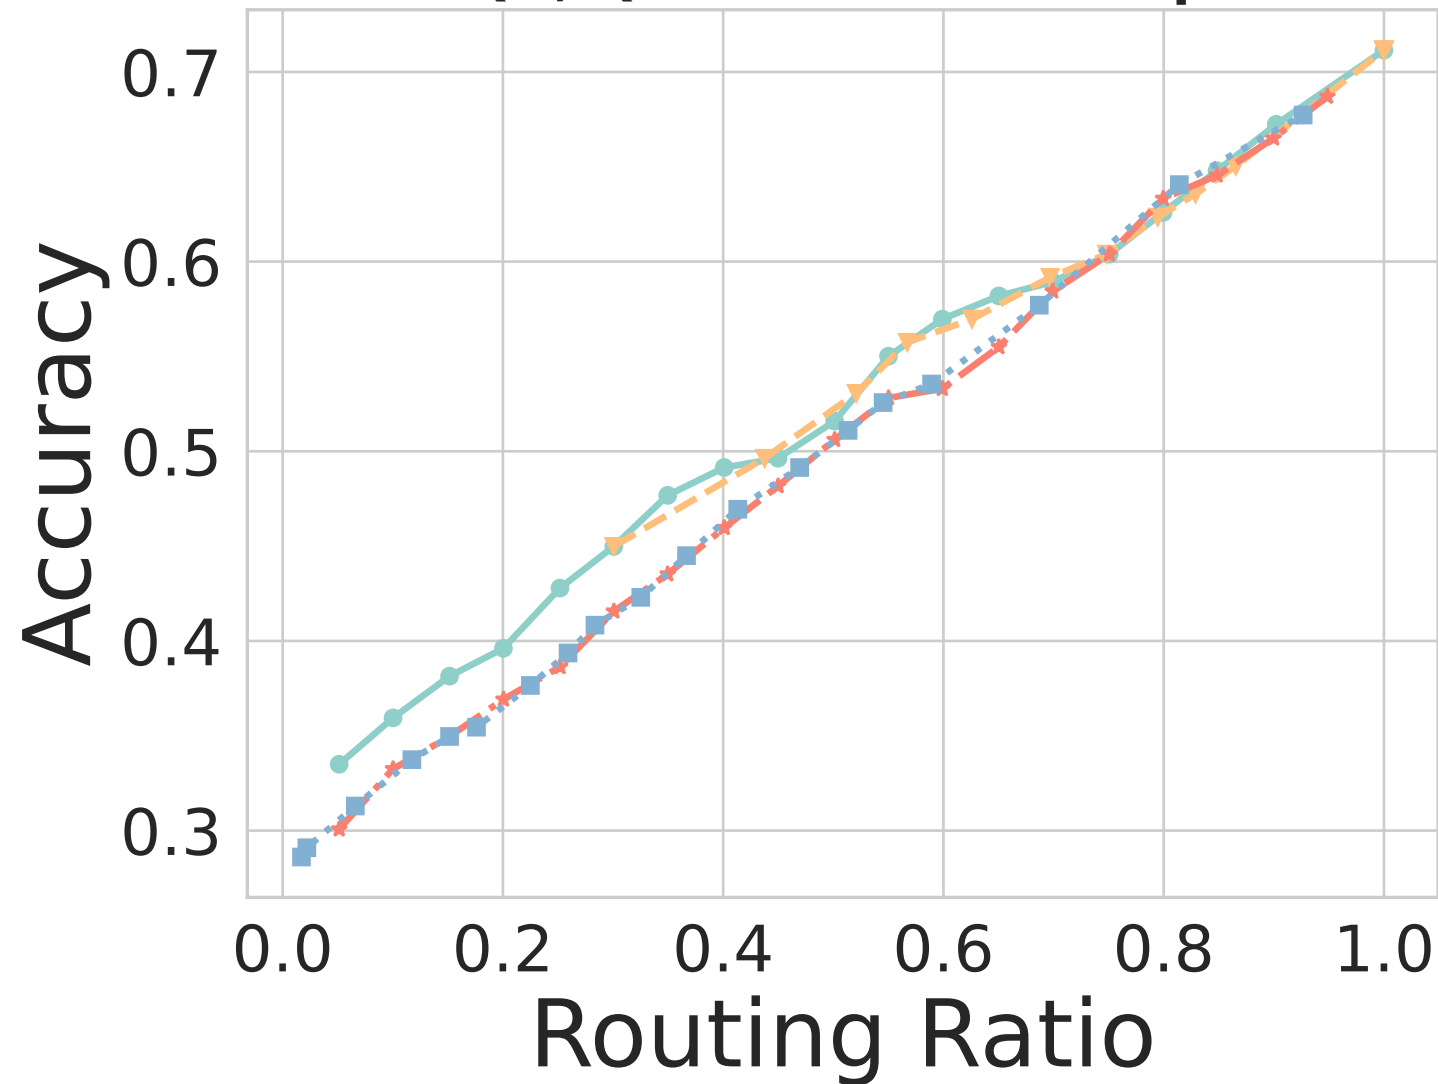

Supplement: supplementary_material [file cali_down_truthful_qa_Qwen3-0.6B_deepseek-reasoner.pdf › Routing_SLM_LLMs/Proxy_routing_prediction/to_deepseek-reasoner/truthful_qa_as_downstream/cali_down_truthful_qa_Qwen3-0.6B_deepseek-reasoner.pdf]

**TruthfulQA, Qwen3-1.7B to DeepSeek-R1**

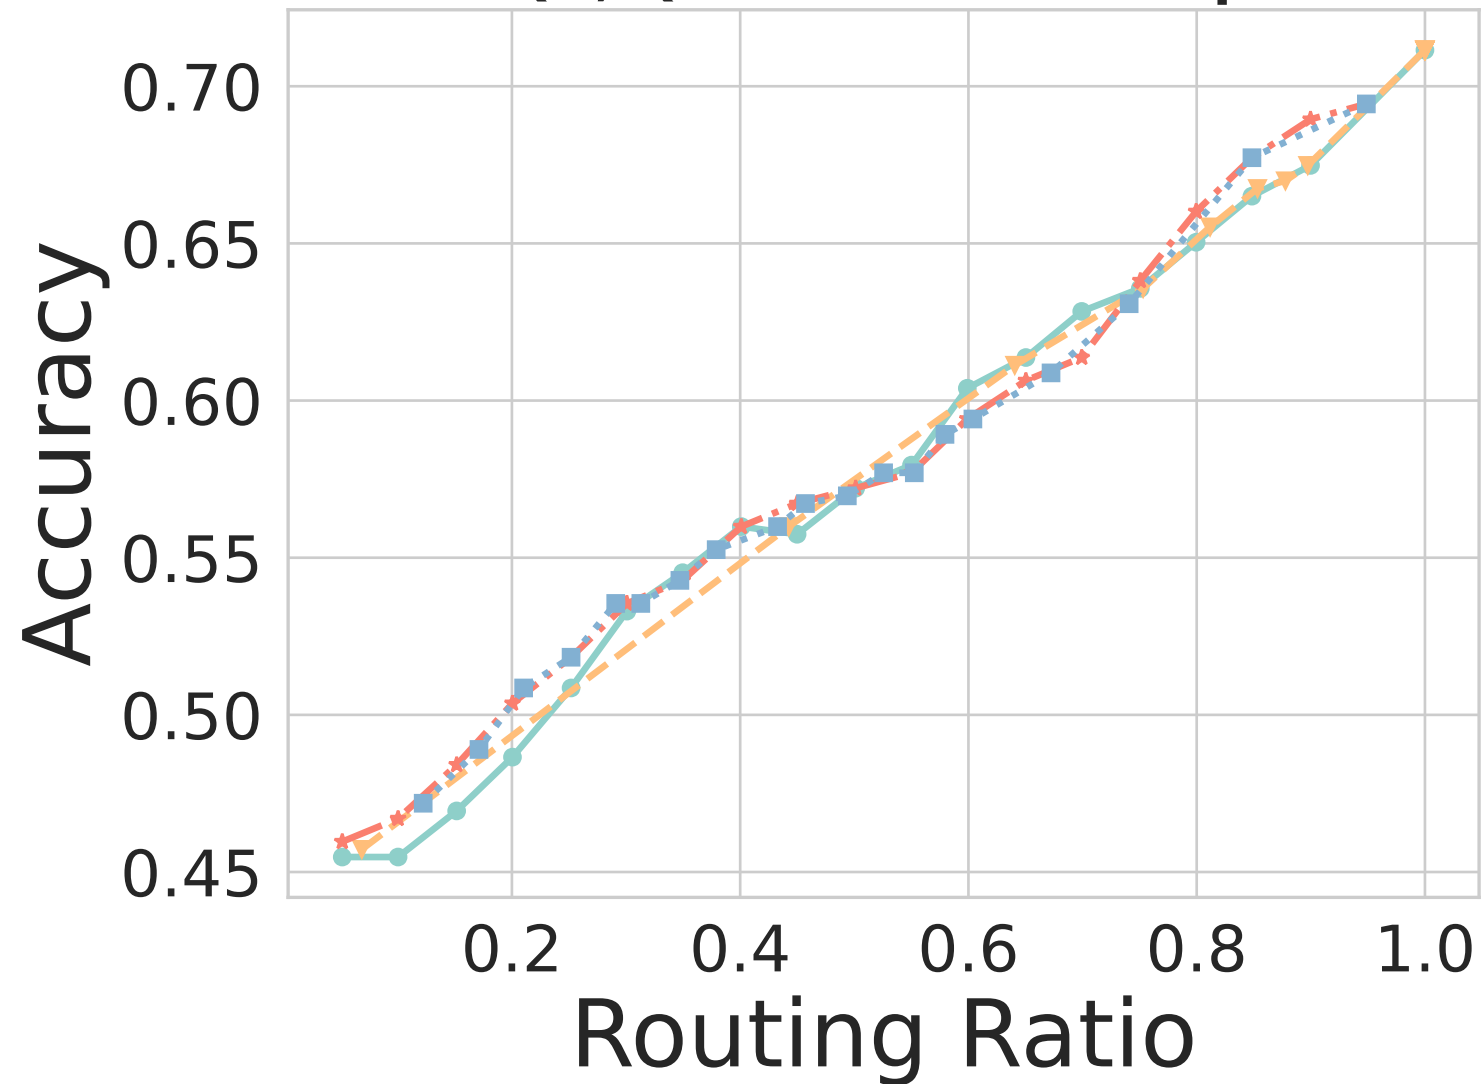

Supplement: supplementary_material [file cali_down_truthful_qa_Qwen3-1.7B_deepseek-reasoner.pdf › Routing_SLM_LLMs/Proxy_routing_prediction/to_deepseek-reasoner/truthful_qa_as_downstream/cali_down_truthful_qa_Qwen3-1.7B_deepseek-reasoner.pdf]

**TruthfulQA, Qwen3-4B to DeepSeek-R1**

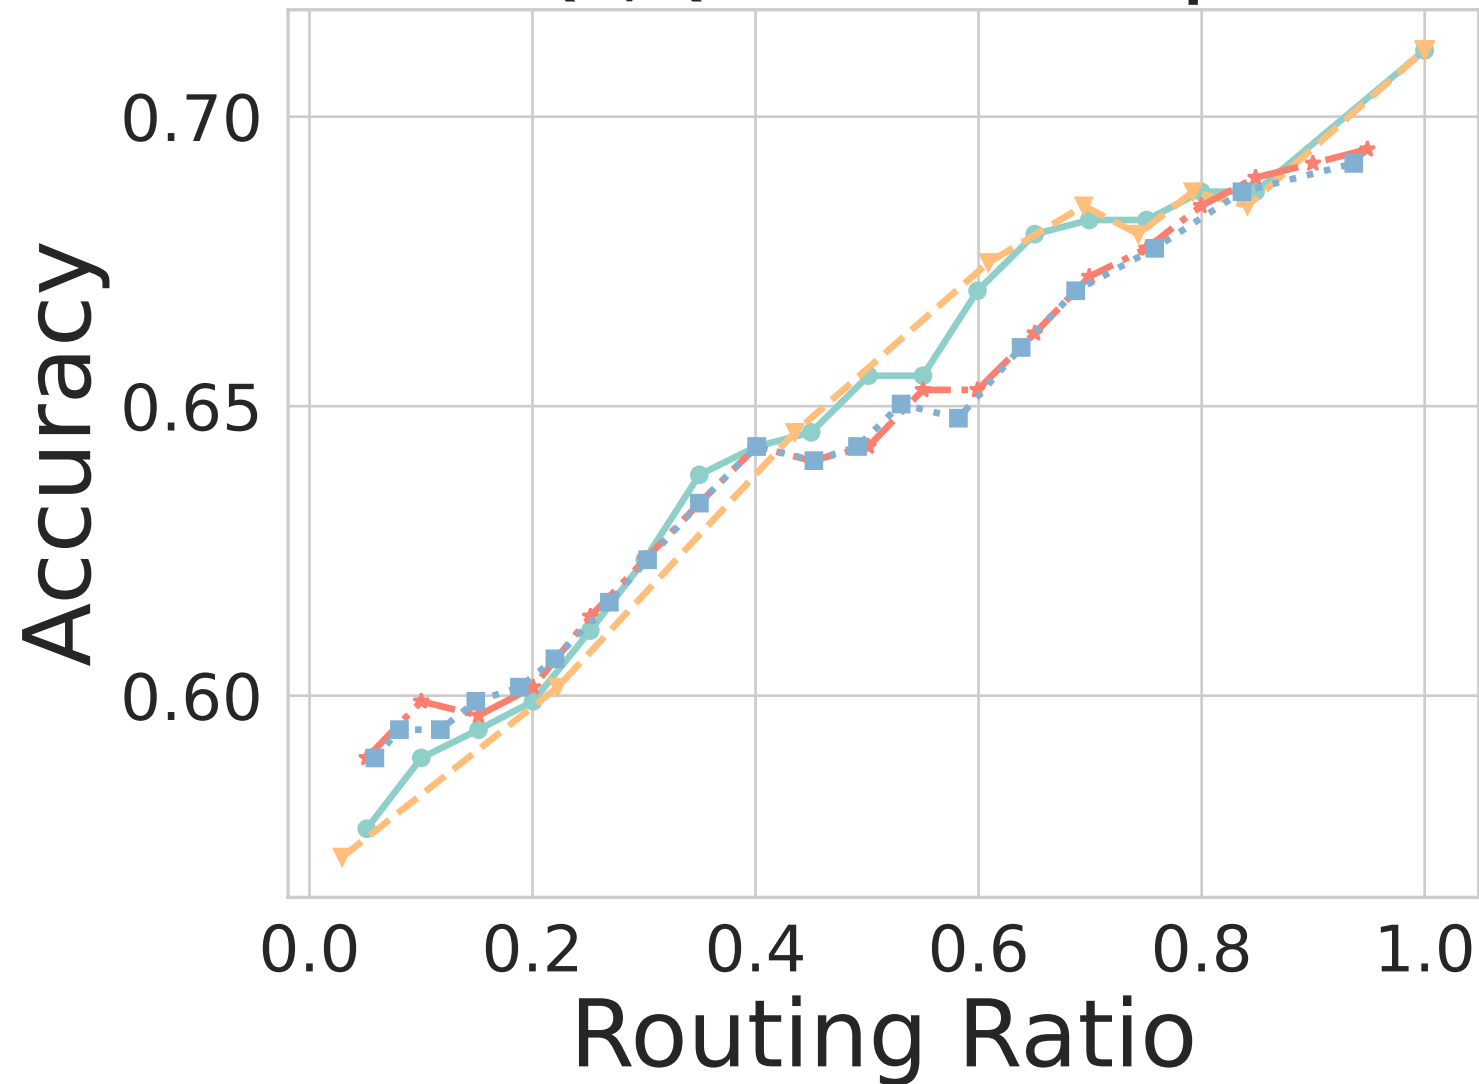

Supplement: supplementary_material [file cali_down_truthful_qa_Qwen3-4B_deepseek-reasoner.pdf › Routing_SLM_LLMs/Proxy_routing_prediction/to_deepseek-reasoner/truthful_qa_as_downstream/cali_down_truthful_qa_Qwen3-4B_deepseek-reasoner.pdf]

**TruthfulQA, granite-3.1-8b to DeepSeek-R1**

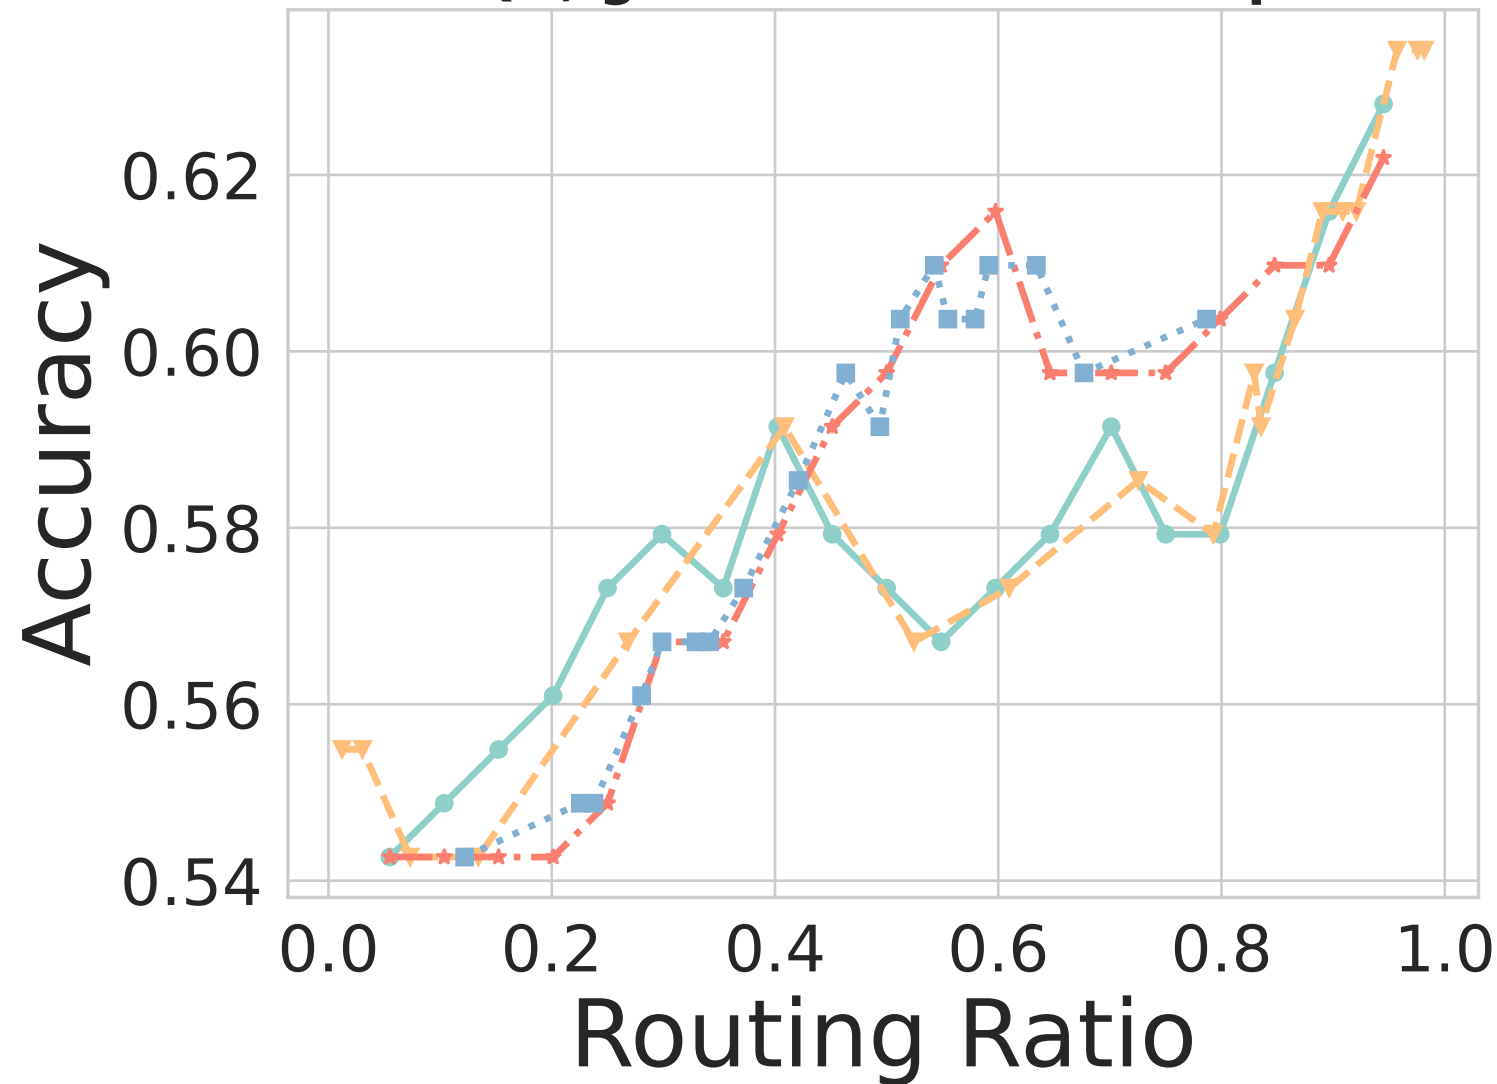

Supplement: supplementary_material [file cali_down_truthful_qa_granite-3.1-8b_deepseek-reasoner.pdf › Routing_SLM_LLMs/Proxy_routing_prediction/to_deepseek-reasoner/truthful_qa_as_downstream/cali_down_truthful_qa_granite-3.1-8b_deepseek-reasoner.pdf]

**TruthfulQA, llama-3.1-8b to DeepSeek-R1**

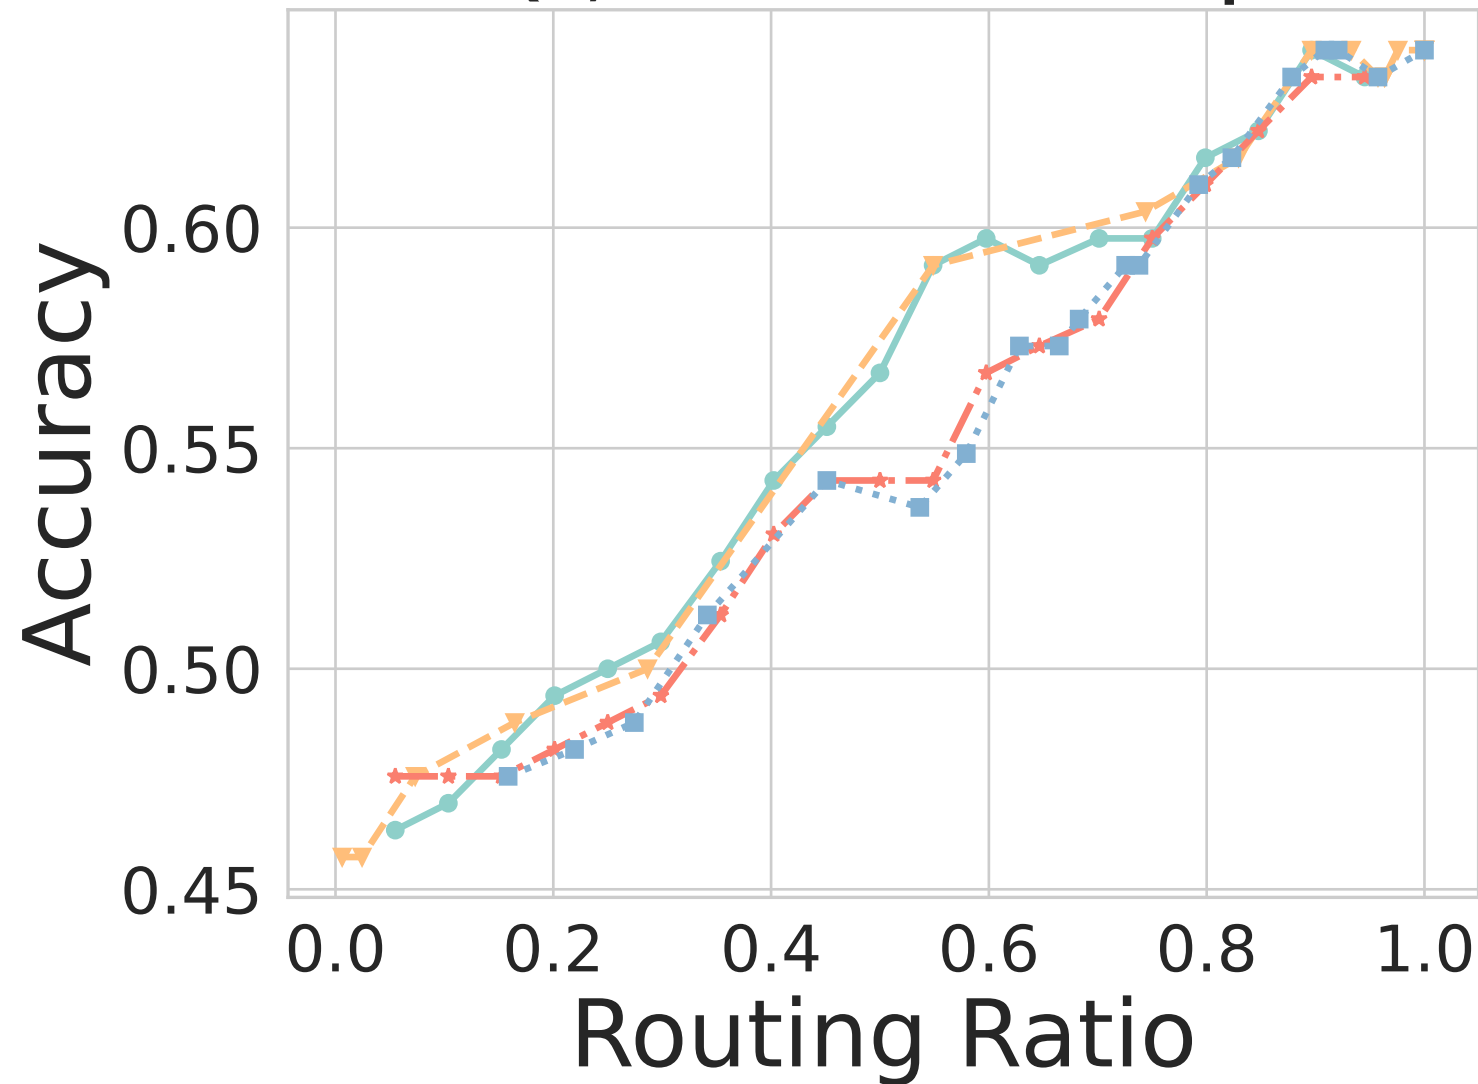

Supplement: supplementary_material [file cali_down_truthful_qa_llama-3.1-8b_deepseek-reasoner.pdf › Routing_SLM_LLMs/Proxy_routing_prediction/to_deepseek-reasoner/truthful_qa_as_downstream/cali_down_truthful_qa_llama-3.1-8b_deepseek-reasoner.pdf]

**TruthfulQA, llama-3.2-1b to DeepSeek-R1**

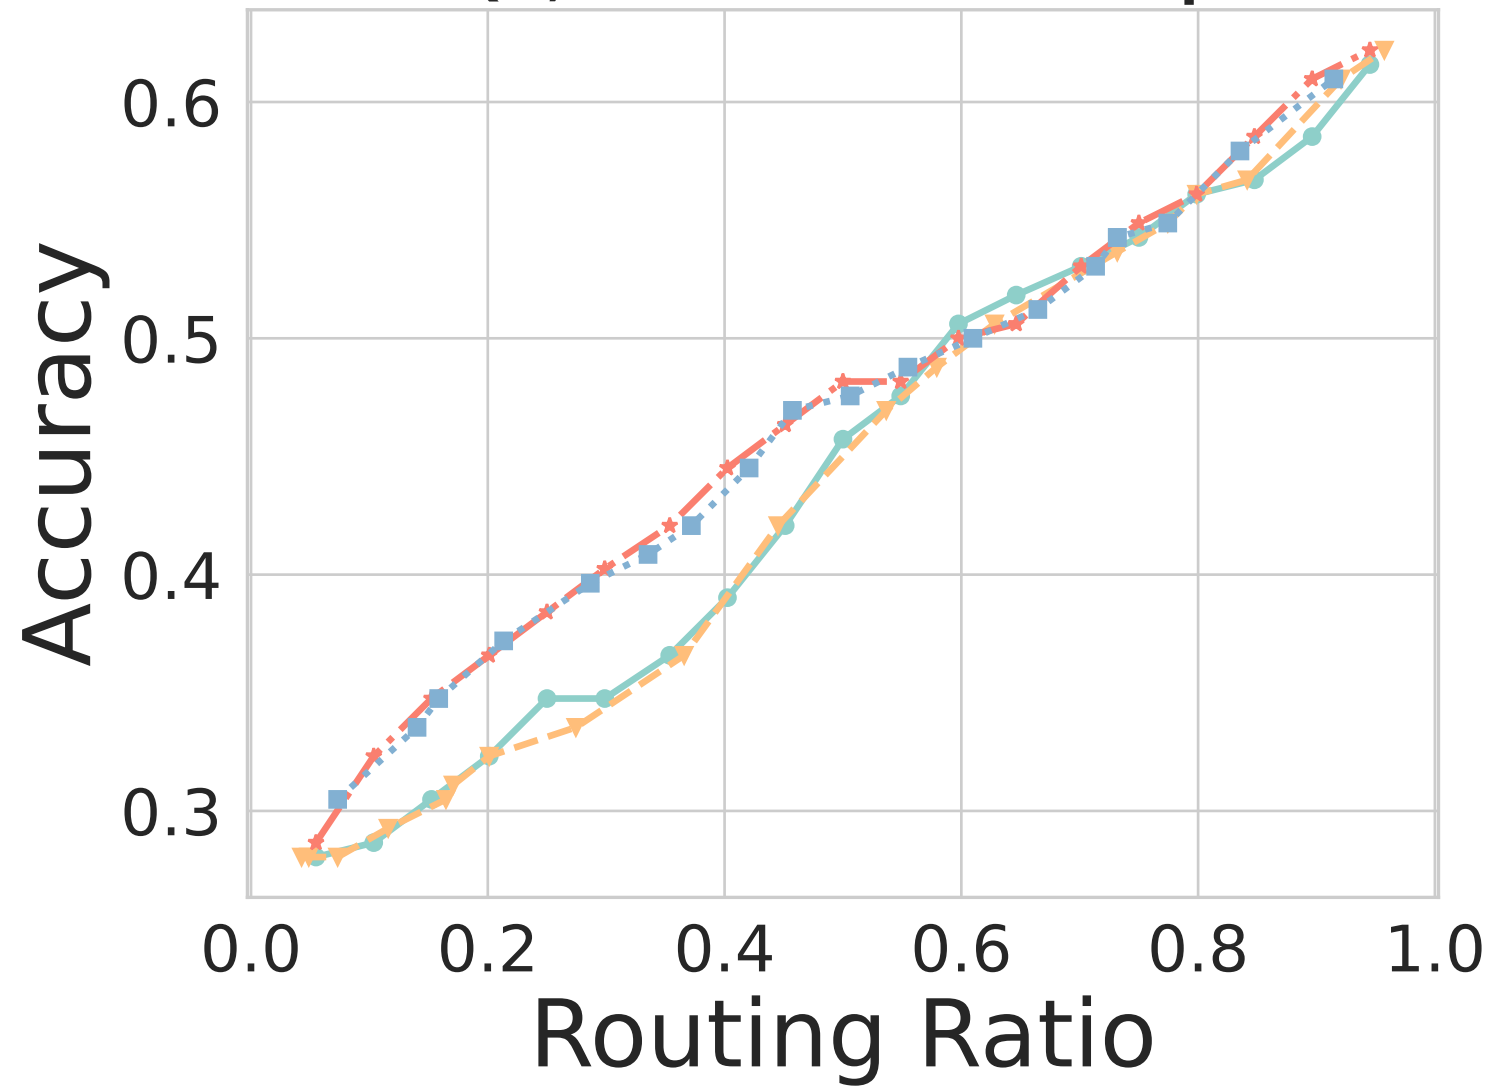

Supplement: supplementary_material [file cali_down_truthful_qa_llama-3.2-1b_deepseek-reasoner.pdf › Routing_SLM_LLMs/Proxy_routing_prediction/to_deepseek-reasoner/truthful_qa_as_downstream/cali_down_truthful_qa_llama-3.2-1b_deepseek-reasoner.pdf]

# TruthfulQA, llama-3.2-3b to DeepSeek-R1

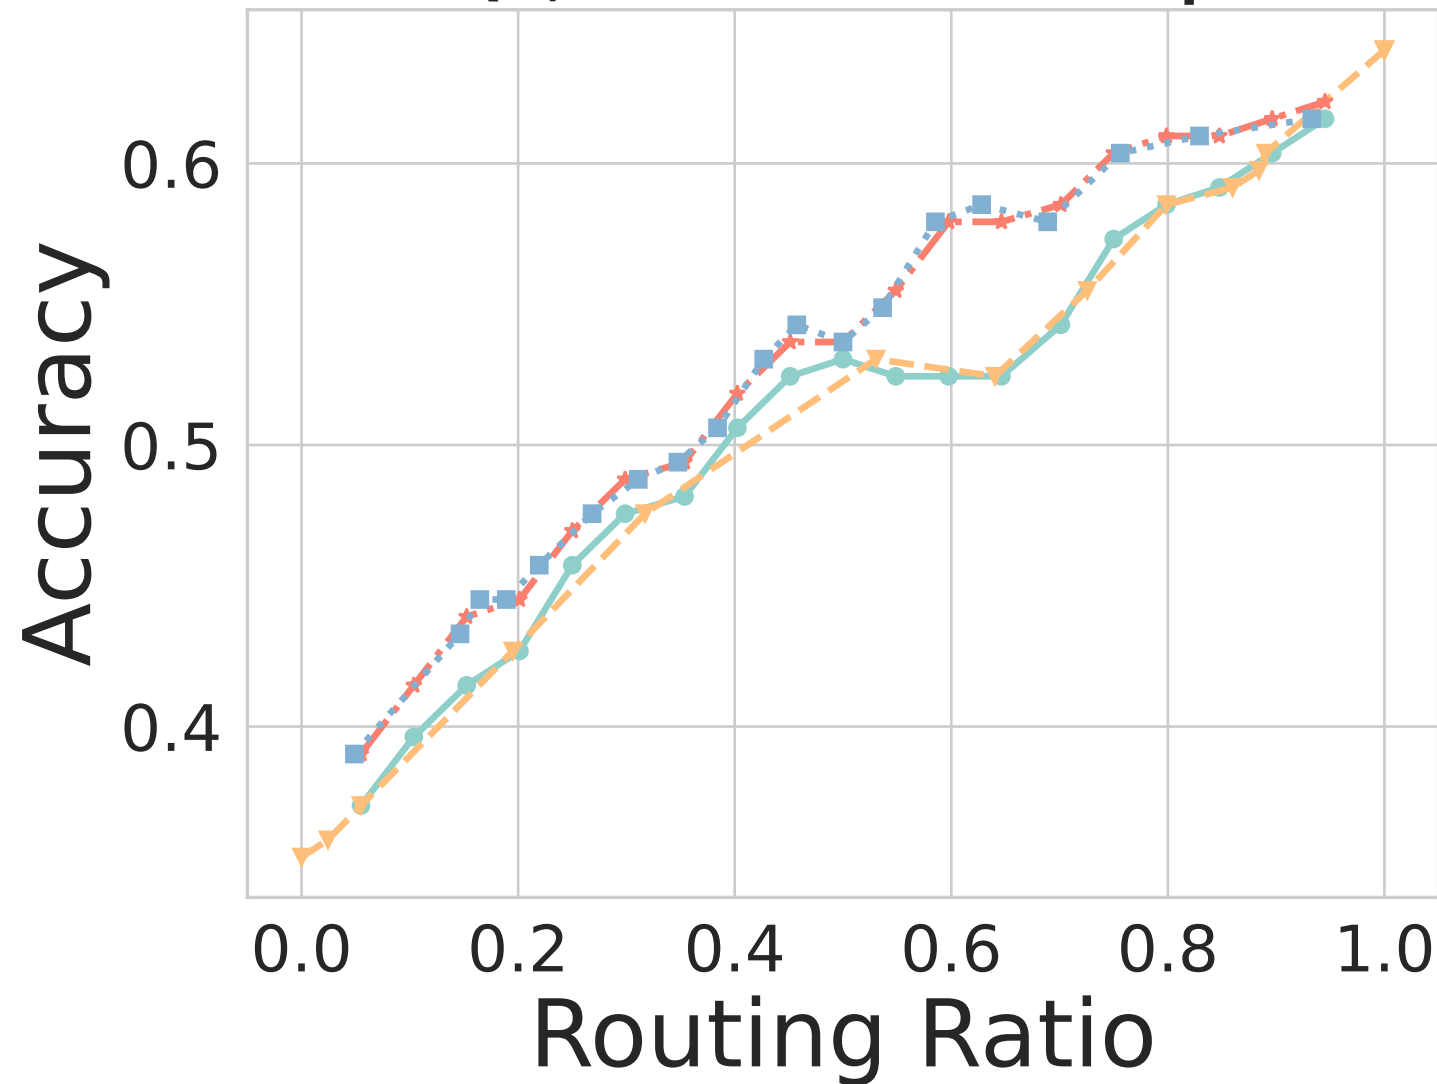

Supplement: supplementary_material [file cali_down_truthful_qa_llama-3.2-3b_deepseek-reasoner.pdf › Routing_SLM_LLMs/Proxy_routing_prediction/to_deepseek-reasoner/truthful_qa_as_downstream/cali_down_truthful_qa_llama-3.2-3b_deepseek-reasoner.pdf]

**TruthfulQA, mistral-7b to DeepSeek-R1**

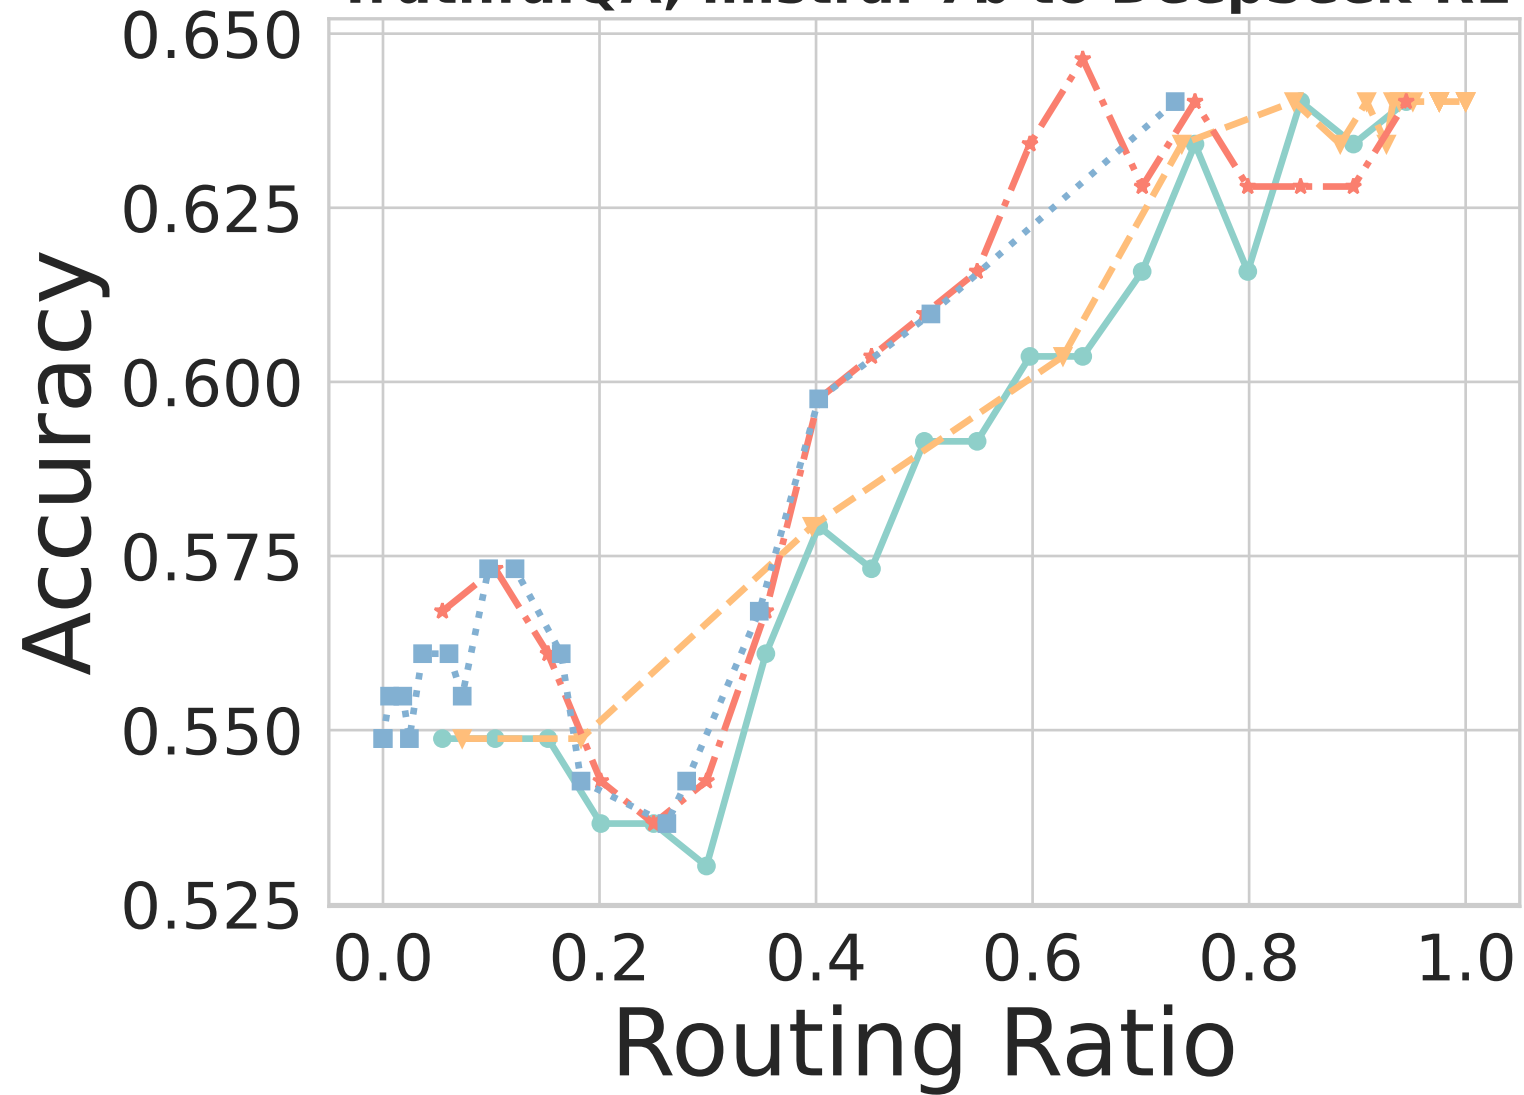

Supplement: supplementary_material [file cali_down_truthful_qa_mistral-7b_deepseek-reasoner.pdf › Routing_SLM_LLMs/Proxy_routing_prediction/to_deepseek-reasoner/truthful_qa_as_downstream/cali_down_truthful_qa_mistral-7b_deepseek-reasoner.pdf]

**TruthfulQA, phi-3.5-mini to DeepSeek-R1**

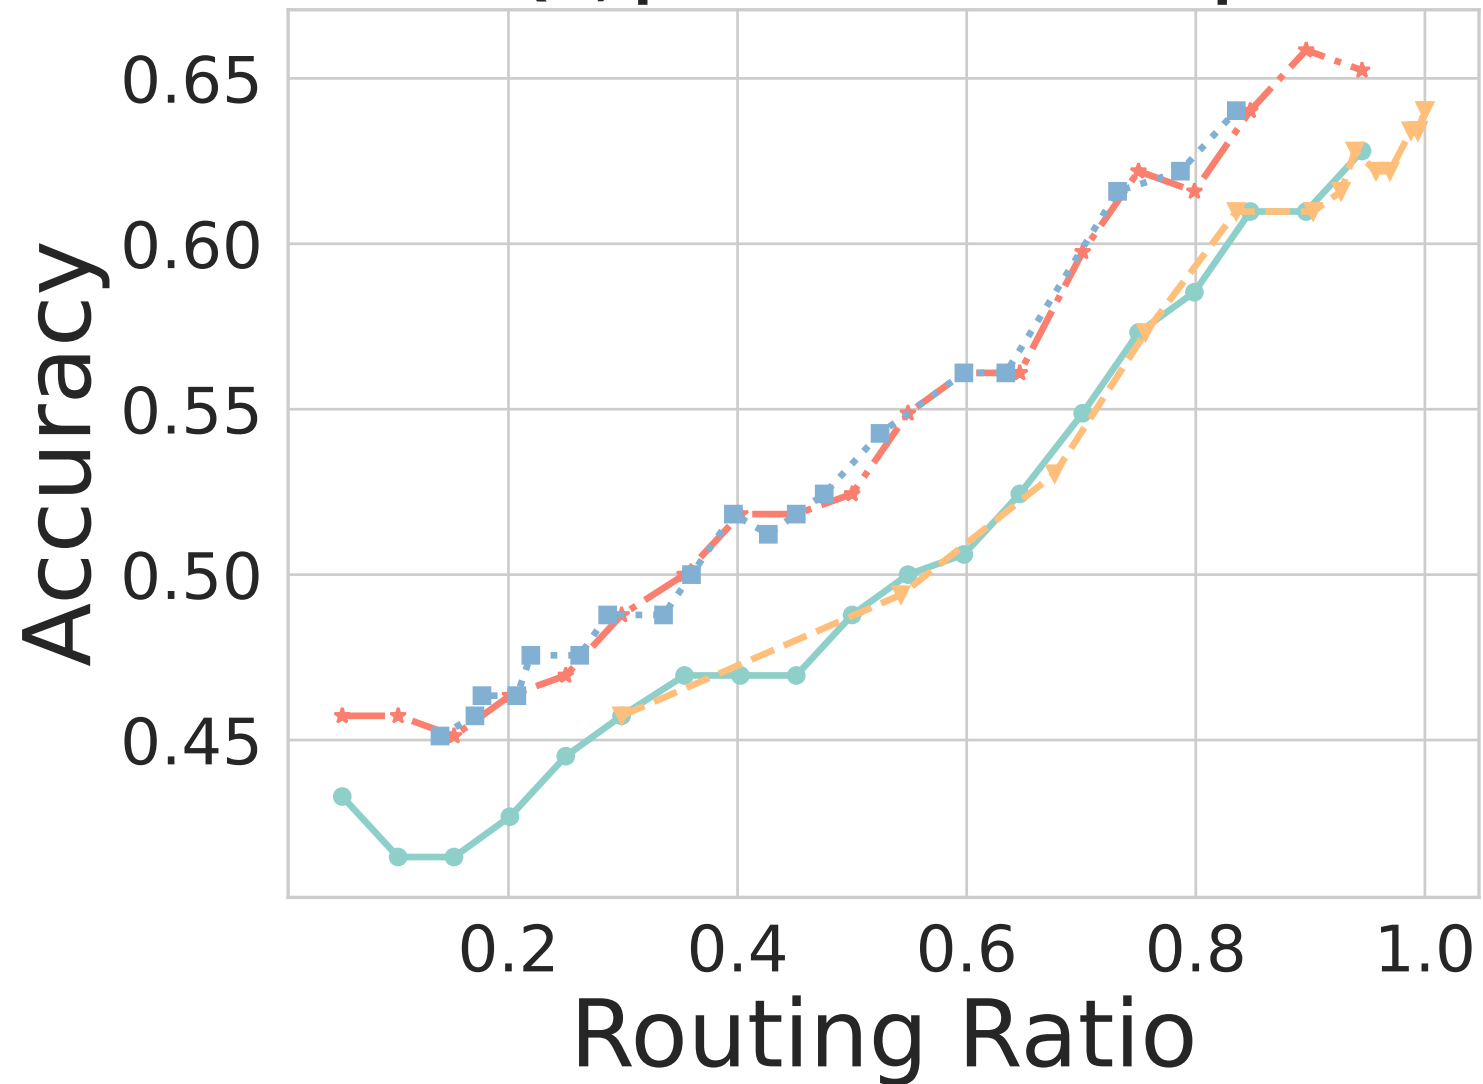

Supplement: supplementary_material [file cali_down_truthful_qa_phi-3.5-mini_deepseek-reasoner.pdf › Routing_SLM_LLMs/Proxy_routing_prediction/to_deepseek-reasoner/truthful_qa_as_downstream/cali_down_truthful_qa_phi-3.5-mini_deepseek-reasoner.pdf]

# TruthfulQA, phi-4-mini-reasoning to DeepSeek-R1

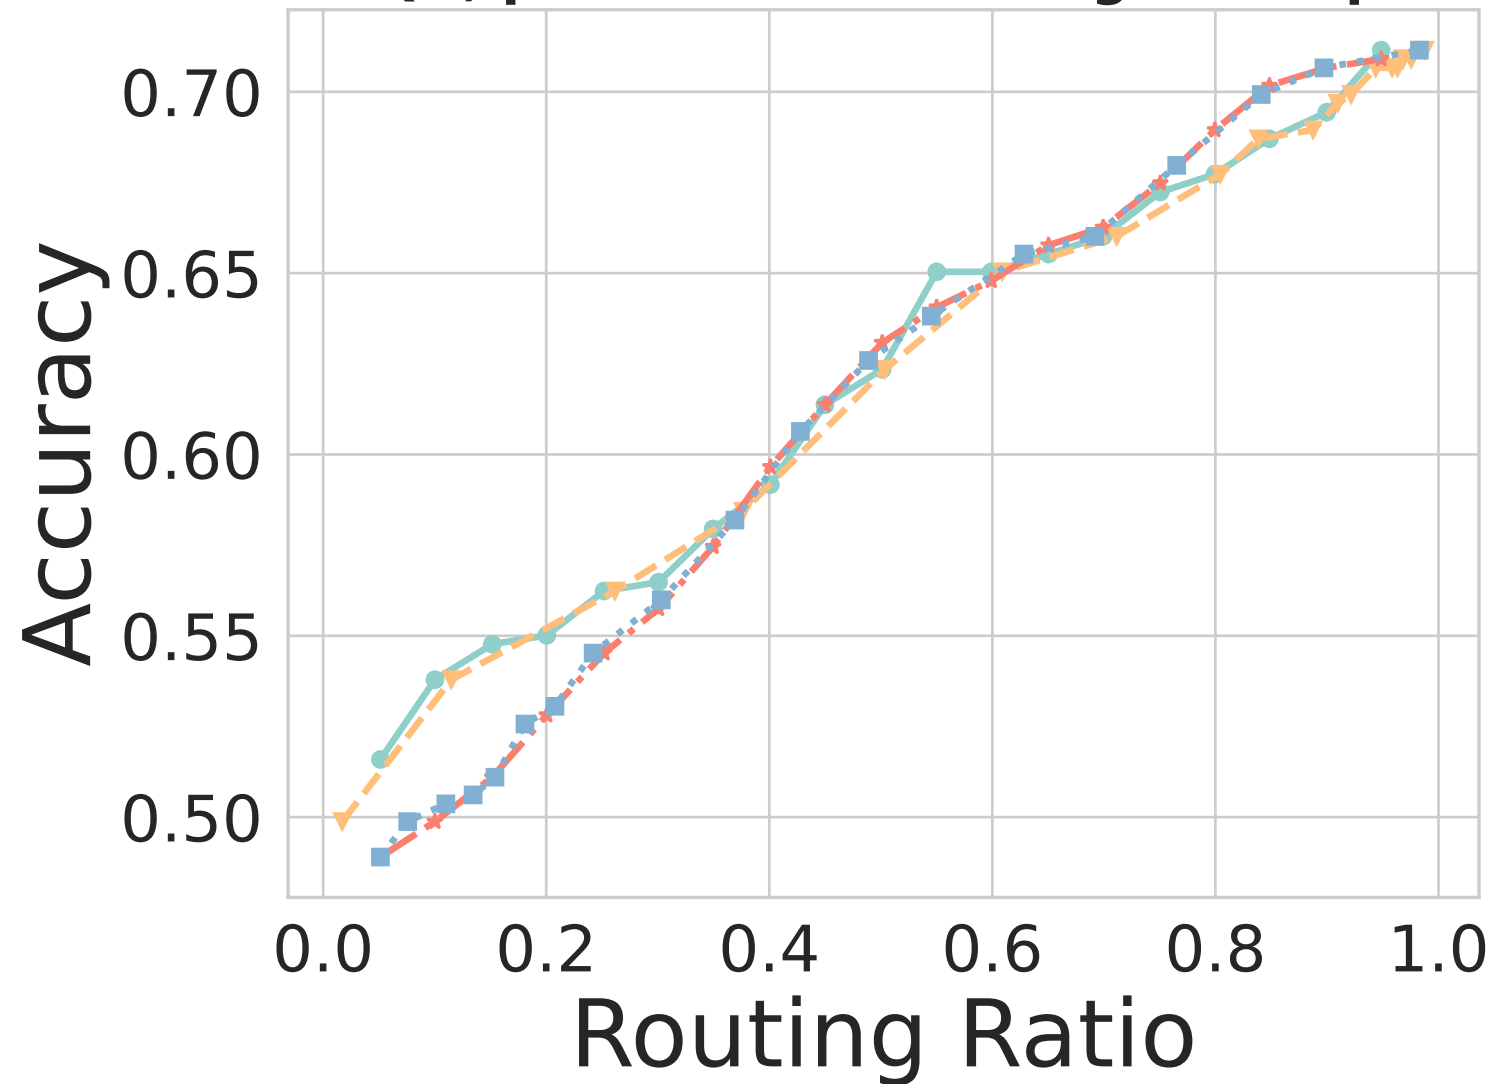

Supplement: supplementary_material [file cali_down_truthful_qa_phi-4-mini-reasoning_deepseek-reasoner.pdf › Routing_SLM_LLMs/Proxy_routing_prediction/to_deepseek-reasoner/truthful_qa_as_downstream/cali_down_truthful_qa_phi-4-mini-reasoning_deepseek-reasoner.pdf]

# TruthfulQA, qwen-2.5-7b to DeepSeek-R1

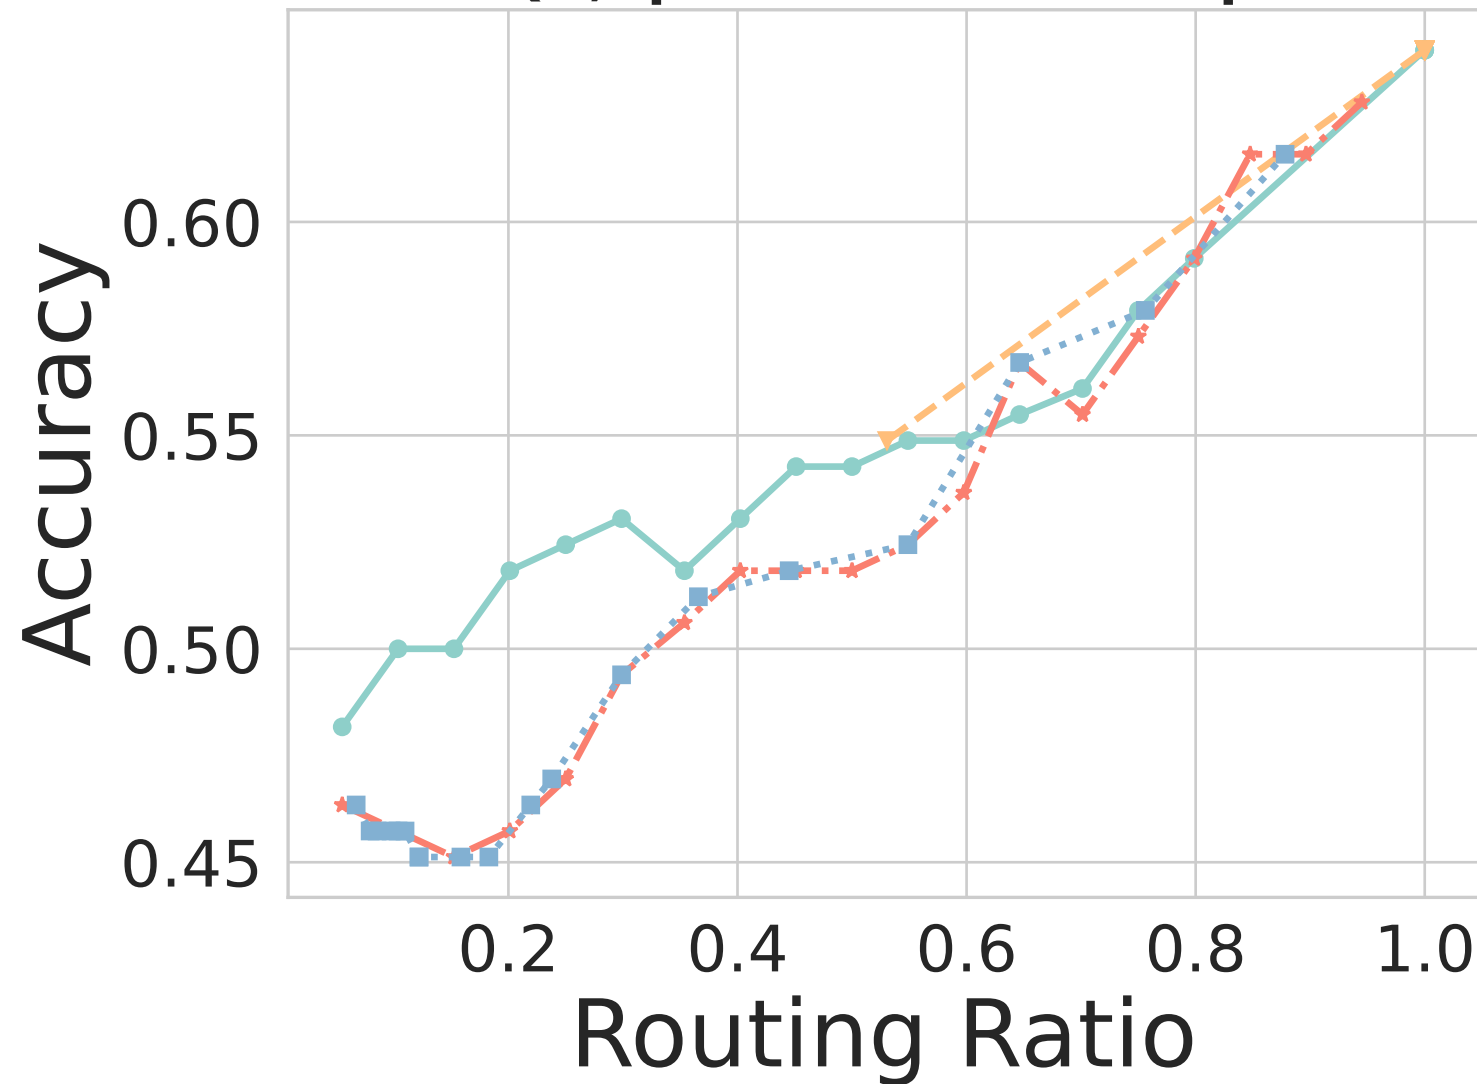

Supplement: supplementary_material [file cali_down_truthful_qa_qwen-2.5-7b_deepseek-reasoner.pdf › Routing_SLM_LLMs/Proxy_routing_prediction/to_deepseek-reasoner/truthful_qa_as_downstream/cali_down_truthful_qa_qwen-2.5-7b_deepseek-reasoner.pdf]

**TruthfulQA, rwkv to DeepSeek-R1**

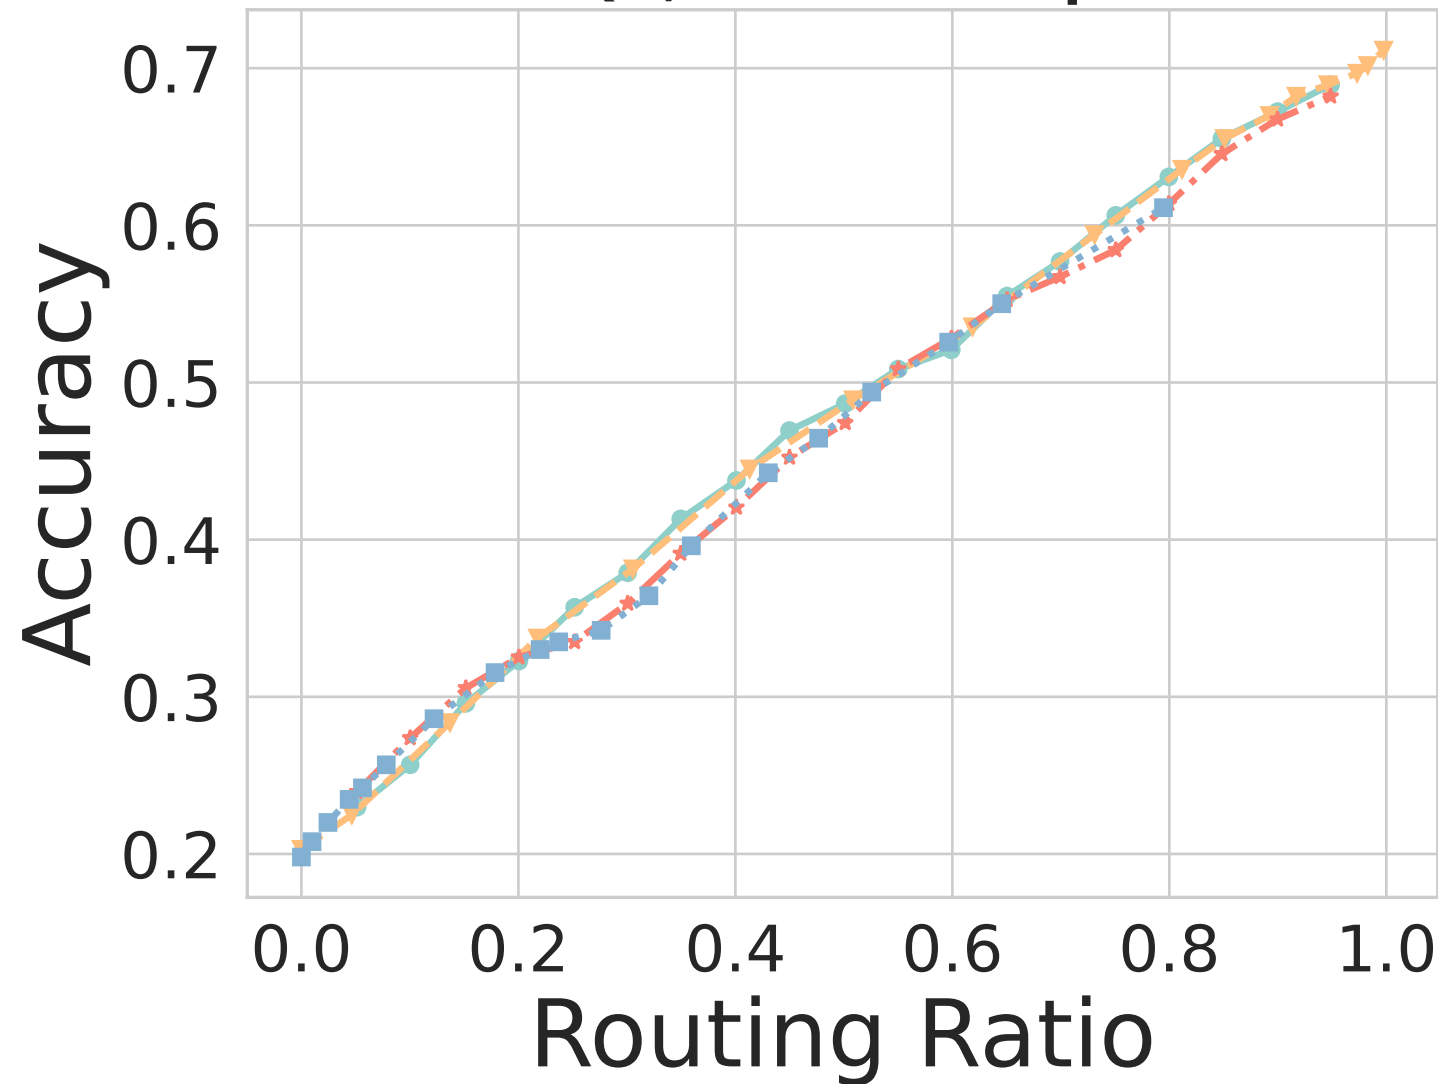

Supplement: supplementary_material [file cali_down_truthful_qa_rwkv_deepseek-reasoner.pdf › Routing_SLM_LLMs/Proxy_routing_prediction/to_deepseek-reasoner/truthful_qa_as_downstream/cali_down_truthful_qa_rwkv_deepseek-reasoner.pdf]

# WinoGrande, Qwen3-0.6B to DeepSeek-R1

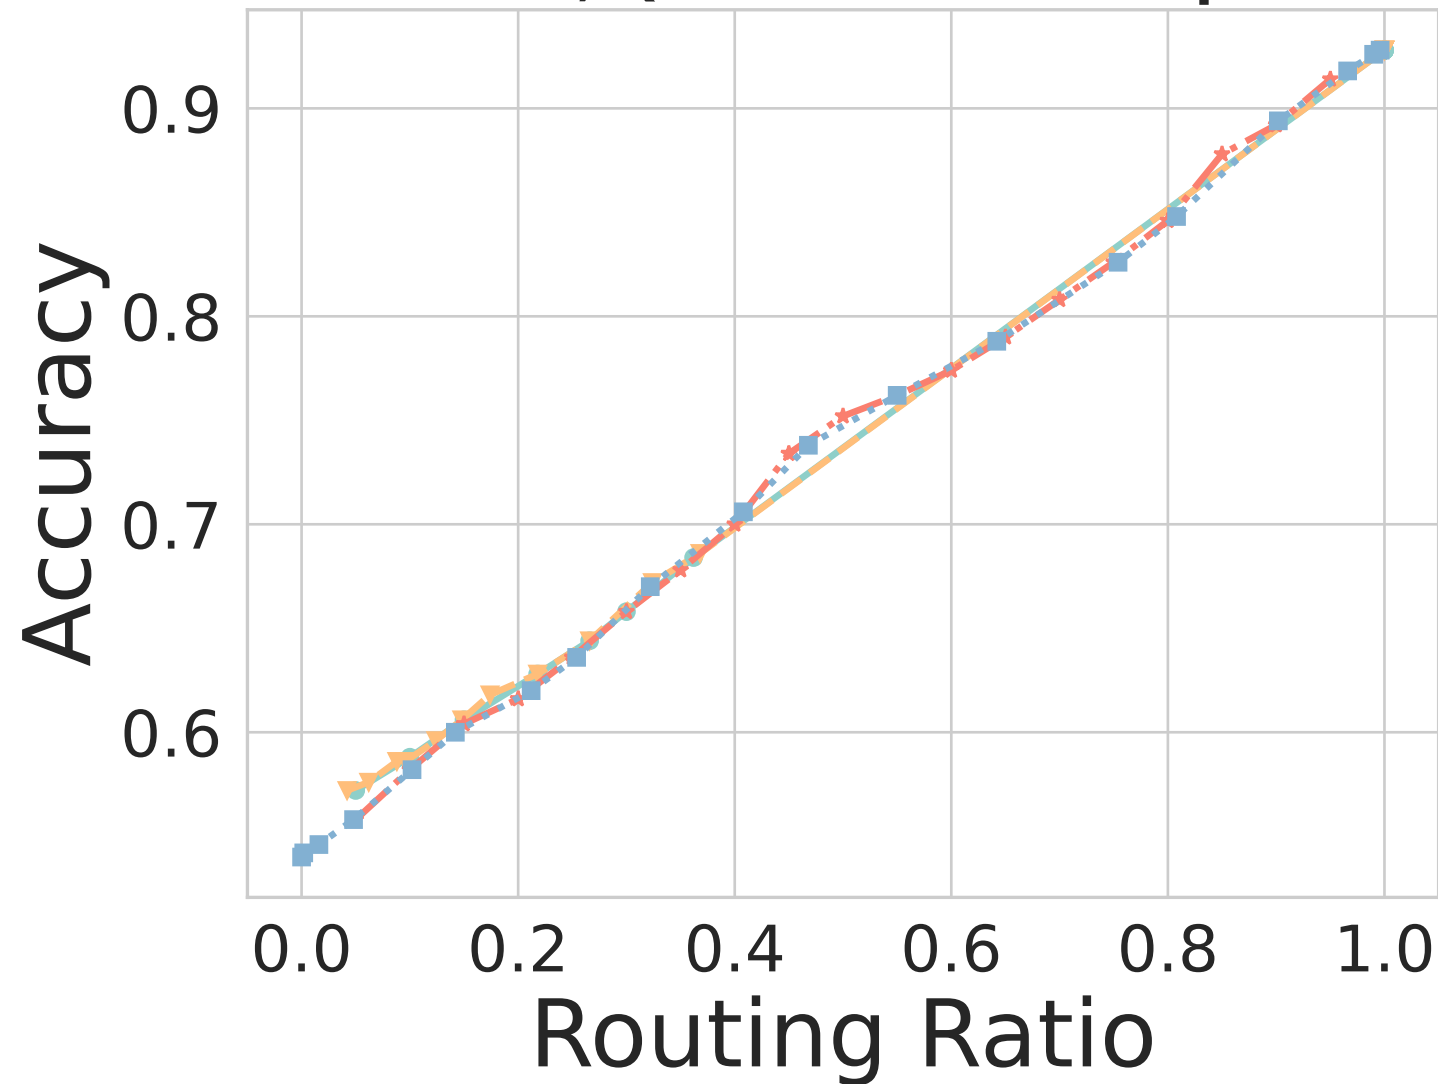

Supplement: supplementary_material [file cali_down_winogrande_Qwen3-0.6B_deepseek-reasoner.pdf › Routing_SLM_LLMs/Proxy_routing_prediction/to_deepseek-reasoner/winogrande_as_downstream/cali_down_winogrande_Qwen3-0.6B_deepseek-reasoner.pdf]

# WinoGrande, Qwen3-1.7B to DeepSeek-R1

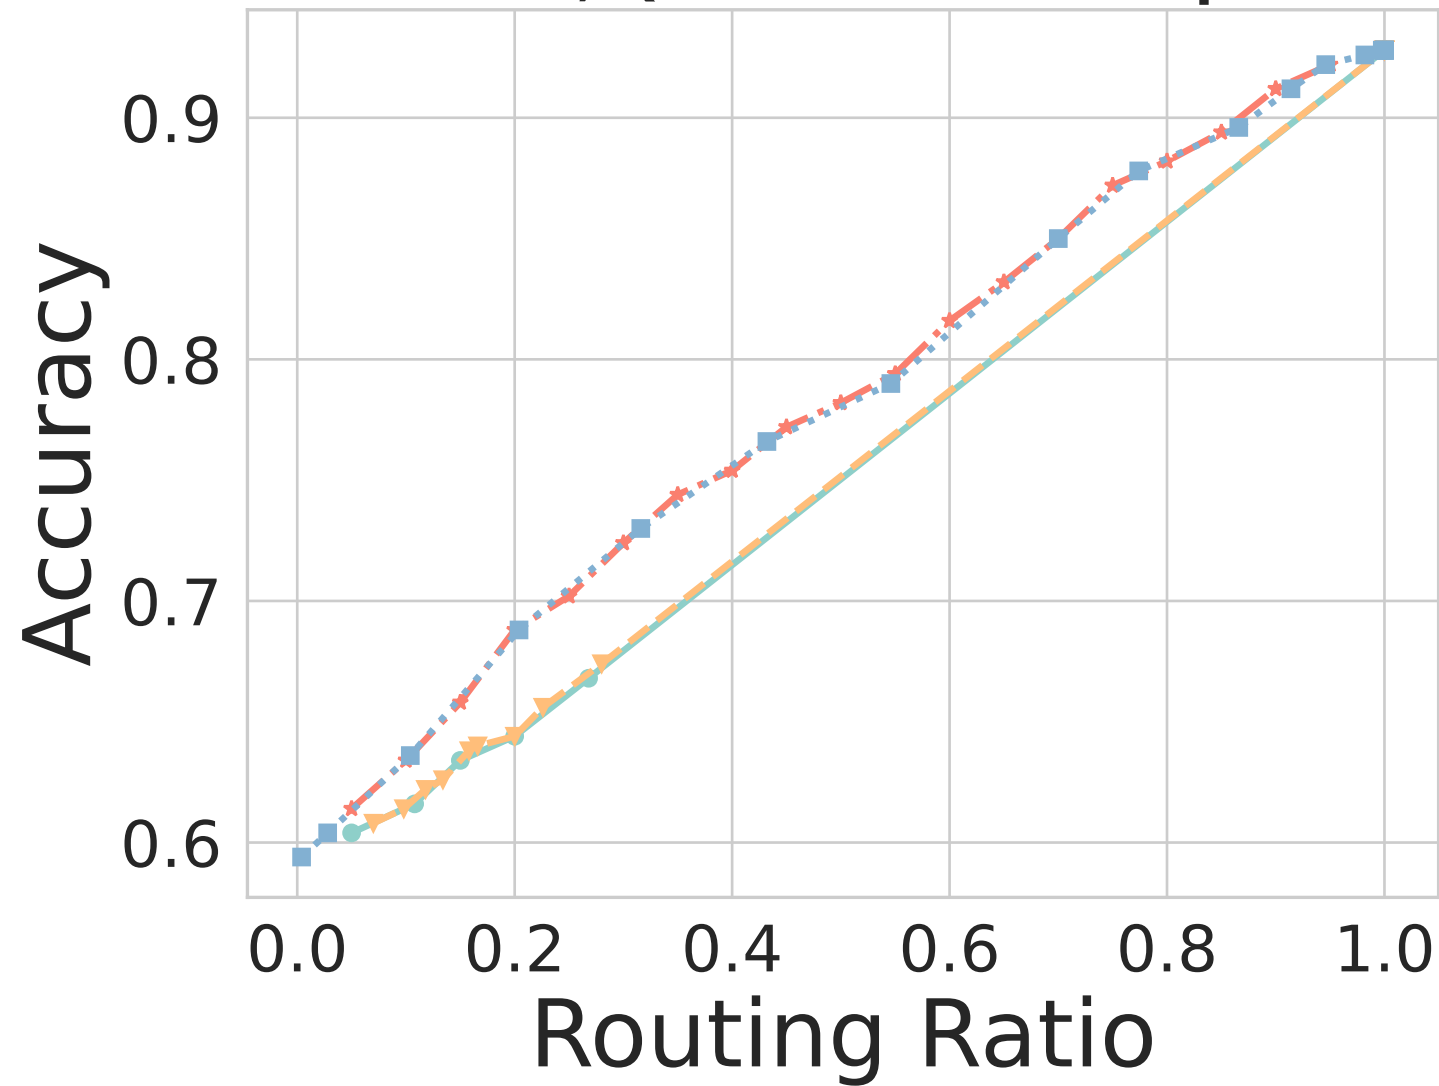

Supplement: supplementary_material [file cali_down_winogrande_Qwen3-1.7B_deepseek-reasoner.pdf › Routing_SLM_LLMs/Proxy_routing_prediction/to_deepseek-reasoner/winogrande_as_downstream/cali_down_winogrande_Qwen3-1.7B_deepseek-reasoner.pdf]

# WinoGrande, Qwen3-4B to DeepSeek-R1

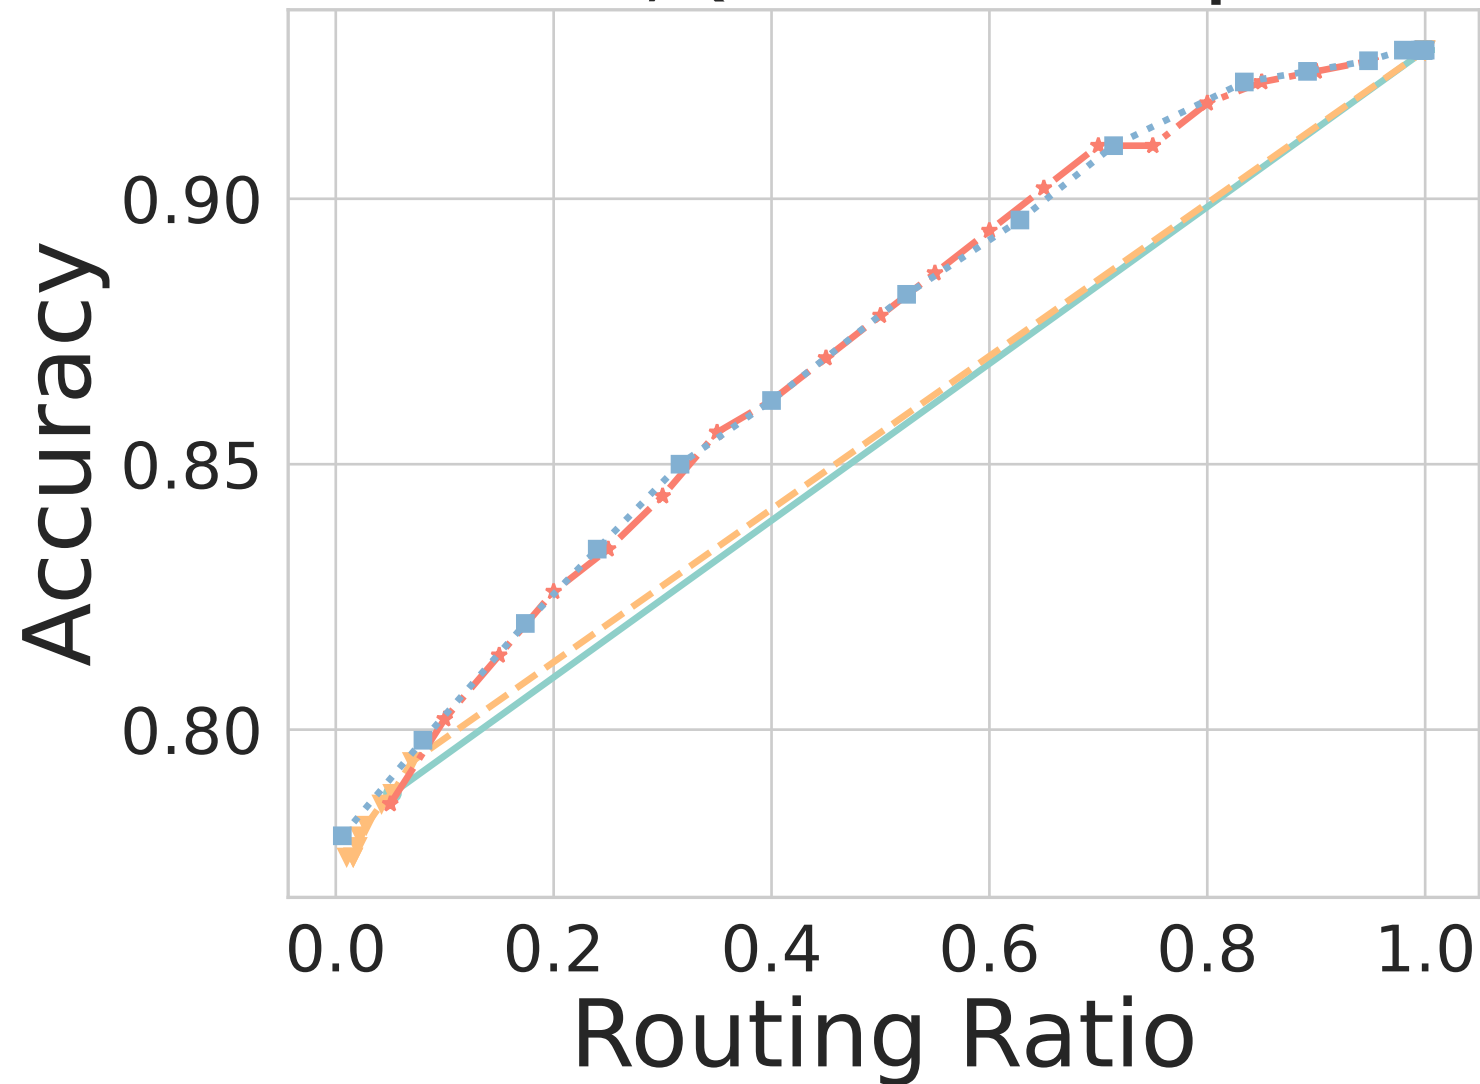

Supplement: supplementary_material [file cali_down_winogrande_Qwen3-4B_deepseek-reasoner.pdf › Routing_SLM_LLMs/Proxy_routing_prediction/to_deepseek-reasoner/winogrande_as_downstream/cali_down_winogrande_Qwen3-4B_deepseek-reasoner.pdf]

# WinoGrande, granite-3.1-8b to DeepSeek-R1

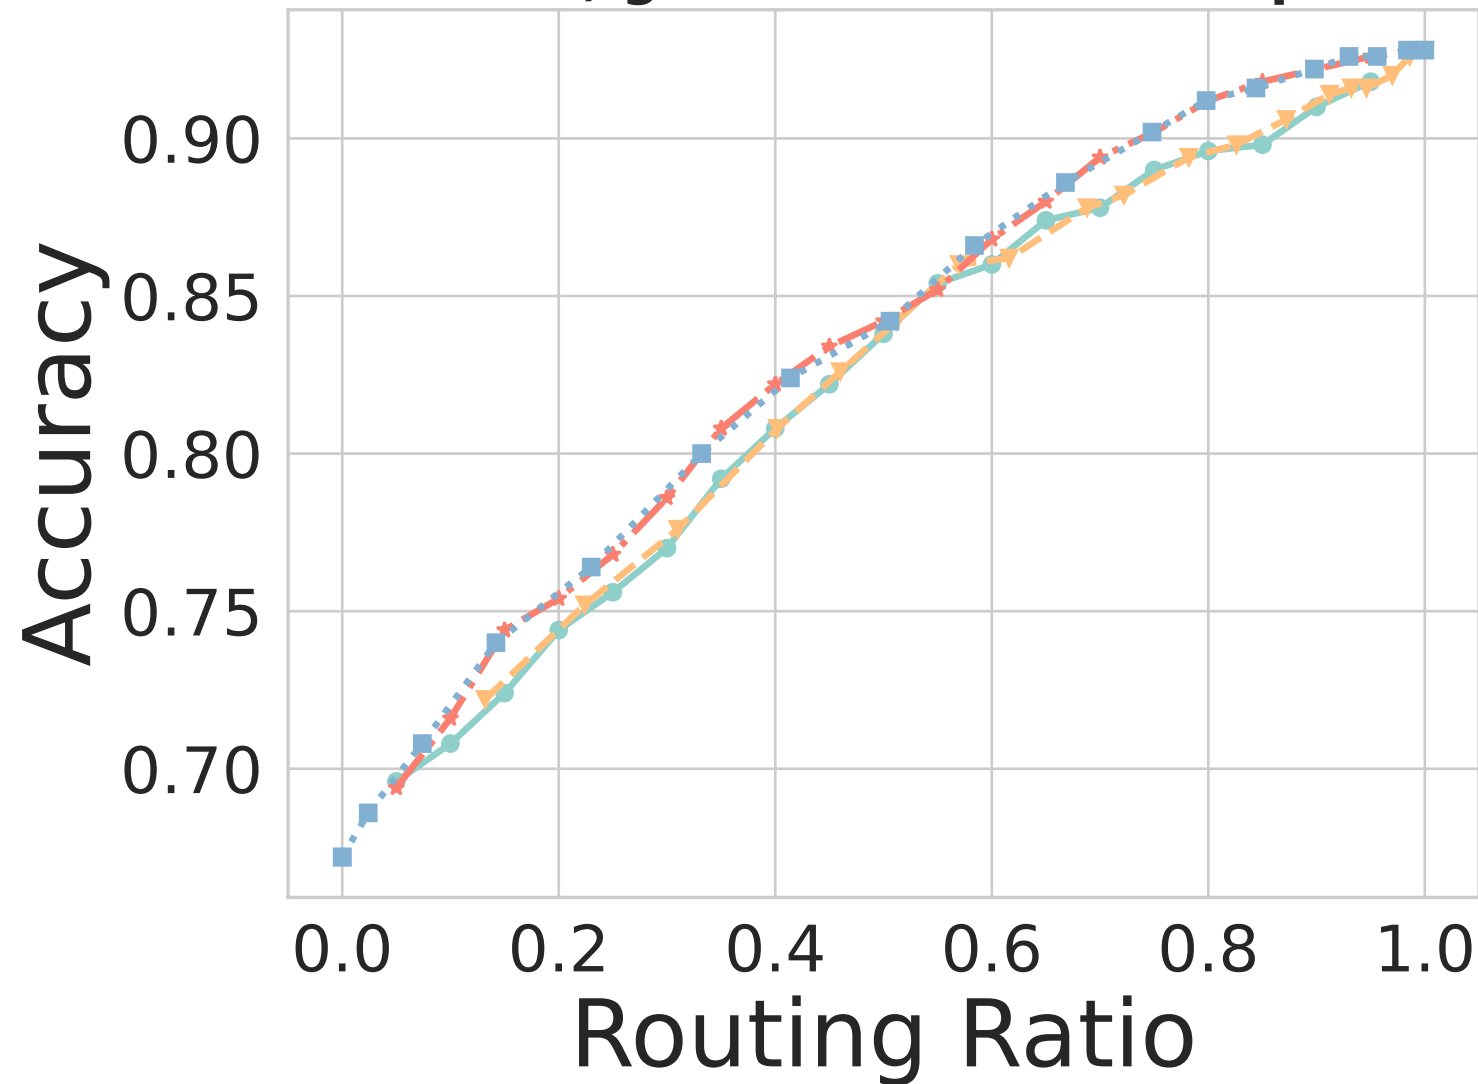

Supplement: supplementary_material [file cali_down_winogrande_granite-3.1-8b_deepseek-reasoner.pdf › Routing_SLM_LLMs/Proxy_routing_prediction/to_deepseek-reasoner/winogrande_as_downstream/cali_down_winogrande_granite-3.1-8b_deepseek-reasoner.pdf]

# WinoGrande, llama-3.1-8b to DeepSeek-R1

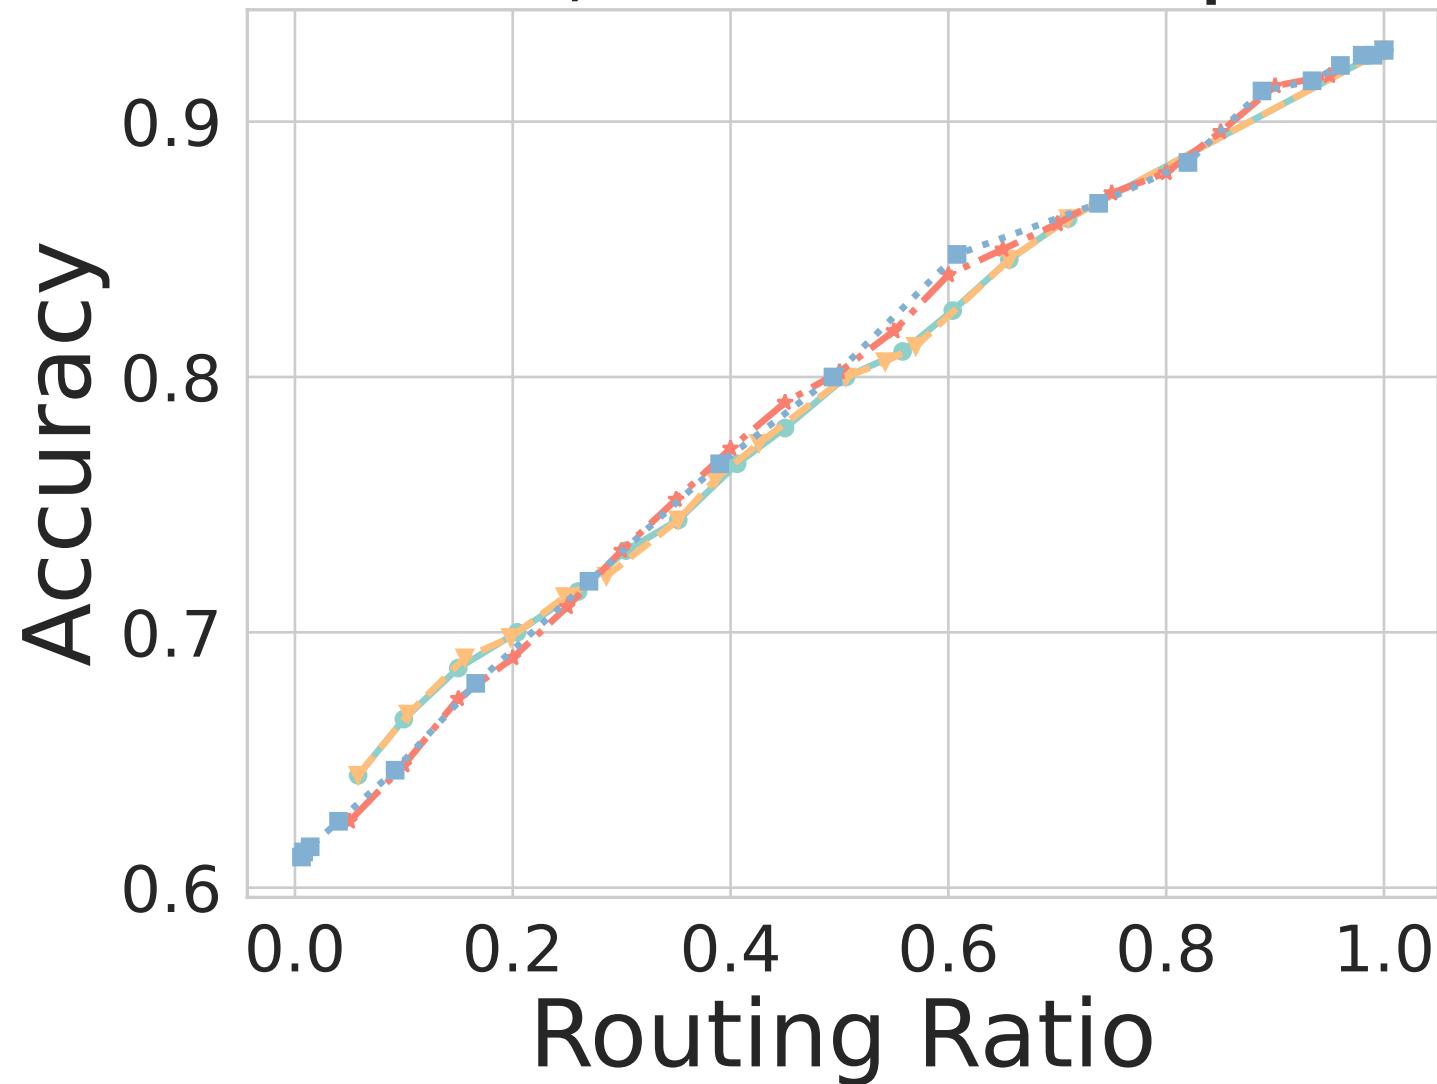

Supplement: supplementary_material [file cali_down_winogrande_llama-3.1-8b_deepseek-reasoner.pdf › Routing_SLM_LLMs/Proxy_routing_prediction/to_deepseek-reasoner/winogrande_as_downstream/cali_down_winogrande_llama-3.1-8b_deepseek-reasoner.pdf]

# WinoGrande, llama-3.2-1b to DeepSeek-R1

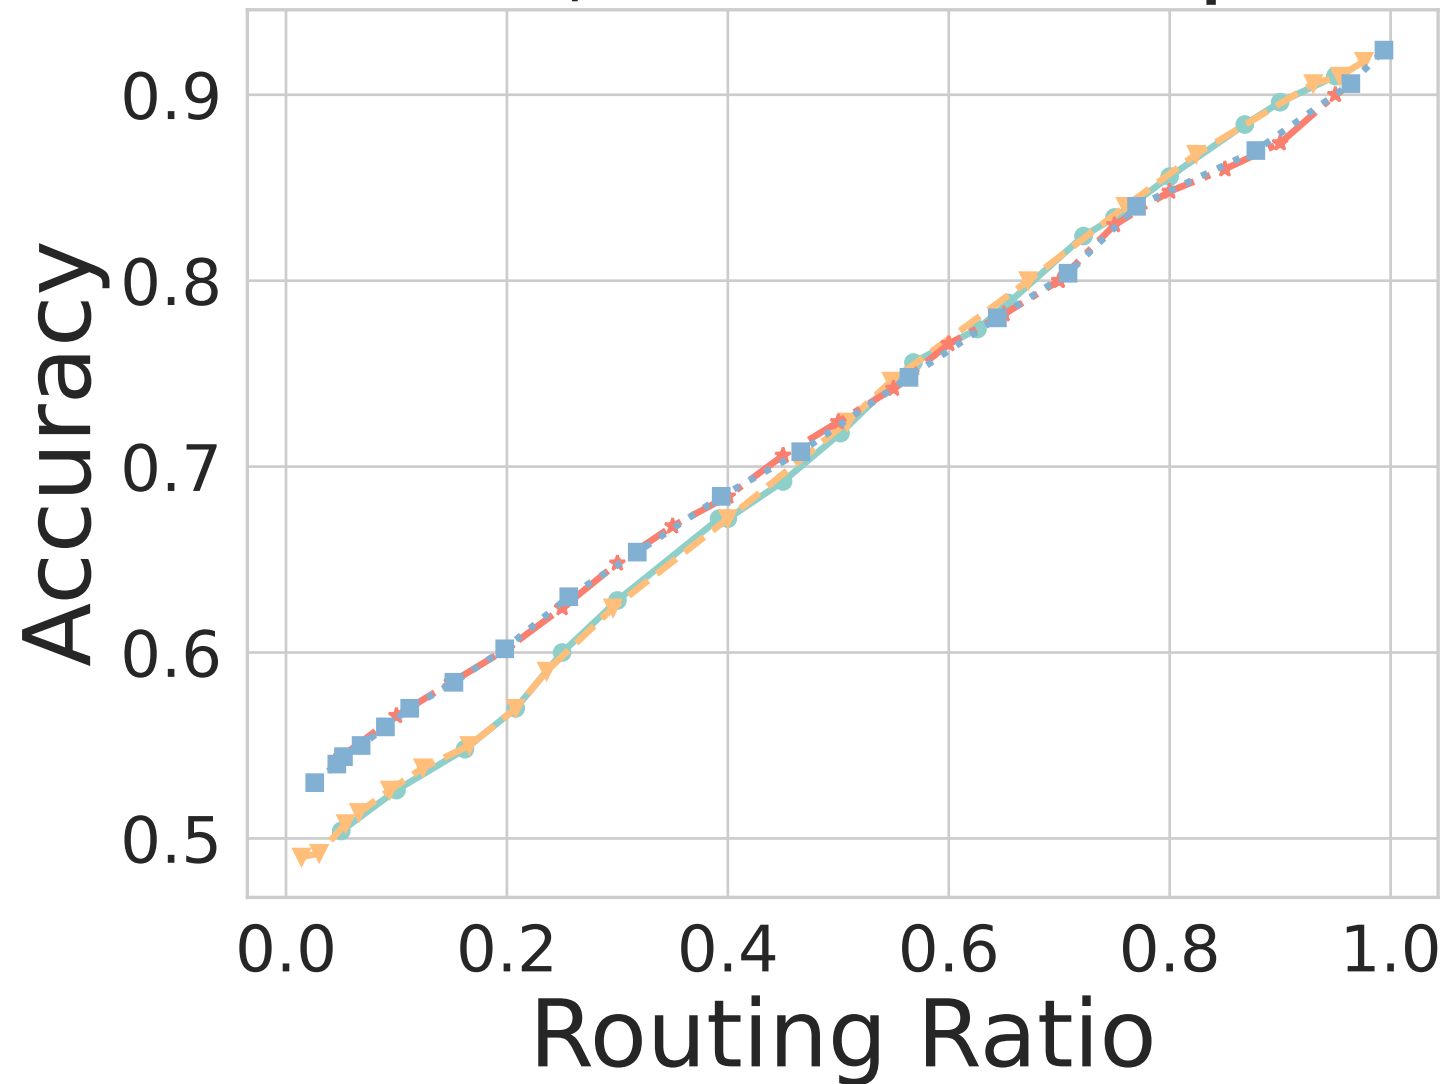

Supplement: supplementary_material [file cali_down_winogrande_llama-3.2-1b_deepseek-reasoner.pdf › Routing_SLM_LLMs/Proxy_routing_prediction/to_deepseek-reasoner/winogrande_as_downstream/cali_down_winogrande_llama-3.2-1b_deepseek-reasoner.pdf]

# WinoGrande, llama-3.2-3b to DeepSeek-R1

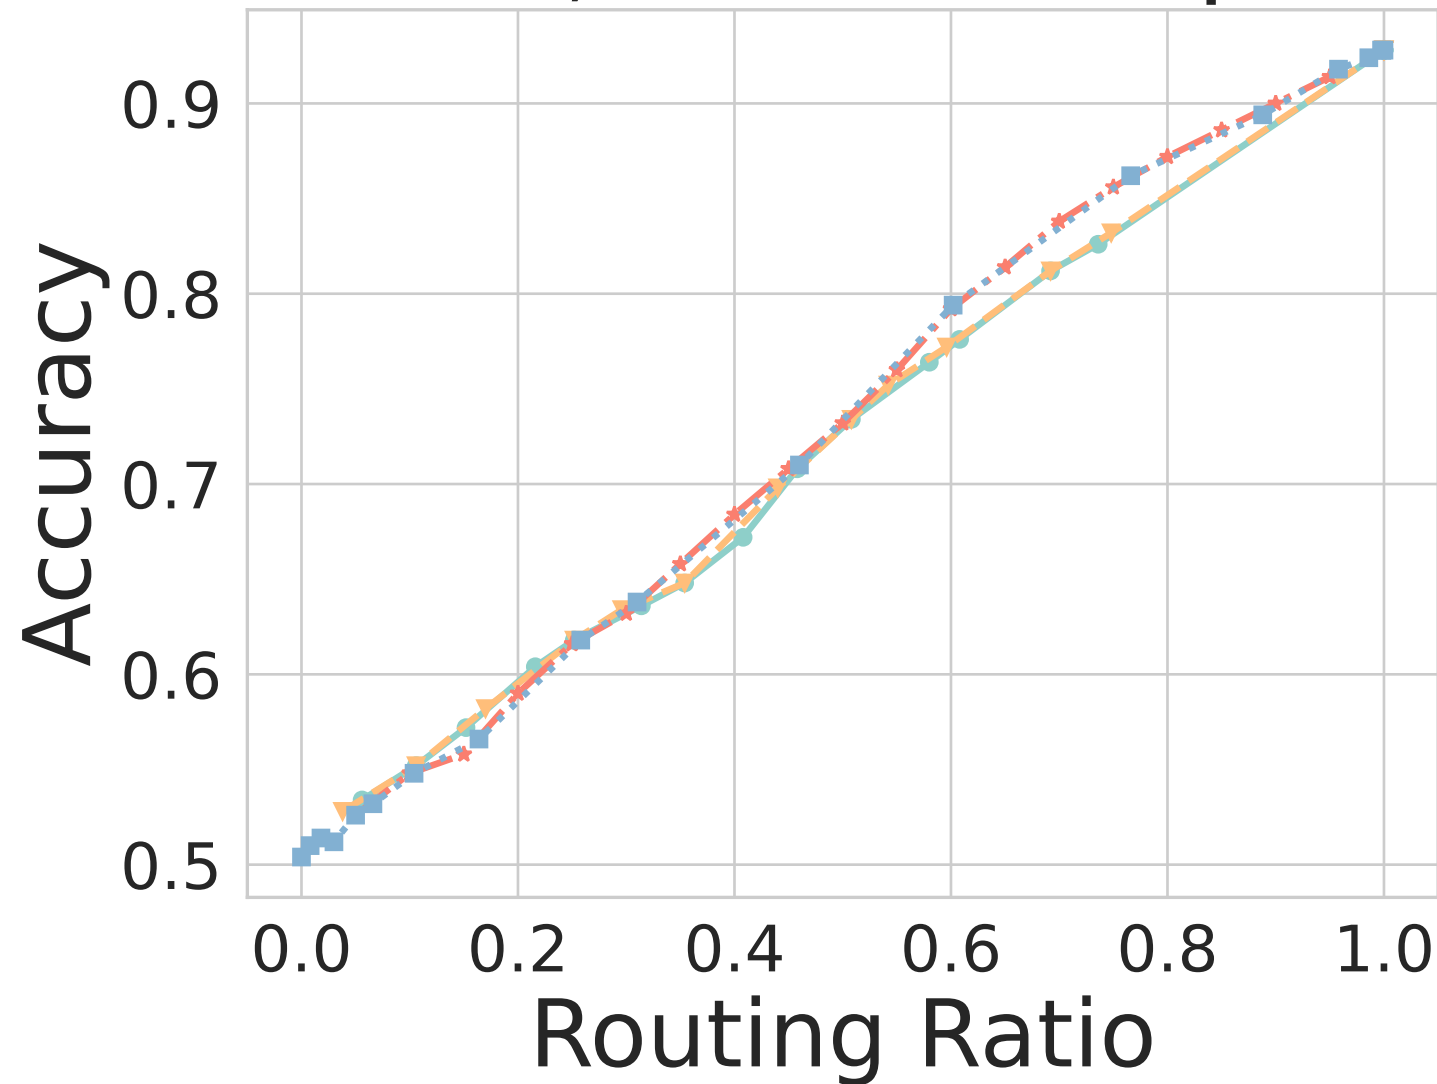

Supplement: supplementary_material [file cali_down_winogrande_llama-3.2-3b_deepseek-reasoner.pdf › Routing_SLM_LLMs/Proxy_routing_prediction/to_deepseek-reasoner/winogrande_as_downstream/cali_down_winogrande_llama-3.2-3b_deepseek-reasoner.pdf]

# WinoGrande, mistral-7b to DeepSeek-R1

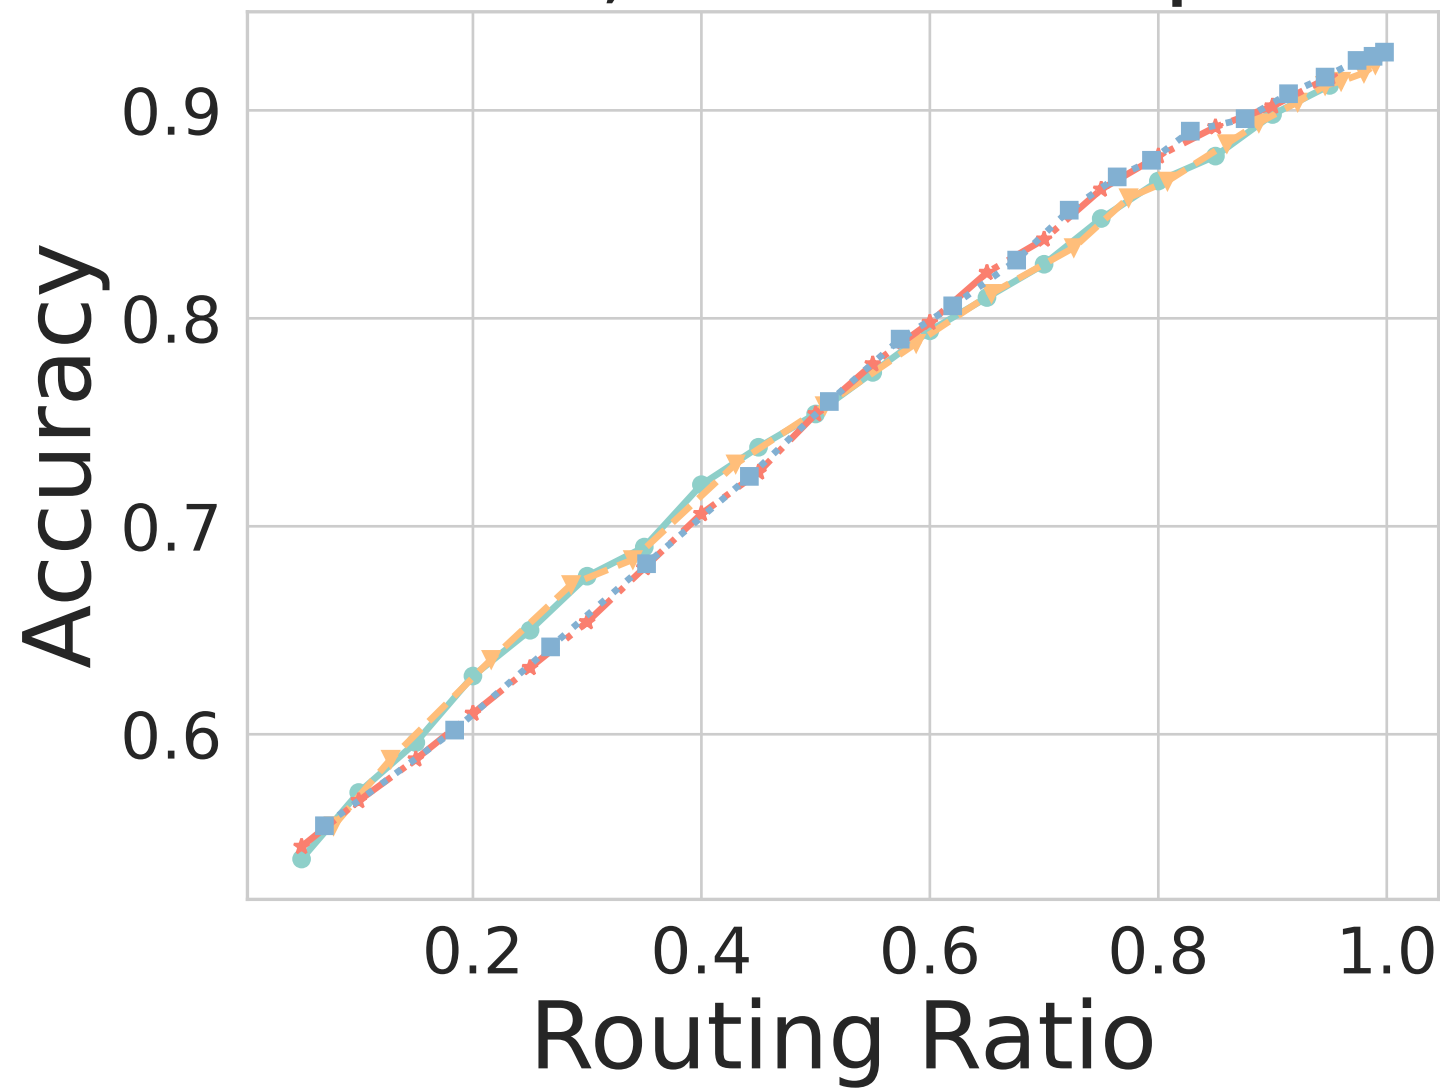

Supplement: supplementary_material [file cali_down_winogrande_mistral-7b_deepseek-reasoner.pdf › Routing_SLM_LLMs/Proxy_routing_prediction/to_deepseek-reasoner/winogrande_as_downstream/cali_down_winogrande_mistral-7b_deepseek-reasoner.pdf]

**WinoGrande, phi-3.5-mini to DeepSeek-R1**

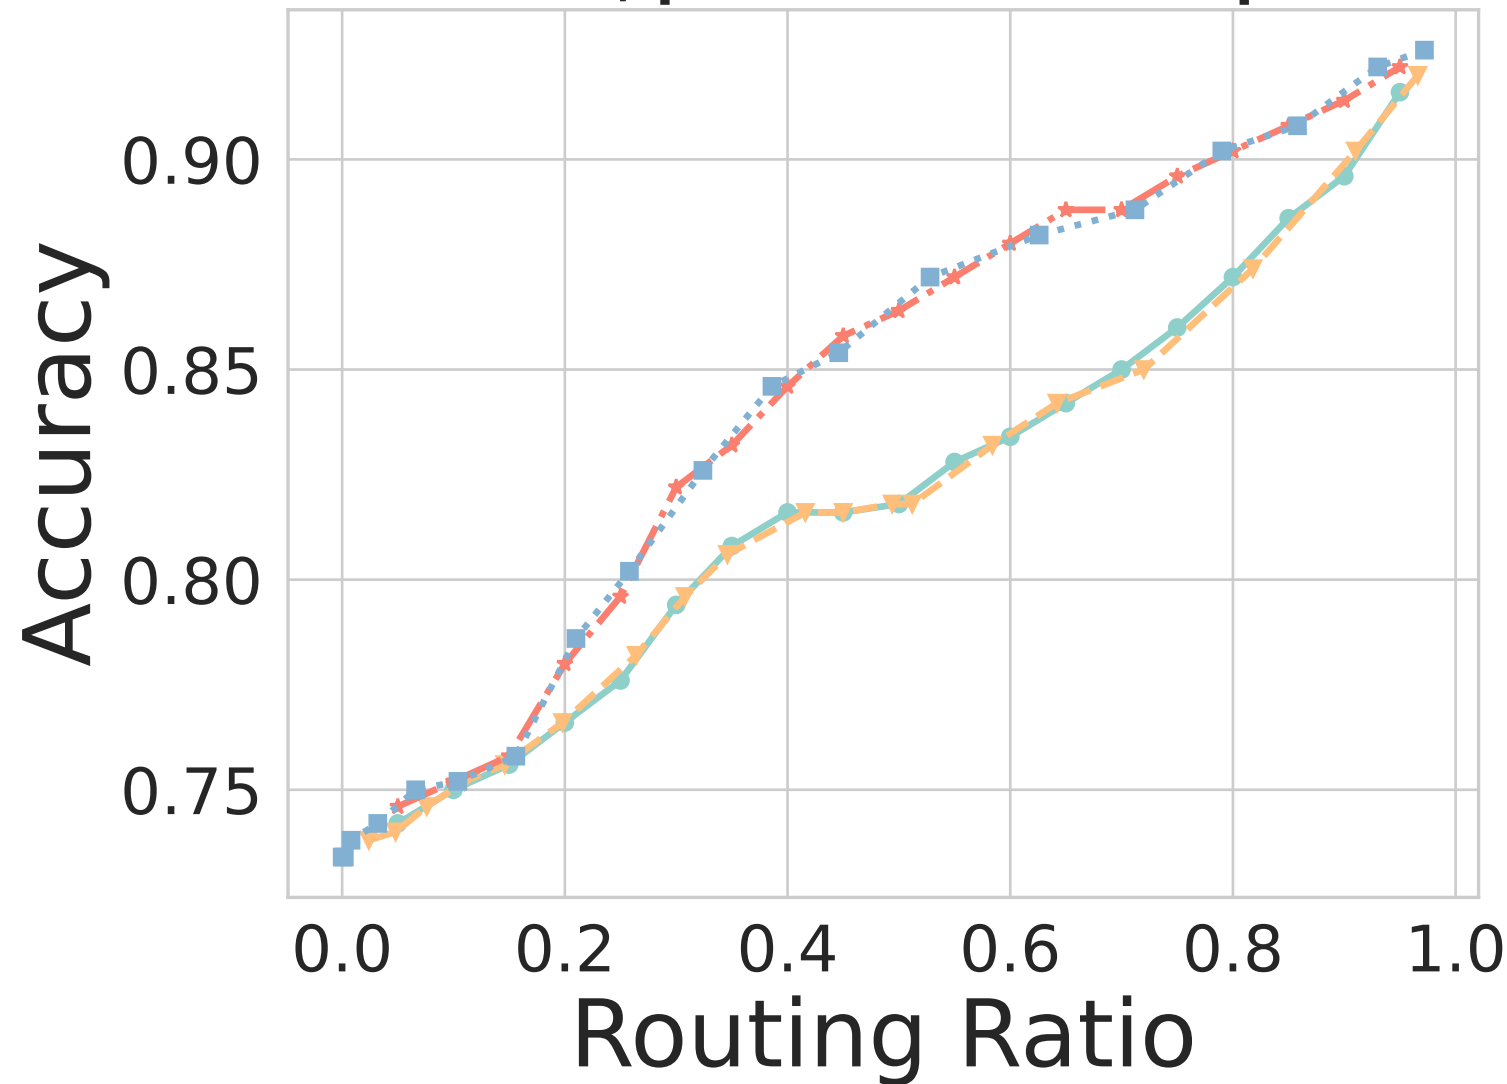

Supplement: supplementary_material [file cali_down_winogrande_phi-3.5-mini_deepseek-reasoner.pdf › Routing_SLM_LLMs/Proxy_routing_prediction/to_deepseek-reasoner/winogrande_as_downstream/cali_down_winogrande_phi-3.5-mini_deepseek-reasoner.pdf]

# WinoGrande, phi-4-mini-reasoning to DeepSeek-R1

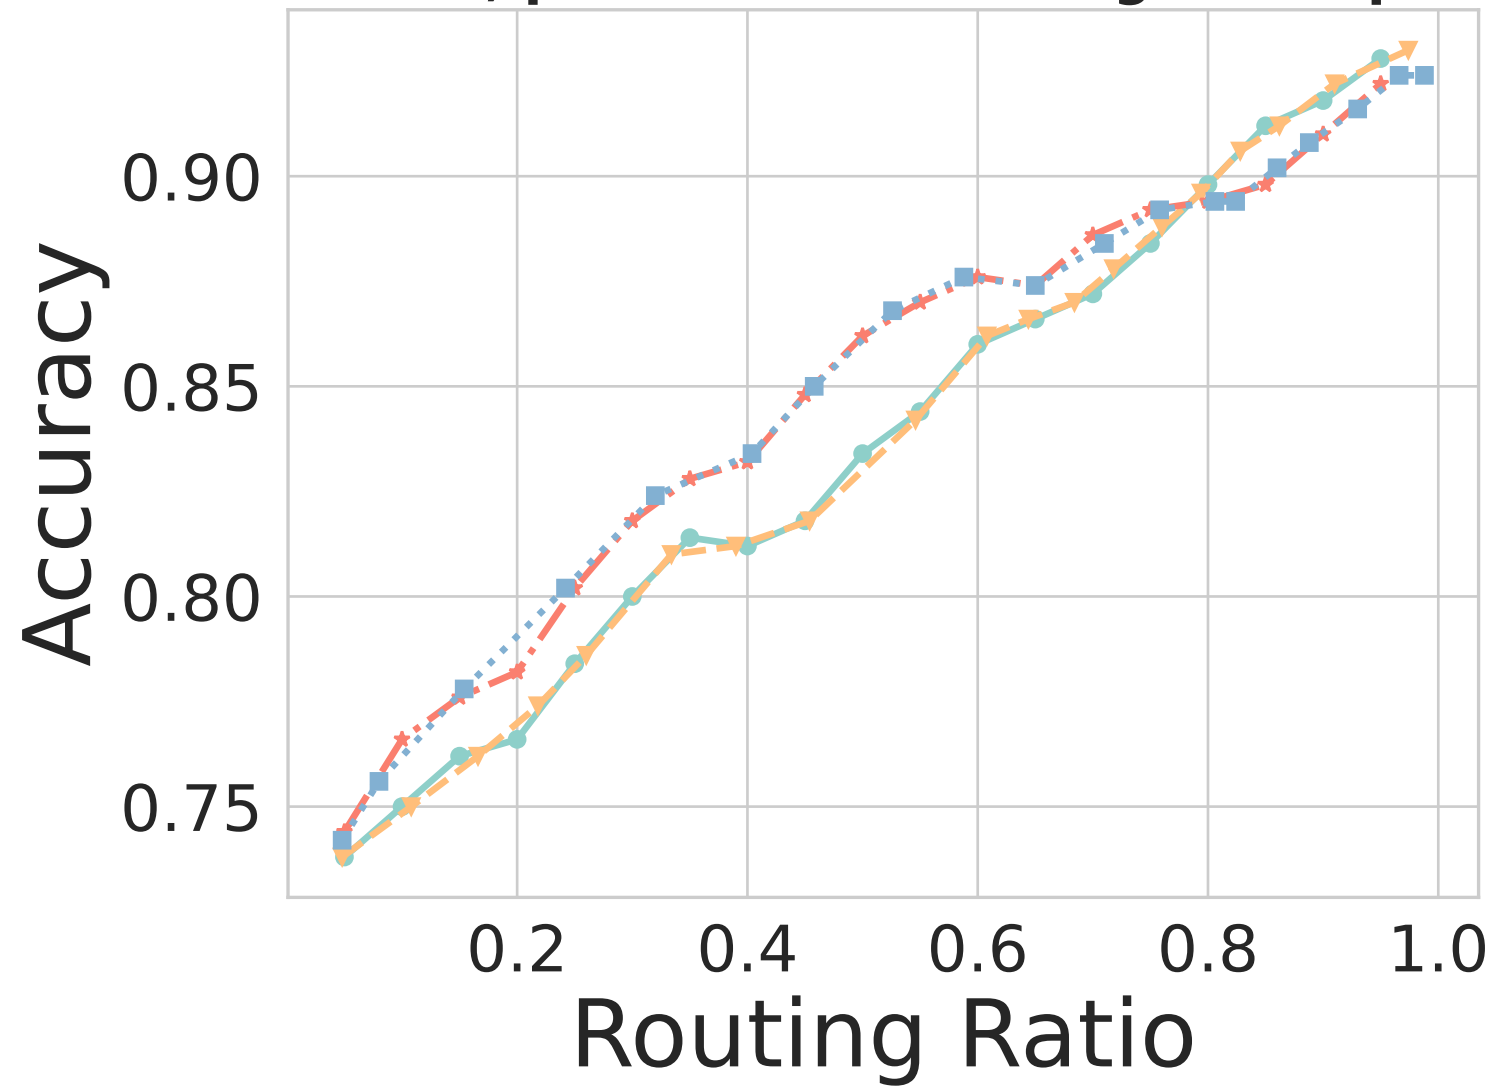

Supplement: supplementary_material [file cali_down_winogrande_phi-4-mini-reasoning_deepseek-reasoner.pdf › Routing_SLM_LLMs/Proxy_routing_prediction/to_deepseek-reasoner/winogrande_as_downstream/cali_down_winogrande_phi-4-mini-reasoning_deepseek-reasoner.pdf]

# WinoGrande, qwen-2.5-7b to DeepSeek-R1

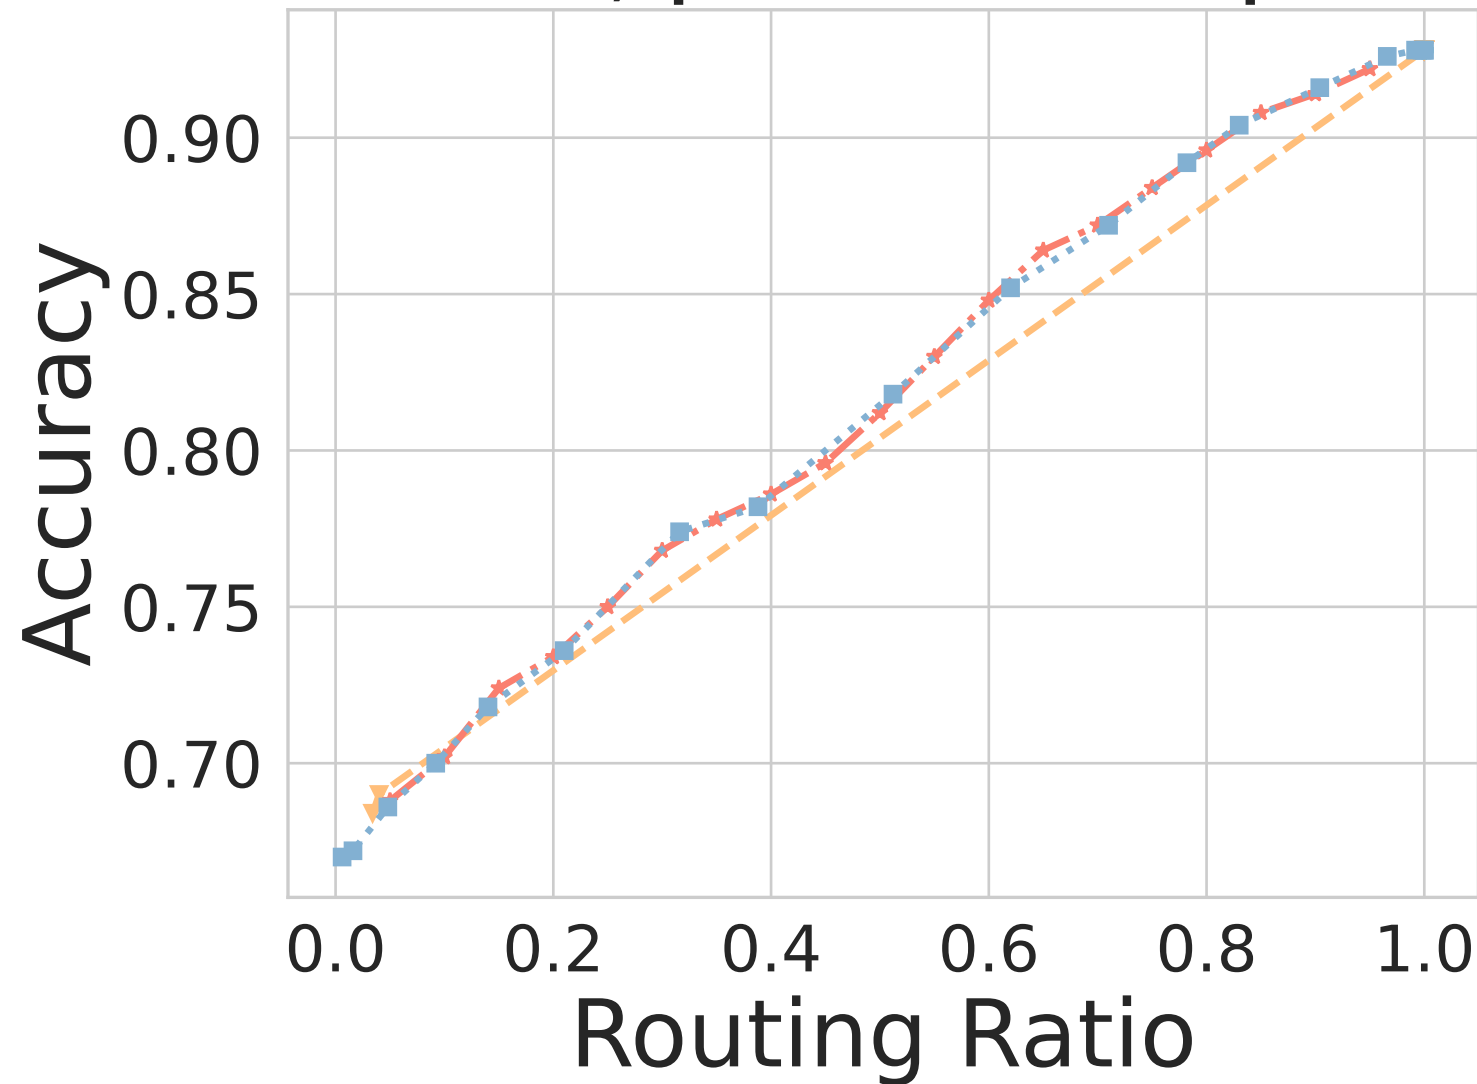

Supplement: supplementary_material [file cali_down_winogrande_qwen-2.5-7b_deepseek-reasoner.pdf › Routing_SLM_LLMs/Proxy_routing_prediction/to_deepseek-reasoner/winogrande_as_downstream/cali_down_winogrande_qwen-2.5-7b_deepseek-reasoner.pdf]

**WinoGrande, rwkv to DeepSeek-R1**

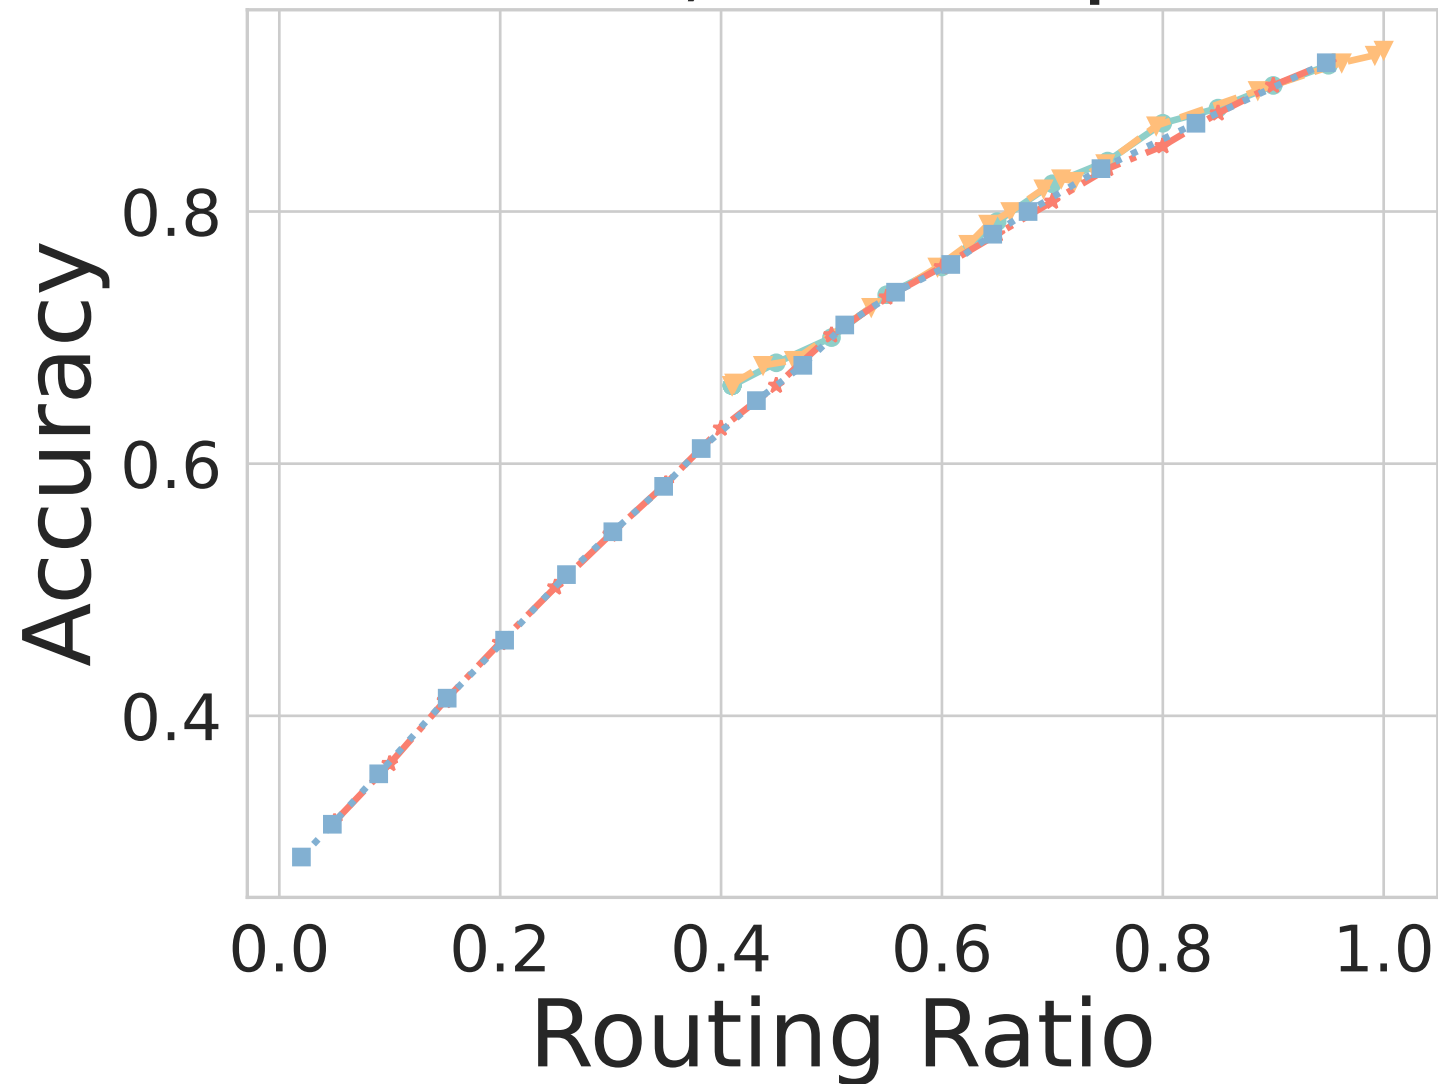

Supplement: supplementary_material [file cali_down_winogrande_rwkv_deepseek-reasoner.pdf › Routing_SLM_LLMs/Proxy_routing_prediction/to_deepseek-reasoner/winogrande_as_downstream/cali_down_winogrande_rwkv_deepseek-reasoner.pdf]

**AQuA, Qwen3-0.6B to GPT-4.1 mini**

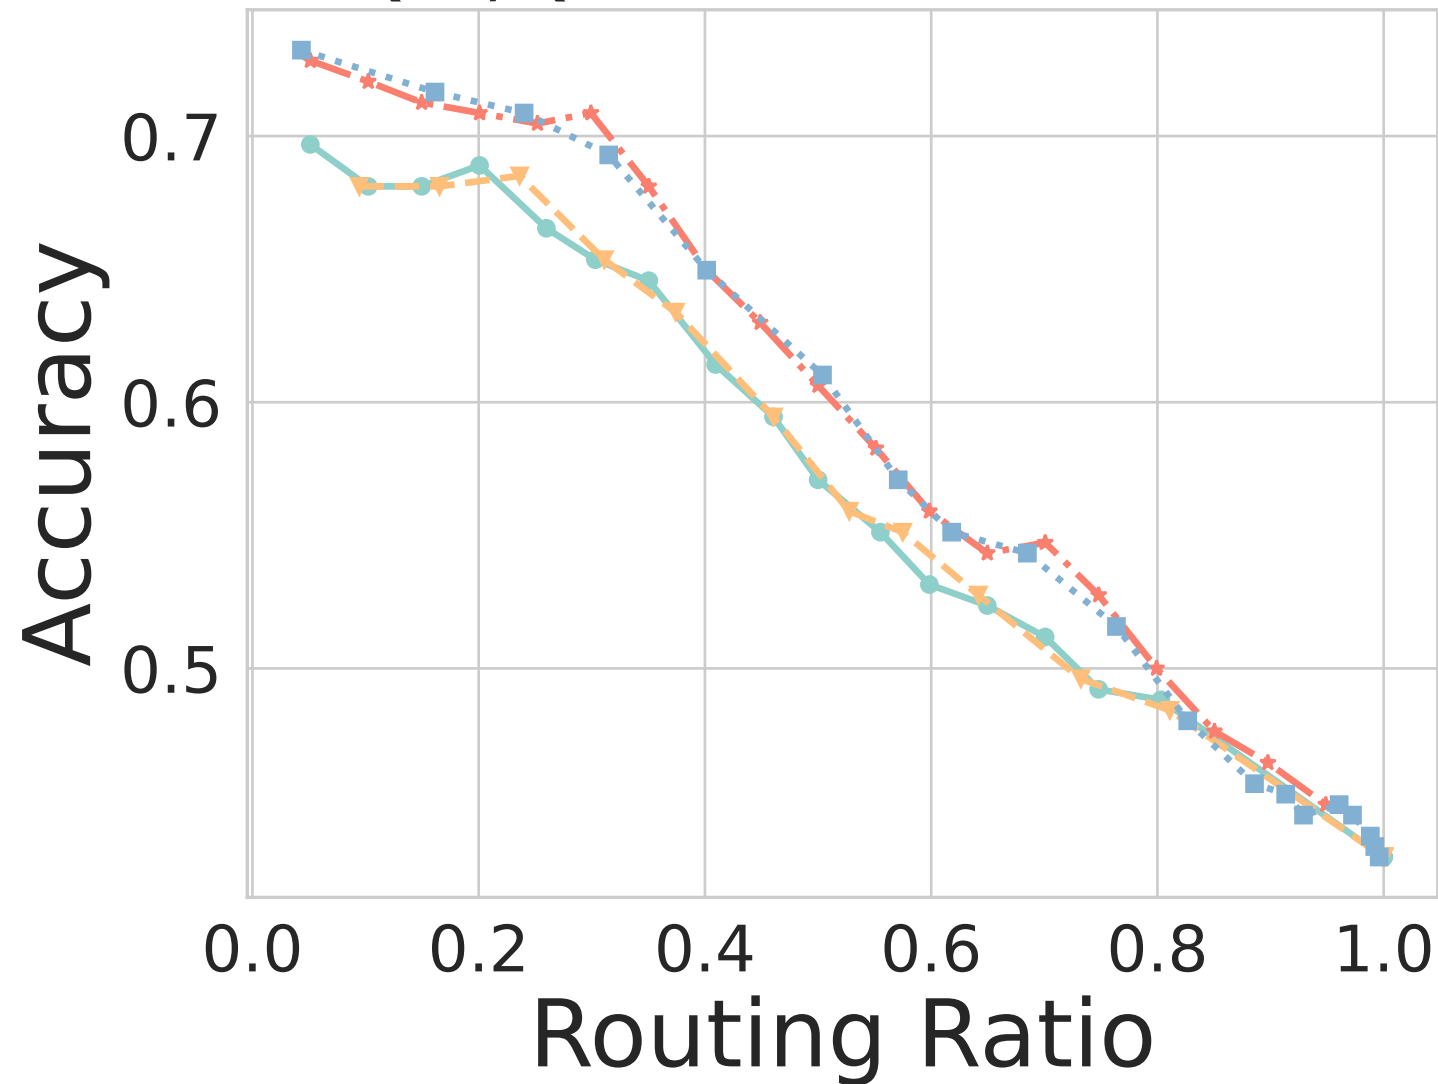

Supplement: supplementary_material [file cali_down_aqua_Qwen3-0.6B_gpt-4.1-mini.pdf › Routing_SLM_LLMs/Proxy_routing_prediction/to_gpt-4.1-mini/aqua_as_downstream/cali_down_aqua_Qwen3-0.6B_gpt-4.1-mini.pdf]

**AQuA, Qwen3-1.7B to GPT-4.1 mini**

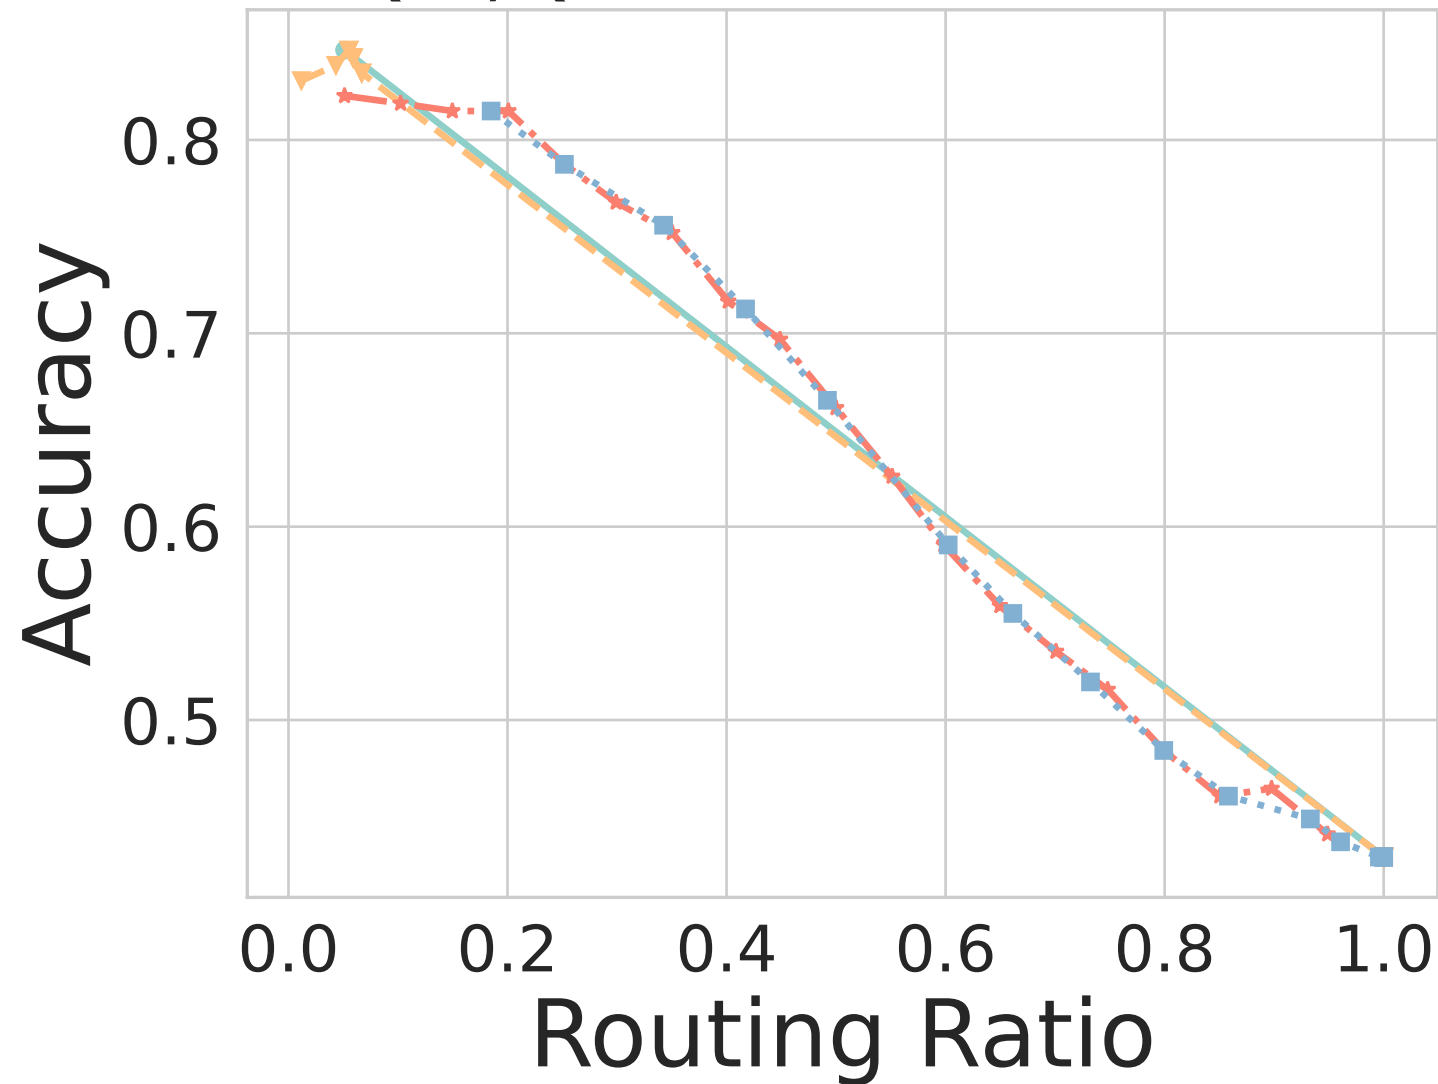

Supplement: supplementary_material [file cali_down_aqua_Qwen3-1.7B_gpt-4.1-mini.pdf › Routing_SLM_LLMs/Proxy_routing_prediction/to_gpt-4.1-mini/aqua_as_downstream/cali_down_aqua_Qwen3-1.7B_gpt-4.1-mini.pdf]

**AQuA, Qwen3-4B to GPT-4.1 mini**

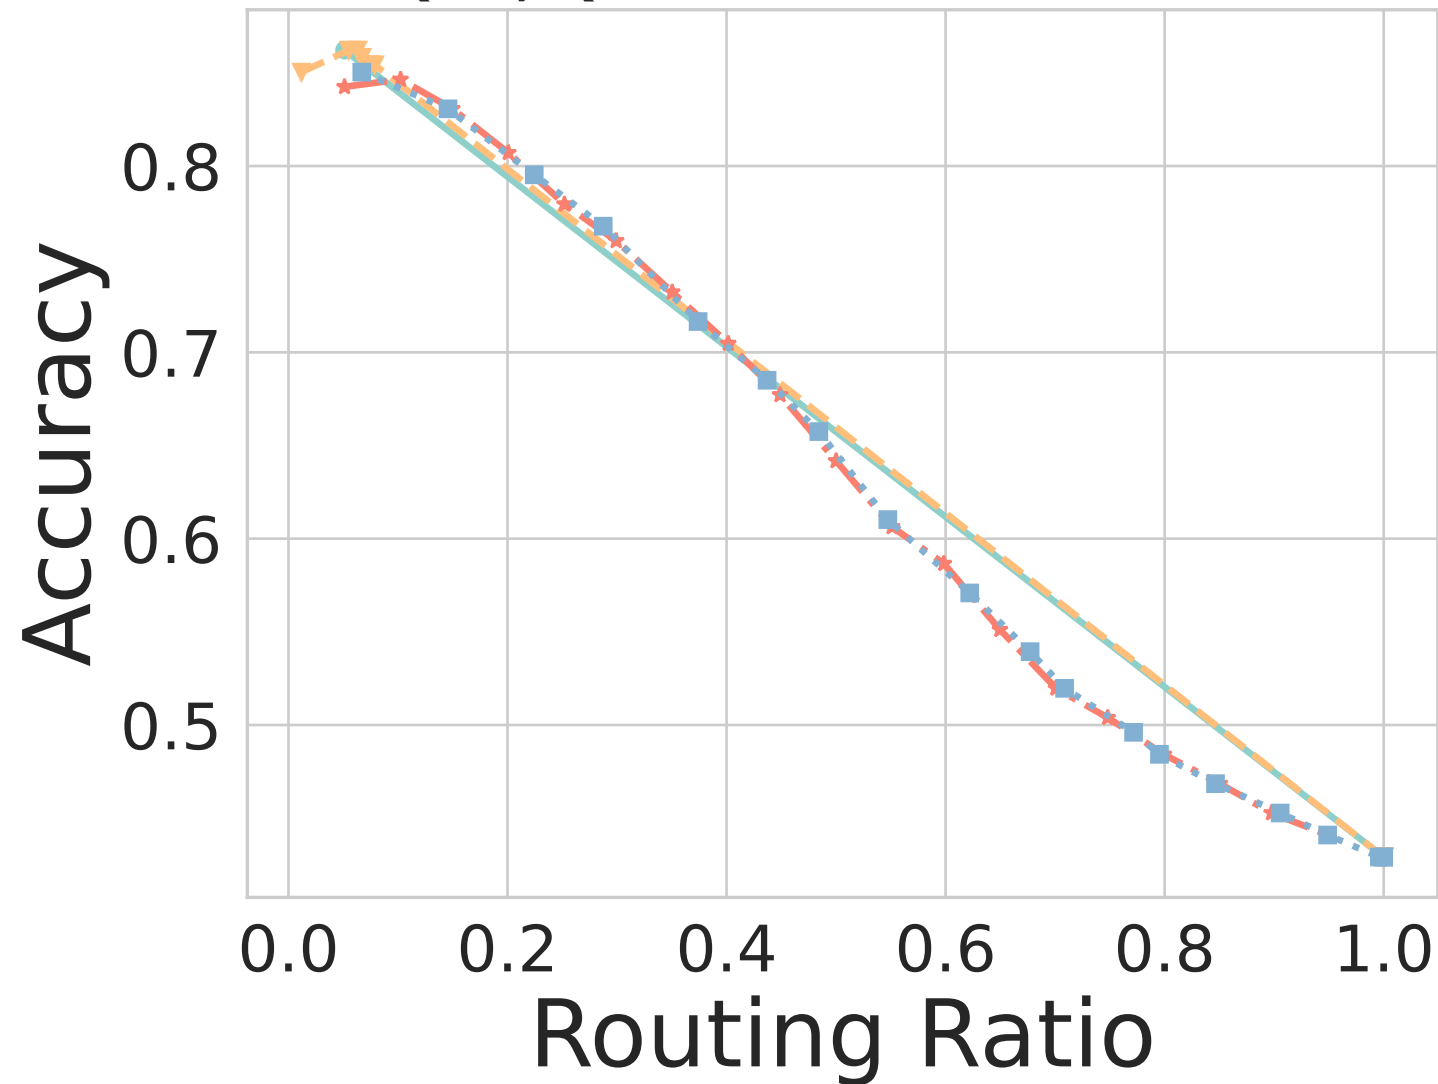

Supplement: supplementary_material [file cali_down_aqua_Qwen3-4B_gpt-4.1-mini.pdf › Routing_SLM_LLMs/Proxy_routing_prediction/to_gpt-4.1-mini/aqua_as_downstream/cali_down_aqua_Qwen3-4B_gpt-4.1-mini.pdf]

**AQuA, granite-3.1-8b to GPT-4.1 mini**

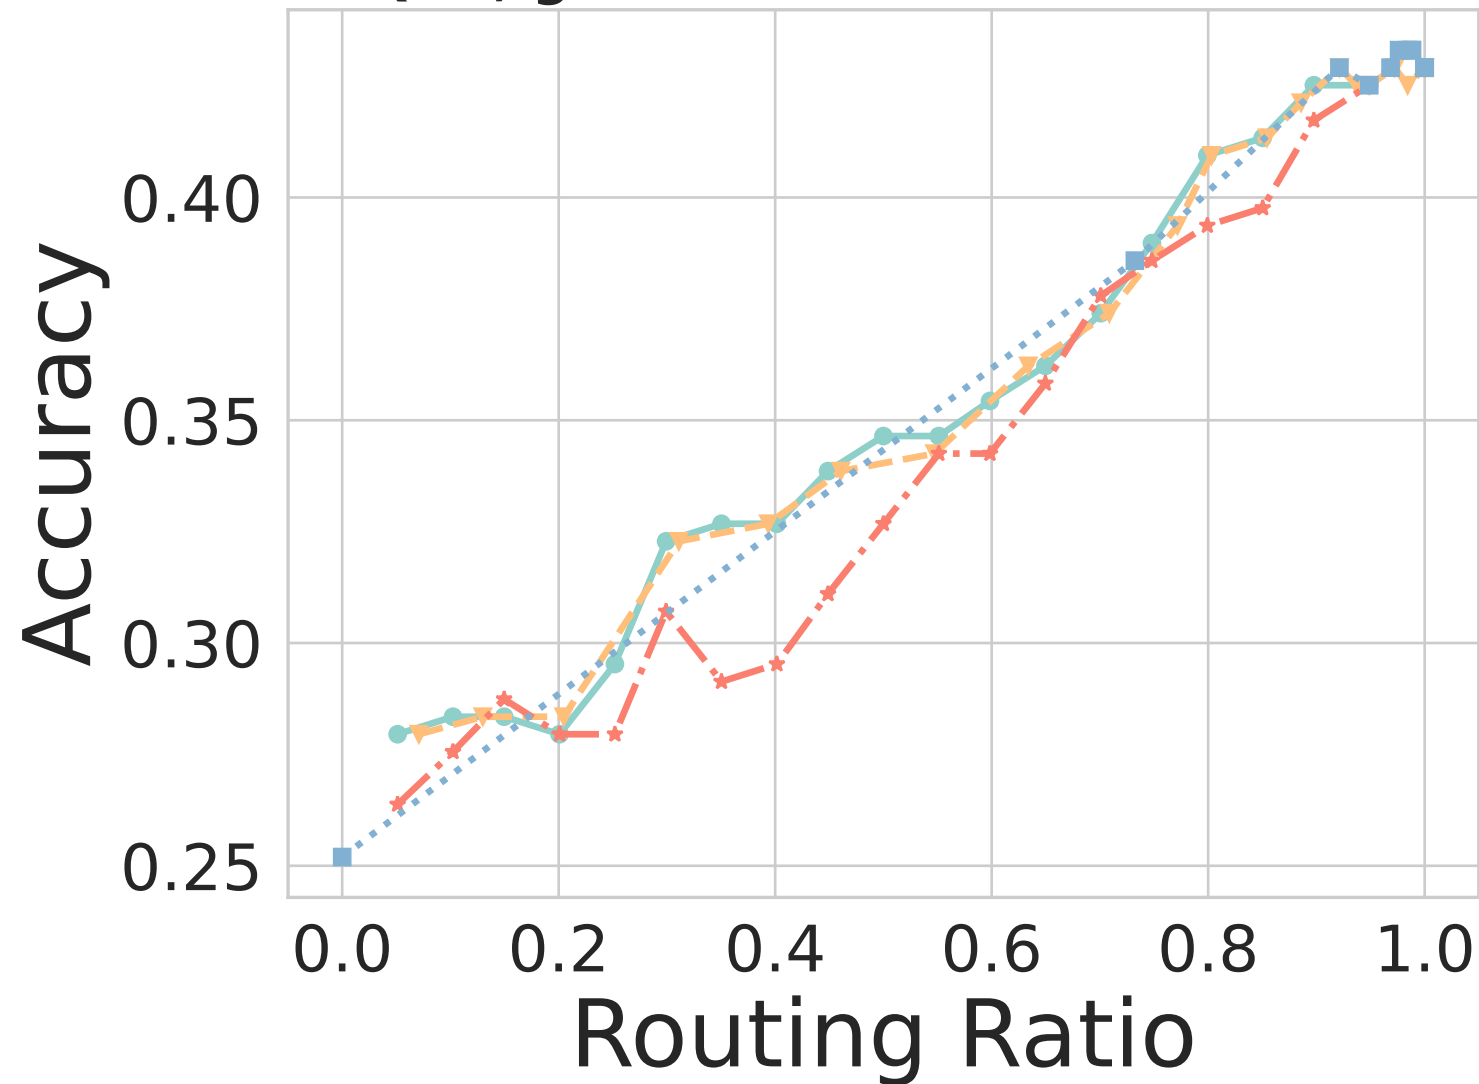

Supplement: supplementary_material [file cali_down_aqua_granite-3.1-8b_gpt-4.1-mini.pdf › Routing_SLM_LLMs/Proxy_routing_prediction/to_gpt-4.1-mini/aqua_as_downstream/cali_down_aqua_granite-3.1-8b_gpt-4.1-mini.pdf]

**AQuA, llama-3.1-8b to GPT-4.1 mini**

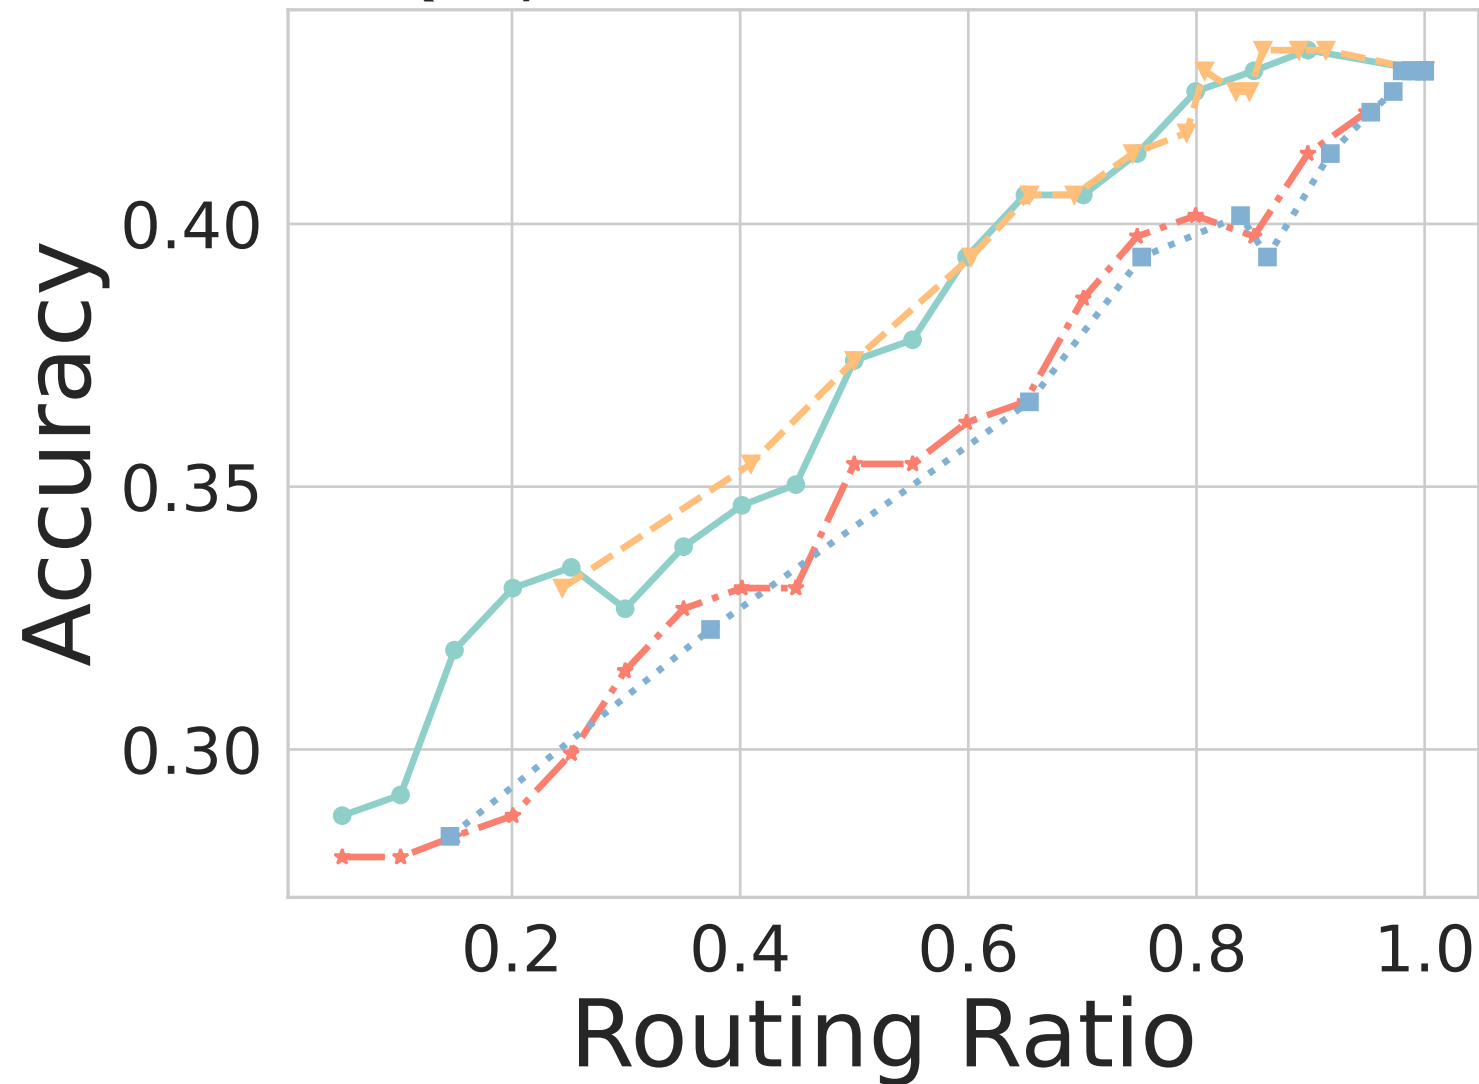

Supplement: supplementary_material [file cali_down_aqua_llama-3.1-8b_gpt-4.1-mini.pdf › Routing_SLM_LLMs/Proxy_routing_prediction/to_gpt-4.1-mini/aqua_as_downstream/cali_down_aqua_llama-3.1-8b_gpt-4.1-mini.pdf]

**AQuA, llama-3.2-1b to GPT-4.1 mini**

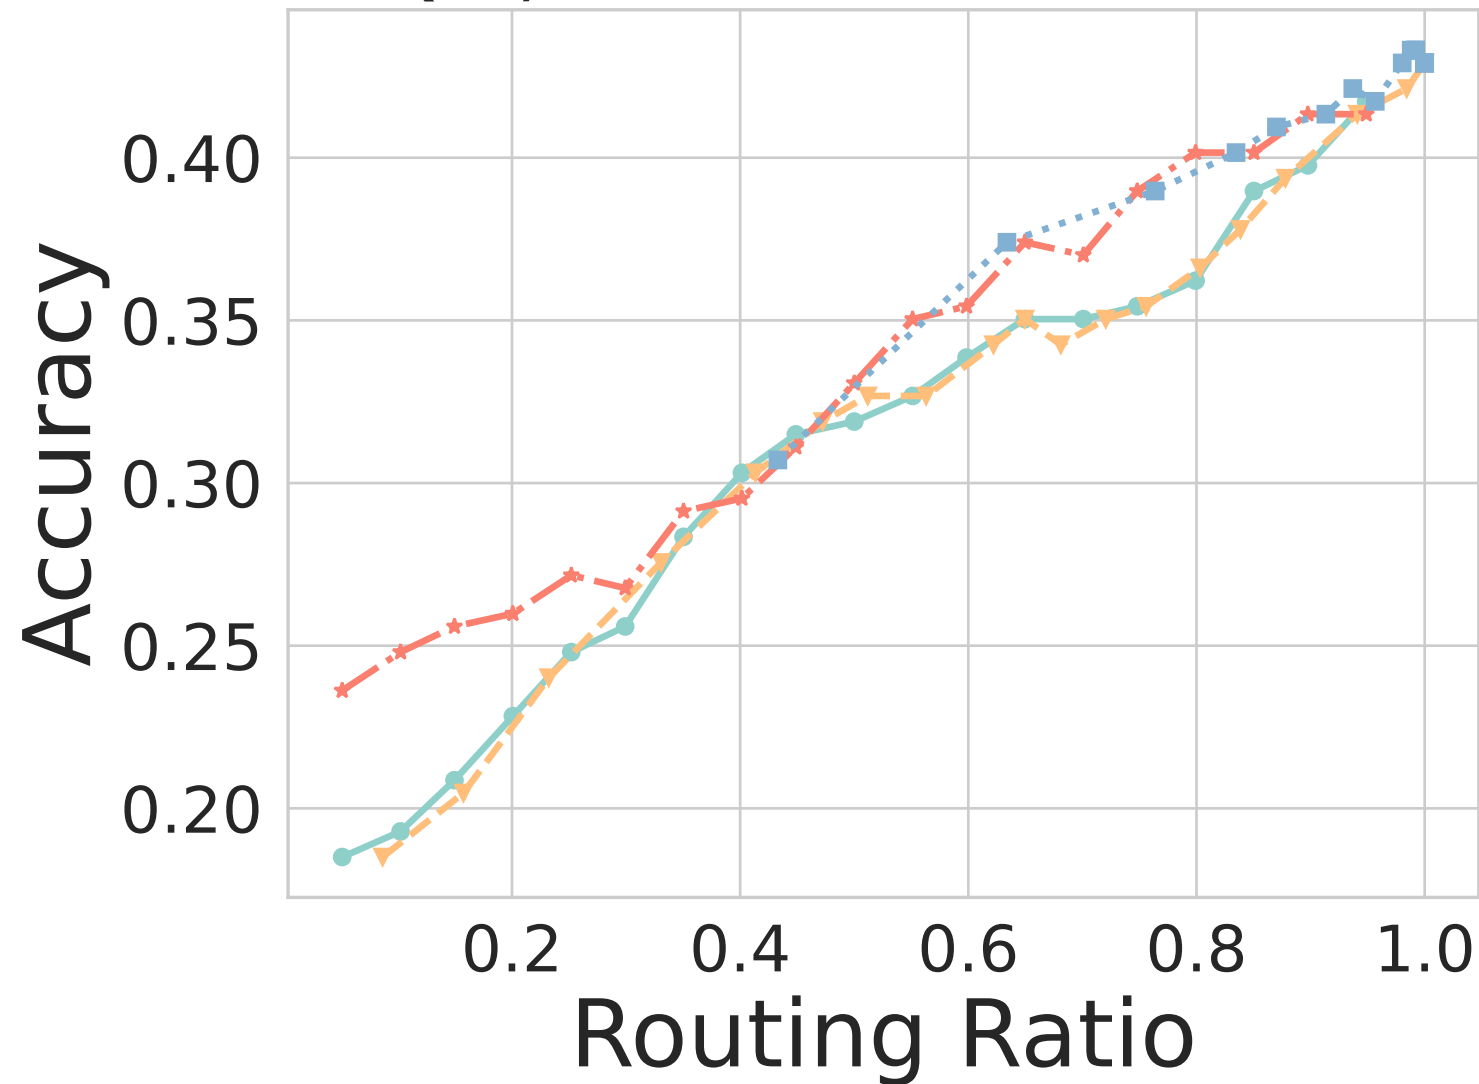

Supplement: supplementary_material [file cali_down_aqua_llama-3.2-1b_gpt-4.1-mini.pdf › Routing_SLM_LLMs/Proxy_routing_prediction/to_gpt-4.1-mini/aqua_as_downstream/cali_down_aqua_llama-3.2-1b_gpt-4.1-mini.pdf]

**AQuA, llama-3.2-3b to GPT-4.1 mini**

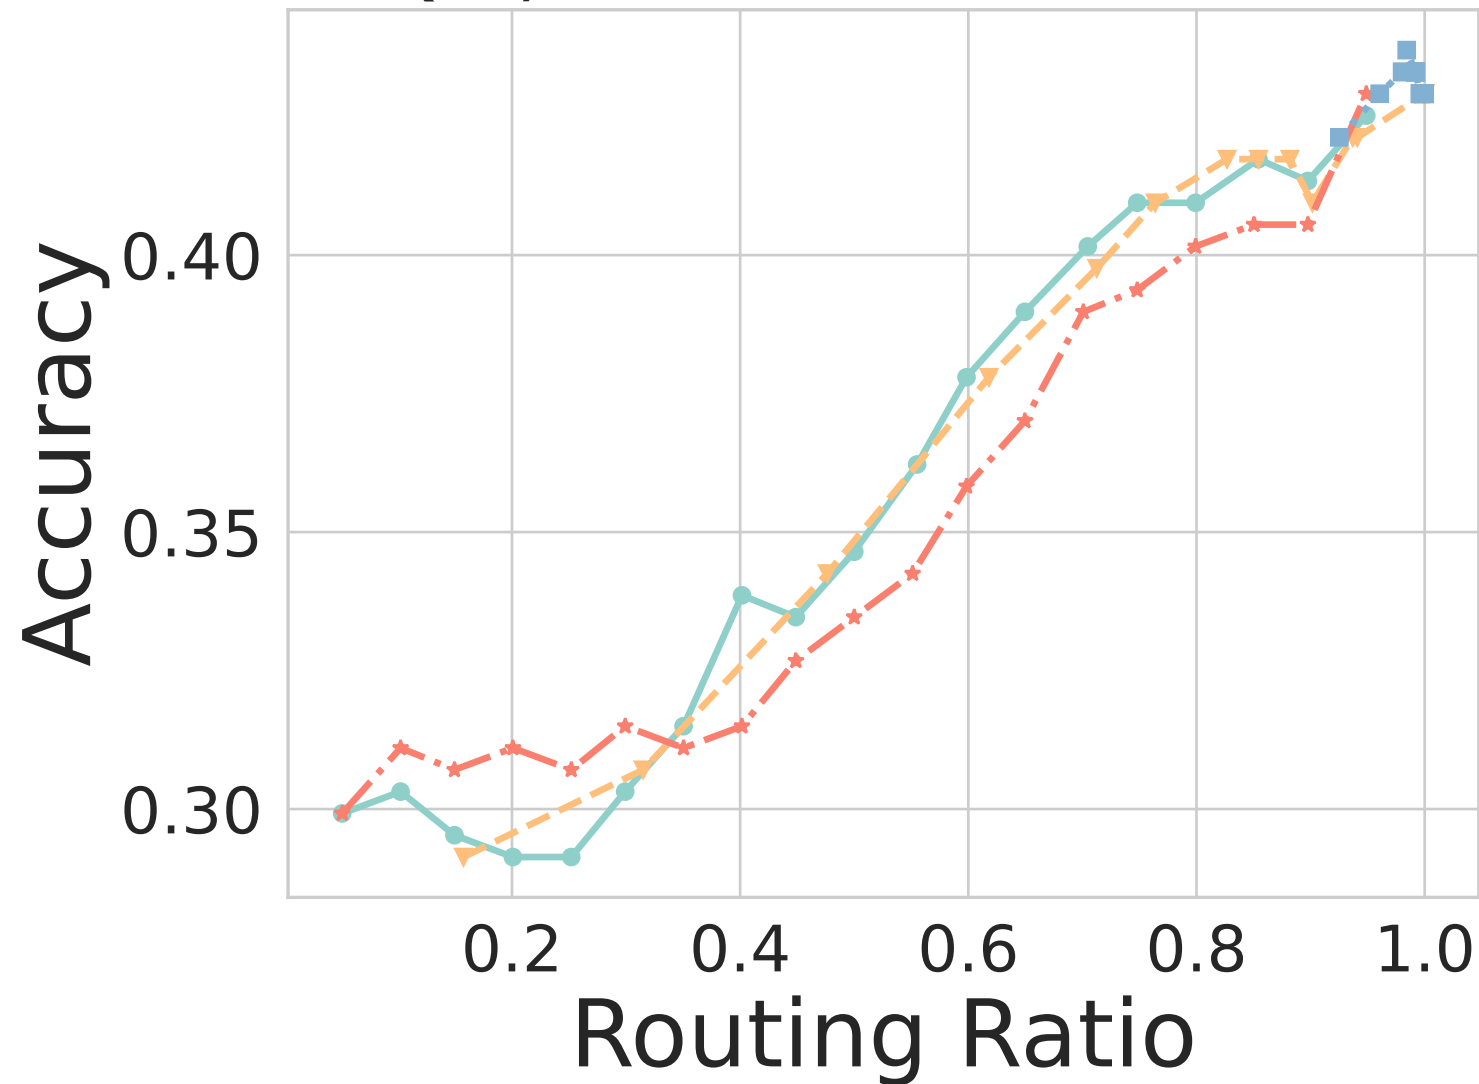

Supplement: supplementary_material [file cali_down_aqua_llama-3.2-3b_gpt-4.1-mini.pdf › Routing_SLM_LLMs/Proxy_routing_prediction/to_gpt-4.1-mini/aqua_as_downstream/cali_down_aqua_llama-3.2-3b_gpt-4.1-mini.pdf]

**AQuA, mistral-7b to GPT-4.1 mini**

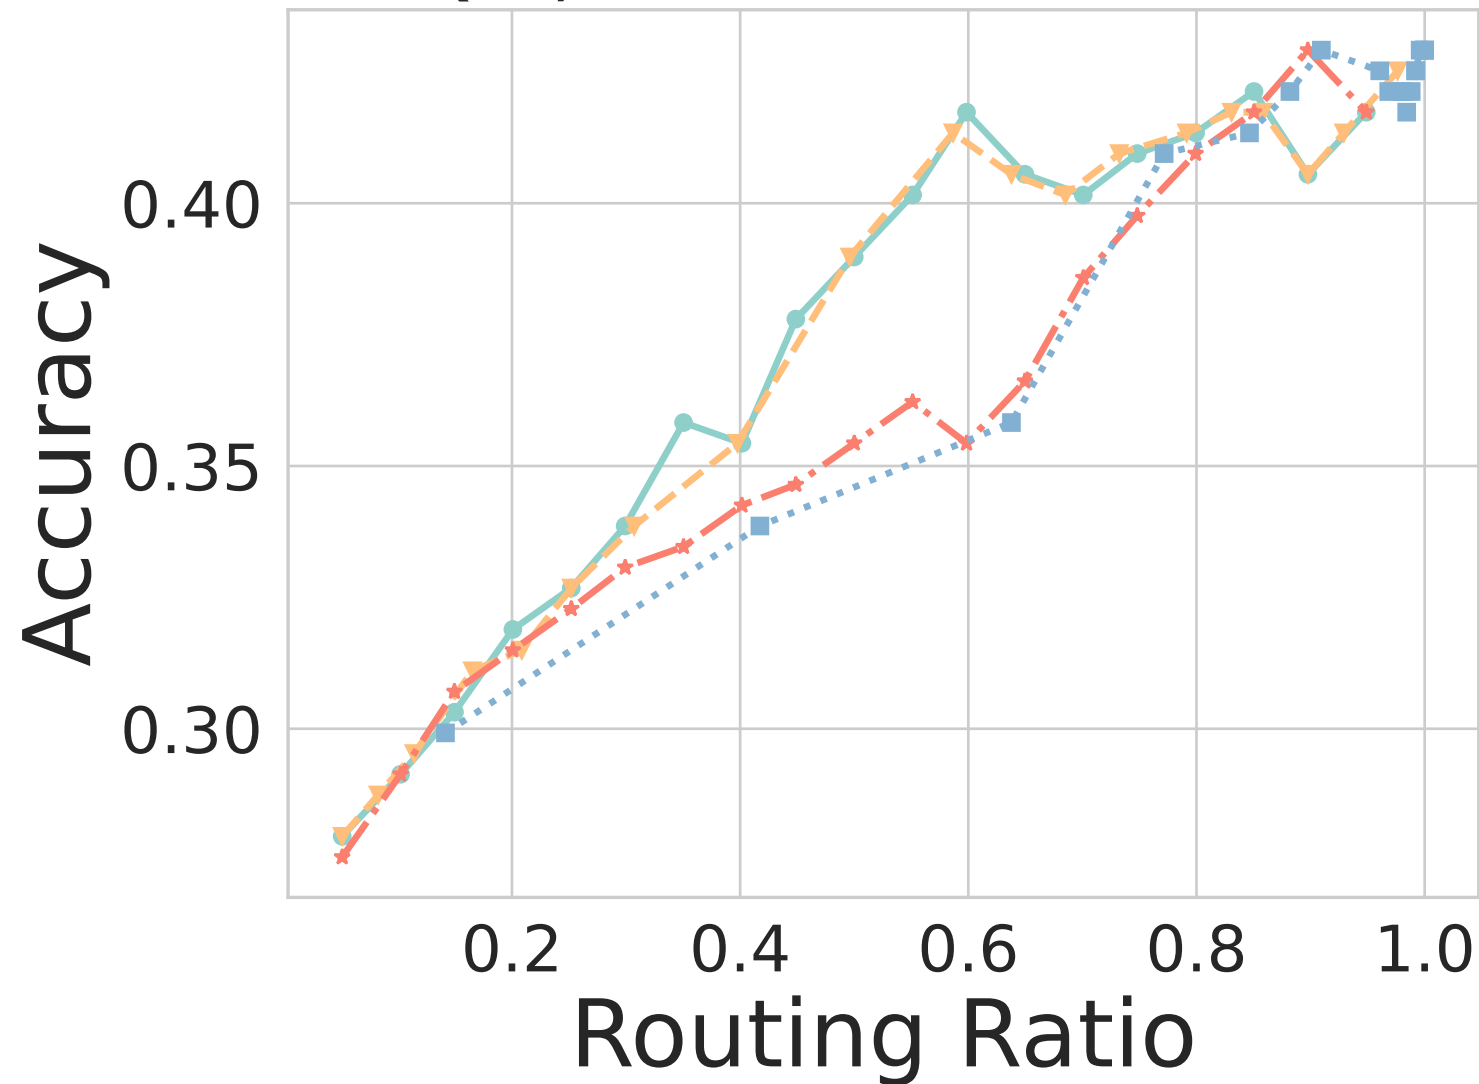

Supplement: supplementary_material [file cali_down_aqua_mistral-7b_gpt-4.1-mini.pdf › Routing_SLM_LLMs/Proxy_routing_prediction/to_gpt-4.1-mini/aqua_as_downstream/cali_down_aqua_mistral-7b_gpt-4.1-mini.pdf]

**AQuA, phi-3.5-mini to GPT-4.1 mini**

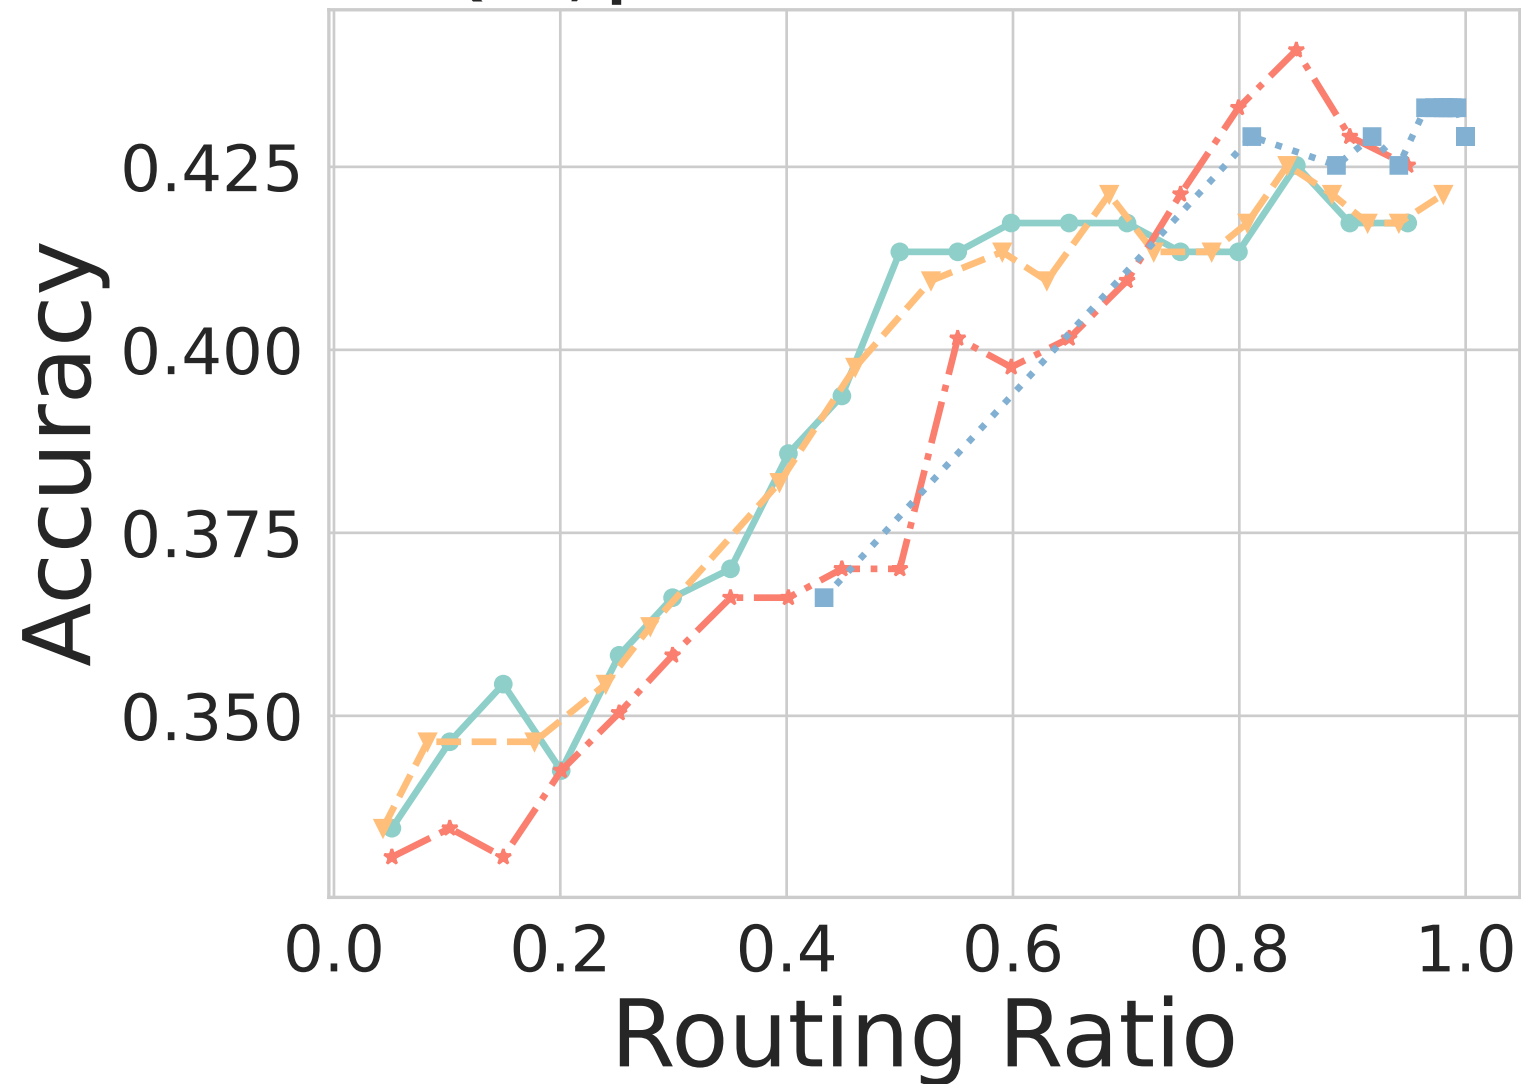

Supplement: supplementary_material [file cali_down_aqua_phi-3.5-mini_gpt-4.1-mini.pdf › Routing_SLM_LLMs/Proxy_routing_prediction/to_gpt-4.1-mini/aqua_as_downstream/cali_down_aqua_phi-3.5-mini_gpt-4.1-mini.pdf]

**AQuA, phi-4-mini-reasoning to GPT-4.1 mini**

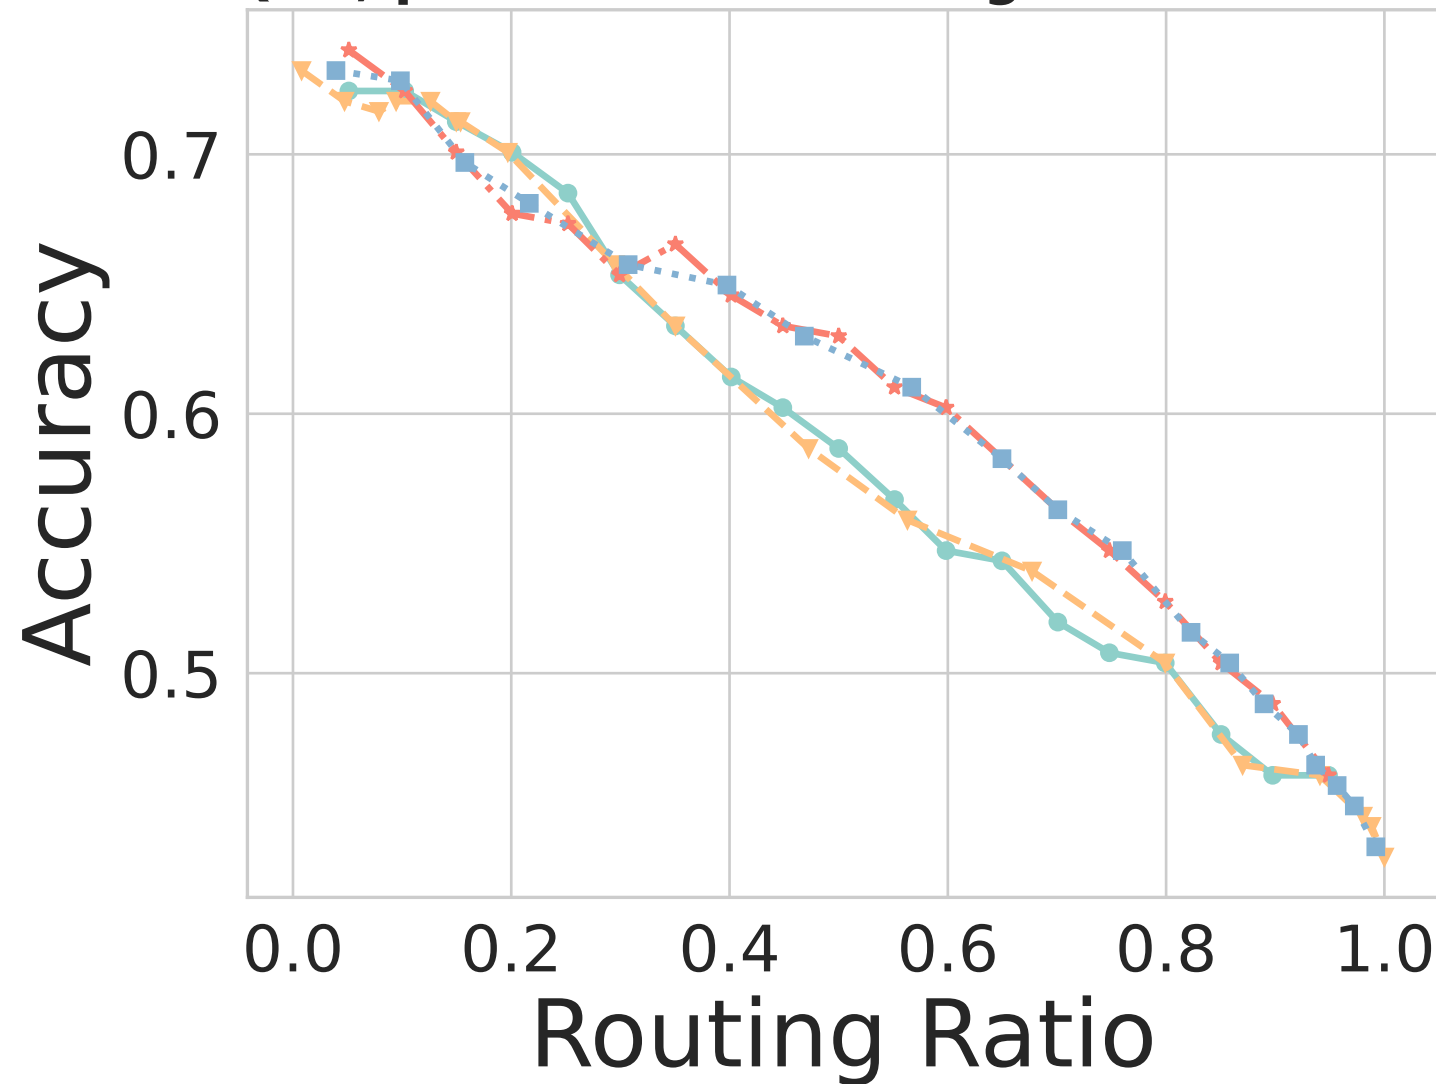

Supplement: supplementary_material [file cali_down_aqua_phi-4-mini-reasoning_gpt-4.1-mini.pdf › Routing_SLM_LLMs/Proxy_routing_prediction/to_gpt-4.1-mini/aqua_as_downstream/cali_down_aqua_phi-4-mini-reasoning_gpt-4.1-mini.pdf]

**AQuA, qwen-2.5-7b to GPT-4.1 mini**

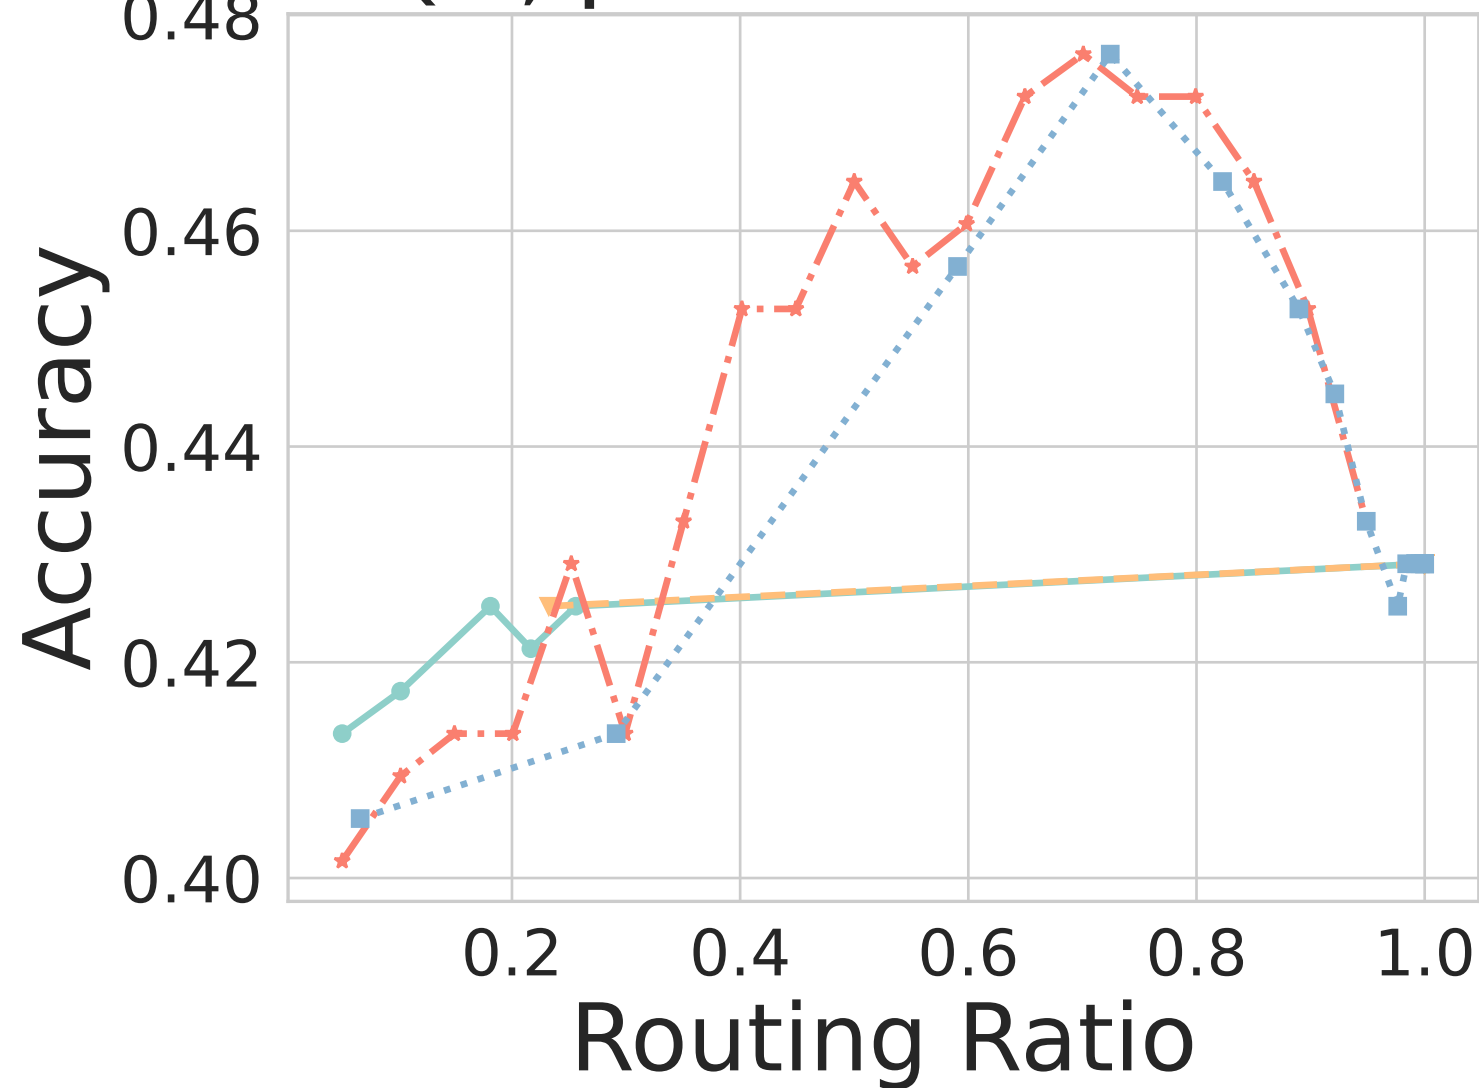

Supplement: supplementary_material [file cali_down_aqua_qwen-2.5-7b_gpt-4.1-mini.pdf › Routing_SLM_LLMs/Proxy_routing_prediction/to_gpt-4.1-mini/aqua_as_downstream/cali_down_aqua_qwen-2.5-7b_gpt-4.1-mini.pdf]

**AQuA, rwkv to GPT-4.1 mini**

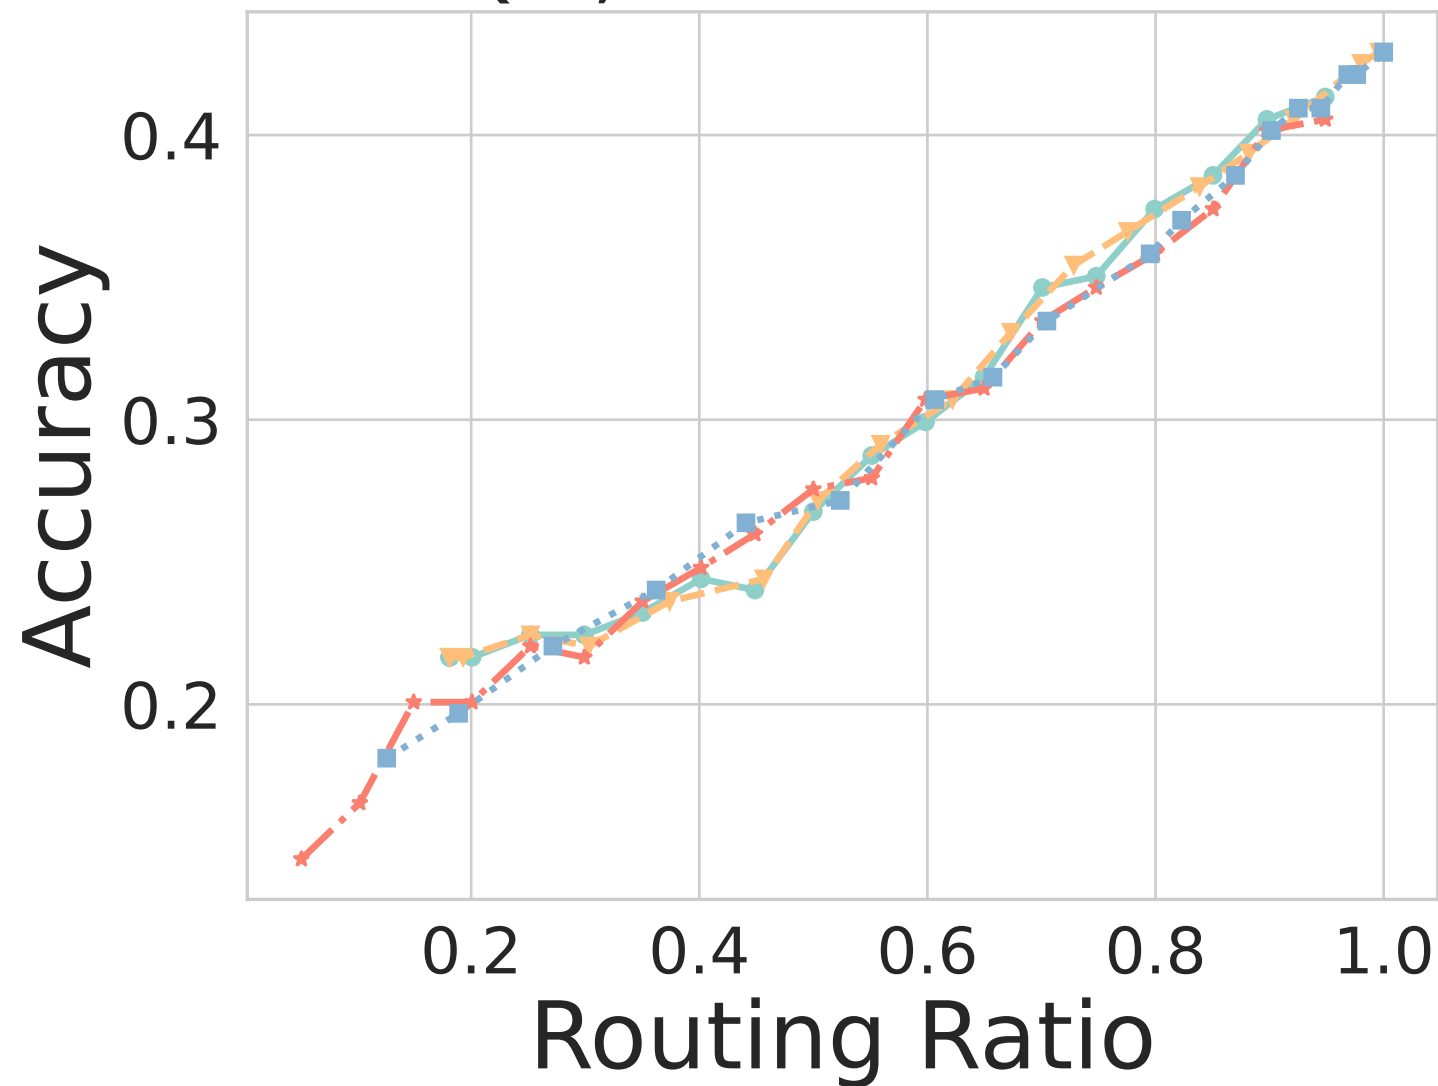

Supplement: supplementary_material [file cali_down_aqua_rwkv_gpt-4.1-mini.pdf › Routing_SLM_LLMs/Proxy_routing_prediction/to_gpt-4.1-mini/aqua_as_downstream/cali_down_aqua_rwkv_gpt-4.1-mini.pdf]

**BoolQ, Qwen3-0.6B to GPT-4.1 mini**

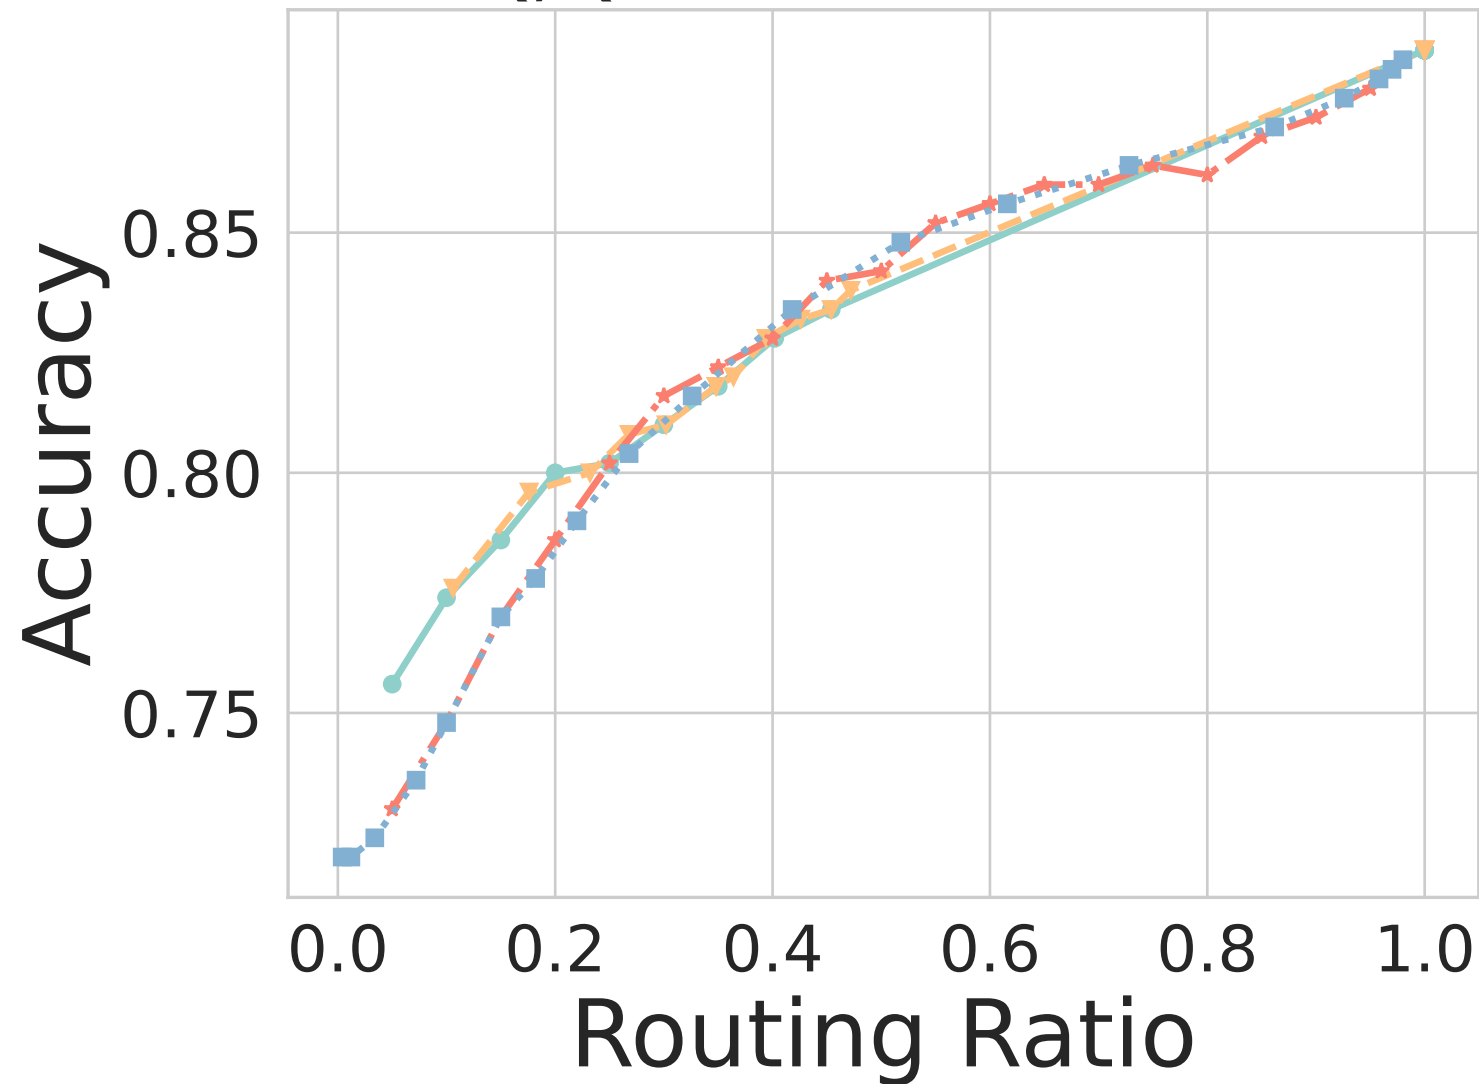

Supplement: supplementary_material [file cali_down_boolq_Qwen3-0.6B_gpt-4.1-mini.pdf › Routing_SLM_LLMs/Proxy_routing_prediction/to_gpt-4.1-mini/boolq_as_downstream/cali_down_boolq_Qwen3-0.6B_gpt-4.1-mini.pdf]

**BoolQ, Qwen3-1.7B to GPT-4.1 mini**

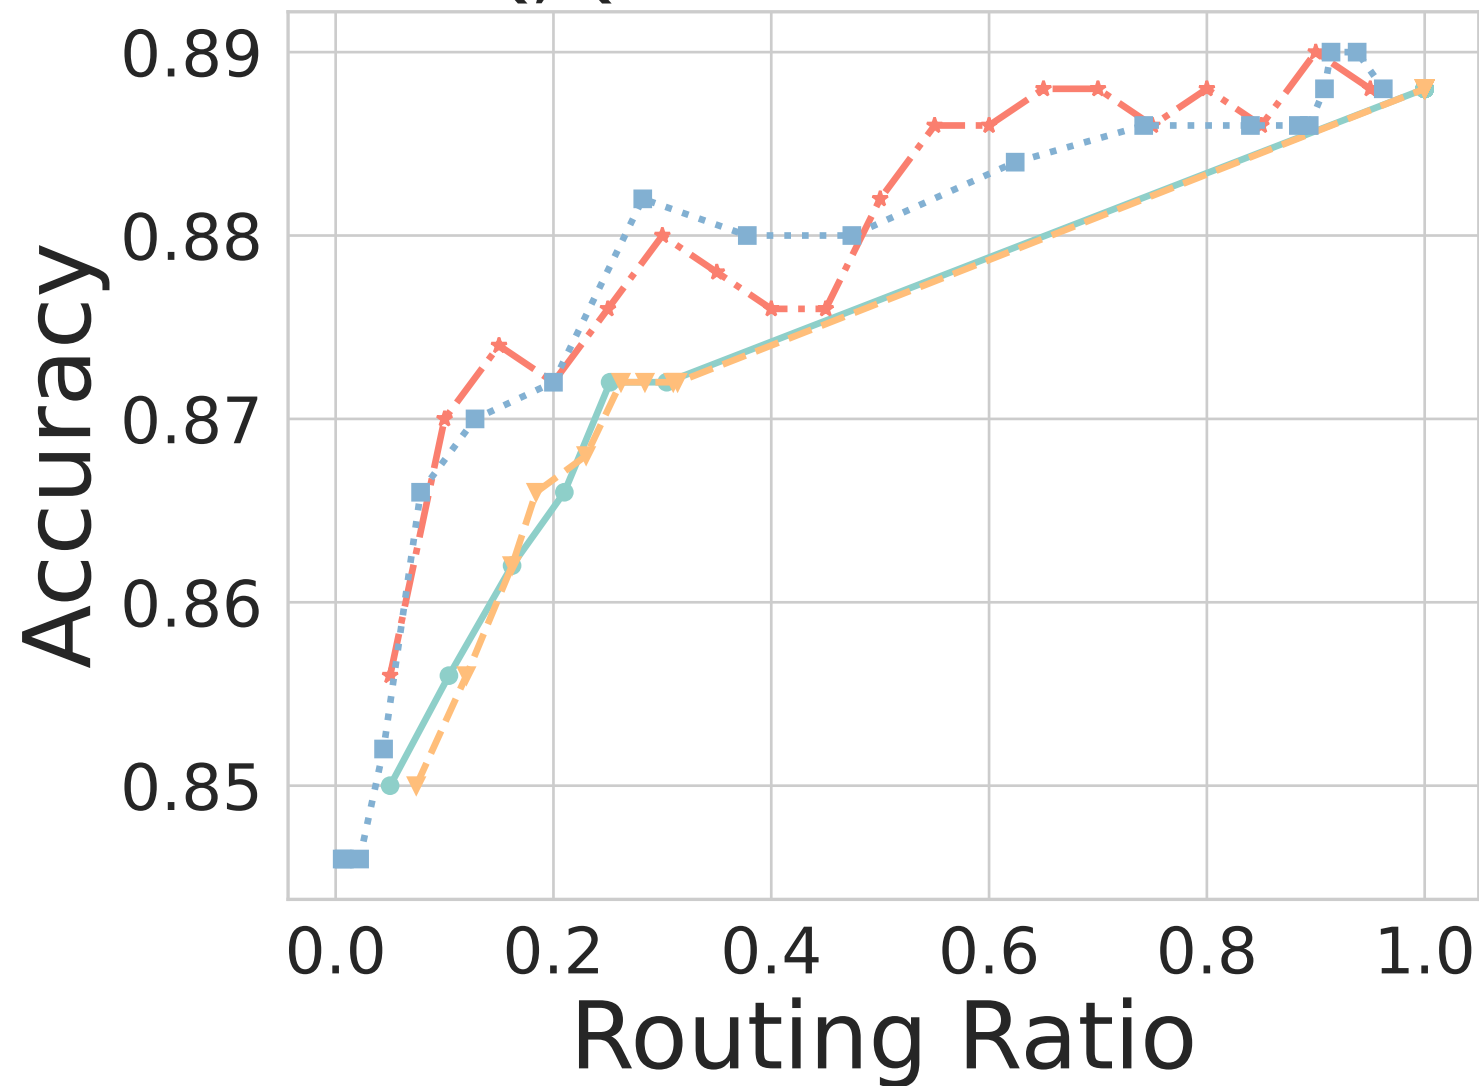

Supplement: supplementary_material [file cali_down_boolq_Qwen3-1.7B_gpt-4.1-mini.pdf › Routing_SLM_LLMs/Proxy_routing_prediction/to_gpt-4.1-mini/boolq_as_downstream/cali_down_boolq_Qwen3-1.7B_gpt-4.1-mini.pdf]

**BoolQ, Qwen3-4B to GPT-4.1 mini**

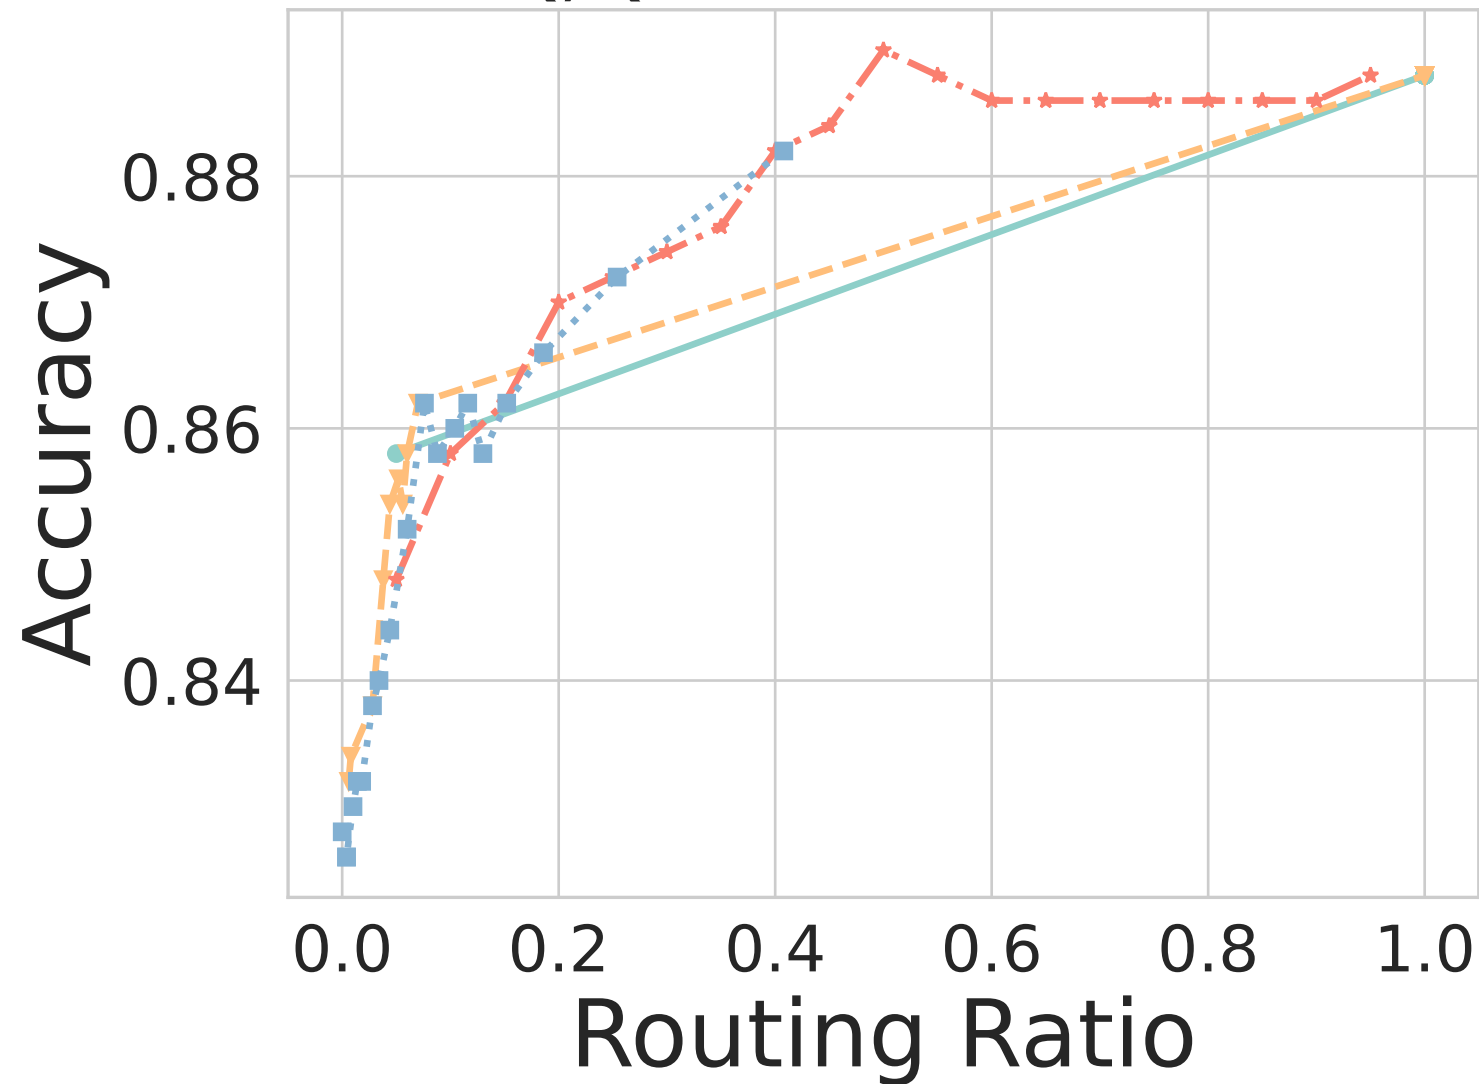

Supplement: supplementary_material [file cali_down_boolq_Qwen3-4B_gpt-4.1-mini.pdf › Routing_SLM_LLMs/Proxy_routing_prediction/to_gpt-4.1-mini/boolq_as_downstream/cali_down_boolq_Qwen3-4B_gpt-4.1-mini.pdf]

**BoolQ, granite-3.1-8b to GPT-4.1 mini**

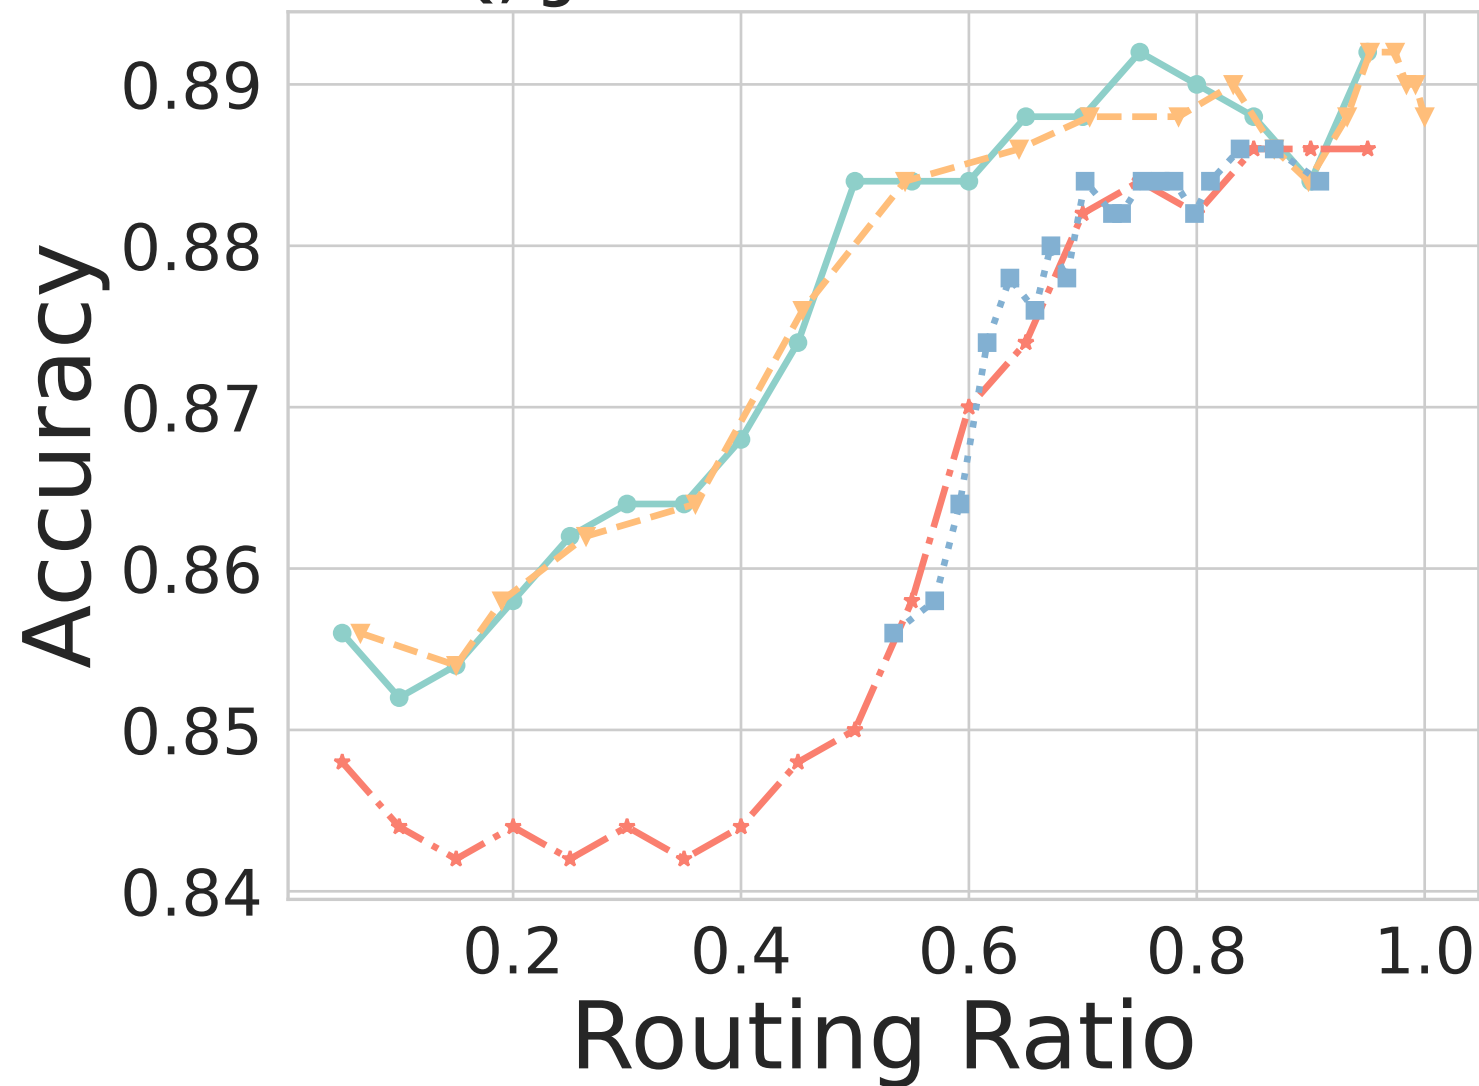

Supplement: supplementary_material [file cali_down_boolq_granite-3.1-8b_gpt-4.1-mini.pdf › Routing_SLM_LLMs/Proxy_routing_prediction/to_gpt-4.1-mini/boolq_as_downstream/cali_down_boolq_granite-3.1-8b_gpt-4.1-mini.pdf]

**BoolQ, llama-3.1-8b to GPT-4.1 mini**

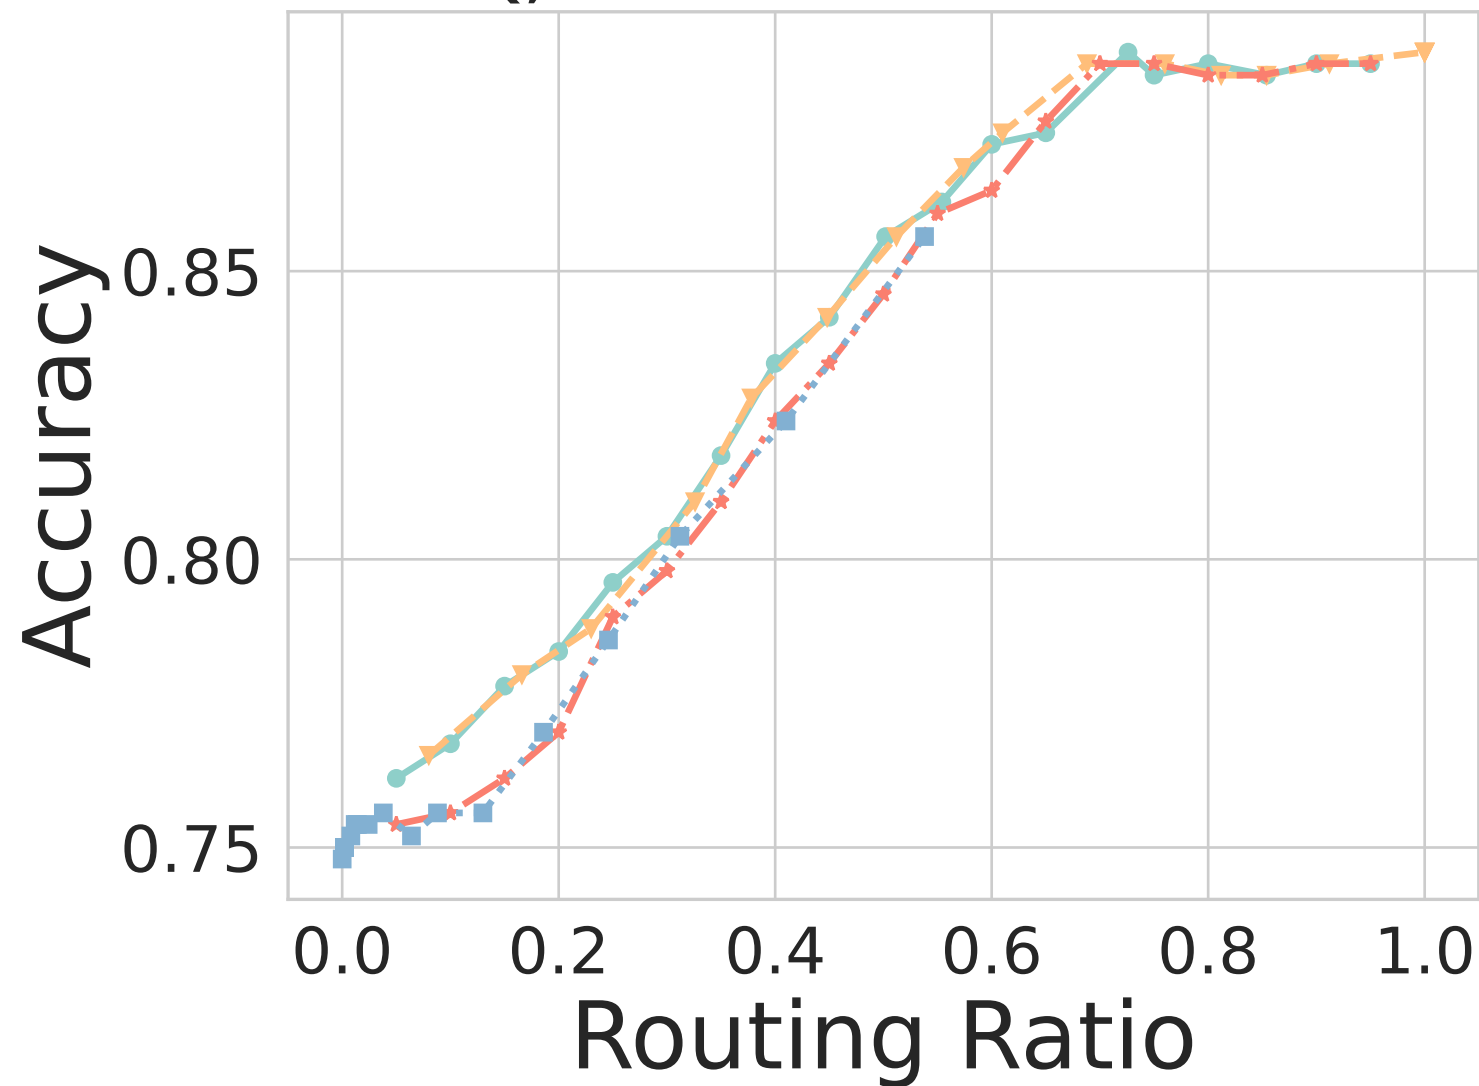

Supplement: supplementary_material [file cali_down_boolq_llama-3.1-8b_gpt-4.1-mini.pdf › Routing_SLM_LLMs/Proxy_routing_prediction/to_gpt-4.1-mini/boolq_as_downstream/cali_down_boolq_llama-3.1-8b_gpt-4.1-mini.pdf]

**BoolQ, llama-3.2-1b to GPT-4.1 mini**

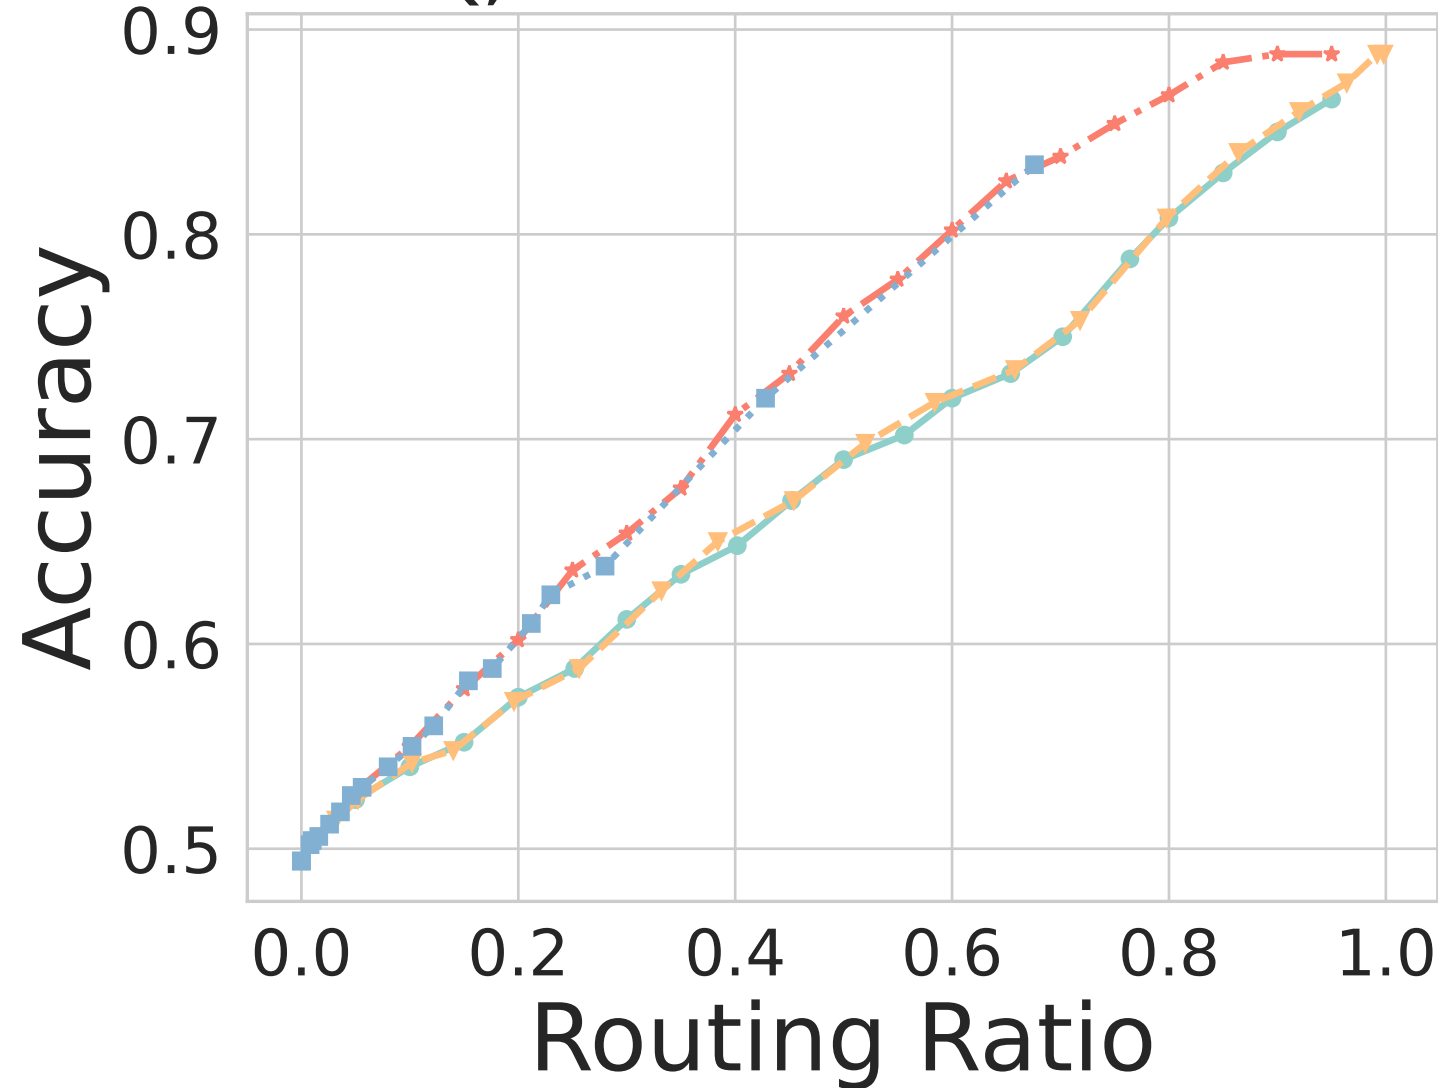

Supplement: supplementary_material [file cali_down_boolq_llama-3.2-1b_gpt-4.1-mini.pdf › Routing_SLM_LLMs/Proxy_routing_prediction/to_gpt-4.1-mini/boolq_as_downstream/cali_down_boolq_llama-3.2-1b_gpt-4.1-mini.pdf]

**BoolQ, llama-3.2-3b to GPT-4.1 mini**

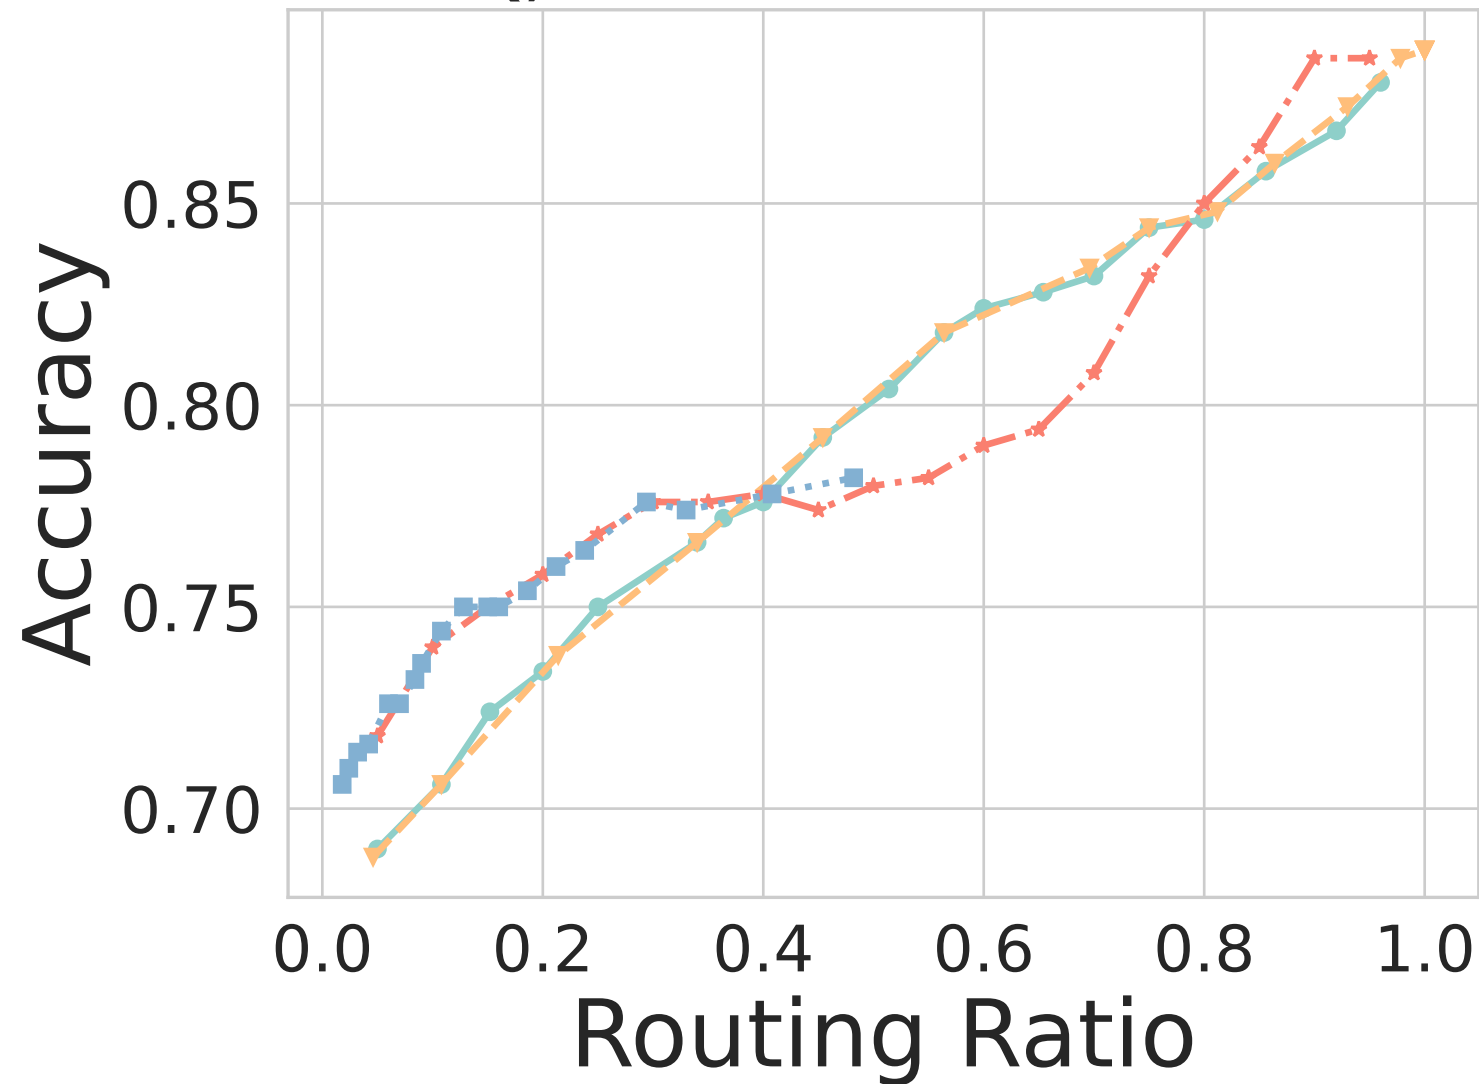

Supplement: supplementary_material [file cali_down_boolq_llama-3.2-3b_gpt-4.1-mini.pdf › Routing_SLM_LLMs/Proxy_routing_prediction/to_gpt-4.1-mini/boolq_as_downstream/cali_down_boolq_llama-3.2-3b_gpt-4.1-mini.pdf]

**BoolQ, mistral-7b to GPT-4.1 mini**

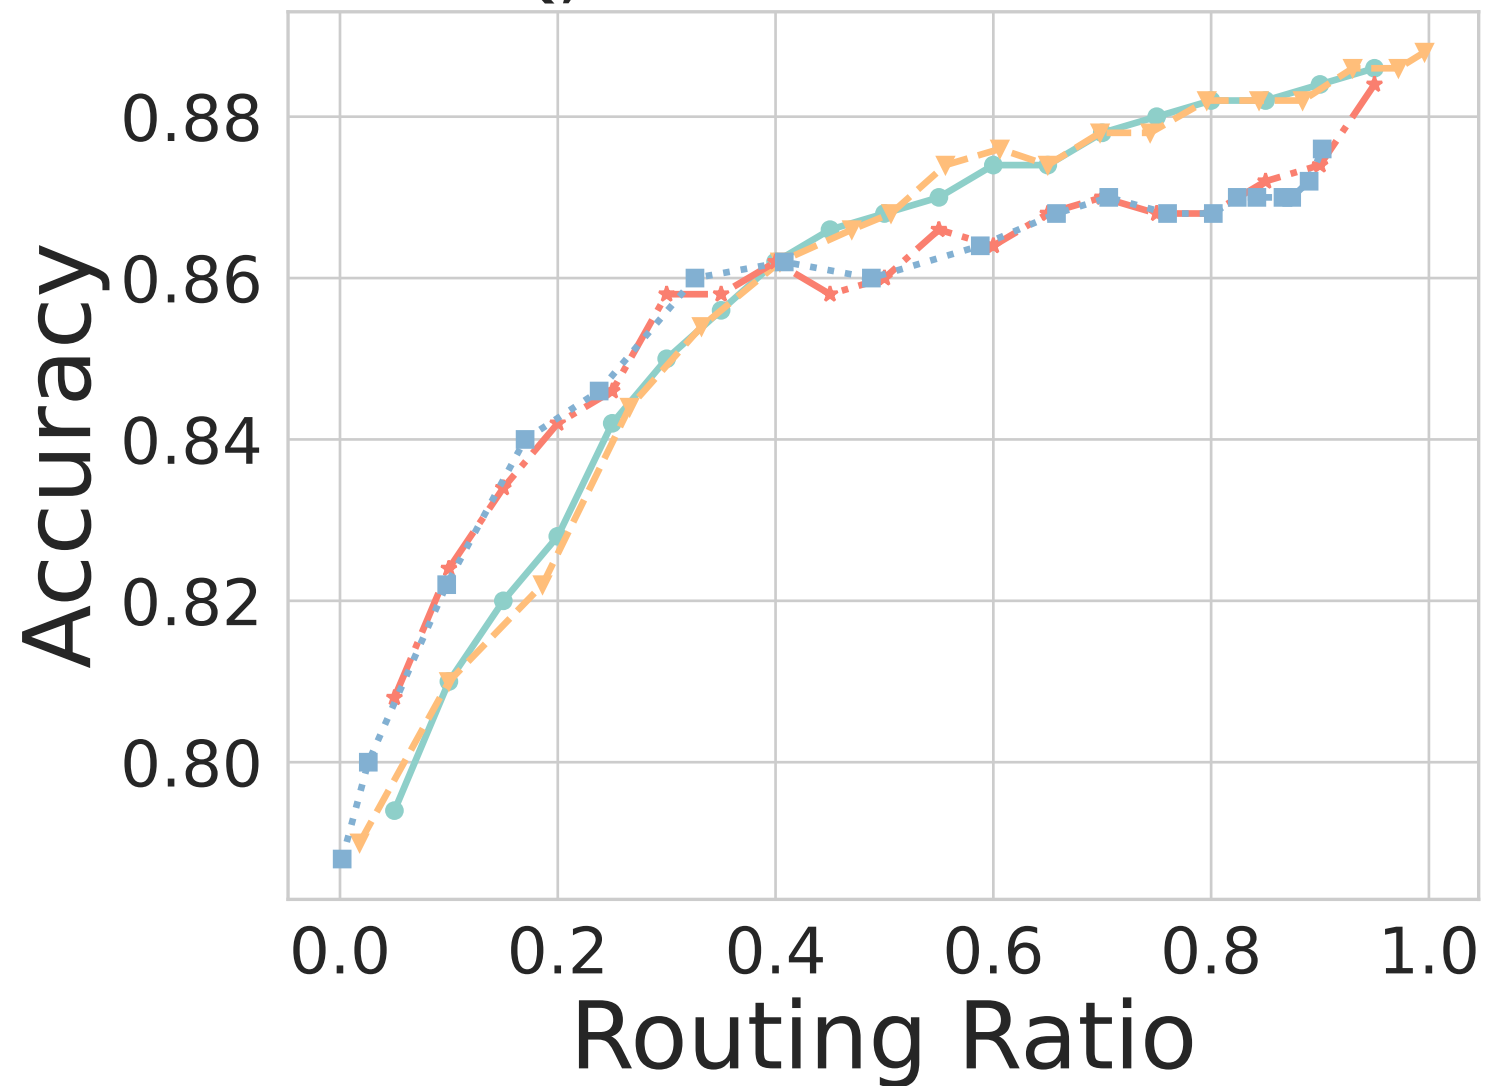

Supplement: supplementary_material [file cali_down_boolq_mistral-7b_gpt-4.1-mini.pdf › Routing_SLM_LLMs/Proxy_routing_prediction/to_gpt-4.1-mini/boolq_as_downstream/cali_down_boolq_mistral-7b_gpt-4.1-mini.pdf]

**BoolQ, phi-3.5-mini to GPT-4.1 mini**

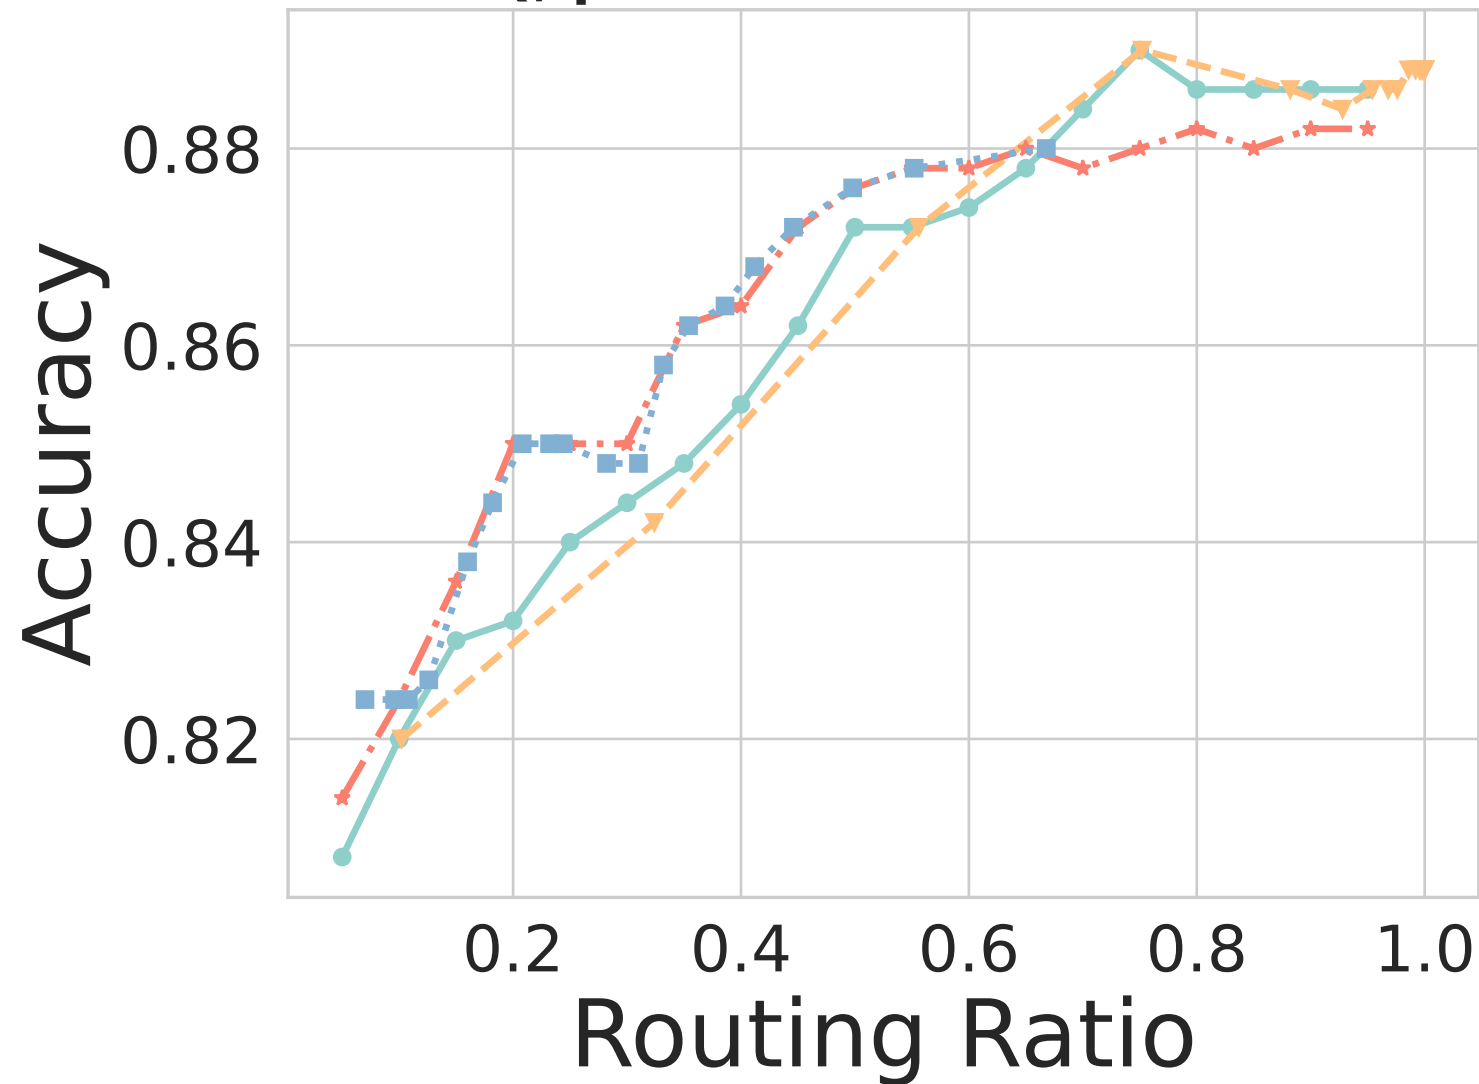

Supplement: supplementary_material [file cali_down_boolq_phi-3.5-mini_gpt-4.1-mini.pdf › Routing_SLM_LLMs/Proxy_routing_prediction/to_gpt-4.1-mini/boolq_as_downstream/cali_down_boolq_phi-3.5-mini_gpt-4.1-mini.pdf]

**BoolQ, phi-4-mini-reasoning to GPT-4.1 mini**

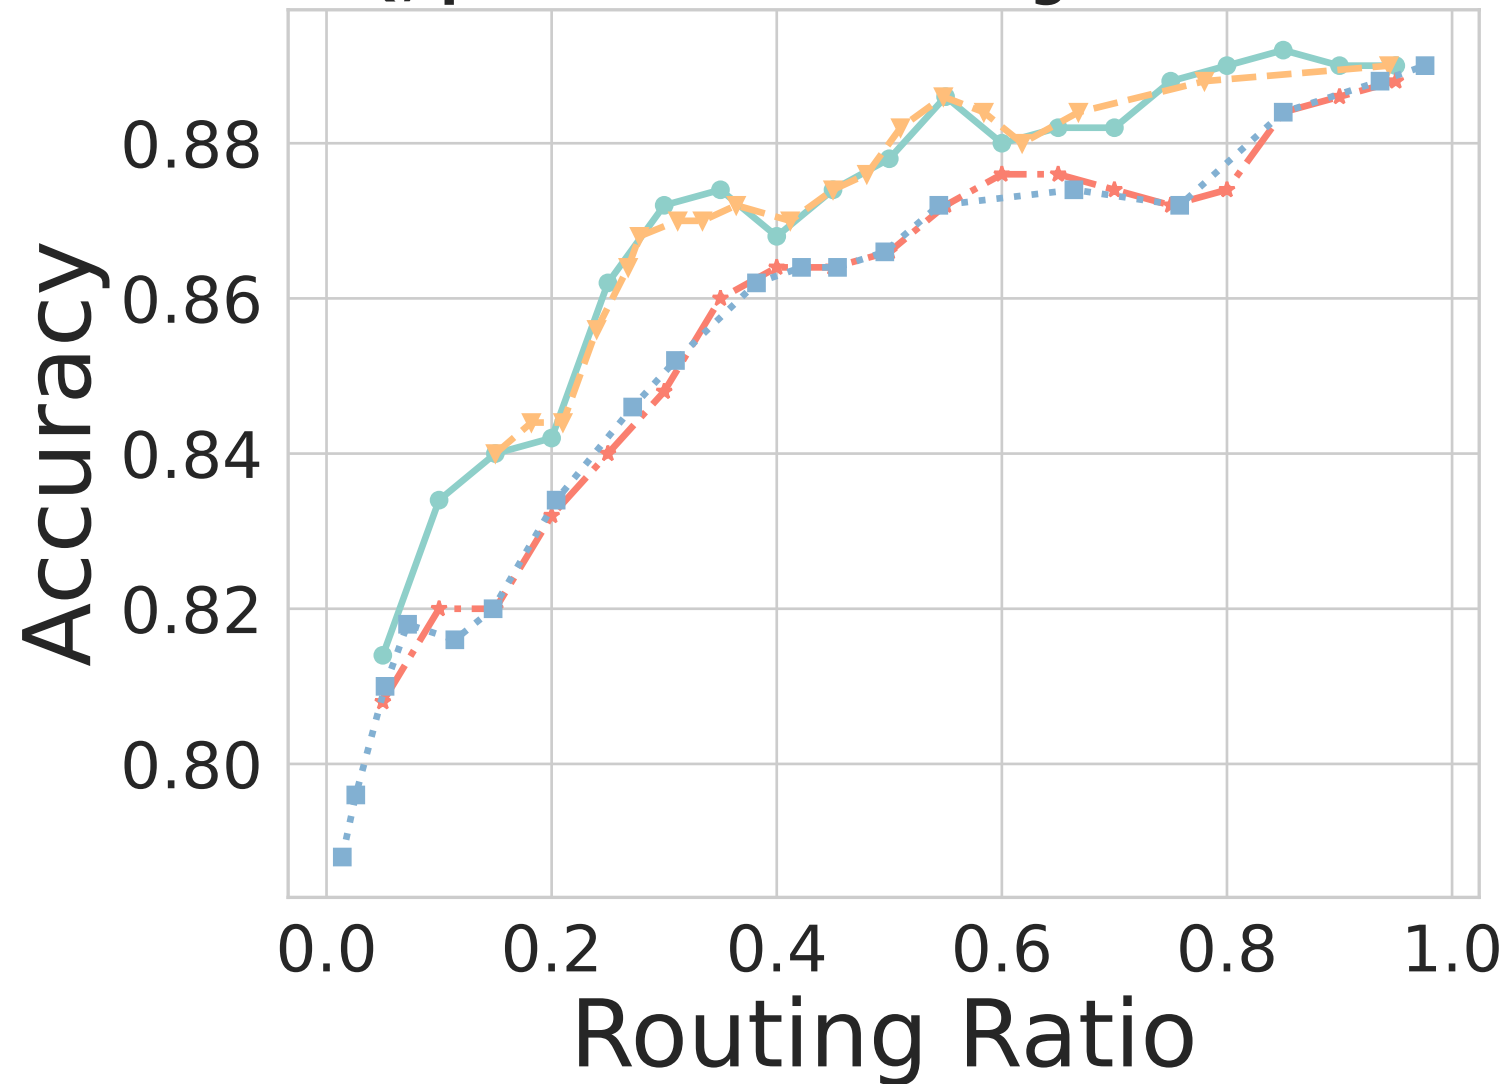

Supplement: supplementary_material [file cali_down_boolq_phi-4-mini-reasoning_gpt-4.1-mini.pdf › Routing_SLM_LLMs/Proxy_routing_prediction/to_gpt-4.1-mini/boolq_as_downstream/cali_down_boolq_phi-4-mini-reasoning_gpt-4.1-mini.pdf]

**BoolQ, qwen-2.5-7b to GPT-4.1 mini**

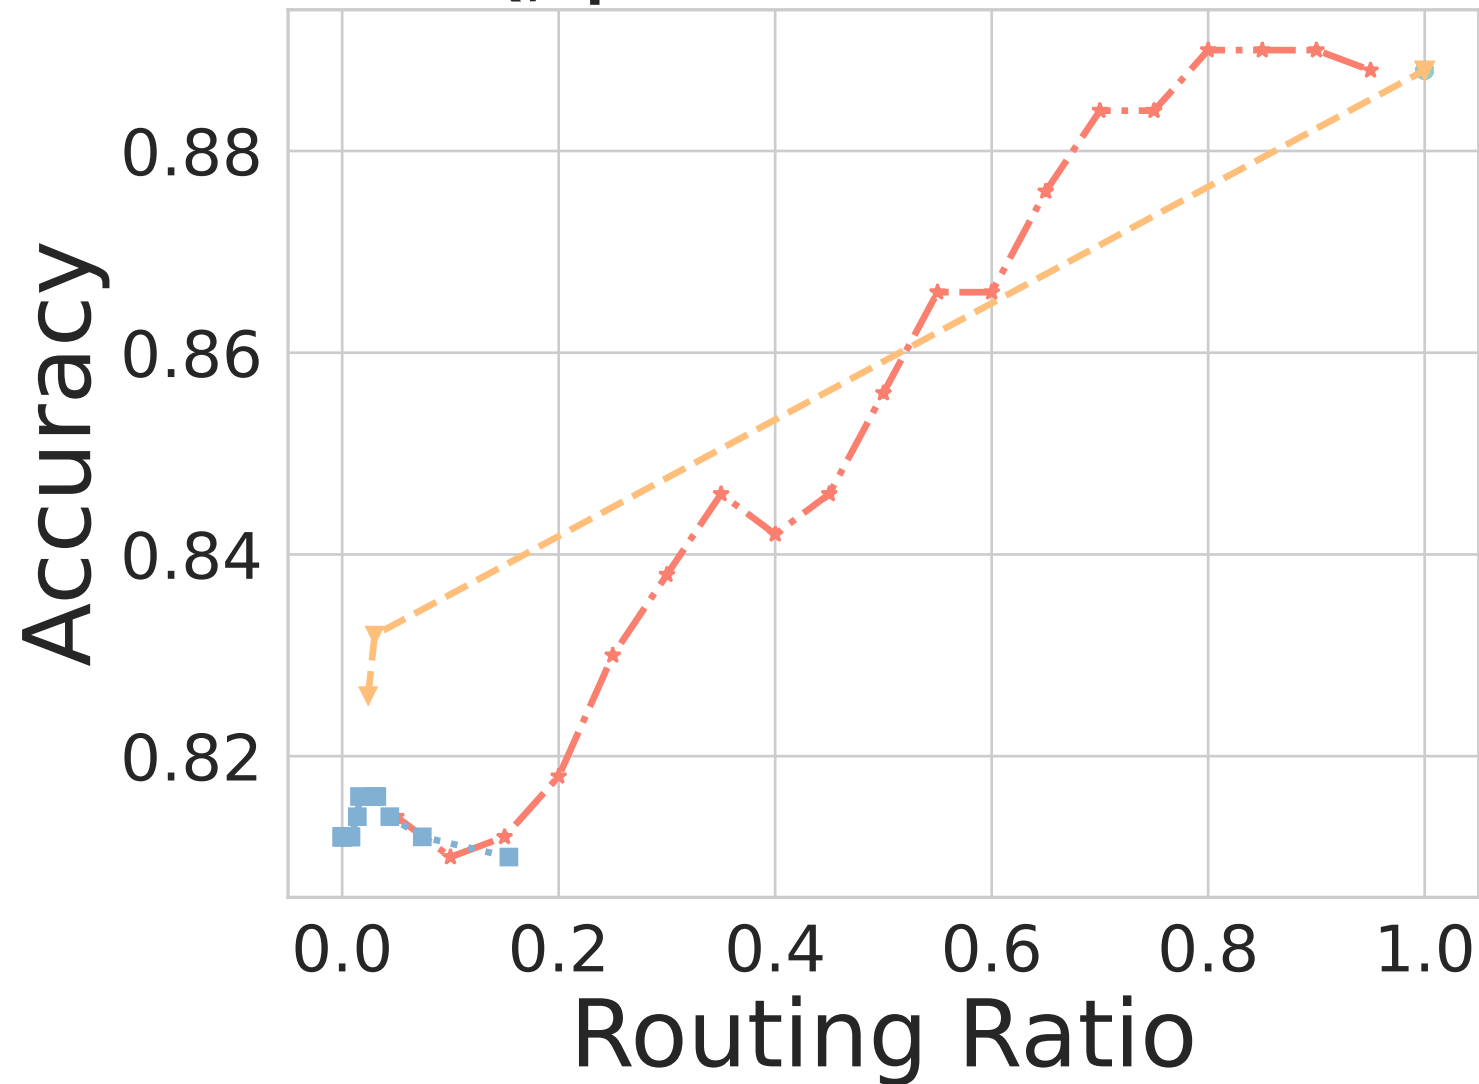

Supplement: supplementary_material [file cali_down_boolq_qwen-2.5-7b_gpt-4.1-mini.pdf › Routing_SLM_LLMs/Proxy_routing_prediction/to_gpt-4.1-mini/boolq_as_downstream/cali_down_boolq_qwen-2.5-7b_gpt-4.1-mini.pdf]

**BoolQ, rwkv to GPT-4.1 mini**

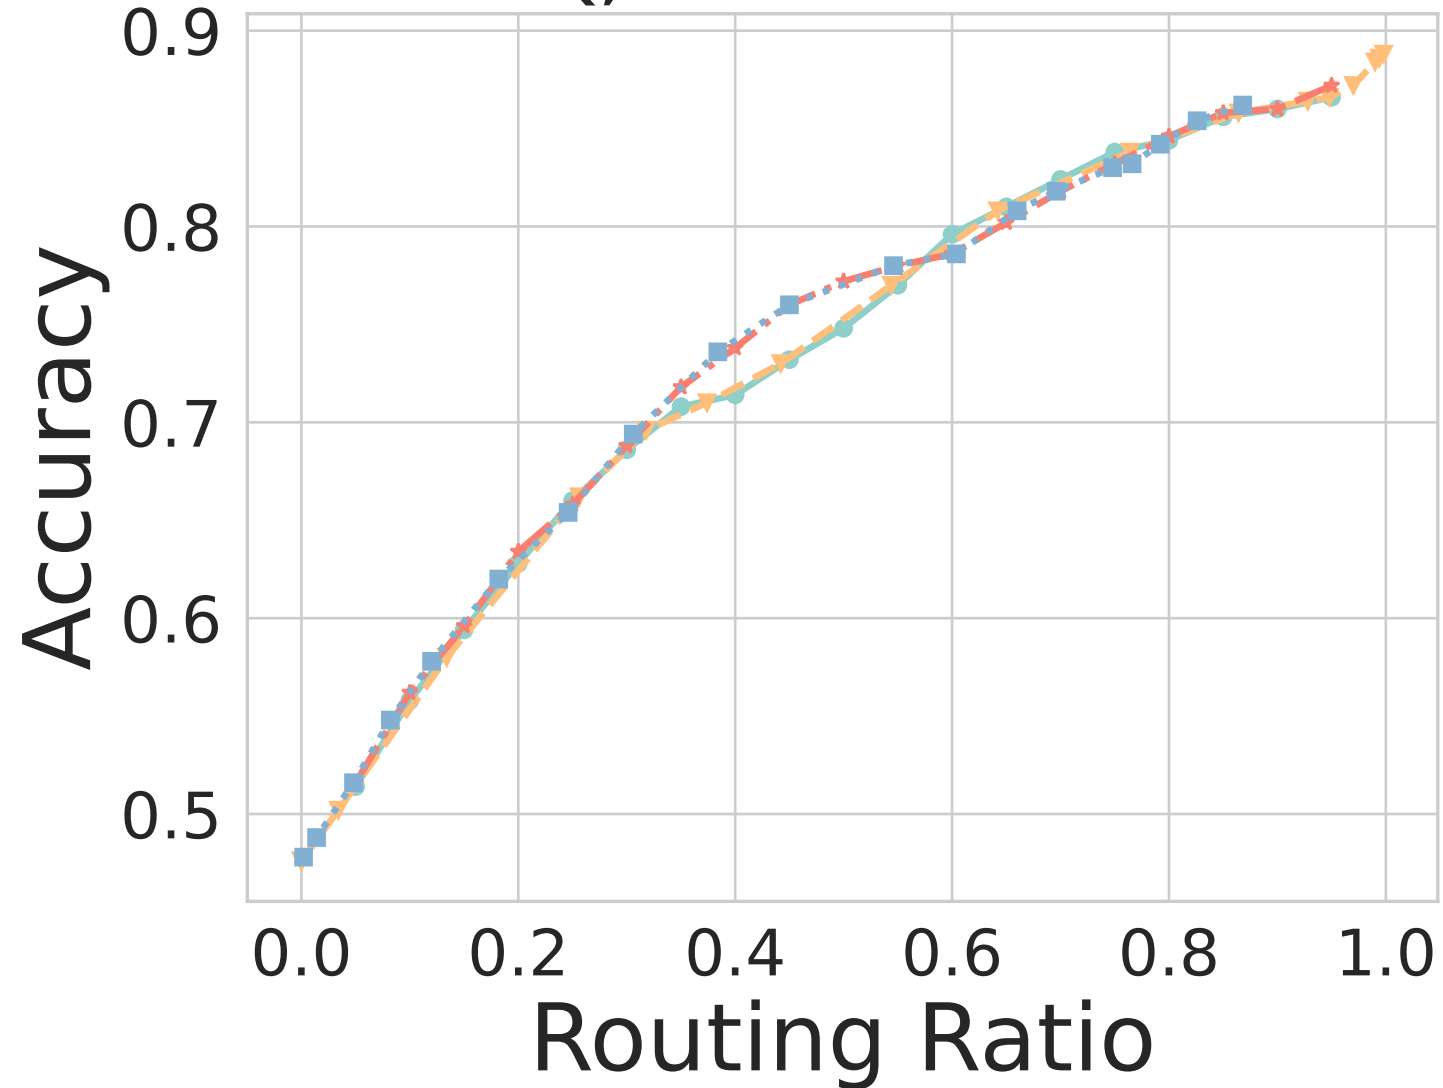

Supplement: supplementary_material [file cali_down_boolq_rwkv_gpt-4.1-mini.pdf › Routing_SLM_LLMs/Proxy_routing_prediction/to_gpt-4.1-mini/boolq_as_downstream/cali_down_boolq_rwkv_gpt-4.1-mini.pdf]

CoQA, Qwen3-0.6B to GPT-4.1 mini

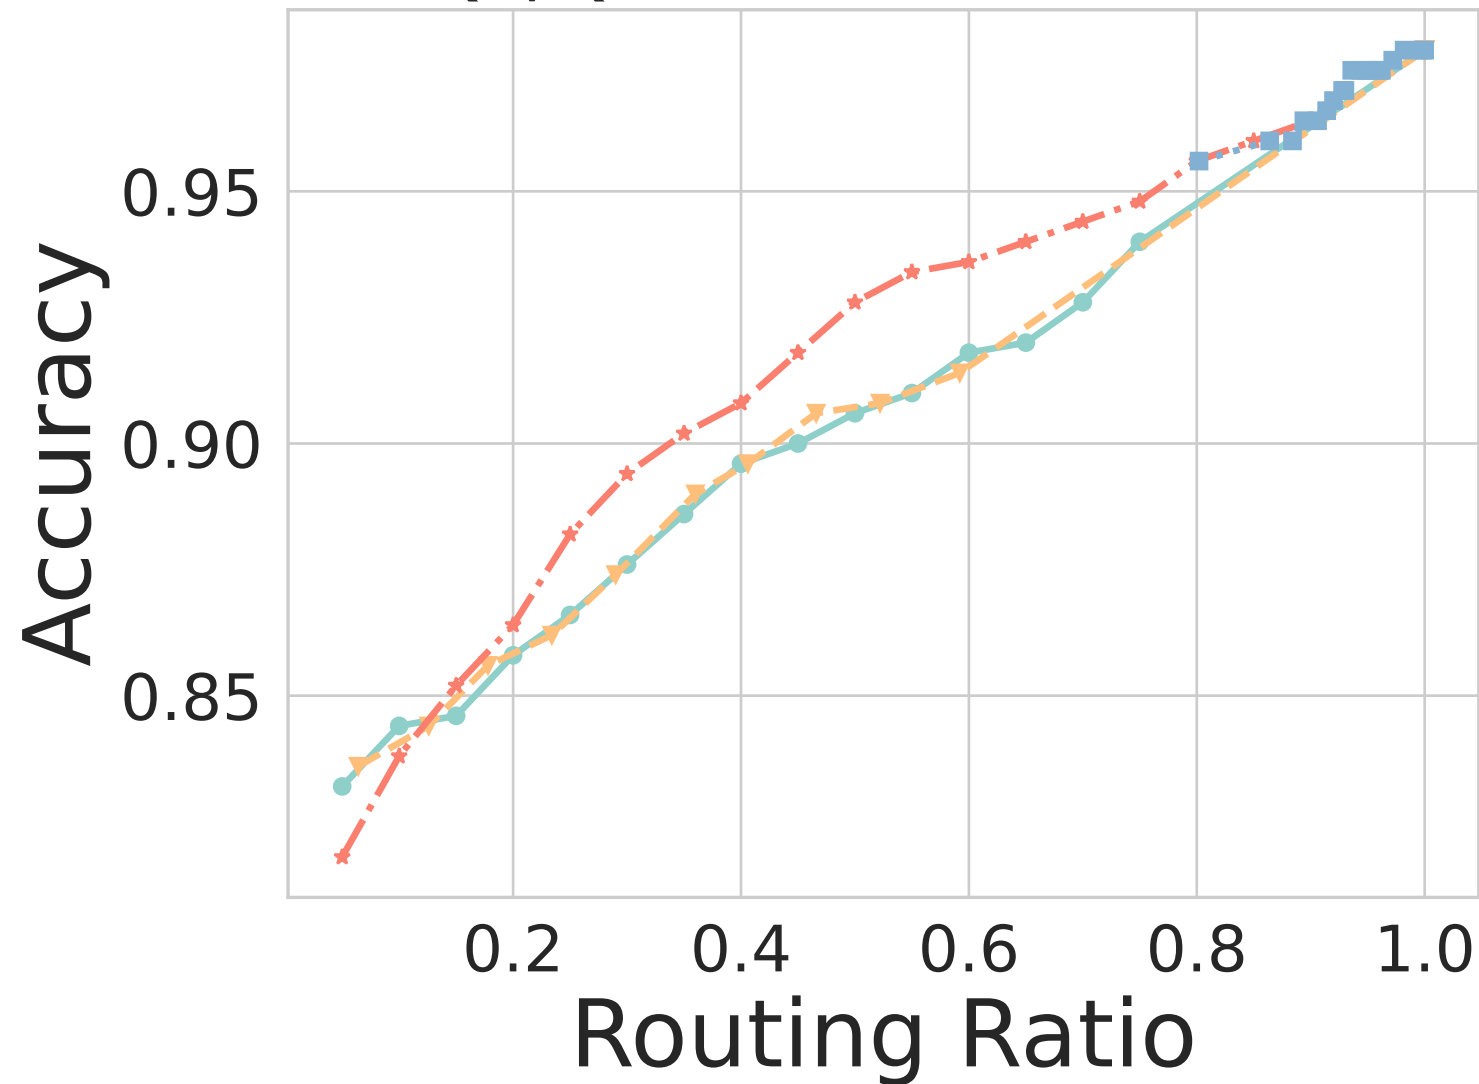

Supplement: supplementary_material [file cali_down_co_qa_Qwen3-0.6B_gpt-4.1-mini.pdf › Routing_SLM_LLMs/Proxy_routing_prediction/to_gpt-4.1-mini/co_qa_as_downstream/cali_down_co_qa_Qwen3-0.6B_gpt-4.1-mini.pdf]

CoQA, Qwen3-1.7B to GPT-4.1 mini

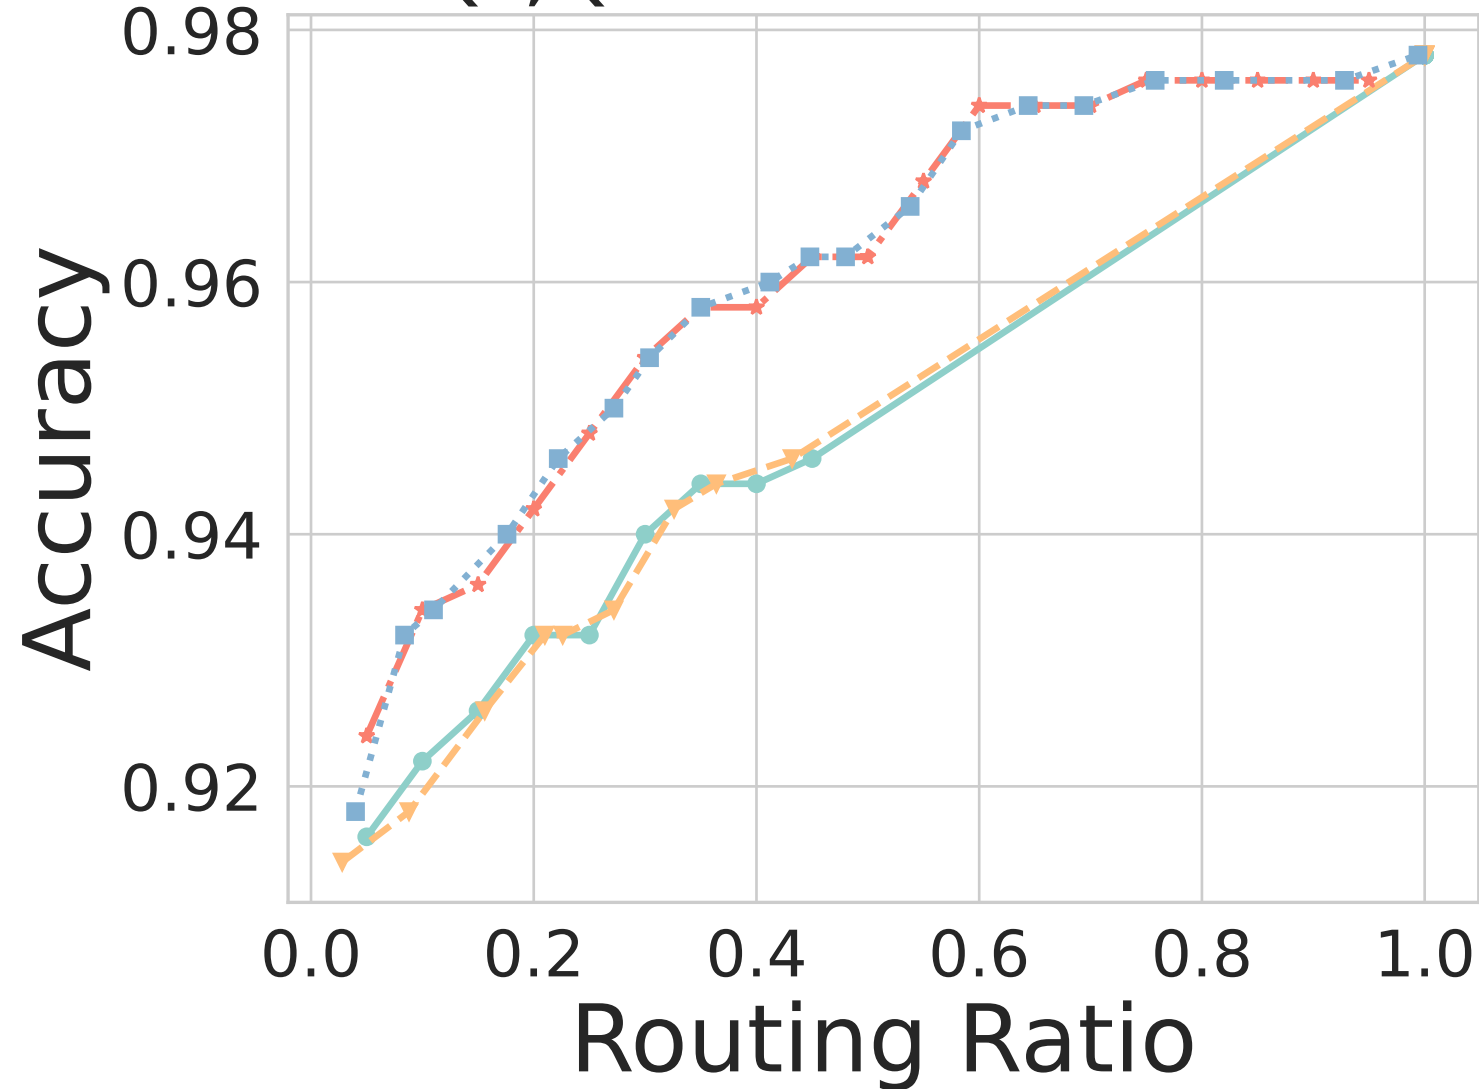

Supplement: supplementary_material [file cali_down_co_qa_Qwen3-1.7B_gpt-4.1-mini.pdf › Routing_SLM_LLMs/Proxy_routing_prediction/to_gpt-4.1-mini/co_qa_as_downstream/cali_down_co_qa_Qwen3-1.7B_gpt-4.1-mini.pdf]

CoQA, Qwen3-4B to GPT-4.1 mini

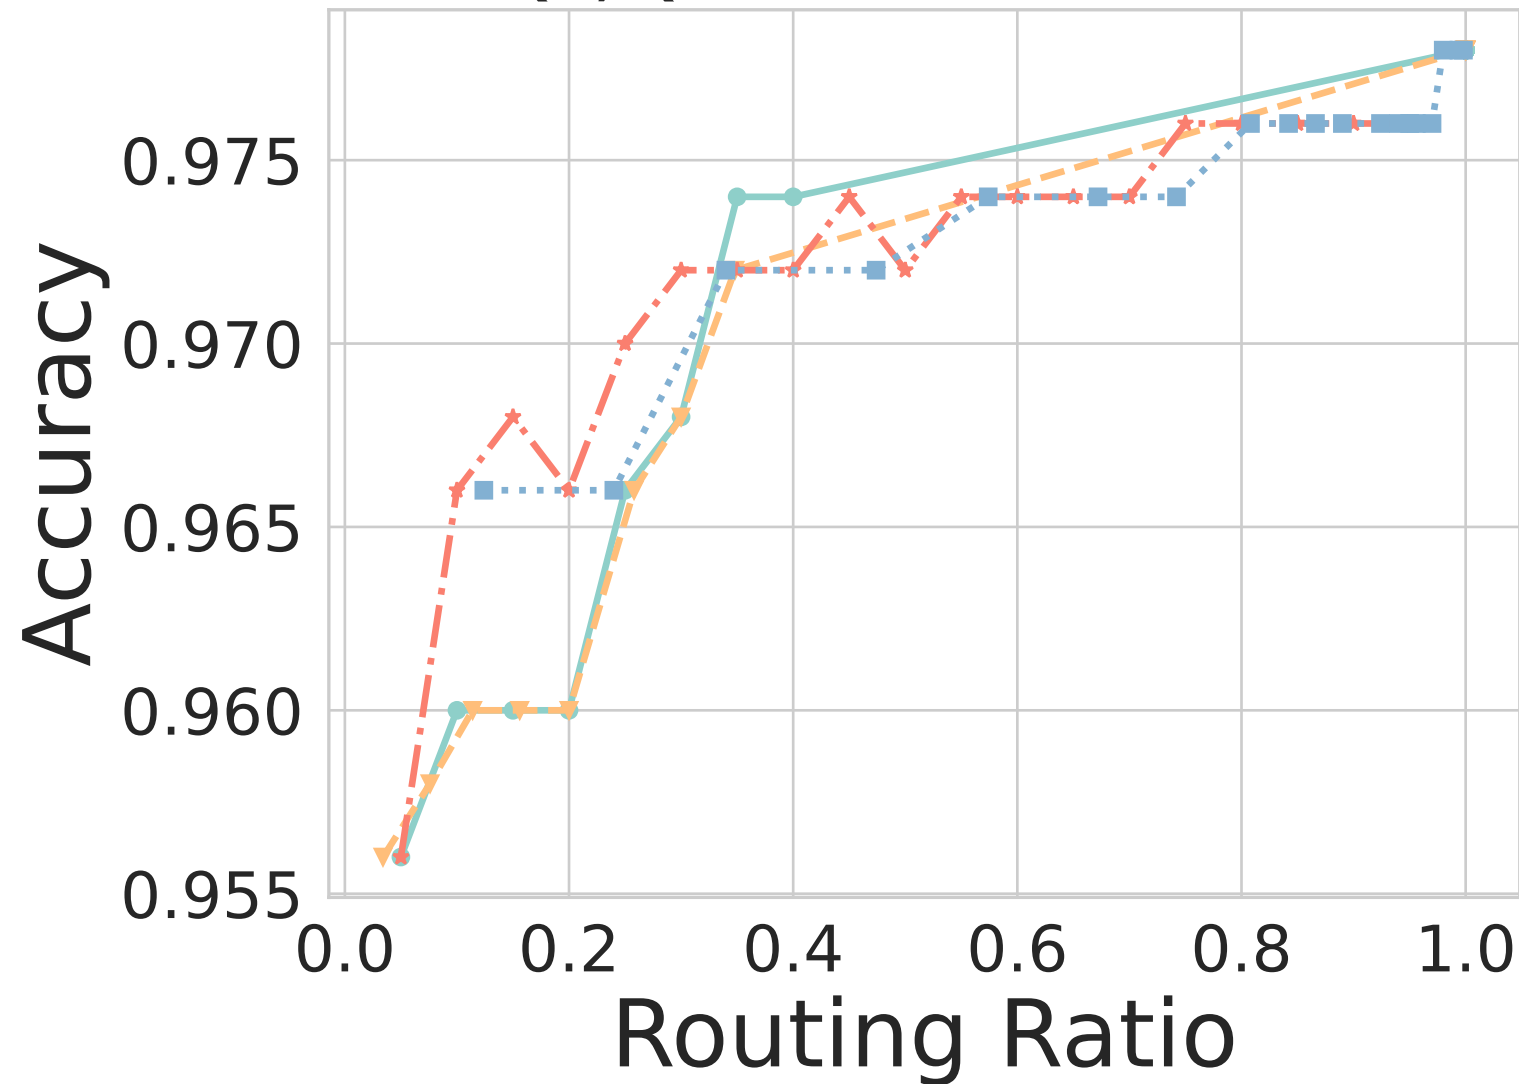

Supplement: supplementary_material [file cali_down_co_qa_Qwen3-4B_gpt-4.1-mini.pdf › Routing_SLM_LLMs/Proxy_routing_prediction/to_gpt-4.1-mini/co_qa_as_downstream/cali_down_co_qa_Qwen3-4B_gpt-4.1-mini.pdf]

CoQA, granite-3.1-8b to GPT-4.1 mini

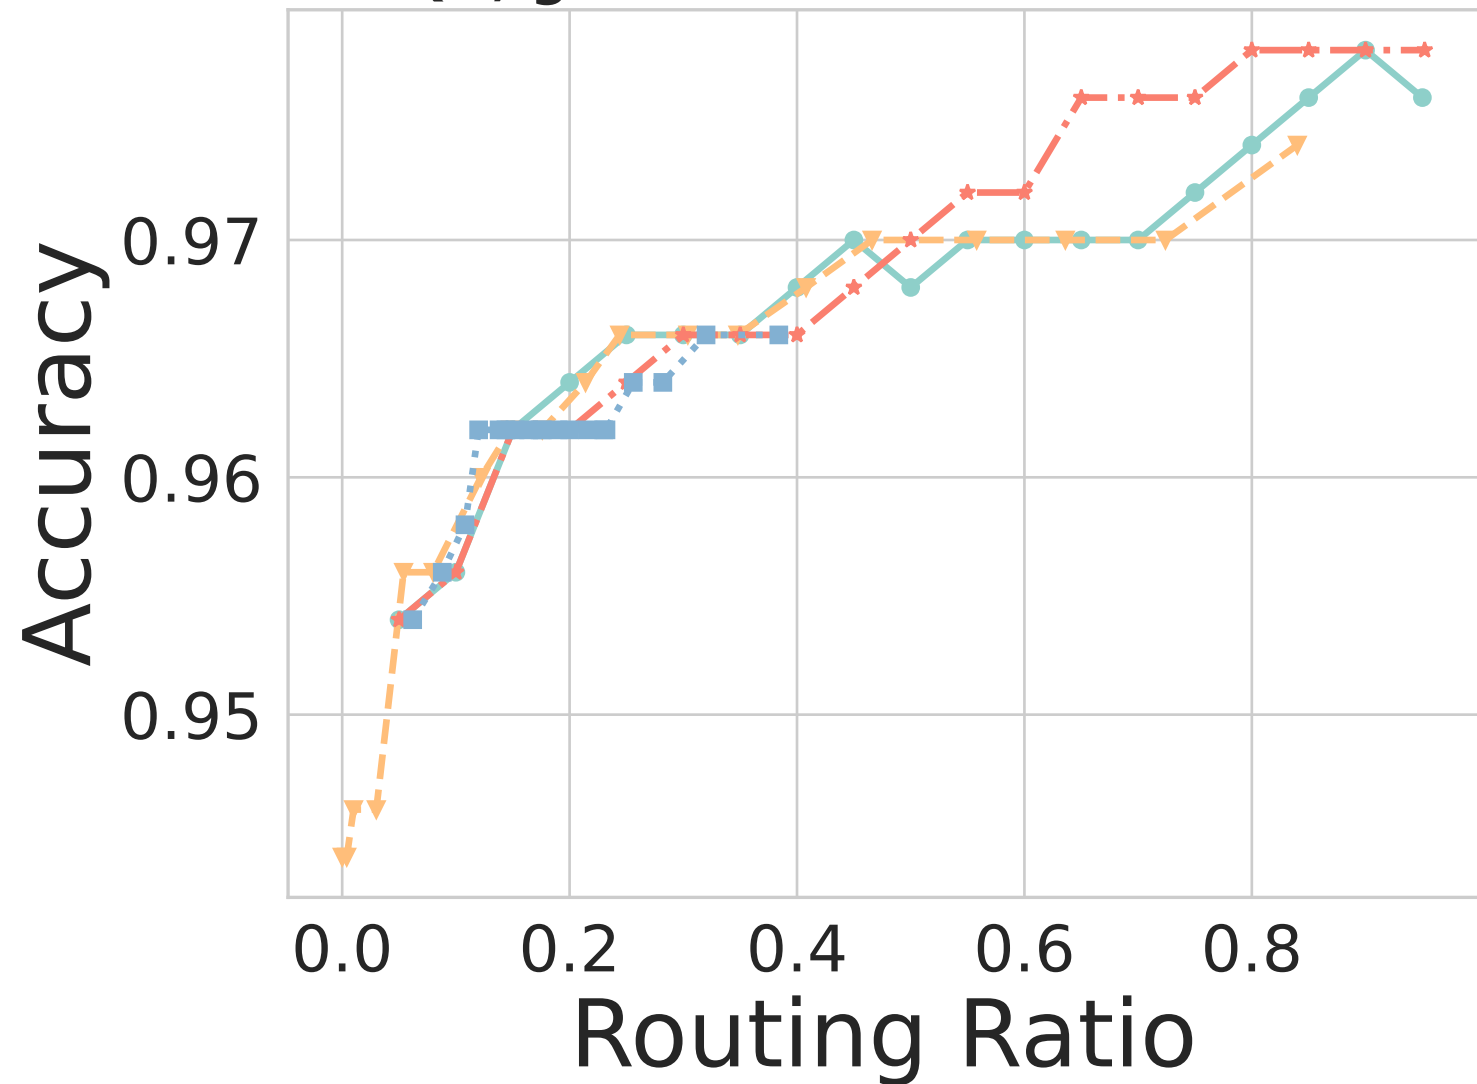

Supplement: supplementary_material [file cali_down_co_qa_granite-3.1-8b_gpt-4.1-mini.pdf › Routing_SLM_LLMs/Proxy_routing_prediction/to_gpt-4.1-mini/co_qa_as_downstream/cali_down_co_qa_granite-3.1-8b_gpt-4.1-mini.pdf]

**CoQA, llama-3.1-8b to GPT-4.1 mini**

Accuracy

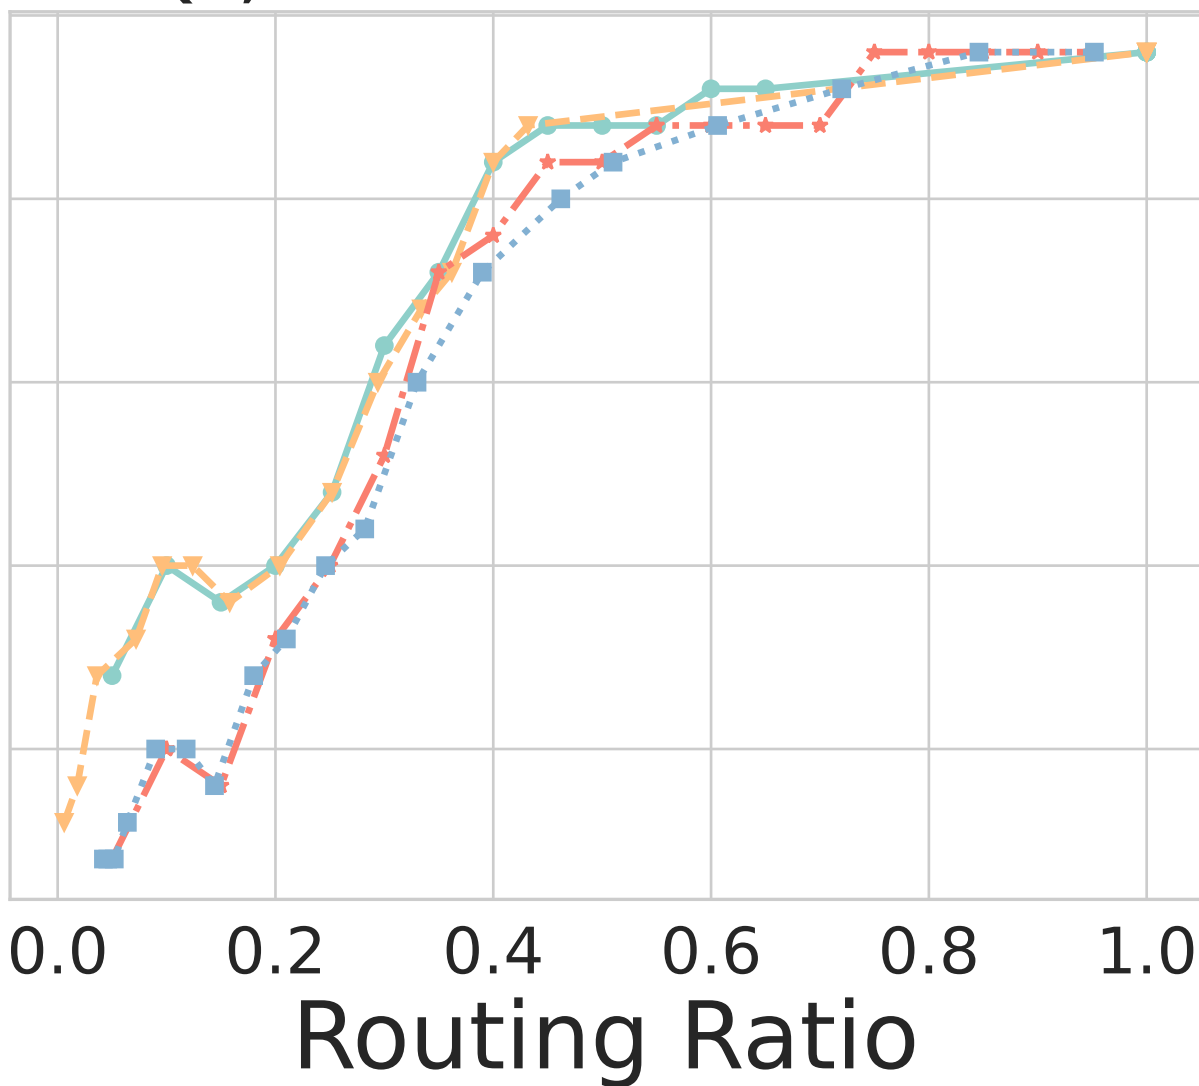

Supplement: supplementary_material [file cali_down_co_qa_llama-3.1-8b_gpt-4.1-mini.pdf › Routing_SLM_LLMs/Proxy_routing_prediction/to_gpt-4.1-mini/co_qa_as_downstream/cali_down_co_qa_llama-3.1-8b_gpt-4.1-mini.pdf]

**CoQA, llama-3.2-1b to GPT-4.1 mini**

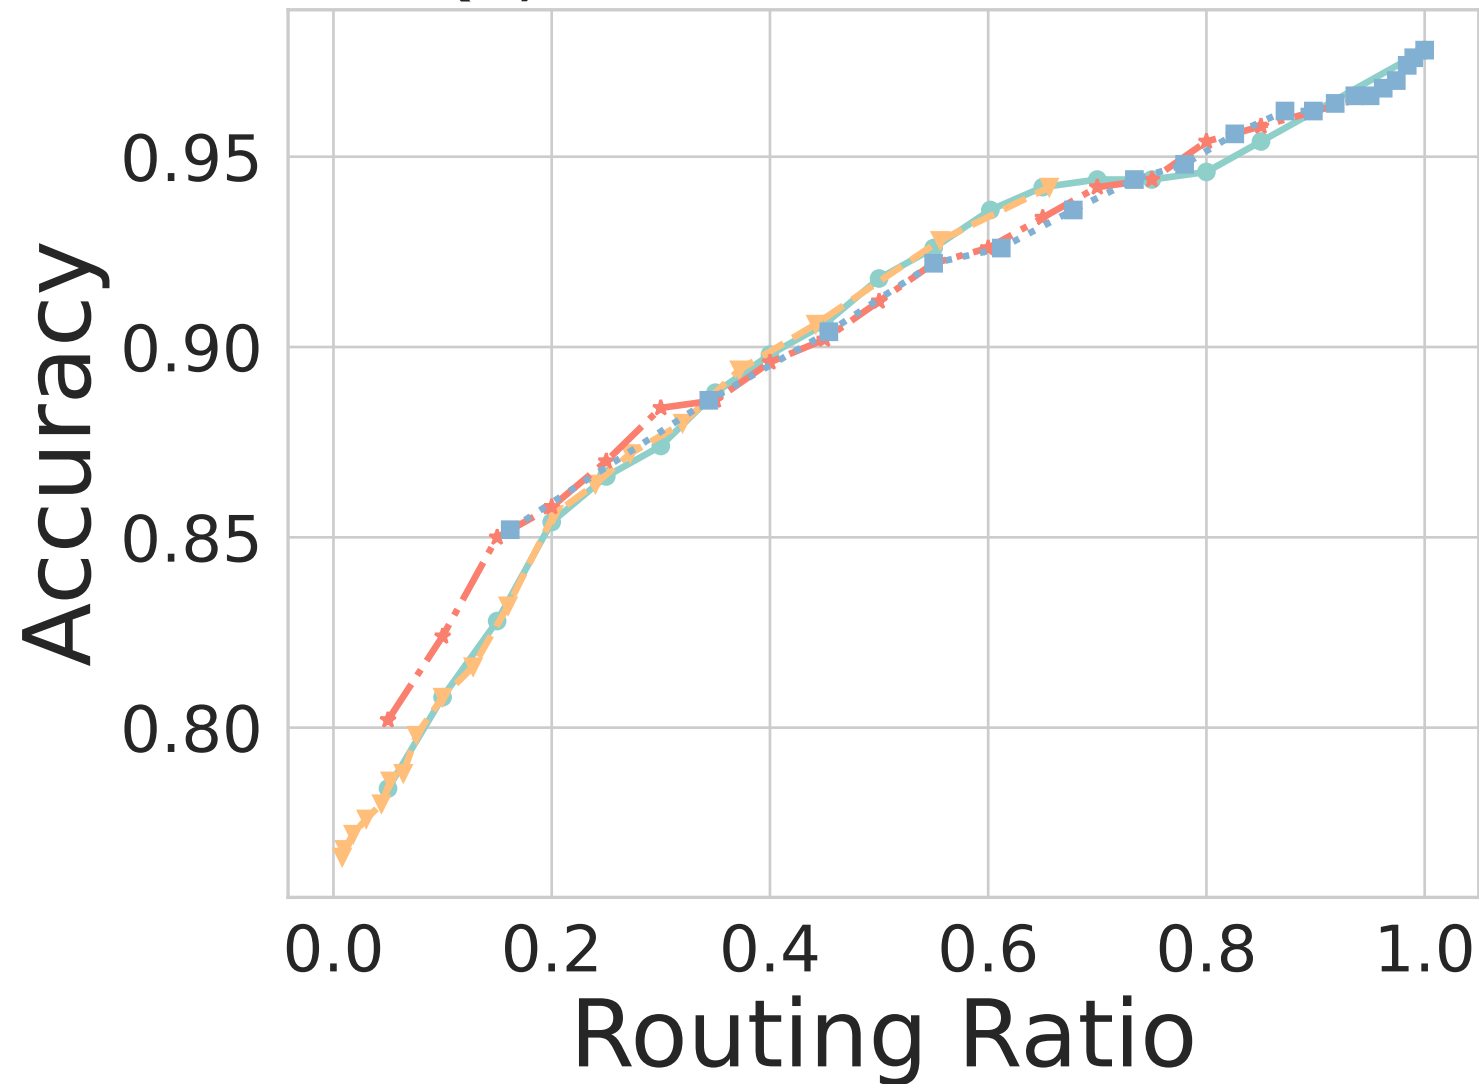

Supplement: supplementary_material [file cali_down_co_qa_llama-3.2-1b_gpt-4.1-mini.pdf › Routing_SLM_LLMs/Proxy_routing_prediction/to_gpt-4.1-mini/co_qa_as_downstream/cali_down_co_qa_llama-3.2-1b_gpt-4.1-mini.pdf]

CoQA, llama-3.2-3b to GPT-4.1 mini

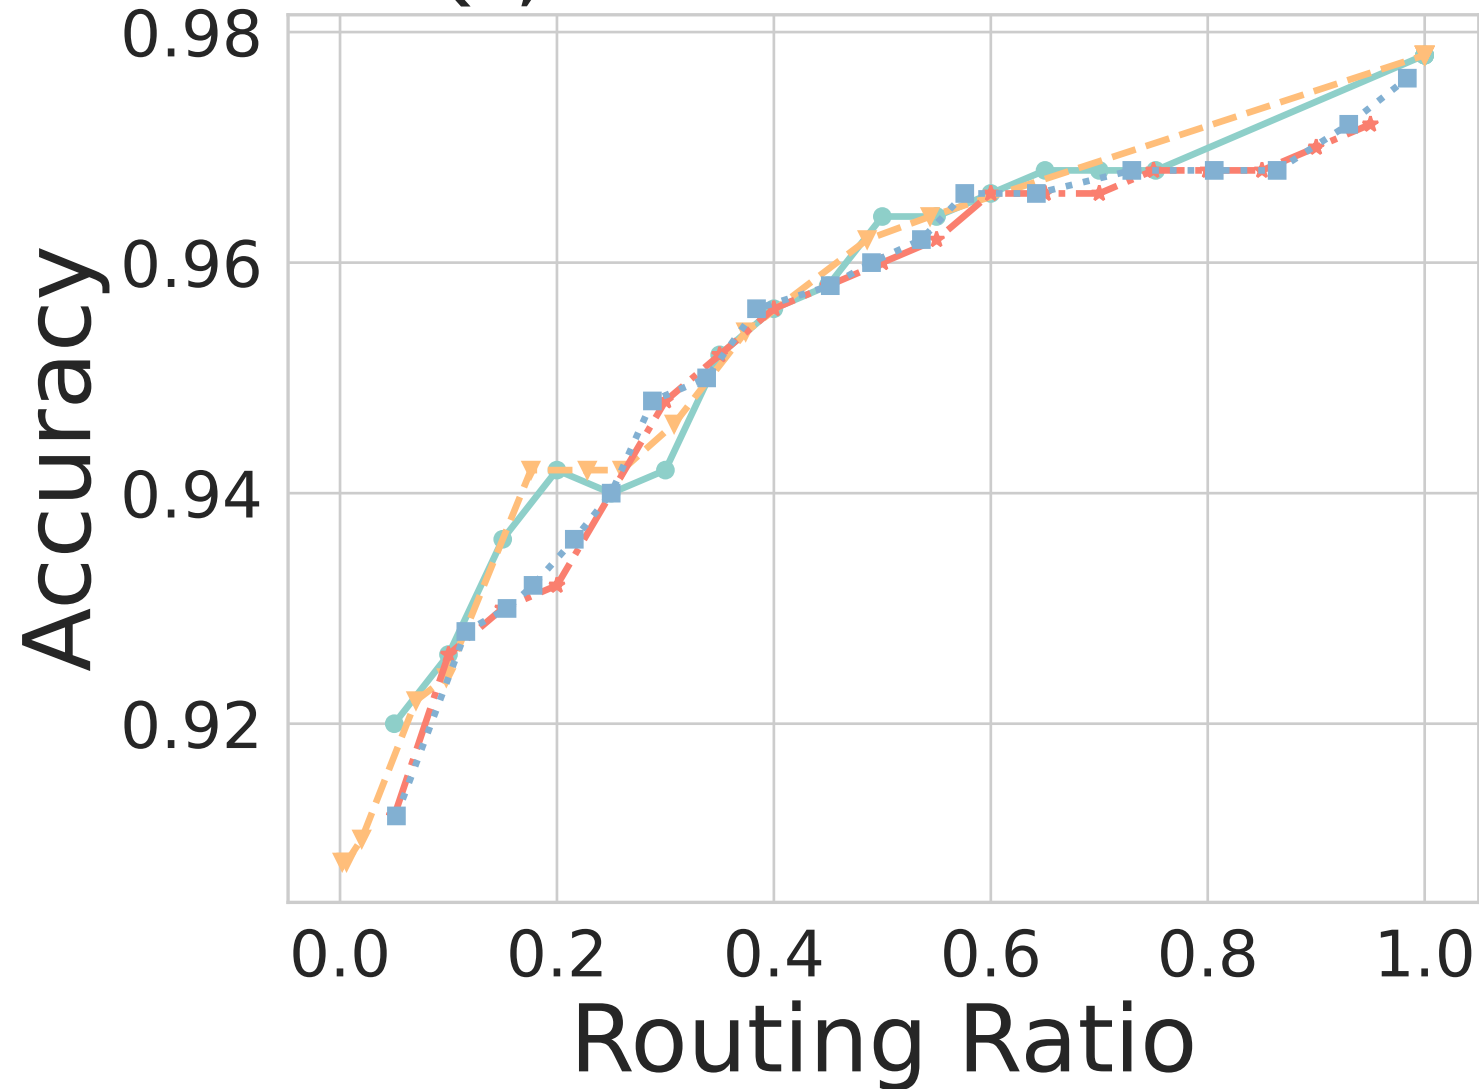

Supplement: supplementary_material [file cali_down_co_qa_llama-3.2-3b_gpt-4.1-mini.pdf › Routing_SLM_LLMs/Proxy_routing_prediction/to_gpt-4.1-mini/co_qa_as_downstream/cali_down_co_qa_llama-3.2-3b_gpt-4.1-mini.pdf]

**CoQA, mistral-7b to GPT-4.1 mini**

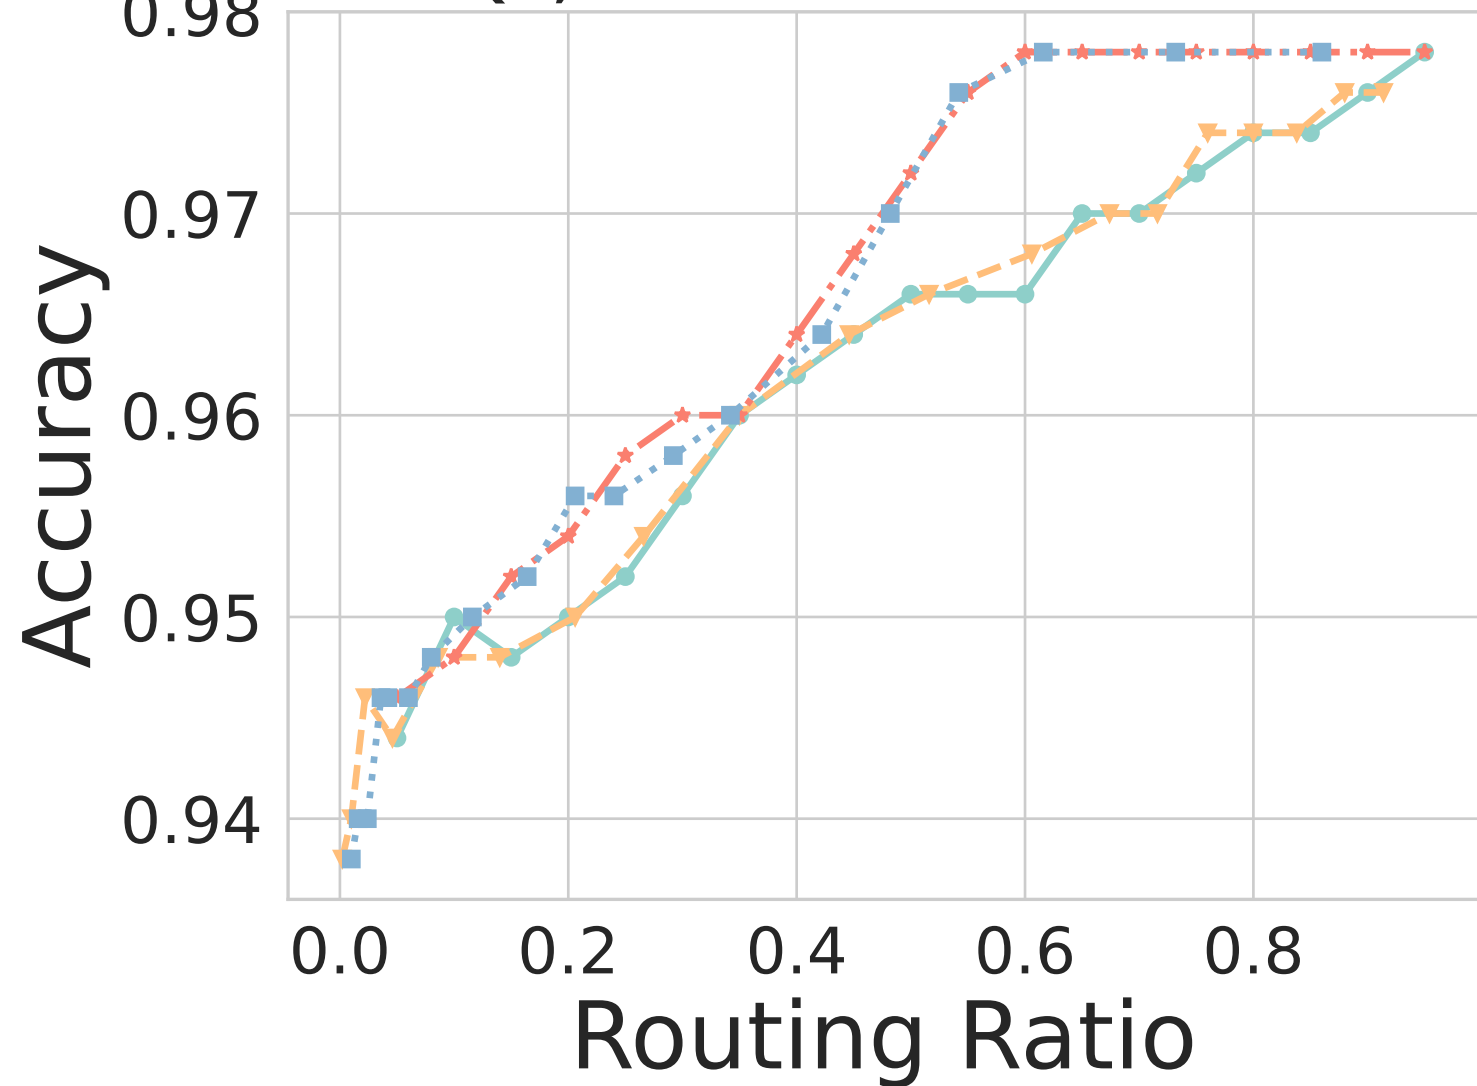

Supplement: supplementary_material [file cali_down_co_qa_mistral-7b_gpt-4.1-mini.pdf › Routing_SLM_LLMs/Proxy_routing_prediction/to_gpt-4.1-mini/co_qa_as_downstream/cali_down_co_qa_mistral-7b_gpt-4.1-mini.pdf]

**CoQA, phi-3.5-mini to GPT-4.1 mini**

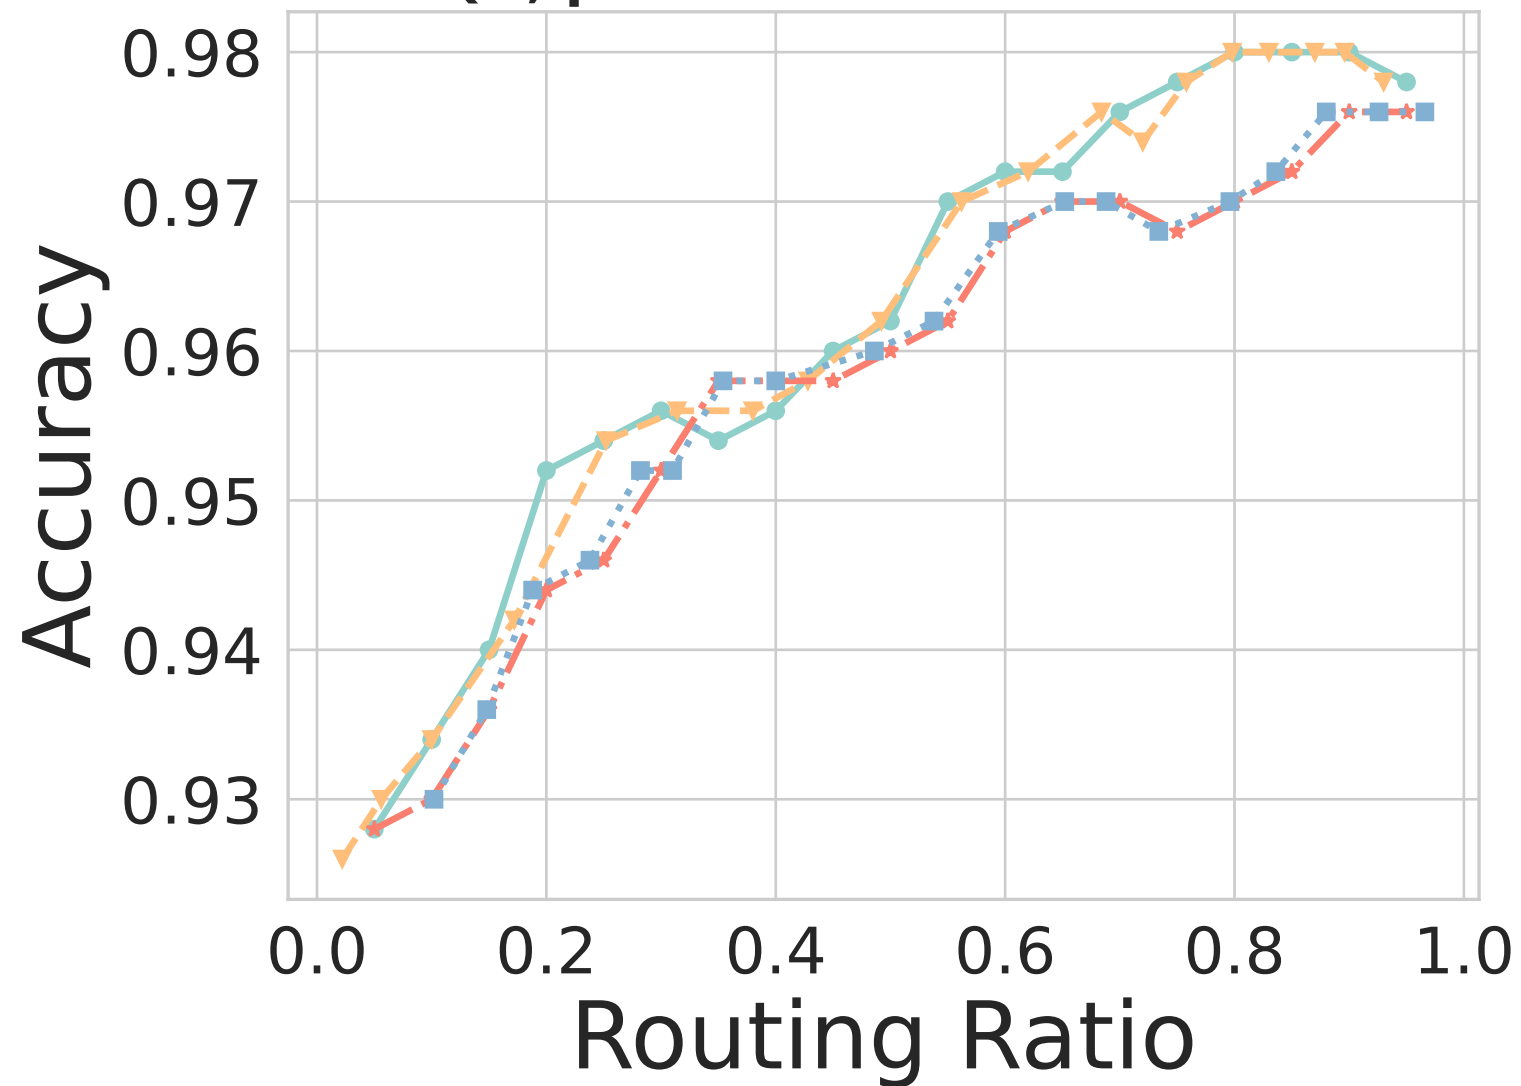

Supplement: supplementary_material [file cali_down_co_qa_phi-3.5-mini_gpt-4.1-mini.pdf › Routing_SLM_LLMs/Proxy_routing_prediction/to_gpt-4.1-mini/co_qa_as_downstream/cali_down_co_qa_phi-3.5-mini_gpt-4.1-mini.pdf]

CoQA, phi-4-mini-reasoning to GPT-4.1 mini

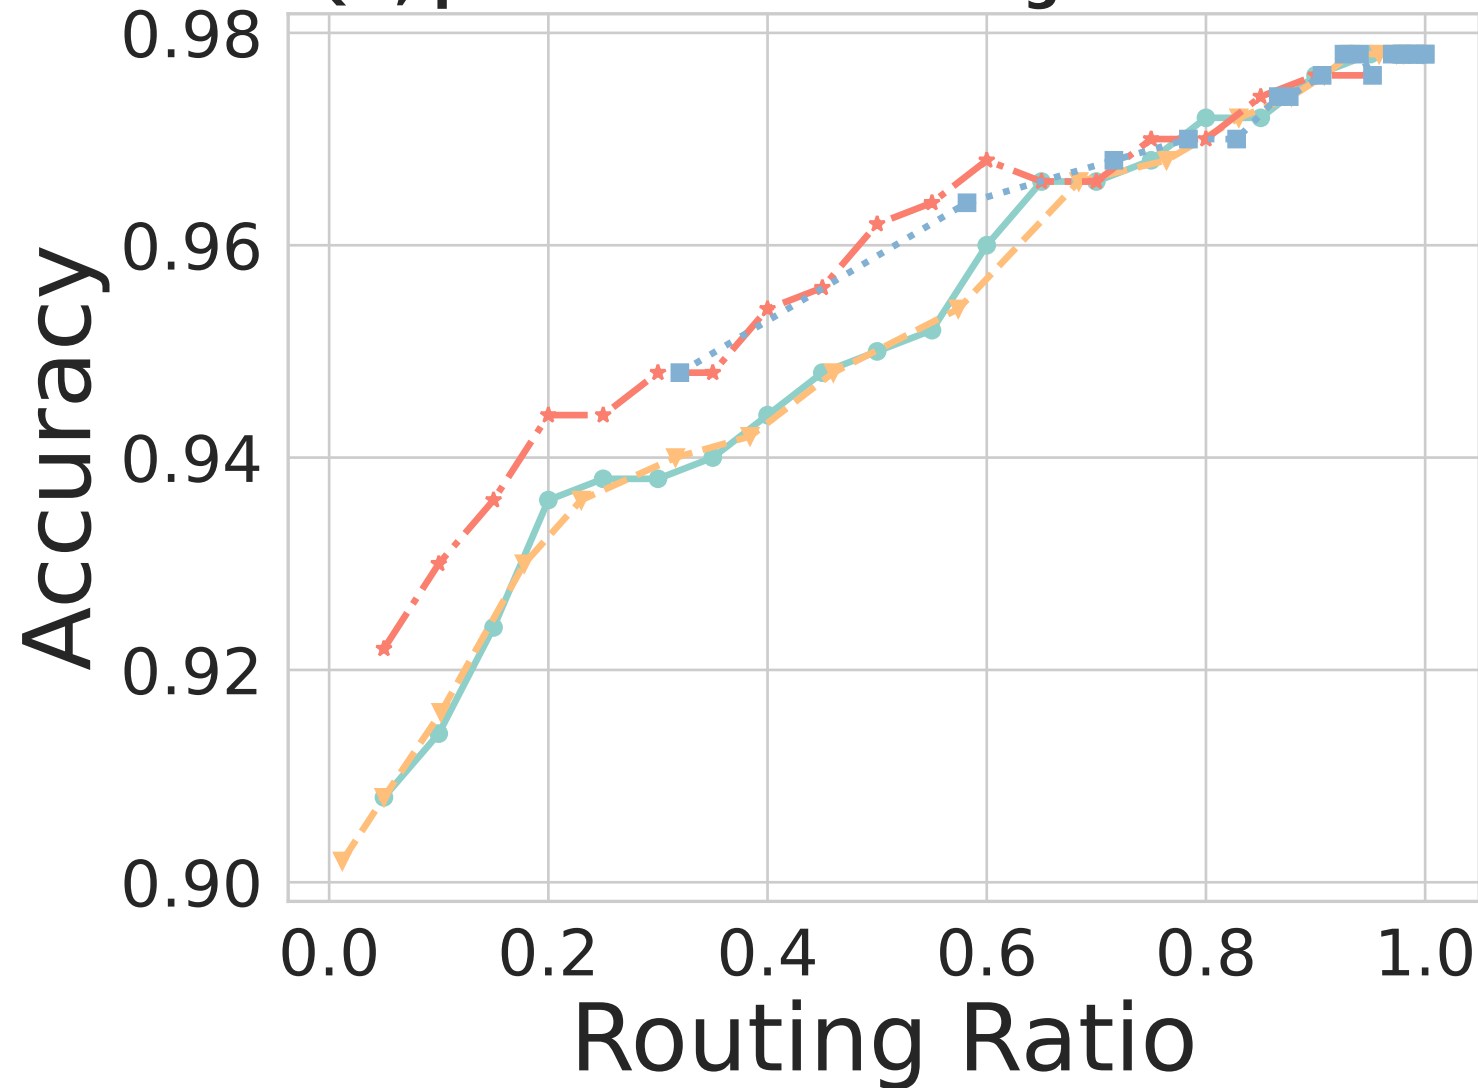

Supplement: supplementary_material [file cali_down_co_qa_phi-4-mini-reasoning_gpt-4.1-mini.pdf › Routing_SLM_LLMs/Proxy_routing_prediction/to_gpt-4.1-mini/co_qa_as_downstream/cali_down_co_qa_phi-4-mini-reasoning_gpt-4.1-mini.pdf]

CoQA, qwen-2.5-7b to GPT-4.1 mini

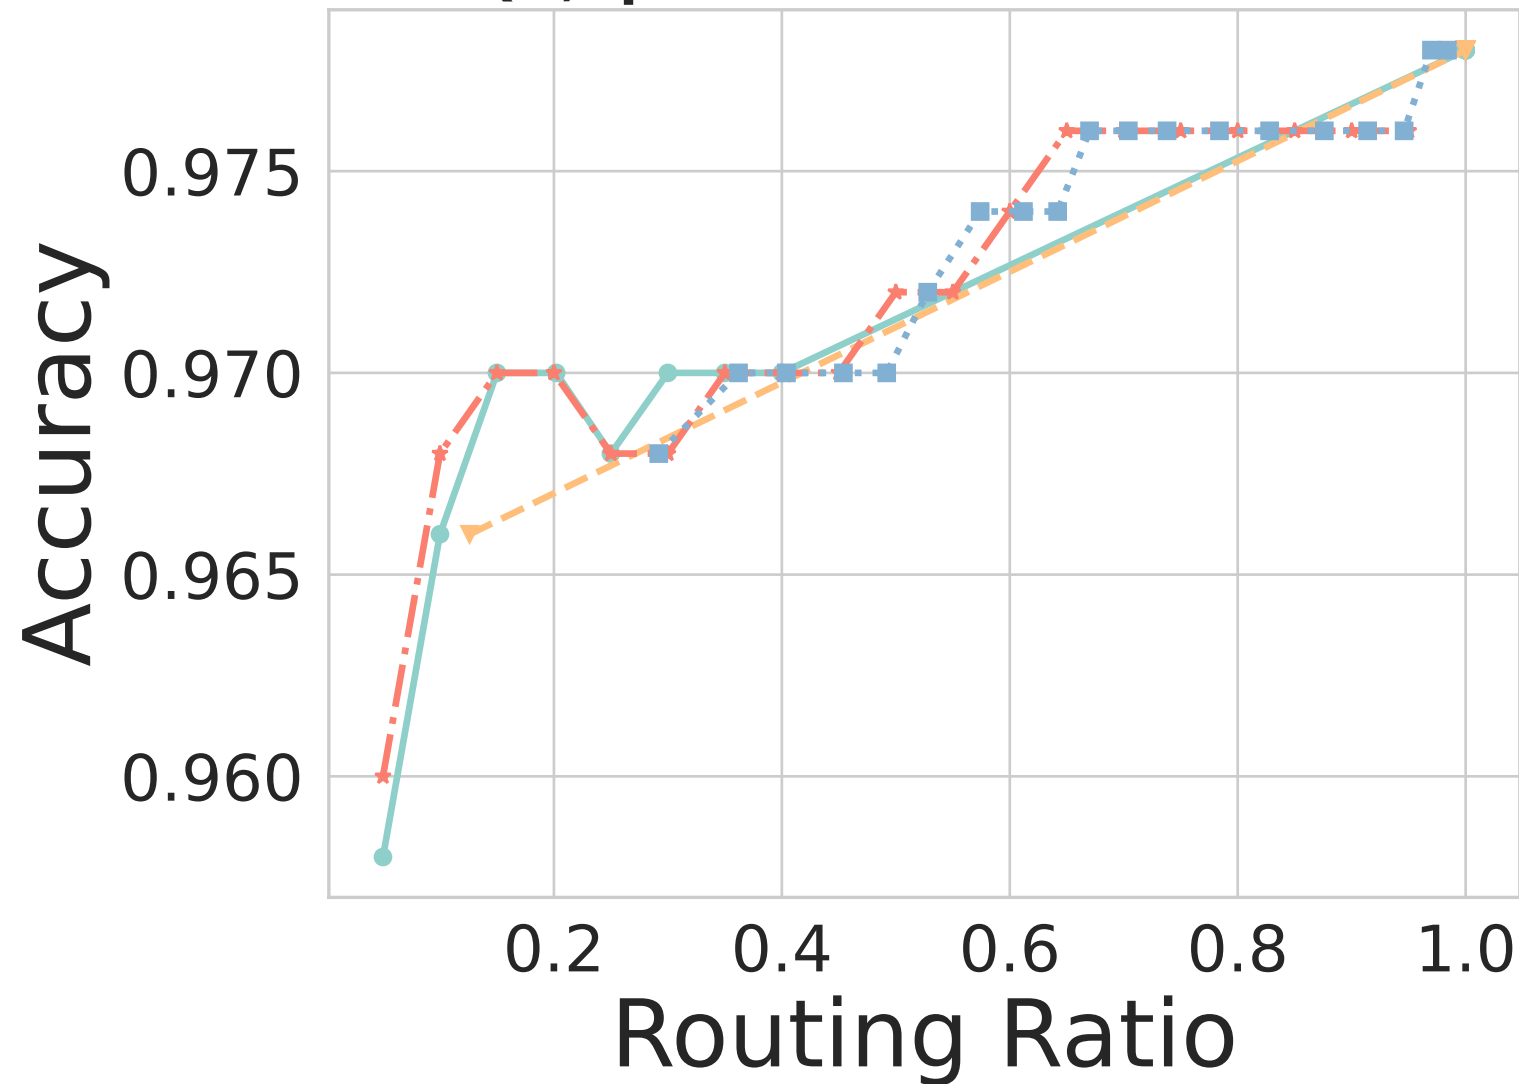

Supplement: supplementary_material [file cali_down_co_qa_qwen-2.5-7b_gpt-4.1-mini.pdf › Routing_SLM_LLMs/Proxy_routing_prediction/to_gpt-4.1-mini/co_qa_as_downstream/cali_down_co_qa_qwen-2.5-7b_gpt-4.1-mini.pdf]

CoQA, rwkv to GPT-4.1 mini

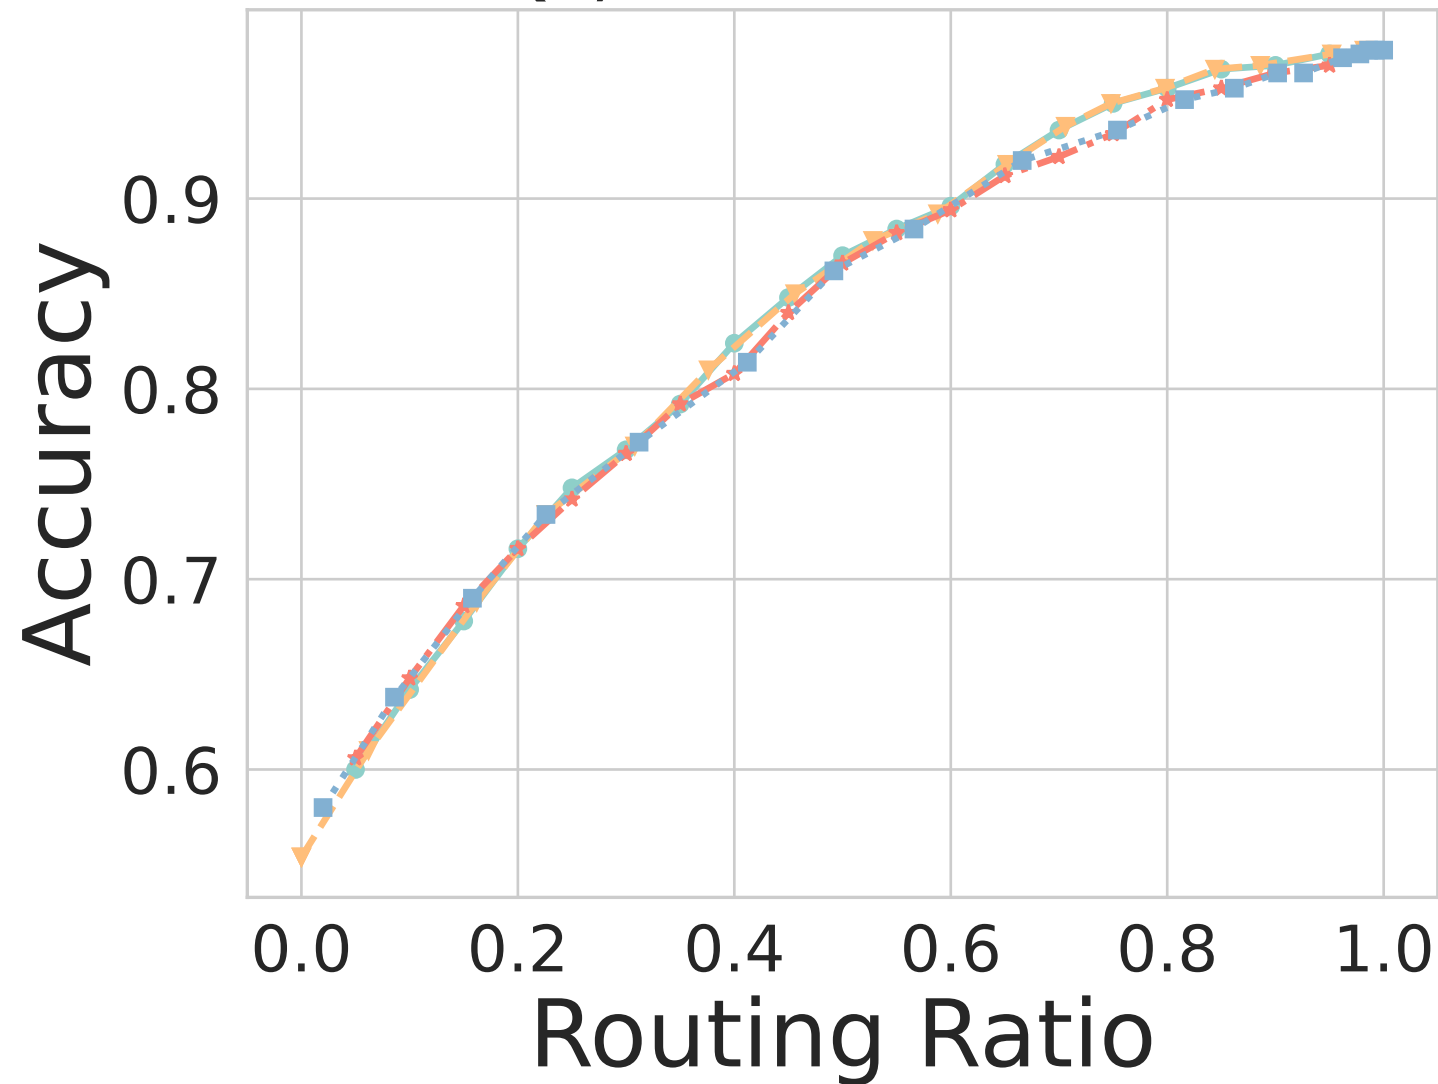

Supplement: supplementary_material [file cali_down_co_qa_rwkv_gpt-4.1-mini.pdf › Routing_SLM_LLMs/Proxy_routing_prediction/to_gpt-4.1-mini/co_qa_as_downstream/cali_down_co_qa_rwkv_gpt-4.1-mini.pdf]

**CommonsenseQA, Qwen3-0.6B to GPT-4.1 mini**

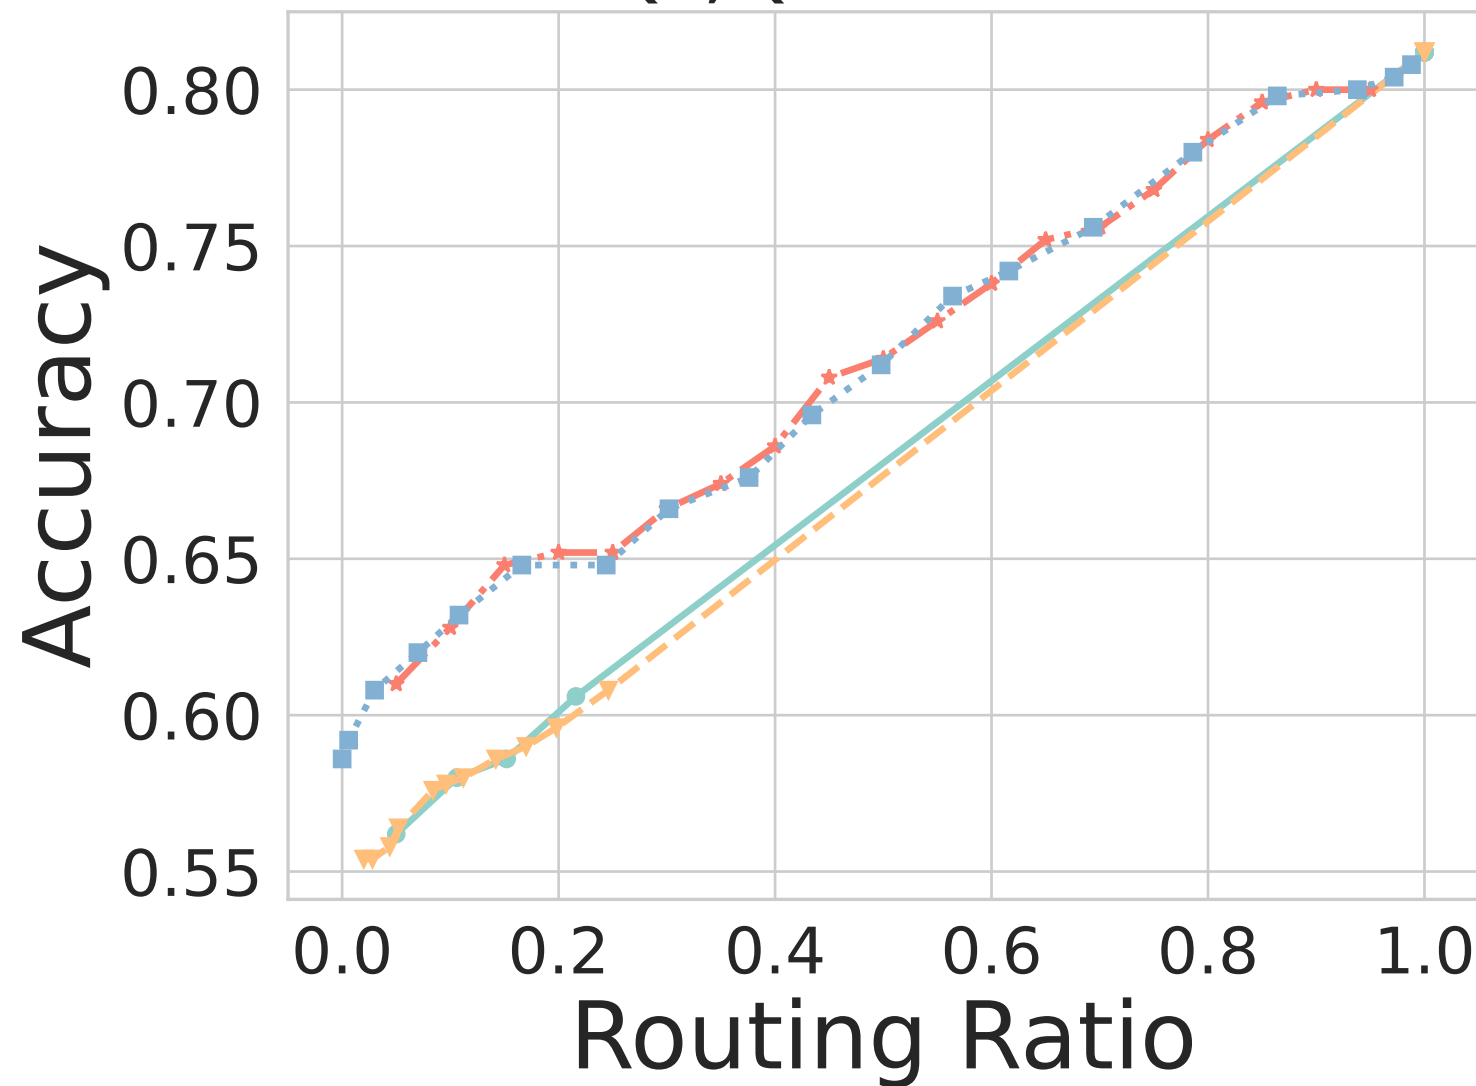

Supplement: supplementary_material [file cali_down_commonsense_qa_Qwen3-0.6B_gpt-4.1-mini.pdf › Routing_SLM_LLMs/Proxy_routing_prediction/to_gpt-4.1-mini/commonsense_qa_as_downstream/cali_down_commonsense_qa_Qwen3-0.6B_gpt-4.1-mini.pdf]

CommonsenseQA, Qwen3-1.7B to GPT-4.1 mini

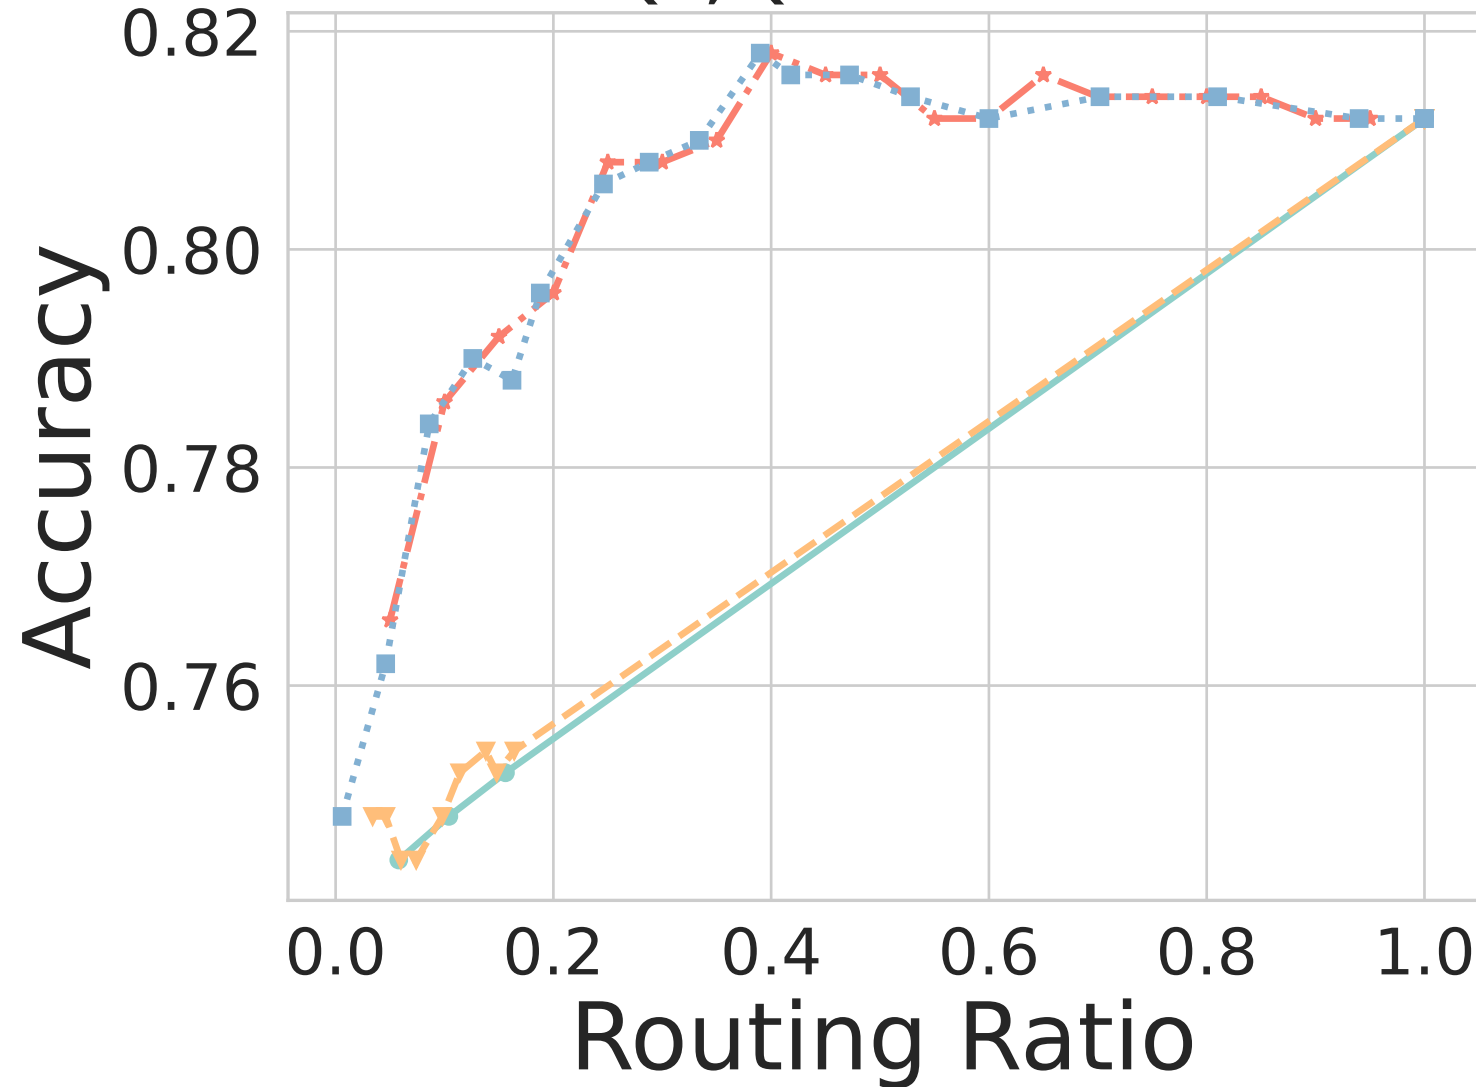

Supplement: supplementary_material [file cali_down_commonsense_qa_Qwen3-1.7B_gpt-4.1-mini.pdf.pdf › Routing_SLM_LLMs/Proxy_routing_prediction/to_gpt-4.1-mini/commonsense_qa_as_downstream/cali_down_commonsense_qa_Qwen3-1.7B_gpt-4.1-mini.pdf.pdf]

**CommonsenseQA, Qwen3-4B to GPT-4.1 mini**

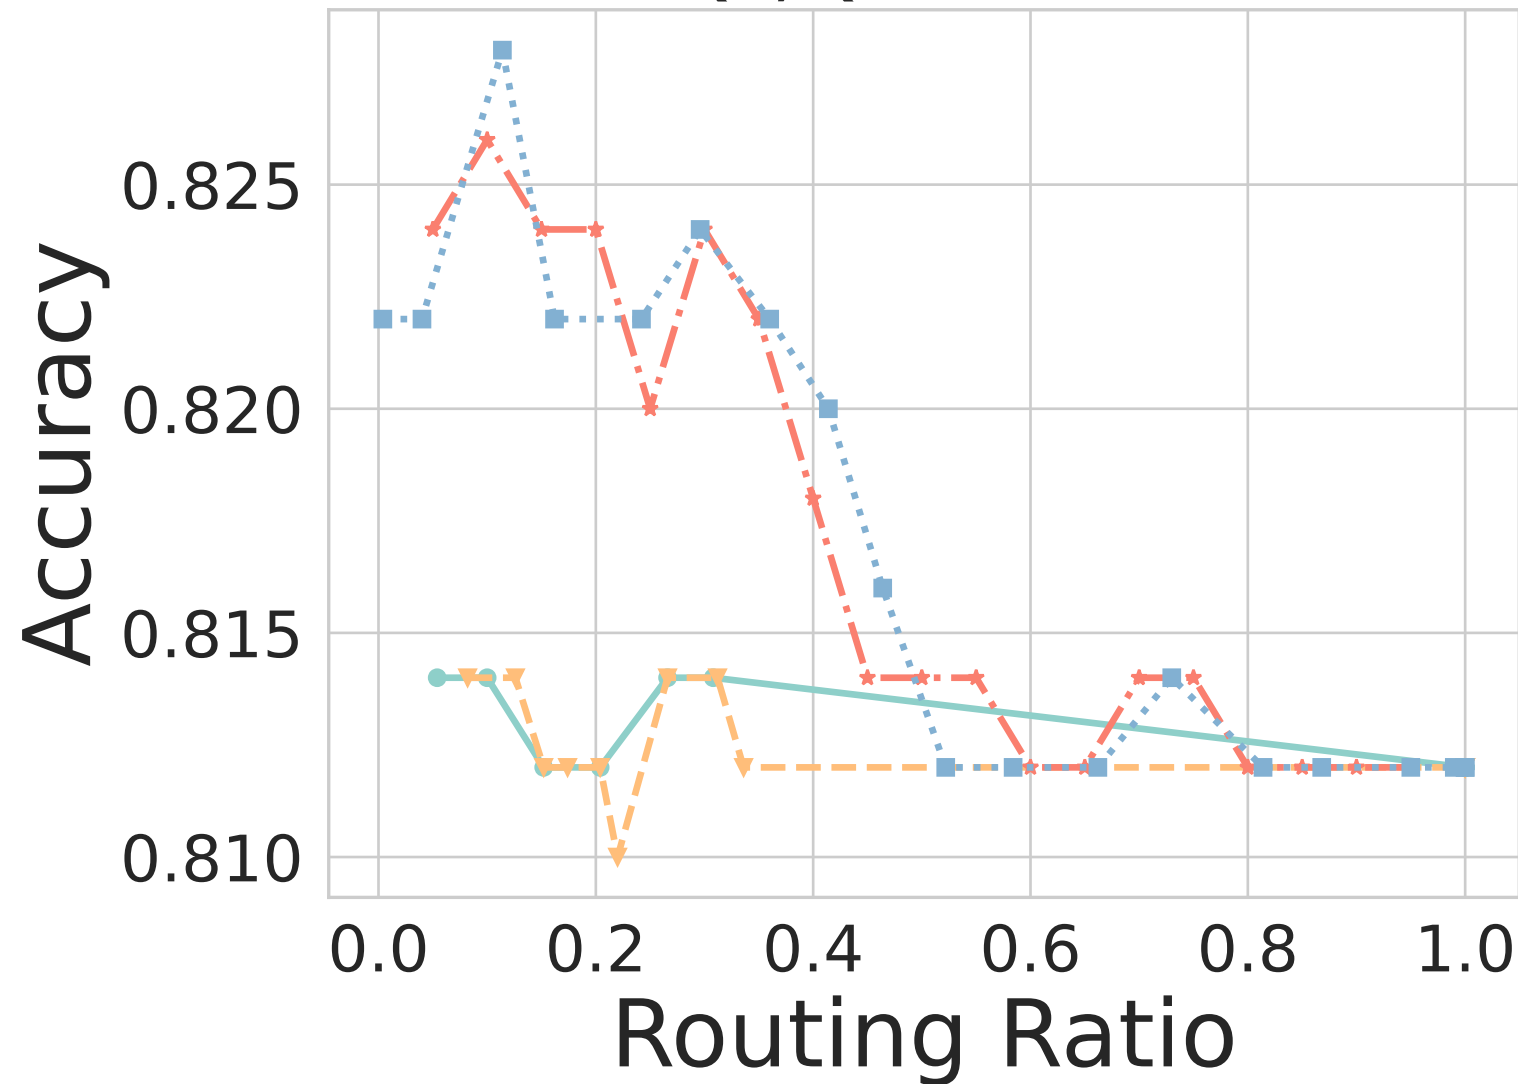

Supplement: supplementary_material [file cali_down_commonsense_qa_Qwen3-4B_gpt-4.1-mini.pdf › Routing_SLM_LLMs/Proxy_routing_prediction/to_gpt-4.1-mini/commonsense_qa_as_downstream/cali_down_commonsense_qa_Qwen3-4B_gpt-4.1-mini.pdf]

**CommonsenseQA, granite-3.1-8b to GPT-4.1 mini**

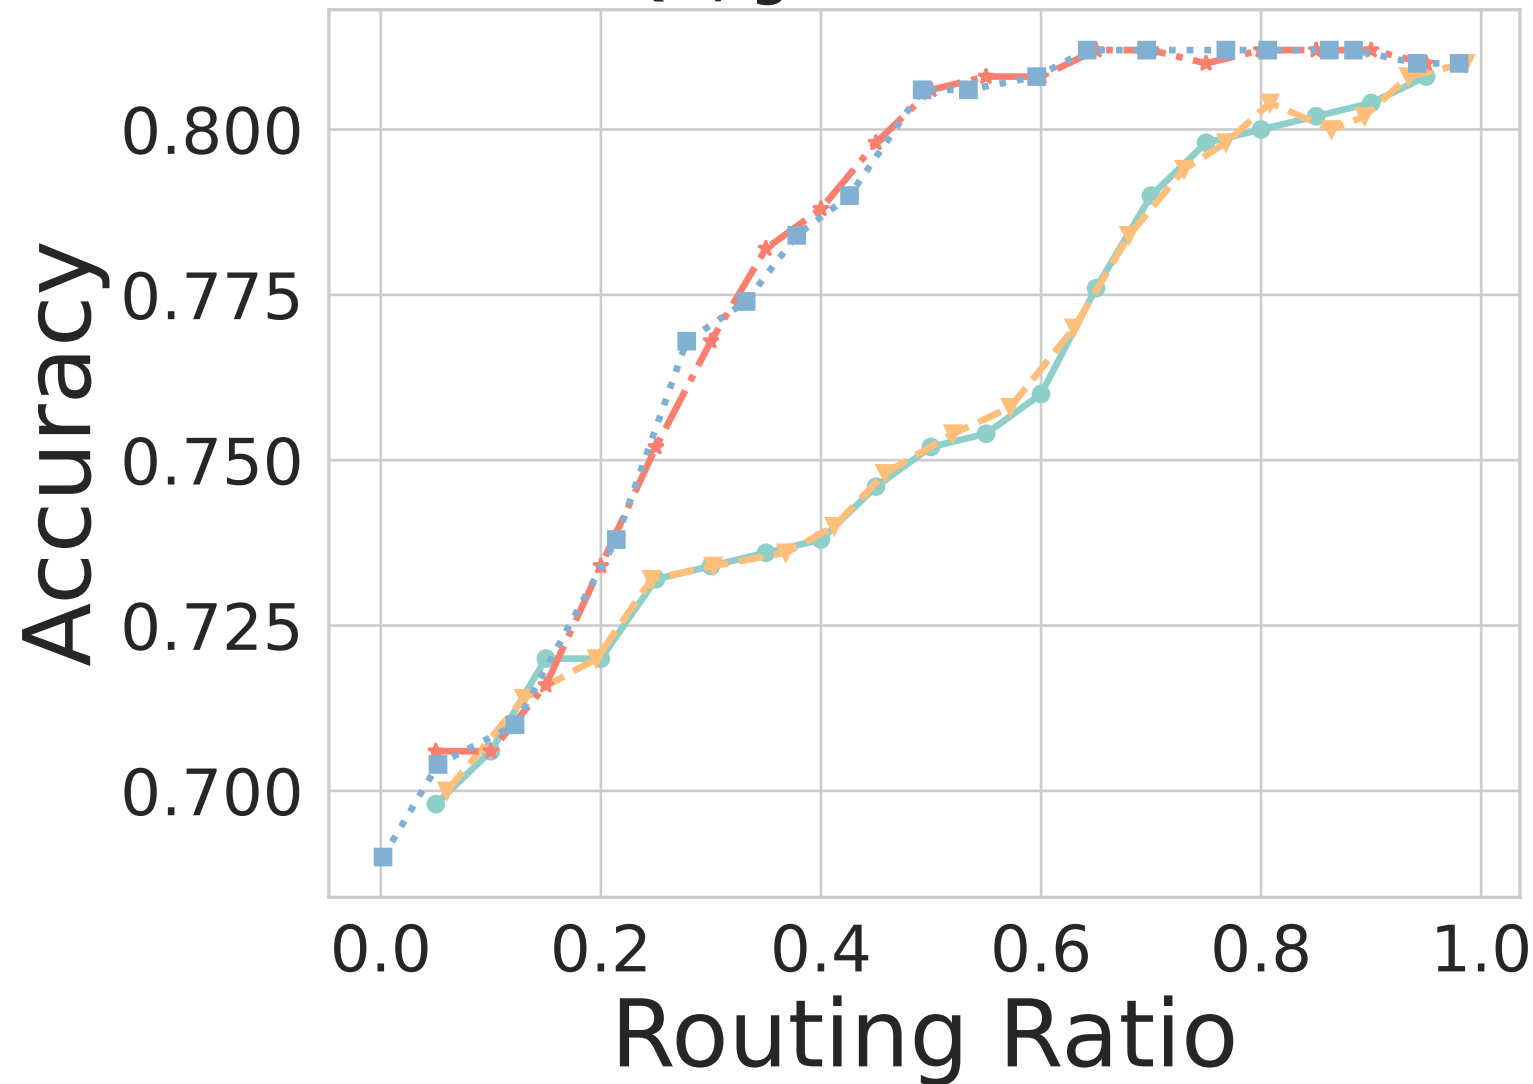

Supplement: supplementary_material [file cali_down_commonsense_qa_granite-3.1-8b_gpt-4.1-mini.pdf › Routing_SLM_LLMs/Proxy_routing_prediction/to_gpt-4.1-mini/commonsense_qa_as_downstream/cali_down_commonsense_qa_granite-3.1-8b_gpt-4.1-mini.pdf]
