# Supplementary material (part 6 of 14)
Source: ML conference proceedings conference paper supplement (https://openreview.net/forum?id=smdbra3VEi)

**Social IQa, phi-3.5-mini to GPT-4.1 mini**

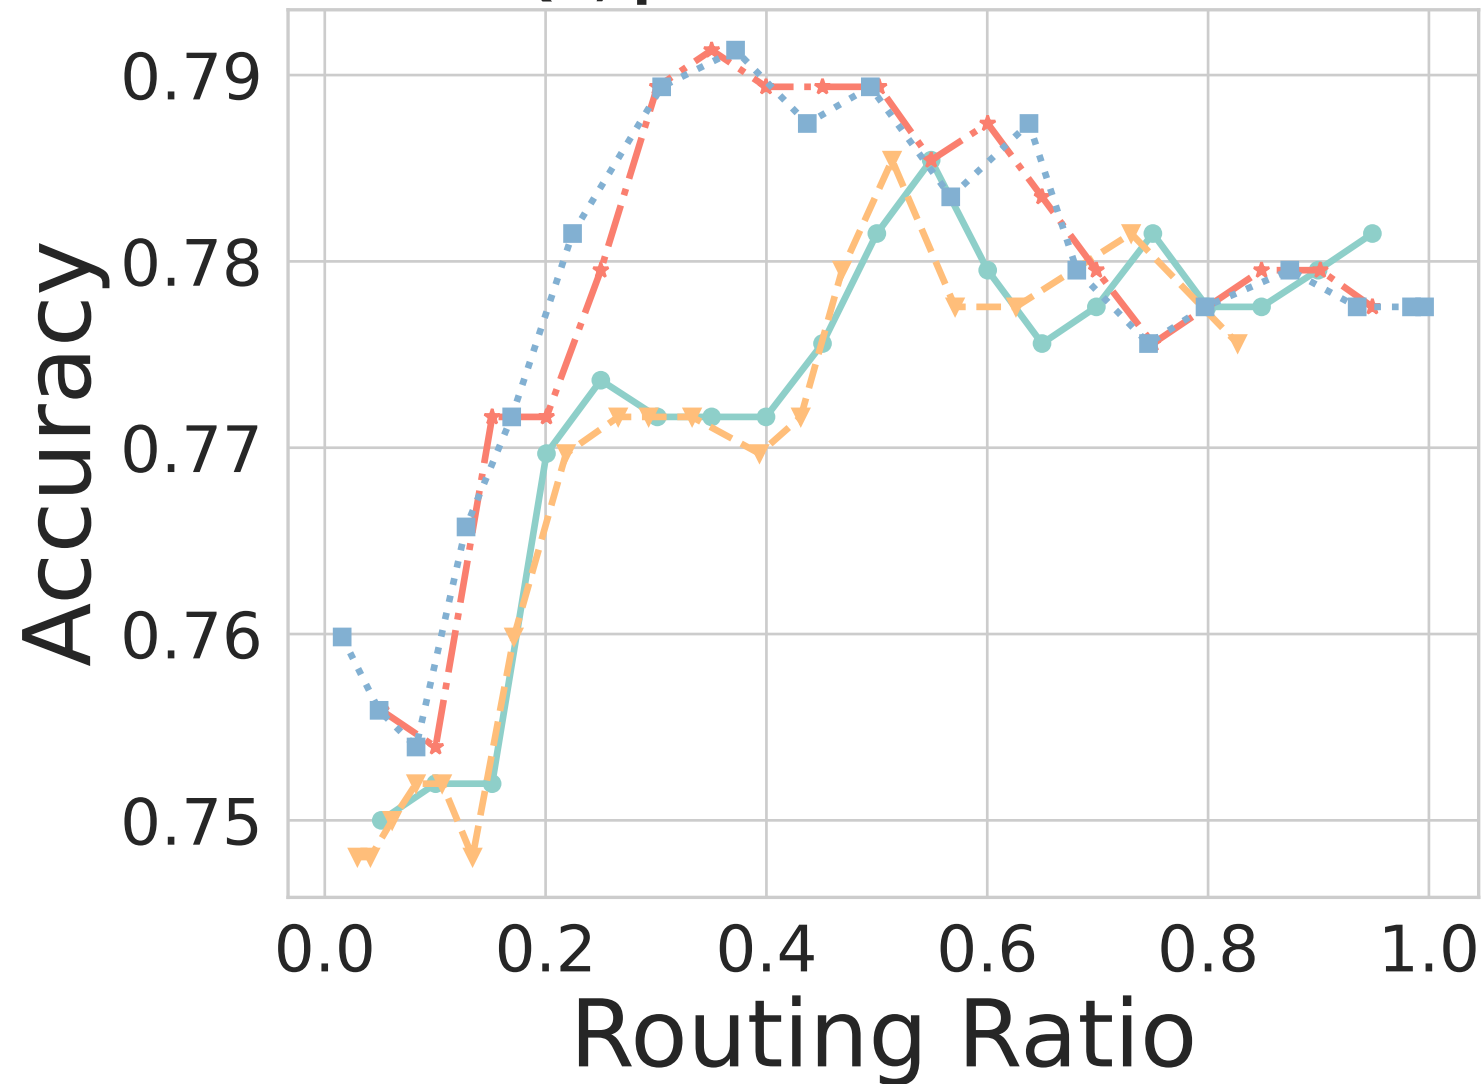

Supplement: supplementary_material [file cali_down_social_i_qa_phi-3.5-mini_gpt-4.1-mini.pdf › Routing_SLM_LLMs/Proxy_routing_prediction/to_gpt-4.1-mini/social_i_qa_as_downstream/cali_down_social_i_qa_phi-3.5-mini_gpt-4.1-mini.pdf]

**Social IQa, phi-4-mini-reasoning to GPT-4.1 mini**

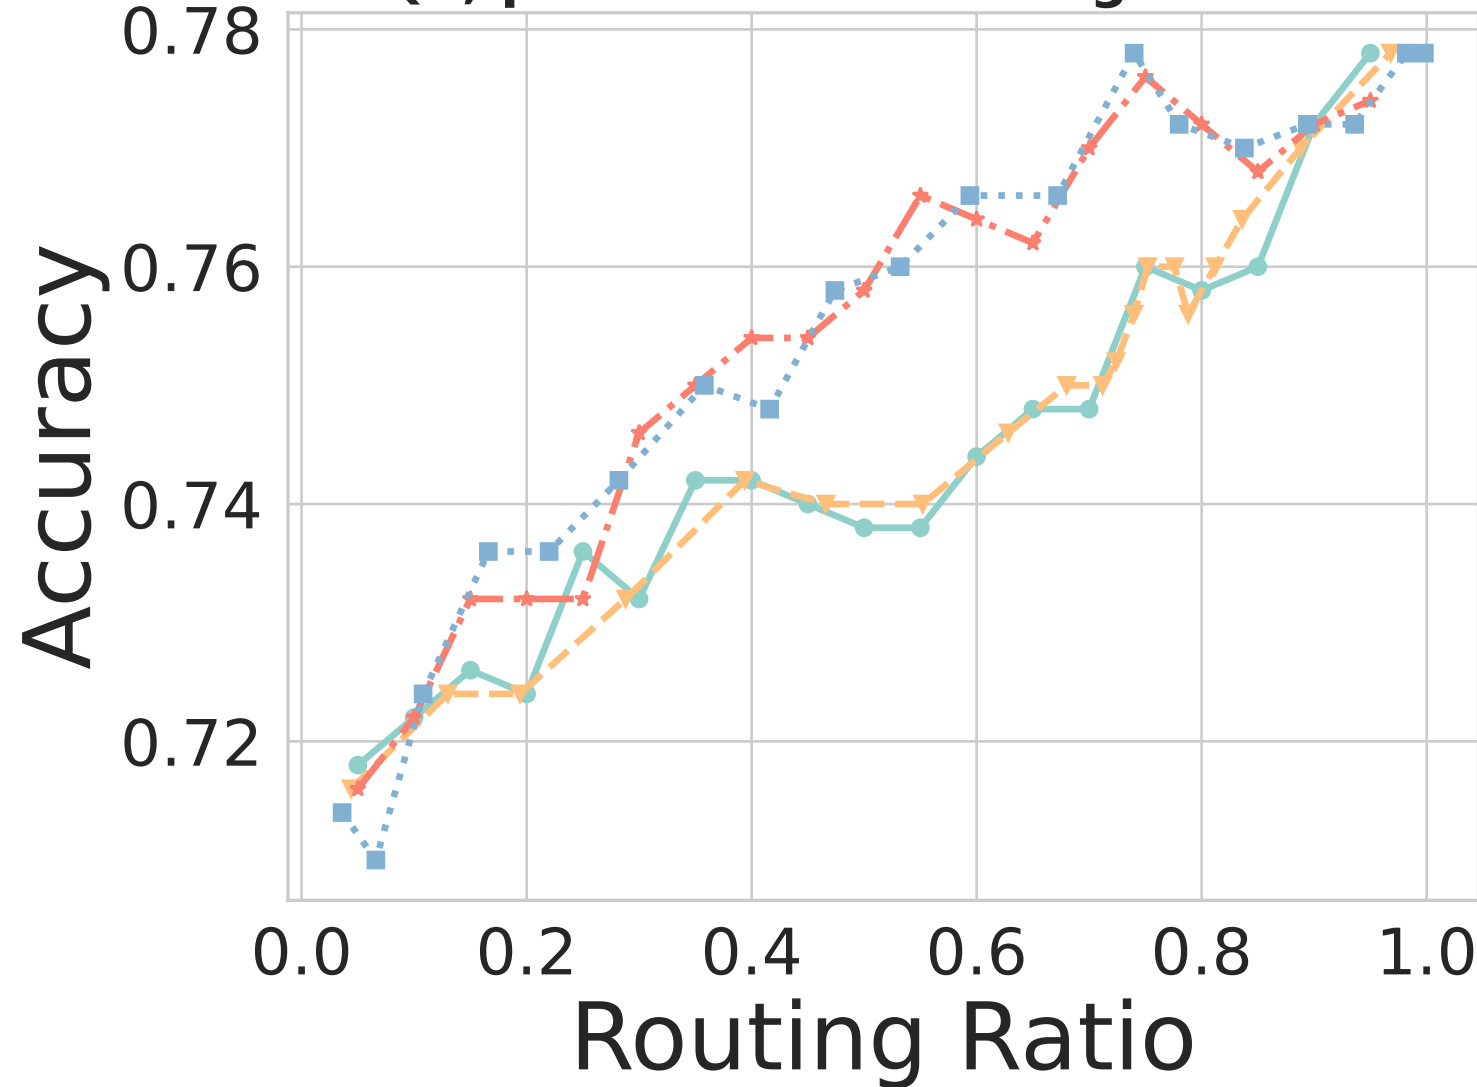

Supplement: supplementary_material [file cali_down_social_i_qa_phi-4-mini-reasoning_gpt-4.1-mini.pdf › Routing_SLM_LLMs/Proxy_routing_prediction/to_gpt-4.1-mini/social_i_qa_as_downstream/cali_down_social_i_qa_phi-4-mini-reasoning_gpt-4.1-mini.pdf]

**Social IQa, qwen-2.5-7b to GPT-4.1 mini**

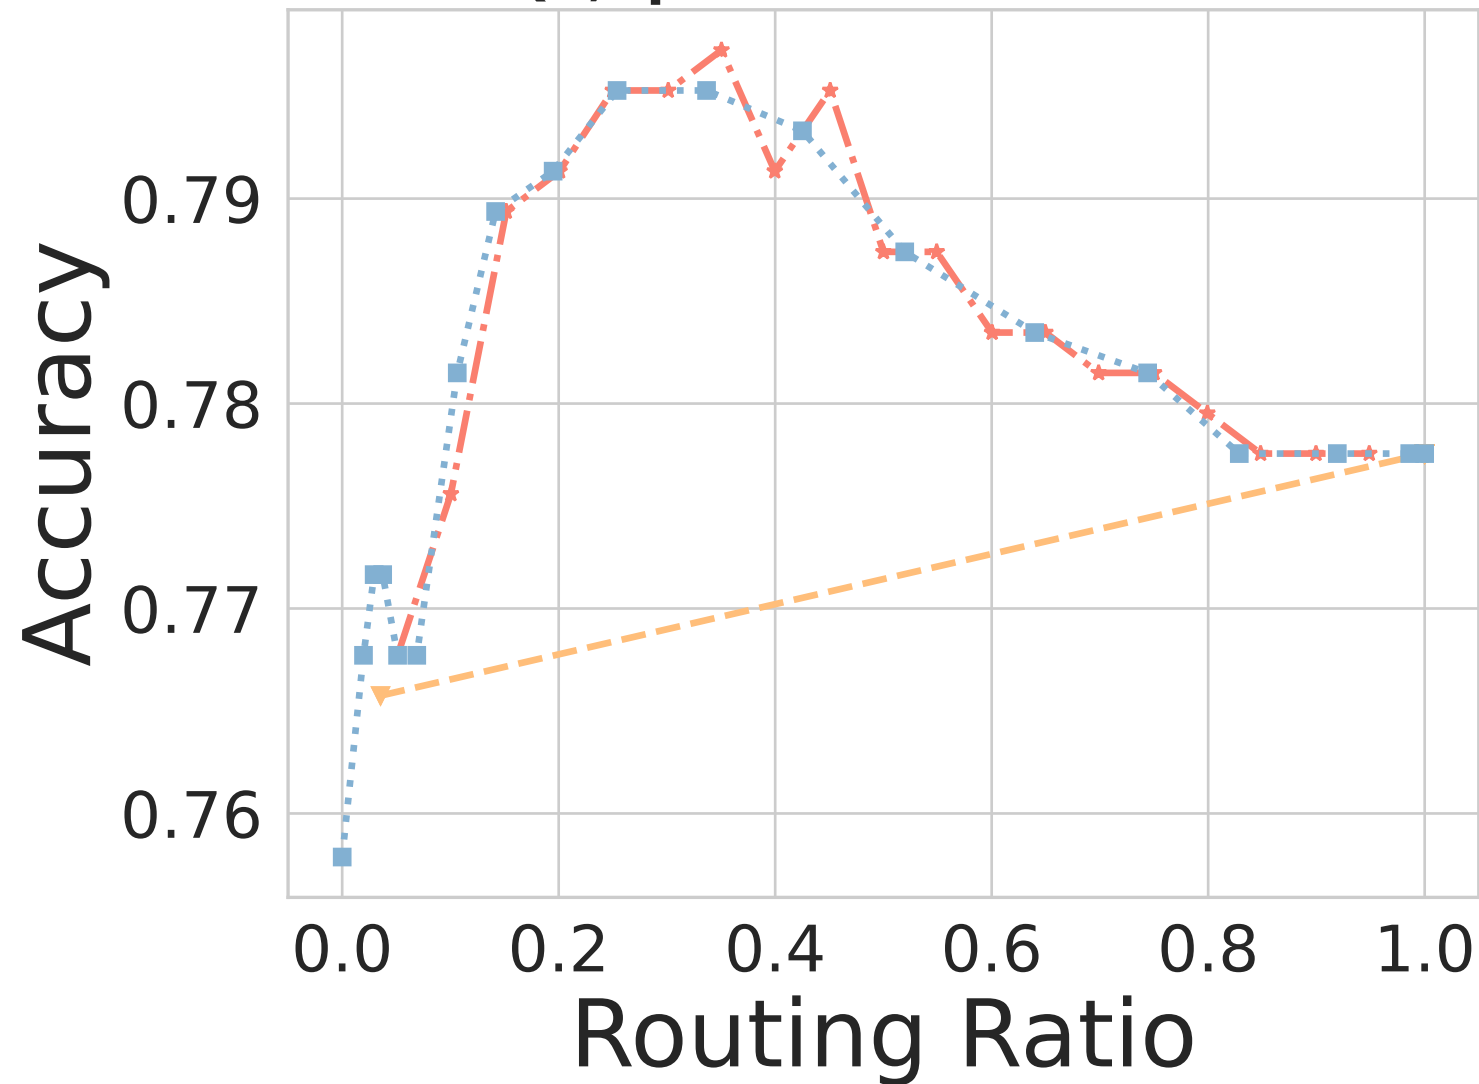

Supplement: supplementary_material [file cali_down_social_i_qa_qwen-2.5-7b_gpt-4.1-mini.pdf › Routing_SLM_LLMs/Proxy_routing_prediction/to_gpt-4.1-mini/social_i_qa_as_downstream/cali_down_social_i_qa_qwen-2.5-7b_gpt-4.1-mini.pdf]

**Social IQa, rwkv to GPT-4.1 mini**

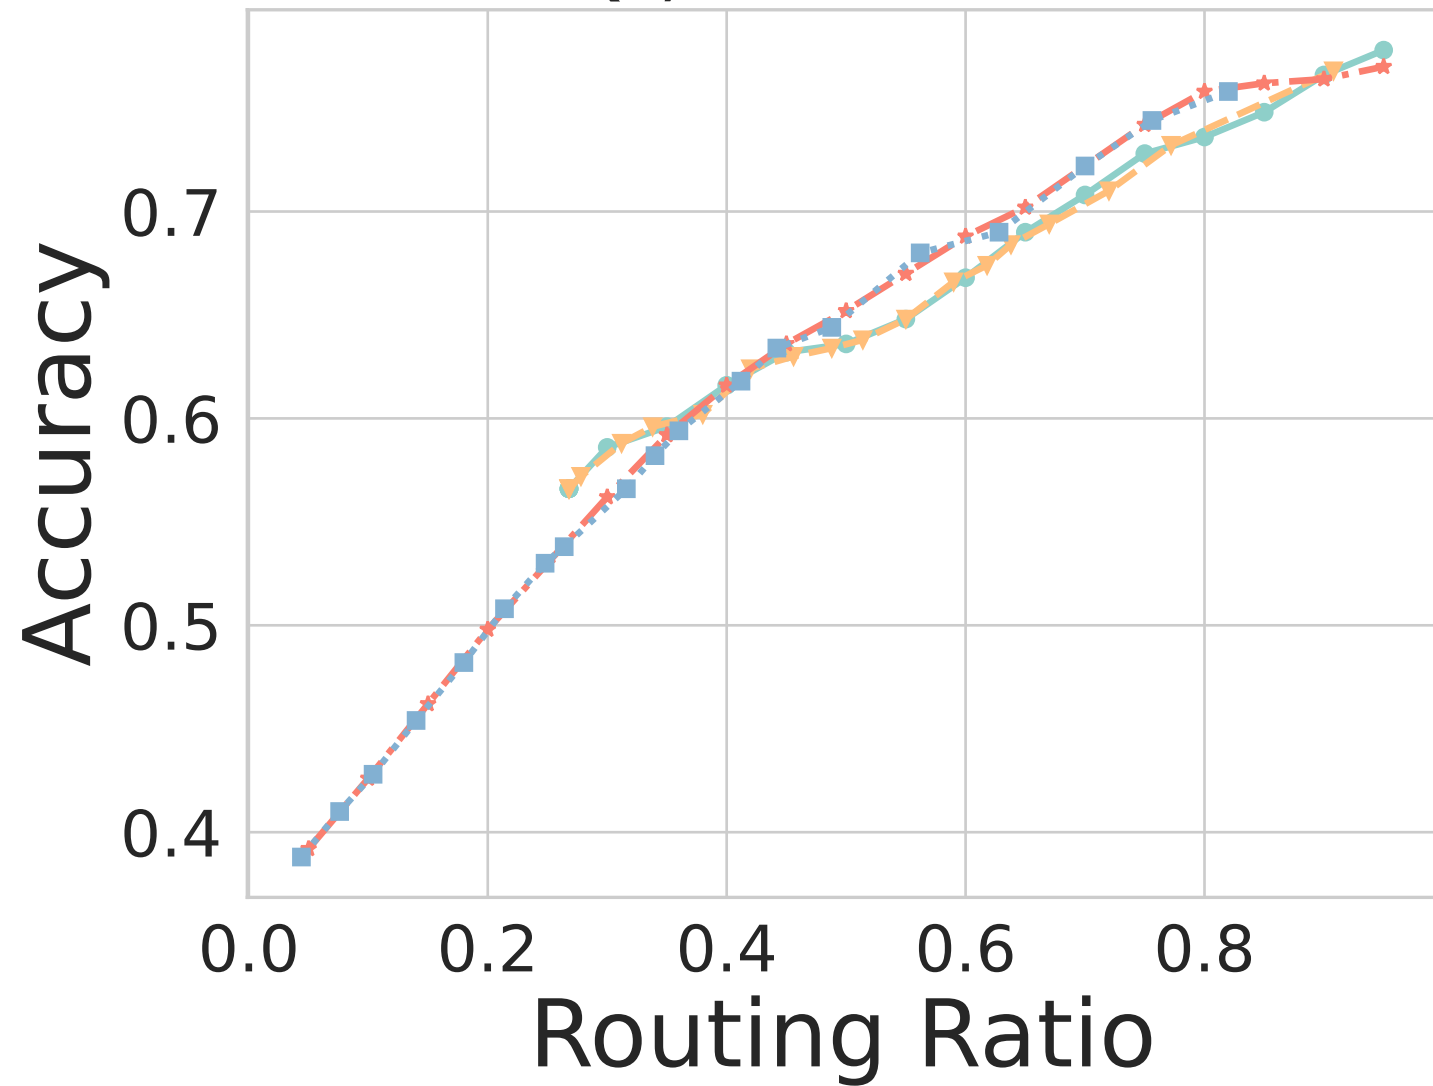

Supplement: supplementary_material [file cali_down_social_i_qa_rwkv_gpt-4.1-mini.pdf › Routing_SLM_LLMs/Proxy_routing_prediction/to_gpt-4.1-mini/social_i_qa_as_downstream/cali_down_social_i_qa_rwkv_gpt-4.1-mini.pdf]

**SVAMP, Qwen3-0.6B to GPT-4.1 mini**

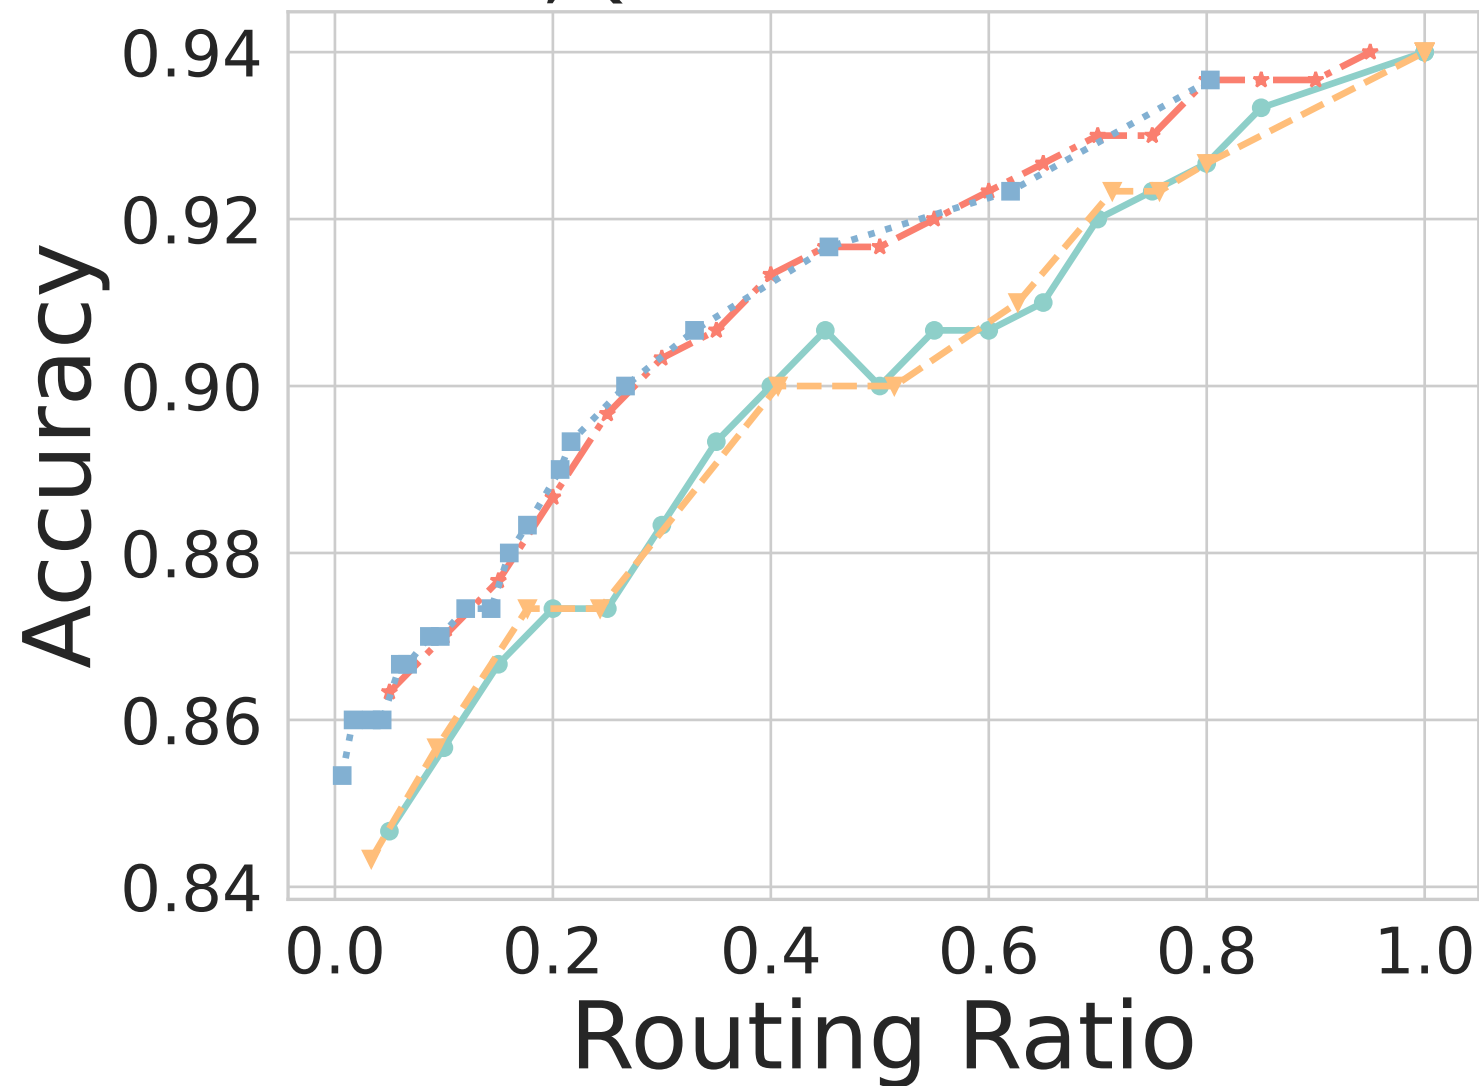

Supplement: supplementary_material [file cali_down_svamp_Qwen3-0.6B_gpt-4.1-mini.pdf › Routing_SLM_LLMs/Proxy_routing_prediction/to_gpt-4.1-mini/svamp_as_downstream/cali_down_svamp_Qwen3-0.6B_gpt-4.1-mini.pdf]

**SVAMP, Qwen3-1.7B to GPT-4.1 mini**

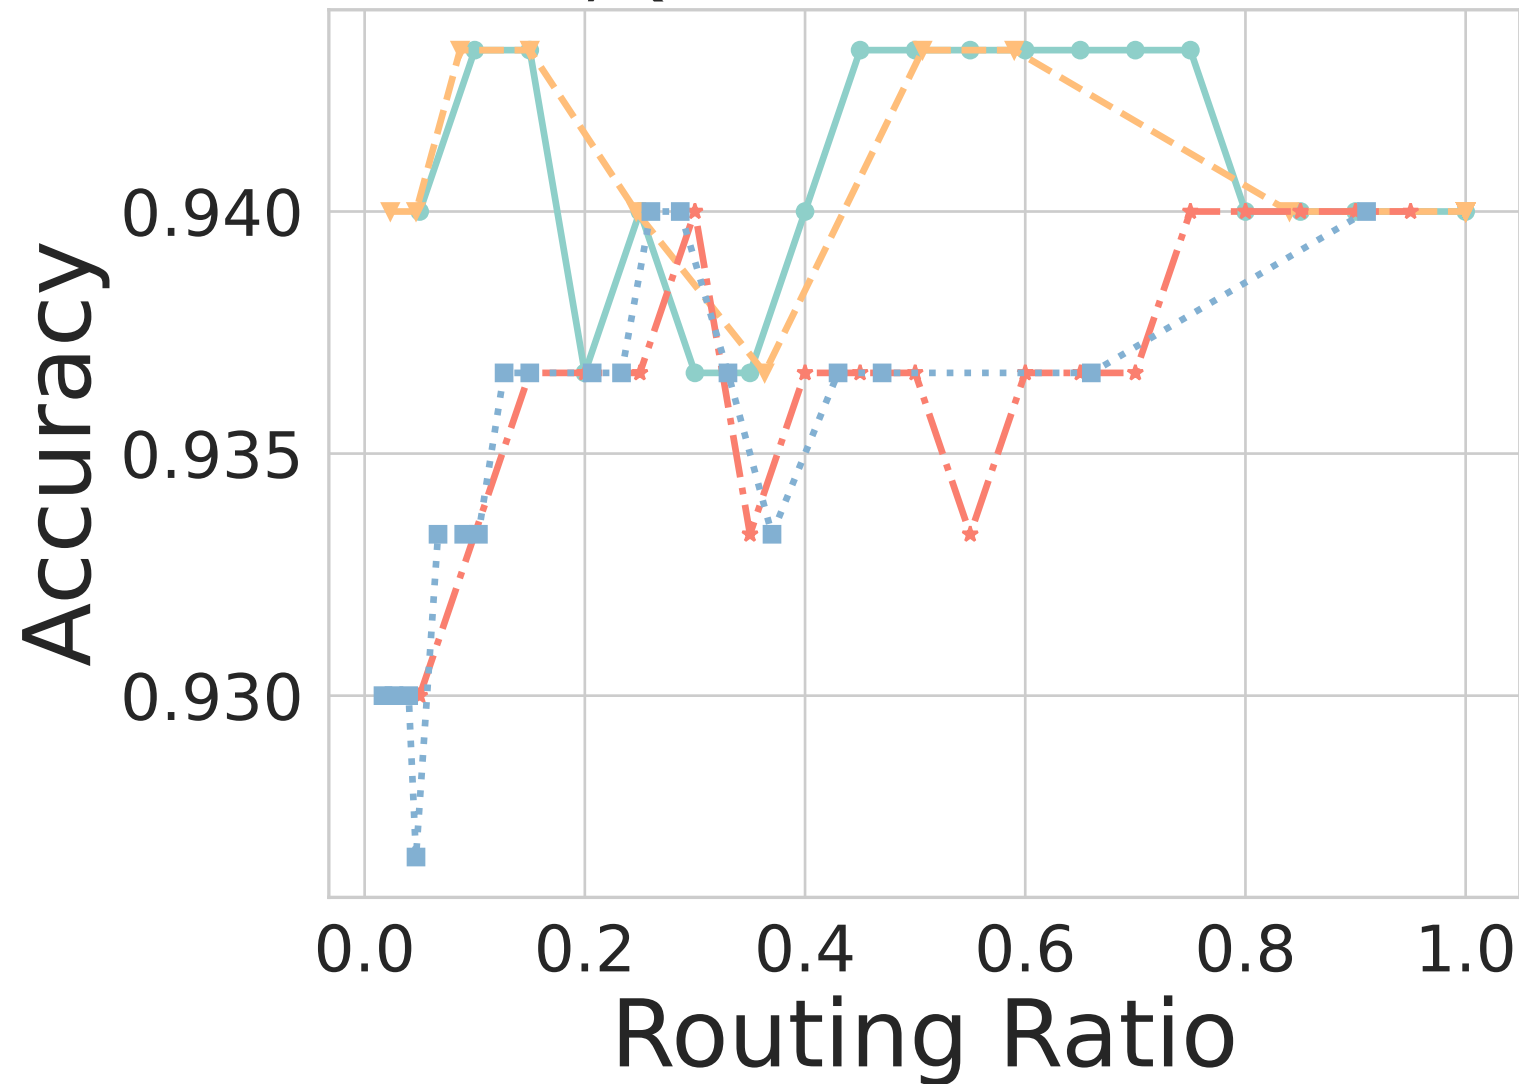

Supplement: supplementary_material [file cali_down_svamp_Qwen3-1.7B_gpt-4.1-mini.pdf › Routing_SLM_LLMs/Proxy_routing_prediction/to_gpt-4.1-mini/svamp_as_downstream/cali_down_svamp_Qwen3-1.7B_gpt-4.1-mini.pdf]

**SVAMP, Qwen3-4B to GPT-4.1 mini**

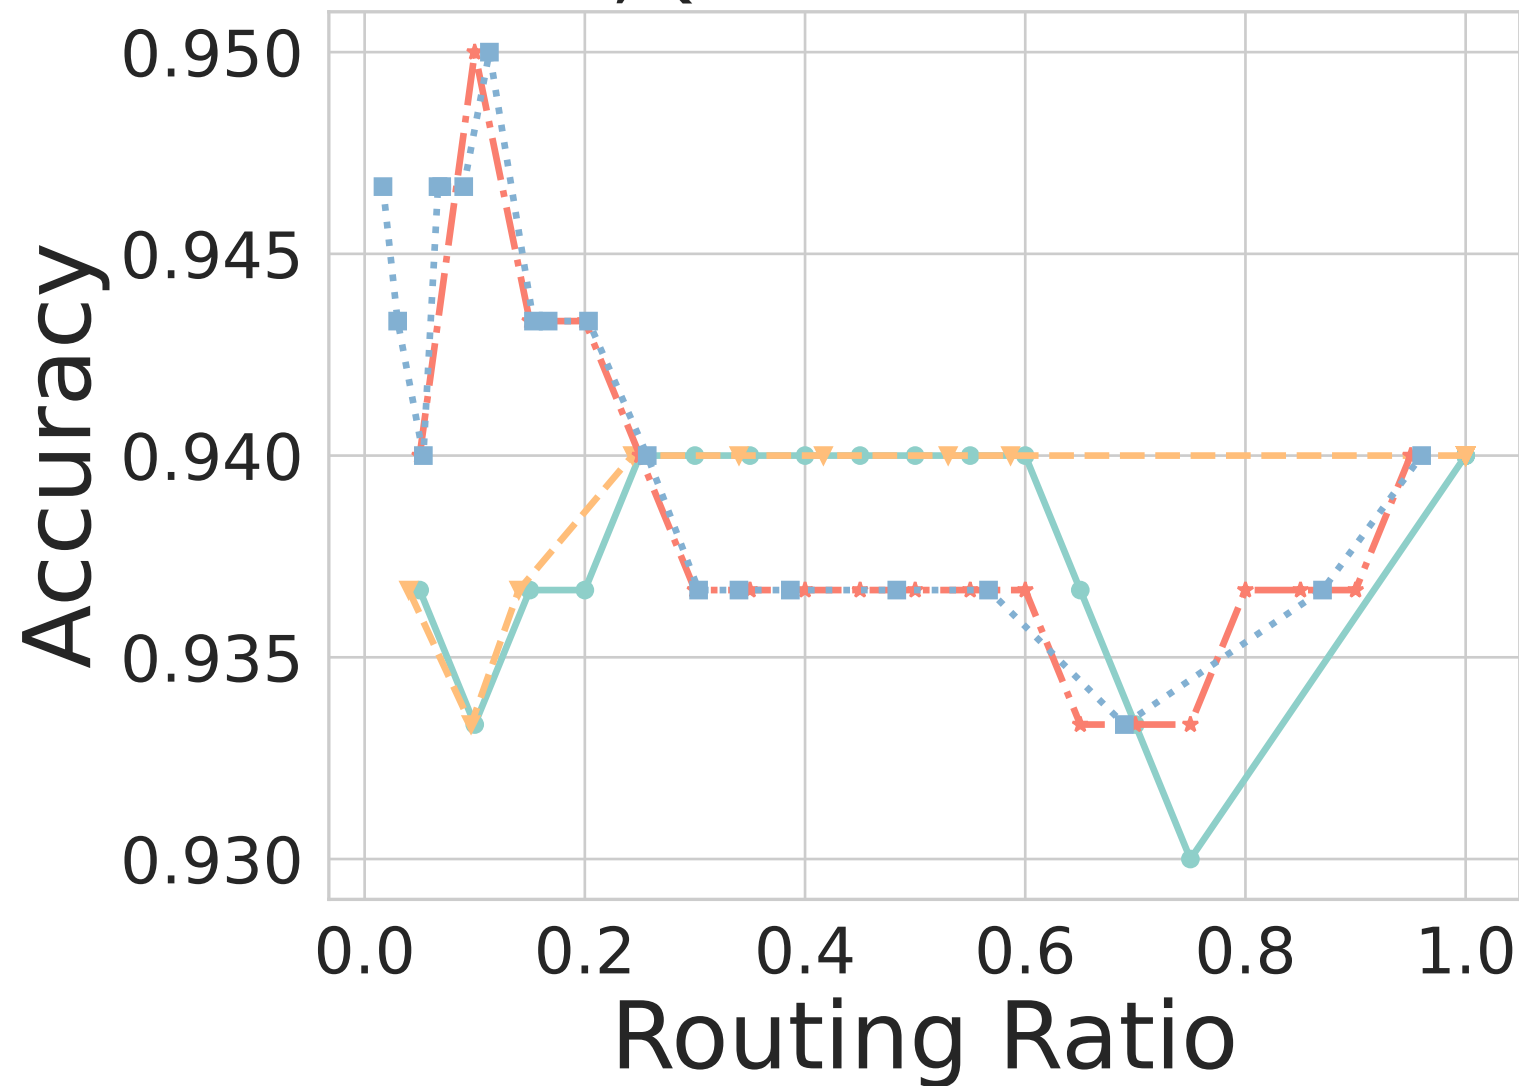

Supplement: supplementary_material [file cali_down_svamp_Qwen3-4B_gpt-4.1-mini.pdf › Routing_SLM_LLMs/Proxy_routing_prediction/to_gpt-4.1-mini/svamp_as_downstream/cali_down_svamp_Qwen3-4B_gpt-4.1-mini.pdf]

**SVAMP, granite-3.1-8b to GPT-4.1 mini**

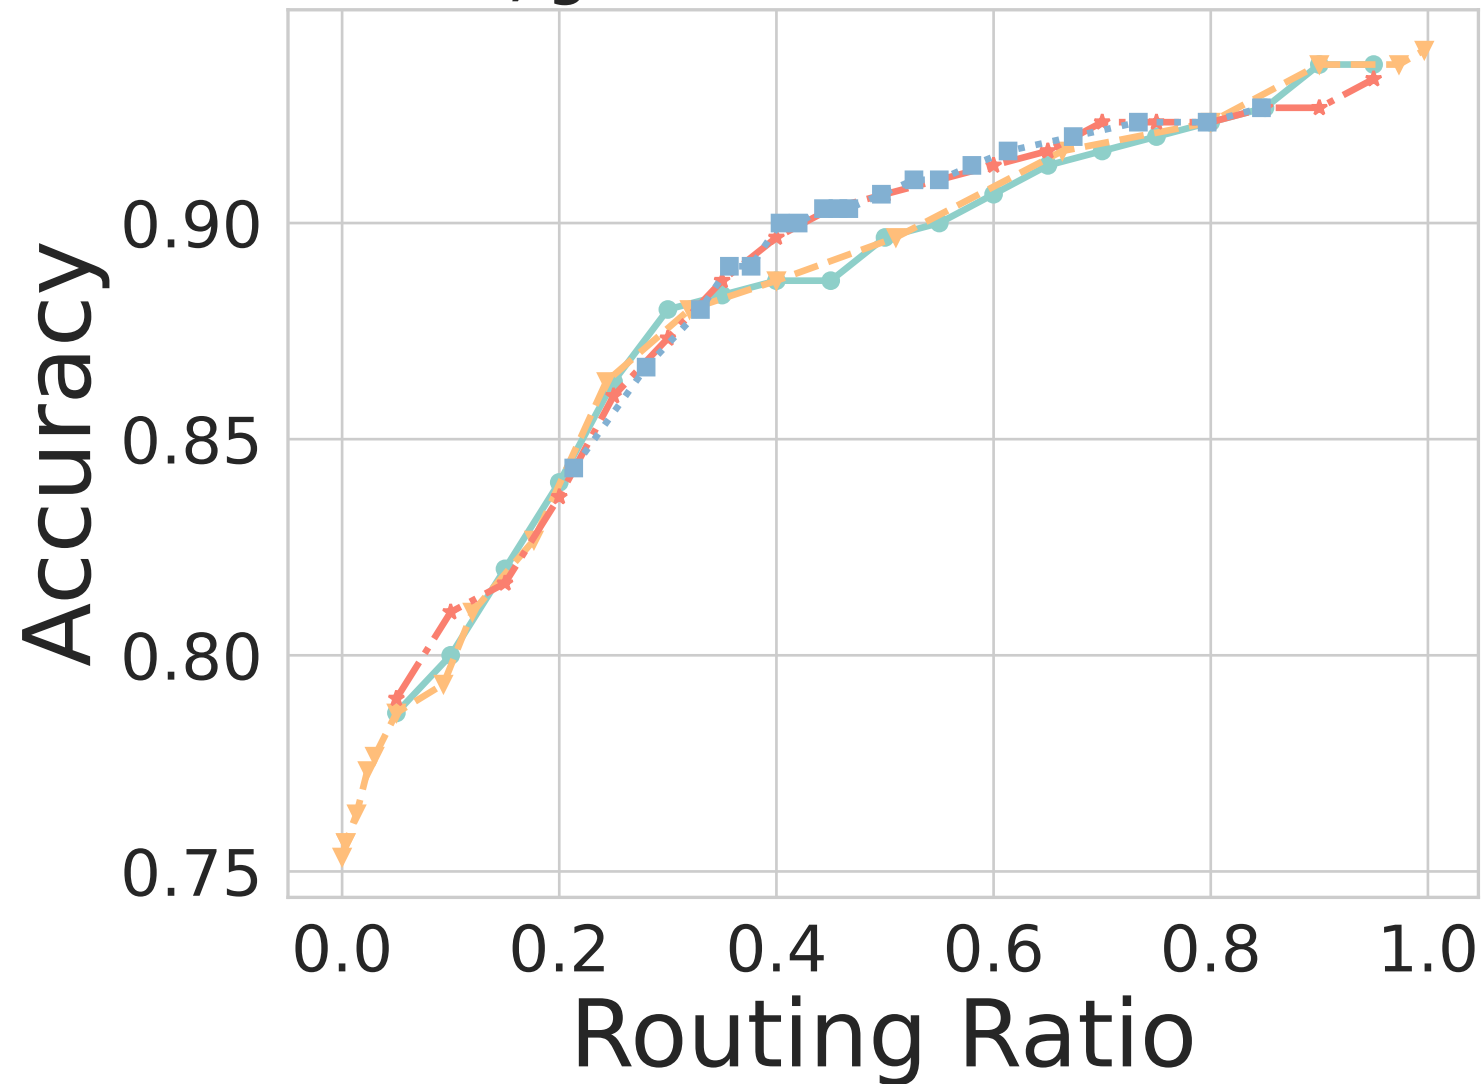

Supplement: supplementary_material [file cali_down_svamp_granite-3.1-8b_gpt-4.1-mini.pdf › Routing_SLM_LLMs/Proxy_routing_prediction/to_gpt-4.1-mini/svamp_as_downstream/cali_down_svamp_granite-3.1-8b_gpt-4.1-mini.pdf]

**SVAMP, llama-3.1-8b to GPT-4.1 mini**

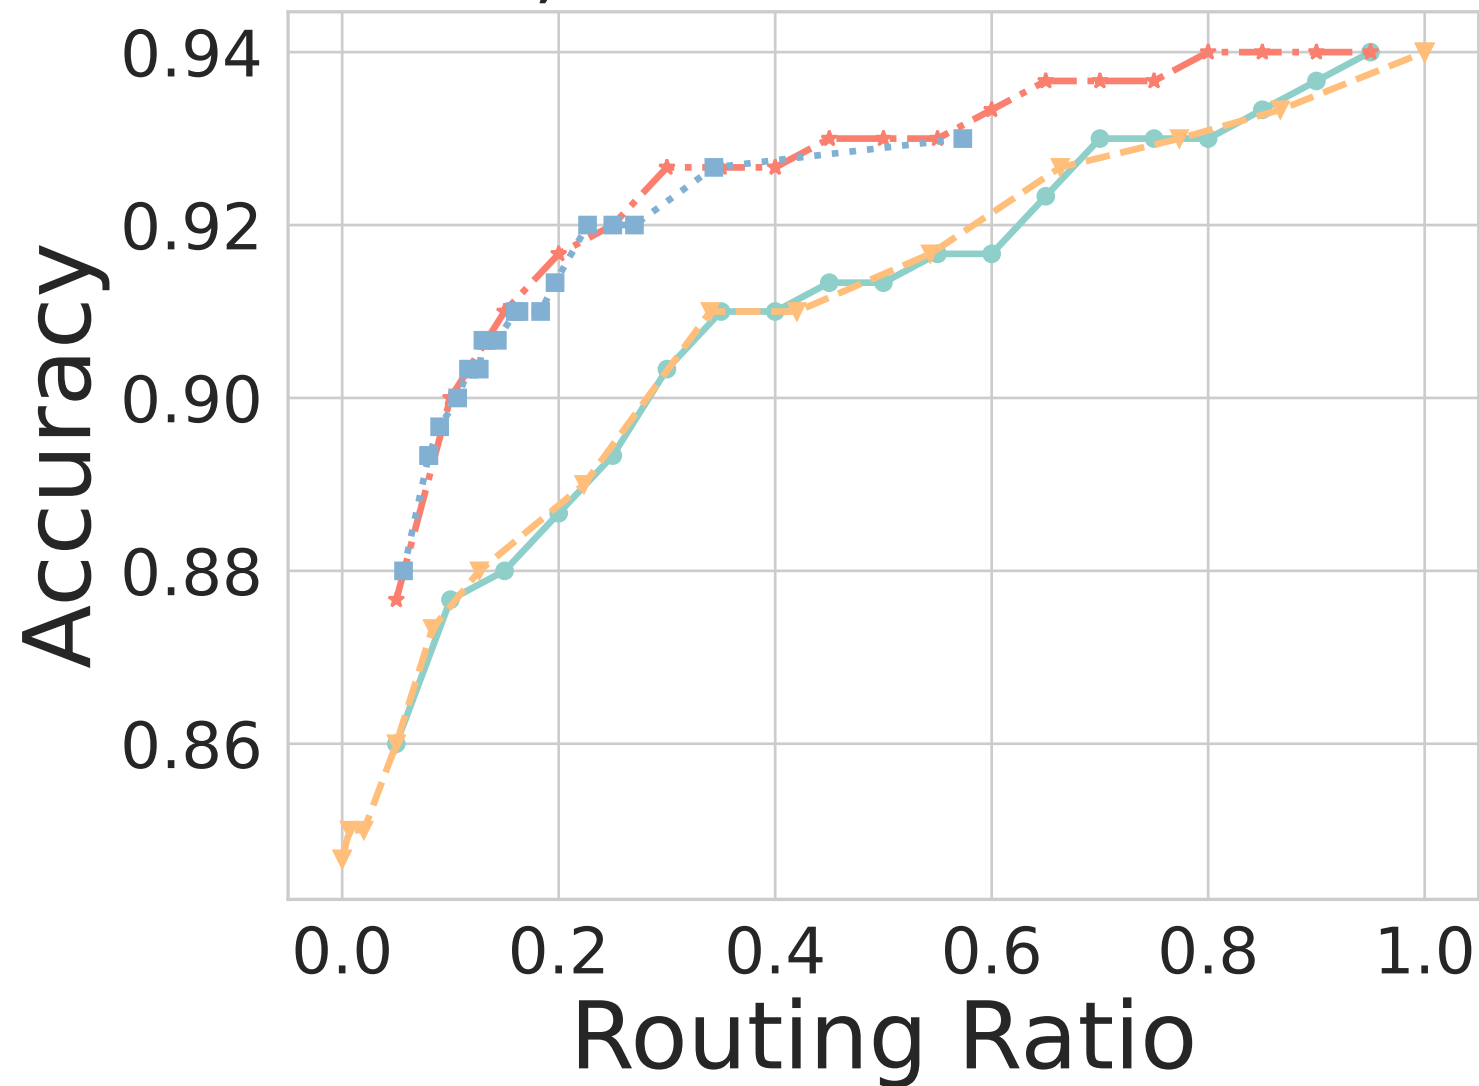

Supplement: supplementary_material [file cali_down_svamp_llama-3.1-8b_gpt-4.1-mini.pdf › Routing_SLM_LLMs/Proxy_routing_prediction/to_gpt-4.1-mini/svamp_as_downstream/cali_down_svamp_llama-3.1-8b_gpt-4.1-mini.pdf]

**SVAMP, llama-3.2-1b to GPT-4.1 mini**

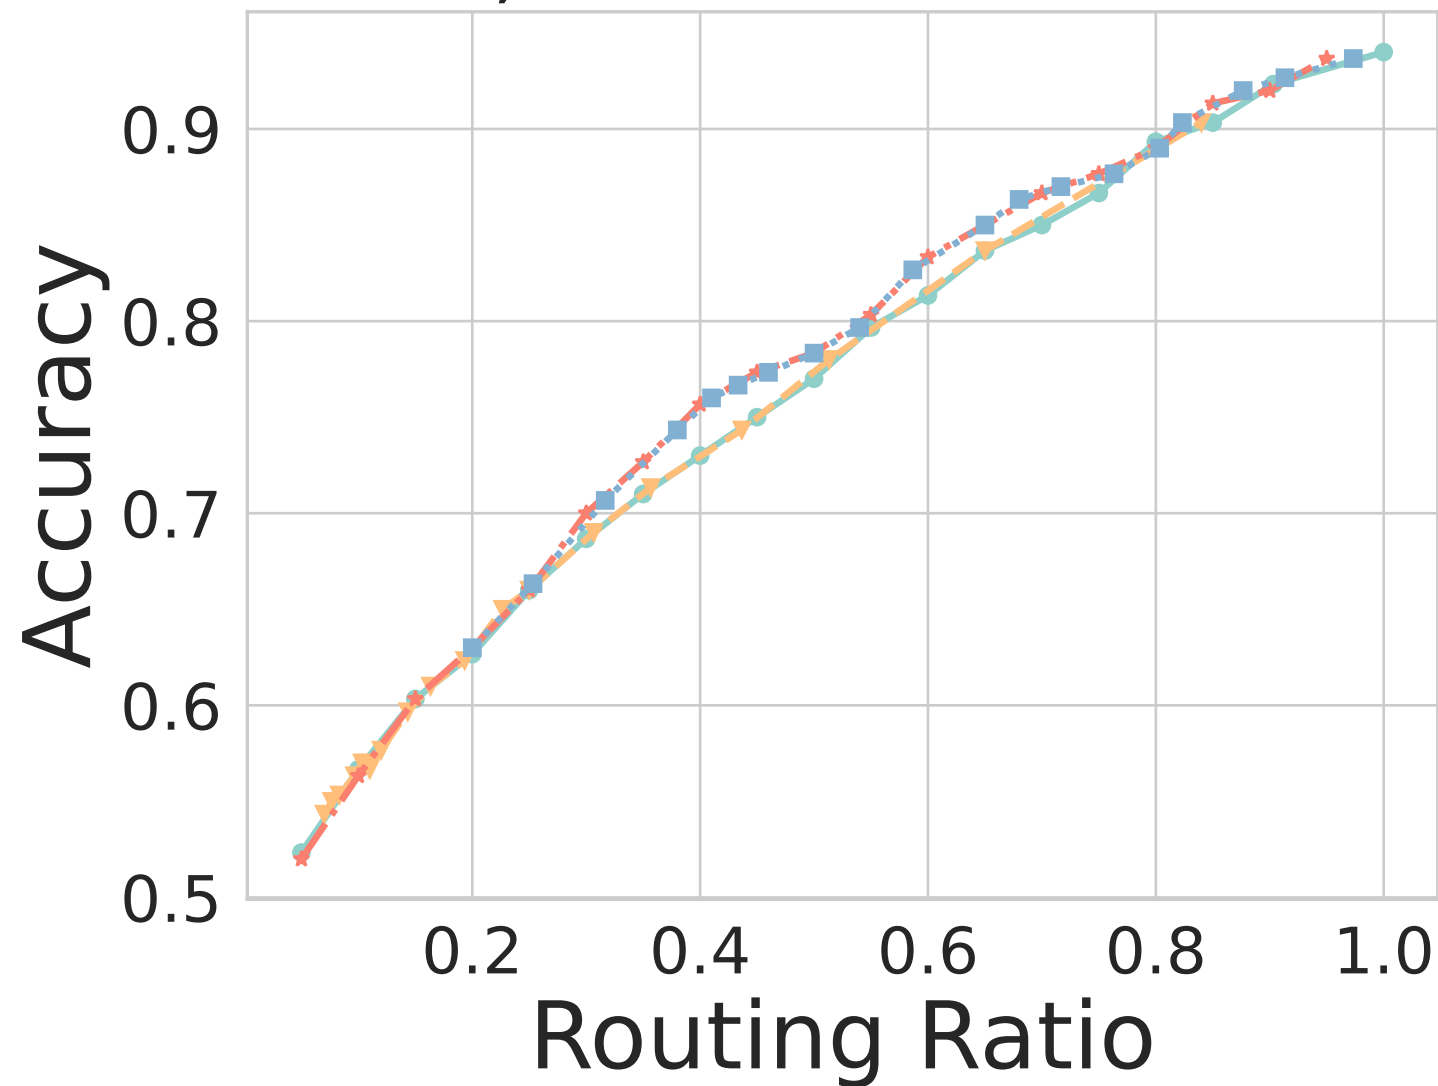

Supplement: supplementary_material [file cali_down_svamp_llama-3.2-1b_gpt-4.1-mini.pdf › Routing_SLM_LLMs/Proxy_routing_prediction/to_gpt-4.1-mini/svamp_as_downstream/cali_down_svamp_llama-3.2-1b_gpt-4.1-mini.pdf]

**SVAMP, llama-3.2-3b to GPT-4.1 mini**

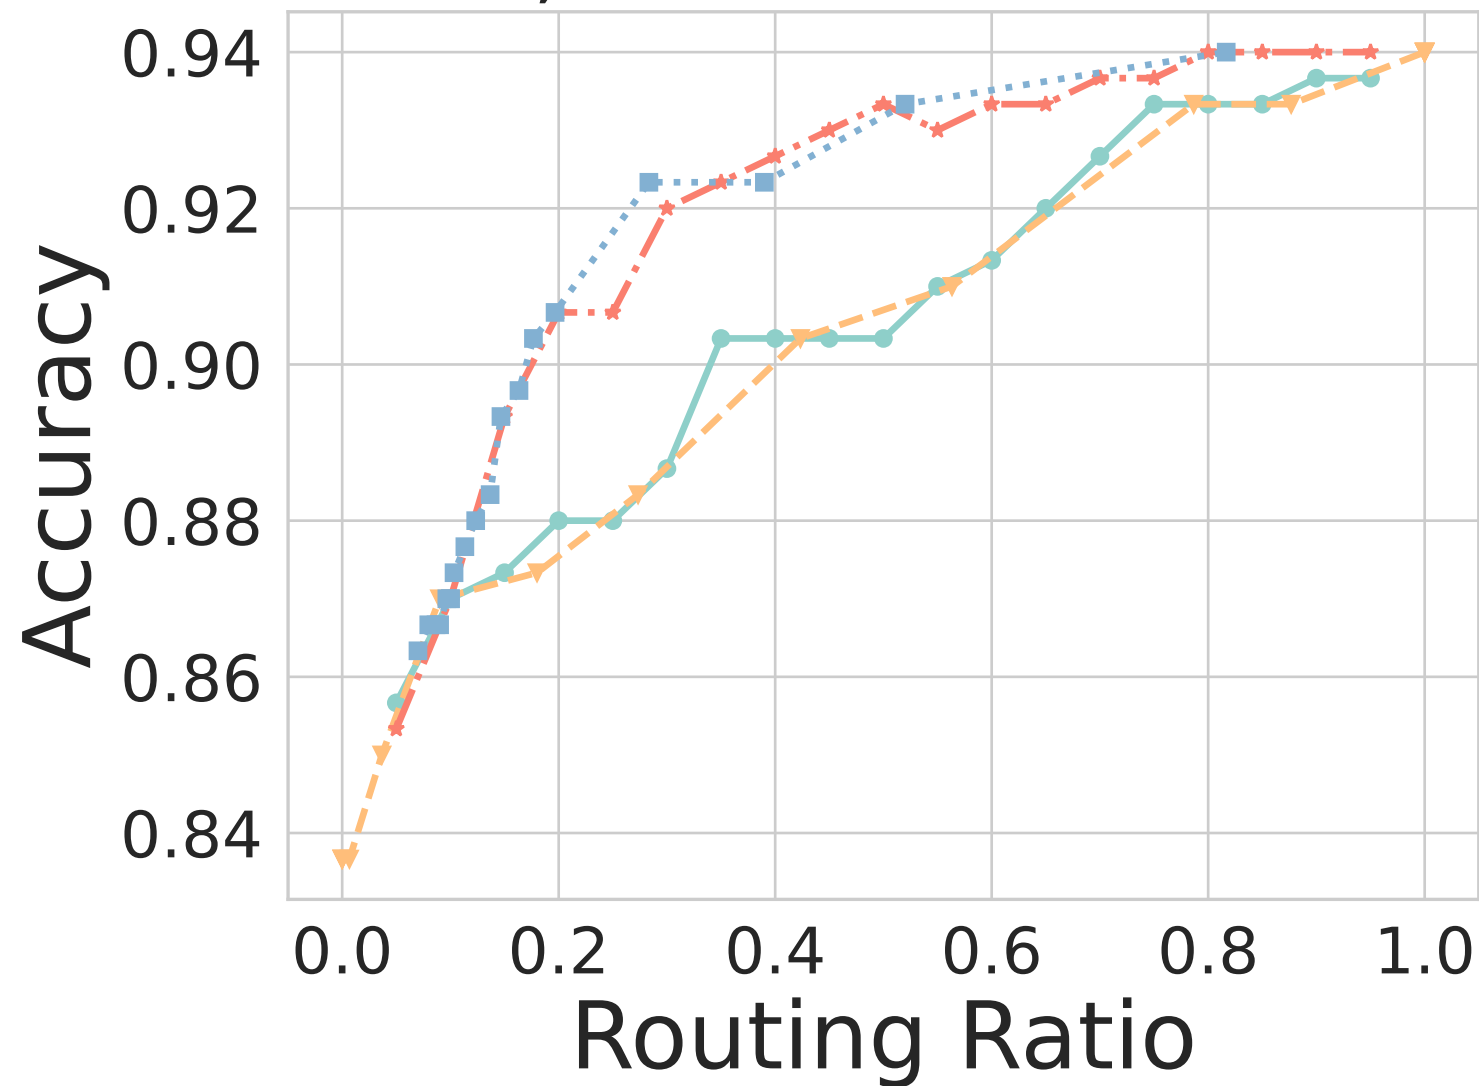

Supplement: supplementary_material [file cali_down_svamp_llama-3.2-3b_gpt-4.1-mini.pdf › Routing_SLM_LLMs/Proxy_routing_prediction/to_gpt-4.1-mini/svamp_as_downstream/cali_down_svamp_llama-3.2-3b_gpt-4.1-mini.pdf]

**SVAMP, mistral-7b to GPT-4.1 mini**

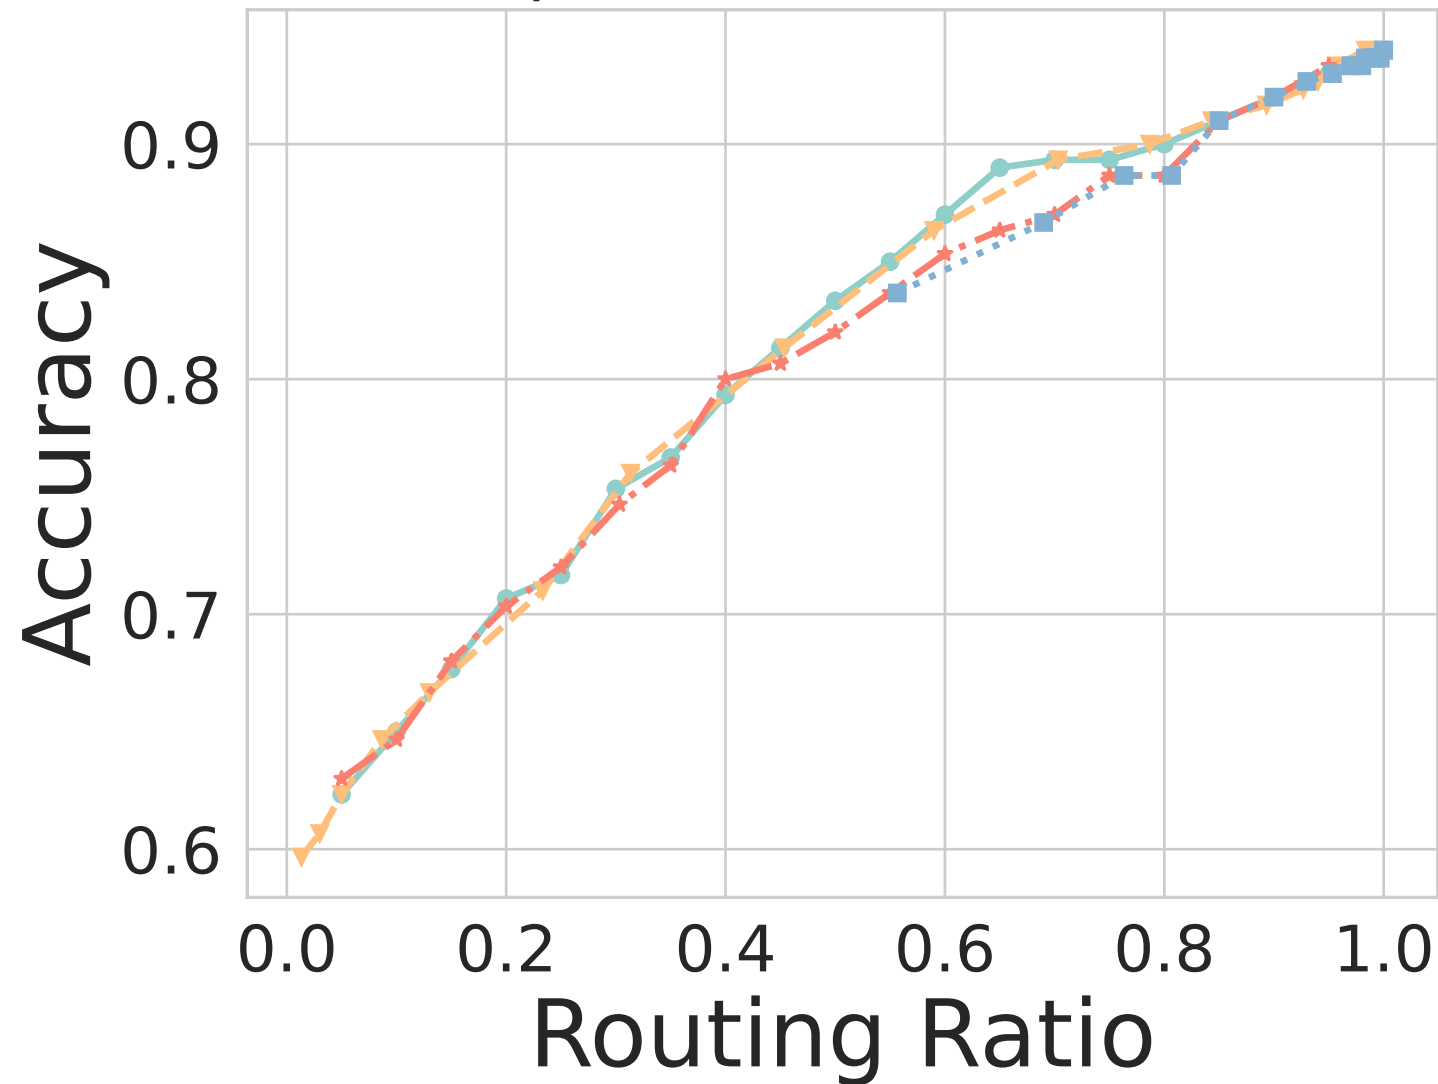

Supplement: supplementary_material [file cali_down_svamp_mistral-7b_gpt-4.1-mini.pdf › Routing_SLM_LLMs/Proxy_routing_prediction/to_gpt-4.1-mini/svamp_as_downstream/cali_down_svamp_mistral-7b_gpt-4.1-mini.pdf]

**SVAMP, phi-3.5-mini to GPT-4.1 mini**

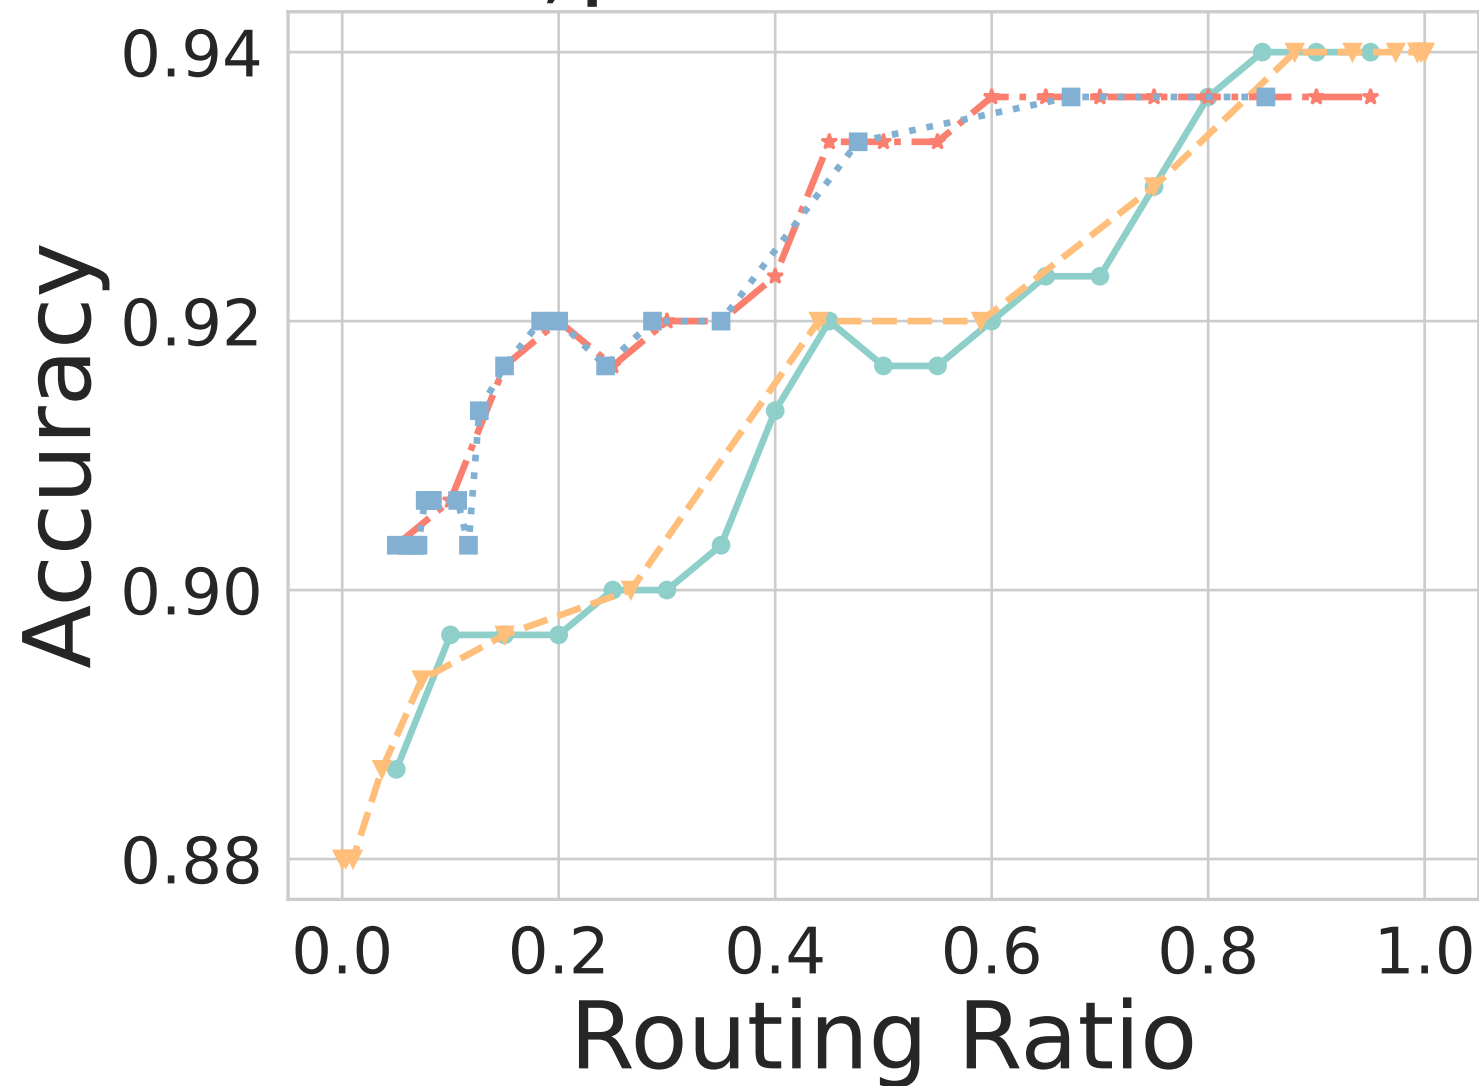

Supplement: supplementary_material [file cali_down_svamp_phi-3.5-mini_gpt-4.1-mini.pdf › Routing_SLM_LLMs/Proxy_routing_prediction/to_gpt-4.1-mini/svamp_as_downstream/cali_down_svamp_phi-3.5-mini_gpt-4.1-mini.pdf]

**SVAMP, phi-4-mini-reasoning to GPT-4.1 mini**

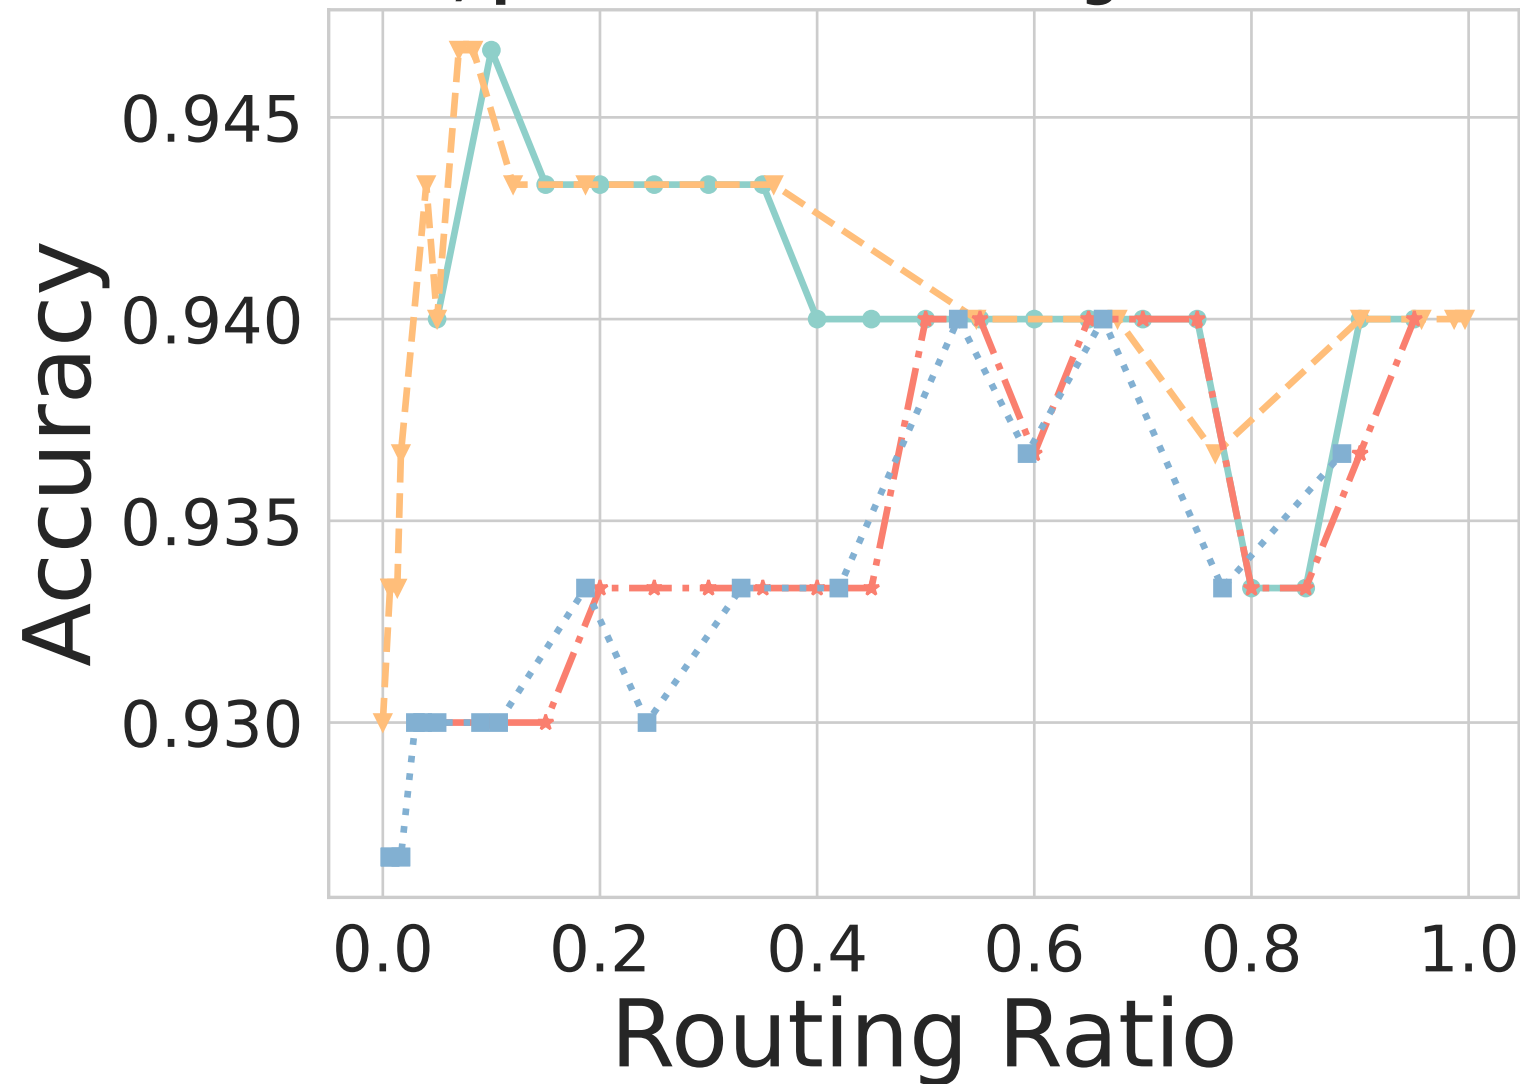

Supplement: supplementary_material [file cali_down_svamp_phi-4-mini-reasoning_gpt-4.1-mini.pdf › Routing_SLM_LLMs/Proxy_routing_prediction/to_gpt-4.1-mini/svamp_as_downstream/cali_down_svamp_phi-4-mini-reasoning_gpt-4.1-mini.pdf]

**SVAMP, qwen-2.5-7b to GPT-4.1 mini**

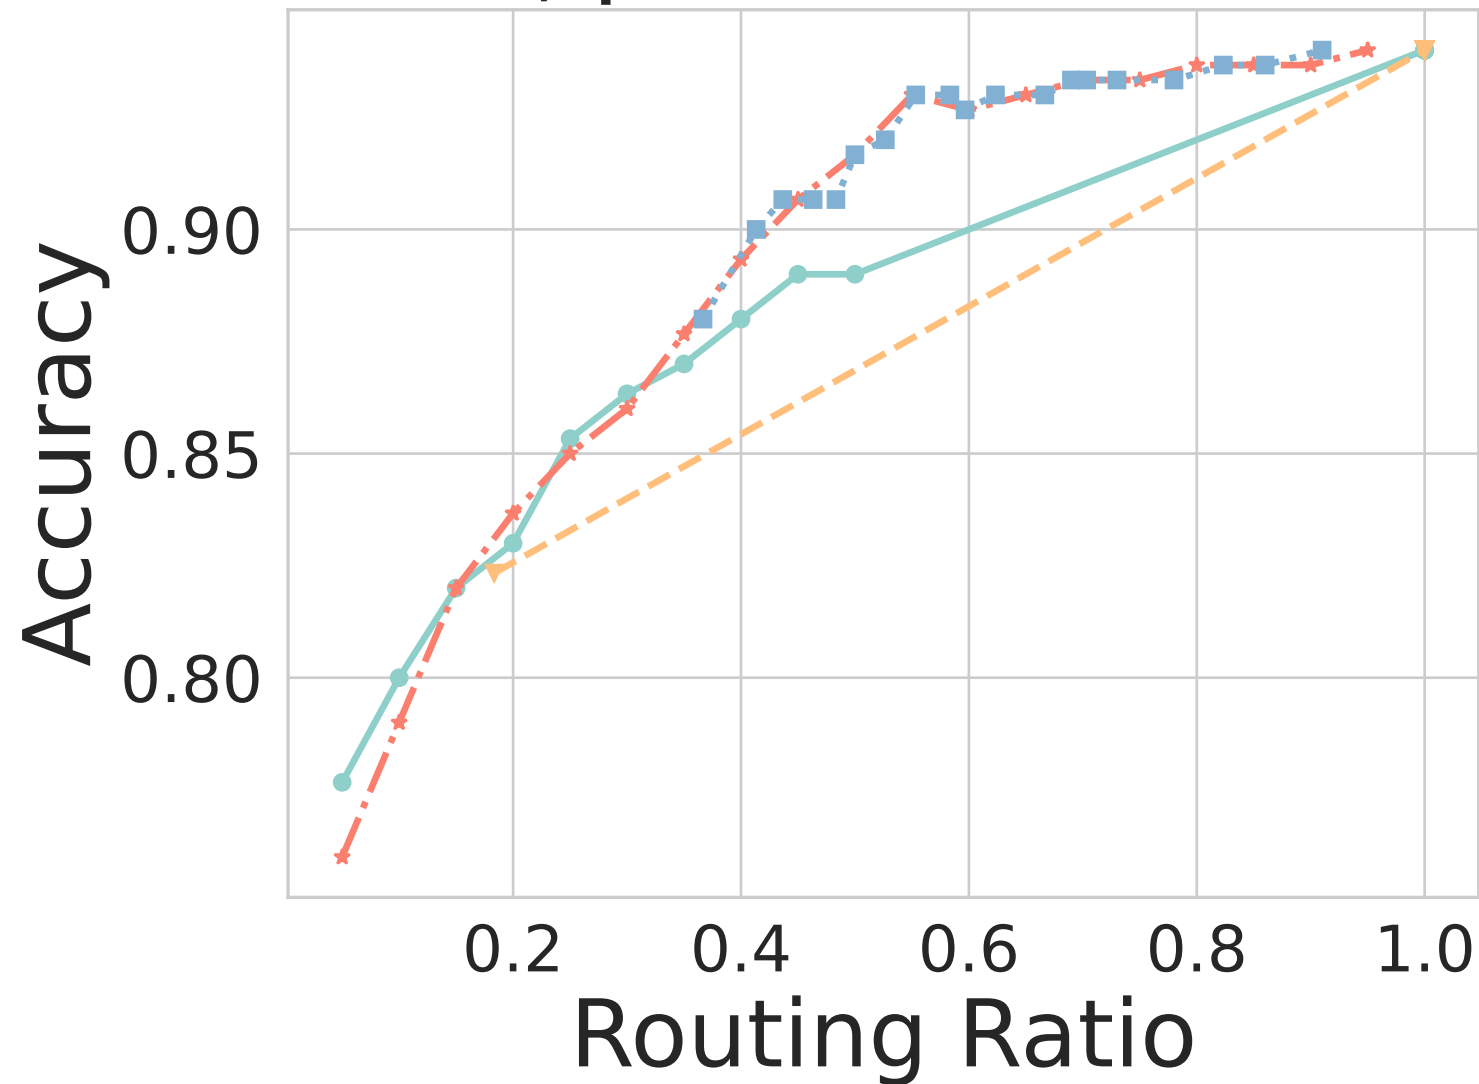

Supplement: supplementary_material [file cali_down_svamp_qwen-2.5-7b_gpt-4.1-mini.pdf › Routing_SLM_LLMs/Proxy_routing_prediction/to_gpt-4.1-mini/svamp_as_downstream/cali_down_svamp_qwen-2.5-7b_gpt-4.1-mini.pdf]

**SVAMP, rwkv to GPT-4.1 mini**

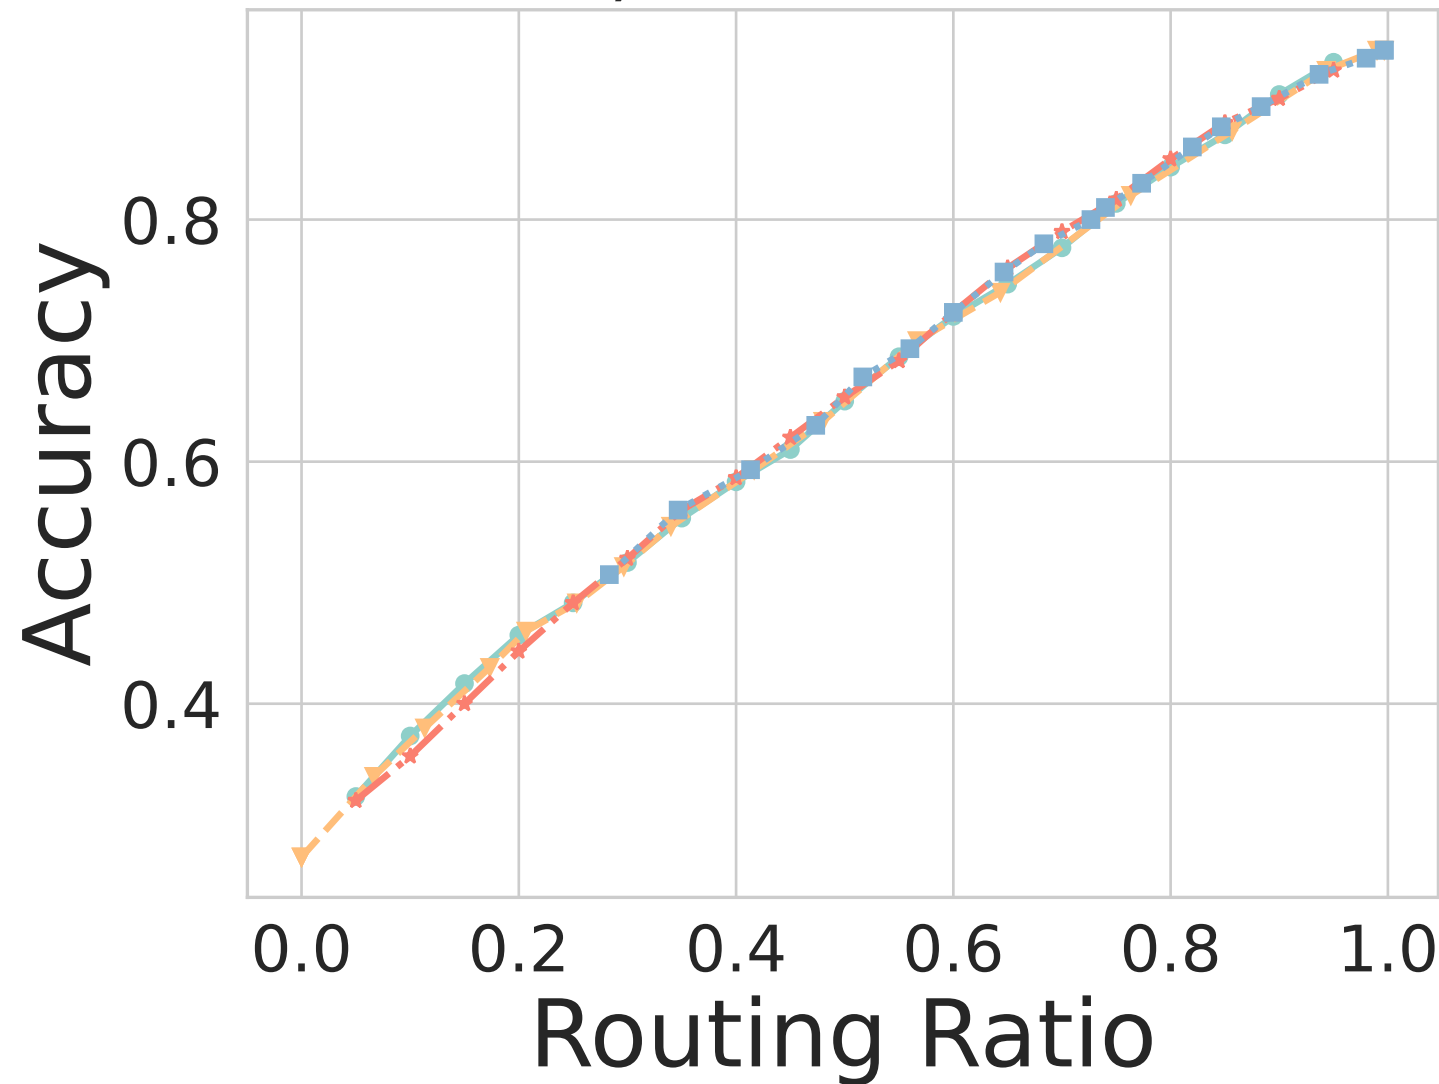

Supplement: supplementary_material [file cali_down_svamp_rwkv_gpt-4.1-mini.pdf › Routing_SLM_LLMs/Proxy_routing_prediction/to_gpt-4.1-mini/svamp_as_downstream/cali_down_svamp_rwkv_gpt-4.1-mini.pdf]

**TruthfulQA, Qwen3-0.6B to GPT-4.1 mini**

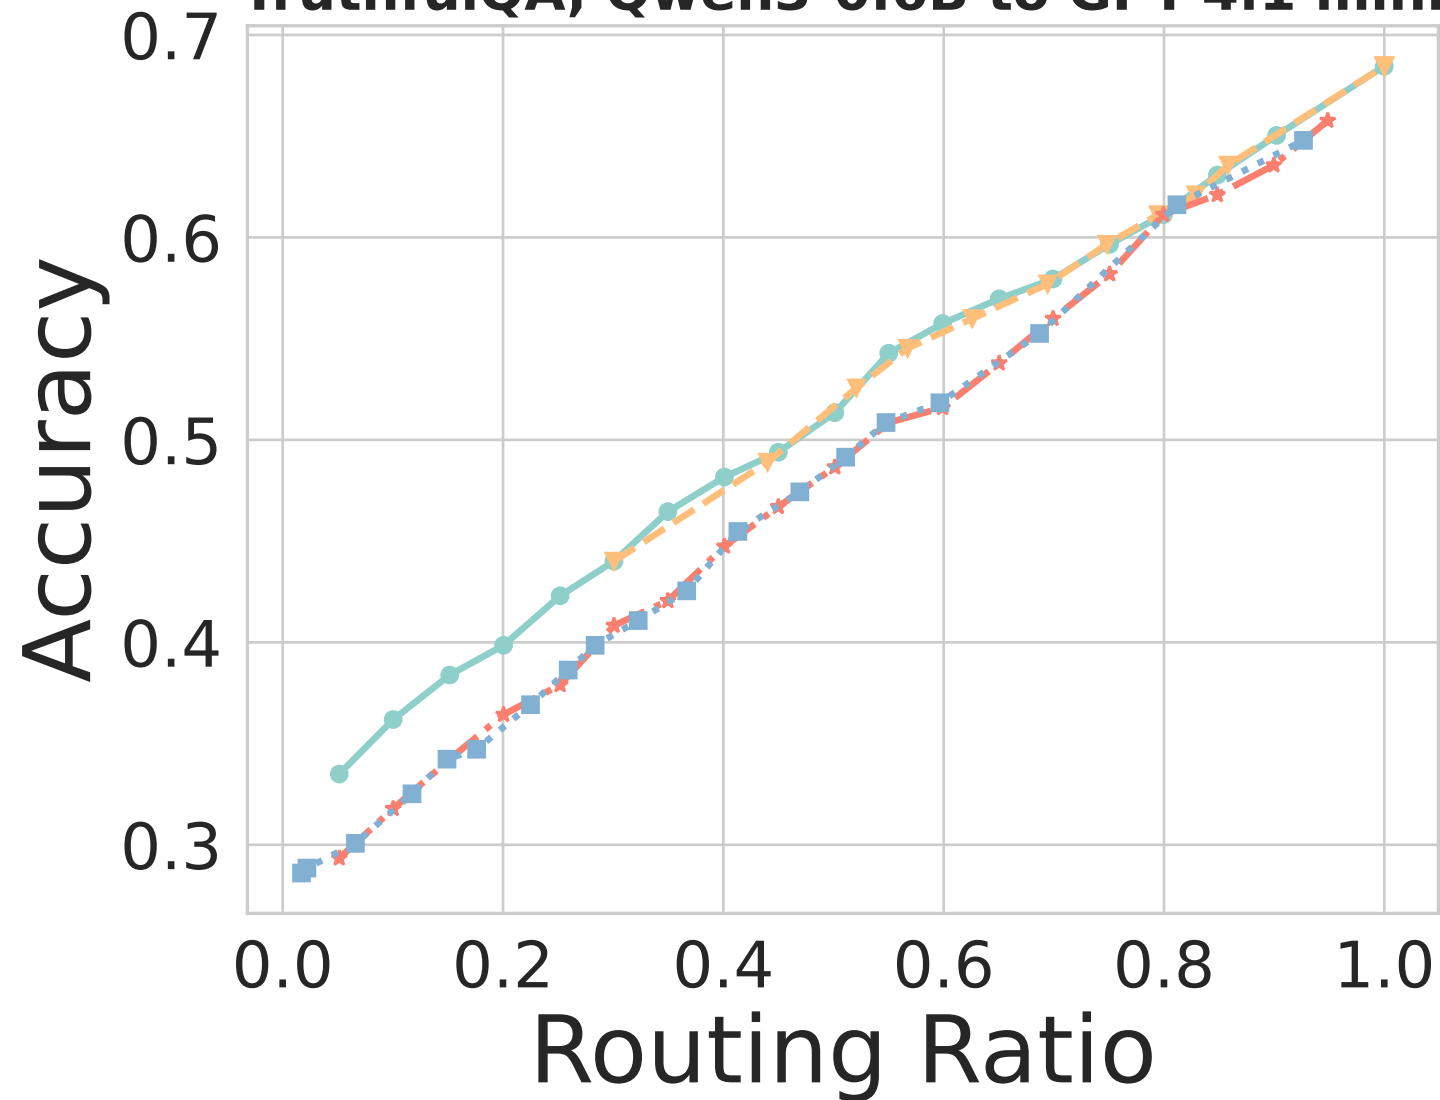

Supplement: supplementary_material [file cali_down_truthful_qa_Qwen3-0.6B_gpt-4.1-mini.pdf › Routing_SLM_LLMs/Proxy_routing_prediction/to_gpt-4.1-mini/truthful_qa_as_downstream/cali_down_truthful_qa_Qwen3-0.6B_gpt-4.1-mini.pdf]

**TruthfulQA, Qwen3-1.7B to GPT-4.1 mini**

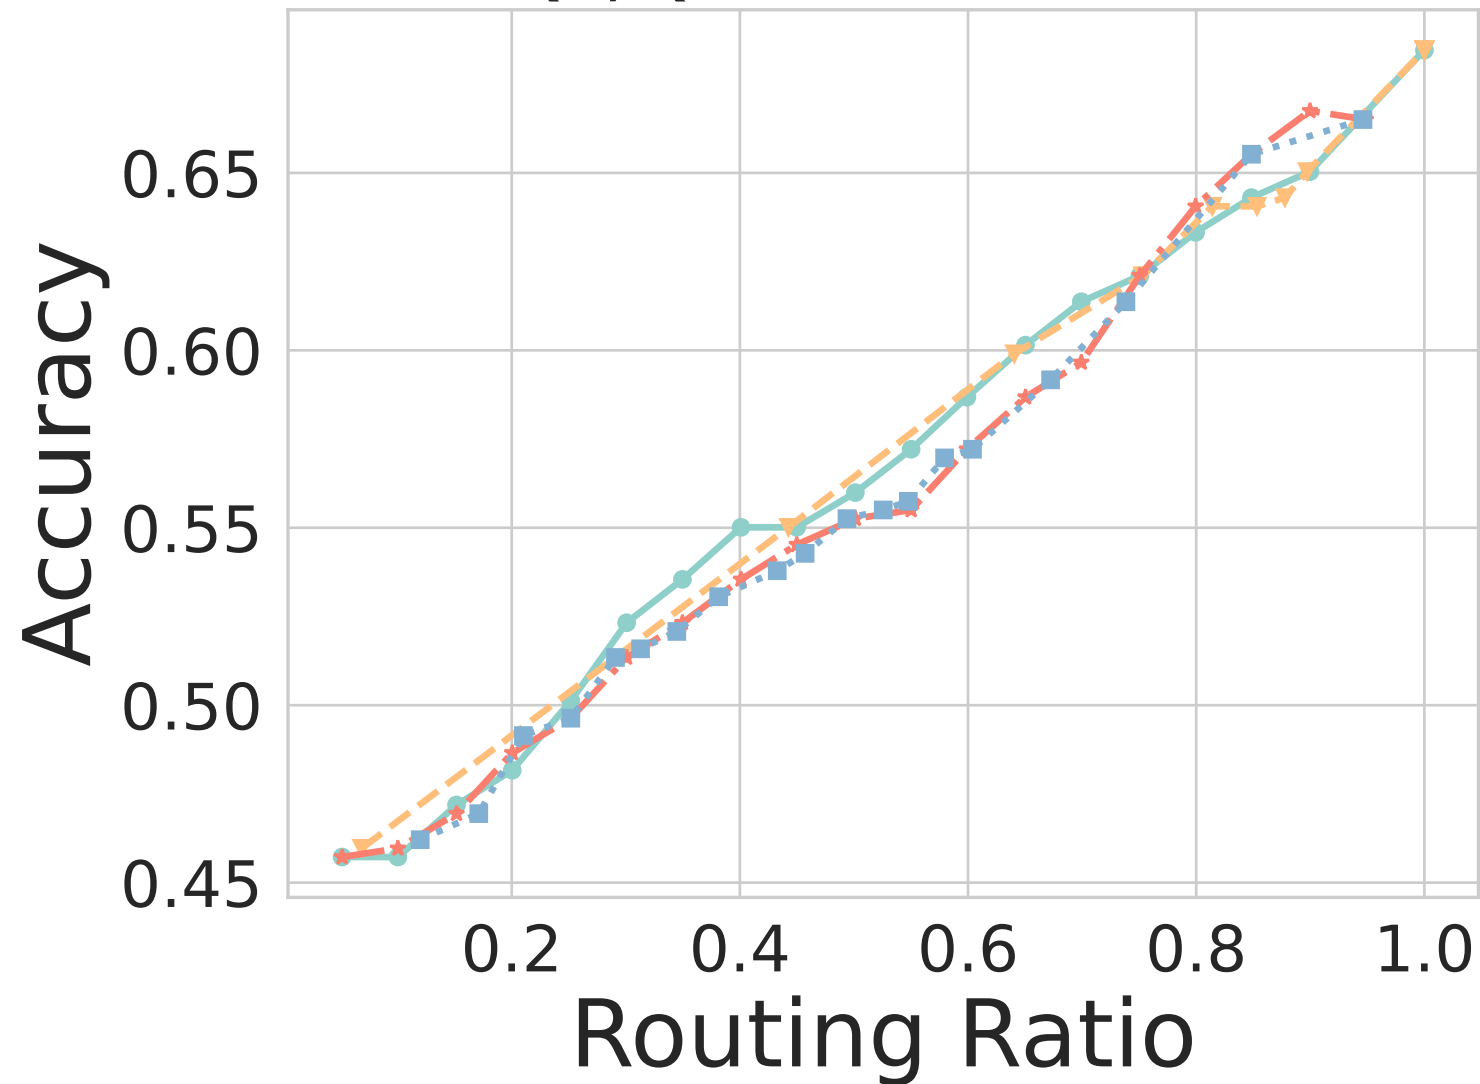

Supplement: supplementary_material [file cali_down_truthful_qa_Qwen3-1.7B_gpt-4.1-mini.pdf › Routing_SLM_LLMs/Proxy_routing_prediction/to_gpt-4.1-mini/truthful_qa_as_downstream/cali_down_truthful_qa_Qwen3-1.7B_gpt-4.1-mini.pdf]

**TruthfulQA, Qwen3-4B to GPT-4.1 mini**

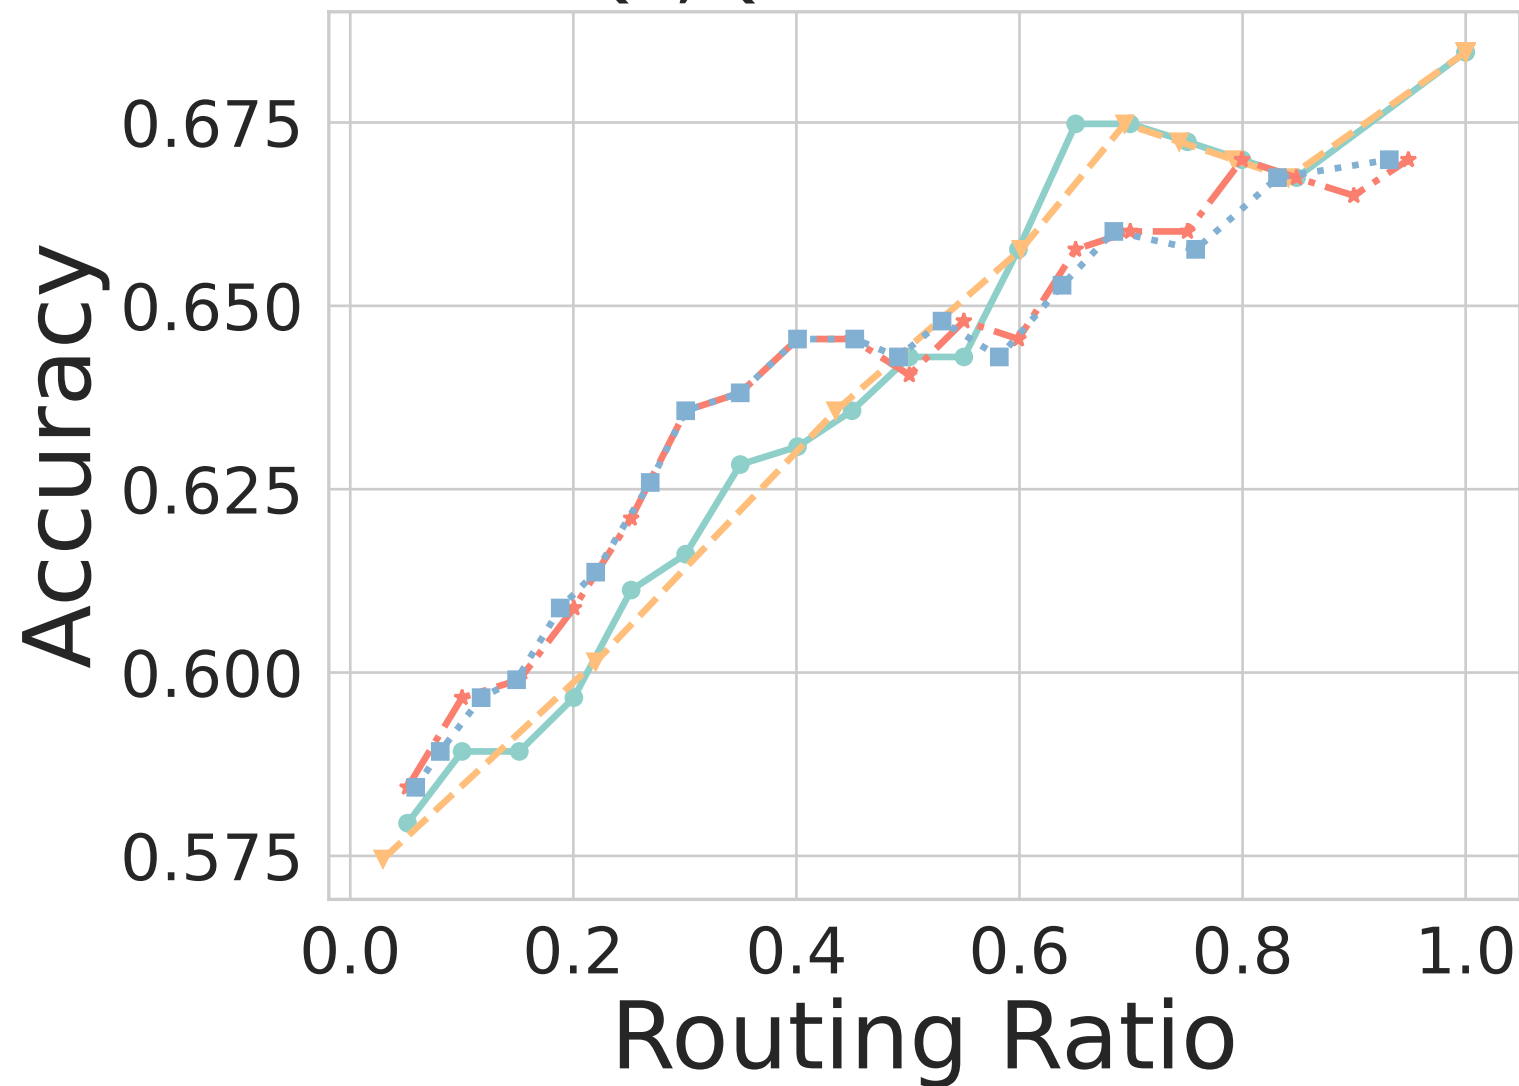

Supplement: supplementary_material [file cali_down_truthful_qa_Qwen3-4B_gpt-4.1-mini.pdf › Routing_SLM_LLMs/Proxy_routing_prediction/to_gpt-4.1-mini/truthful_qa_as_downstream/cali_down_truthful_qa_Qwen3-4B_gpt-4.1-mini.pdf]

**TruthfulQA, granite-3.1-8b to GPT-4.1 mini**

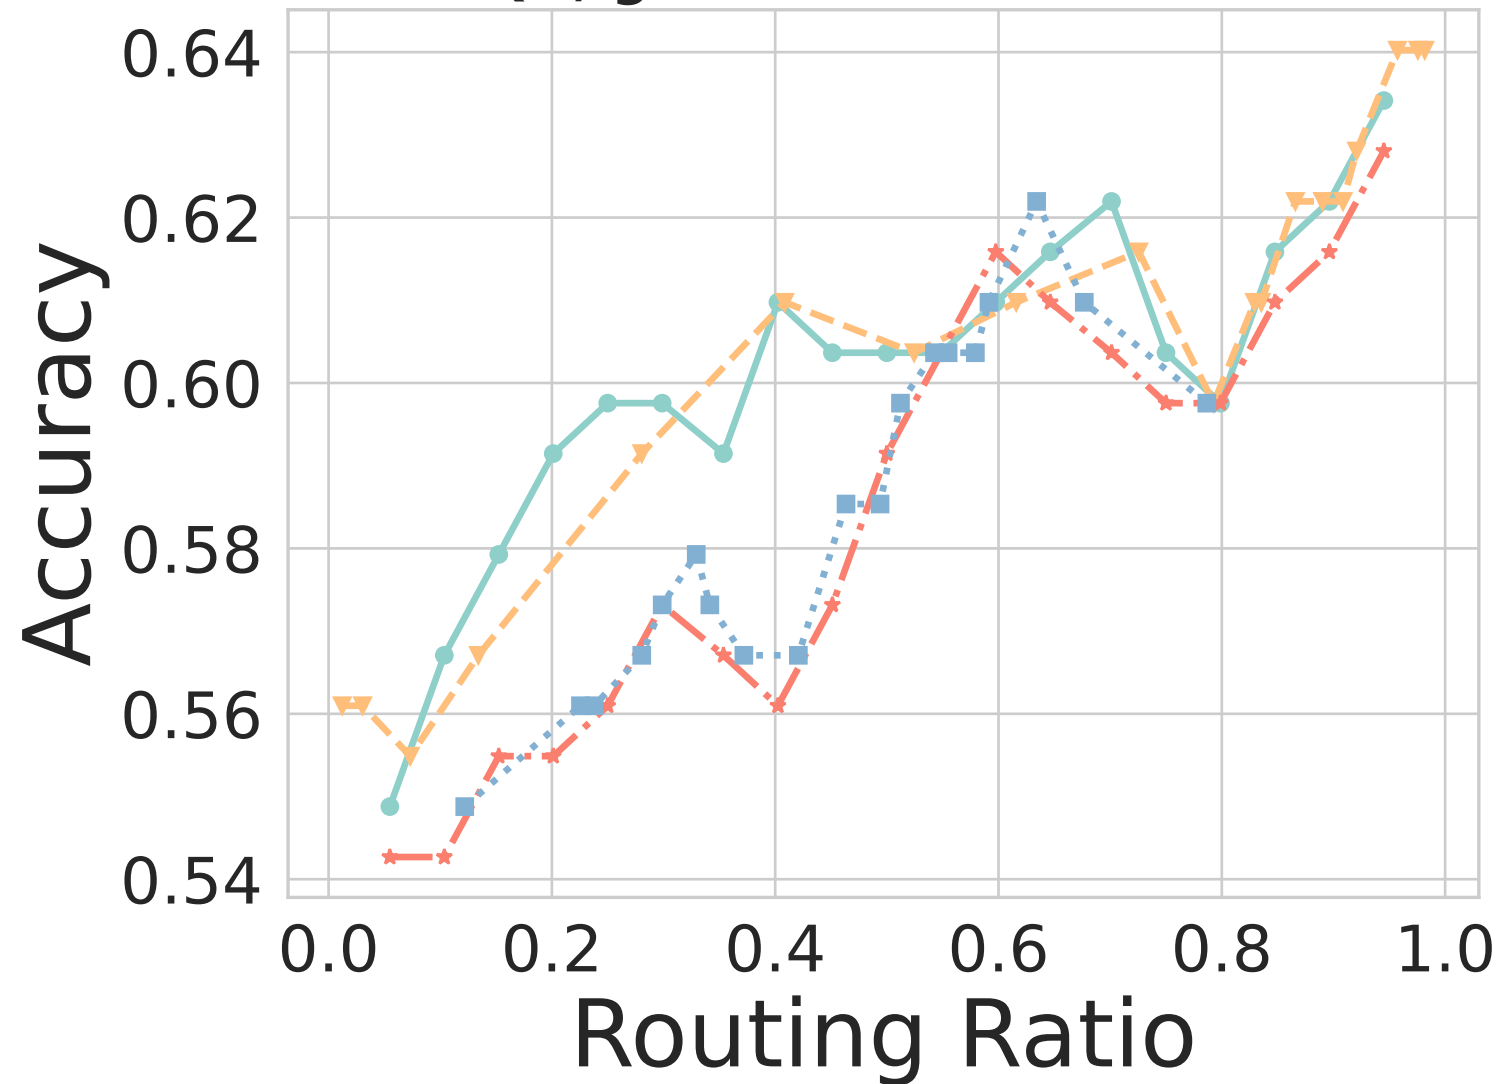

Supplement: supplementary_material [file cali_down_truthful_qa_granite-3.1-8b_gpt-4.1-mini.pdf › Routing_SLM_LLMs/Proxy_routing_prediction/to_gpt-4.1-mini/truthful_qa_as_downstream/cali_down_truthful_qa_granite-3.1-8b_gpt-4.1-mini.pdf]

**TruthfulQA, llama-3.1-8b to GPT-4.1 mini**

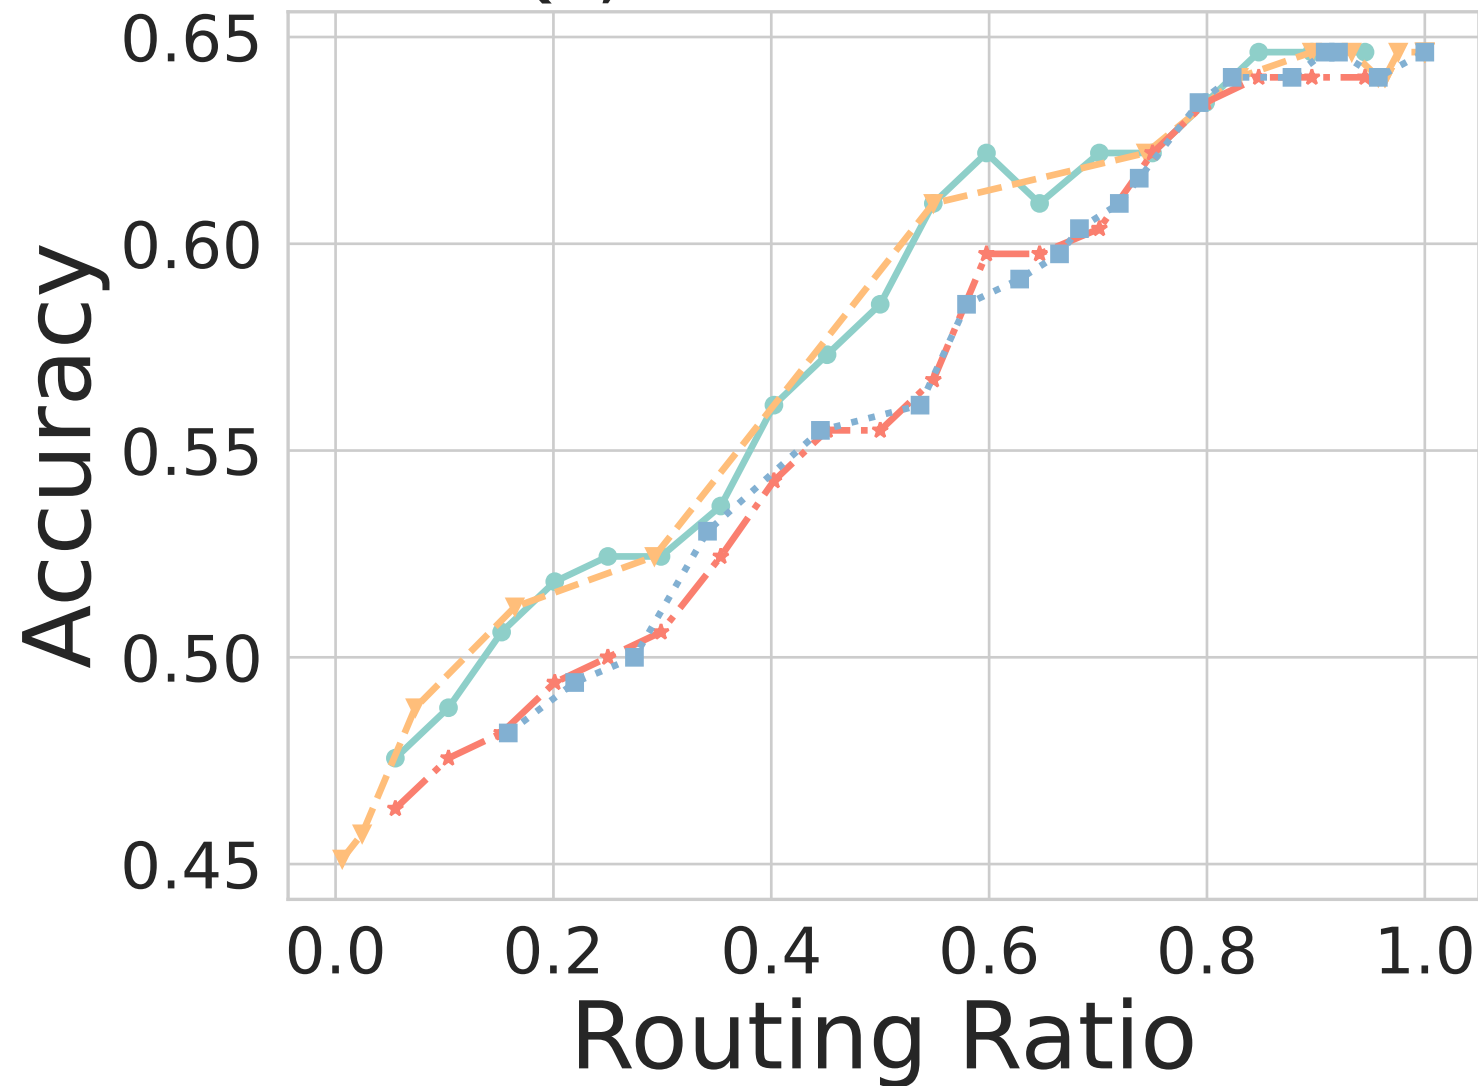

Supplement: supplementary_material [file cali_down_truthful_qa_llama-3.1-8b_gpt-4.1-mini.pdf › Routing_SLM_LLMs/Proxy_routing_prediction/to_gpt-4.1-mini/truthful_qa_as_downstream/cali_down_truthful_qa_llama-3.1-8b_gpt-4.1-mini.pdf]

**TruthfulQA, llama-3.2-1b to GPT-4.1 mini**

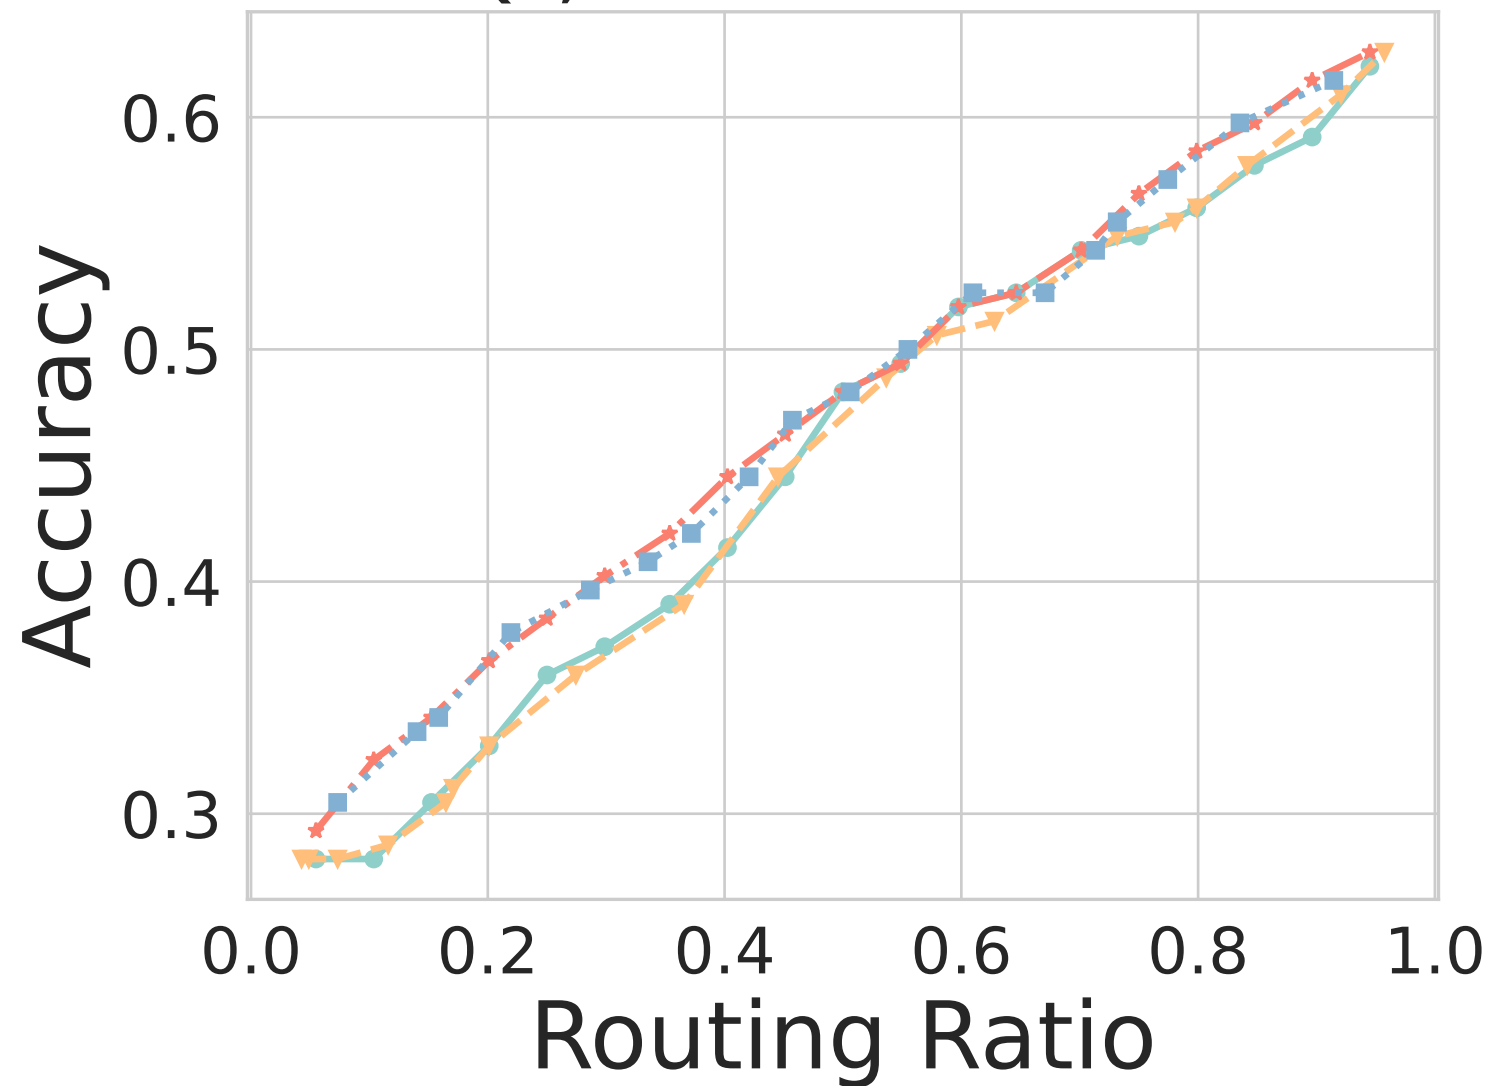

Supplement: supplementary_material [file cali_down_truthful_qa_llama-3.2-1b_gpt-4.1-mini.pdf › Routing_SLM_LLMs/Proxy_routing_prediction/to_gpt-4.1-mini/truthful_qa_as_downstream/cali_down_truthful_qa_llama-3.2-1b_gpt-4.1-mini.pdf]

**TruthfulQA, llama-3.2-3b to GPT-4.1 mini**

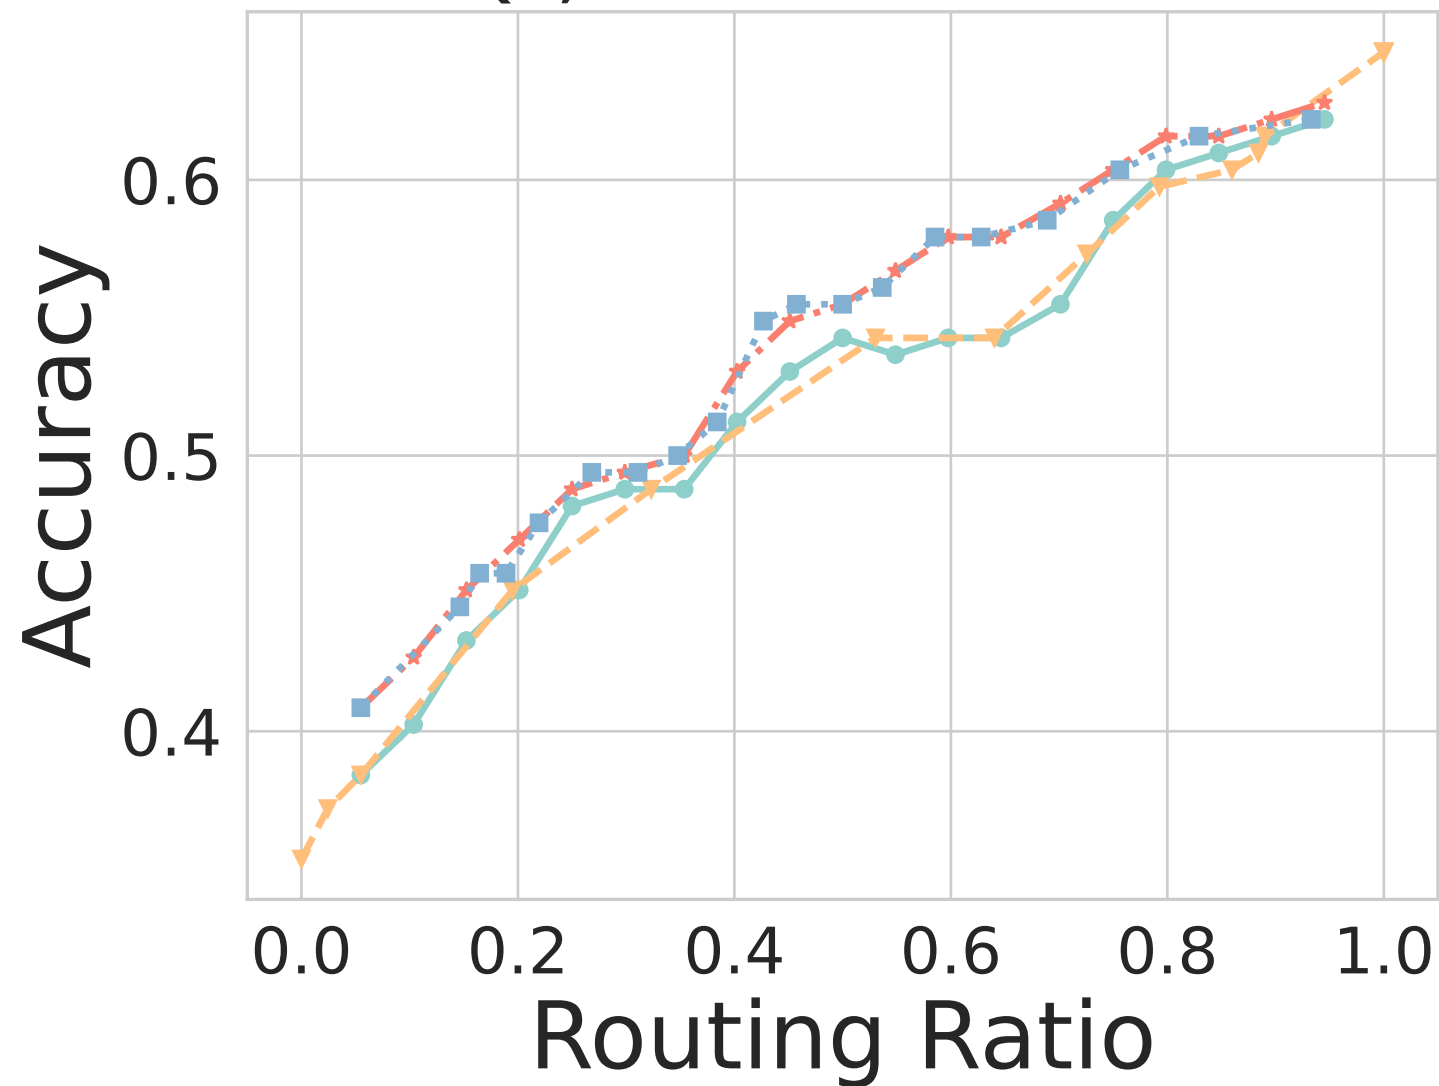

Supplement: supplementary_material [file cali_down_truthful_qa_llama-3.2-3b_gpt-4.1-mini.pdf › Routing_SLM_LLMs/Proxy_routing_prediction/to_gpt-4.1-mini/truthful_qa_as_downstream/cali_down_truthful_qa_llama-3.2-3b_gpt-4.1-mini.pdf]

TruthfulQA, mistral-7b to GPT-4.1 mini

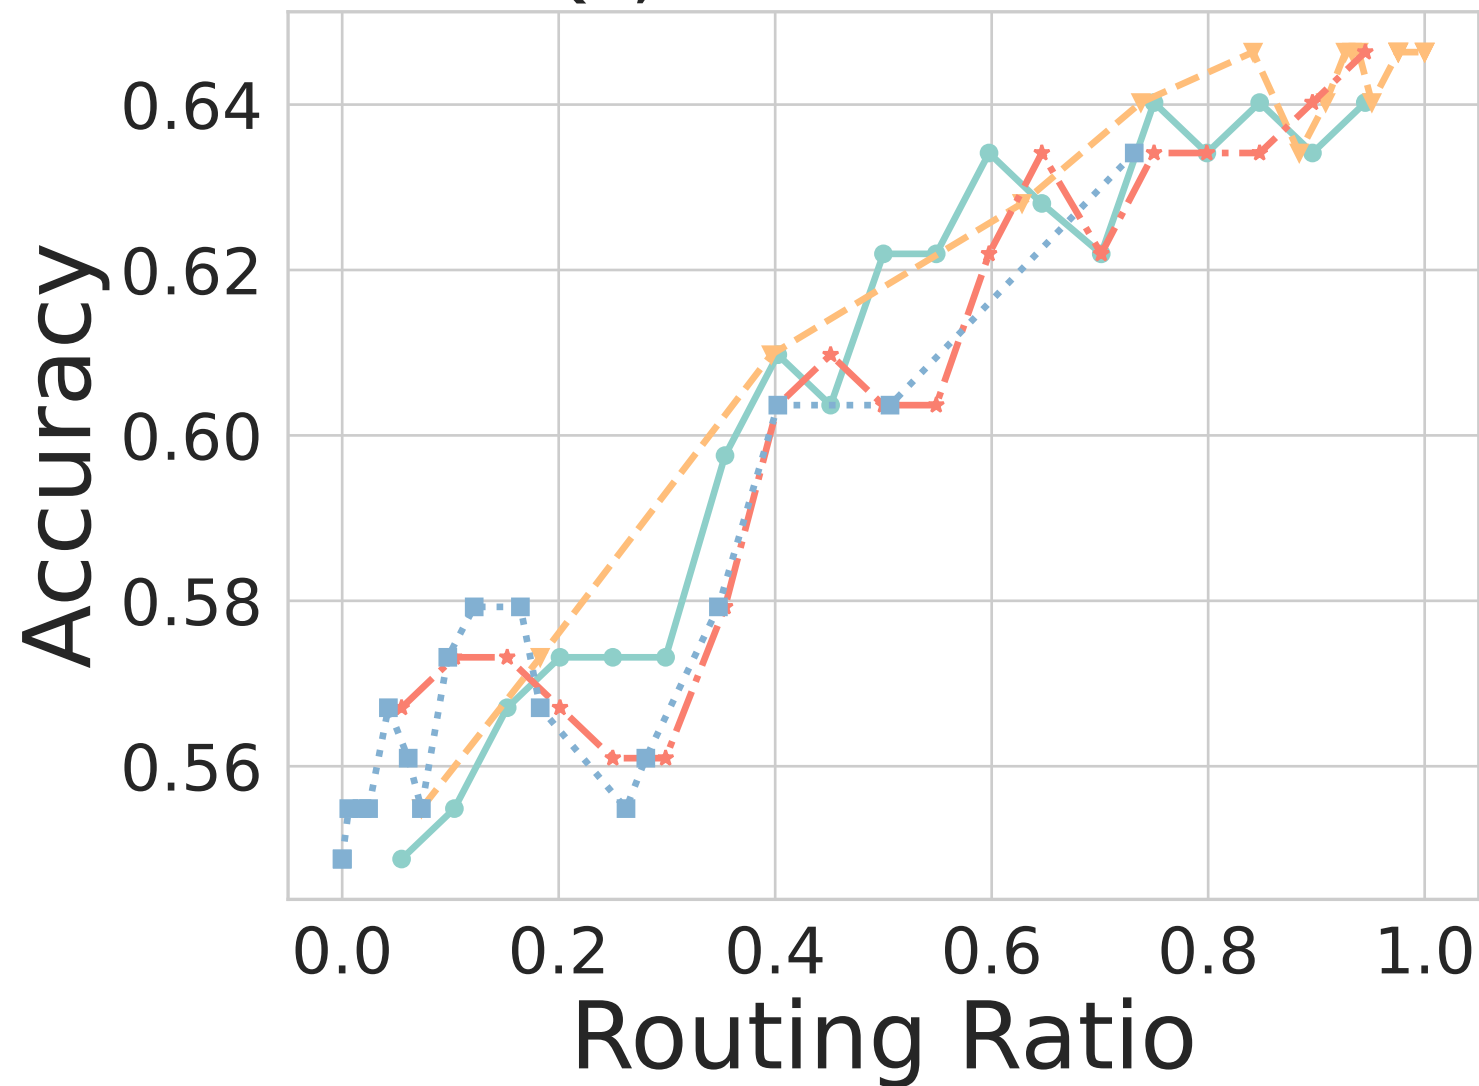

Supplement: supplementary_material [file cali_down_truthful_qa_mistral-7b_gpt-4.1-mini.pdf › Routing_SLM_LLMs/Proxy_routing_prediction/to_gpt-4.1-mini/truthful_qa_as_downstream/cali_down_truthful_qa_mistral-7b_gpt-4.1-mini.pdf]

**TruthfulQA, phi-3.5-mini to GPT-4.1 mini**

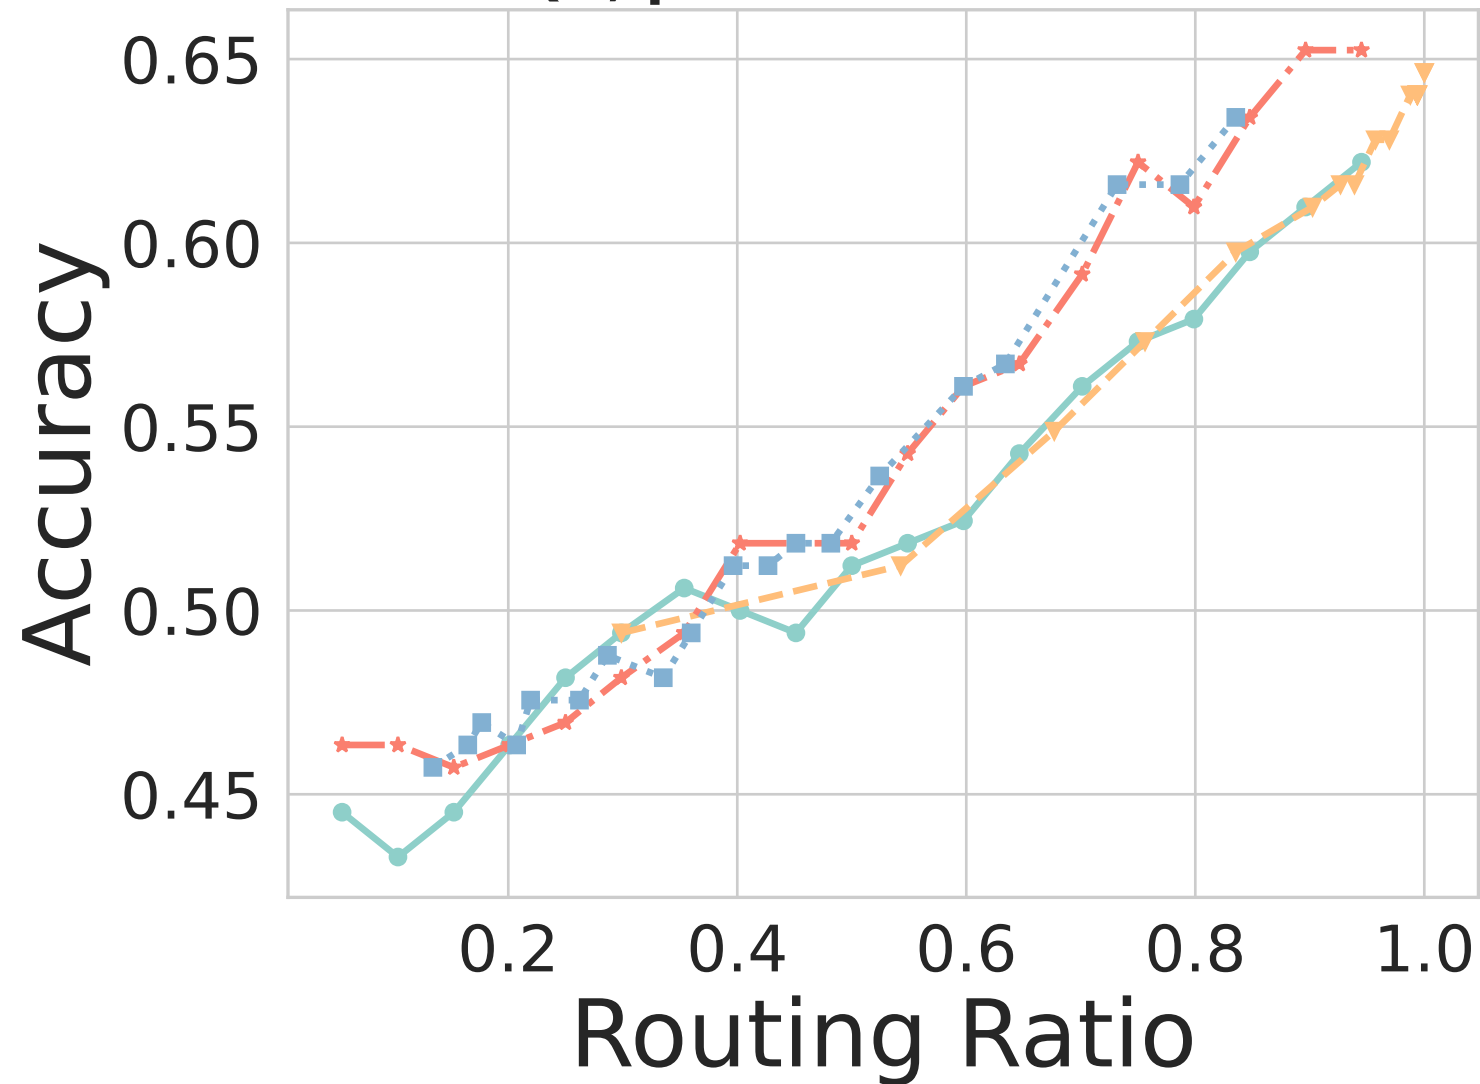

Supplement: supplementary_material [file cali_down_truthful_qa_phi-3.5-mini_gpt-4.1-mini.pdf › Routing_SLM_LLMs/Proxy_routing_prediction/to_gpt-4.1-mini/truthful_qa_as_downstream/cali_down_truthful_qa_phi-3.5-mini_gpt-4.1-mini.pdf]

**TruthfulQA, phi-4-mini-reasoning to GPT-4.1 mini**

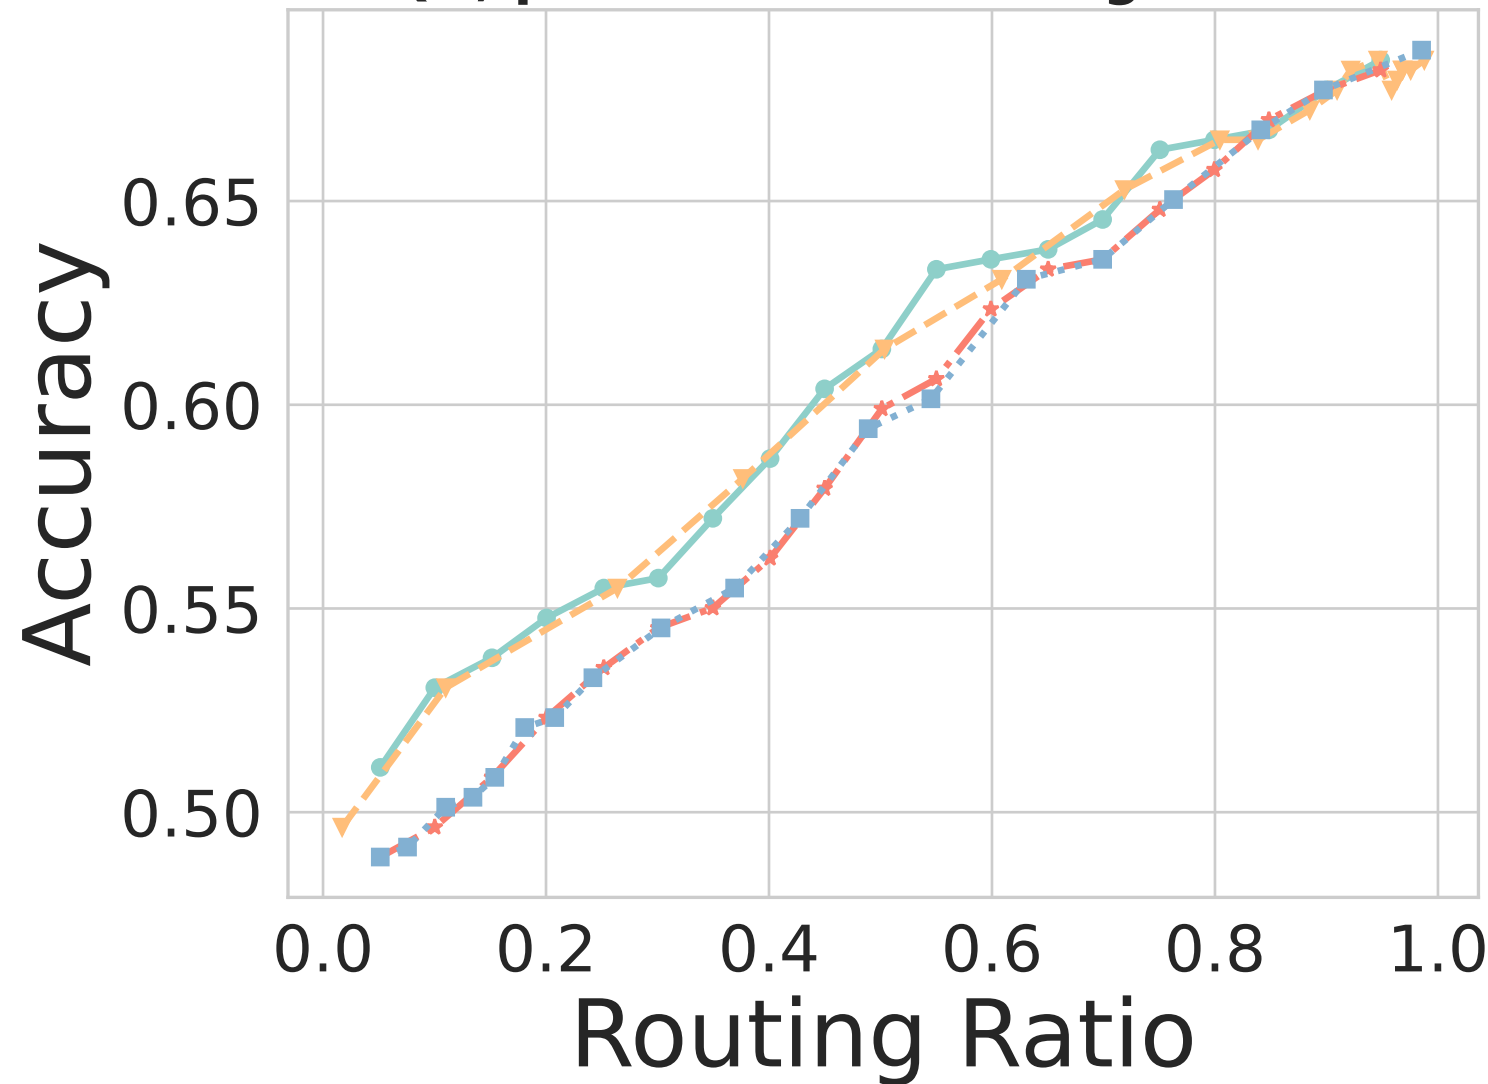

Supplement: supplementary_material [file cali_down_truthful_qa_phi-4-mini-reasoning_gpt-4.1-mini.pdf › Routing_SLM_LLMs/Proxy_routing_prediction/to_gpt-4.1-mini/truthful_qa_as_downstream/cali_down_truthful_qa_phi-4-mini-reasoning_gpt-4.1-mini.pdf]

TruthfulQA, qwen-2.5-7b to GPT-4.1 mini

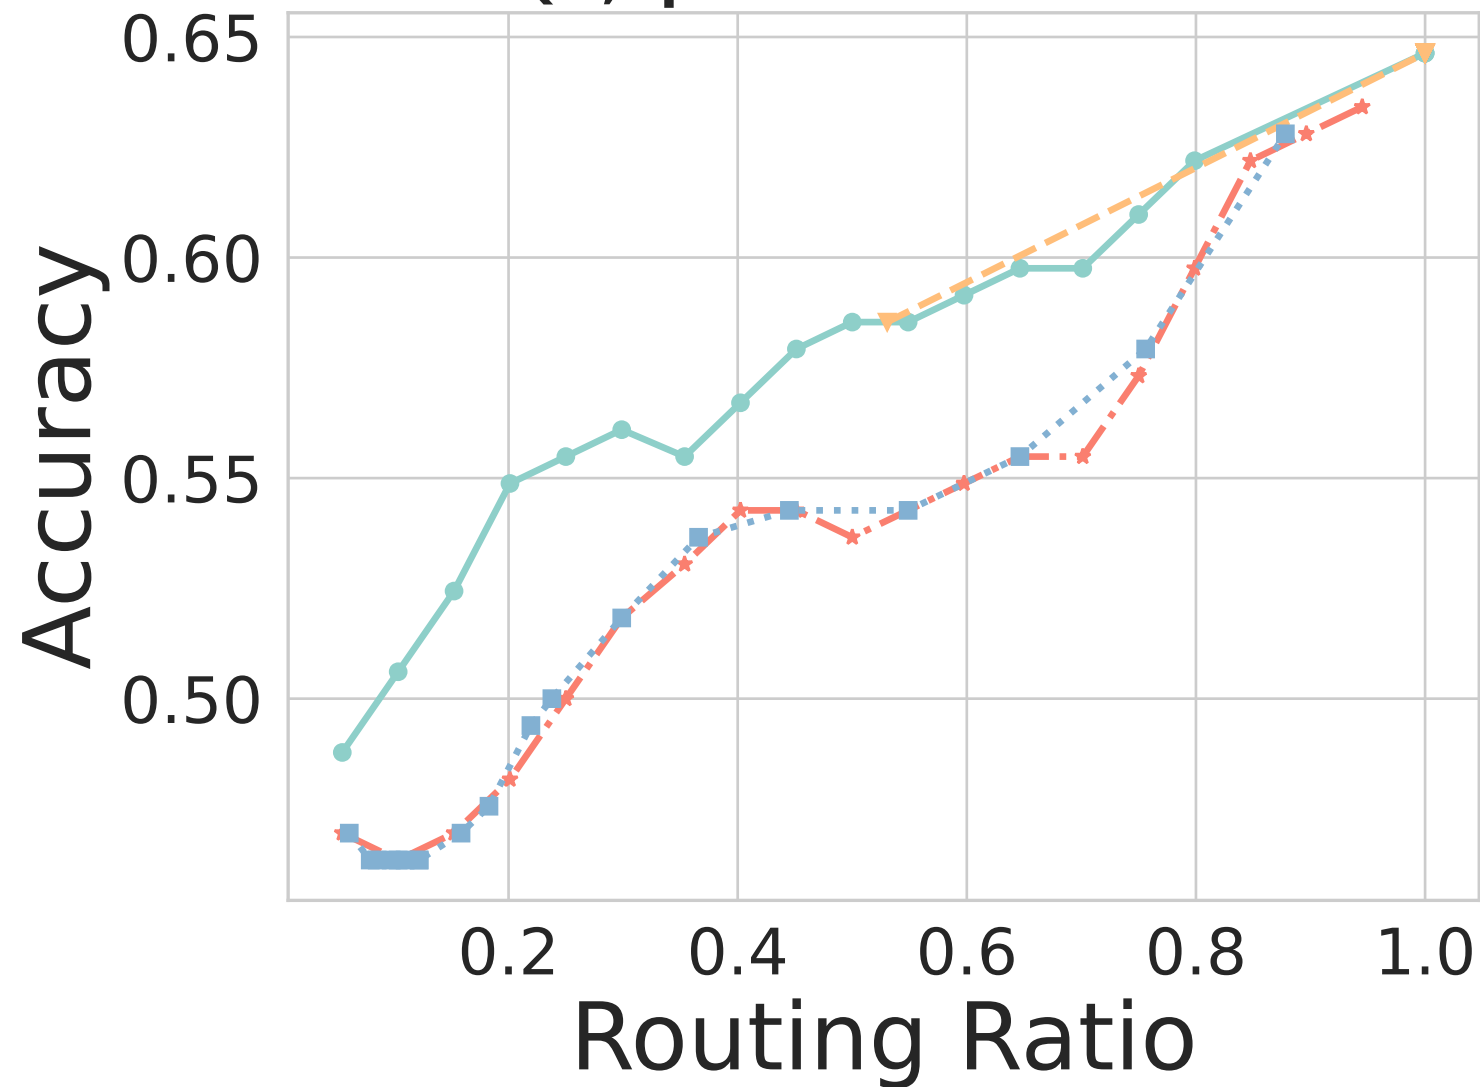

Supplement: supplementary_material [file cali_down_truthful_qa_qwen-2.5-7b_gpt-4.1-mini.pdf › Routing_SLM_LLMs/Proxy_routing_prediction/to_gpt-4.1-mini/truthful_qa_as_downstream/cali_down_truthful_qa_qwen-2.5-7b_gpt-4.1-mini.pdf]

**TruthfulQA, rwkv to GPT-4.1 mini**

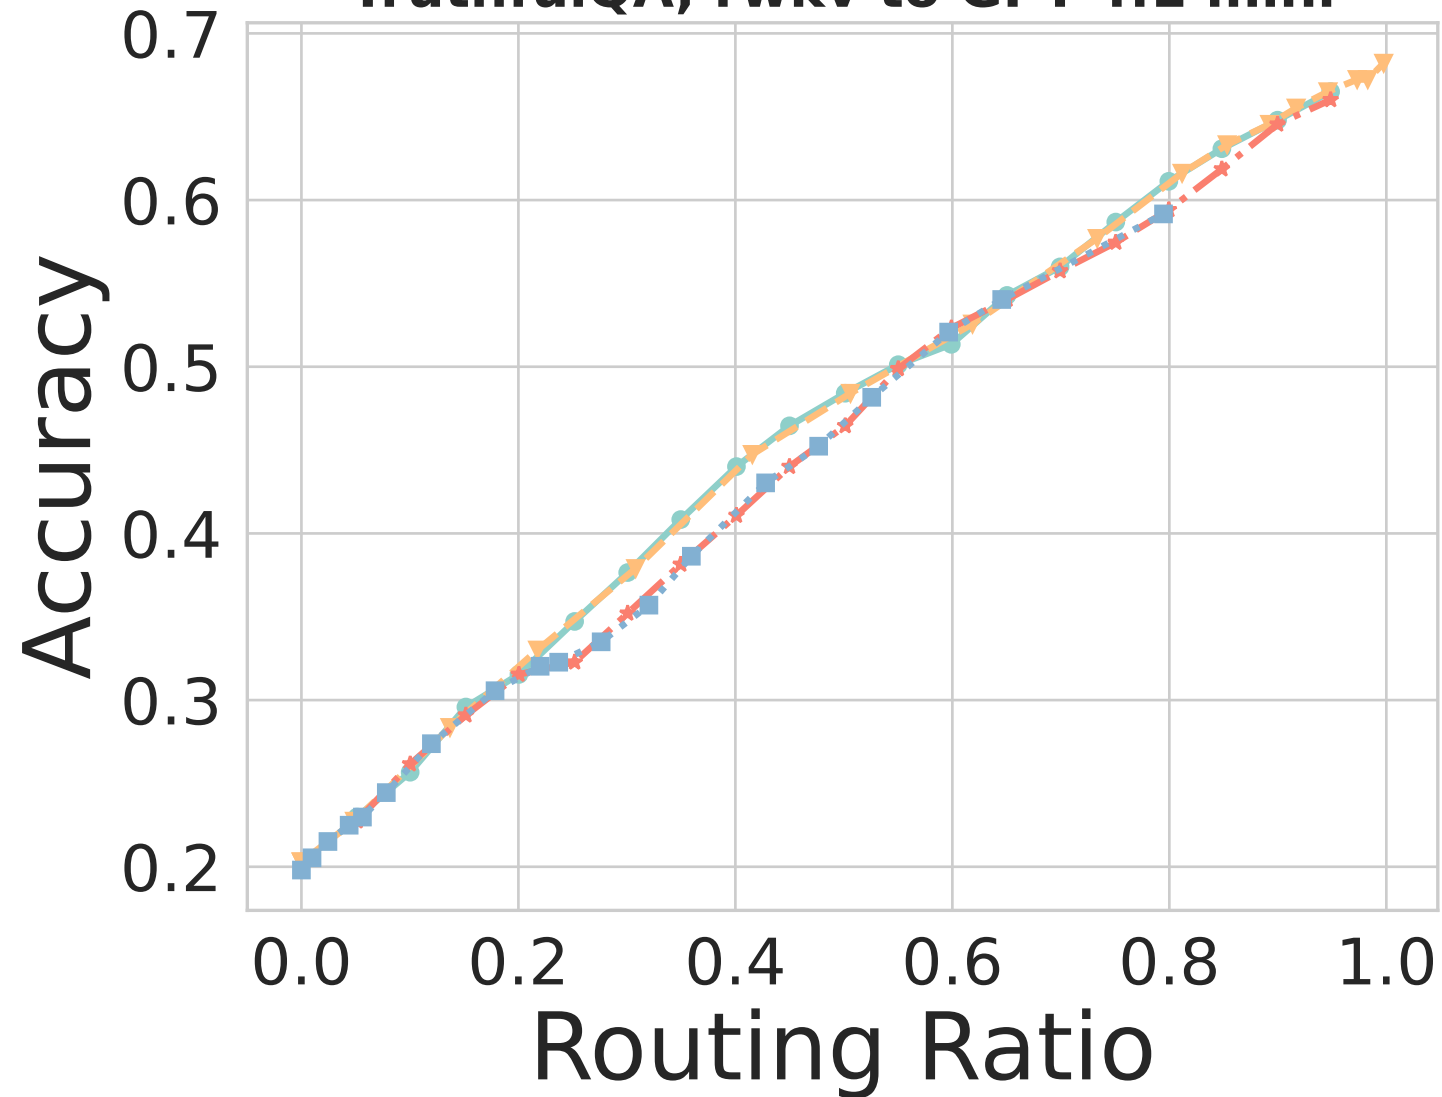

Supplement: supplementary_material [file cali_down_truthful_qa_rwkv_gpt-4.1-mini.pdf › Routing_SLM_LLMs/Proxy_routing_prediction/to_gpt-4.1-mini/truthful_qa_as_downstream/cali_down_truthful_qa_rwkv_gpt-4.1-mini.pdf]

**WinoGrande, Qwen3-0.6B to GPT-4.1 mini**

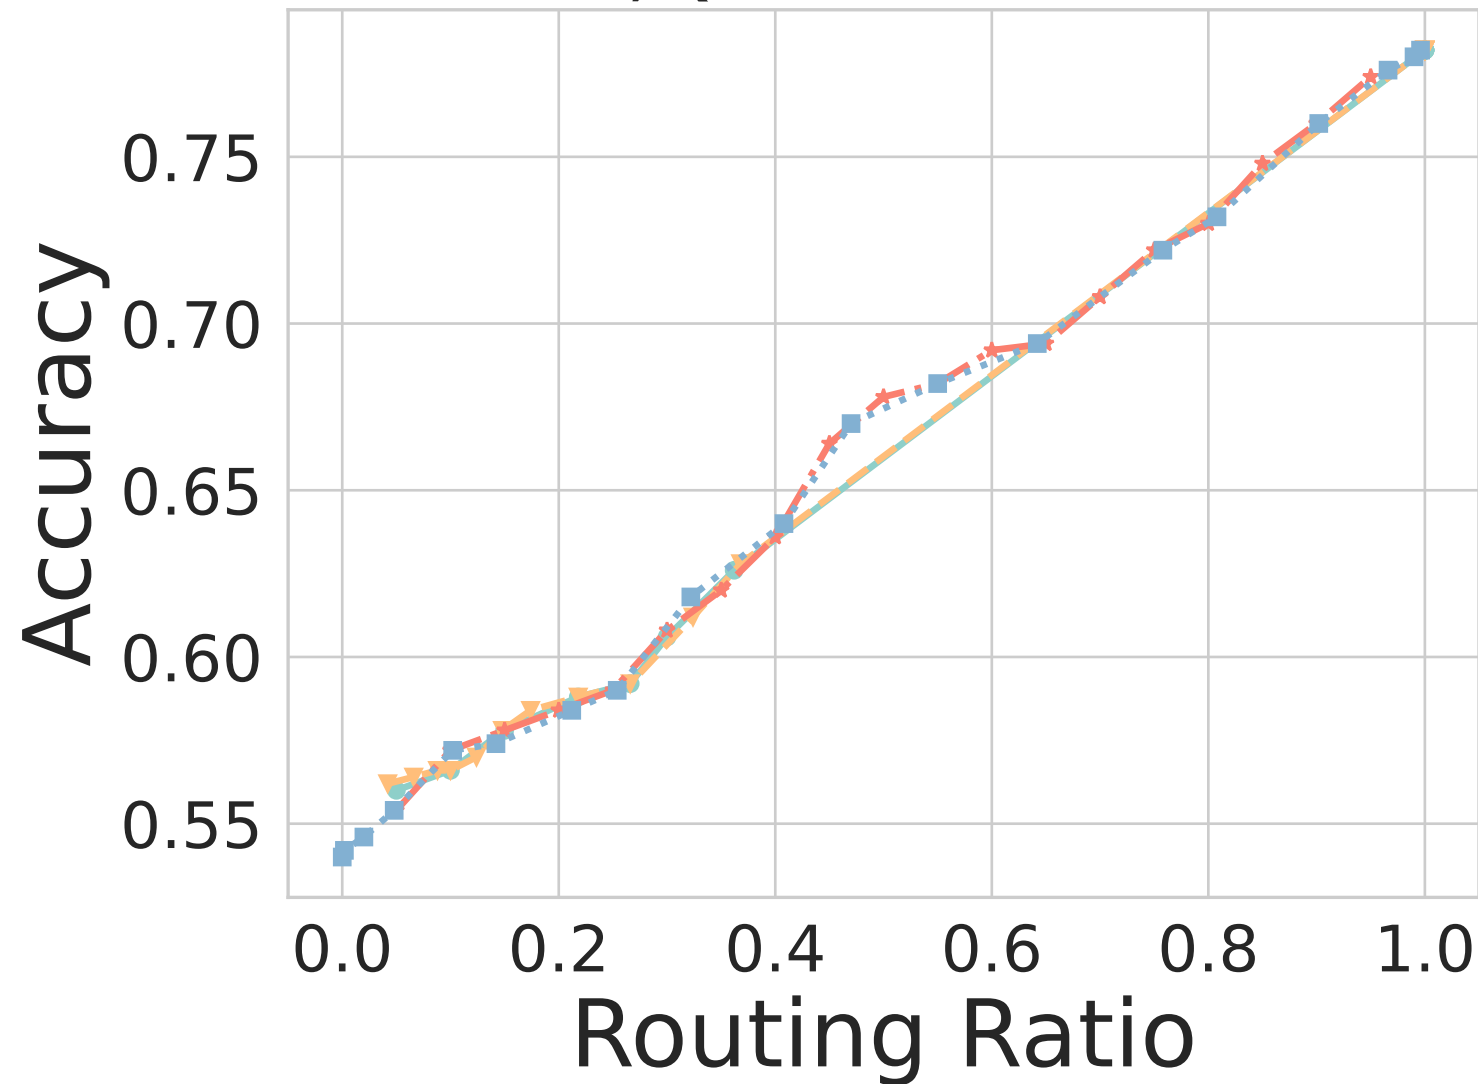

Supplement: supplementary_material [file cali_down_winogrande_Qwen3-0.6B_gpt-4.1-mini.pdf › Routing_SLM_LLMs/Proxy_routing_prediction/to_gpt-4.1-mini/winogrande_as_downstream/cali_down_winogrande_Qwen3-0.6B_gpt-4.1-mini.pdf]

**WinoGrande, Qwen3-1.7B to GPT-4.1 mini**

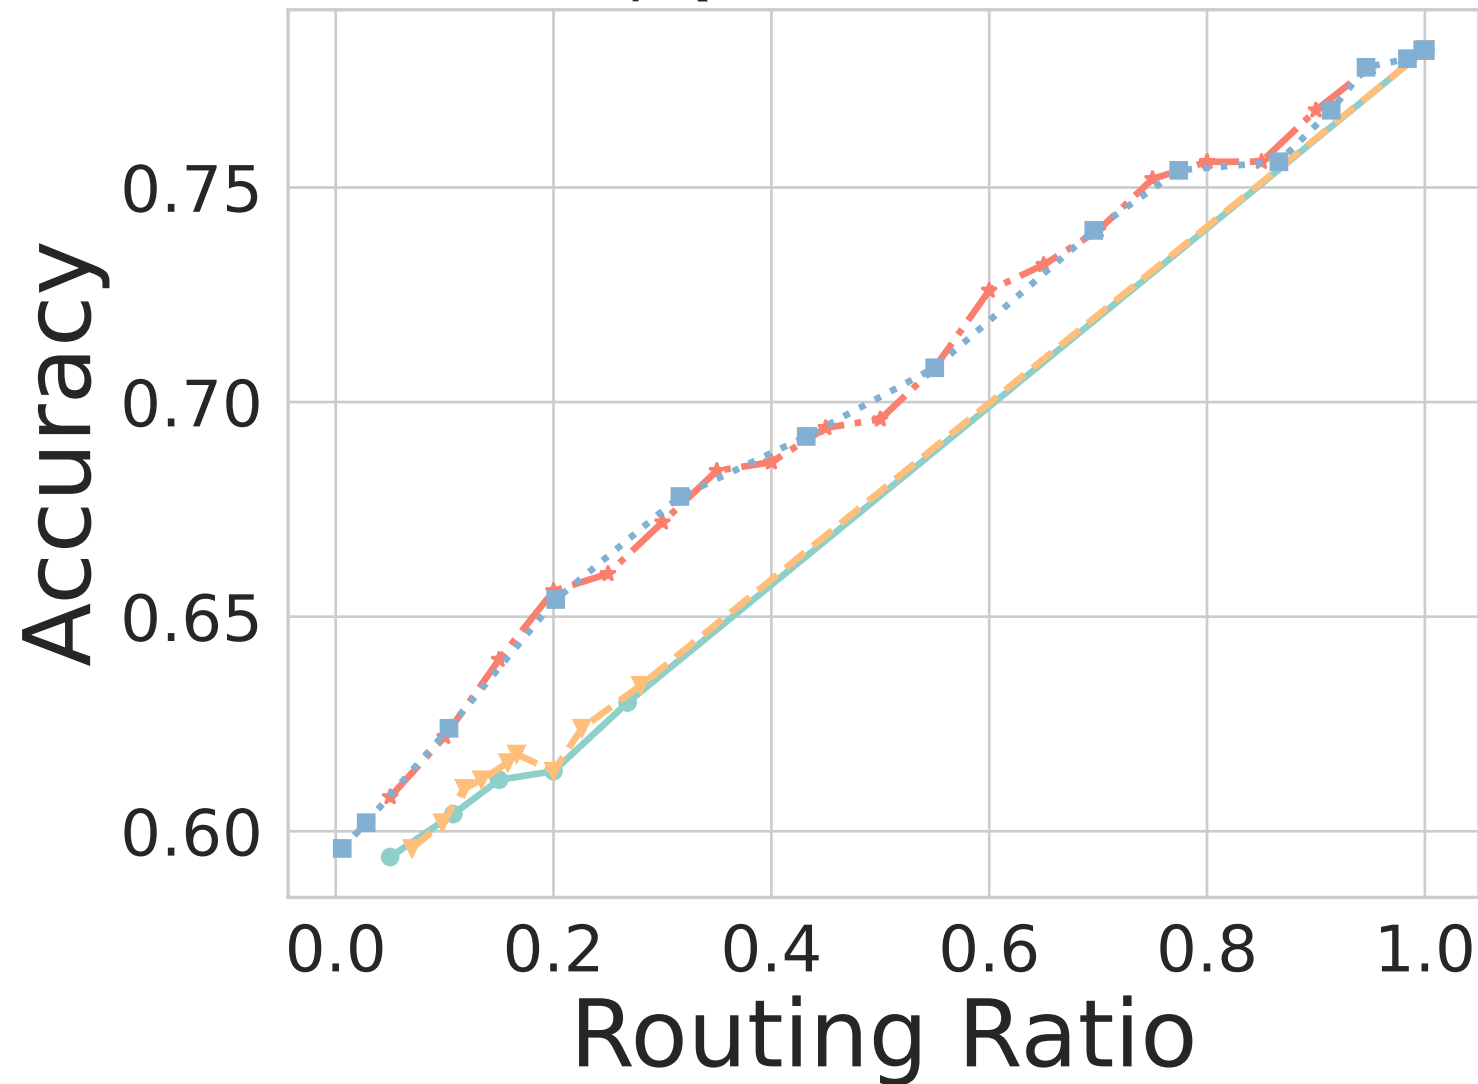

Supplement: supplementary_material [file cali_down_winogrande_Qwen3-1.7B_gpt-4.1-mini.pdf › Routing_SLM_LLMs/Proxy_routing_prediction/to_gpt-4.1-mini/winogrande_as_downstream/cali_down_winogrande_Qwen3-1.7B_gpt-4.1-mini.pdf]

WinoGrande, Qwen3-4B to GPT-4.1 mini

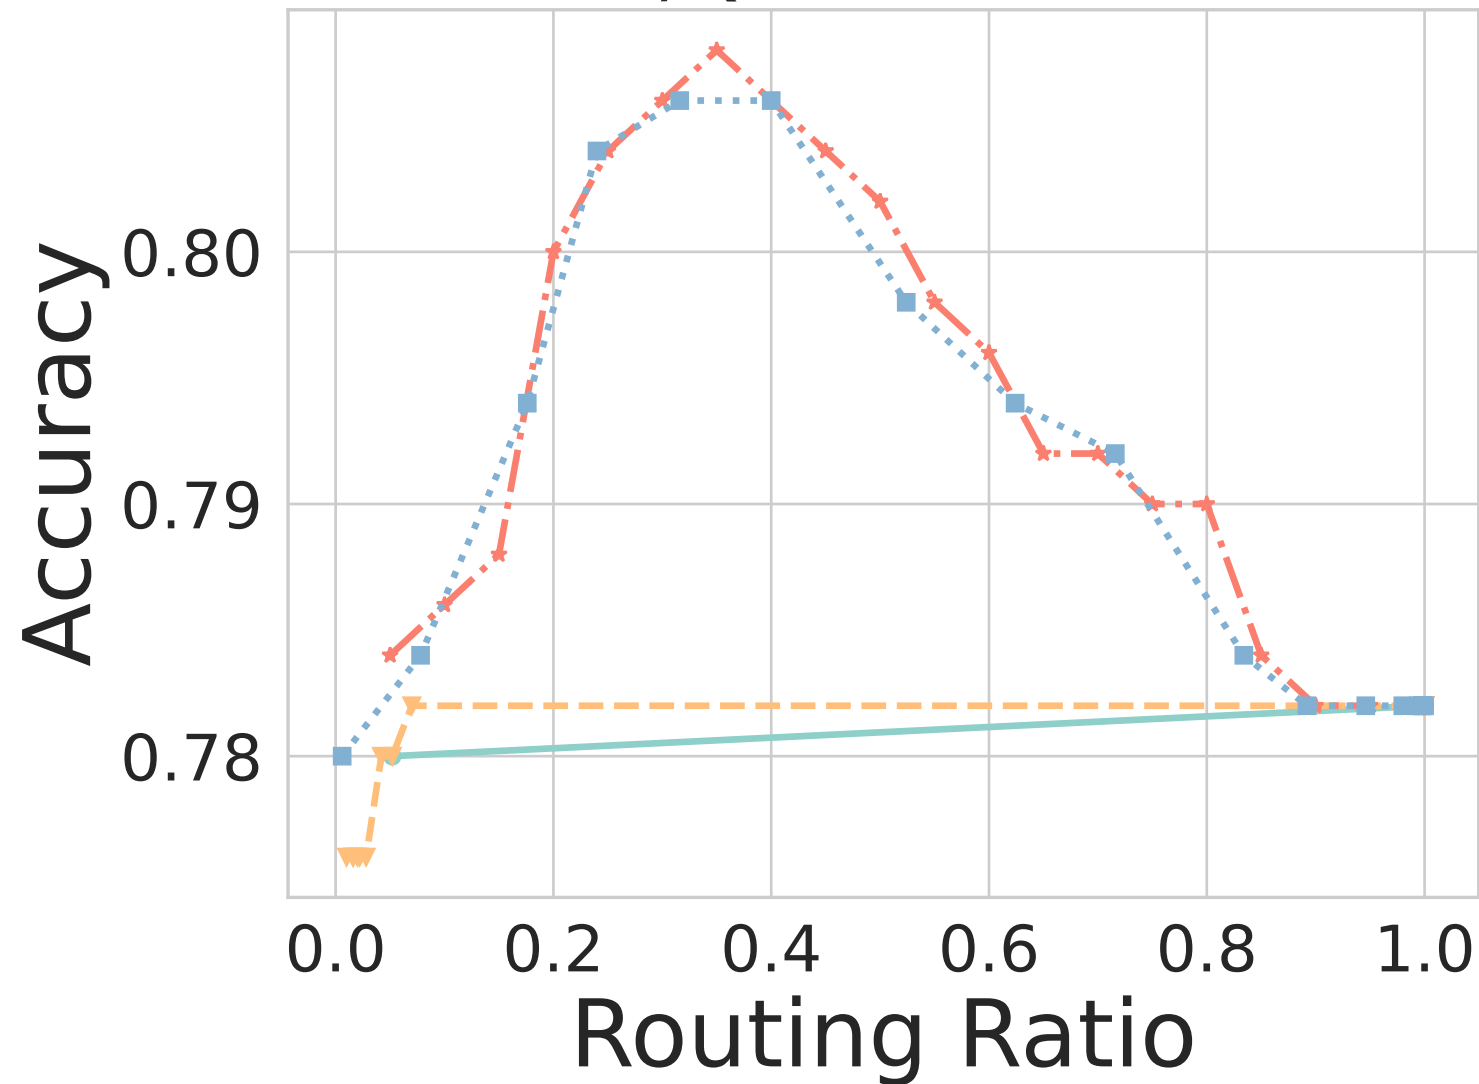

Supplement: supplementary_material [file cali_down_winogrande_Qwen3-4B_gpt-4.1-mini.pdf › Routing_SLM_LLMs/Proxy_routing_prediction/to_gpt-4.1-mini/winogrande_as_downstream/cali_down_winogrande_Qwen3-4B_gpt-4.1-mini.pdf]

WinoGrande, granite-3.1-8b to GPT-4.1 mini

Accuracy

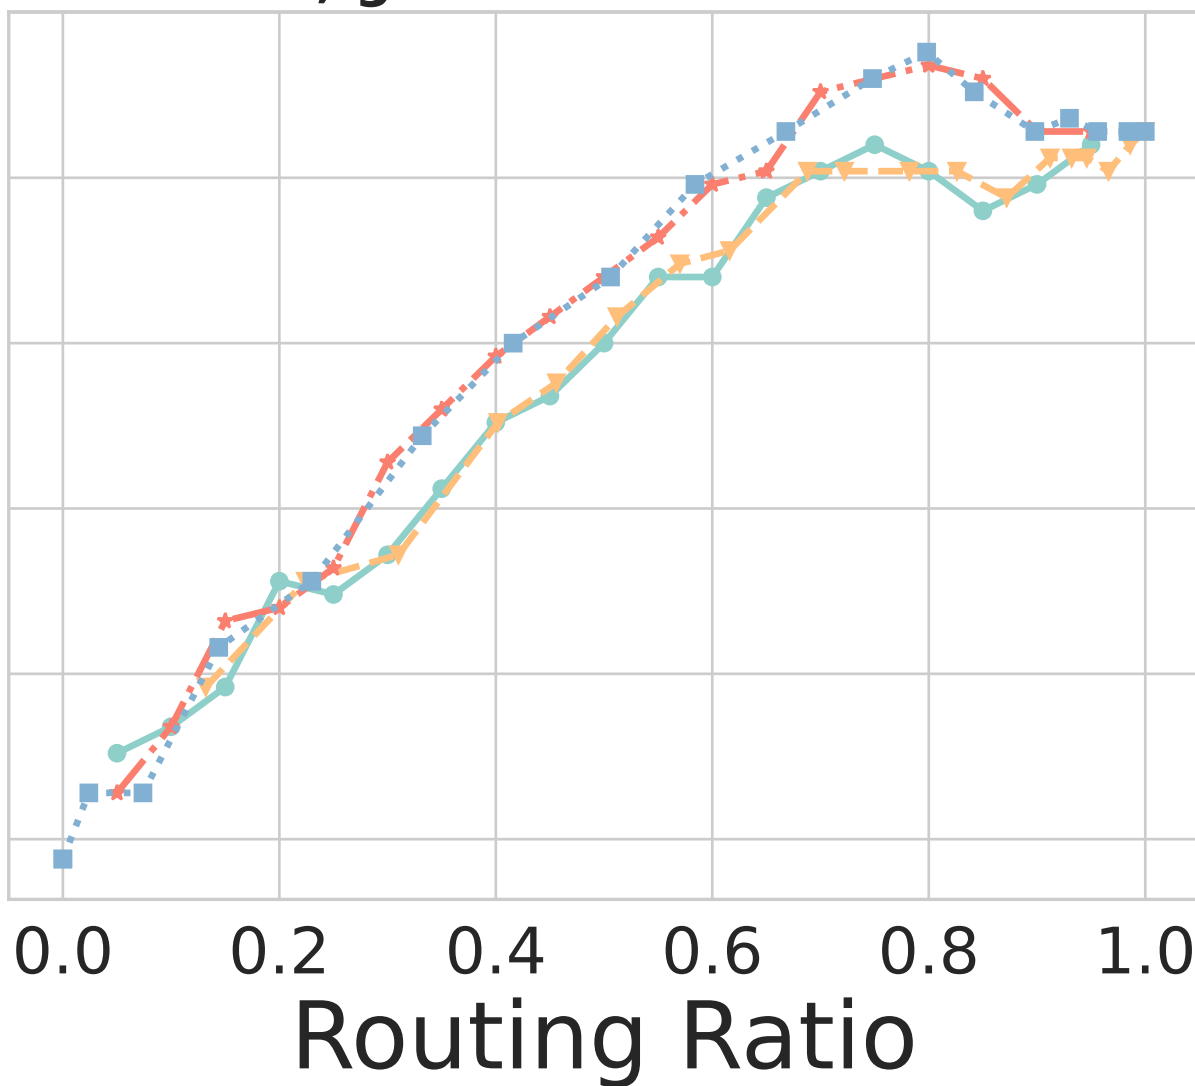

Supplement: supplementary_material [file cali_down_winogrande_granite-3.1-8b_gpt-4.1-mini.pdf › Routing_SLM_LLMs/Proxy_routing_prediction/to_gpt-4.1-mini/winogrande_as_downstream/cali_down_winogrande_granite-3.1-8b_gpt-4.1-mini.pdf]

# WinoGrande, llama-3.1-8b to GPT-4.1 mini

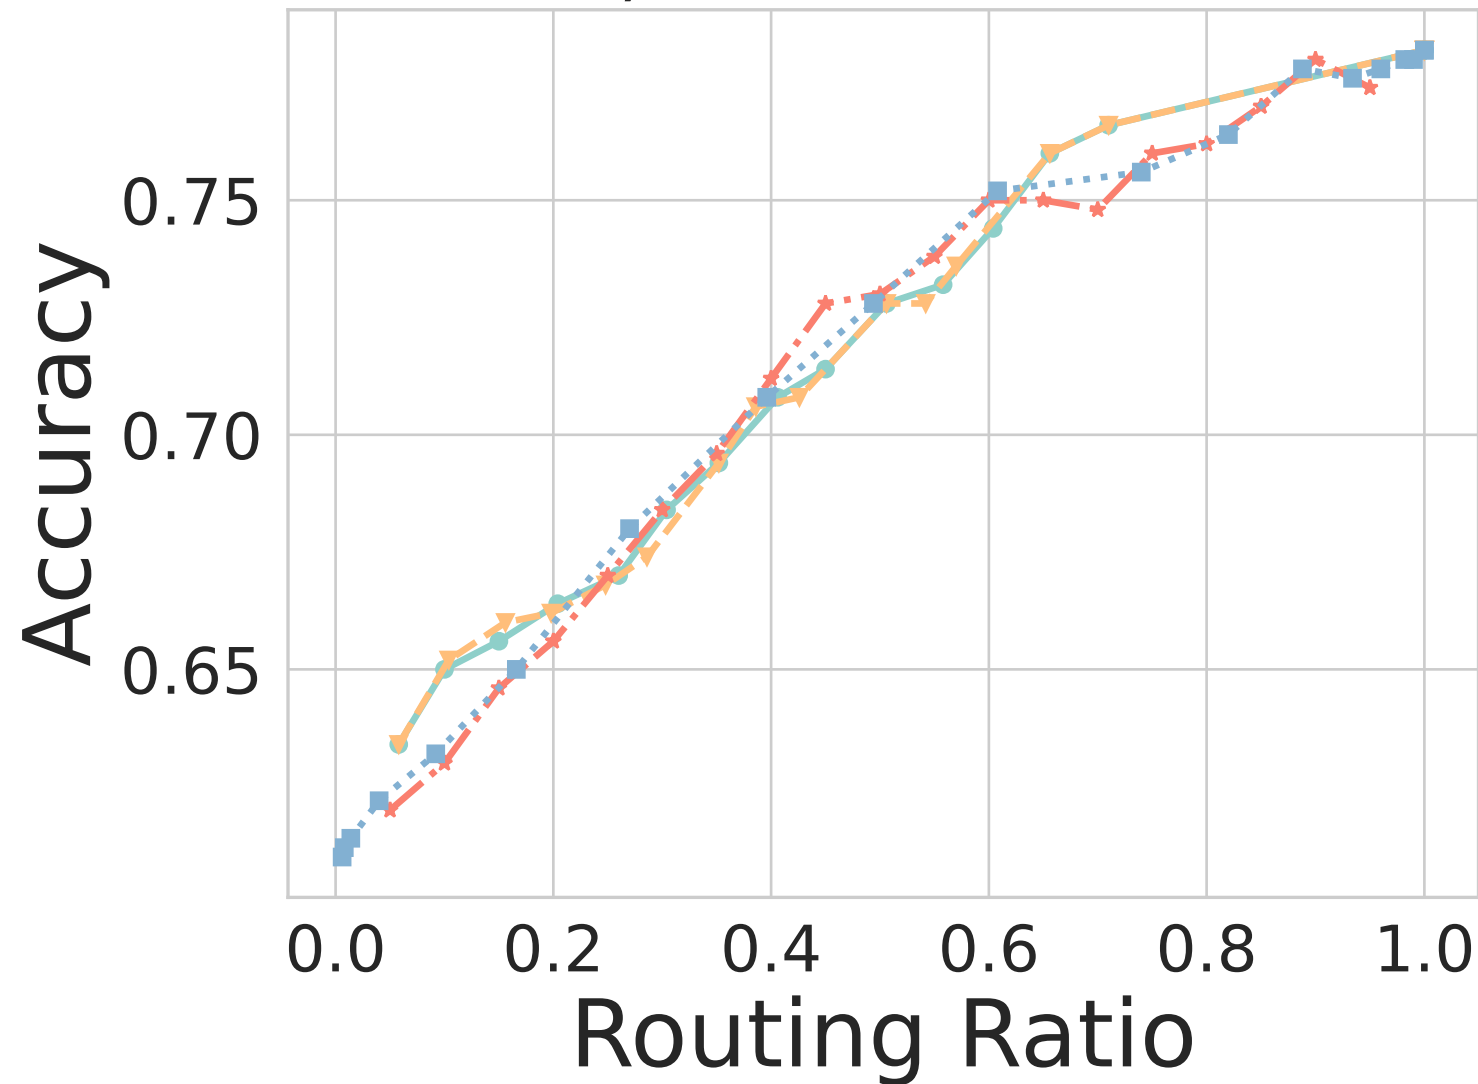

Supplement: supplementary_material [file cali_down_winogrande_llama-3.1-8b_gpt-4.1-mini.pdf › Routing_SLM_LLMs/Proxy_routing_prediction/to_gpt-4.1-mini/winogrande_as_downstream/cali_down_winogrande_llama-3.1-8b_gpt-4.1-mini.pdf]

# WinoGrande, llama-3.2-1b to GPT-4.1 mini

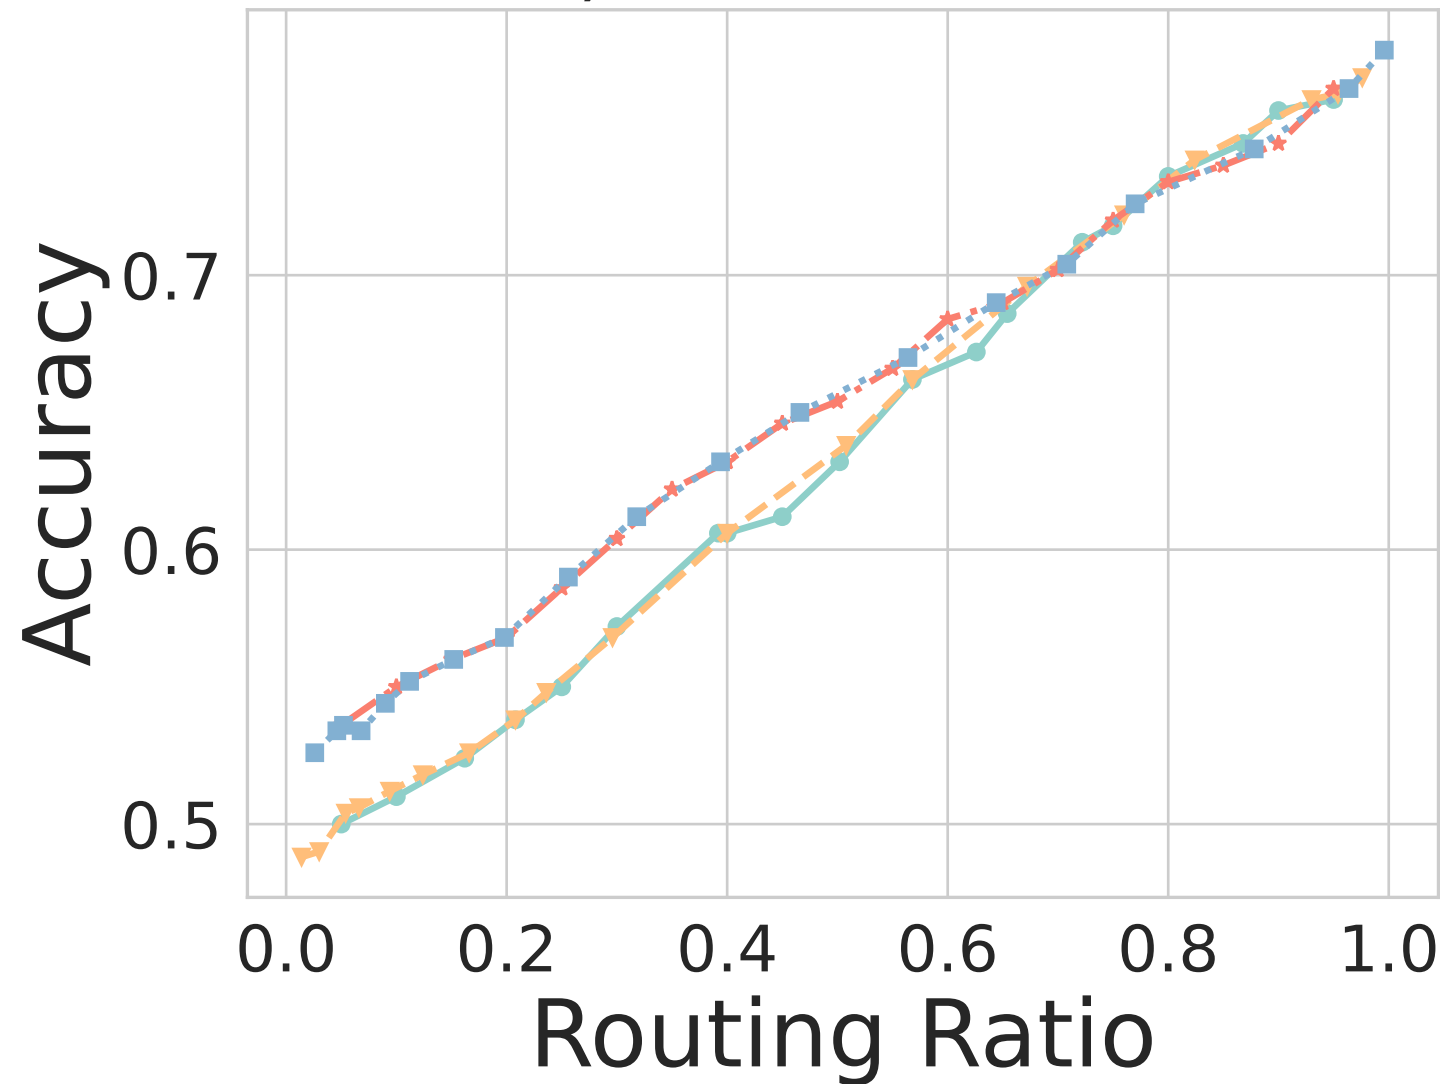

Supplement: supplementary_material [file cali_down_winogrande_llama-3.2-1b_gpt-4.1-mini.pdf › Routing_SLM_LLMs/Proxy_routing_prediction/to_gpt-4.1-mini/winogrande_as_downstream/cali_down_winogrande_llama-3.2-1b_gpt-4.1-mini.pdf]

# WinoGrande, llama-3.2-3b to GPT-4.1 mini

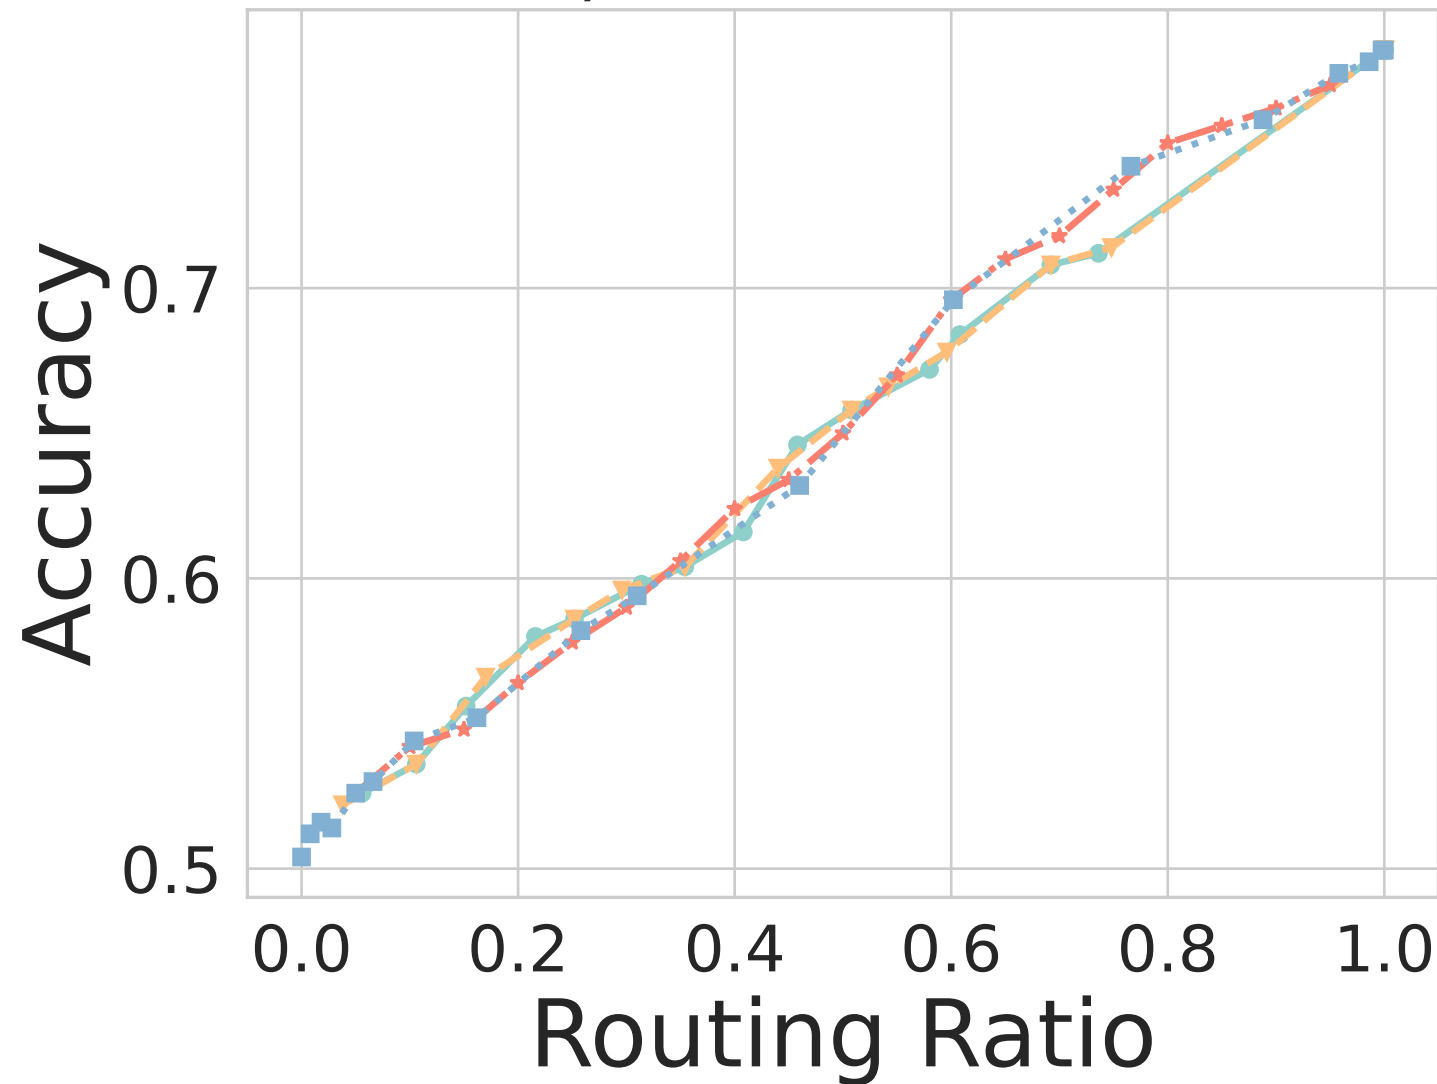

Supplement: supplementary_material [file cali_down_winogrande_llama-3.2-3b_gpt-4.1-mini.pdf › Routing_SLM_LLMs/Proxy_routing_prediction/to_gpt-4.1-mini/winogrande_as_downstream/cali_down_winogrande_llama-3.2-3b_gpt-4.1-mini.pdf]

**WinoGrande, mistral-7b to GPT-4.1 mini**

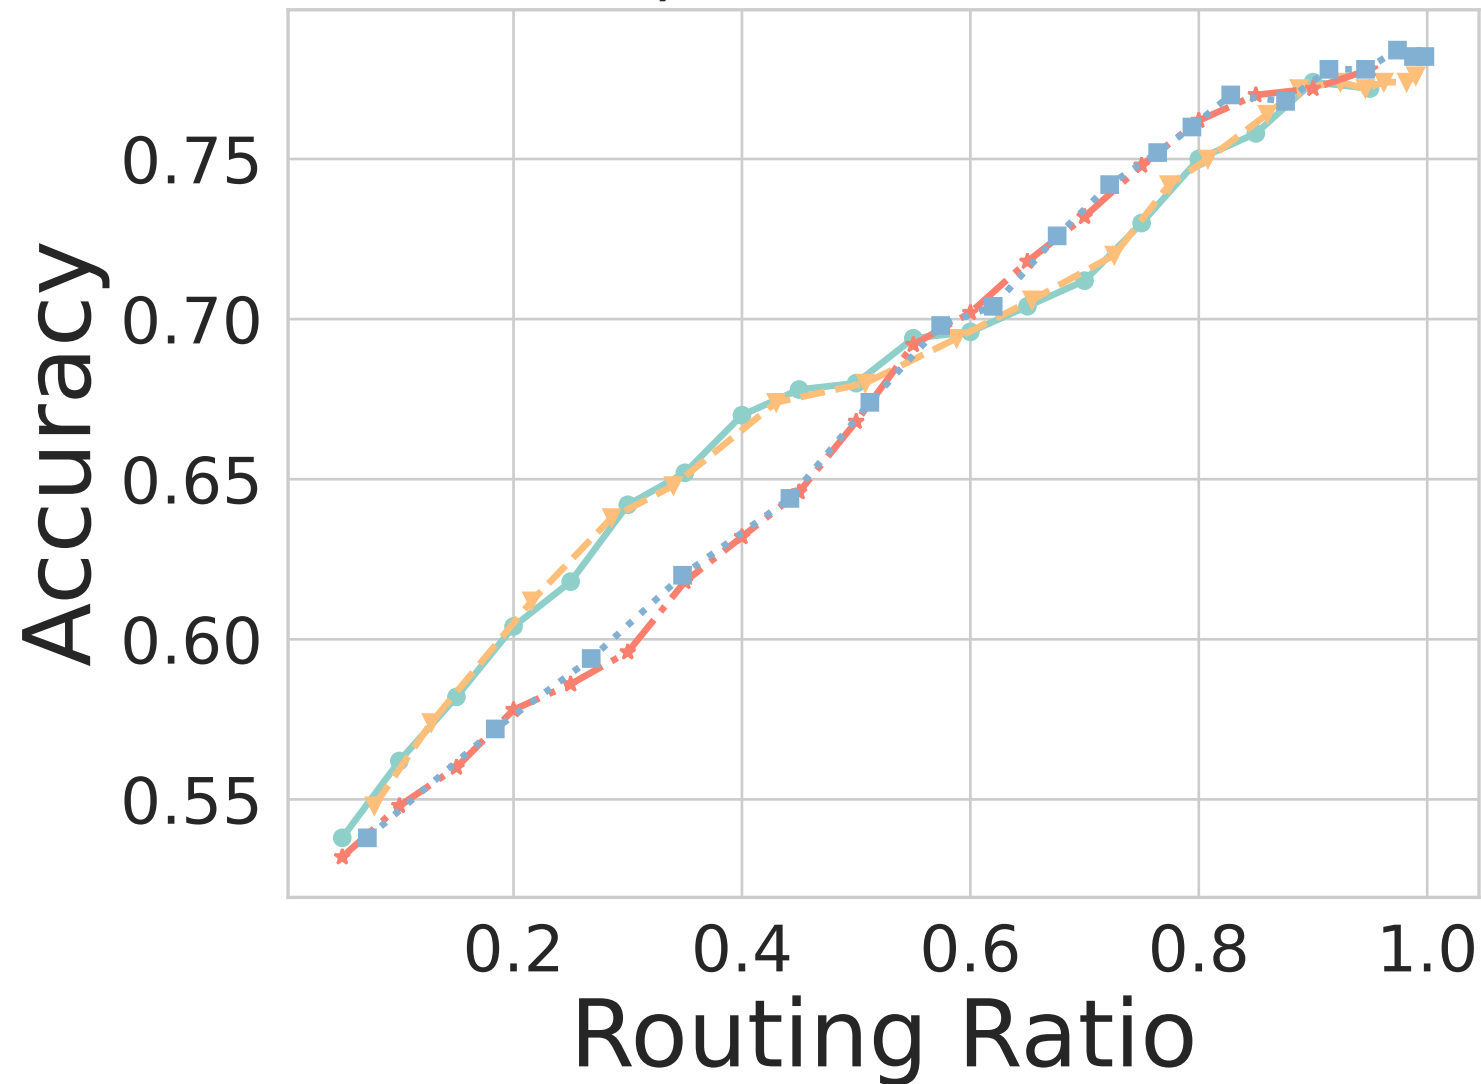

Supplement: supplementary_material [file cali_down_winogrande_mistral-7b_gpt-4.1-mini.pdf › Routing_SLM_LLMs/Proxy_routing_prediction/to_gpt-4.1-mini/winogrande_as_downstream/cali_down_winogrande_mistral-7b_gpt-4.1-mini.pdf]

**WinoGrande, phi-3.5-mini to GPT-4.1 mini**

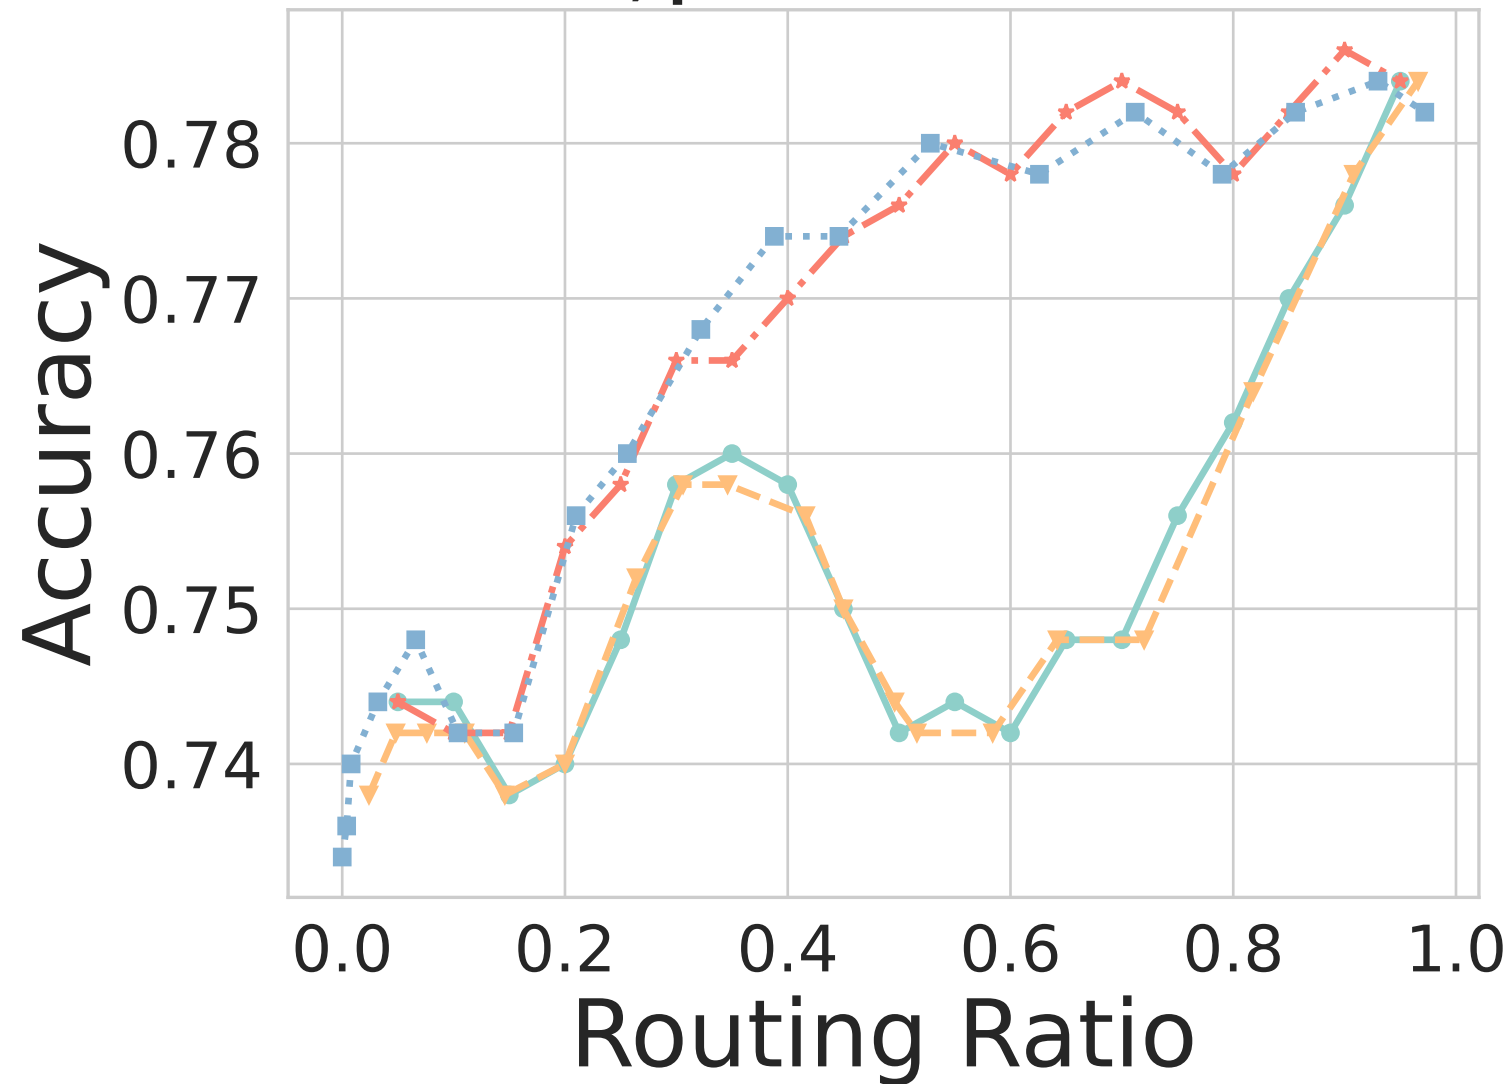

Supplement: supplementary_material [file cali_down_winogrande_phi-3.5-mini_gpt-4.1-mini.pdf › Routing_SLM_LLMs/Proxy_routing_prediction/to_gpt-4.1-mini/winogrande_as_downstream/cali_down_winogrande_phi-3.5-mini_gpt-4.1-mini.pdf]

# WinoGrande, phi-4-mini-reasoning to GPT-4.1 mini

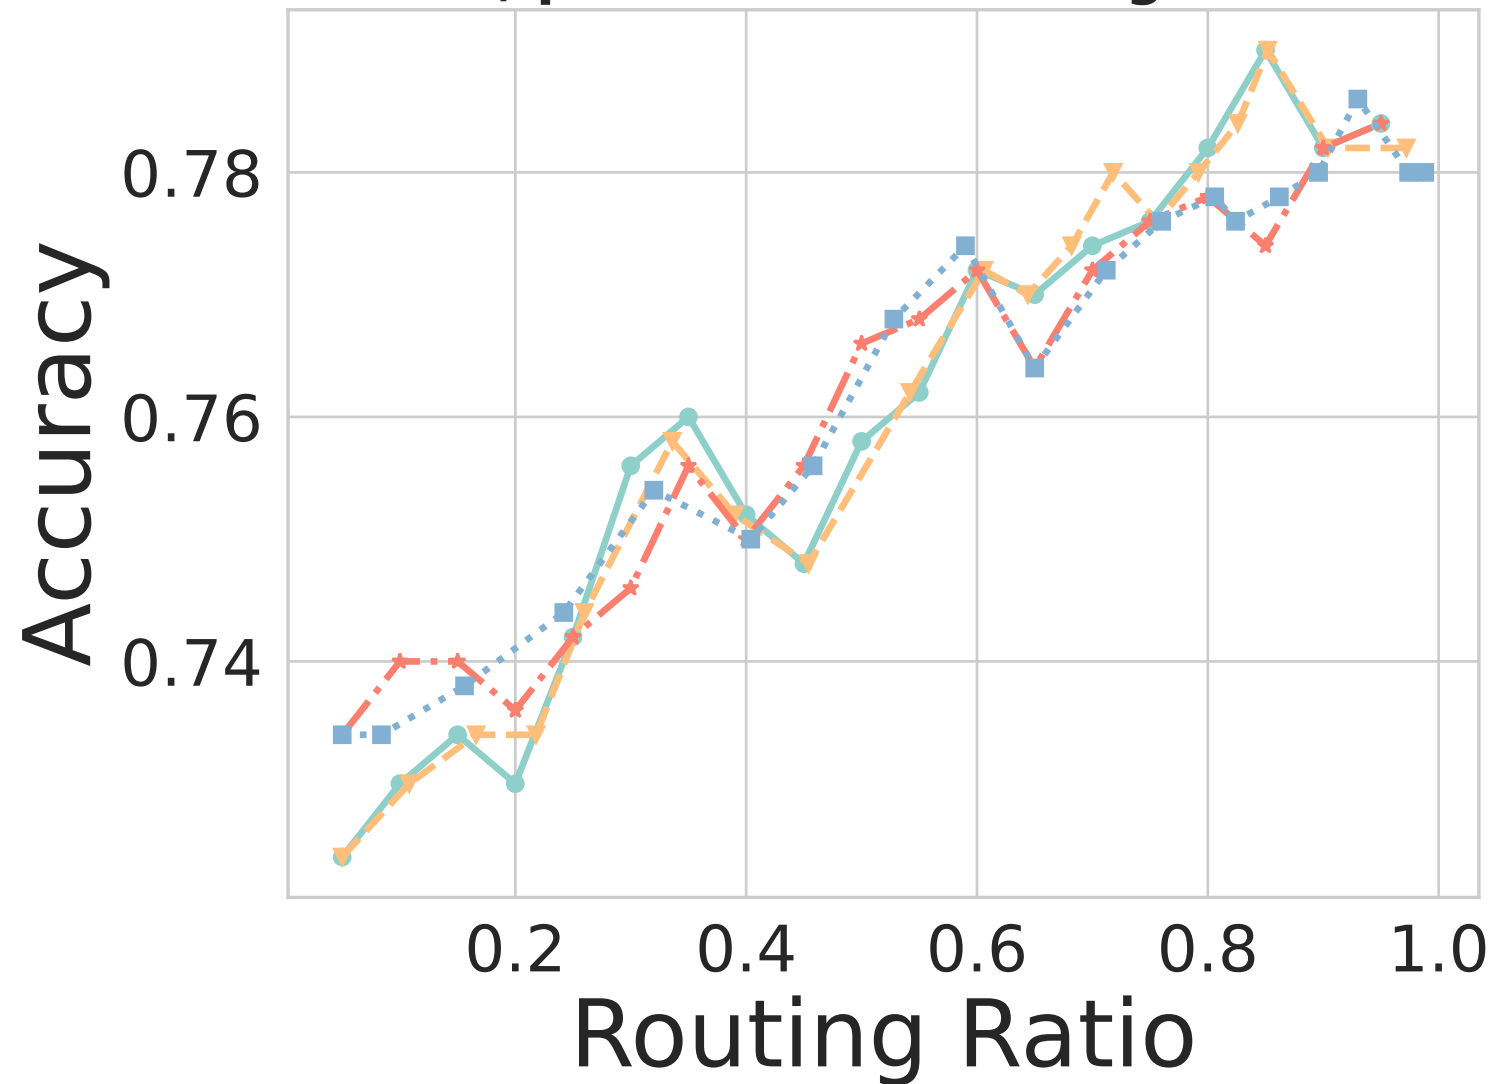

Supplement: supplementary_material [file cali_down_winogrande_phi-4-mini-reasoning_gpt-4.1-mini.pdf › Routing_SLM_LLMs/Proxy_routing_prediction/to_gpt-4.1-mini/winogrande_as_downstream/cali_down_winogrande_phi-4-mini-reasoning_gpt-4.1-mini.pdf]

WinoGrande, qwen-2.5-7b to GPT-4.1 mini

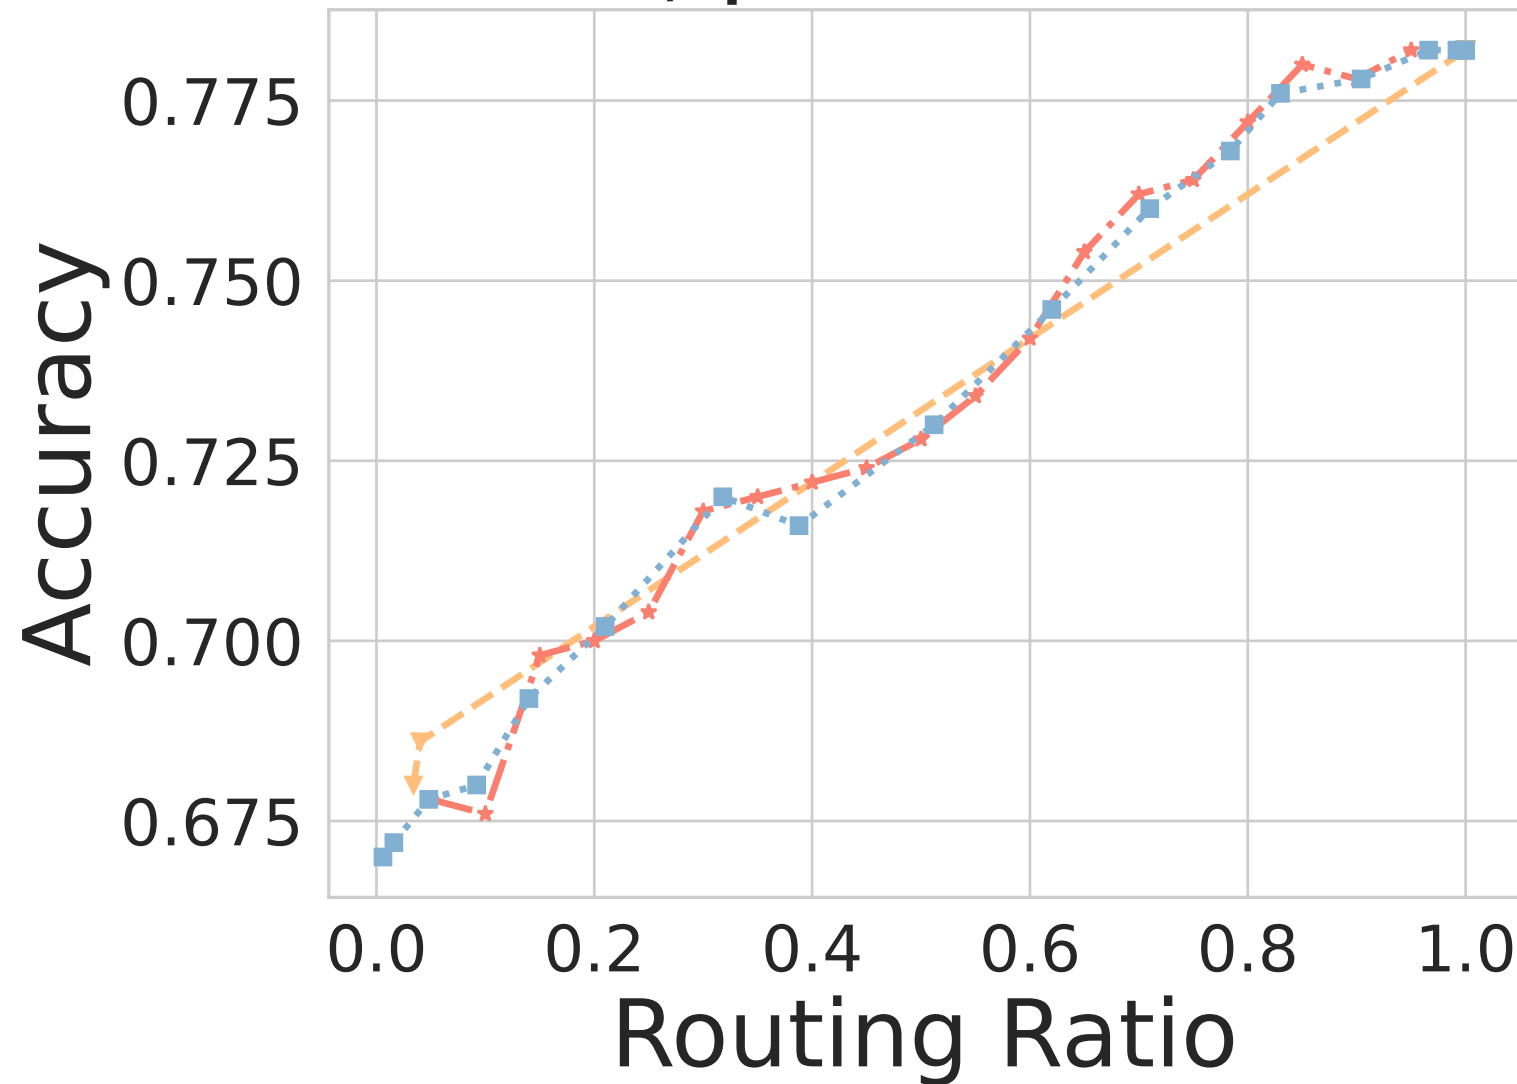

Supplement: supplementary_material [file cali_down_winogrande_qwen-2.5-7b_gpt-4.1-mini.pdf › Routing_SLM_LLMs/Proxy_routing_prediction/to_gpt-4.1-mini/winogrande_as_downstream/cali_down_winogrande_qwen-2.5-7b_gpt-4.1-mini.pdf]

**WinoGrande, rwkv to GPT-4.1 mini**

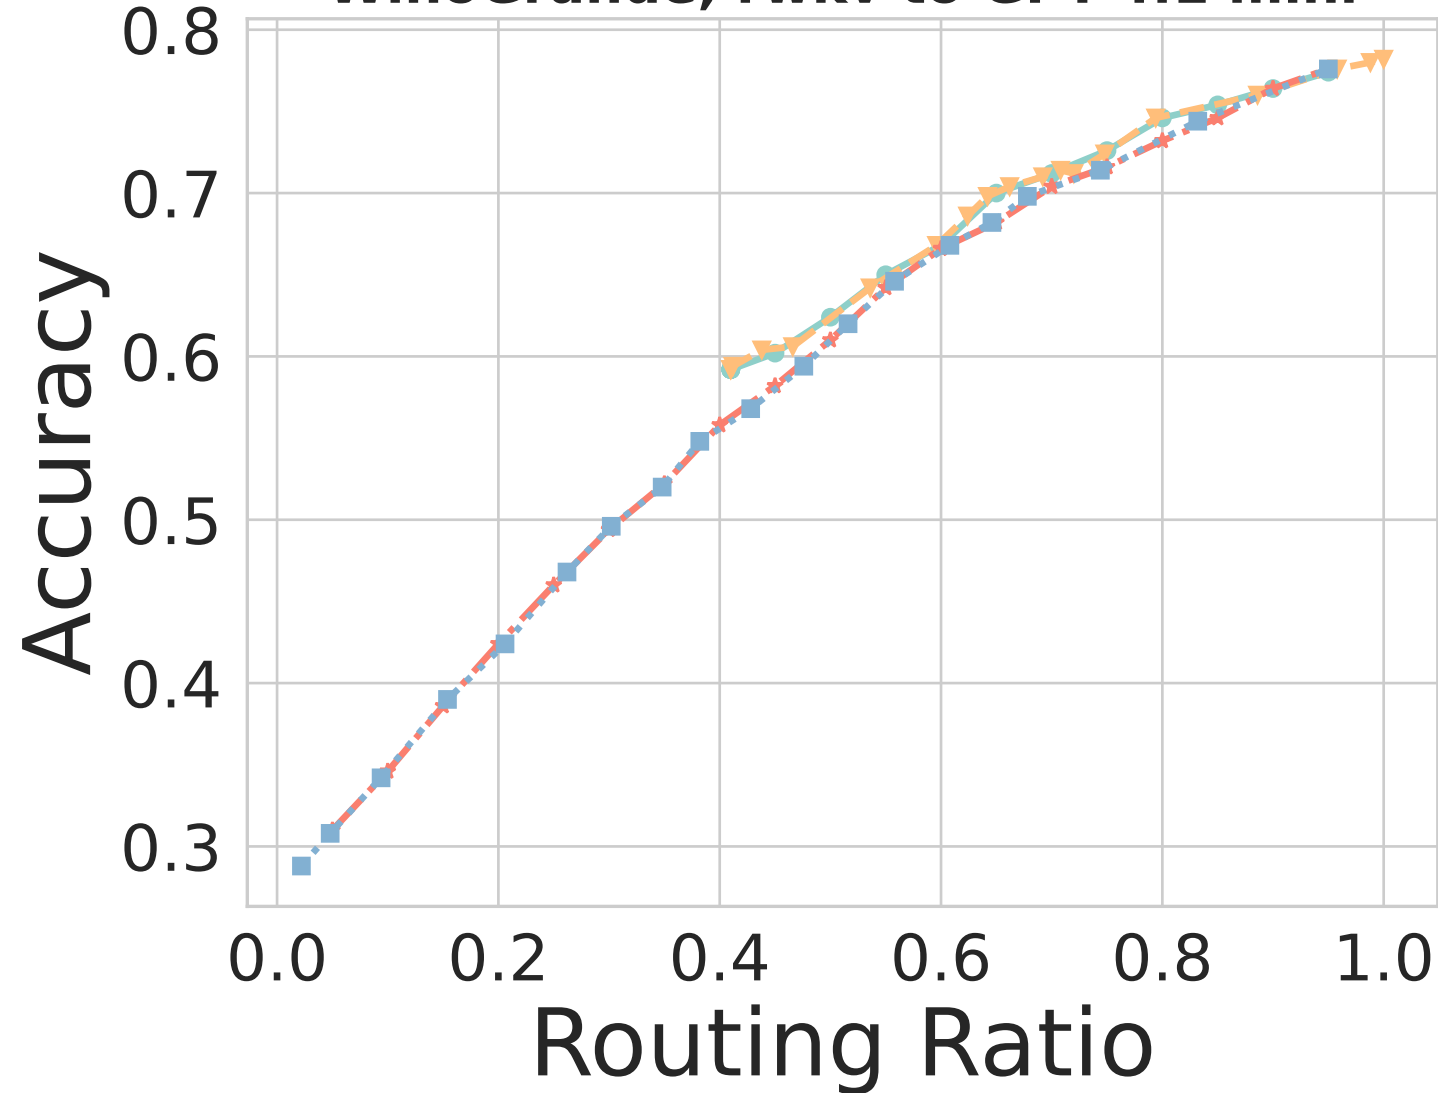

Supplement: supplementary_material [file cali_down_winogrande_rwkv_gpt-4.1-mini.pdf › Routing_SLM_LLMs/Proxy_routing_prediction/to_gpt-4.1-mini/winogrande_as_downstream/cali_down_winogrande_rwkv_gpt-4.1-mini.pdf]

**AQuA, Qwen3-0.6B to Llama-3.1-70B**

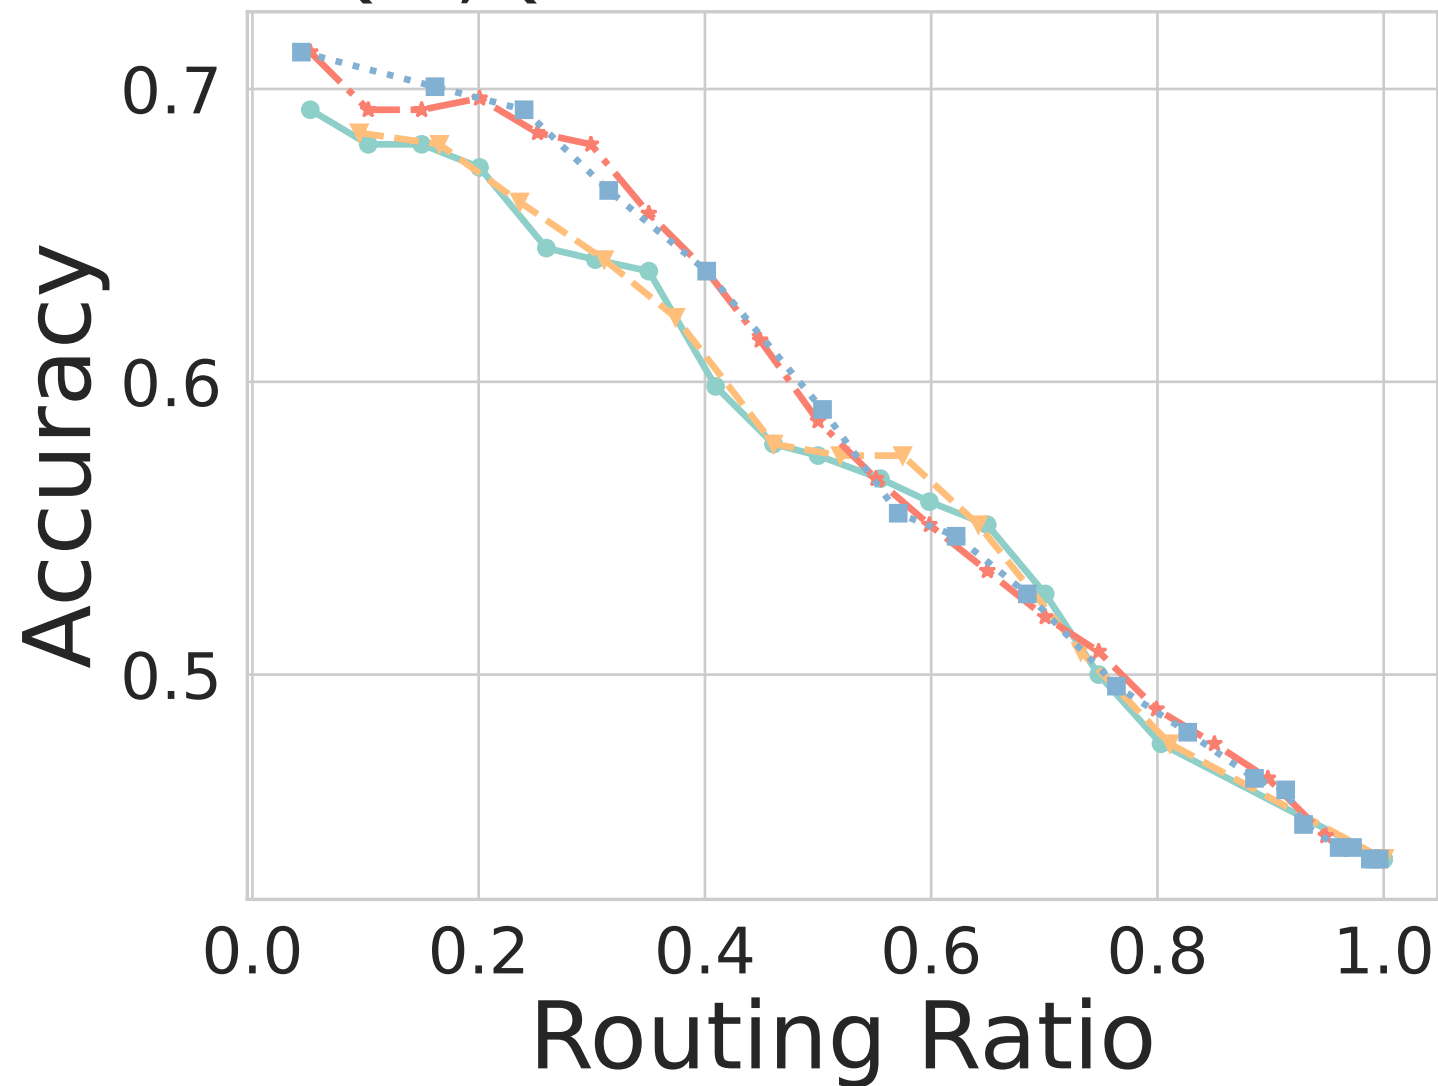

Supplement: supplementary_material [file cali_down_aqua_Qwen3-0.6B_meta-llama_Llama-3.1-70B-Instruct.pdf › Routing_SLM_LLMs/Proxy_routing_prediction/to_meta-llama_Llama-3.1-70B-Instruct/aqua_as_downstream/cali_down_aqua_Qwen3-0.6B_meta-llama_Llama-3.1-70B-Instruct.pdf]

**AQuA, Qwen3-1.7B to Llama-3.1-70B**

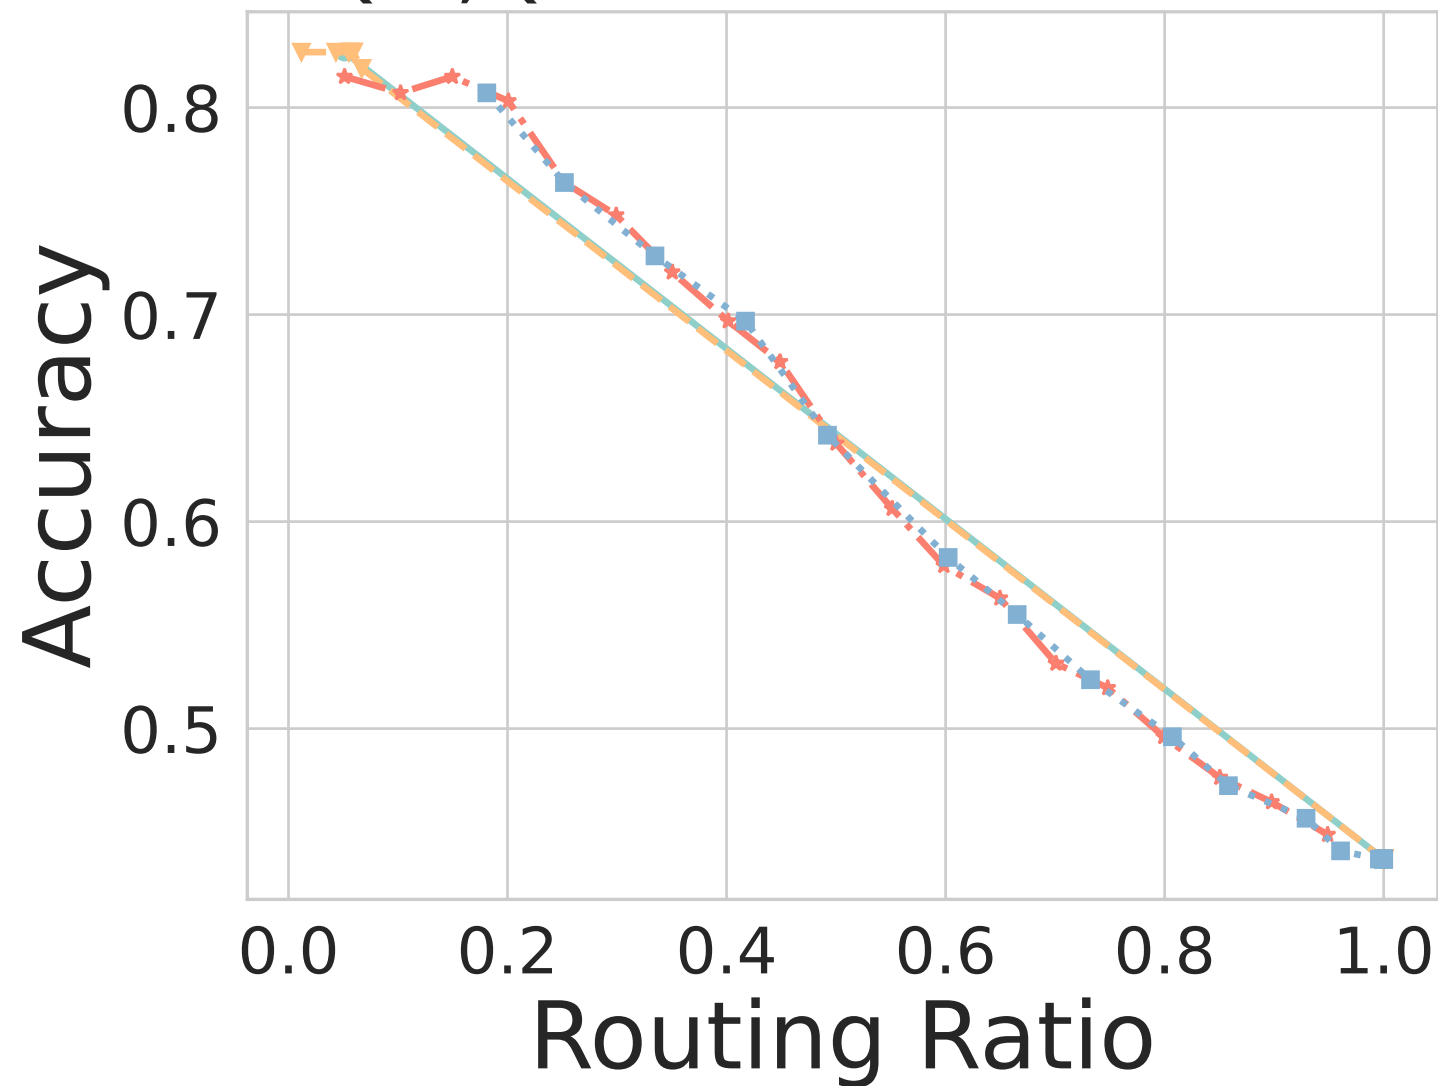

Supplement: supplementary_material [file cali_down_aqua_Qwen3-1.7B_meta-llama_Llama-3.1-70B-Instruct.pdf › Routing_SLM_LLMs/Proxy_routing_prediction/to_meta-llama_Llama-3.1-70B-Instruct/aqua_as_downstream/cali_down_aqua_Qwen3-1.7B_meta-llama_Llama-3.1-70B-Instruct.pdf]

**AQuA, Qwen3-4B to Llama-3.1-70B**

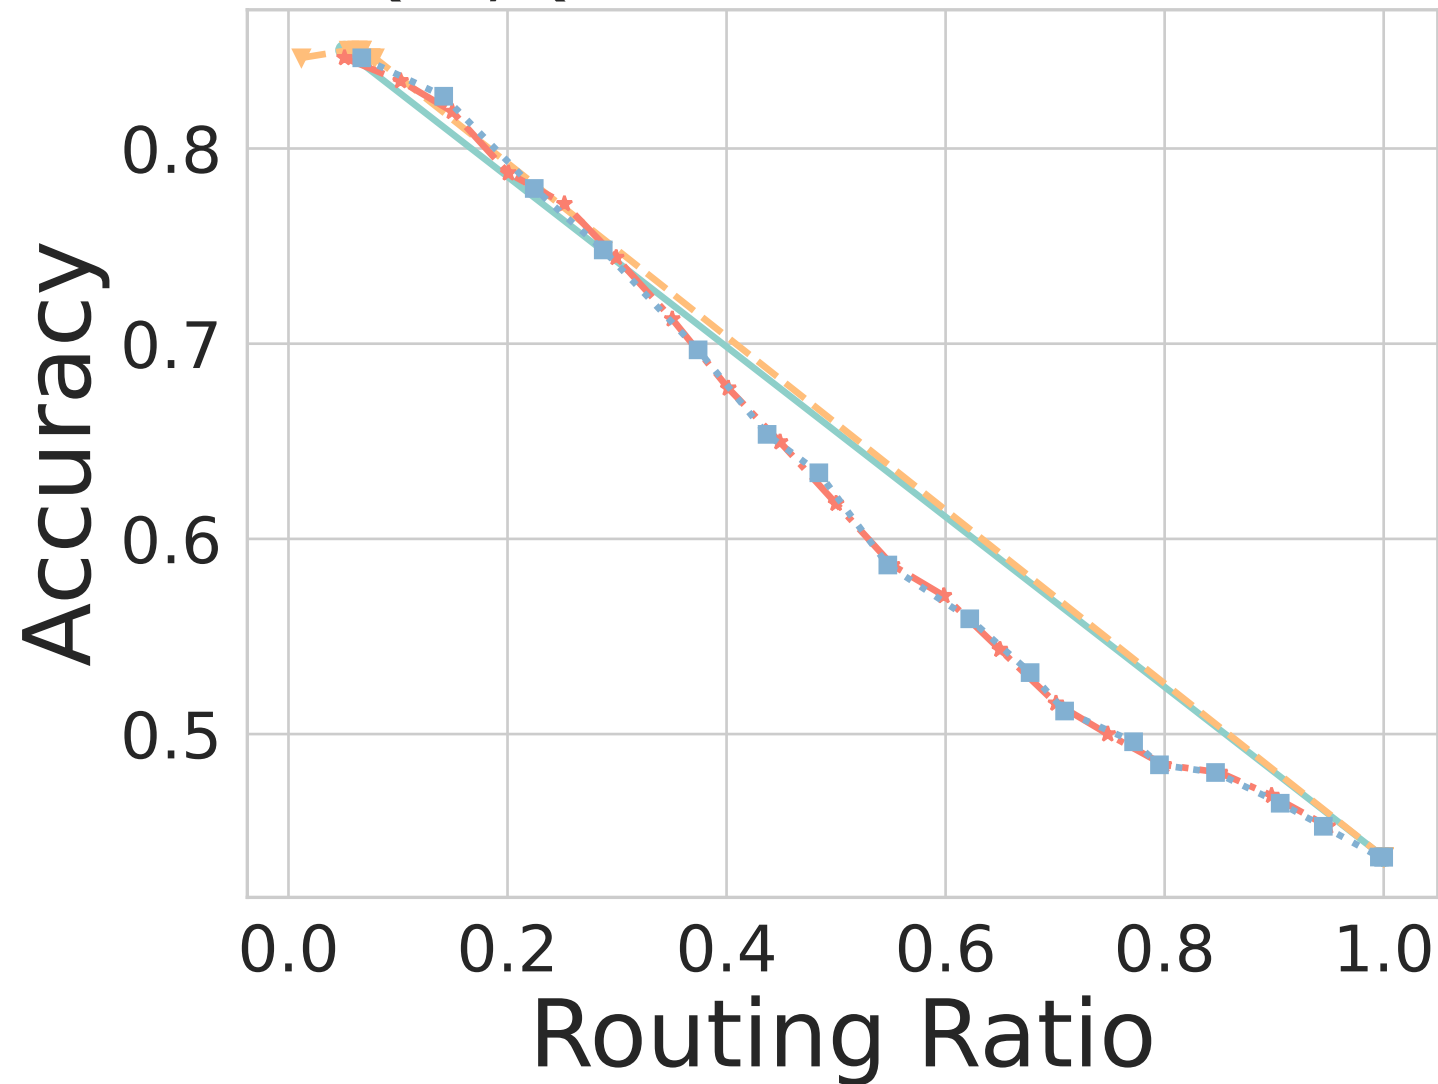

Supplement: supplementary_material [file cali_down_aqua_Qwen3-4B_meta-llama_Llama-3.1-70B-Instruct.pdf › Routing_SLM_LLMs/Proxy_routing_prediction/to_meta-llama_Llama-3.1-70B-Instruct/aqua_as_downstream/cali_down_aqua_Qwen3-4B_meta-llama_Llama-3.1-70B-Instruct.pdf]

**AQuA, granite-3.1-8b to Llama-3.1-70B**

Accuracy

0.45  
0.40  
0.35  
0.30  
0.25

0.0 0.2 0.4 0.6 0.8 1.0  
Routing Ratio

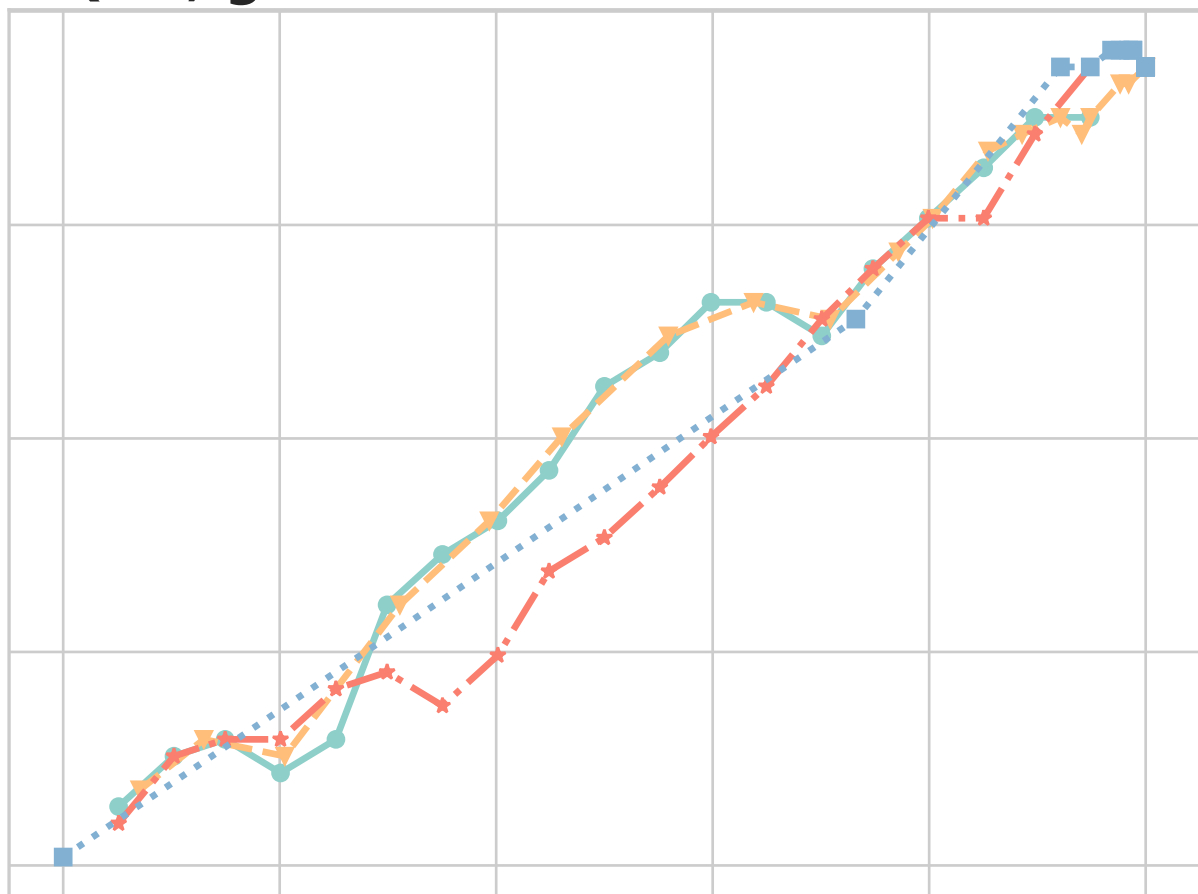

Supplement: supplementary_material [file cali_down_aqua_granite-3.1-8b_meta-llama_Llama-3.1-70B-Instruct.pdf › Routing_SLM_LLMs/Proxy_routing_prediction/to_meta-llama_Llama-3.1-70B-Instruct/aqua_as_downstream/cali_down_aqua_granite-3.1-8b_meta-llama_Llama-3.1-70B-Instruct.pdf]

**AQuA, llama-3.1-8b to Llama-3.1-70B**

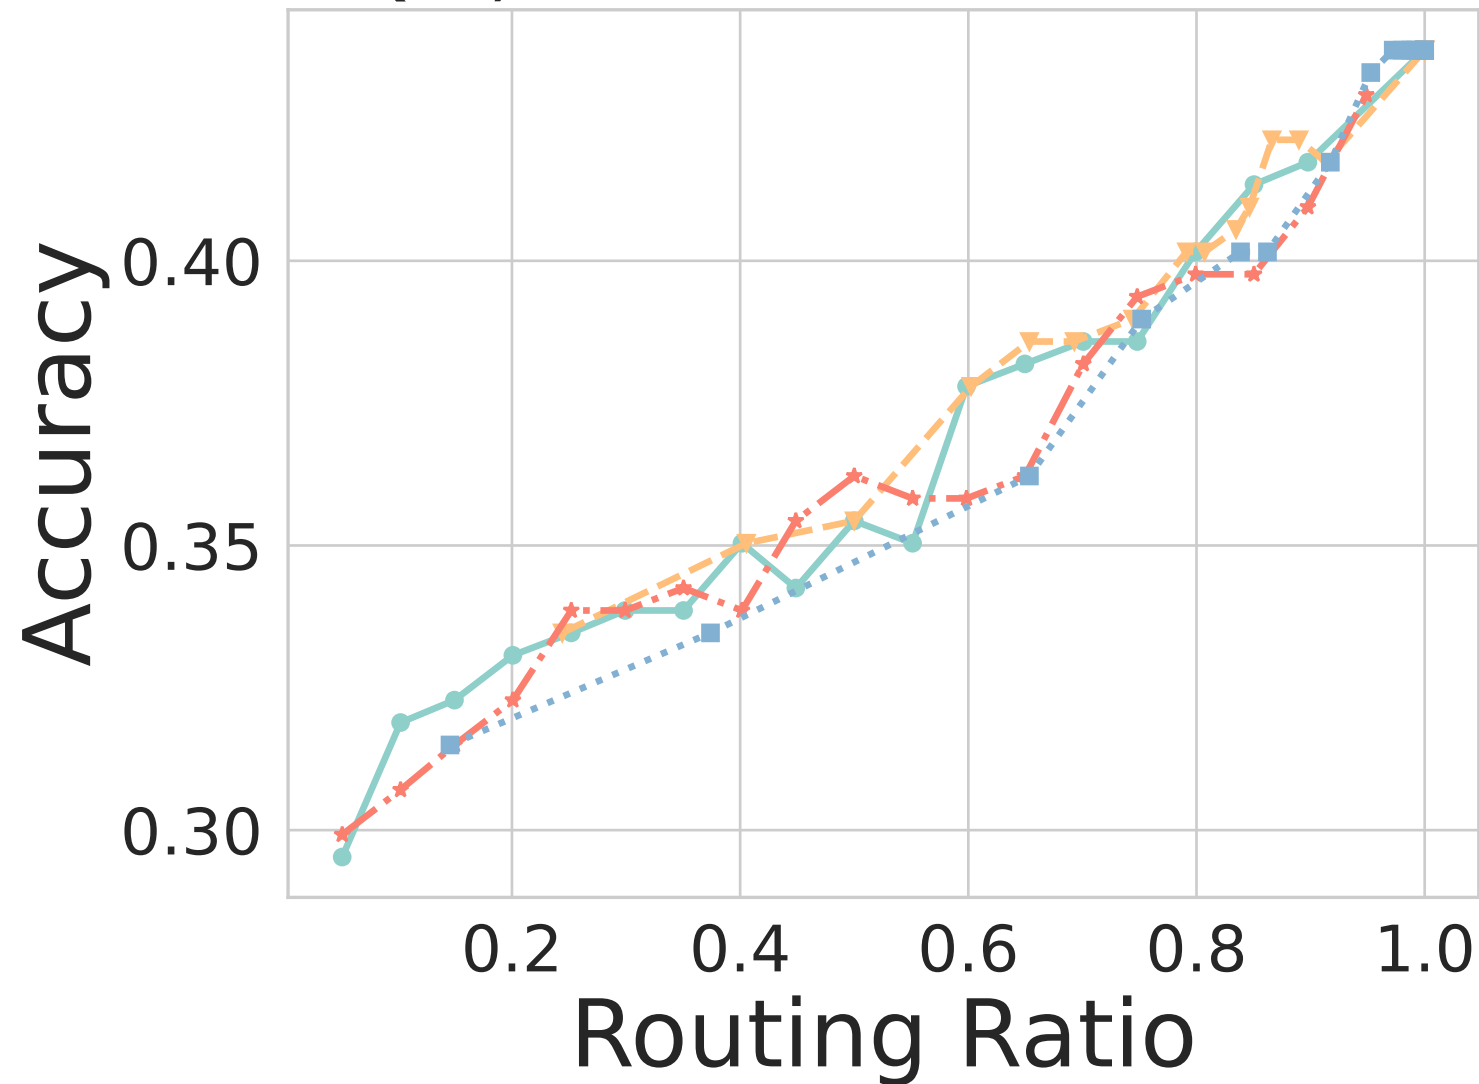

Supplement: supplementary_material [file cali_down_aqua_llama-3.1-8b_meta-llama_Llama-3.1-70B-Instruct.pdf › Routing_SLM_LLMs/Proxy_routing_prediction/to_meta-llama_Llama-3.1-70B-Instruct/aqua_as_downstream/cali_down_aqua_llama-3.1-8b_meta-llama_Llama-3.1-70B-Instruct.pdf]

**AQuA, llama-3.2-1b to Llama-3.1-70B**

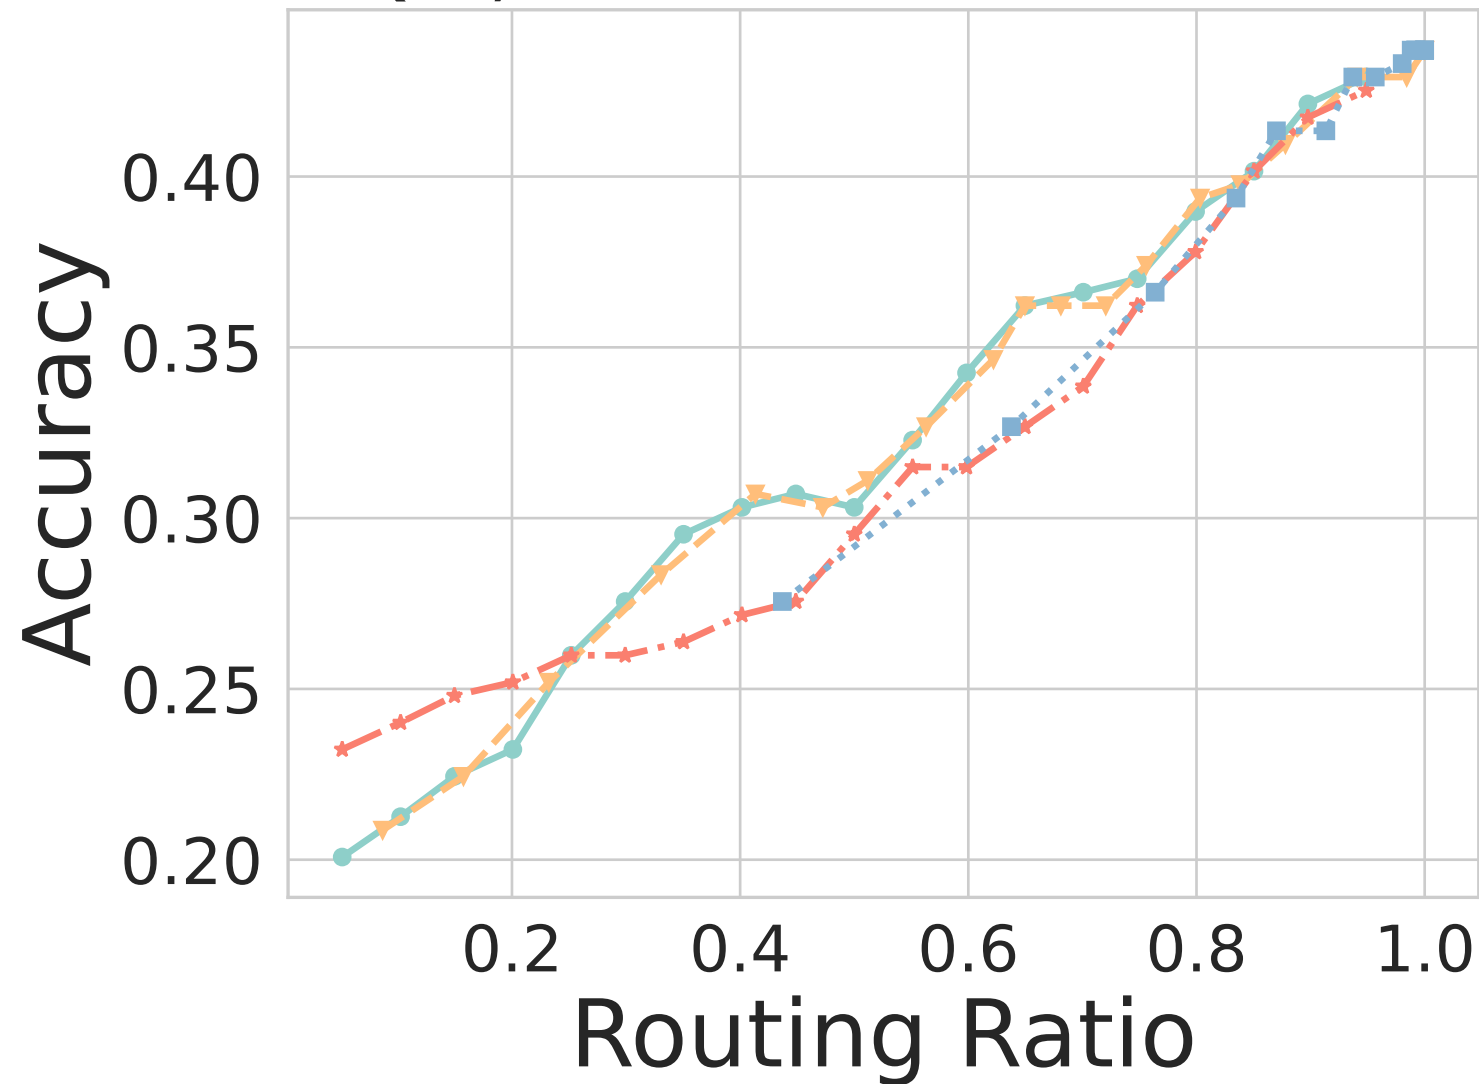

Supplement: supplementary_material [file cali_down_aqua_llama-3.2-1b_meta-llama_Llama-3.1-70B-Instruct.pdf › Routing_SLM_LLMs/Proxy_routing_prediction/to_meta-llama_Llama-3.1-70B-Instruct/aqua_as_downstream/cali_down_aqua_llama-3.2-1b_meta-llama_Llama-3.1-70B-Instruct.pdf]

**AQuA, llama-3.2-3b to Llama-3.1-70B**

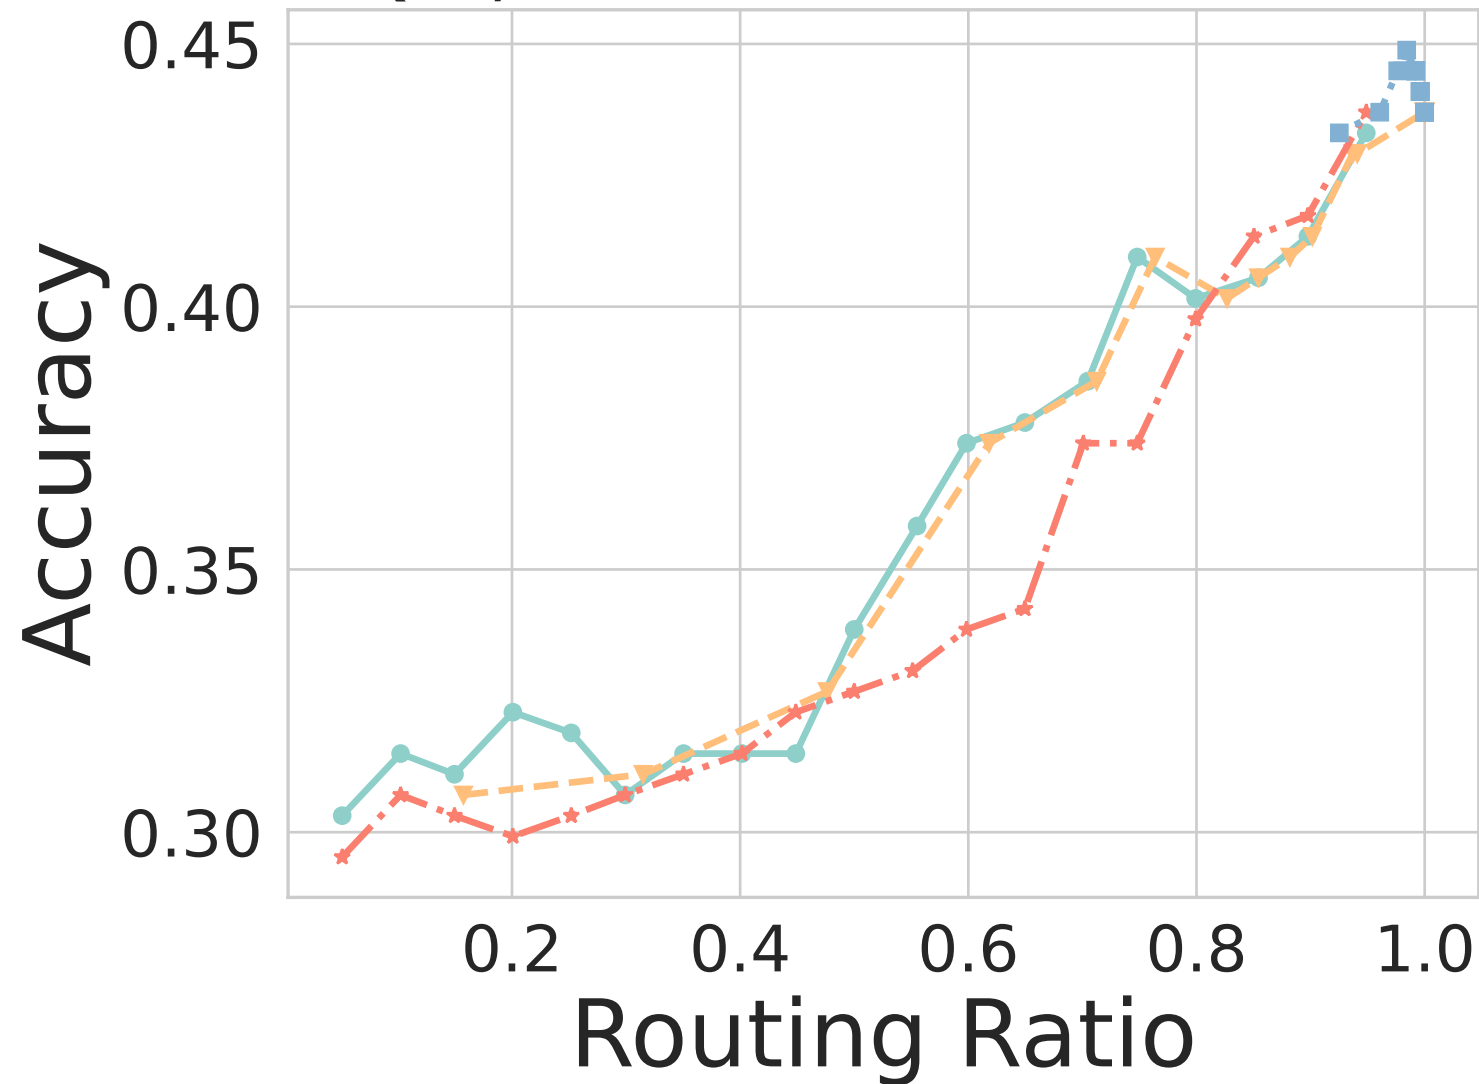

Supplement: supplementary_material [file cali_down_aqua_llama-3.2-3b_meta-llama_Llama-3.1-70B-Instruct.pdf › Routing_SLM_LLMs/Proxy_routing_prediction/to_meta-llama_Llama-3.1-70B-Instruct/aqua_as_downstream/cali_down_aqua_llama-3.2-3b_meta-llama_Llama-3.1-70B-Instruct.pdf]

**AQuA, mistral-7b to Llama-3.1-70B**

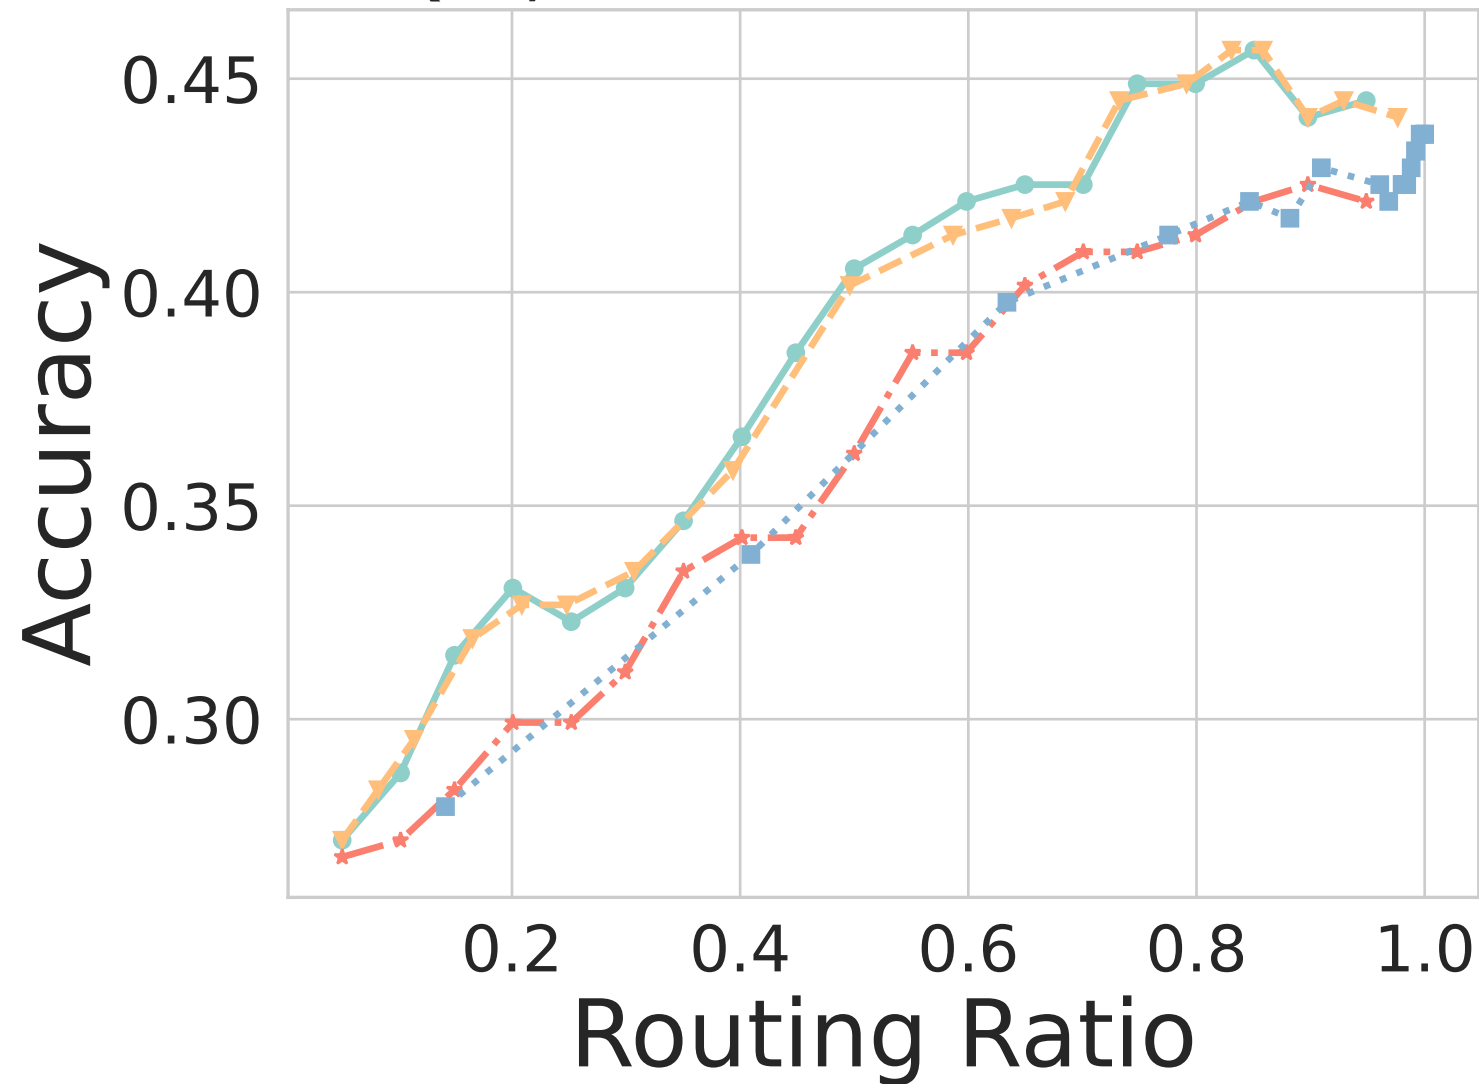

Supplement: supplementary_material [file cali_down_aqua_mistral-7b_meta-llama_Llama-3.1-70B-Instruct.pdf › Routing_SLM_LLMs/Proxy_routing_prediction/to_meta-llama_Llama-3.1-70B-Instruct/aqua_as_downstream/cali_down_aqua_mistral-7b_meta-llama_Llama-3.1-70B-Instruct.pdf]

**AQuA, phi-3.5-mini to Llama-3.1-70B**

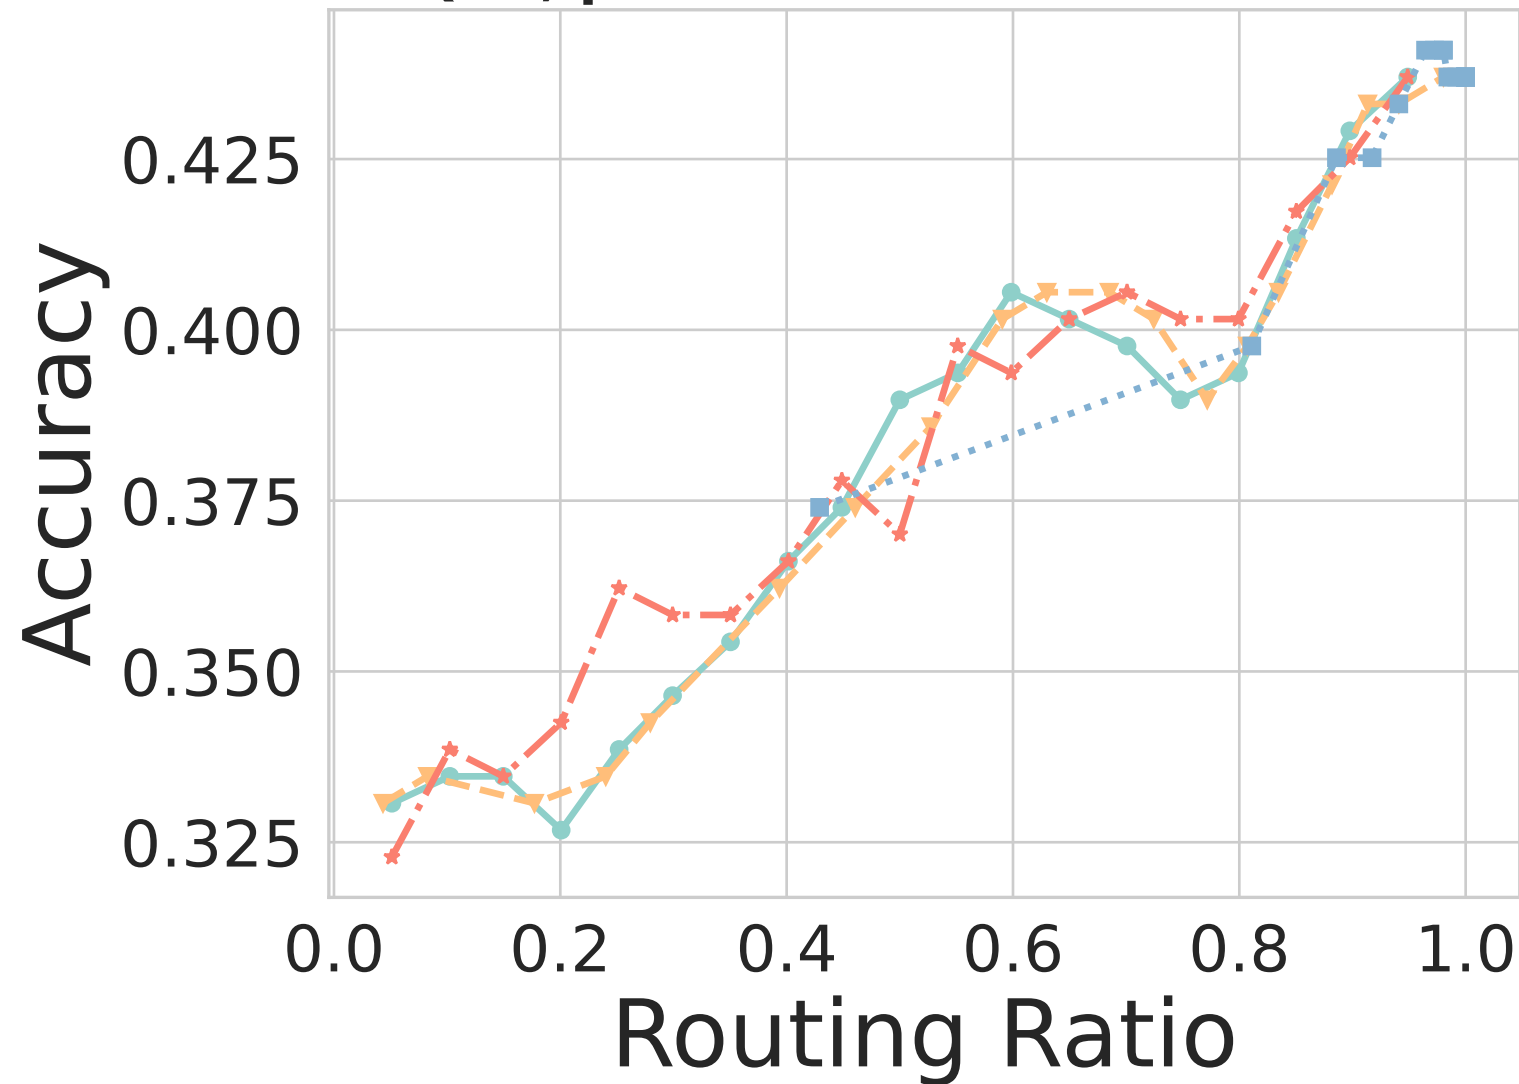

Supplement: supplementary_material [file cali_down_aqua_phi-3.5-mini_meta-llama_Llama-3.1-70B-Instruct.pdf › Routing_SLM_LLMs/Proxy_routing_prediction/to_meta-llama_Llama-3.1-70B-Instruct/aqua_as_downstream/cali_down_aqua_phi-3.5-mini_meta-llama_Llama-3.1-70B-Instruct.pdf]

# AQuA, phi-4-mini-reasoning to Llama-3.1-70B

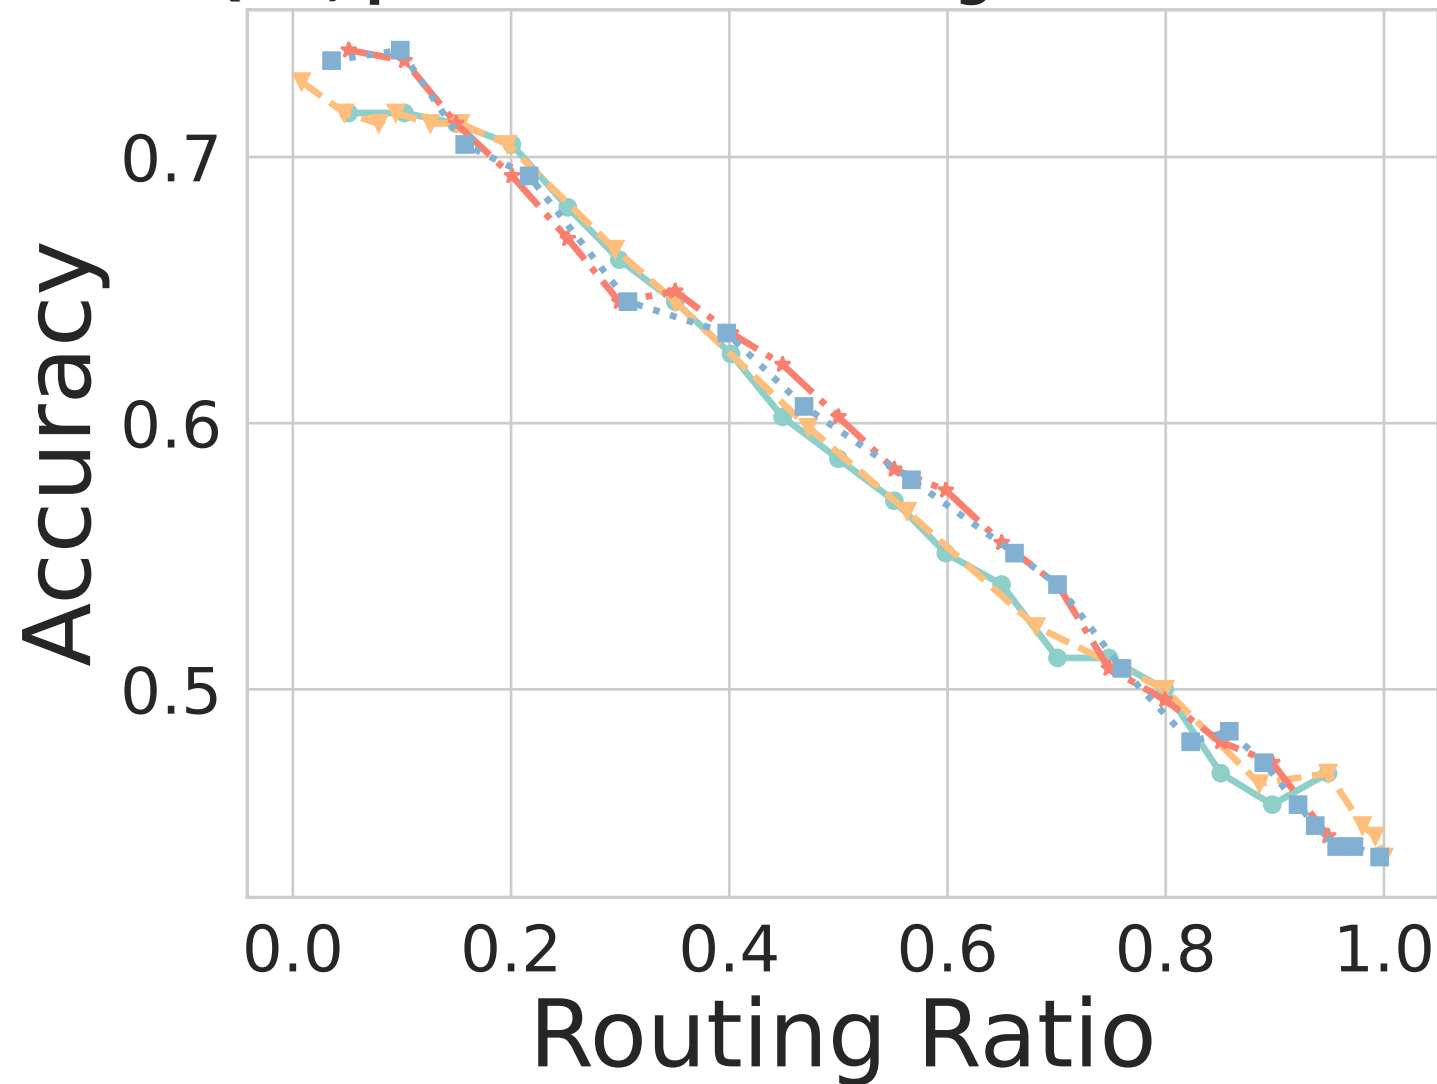

Supplement: supplementary_material [file cali_down_aqua_phi-4-mini-reasoning_meta-llama_Llama-3.1-70B-Instruct.pdf › Routing_SLM_LLMs/Proxy_routing_prediction/to_meta-llama_Llama-3.1-70B-Instruct/aqua_as_downstream/cali_down_aqua_phi-4-mini-reasoning_meta-llama_Llama-3.1-70B-Instruct.pdf]

**AQuA, qwen-2.5-7b to Llama-3.1-70B**

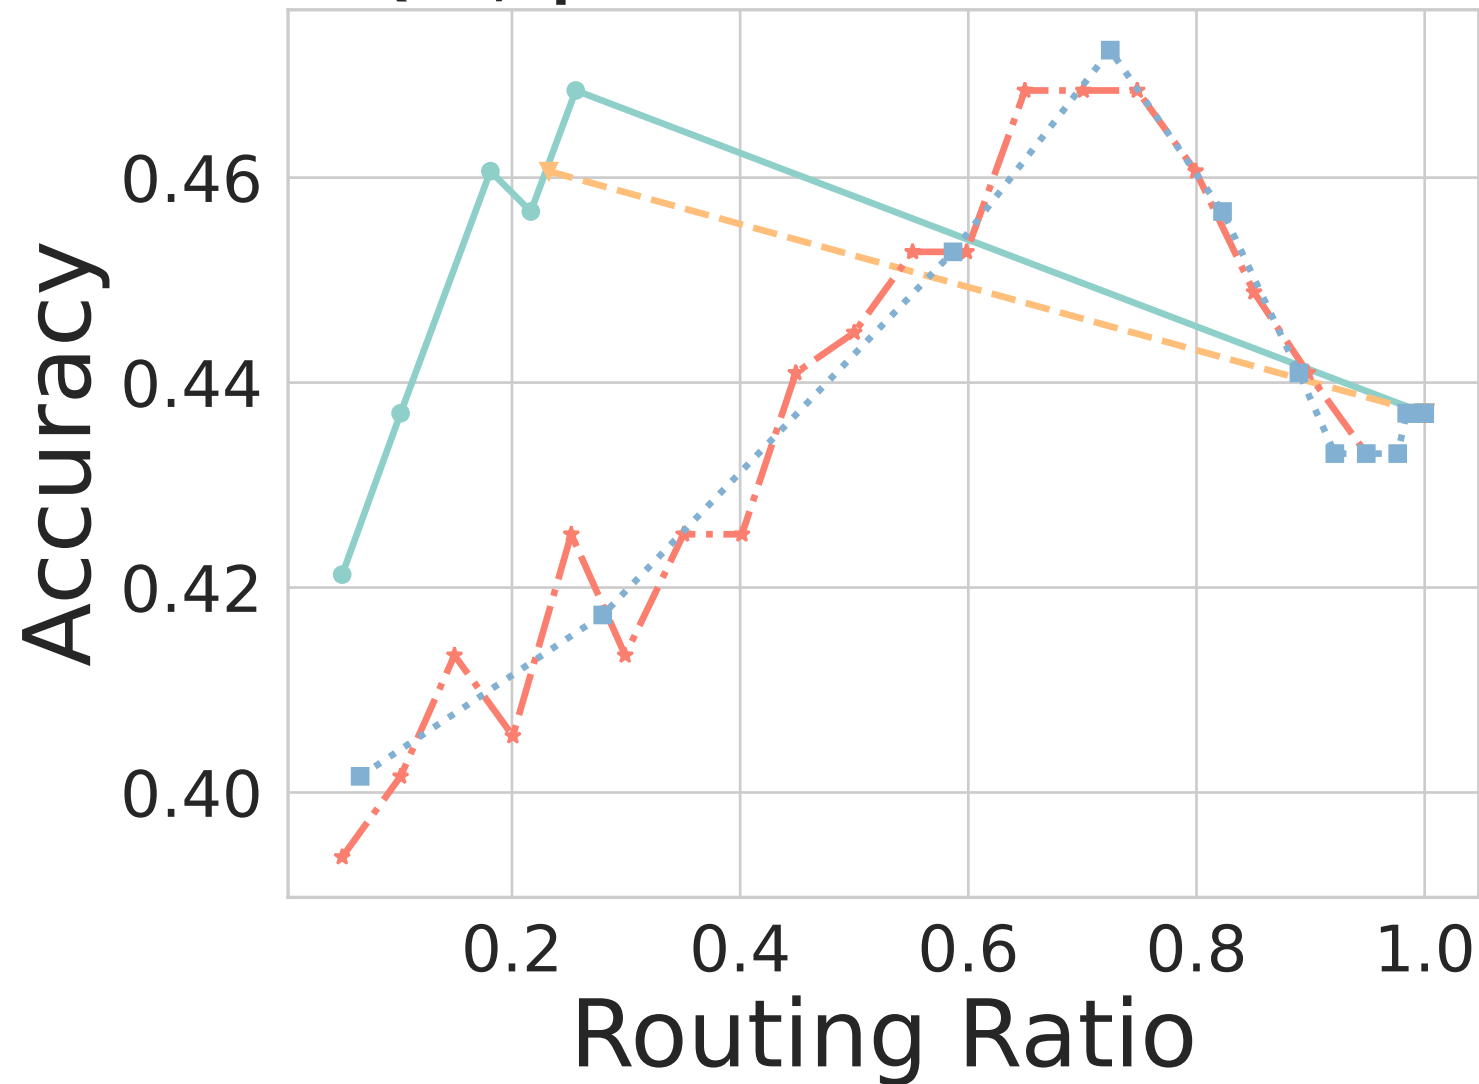

Supplement: supplementary_material [file cali_down_aqua_qwen-2.5-7b_meta-llama_Llama-3.1-70B-Instruct.pdf › Routing_SLM_LLMs/Proxy_routing_prediction/to_meta-llama_Llama-3.1-70B-Instruct/aqua_as_downstream/cali_down_aqua_qwen-2.5-7b_meta-llama_Llama-3.1-70B-Instruct.pdf]

**AQuA, rwkv to Llama-3.1-70B**

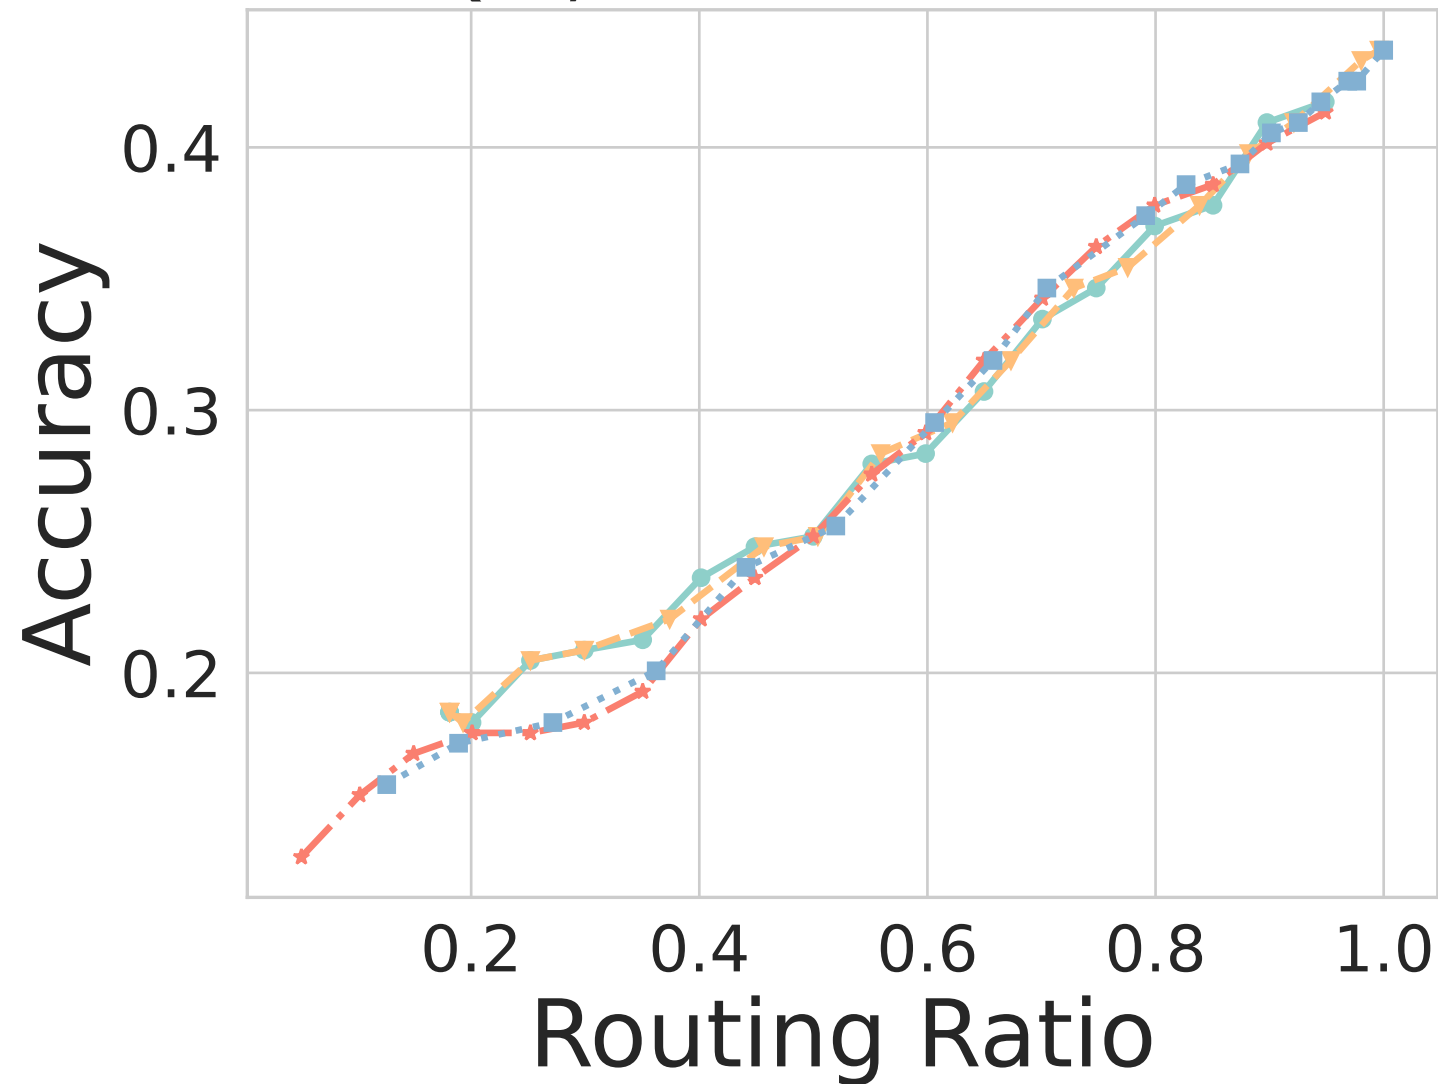

Supplement: supplementary_material [file cali_down_aqua_rwkv_meta-llama_Llama-3.1-70B-Instruct.pdf › Routing_SLM_LLMs/Proxy_routing_prediction/to_meta-llama_Llama-3.1-70B-Instruct/aqua_as_downstream/cali_down_aqua_rwkv_meta-llama_Llama-3.1-70B-Instruct.pdf]

**BoolQ, Qwen3-0.6B to Llama-3.1-70B**

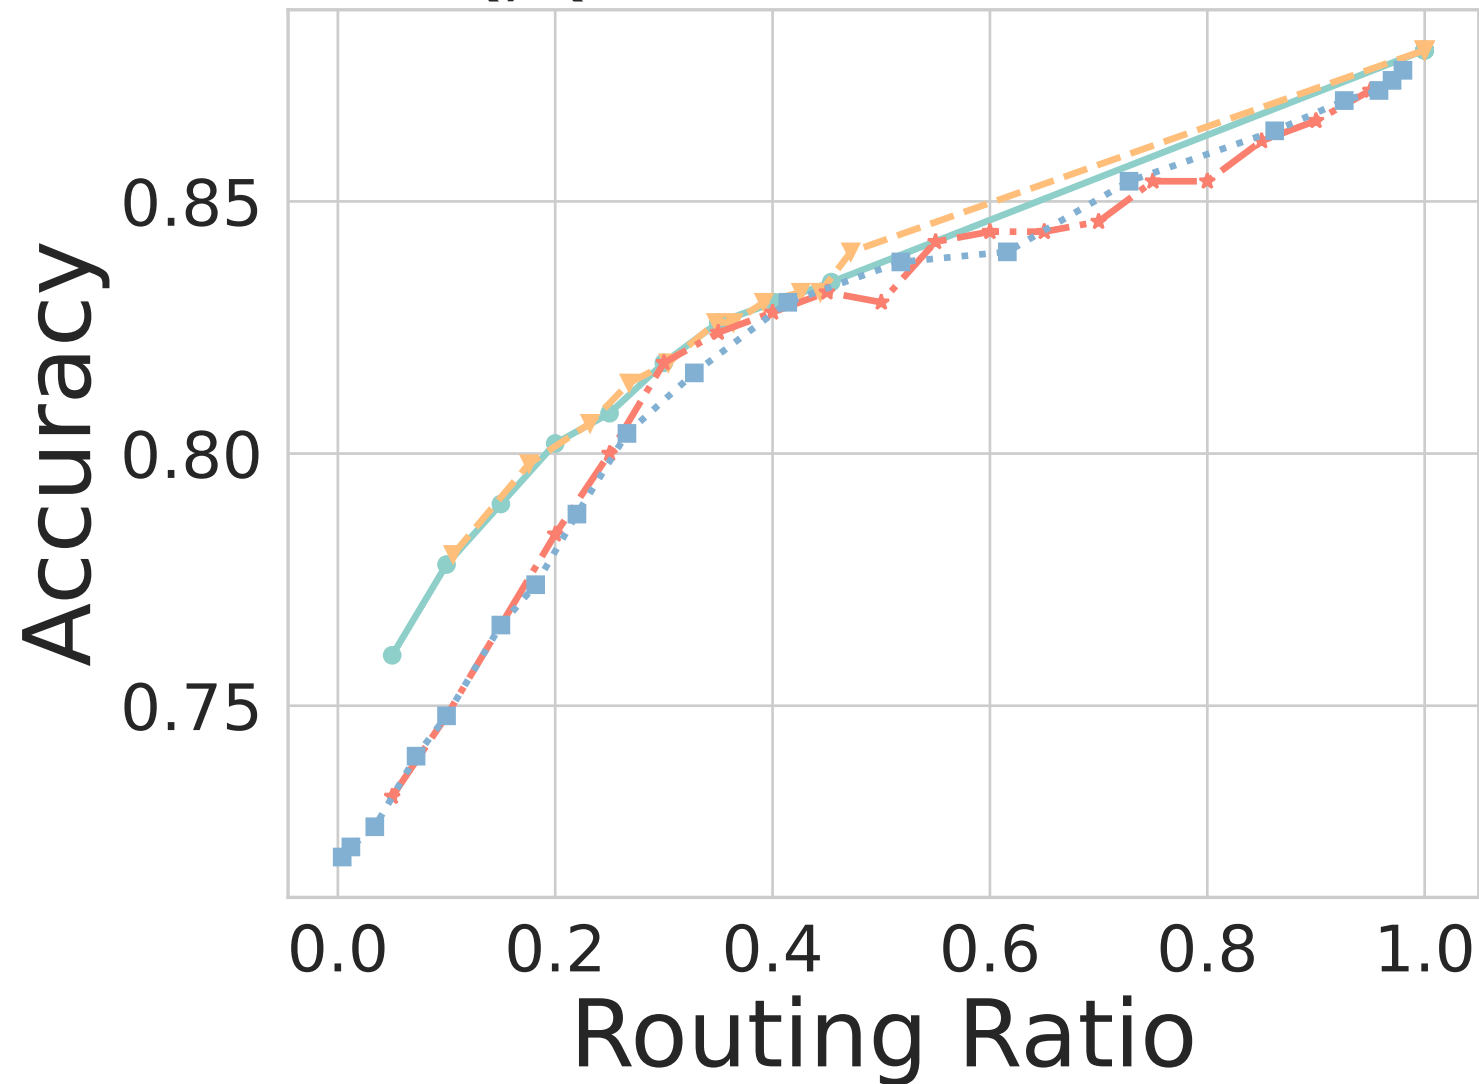

Supplement: supplementary_material [file cali_down_boolq_Qwen3-0.6B_meta-llama_Llama-3.1-70B-Instruct.pdf › Routing_SLM_LLMs/Proxy_routing_prediction/to_meta-llama_Llama-3.1-70B-Instruct/boolq_as_downstream/cali_down_boolq_Qwen3-0.6B_meta-llama_Llama-3.1-70B-Instruct.pdf]

**BoolQ, Qwen3-1.7B to Llama-3.1-70B**

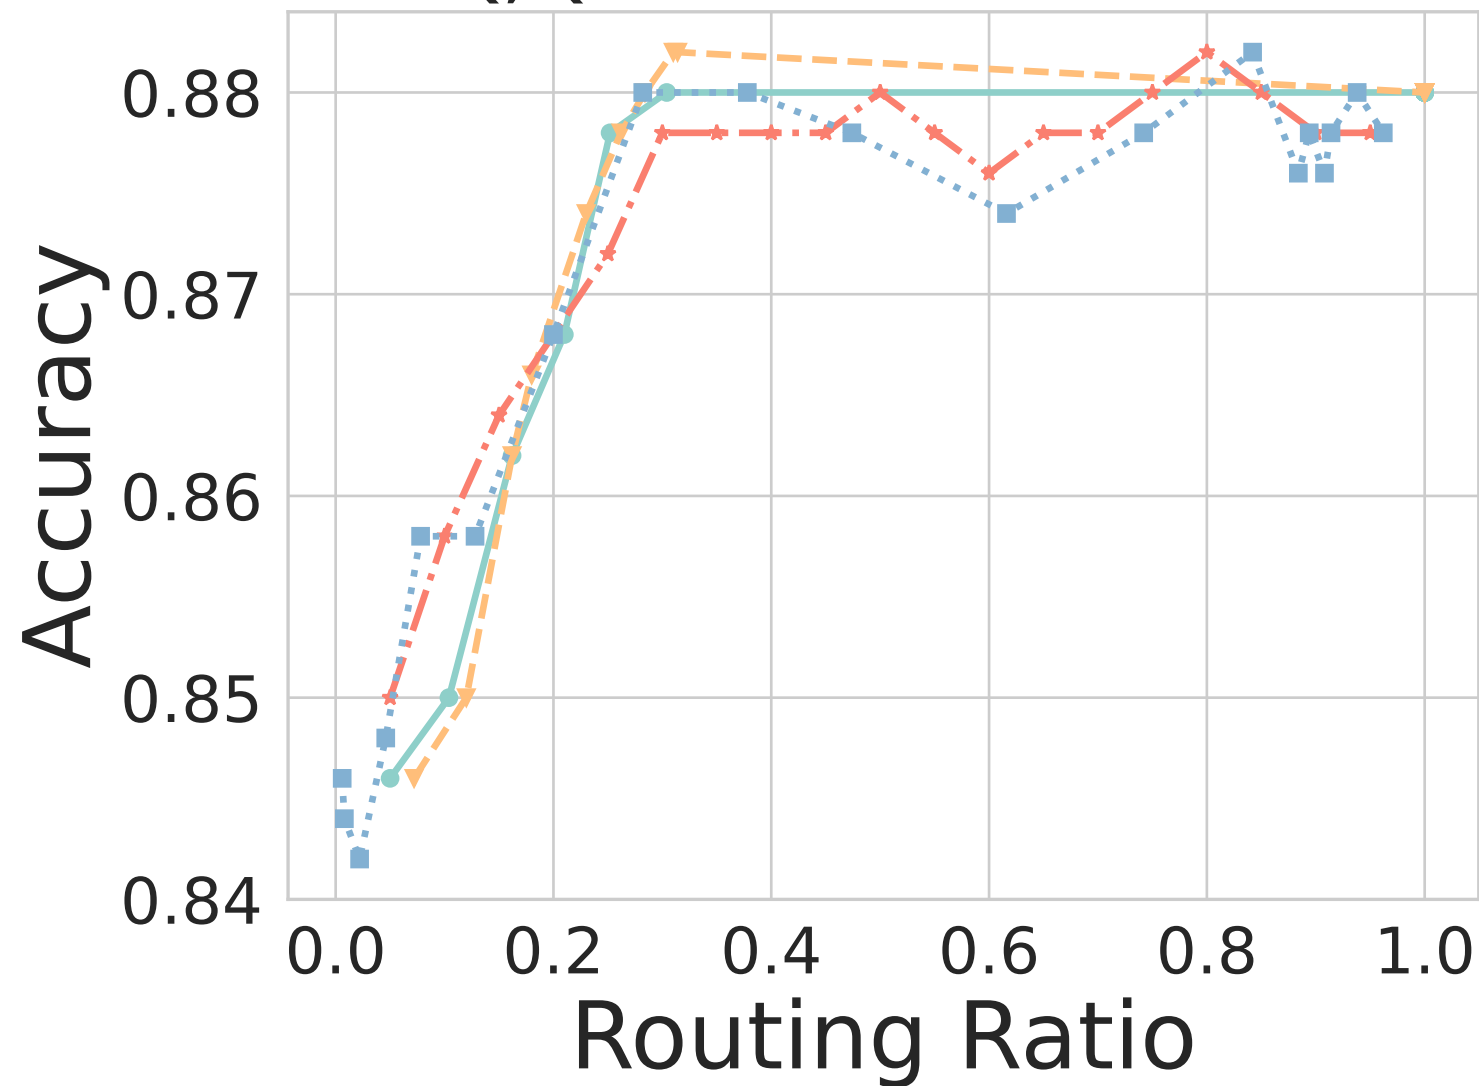

Supplement: supplementary_material [file cali_down_boolq_Qwen3-1.7B_meta-llama_Llama-3.1-70B-Instruct.pdf › Routing_SLM_LLMs/Proxy_routing_prediction/to_meta-llama_Llama-3.1-70B-Instruct/boolq_as_downstream/cali_down_boolq_Qwen3-1.7B_meta-llama_Llama-3.1-70B-Instruct.pdf]

**BoolQ, Qwen3-4B to Llama-3.1-70B**

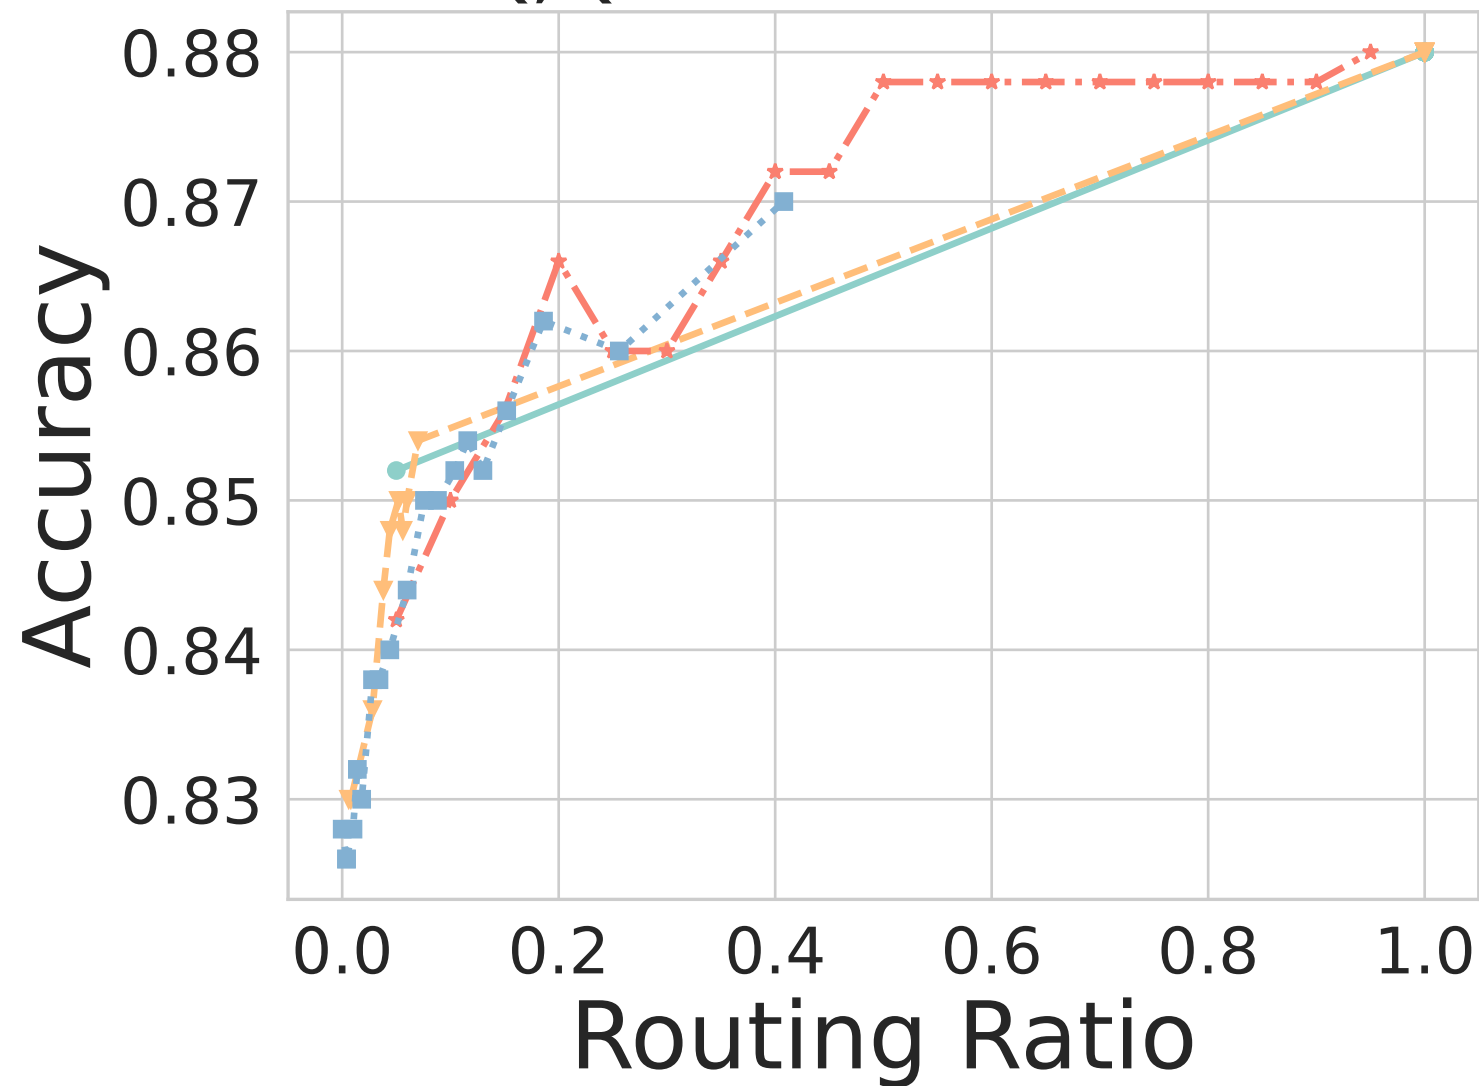

Supplement: supplementary_material [file cali_down_boolq_Qwen3-4B_meta-llama_Llama-3.1-70B-Instruct.pdf › Routing_SLM_LLMs/Proxy_routing_prediction/to_meta-llama_Llama-3.1-70B-Instruct/boolq_as_downstream/cali_down_boolq_Qwen3-4B_meta-llama_Llama-3.1-70B-Instruct.pdf]

**BoolQ, granite-3.1-8b to Llama-3.1-70B**

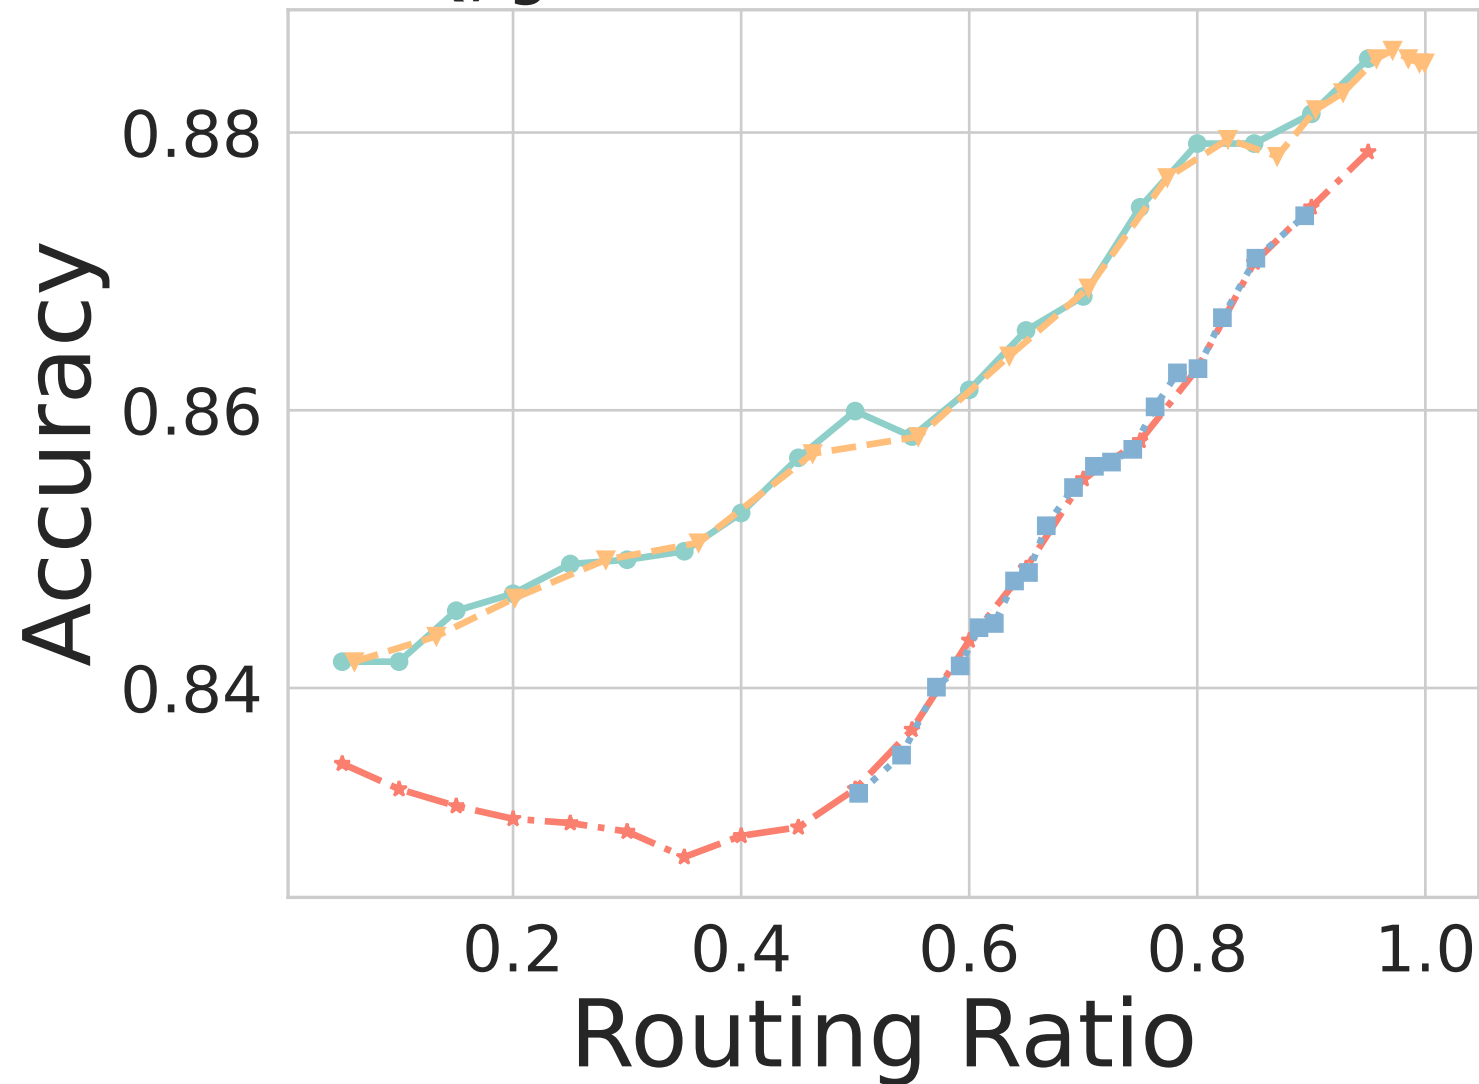

Supplement: supplementary_material [file cali_down_boolq_granite-3.1-8b_meta-llama_Llama-3.1-70B-Instruct.pdf › Routing_SLM_LLMs/Proxy_routing_prediction/to_meta-llama_Llama-3.1-70B-Instruct/boolq_as_downstream/cali_down_boolq_granite-3.1-8b_meta-llama_Llama-3.1-70B-Instruct.pdf]

**BoolQ, llama-3.1-8b to Llama-3.1-70B**

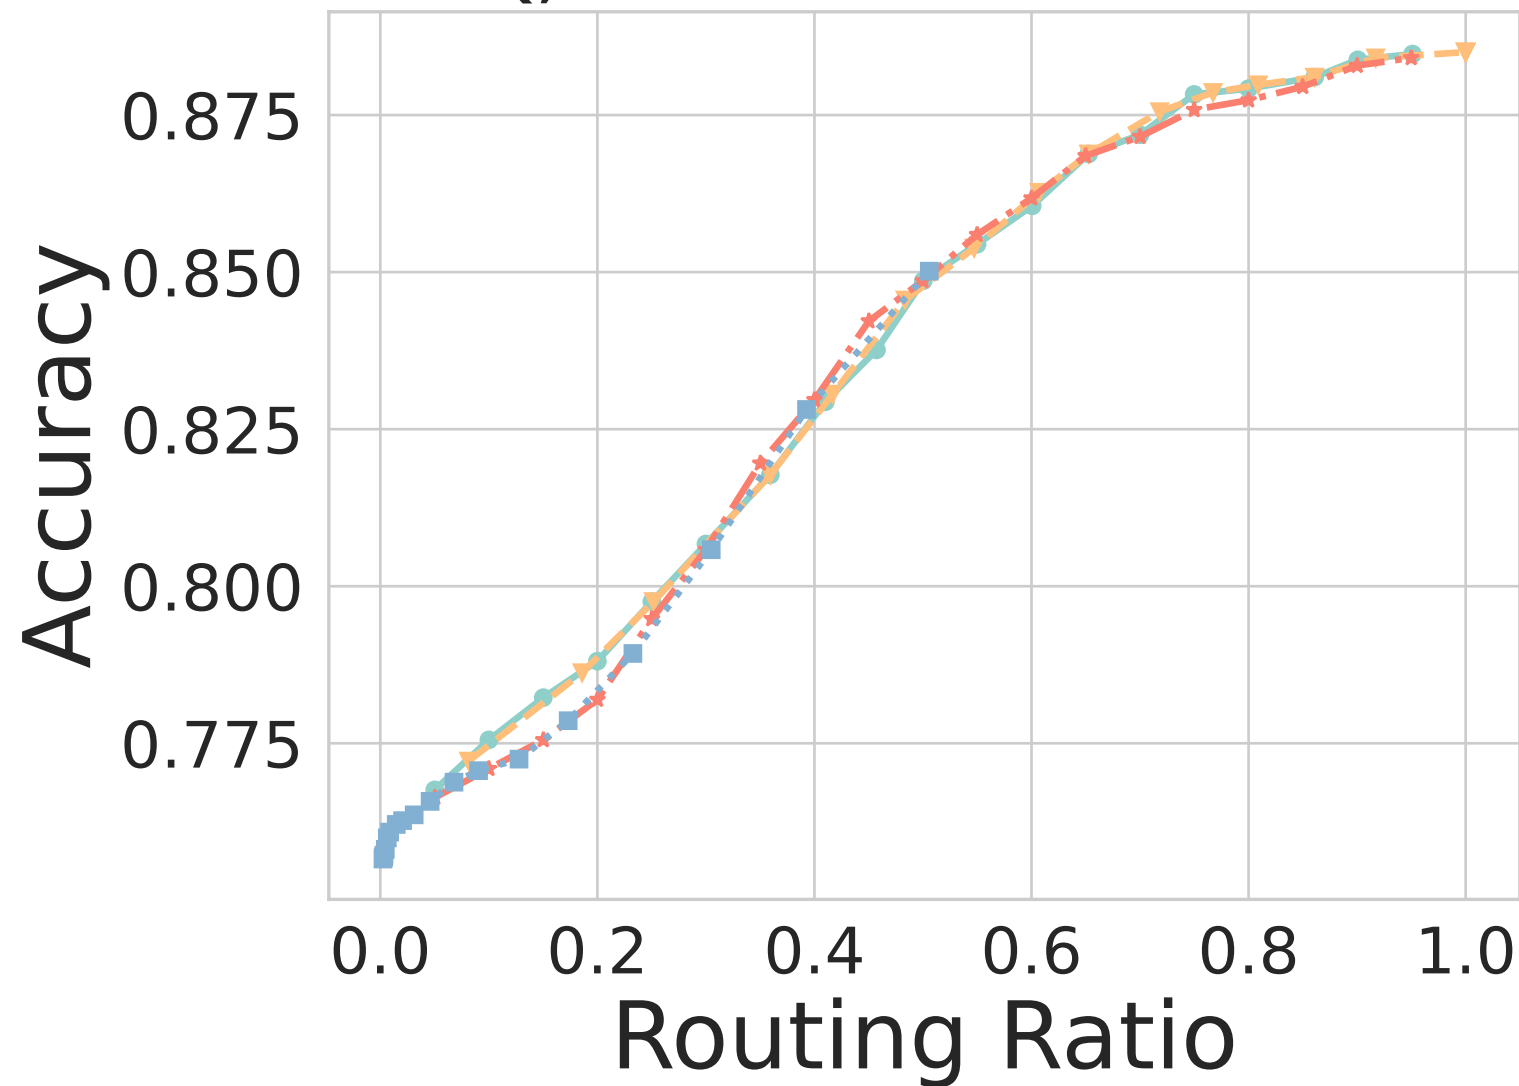

Supplement: supplementary_material [file cali_down_boolq_llama-3.1-8b_meta-llama_Llama-3.1-70B-Instruct.pdf › Routing_SLM_LLMs/Proxy_routing_prediction/to_meta-llama_Llama-3.1-70B-Instruct/boolq_as_downstream/cali_down_boolq_llama-3.1-8b_meta-llama_Llama-3.1-70B-Instruct.pdf]

**BoolQ, llama-3.2-1b to Llama-3.1-70B**

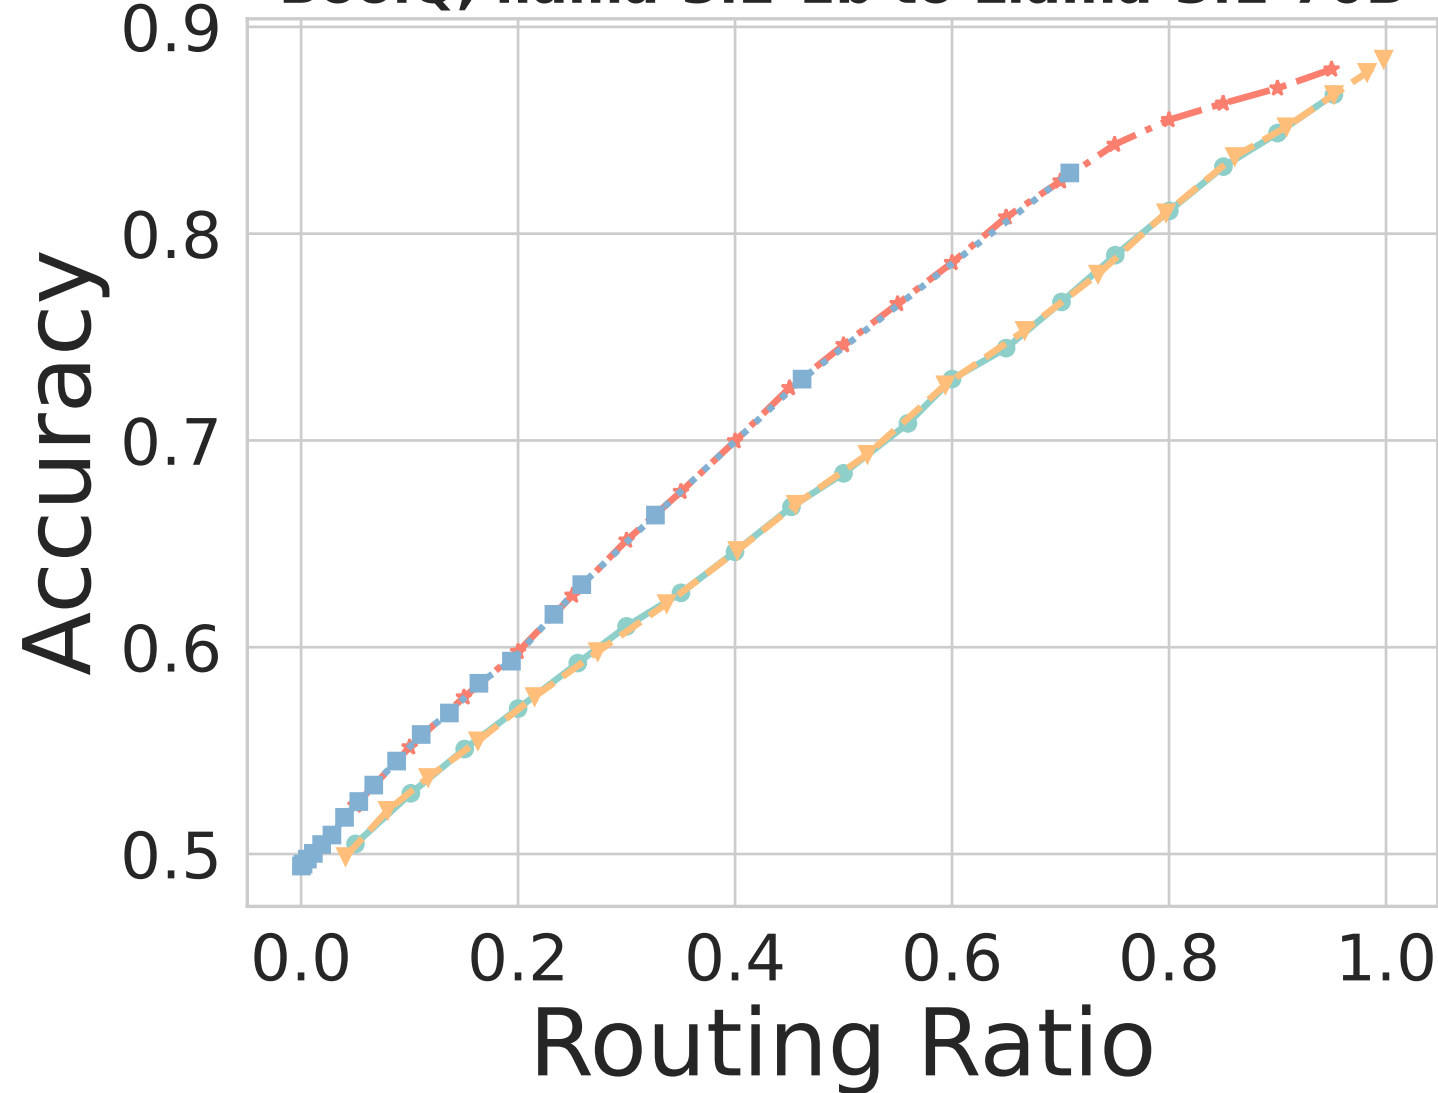

Supplement: supplementary_material [file cali_down_boolq_llama-3.2-1b_meta-llama_Llama-3.1-70B-Instruct.pdf › Routing_SLM_LLMs/Proxy_routing_prediction/to_meta-llama_Llama-3.1-70B-Instruct/boolq_as_downstream/cali_down_boolq_llama-3.2-1b_meta-llama_Llama-3.1-70B-Instruct.pdf]

**BoolQ, llama-3.2-3b to Llama-3.1-70B**

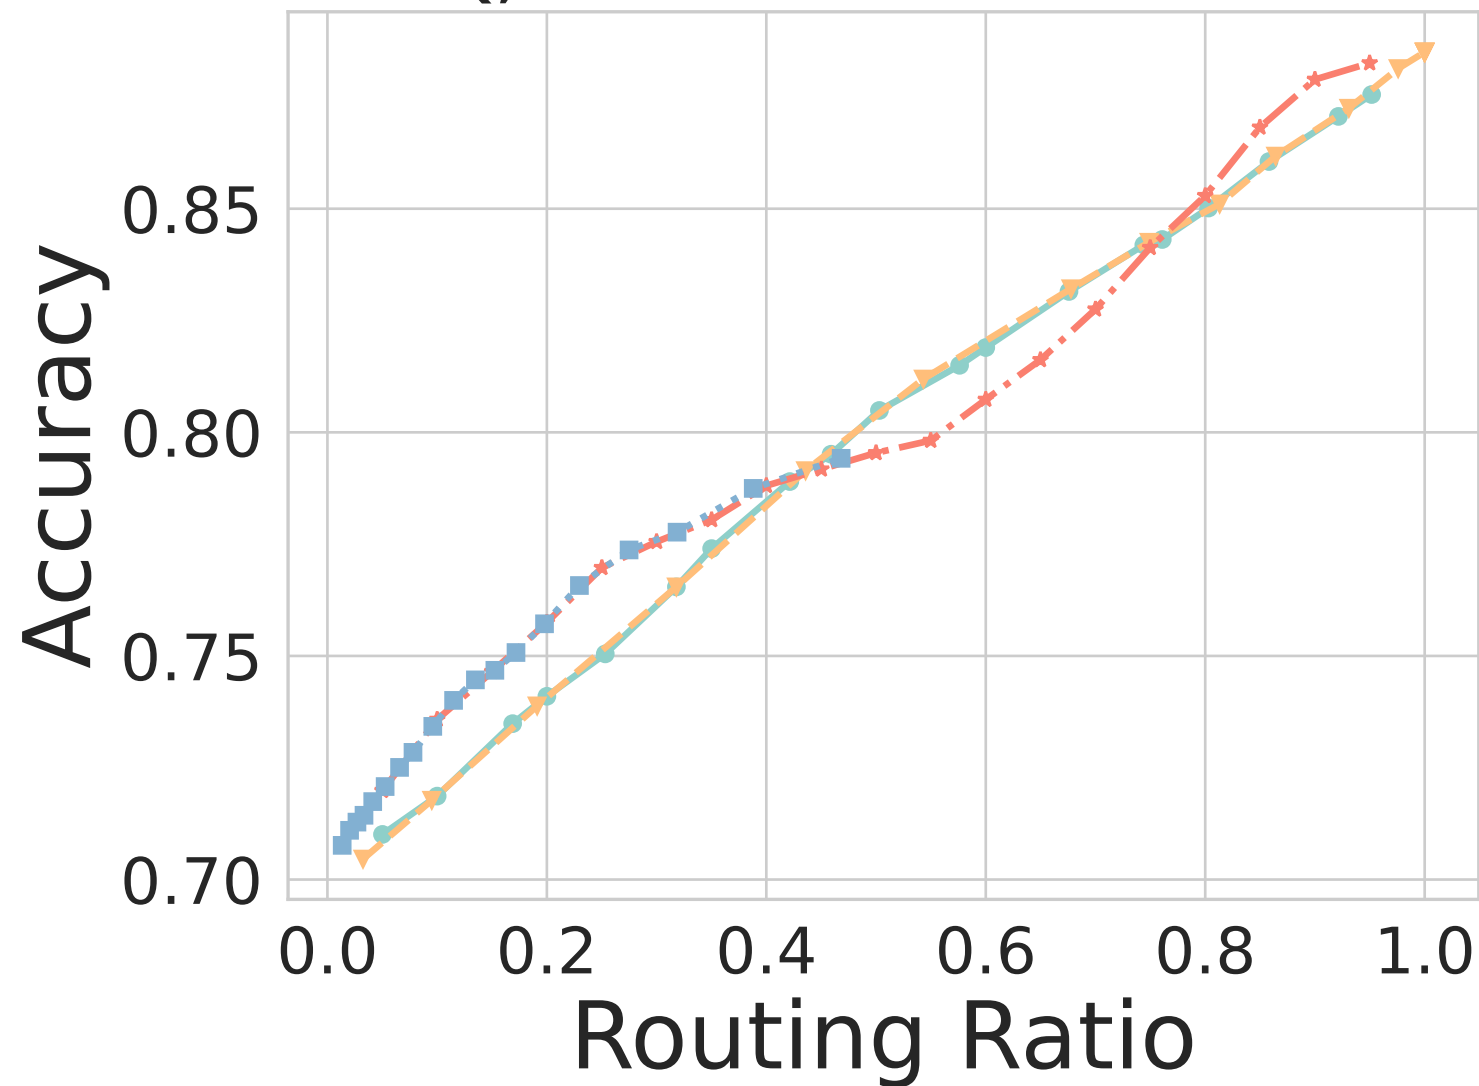

Supplement: supplementary_material [file cali_down_boolq_llama-3.2-3b_meta-llama_Llama-3.1-70B-Instruct.pdf › Routing_SLM_LLMs/Proxy_routing_prediction/to_meta-llama_Llama-3.1-70B-Instruct/boolq_as_downstream/cali_down_boolq_llama-3.2-3b_meta-llama_Llama-3.1-70B-Instruct.pdf]

**BoolQ, mistral-7b to Llama-3.1-70B**

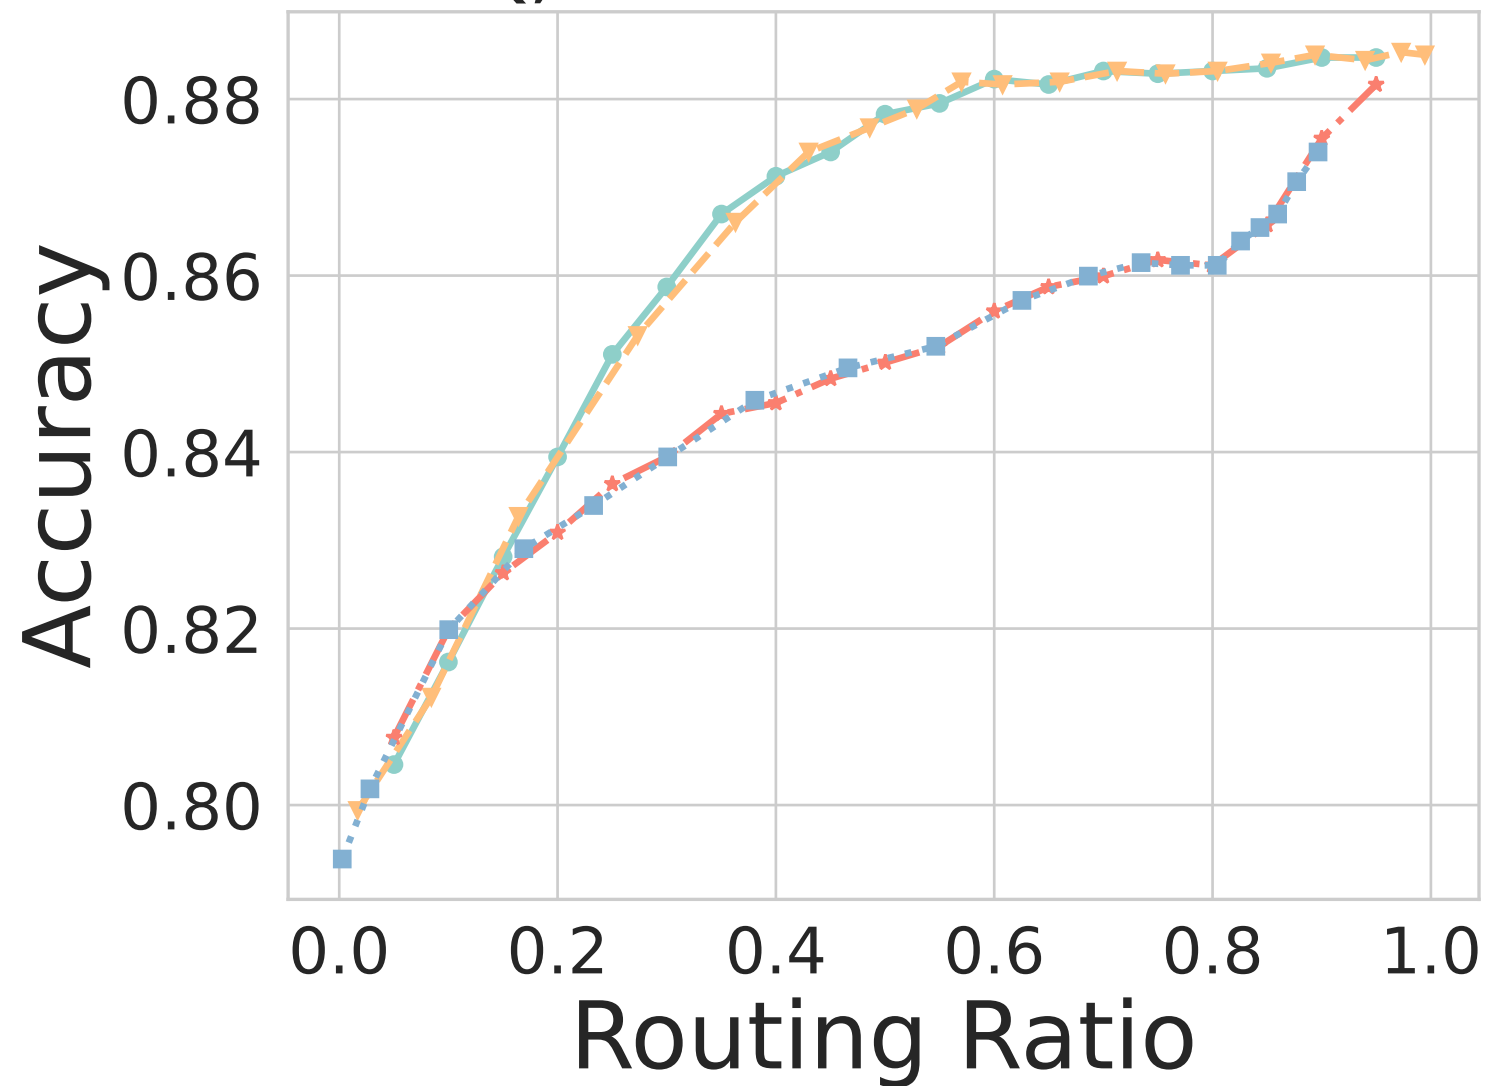

Supplement: supplementary_material [file cali_down_boolq_mistral-7b_meta-llama_Llama-3.1-70B-Instruct.pdf › Routing_SLM_LLMs/Proxy_routing_prediction/to_meta-llama_Llama-3.1-70B-Instruct/boolq_as_downstream/cali_down_boolq_mistral-7b_meta-llama_Llama-3.1-70B-Instruct.pdf]

**BoolQ, phi-3.5-mini to Llama-3.1-70B**

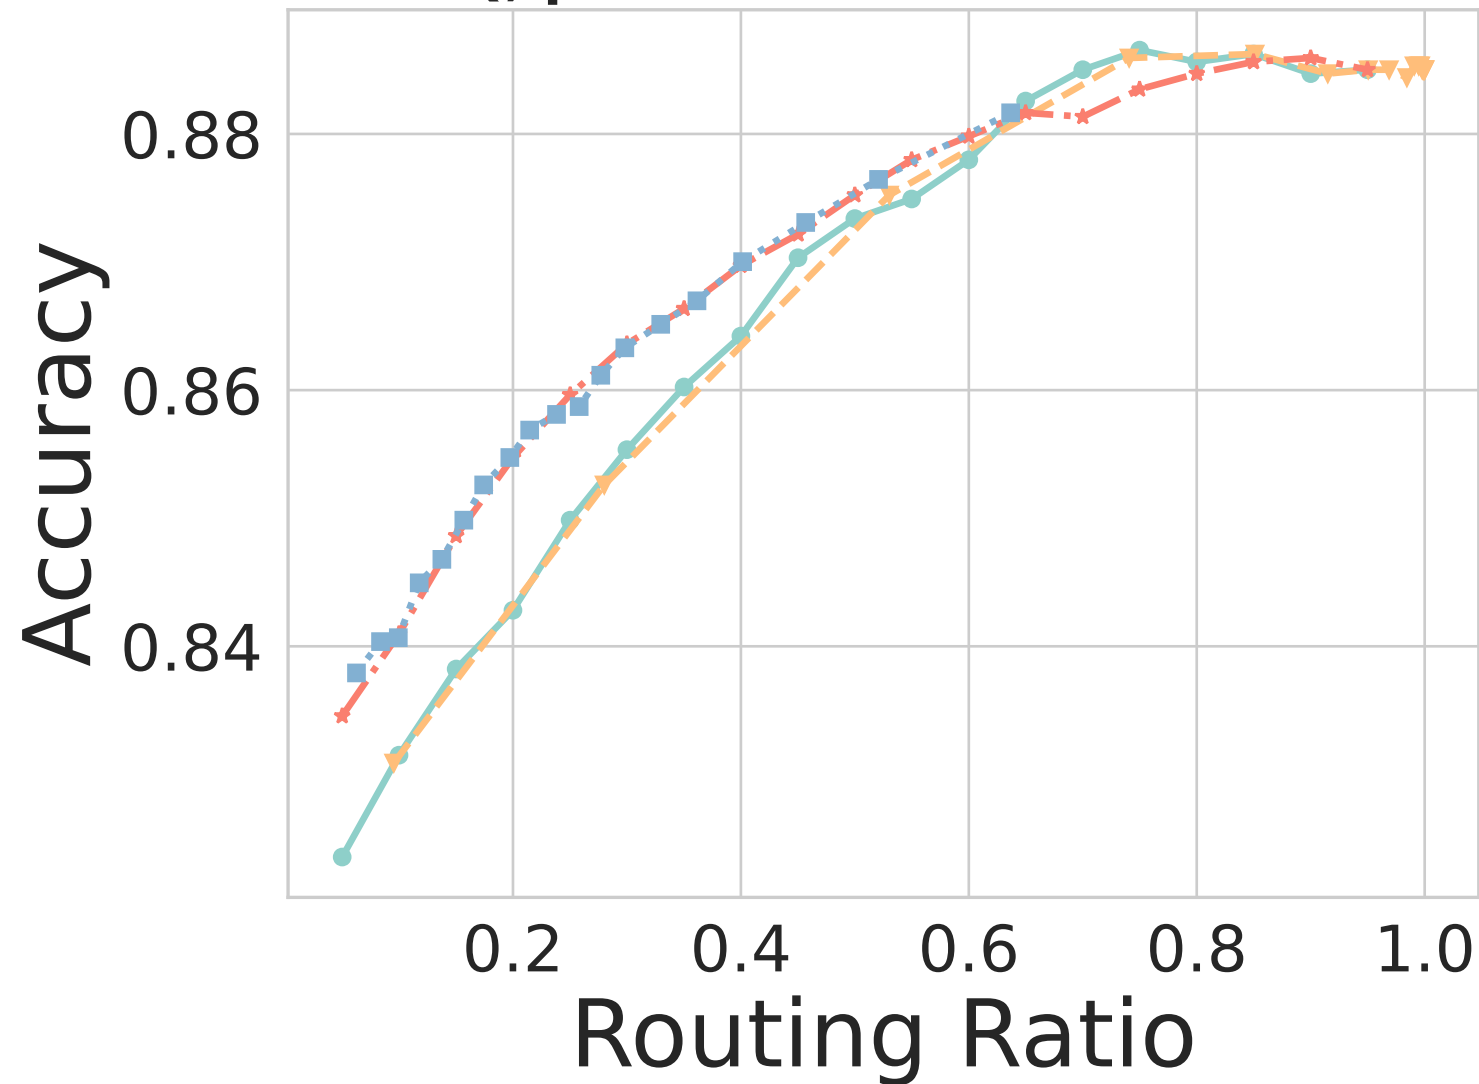

Supplement: supplementary_material [file cali_down_boolq_phi-3.5-mini_meta-llama_Llama-3.1-70B-Instruct.pdf › Routing_SLM_LLMs/Proxy_routing_prediction/to_meta-llama_Llama-3.1-70B-Instruct/boolq_as_downstream/cali_down_boolq_phi-3.5-mini_meta-llama_Llama-3.1-70B-Instruct.pdf]

**BoolQ, phi-4-mini-reasoning to Llama-3.1-70B**

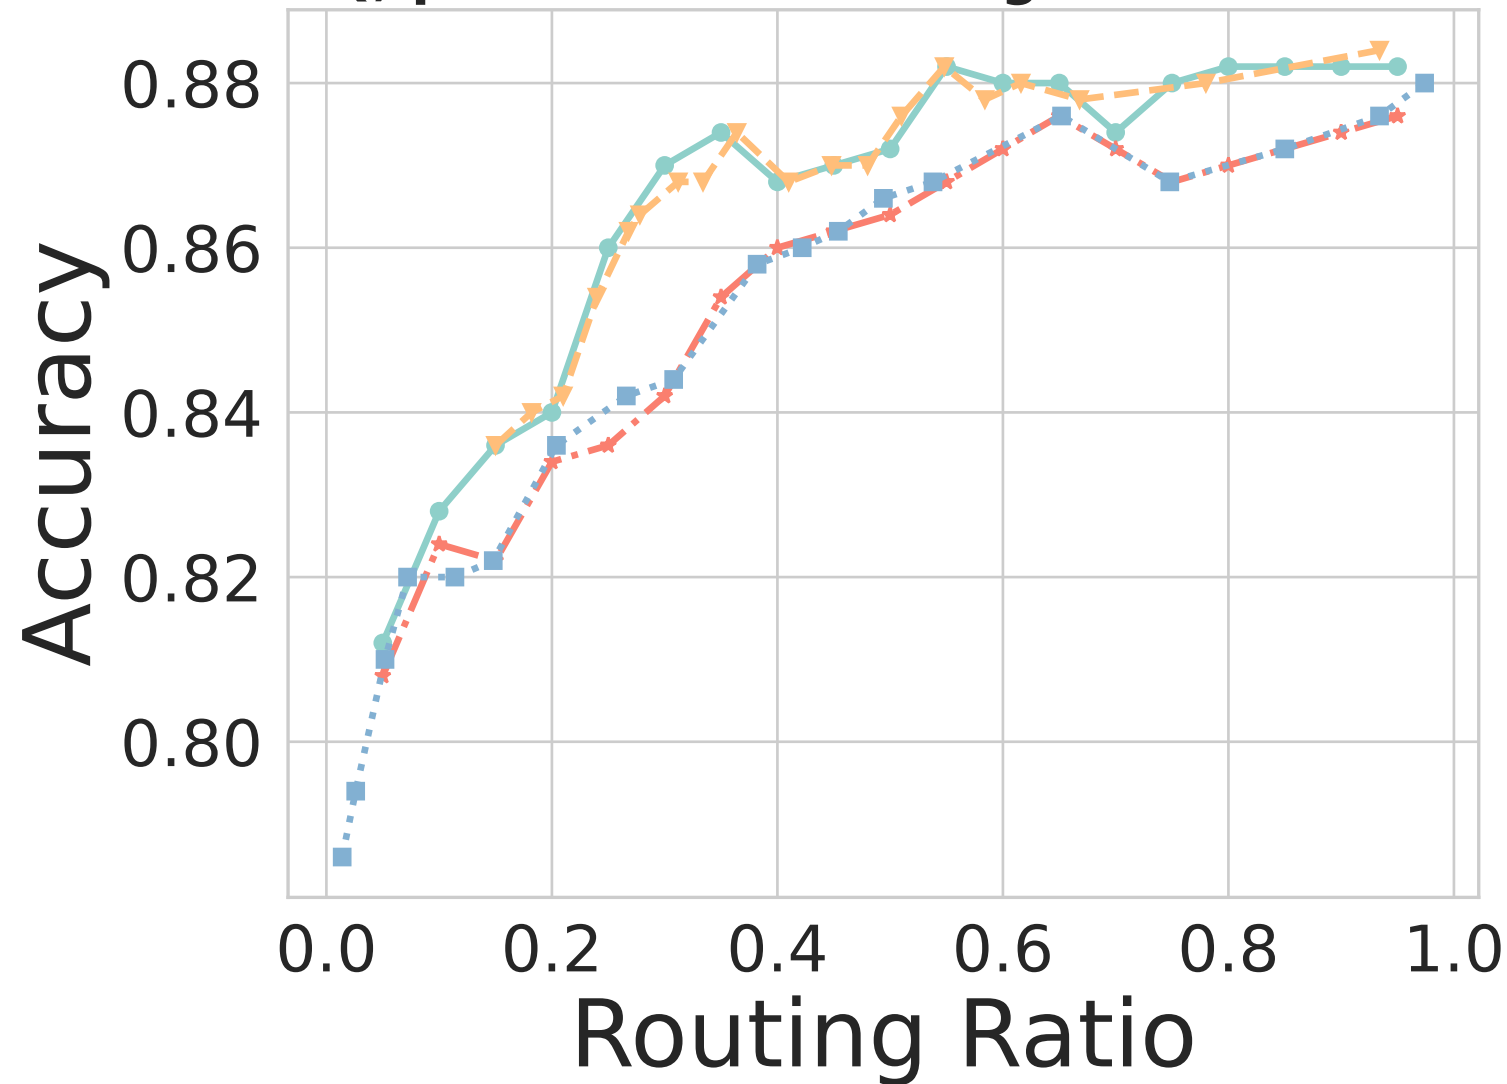

Supplement: supplementary_material [file cali_down_boolq_phi-4-mini-reasoning_meta-llama_Llama-3.1-70B-Instruct.pdf › Routing_SLM_LLMs/Proxy_routing_prediction/to_meta-llama_Llama-3.1-70B-Instruct/boolq_as_downstream/cali_down_boolq_phi-4-mini-reasoning_meta-llama_Llama-3.1-70B-Instruct.pdf]

**BoolQ, qwen-2.5-7b to Llama-3.1-70B**

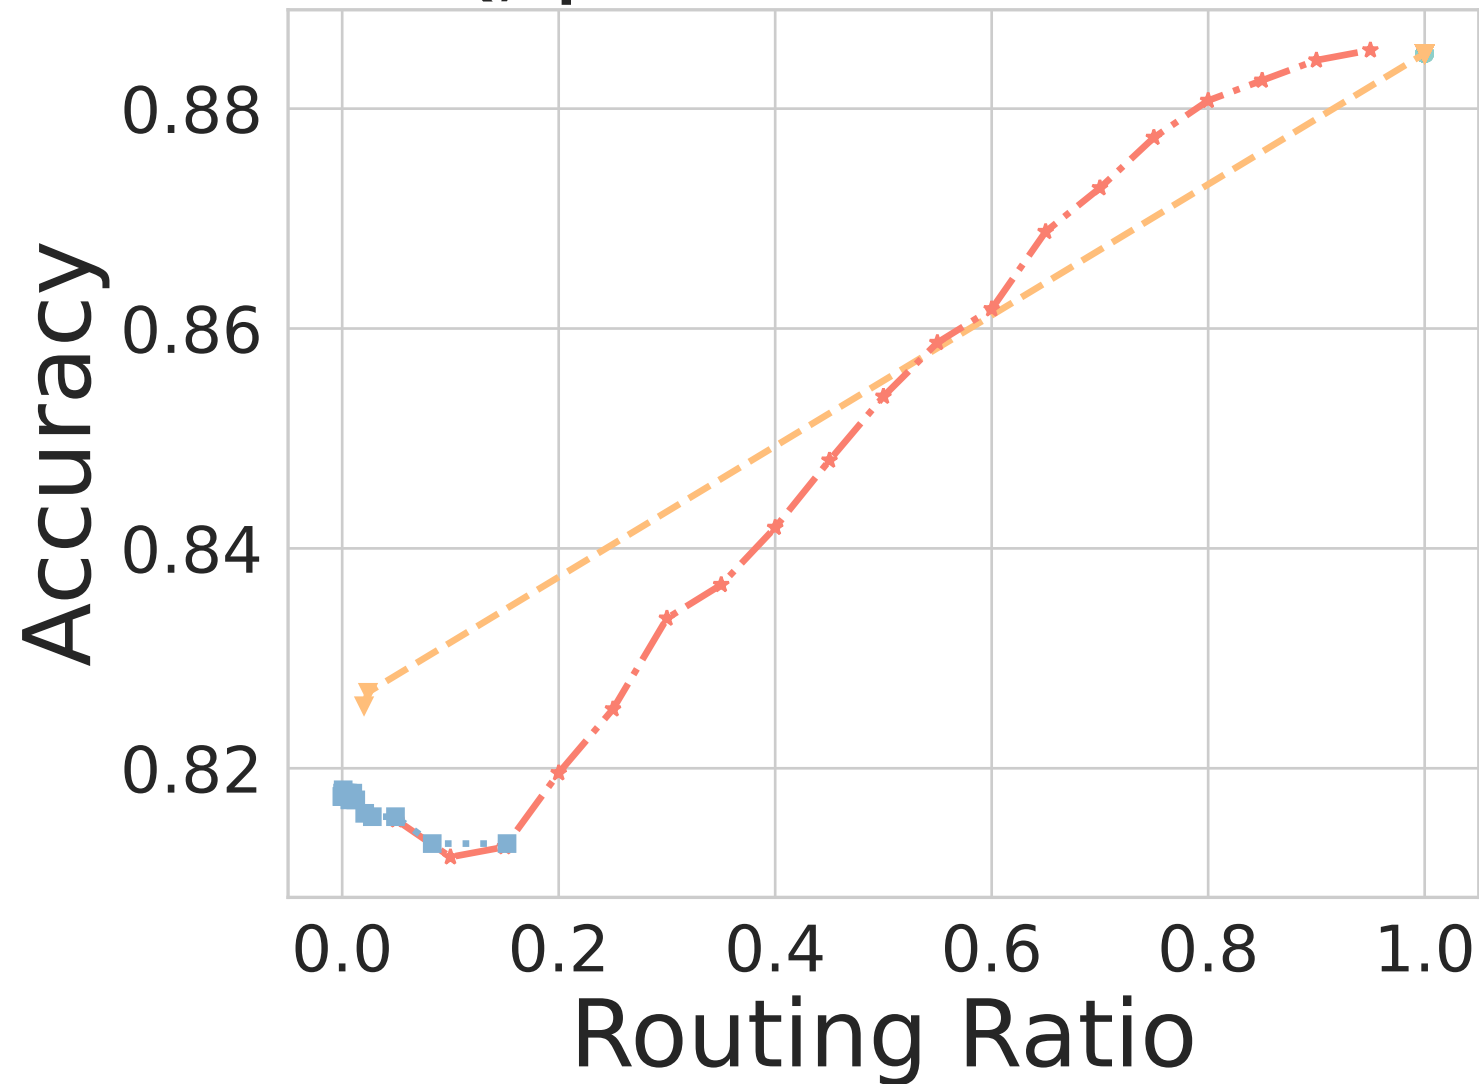

Supplement: supplementary_material [file cali_down_boolq_qwen-2.5-7b_meta-llama_Llama-3.1-70B-Instruct.pdf › Routing_SLM_LLMs/Proxy_routing_prediction/to_meta-llama_Llama-3.1-70B-Instruct/boolq_as_downstream/cali_down_boolq_qwen-2.5-7b_meta-llama_Llama-3.1-70B-Instruct.pdf]

**BoolQ, rwkv to Llama-3.1-70B**

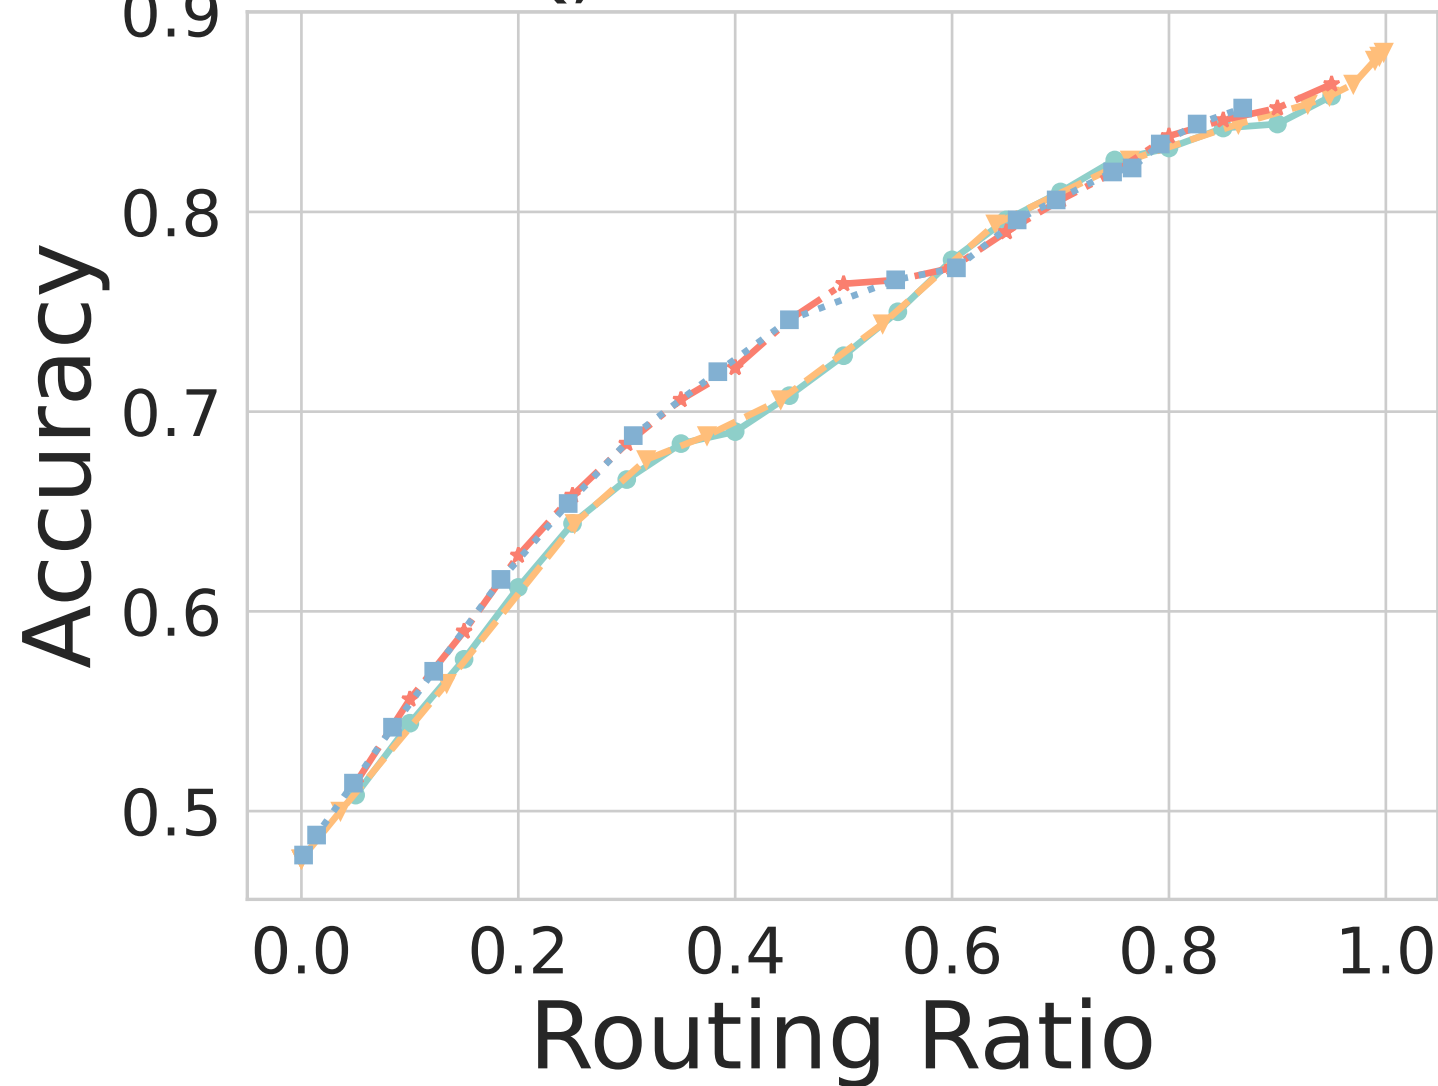

Supplement: supplementary_material [file cali_down_boolq_rwkv_meta-llama_Llama-3.1-70B-Instruct.pdf › Routing_SLM_LLMs/Proxy_routing_prediction/to_meta-llama_Llama-3.1-70B-Instruct/boolq_as_downstream/cali_down_boolq_rwkv_meta-llama_Llama-3.1-70B-Instruct.pdf]

**CoQA, Qwen3-0.6B to Llama-3.1-70B**

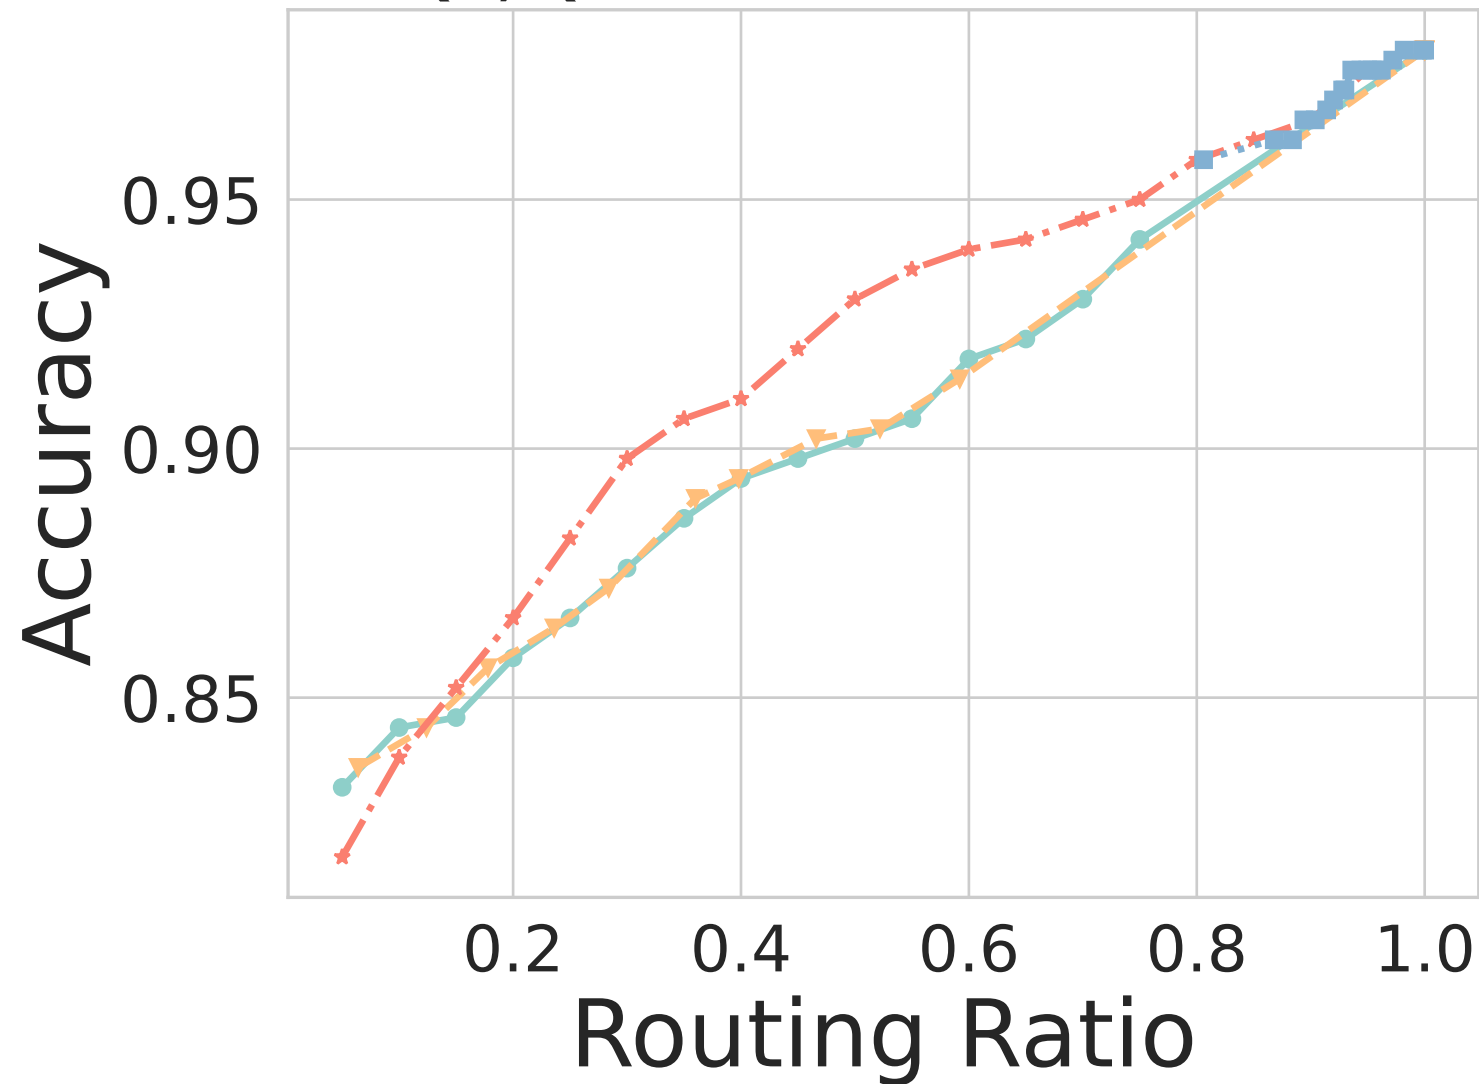

Supplement: supplementary_material [file cali_down_co_qa_Qwen3-0.6B_meta-llama_Llama-3.1-70B-Instruct.pdf › Routing_SLM_LLMs/Proxy_routing_prediction/to_meta-llama_Llama-3.1-70B-Instruct/co_qa_as_downstream/cali_down_co_qa_Qwen3-0.6B_meta-llama_Llama-3.1-70B-Instruct.pdf]

CoQA, Qwen3-1.7B to Llama-3.1-70B

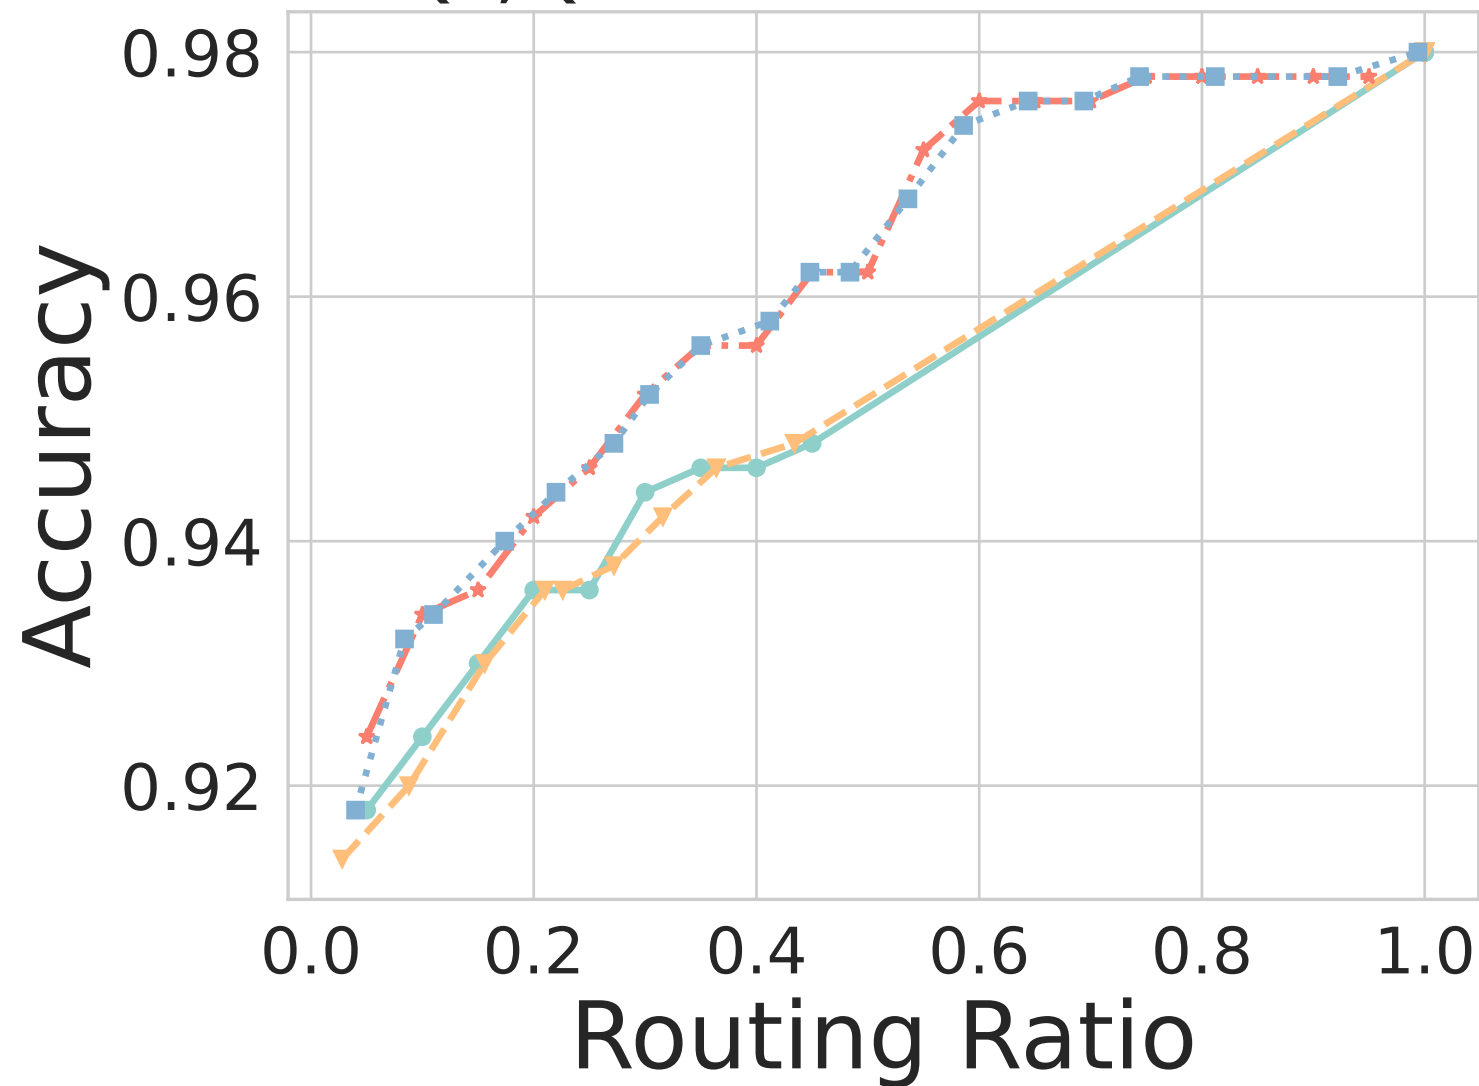

Supplement: supplementary_material [file cali_down_co_qa_Qwen3-1.7B_meta-llama_Llama-3.1-70B-Instruct.pdf › Routing_SLM_LLMs/Proxy_routing_prediction/to_meta-llama_Llama-3.1-70B-Instruct/co_qa_as_downstream/cali_down_co_qa_Qwen3-1.7B_meta-llama_Llama-3.1-70B-Instruct.pdf]

**CoQA, Qwen3-4B to Llama-3.1-70B**

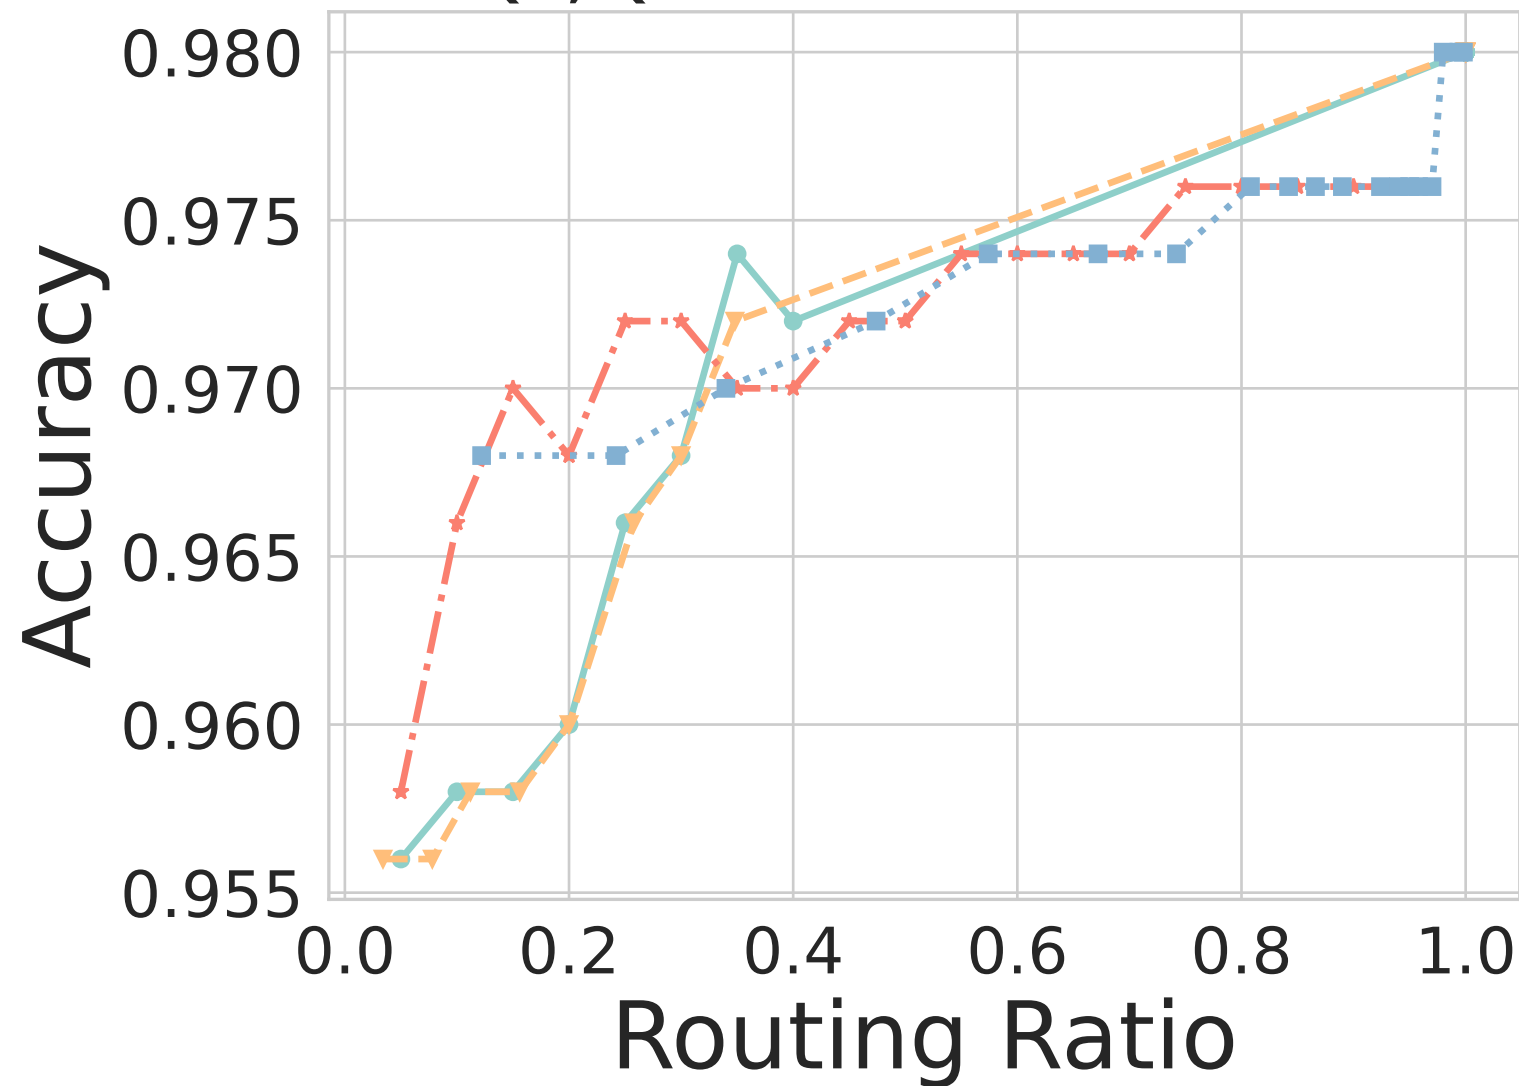

Supplement: supplementary_material [file cali_down_co_qa_Qwen3-4B_meta-llama_Llama-3.1-70B-Instruct.pdf › Routing_SLM_LLMs/Proxy_routing_prediction/to_meta-llama_Llama-3.1-70B-Instruct/co_qa_as_downstream/cali_down_co_qa_Qwen3-4B_meta-llama_Llama-3.1-70B-Instruct.pdf]

**CoQA, granite-3.1-8b to Llama-3.1-70B**

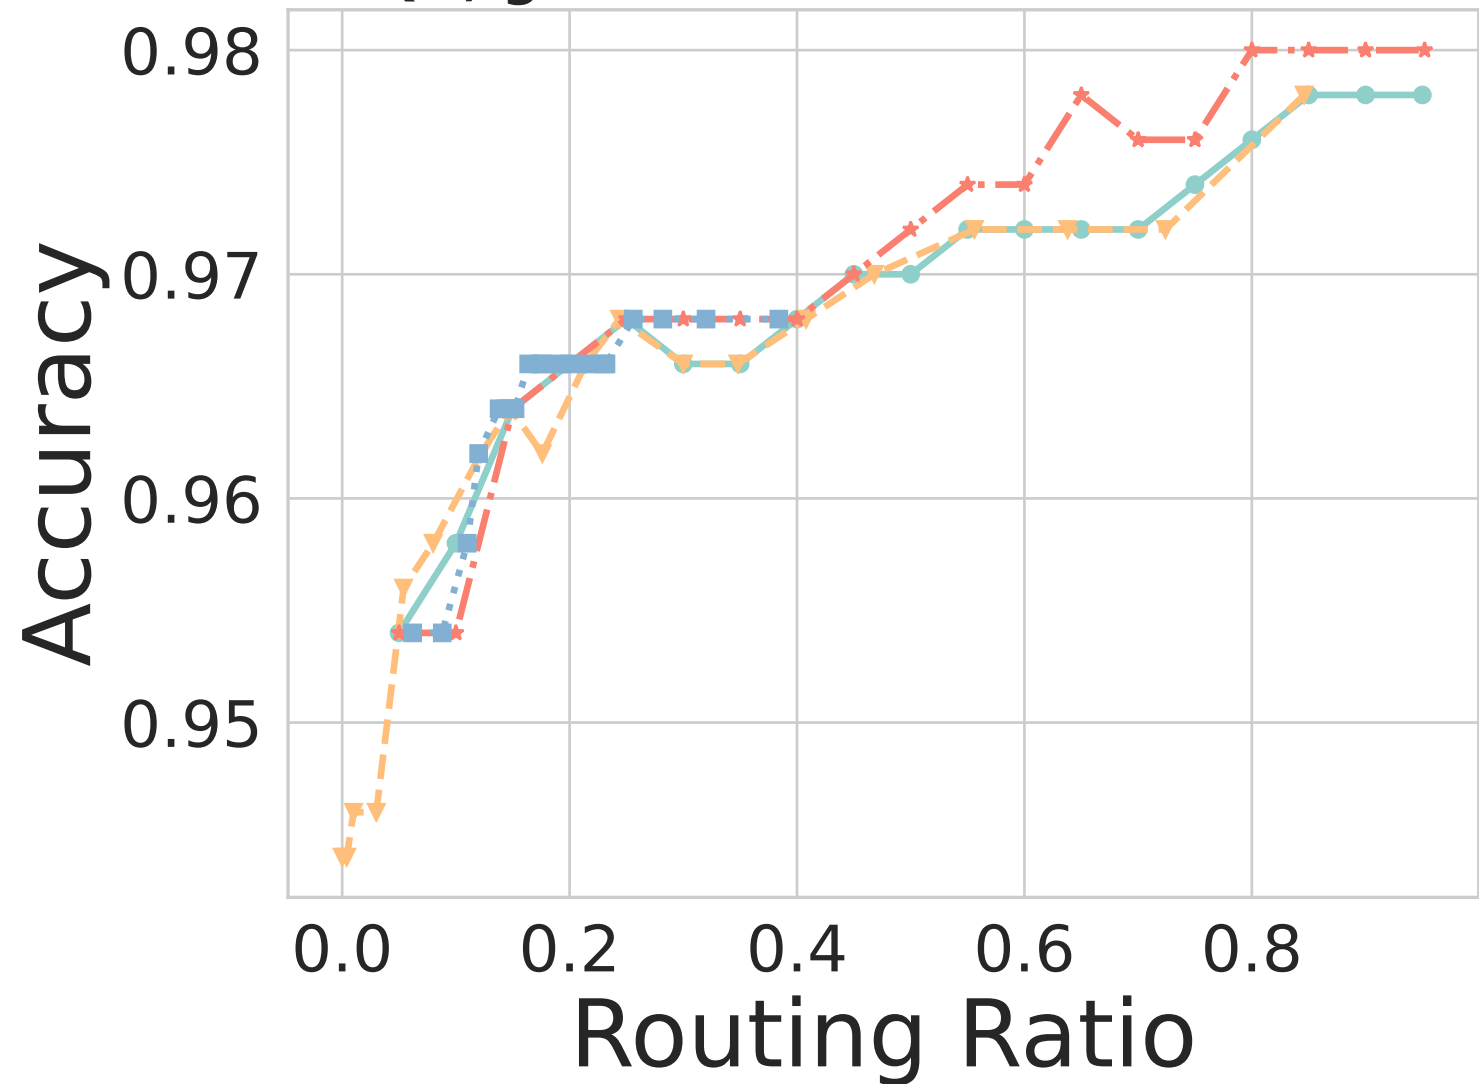

Supplement: supplementary_material [file cali_down_co_qa_granite-3.1-8b_meta-llama_Llama-3.1-70B-Instruct.pdf › Routing_SLM_LLMs/Proxy_routing_prediction/to_meta-llama_Llama-3.1-70B-Instruct/co_qa_as_downstream/cali_down_co_qa_granite-3.1-8b_meta-llama_Llama-3.1-70B-Instruct.pdf]

**CoQA, llama-3.1-8b to Llama-3.1-70B**

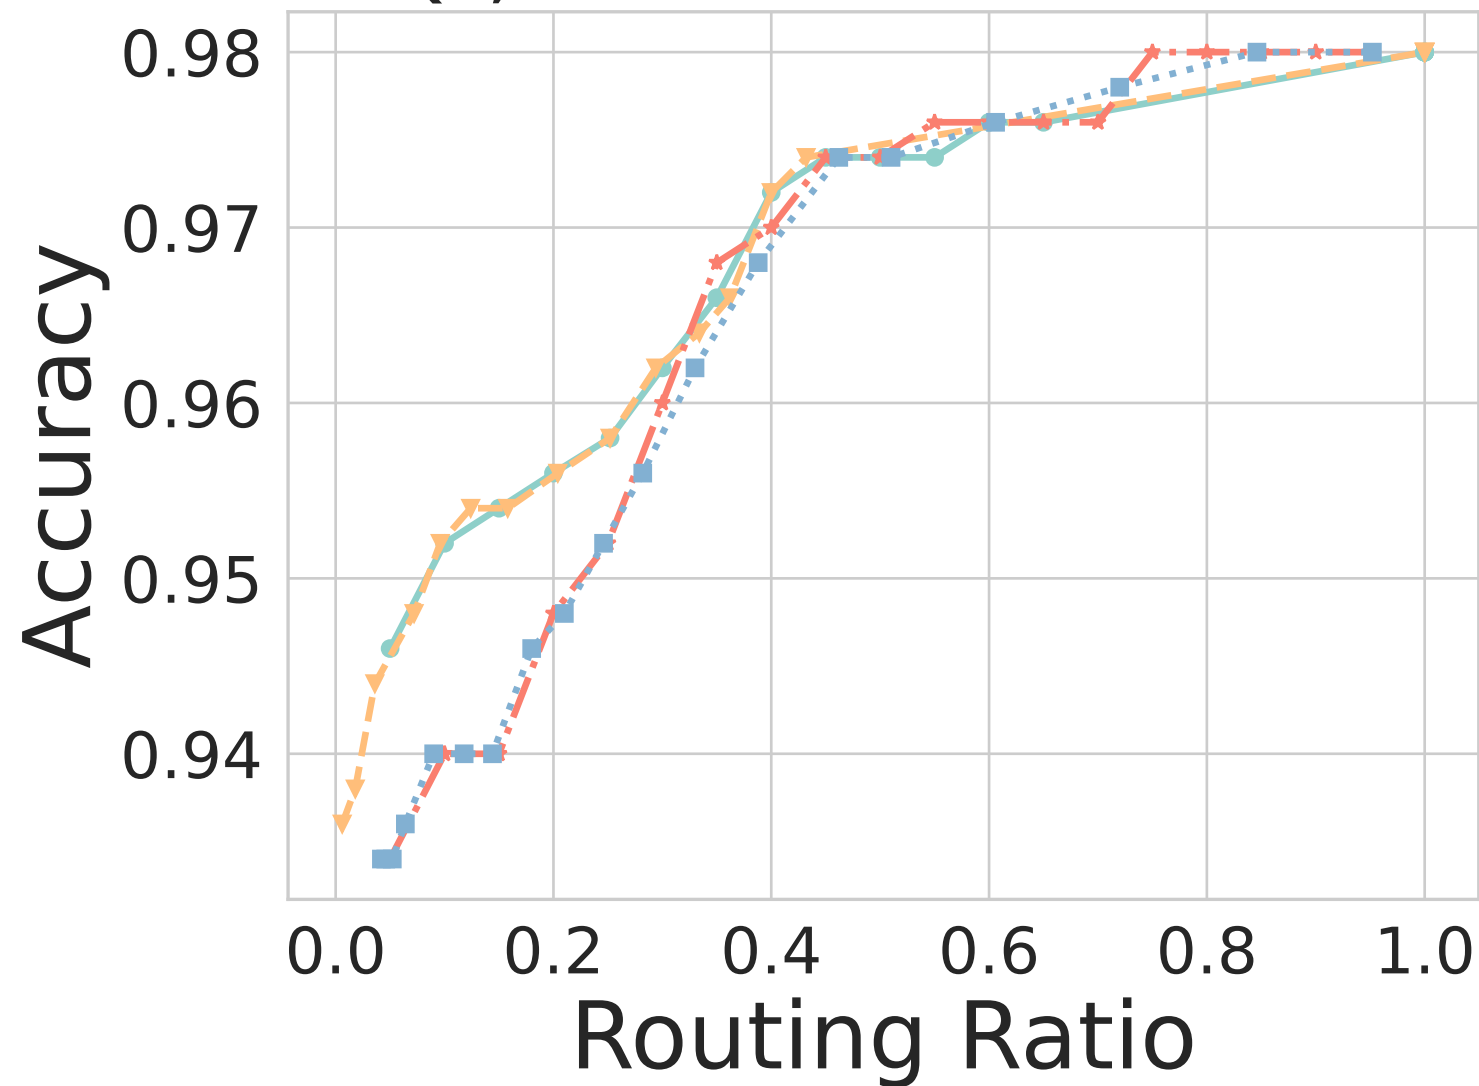

Supplement: supplementary_material [file cali_down_co_qa_llama-3.1-8b_meta-llama_Llama-3.1-70B-Instruct.pdf › Routing_SLM_LLMs/Proxy_routing_prediction/to_meta-llama_Llama-3.1-70B-Instruct/co_qa_as_downstream/cali_down_co_qa_llama-3.1-8b_meta-llama_Llama-3.1-70B-Instruct.pdf]

**CoQA, llama-3.2-1b to Llama-3.1-70B**

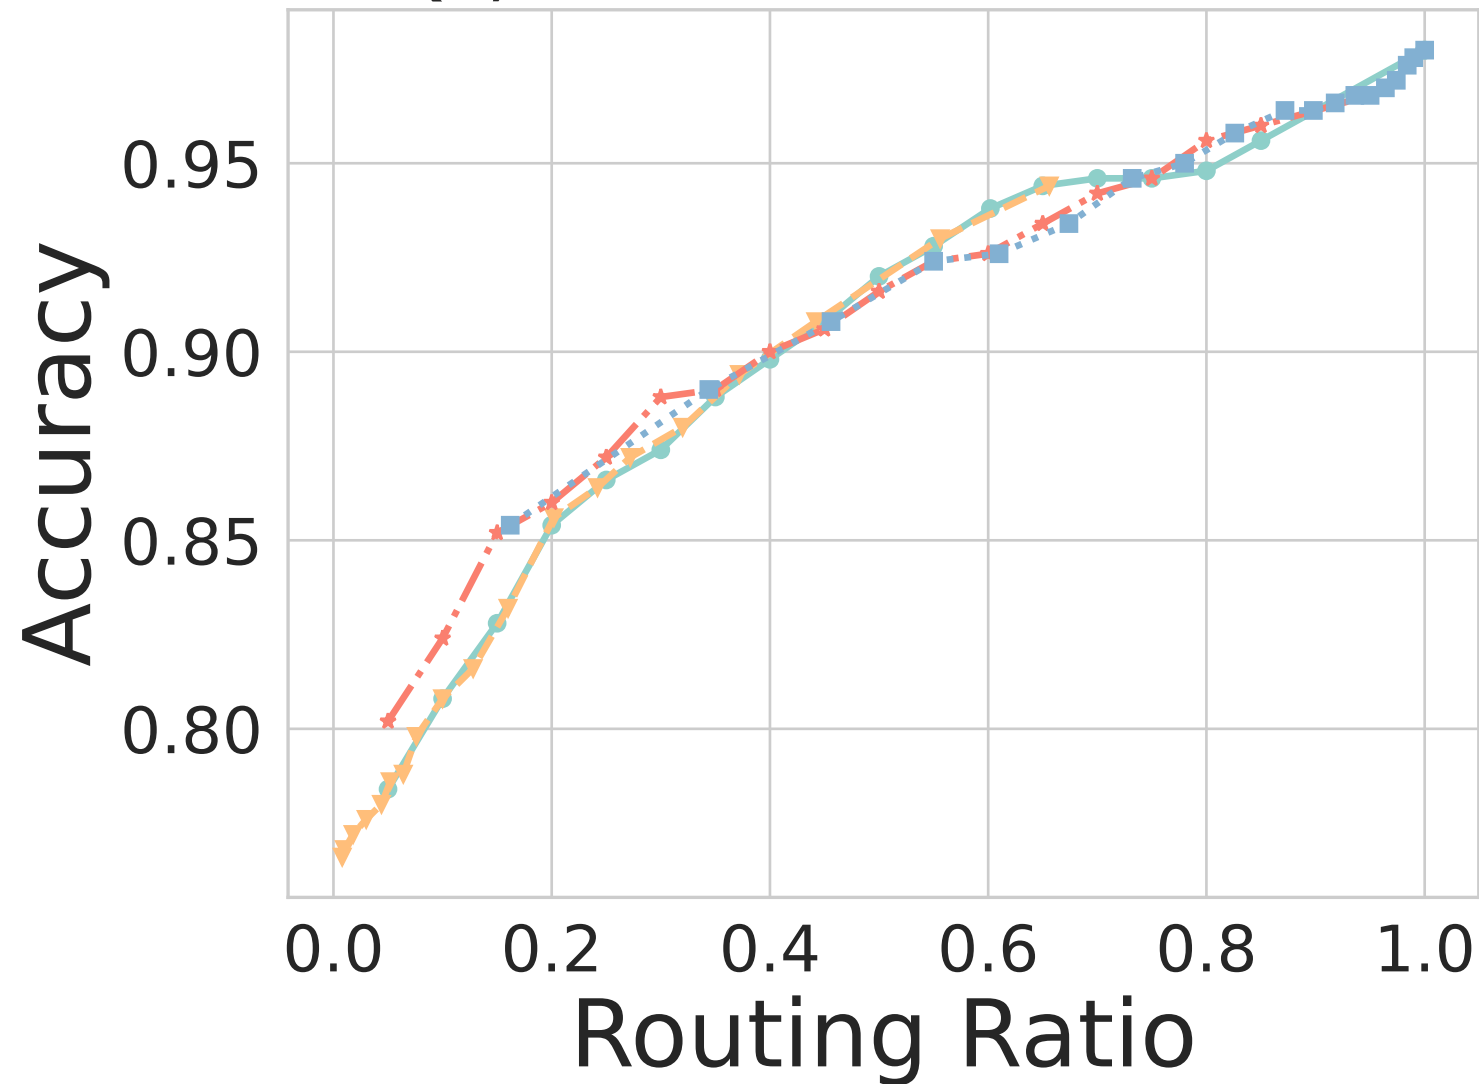

Supplement: supplementary_material [file cali_down_co_qa_llama-3.2-1b_meta-llama_Llama-3.1-70B-Instruct.pdf › Routing_SLM_LLMs/Proxy_routing_prediction/to_meta-llama_Llama-3.1-70B-Instruct/co_qa_as_downstream/cali_down_co_qa_llama-3.2-1b_meta-llama_Llama-3.1-70B-Instruct.pdf]

**CoQA, llama-3.2-3b to Llama-3.1-70B**

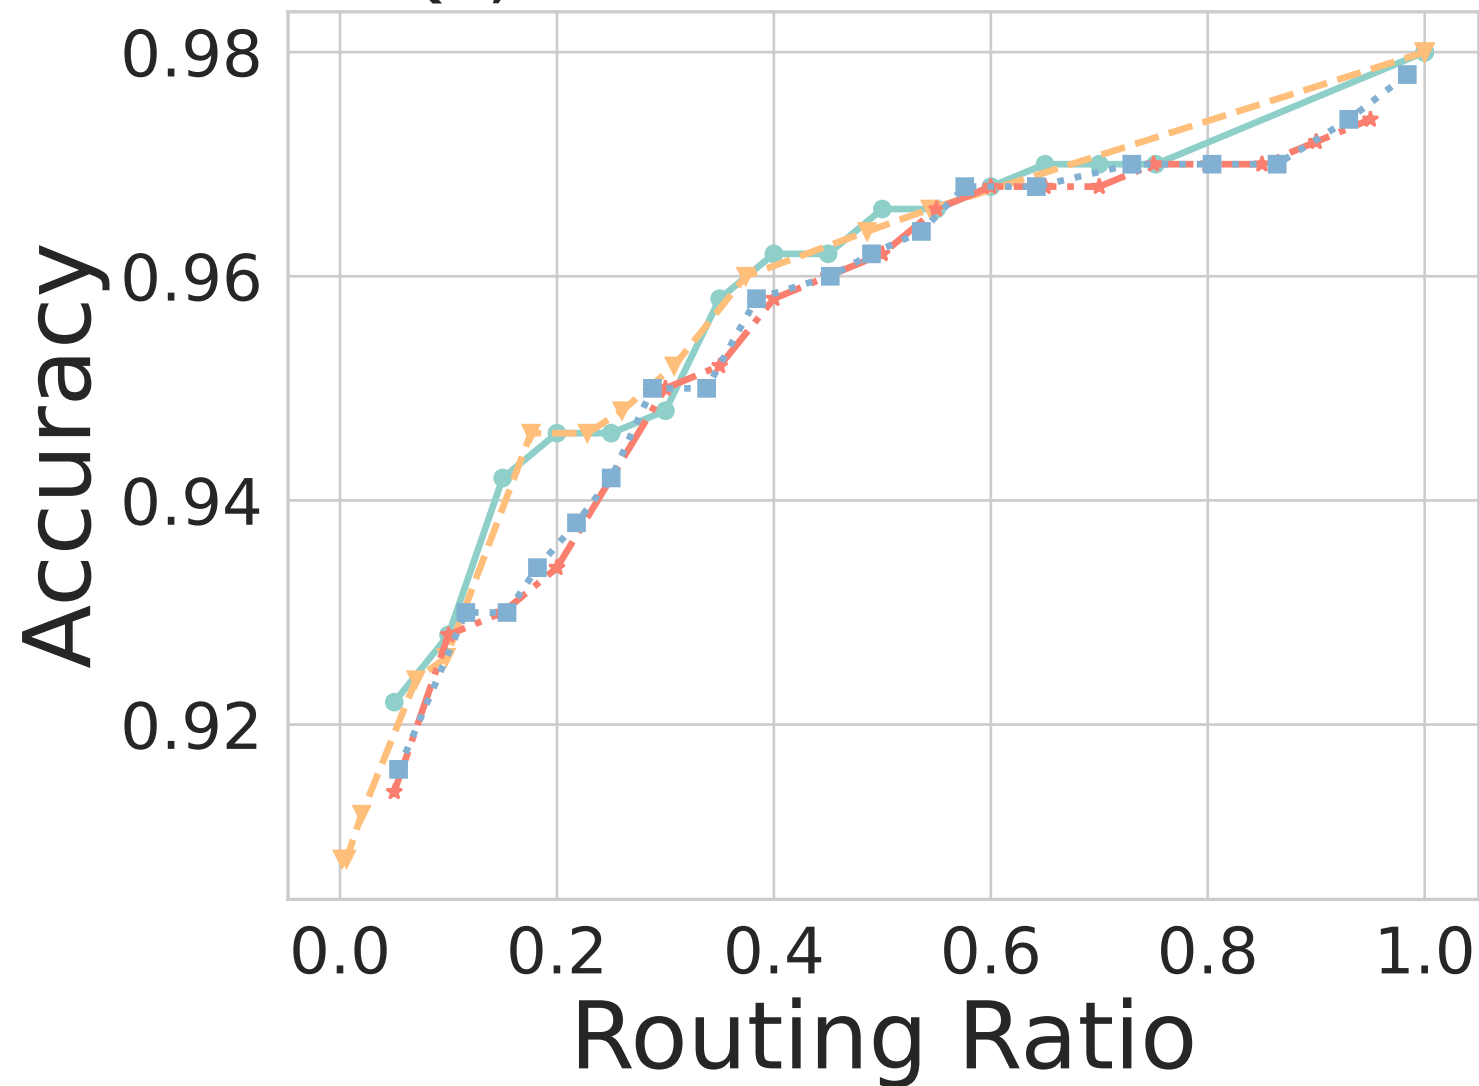

Supplement: supplementary_material [file cali_down_co_qa_llama-3.2-3b_meta-llama_Llama-3.1-70B-Instruct.pdf › Routing_SLM_LLMs/Proxy_routing_prediction/to_meta-llama_Llama-3.1-70B-Instruct/co_qa_as_downstream/cali_down_co_qa_llama-3.2-3b_meta-llama_Llama-3.1-70B-Instruct.pdf]

**CoQA, mistral-7b to Llama-3.1-70B**

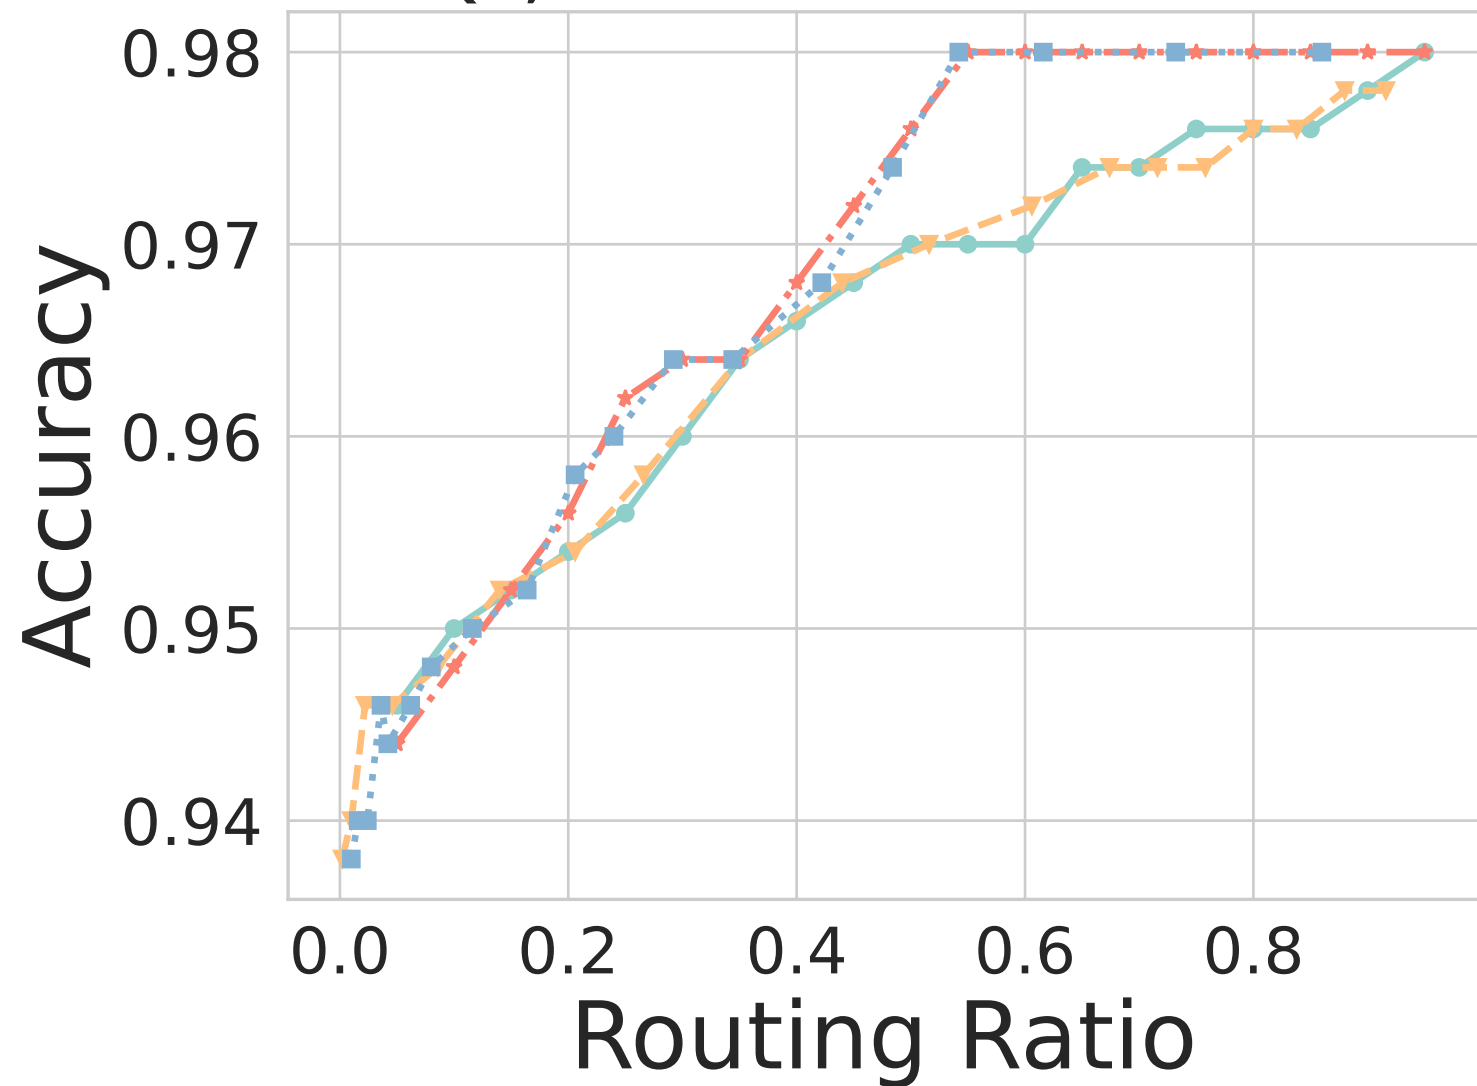

Supplement: supplementary_material [file cali_down_co_qa_mistral-7b_meta-llama_Llama-3.1-70B-Instruct.pdf › Routing_SLM_LLMs/Proxy_routing_prediction/to_meta-llama_Llama-3.1-70B-Instruct/co_qa_as_downstream/cali_down_co_qa_mistral-7b_meta-llama_Llama-3.1-70B-Instruct.pdf]

CoQA, phi-3.5-mini to Llama-3.1-70B

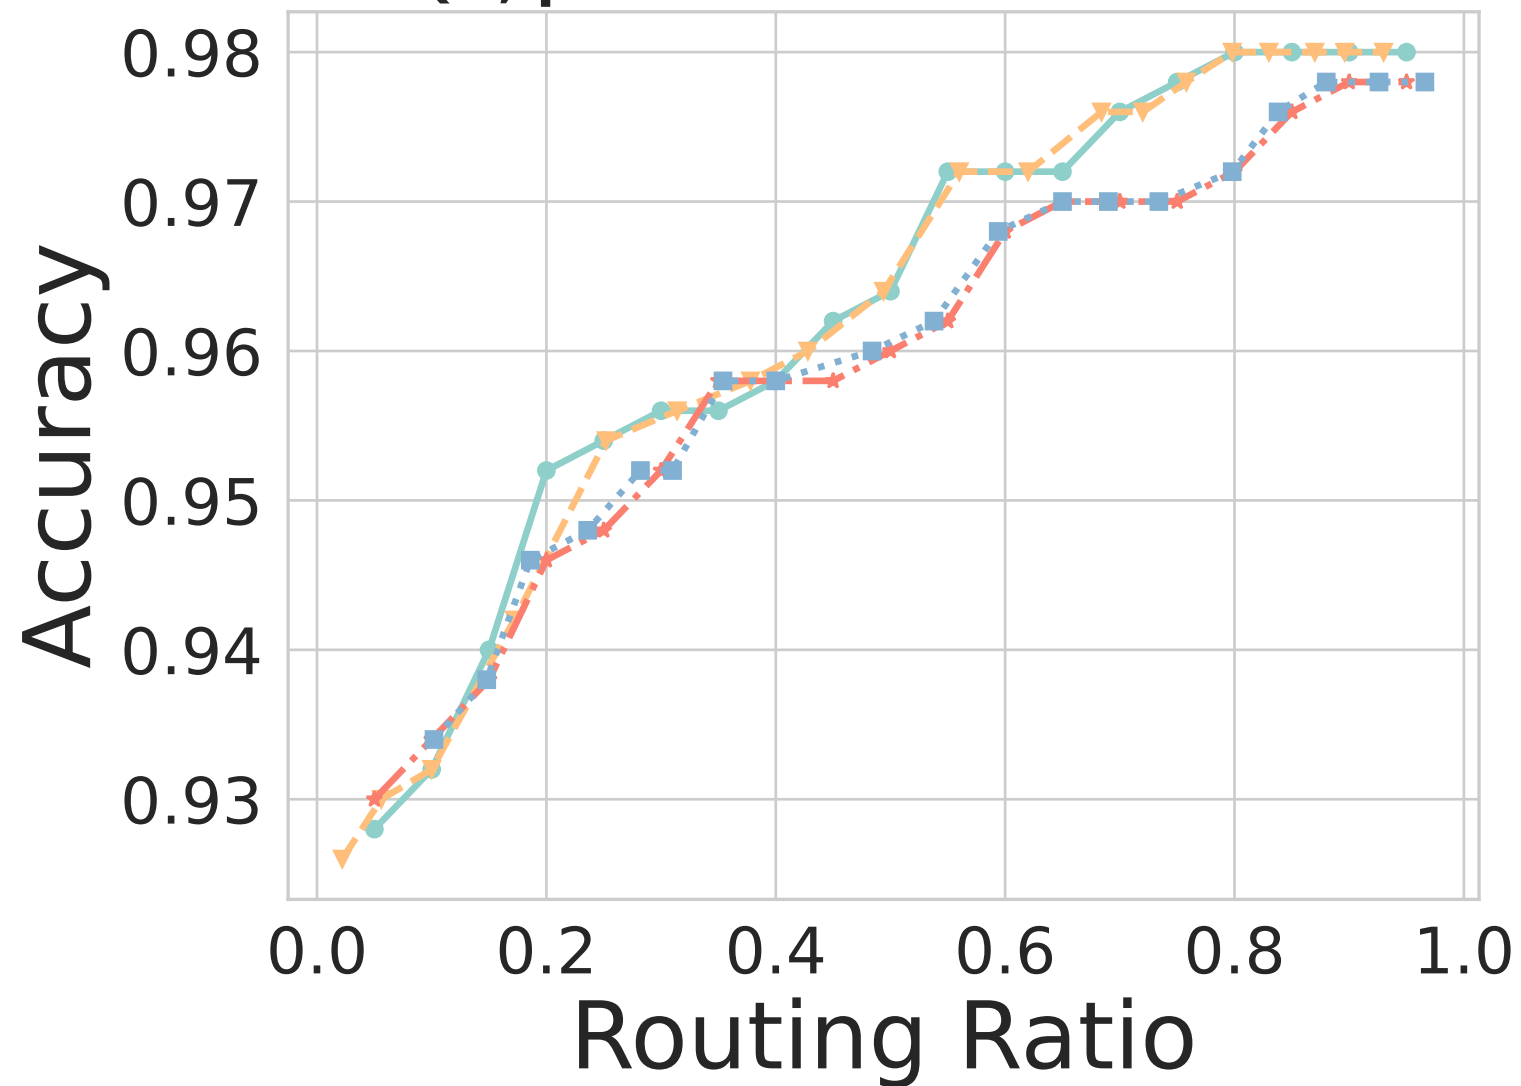

Supplement: supplementary_material [file cali_down_co_qa_phi-3.5-mini_meta-llama_Llama-3.1-70B-Instruct.pdf › Routing_SLM_LLMs/Proxy_routing_prediction/to_meta-llama_Llama-3.1-70B-Instruct/co_qa_as_downstream/cali_down_co_qa_phi-3.5-mini_meta-llama_Llama-3.1-70B-Instruct.pdf]

CoQA, phi-4-mini-reasoning to Llama-3.1-70B

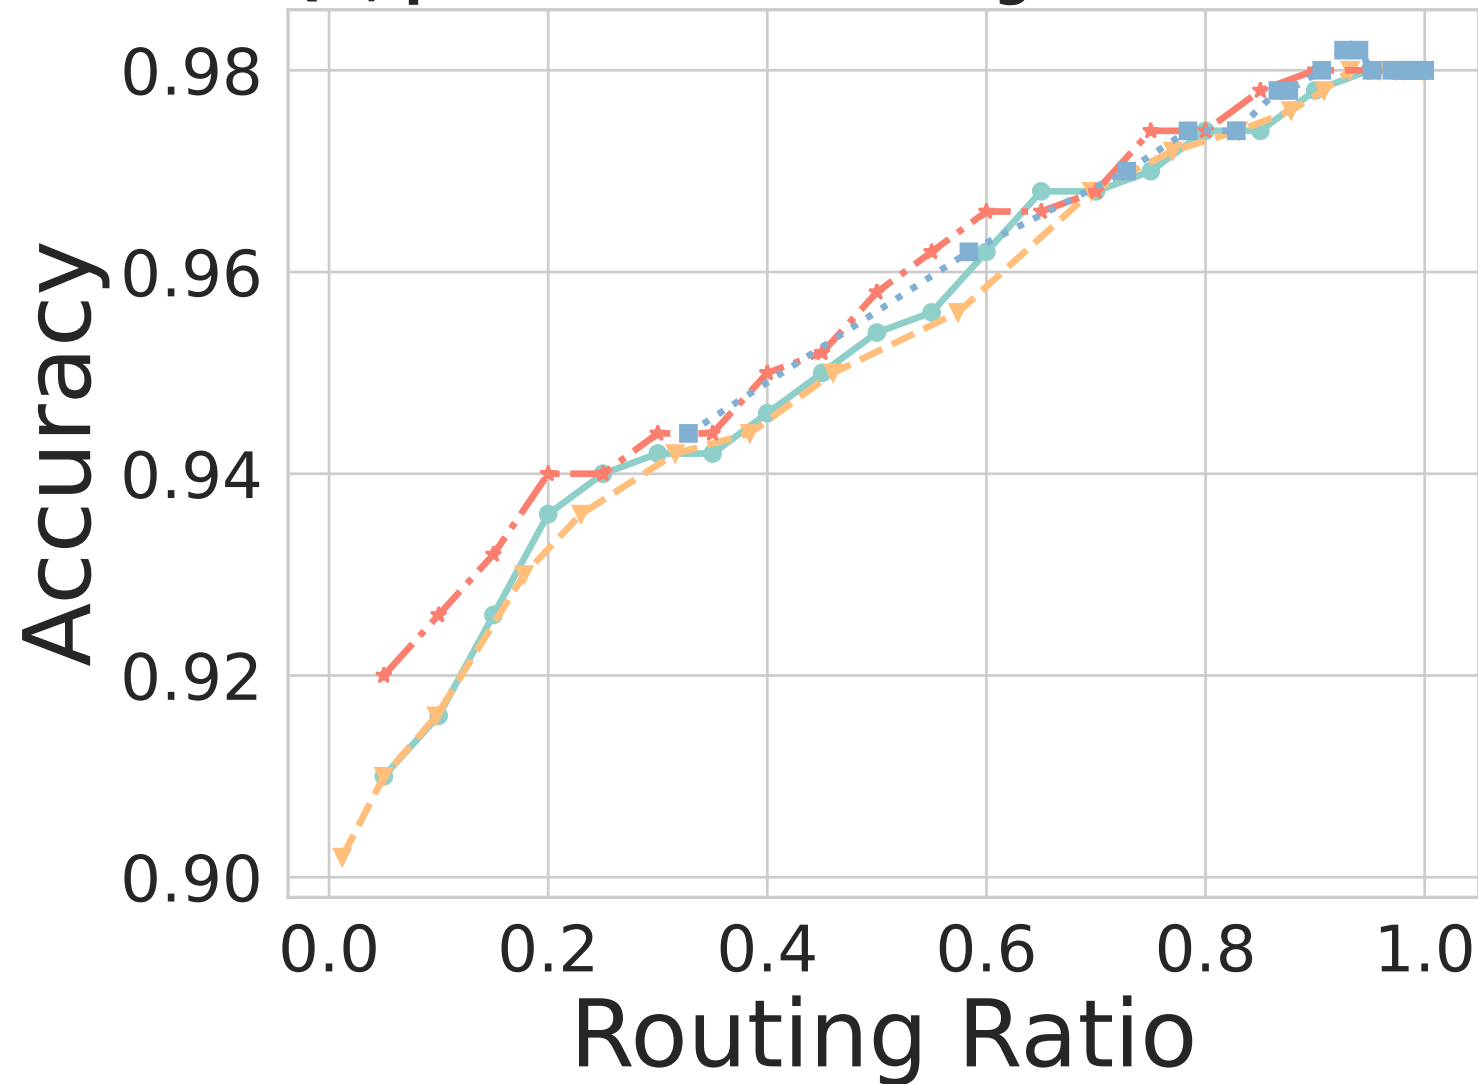

Supplement: supplementary_material [file cali_down_co_qa_phi-4-mini-reasoning_meta-llama_Llama-3.1-70B-Instruct.pdf › Routing_SLM_LLMs/Proxy_routing_prediction/to_meta-llama_Llama-3.1-70B-Instruct/co_qa_as_downstream/cali_down_co_qa_phi-4-mini-reasoning_meta-llama_Llama-3.1-70B-Instruct.pdf]

CoQA, qwen-2.5-7b to Llama-3.1-70B

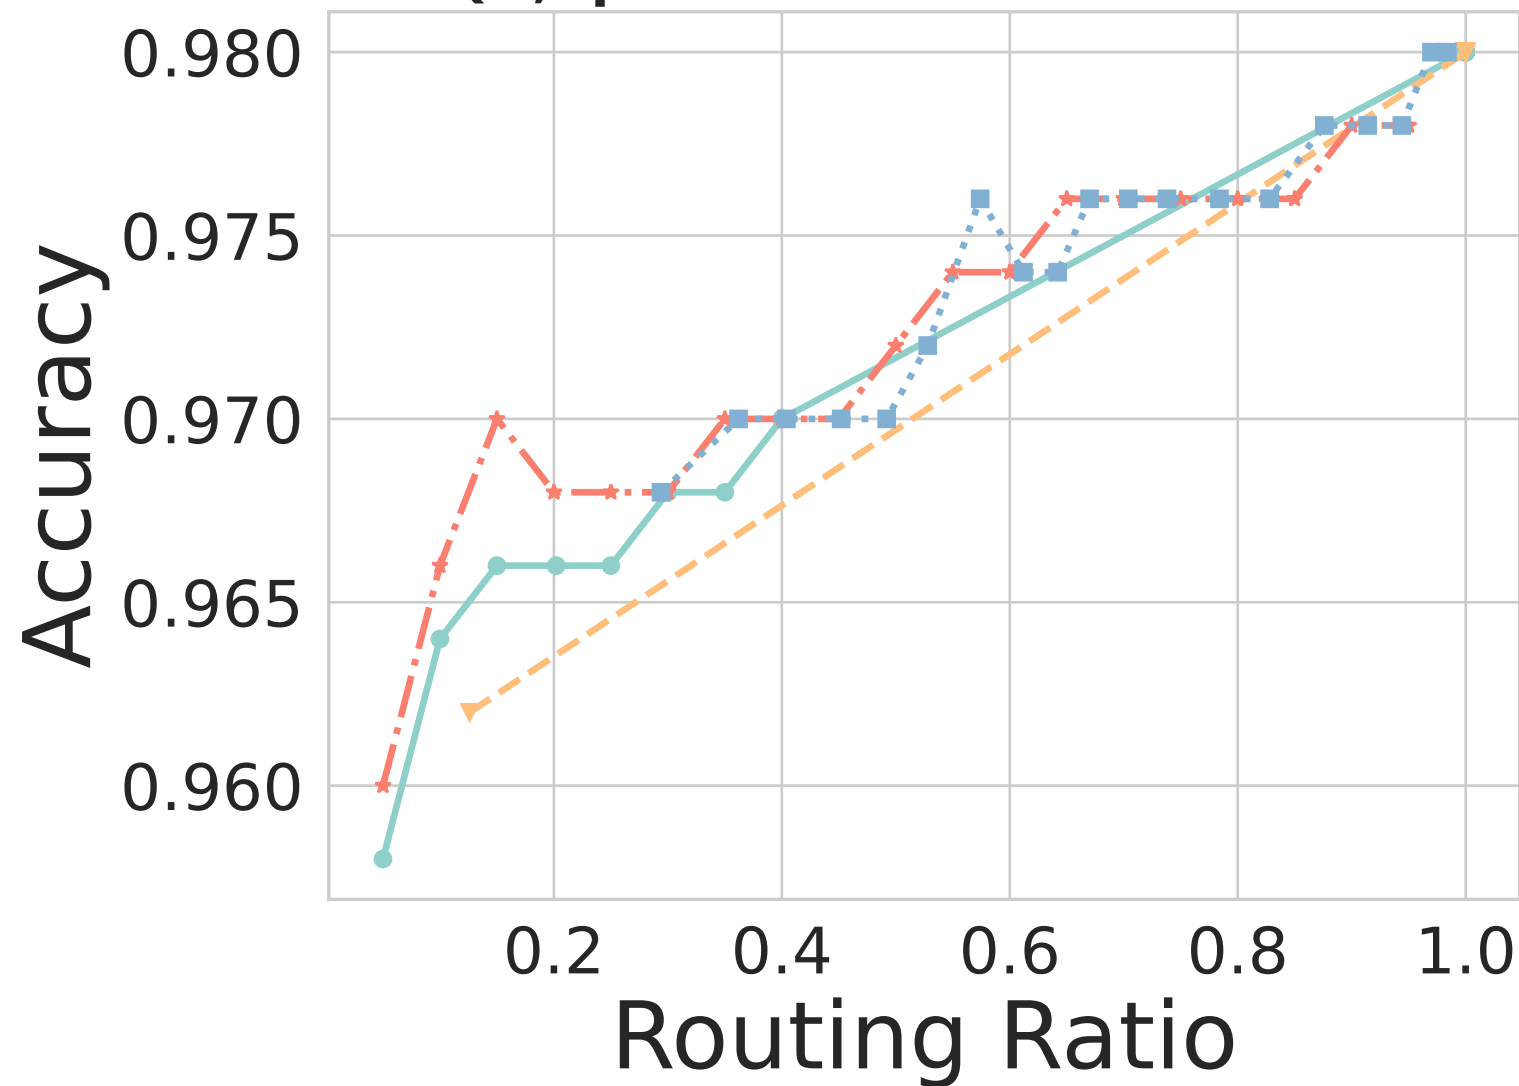

Supplement: supplementary_material [file cali_down_co_qa_qwen-2.5-7b_meta-llama_Llama-3.1-70B-Instruct.pdf › Routing_SLM_LLMs/Proxy_routing_prediction/to_meta-llama_Llama-3.1-70B-Instruct/co_qa_as_downstream/cali_down_co_qa_qwen-2.5-7b_meta-llama_Llama-3.1-70B-Instruct.pdf]

**CoQA, rwkv to Llama-3.1-70B**

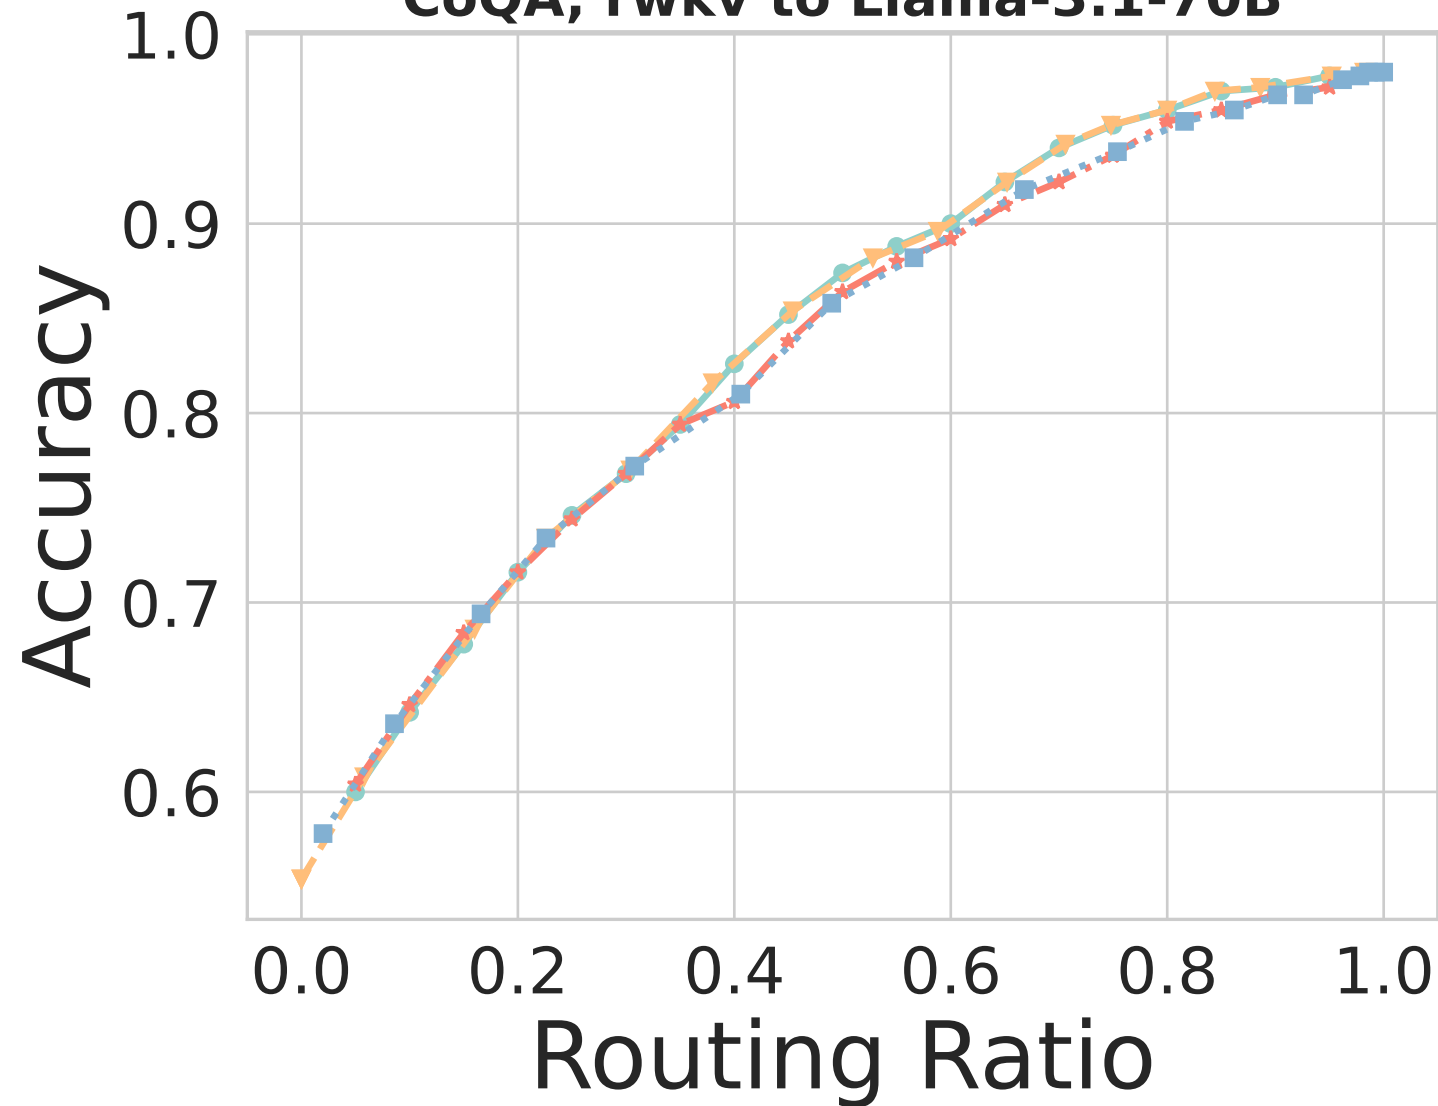

Supplement: supplementary_material [file cali_down_co_qa_rwkv_meta-llama_Llama-3.1-70B-Instruct.pdf › Routing_SLM_LLMs/Proxy_routing_prediction/to_meta-llama_Llama-3.1-70B-Instruct/co_qa_as_downstream/cali_down_co_qa_rwkv_meta-llama_Llama-3.1-70B-Instruct.pdf]

**CommonsenseQA, Qwen3-0.6B to Llama-3.1-70B**

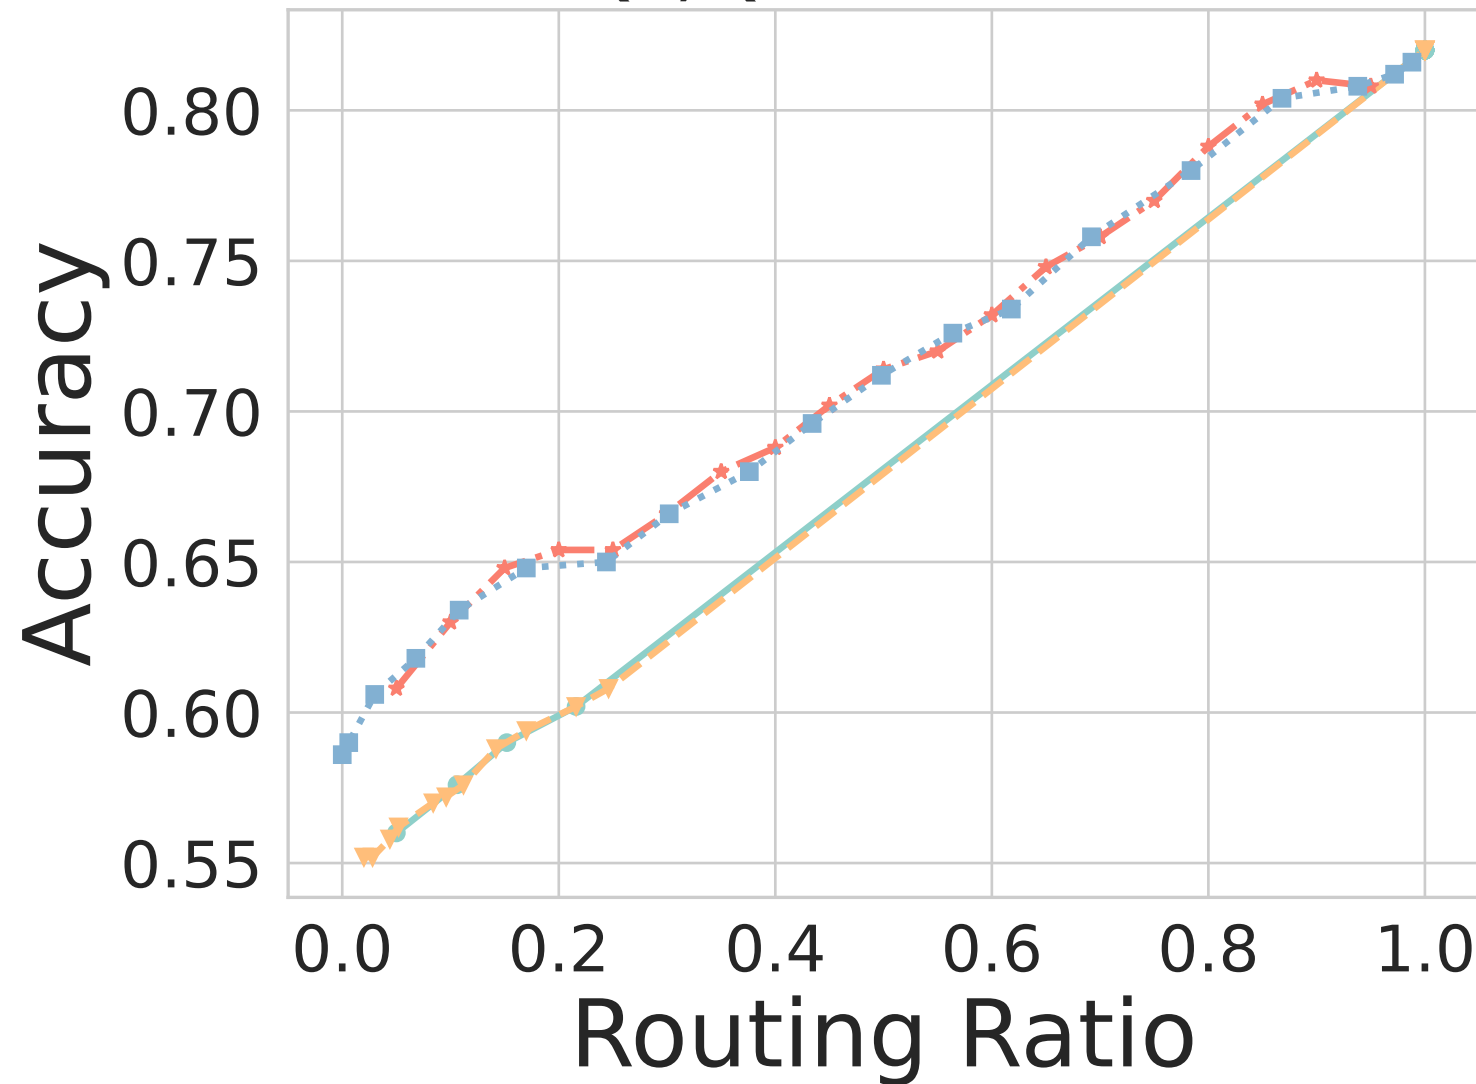

Supplement: supplementary_material [file cali_down_commonsense_qa_Qwen3-0.6B_meta-llama_Llama-3.1-70B-Instruct.pdf › Routing_SLM_LLMs/Proxy_routing_prediction/to_meta-llama_Llama-3.1-70B-Instruct/commonsense_qa_as_downstream/cali_down_commonsense_qa_Qwen3-0.6B_meta-llama_Llama-3.1-70B-Instruct.pdf]

**CommonsenseQA, Qwen3-1.7B to Llama-3.1-70B**

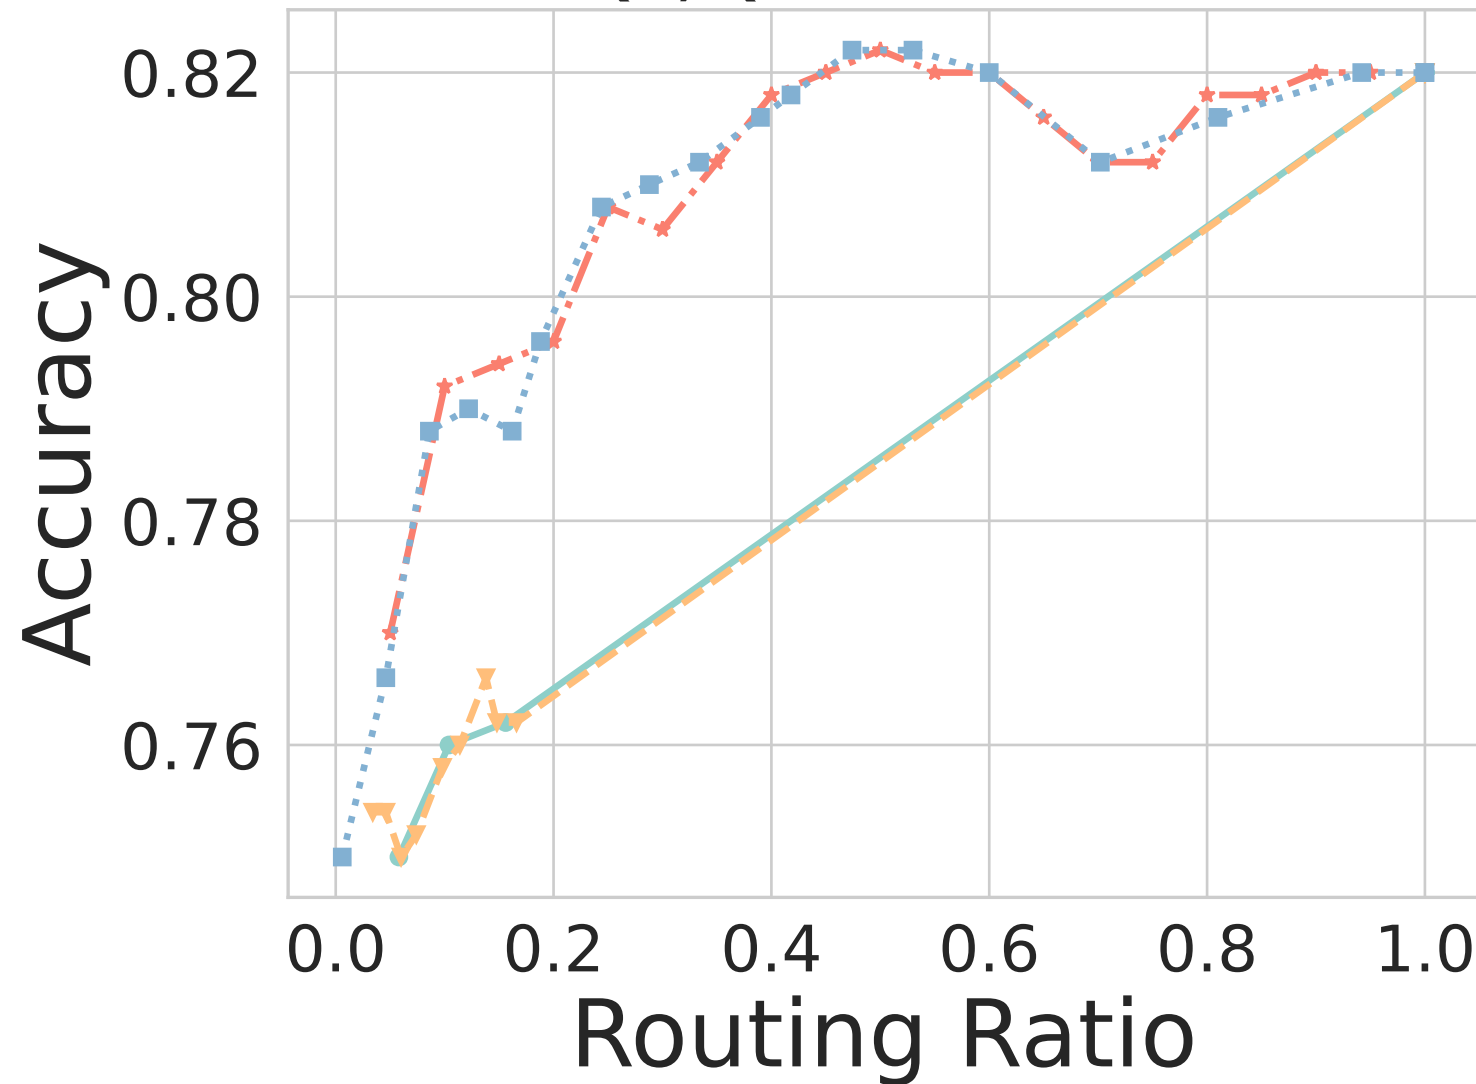

Supplement: supplementary_material [file cali_down_commonsense_qa_Qwen3-1.7B_meta-llama_Llama-3.1-70B-Instruct.pdf › Routing_SLM_LLMs/Proxy_routing_prediction/to_meta-llama_Llama-3.1-70B-Instruct/commonsense_qa_as_downstream/cali_down_commonsense_qa_Qwen3-1.7B_meta-llama_Llama-3.1-70B-Instruct.pdf]

**CommonsenseQA, Qwen3-4B to Llama-3.1-70B**

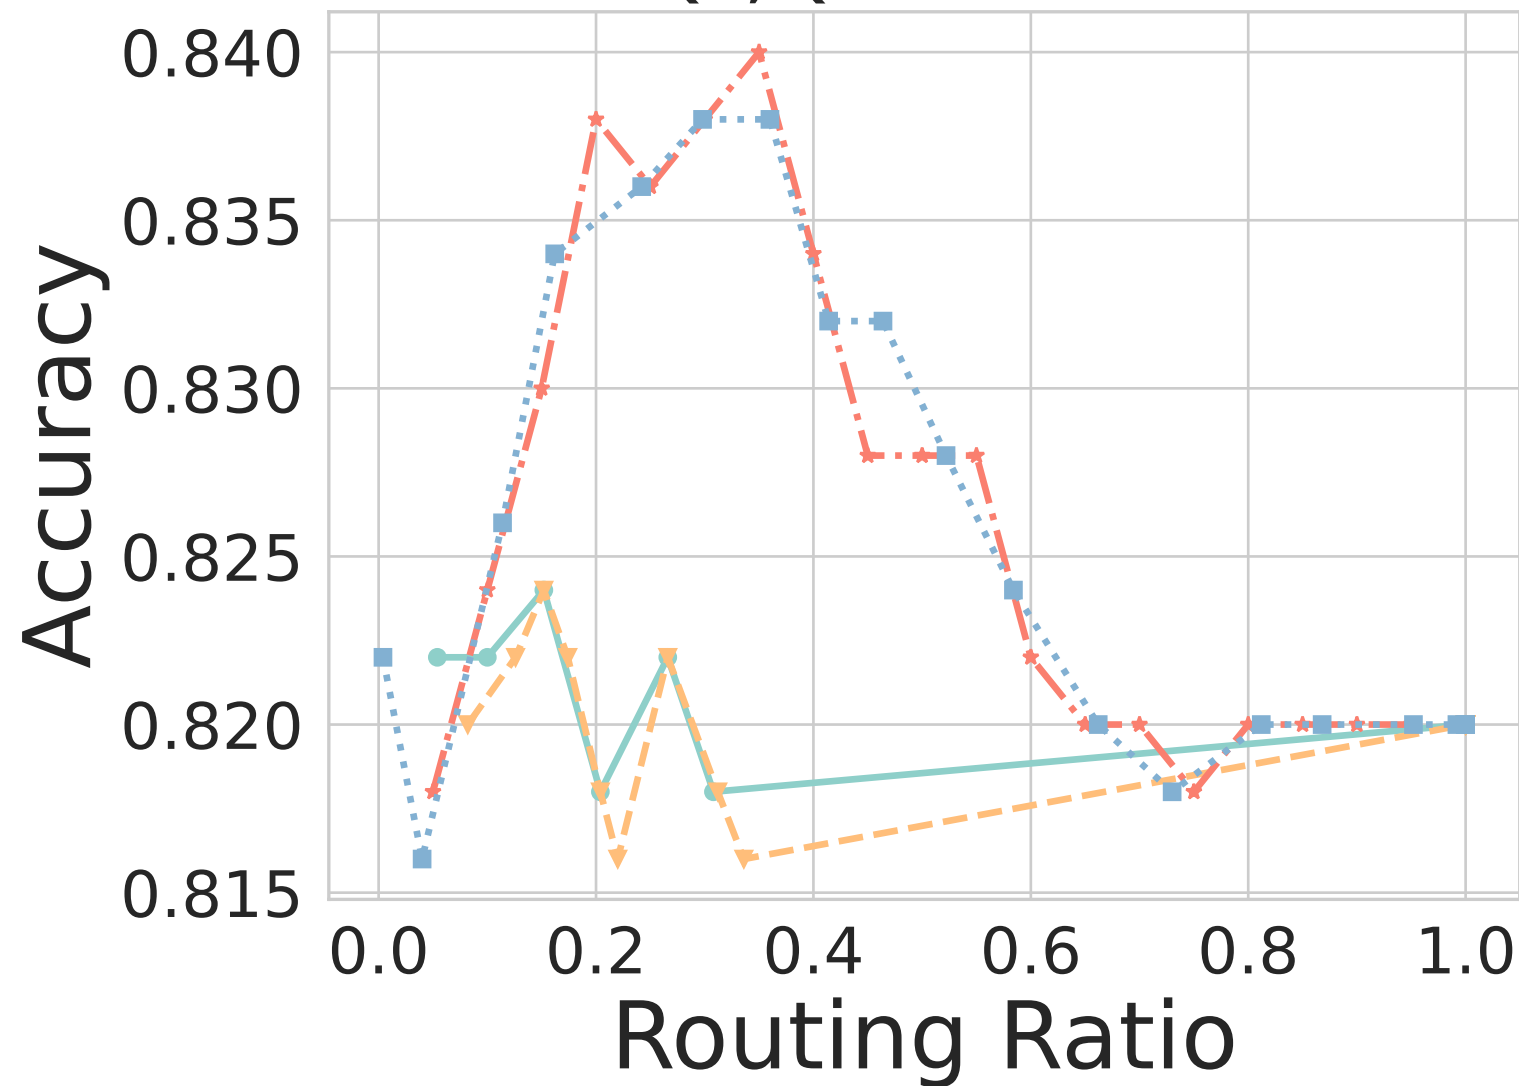

Supplement: supplementary_material [file cali_down_commonsense_qa_Qwen3-4B_meta-llama_Llama-3.1-70B-Instruct.pdf › Routing_SLM_LLMs/Proxy_routing_prediction/to_meta-llama_Llama-3.1-70B-Instruct/commonsense_qa_as_downstream/cali_down_commonsense_qa_Qwen3-4B_meta-llama_Llama-3.1-70B-Instruct.pdf]

**CommonsenseQA, granite-3.1-8b to Llama-3.1-70B**

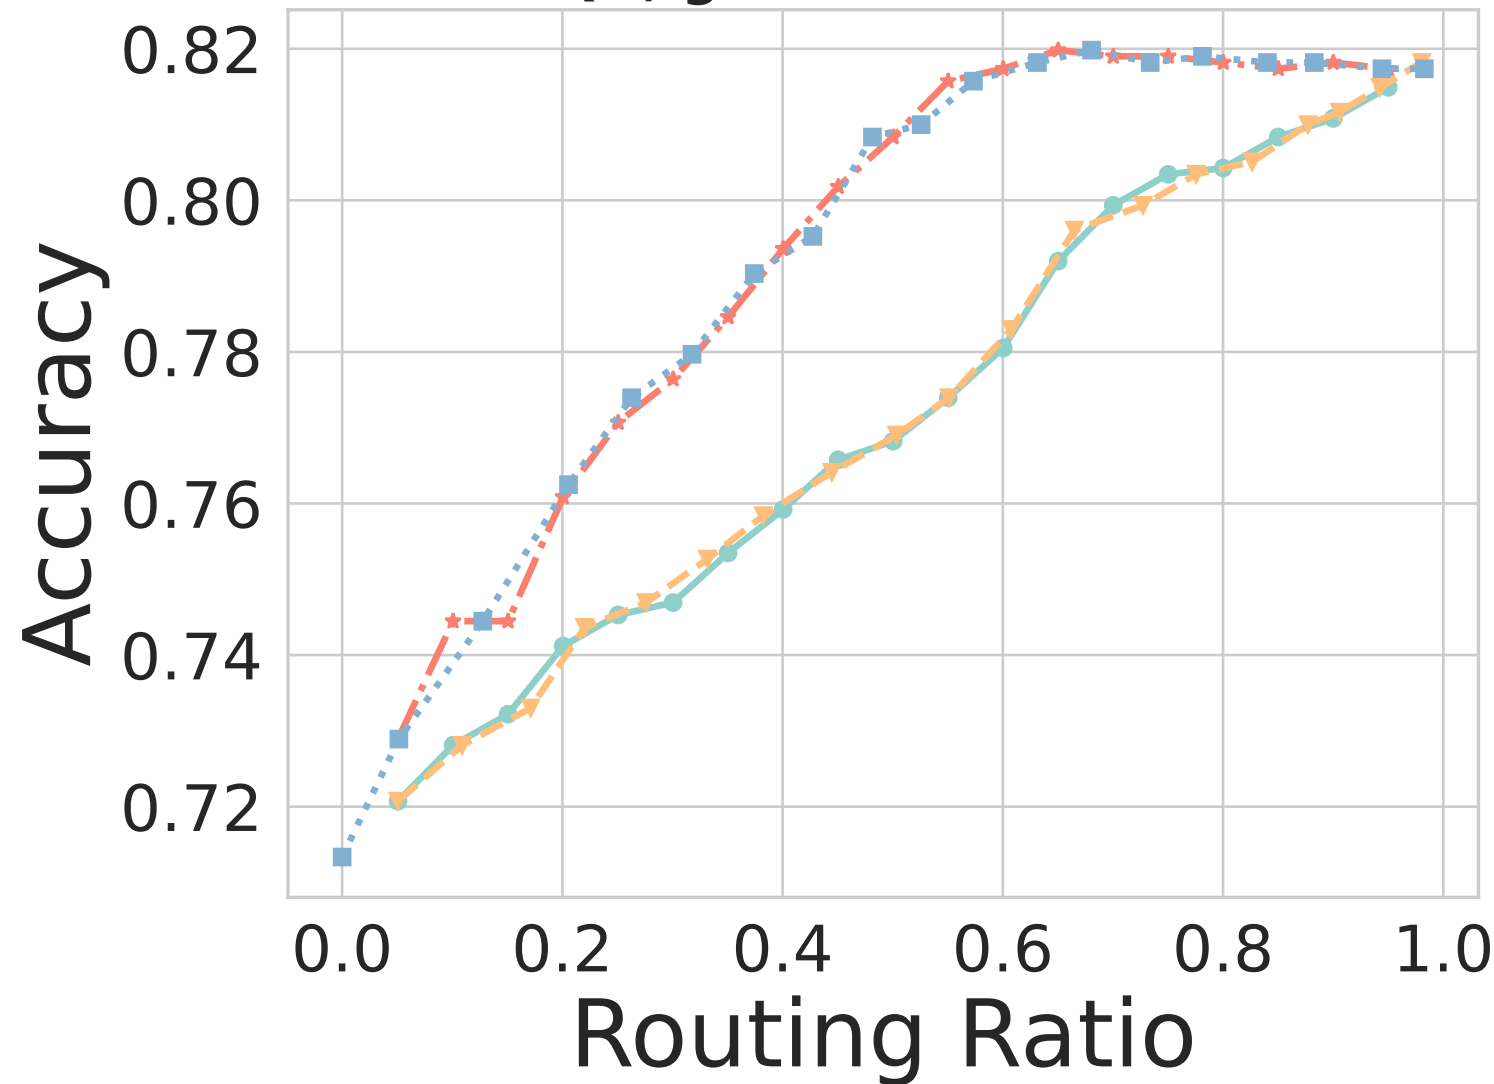

Supplement: supplementary_material [file cali_down_commonsense_qa_granite-3.1-8b_meta-llama_Llama-3.1-70B-Instruct.pdf › Routing_SLM_LLMs/Proxy_routing_prediction/to_meta-llama_Llama-3.1-70B-Instruct/commonsense_qa_as_downstream/cali_down_commonsense_qa_granite-3.1-8b_meta-llama_Llama-3.1-70B-Instruct.pdf]

**CommonsenseQA, llama-3.1-8b to Llama-3.1-70B**

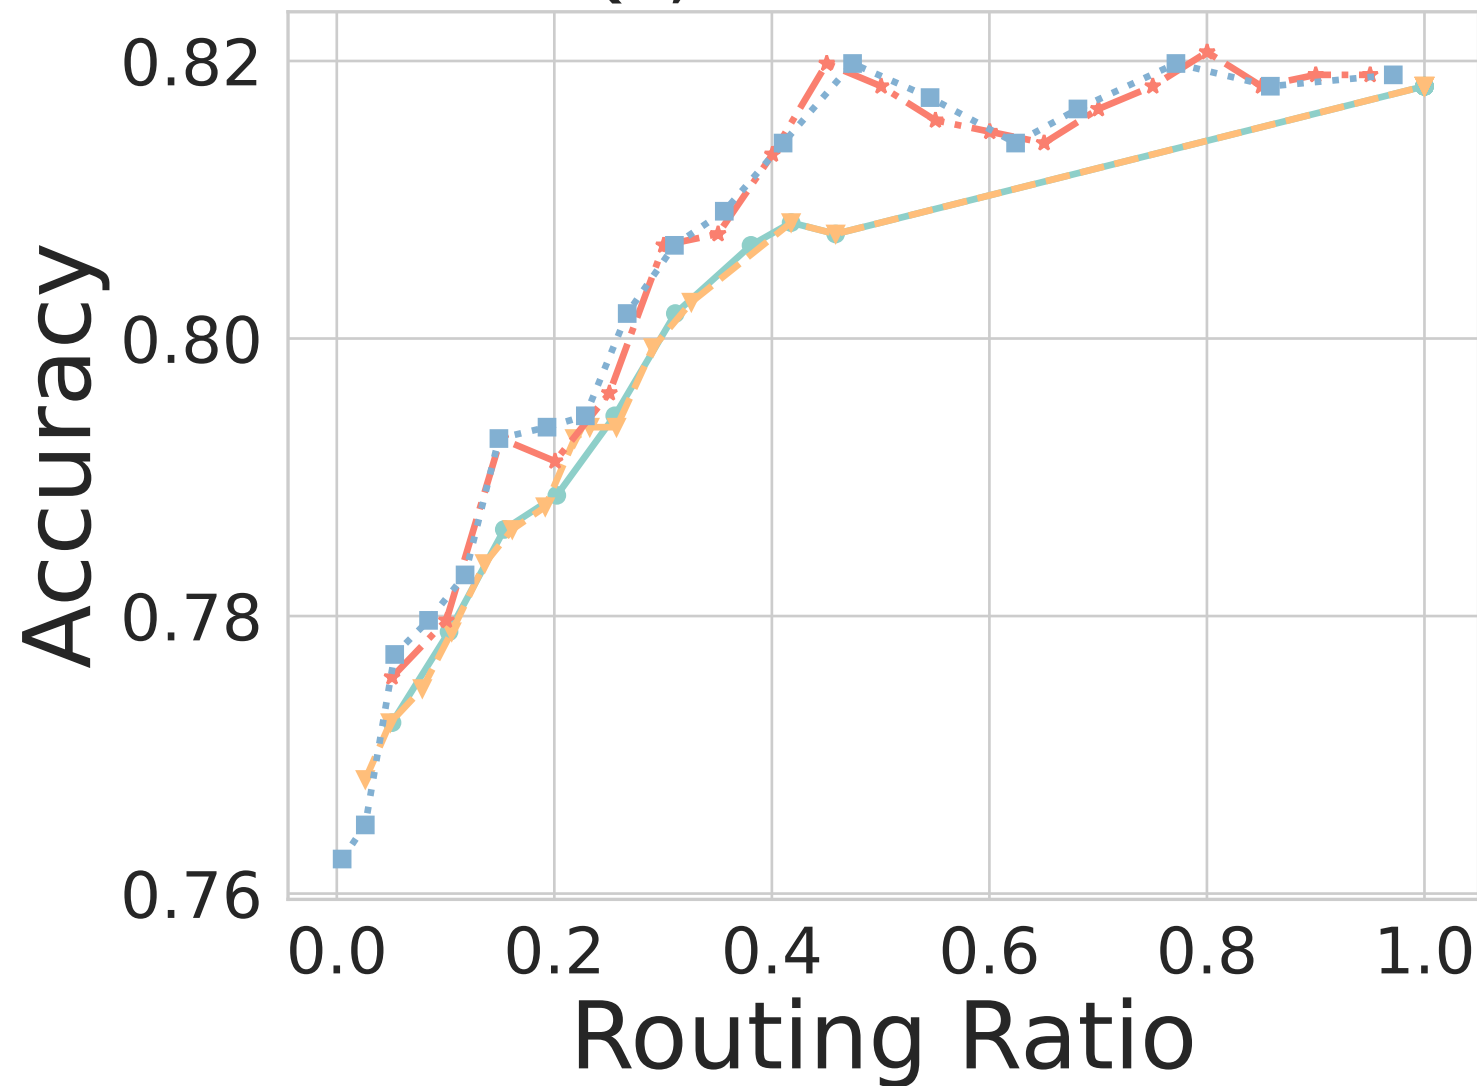

Supplement: supplementary_material [file cali_down_commonsense_qa_llama-3.1-8b_meta-llama_Llama-3.1-70B-Instruct.pdf › Routing_SLM_LLMs/Proxy_routing_prediction/to_meta-llama_Llama-3.1-70B-Instruct/commonsense_qa_as_downstream/cali_down_commonsense_qa_llama-3.1-8b_meta-llama_Llama-3.1-70B-Instruct.pdf]

# CommonsenseQA, llama-3.2-1b to Llama-3.1-70B

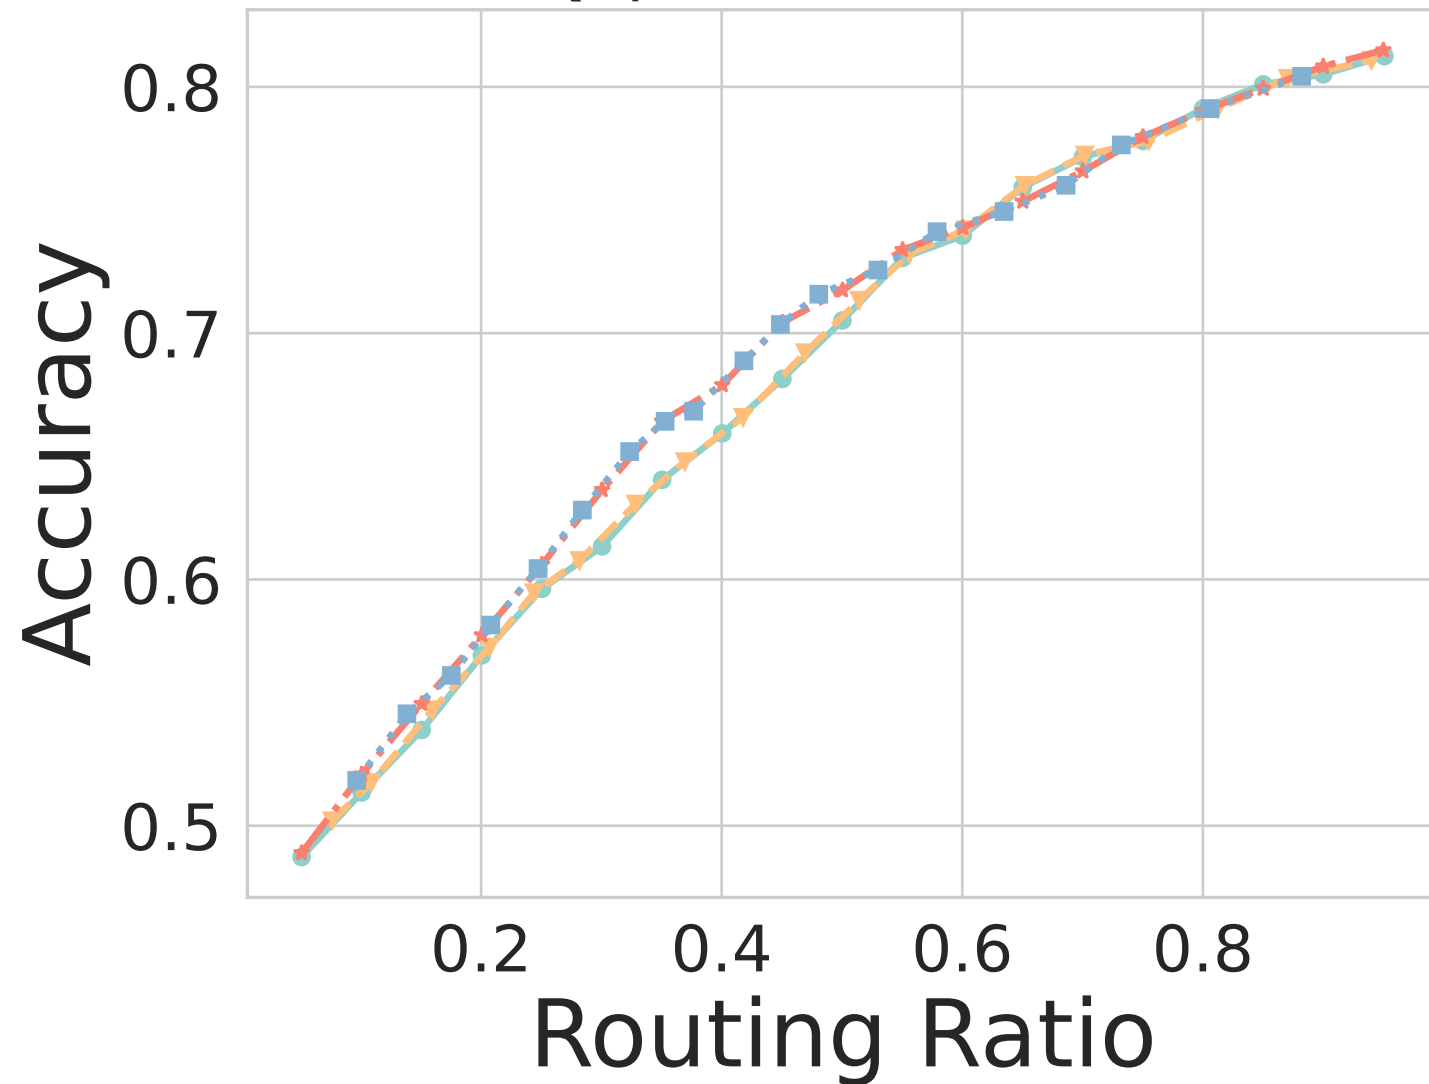

Supplement: supplementary_material [file cali_down_commonsense_qa_llama-3.2-1b_meta-llama_Llama-3.1-70B-Instruct.pdf › Routing_SLM_LLMs/Proxy_routing_prediction/to_meta-llama_Llama-3.1-70B-Instruct/commonsense_qa_as_downstream/cali_down_commonsense_qa_llama-3.2-1b_meta-llama_Llama-3.1-70B-Instruct.pdf]

**CommonsenseQA, llama-3.2-3b to Llama-3.1-70B**

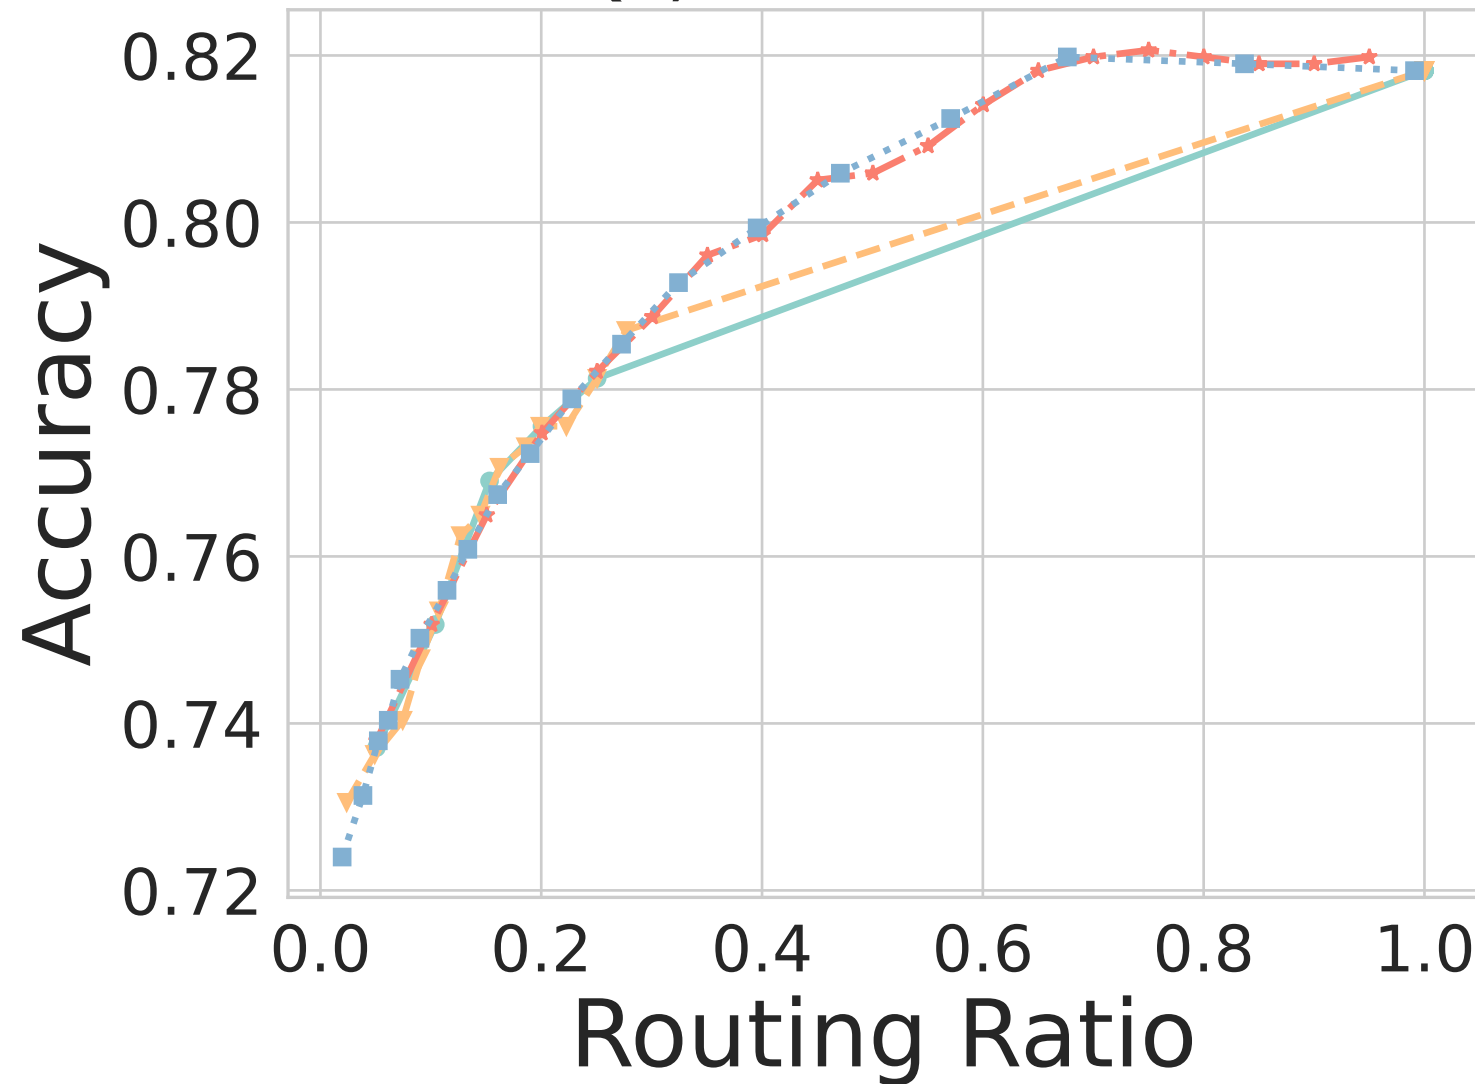

Supplement: supplementary_material [file cali_down_commonsense_qa_llama-3.2-3b_meta-llama_Llama-3.1-70B-Instruct.pdf › Routing_SLM_LLMs/Proxy_routing_prediction/to_meta-llama_Llama-3.1-70B-Instruct/commonsense_qa_as_downstream/cali_down_commonsense_qa_llama-3.2-3b_meta-llama_Llama-3.1-70B-Instruct.pdf]

CommonsenseQA, mistral-7b to Llama-3.1-70B

Accuracy

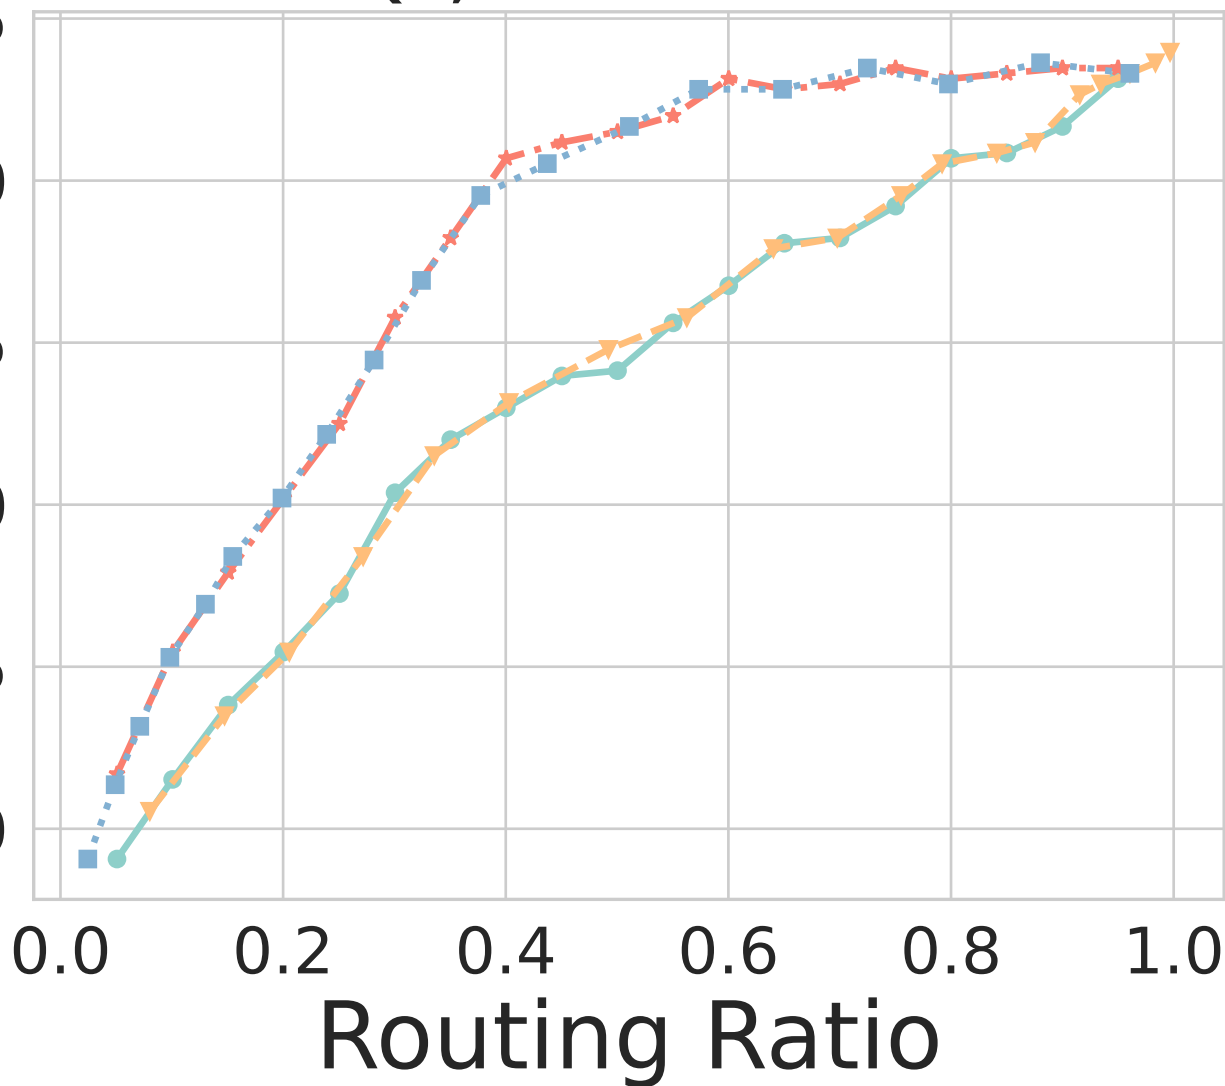

Supplement: supplementary_material [file cali_down_commonsense_qa_mistral-7b_meta-llama_Llama-3.1-70B-Instruct.pdf › Routing_SLM_LLMs/Proxy_routing_prediction/to_meta-llama_Llama-3.1-70B-Instruct/commonsense_qa_as_downstream/cali_down_commonsense_qa_mistral-7b_meta-llama_Llama-3.1-70B-Instruct.pdf]

**CommonsenseQA, phi-3.5-mini to Llama-3.1-70B**

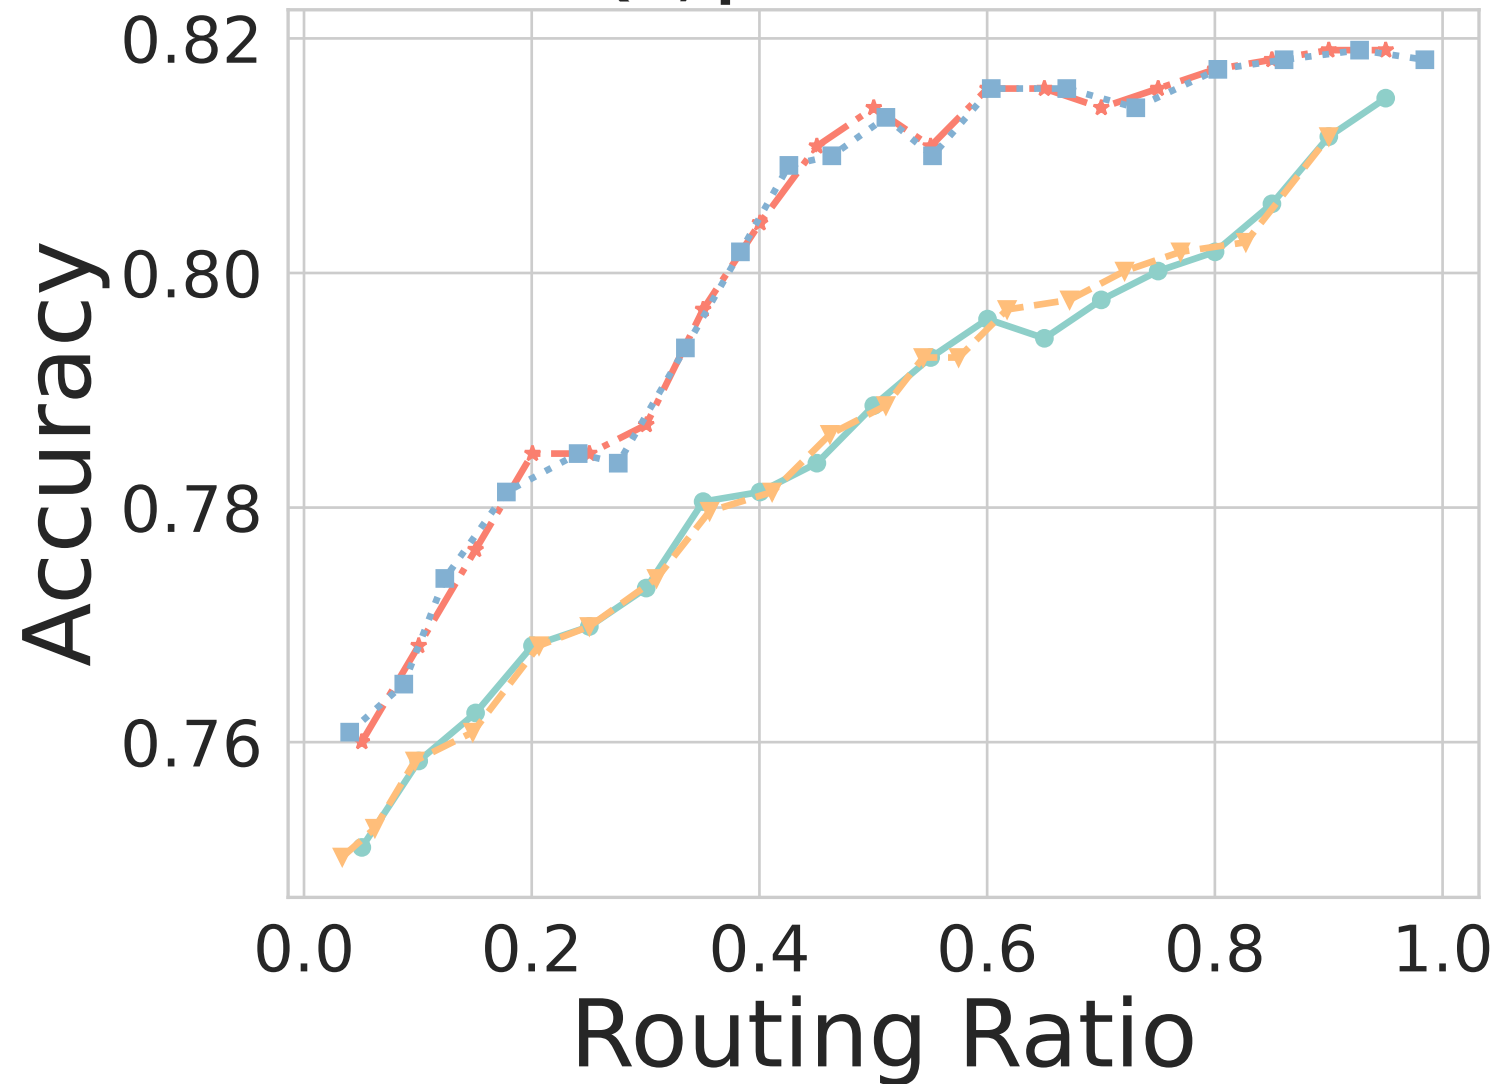

Supplement: supplementary_material [file cali_down_commonsense_qa_phi-3.5-mini_meta-llama_Llama-3.1-70B-Instruct.pdf › Routing_SLM_LLMs/Proxy_routing_prediction/to_meta-llama_Llama-3.1-70B-Instruct/commonsense_qa_as_downstream/cali_down_commonsense_qa_phi-3.5-mini_meta-llama_Llama-3.1-70B-Instruct.pdf]

CommonsenseQA, phi-4-mini-reasoning to Llama-3.1-70B

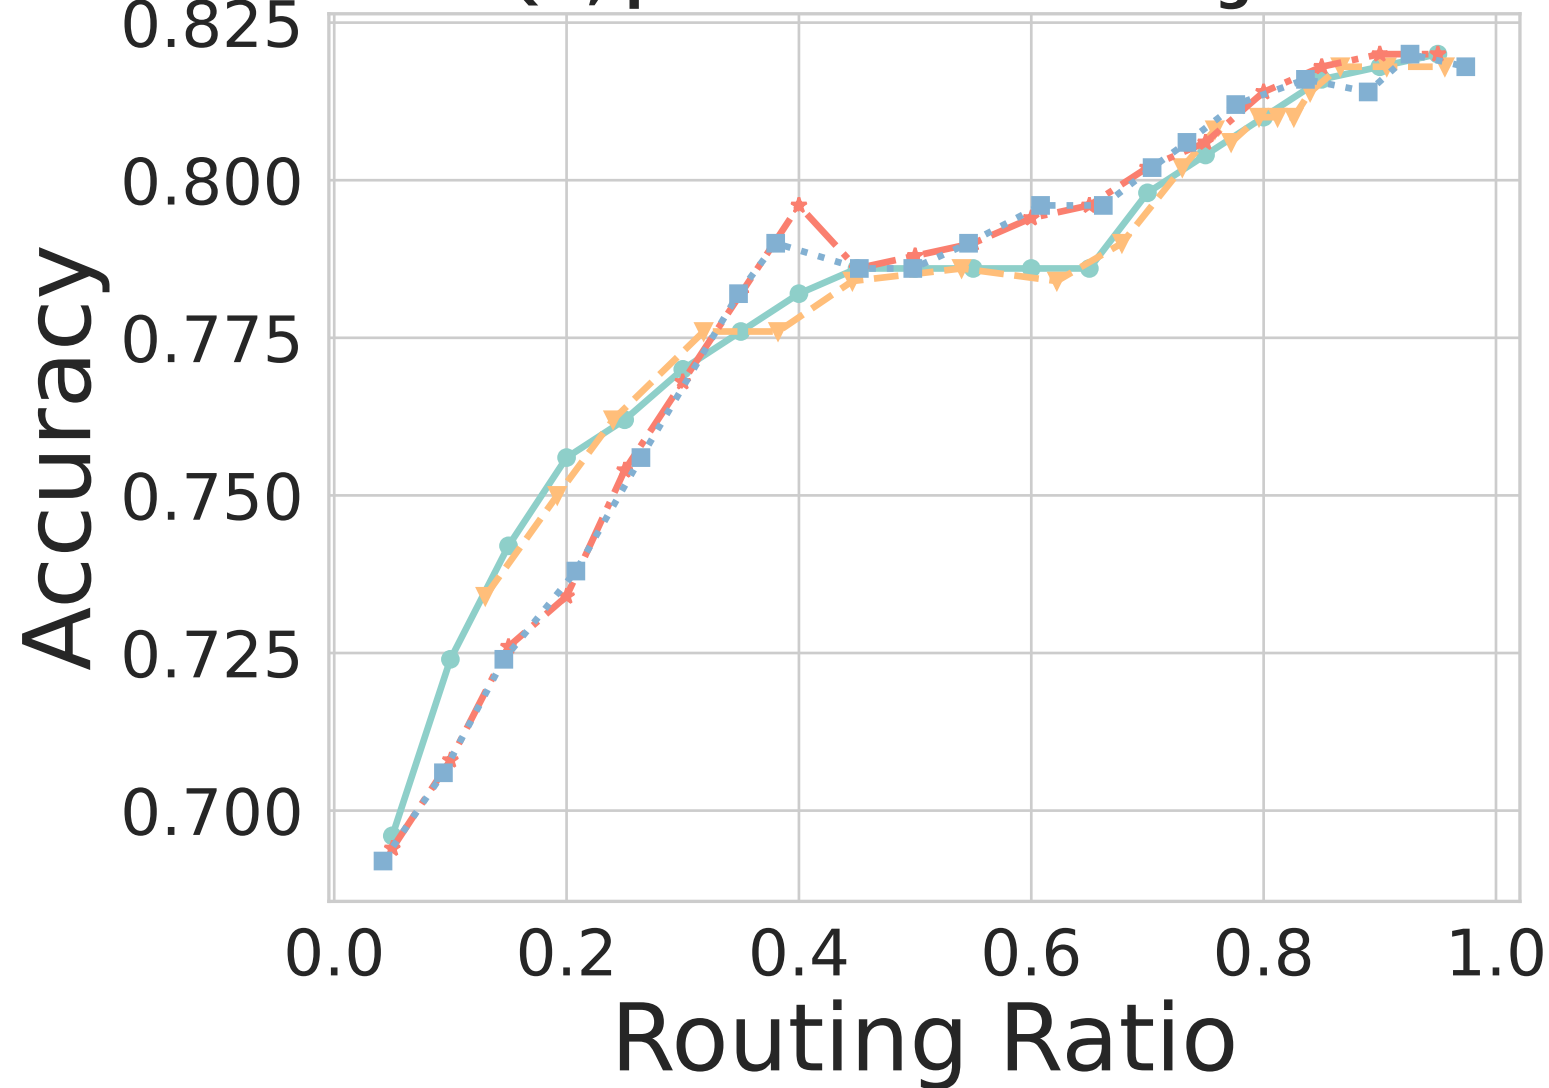

Supplement: supplementary_material [file cali_down_commonsense_qa_phi-4-mini-reasoning_meta-llama_Llama-3.1-70B-Instruct.pdf › Routing_SLM_LLMs/Proxy_routing_prediction/to_meta-llama_Llama-3.1-70B-Instruct/commonsense_qa_as_downstream/cali_down_commonsense_qa_phi-4-mini-reasoning_meta-llama_Llama-3.1-70B-Instruct.pdf]

CommonsenseQA, qwen-2.5-7b to Llama-3.1-70B

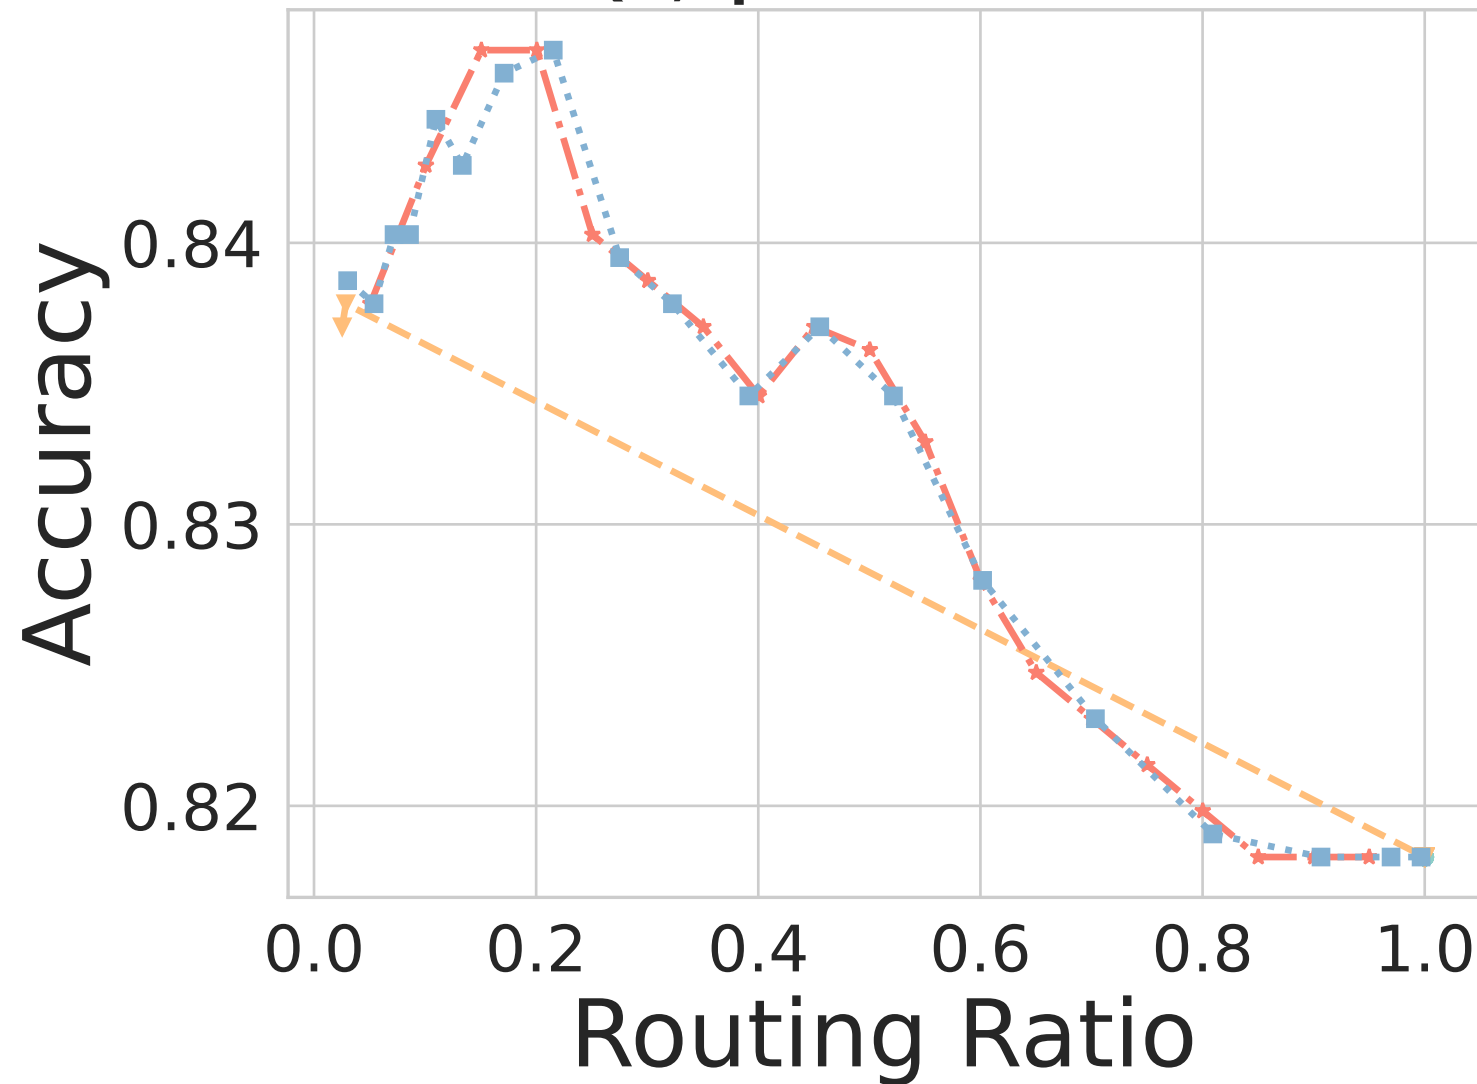

Supplement: supplementary_material [file cali_down_commonsense_qa_qwen-2.5-7b_meta-llama_Llama-3.1-70B-Instruct.pdf › Routing_SLM_LLMs/Proxy_routing_prediction/to_meta-llama_Llama-3.1-70B-Instruct/commonsense_qa_as_downstream/cali_down_commonsense_qa_qwen-2.5-7b_meta-llama_Llama-3.1-70B-Instruct.pdf]

**CommonsenseQA, rwkv to Llama-3.1-70B**

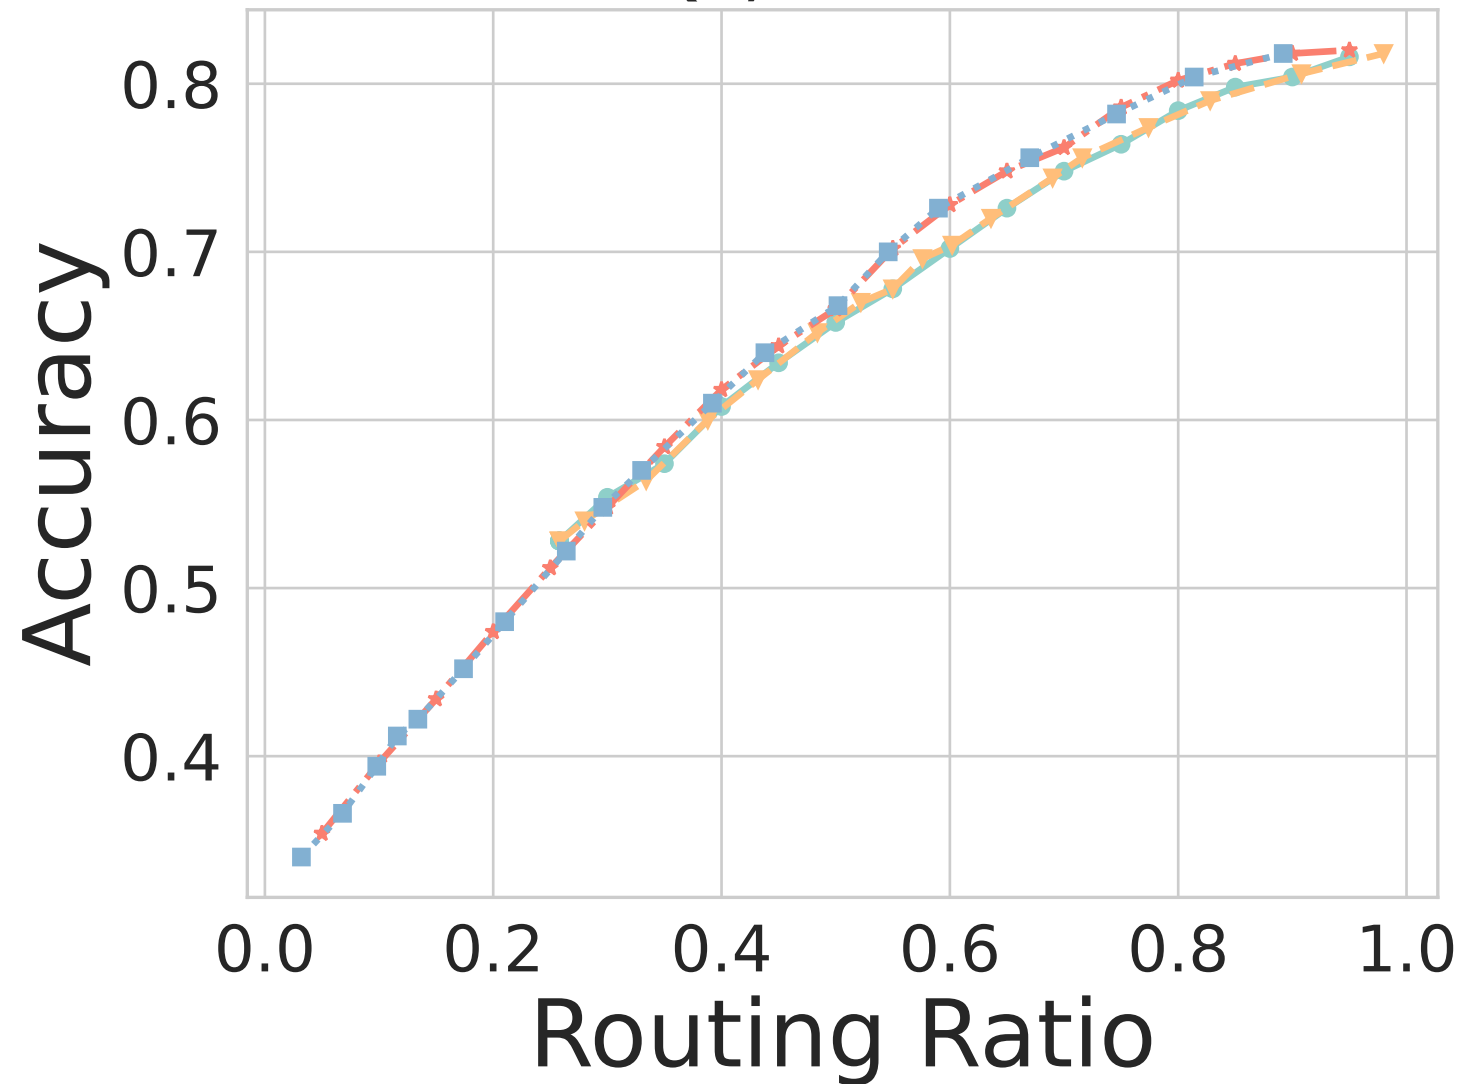

Supplement: supplementary_material [file cali_down_commonsense_qa_rwkv_meta-llama_Llama-3.1-70B-Instruct.pdf › Routing_SLM_LLMs/Proxy_routing_prediction/to_meta-llama_Llama-3.1-70B-Instruct/commonsense_qa_as_downstream/cali_down_commonsense_qa_rwkv_meta-llama_Llama-3.1-70B-Instruct.pdf]

**GSM8K, Qwen3-0.6B to Llama-3.1-70B**

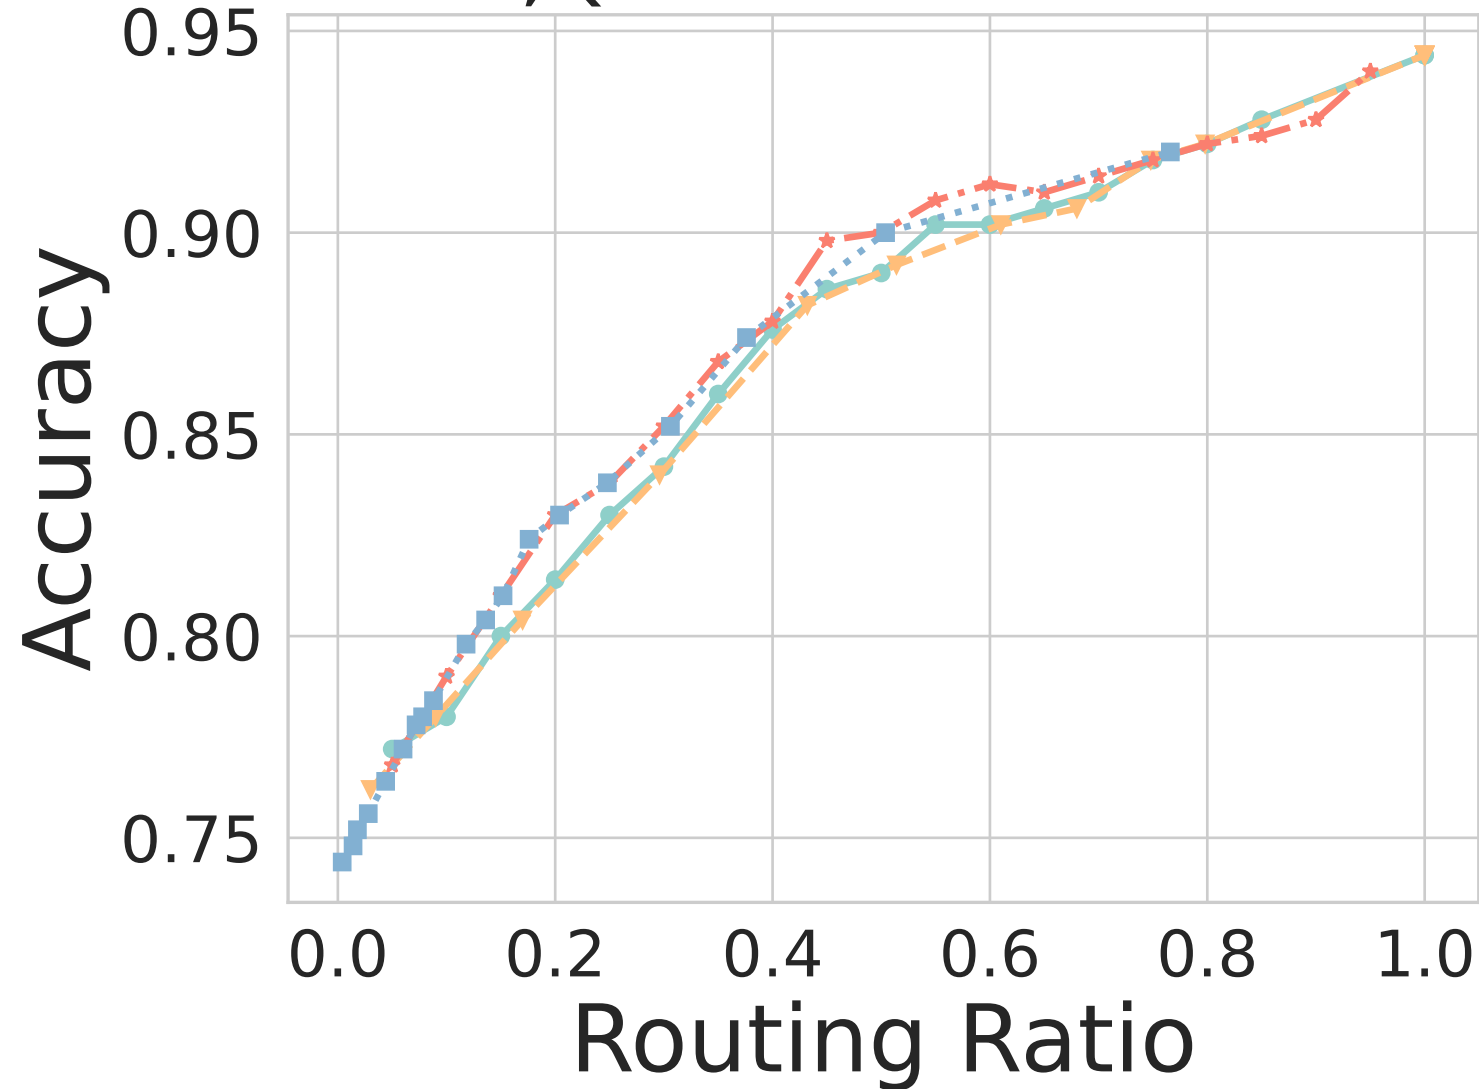

Supplement: supplementary_material [file cali_down_gsm8k_Qwen3-0.6B_meta-llama_Llama-3.1-70B-Instruct.pdf › Routing_SLM_LLMs/Proxy_routing_prediction/to_meta-llama_Llama-3.1-70B-Instruct/gsm8k_as_downstream/cali_down_gsm8k_Qwen3-0.6B_meta-llama_Llama-3.1-70B-Instruct.pdf]

**GSM8K, Qwen3-1.7B to Llama-3.1-70B**

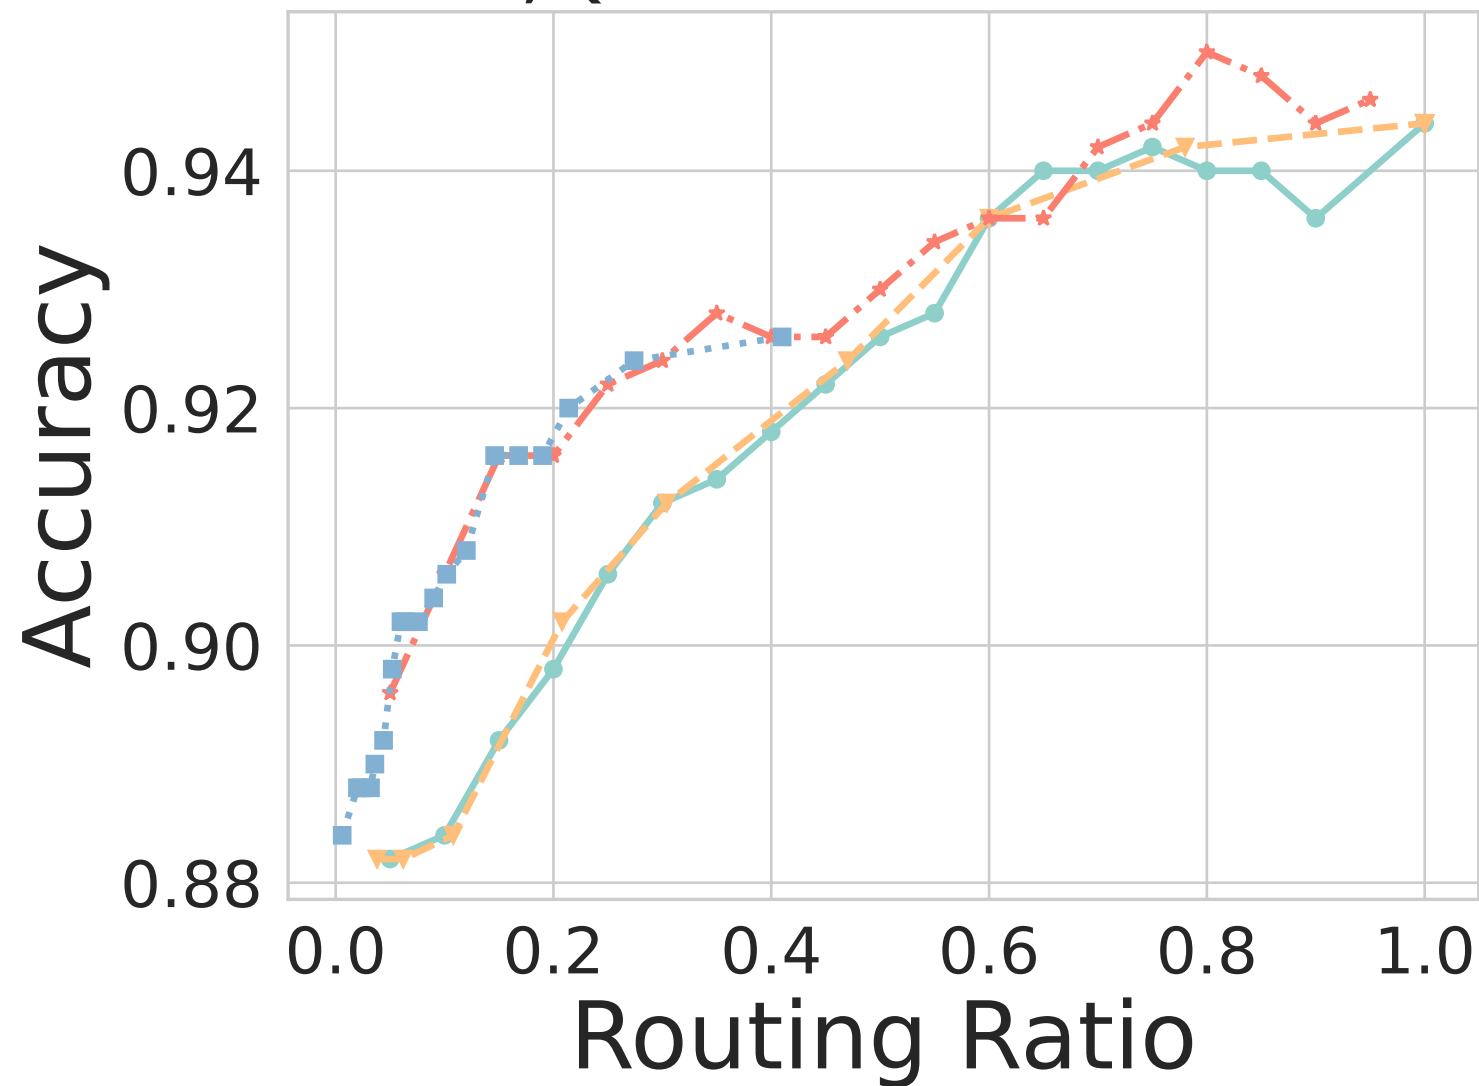

Supplement: supplementary_material [file cali_down_gsm8k_Qwen3-1.7B_meta-llama_Llama-3.1-70B-Instruct.pdf › Routing_SLM_LLMs/Proxy_routing_prediction/to_meta-llama_Llama-3.1-70B-Instruct/gsm8k_as_downstream/cali_down_gsm8k_Qwen3-1.7B_meta-llama_Llama-3.1-70B-Instruct.pdf]

**GSM8K, Qwen3-4B to Llama-3.1-70B**

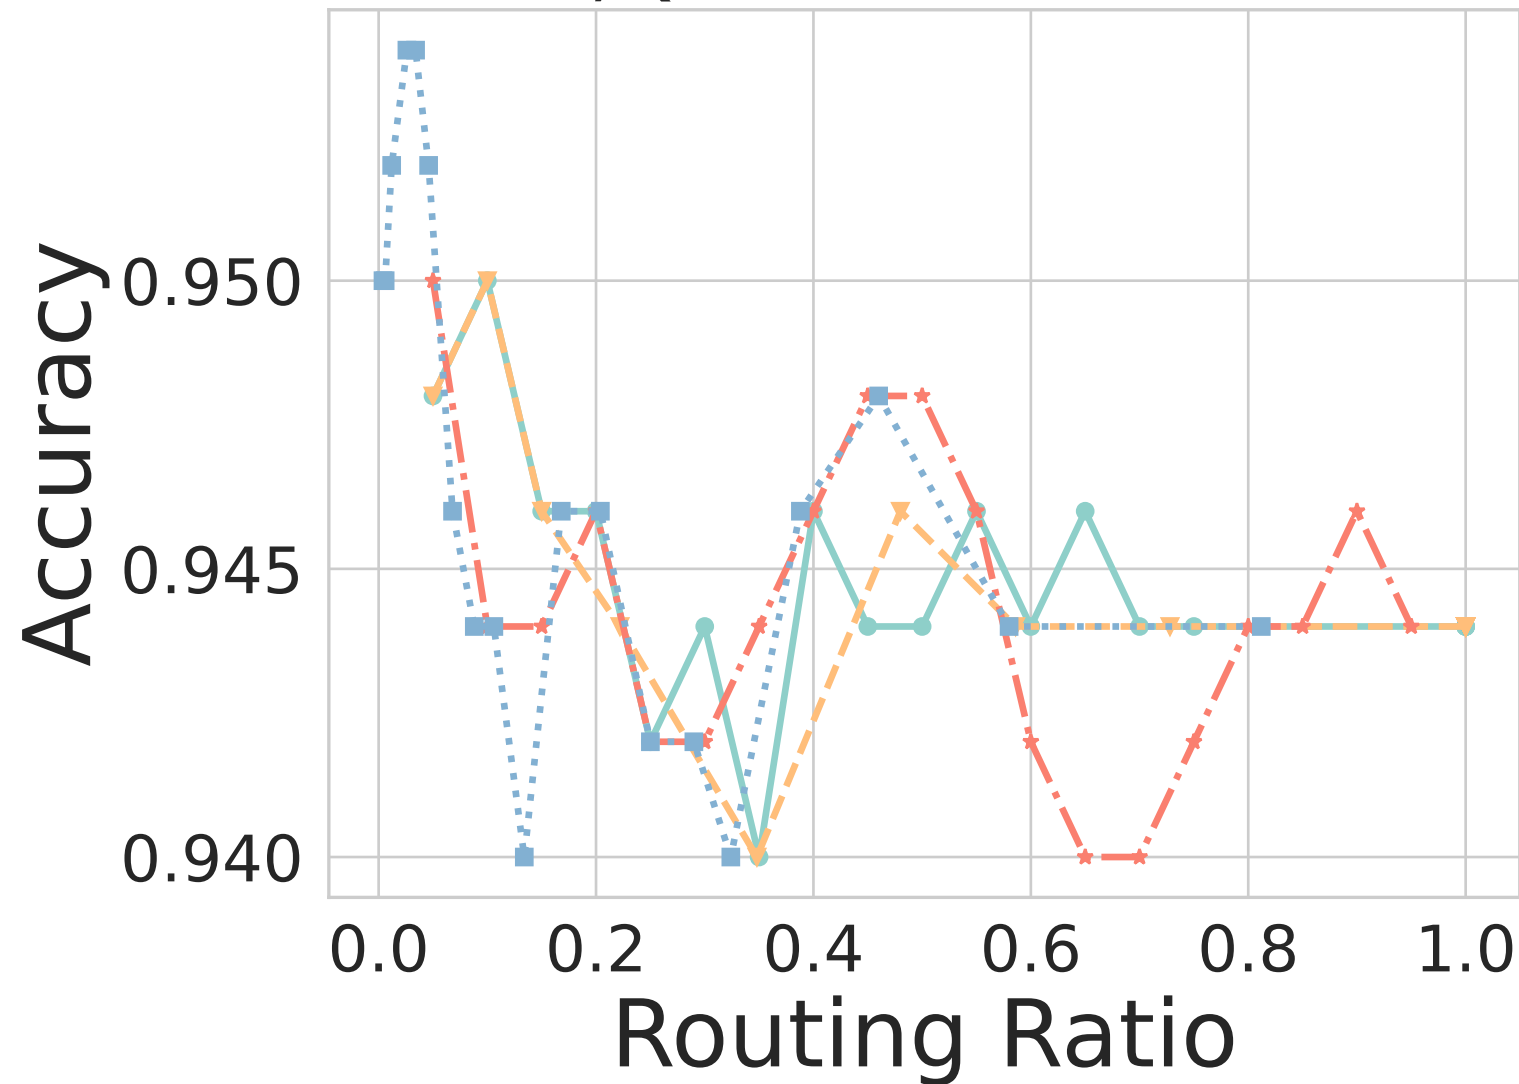

Supplement: supplementary_material [file cali_down_gsm8k_Qwen3-4B_meta-llama_Llama-3.1-70B-Instruct.pdf › Routing_SLM_LLMs/Proxy_routing_prediction/to_meta-llama_Llama-3.1-70B-Instruct/gsm8k_as_downstream/cali_down_gsm8k_Qwen3-4B_meta-llama_Llama-3.1-70B-Instruct.pdf]

**GSM8K, granite-3.1-8b to Llama-3.1-70B**

Accuracy

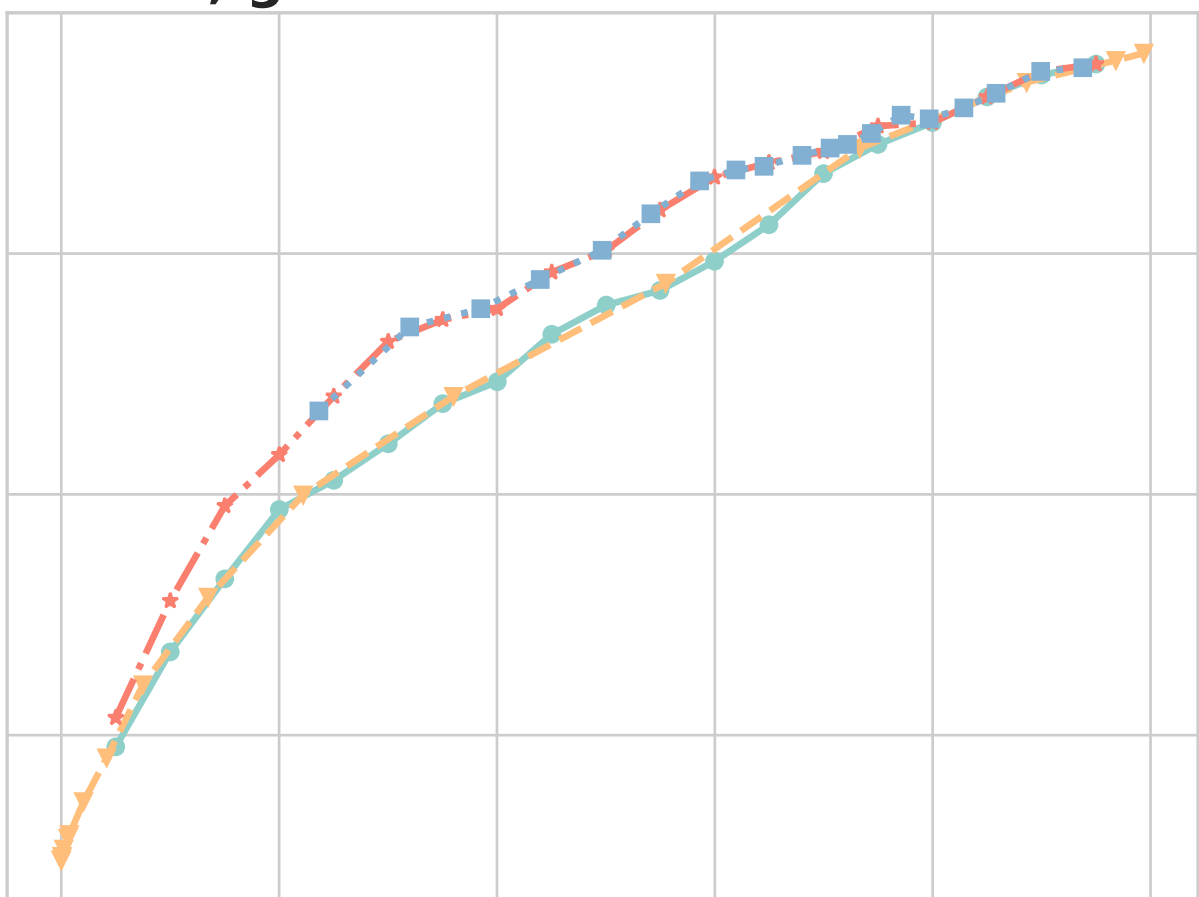

Routing Ratio

Supplement: supplementary_material [file cali_down_gsm8k_granite-3.1-8b_meta-llama_Llama-3.1-70B-Instruct.pdf › Routing_SLM_LLMs/Proxy_routing_prediction/to_meta-llama_Llama-3.1-70B-Instruct/gsm8k_as_downstream/cali_down_gsm8k_granite-3.1-8b_meta-llama_Llama-3.1-70B-Instruct.pdf]

**GSM8K, llama-3.1-8b to Llama-3.1-70B**

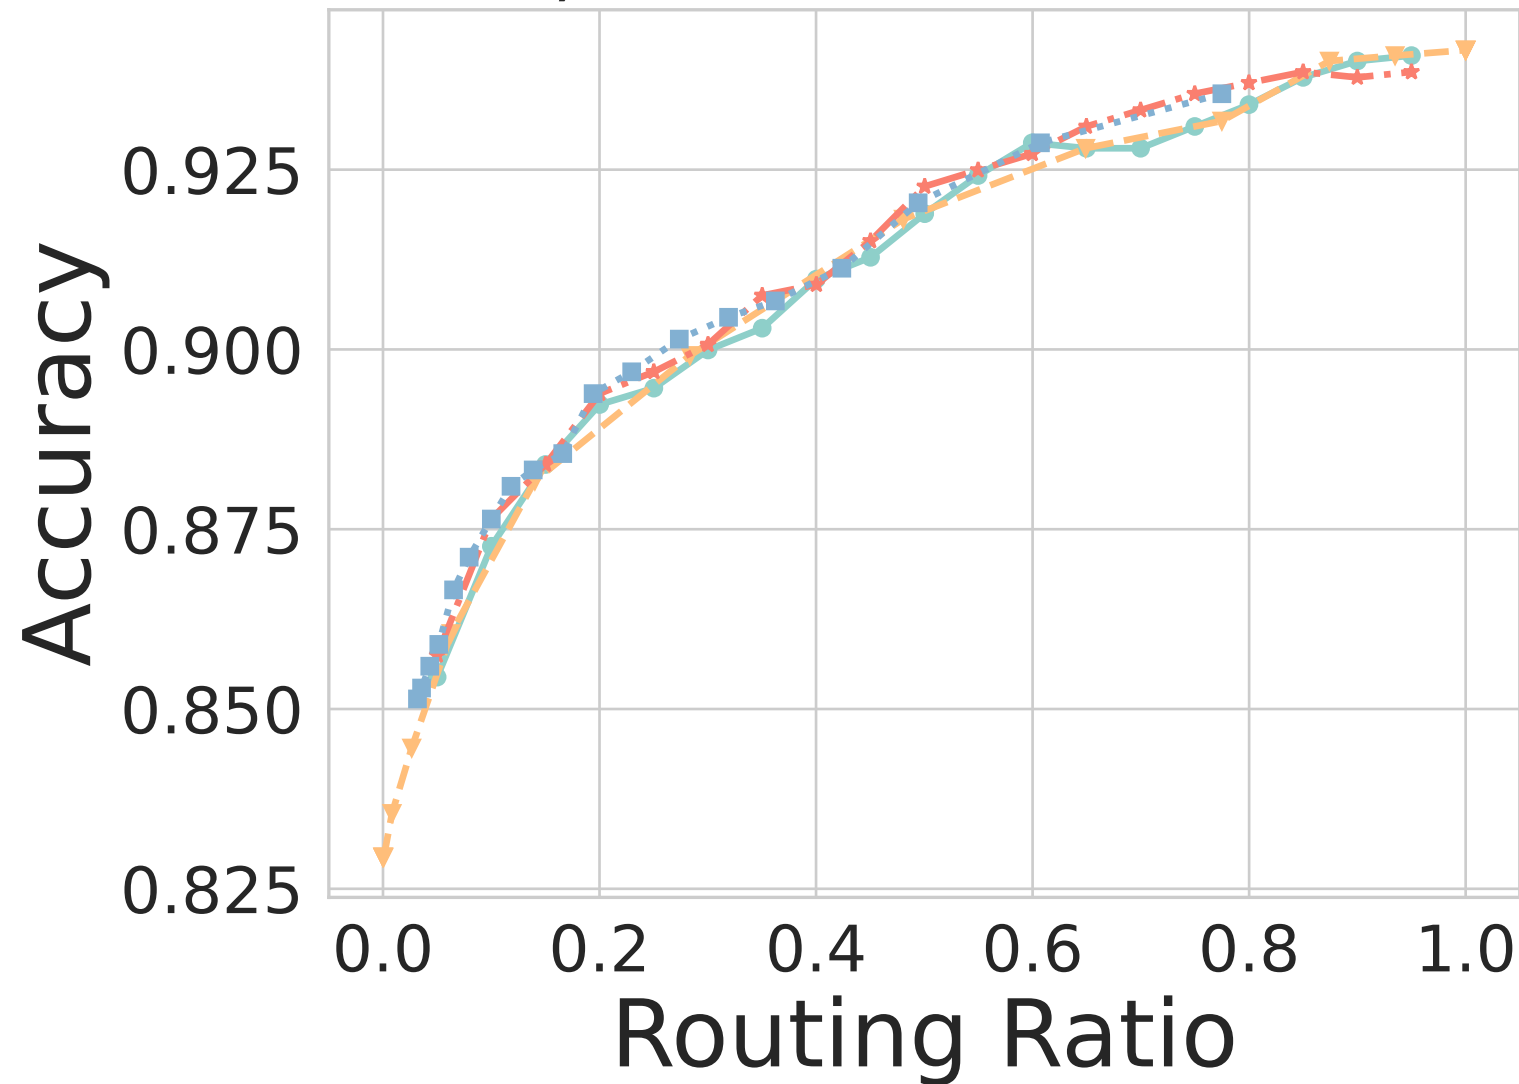

Supplement: supplementary_material [file cali_down_gsm8k_llama-3.1-8b_meta-llama_Llama-3.1-70B-Instruct.pdf › Routing_SLM_LLMs/Proxy_routing_prediction/to_meta-llama_Llama-3.1-70B-Instruct/gsm8k_as_downstream/cali_down_gsm8k_llama-3.1-8b_meta-llama_Llama-3.1-70B-Instruct.pdf]

**GSM8K, llama-3.2-1b to Llama-3.1-70B**

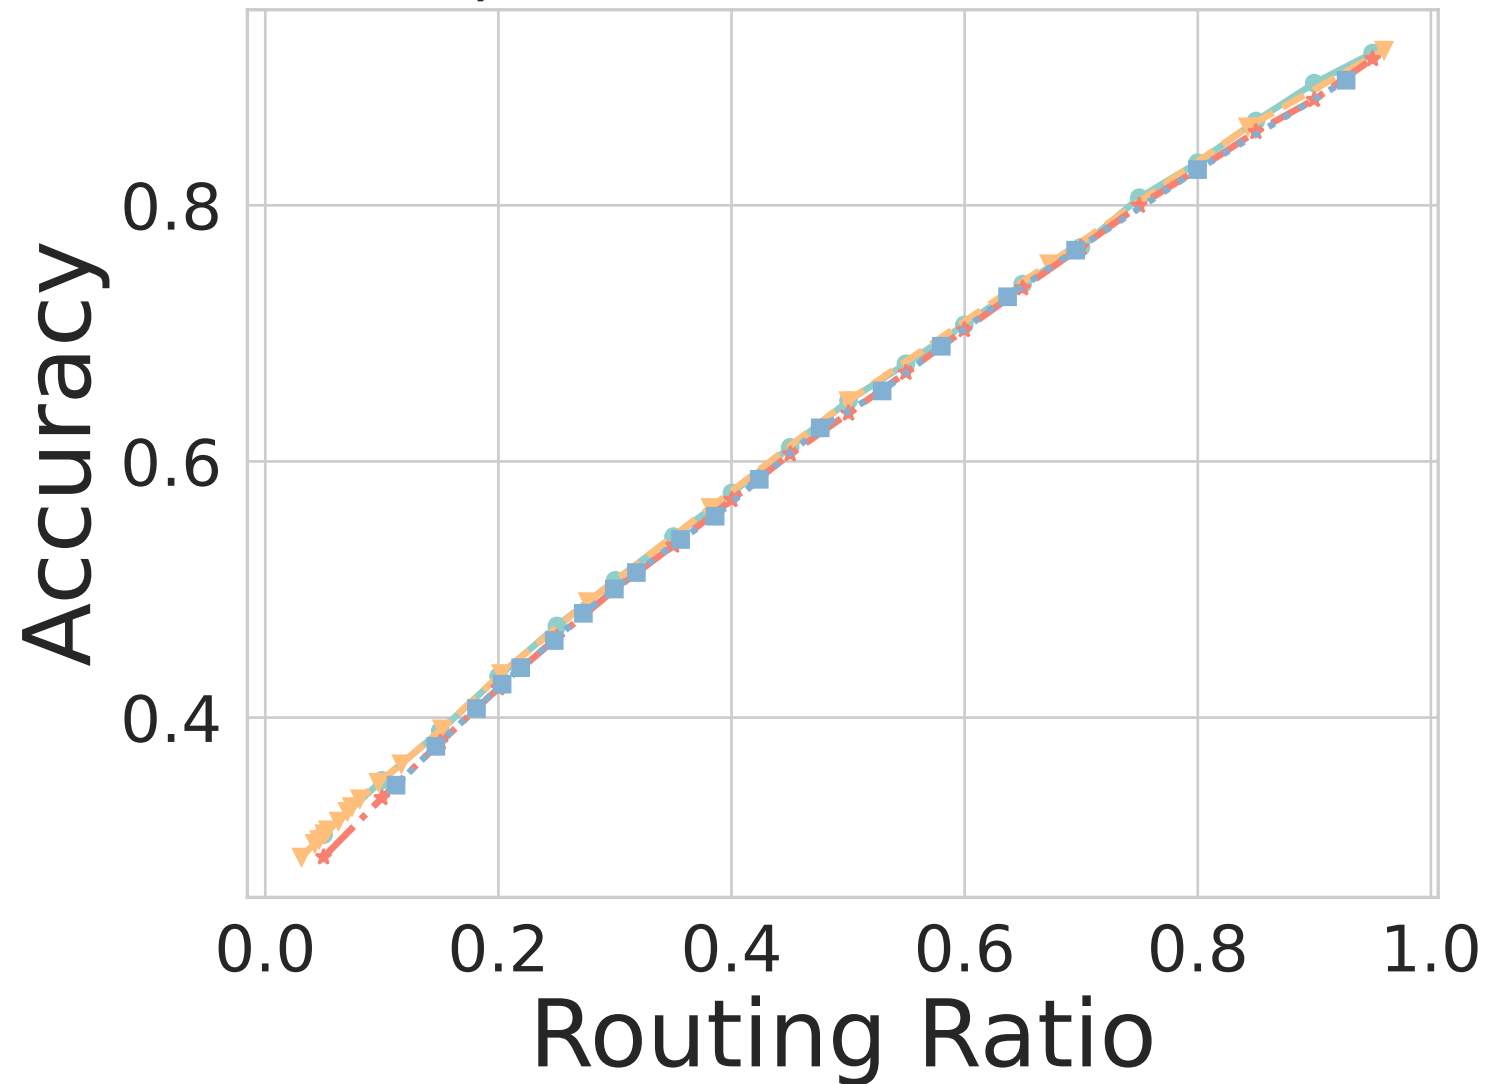

Supplement: supplementary_material [file cali_down_gsm8k_llama-3.2-1b_meta-llama_Llama-3.1-70B-Instruct.pdf › Routing_SLM_LLMs/Proxy_routing_prediction/to_meta-llama_Llama-3.1-70B-Instruct/gsm8k_as_downstream/cali_down_gsm8k_llama-3.2-1b_meta-llama_Llama-3.1-70B-Instruct.pdf]

**GSM8K, llama-3.2-3b to Llama-3.1-70B**

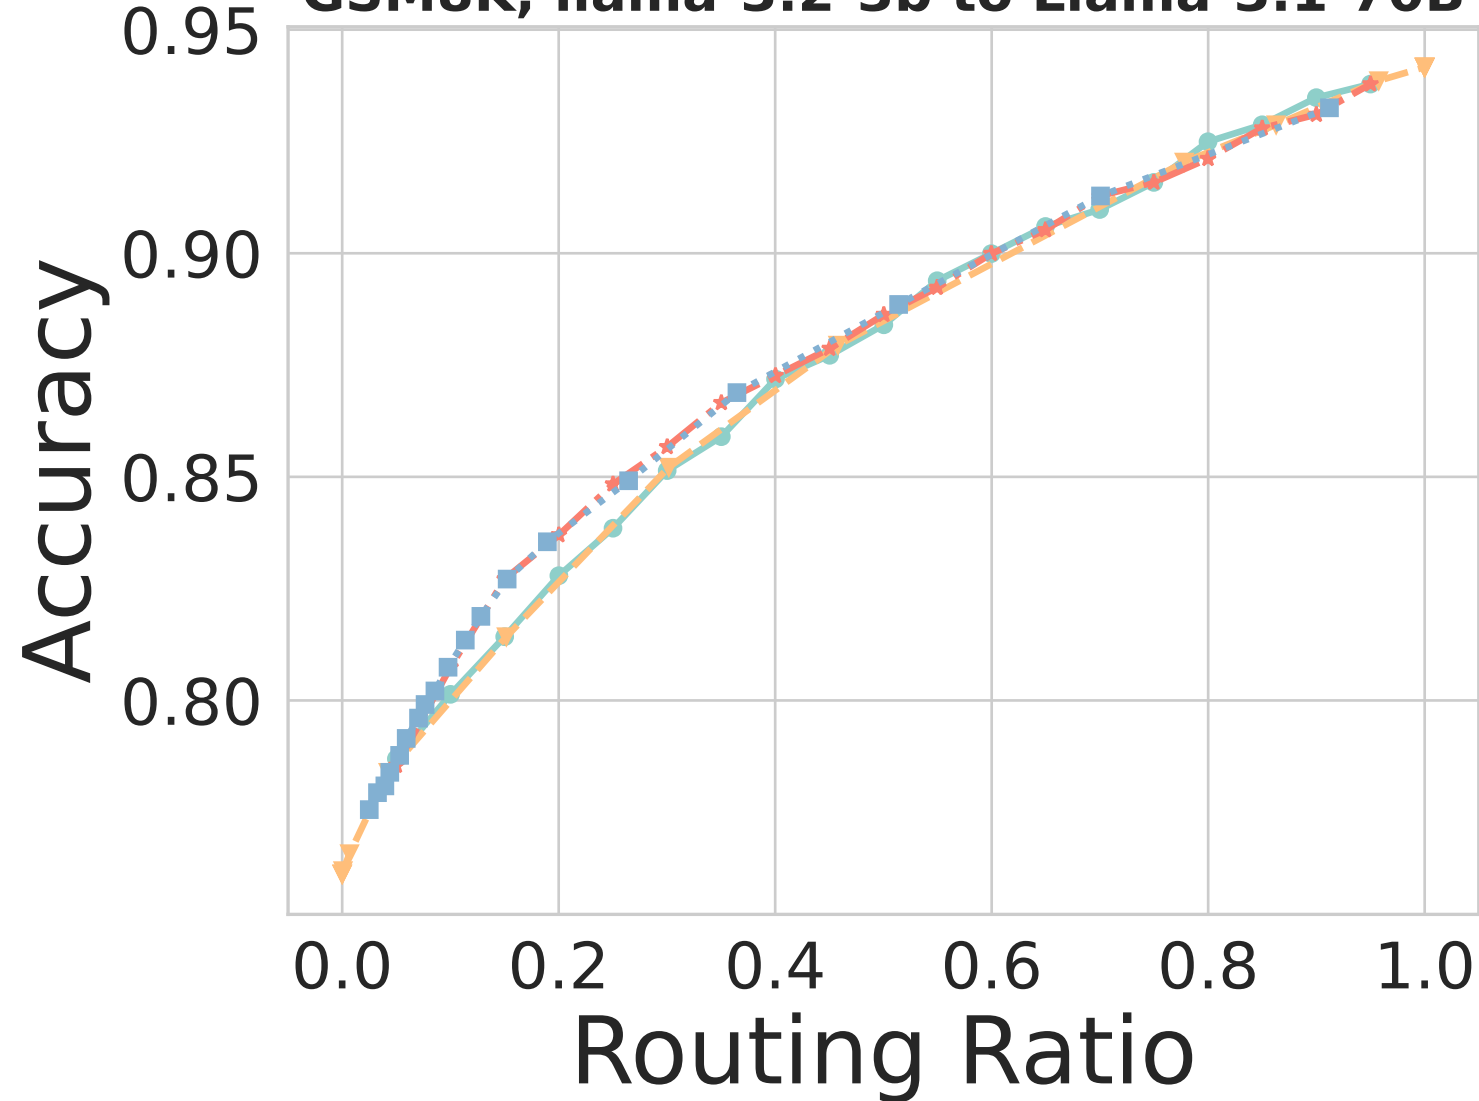

Supplement: supplementary_material [file cali_down_gsm8k_llama-3.2-3b_meta-llama_Llama-3.1-70B-Instruct.pdf › Routing_SLM_LLMs/Proxy_routing_prediction/to_meta-llama_Llama-3.1-70B-Instruct/gsm8k_as_downstream/cali_down_gsm8k_llama-3.2-3b_meta-llama_Llama-3.1-70B-Instruct.pdf]

**GSM8K, mistral-7b to Llama-3.1-70B**

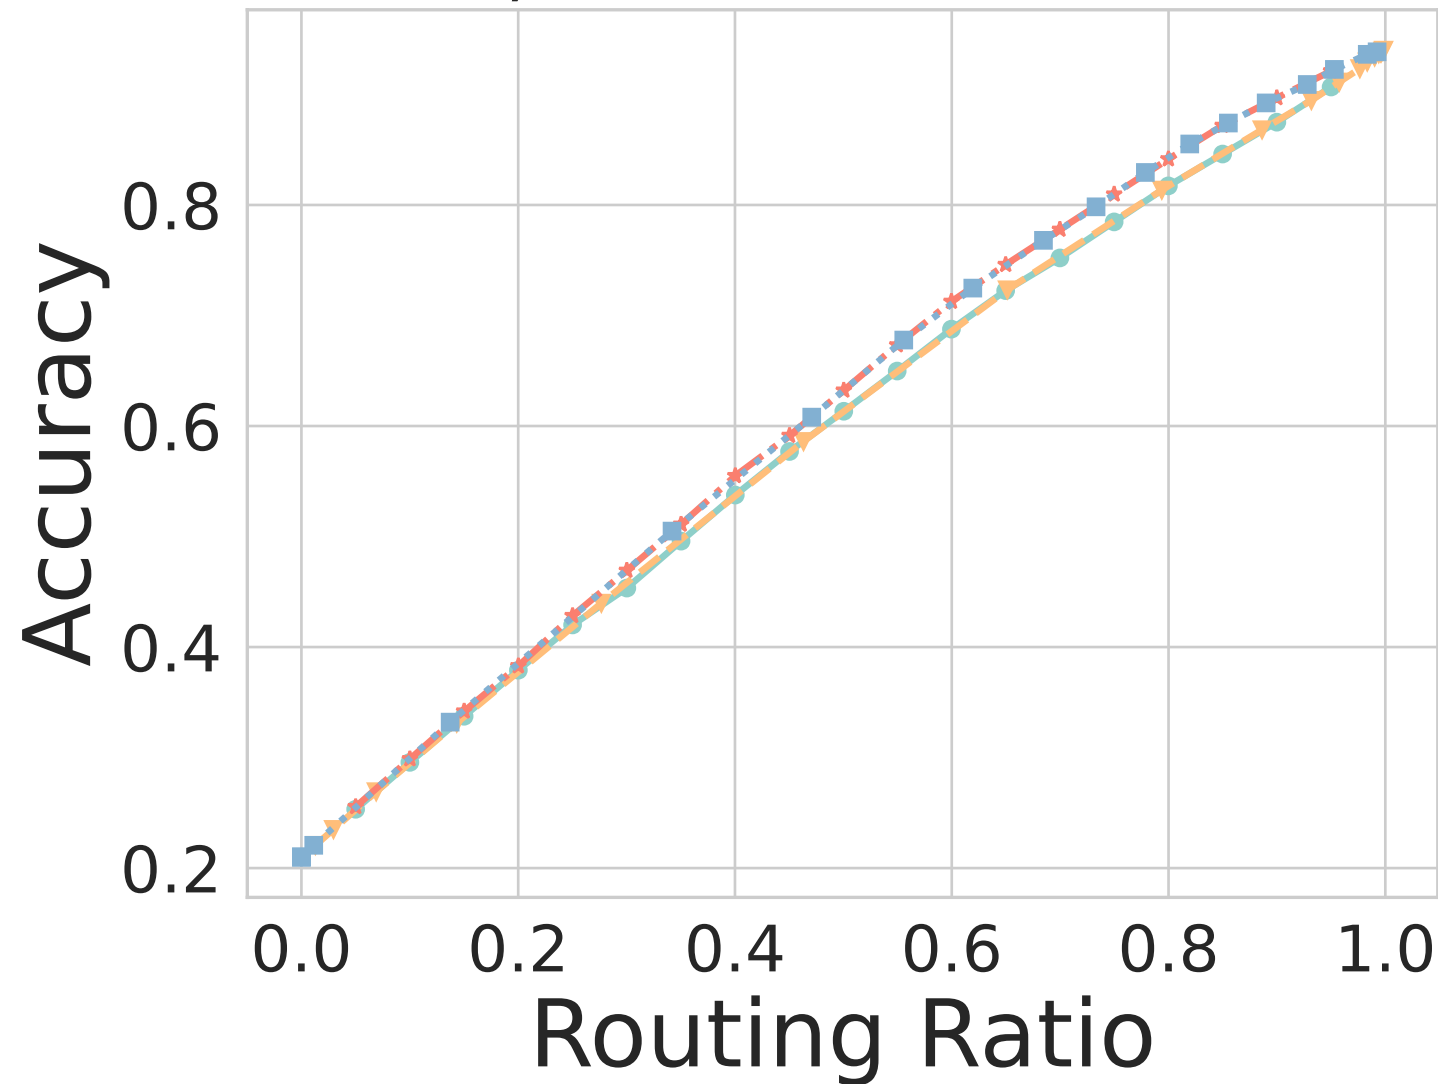

Supplement: supplementary_material [file cali_down_gsm8k_mistral-7b_meta-llama_Llama-3.1-70B-Instruct.pdf › Routing_SLM_LLMs/Proxy_routing_prediction/to_meta-llama_Llama-3.1-70B-Instruct/gsm8k_as_downstream/cali_down_gsm8k_mistral-7b_meta-llama_Llama-3.1-70B-Instruct.pdf]

**GSM8K, phi-3.5-mini to Llama-3.1-70B**

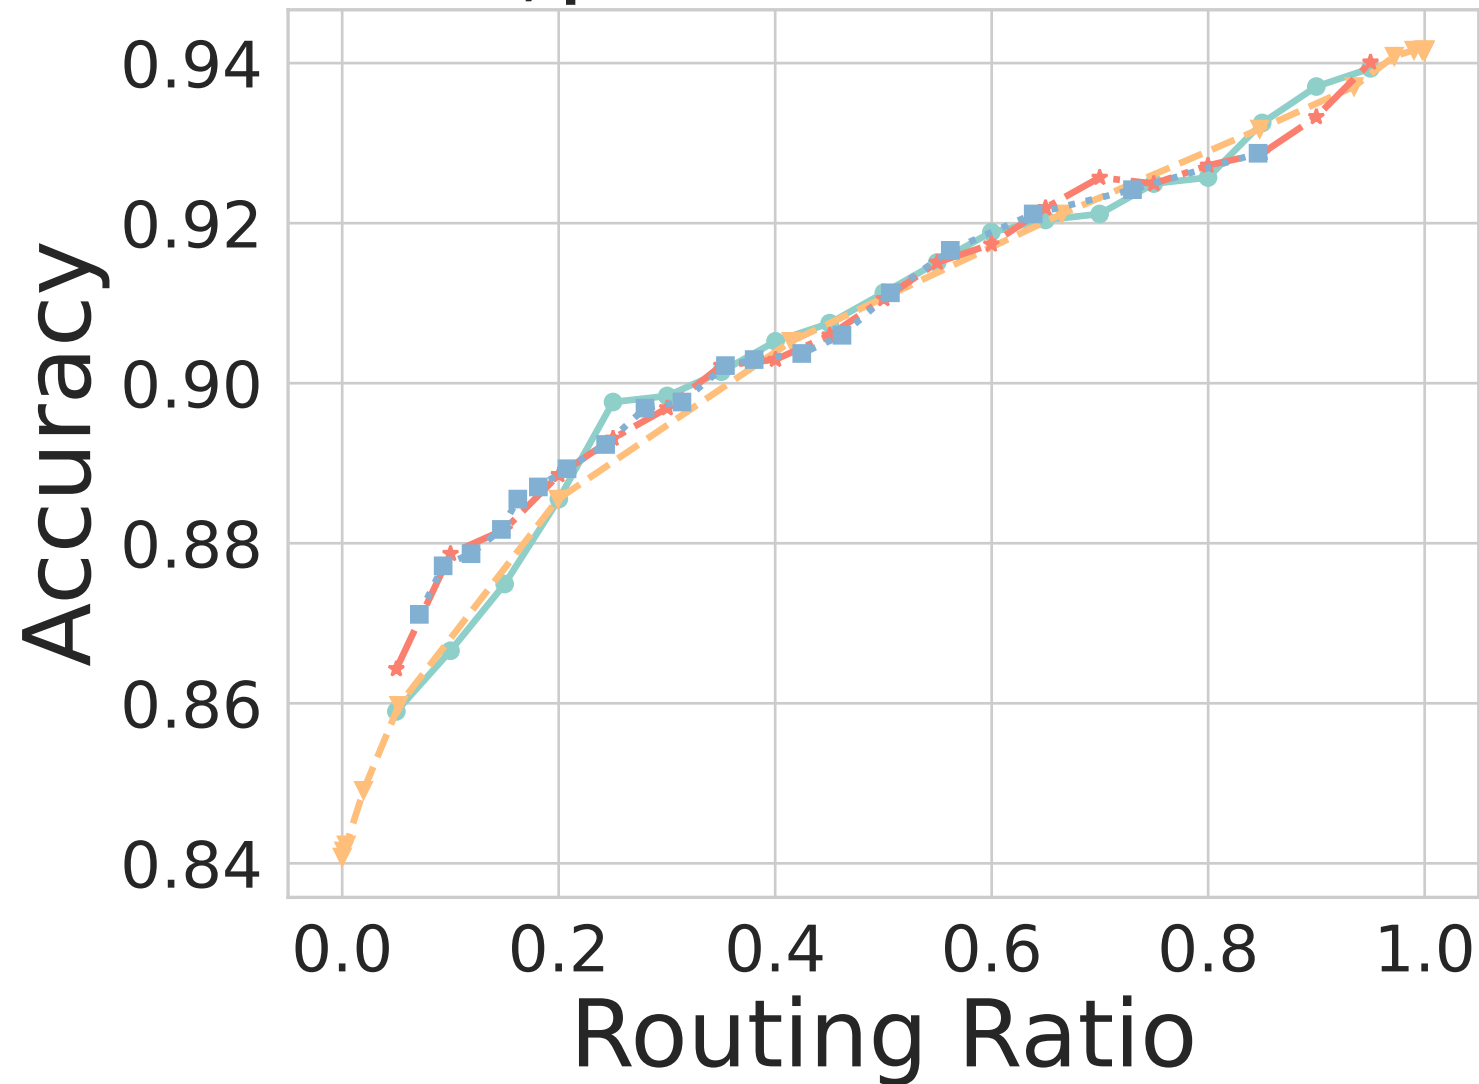

Supplement: supplementary_material [file cali_down_gsm8k_phi-3.5-mini_meta-llama_Llama-3.1-70B-Instruct.pdf › Routing_SLM_LLMs/Proxy_routing_prediction/to_meta-llama_Llama-3.1-70B-Instruct/gsm8k_as_downstream/cali_down_gsm8k_phi-3.5-mini_meta-llama_Llama-3.1-70B-Instruct.pdf]

# GSM8K, phi-4-mini-reasoning to Llama-3.1-70B

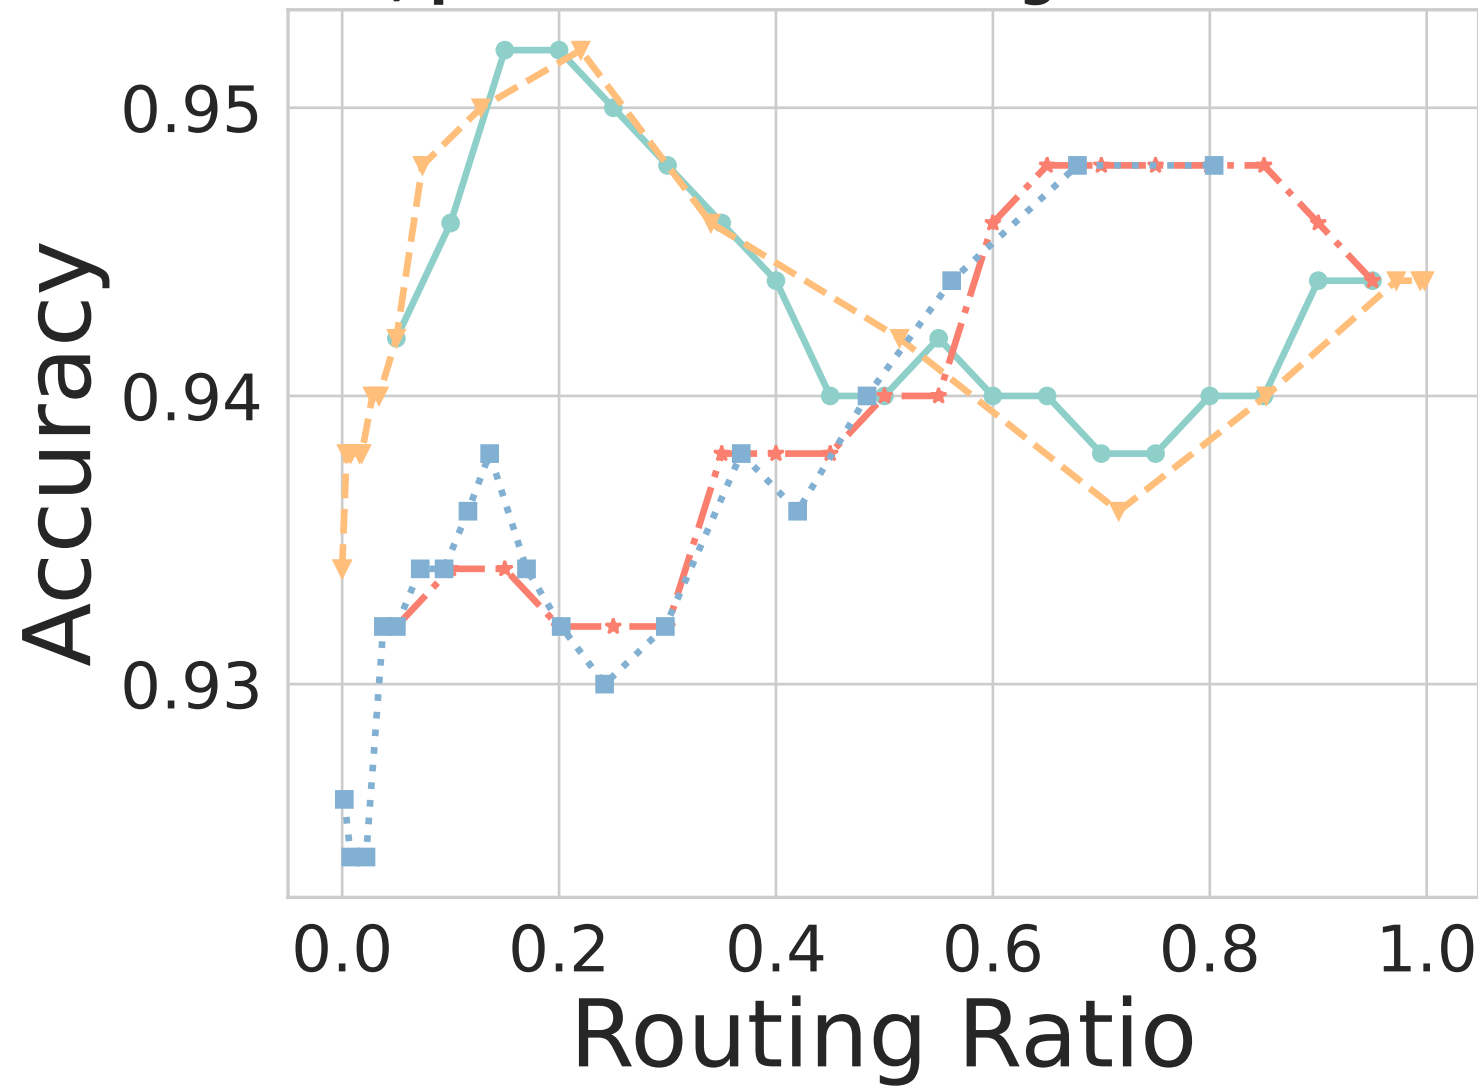

Supplement: supplementary_material [file cali_down_gsm8k_phi-4-mini-reasoning_meta-llama_Llama-3.1-70B-Instruct.pdf › Routing_SLM_LLMs/Proxy_routing_prediction/to_meta-llama_Llama-3.1-70B-Instruct/gsm8k_as_downstream/cali_down_gsm8k_phi-4-mini-reasoning_meta-llama_Llama-3.1-70B-Instruct.pdf]

**GSM8K, qwen-2.5-7b to Llama-3.1-70B**

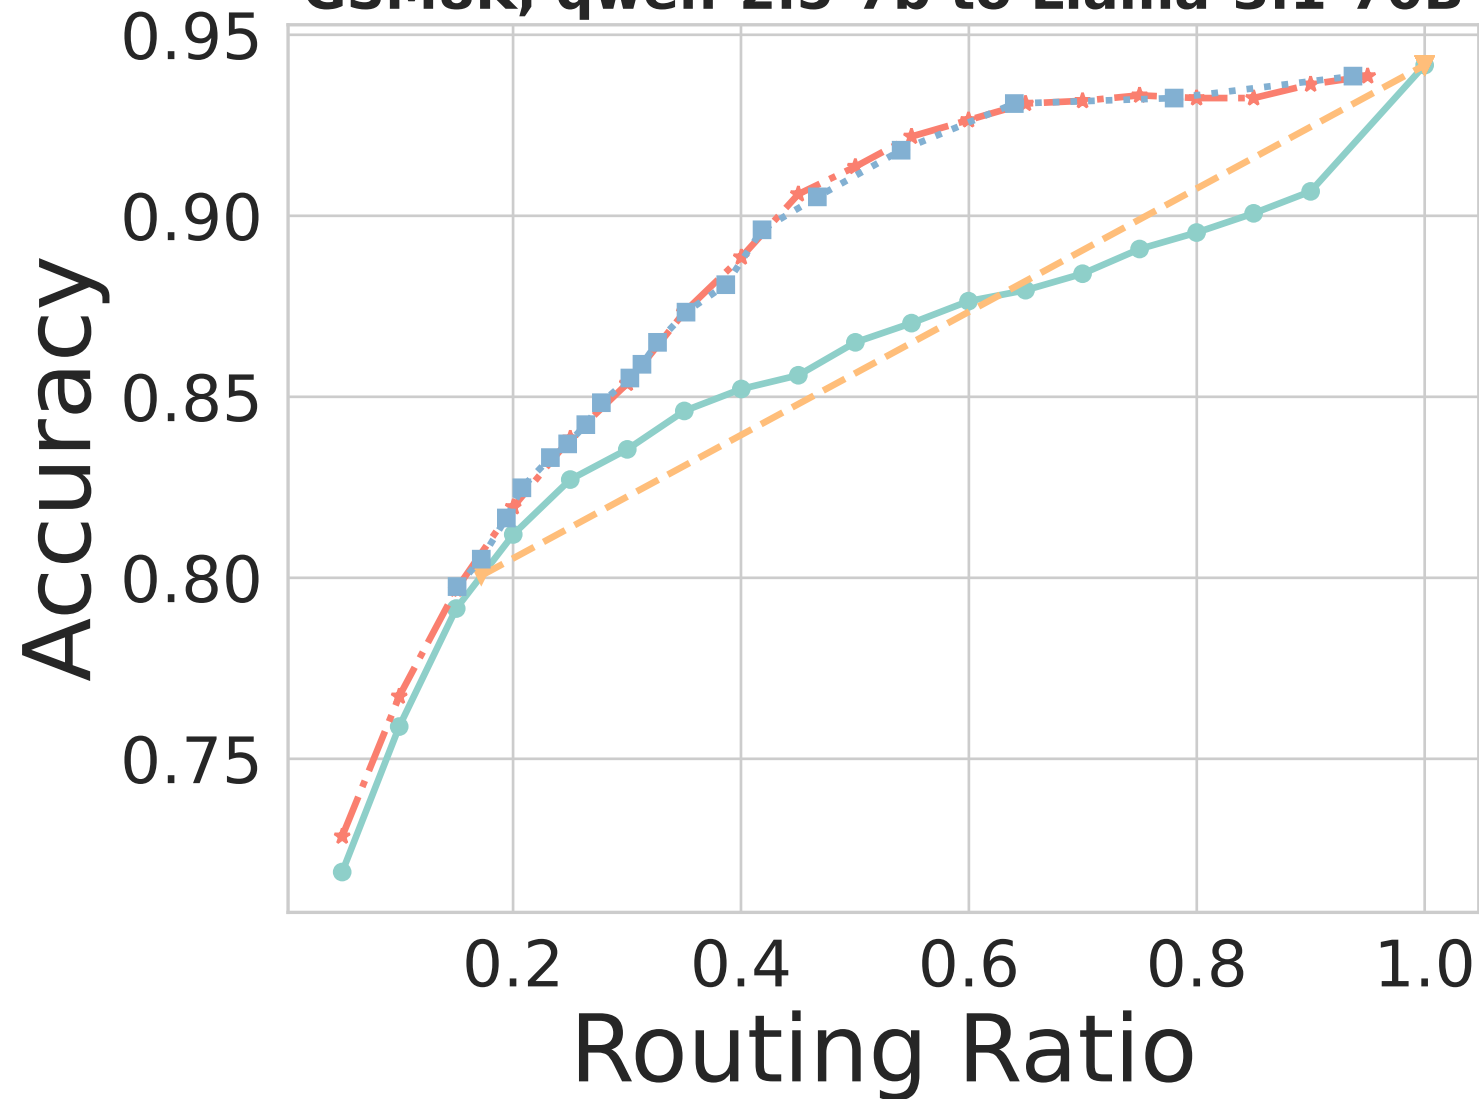

Supplement: supplementary_material [file cali_down_gsm8k_qwen-2.5-7b_meta-llama_Llama-3.1-70B-Instruct.pdf › Routing_SLM_LLMs/Proxy_routing_prediction/to_meta-llama_Llama-3.1-70B-Instruct/gsm8k_as_downstream/cali_down_gsm8k_qwen-2.5-7b_meta-llama_Llama-3.1-70B-Instruct.pdf]

**GSM8K, rwkv to Llama-3.1-70B**

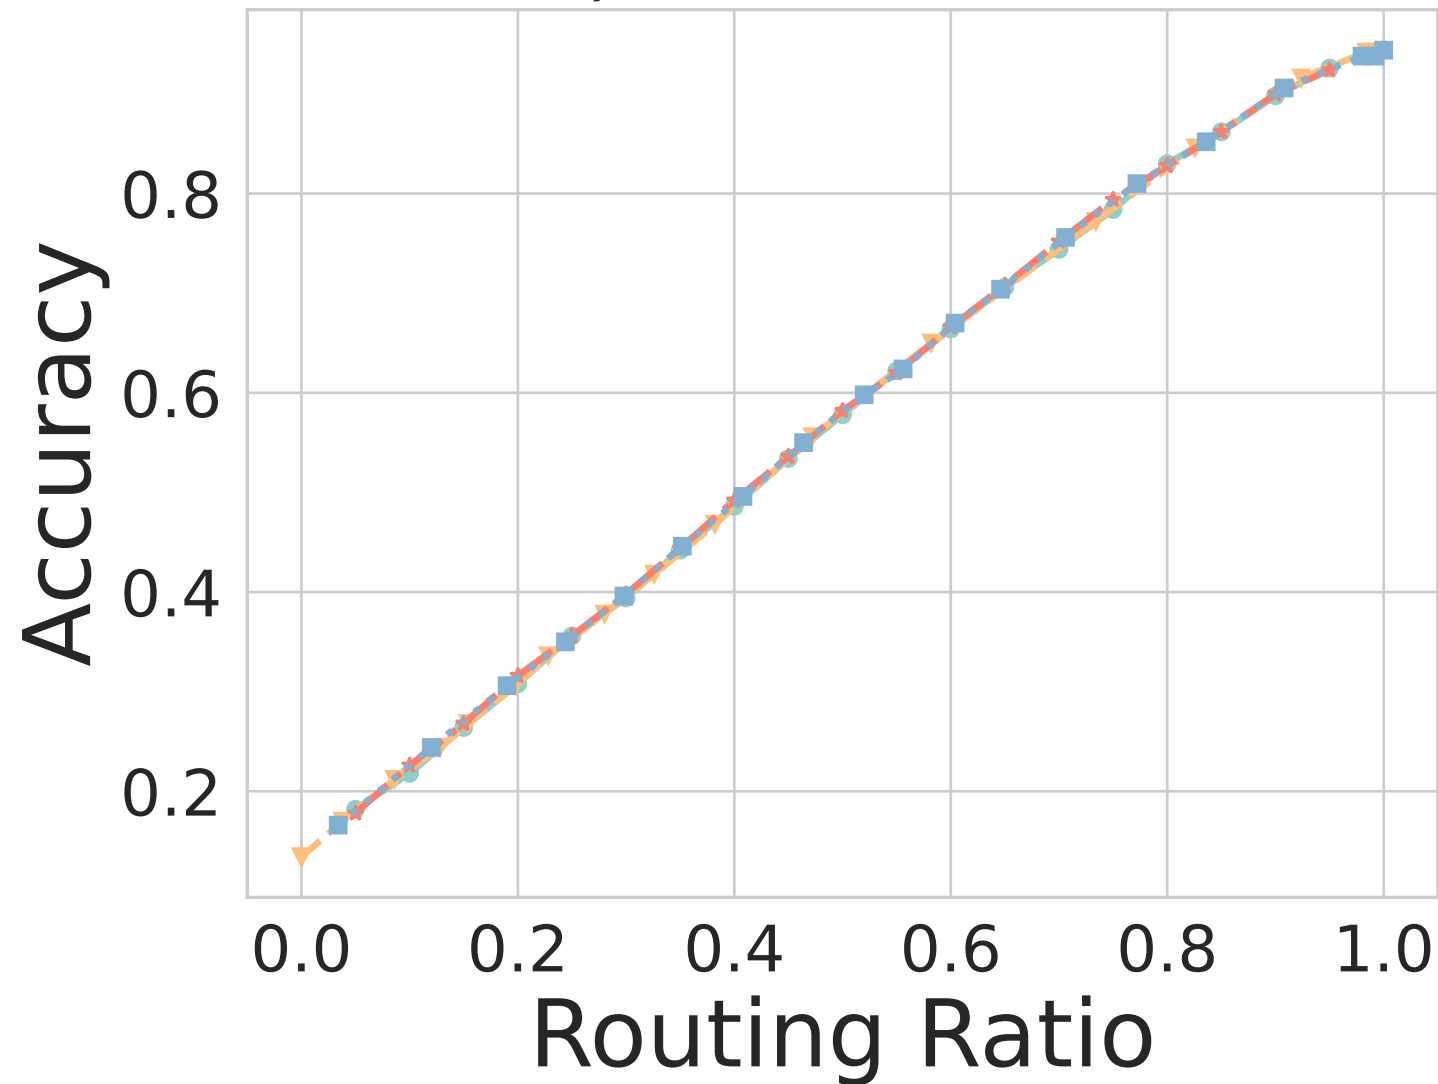

Supplement: supplementary_material [file cali_down_gsm8k_rwkv_meta-llama_Llama-3.1-70B-Instruct.pdf › Routing_SLM_LLMs/Proxy_routing_prediction/to_meta-llama_Llama-3.1-70B-Instruct/gsm8k_as_downstream/cali_down_gsm8k_rwkv_meta-llama_Llama-3.1-70B-Instruct.pdf]
