# Supplementary material (part 8 of 14)
Source: ML conference proceedings conference paper supplement (https://openreview.net/forum?id=smdbra3VEi)

**TruthfulQA, llama-3.1-8b to Llama-3.1-70B**

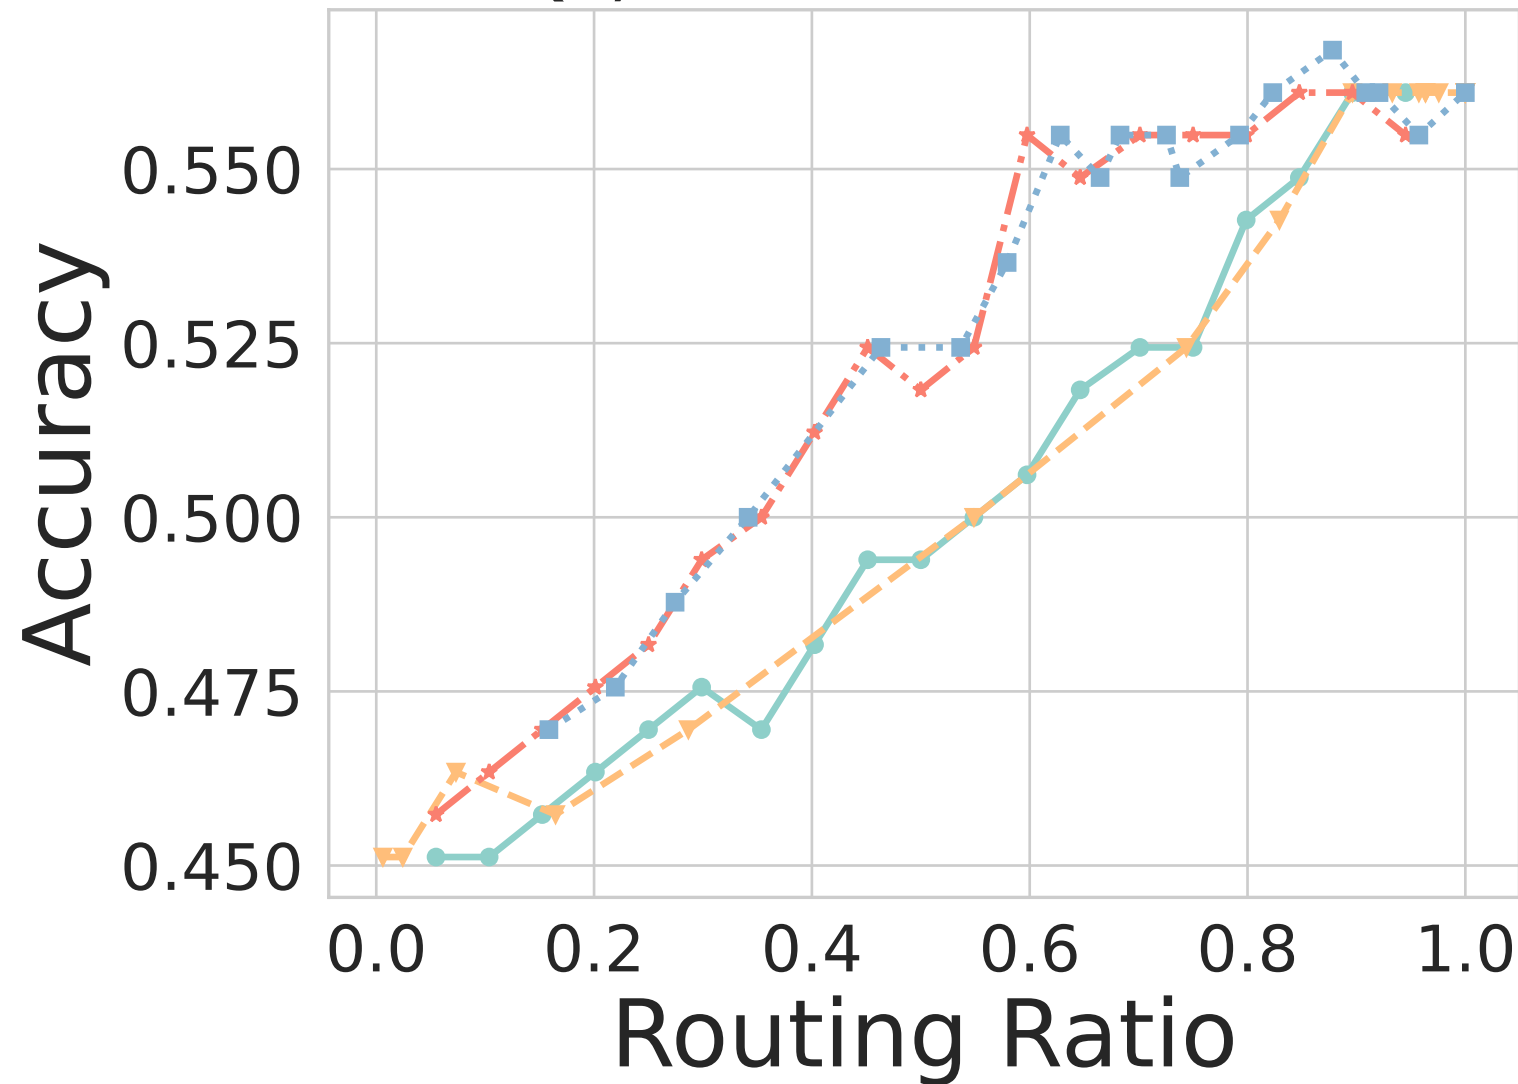

Supplement: supplementary_material [file cali_down_truthful_qa_llama-3.1-8b_meta-llama_Llama-3.1-70B-Instruct.pdf › Routing_SLM_LLMs/Proxy_routing_prediction/to_meta-llama_Llama-3.1-70B-Instruct/truthful_qa_as_downstream/cali_down_truthful_qa_llama-3.1-8b_meta-llama_Llama-3.1-70B-Instruct.pdf]

**TruthfulQA, llama-3.2-1b to Llama-3.1-70B**

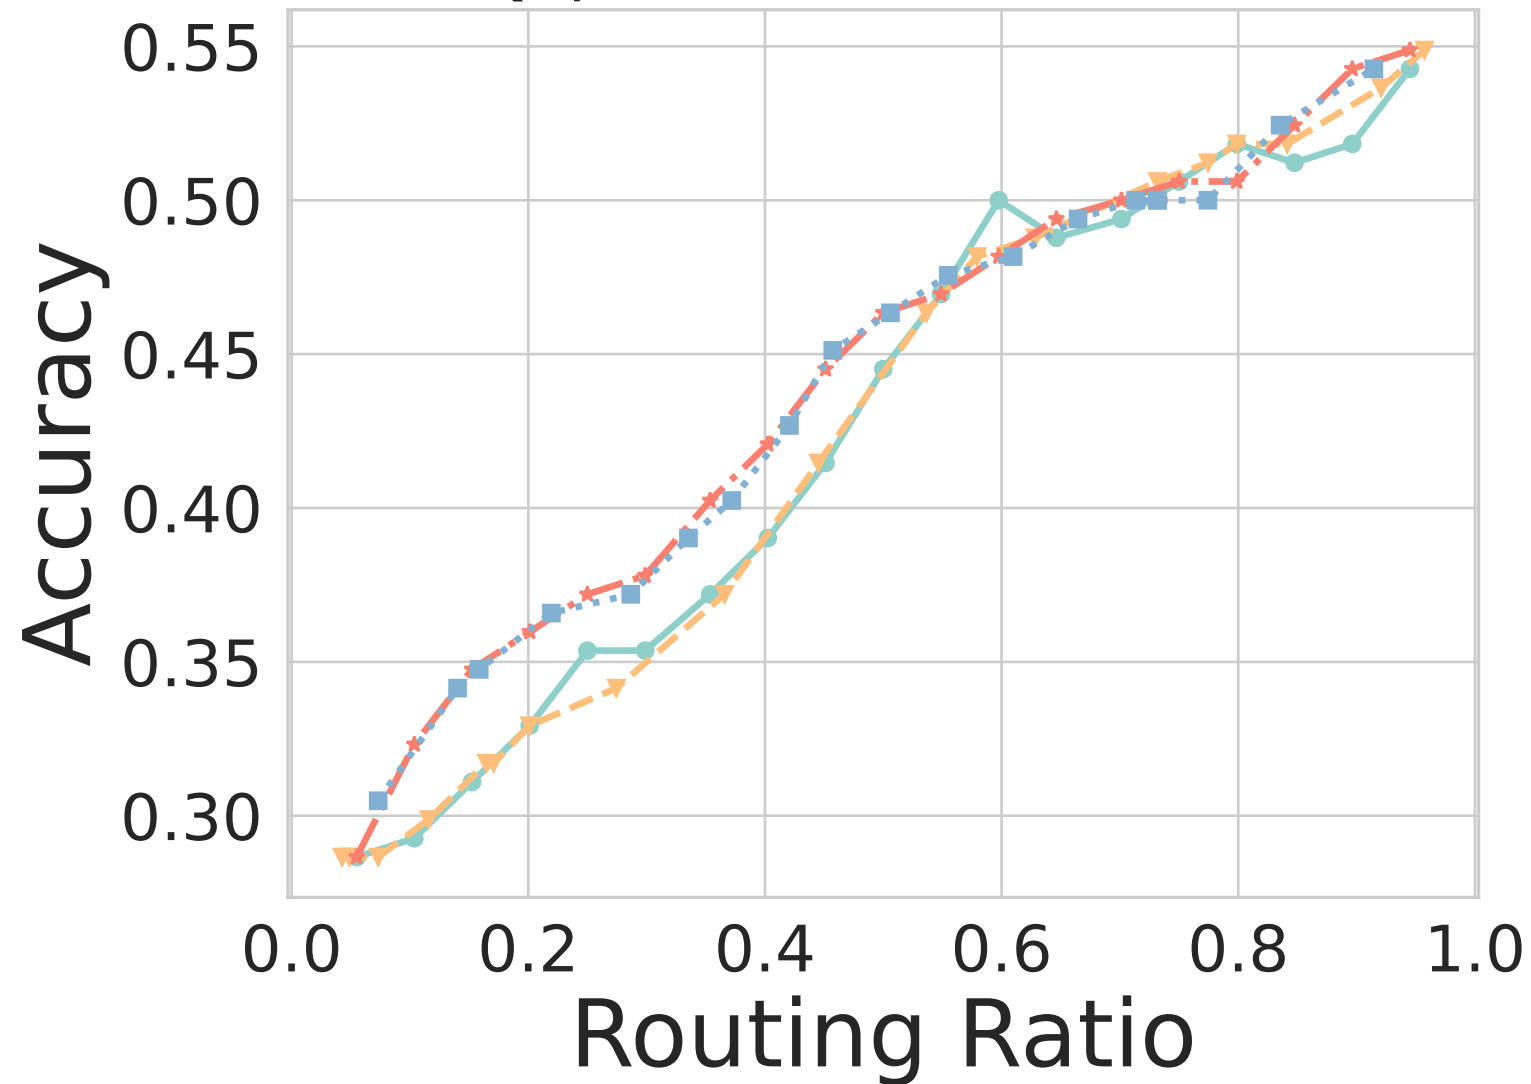

Supplement: supplementary_material [file cali_down_truthful_qa_llama-3.2-1b_meta-llama_Llama-3.1-70B-Instruct.pdf › Routing_SLM_LLMs/Proxy_routing_prediction/to_meta-llama_Llama-3.1-70B-Instruct/truthful_qa_as_downstream/cali_down_truthful_qa_llama-3.2-1b_meta-llama_Llama-3.1-70B-Instruct.pdf]

**TruthfulQA, llama-3.2-3b to Llama-3.1-70B**

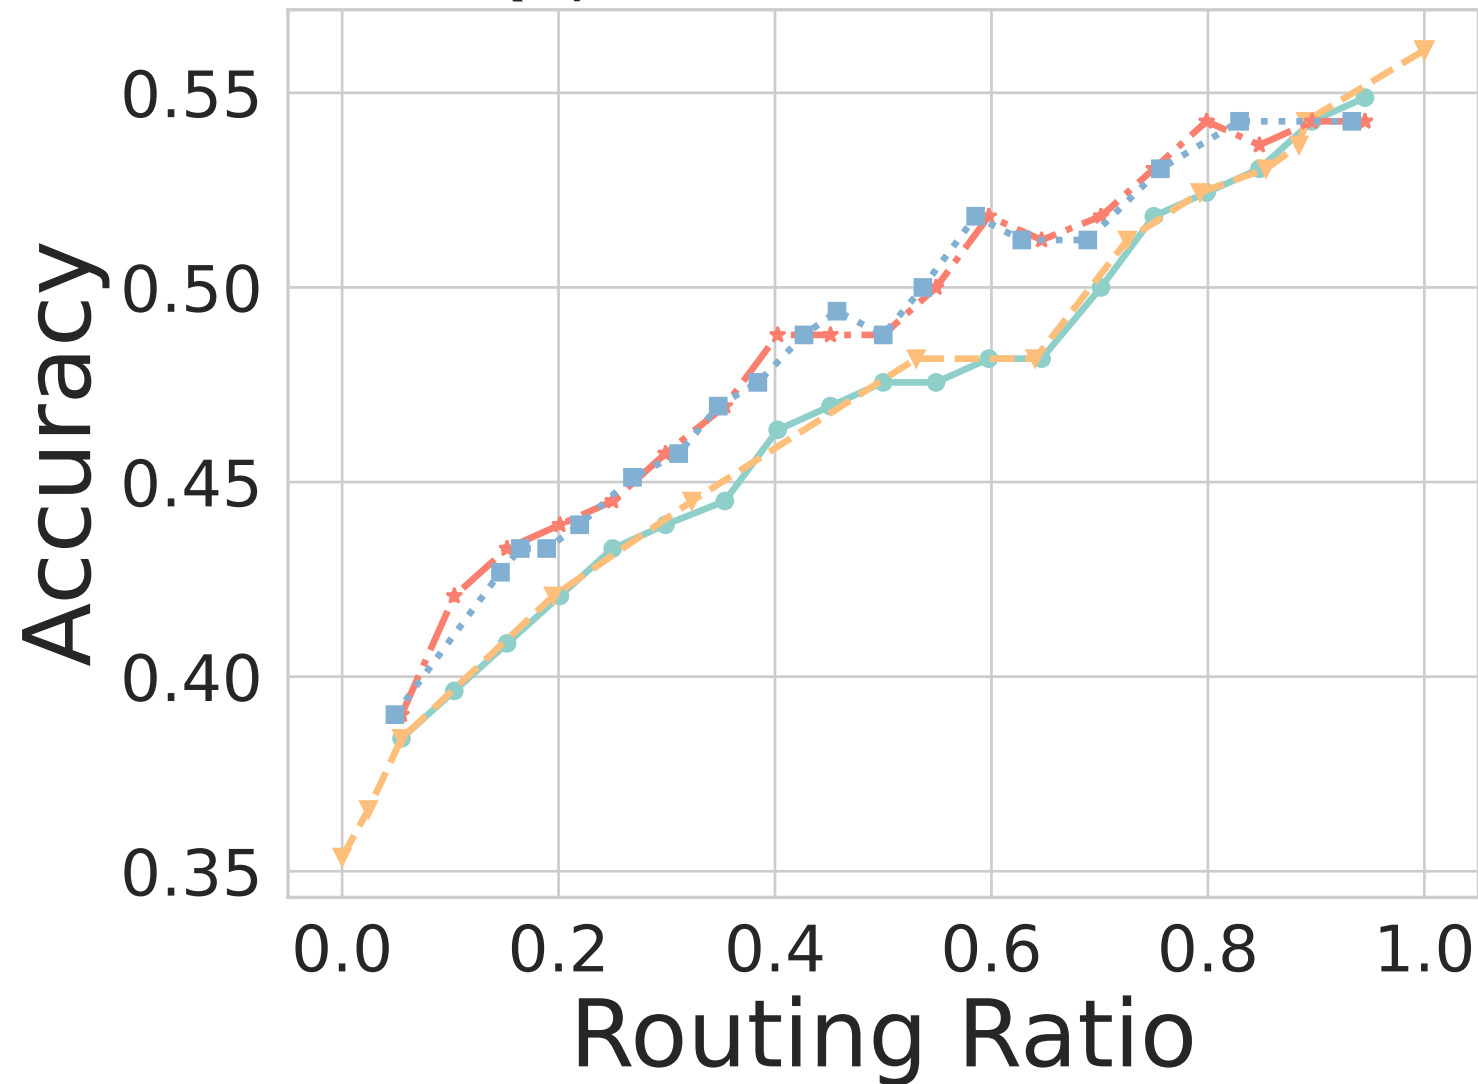

Supplement: supplementary_material [file cali_down_truthful_qa_llama-3.2-3b_meta-llama_Llama-3.1-70B-Instruct.pdf › Routing_SLM_LLMs/Proxy_routing_prediction/to_meta-llama_Llama-3.1-70B-Instruct/truthful_qa_as_downstream/cali_down_truthful_qa_llama-3.2-3b_meta-llama_Llama-3.1-70B-Instruct.pdf]

**TruthfulQA, mistral-7b to Llama-3.1-70B**

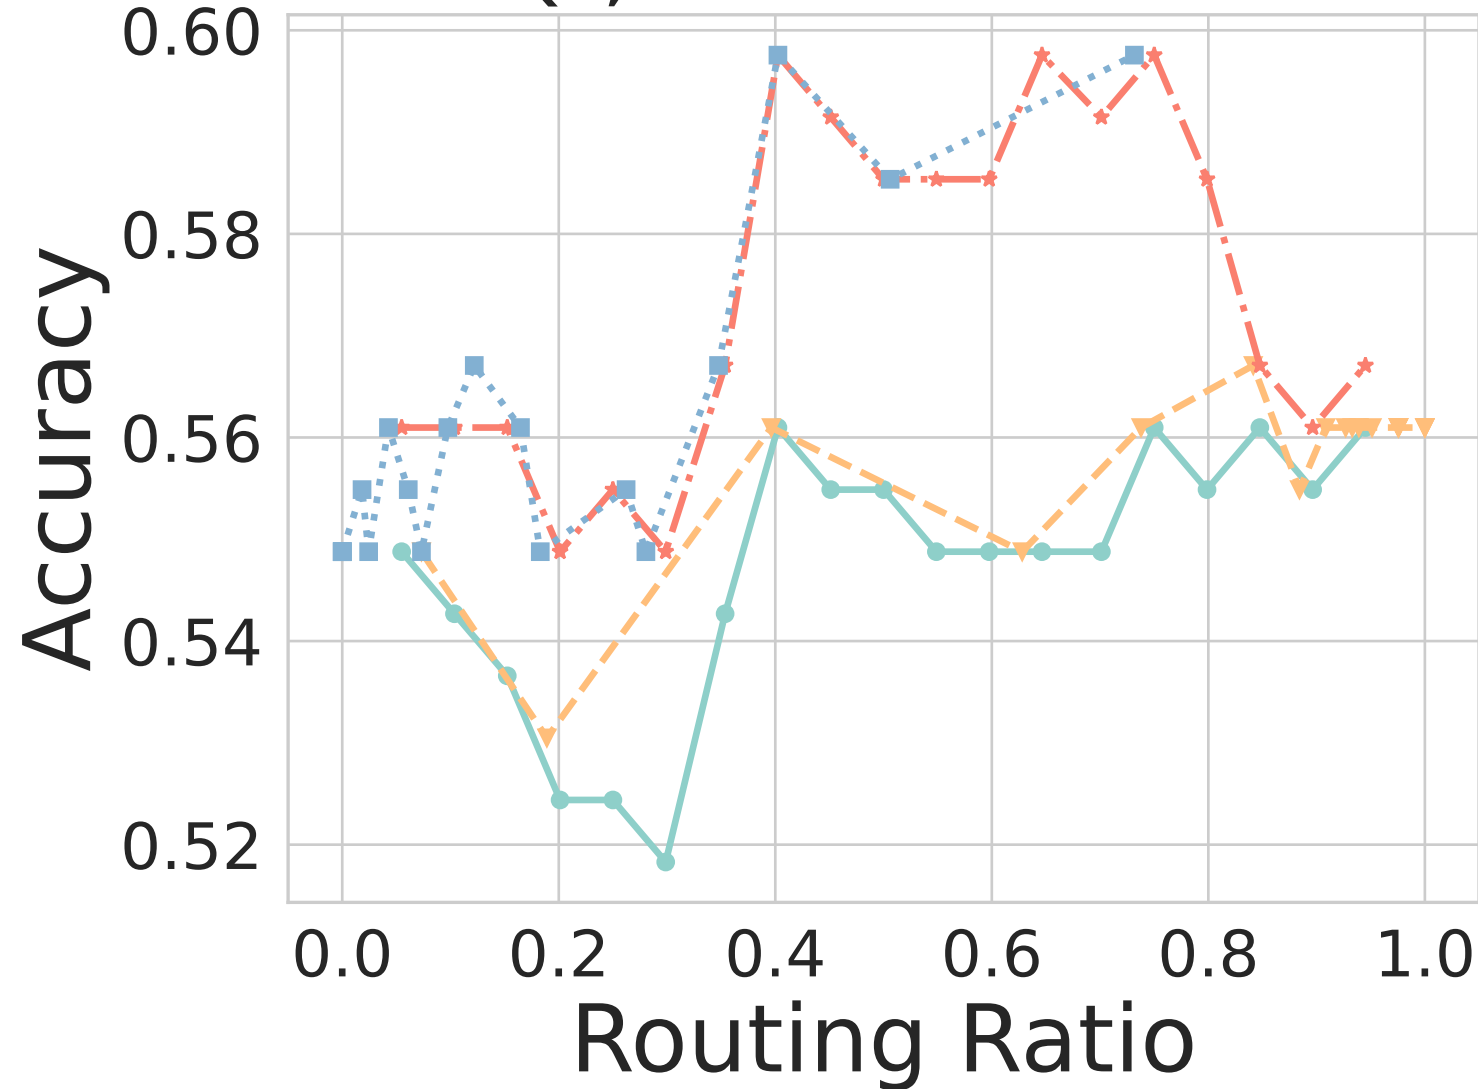

Supplement: supplementary_material [file cali_down_truthful_qa_mistral-7b_meta-llama_Llama-3.1-70B-Instruct.pdf › Routing_SLM_LLMs/Proxy_routing_prediction/to_meta-llama_Llama-3.1-70B-Instruct/truthful_qa_as_downstream/cali_down_truthful_qa_mistral-7b_meta-llama_Llama-3.1-70B-Instruct.pdf]

**TruthfulQA, phi-3.5-mini to Llama-3.1-70B**

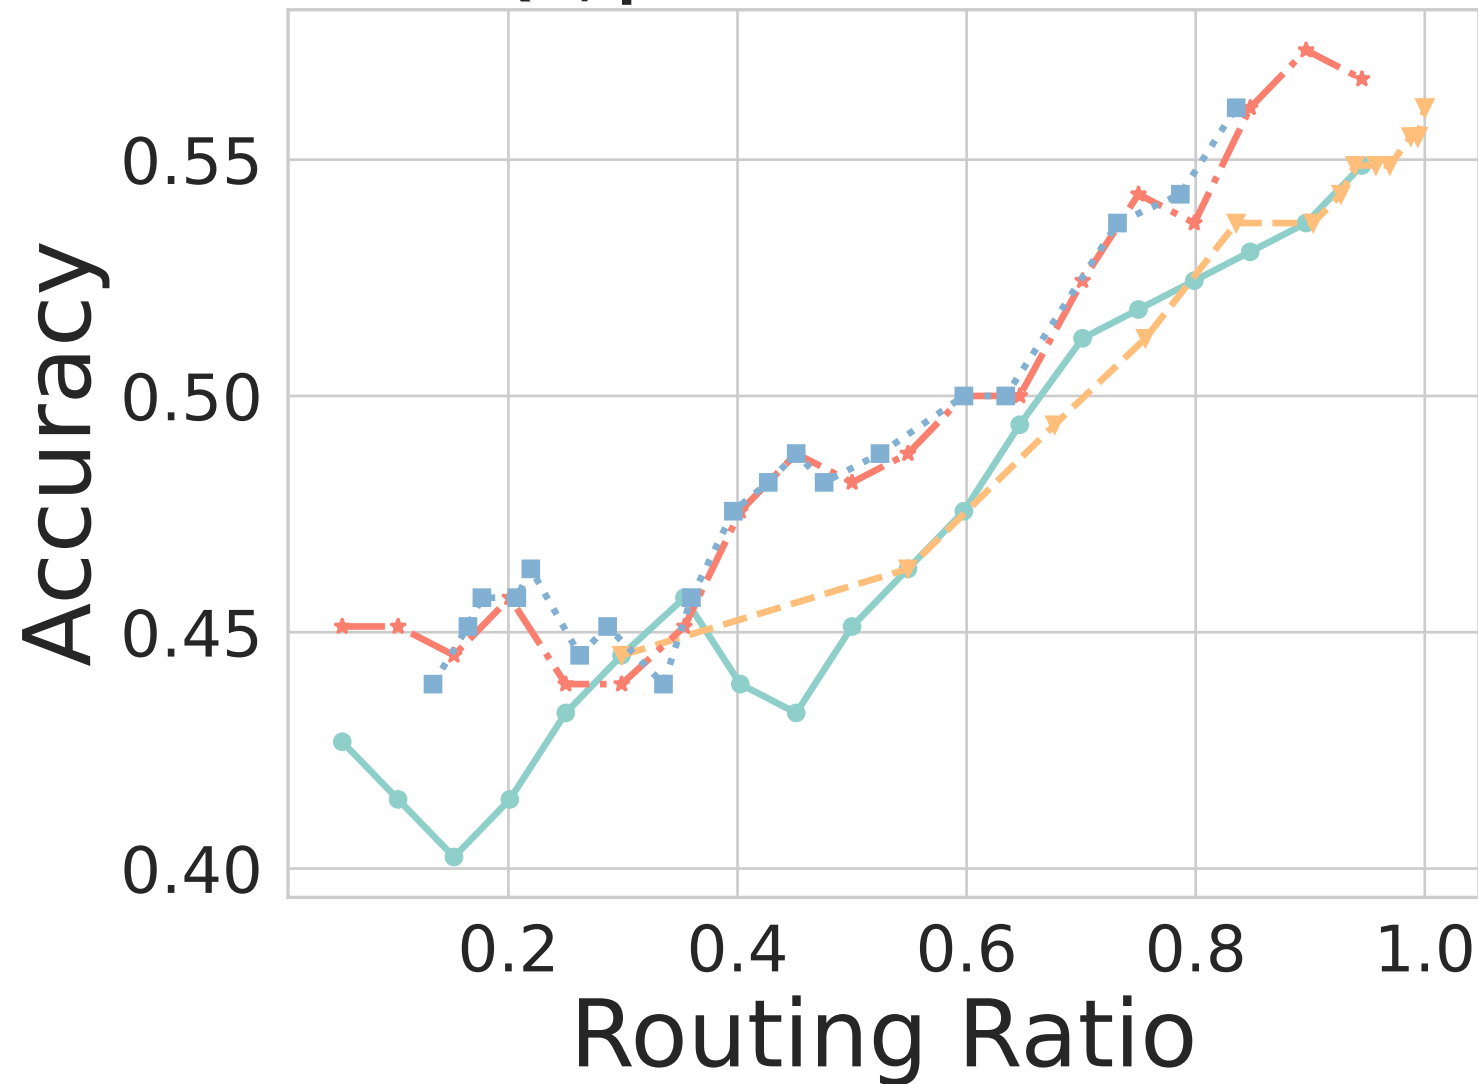

Supplement: supplementary_material [file cali_down_truthful_qa_phi-3.5-mini_meta-llama_Llama-3.1-70B-Instruct.pdf › Routing_SLM_LLMs/Proxy_routing_prediction/to_meta-llama_Llama-3.1-70B-Instruct/truthful_qa_as_downstream/cali_down_truthful_qa_phi-3.5-mini_meta-llama_Llama-3.1-70B-Instruct.pdf]

# TruthfulQA, phi-4-mini-reasoning to Llama-3.1-70B

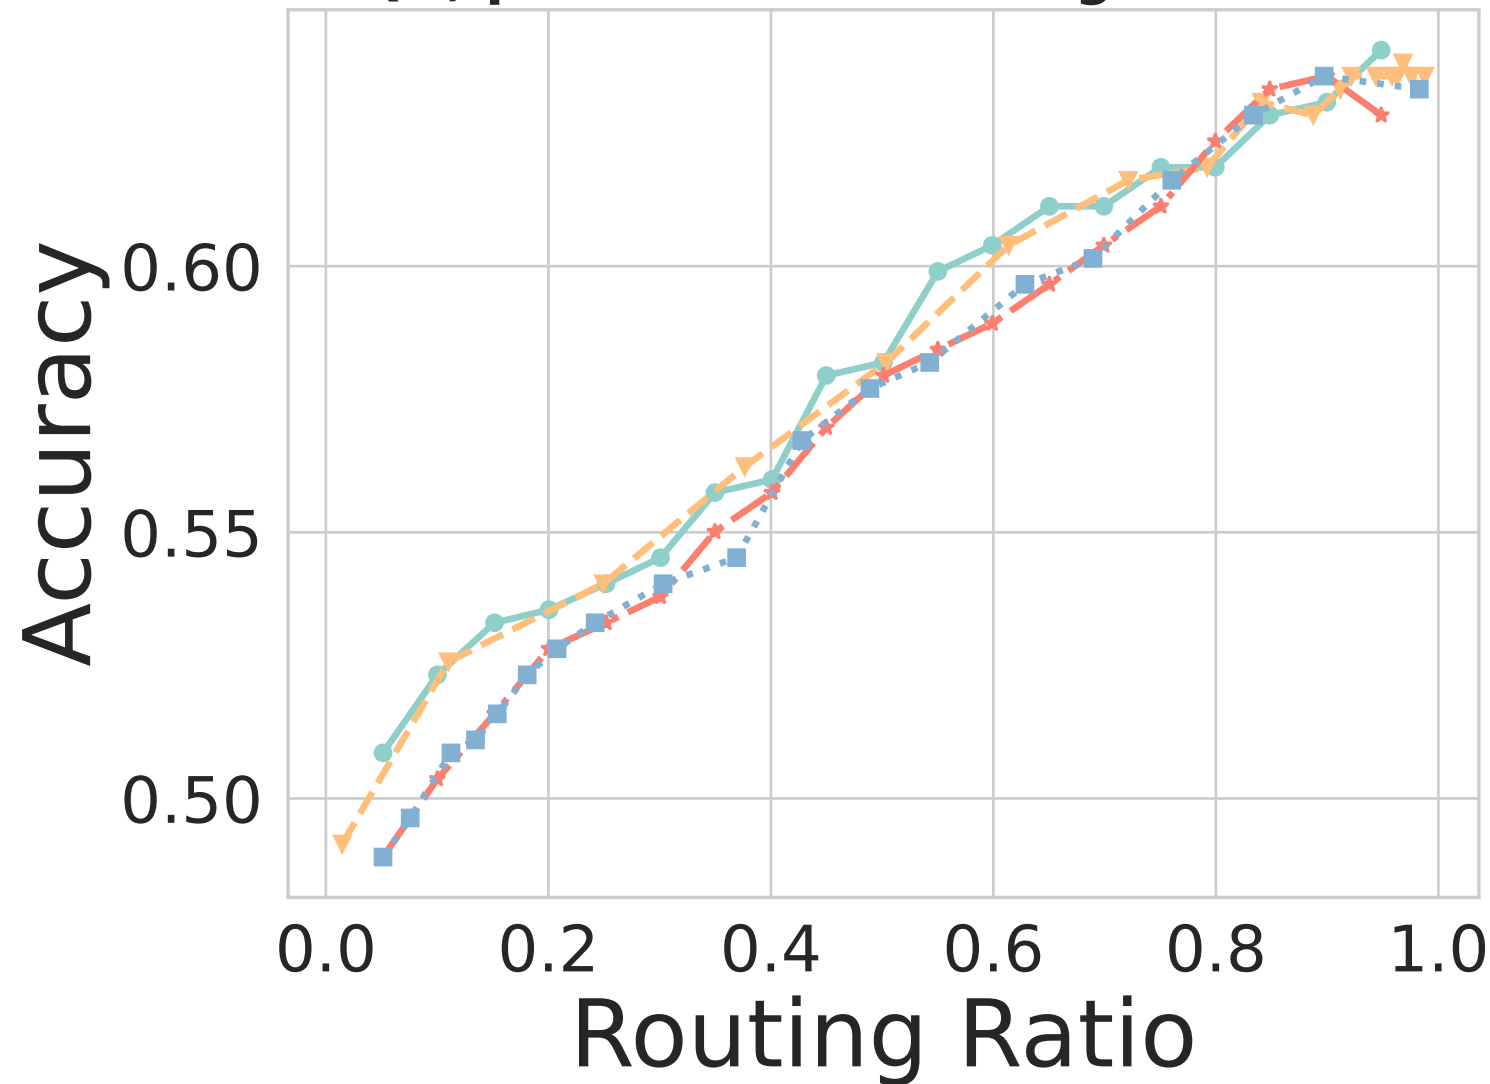

Supplement: supplementary_material [file cali_down_truthful_qa_phi-4-mini-reasoning_meta-llama_Llama-3.1-70B-Instruct.pdf › Routing_SLM_LLMs/Proxy_routing_prediction/to_meta-llama_Llama-3.1-70B-Instruct/truthful_qa_as_downstream/cali_down_truthful_qa_phi-4-mini-reasoning_meta-llama_Llama-3.1-70B-Instruct.pdf]

**TruthfulQA, qwen-2.5-7b to Llama-3.1-70B**

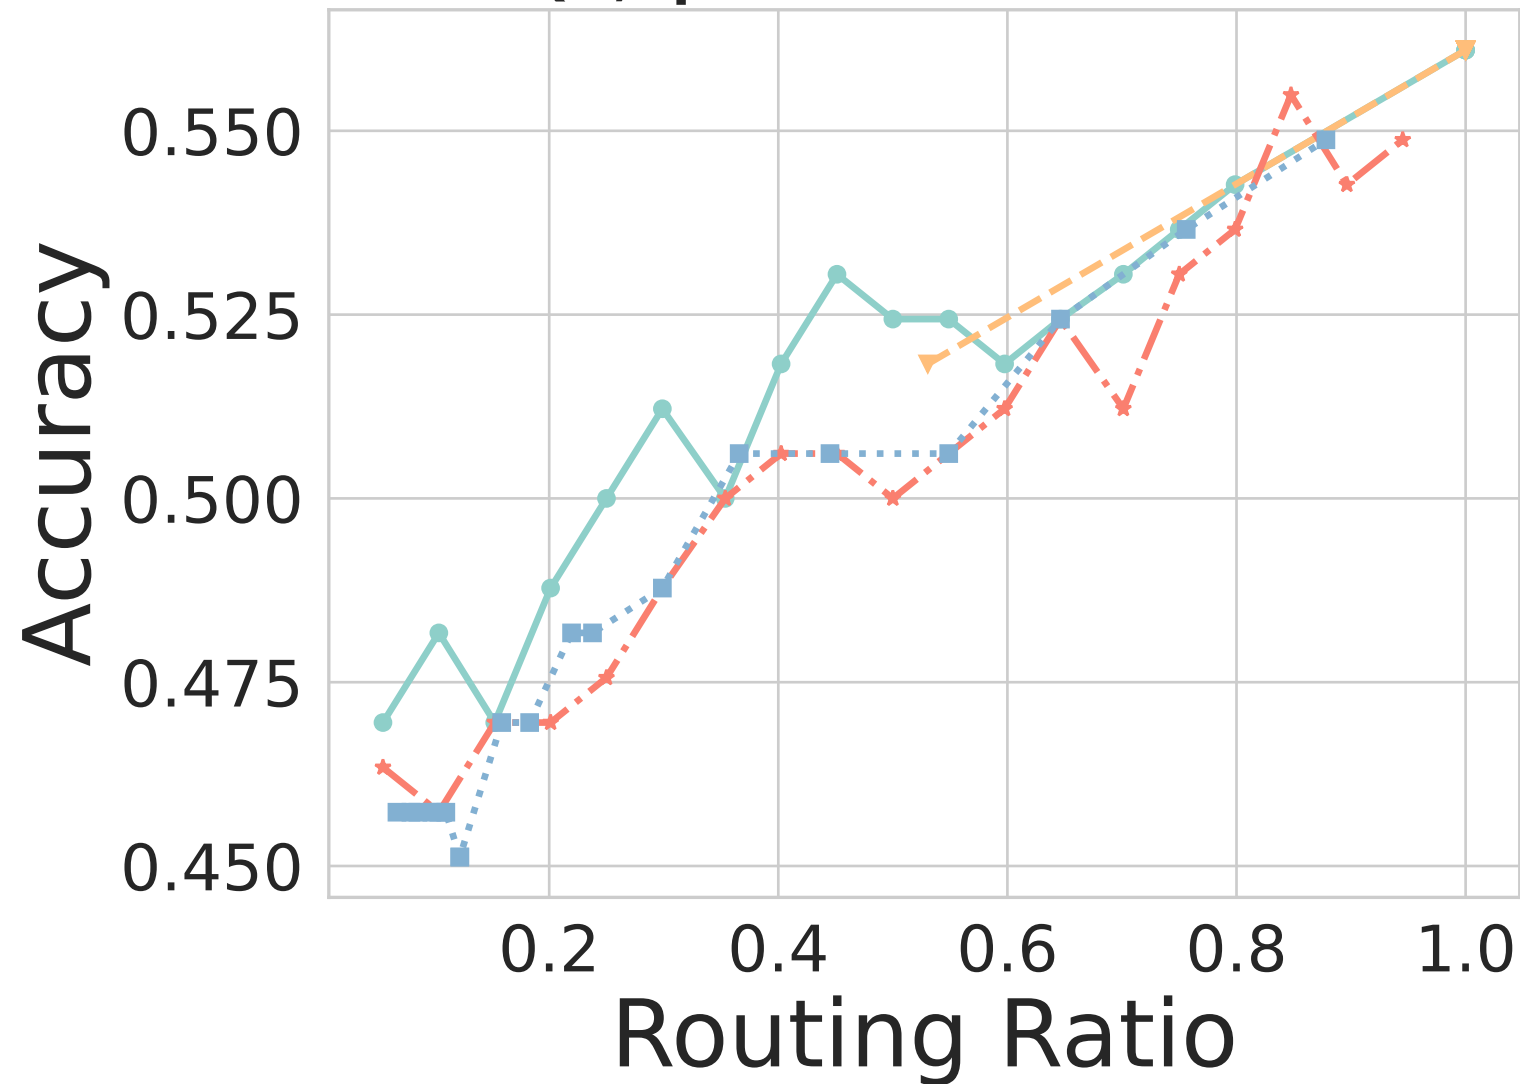

Supplement: supplementary_material [file cali_down_truthful_qa_qwen-2.5-7b_meta-llama_Llama-3.1-70B-Instruct.pdf › Routing_SLM_LLMs/Proxy_routing_prediction/to_meta-llama_Llama-3.1-70B-Instruct/truthful_qa_as_downstream/cali_down_truthful_qa_qwen-2.5-7b_meta-llama_Llama-3.1-70B-Instruct.pdf]

**TruthfulQA, rwkv to Llama-3.1-70B**

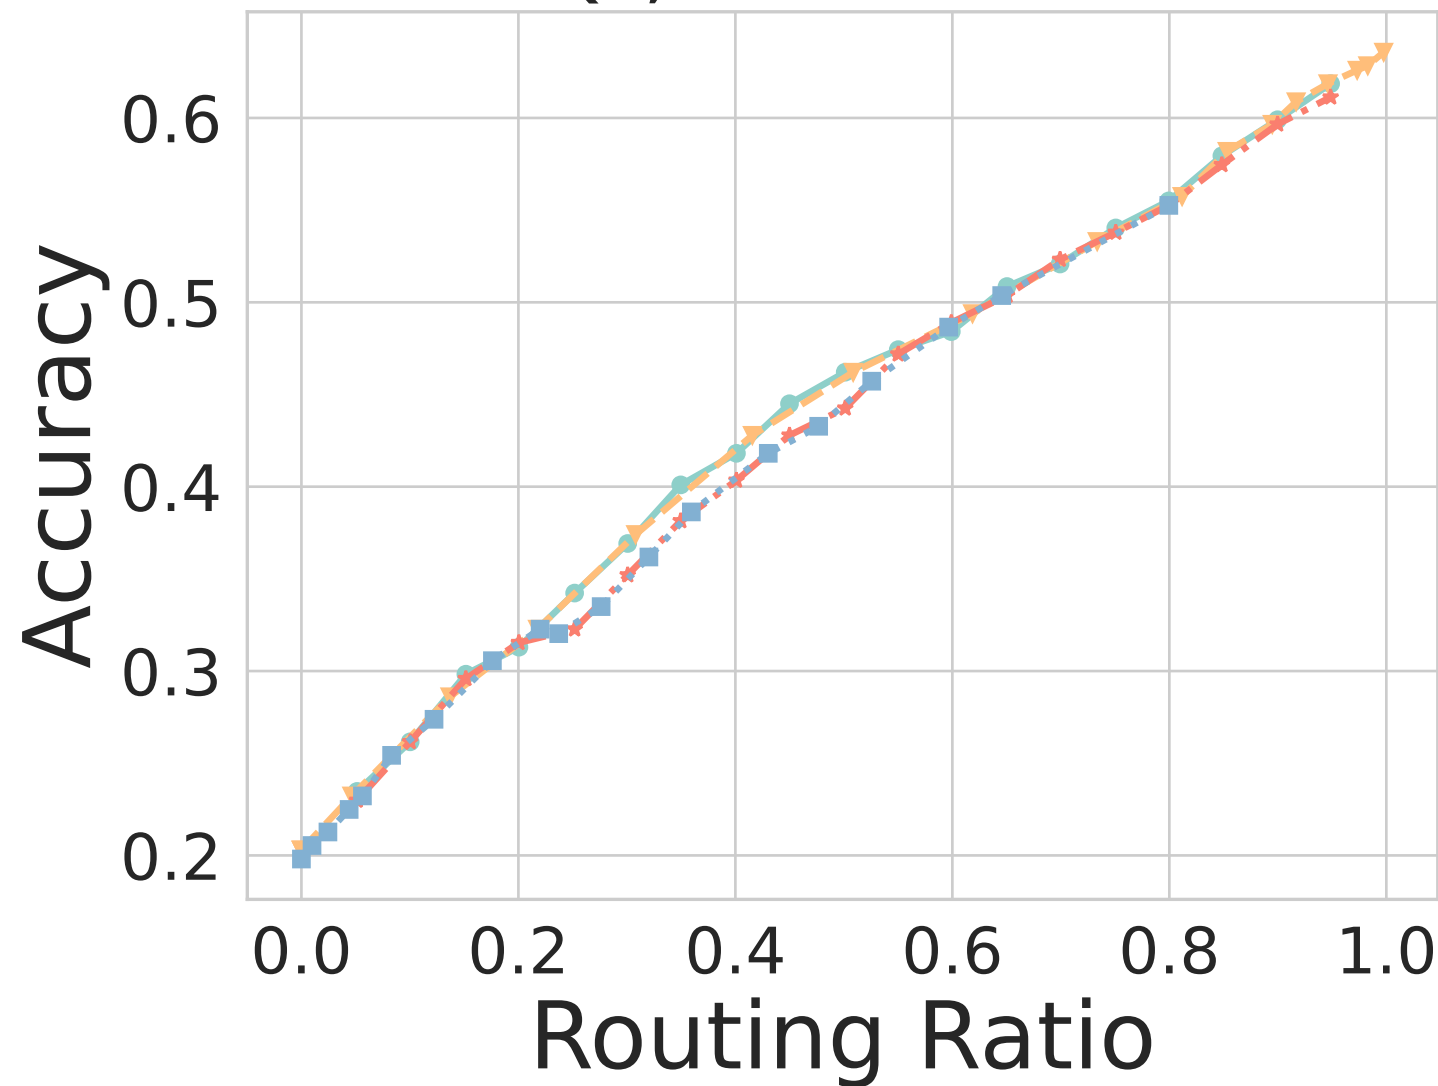

Supplement: supplementary_material [file cali_down_truthful_qa_rwkv_meta-llama_Llama-3.1-70B-Instruct.pdf › Routing_SLM_LLMs/Proxy_routing_prediction/to_meta-llama_Llama-3.1-70B-Instruct/truthful_qa_as_downstream/cali_down_truthful_qa_rwkv_meta-llama_Llama-3.1-70B-Instruct.pdf]

# WinoGrande, Qwen3-0.6B to Llama-3.1-70B

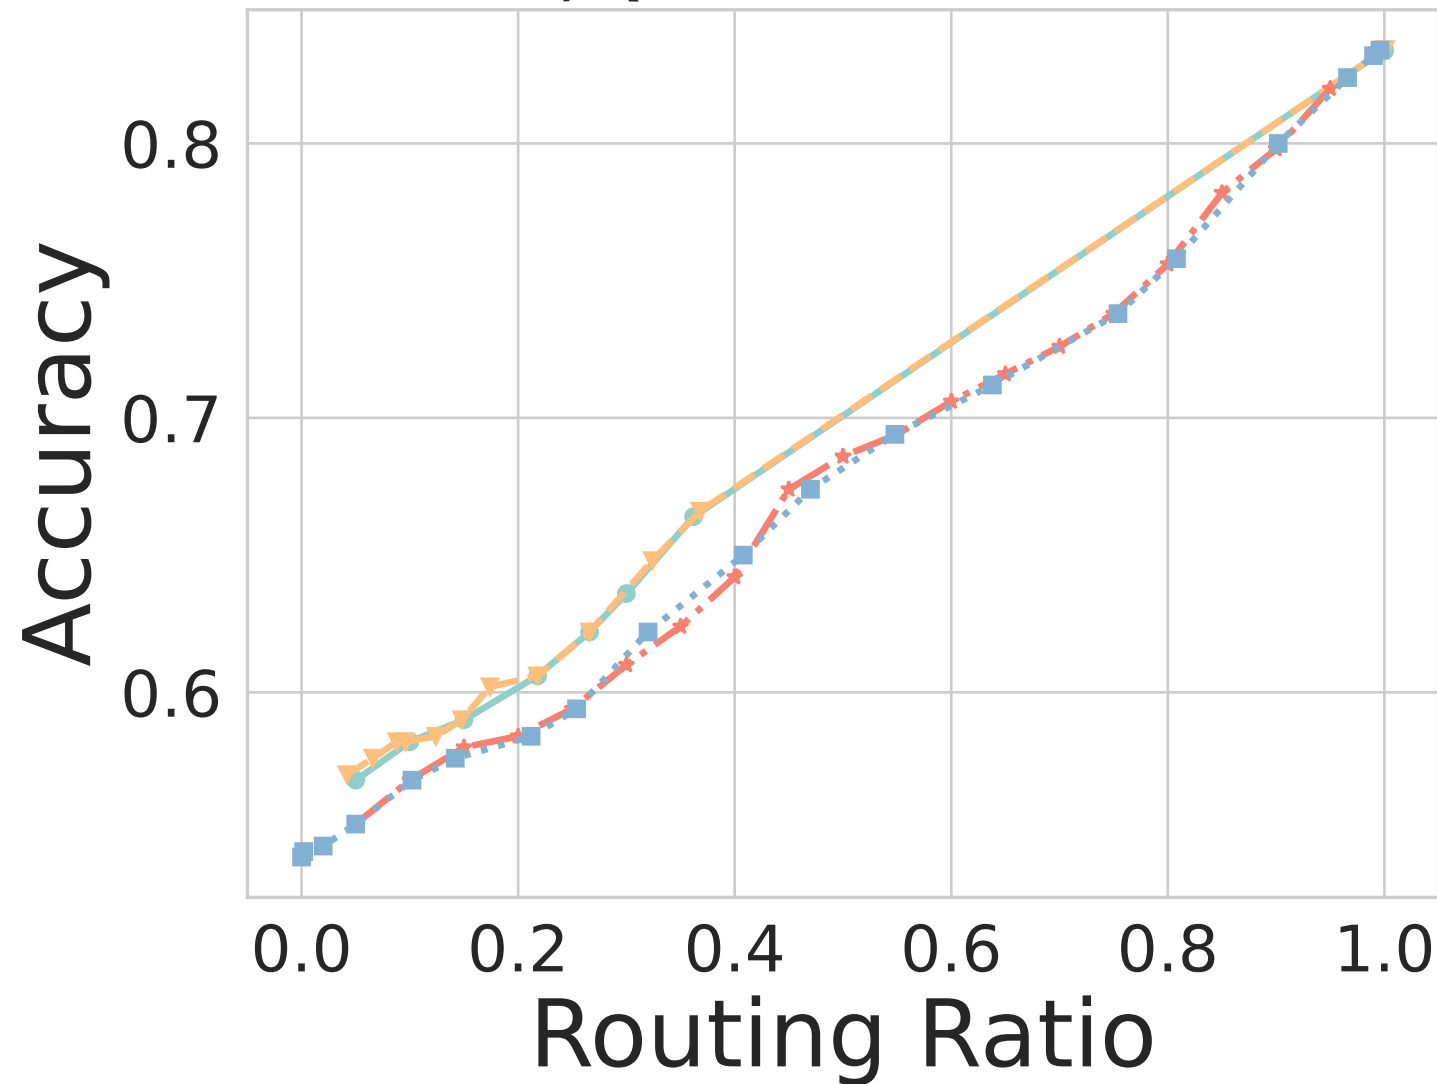

Supplement: supplementary_material [file cali_down_winogrande_Qwen3-0.6B_meta-llama_Llama-3.1-70B-Instruct.pdf › Routing_SLM_LLMs/Proxy_routing_prediction/to_meta-llama_Llama-3.1-70B-Instruct/winogrande_as_downstream/cali_down_winogrande_Qwen3-0.6B_meta-llama_Llama-3.1-70B-Instruct.pdf]

# WinoGrande, Qwen3-1.7B to Llama-3.1-70B

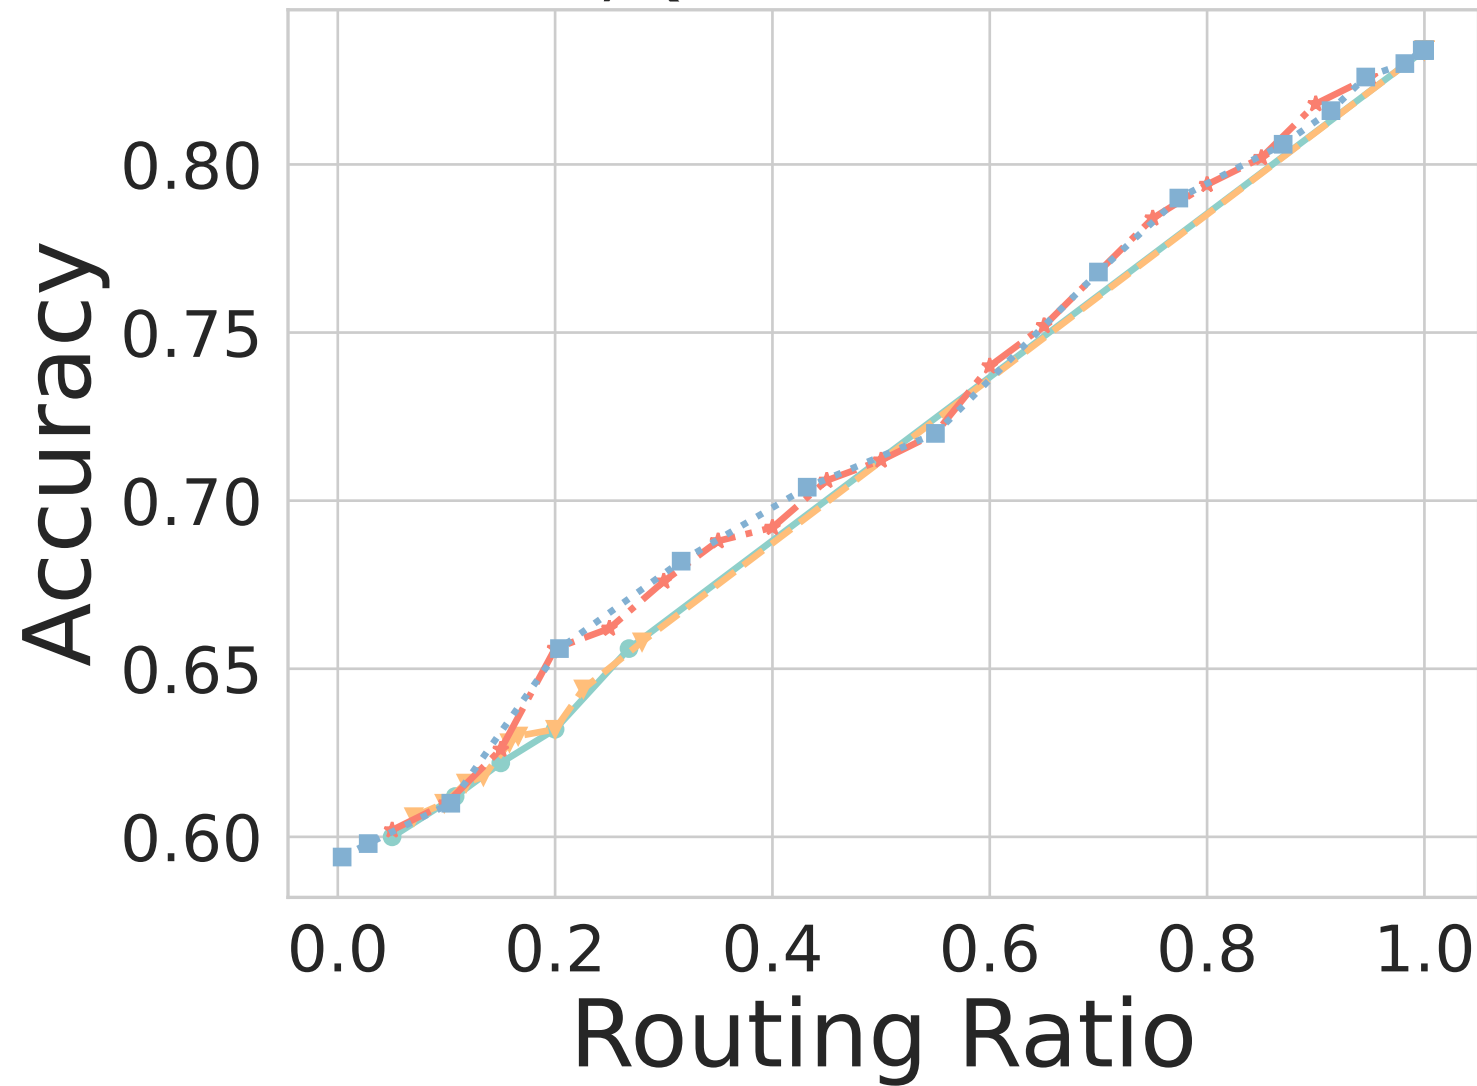

Supplement: supplementary_material [file cali_down_winogrande_Qwen3-1.7B_meta-llama_Llama-3.1-70B-Instruct.pdf › Routing_SLM_LLMs/Proxy_routing_prediction/to_meta-llama_Llama-3.1-70B-Instruct/winogrande_as_downstream/cali_down_winogrande_Qwen3-1.7B_meta-llama_Llama-3.1-70B-Instruct.pdf]

# WinoGrande, Qwen3-4B to Llama-3.1-70B

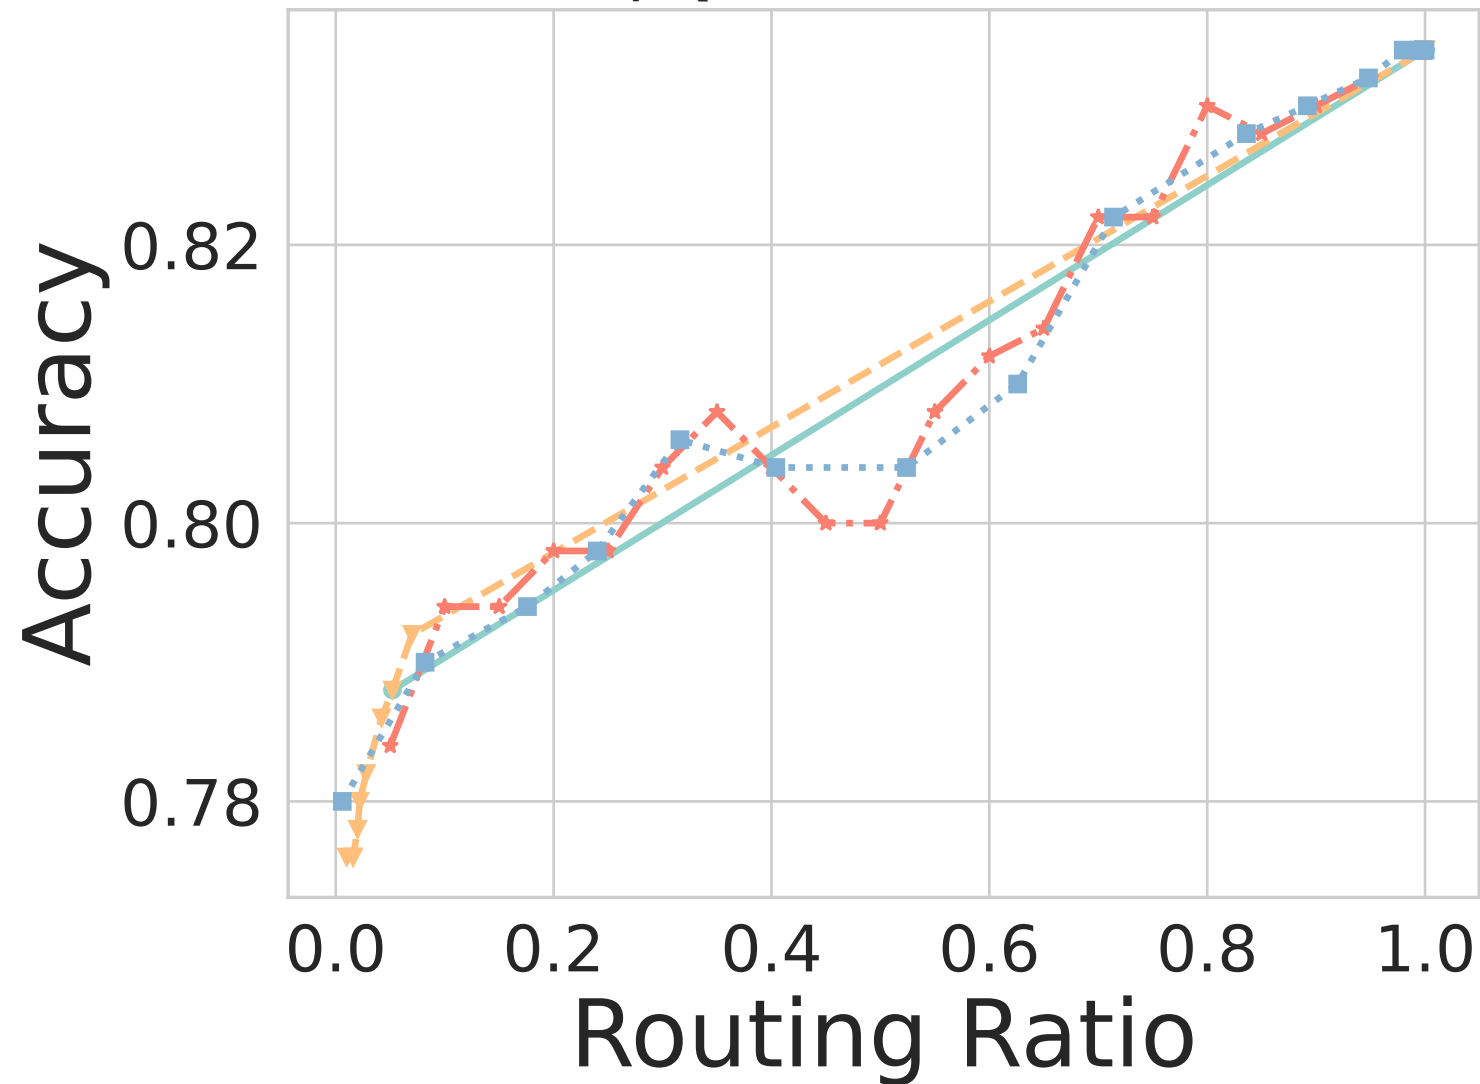

Supplement: supplementary_material [file cali_down_winogrande_Qwen3-4B_meta-llama_Llama-3.1-70B-Instruct.pdf › Routing_SLM_LLMs/Proxy_routing_prediction/to_meta-llama_Llama-3.1-70B-Instruct/winogrande_as_downstream/cali_down_winogrande_Qwen3-4B_meta-llama_Llama-3.1-70B-Instruct.pdf]

# WinoGrande, granite-3.1-8b to Llama-3.1-70B

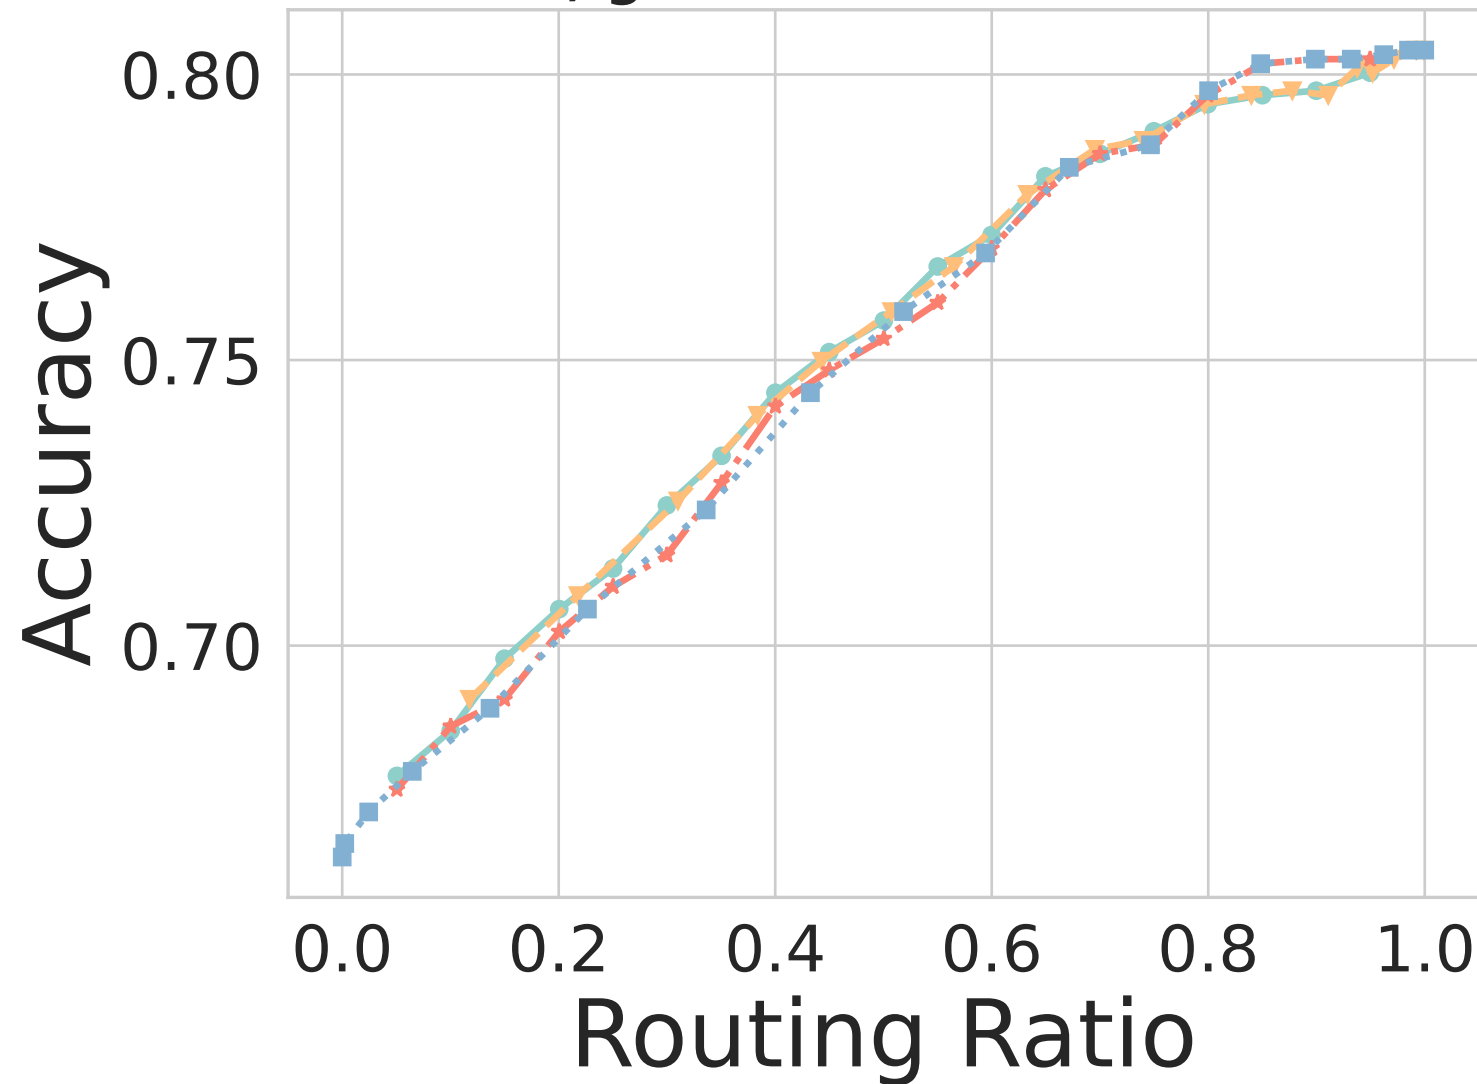

Supplement: supplementary_material [file cali_down_winogrande_granite-3.1-8b_meta-llama_Llama-3.1-70B-Instruct.pdf › Routing_SLM_LLMs/Proxy_routing_prediction/to_meta-llama_Llama-3.1-70B-Instruct/winogrande_as_downstream/cali_down_winogrande_granite-3.1-8b_meta-llama_Llama-3.1-70B-Instruct.pdf]

# WinoGrande, llama-3.1-8b to Llama-3.1-70B

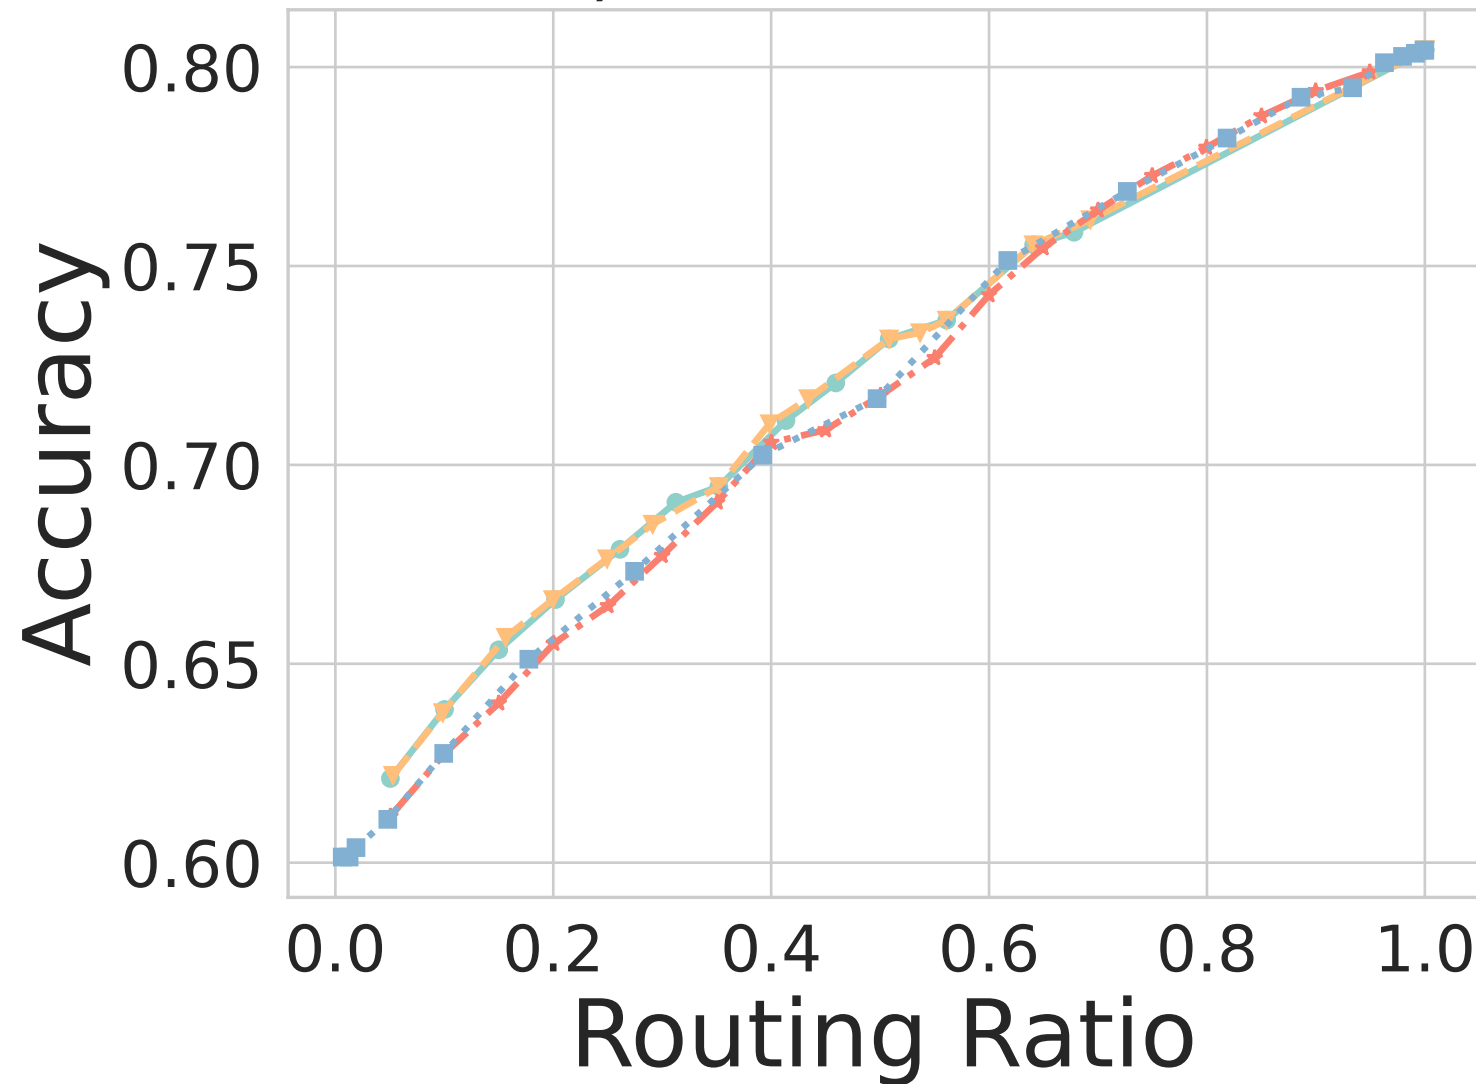

Supplement: supplementary_material [file cali_down_winogrande_llama-3.1-8b_meta-llama_Llama-3.1-70B-Instruct.pdf › Routing_SLM_LLMs/Proxy_routing_prediction/to_meta-llama_Llama-3.1-70B-Instruct/winogrande_as_downstream/cali_down_winogrande_llama-3.1-8b_meta-llama_Llama-3.1-70B-Instruct.pdf]

**WinoGrande, llama-3.2-1b to Llama-3.1-70B**

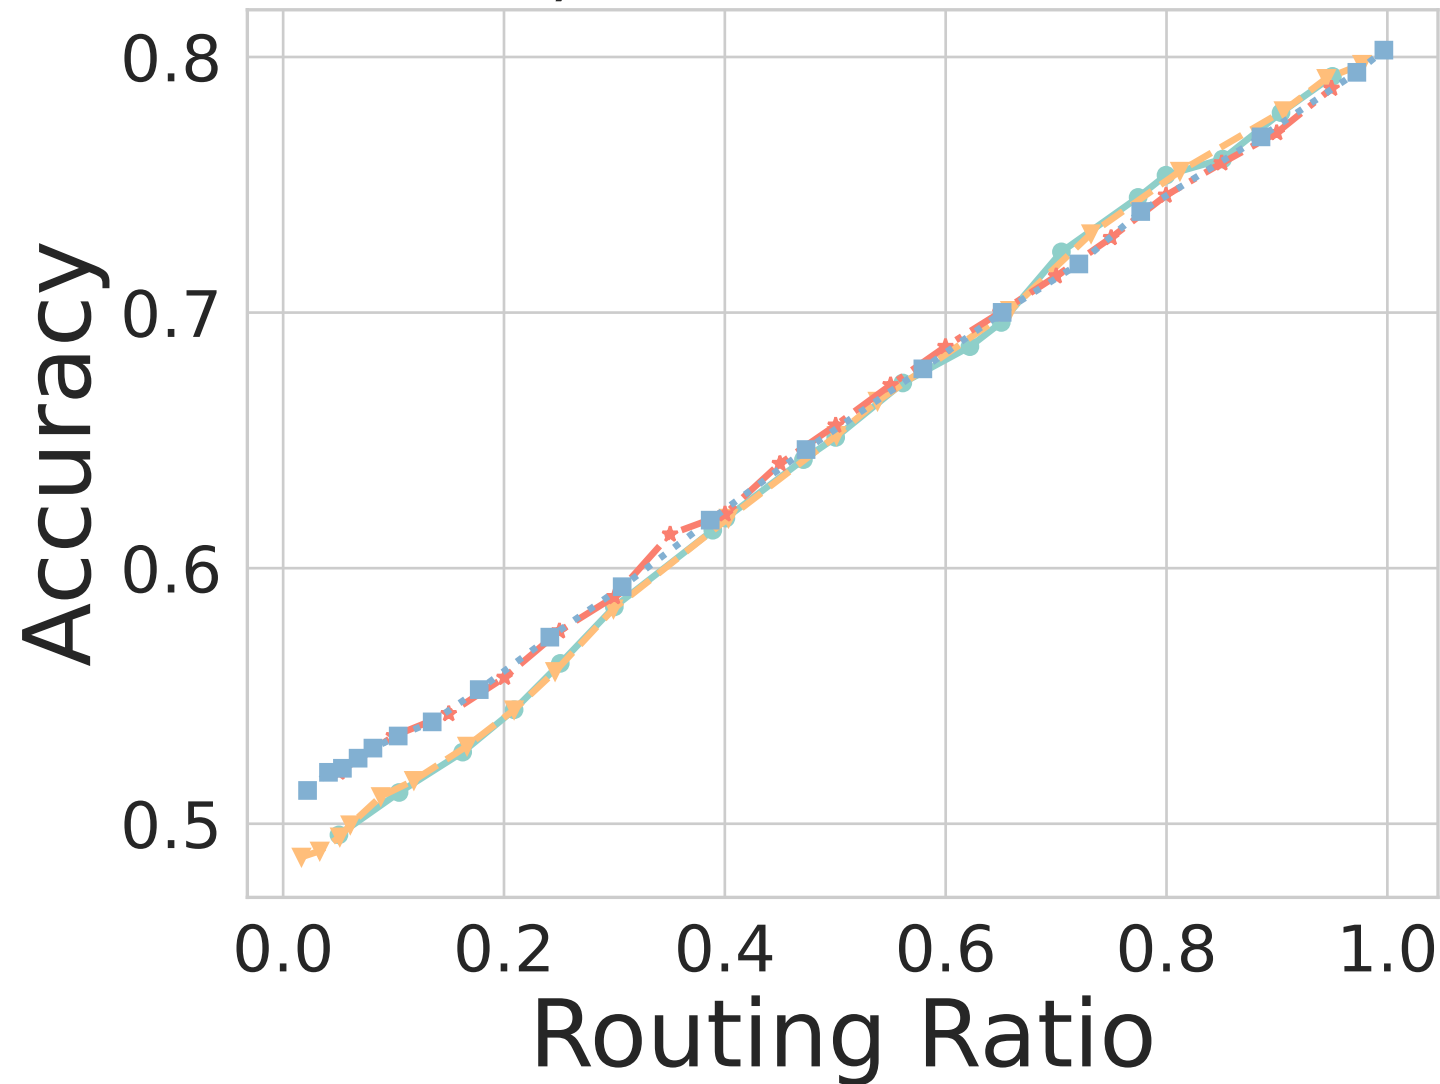

Supplement: supplementary_material [file cali_down_winogrande_llama-3.2-1b_meta-llama_Llama-3.1-70B-Instruct.pdf › Routing_SLM_LLMs/Proxy_routing_prediction/to_meta-llama_Llama-3.1-70B-Instruct/winogrande_as_downstream/cali_down_winogrande_llama-3.2-1b_meta-llama_Llama-3.1-70B-Instruct.pdf]

# WinoGrande, llama-3.2-3b to Llama-3.1-70B

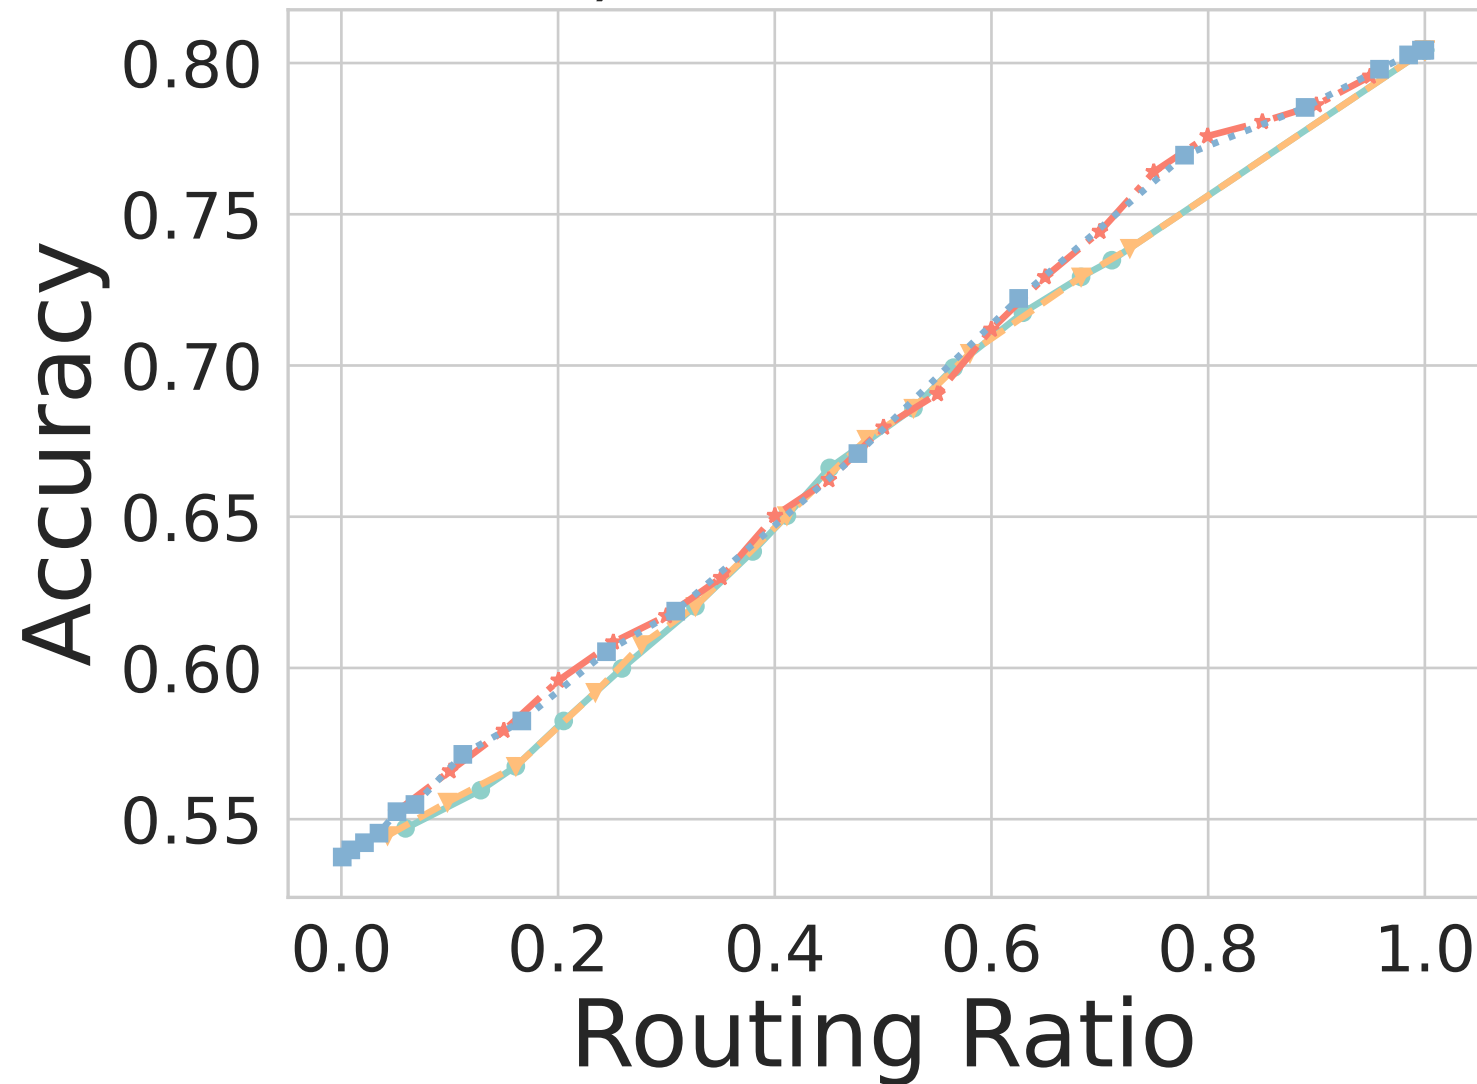

Supplement: supplementary_material [file cali_down_winogrande_llama-3.2-3b_meta-llama_Llama-3.1-70B-Instruct.pdf › Routing_SLM_LLMs/Proxy_routing_prediction/to_meta-llama_Llama-3.1-70B-Instruct/winogrande_as_downstream/cali_down_winogrande_llama-3.2-3b_meta-llama_Llama-3.1-70B-Instruct.pdf]

# WinoGrande, mistral-7b to Llama-3.1-70B

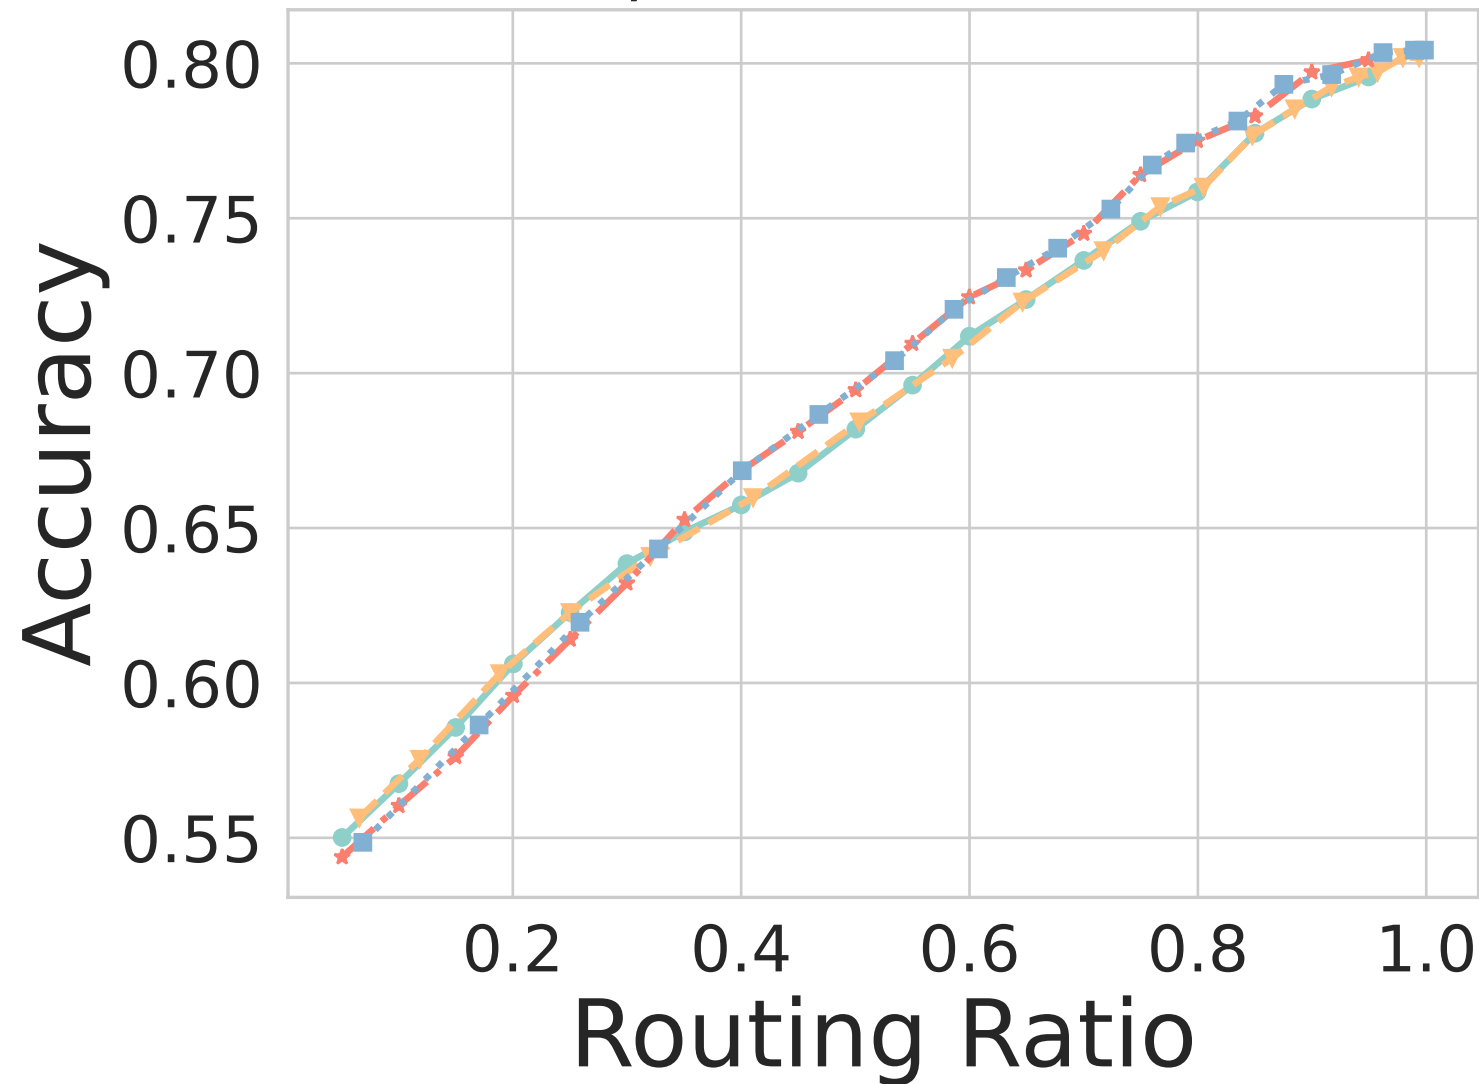

Supplement: supplementary_material [file cali_down_winogrande_mistral-7b_meta-llama_Llama-3.1-70B-Instruct.pdf › Routing_SLM_LLMs/Proxy_routing_prediction/to_meta-llama_Llama-3.1-70B-Instruct/winogrande_as_downstream/cali_down_winogrande_mistral-7b_meta-llama_Llama-3.1-70B-Instruct.pdf]

# WinoGrande, phi-3.5-mini to Llama-3.1-70B

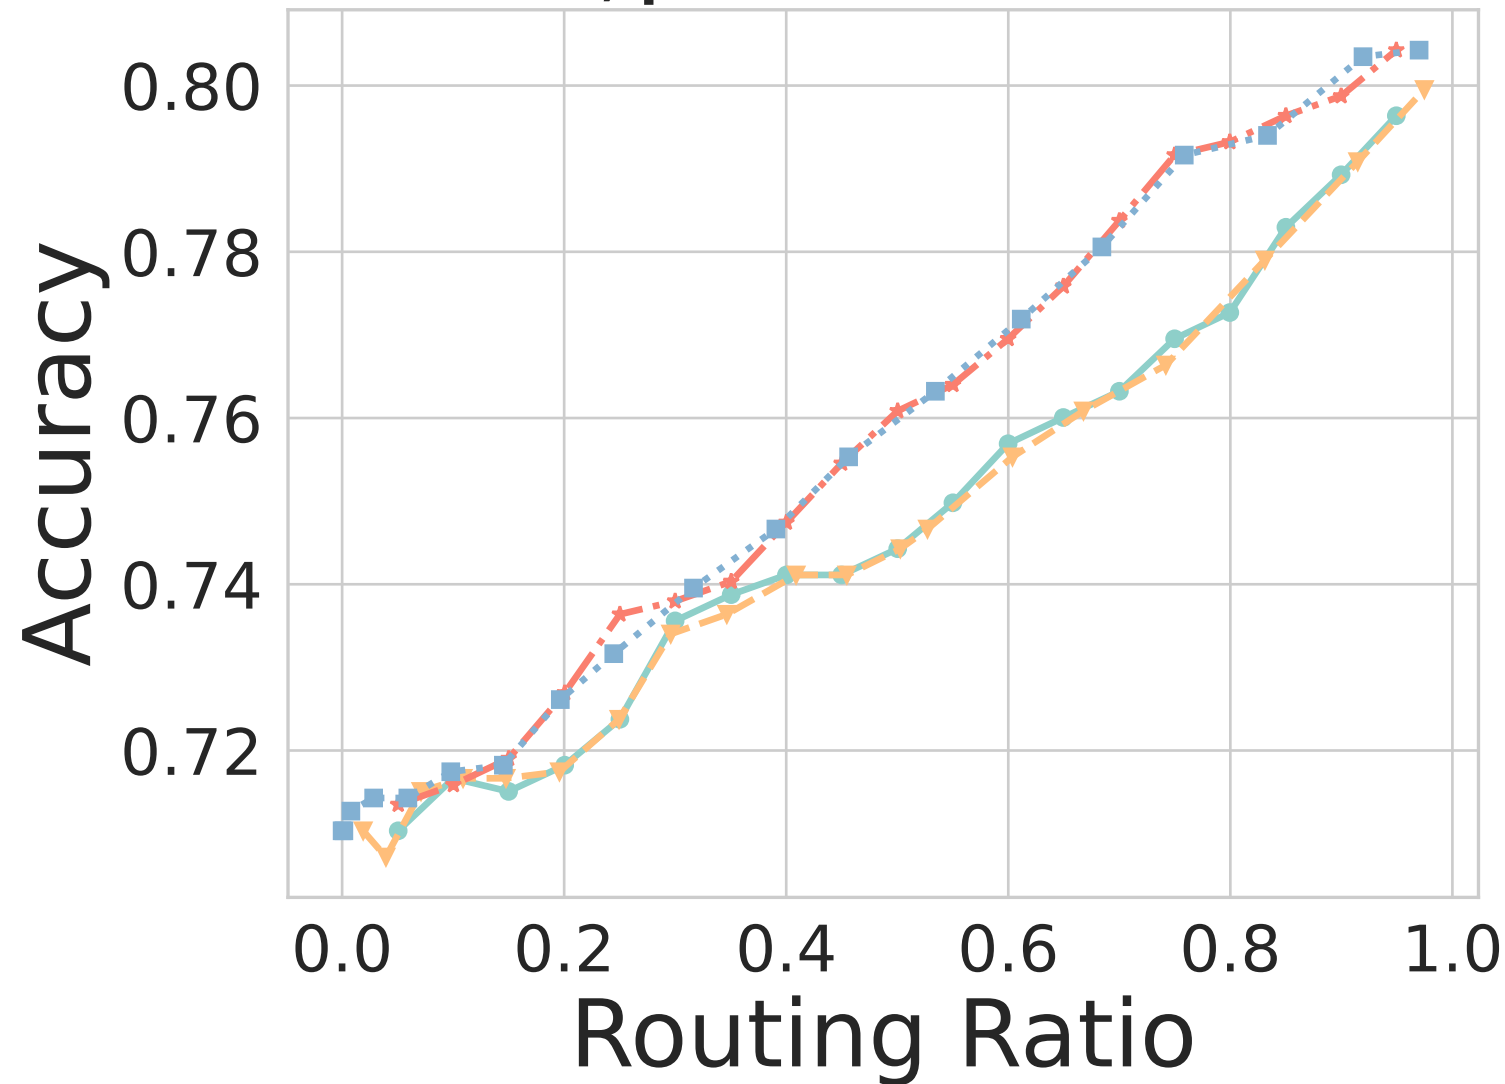

Supplement: supplementary_material [file cali_down_winogrande_phi-3.5-mini_meta-llama_Llama-3.1-70B-Instruct.pdf › Routing_SLM_LLMs/Proxy_routing_prediction/to_meta-llama_Llama-3.1-70B-Instruct/winogrande_as_downstream/cali_down_winogrande_phi-3.5-mini_meta-llama_Llama-3.1-70B-Instruct.pdf]

# WinoGrande, phi-4-mini-reasoning to Llama-3.1-70B

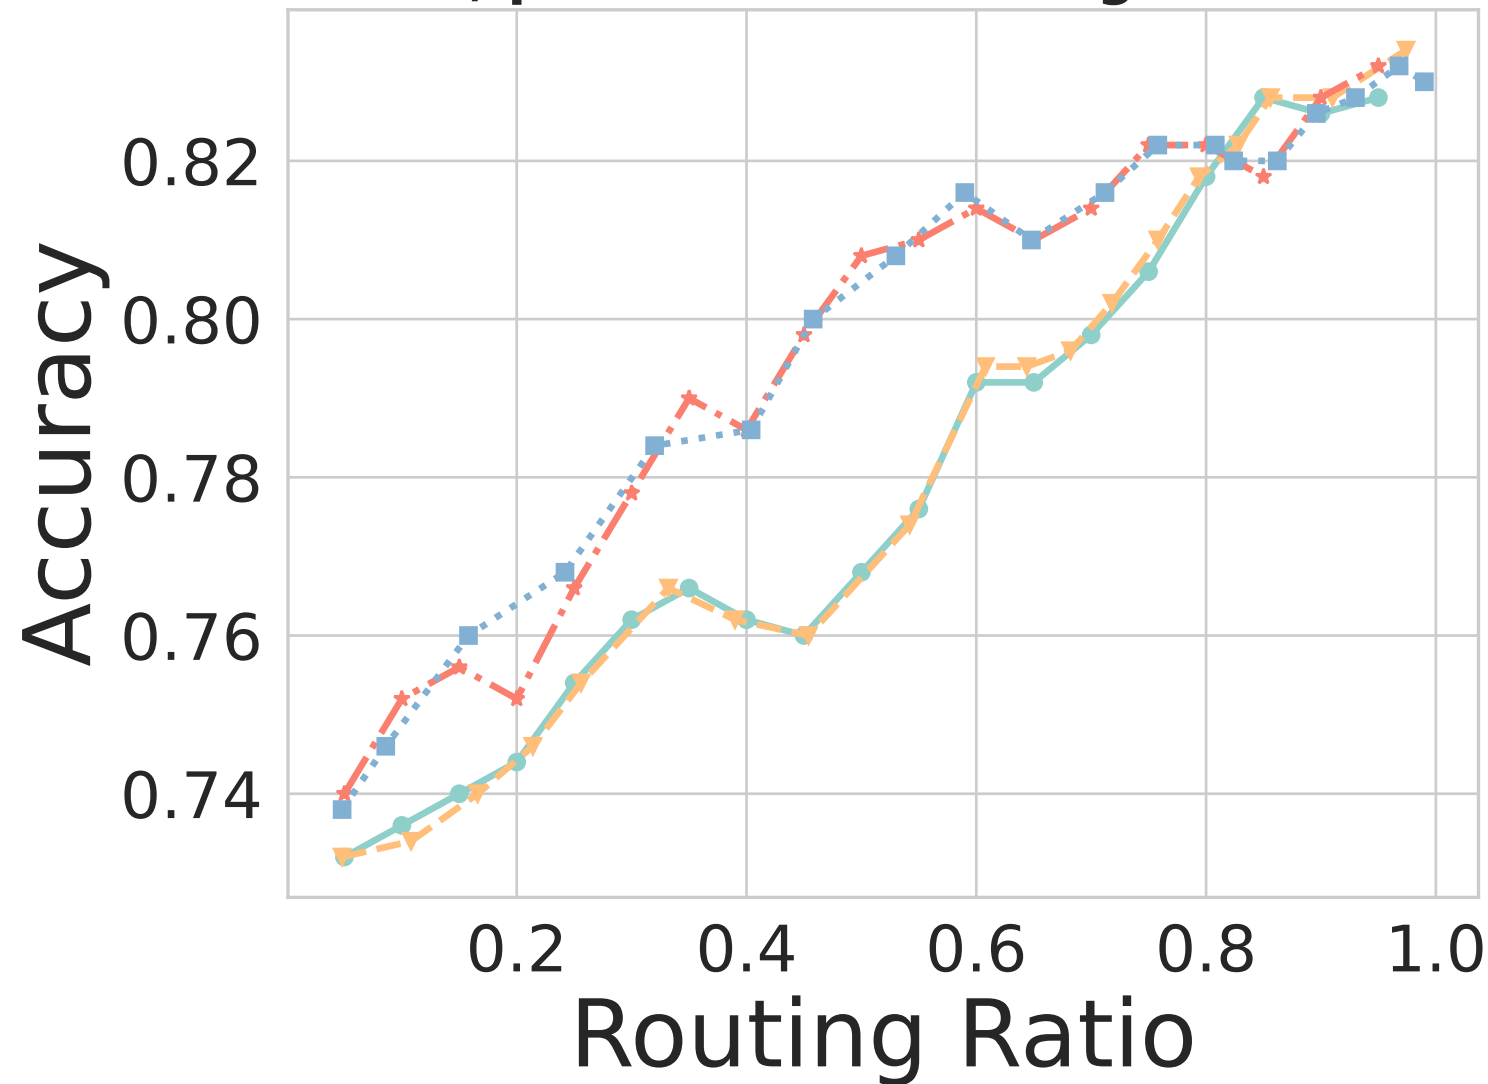

Supplement: supplementary_material [file cali_down_winogrande_phi-4-mini-reasoning_meta-llama_Llama-3.1-70B-Instruct.pdf › Routing_SLM_LLMs/Proxy_routing_prediction/to_meta-llama_Llama-3.1-70B-Instruct/winogrande_as_downstream/cali_down_winogrande_phi-4-mini-reasoning_meta-llama_Llama-3.1-70B-Instruct.pdf]

WinoGrande, qwen-2.5-7b to Llama-3.1-70B

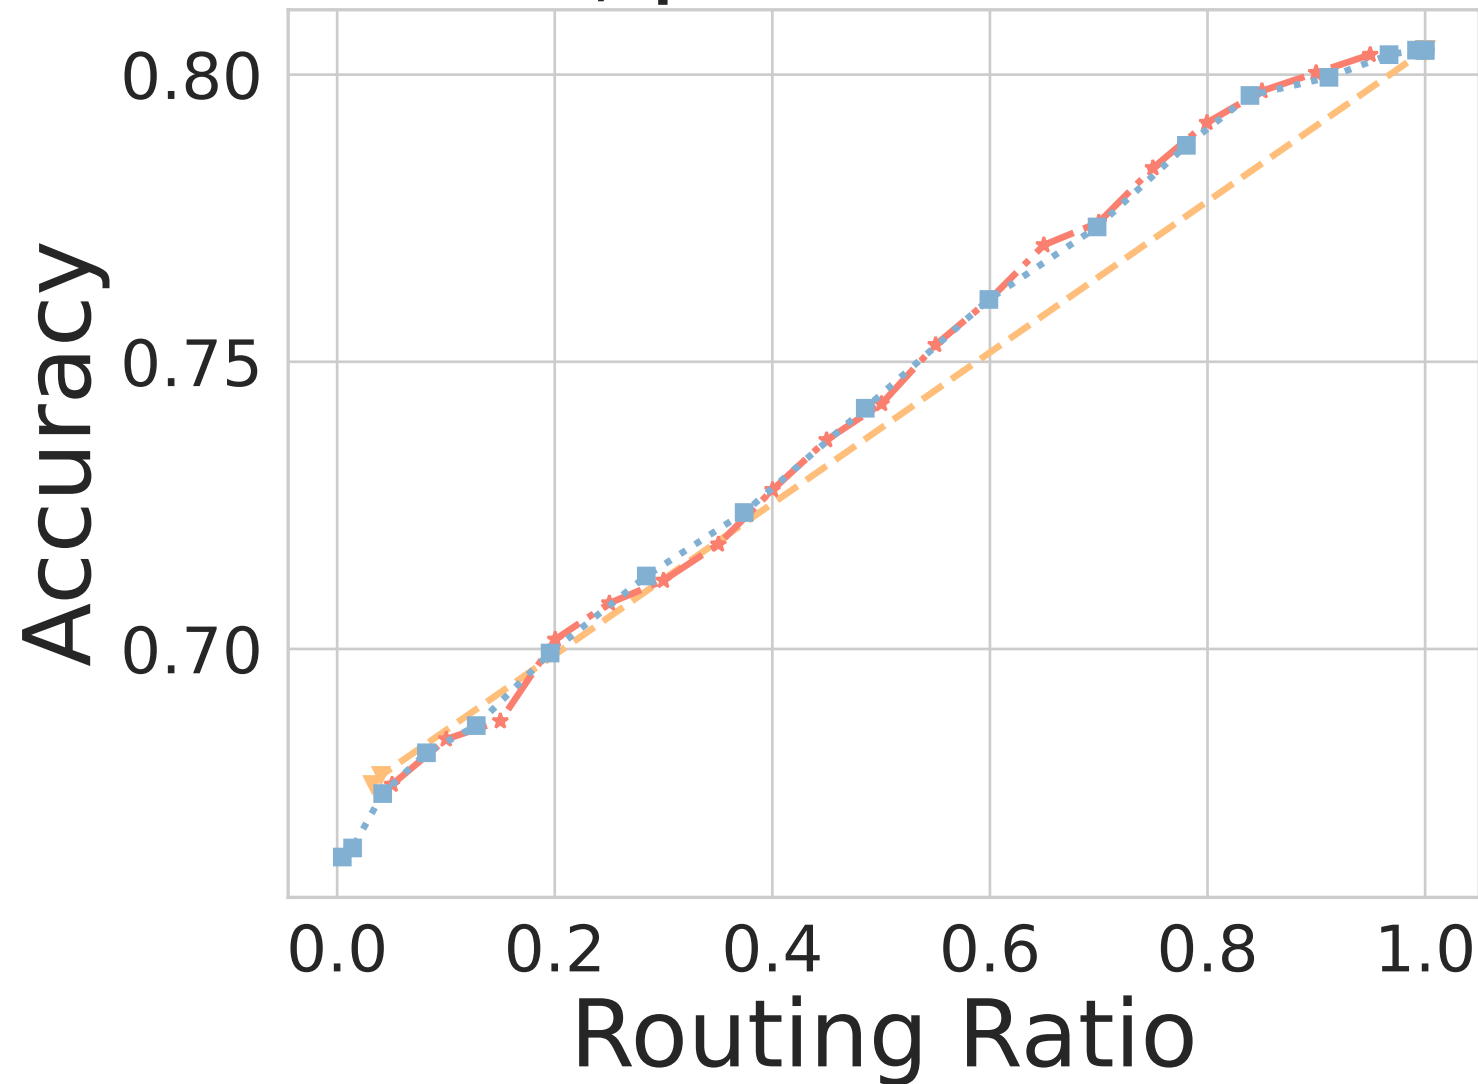

Supplement: supplementary_material [file cali_down_winogrande_qwen-2.5-7b_meta-llama_Llama-3.1-70B-Instruct.pdf › Routing_SLM_LLMs/Proxy_routing_prediction/to_meta-llama_Llama-3.1-70B-Instruct/winogrande_as_downstream/cali_down_winogrande_qwen-2.5-7b_meta-llama_Llama-3.1-70B-Instruct.pdf]

**WinoGrande, rwkv to Llama-3.1-70B**

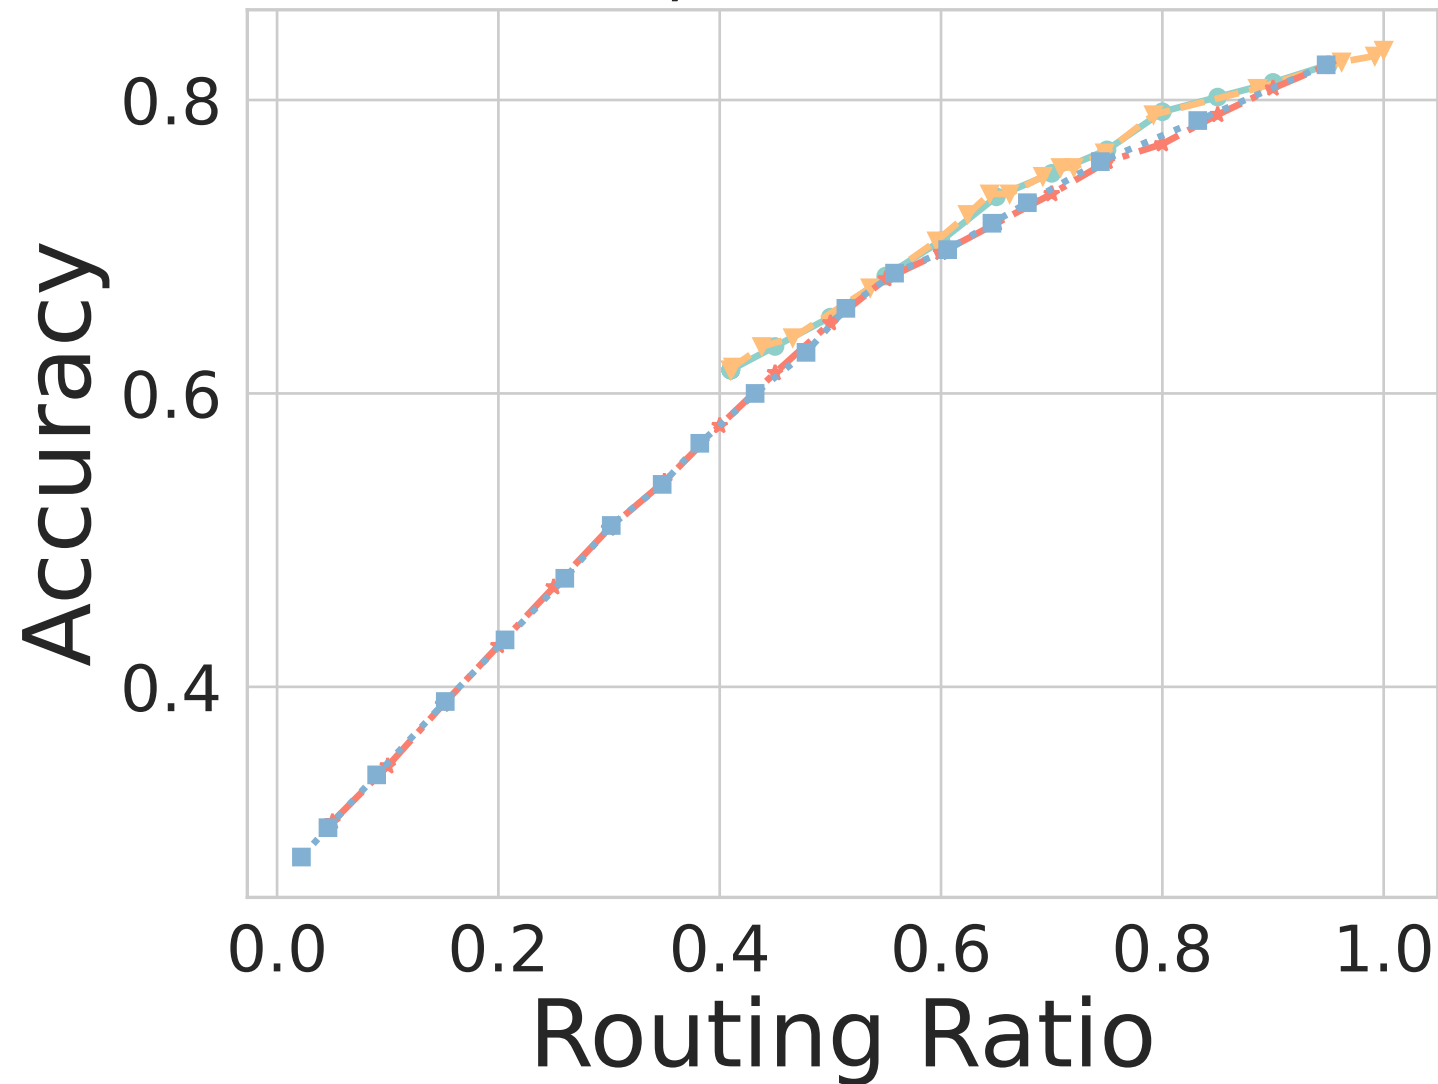

Supplement: supplementary_material [file cali_down_winogrande_rwkv_meta-llama_Llama-3.1-70B-Instruct.pdf › Routing_SLM_LLMs/Proxy_routing_prediction/to_meta-llama_Llama-3.1-70B-Instruct/winogrande_as_downstream/cali_down_winogrande_rwkv_meta-llama_Llama-3.1-70B-Instruct.pdf]

# AQuA, Qwen3-0.6B to DeepSeek-R1

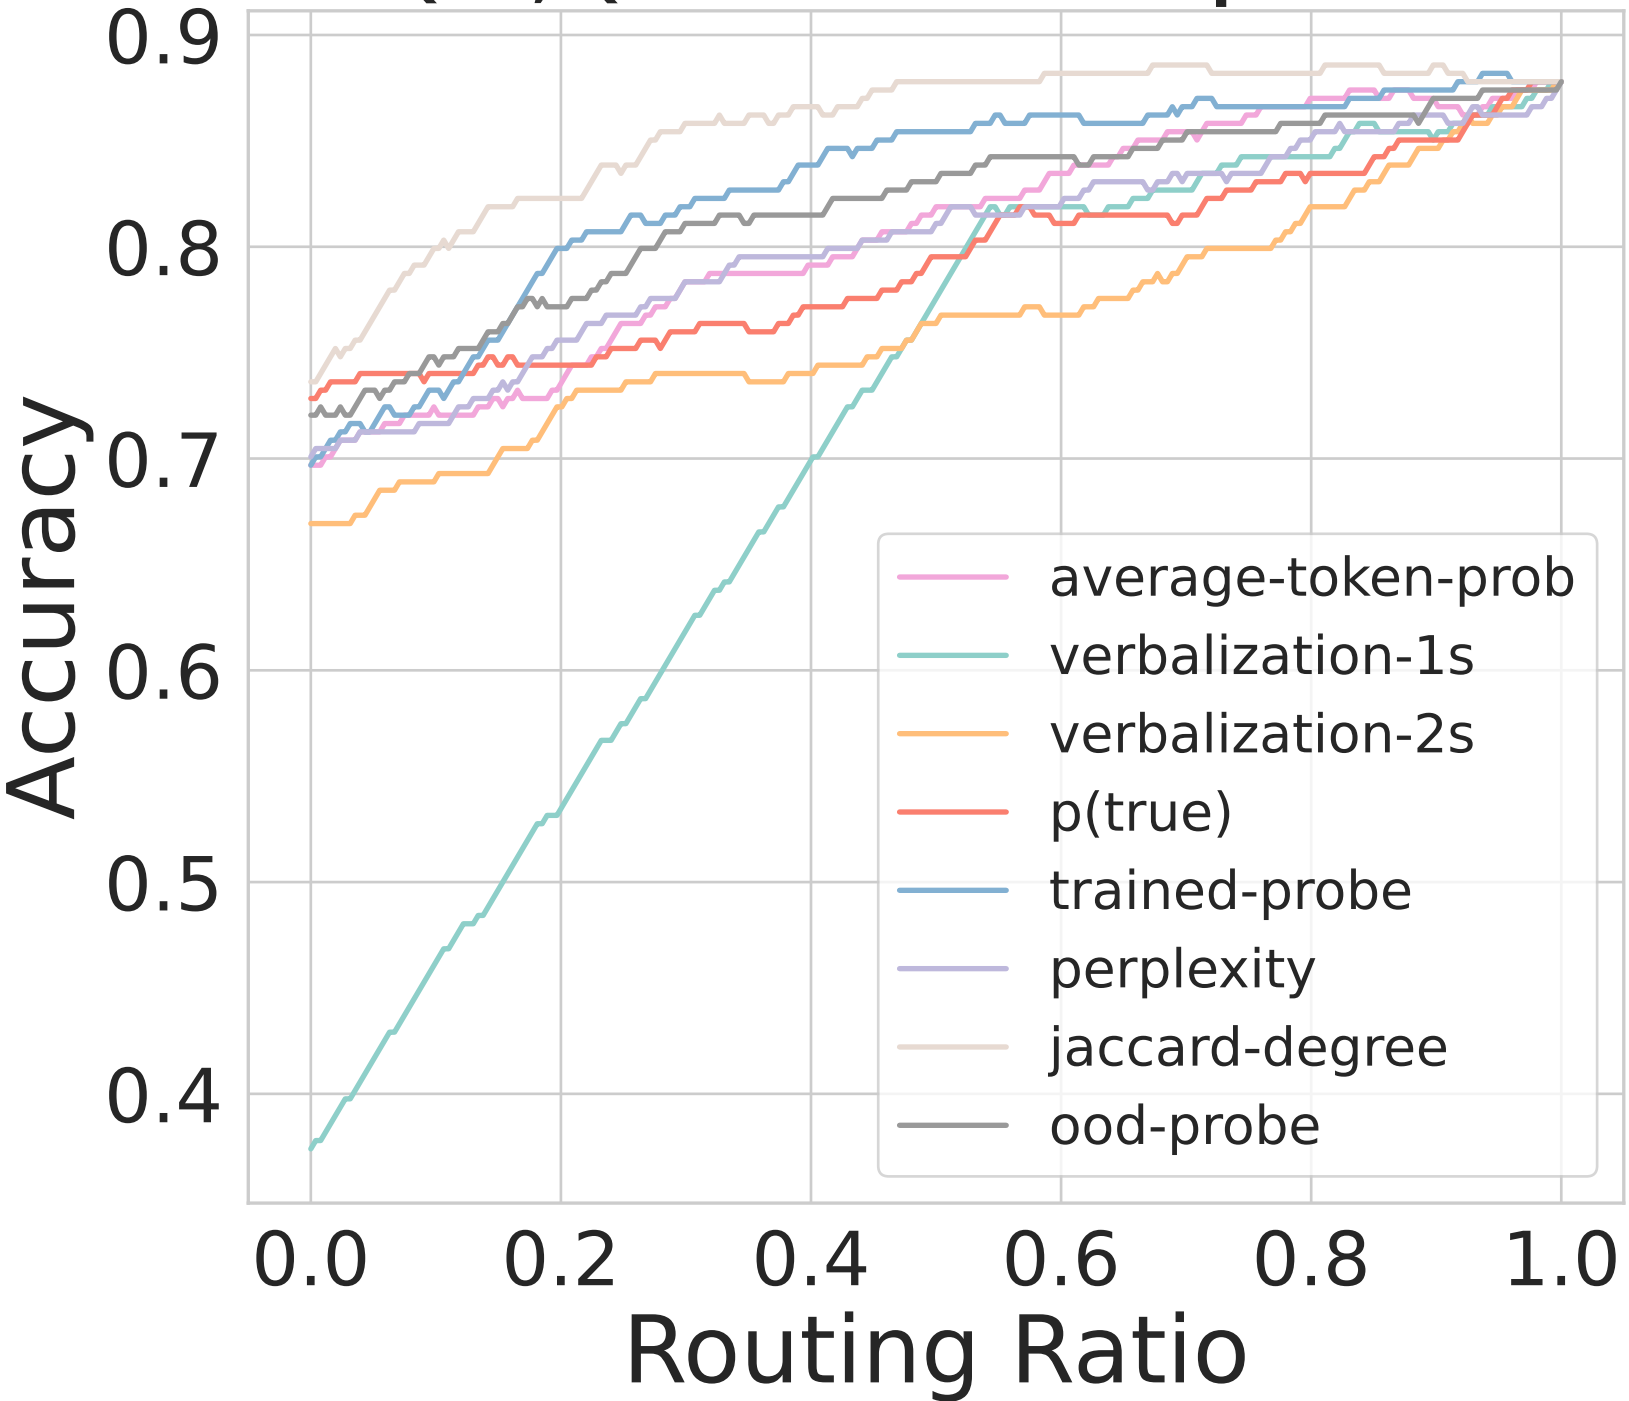

Supplement: supplementary_material [file rr_acc_aqua_Qwen3-0.6B_dsR1.pdf › Routing_SLM_LLMs/Uncertainty-based Routing/w_legend/to_dsR1/rr_acc_aqua_Qwen3-0.6B_dsR1.pdf]

# AQuA, Qwen3-1.7B to DeepSeek-R1

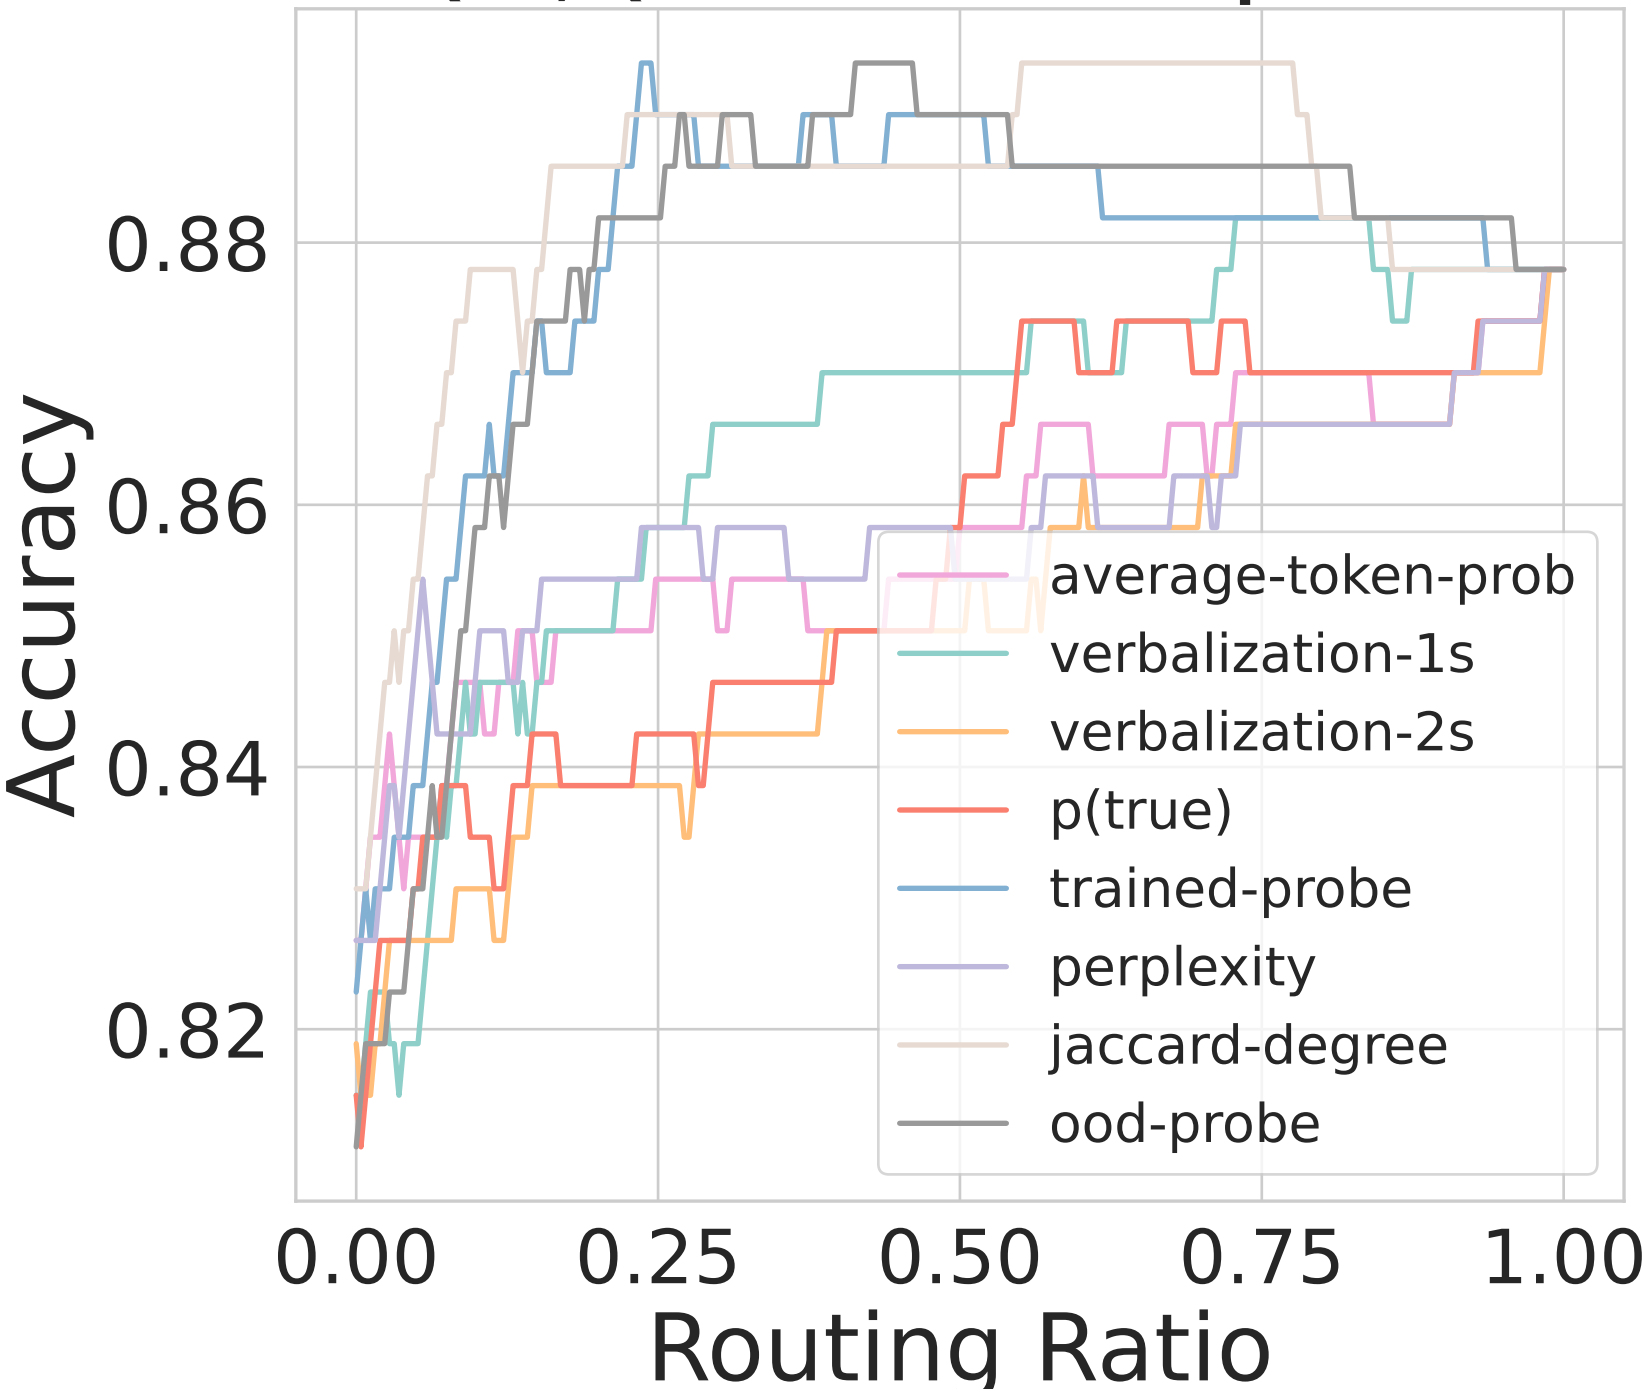

Supplement: supplementary_material [file rr_acc_aqua_Qwen3-1.7B_dsR1.pdf › Routing_SLM_LLMs/Uncertainty-based Routing/w_legend/to_dsR1/rr_acc_aqua_Qwen3-1.7B_dsR1.pdf]

**AQuA, Qwen3-4B to DeepSeek-R1**

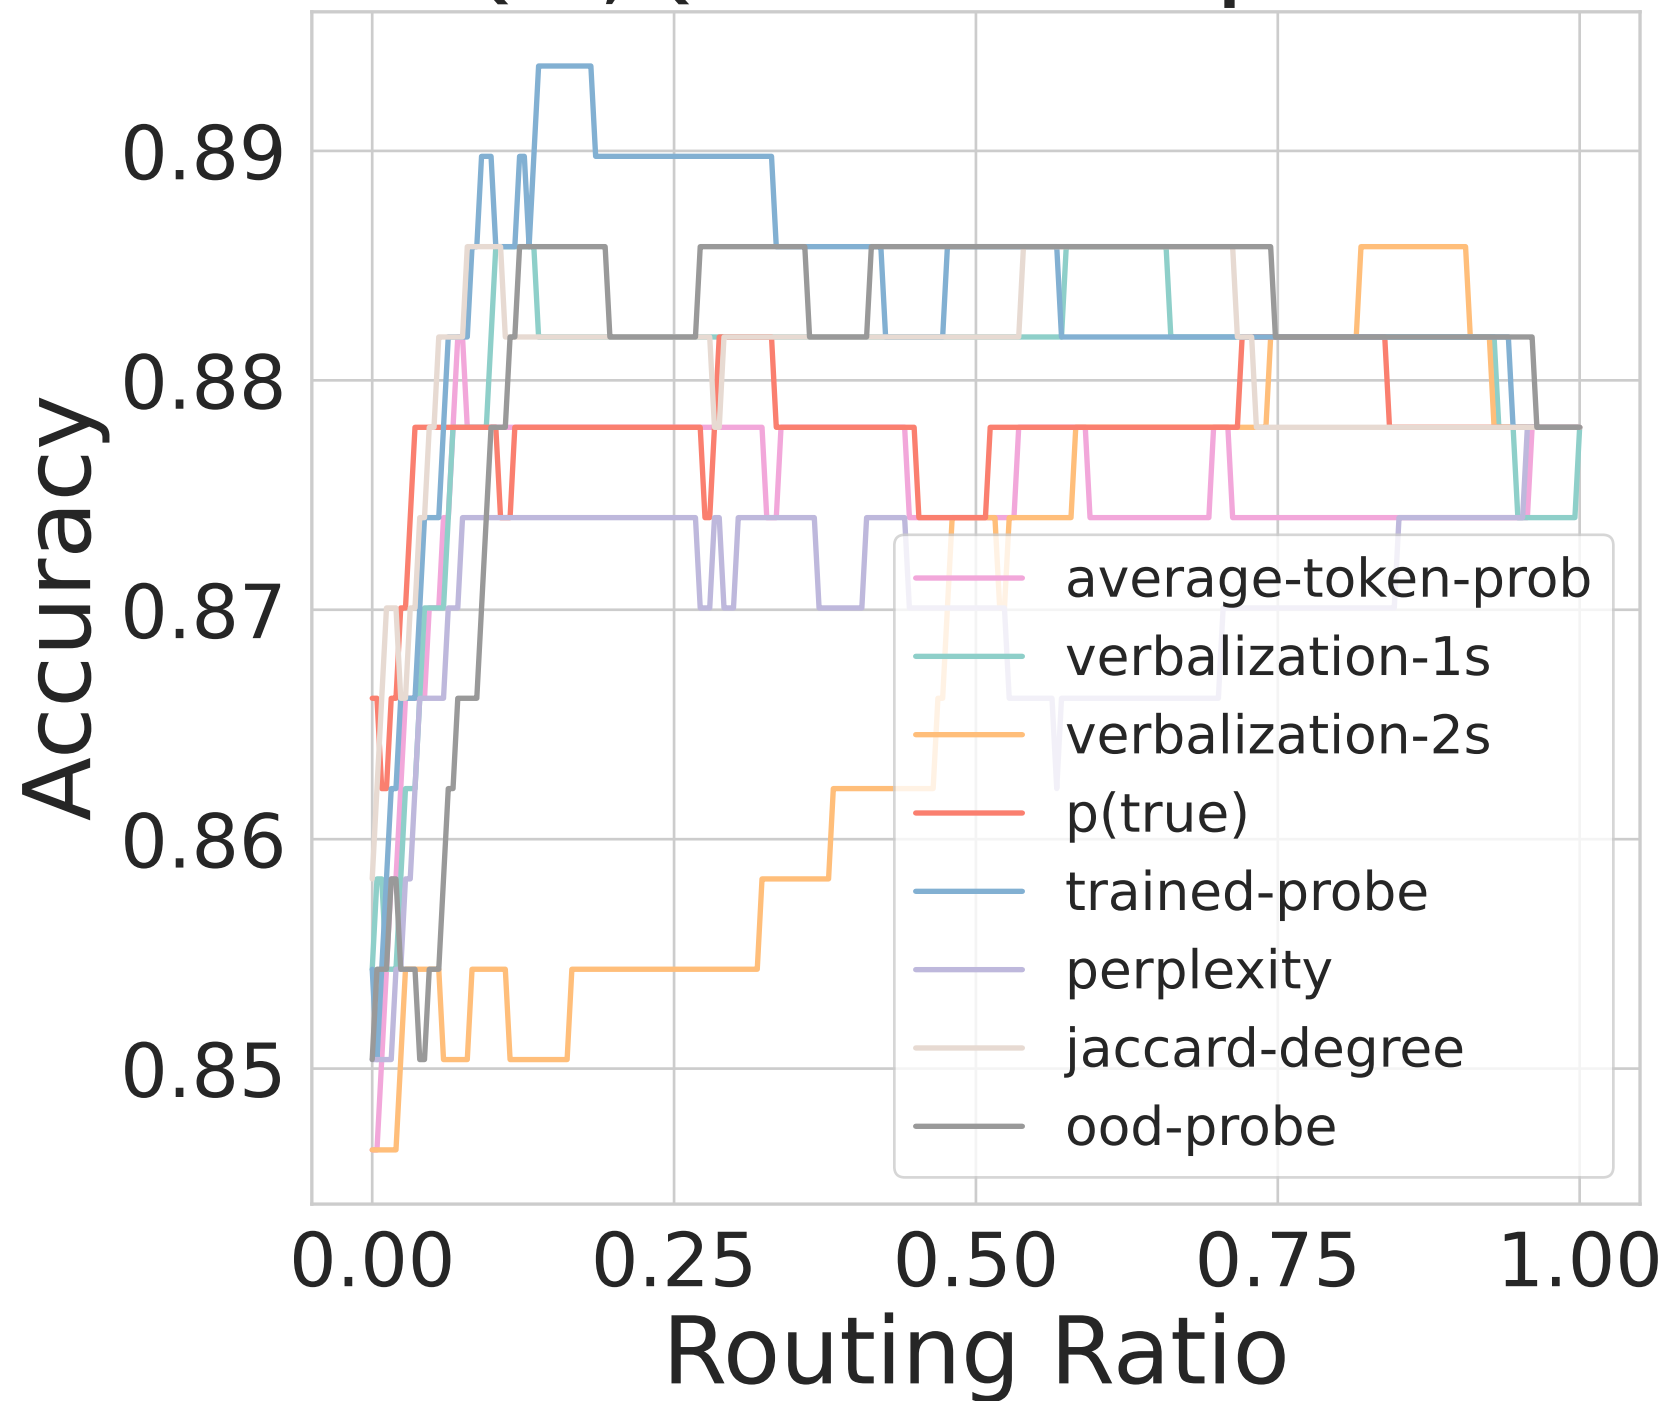

Supplement: supplementary_material [file rr_acc_aqua_Qwen3-4B_dsR1.pdf › Routing_SLM_LLMs/Uncertainty-based Routing/w_legend/to_dsR1/rr_acc_aqua_Qwen3-4B_dsR1.pdf]

**AQuA, granite-3.1-8b to DeepSeek-R1**

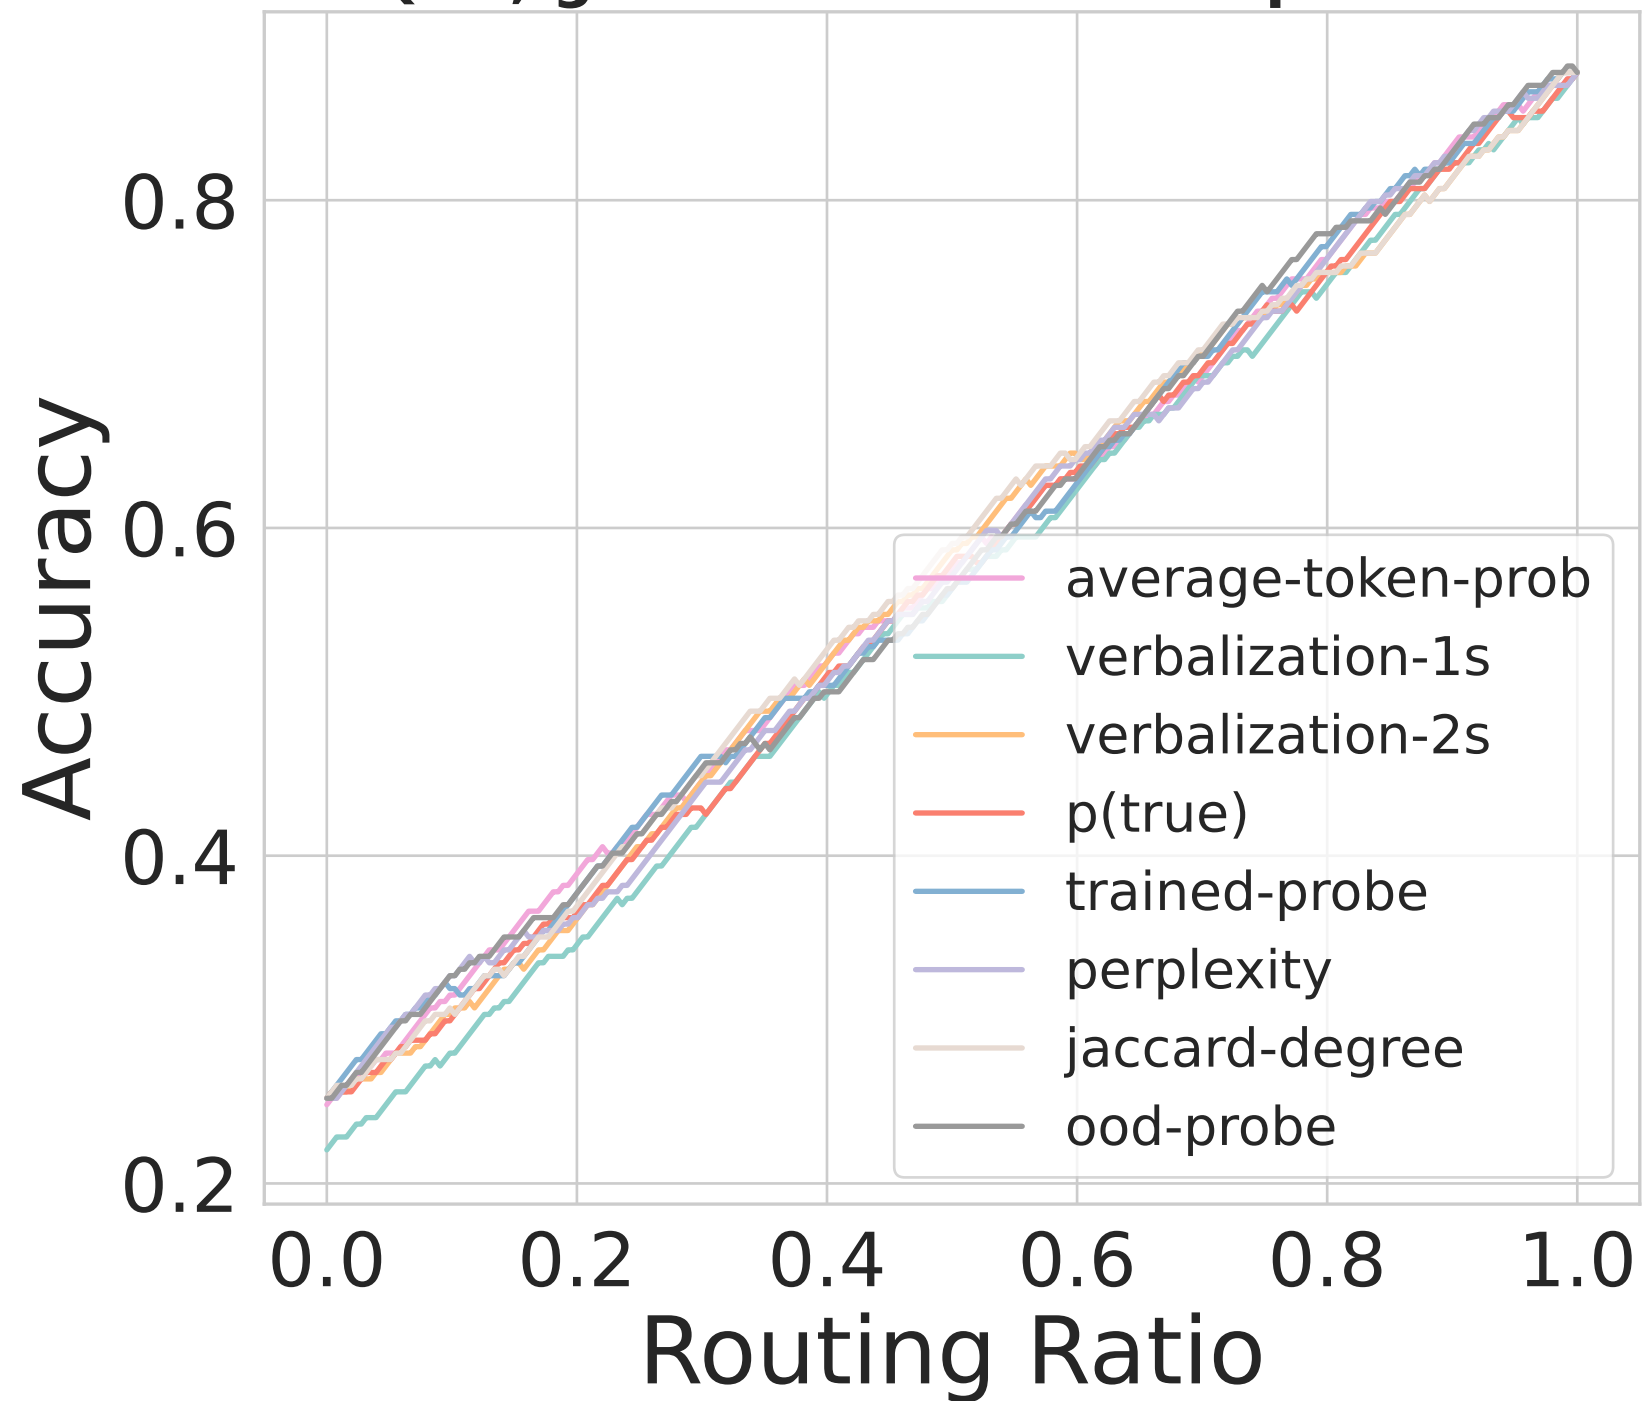

Supplement: supplementary_material [file rr_acc_aqua_granite-3.1-8b_dsR1.pdf › Routing_SLM_LLMs/Uncertainty-based Routing/w_legend/to_dsR1/rr_acc_aqua_granite-3.1-8b_dsR1.pdf]

# AQuA, llama-3.2-1b to DeepSeek-R1

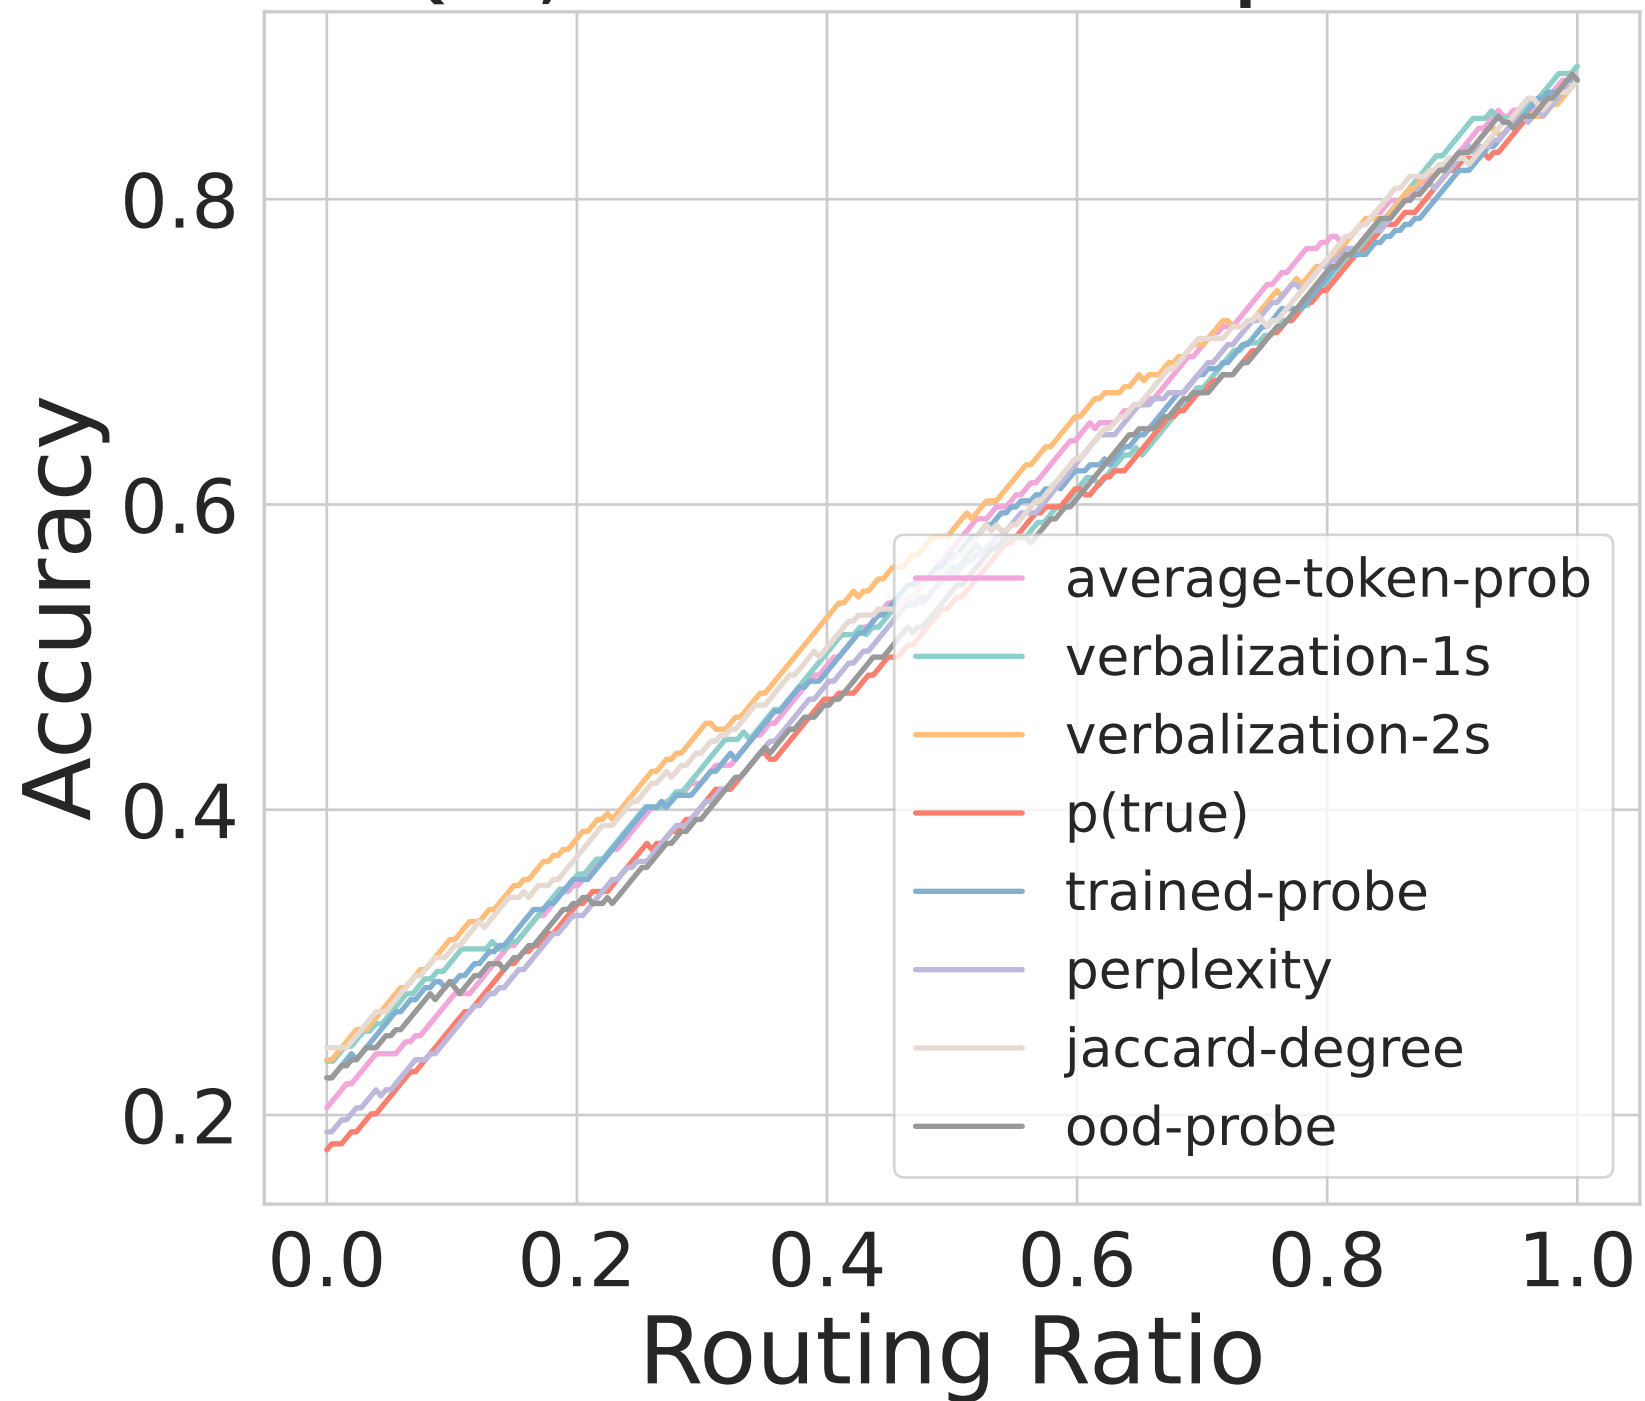

Supplement: supplementary_material [file rr_acc_aqua_llama-3.2-1b_dsR1.pdf › Routing_SLM_LLMs/Uncertainty-based Routing/w_legend/to_dsR1/rr_acc_aqua_llama-3.2-1b_dsR1.pdf]

**AQuA, llama-3.2-3b to DeepSeek-R1**

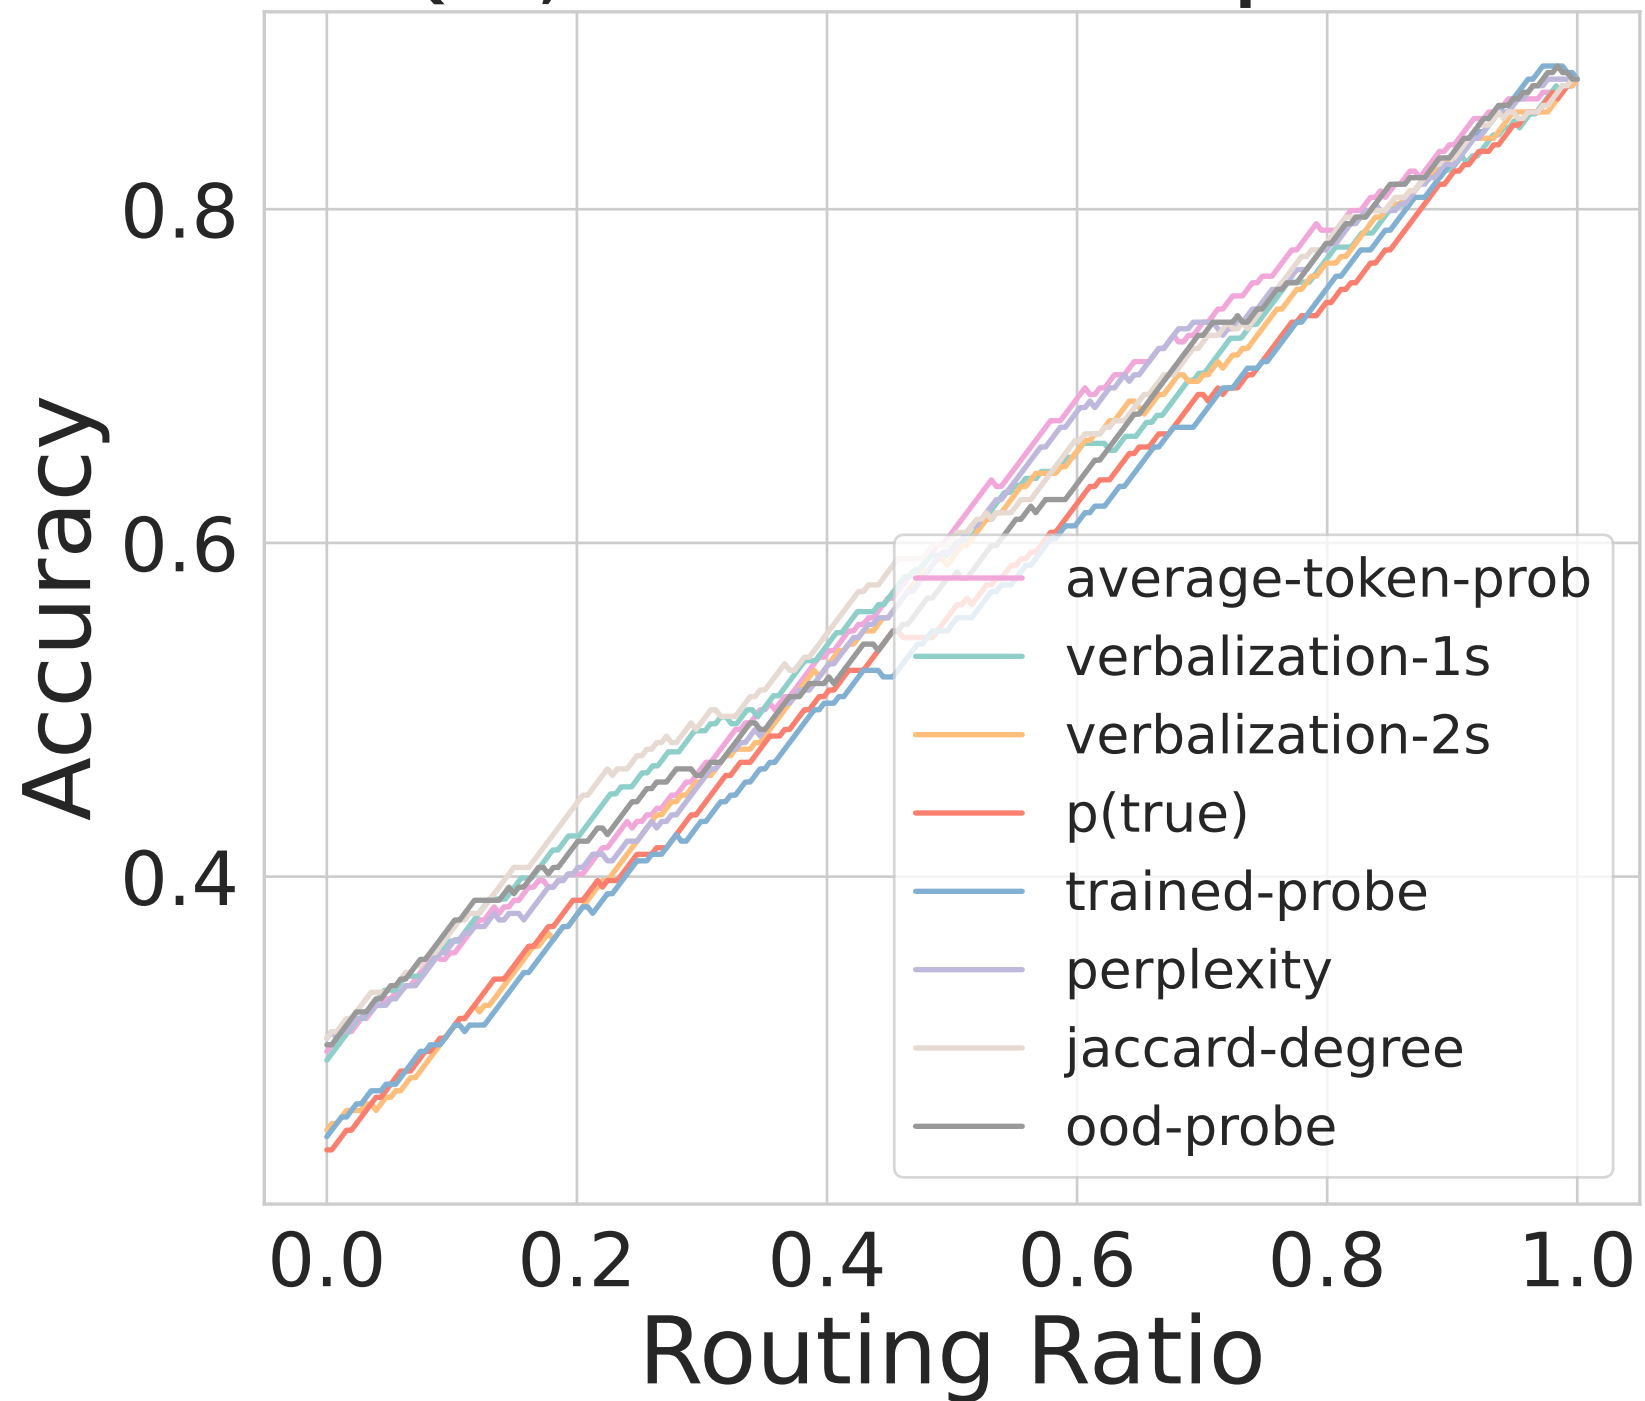

Supplement: supplementary_material [file rr_acc_aqua_llama-3.2-3b_dsR1.pdf › Routing_SLM_LLMs/Uncertainty-based Routing/w_legend/to_dsR1/rr_acc_aqua_llama-3.2-3b_dsR1.pdf]

# AQuA, mistral-7b to DeepSeek-R1

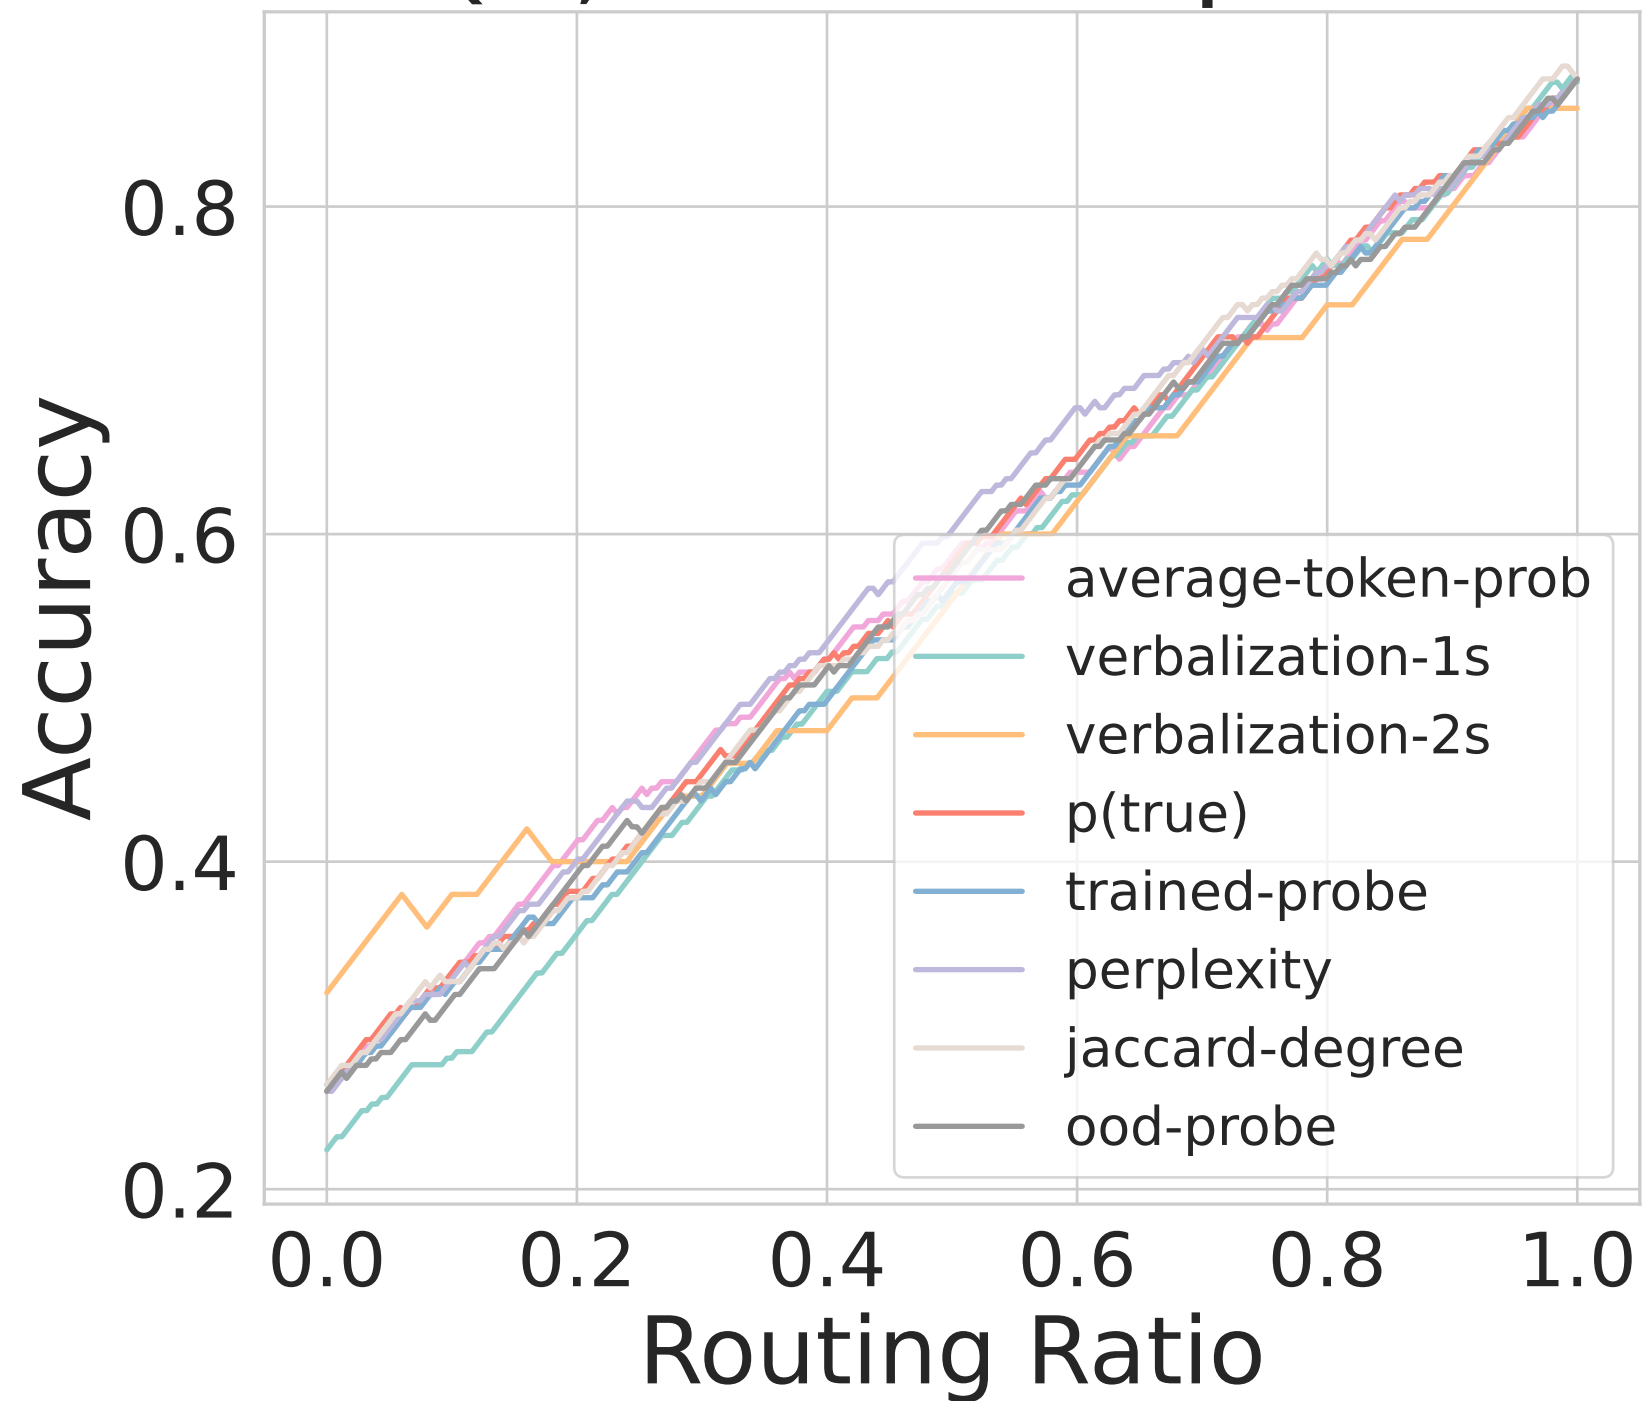

Supplement: supplementary_material [file rr_acc_aqua_mistral-7b_dsR1.pdf › Routing_SLM_LLMs/Uncertainty-based Routing/w_legend/to_dsR1/rr_acc_aqua_mistral-7b_dsR1.pdf]

**AQuA, phi-3.5-mini to DeepSeek-R1**

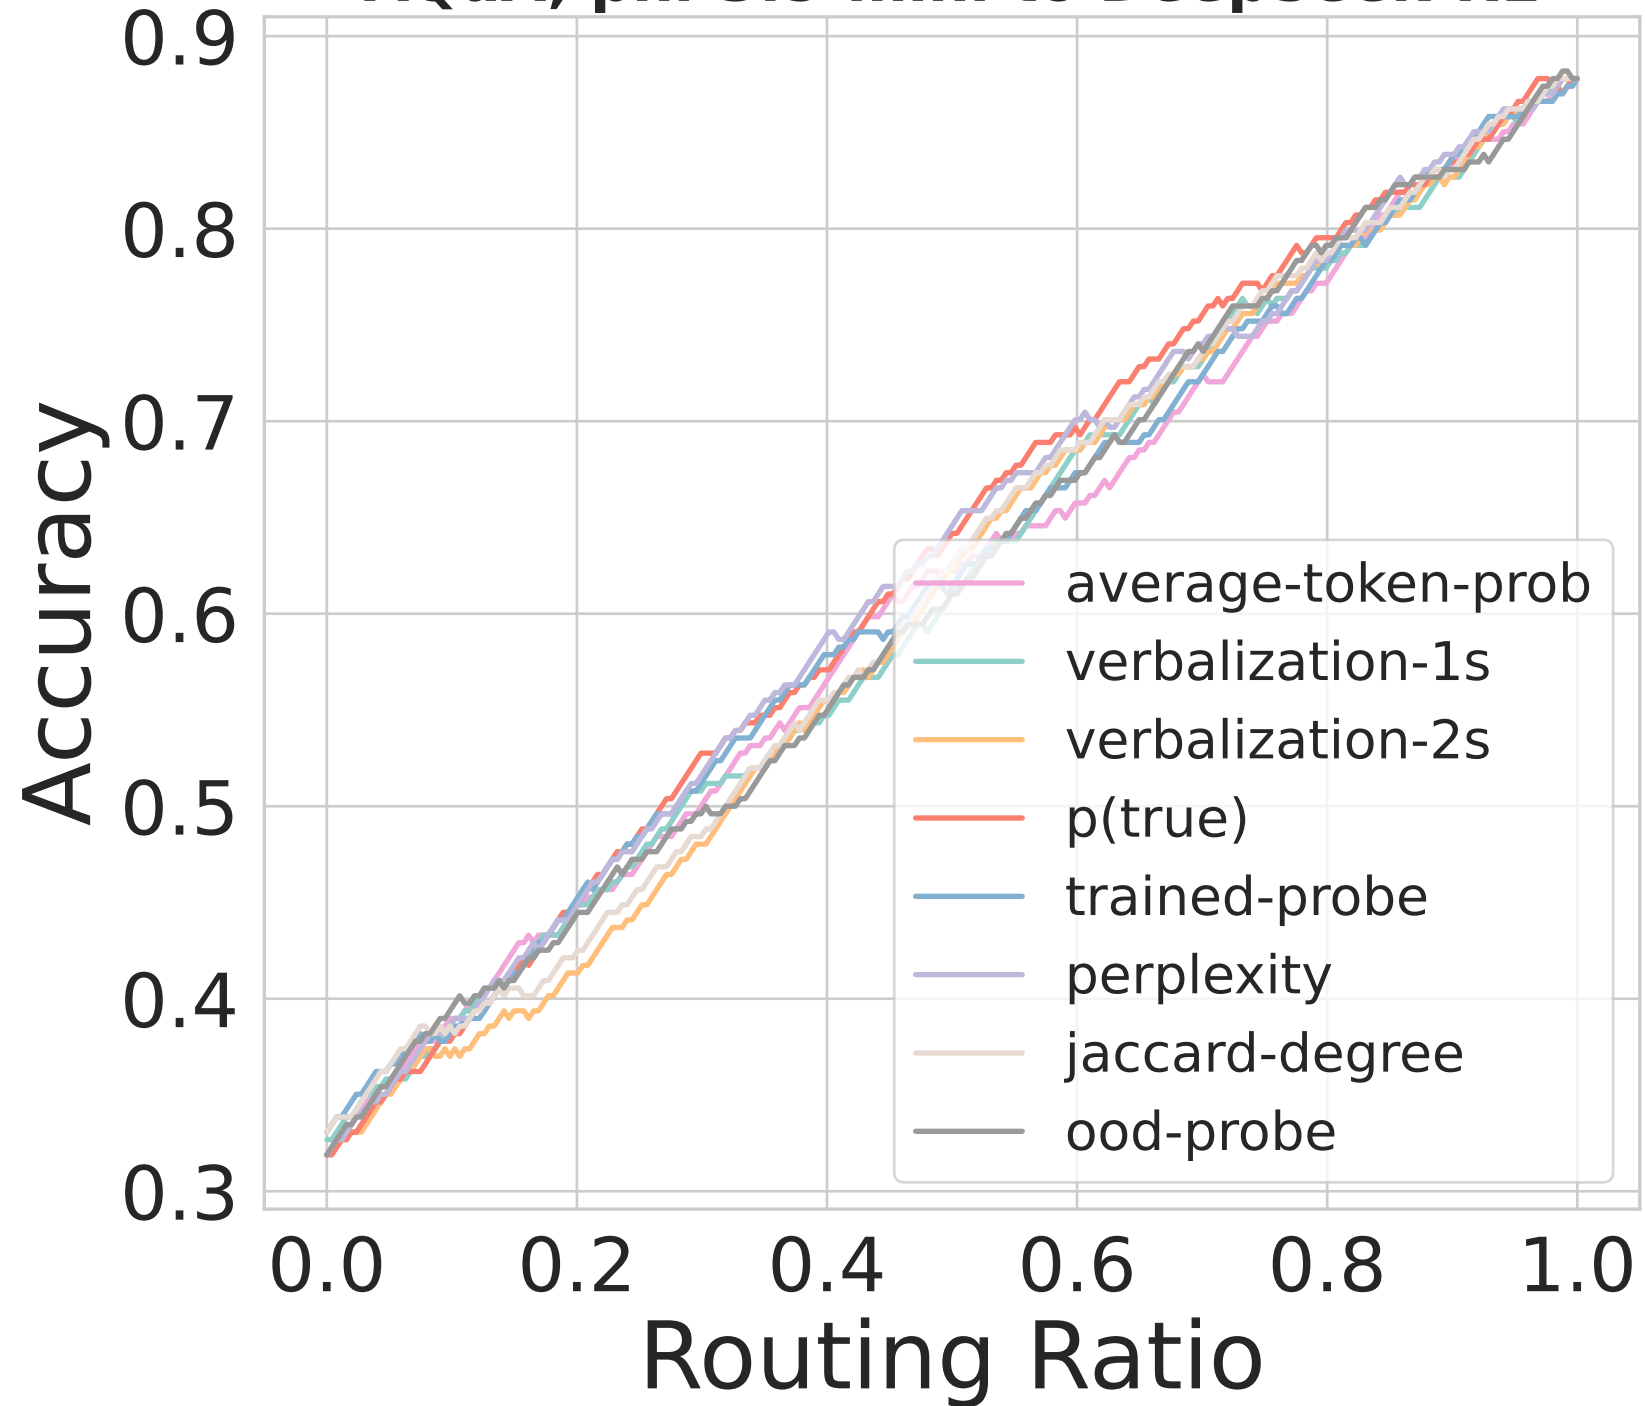

Supplement: supplementary_material [file rr_acc_aqua_phi-3.5-mini_dsR1.pdf › Routing_SLM_LLMs/Uncertainty-based Routing/w_legend/to_dsR1/rr_acc_aqua_phi-3.5-mini_dsR1.pdf]

# AQuA, phi-4-mini-reasoning to DeepSeek-R1

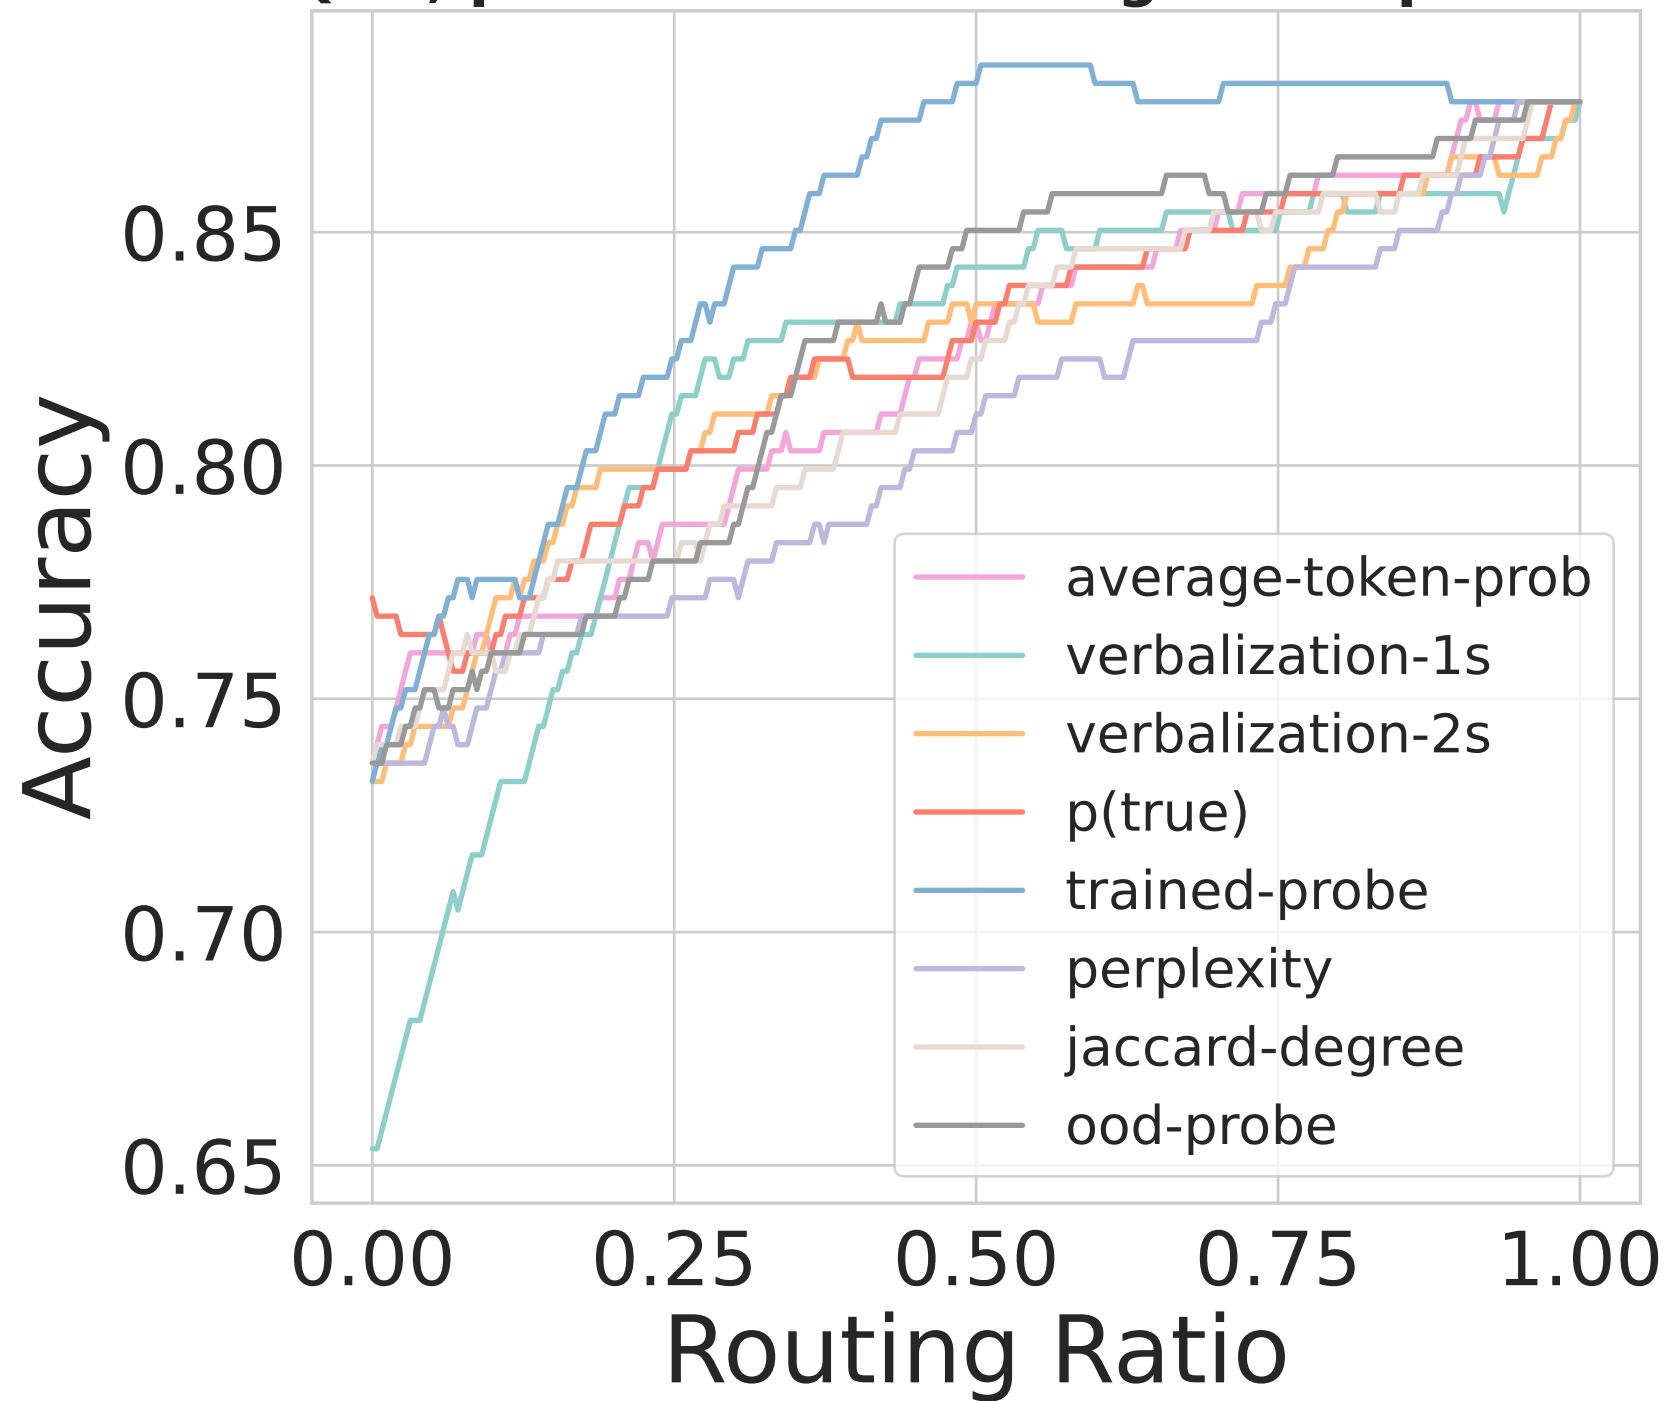

Supplement: supplementary_material [file rr_acc_aqua_phi-4-mini-reasoning_dsR1.pdf › Routing_SLM_LLMs/Uncertainty-based Routing/w_legend/to_dsR1/rr_acc_aqua_phi-4-mini-reasoning_dsR1.pdf]

**AQuA, qwen-2.5-7b to DeepSeek-R1**

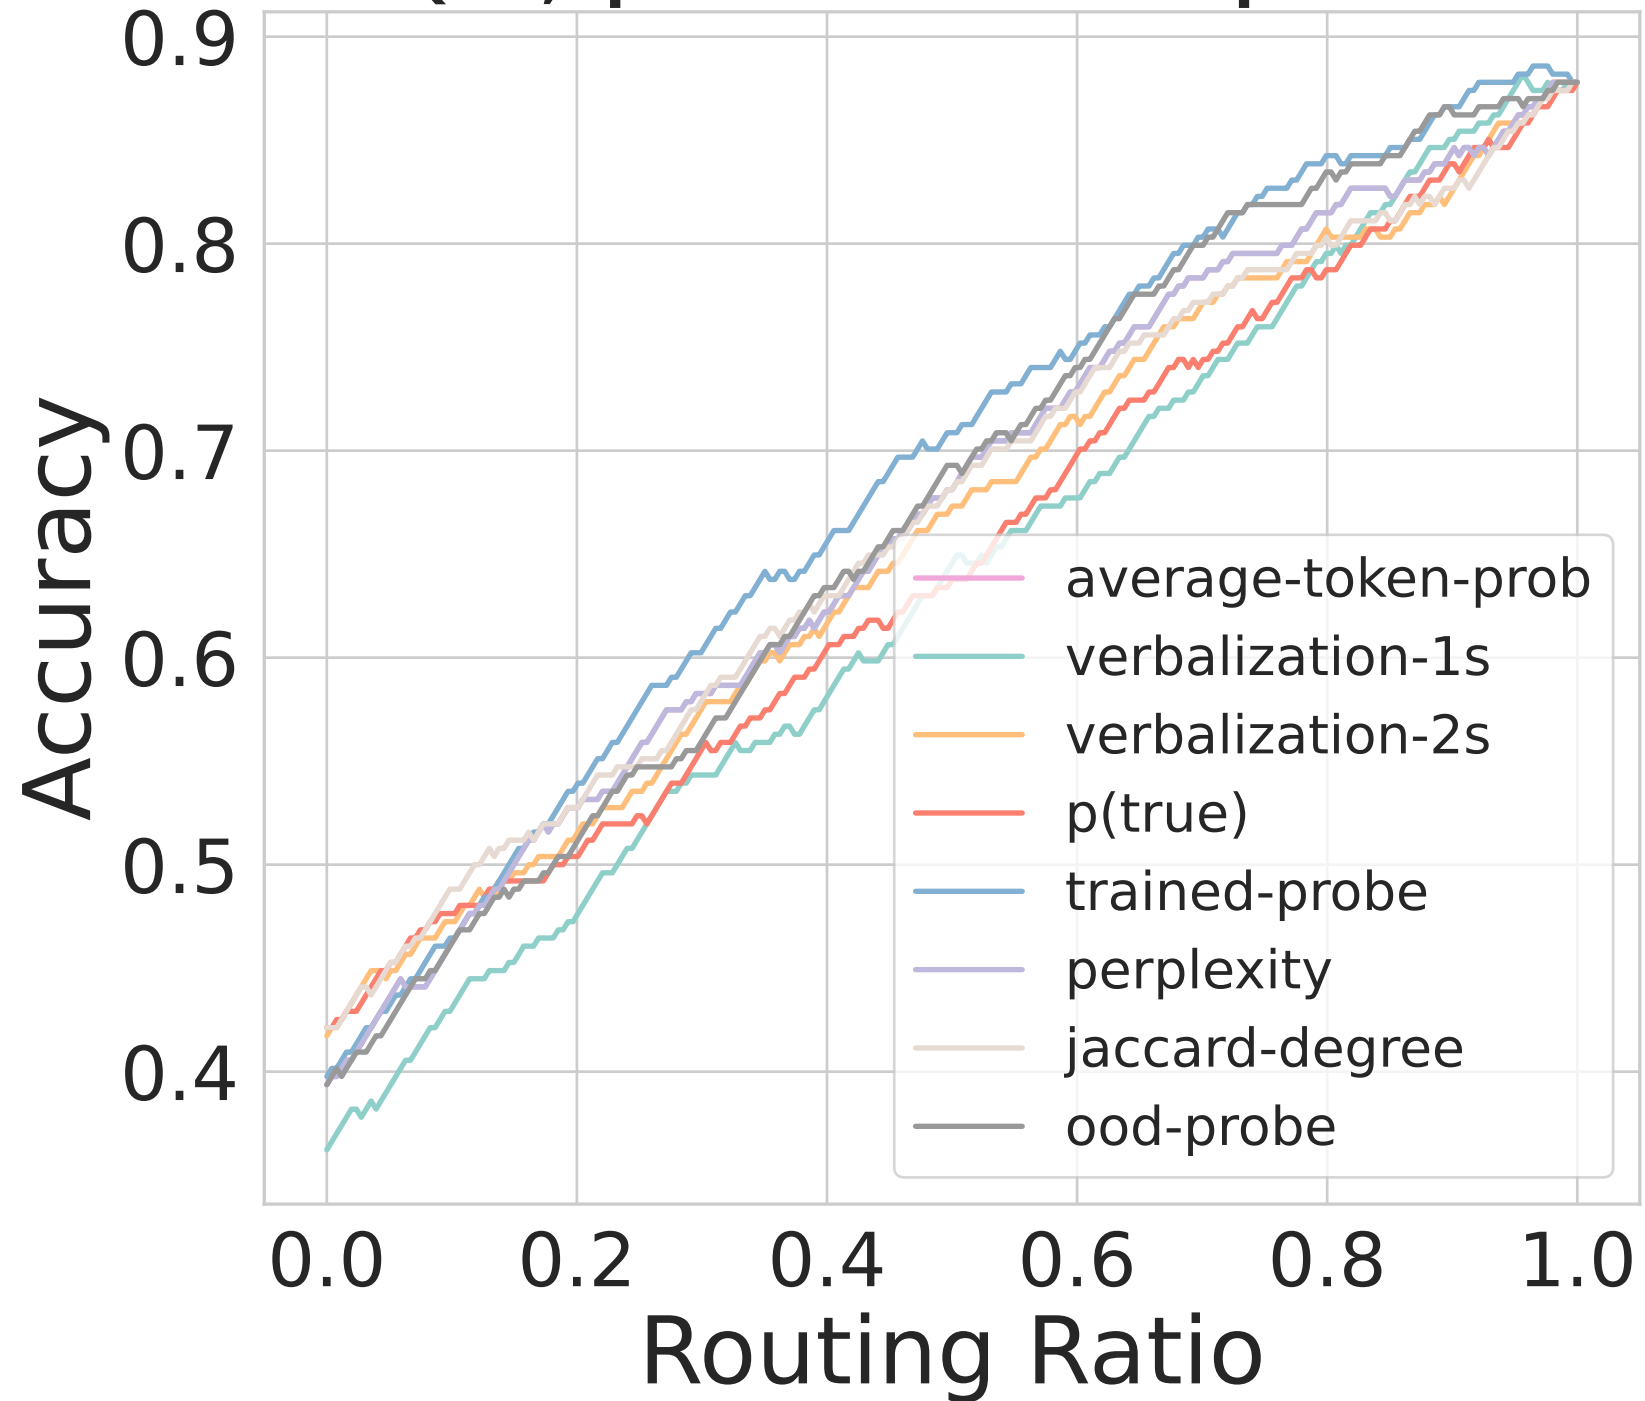

Supplement: supplementary_material [file rr_acc_aqua_qwen-2.5-7b_dsR1.pdf › Routing_SLM_LLMs/Uncertainty-based Routing/w_legend/to_dsR1/rr_acc_aqua_qwen-2.5-7b_dsR1.pdf]

# AQuA, rwkv to DeepSeek-R1

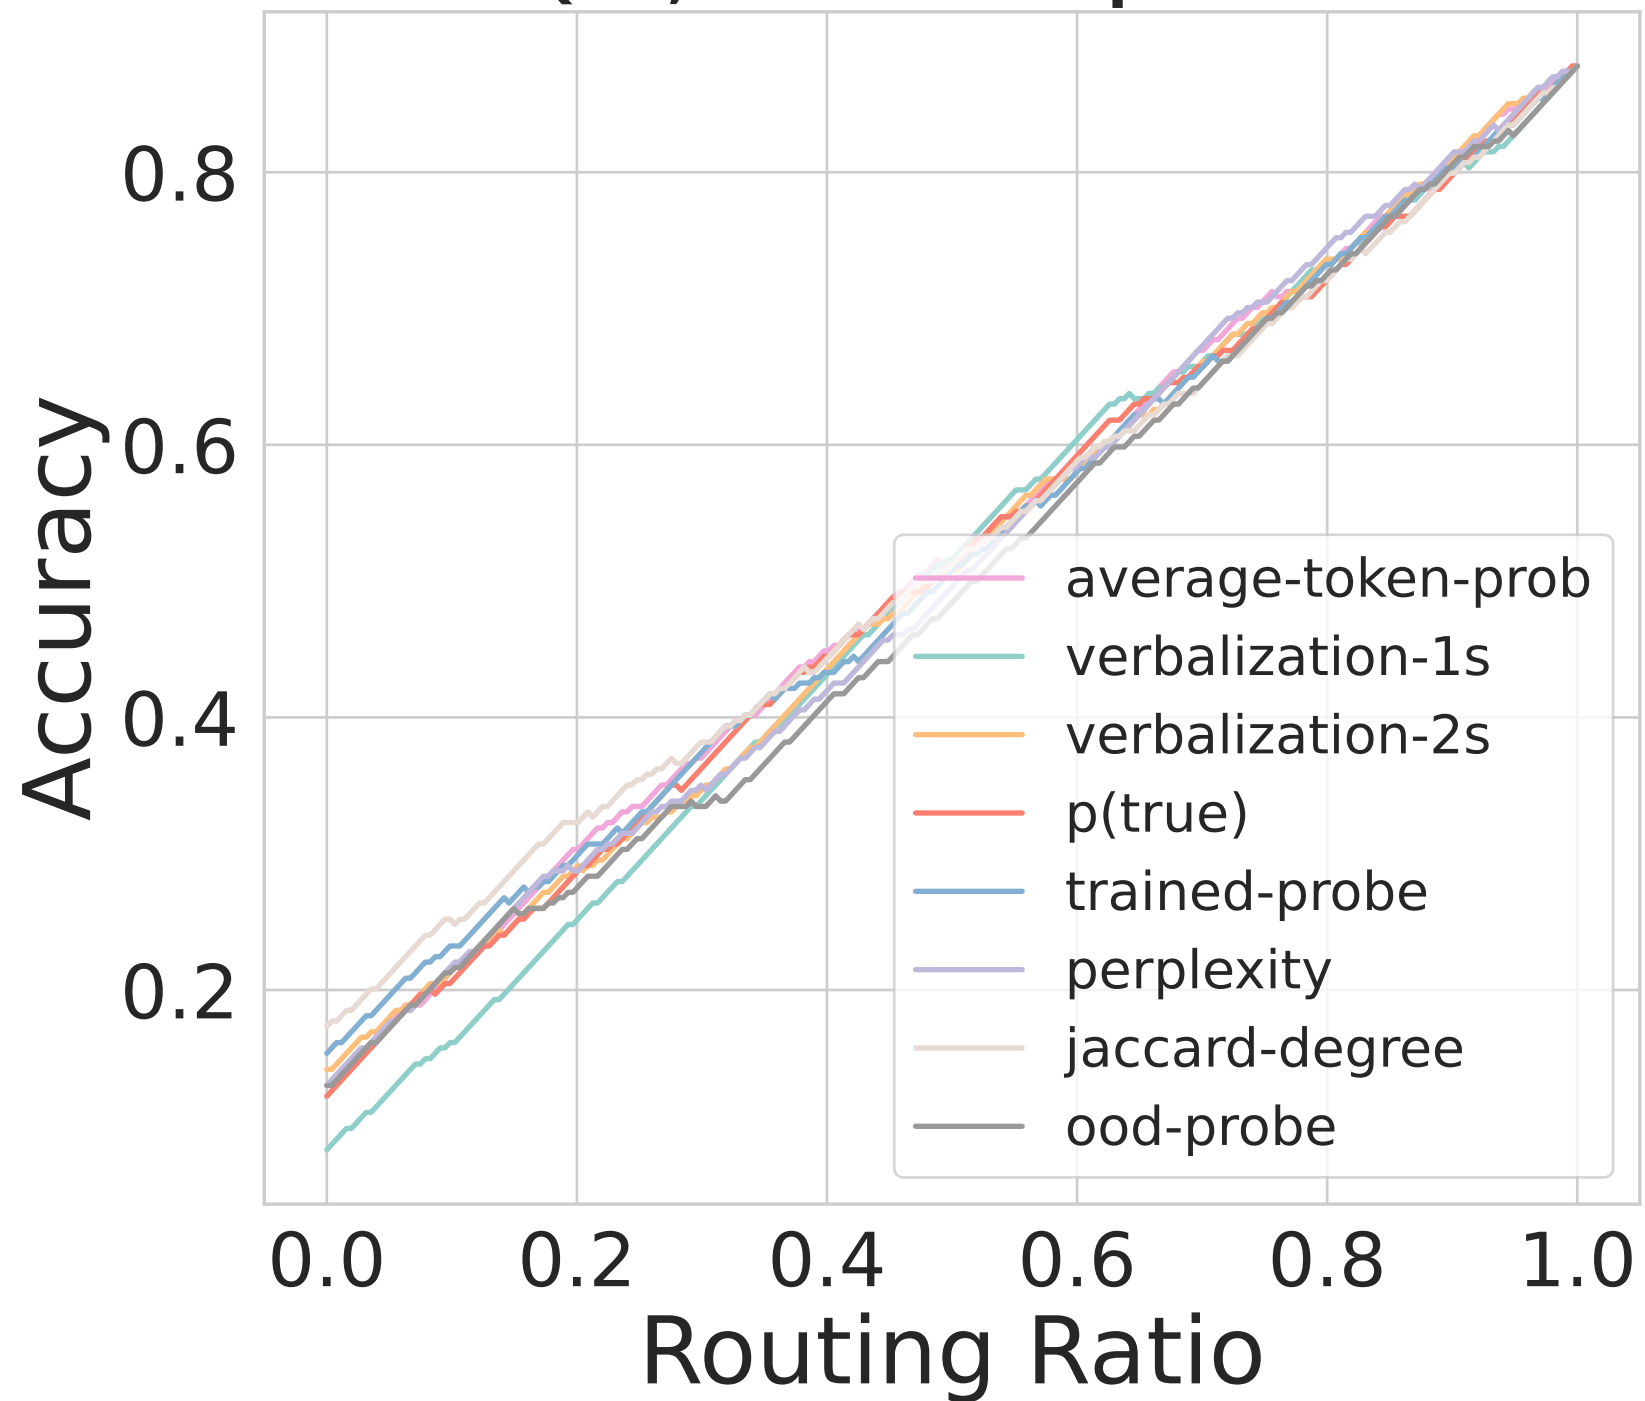

Supplement: supplementary_material [file rr_acc_aqua_rwkv_dsR1.pdf › Routing_SLM_LLMs/Uncertainty-based Routing/w_legend/to_dsR1/rr_acc_aqua_rwkv_dsR1.pdf]

# BoolQ, Qwen3-0.6B to DeepSeek-R1

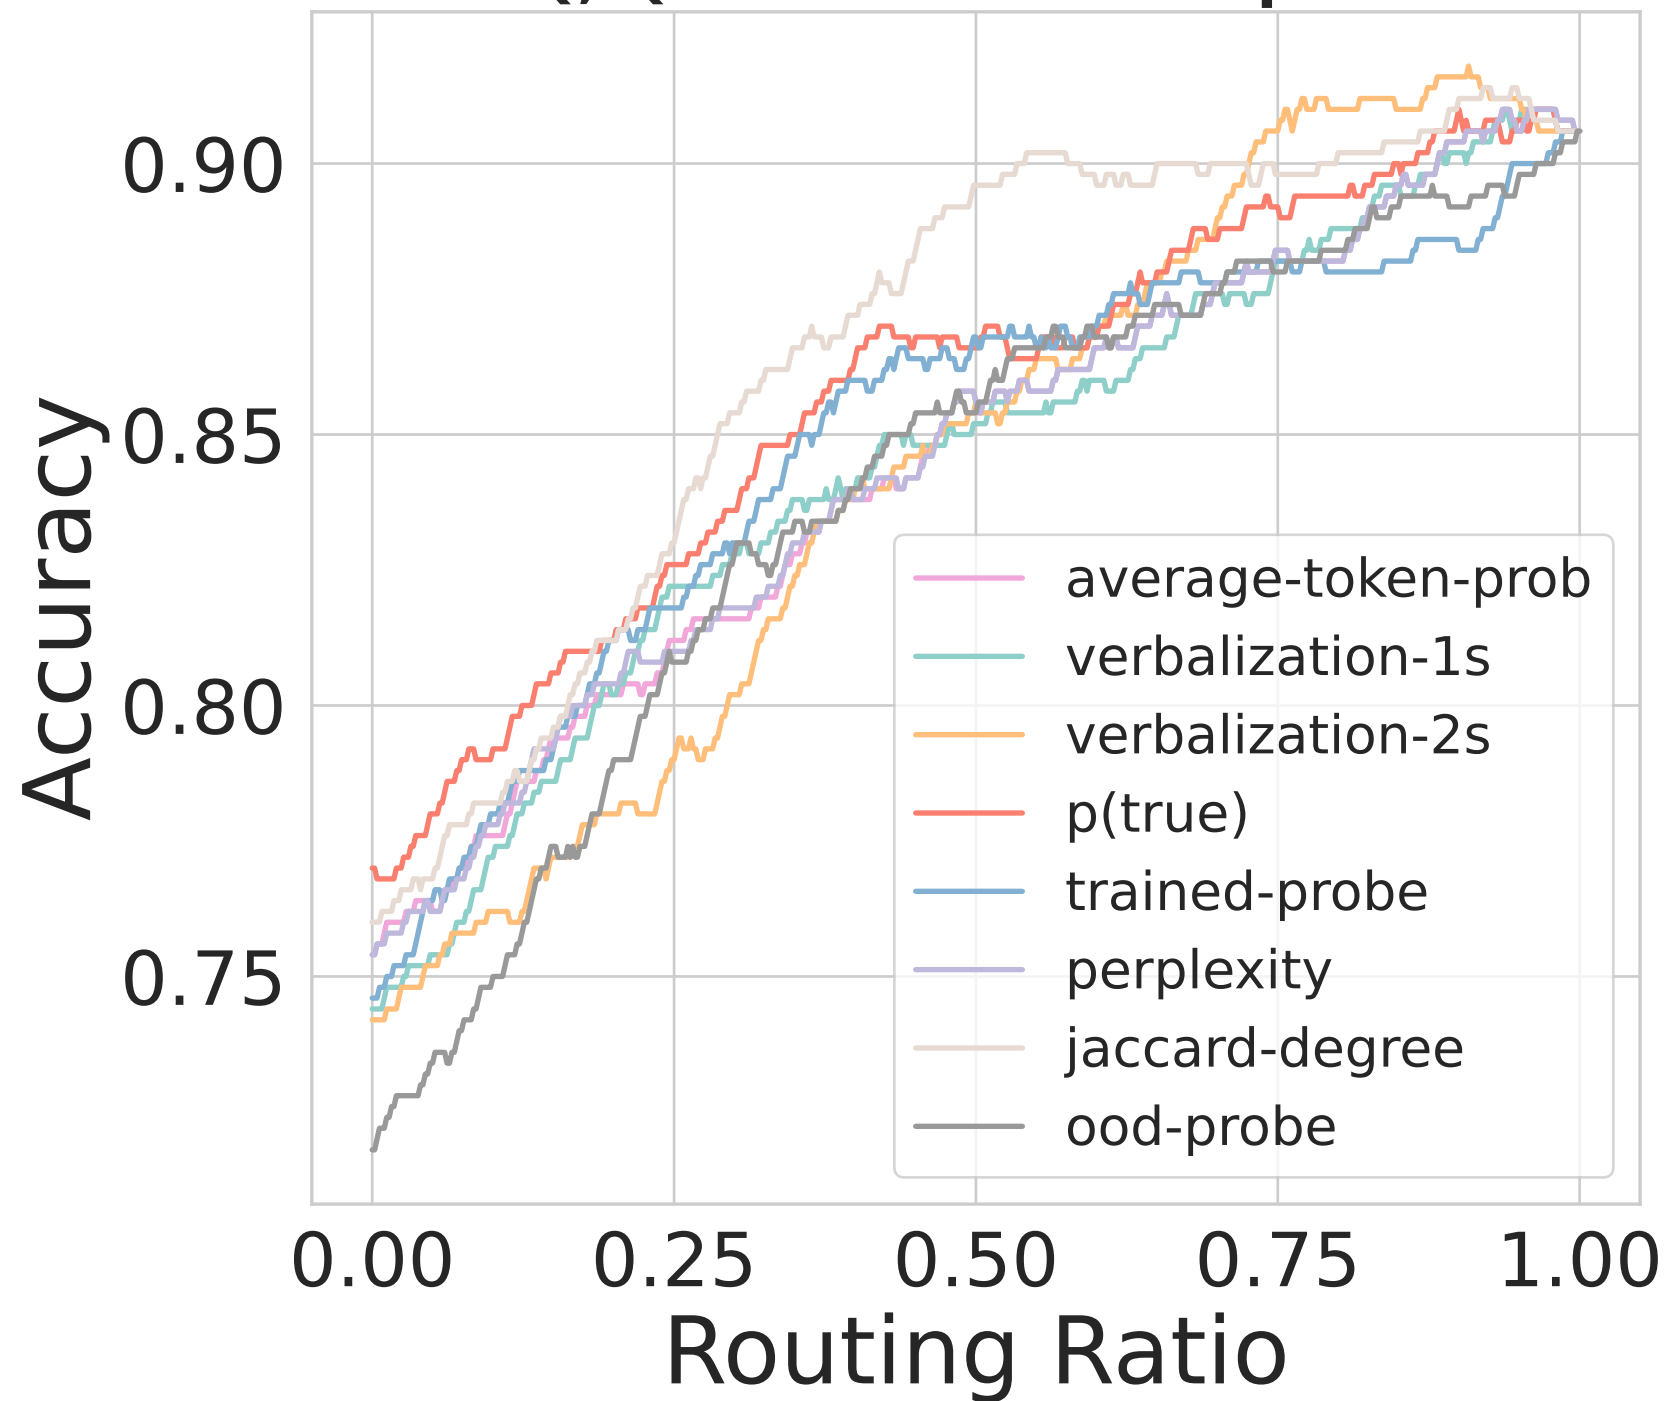

Supplement: supplementary_material [file rr_acc_boolq_Qwen3-0.6B_dsR1.pdf › Routing_SLM_LLMs/Uncertainty-based Routing/w_legend/to_dsR1/rr_acc_boolq_Qwen3-0.6B_dsR1.pdf]

# BoolQ, Qwen3-1.7B to DeepSeek-R1

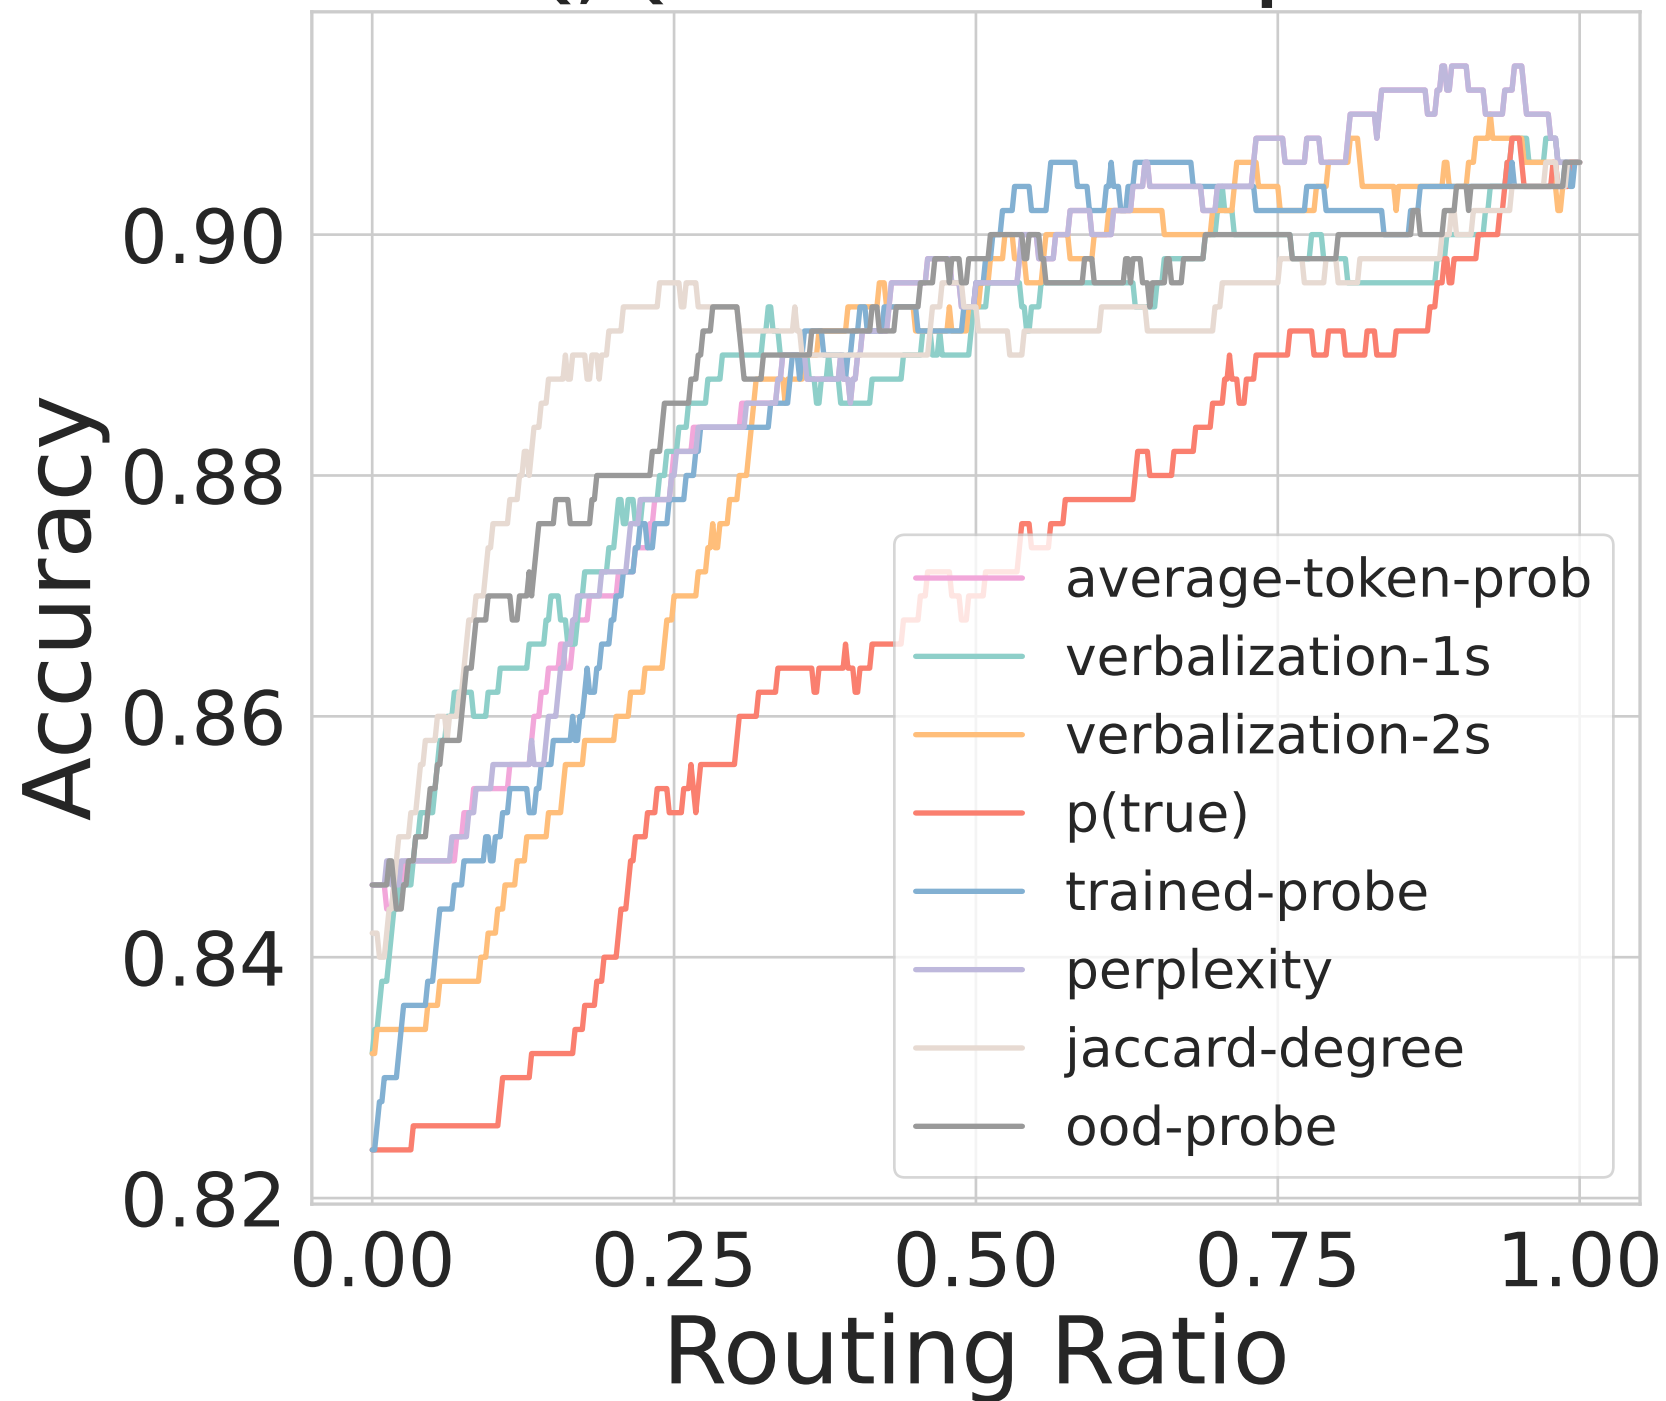

Supplement: supplementary_material [file rr_acc_boolq_Qwen3-1.7B_dsR1.pdf › Routing_SLM_LLMs/Uncertainty-based Routing/w_legend/to_dsR1/rr_acc_boolq_Qwen3-1.7B_dsR1.pdf]

**BoolQ, Qwen3-4B to DeepSeek-R1**

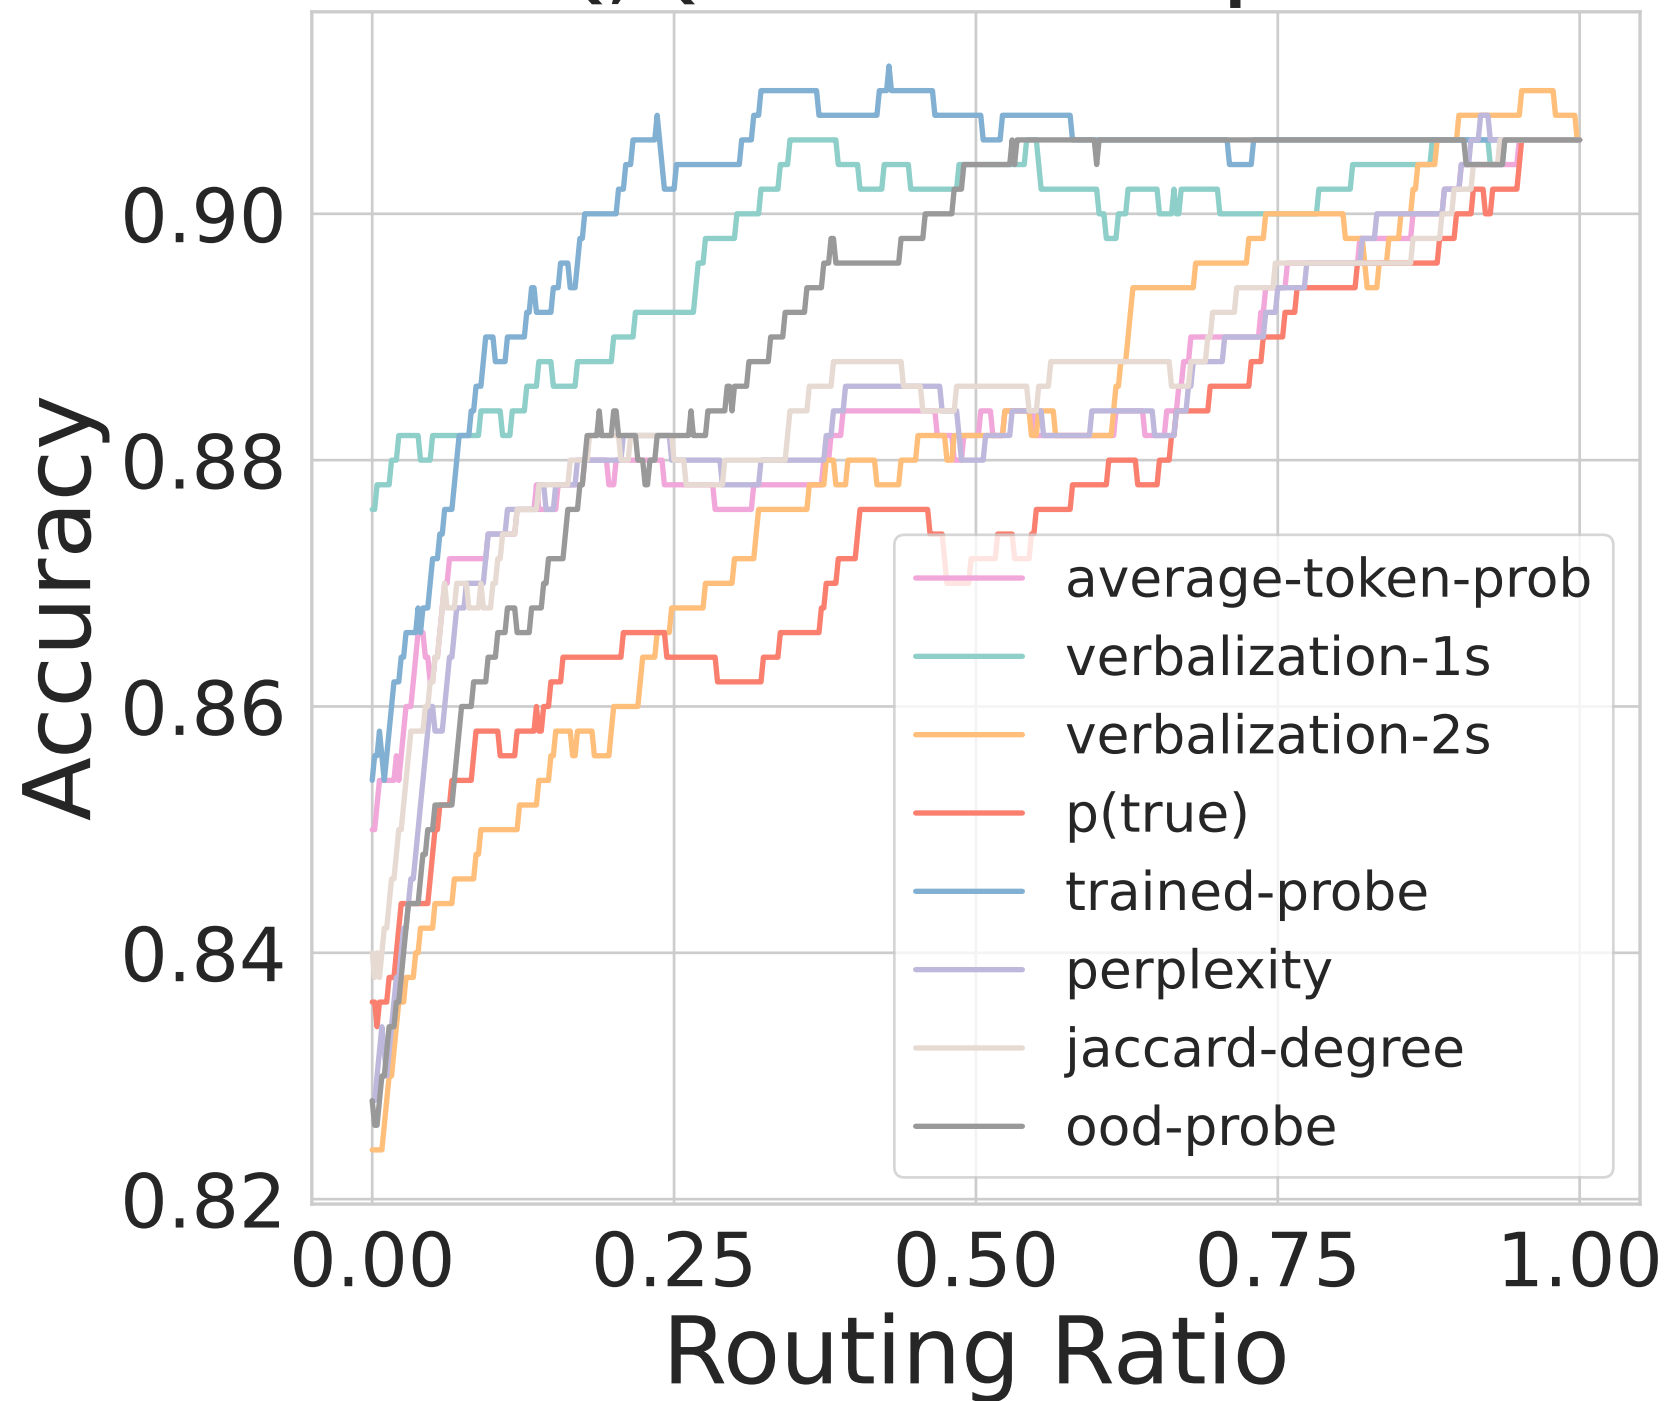

Supplement: supplementary_material [file rr_acc_boolq_Qwen3-4B_dsR1.pdf › Routing_SLM_LLMs/Uncertainty-based Routing/w_legend/to_dsR1/rr_acc_boolq_Qwen3-4B_dsR1.pdf]

## BoolQ, granite-3.1-8b to DeepSeek-R1

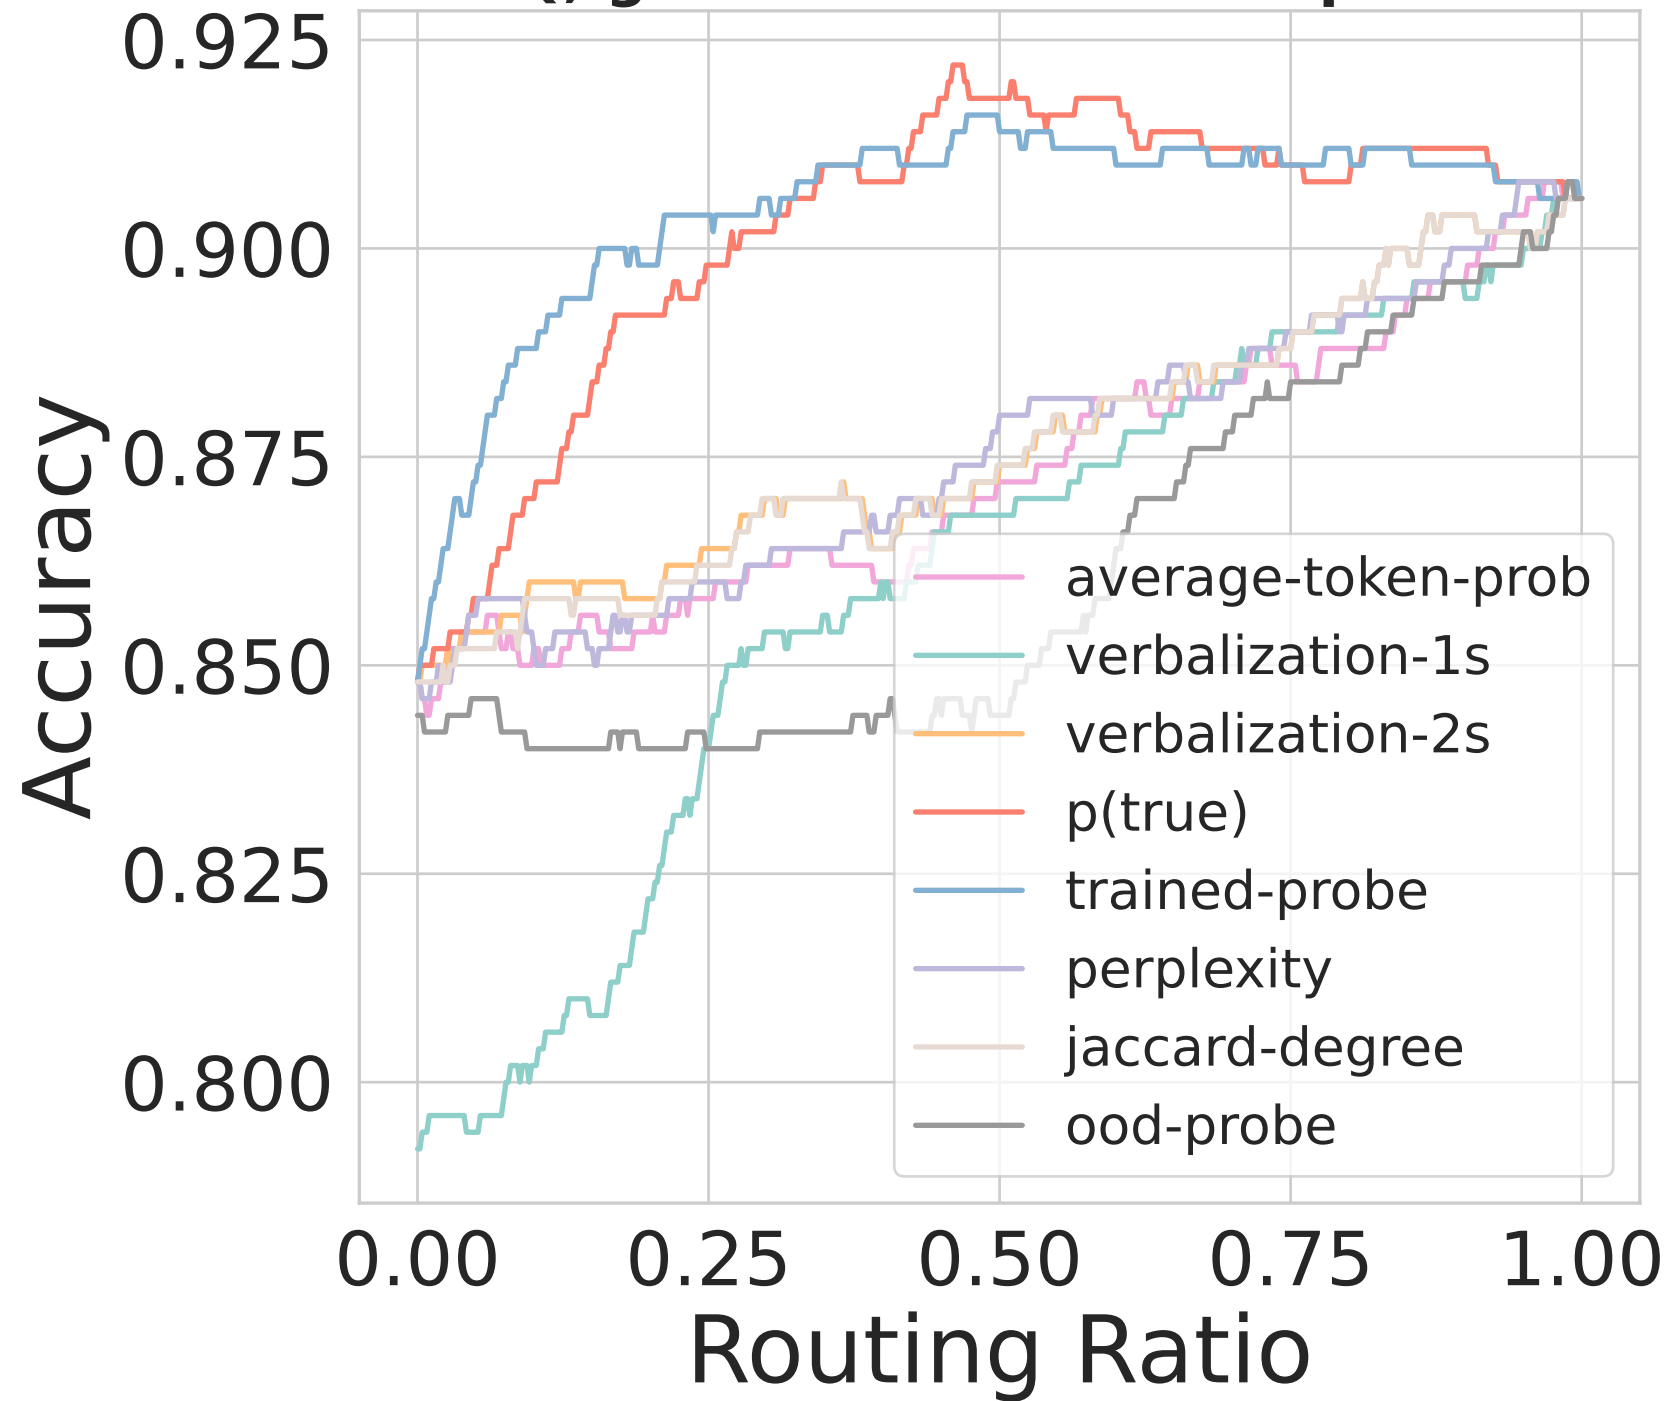

Supplement: supplementary_material [file rr_acc_boolq_granite-3.1-8b_dsR1.pdf › Routing_SLM_LLMs/Uncertainty-based Routing/w_legend/to_dsR1/rr_acc_boolq_granite-3.1-8b_dsR1.pdf]

# BoolQ, llama-3.1-8b to DeepSeek-R1

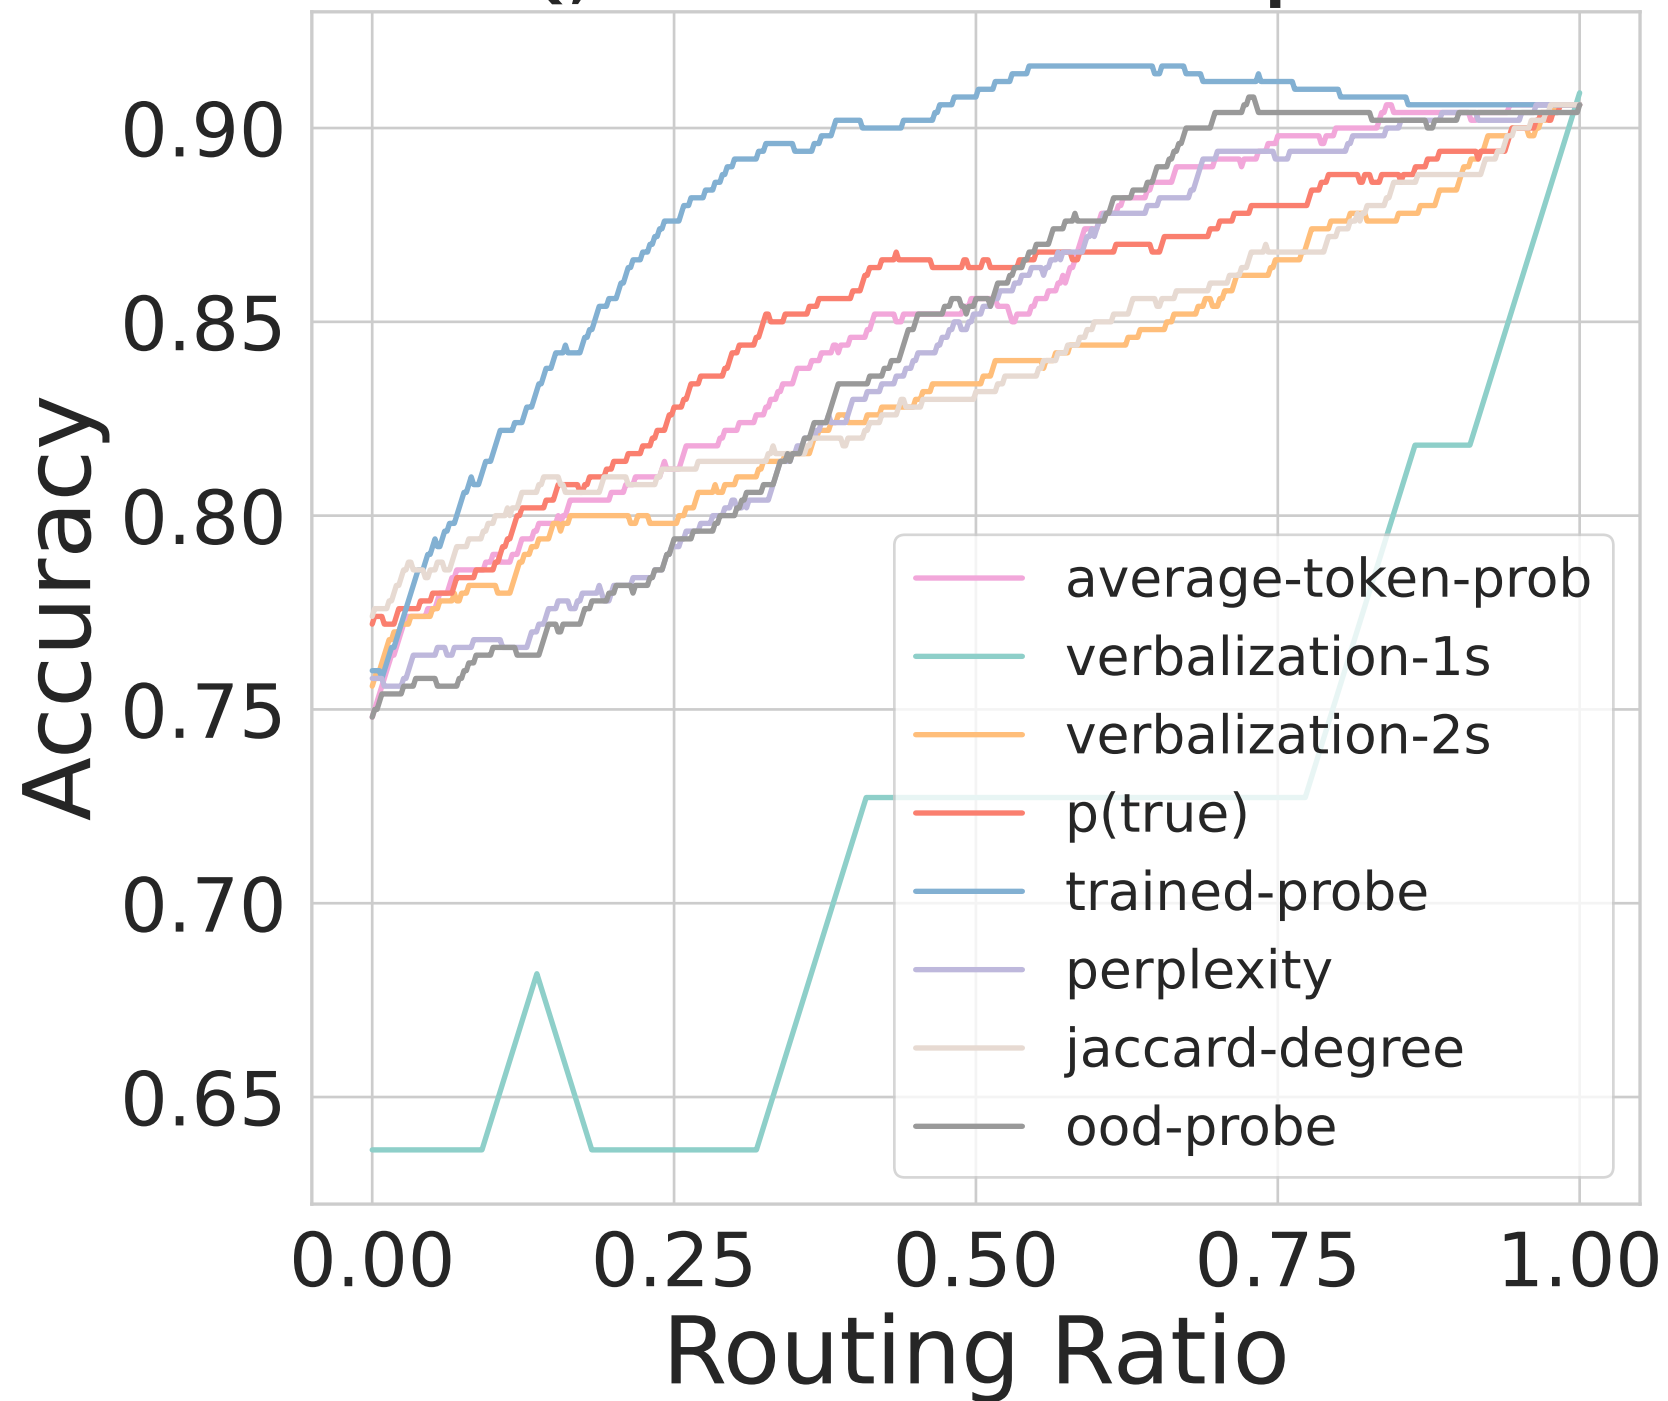

Supplement: supplementary_material [file rr_acc_boolq_llama-3.1-8b_dsR1.pdf › Routing_SLM_LLMs/Uncertainty-based Routing/w_legend/to_dsR1/rr_acc_boolq_llama-3.1-8b_dsR1.pdf]

# BoolQ, llama-3.2-1b to DeepSeek-R1

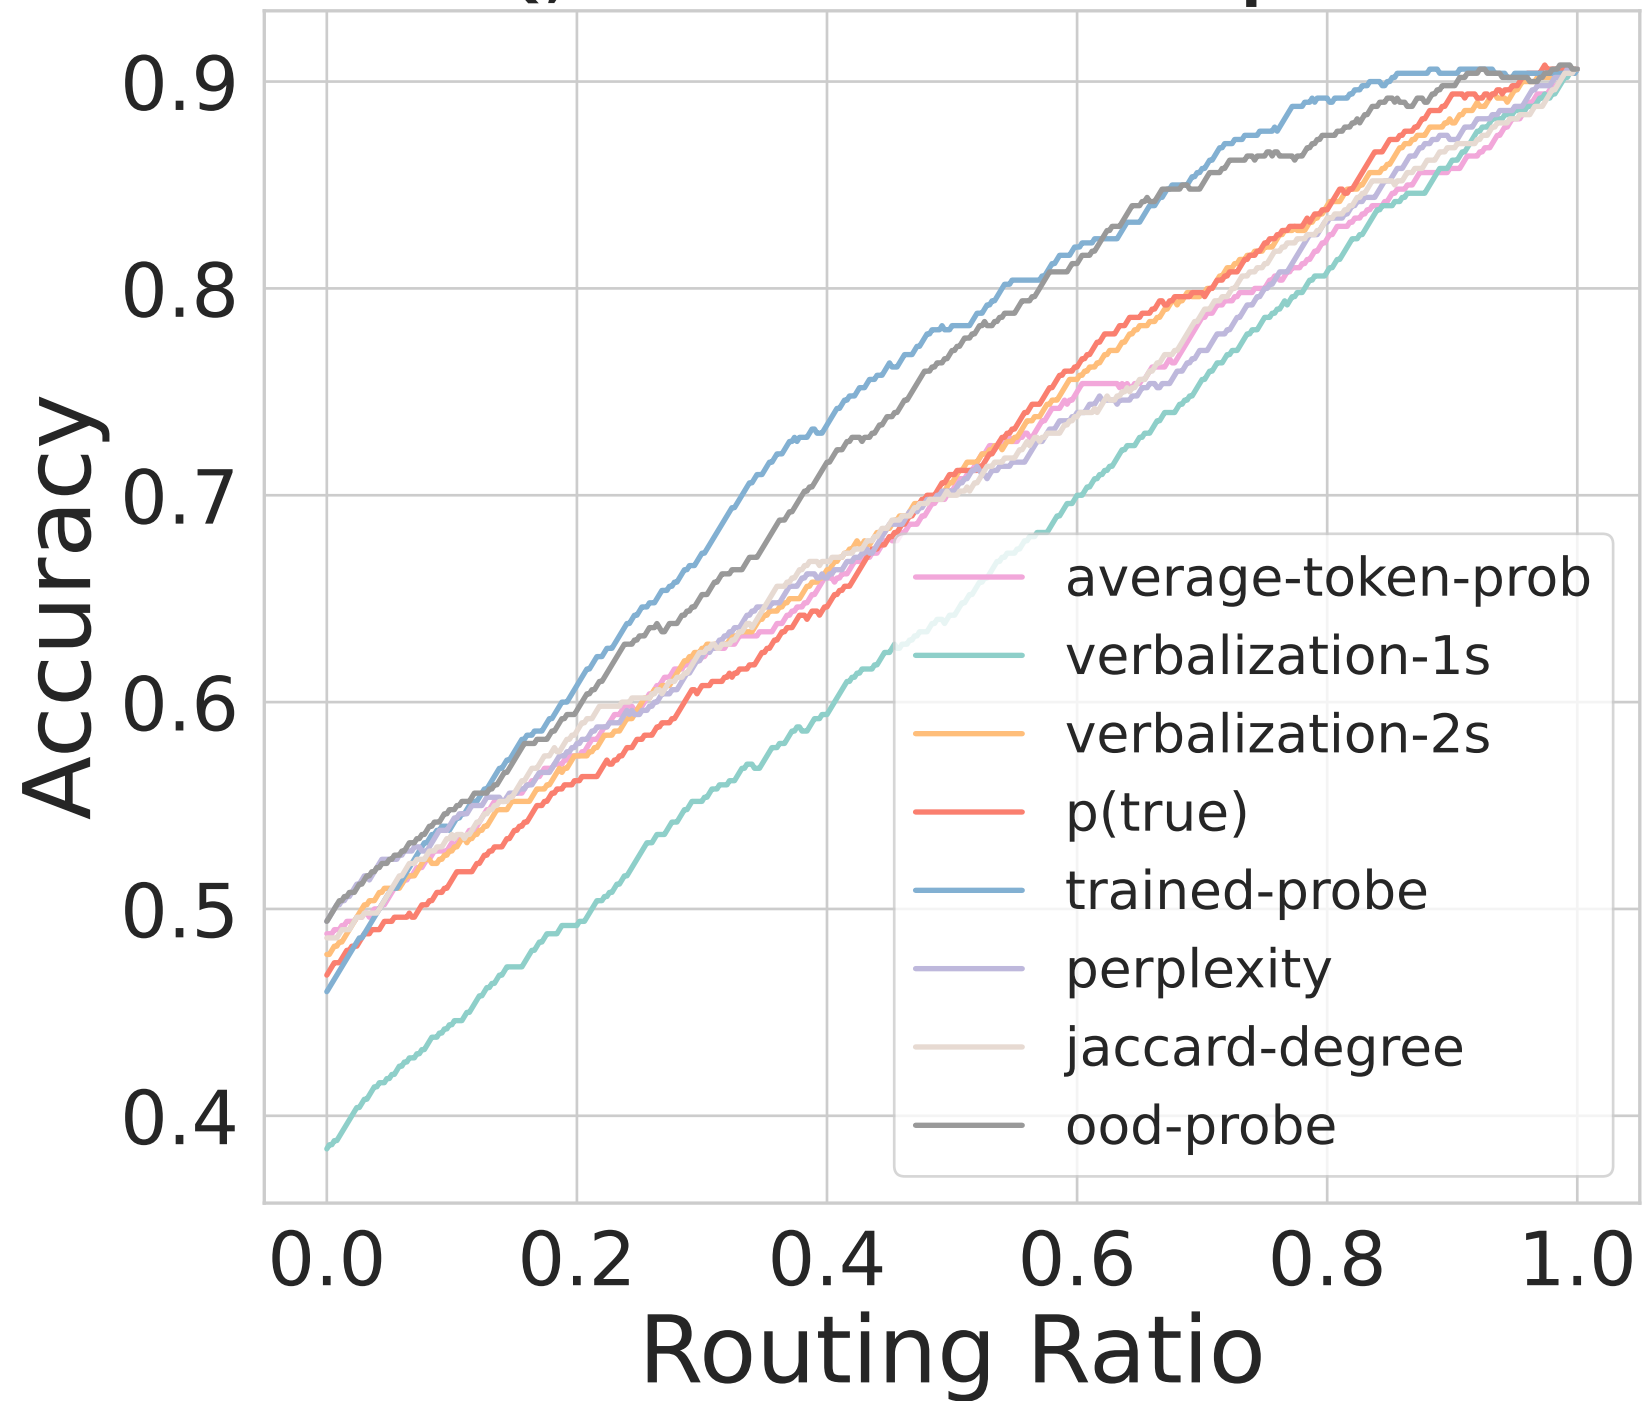

Supplement: supplementary_material [file rr_acc_boolq_llama-3.2-1b_dsR1.pdf › Routing_SLM_LLMs/Uncertainty-based Routing/w_legend/to_dsR1/rr_acc_boolq_llama-3.2-1b_dsR1.pdf]

**BoolQ, llama-3.2-3b to DeepSeek-R1**

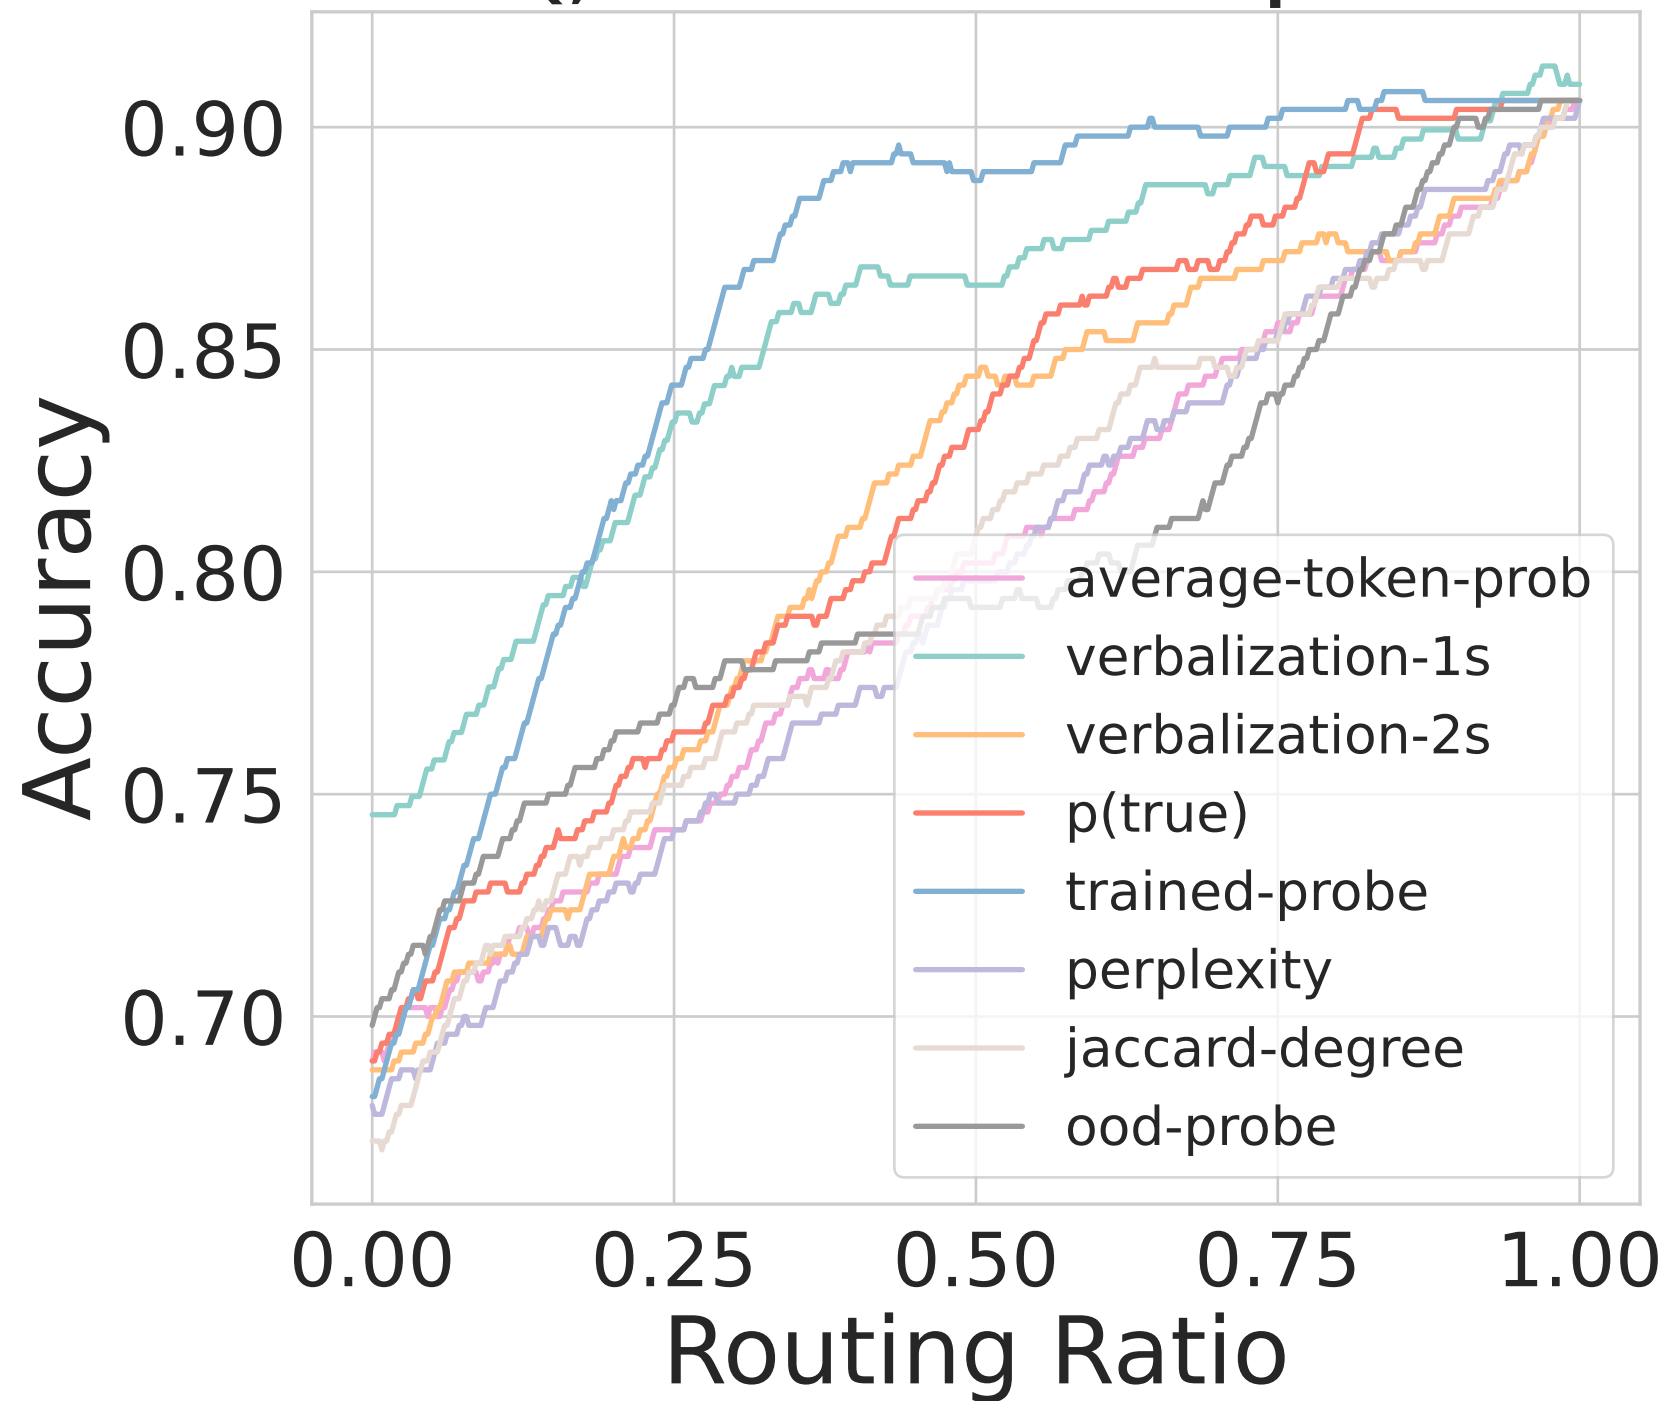

Supplement: supplementary_material [file rr_acc_boolq_llama-3.2-3b_dsR1.pdf › Routing_SLM_LLMs/Uncertainty-based Routing/w_legend/to_dsR1/rr_acc_boolq_llama-3.2-3b_dsR1.pdf]

# BoolQ, mistral-7b to DeepSeek-R1

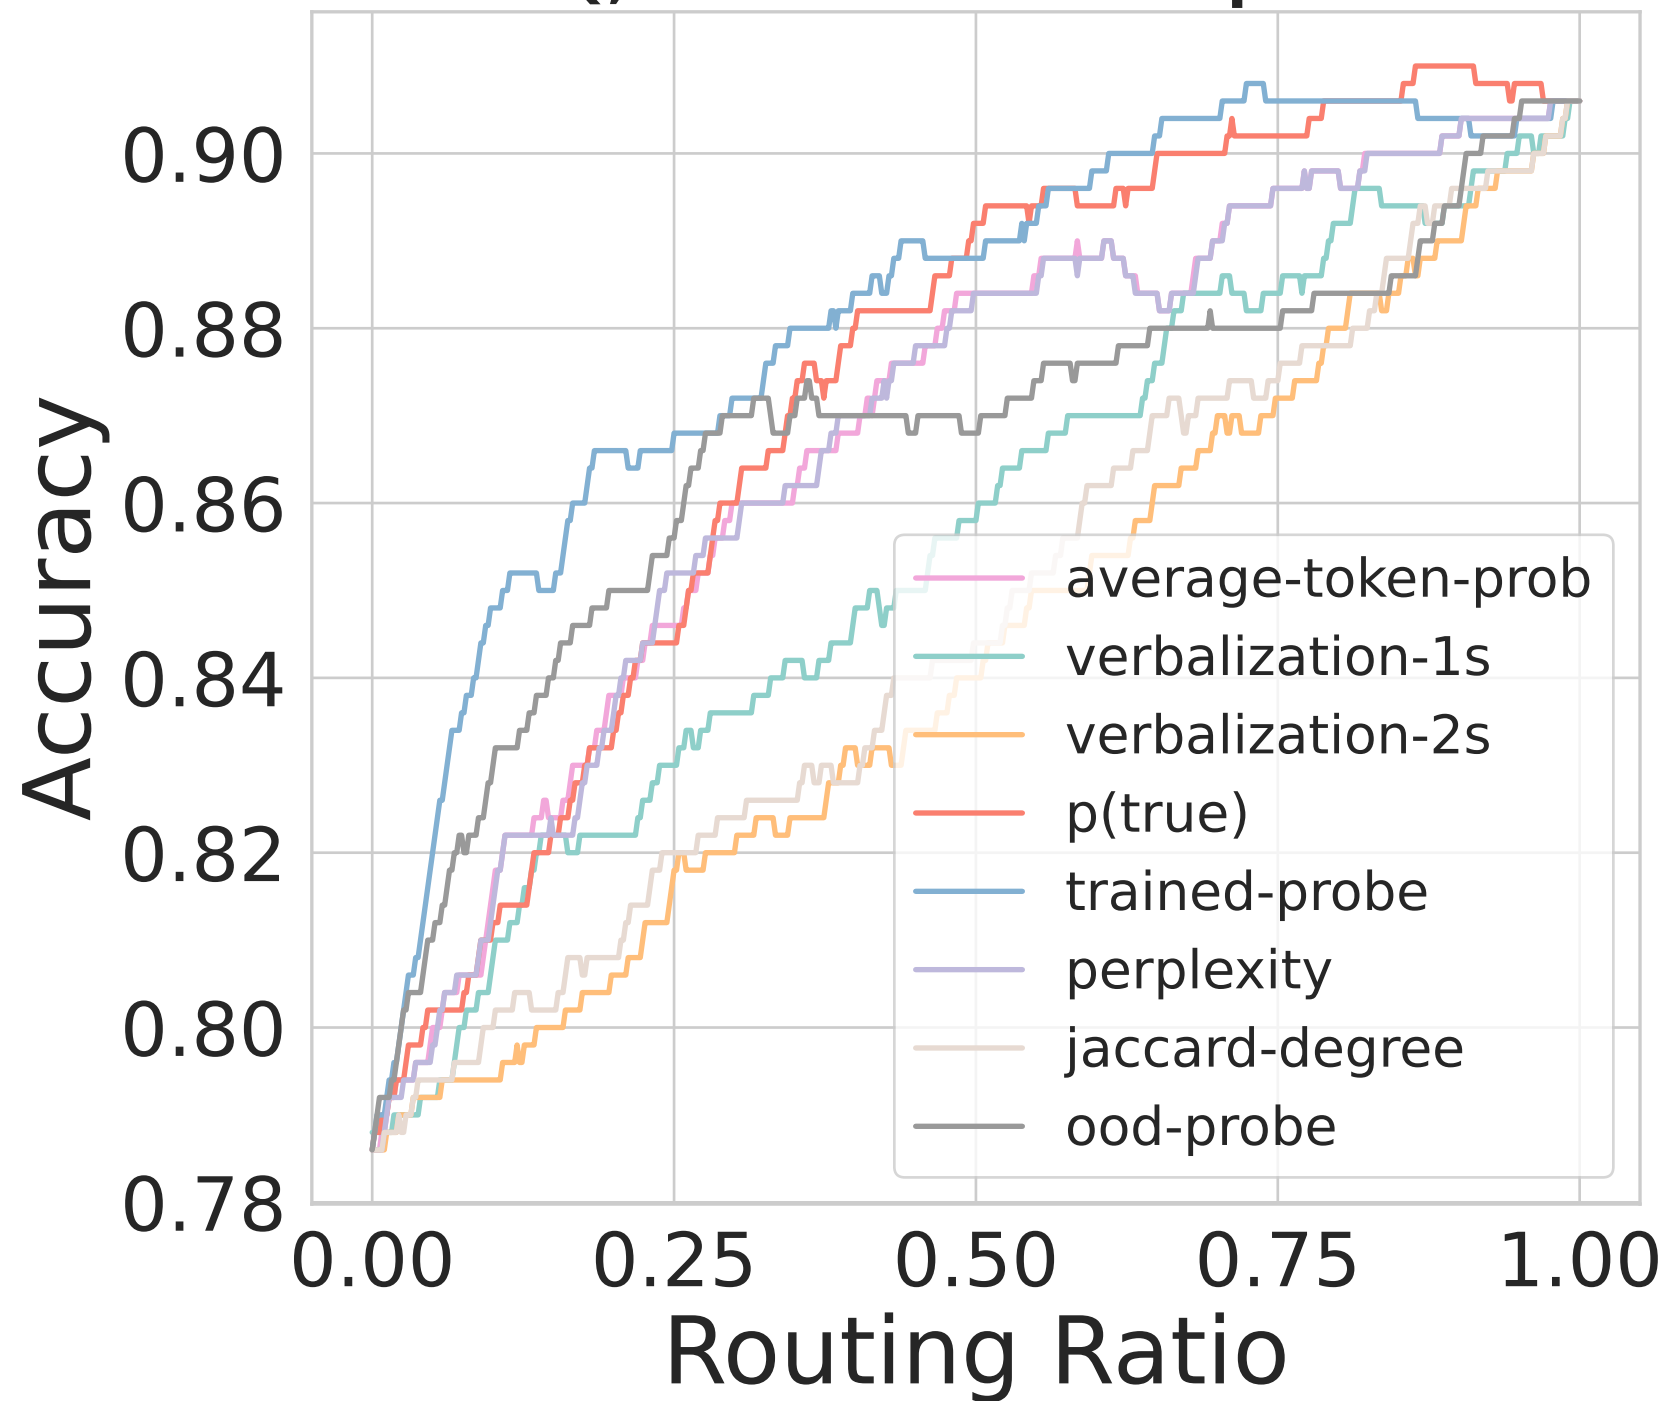

Supplement: supplementary_material [file rr_acc_boolq_mistral-7b_dsR1.pdf › Routing_SLM_LLMs/Uncertainty-based Routing/w_legend/to_dsR1/rr_acc_boolq_mistral-7b_dsR1.pdf]

**BoolQ, phi-3.5-mini to DeepSeek-R1**

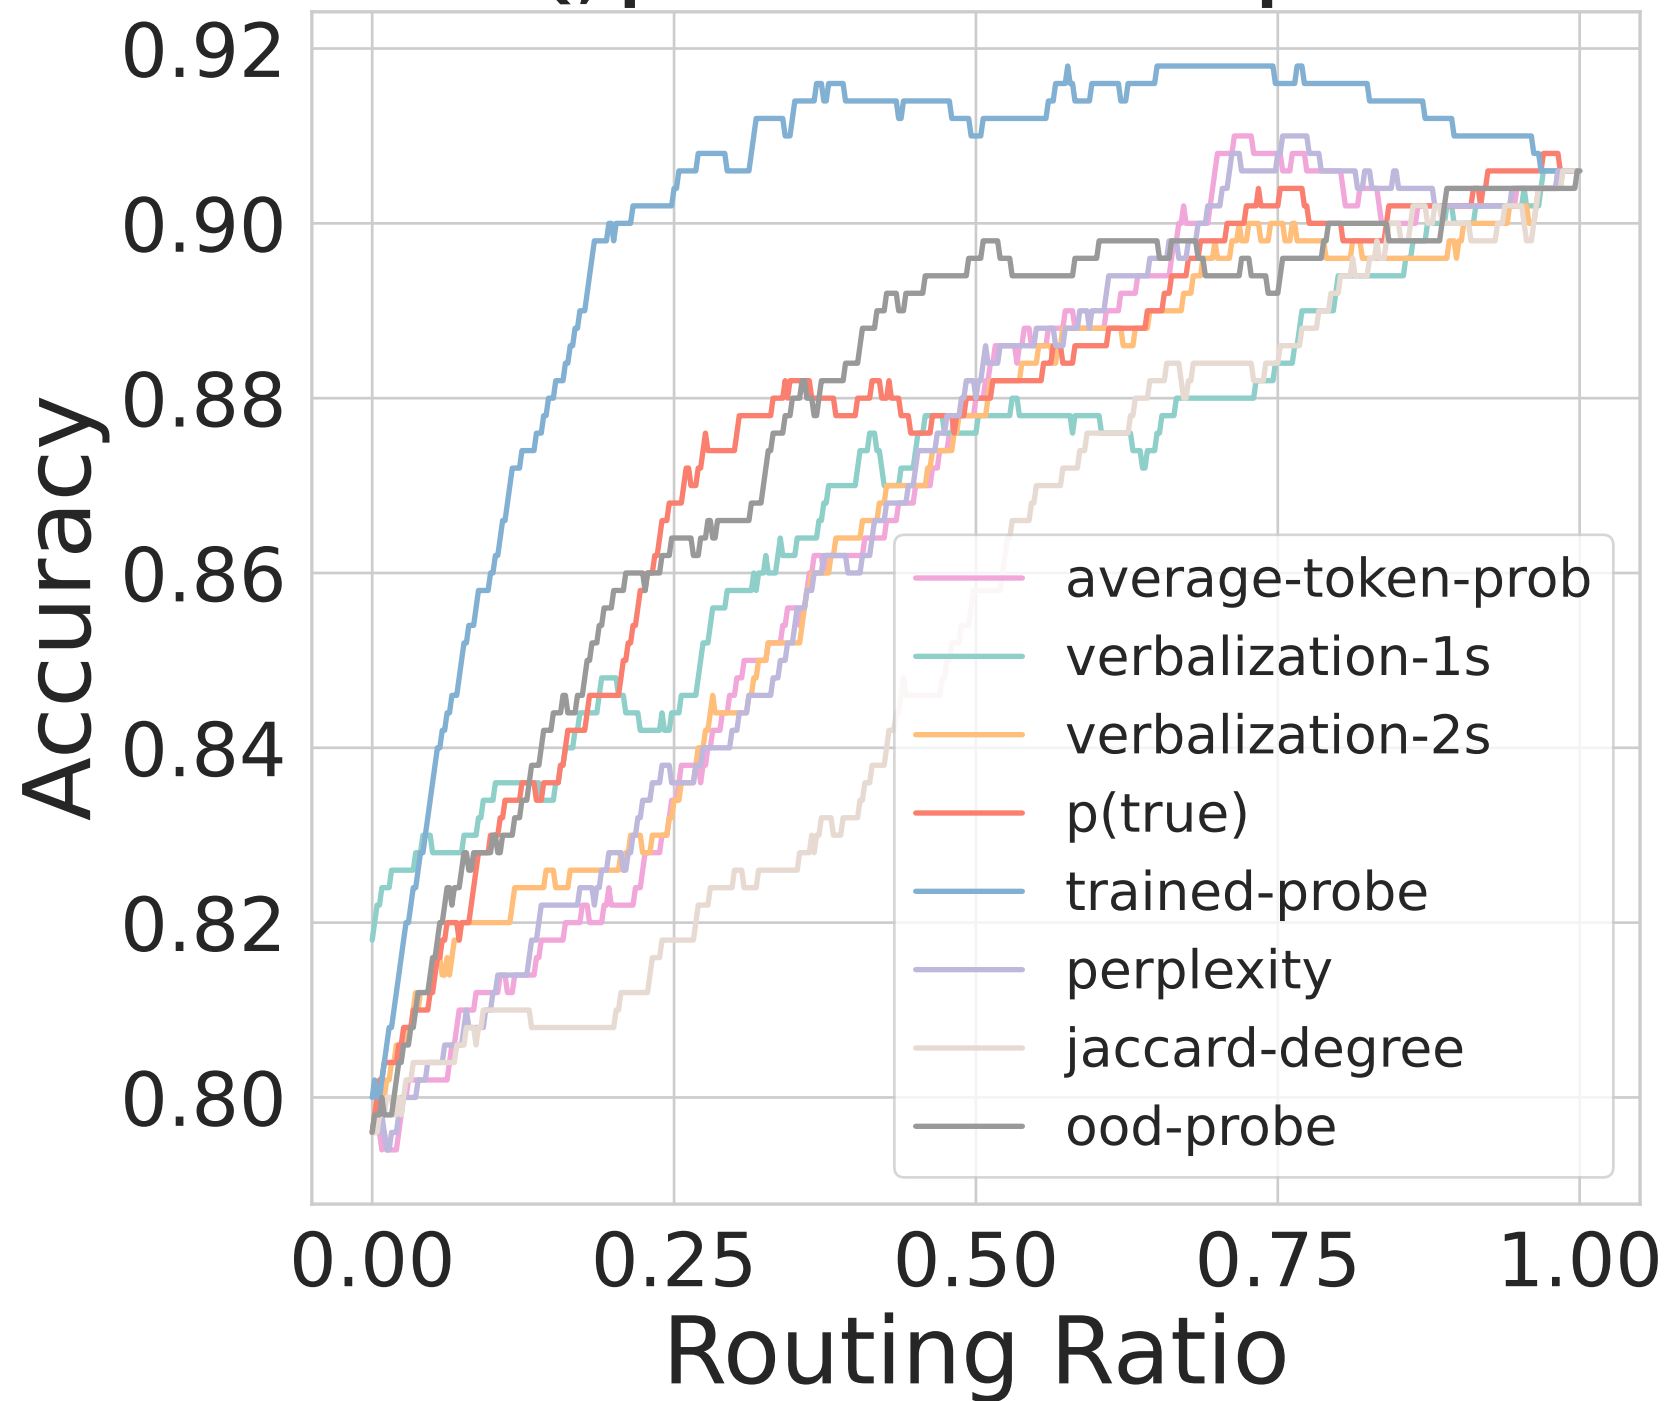

Supplement: supplementary_material [file rr_acc_boolq_phi-3.5-mini_dsR1.pdf › Routing_SLM_LLMs/Uncertainty-based Routing/w_legend/to_dsR1/rr_acc_boolq_phi-3.5-mini_dsR1.pdf]

# BoolQ, phi-4-mini-reasoning to DeepSeek-R1

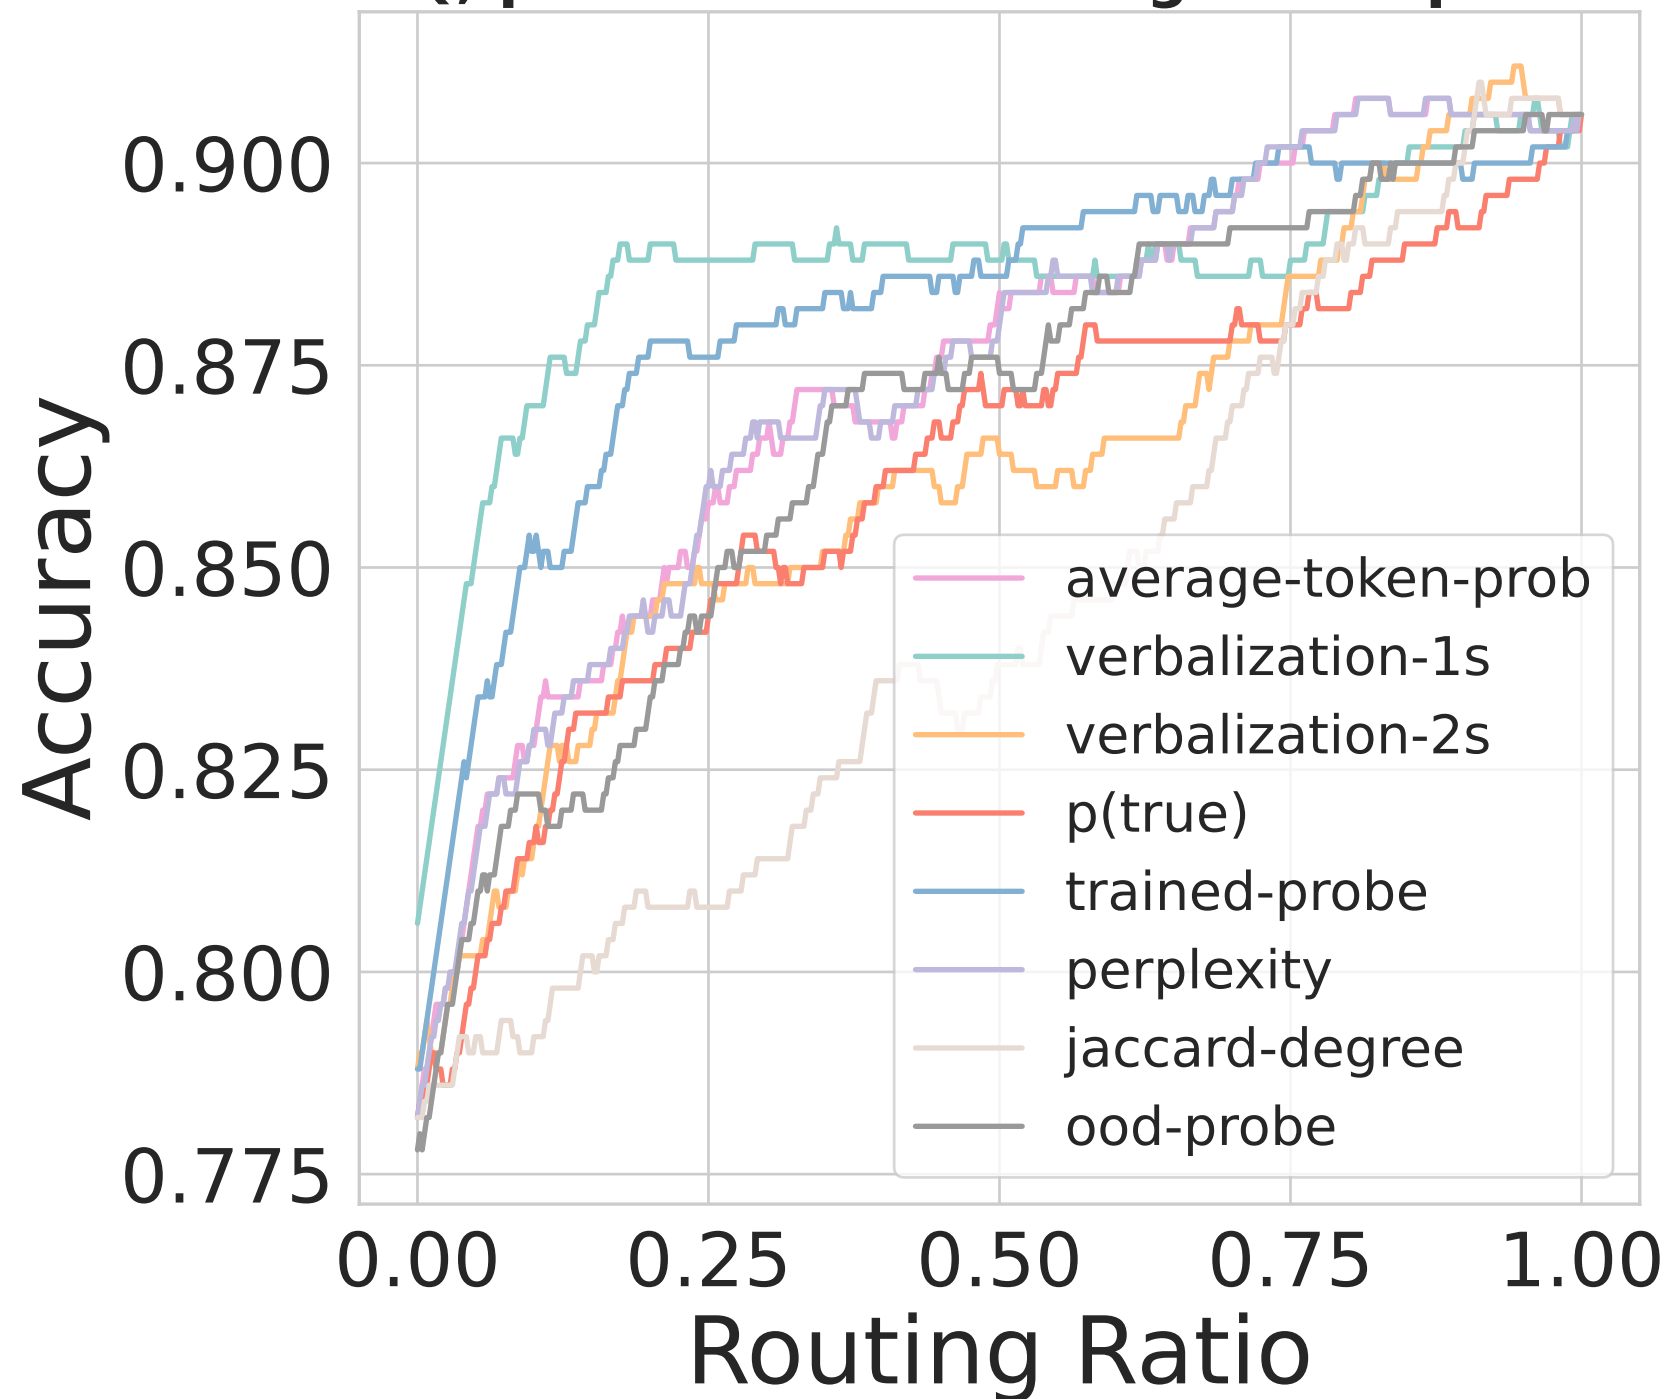

Supplement: supplementary_material [file rr_acc_boolq_phi-4-mini-reasoning_dsR1.pdf › Routing_SLM_LLMs/Uncertainty-based Routing/w_legend/to_dsR1/rr_acc_boolq_phi-4-mini-reasoning_dsR1.pdf]

# BoolQ, rwkv to DeepSeek-R1

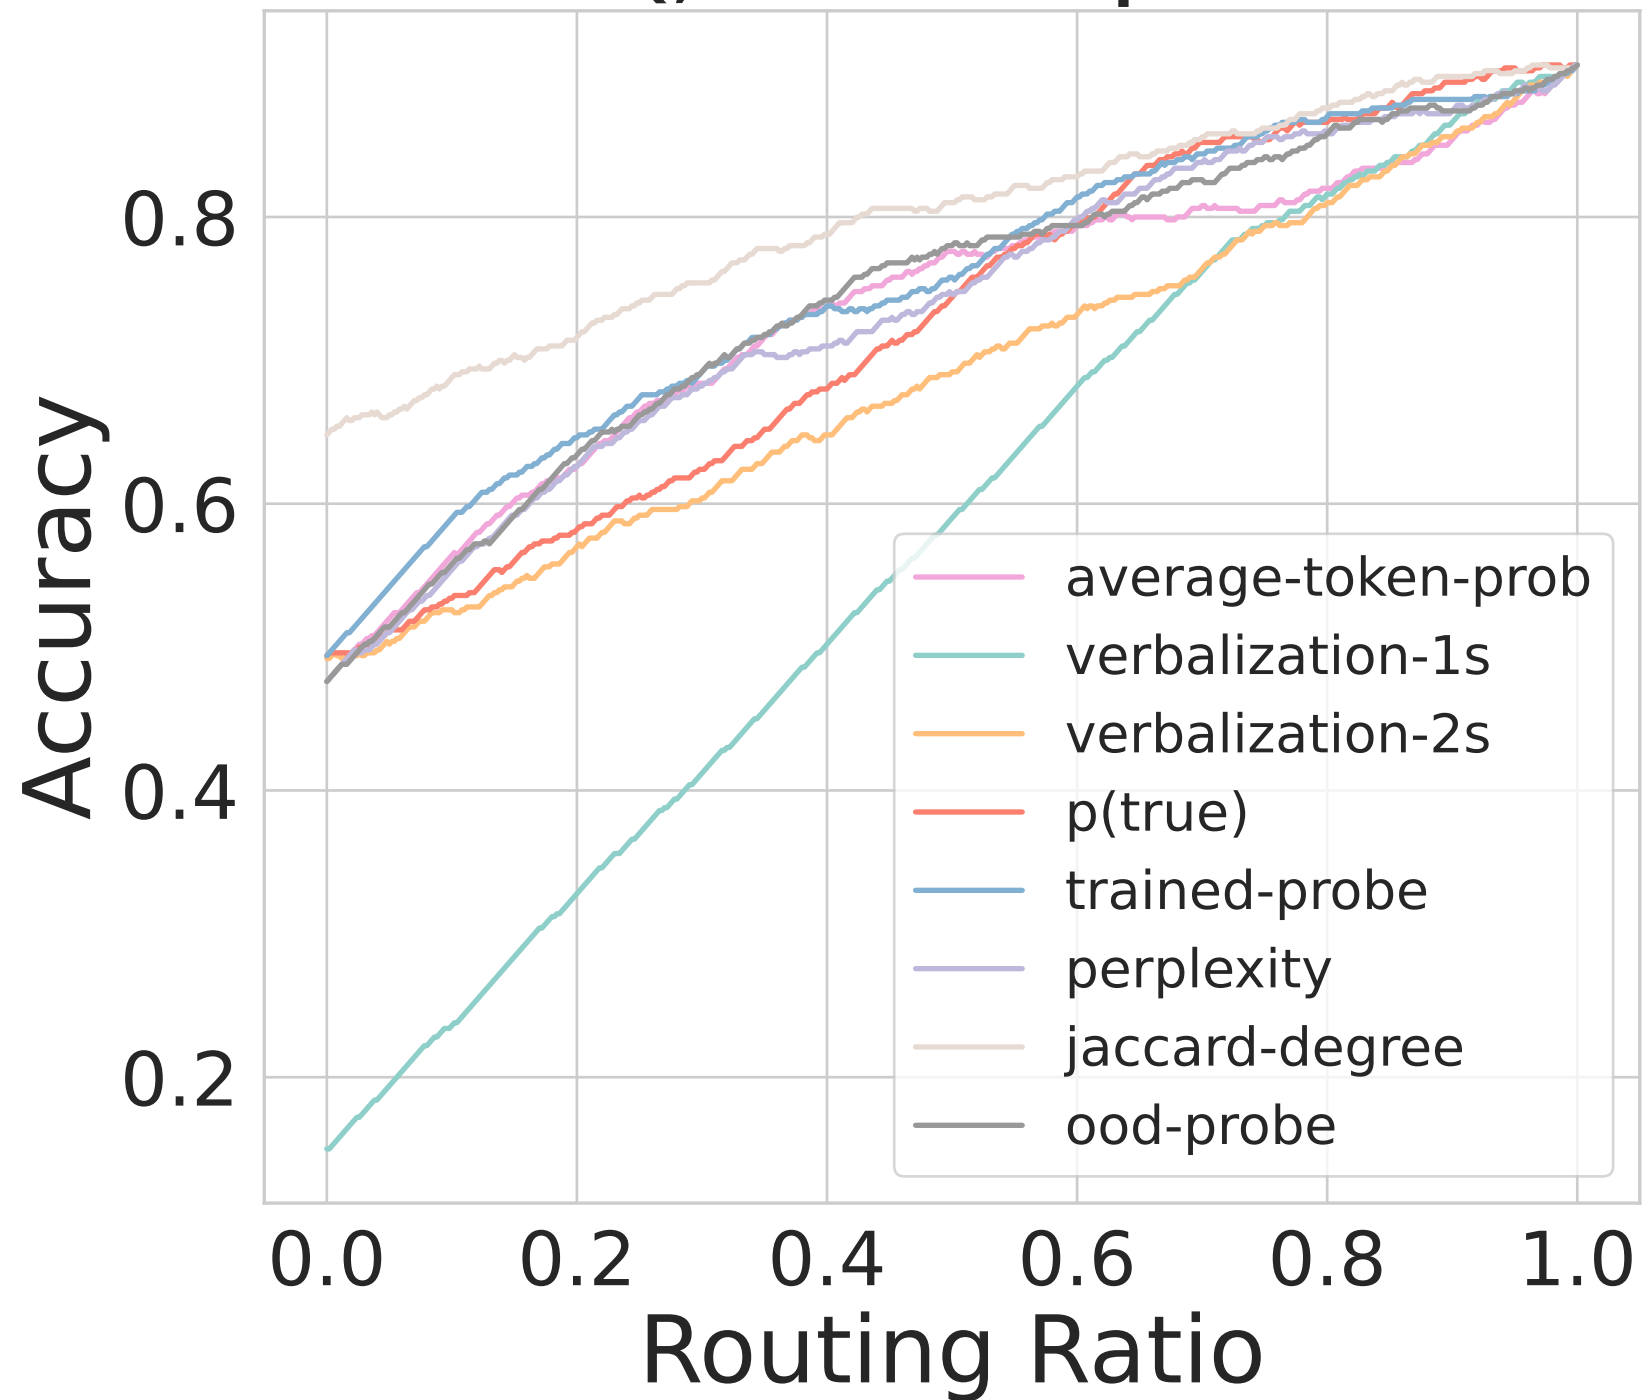

Supplement: supplementary_material [file rr_acc_boolq_rwkv_dsR1.pdf › Routing_SLM_LLMs/Uncertainty-based Routing/w_legend/to_dsR1/rr_acc_boolq_rwkv_dsR1.pdf]

# CoQA, Qwen3-0.6B to DeepSeek-R1

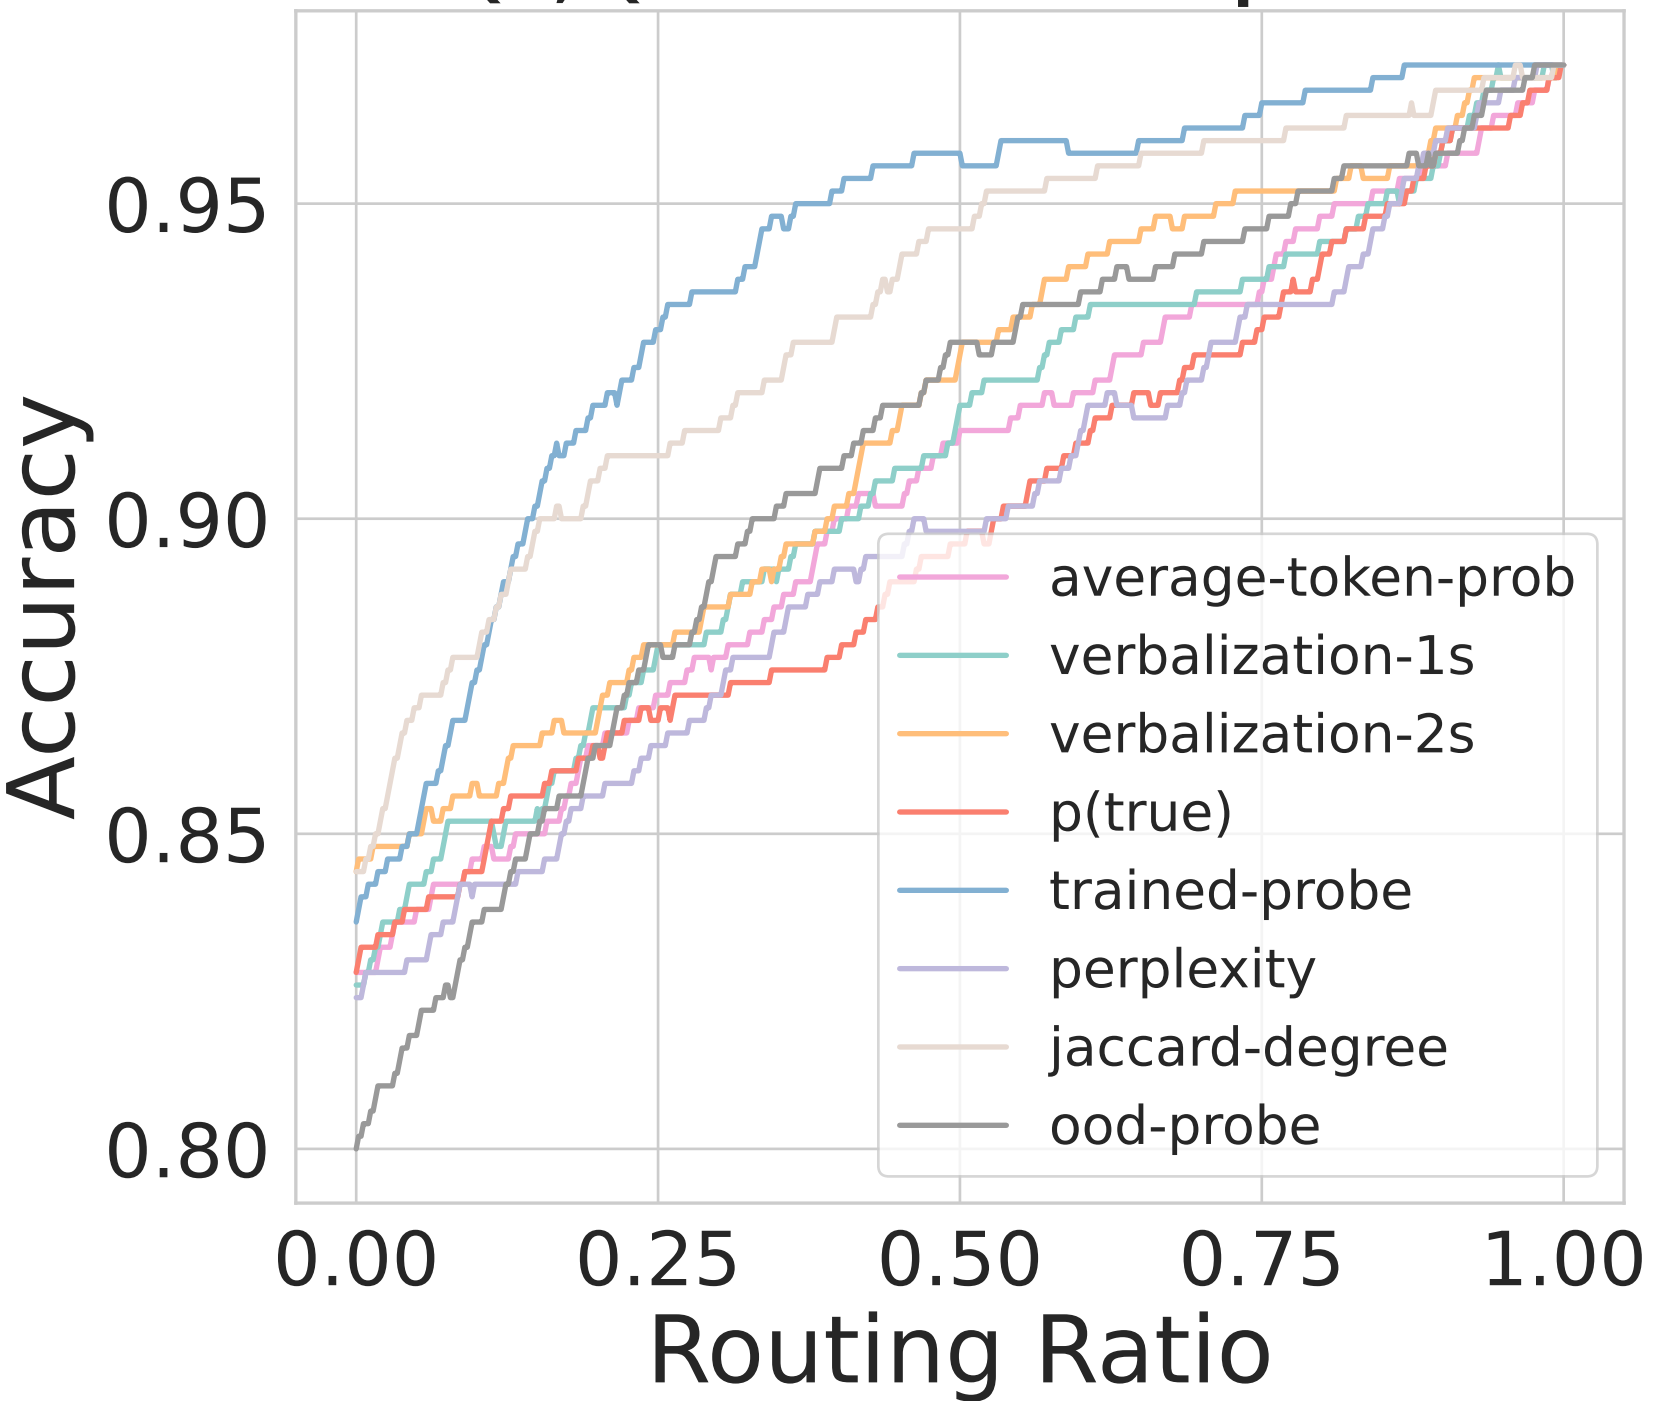

Supplement: supplementary_material [file rr_acc_co_qa_Qwen3-0.6B_dsR1.pdf › Routing_SLM_LLMs/Uncertainty-based Routing/w_legend/to_dsR1/rr_acc_co_qa_Qwen3-0.6B_dsR1.pdf]

**CoQA, Qwen3-1.7B to DeepSeek-R1**

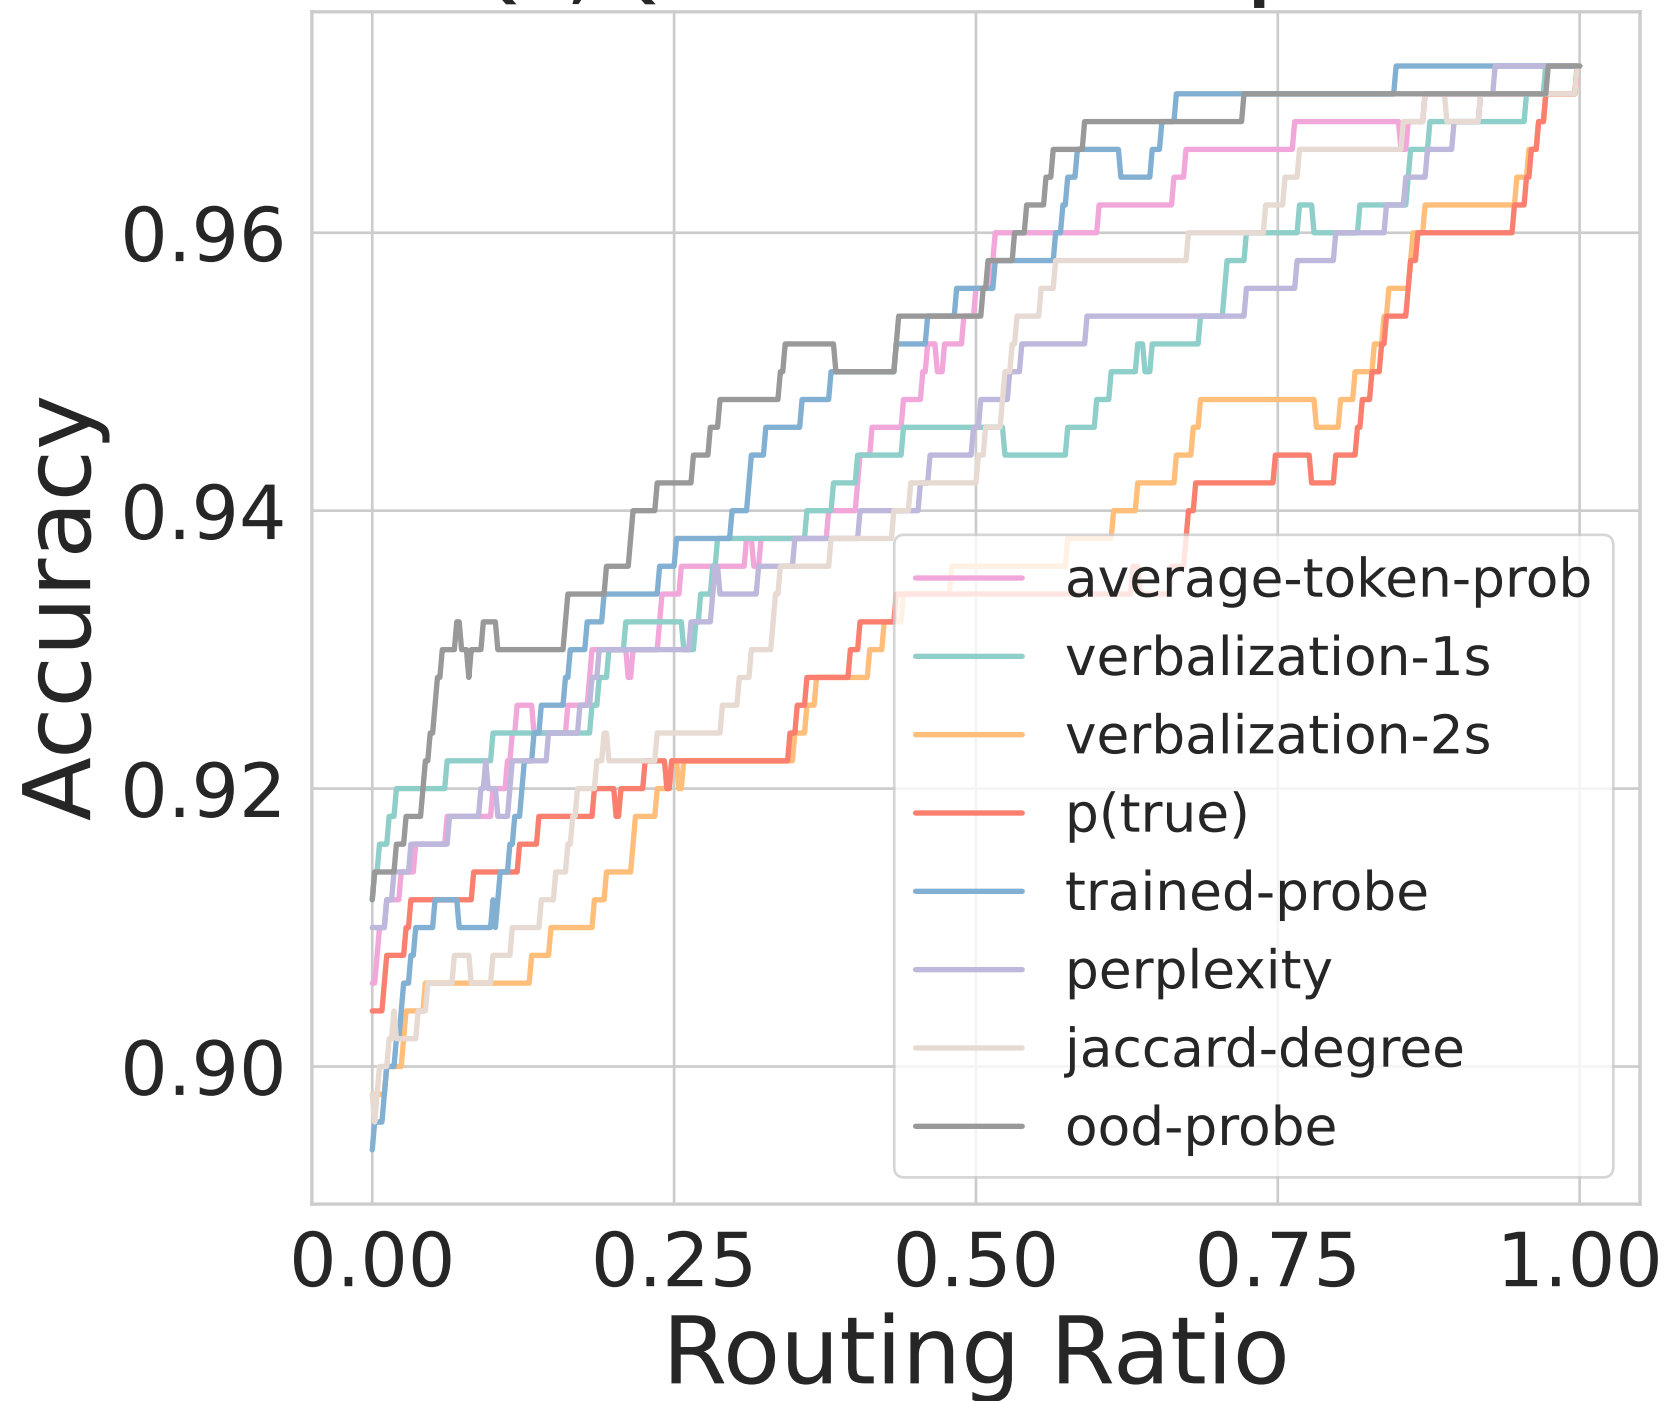

Supplement: supplementary_material [file rr_acc_co_qa_Qwen3-1.7B_dsR1.pdf › Routing_SLM_LLMs/Uncertainty-based Routing/w_legend/to_dsR1/rr_acc_co_qa_Qwen3-1.7B_dsR1.pdf]

**CoQA, Qwen3-4B to DeepSeek-R1**

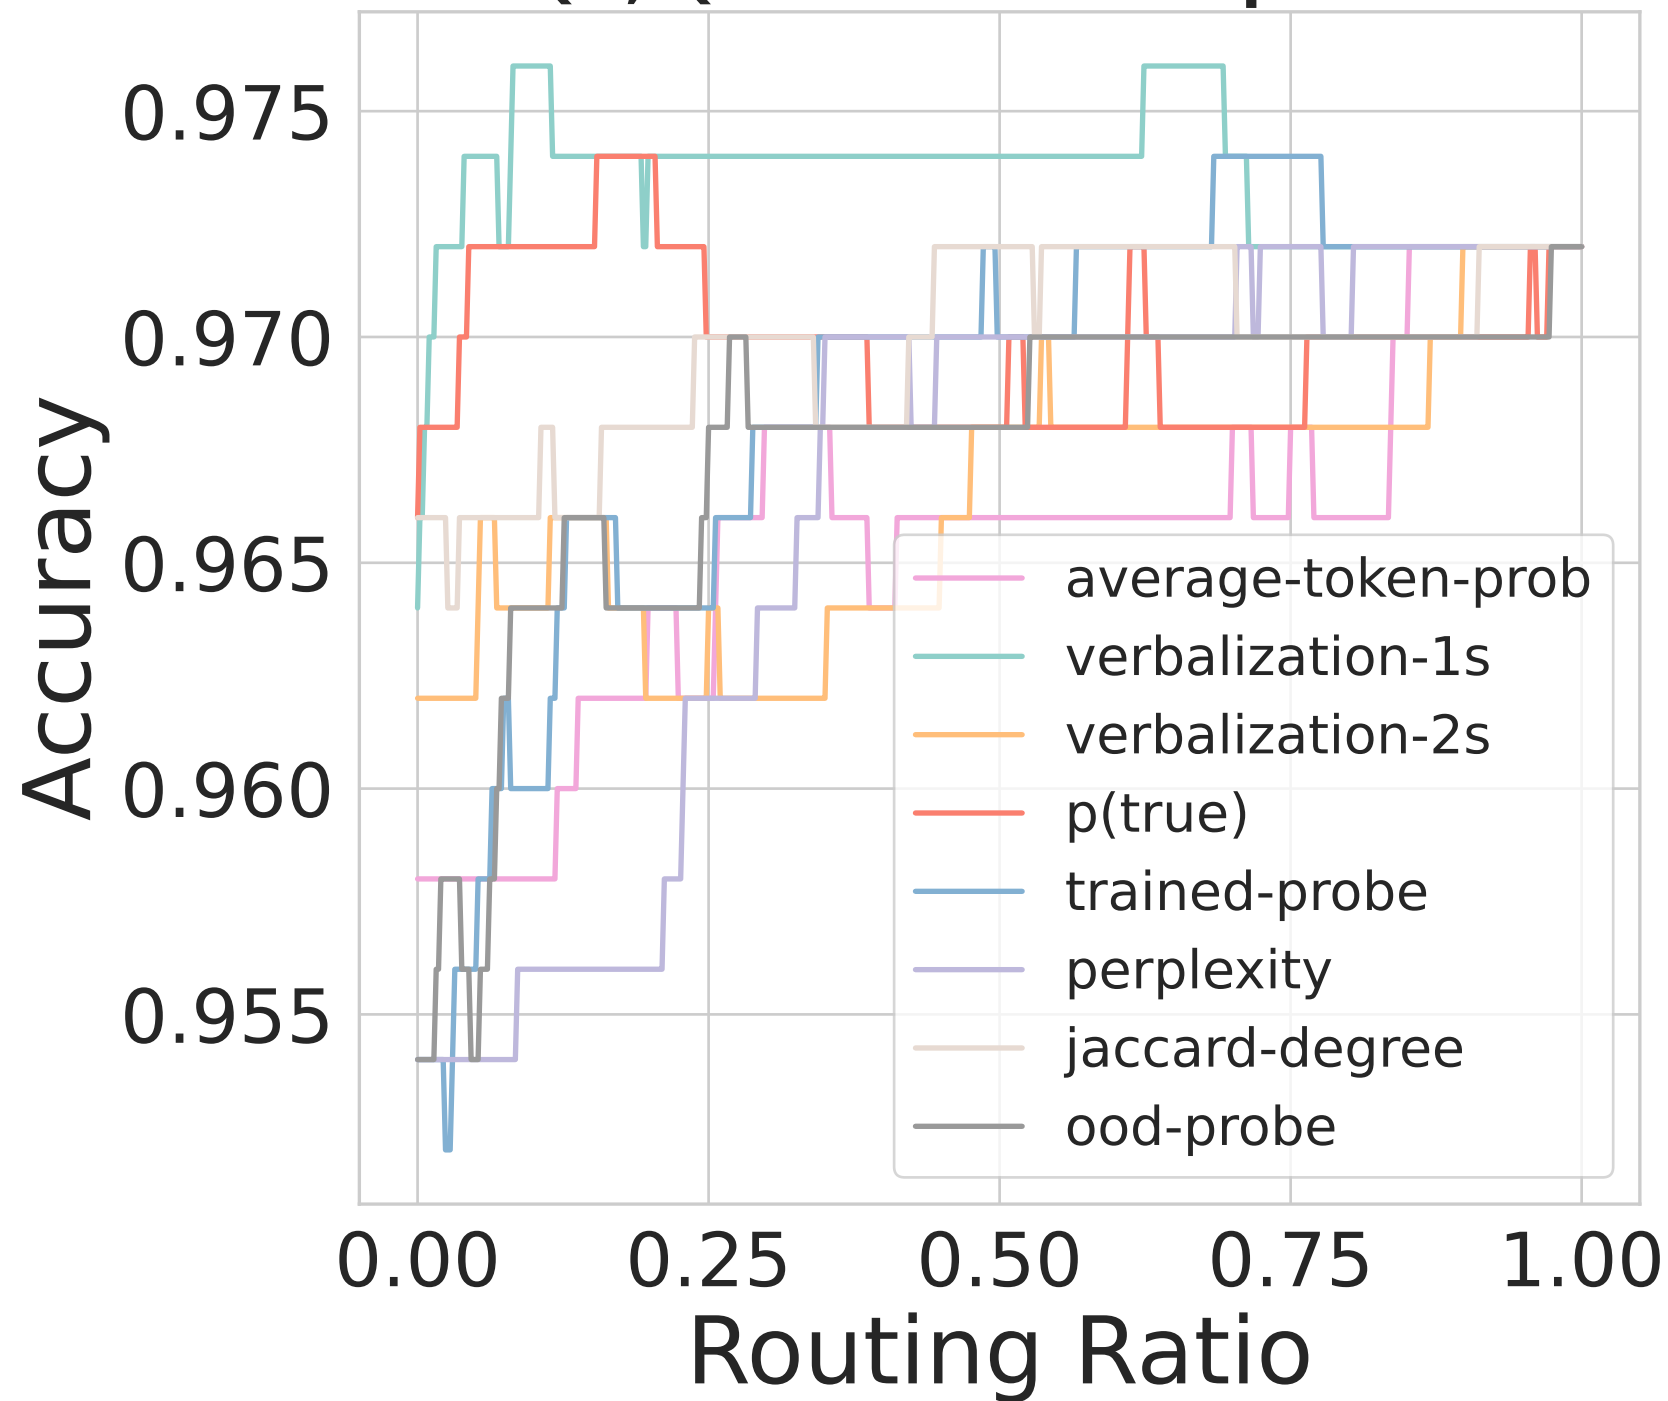

Supplement: supplementary_material [file rr_acc_co_qa_Qwen3-4B_dsR1.pdf › Routing_SLM_LLMs/Uncertainty-based Routing/w_legend/to_dsR1/rr_acc_co_qa_Qwen3-4B_dsR1.pdf]

# CoQA, llama-3.1-8b to DeepSeek-R1

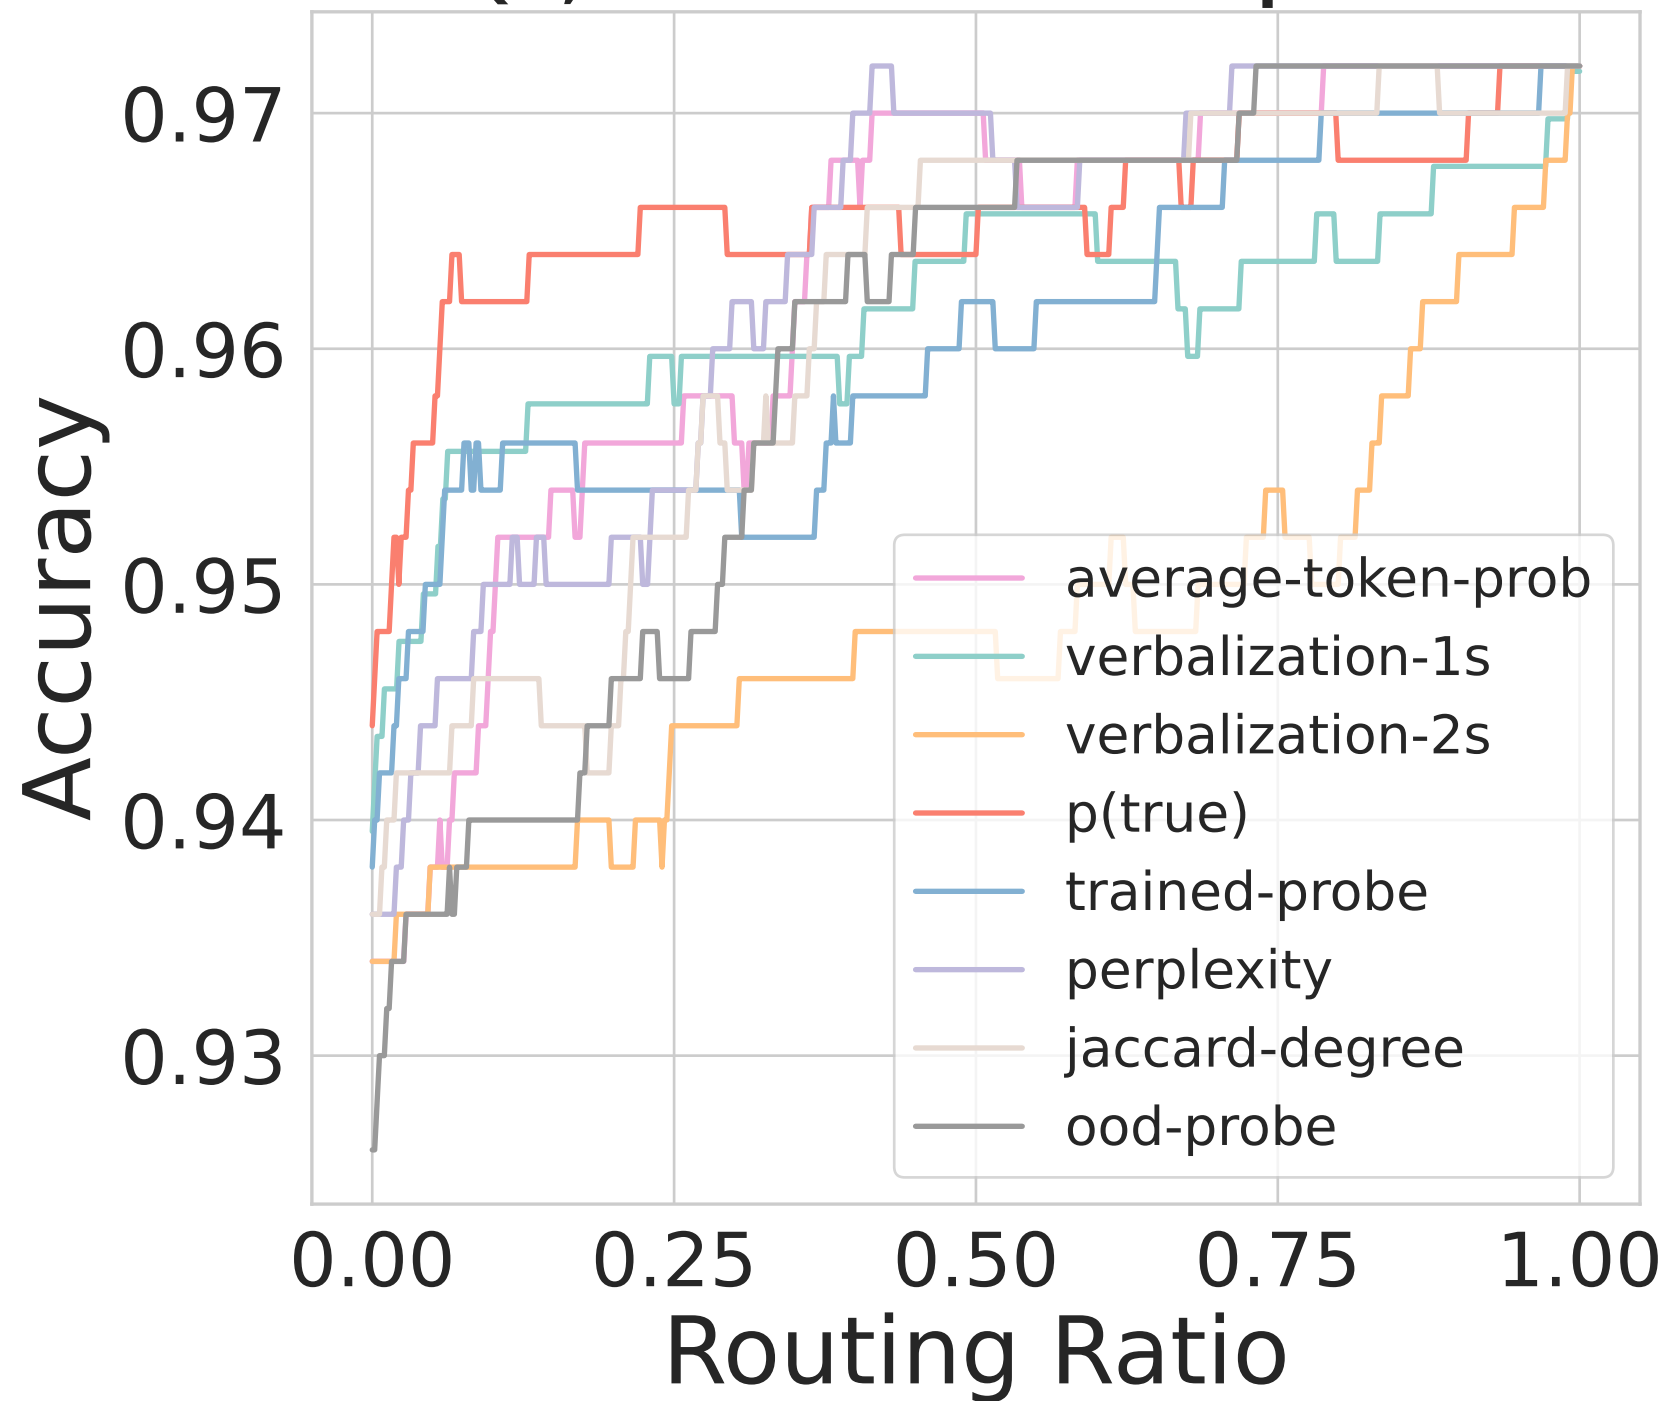

Supplement: supplementary_material [file rr_acc_co_qa_llama-3.1-8b_dsR1.pdf › Routing_SLM_LLMs/Uncertainty-based Routing/w_legend/to_dsR1/rr_acc_co_qa_llama-3.1-8b_dsR1.pdf]

**CoQA, llama-3.2-3b to DeepSeek-R1**

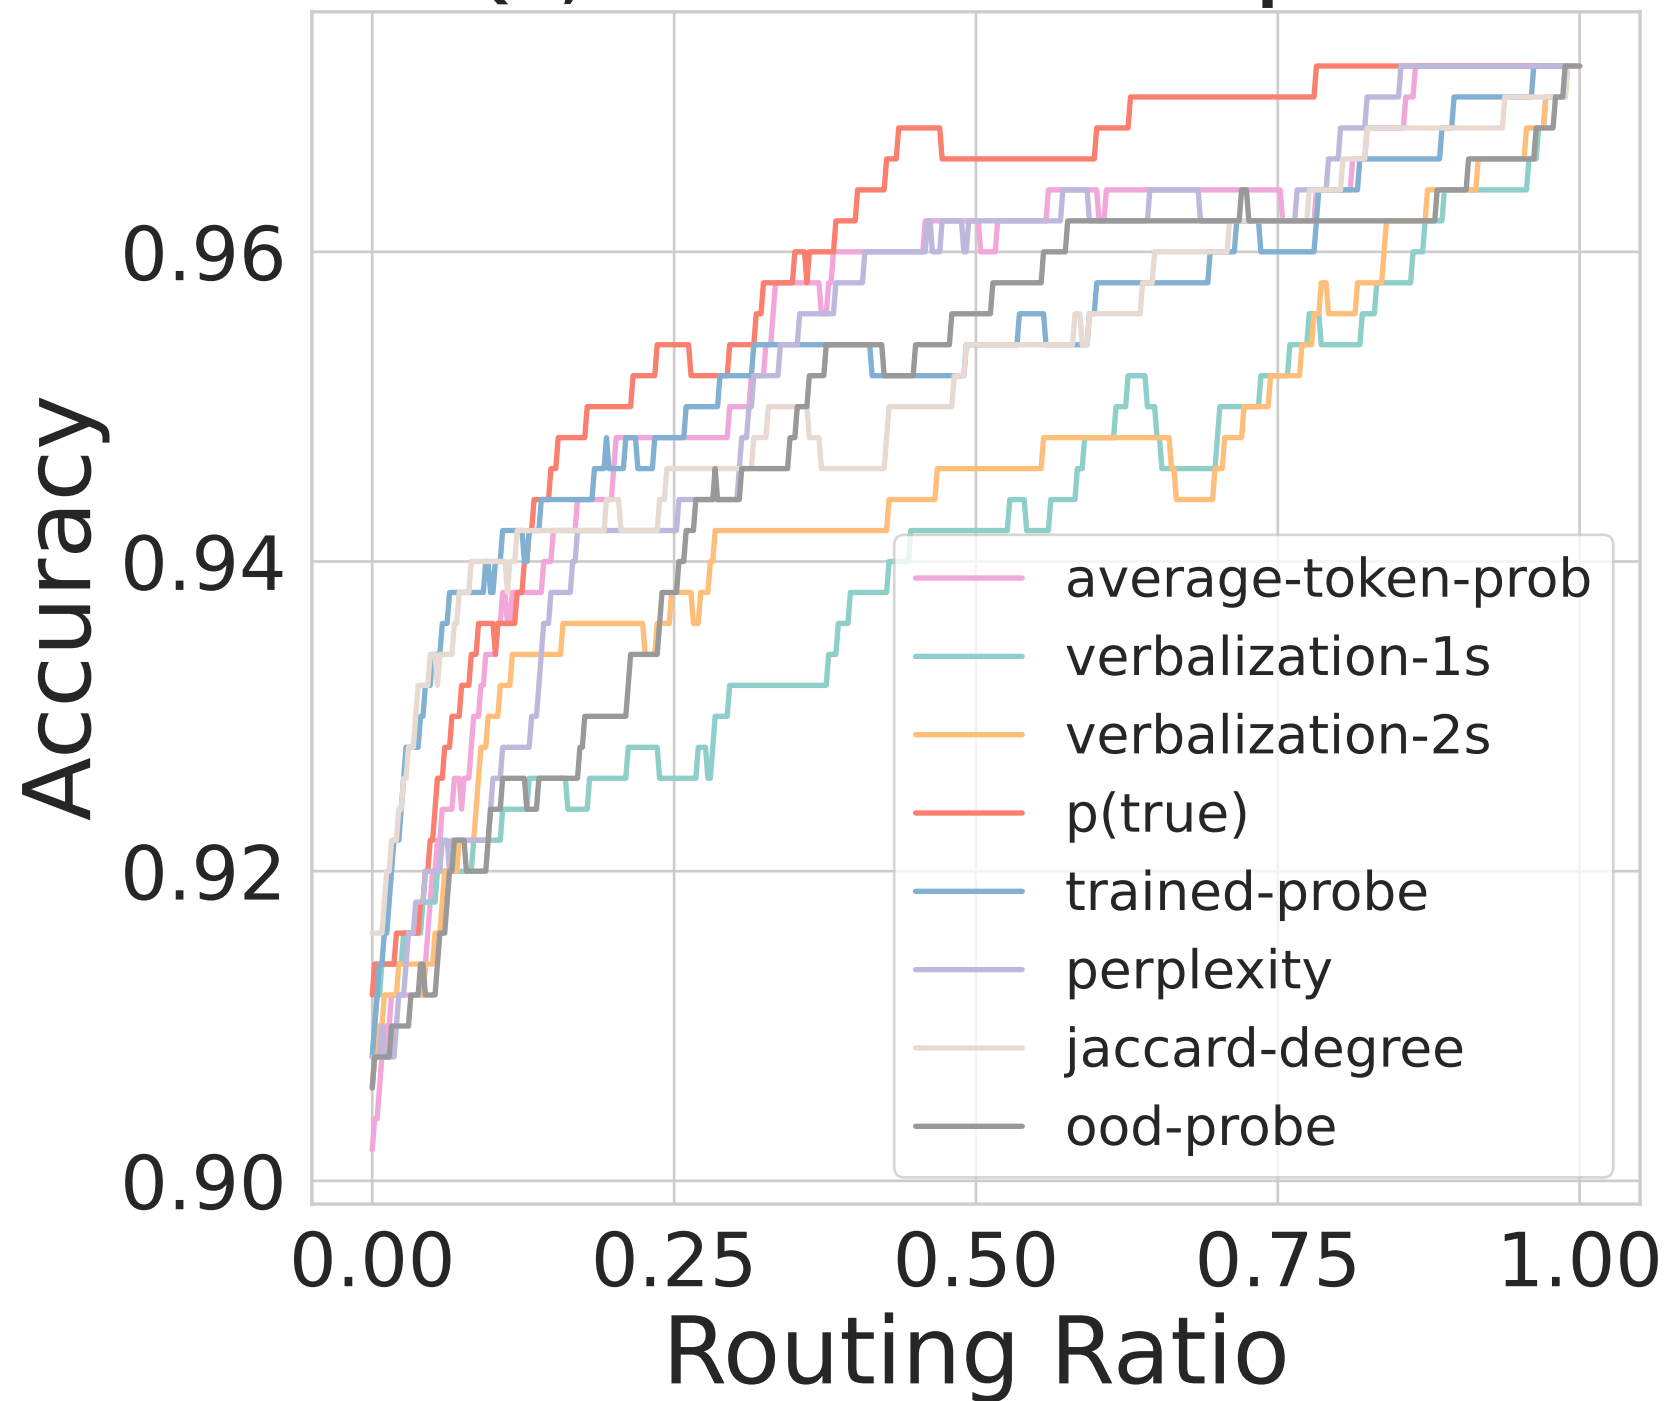

Supplement: supplementary_material [file rr_acc_co_qa_llama-3.2-3b_dsR1.pdf › Routing_SLM_LLMs/Uncertainty-based Routing/w_legend/to_dsR1/rr_acc_co_qa_llama-3.2-3b_dsR1.pdf]

**CoQA, mistral-7b to DeepSeek-R1**

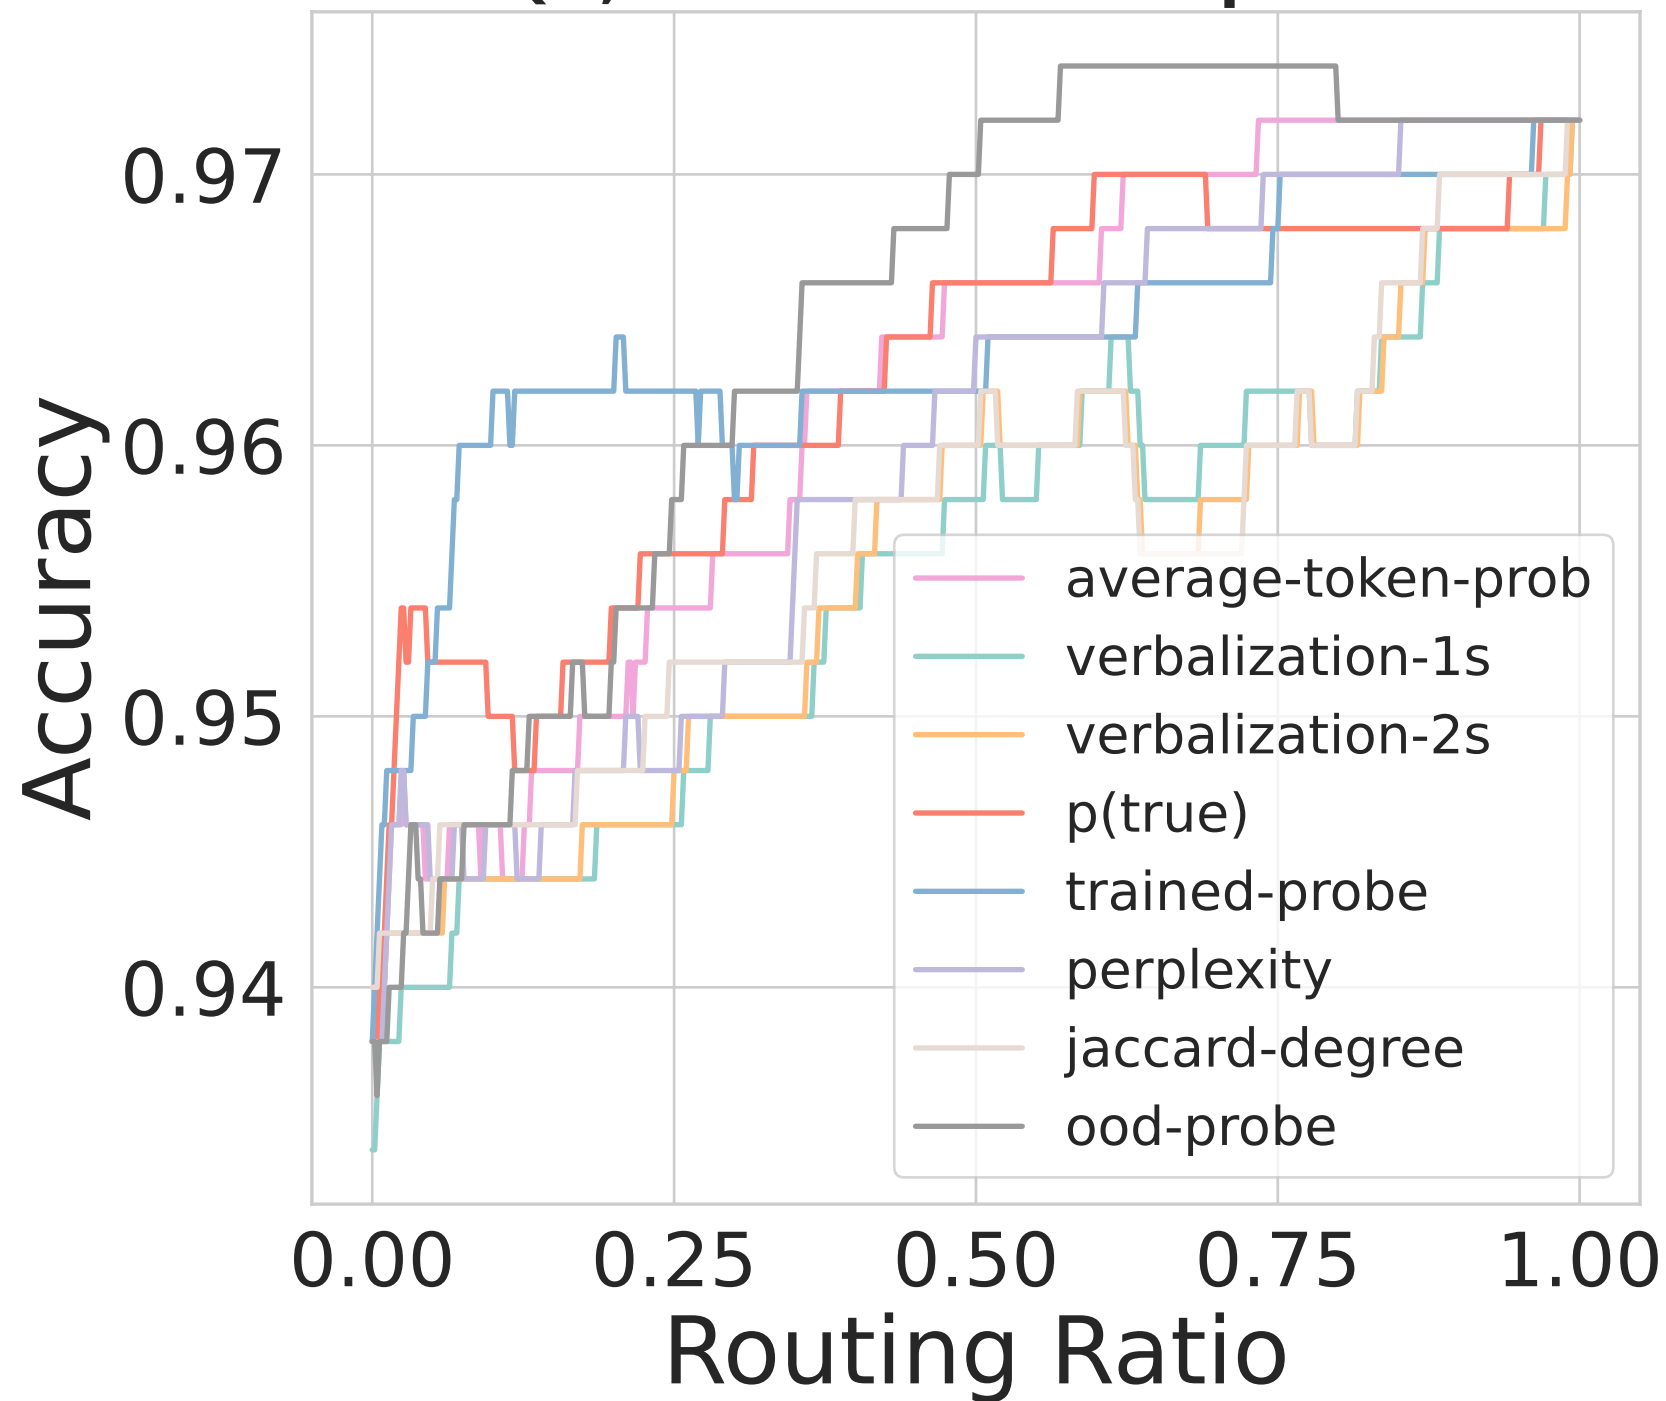

Supplement: supplementary_material [file rr_acc_co_qa_mistral-7b_dsR1.pdf › Routing_SLM_LLMs/Uncertainty-based Routing/w_legend/to_dsR1/rr_acc_co_qa_mistral-7b_dsR1.pdf]

# CoQA, phi-4-mini-reasoning to DeepSeek-R1

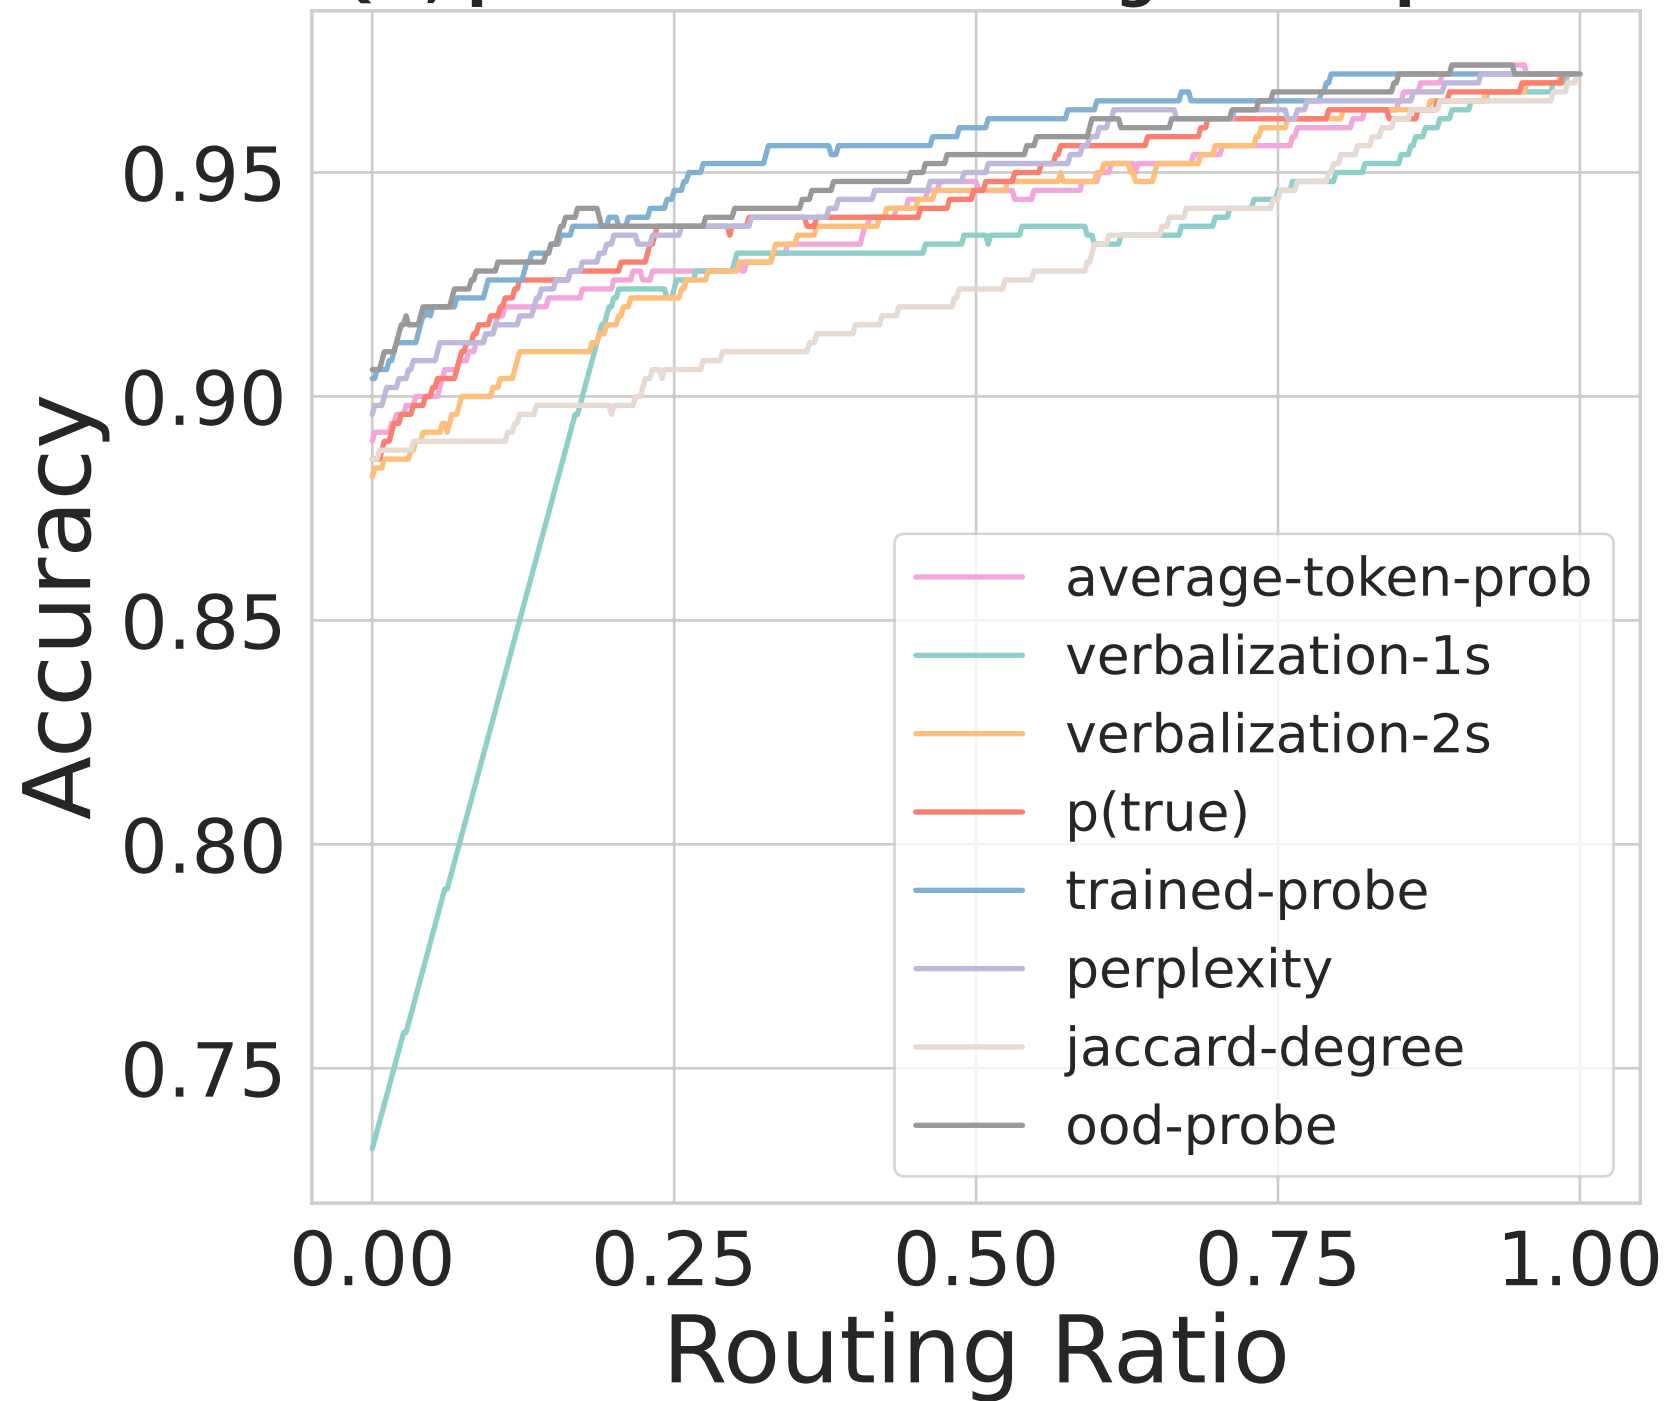

Supplement: supplementary_material [file rr_acc_co_qa_phi-4-mini-reasoning_dsR1.pdf › Routing_SLM_LLMs/Uncertainty-based Routing/w_legend/to_dsR1/rr_acc_co_qa_phi-4-mini-reasoning_dsR1.pdf]

CoQA, qwen-2.5-7b to DeepSeek-R1

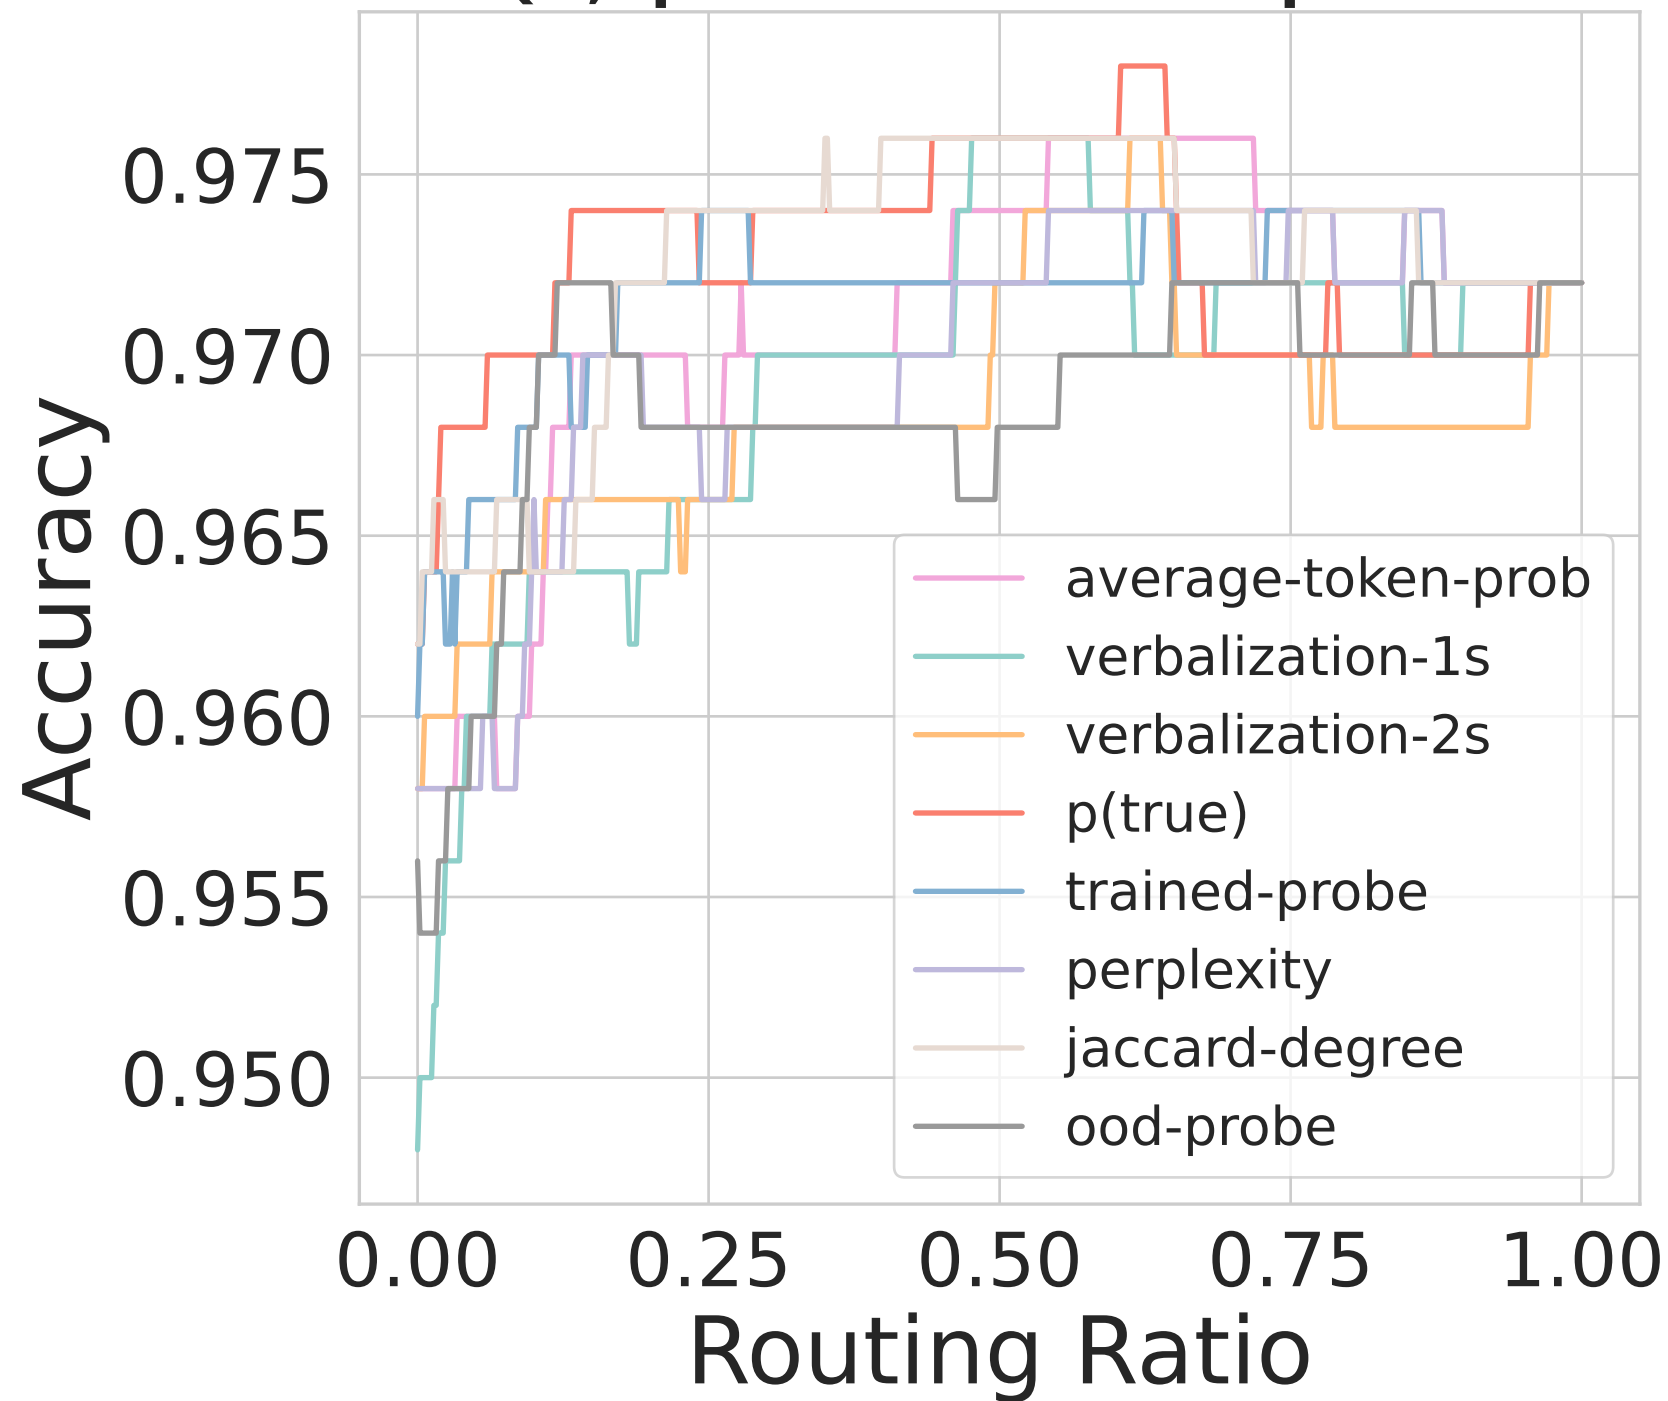

Supplement: supplementary_material [file rr_acc_co_qa_qwen-2.5-7b_dsR1.pdf › Routing_SLM_LLMs/Uncertainty-based Routing/w_legend/to_dsR1/rr_acc_co_qa_qwen-2.5-7b_dsR1.pdf]

# CommonsenseQA, Qwen3-0.6B to DeepSeek-R1

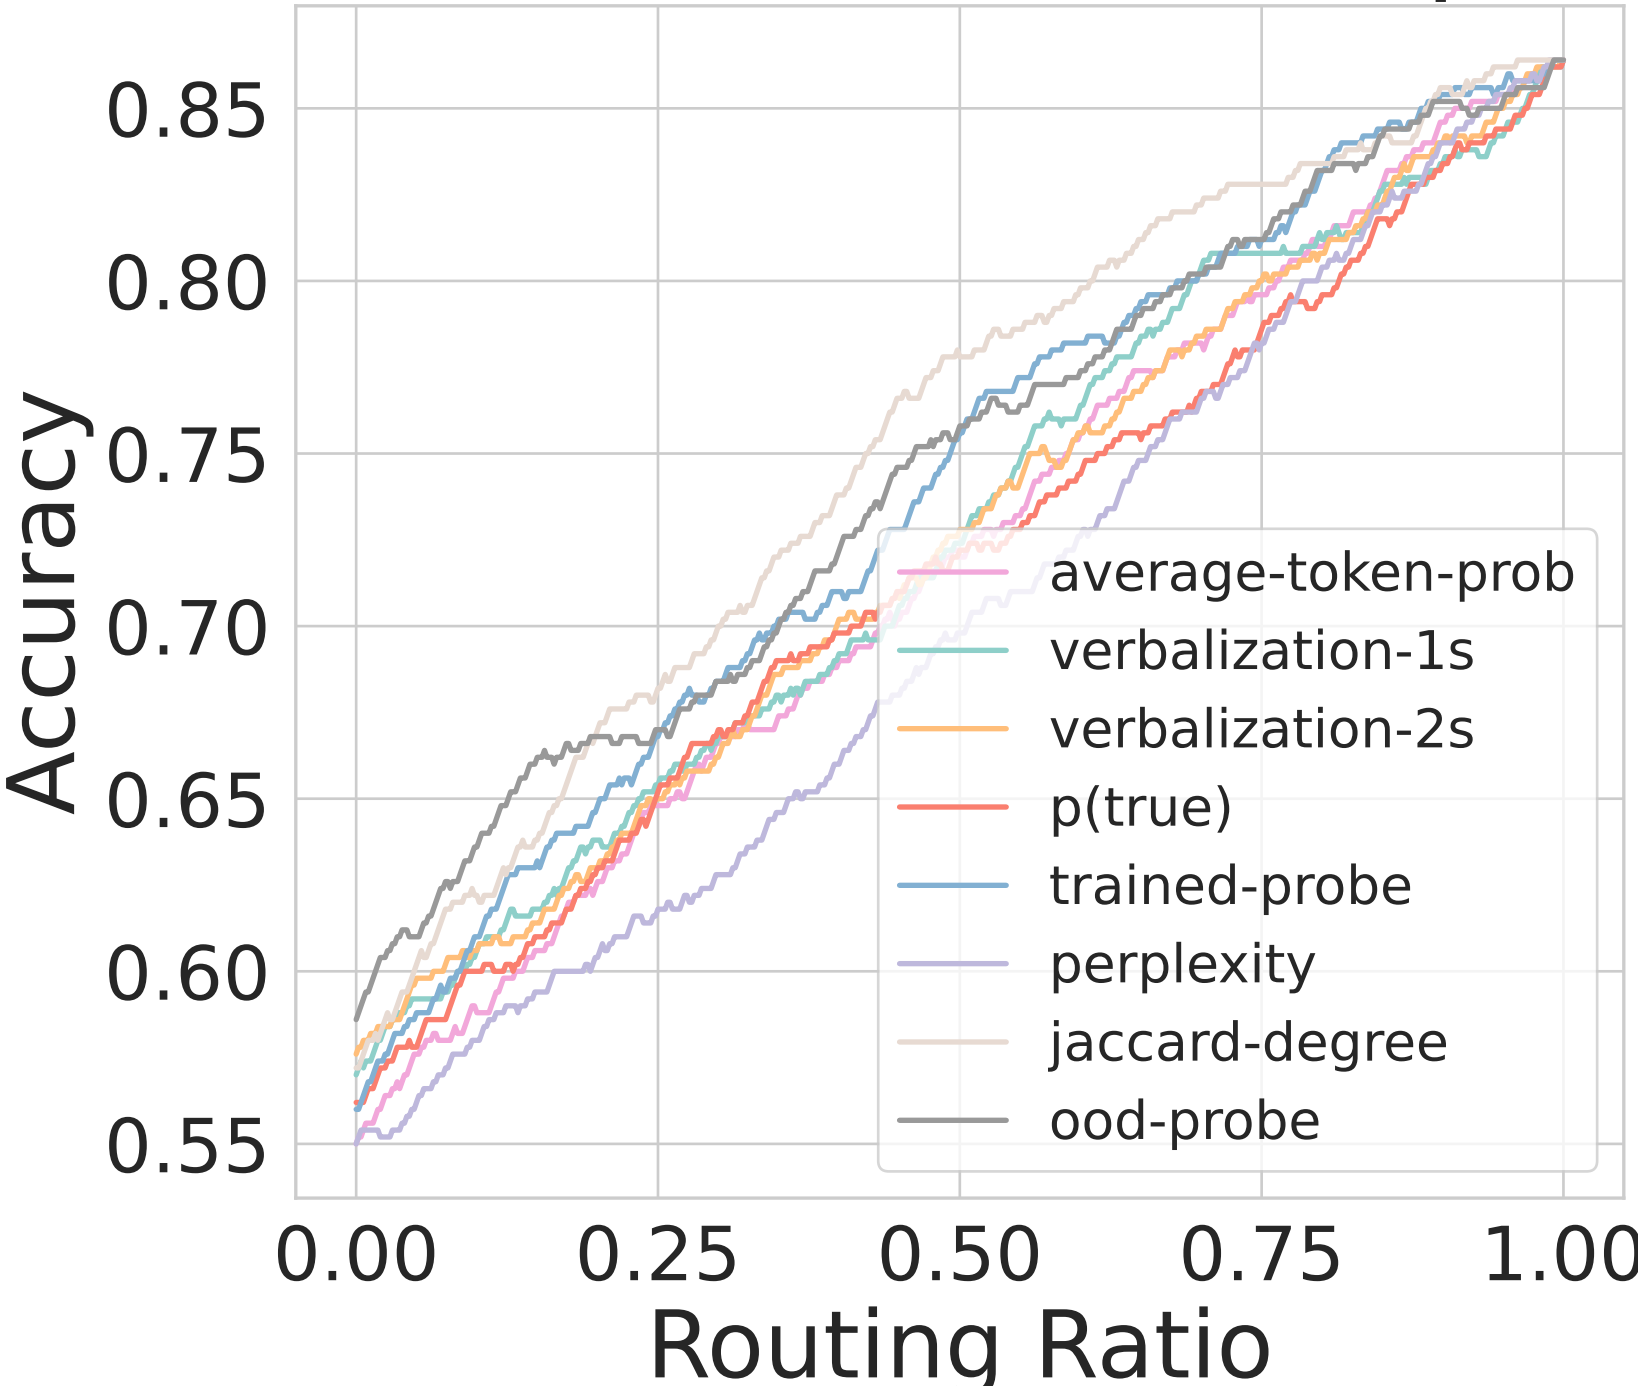

Supplement: supplementary_material [file rr_acc_commonsense_qa_Qwen3-0.6B_dsR1.pdf › Routing_SLM_LLMs/Uncertainty-based Routing/w_legend/to_dsR1/rr_acc_commonsense_qa_Qwen3-0.6B_dsR1.pdf]

# CommonsenseQA, Qwen3-1.7B to DeepSeek-R1

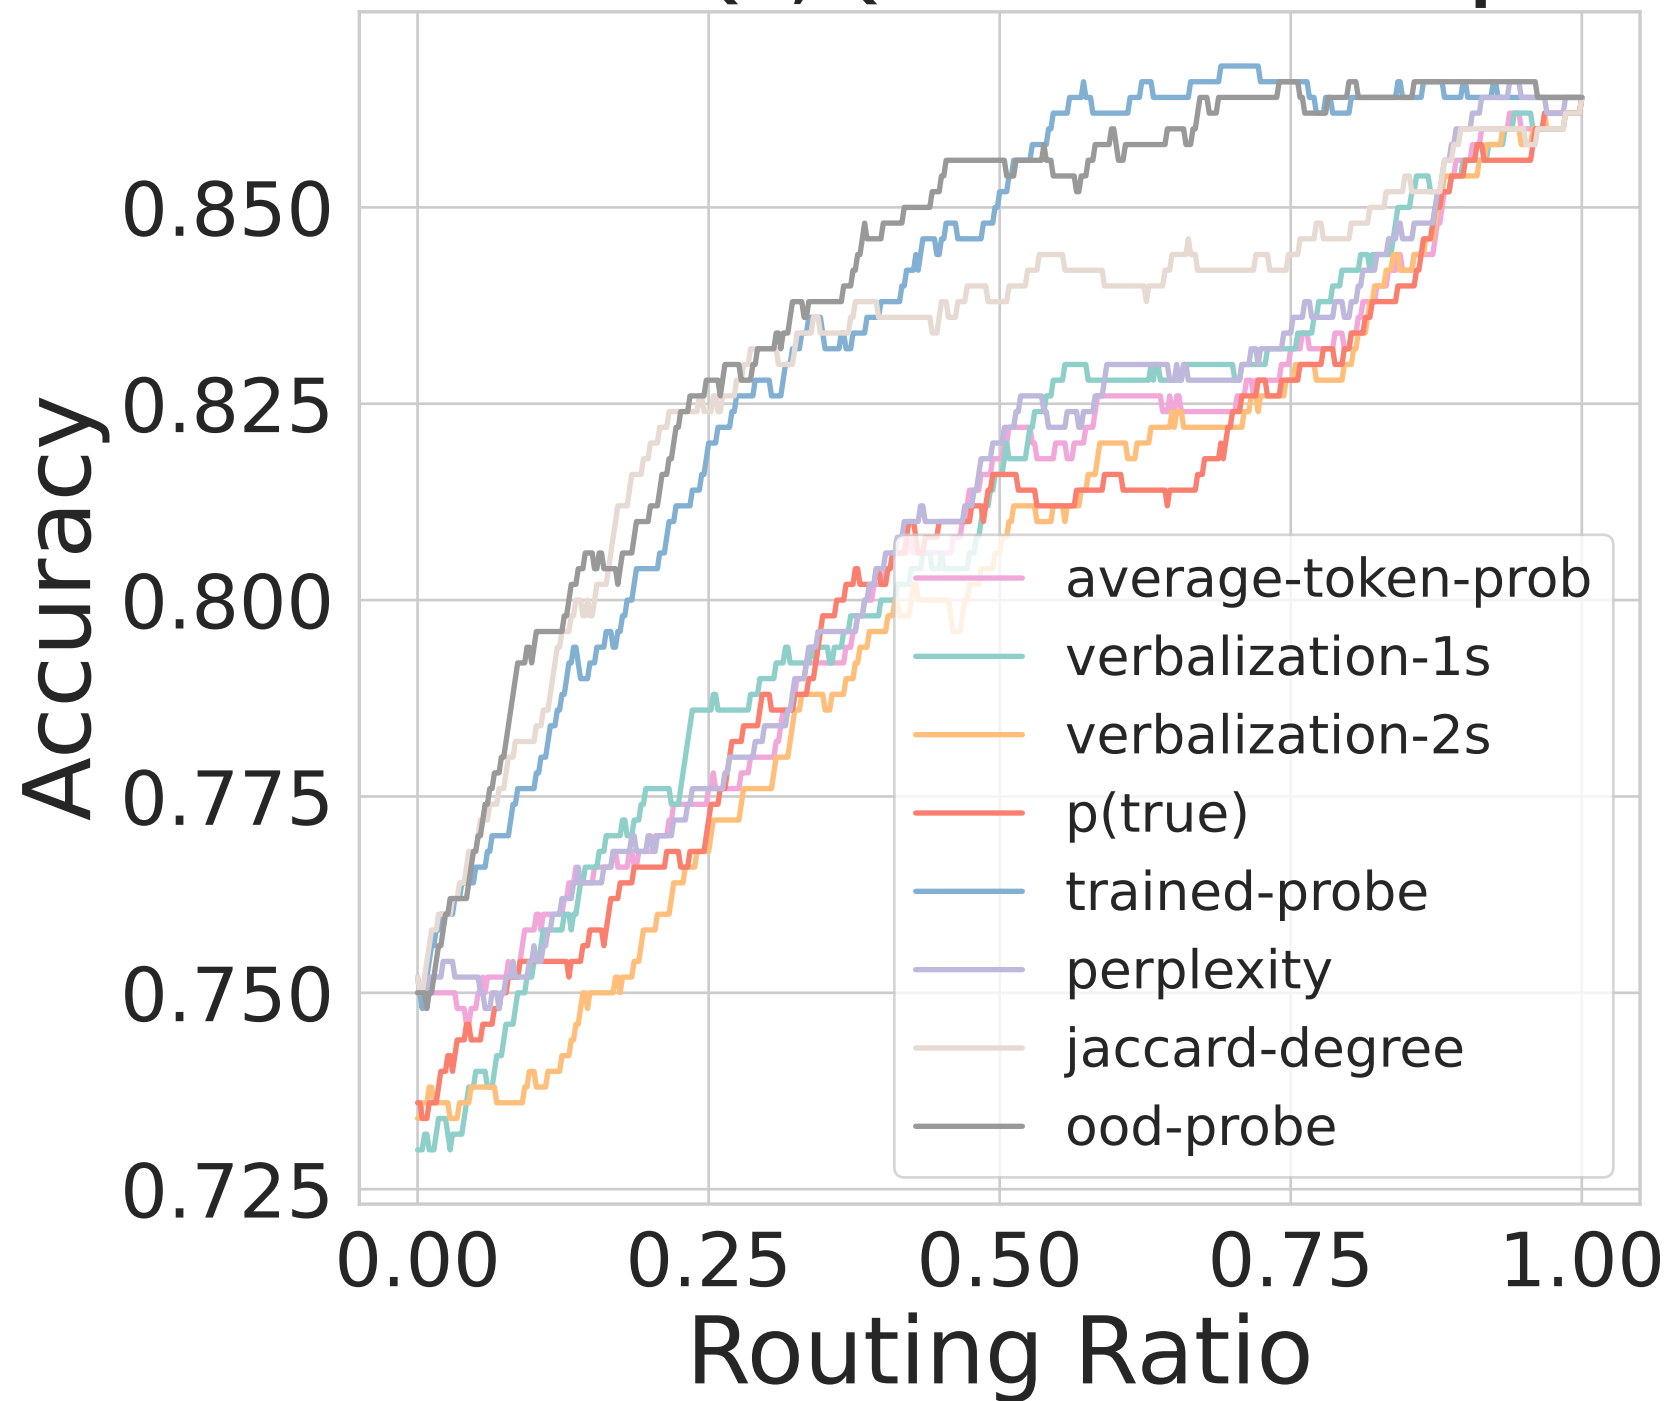

Supplement: supplementary_material [file rr_acc_commonsense_qa_Qwen3-1.7B_dsR1.pdf › Routing_SLM_LLMs/Uncertainty-based Routing/w_legend/to_dsR1/rr_acc_commonsense_qa_Qwen3-1.7B_dsR1.pdf]

# CommonsenseQA, Qwen3-4B to DeepSeek-R1

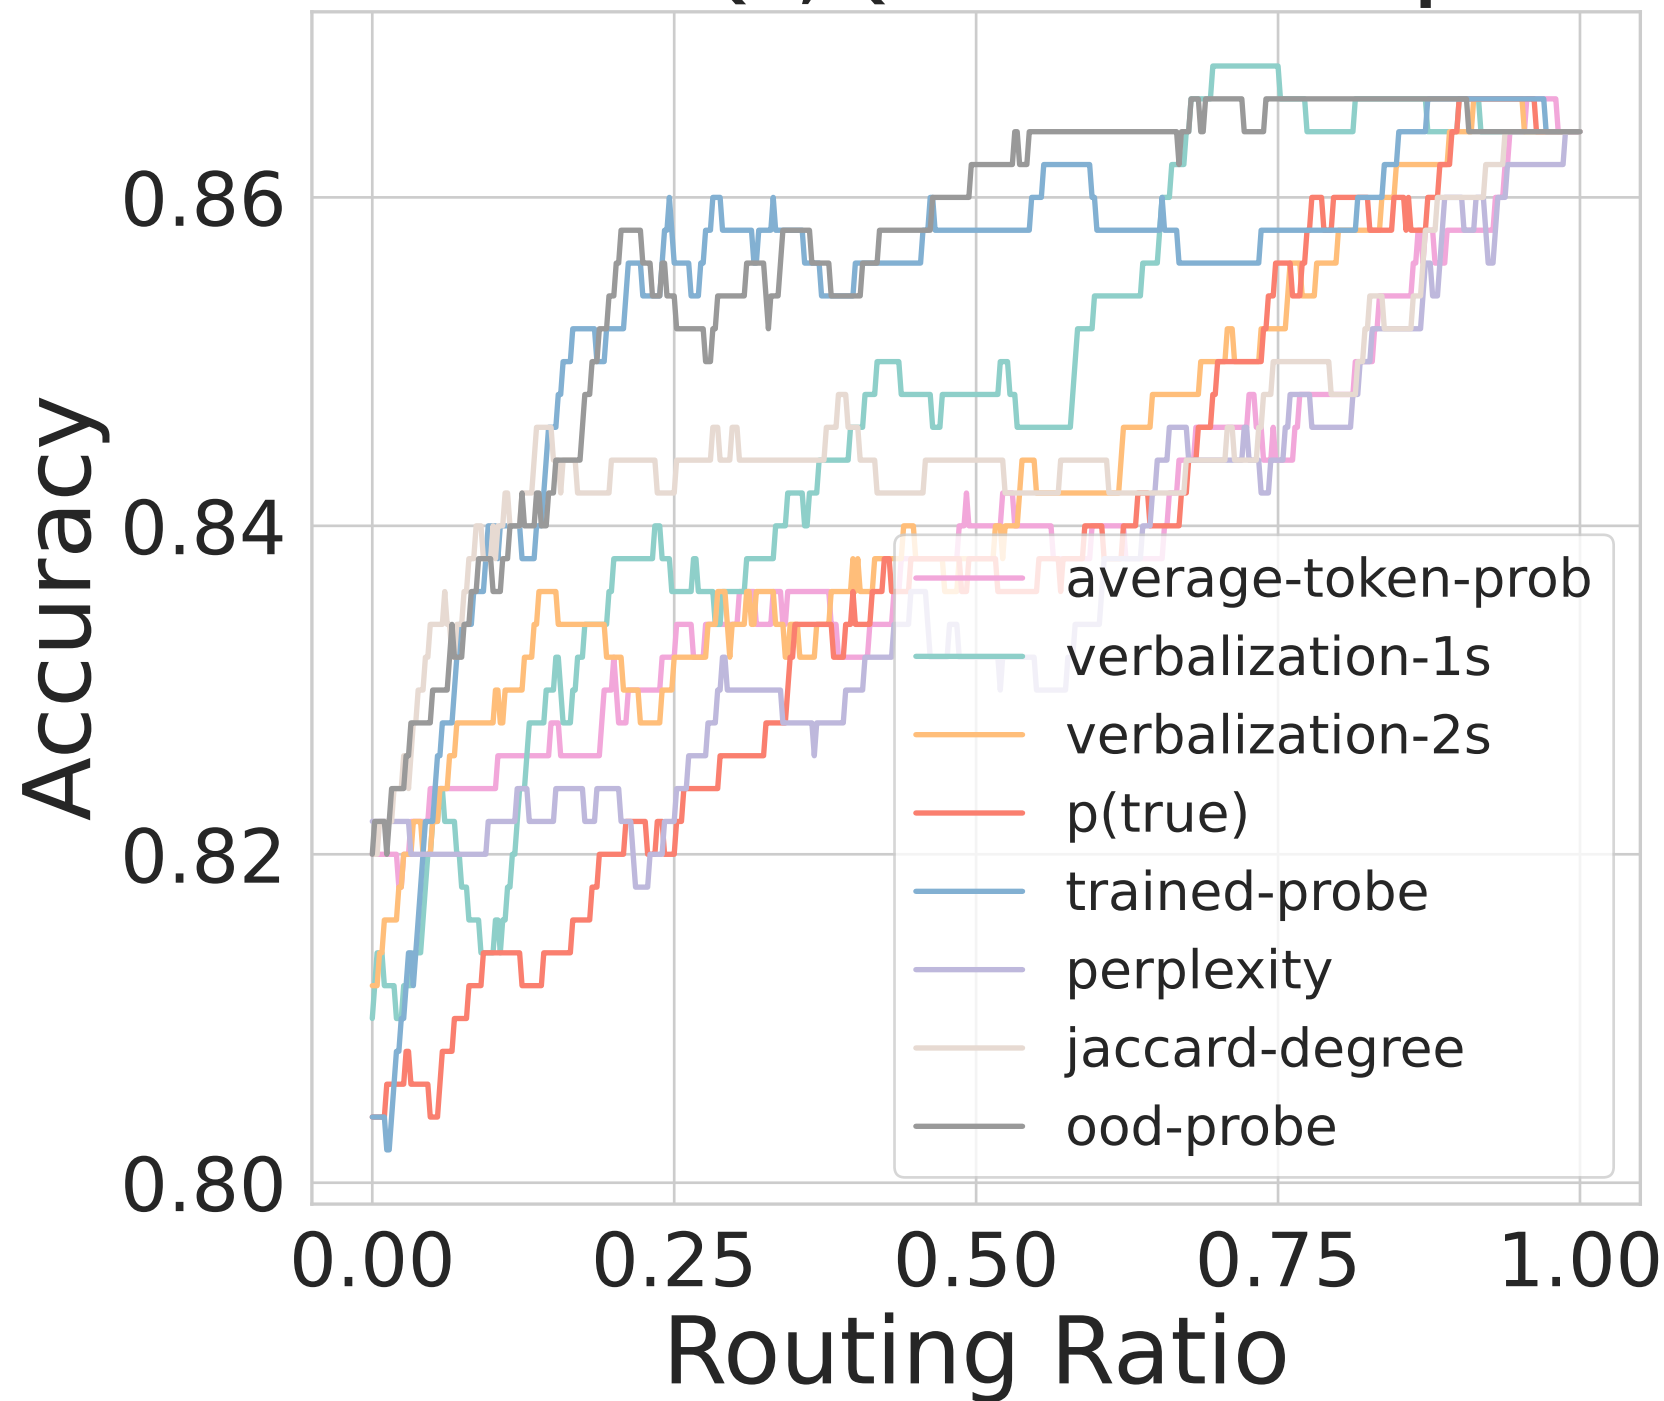

Supplement: supplementary_material [file rr_acc_commonsense_qa_Qwen3-4B_dsR1.pdf › Routing_SLM_LLMs/Uncertainty-based Routing/w_legend/to_dsR1/rr_acc_commonsense_qa_Qwen3-4B_dsR1.pdf]

# CommonsenseQA, llama-3.1-8b to DeepSeek-R1

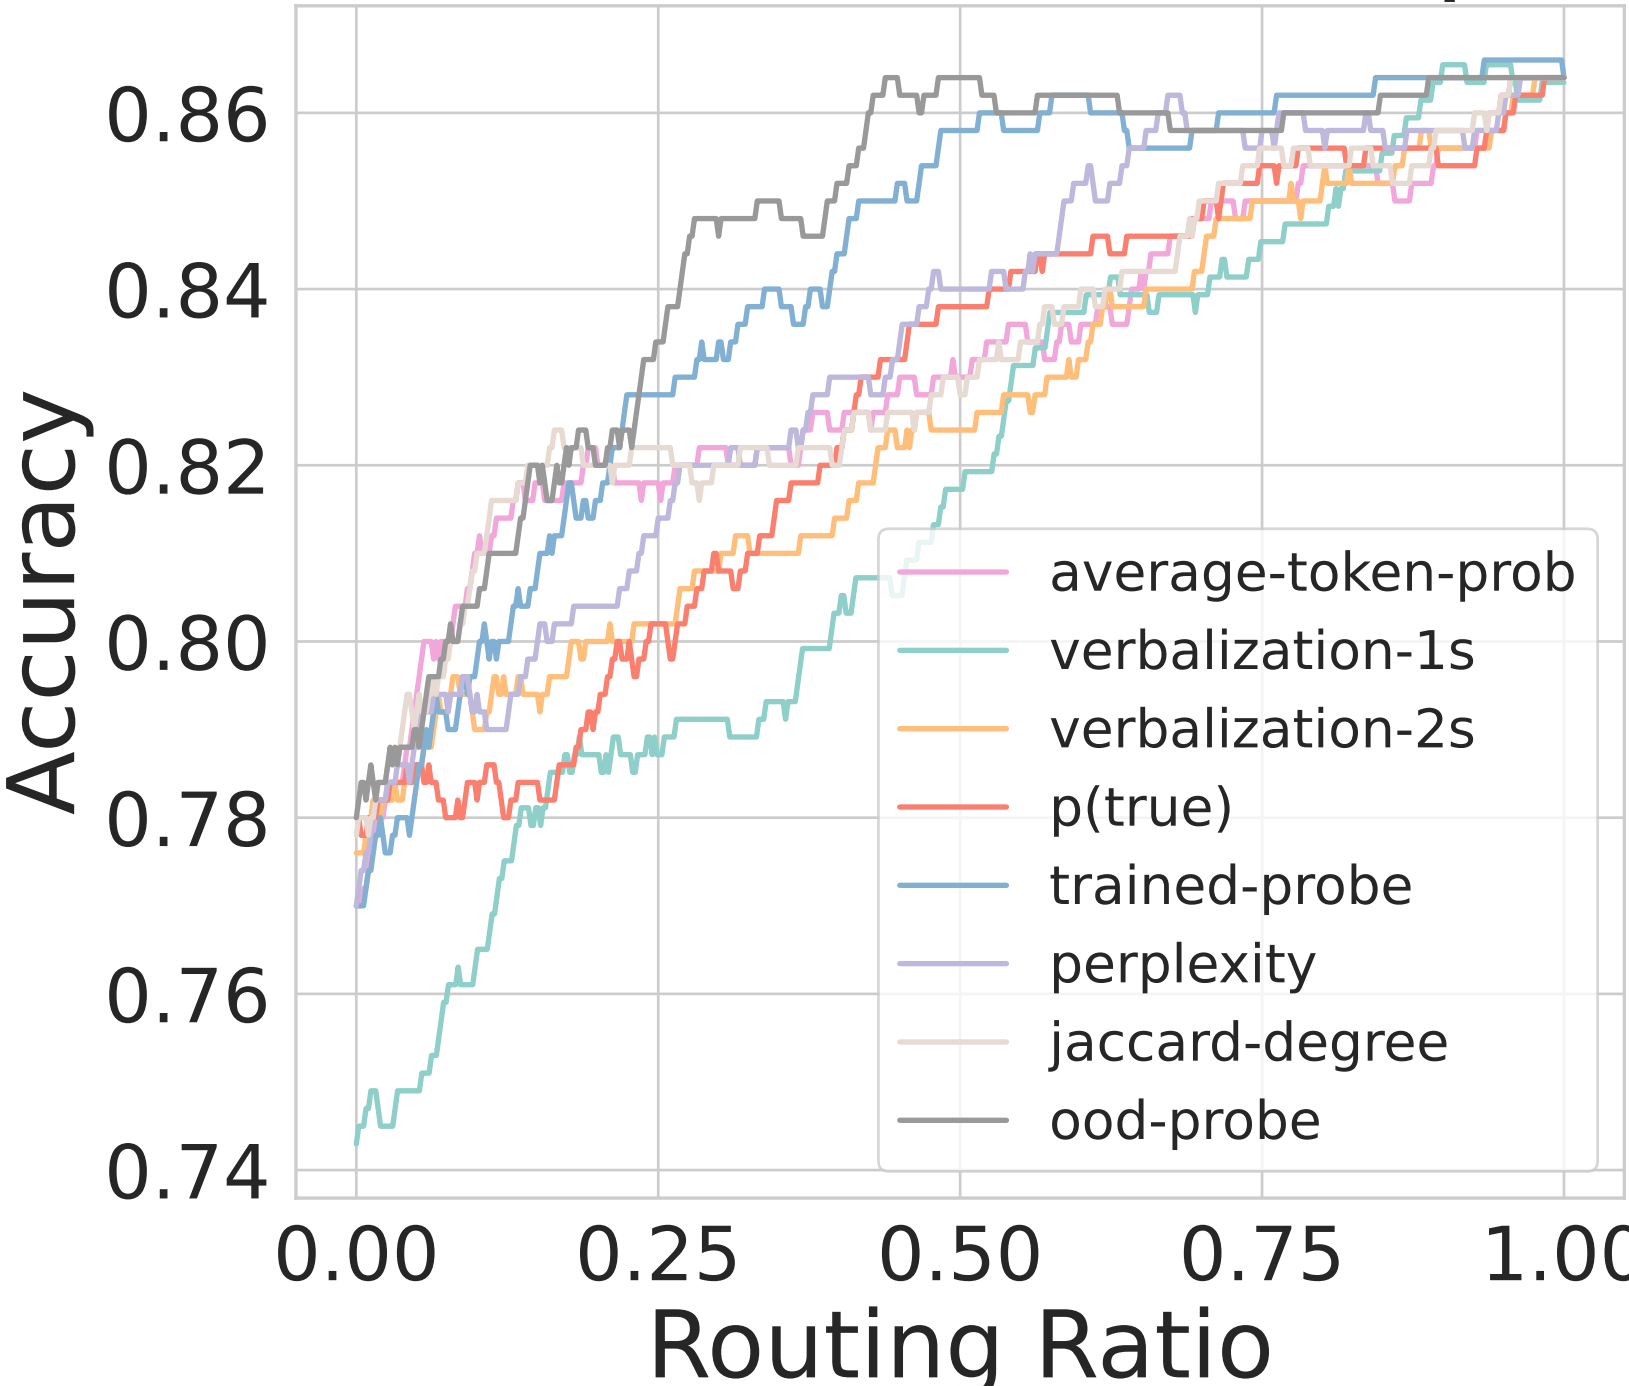

Supplement: supplementary_material [file rr_acc_commonsense_qa_llama-3.1-8b_dsR1.pdf › Routing_SLM_LLMs/Uncertainty-based Routing/w_legend/to_dsR1/rr_acc_commonsense_qa_llama-3.1-8b_dsR1.pdf]

# CommonsenseQA, mistral-7b to DeepSeek-R1

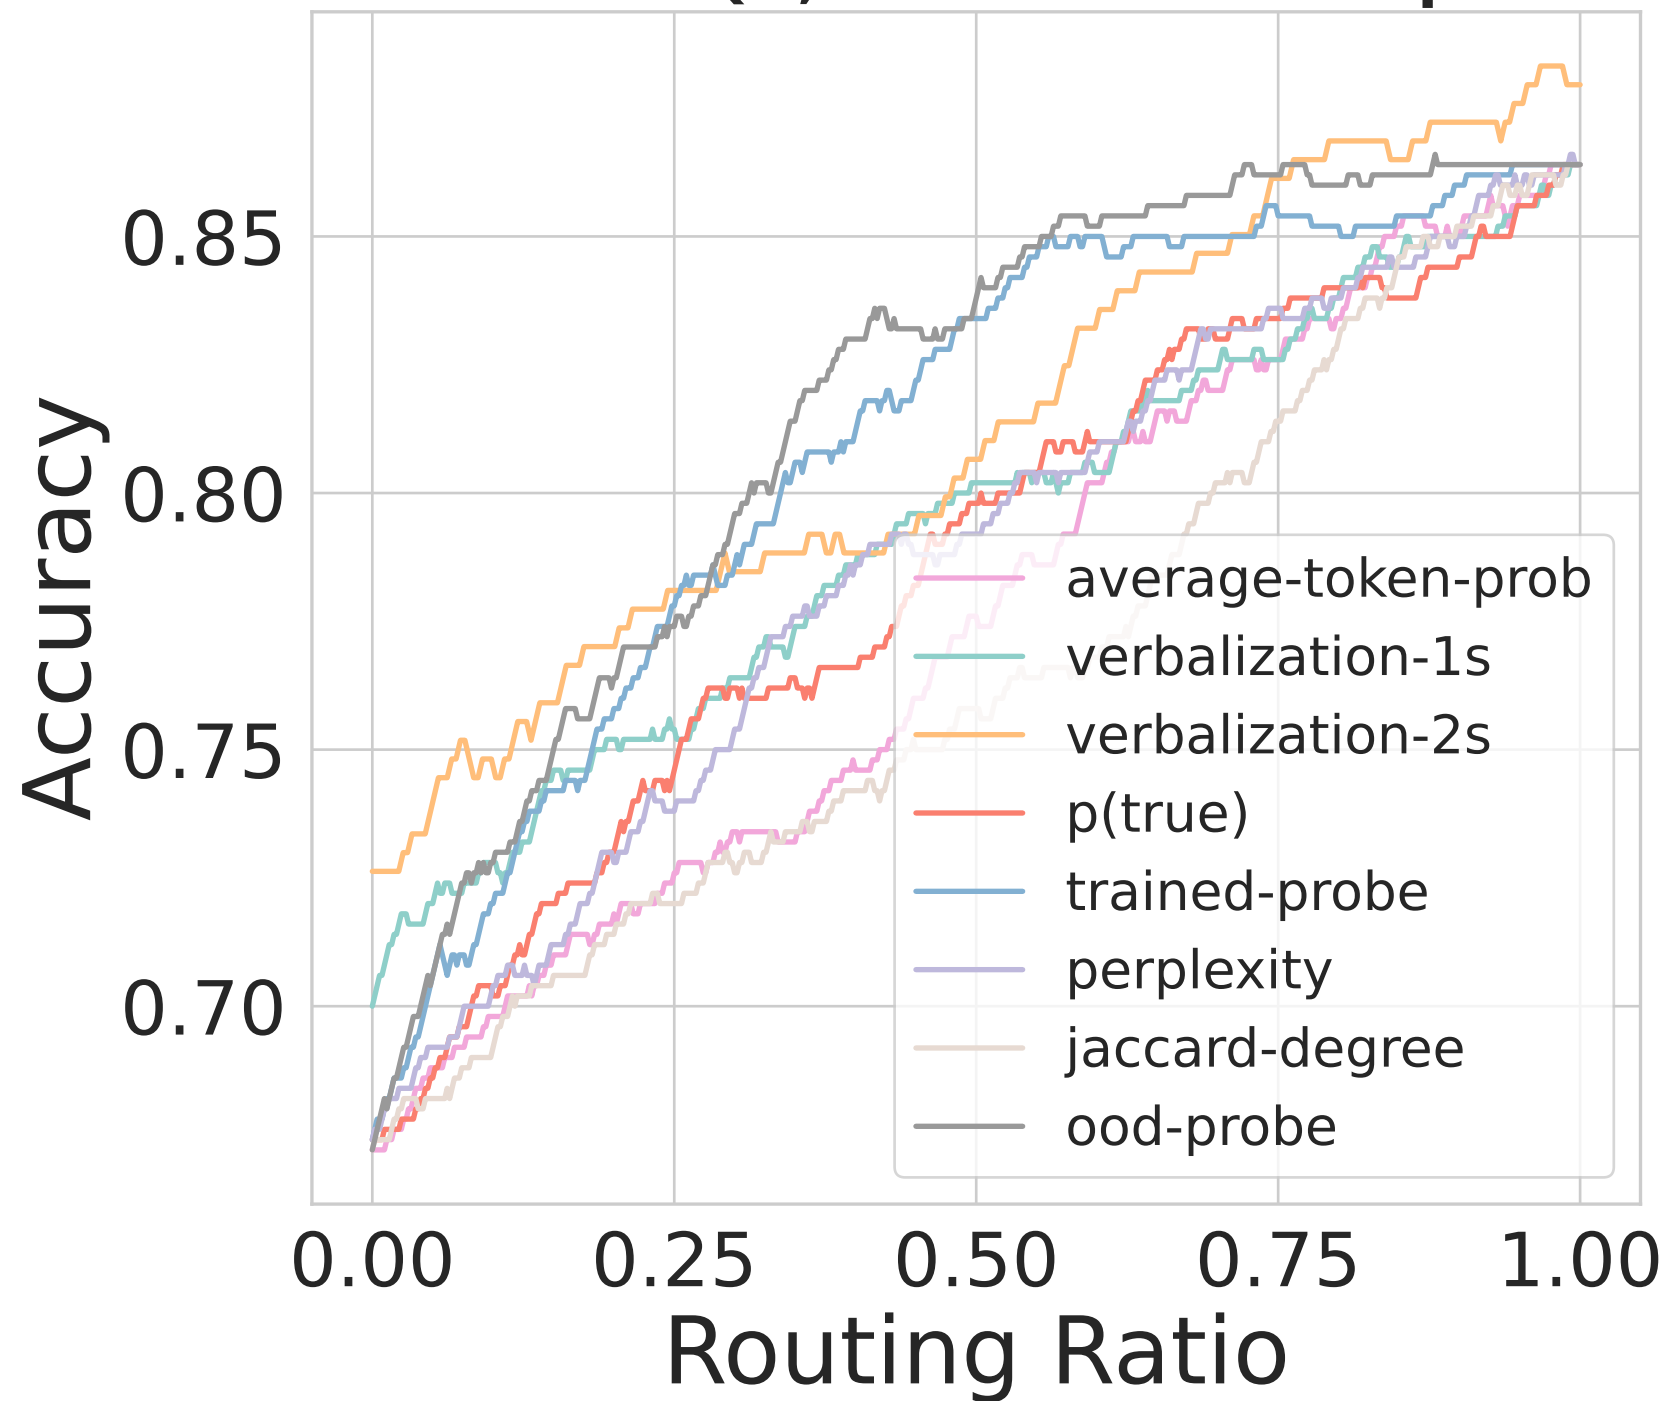

Supplement: supplementary_material [file rr_acc_commonsense_qa_mistral-7b_dsR1.pdf › Routing_SLM_LLMs/Uncertainty-based Routing/w_legend/to_dsR1/rr_acc_commonsense_qa_mistral-7b_dsR1.pdf]

# CommonsenseQA, phi-3.5-mini to DeepSeek-R1

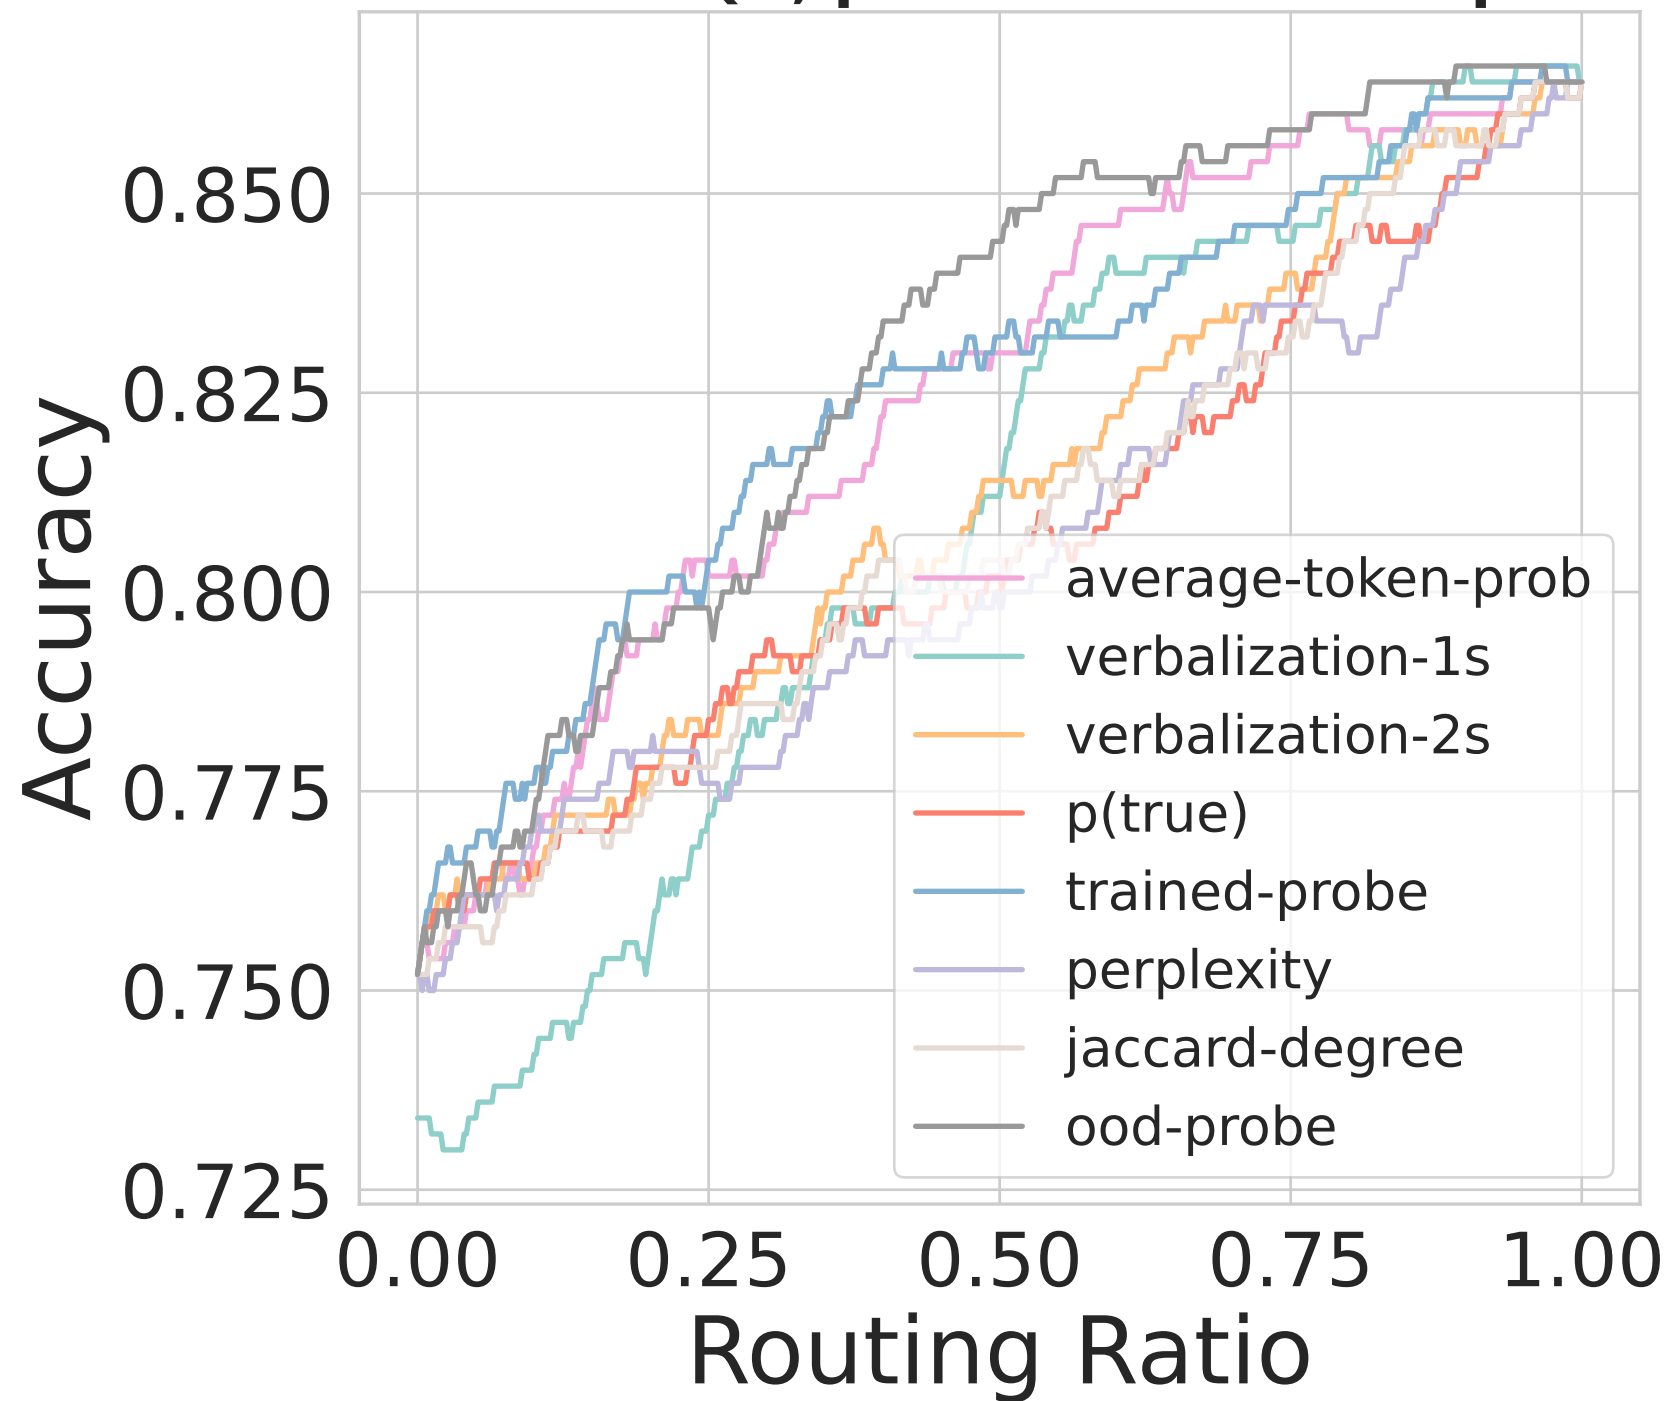

Supplement: supplementary_material [file rr_acc_commonsense_qa_phi-3.5-mini_dsR1.pdf › Routing_SLM_LLMs/Uncertainty-based Routing/w_legend/to_dsR1/rr_acc_commonsense_qa_phi-3.5-mini_dsR1.pdf]

# CommonsenseQA, qwen-2.5-7b to DeepSeek-R1

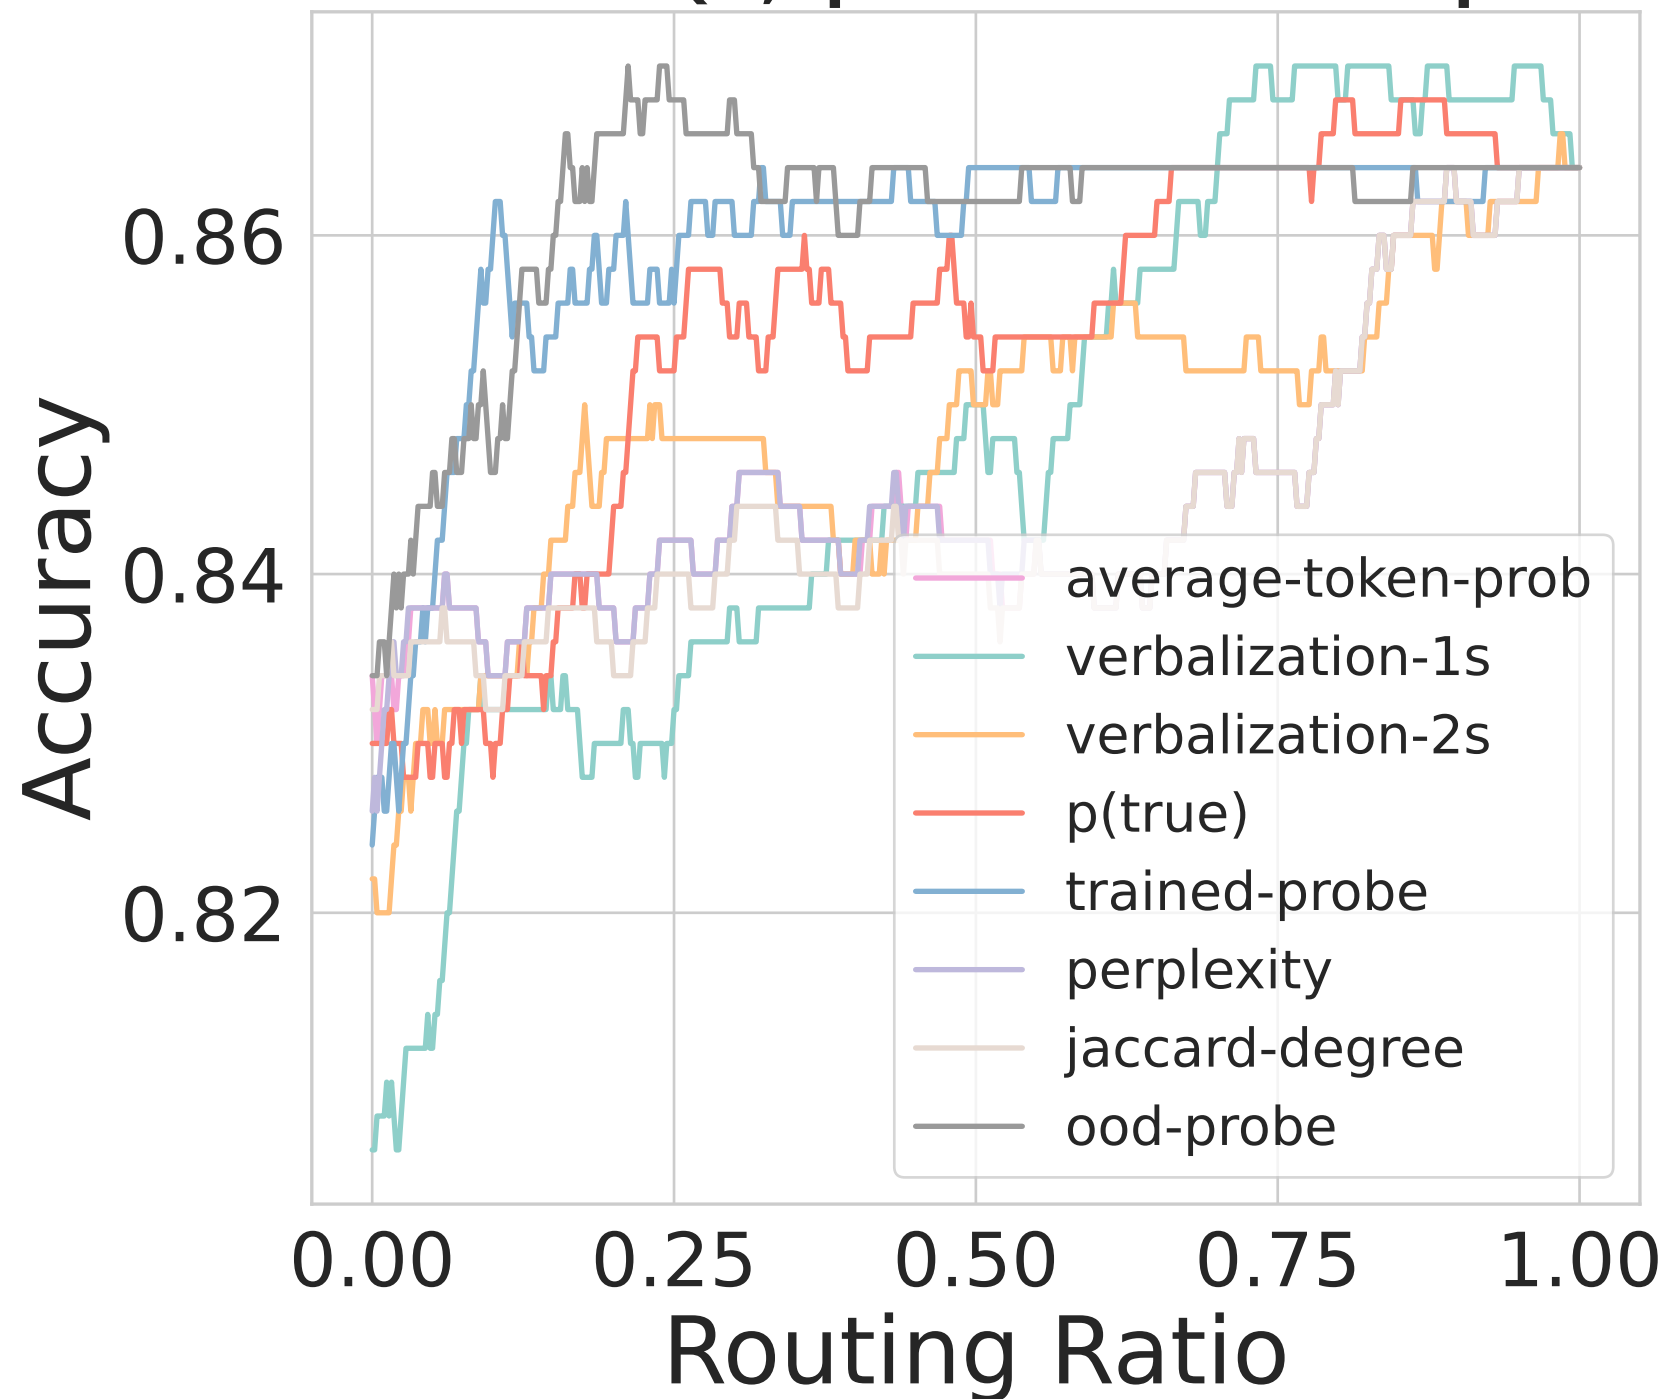

Supplement: supplementary_material [file rr_acc_commonsense_qa_qwen-2.5-7b_dsR1.pdf › Routing_SLM_LLMs/Uncertainty-based Routing/w_legend/to_dsR1/rr_acc_commonsense_qa_qwen-2.5-7b_dsR1.pdf]

# GSM8K, Qwen3-0.6B to DeepSeek-R1

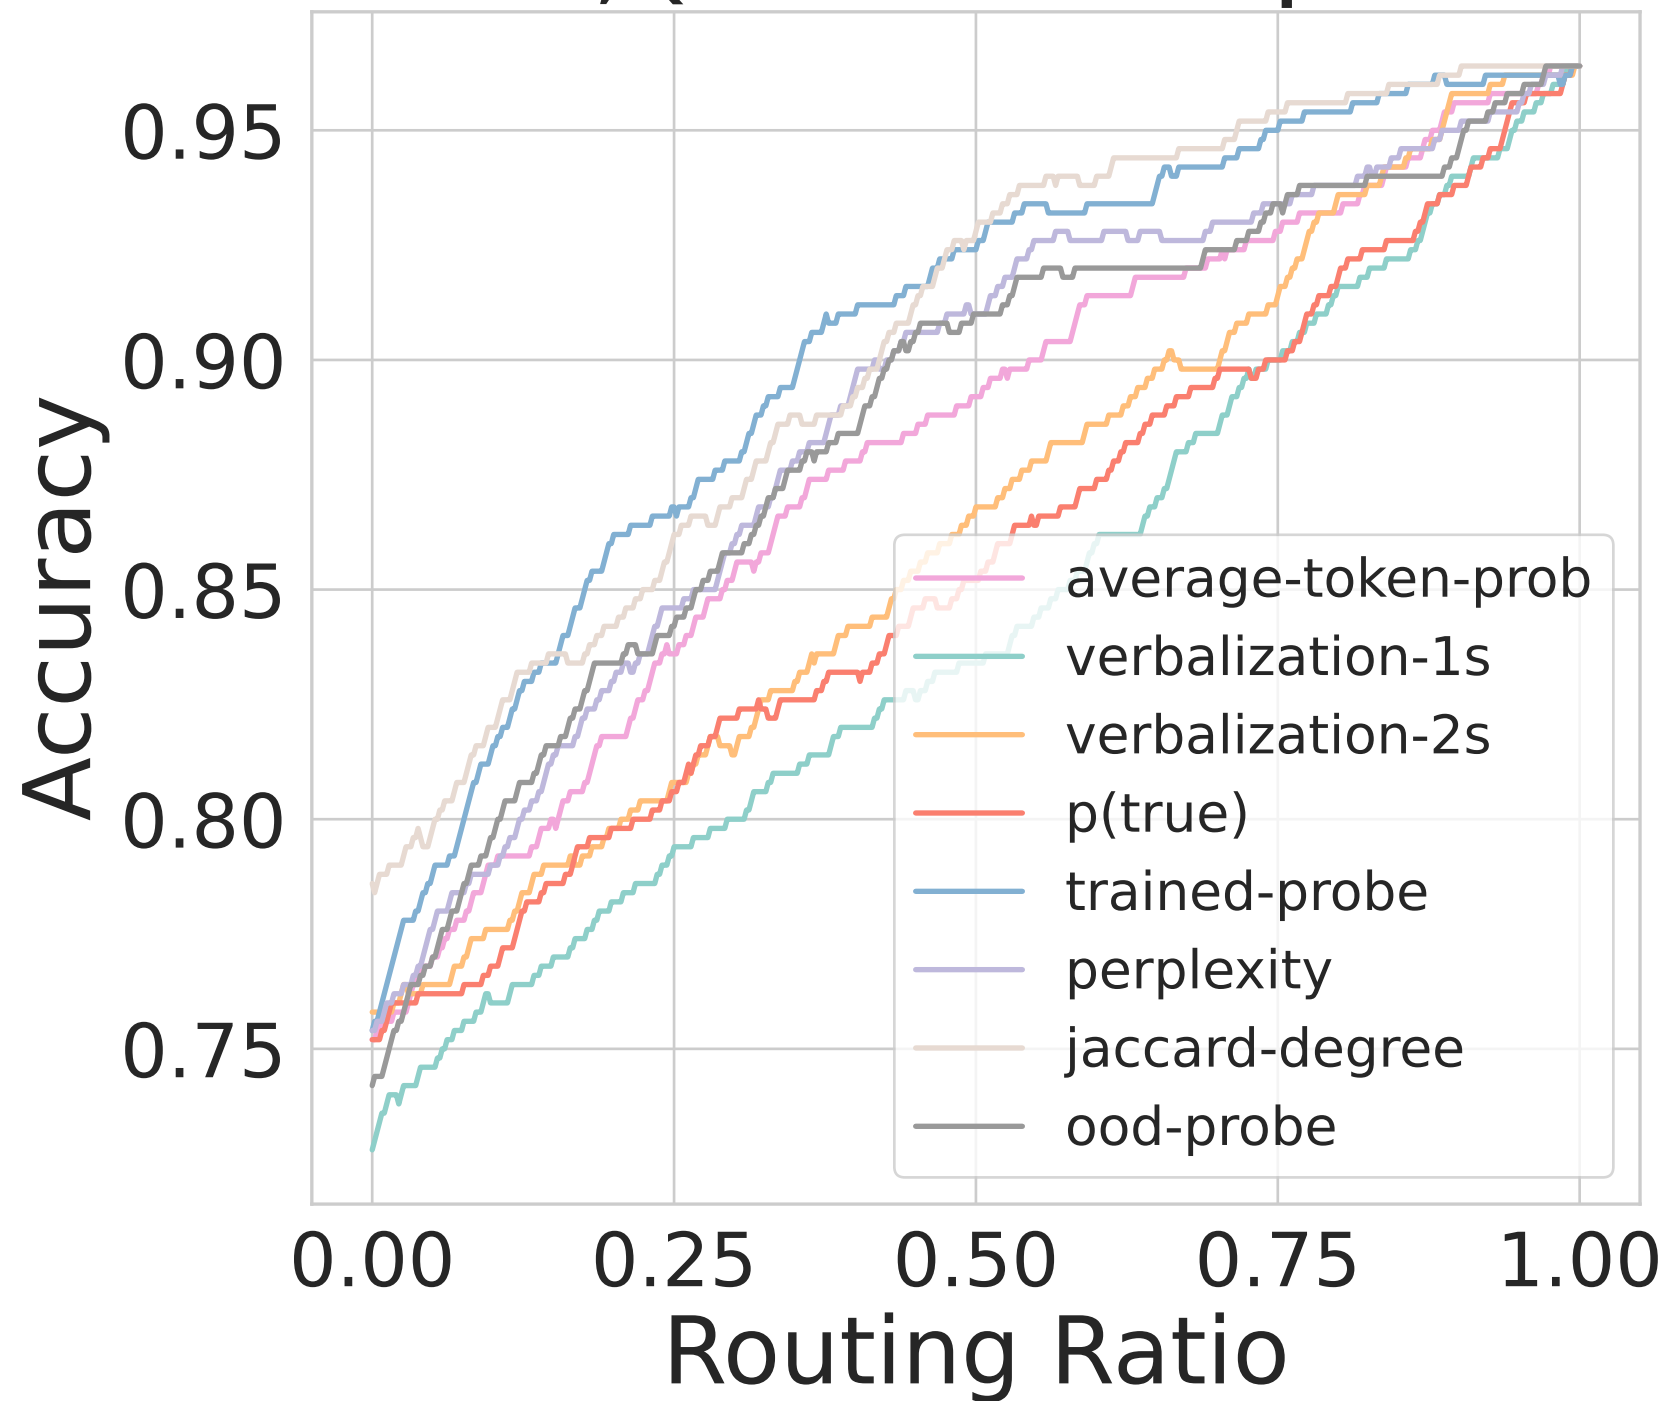

Supplement: supplementary_material [file rr_acc_gsm8k_Qwen3-0.6B_dsR1.pdf › Routing_SLM_LLMs/Uncertainty-based Routing/w_legend/to_dsR1/rr_acc_gsm8k_Qwen3-0.6B_dsR1.pdf]

**GSM8K, Qwen3-1.7B to DeepSeek-R1**

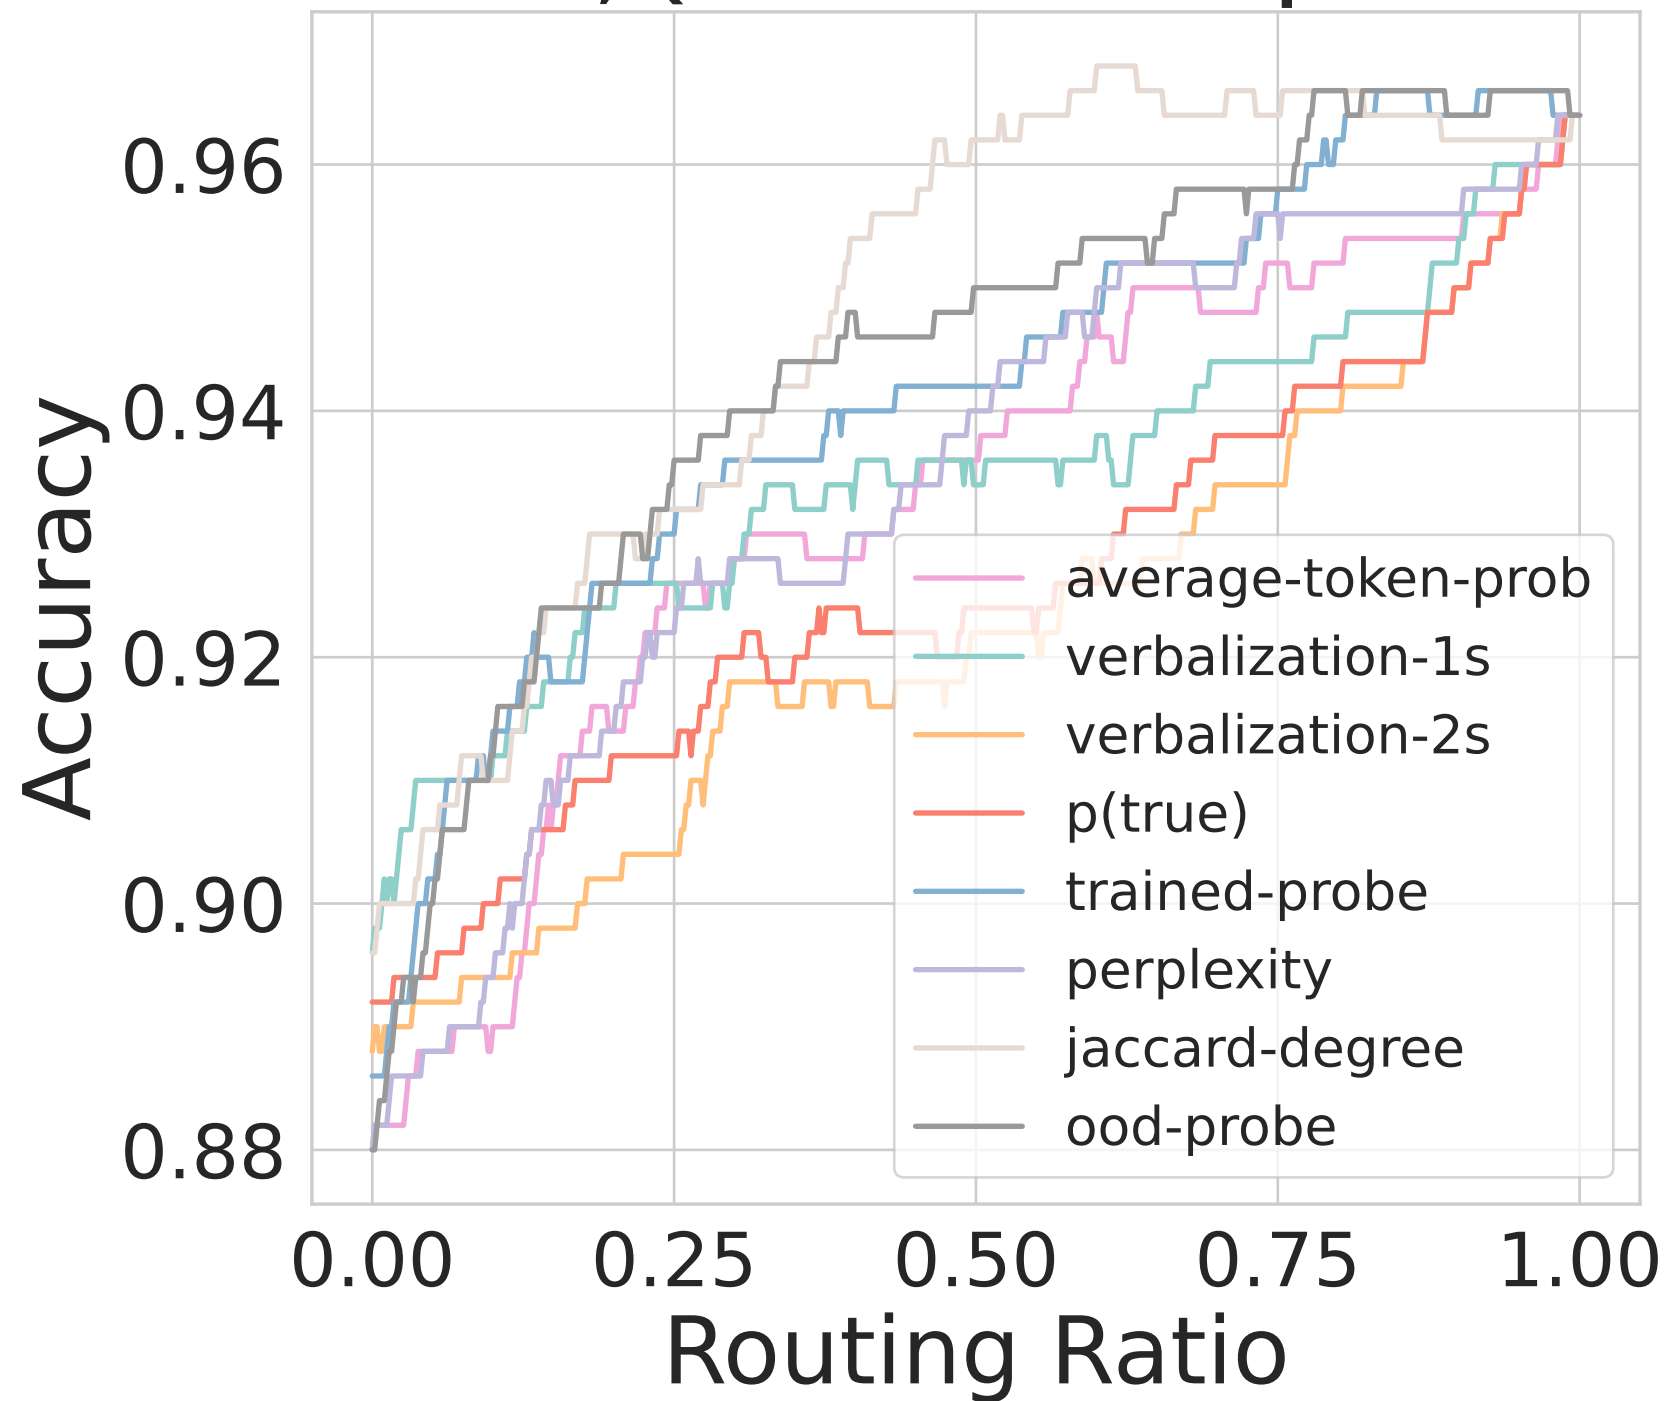

Supplement: supplementary_material [file rr_acc_gsm8k_Qwen3-1.7B_dsR1.pdf › Routing_SLM_LLMs/Uncertainty-based Routing/w_legend/to_dsR1/rr_acc_gsm8k_Qwen3-1.7B_dsR1.pdf]

# GSM8K, Qwen3-4B to DeepSeek-R1

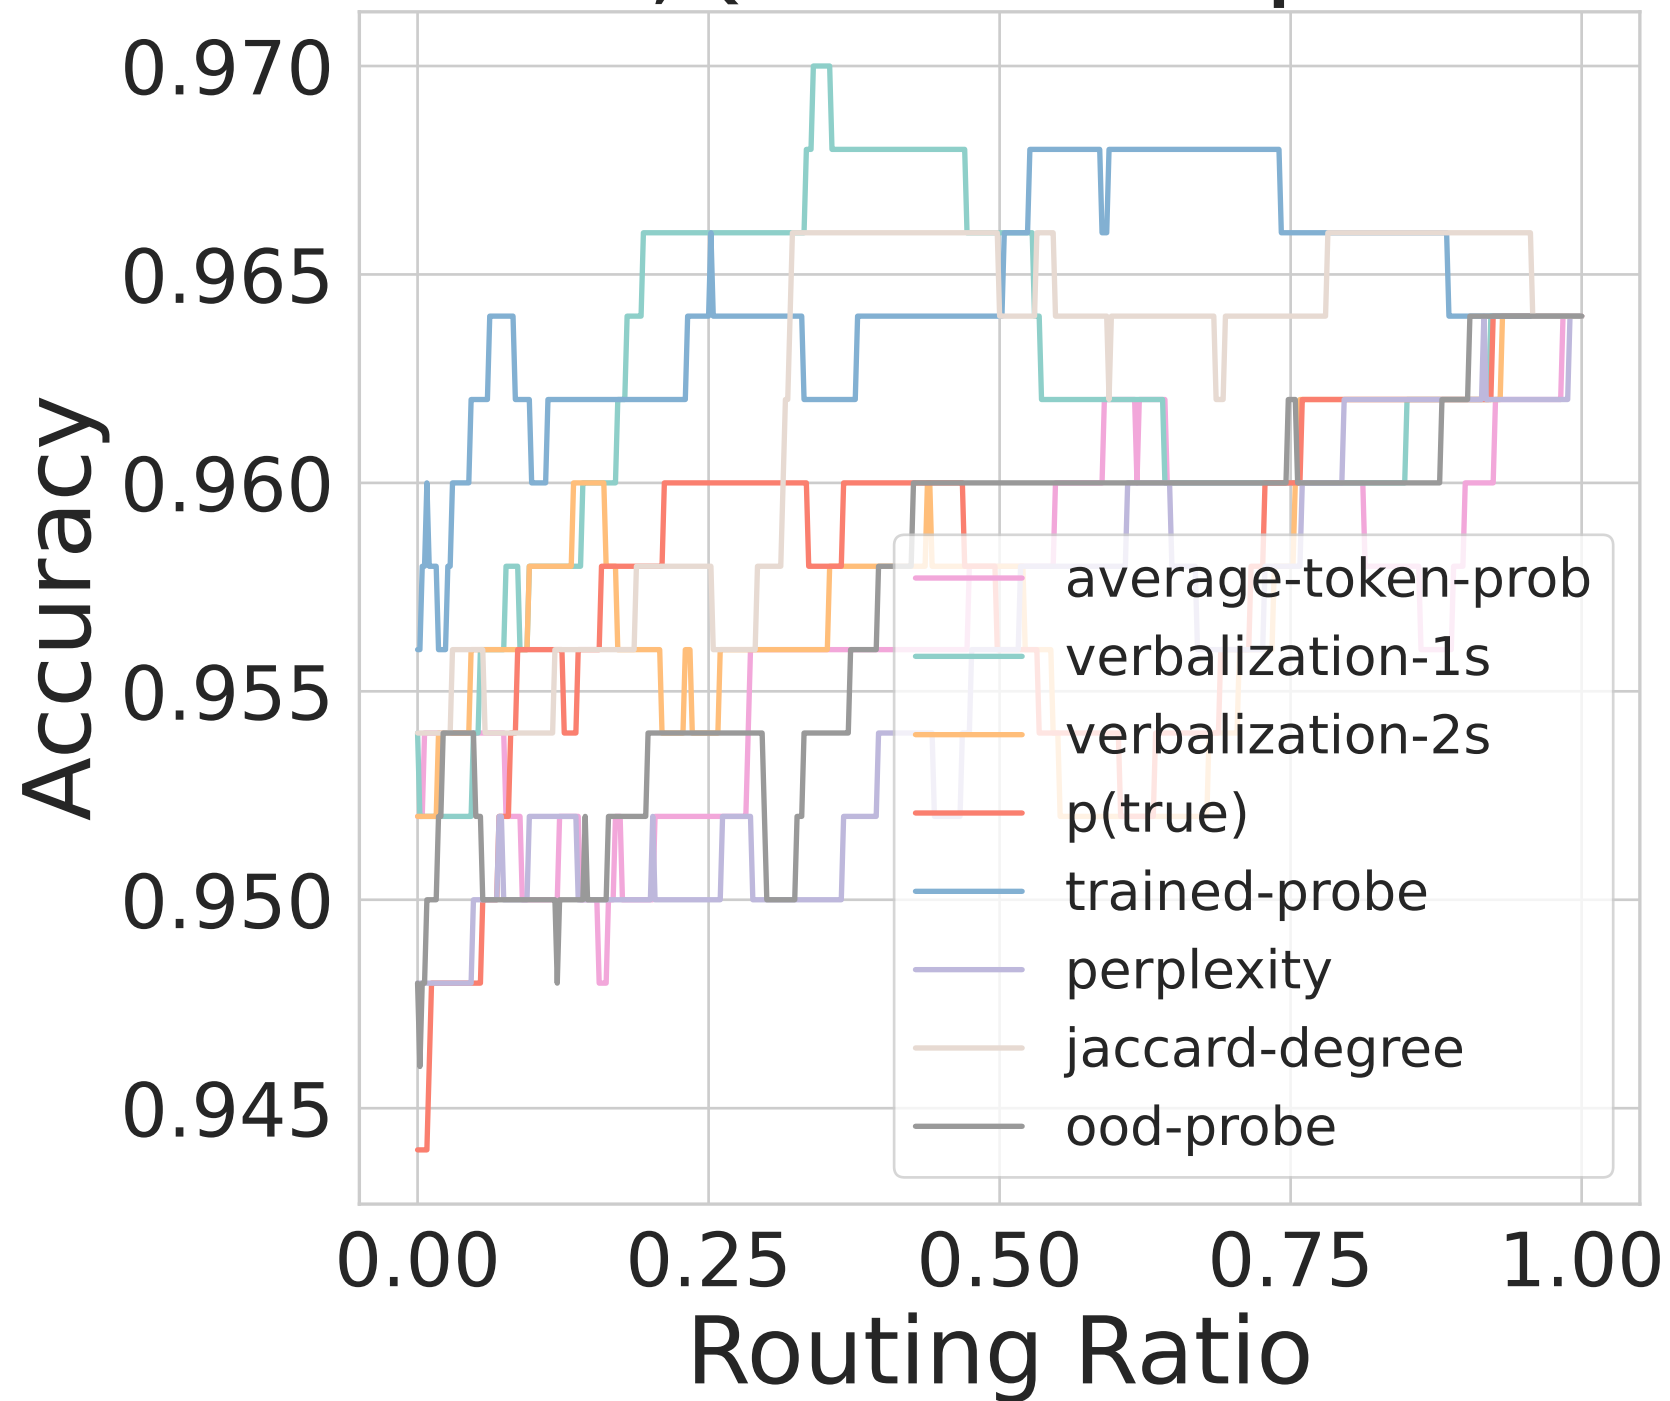

Supplement: supplementary_material [file rr_acc_gsm8k_Qwen3-4B_dsR1.pdf › Routing_SLM_LLMs/Uncertainty-based Routing/w_legend/to_dsR1/rr_acc_gsm8k_Qwen3-4B_dsR1.pdf]

# GSM8K, granite-3.1-8b to DeepSeek-R1

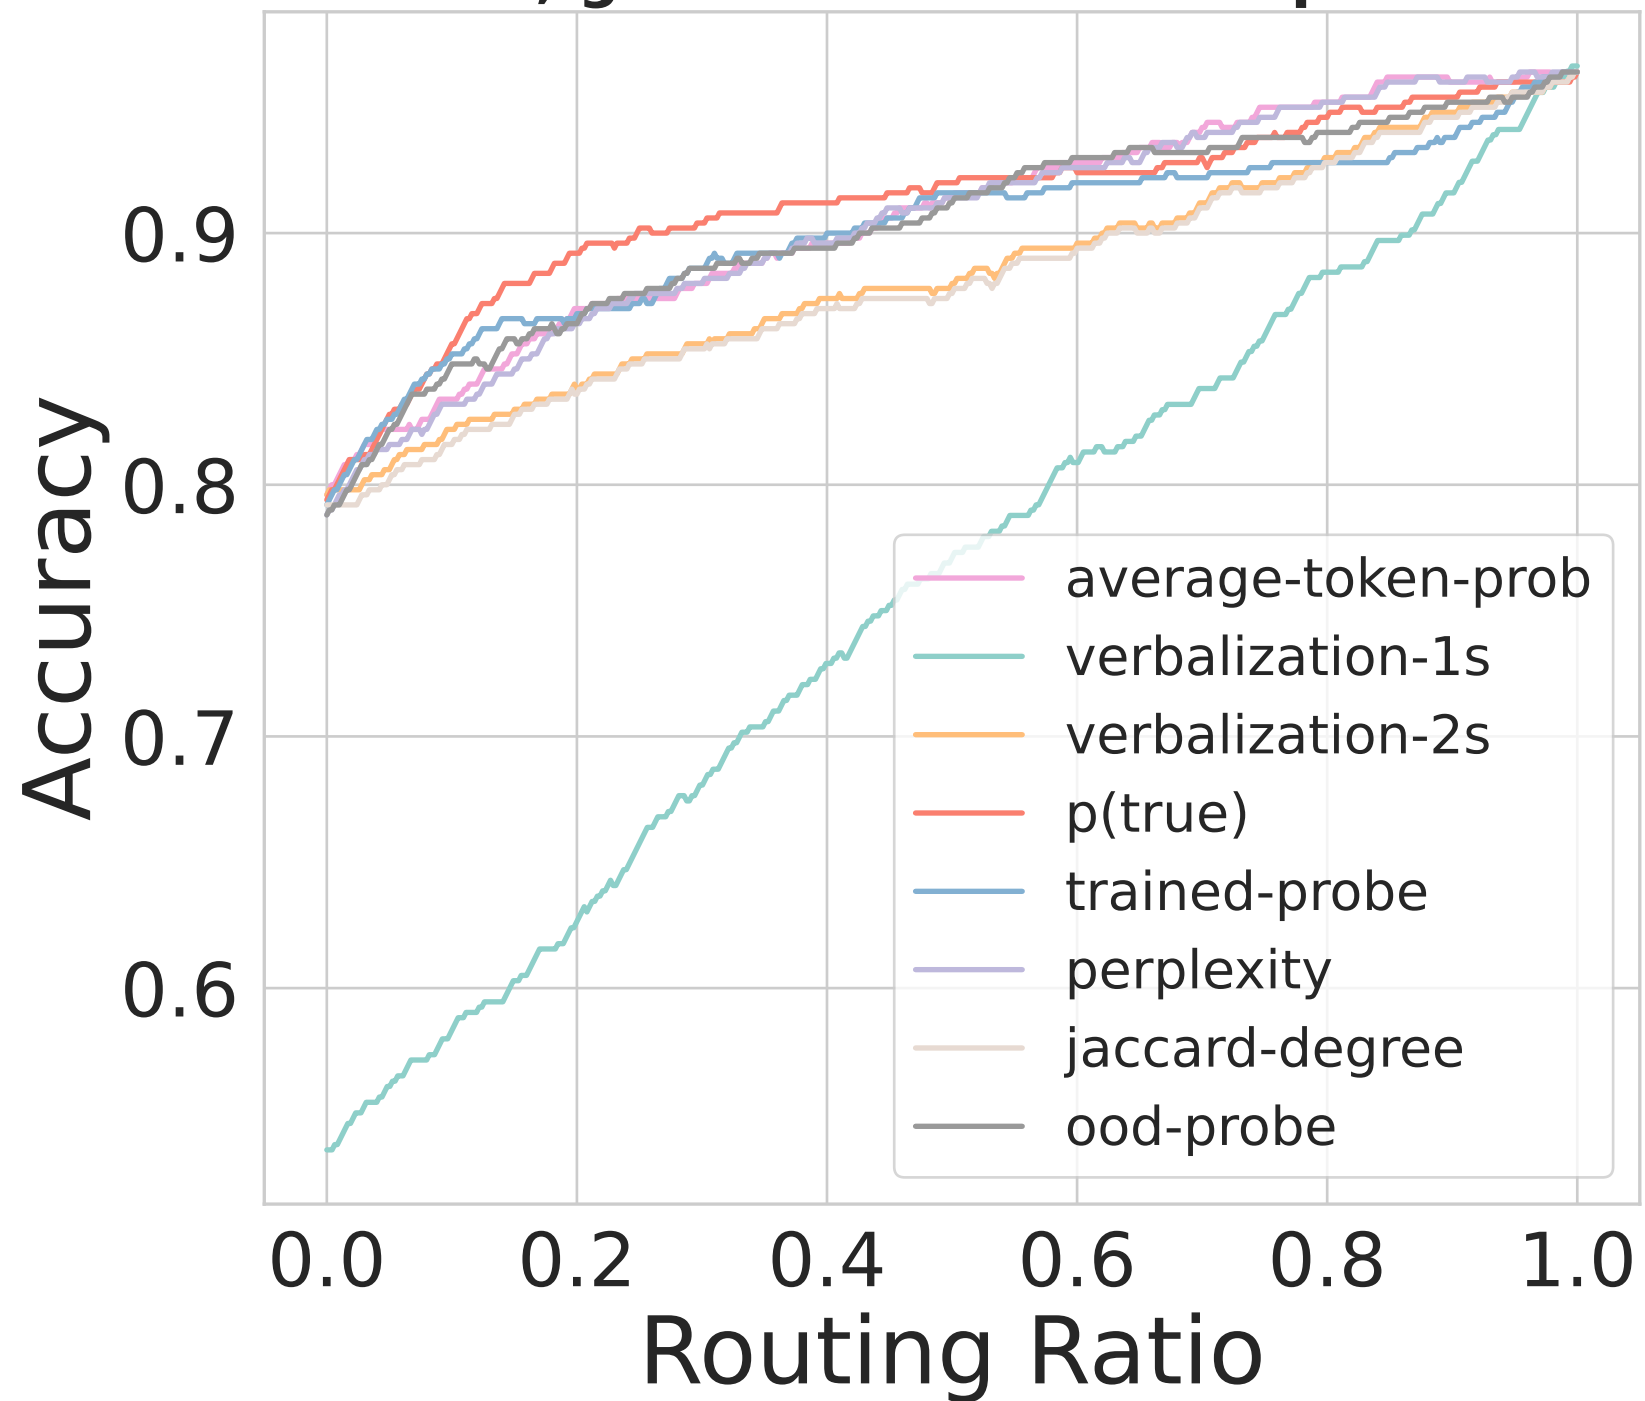

Supplement: supplementary_material [file rr_acc_gsm8k_granite-3.1-8b_dsR1.pdf › Routing_SLM_LLMs/Uncertainty-based Routing/w_legend/to_dsR1/rr_acc_gsm8k_granite-3.1-8b_dsR1.pdf]

# GSM8K, llama-3.1-8b to DeepSeek-R1

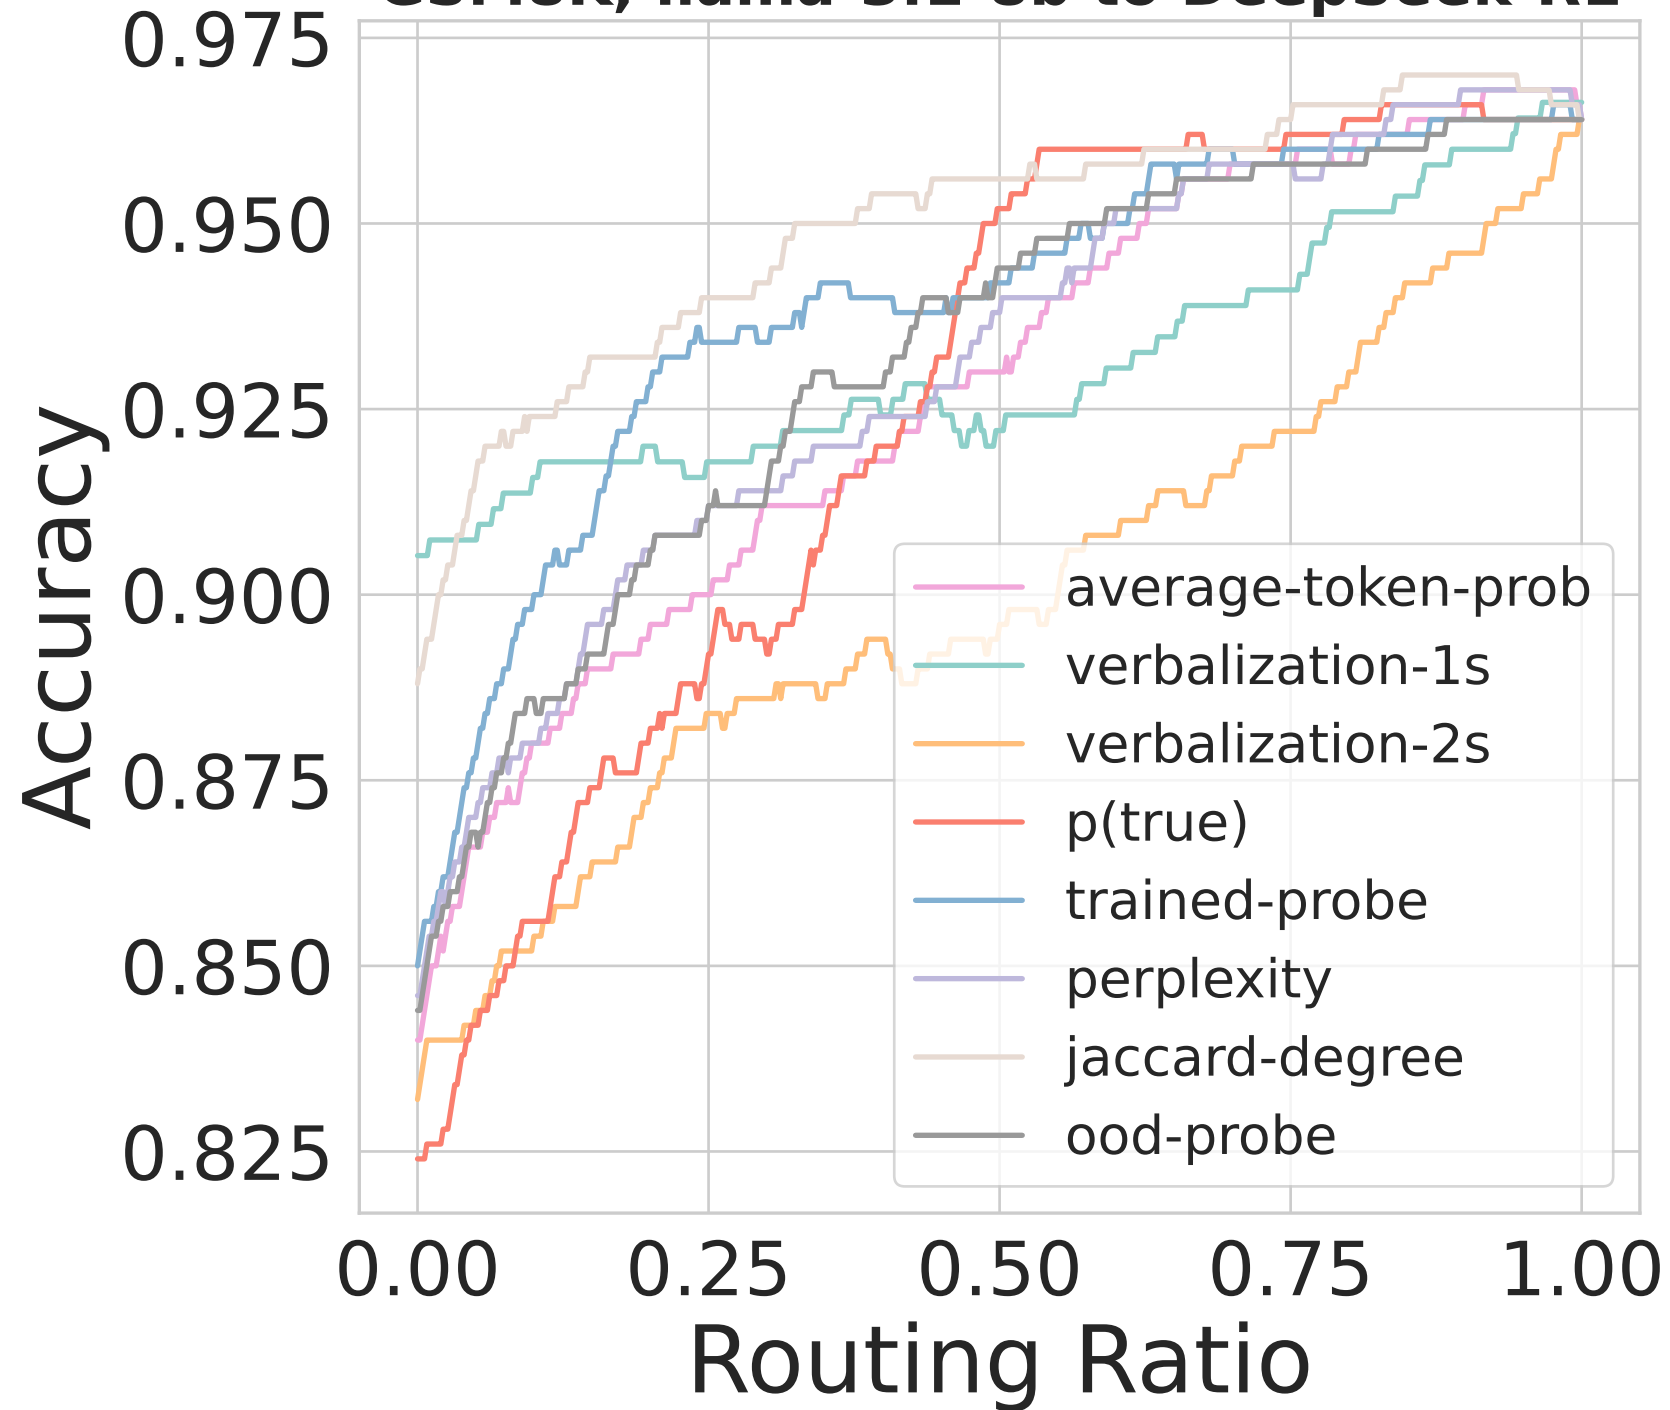

Supplement: supplementary_material [file rr_acc_gsm8k_llama-3.1-8b_dsR1.pdf › Routing_SLM_LLMs/Uncertainty-based Routing/w_legend/to_dsR1/rr_acc_gsm8k_llama-3.1-8b_dsR1.pdf]

# GSM8K, llama-3.2-1b to DeepSeek-R1

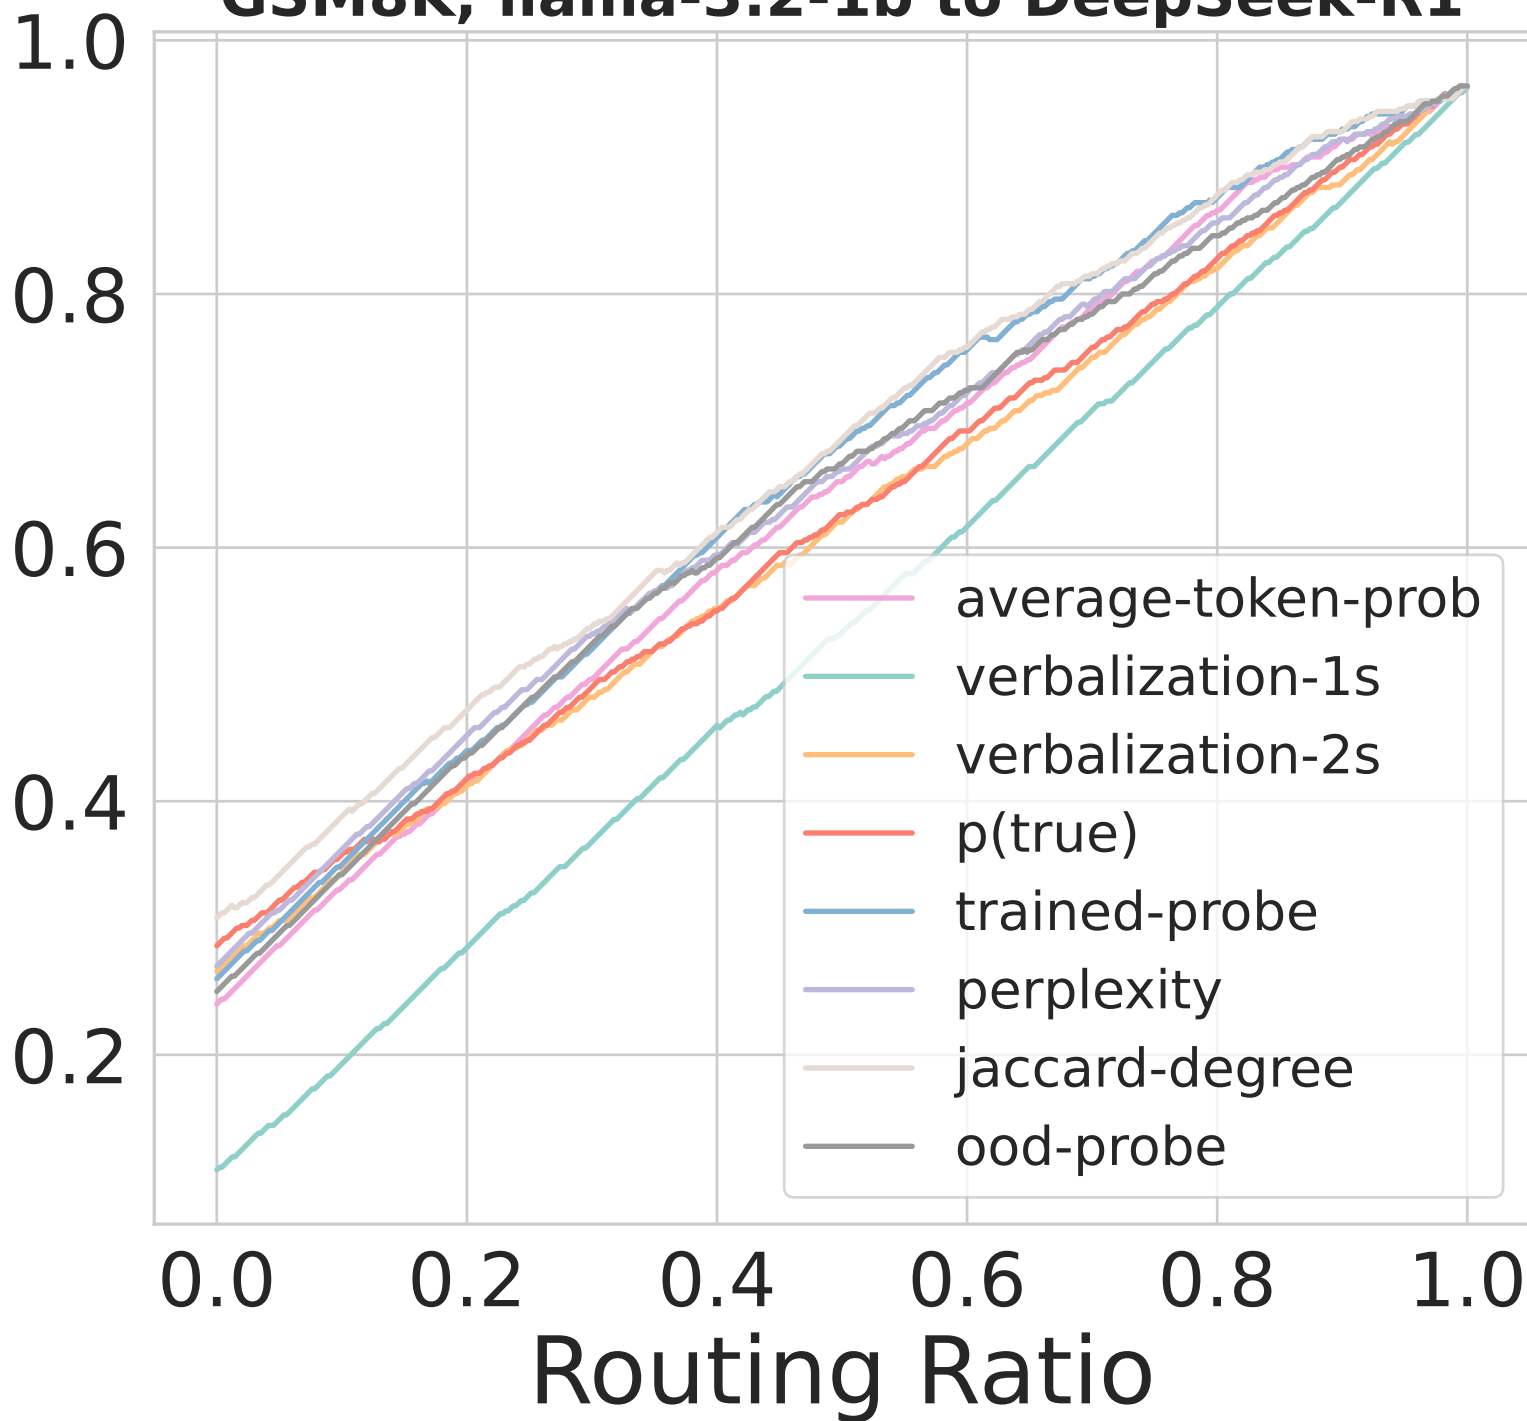

Supplement: supplementary_material [file rr_acc_gsm8k_llama-3.2-1b_dsR1.pdf › Routing_SLM_LLMs/Uncertainty-based Routing/w_legend/to_dsR1/rr_acc_gsm8k_llama-3.2-1b_dsR1.pdf]

# GSM8K, llama-3.2-3b to DeepSeek-R1

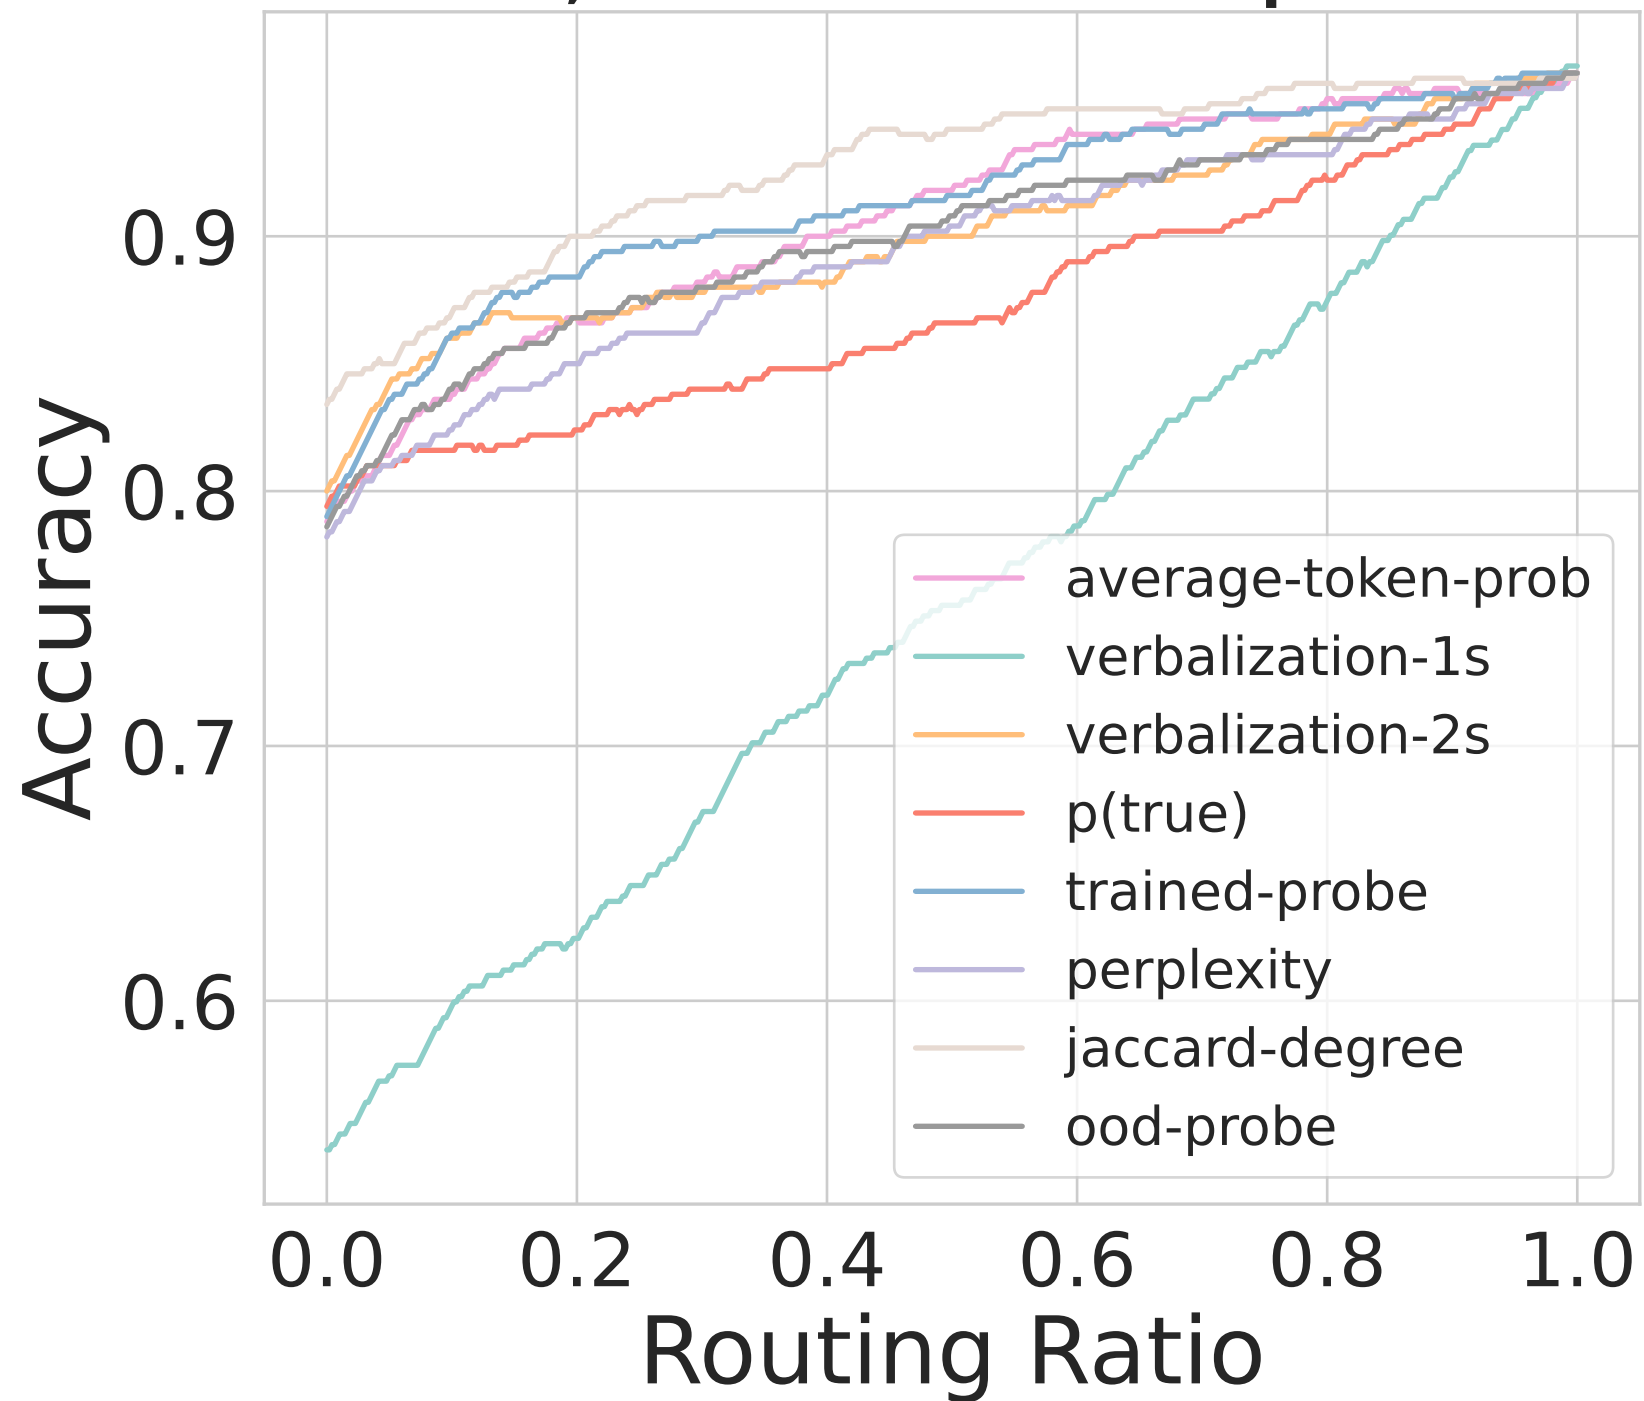

Supplement: supplementary_material [file rr_acc_gsm8k_llama-3.2-3b_dsR1.pdf › Routing_SLM_LLMs/Uncertainty-based Routing/w_legend/to_dsR1/rr_acc_gsm8k_llama-3.2-3b_dsR1.pdf]

**GSM8K, phi-3.5-mini to DeepSeek-R1**

Accuracy

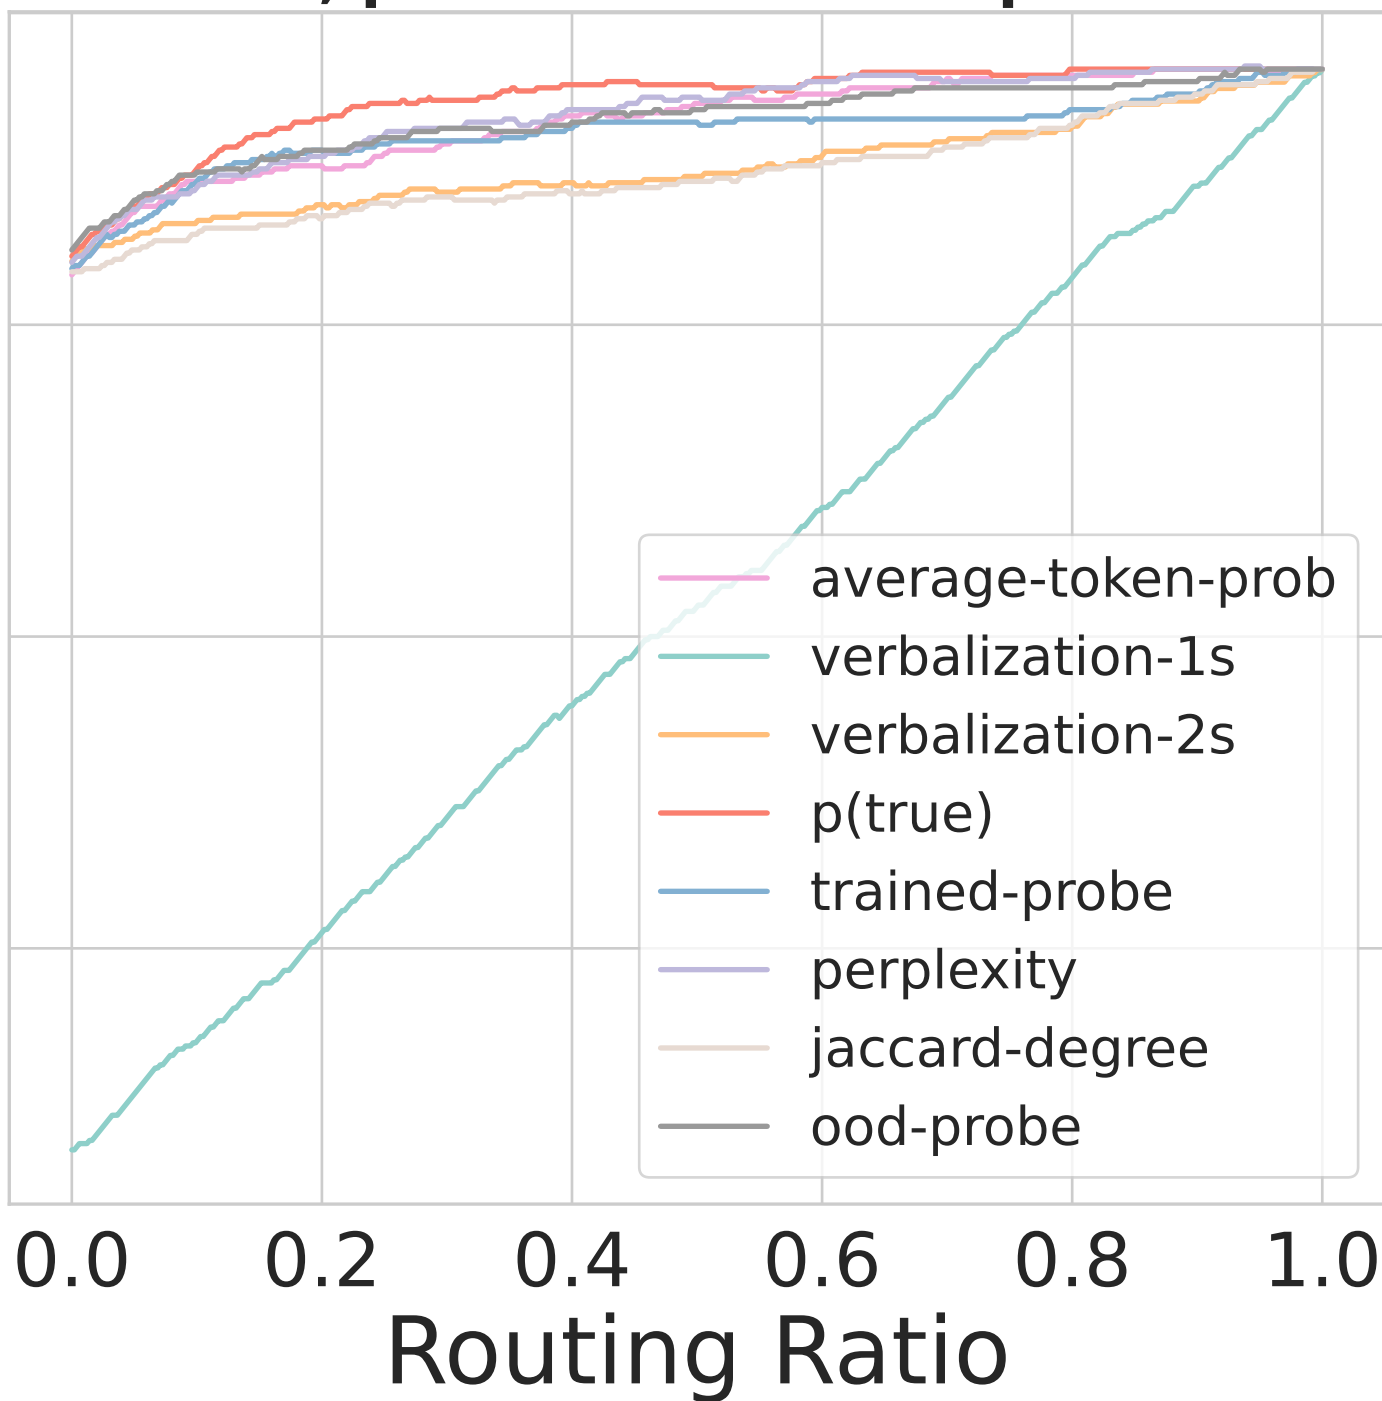

Supplement: supplementary_material [file rr_acc_gsm8k_phi-3.5-mini_dsR1.pdf › Routing_SLM_LLMs/Uncertainty-based Routing/w_legend/to_dsR1/rr_acc_gsm8k_phi-3.5-mini_dsR1.pdf]

# GSM8K, phi-4-mini-reasoning to DeepSeek-R1

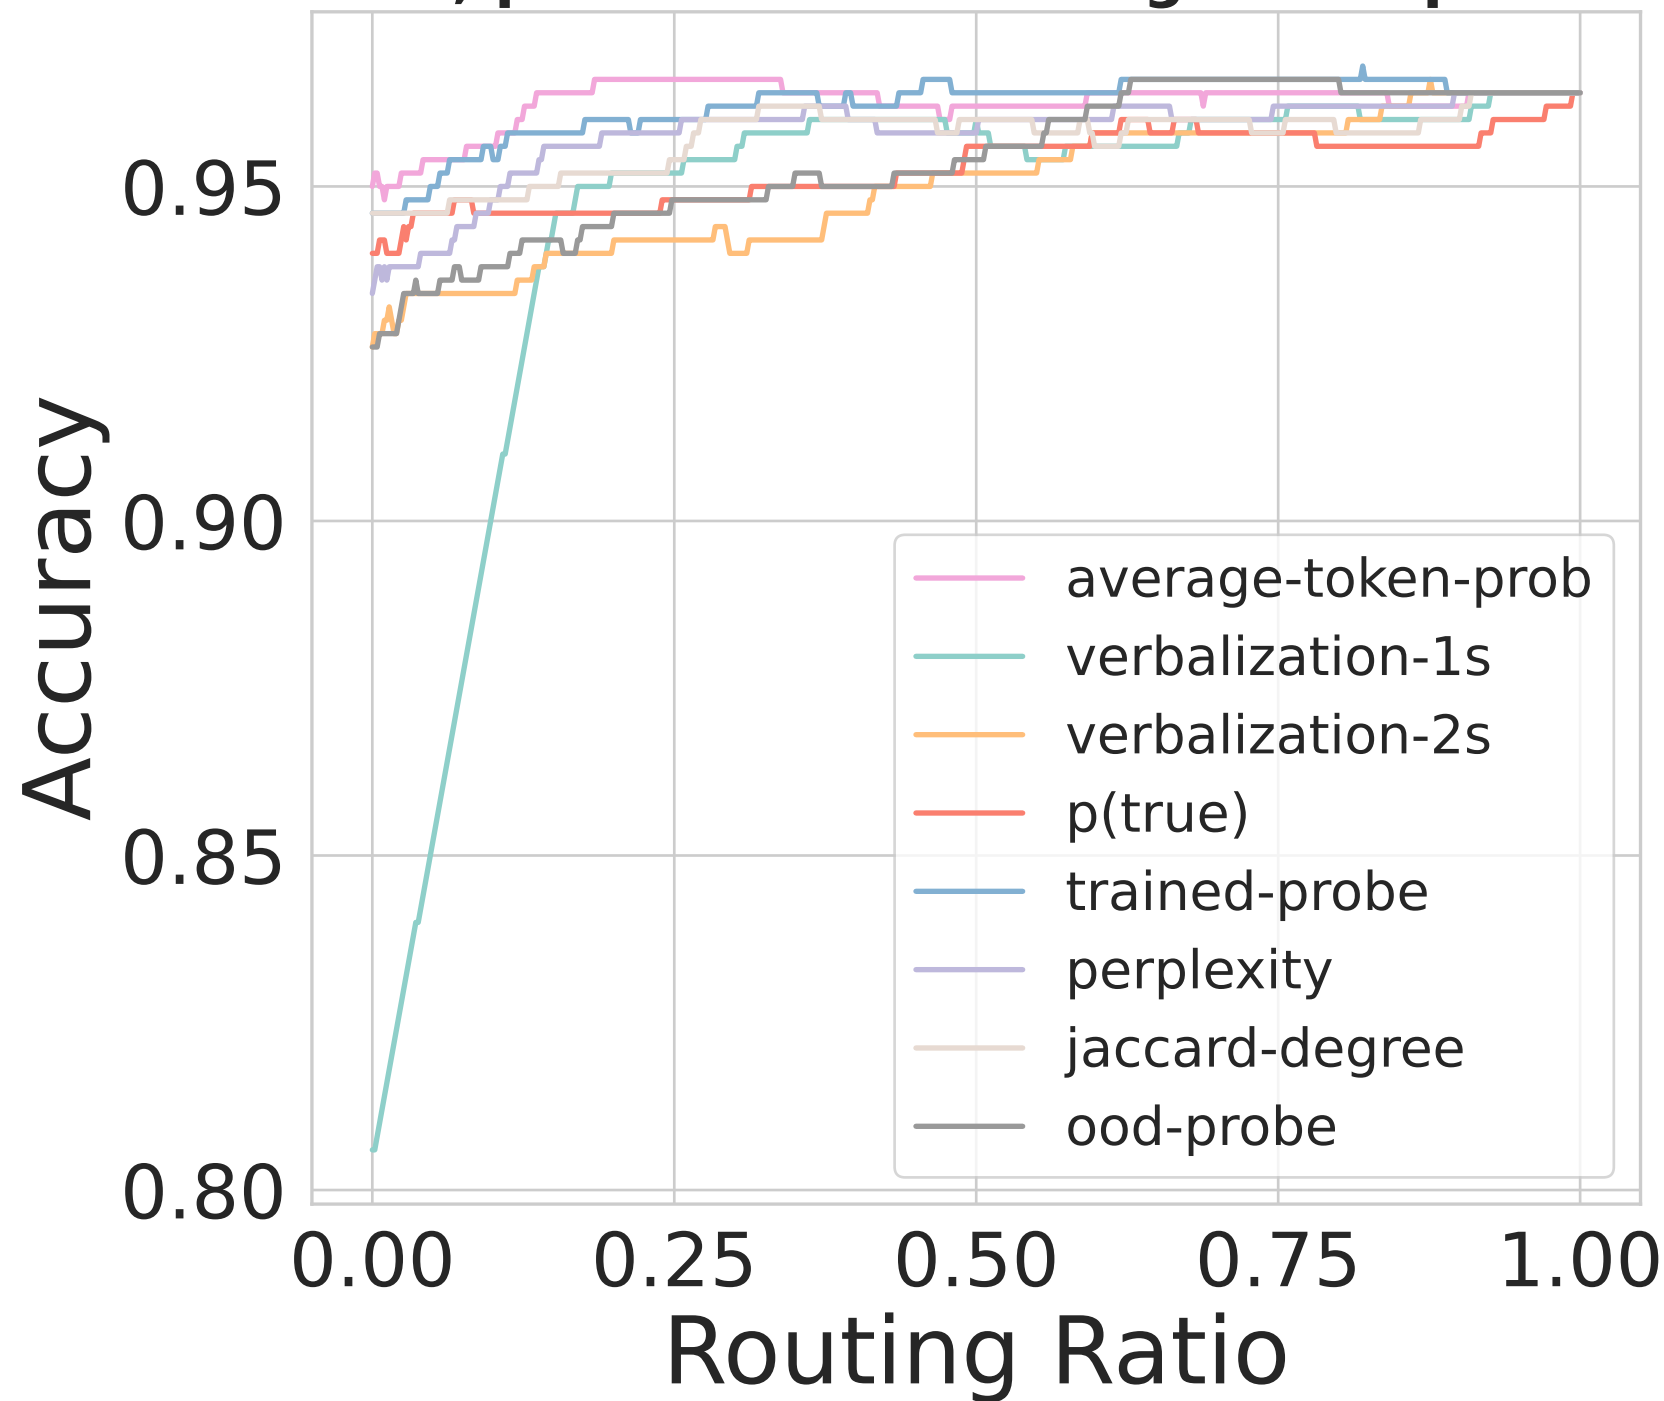

Supplement: supplementary_material [file rr_acc_gsm8k_phi-4-mini-reasoning_dsR1.pdf › Routing_SLM_LLMs/Uncertainty-based Routing/w_legend/to_dsR1/rr_acc_gsm8k_phi-4-mini-reasoning_dsR1.pdf]

# GSM8K, qwen-2.5-7b to DeepSeek-R1

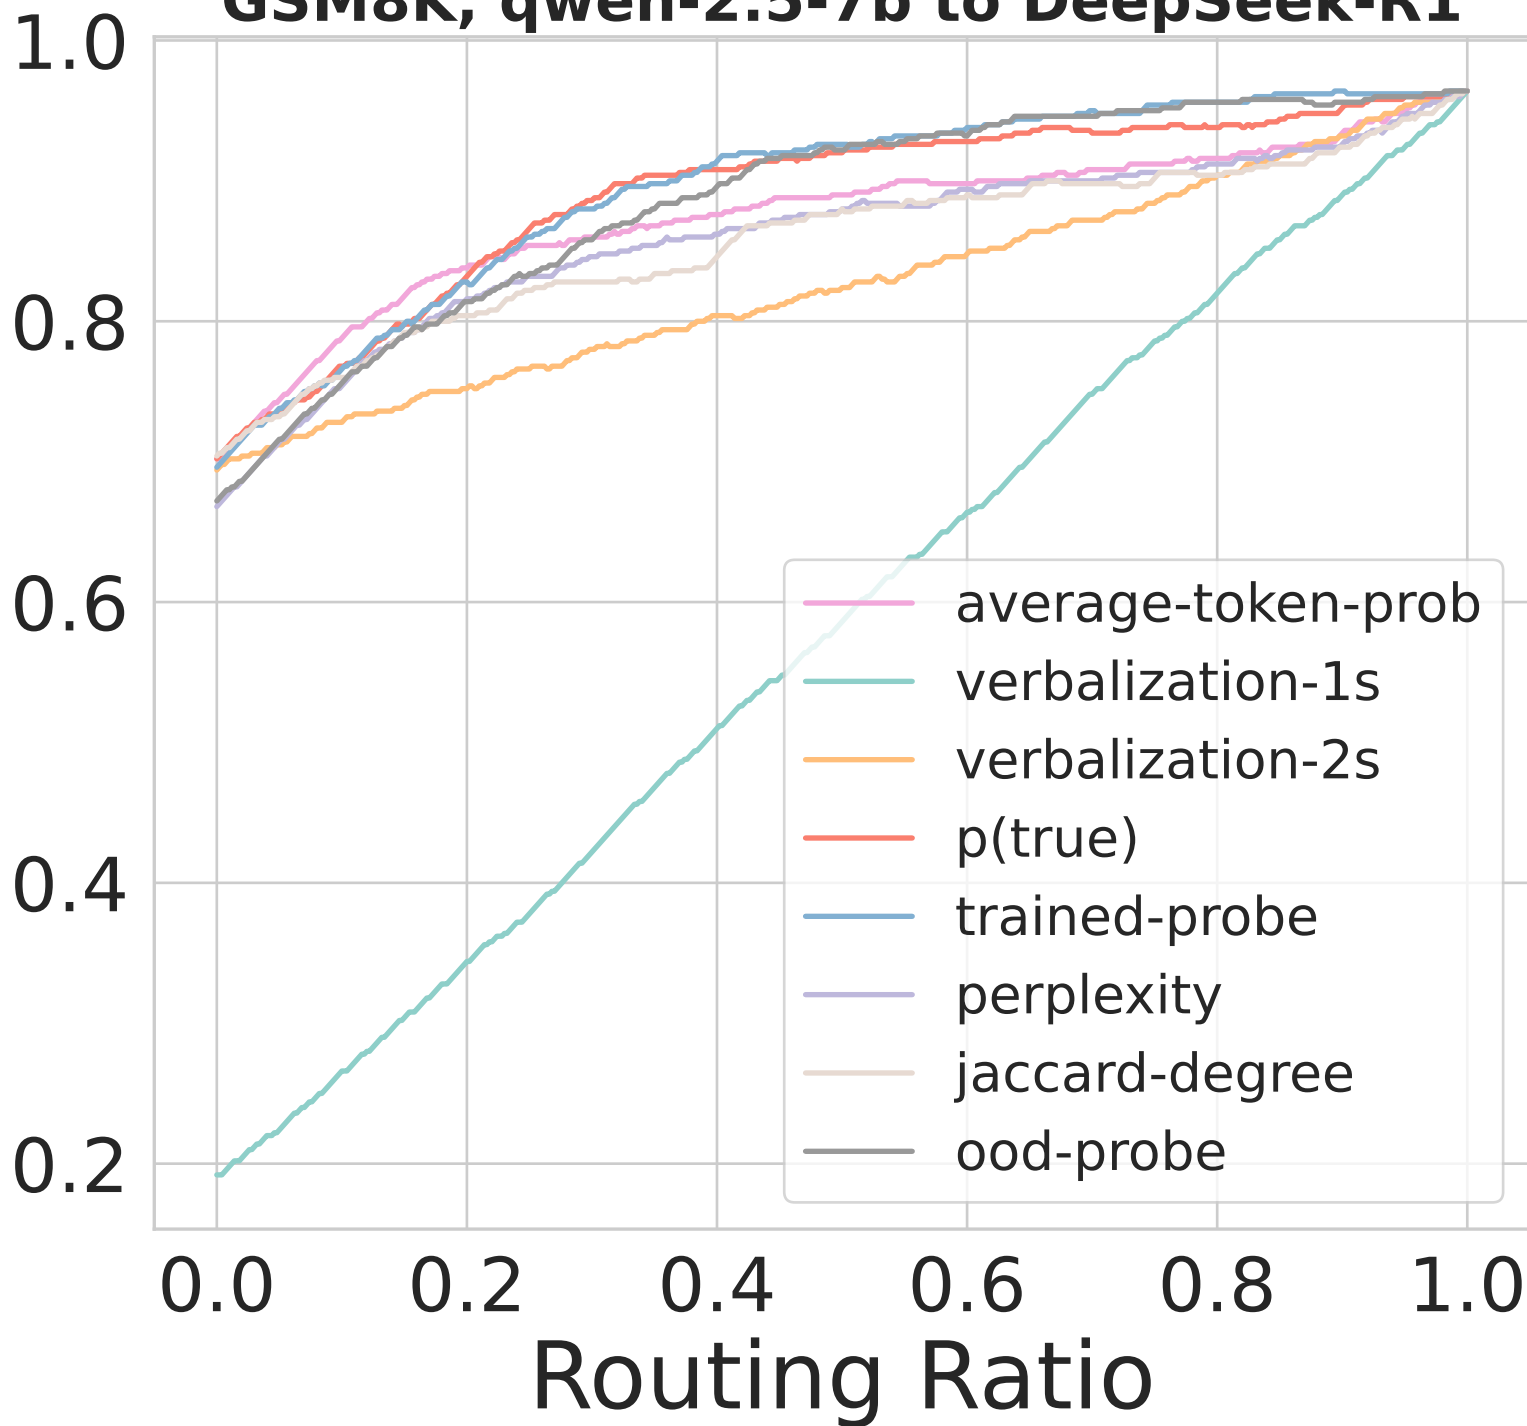

Supplement: supplementary_material [file rr_acc_gsm8k_qwen-2.5-7b_dsR1.pdf › Routing_SLM_LLMs/Uncertainty-based Routing/w_legend/to_dsR1/rr_acc_gsm8k_qwen-2.5-7b_dsR1.pdf]

# GSM8K, rwkv to DeepSeek-R1

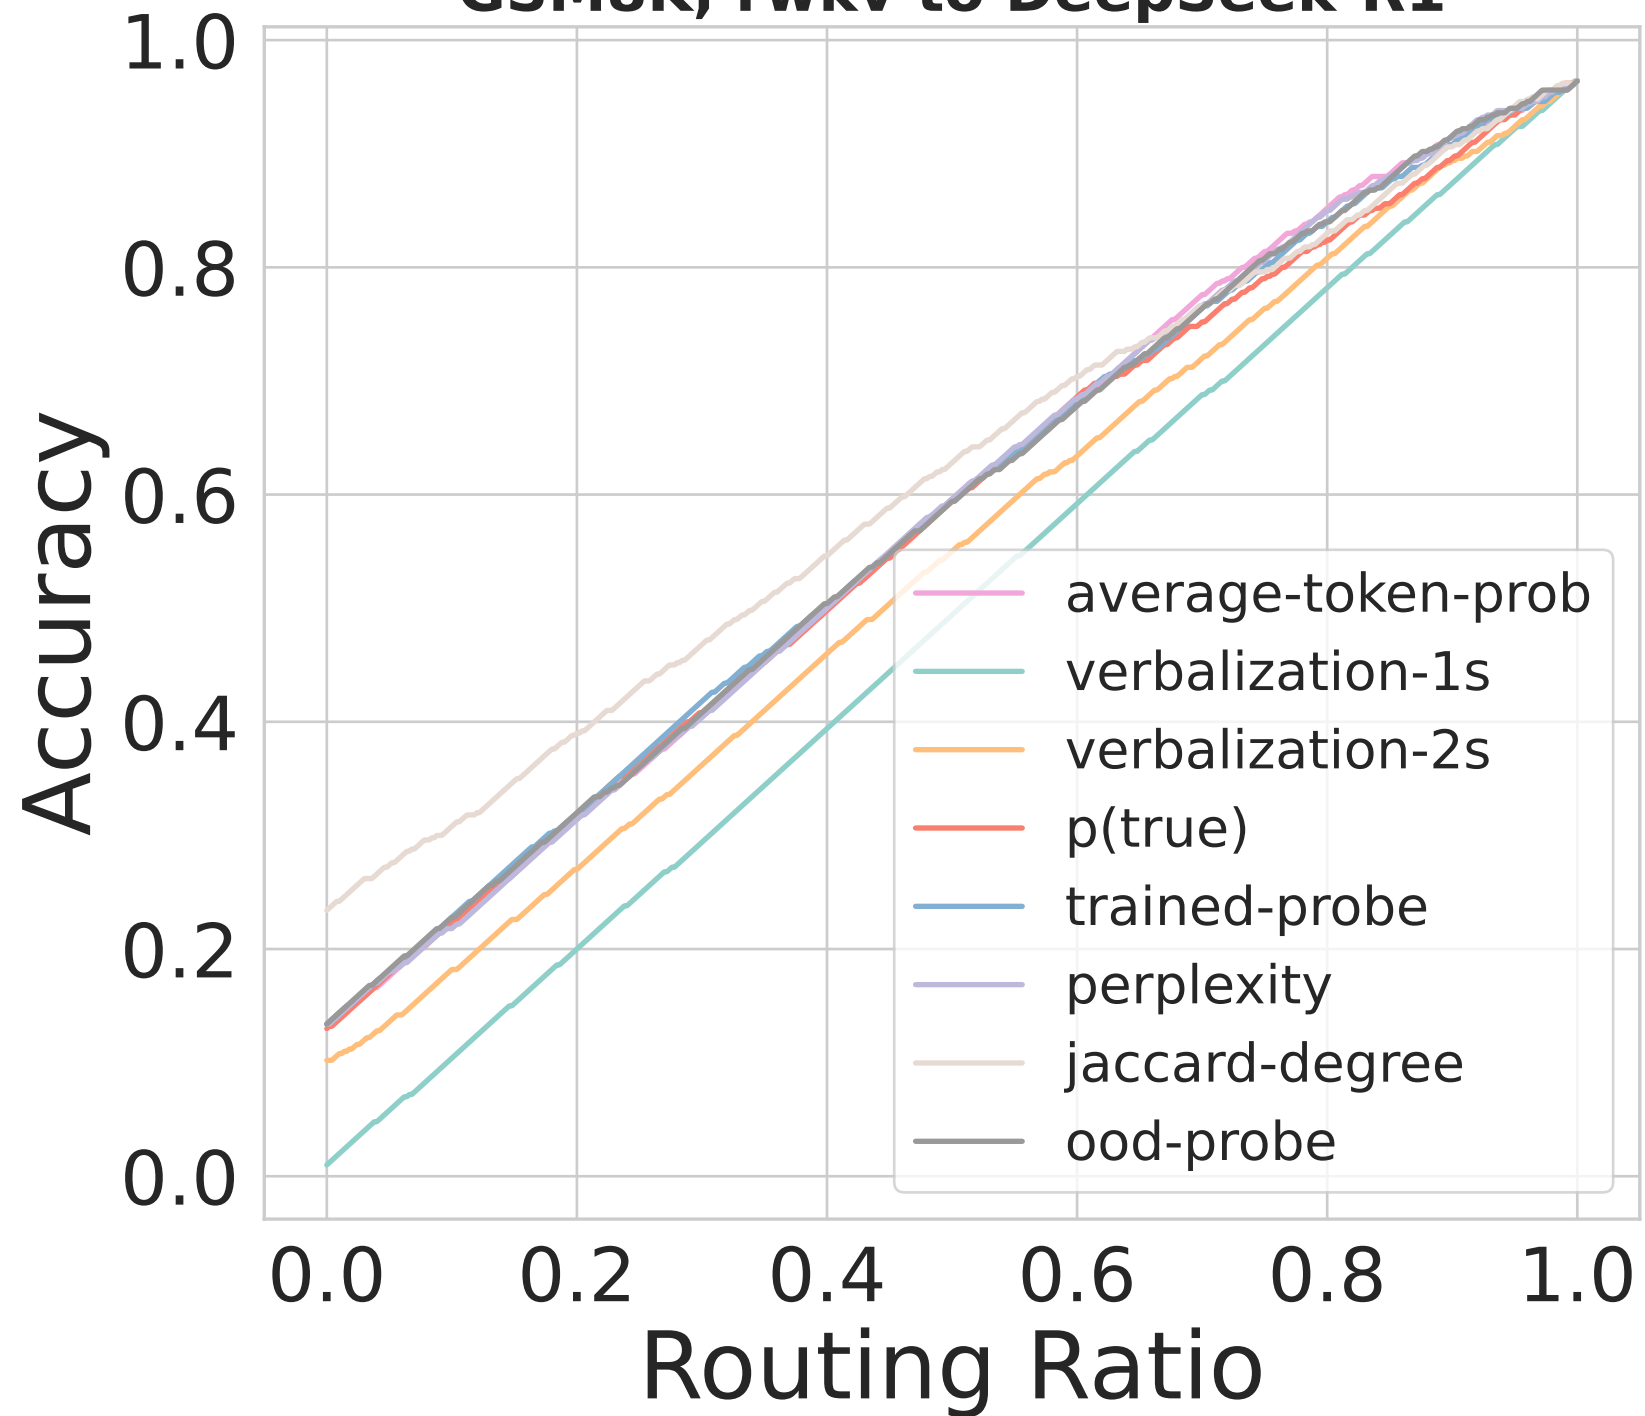

Supplement: supplementary_material [file rr_acc_gsm8k_rwkv_dsR1.pdf › Routing_SLM_LLMs/Uncertainty-based Routing/w_legend/to_dsR1/rr_acc_gsm8k_rwkv_dsR1.pdf]

# HellaSwag, Qwen3-4B to DeepSeek-R1

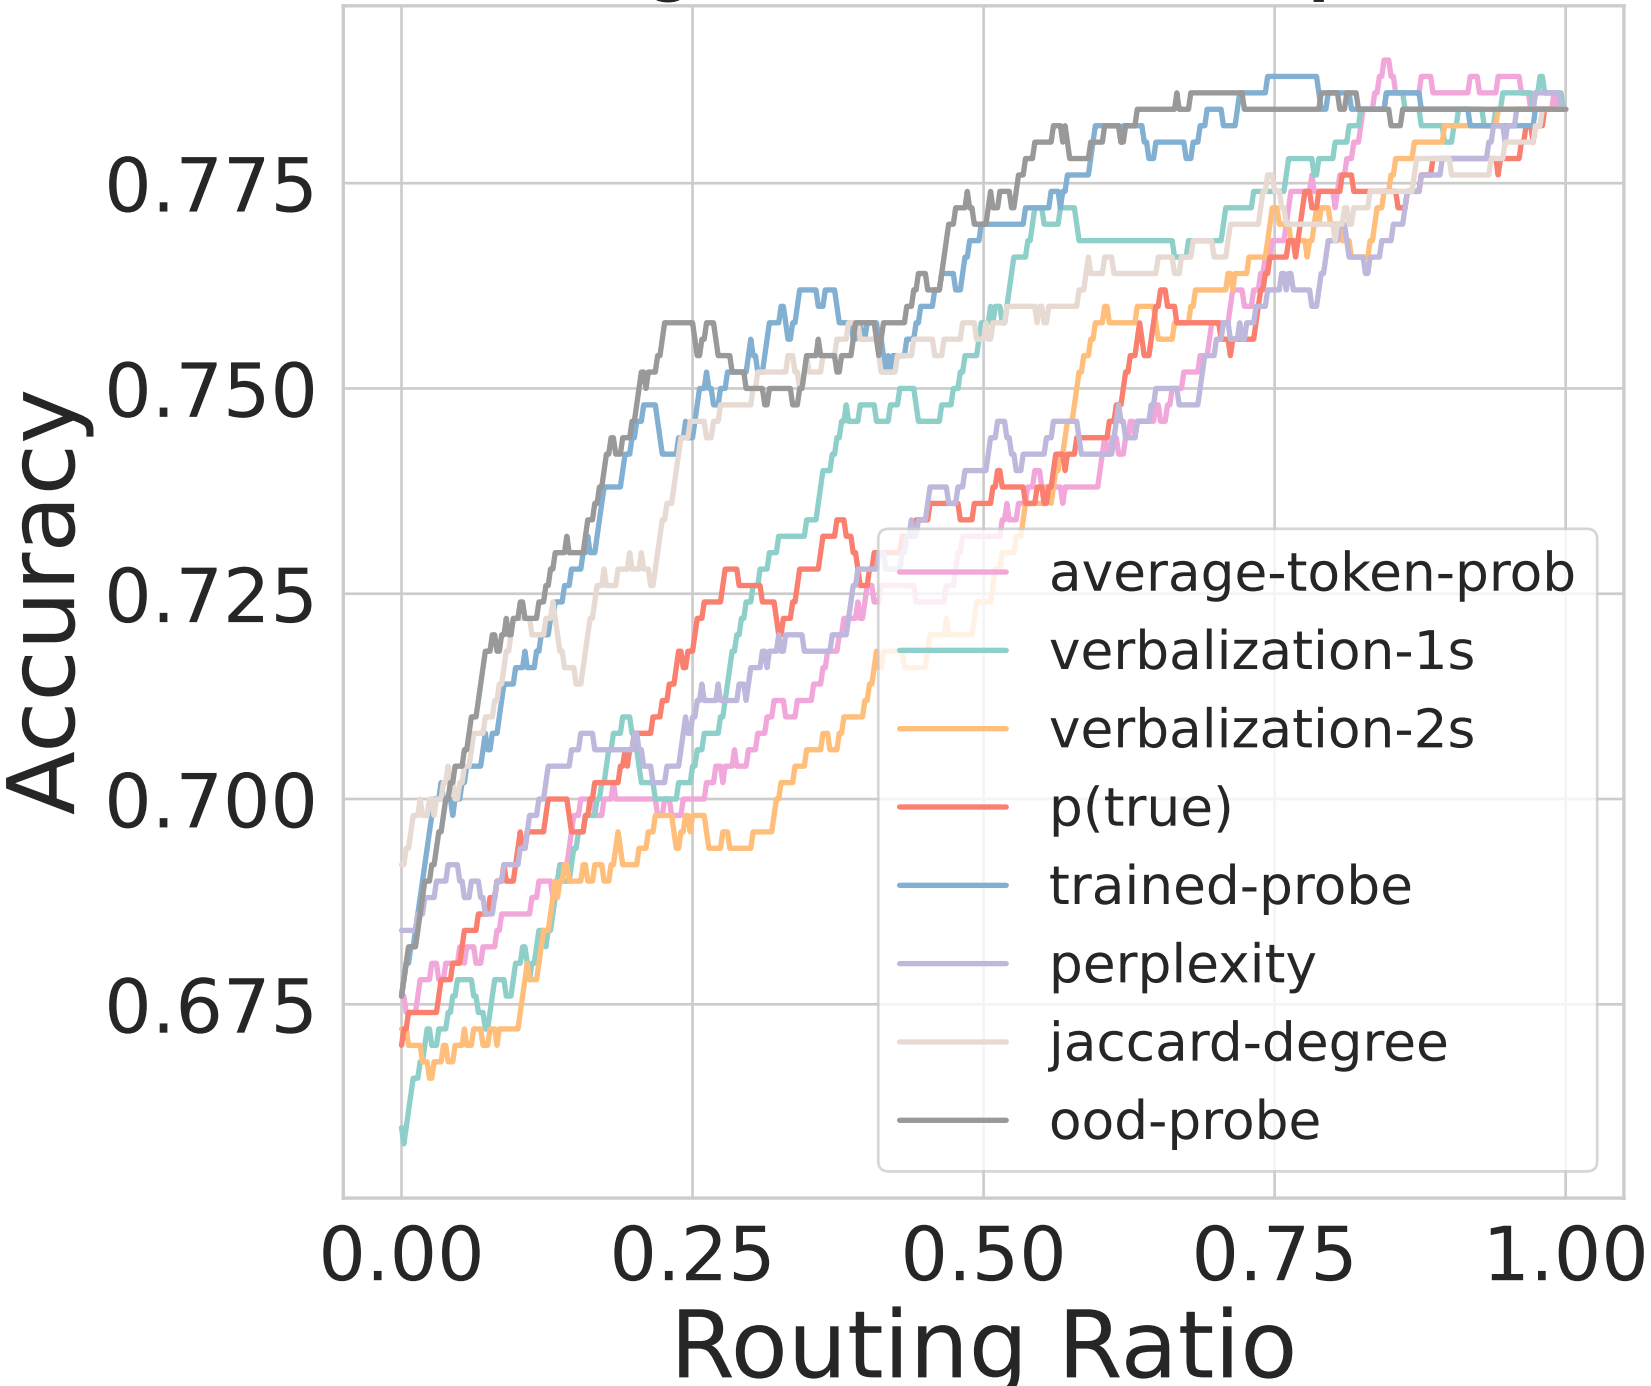

Supplement: supplementary_material [file rr_acc_hellaswag_Qwen3-4B_dsR1.pdf › Routing_SLM_LLMs/Uncertainty-based Routing/w_legend/to_dsR1/rr_acc_hellaswag_Qwen3-4B_dsR1.pdf]

# HellaSwag, granite-3.1-8b to DeepSeek-R1

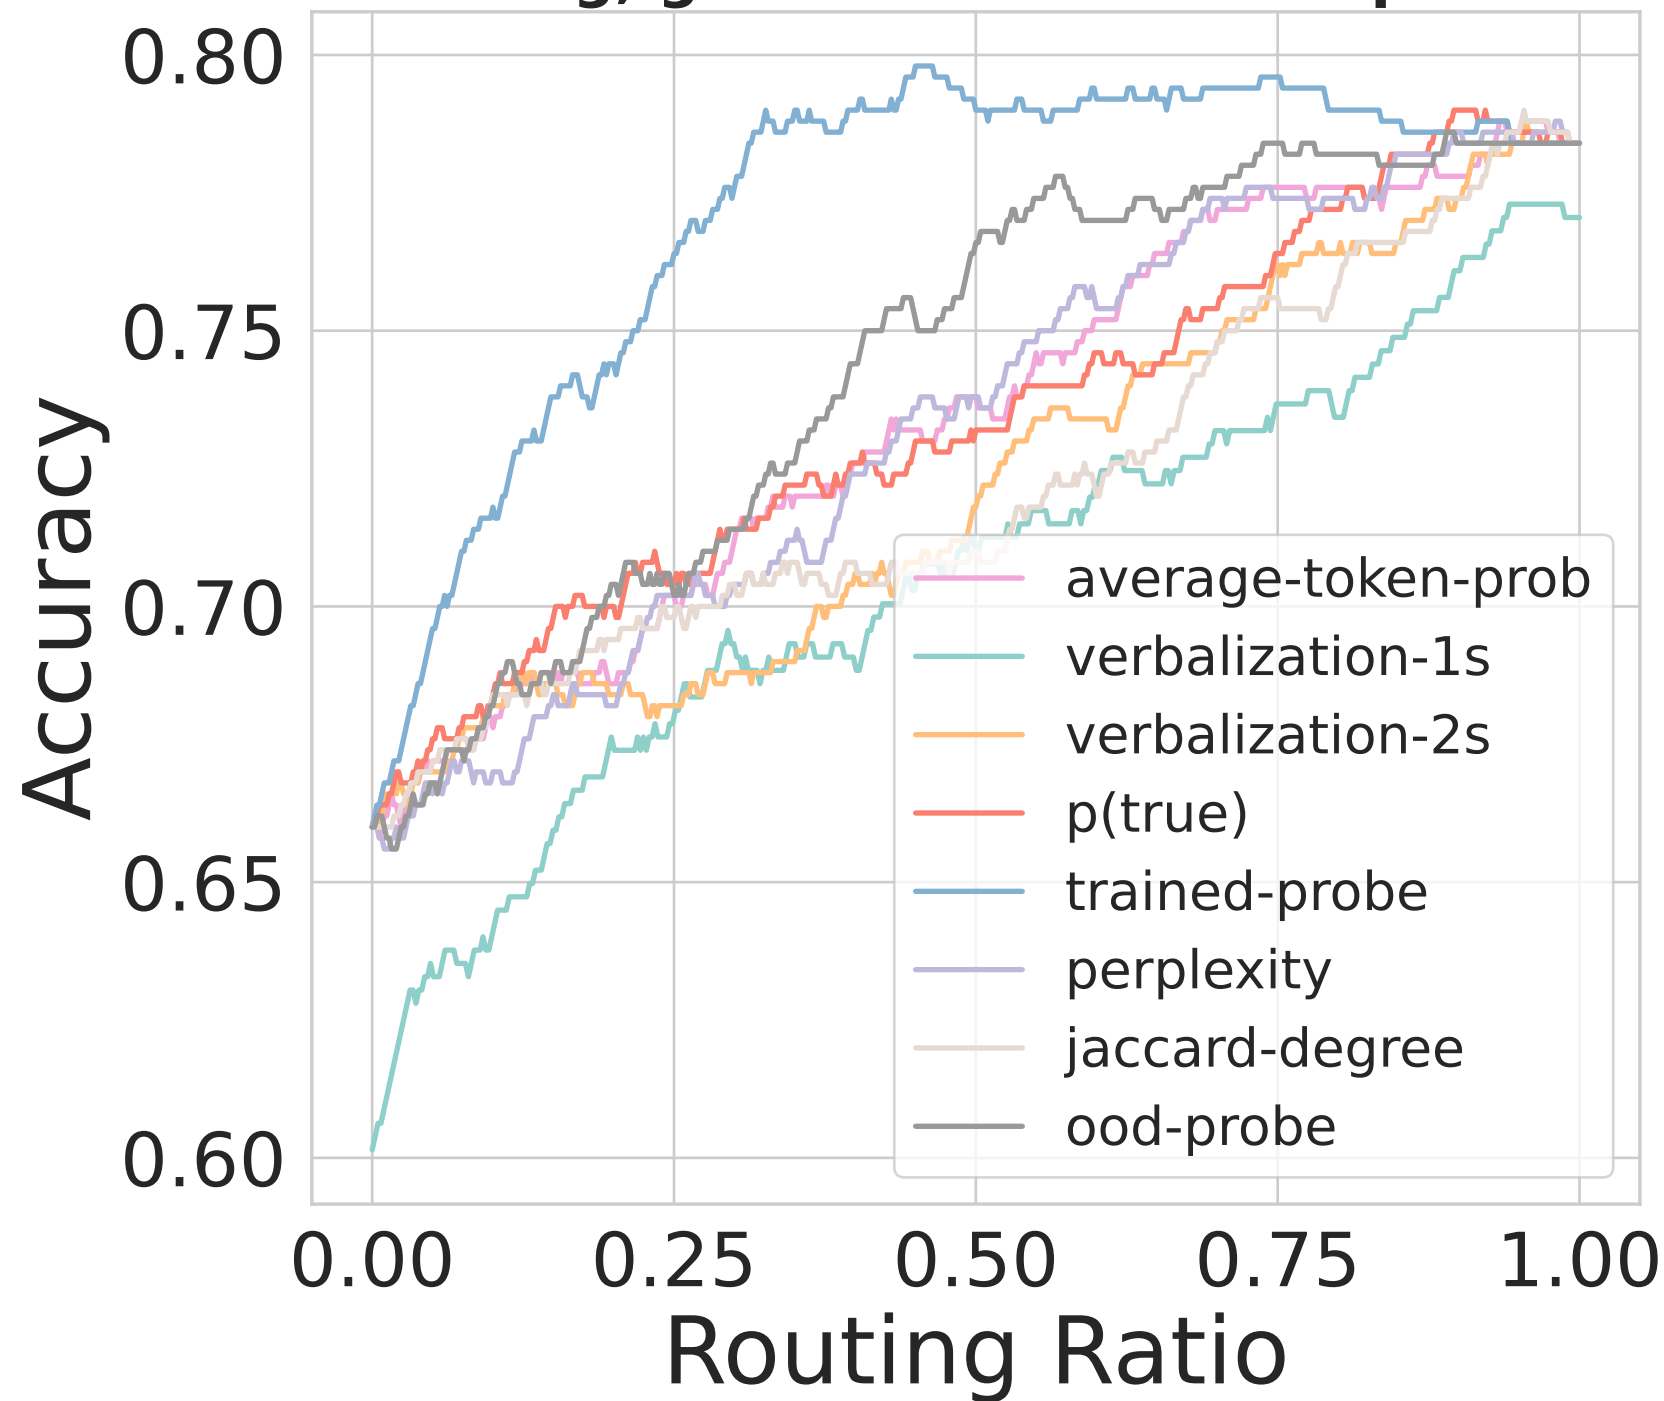

Supplement: supplementary_material [file rr_acc_hellaswag_granite-3.1-8b_dsR1.pdf › Routing_SLM_LLMs/Uncertainty-based Routing/w_legend/to_dsR1/rr_acc_hellaswag_granite-3.1-8b_dsR1.pdf]

# HellaSwag, llama-3.1-8b to DeepSeek-R1

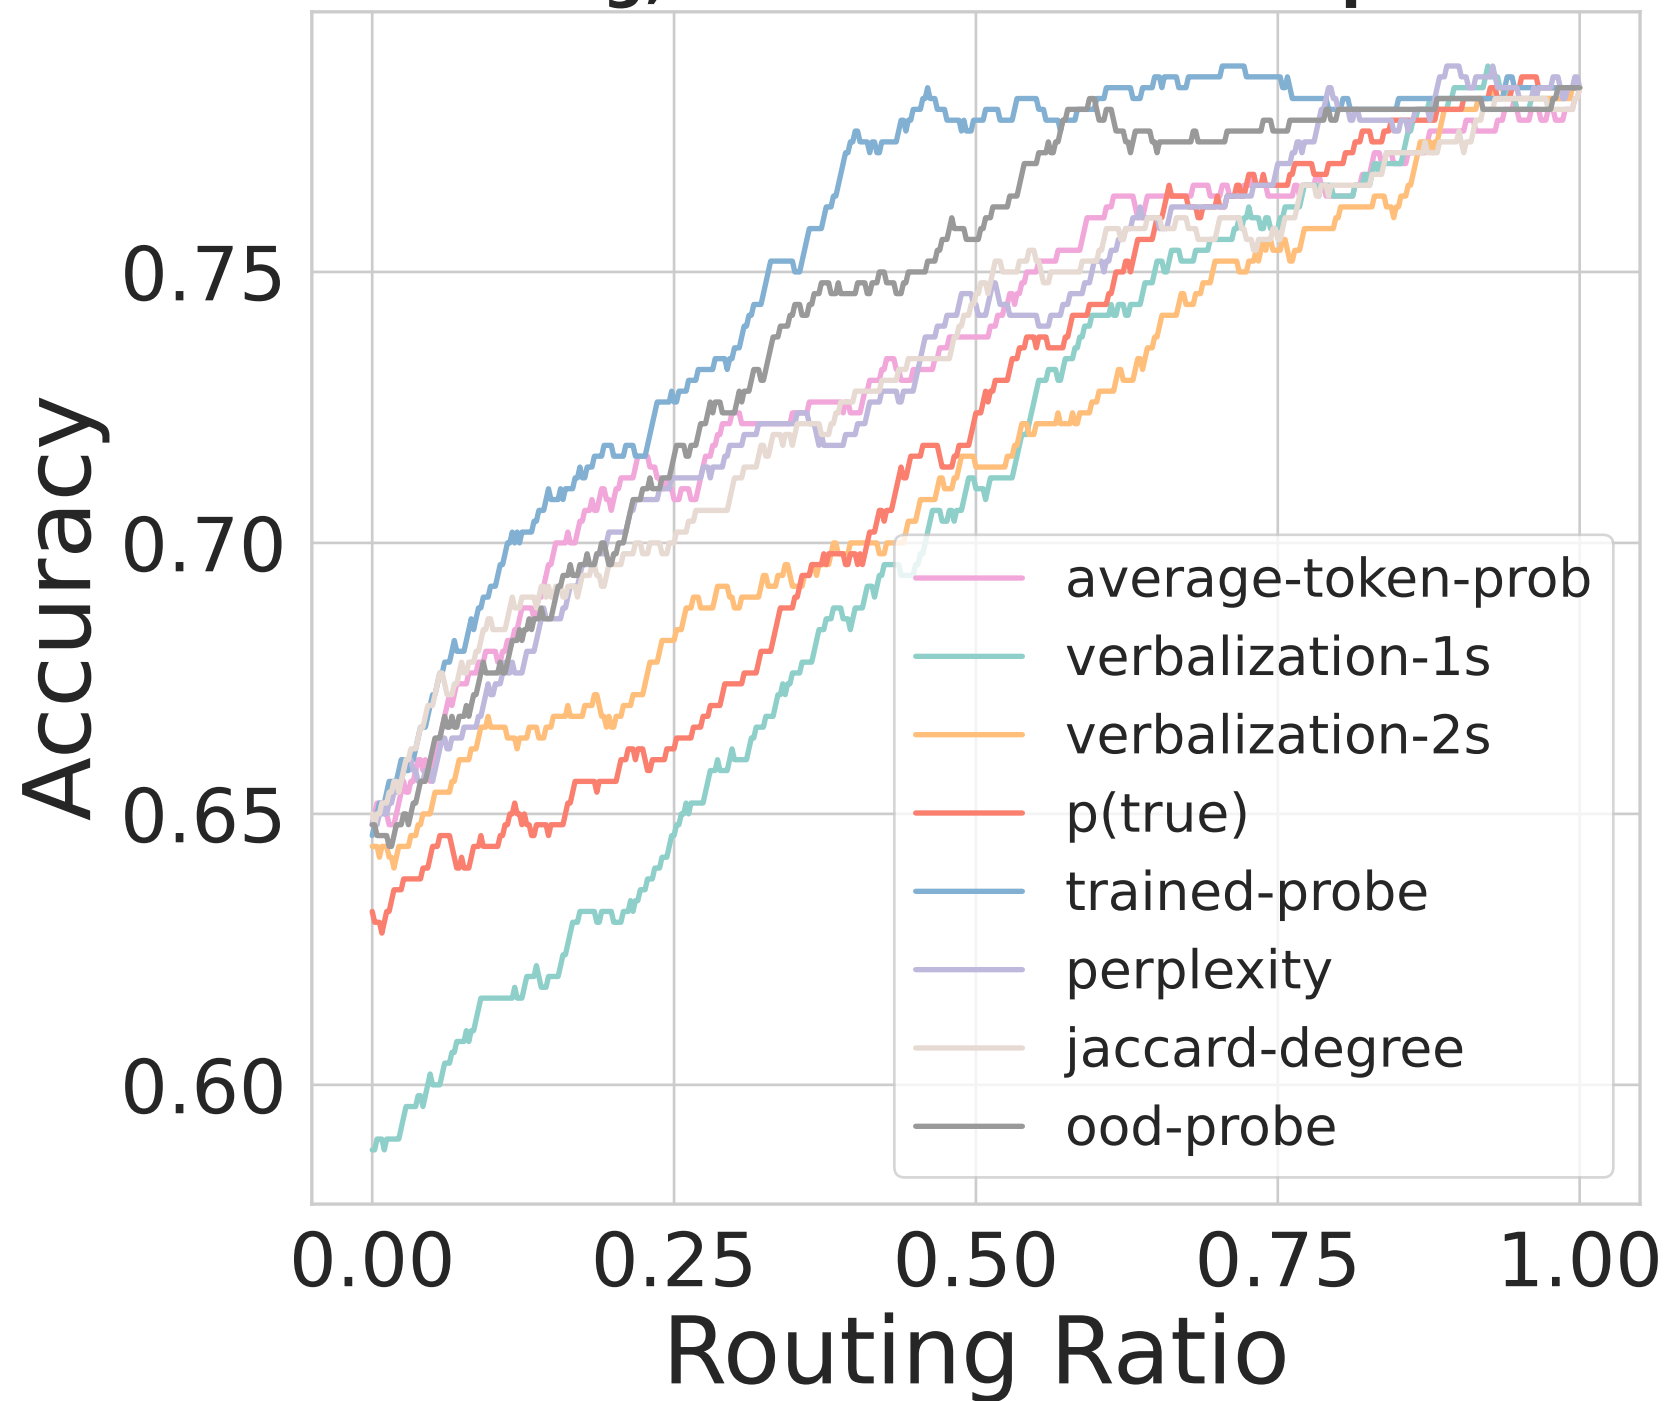

Supplement: supplementary_material [file rr_acc_hellaswag_llama-3.1-8b_dsR1.pdf › Routing_SLM_LLMs/Uncertainty-based Routing/w_legend/to_dsR1/rr_acc_hellaswag_llama-3.1-8b_dsR1.pdf]

# HellaSwag, llama-3.2-1b to DeepSeek-R1

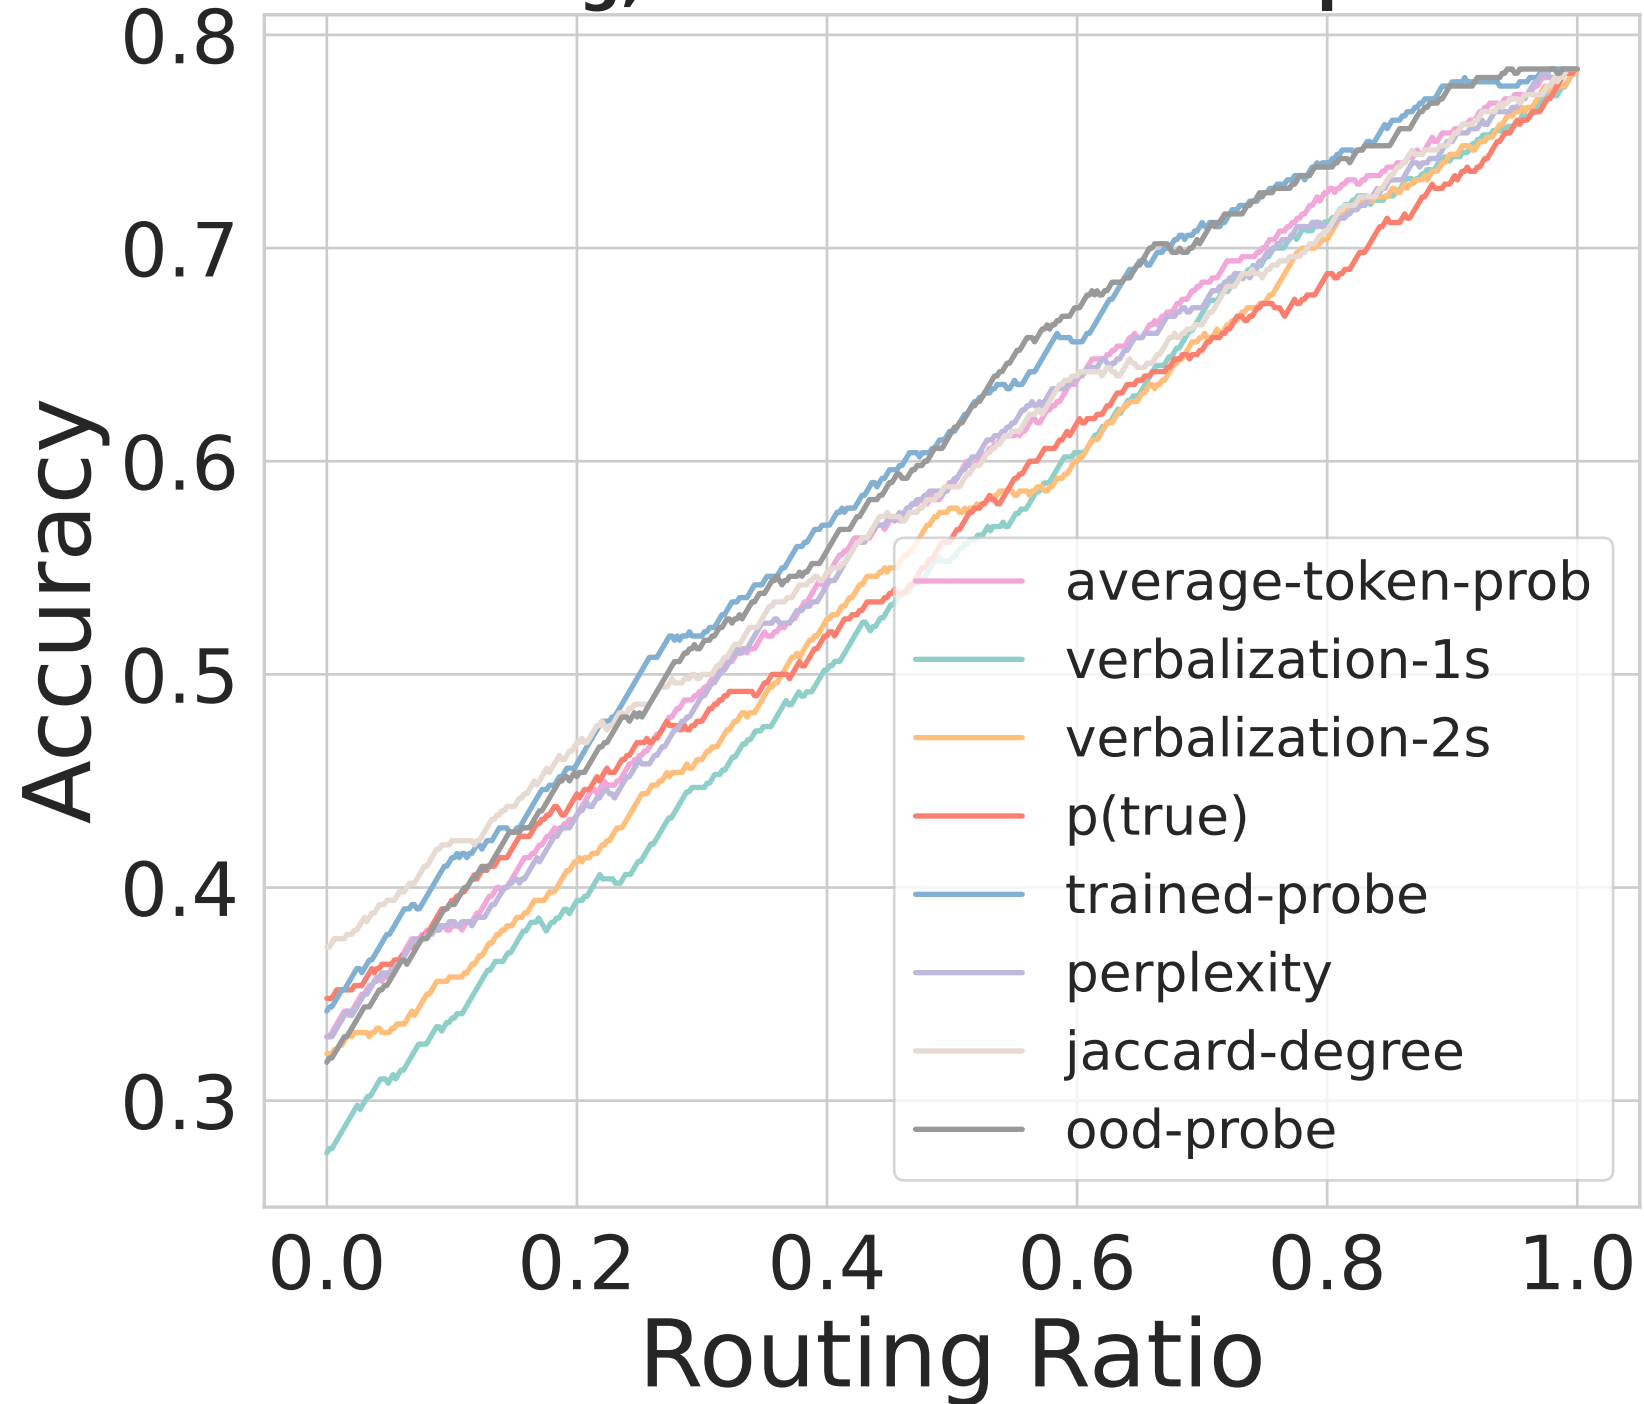

Supplement: supplementary_material [file rr_acc_hellaswag_llama-3.2-1b_dsR1.pdf › Routing_SLM_LLMs/Uncertainty-based Routing/w_legend/to_dsR1/rr_acc_hellaswag_llama-3.2-1b_dsR1.pdf]

**HellaSwag, llama-3.2-3b to DeepSeek-R1**

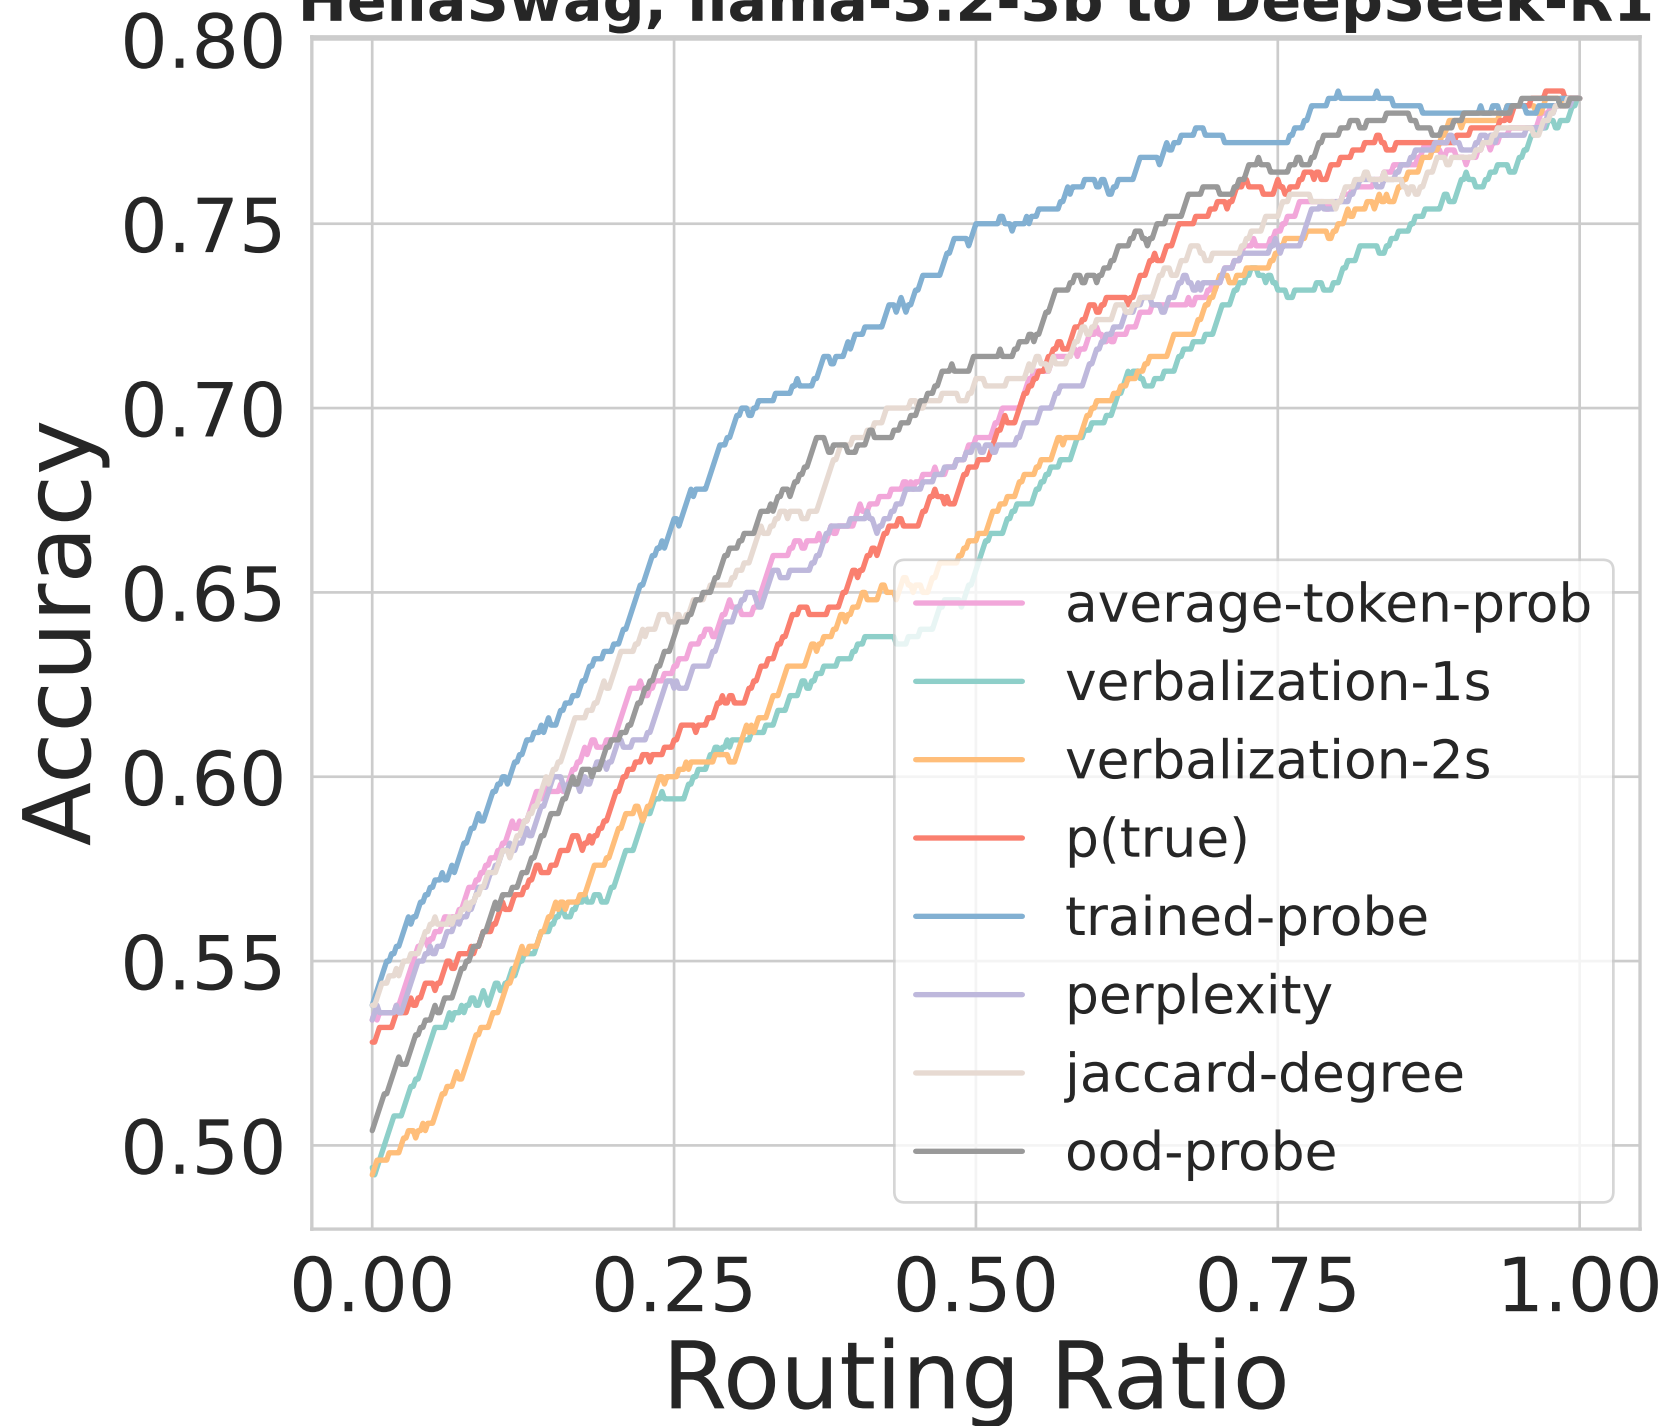

Supplement: supplementary_material [file rr_acc_hellaswag_llama-3.2-3b_dsR1.pdf › Routing_SLM_LLMs/Uncertainty-based Routing/w_legend/to_dsR1/rr_acc_hellaswag_llama-3.2-3b_dsR1.pdf]

**HellaSwag, mistral-7b to DeepSeek-R1**

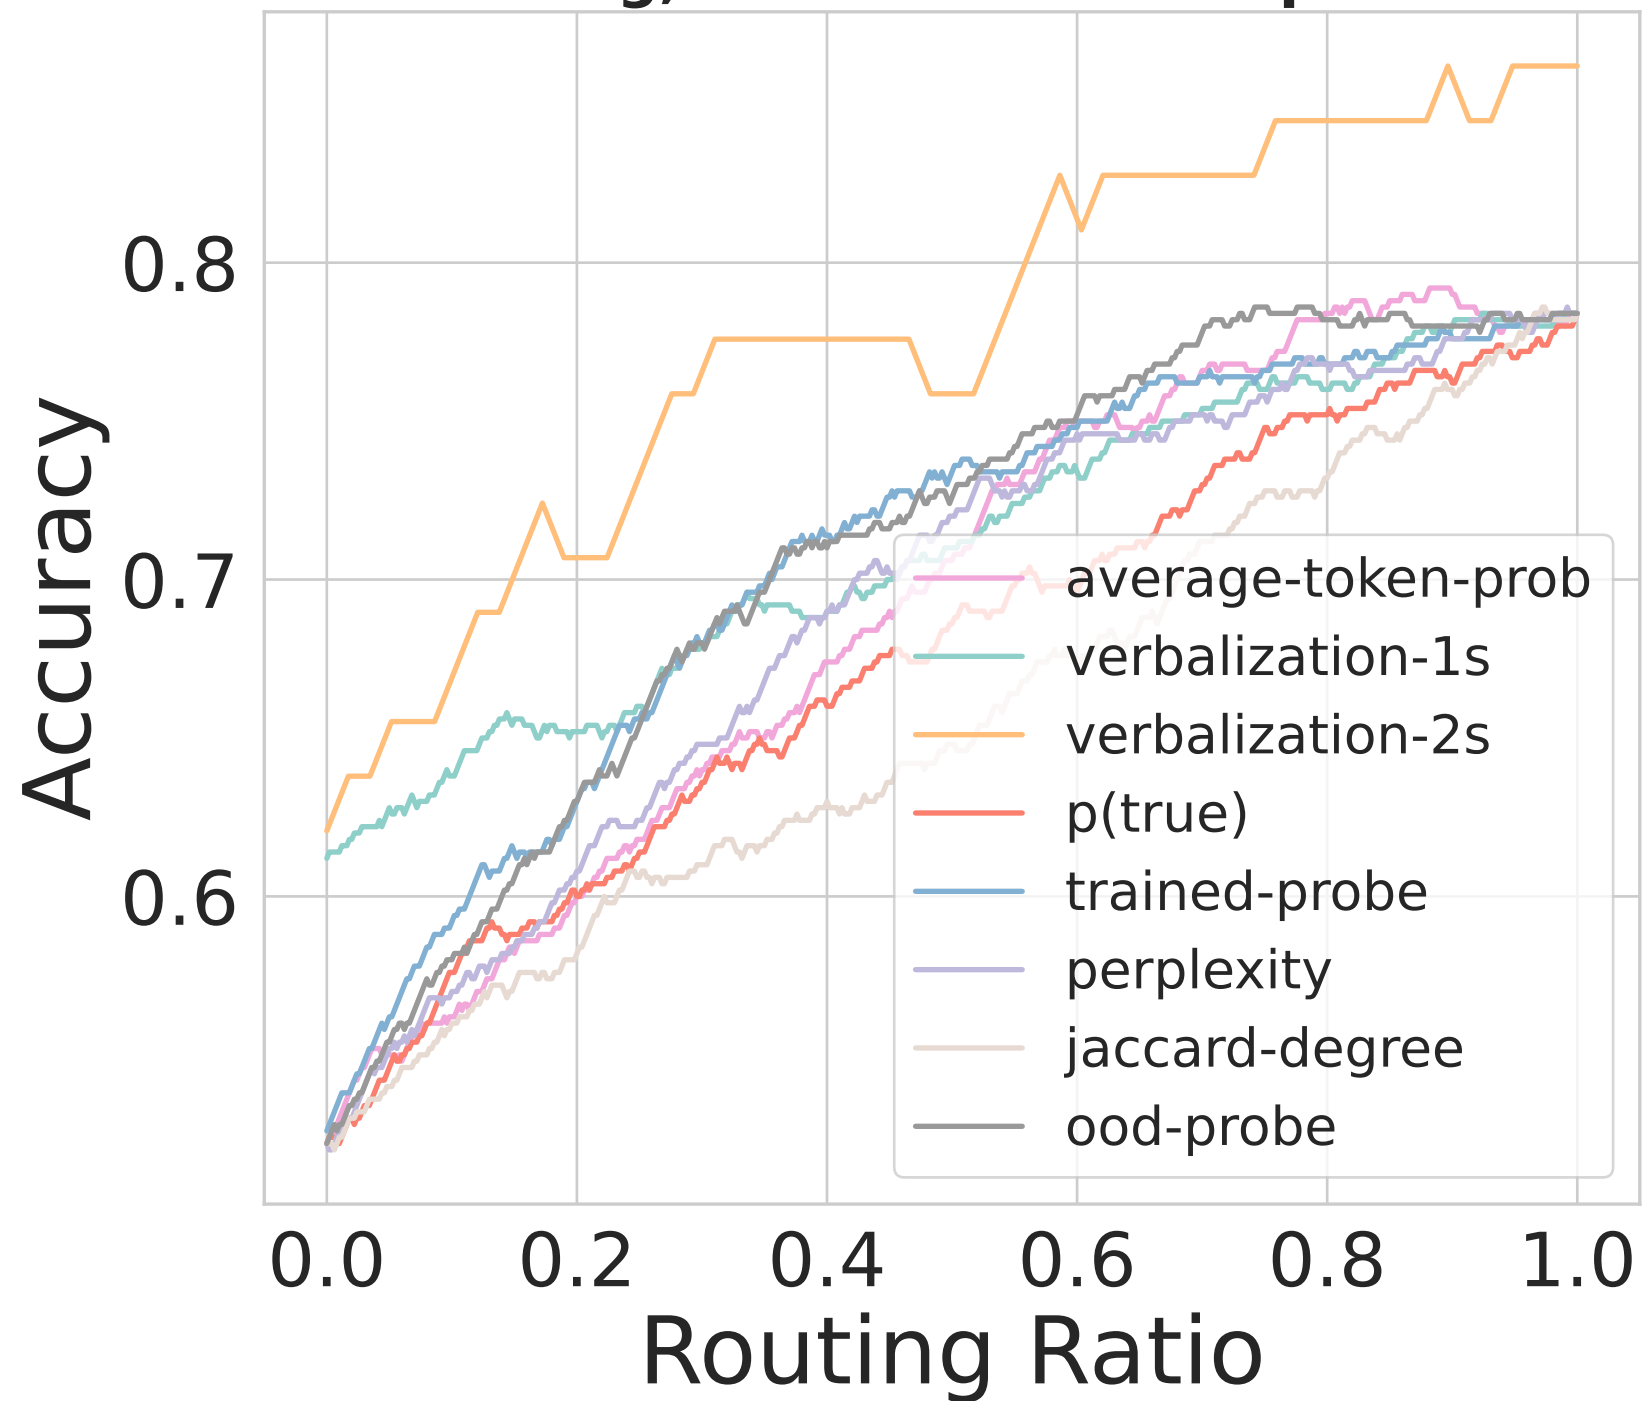

Supplement: supplementary_material [file rr_acc_hellaswag_mistral-7b_dsR1.pdf › Routing_SLM_LLMs/Uncertainty-based Routing/w_legend/to_dsR1/rr_acc_hellaswag_mistral-7b_dsR1.pdf]

# HellaSwag, qwen-2.5-7b to DeepSeek-R1

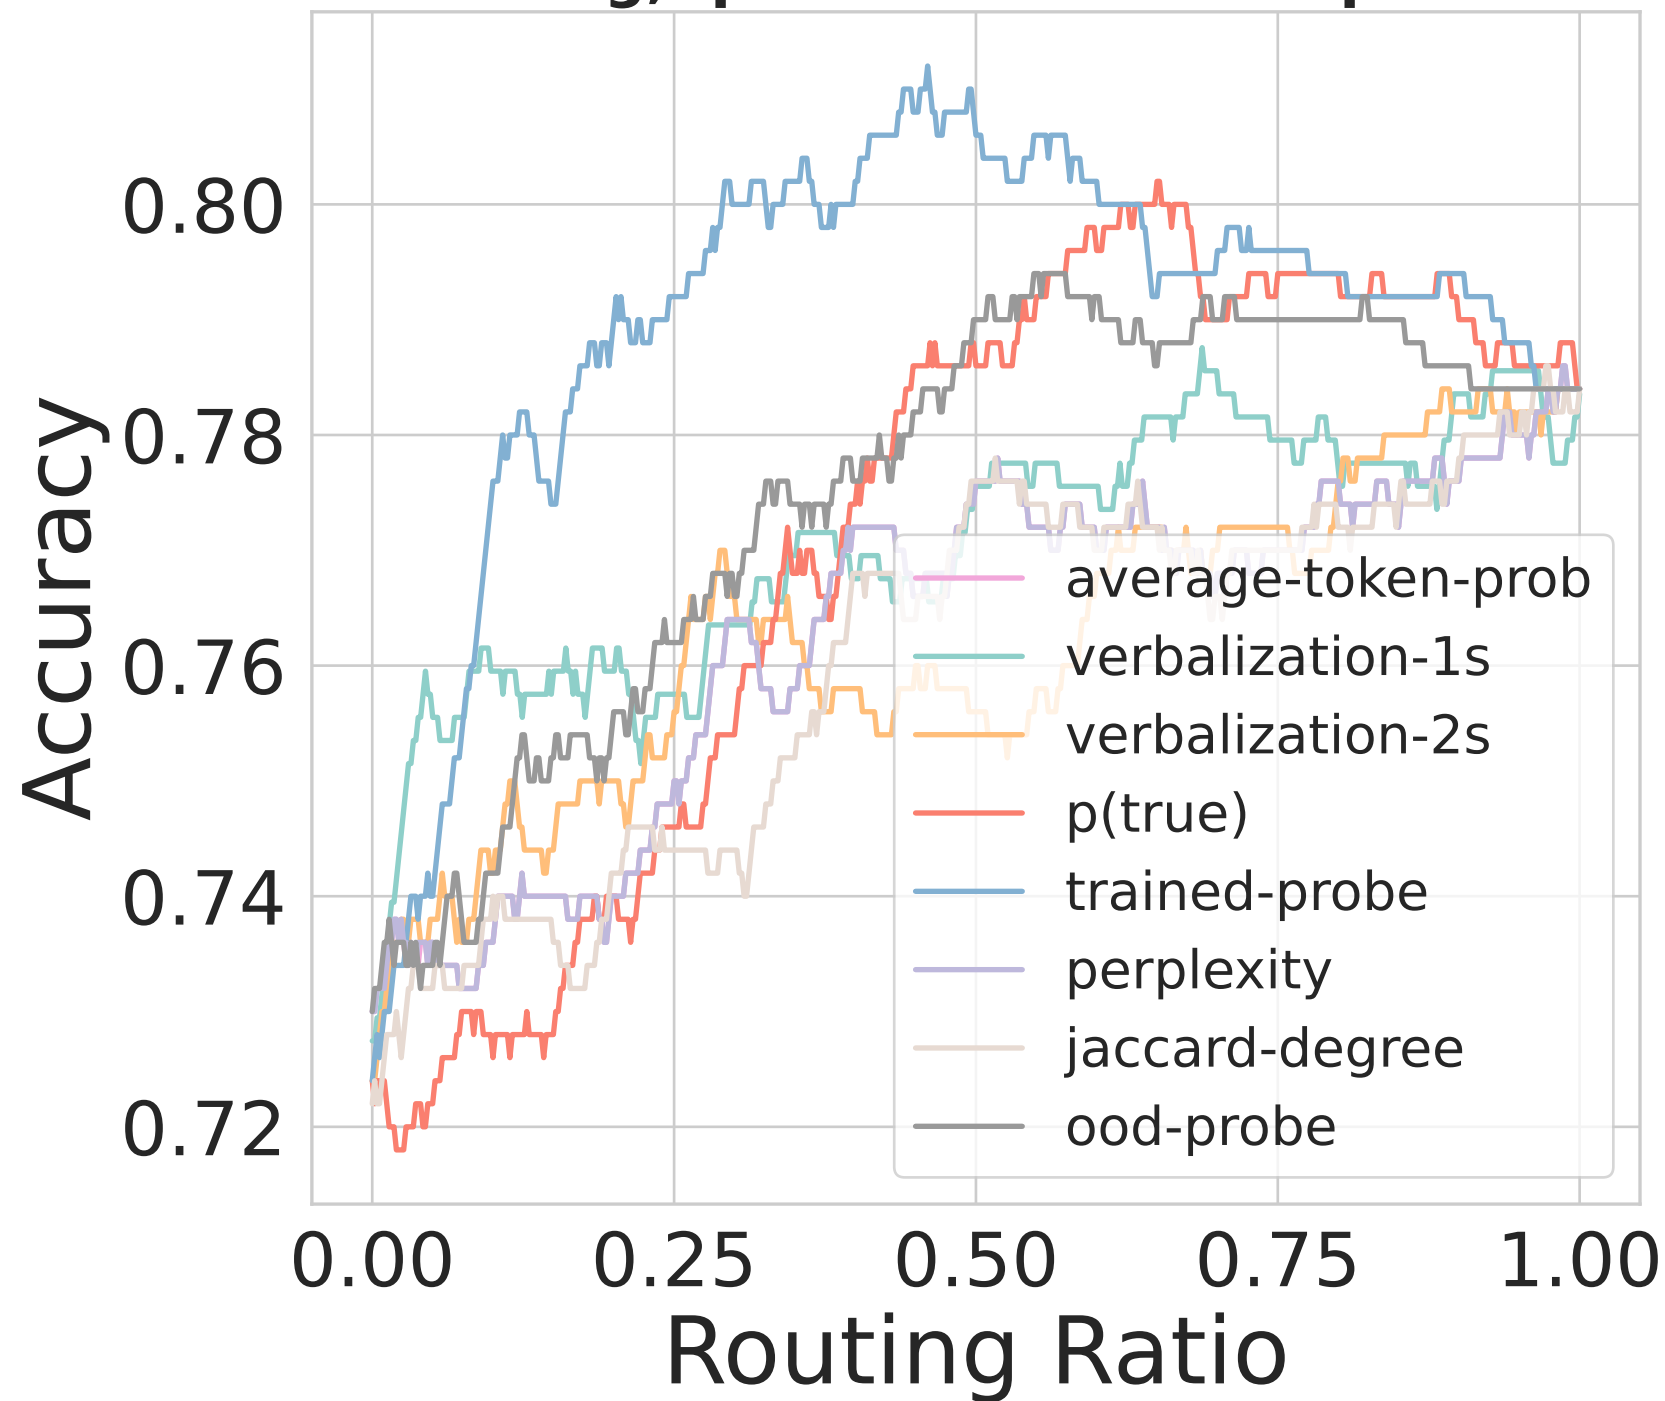

Supplement: supplementary_material [file rr_acc_hellaswag_qwen-2.5-7b_dsR1.pdf › Routing_SLM_LLMs/Uncertainty-based Routing/w_legend/to_dsR1/rr_acc_hellaswag_qwen-2.5-7b_dsR1.pdf]

# HellaSwag, rwkv to DeepSeek-R1

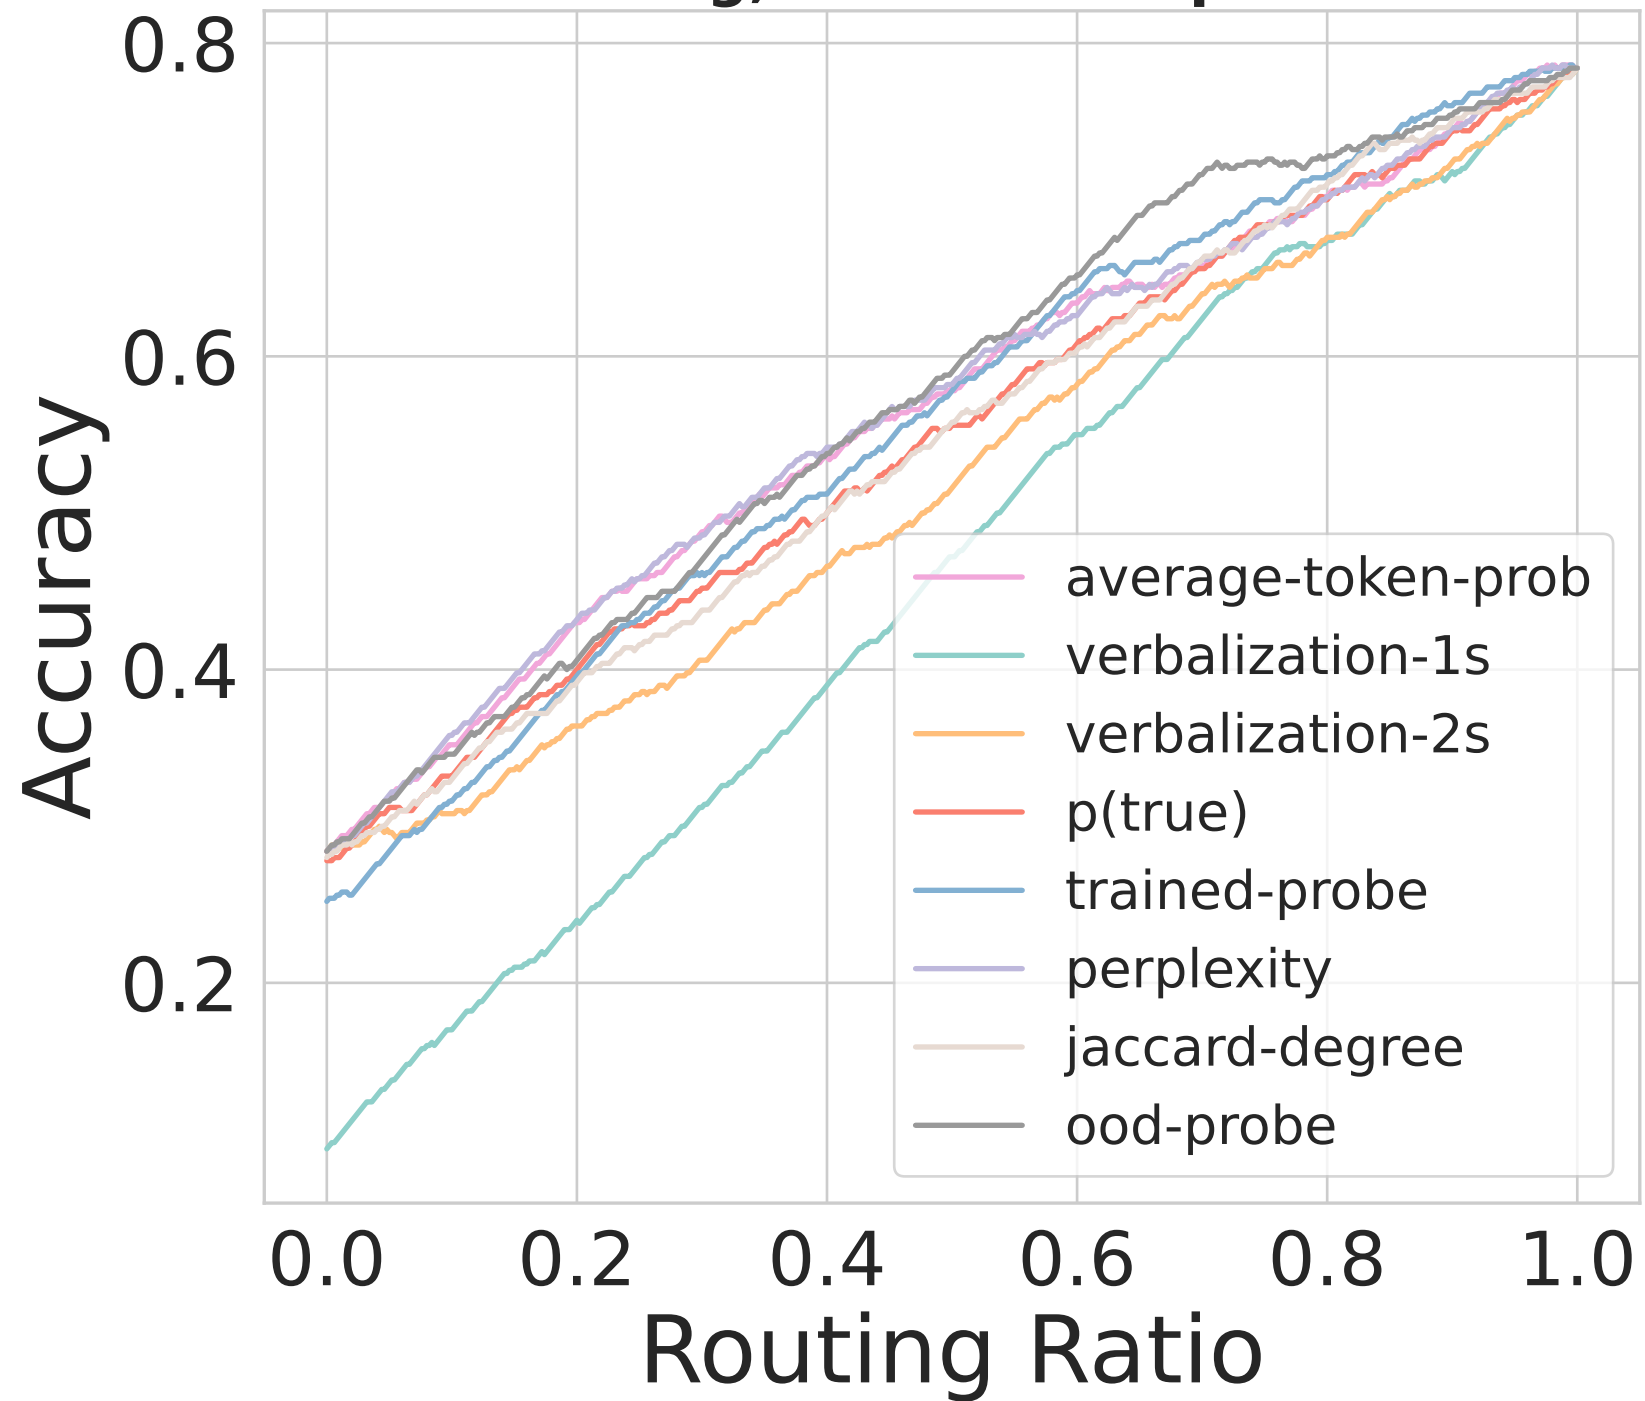

Supplement: supplementary_material [file rr_acc_hellaswag_rwkv_dsR1.pdf › Routing_SLM_LLMs/Uncertainty-based Routing/w_legend/to_dsR1/rr_acc_hellaswag_rwkv_dsR1.pdf]

# MATH-500, Qwen3-0.6B to DeepSeek-R1

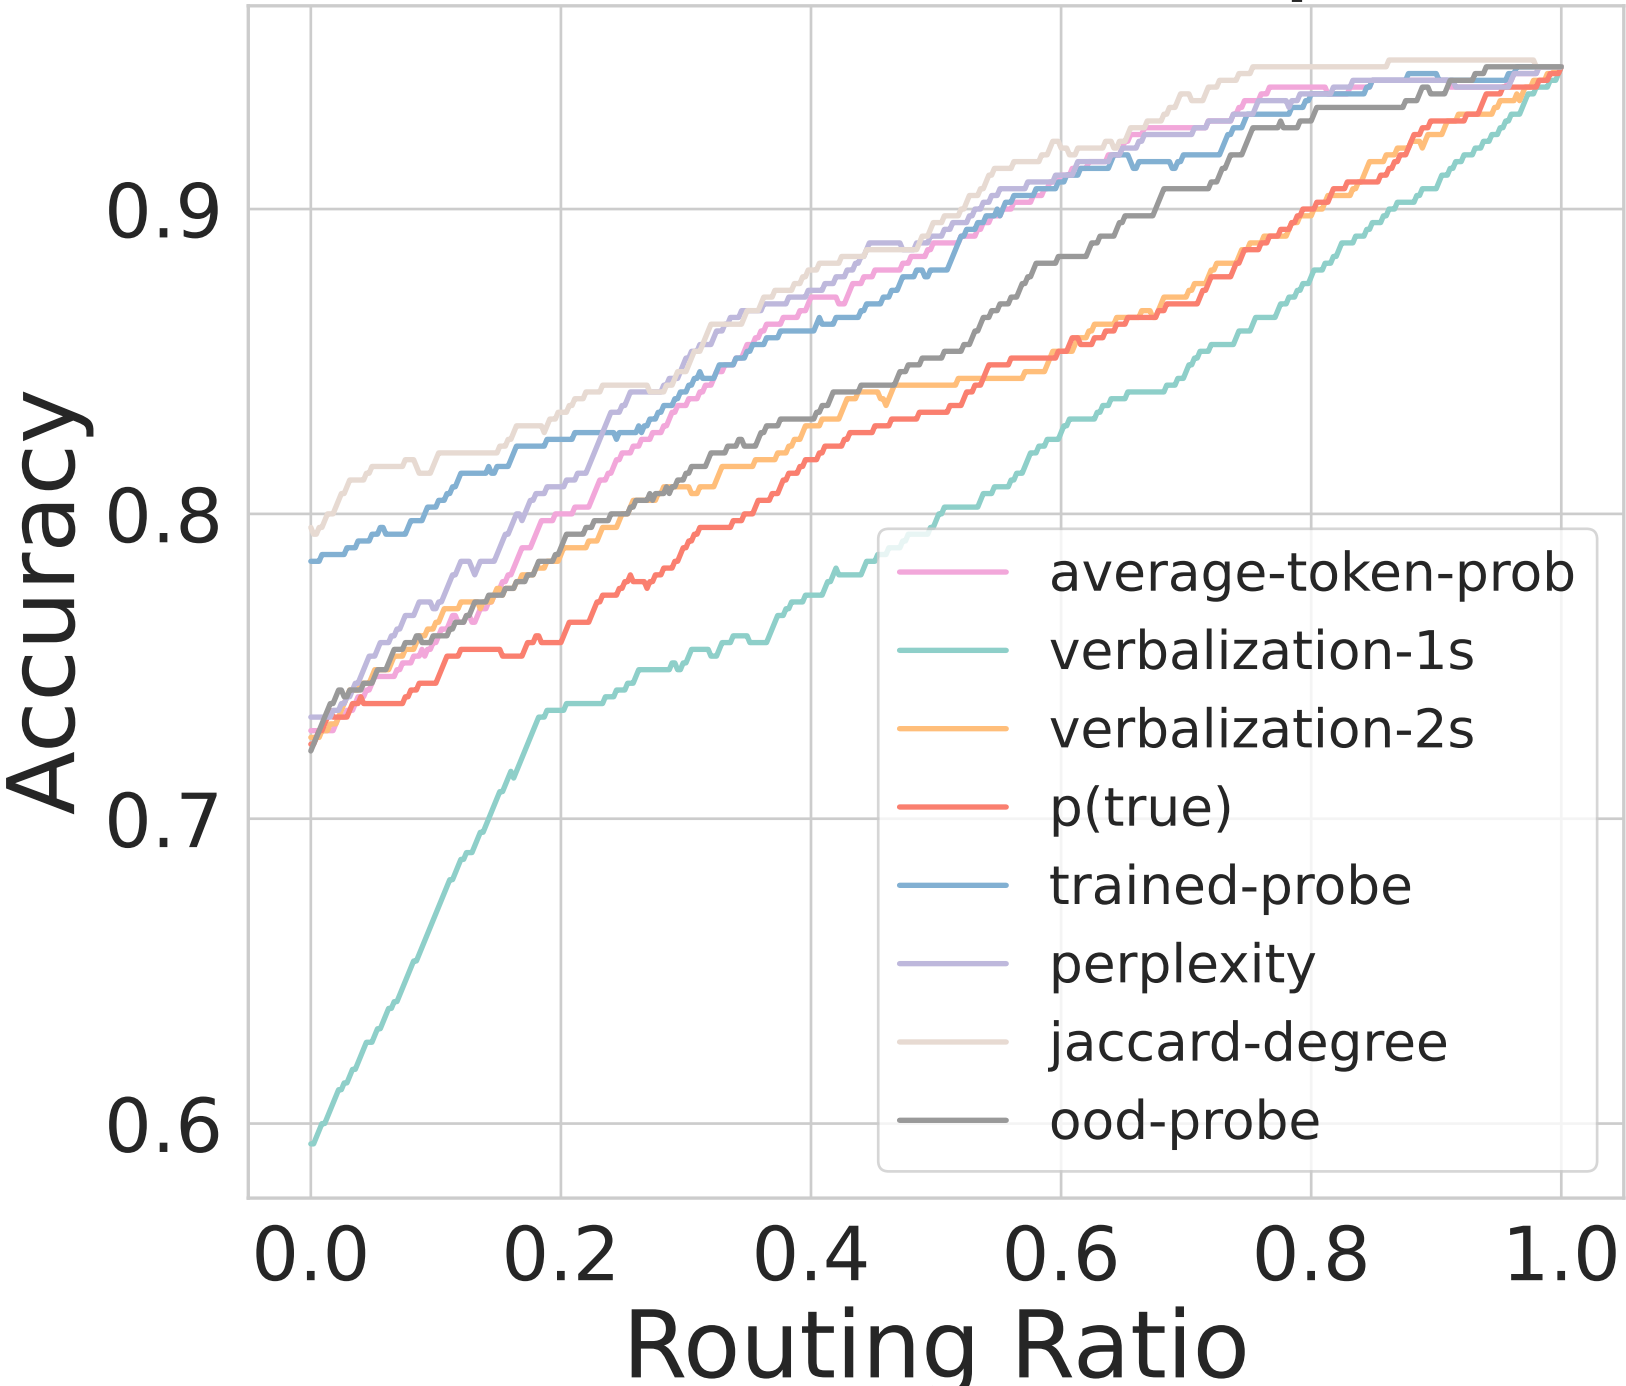

Supplement: supplementary_material [file rr_acc_math_500_Qwen3-0.6B_dsR1.pdf › Routing_SLM_LLMs/Uncertainty-based Routing/w_legend/to_dsR1/rr_acc_math_500_Qwen3-0.6B_dsR1.pdf]

# MATH-500, Qwen3-1.7B to DeepSeek-R1

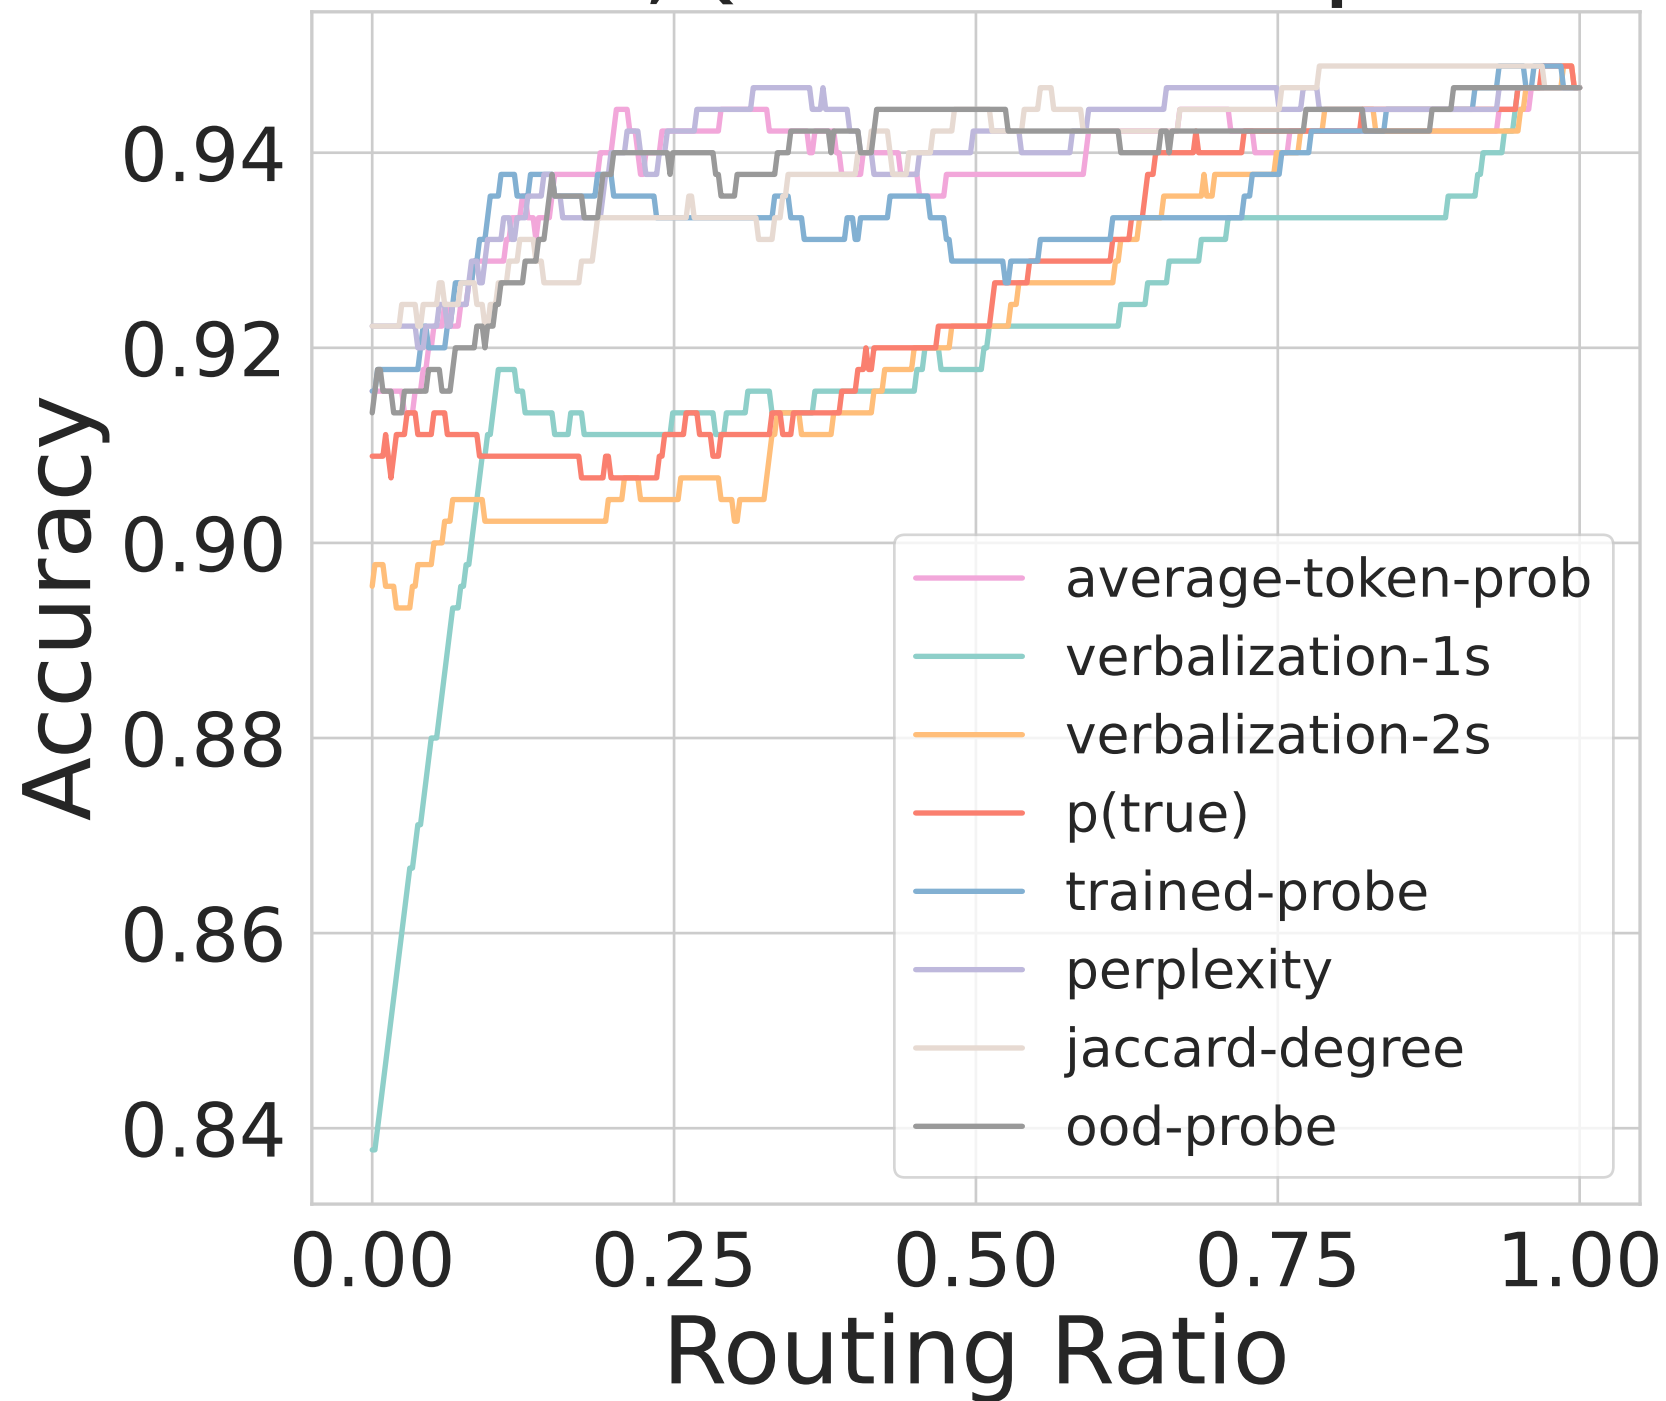

Supplement: supplementary_material [file rr_acc_math_500_Qwen3-1.7B_dsR1.pdf › Routing_SLM_LLMs/Uncertainty-based Routing/w_legend/to_dsR1/rr_acc_math_500_Qwen3-1.7B_dsR1.pdf]

**MATH-500, Qwen3-4B to DeepSeek-R1**

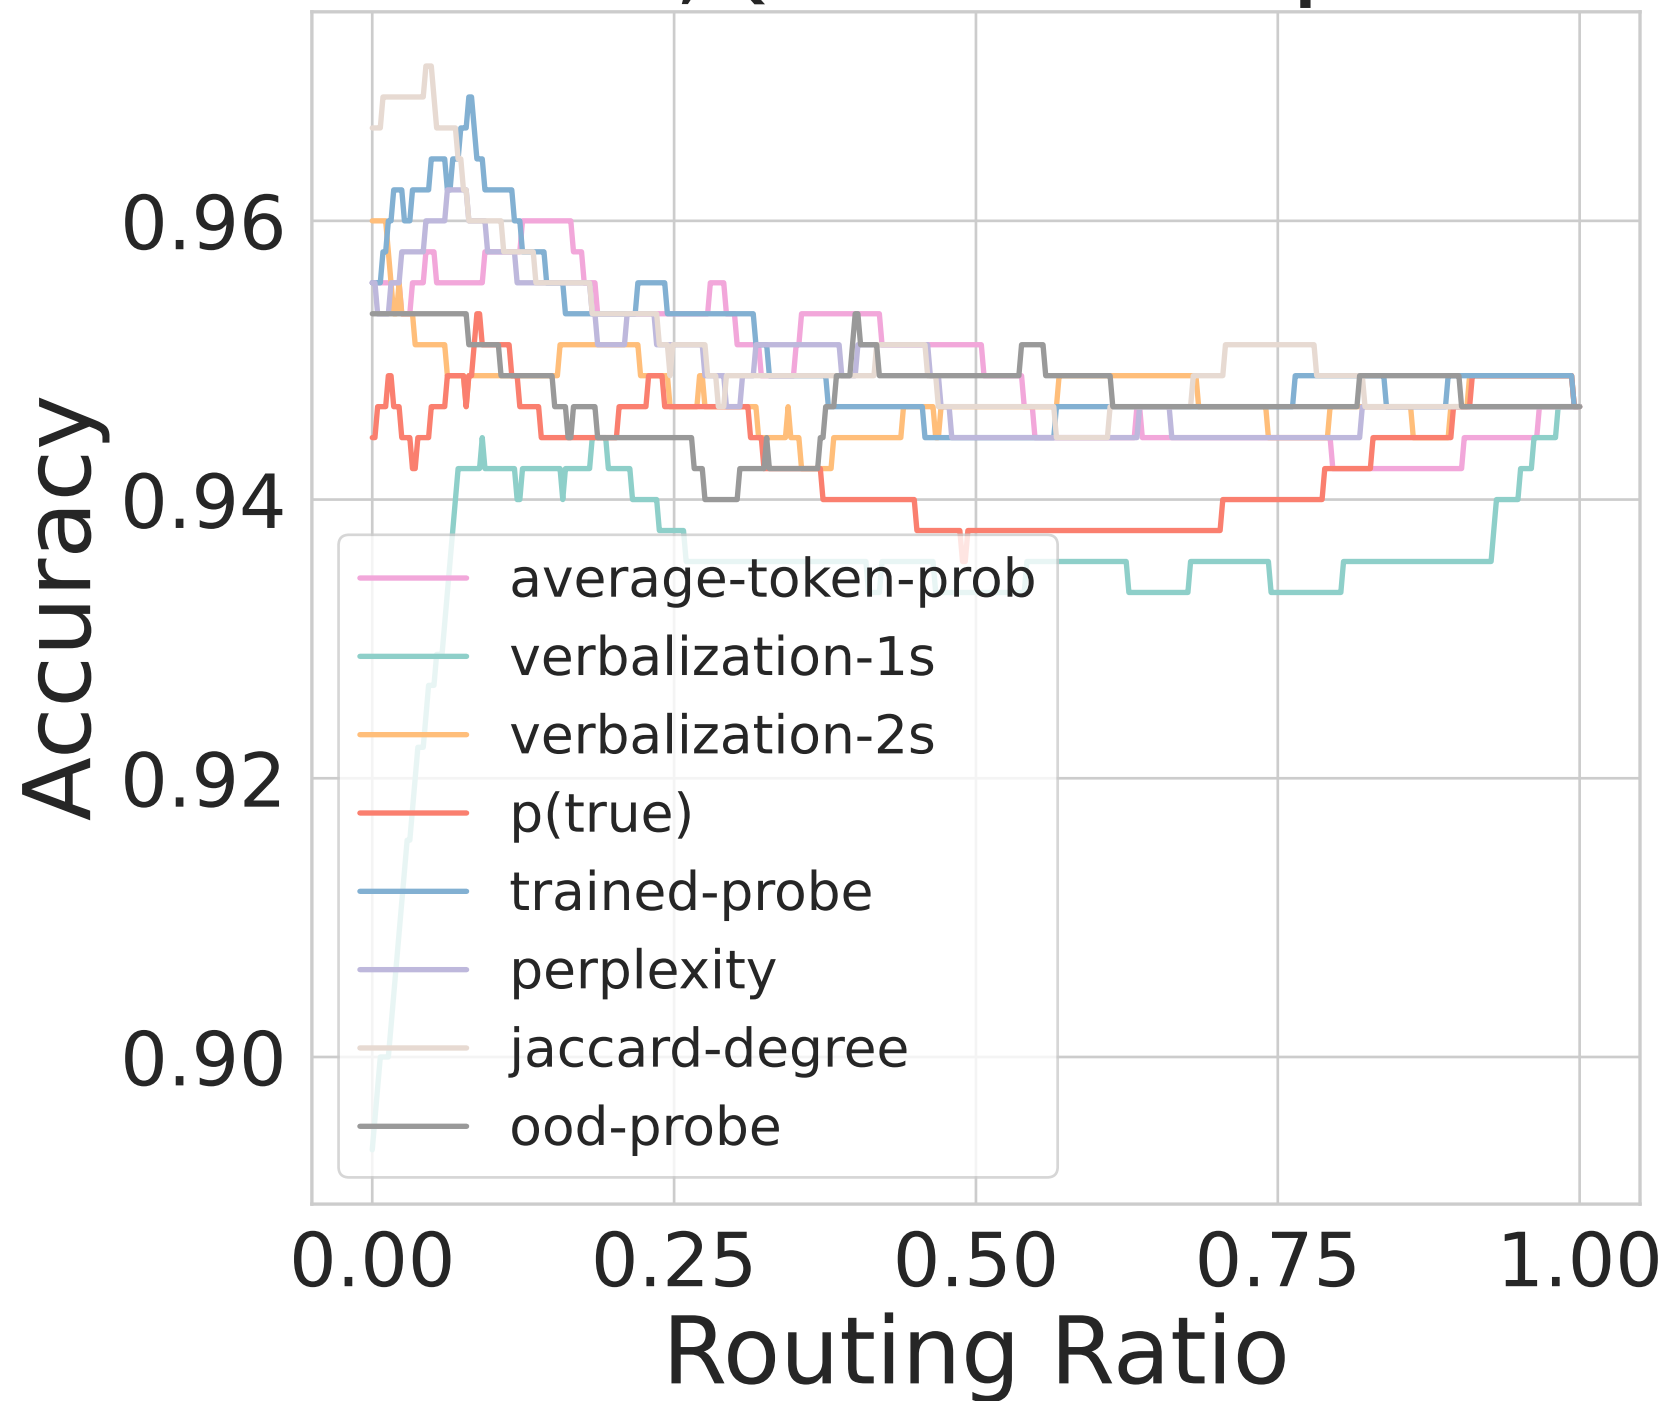

Supplement: supplementary_material [file rr_acc_math_500_Qwen3-4B_dsR1.pdf › Routing_SLM_LLMs/Uncertainty-based Routing/w_legend/to_dsR1/rr_acc_math_500_Qwen3-4B_dsR1.pdf]

# MATH-500, granite-3.1-8b to DeepSeek-R1

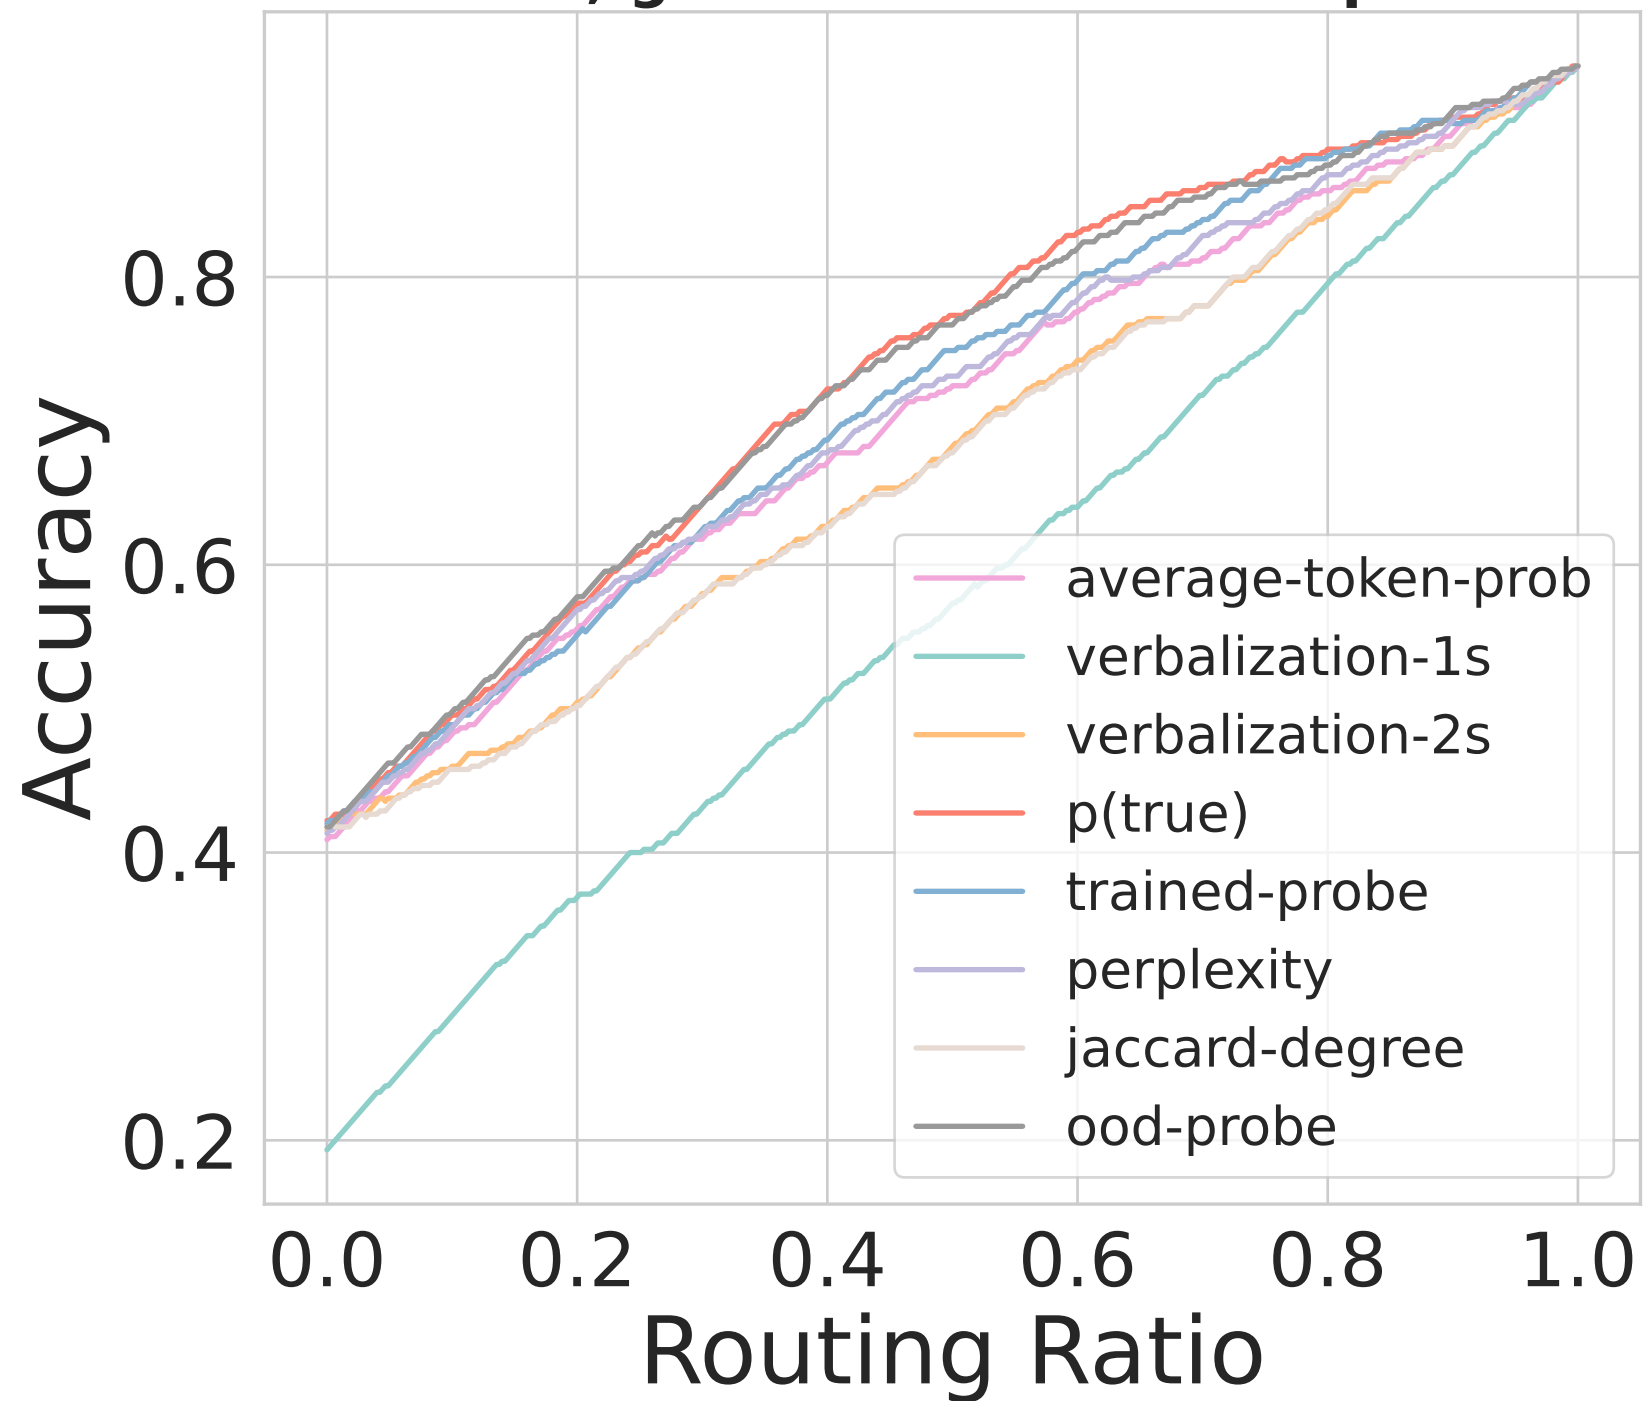

Supplement: supplementary_material [file rr_acc_math_500_granite-3.1-8b_dsR1.pdf › Routing_SLM_LLMs/Uncertainty-based Routing/w_legend/to_dsR1/rr_acc_math_500_granite-3.1-8b_dsR1.pdf]

# MATH-500, llama-3.2-1b to DeepSeek-R1

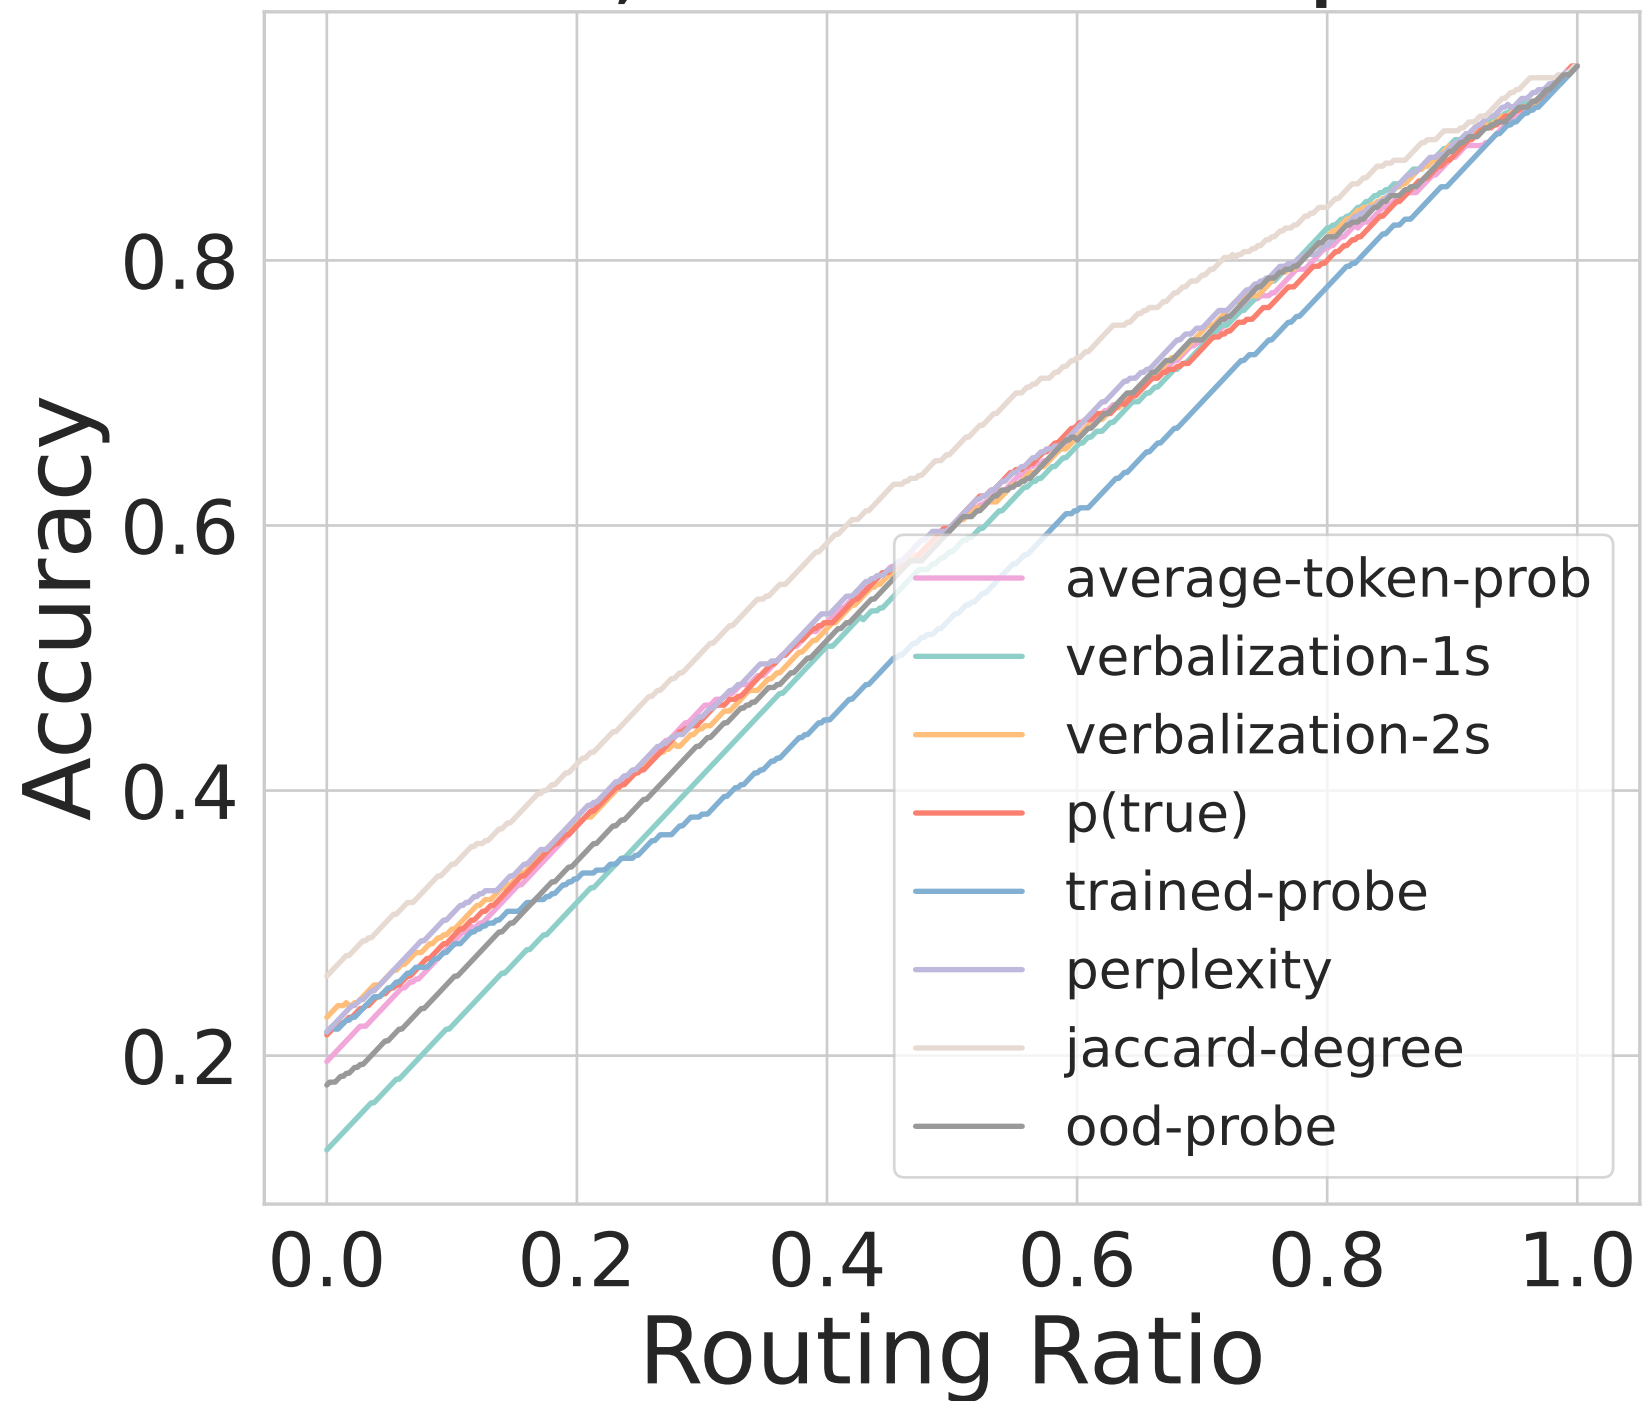

Supplement: supplementary_material [file rr_acc_math_500_llama-3.2-1b_dsR1.pdf › Routing_SLM_LLMs/Uncertainty-based Routing/w_legend/to_dsR1/rr_acc_math_500_llama-3.2-1b_dsR1.pdf]

# MATH-500, llama-3.2-3b to DeepSeek-R1

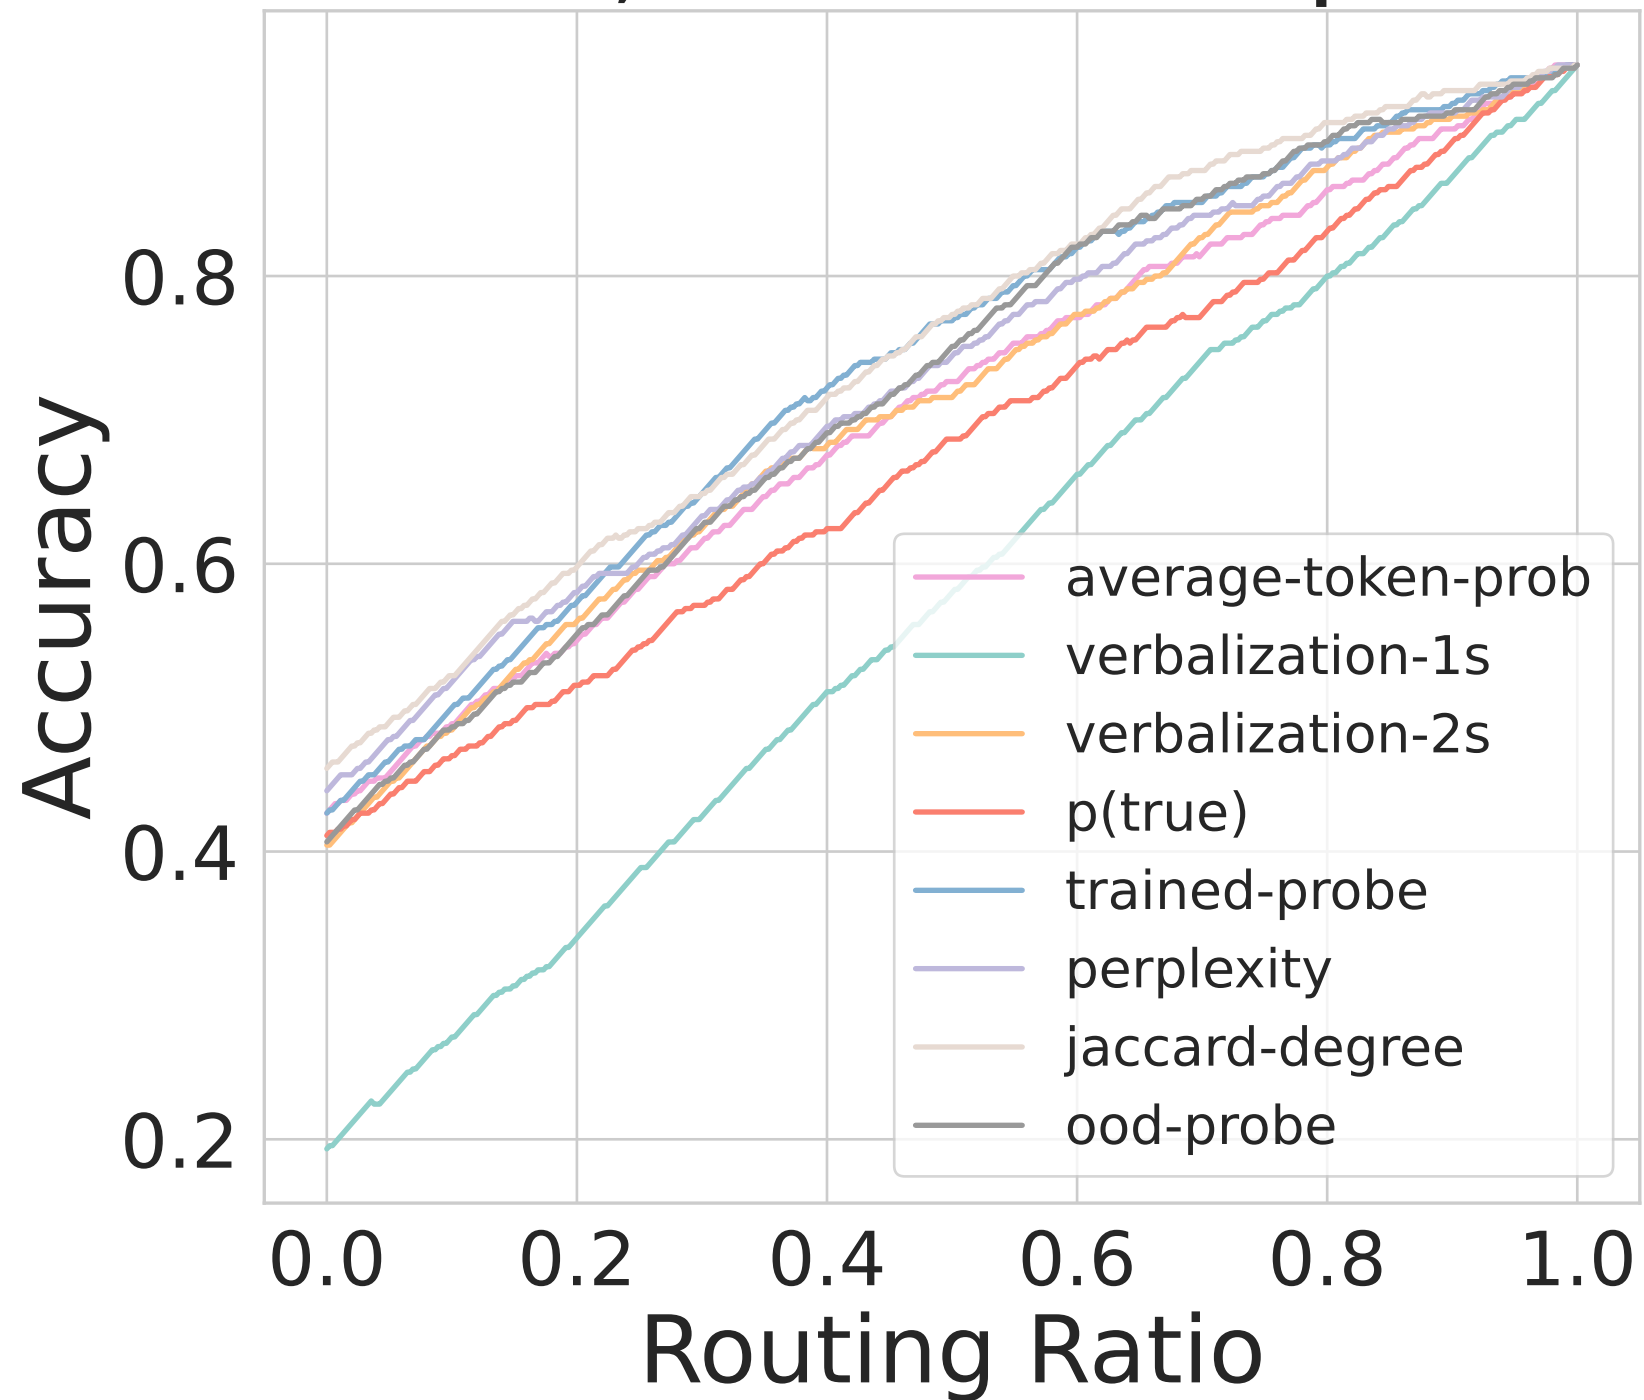

Supplement: supplementary_material [file rr_acc_math_500_llama-3.2-3b_dsR1.pdf › Routing_SLM_LLMs/Uncertainty-based Routing/w_legend/to_dsR1/rr_acc_math_500_llama-3.2-3b_dsR1.pdf]

# MATH-500, mistral-7b to DeepSeek-R1

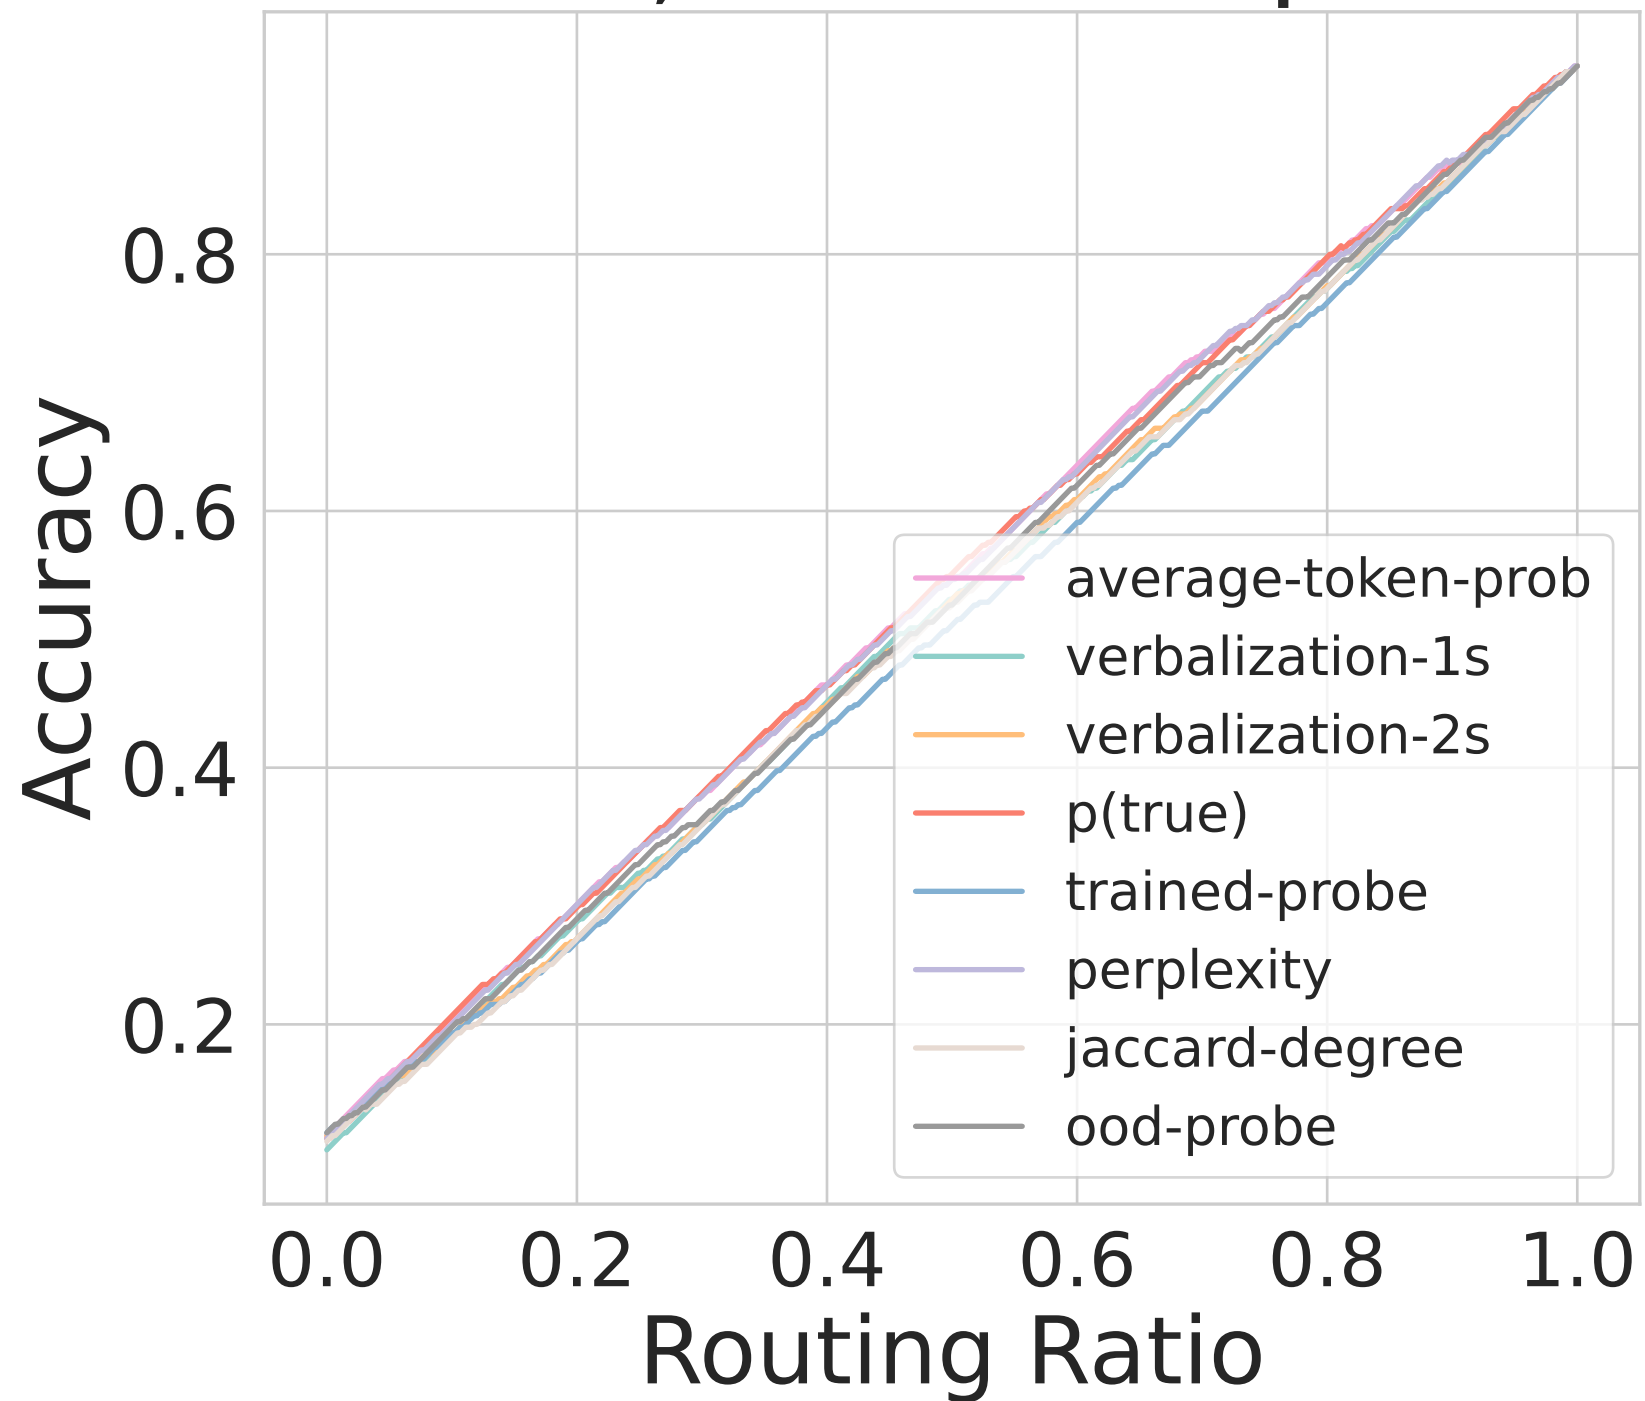

Supplement: supplementary_material [file rr_acc_math_500_mistral-7b_dsR1.pdf › Routing_SLM_LLMs/Uncertainty-based Routing/w_legend/to_dsR1/rr_acc_math_500_mistral-7b_dsR1.pdf]

# MATH-500, phi-3.5-mini to DeepSeek-R1

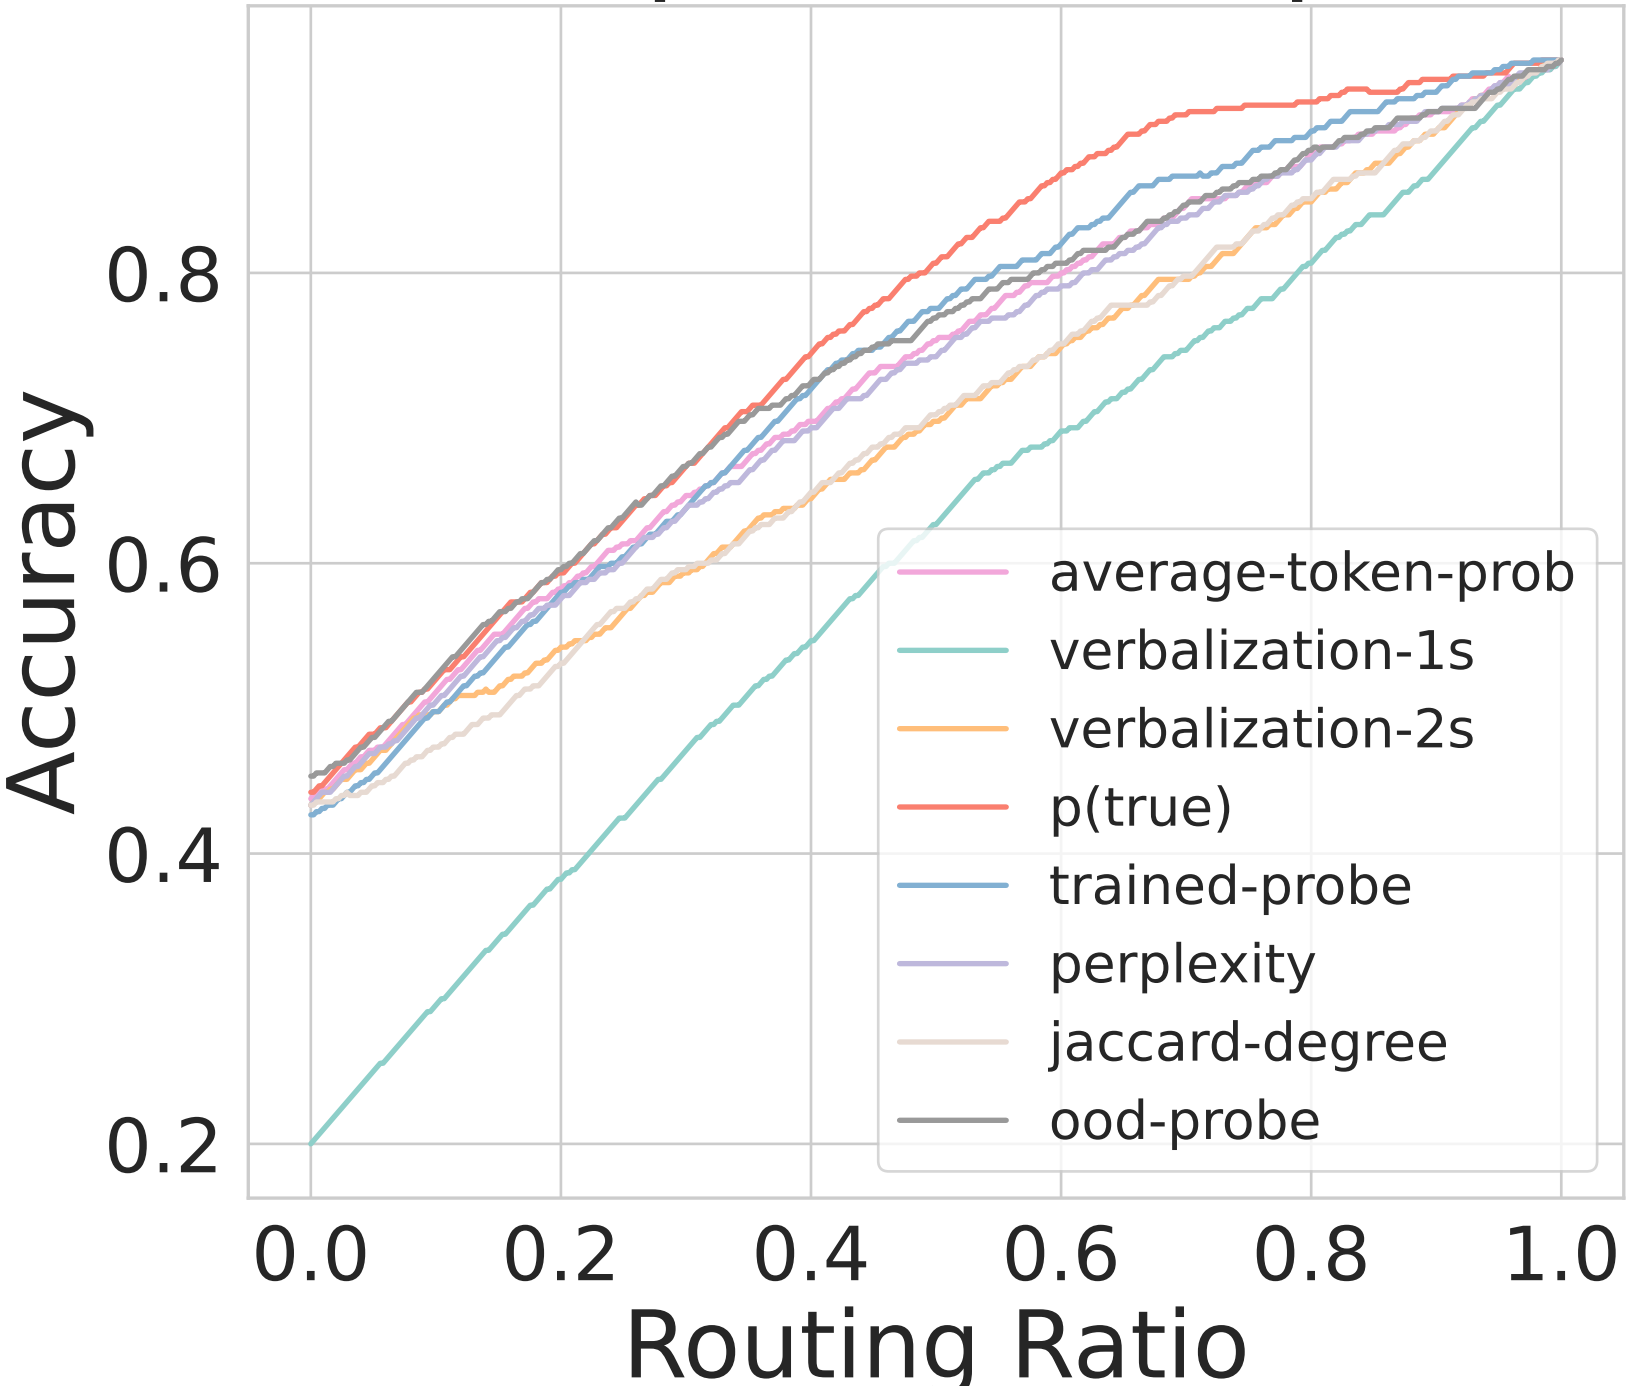

Supplement: supplementary_material [file rr_acc_math_500_phi-3.5-mini_dsR1.pdf › Routing_SLM_LLMs/Uncertainty-based Routing/w_legend/to_dsR1/rr_acc_math_500_phi-3.5-mini_dsR1.pdf]

# MATH-500, phi-4-mini-reasoning to DeepSeek-R1

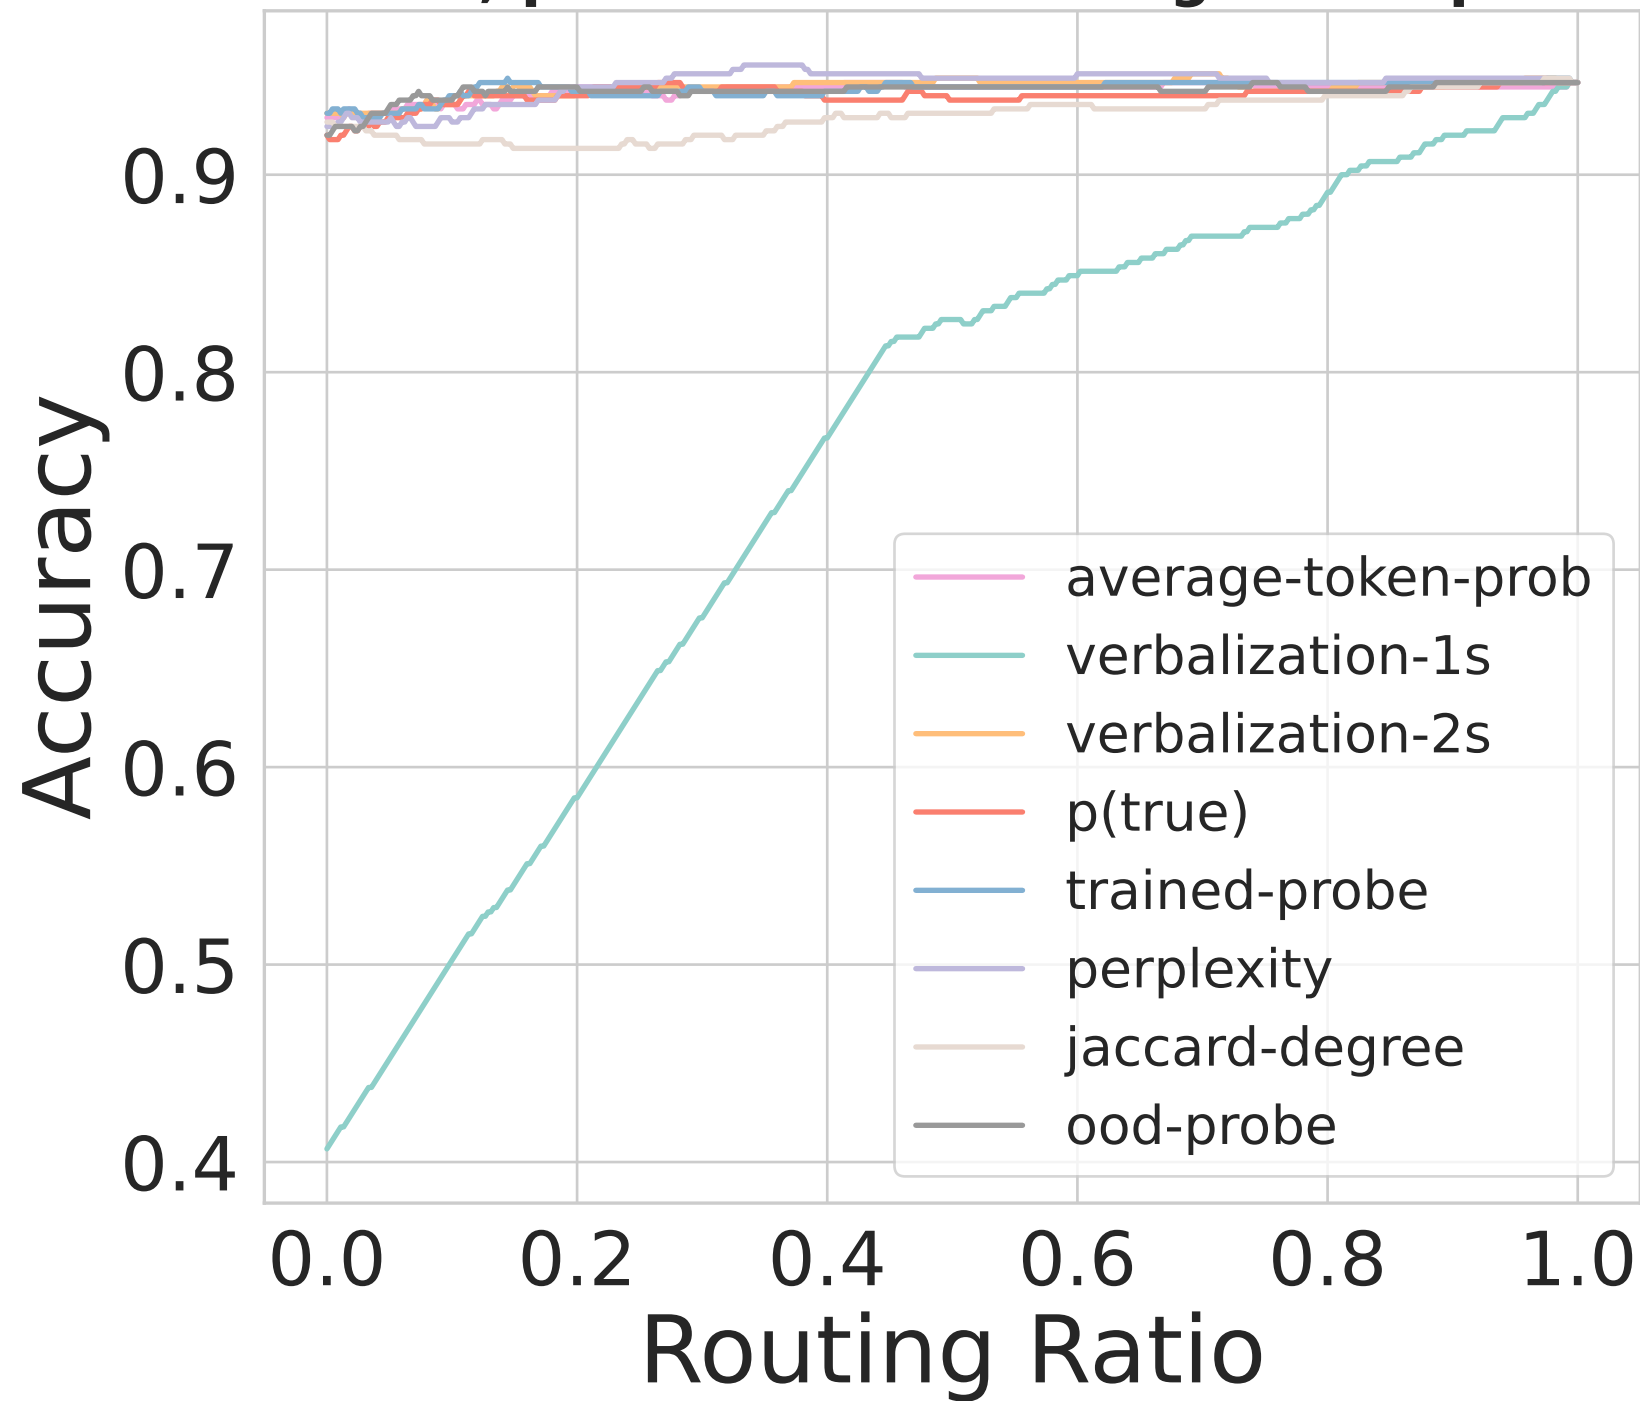

Supplement: supplementary_material [file rr_acc_math_500_phi-4-mini-reasoning_dsR1.pdf › Routing_SLM_LLMs/Uncertainty-based Routing/w_legend/to_dsR1/rr_acc_math_500_phi-4-mini-reasoning_dsR1.pdf]

# MATH-500, qwen-2.5-7b to DeepSeek-R1

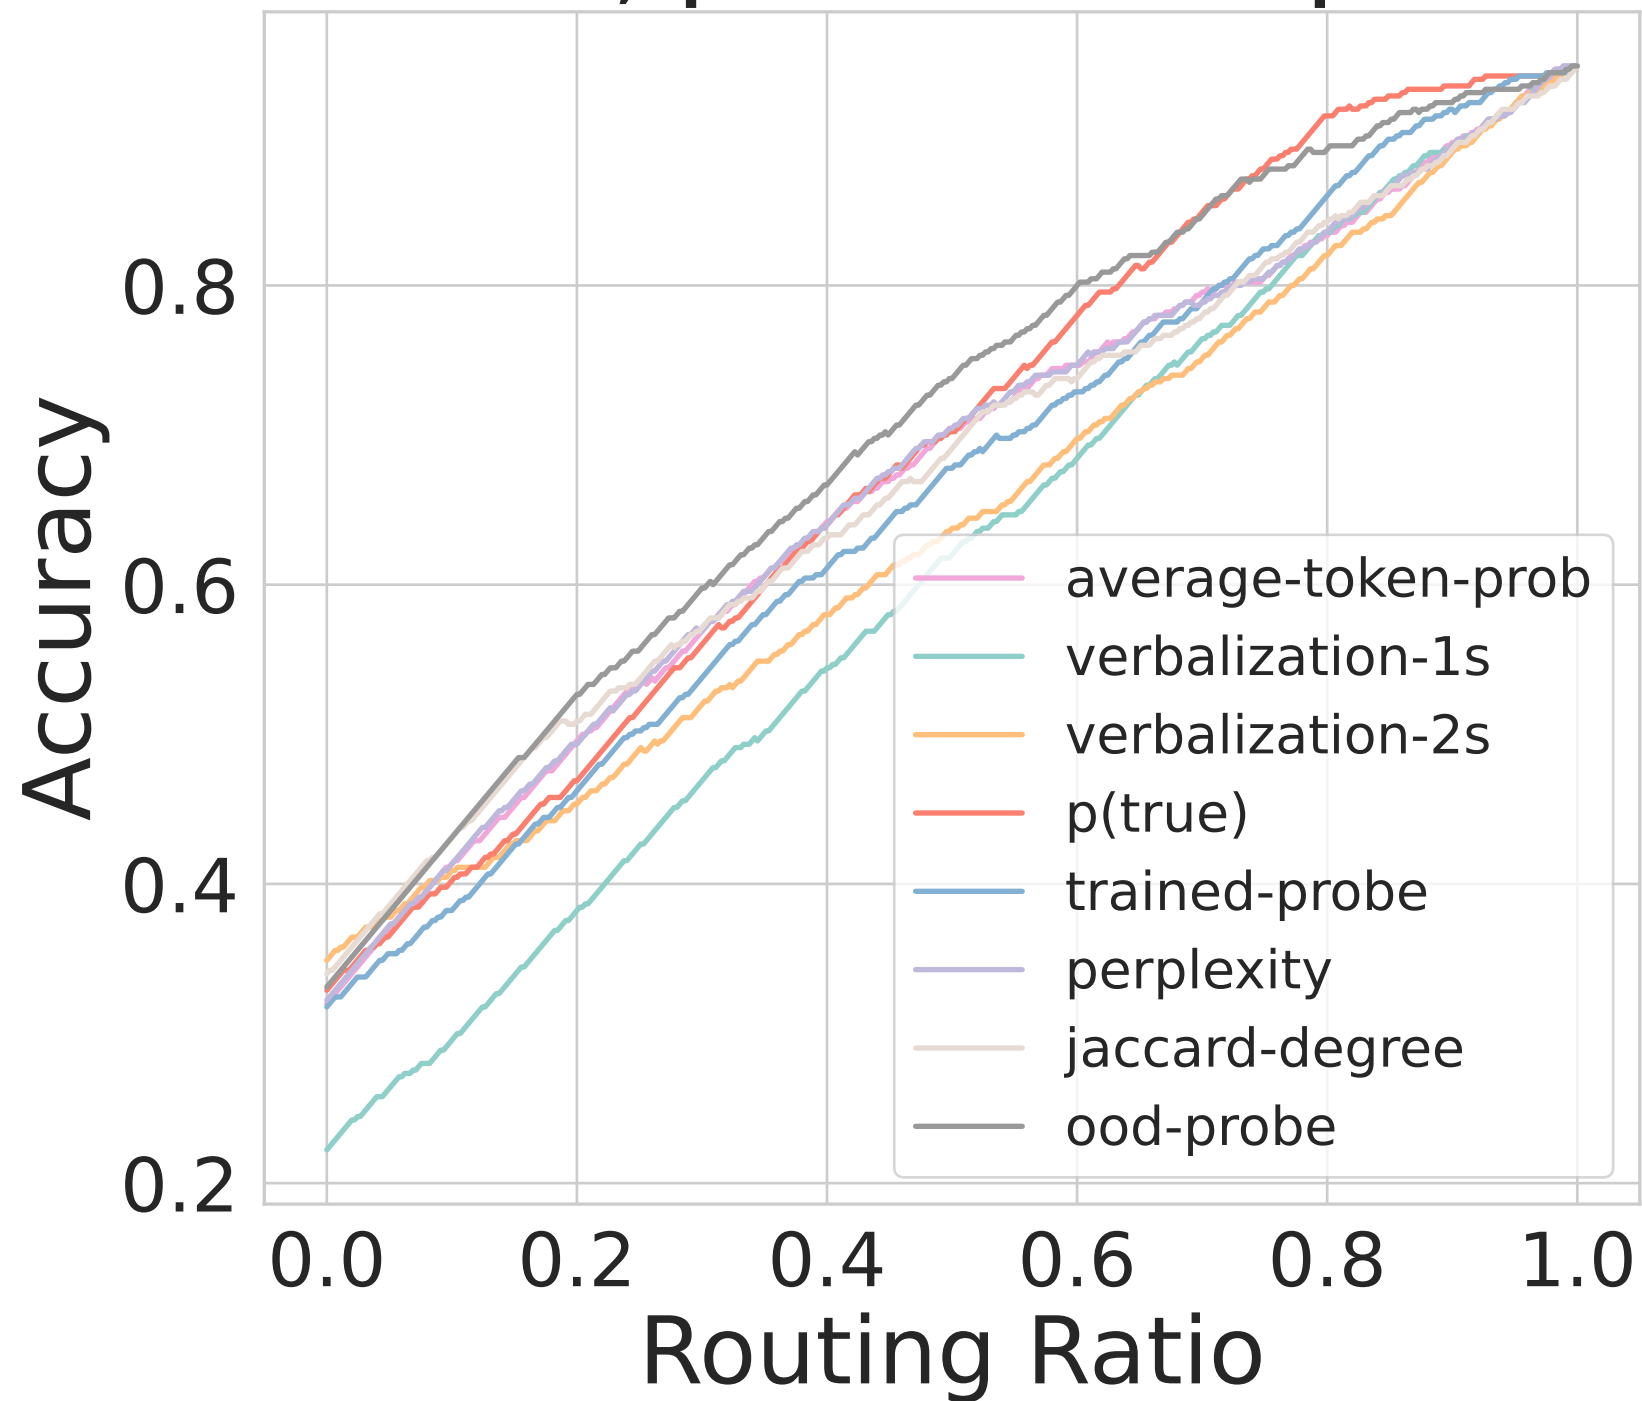

Supplement: supplementary_material [file rr_acc_math_500_qwen-2.5-7b_dsR1.pdf › Routing_SLM_LLMs/Uncertainty-based Routing/w_legend/to_dsR1/rr_acc_math_500_qwen-2.5-7b_dsR1.pdf]

# MMLU, Qwen3-1.7B to DeepSeek-R1

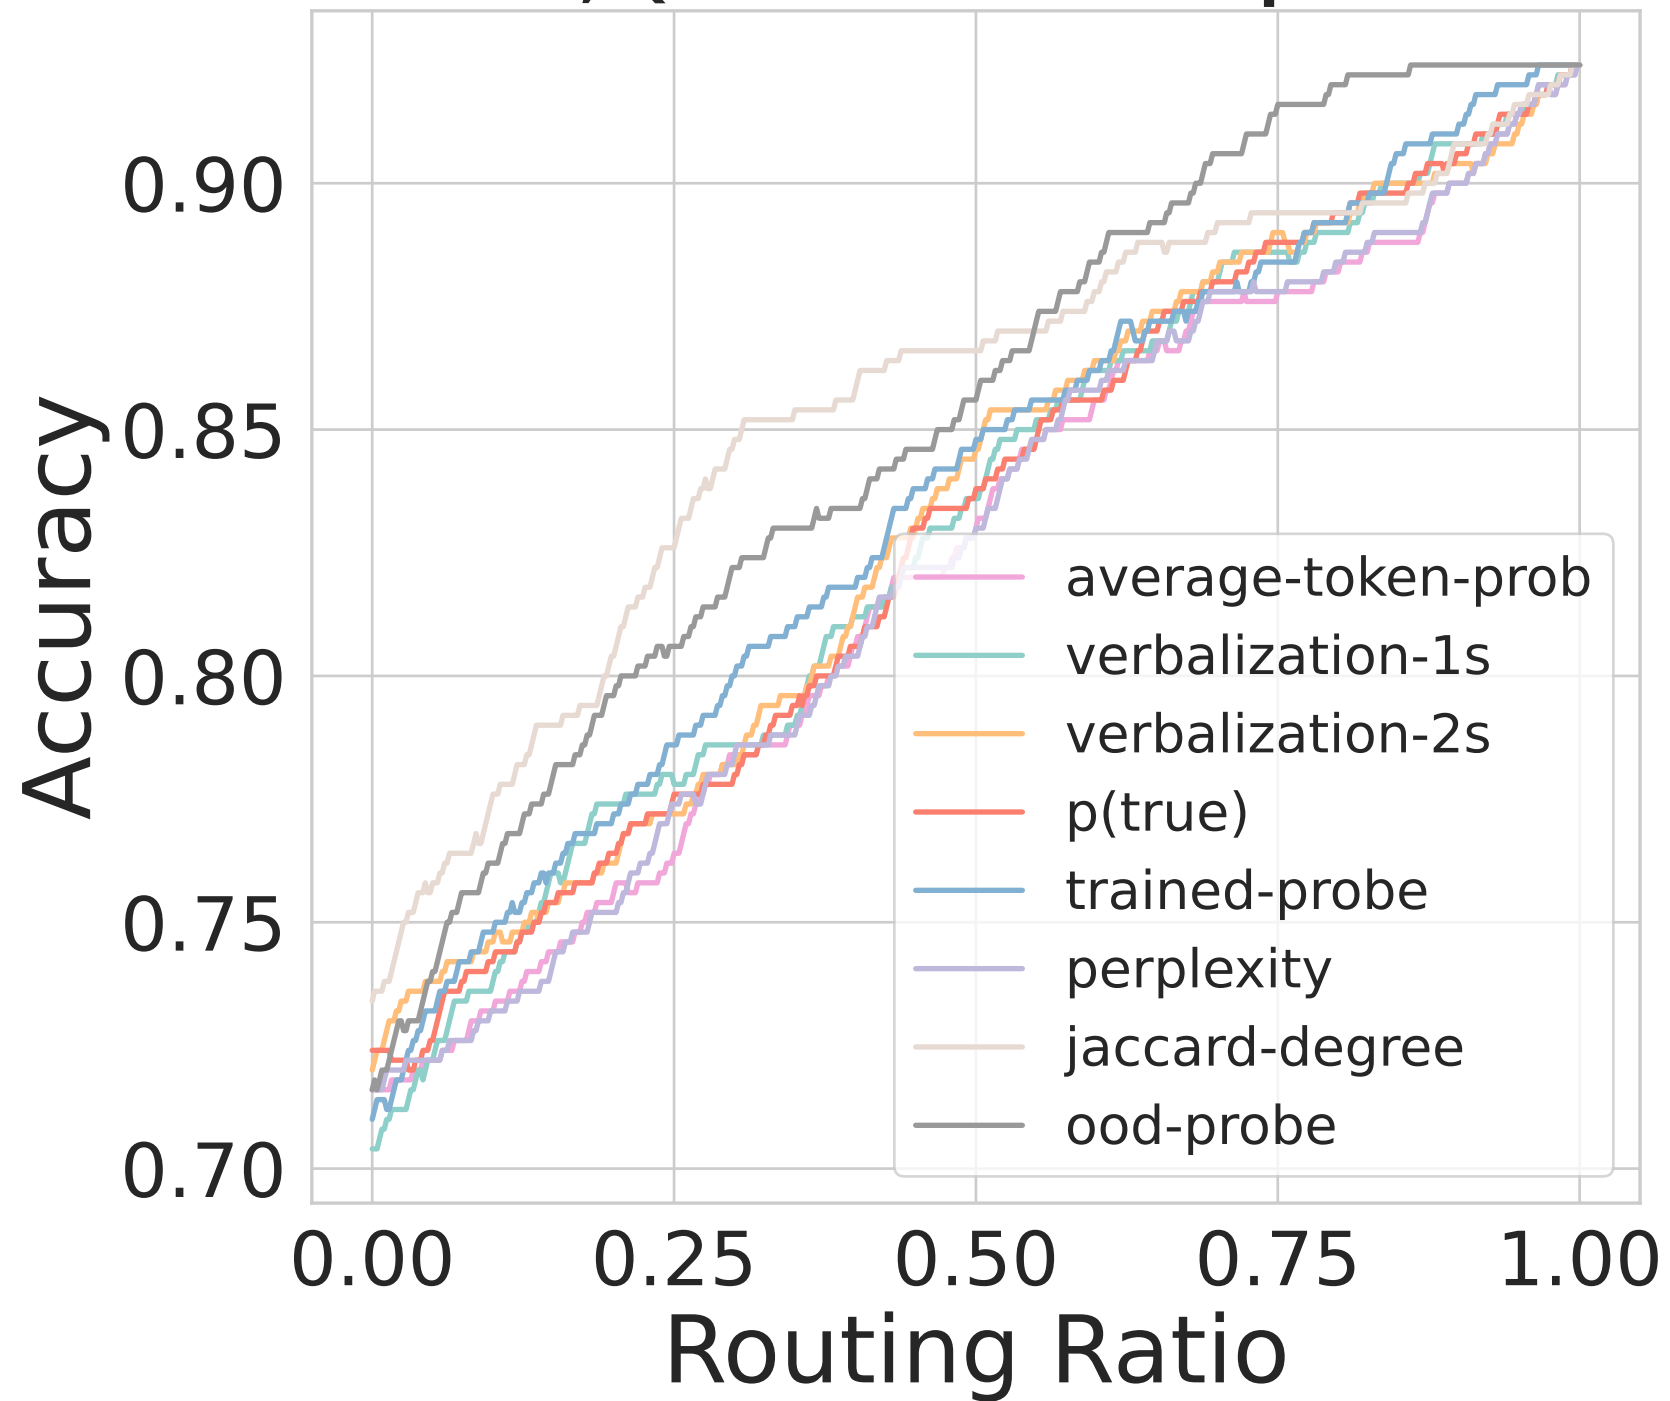

Supplement: supplementary_material [file rr_acc_mmlu_Qwen3-1.7B_dsR1.pdf › Routing_SLM_LLMs/Uncertainty-based Routing/w_legend/to_dsR1/rr_acc_mmlu_Qwen3-1.7B_dsR1.pdf]

# MMLU, Qwen3-4B to DeepSeek-R1

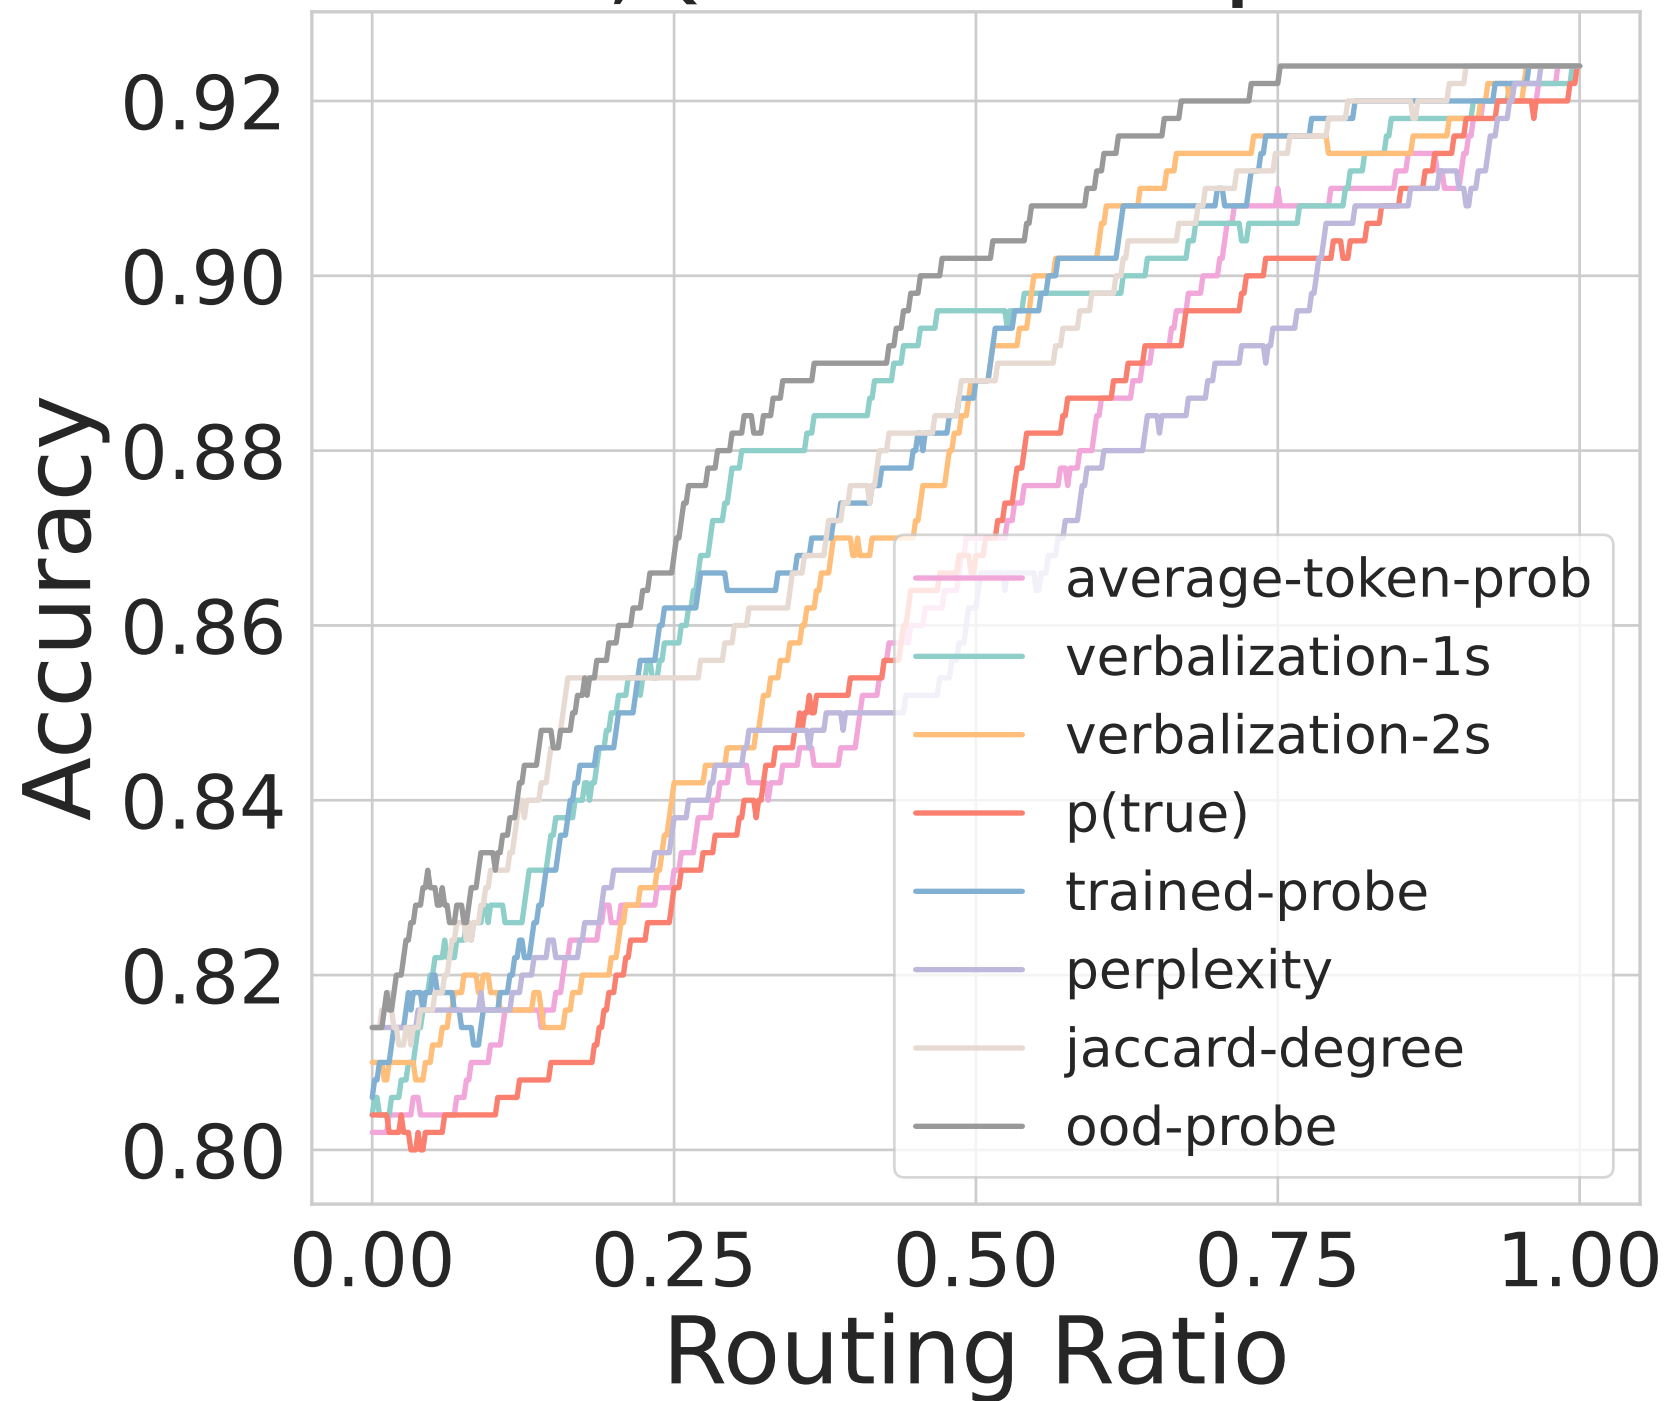

Supplement: supplementary_material [file rr_acc_mmlu_Qwen3-4B_dsR1.pdf › Routing_SLM_LLMs/Uncertainty-based Routing/w_legend/to_dsR1/rr_acc_mmlu_Qwen3-4B_dsR1.pdf]

# MMLU, granite-3.1-8b to DeepSeek-R1

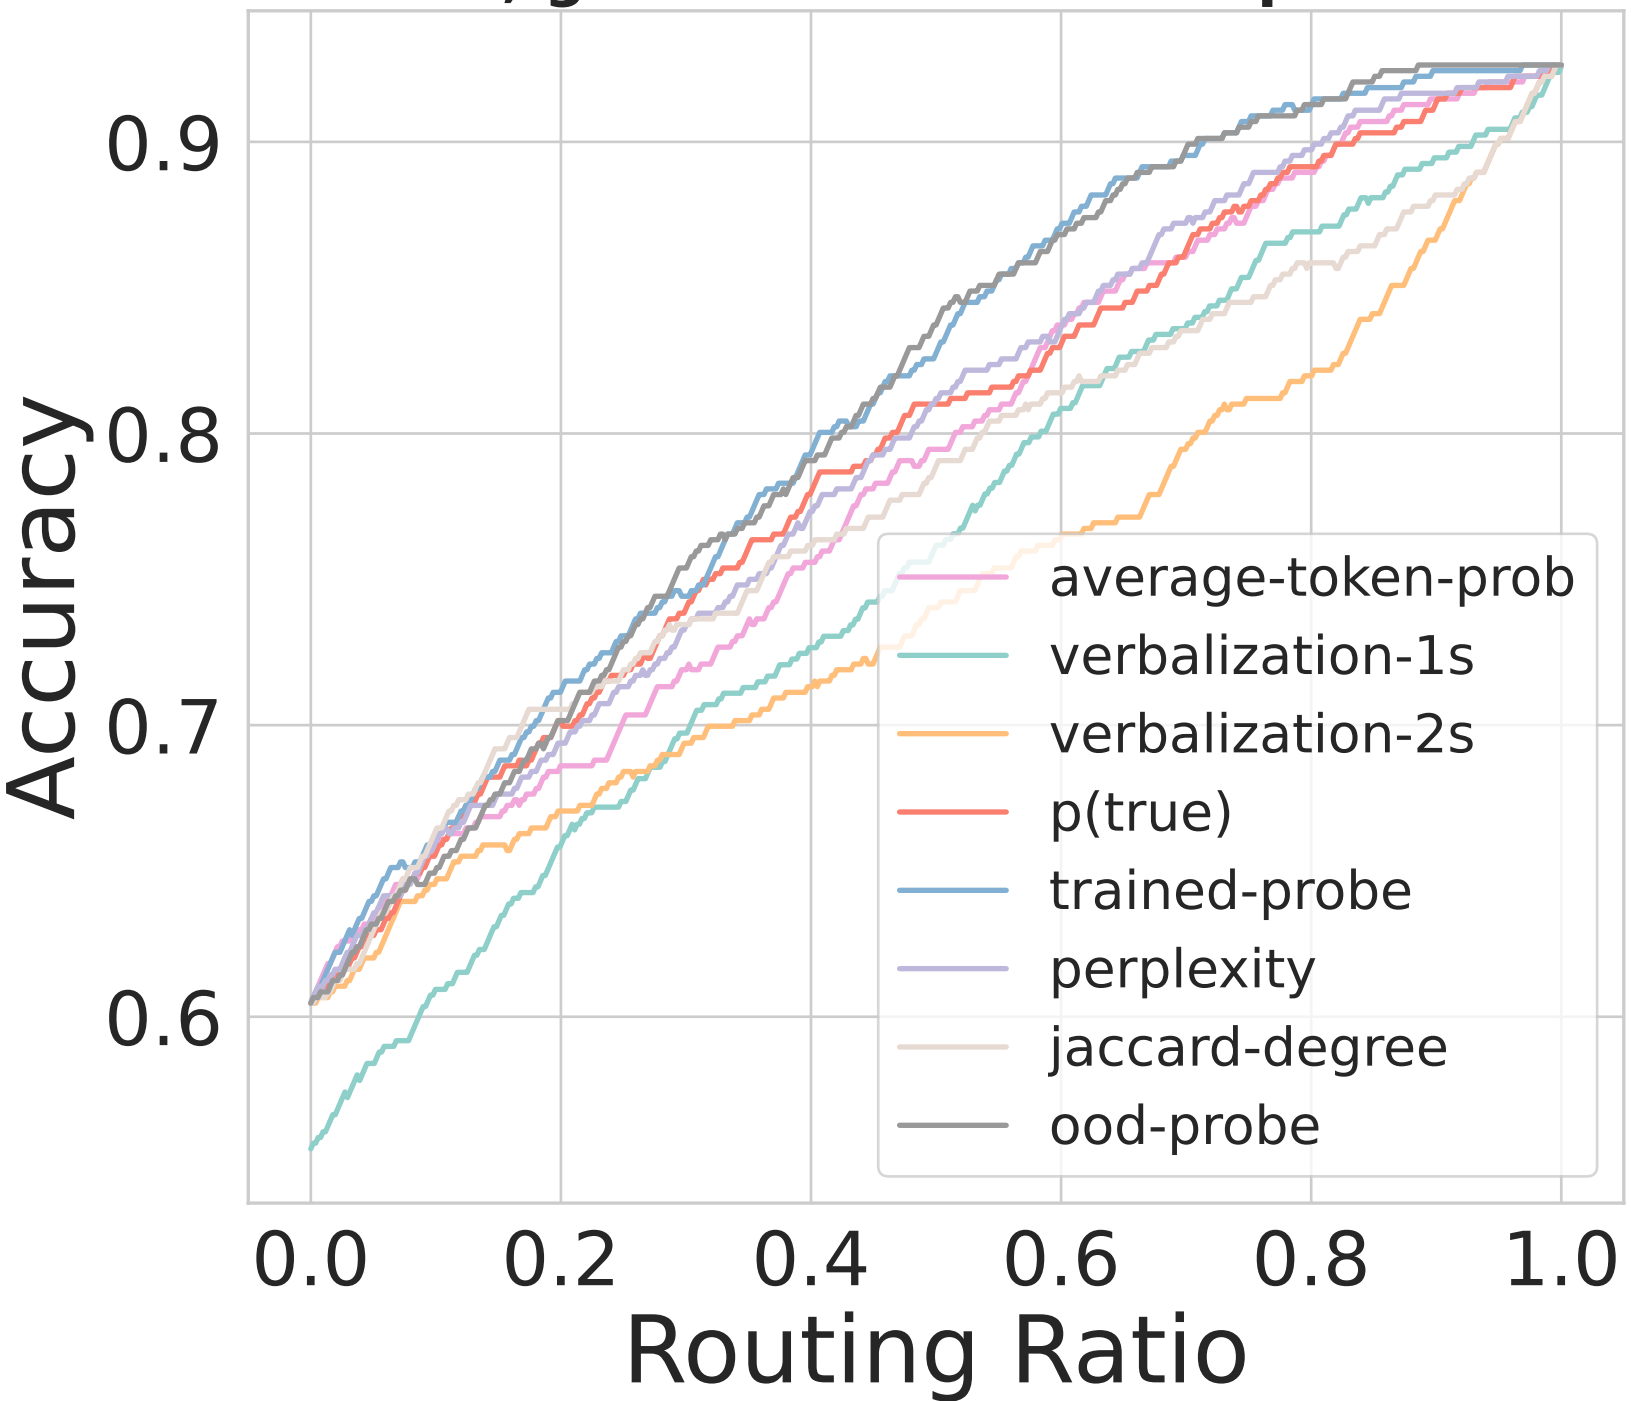

Supplement: supplementary_material [file rr_acc_mmlu_granite-3.1-8b_dsR1.pdf › Routing_SLM_LLMs/Uncertainty-based Routing/w_legend/to_dsR1/rr_acc_mmlu_granite-3.1-8b_dsR1.pdf]

# MMLU, llama-3.1-8b to DeepSeek-R1

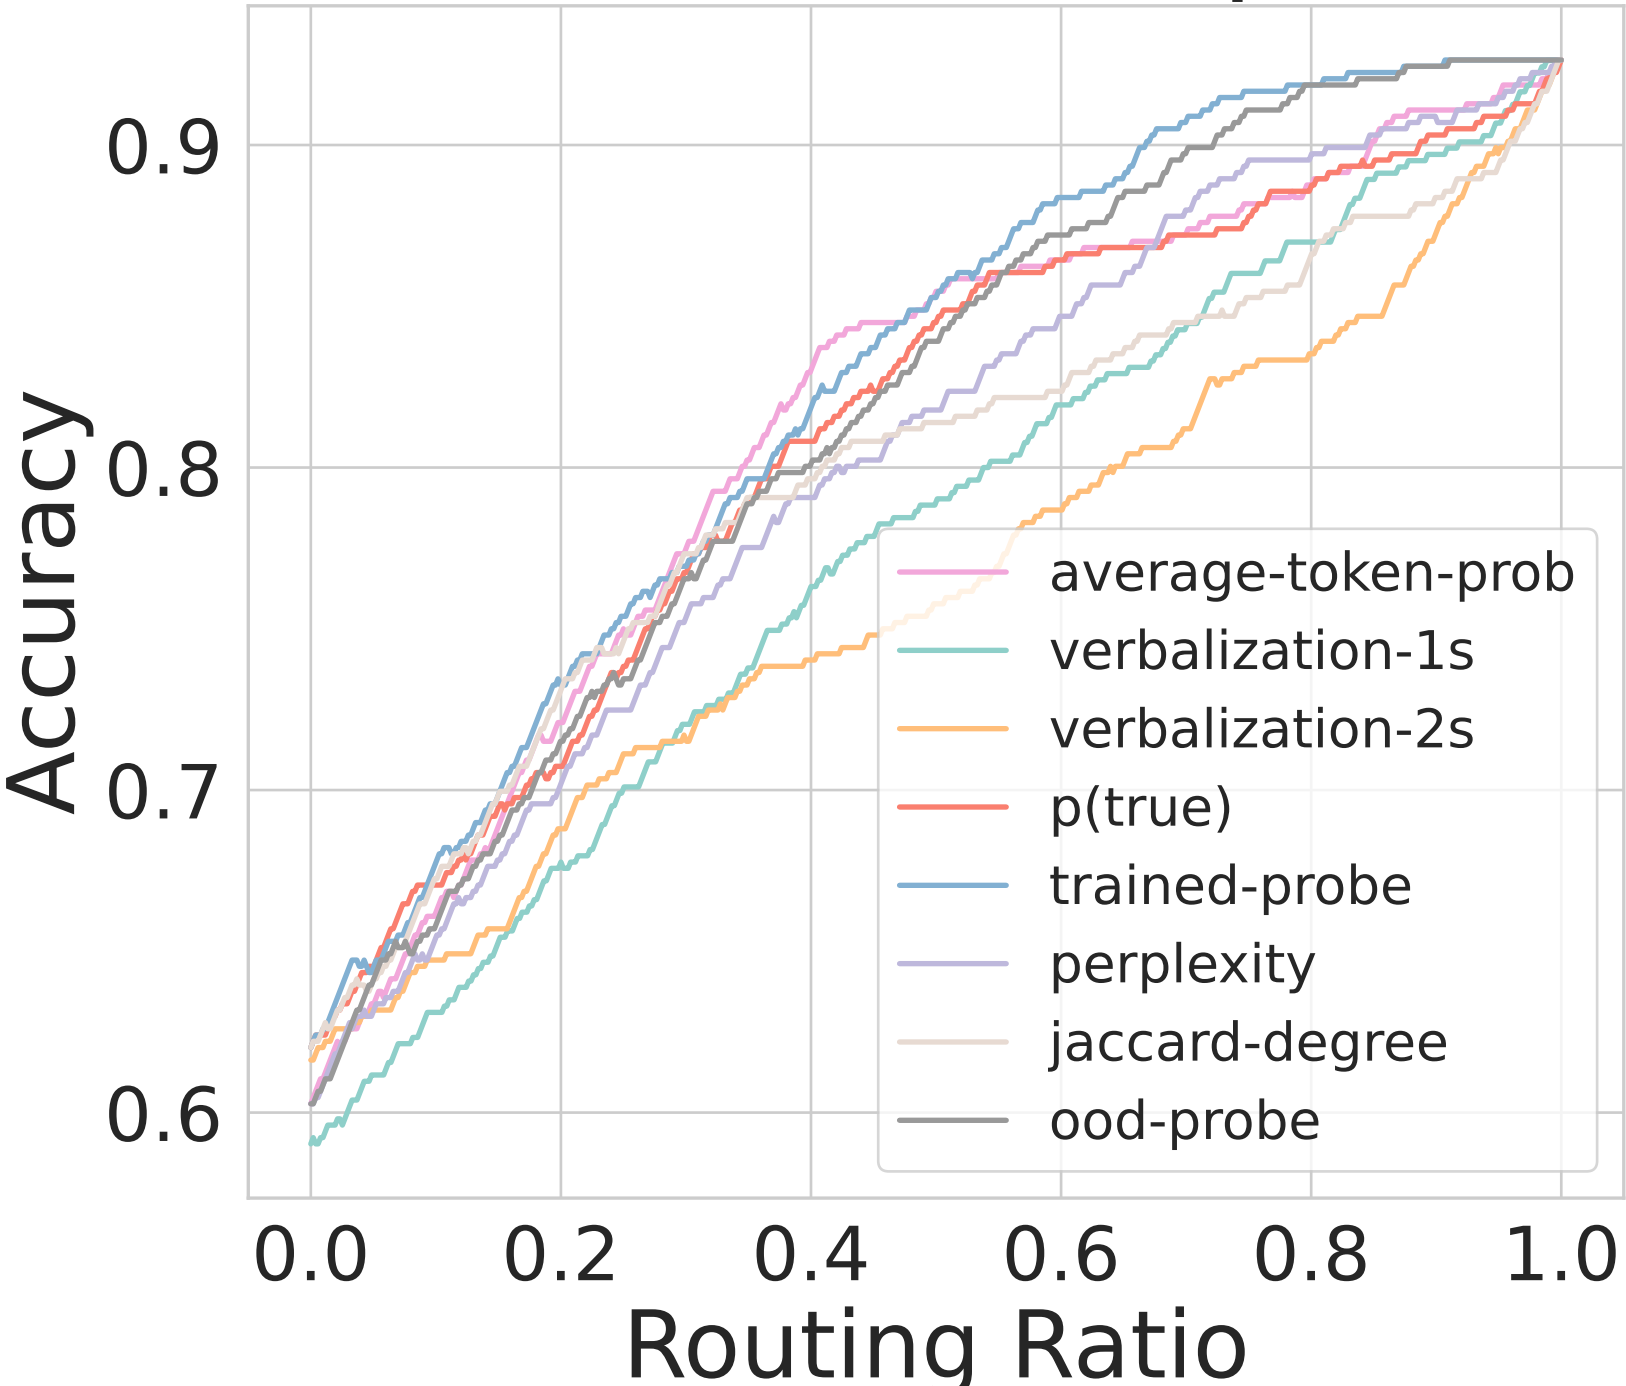

Supplement: supplementary_material [file rr_acc_mmlu_llama-3.1-8b_dsR1.pdf › Routing_SLM_LLMs/Uncertainty-based Routing/w_legend/to_dsR1/rr_acc_mmlu_llama-3.1-8b_dsR1.pdf]

# MMLU, llama-3.2-1b to DeepSeek-R1

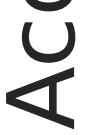

Supplement: supplementary_material [file rr_acc_mmlu_llama-3.2-1b_dsR1.pdf › Routing_SLM_LLMs/Uncertainty-based Routing/w_legend/to_dsR1/rr_acc_mmlu_llama-3.2-1b_dsR1.pdf]

# MMLU, llama-3.2-3b to DeepSeek-R1

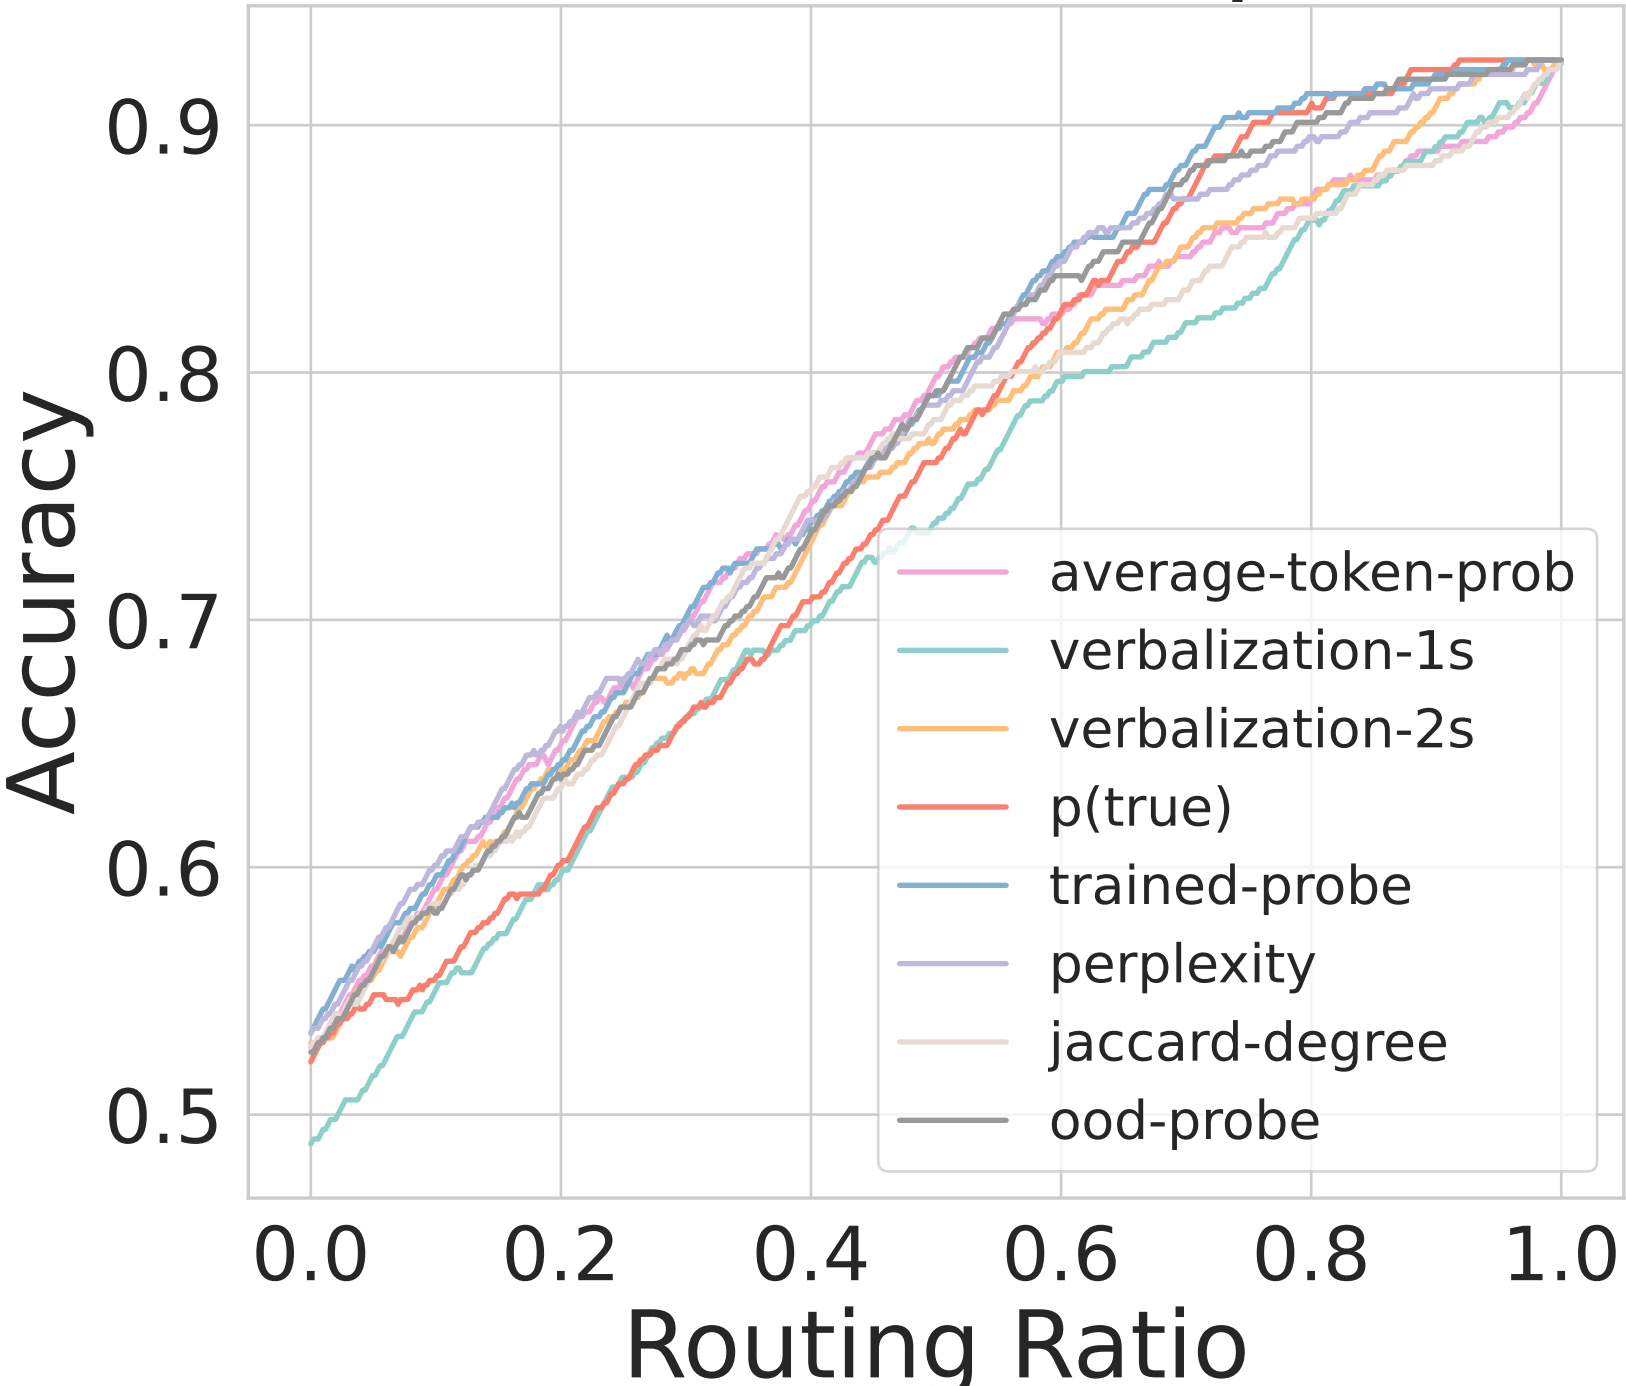

Supplement: supplementary_material [file rr_acc_mmlu_llama-3.2-3b_dsR1.pdf › Routing_SLM_LLMs/Uncertainty-based Routing/w_legend/to_dsR1/rr_acc_mmlu_llama-3.2-3b_dsR1.pdf]

**MMLU, mistral-7b to DeepSeek-R1**

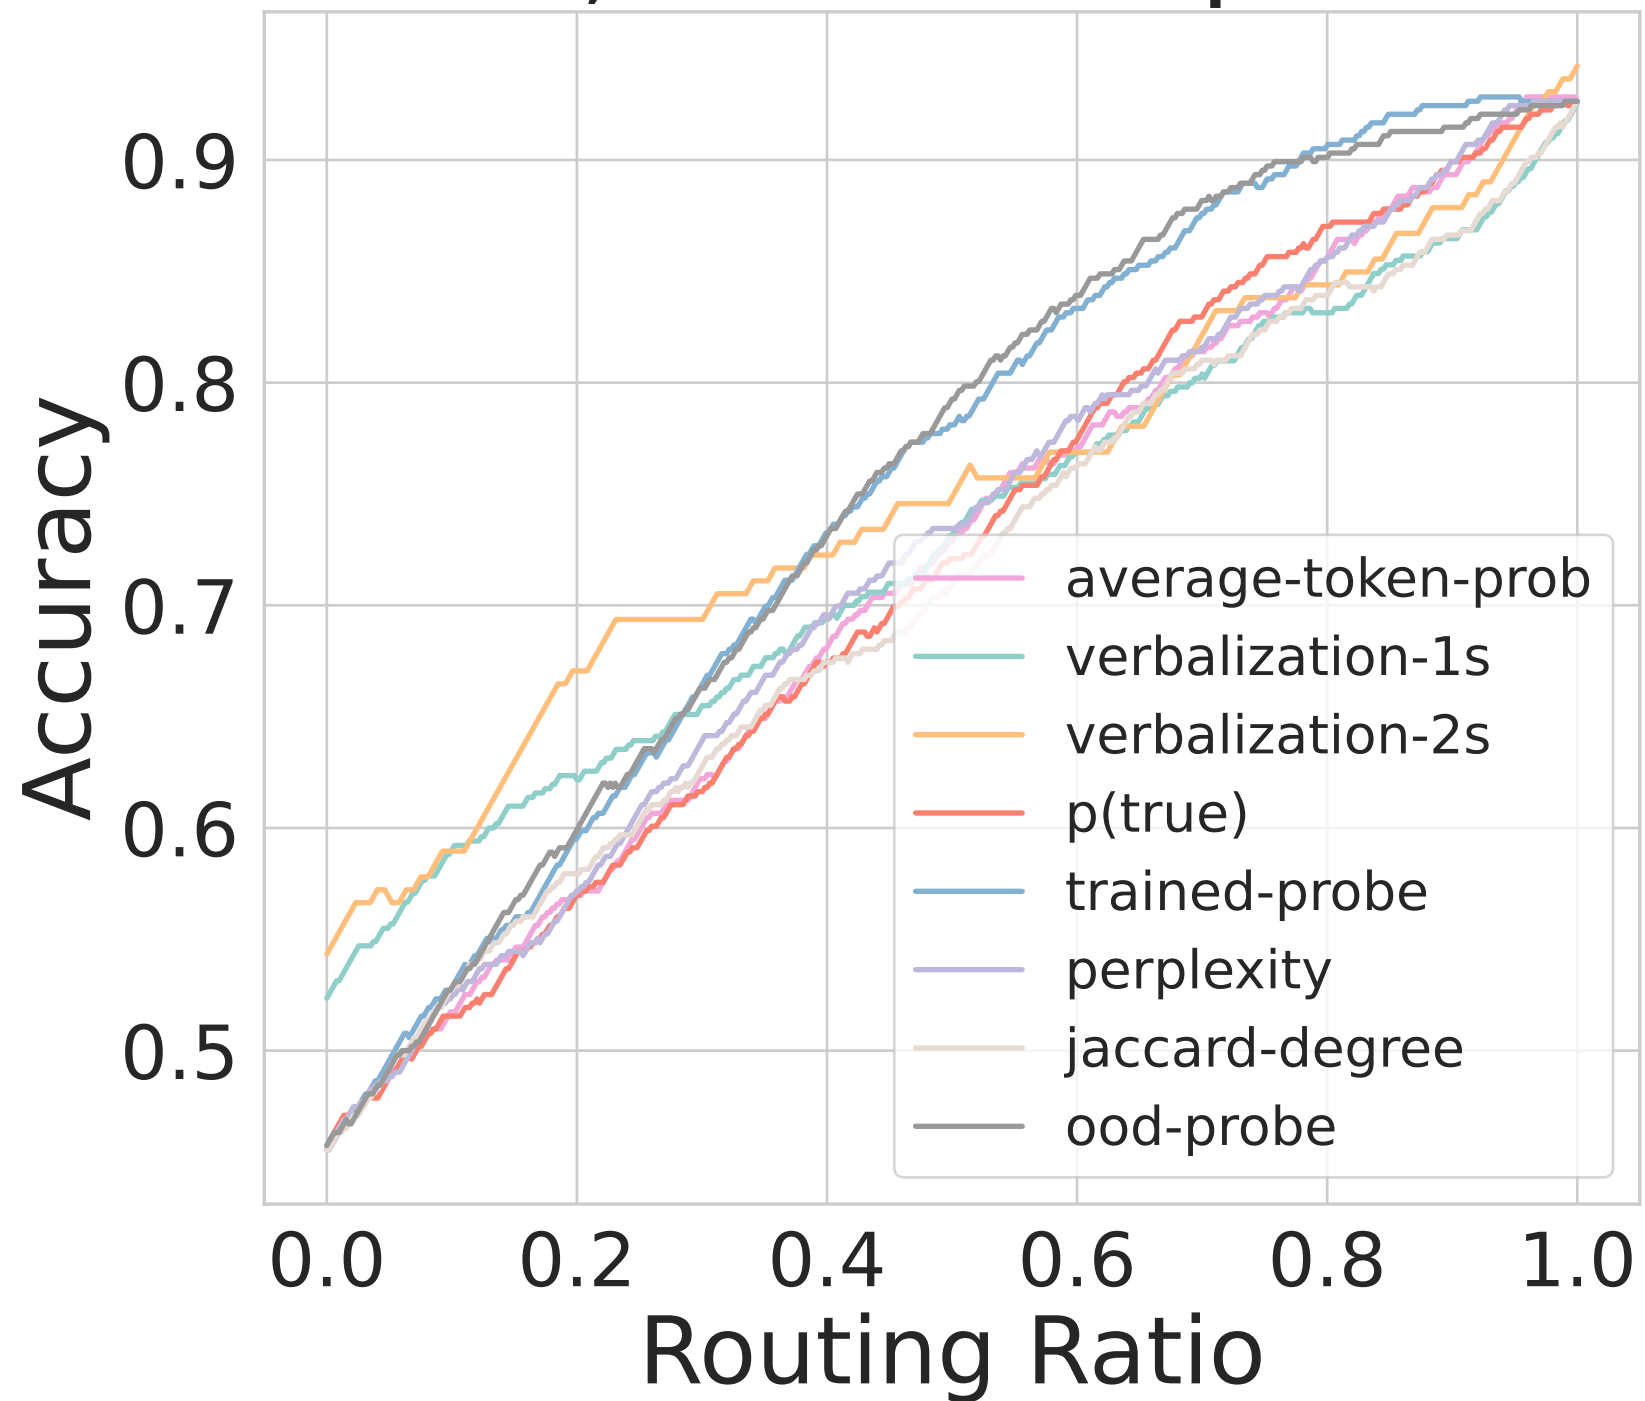

Supplement: supplementary_material [file rr_acc_mmlu_mistral-7b_dsR1.pdf › Routing_SLM_LLMs/Uncertainty-based Routing/w_legend/to_dsR1/rr_acc_mmlu_mistral-7b_dsR1.pdf]

**MMLU, phi-3.5-mini to DeepSeek-R1**

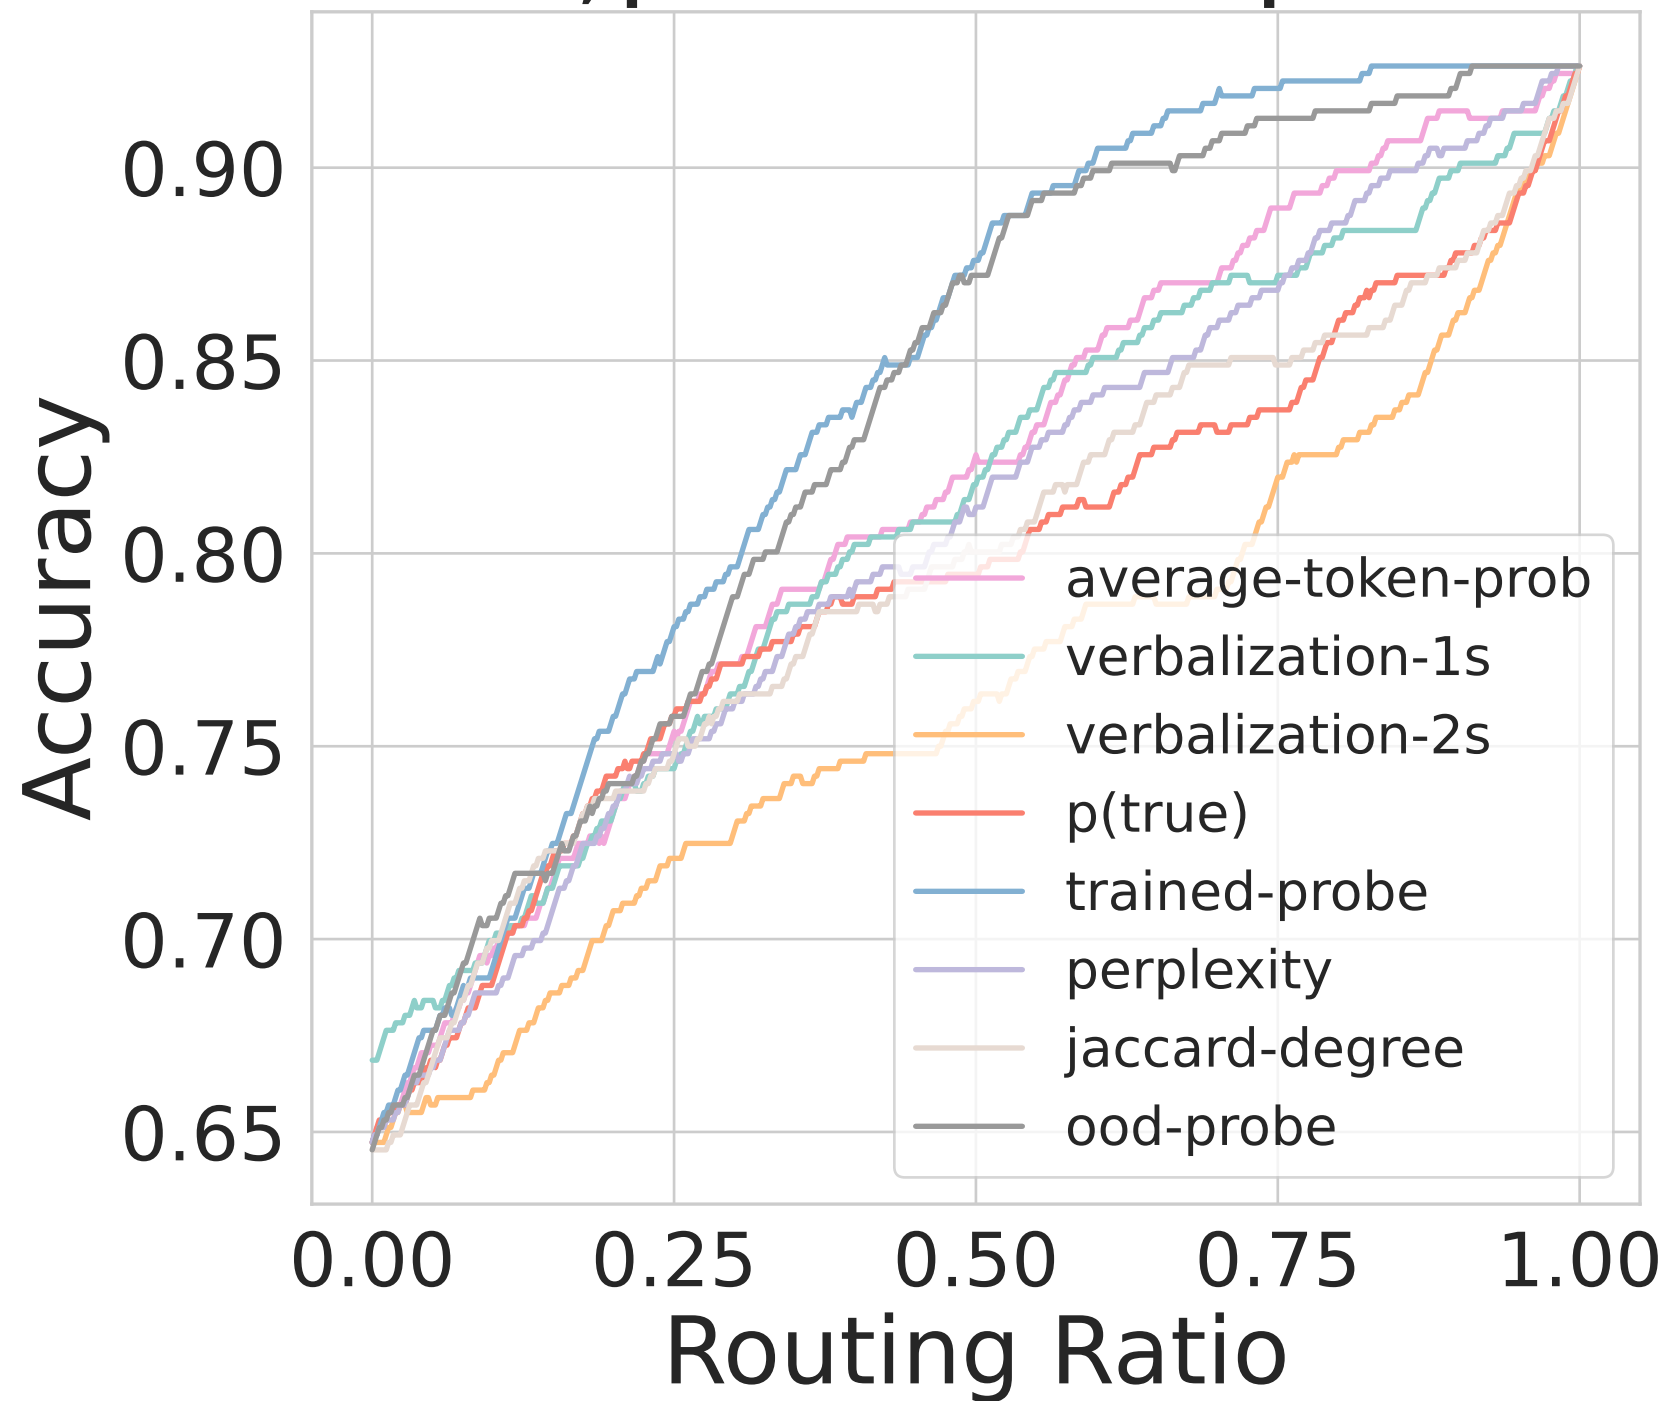

Supplement: supplementary_material [file rr_acc_mmlu_phi-3.5-mini_dsR1.pdf › Routing_SLM_LLMs/Uncertainty-based Routing/w_legend/to_dsR1/rr_acc_mmlu_phi-3.5-mini_dsR1.pdf]

# MMLU, phi-4-mini-reasoning to DeepSeek-R1

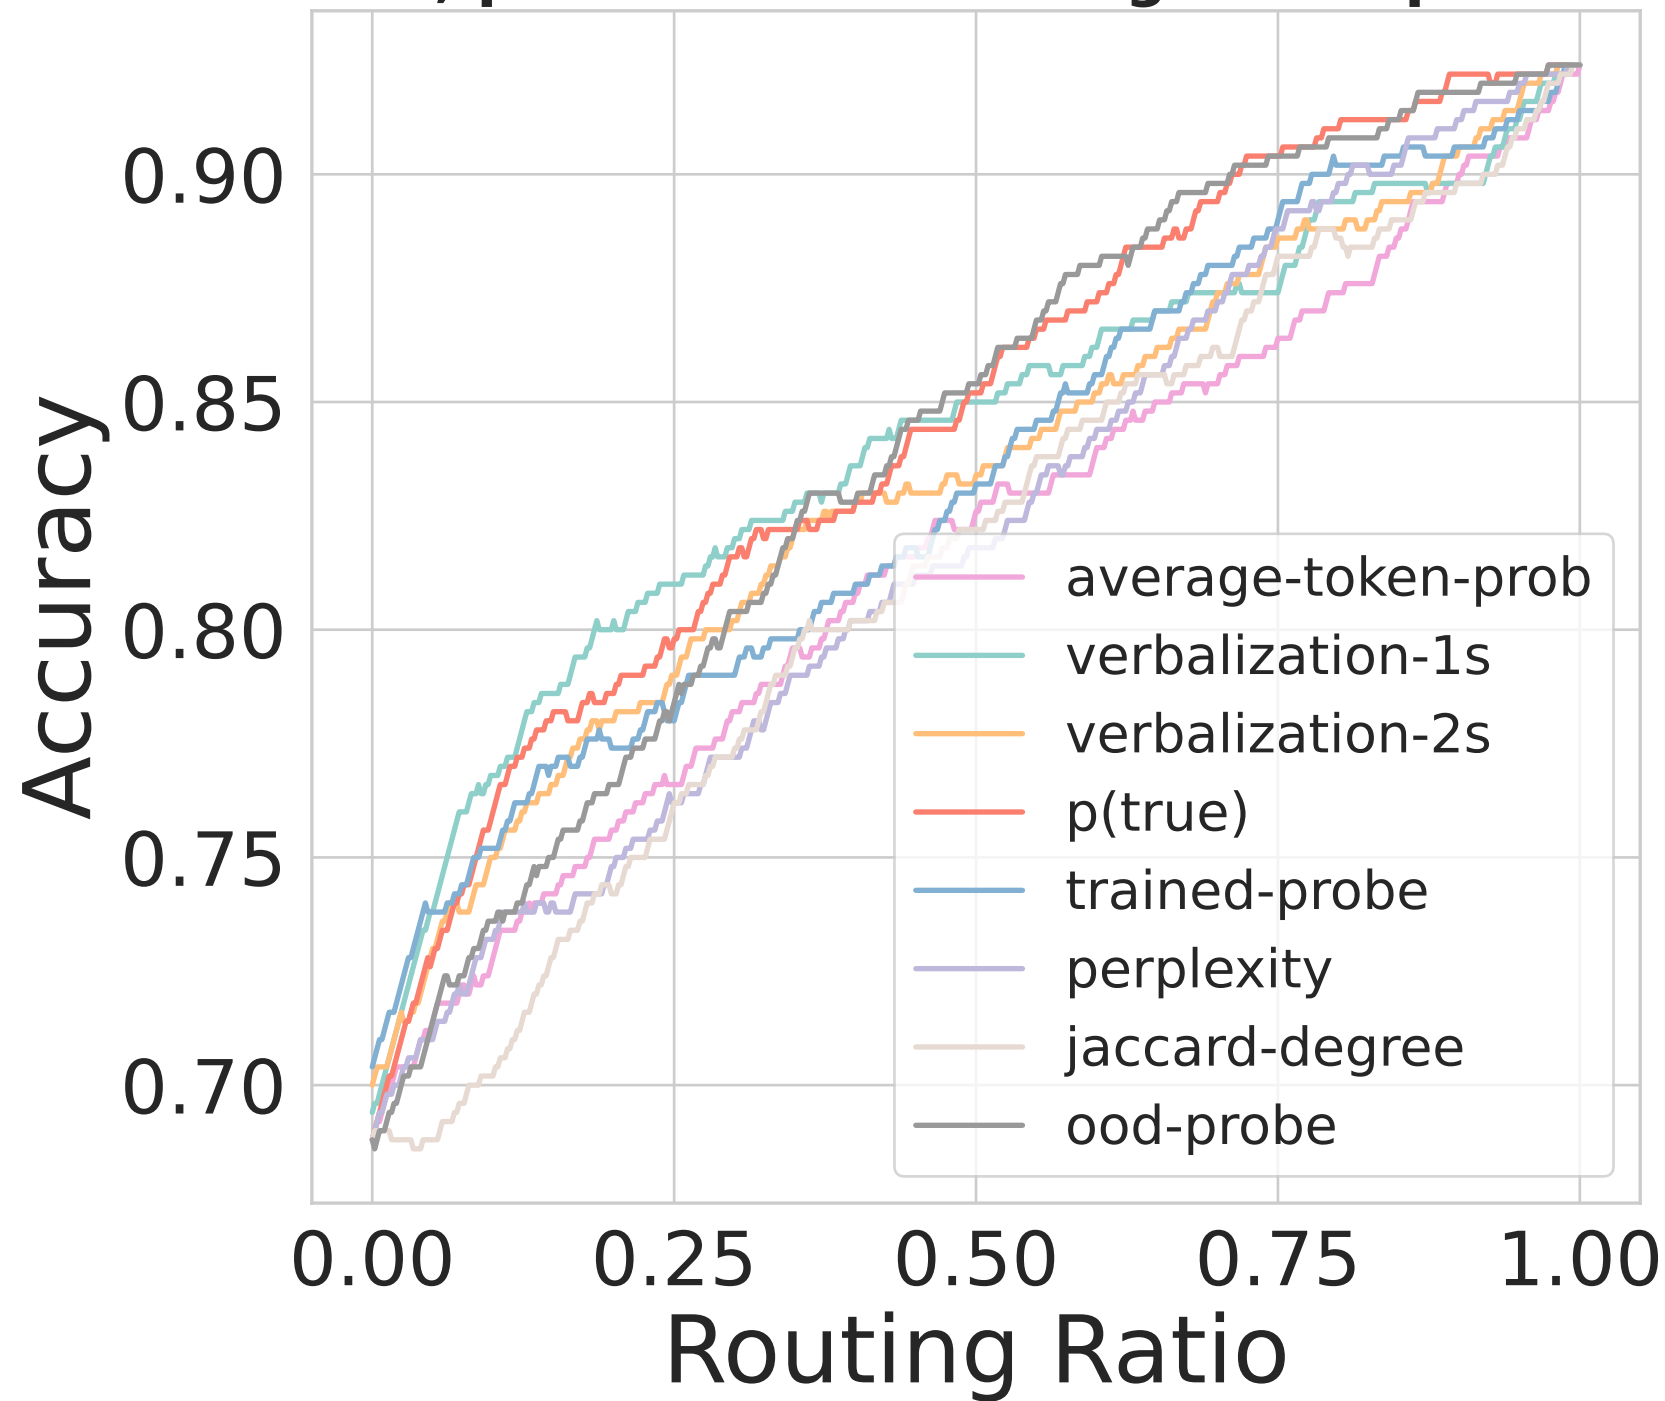

Supplement: supplementary_material [file rr_acc_mmlu_phi-4-mini-reasoning_dsR1.pdf › Routing_SLM_LLMs/Uncertainty-based Routing/w_legend/to_dsR1/rr_acc_mmlu_phi-4-mini-reasoning_dsR1.pdf]

**MMLU, qwen-2.5-7b to DeepSeek-R1**

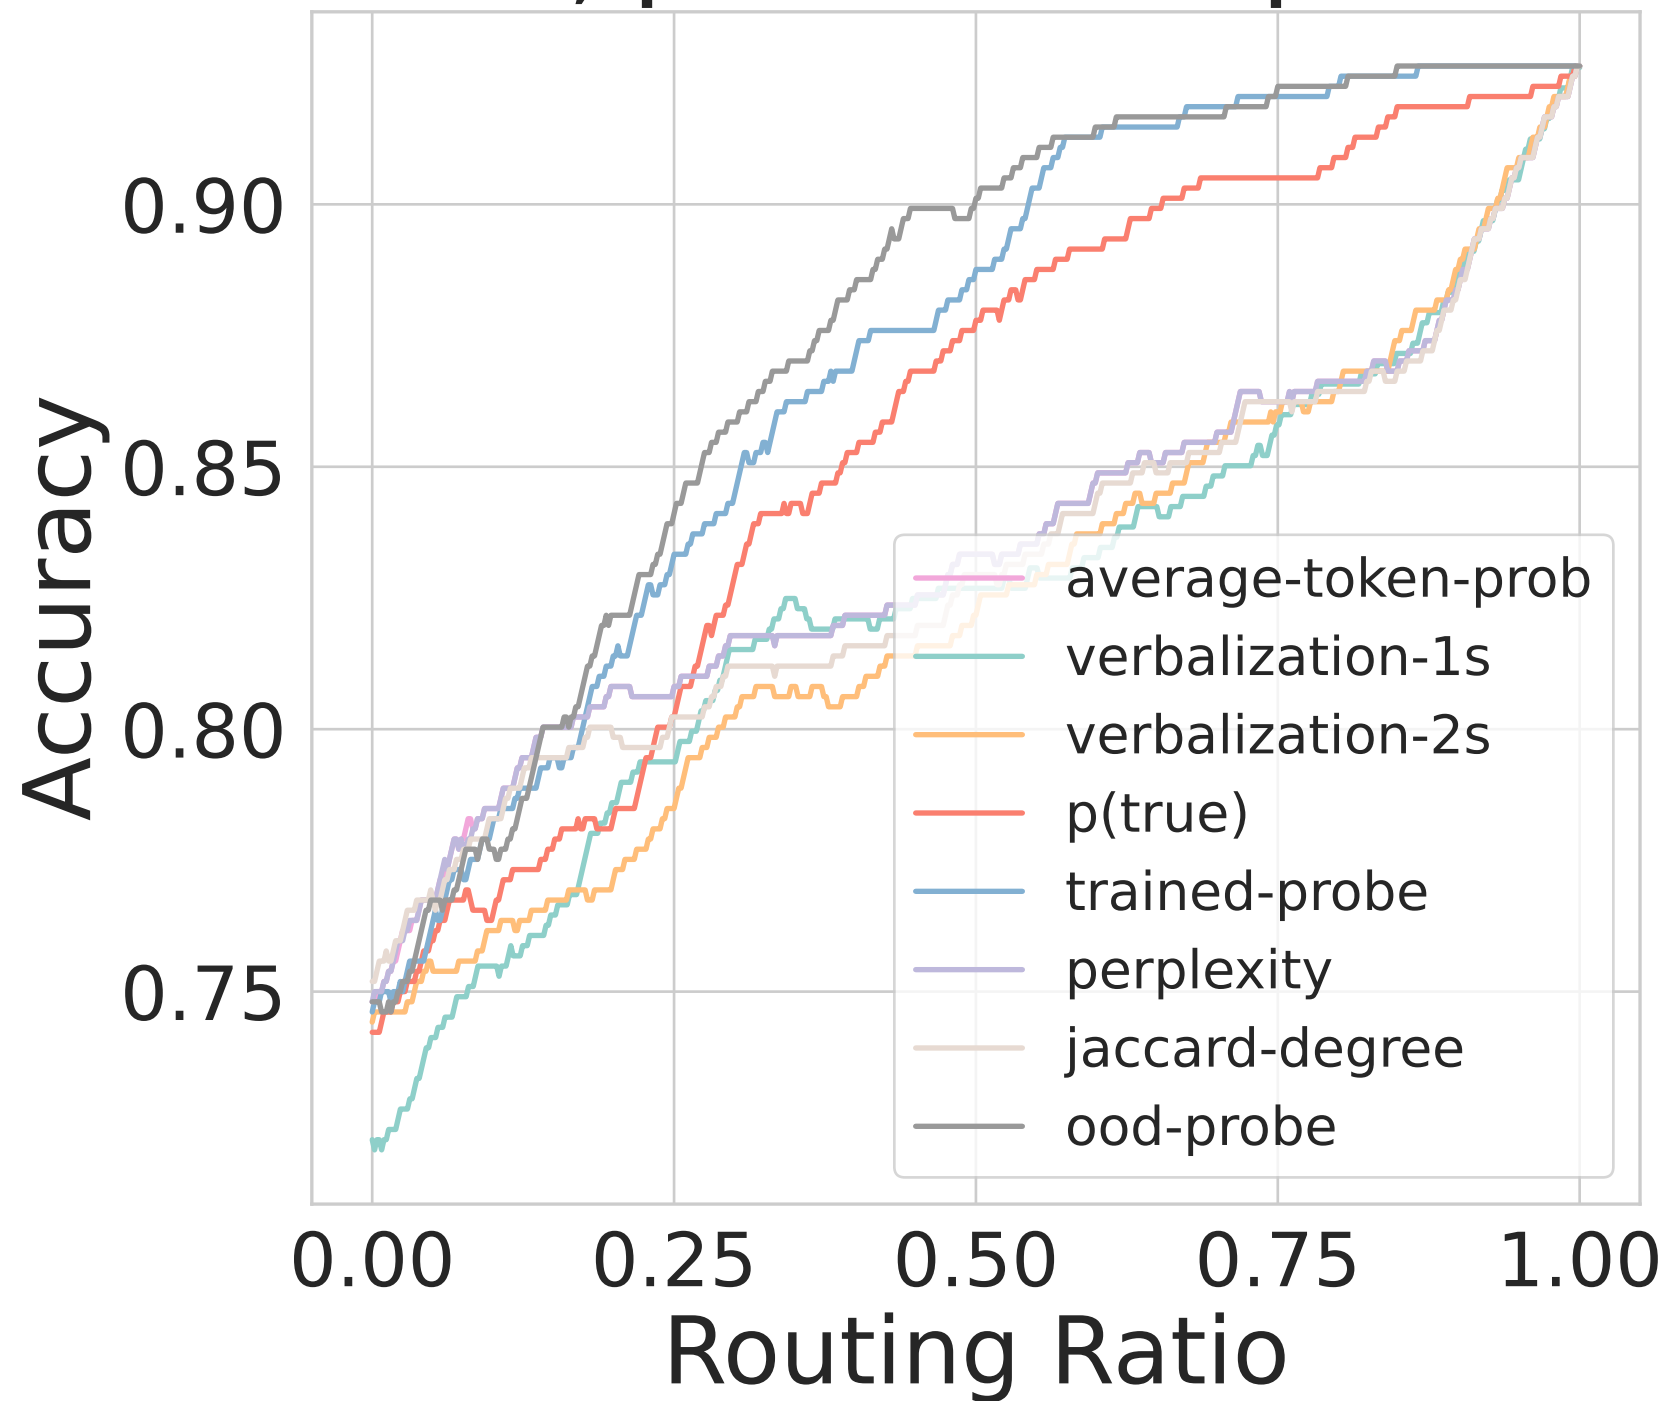

Supplement: supplementary_material [file rr_acc_mmlu_qwen-2.5-7b_dsR1.pdf › Routing_SLM_LLMs/Uncertainty-based Routing/w_legend/to_dsR1/rr_acc_mmlu_qwen-2.5-7b_dsR1.pdf]

# MMLU, rwkv to DeepSeek-R1

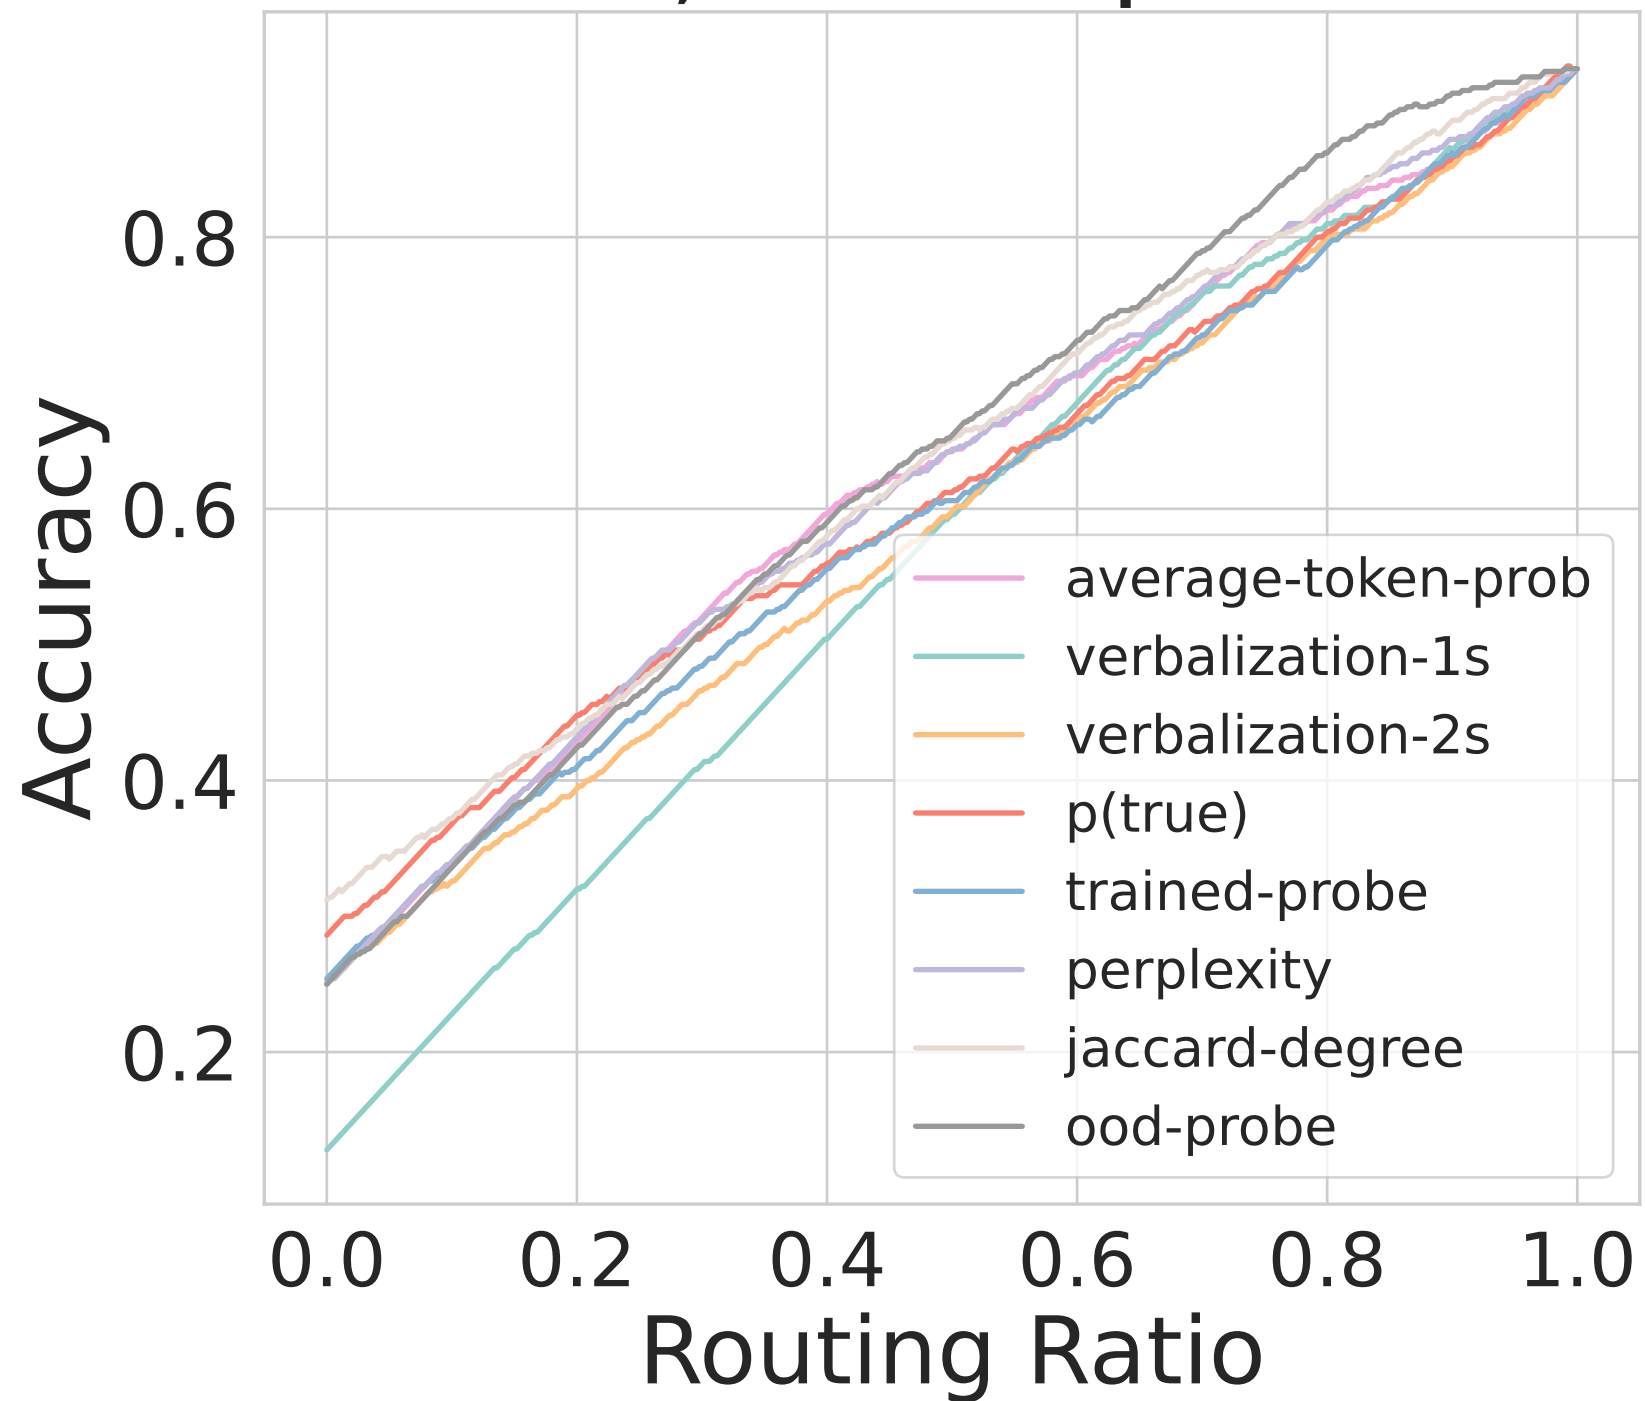

Supplement: supplementary_material [file rr_acc_mmlu_rwkv_dsR1.pdf › Routing_SLM_LLMs/Uncertainty-based Routing/w_legend/to_dsR1/rr_acc_mmlu_rwkv_dsR1.pdf]

**MultiArith, Qwen3-0.6B to DeepSeek-R1**

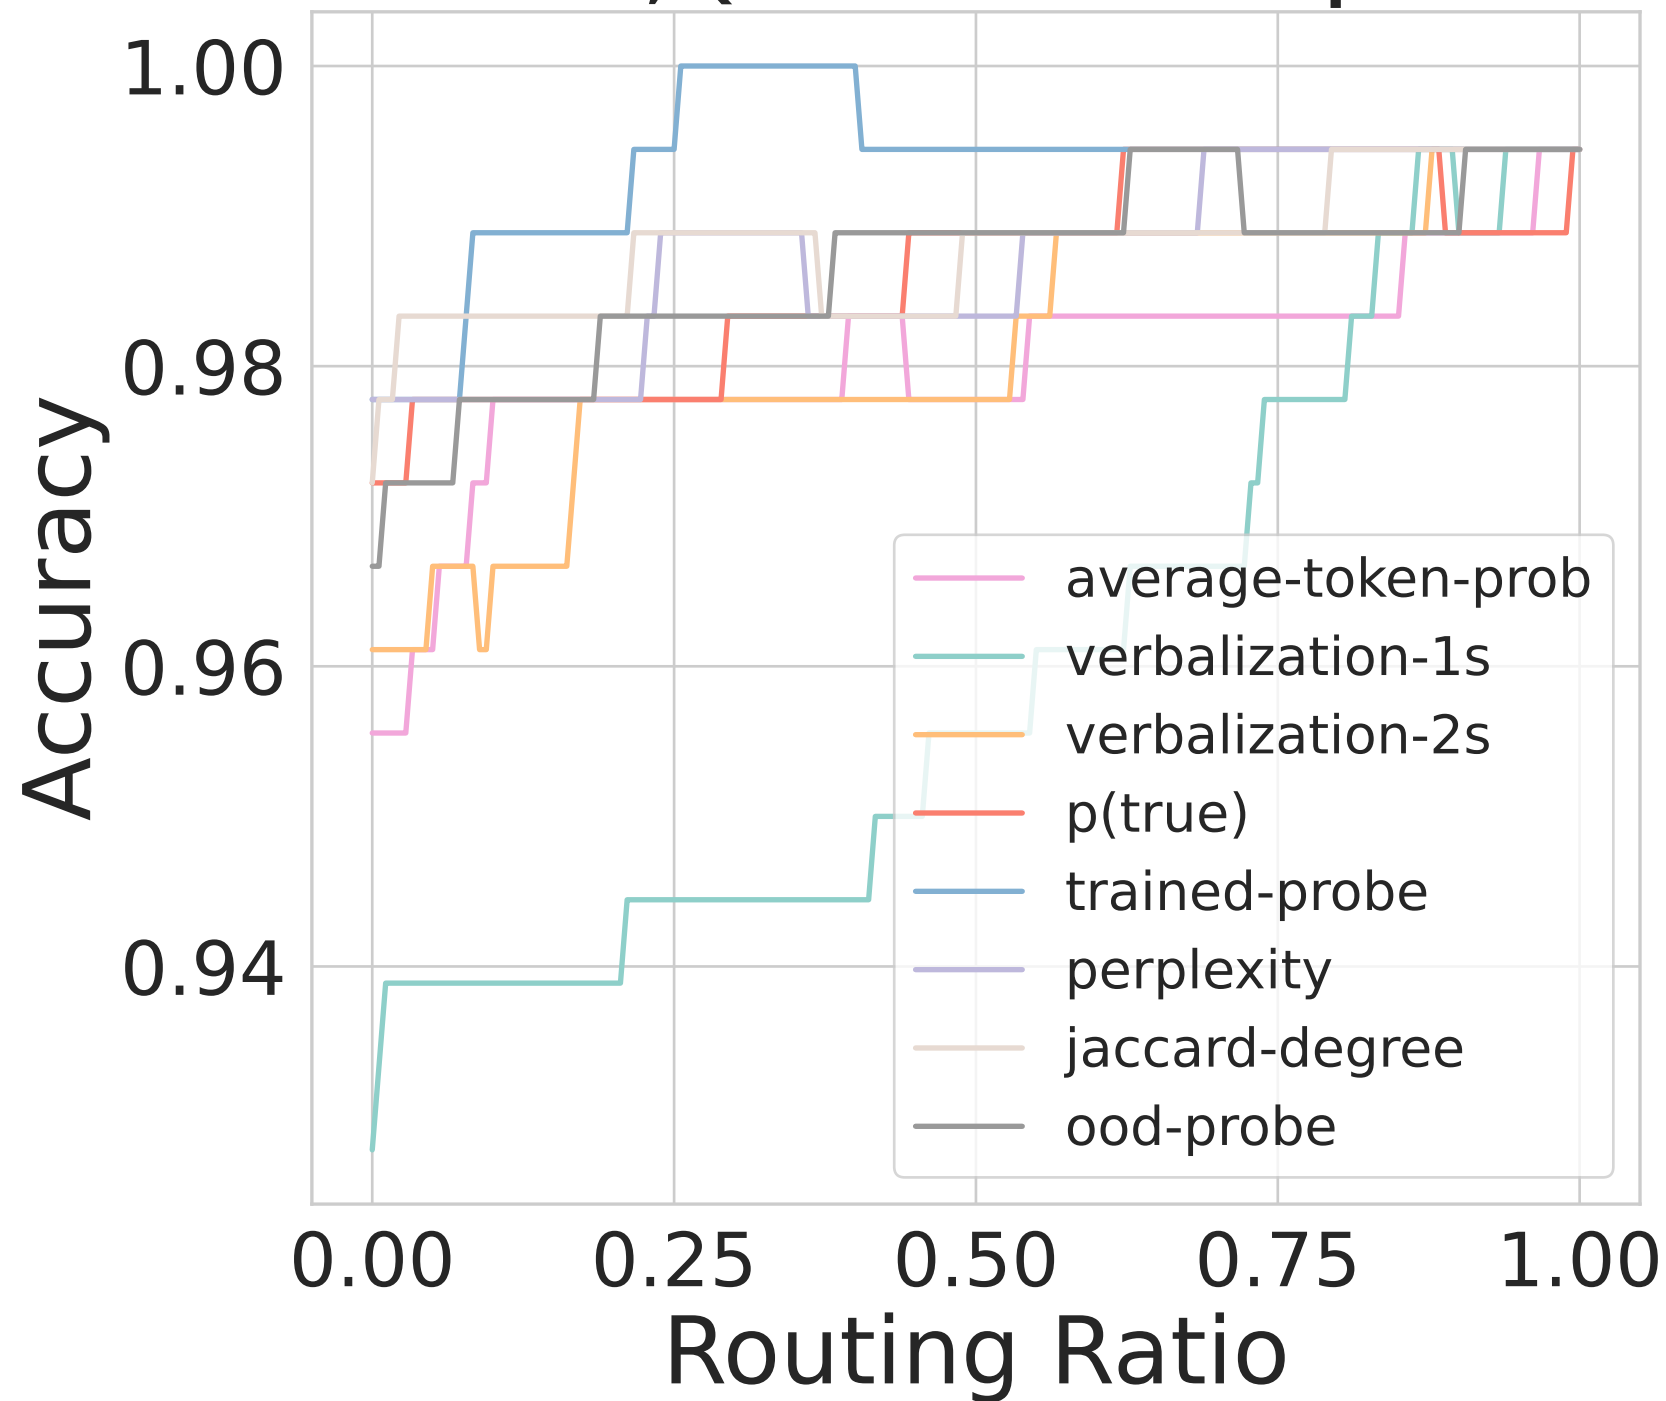

Supplement: supplementary_material [file rr_acc_multiarith_Qwen3-0.6B_dsR1.pdf › Routing_SLM_LLMs/Uncertainty-based Routing/w_legend/to_dsR1/rr_acc_multiarith_Qwen3-0.6B_dsR1.pdf]

**MultiArith, Qwen3-1.7B to DeepSeek-R1**

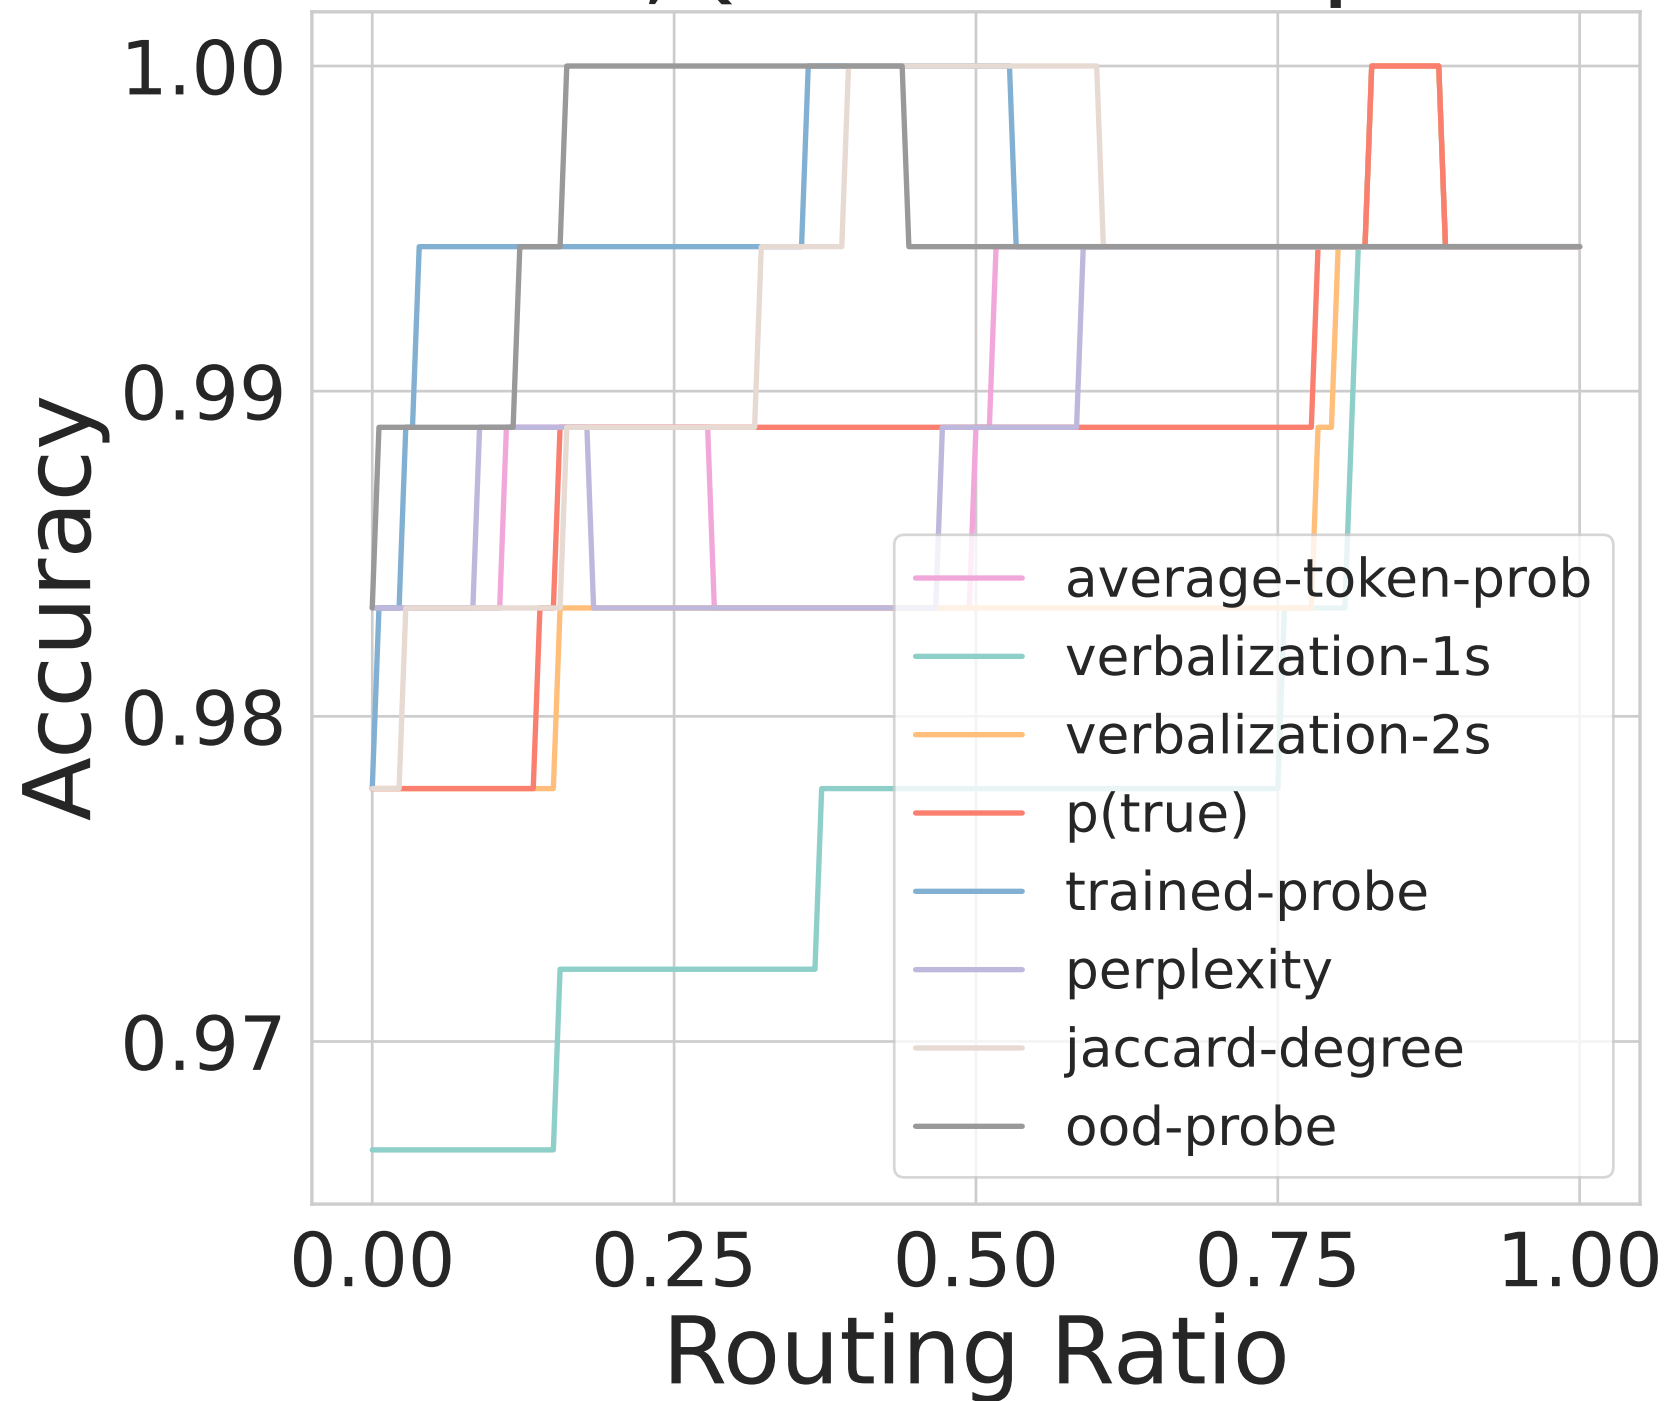

Supplement: supplementary_material [file rr_acc_multiarith_Qwen3-1.7B_dsR1.pdf › Routing_SLM_LLMs/Uncertainty-based Routing/w_legend/to_dsR1/rr_acc_multiarith_Qwen3-1.7B_dsR1.pdf]

**MultiArith, Qwen3-4B to DeepSeek-R1**

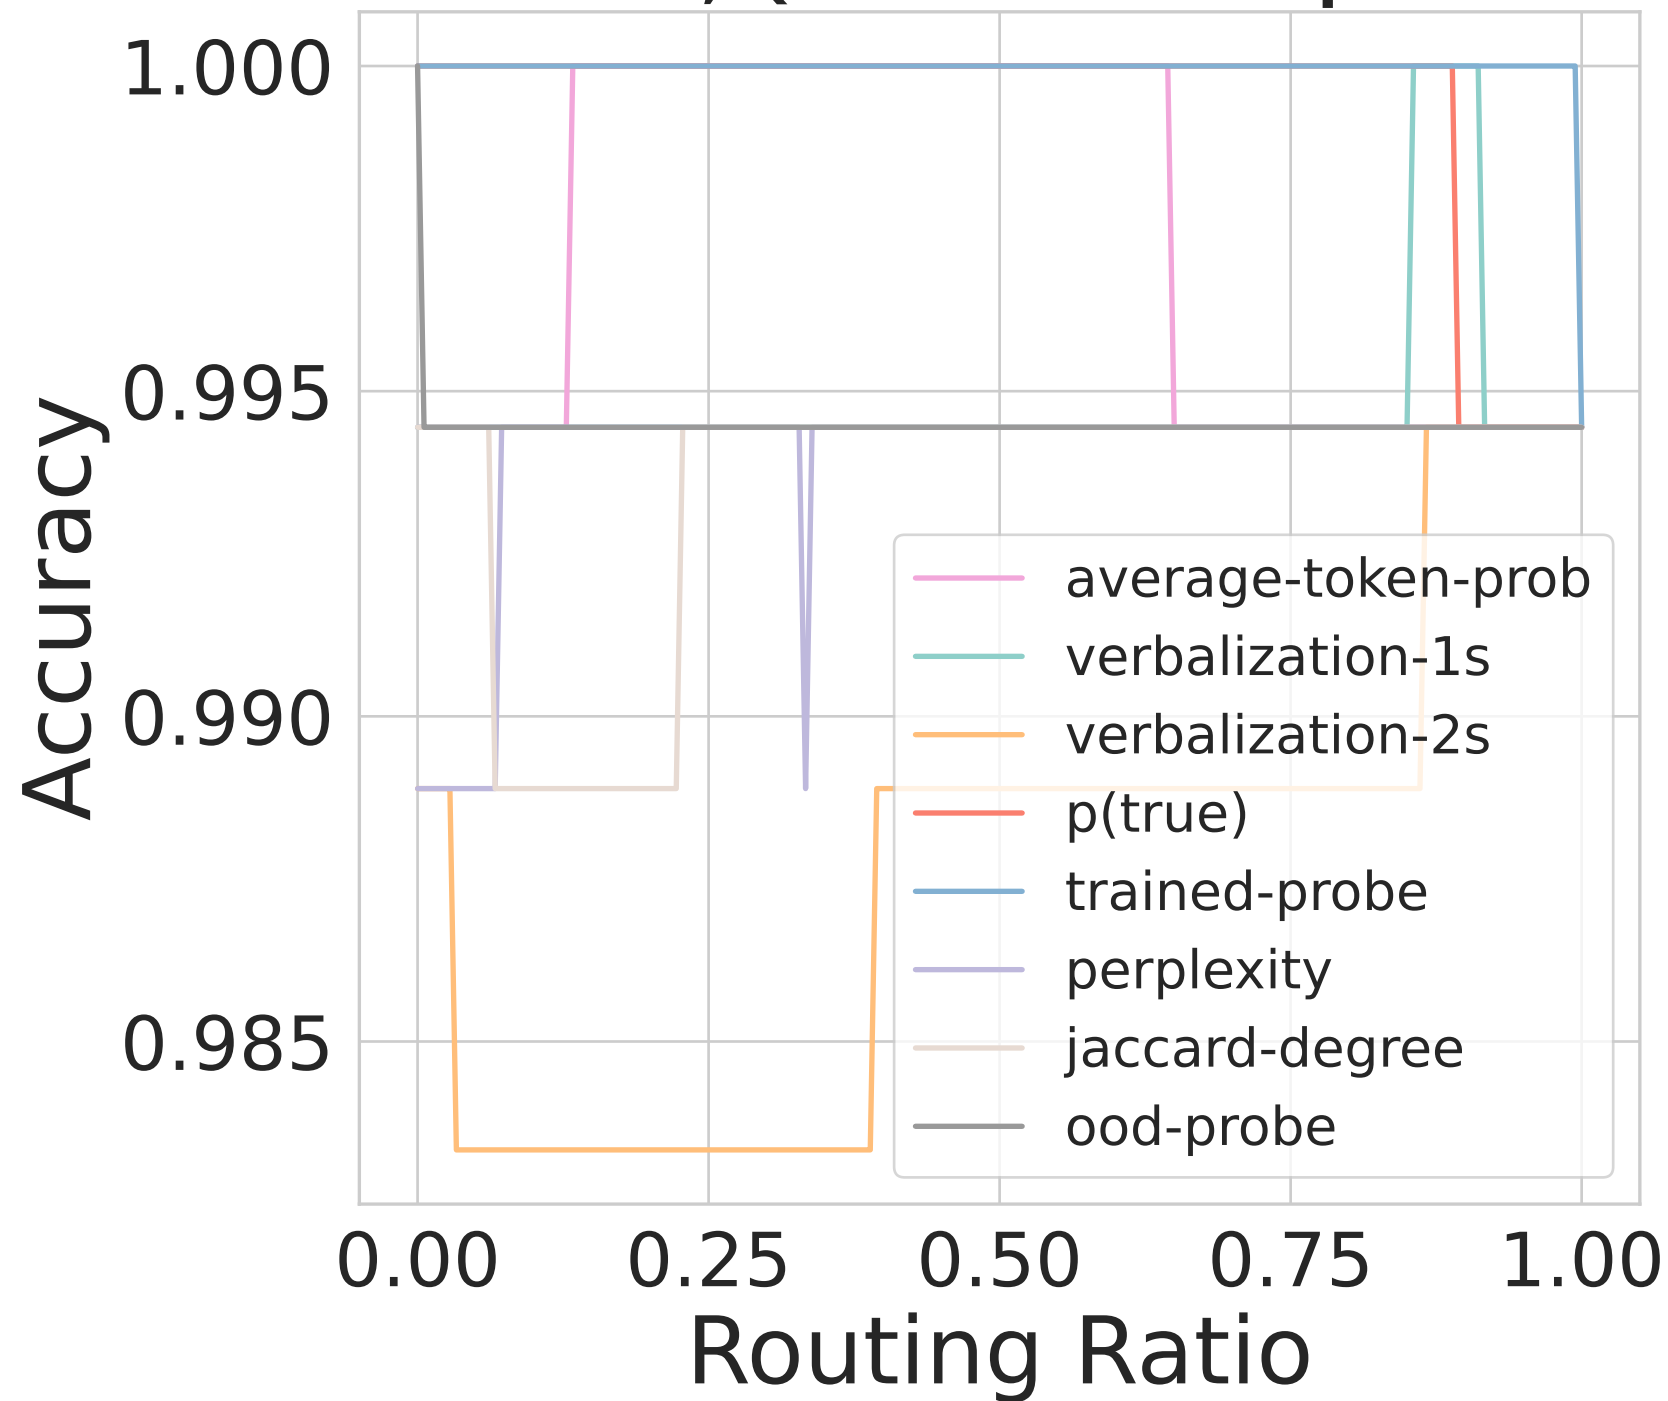

Supplement: supplementary_material [file rr_acc_multiarith_Qwen3-4B_dsR1.pdf › Routing_SLM_LLMs/Uncertainty-based Routing/w_legend/to_dsR1/rr_acc_multiarith_Qwen3-4B_dsR1.pdf]
