# Supplementary material (part 13 of 14)
Source: ML conference proceedings conference paper supplement (https://openreview.net/forum?id=smdbra3VEi)

# BoolQ, llama-3.2-1b to Qwen3-32B

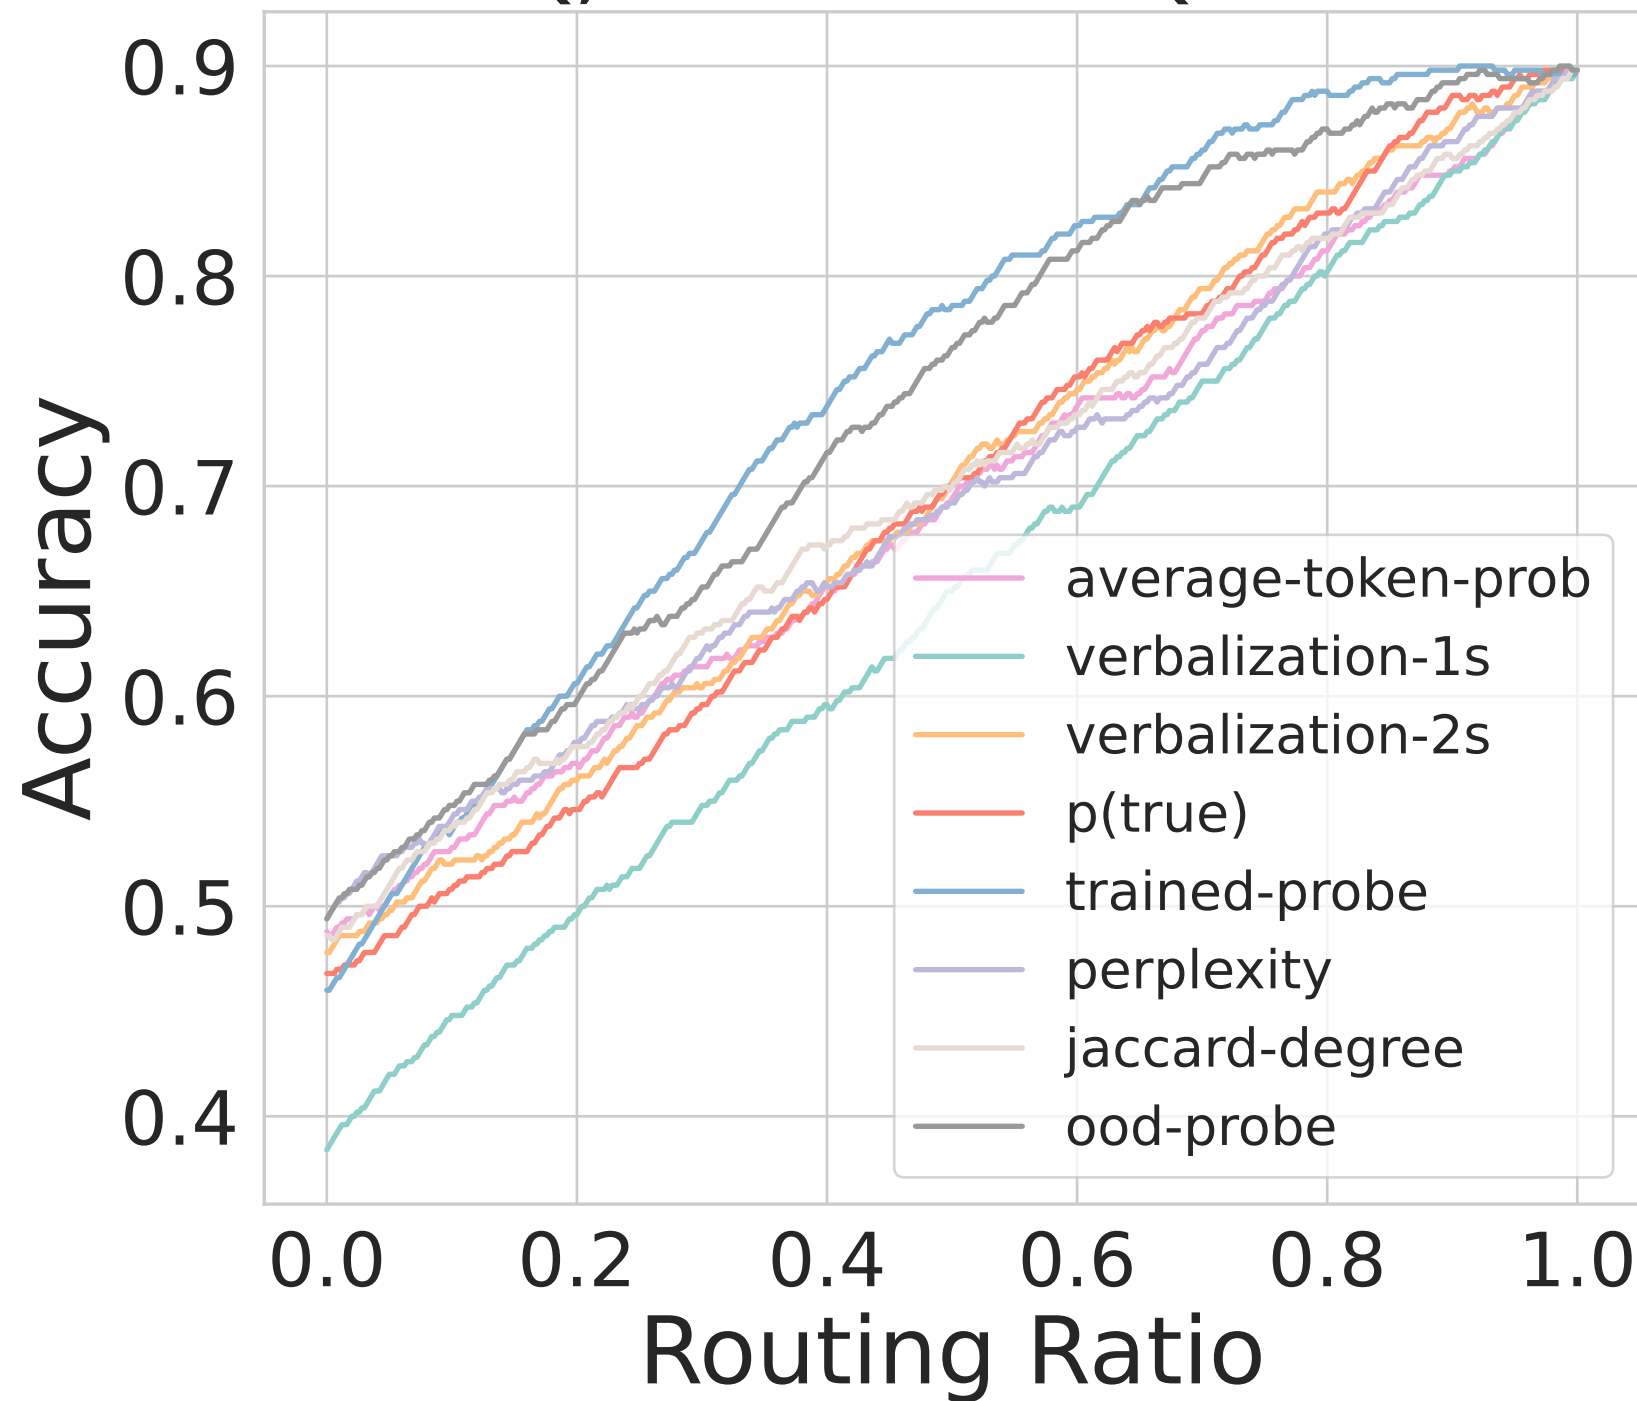

Supplement: supplementary_material [file rr_acc_boolq_llama-3.2-1b_qwen32.pdf › Routing_SLM_LLMs/Uncertainty-based Routing/w_legend/to_qwen32/rr_acc_boolq_llama-3.2-1b_qwen32.pdf]

# BoolQ, llama-3.2-3b to Qwen3-32B

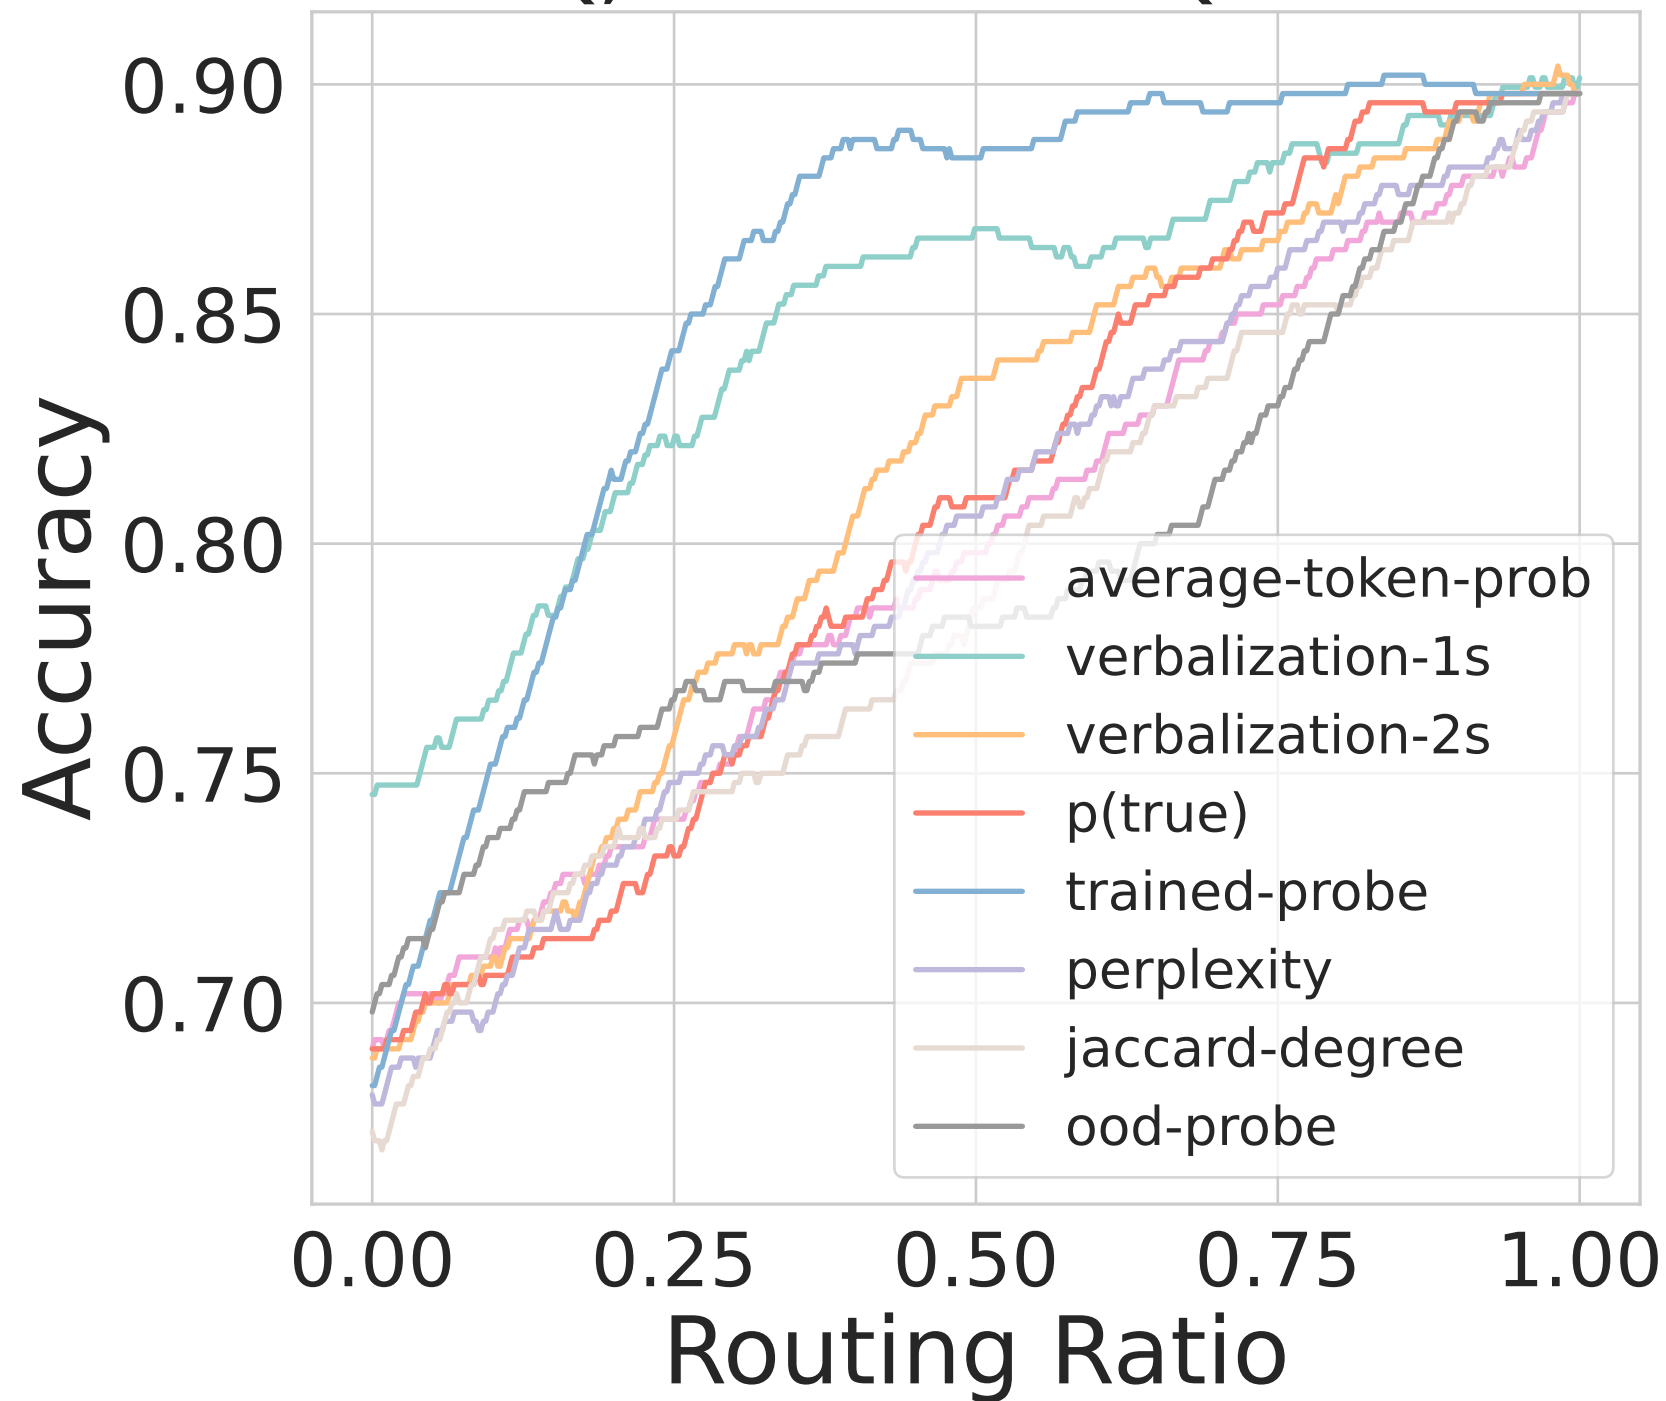

Supplement: supplementary_material [file rr_acc_boolq_llama-3.2-3b_qwen32.pdf › Routing_SLM_LLMs/Uncertainty-based Routing/w_legend/to_qwen32/rr_acc_boolq_llama-3.2-3b_qwen32.pdf]

**BoolQ, mistral-7b to Qwen3-32B**

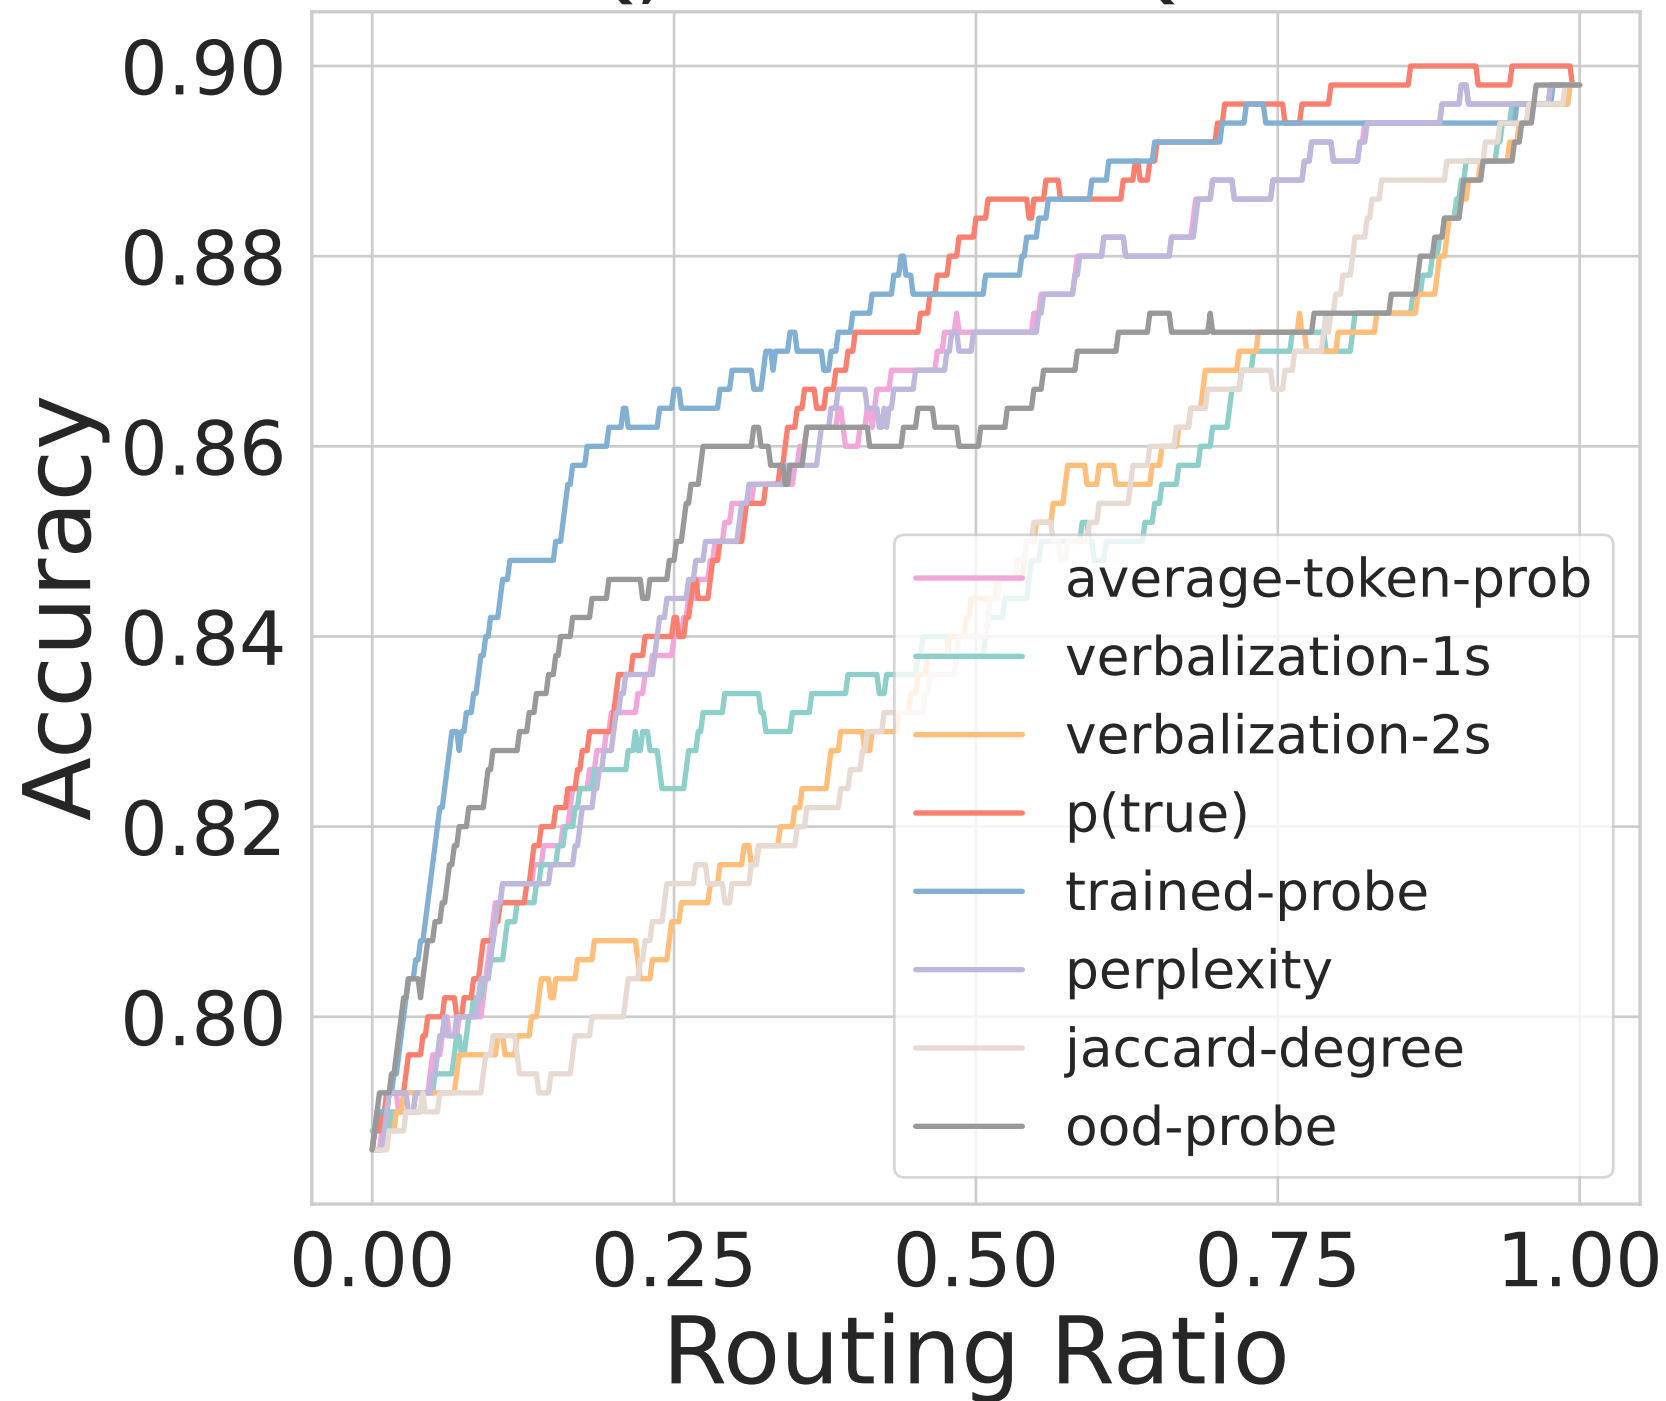

Supplement: supplementary_material [file rr_acc_boolq_mistral-7b_qwen32.pdf › Routing_SLM_LLMs/Uncertainty-based Routing/w_legend/to_qwen32/rr_acc_boolq_mistral-7b_qwen32.pdf]

**BoolQ, phi-3.5-mini to Qwen3-32B**

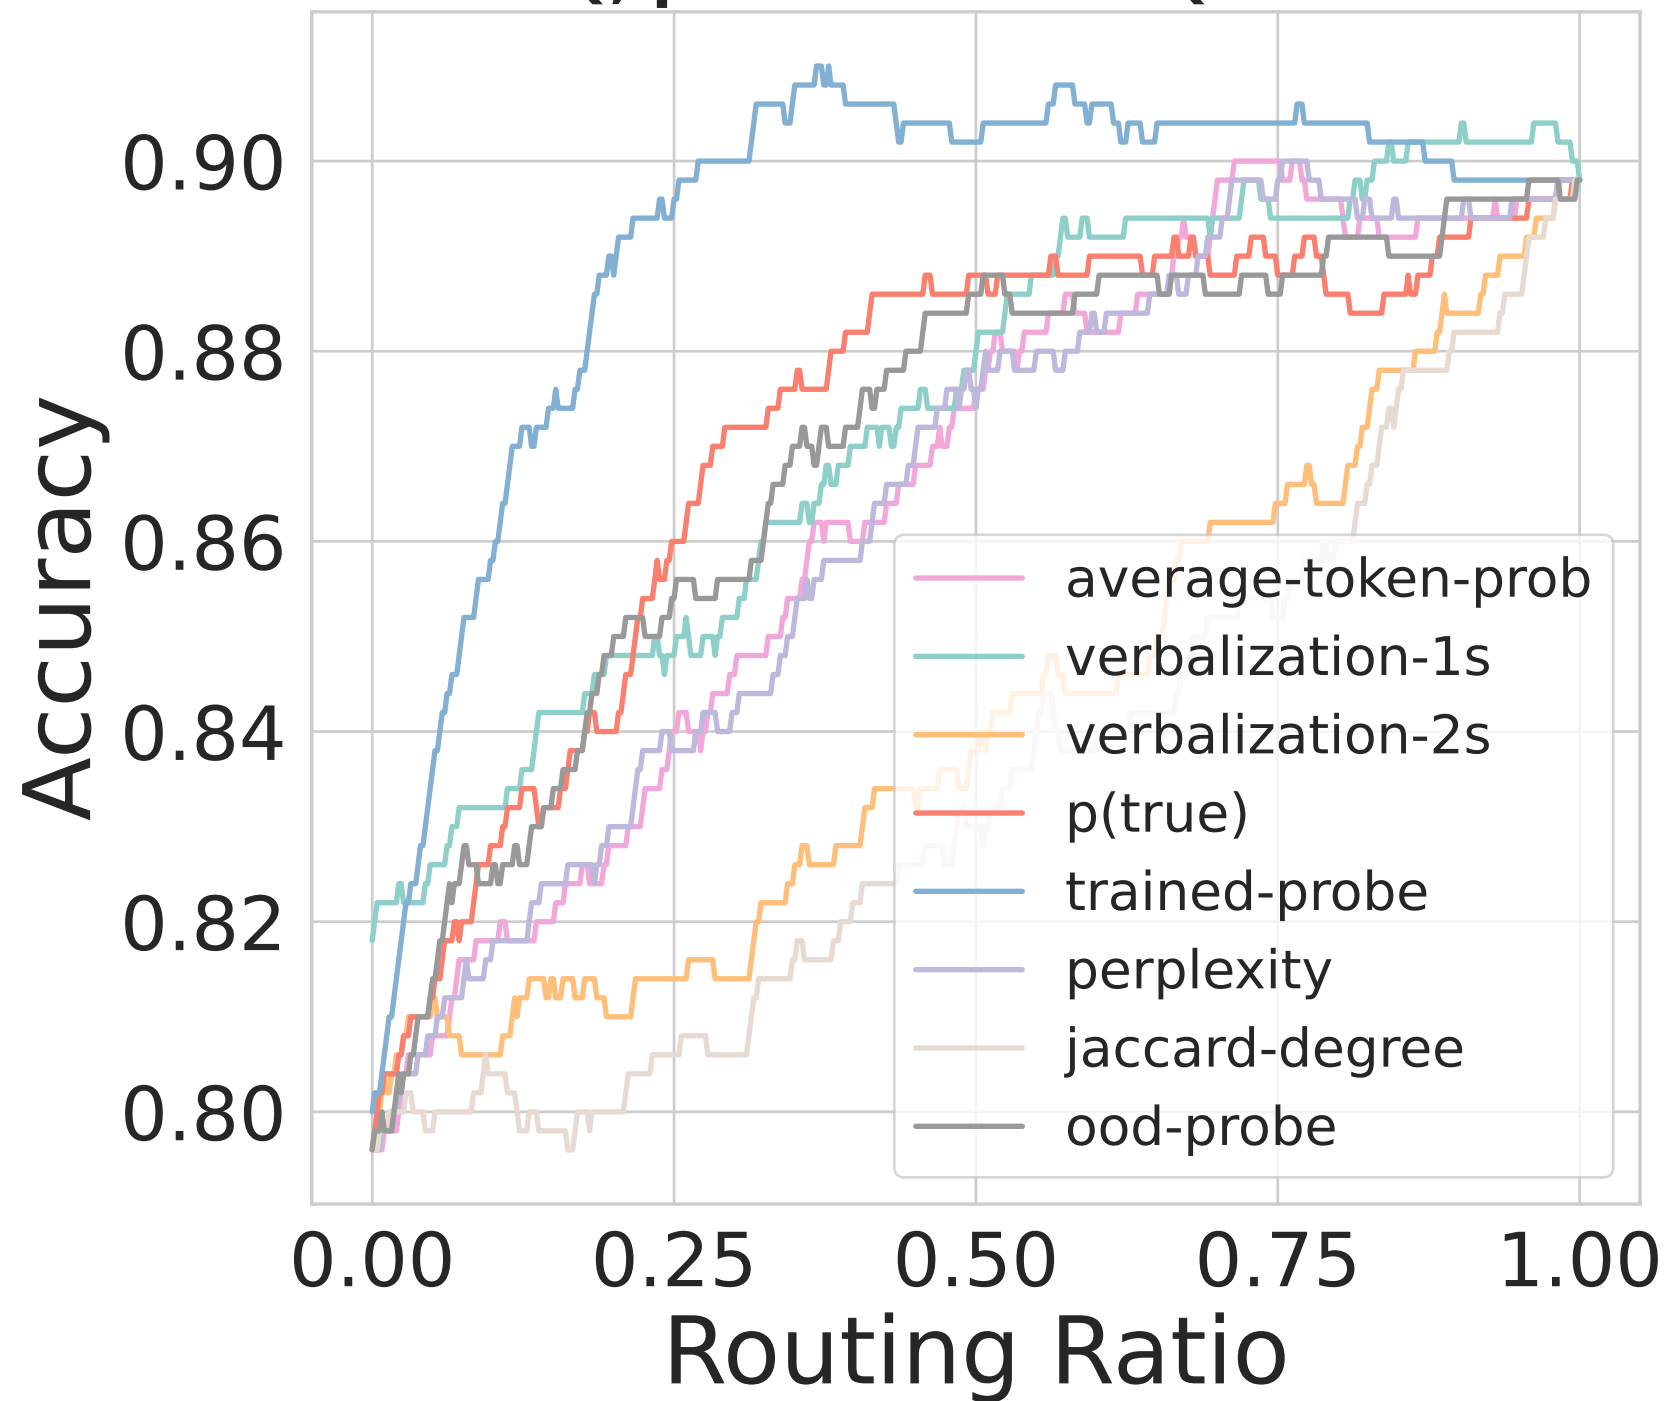

Supplement: supplementary_material [file rr_acc_boolq_phi-3.5-mini_qwen32.pdf › Routing_SLM_LLMs/Uncertainty-based Routing/w_legend/to_qwen32/rr_acc_boolq_phi-3.5-mini_qwen32.pdf]

## BoolQ, phi-4-mini-reasoning to Qwen3-32B

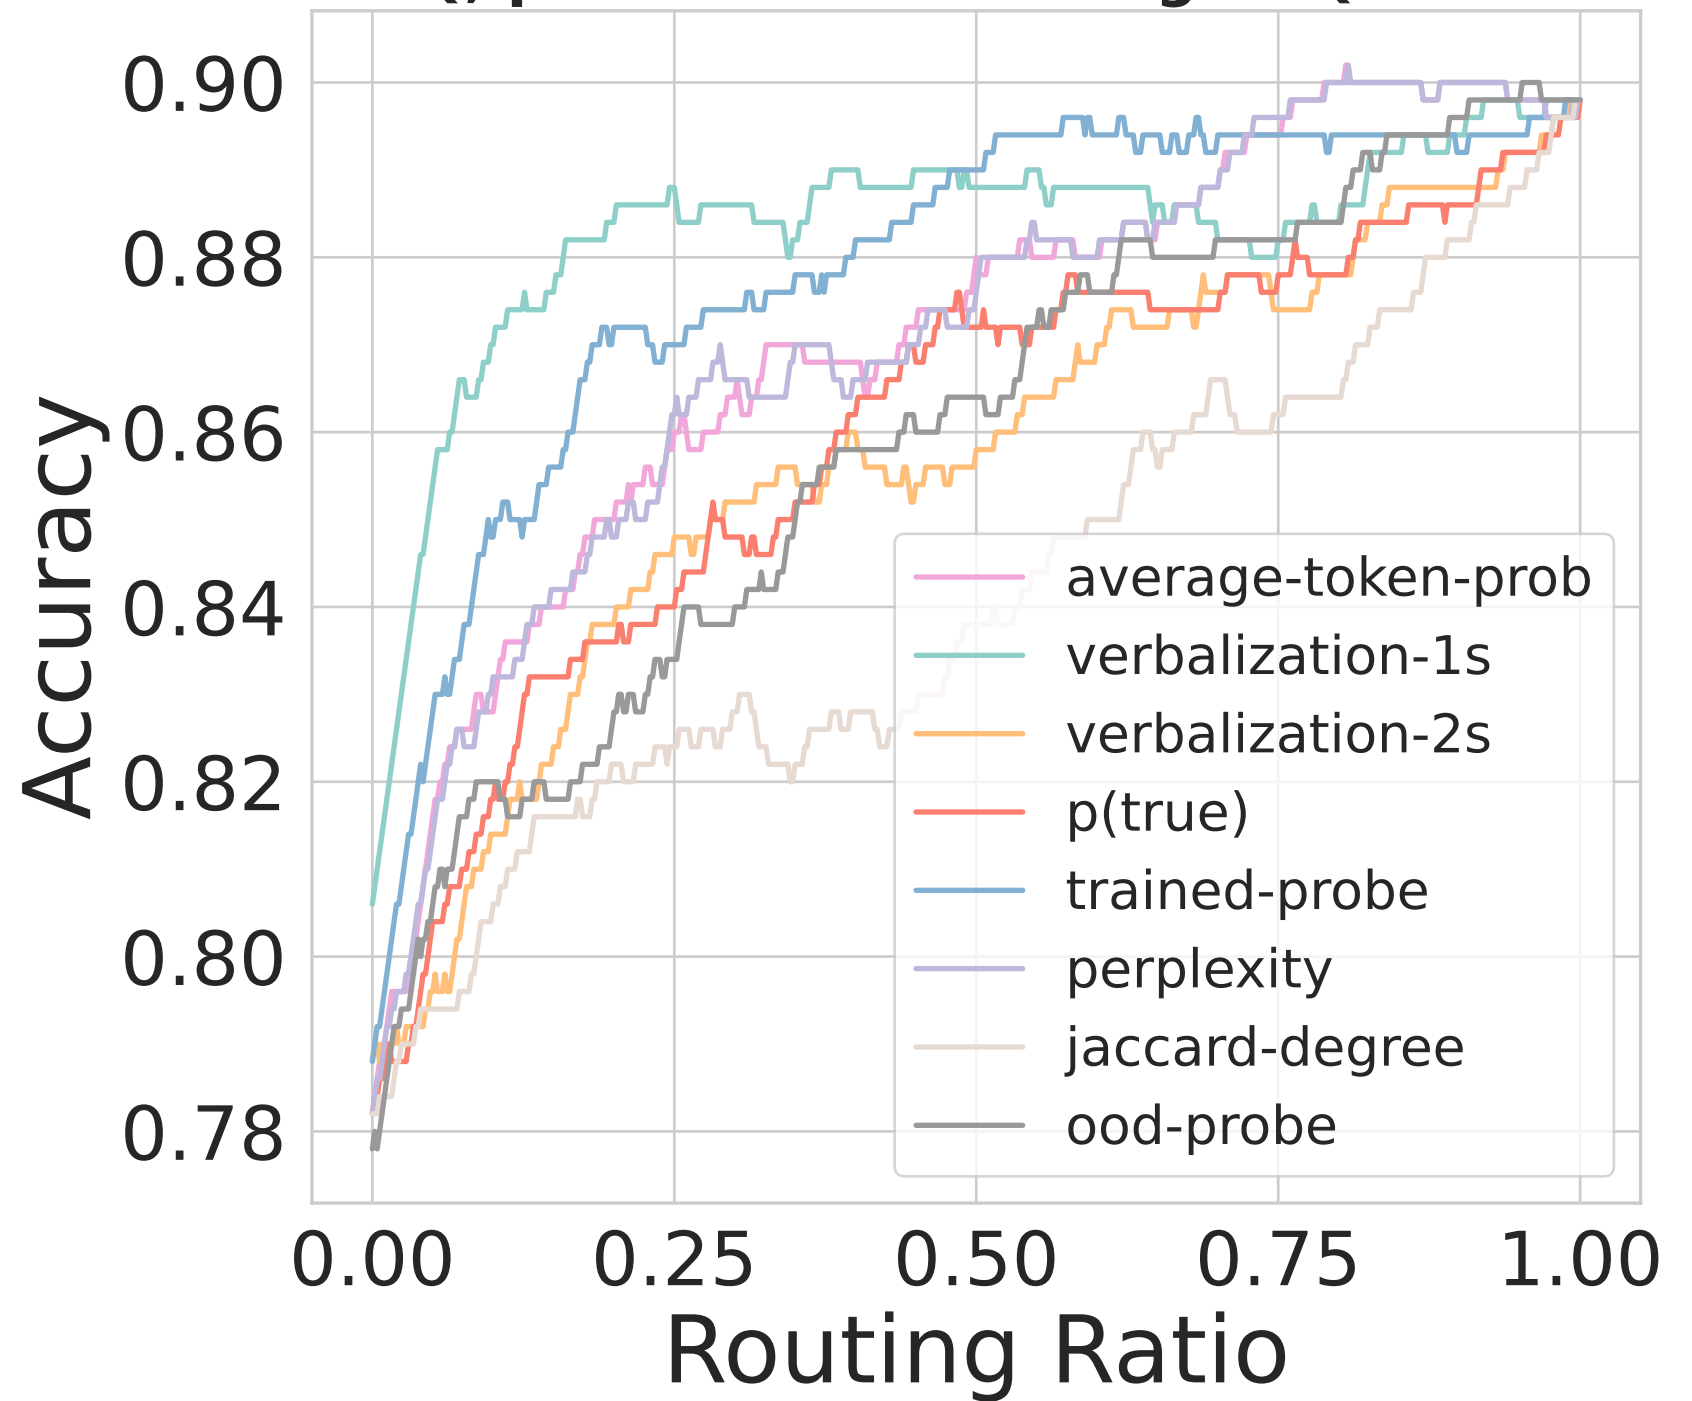

Supplement: supplementary_material [file rr_acc_boolq_phi-4-mini-reasoning_qwen32.pdf › Routing_SLM_LLMs/Uncertainty-based Routing/w_legend/to_qwen32/rr_acc_boolq_phi-4-mini-reasoning_qwen32.pdf]

# BoolQ, qwen-2.5-7b to Qwen3-32B

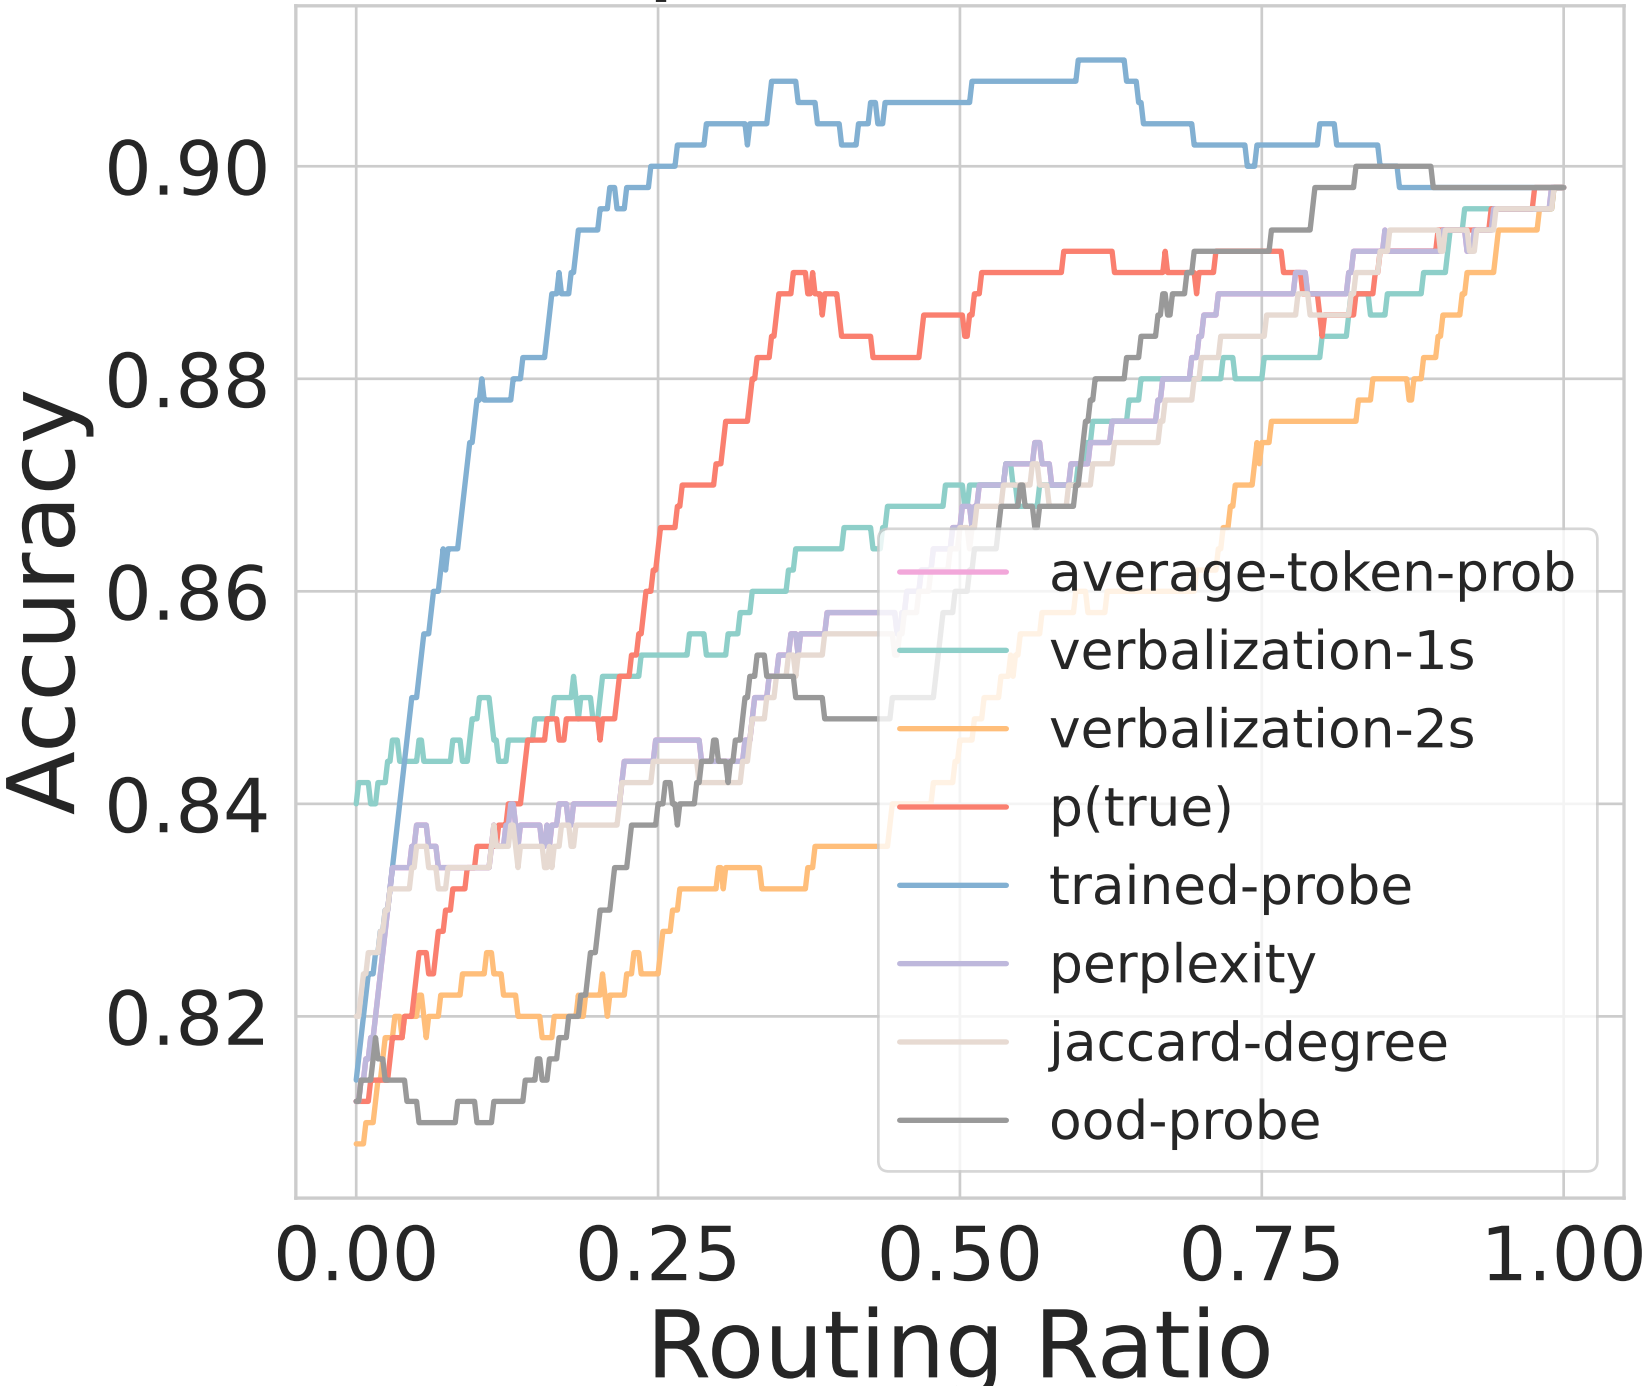

Supplement: supplementary_material [file rr_acc_boolq_qwen-2.5-7b_qwen32.pdf › Routing_SLM_LLMs/Uncertainty-based Routing/w_legend/to_qwen32/rr_acc_boolq_qwen-2.5-7b_qwen32.pdf]

# BoolQ, rwkv to Qwen3-32B

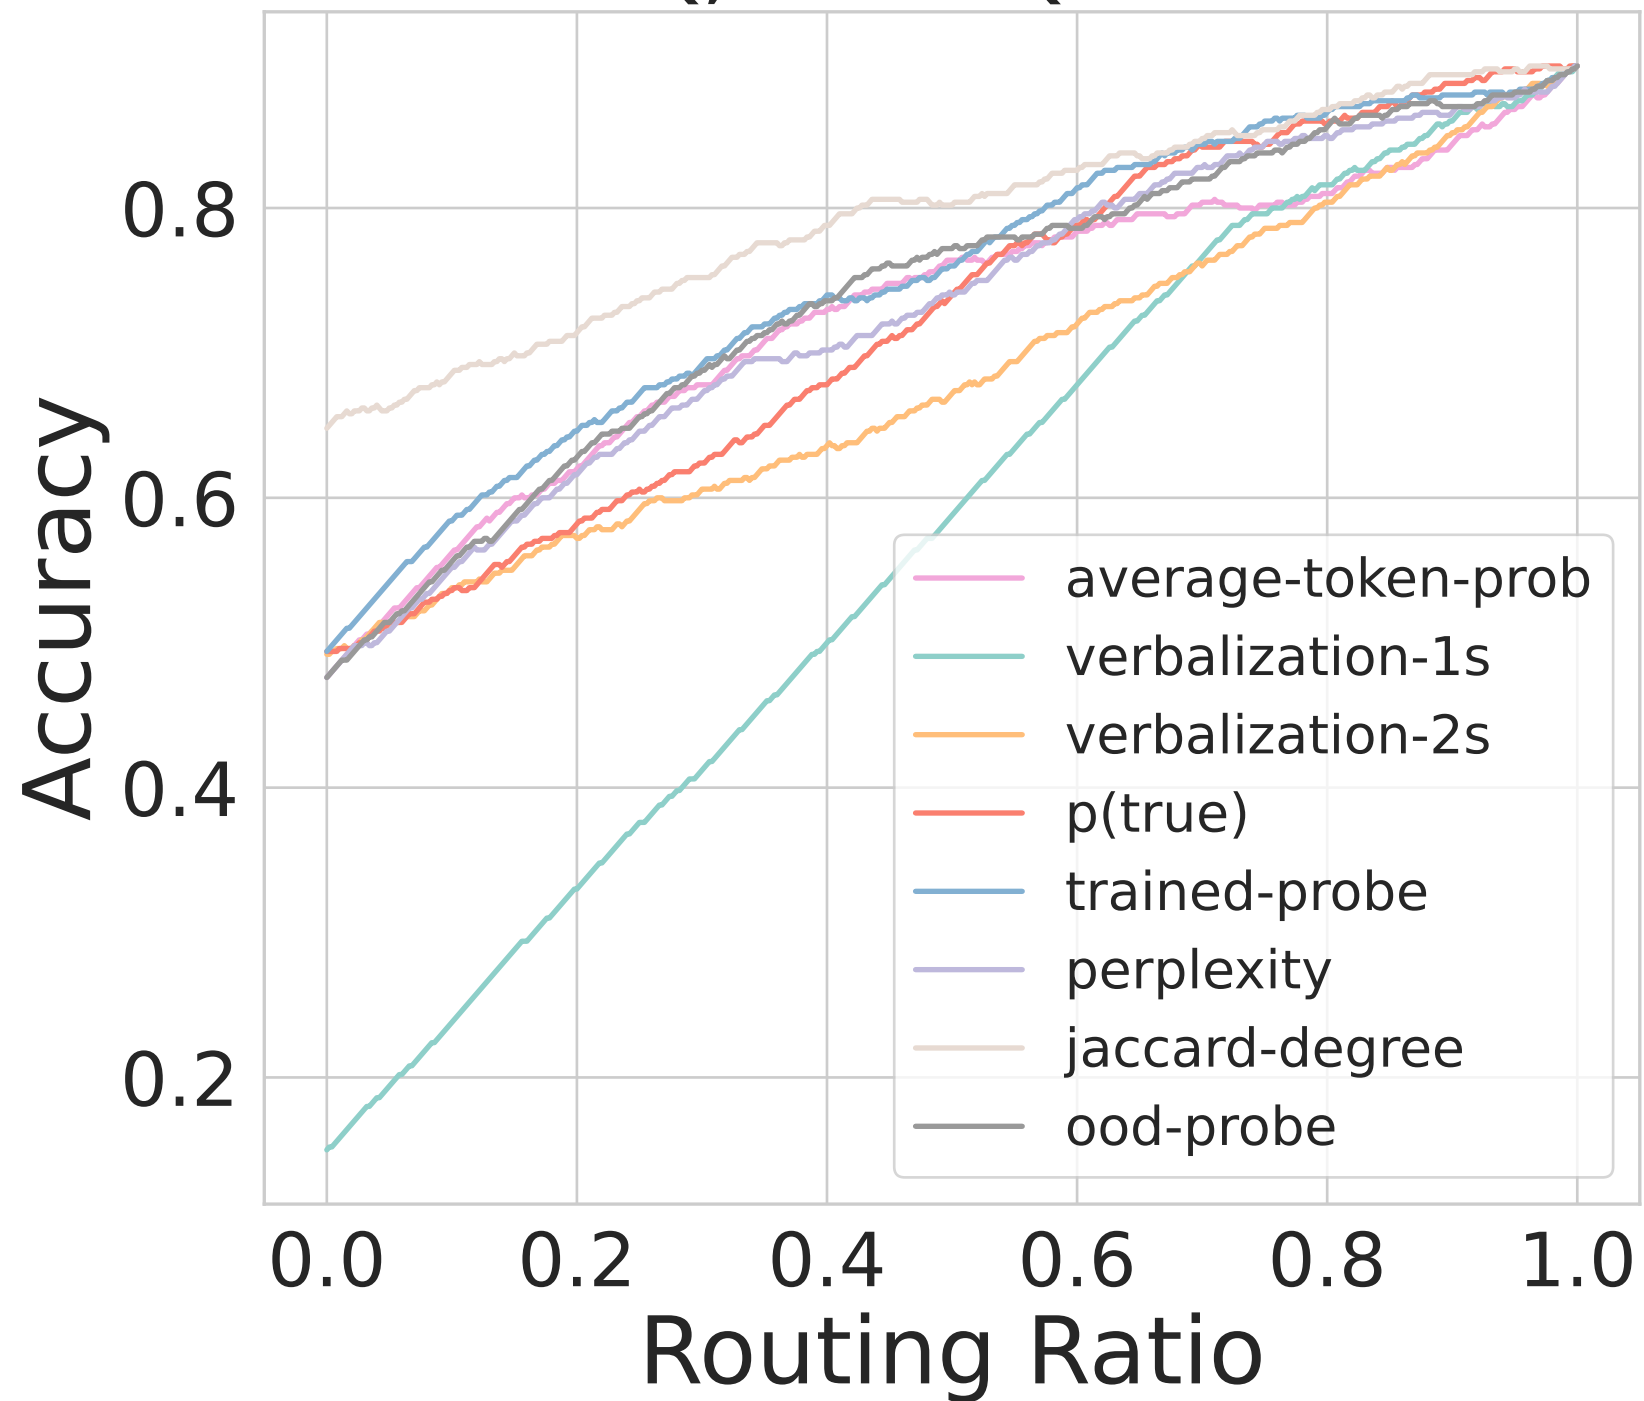

Supplement: supplementary_material [file rr_acc_boolq_rwkv_qwen32.pdf › Routing_SLM_LLMs/Uncertainty-based Routing/w_legend/to_qwen32/rr_acc_boolq_rwkv_qwen32.pdf]

## CoQA, Qwen3-0.6B to Qwen3-32B

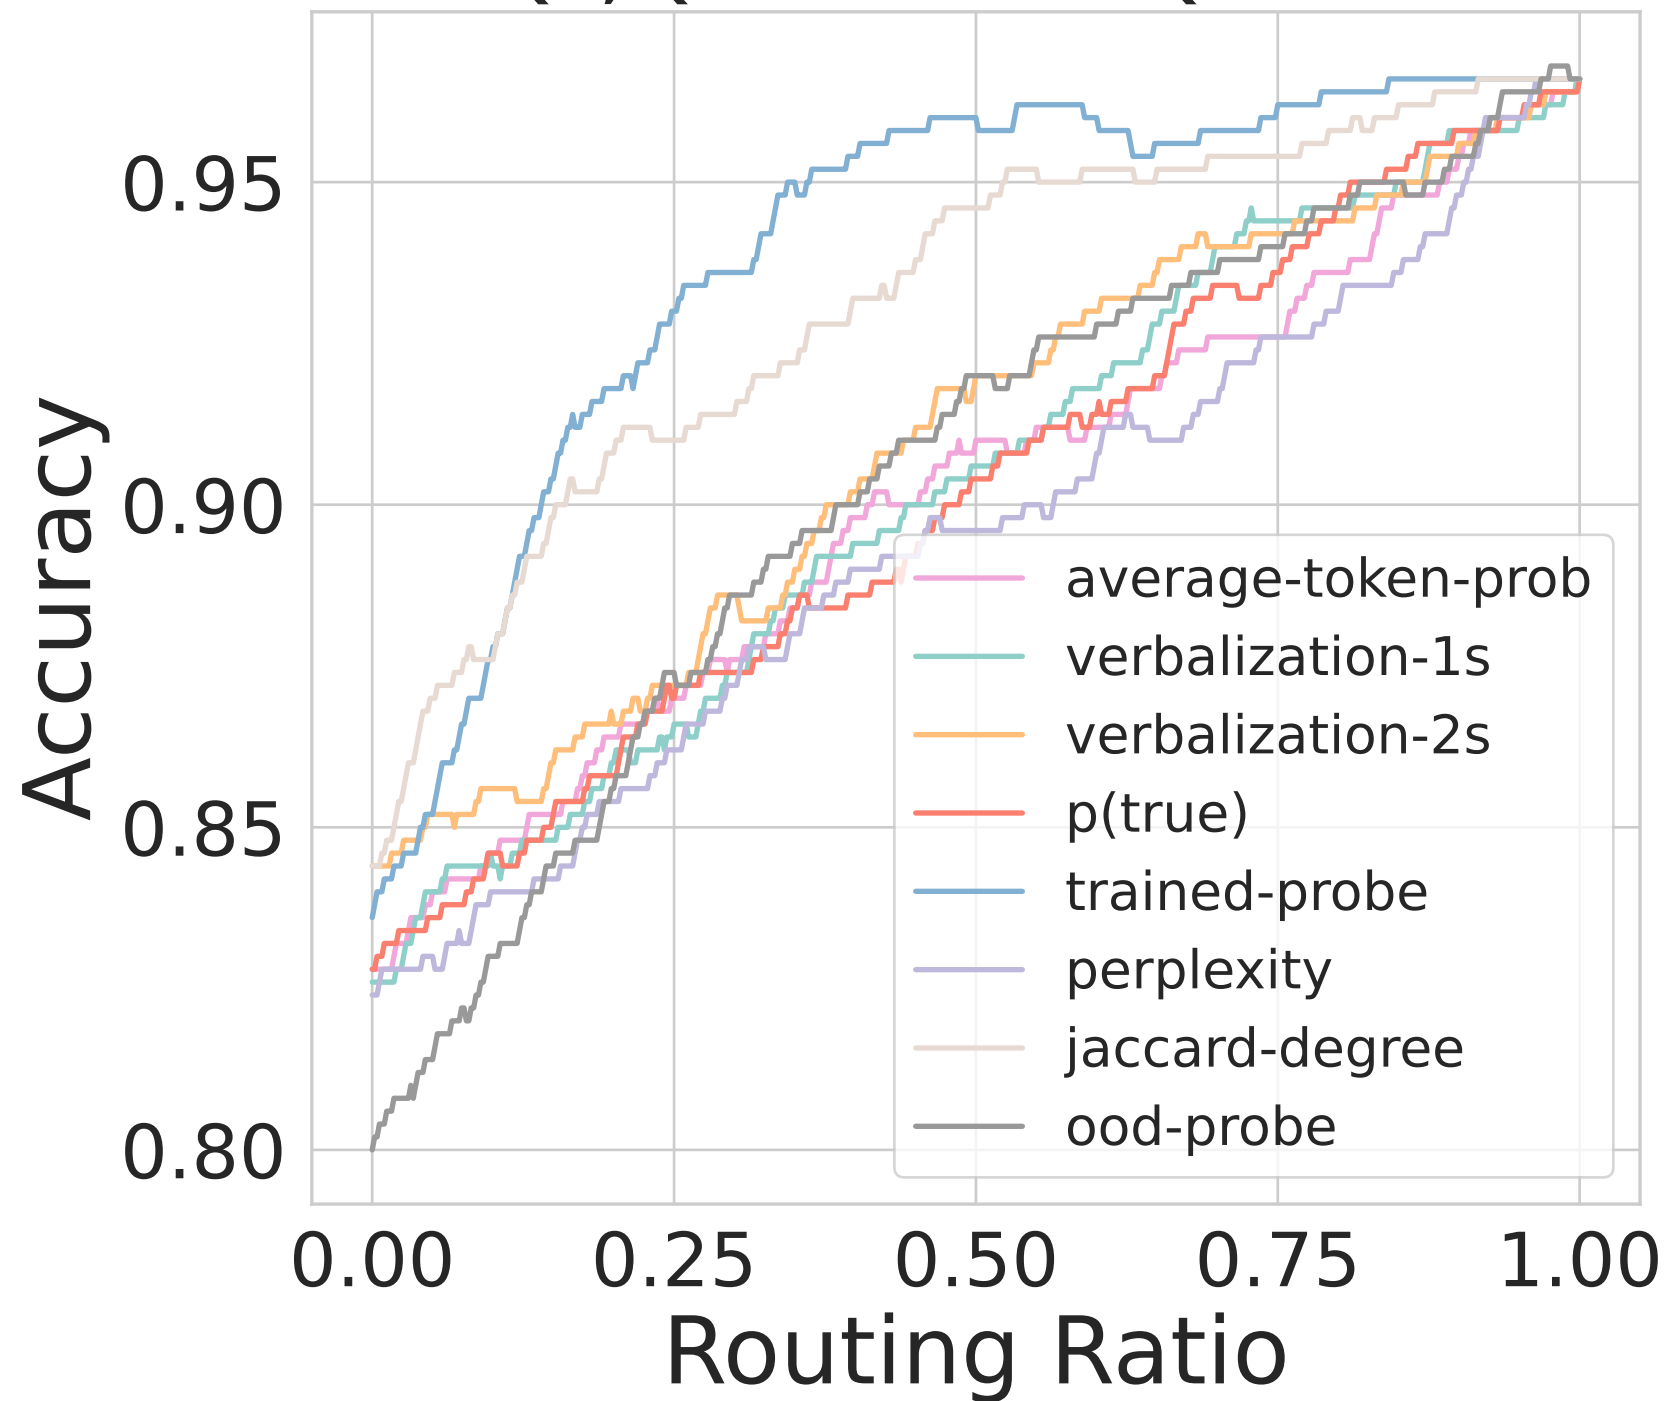

Supplement: supplementary_material [file rr_acc_co_qa_Qwen3-0.6B_qwen32.pdf › Routing_SLM_LLMs/Uncertainty-based Routing/w_legend/to_qwen32/rr_acc_co_qa_Qwen3-0.6B_qwen32.pdf]

# CoQA, Qwen3-1.7B to Qwen3-32B

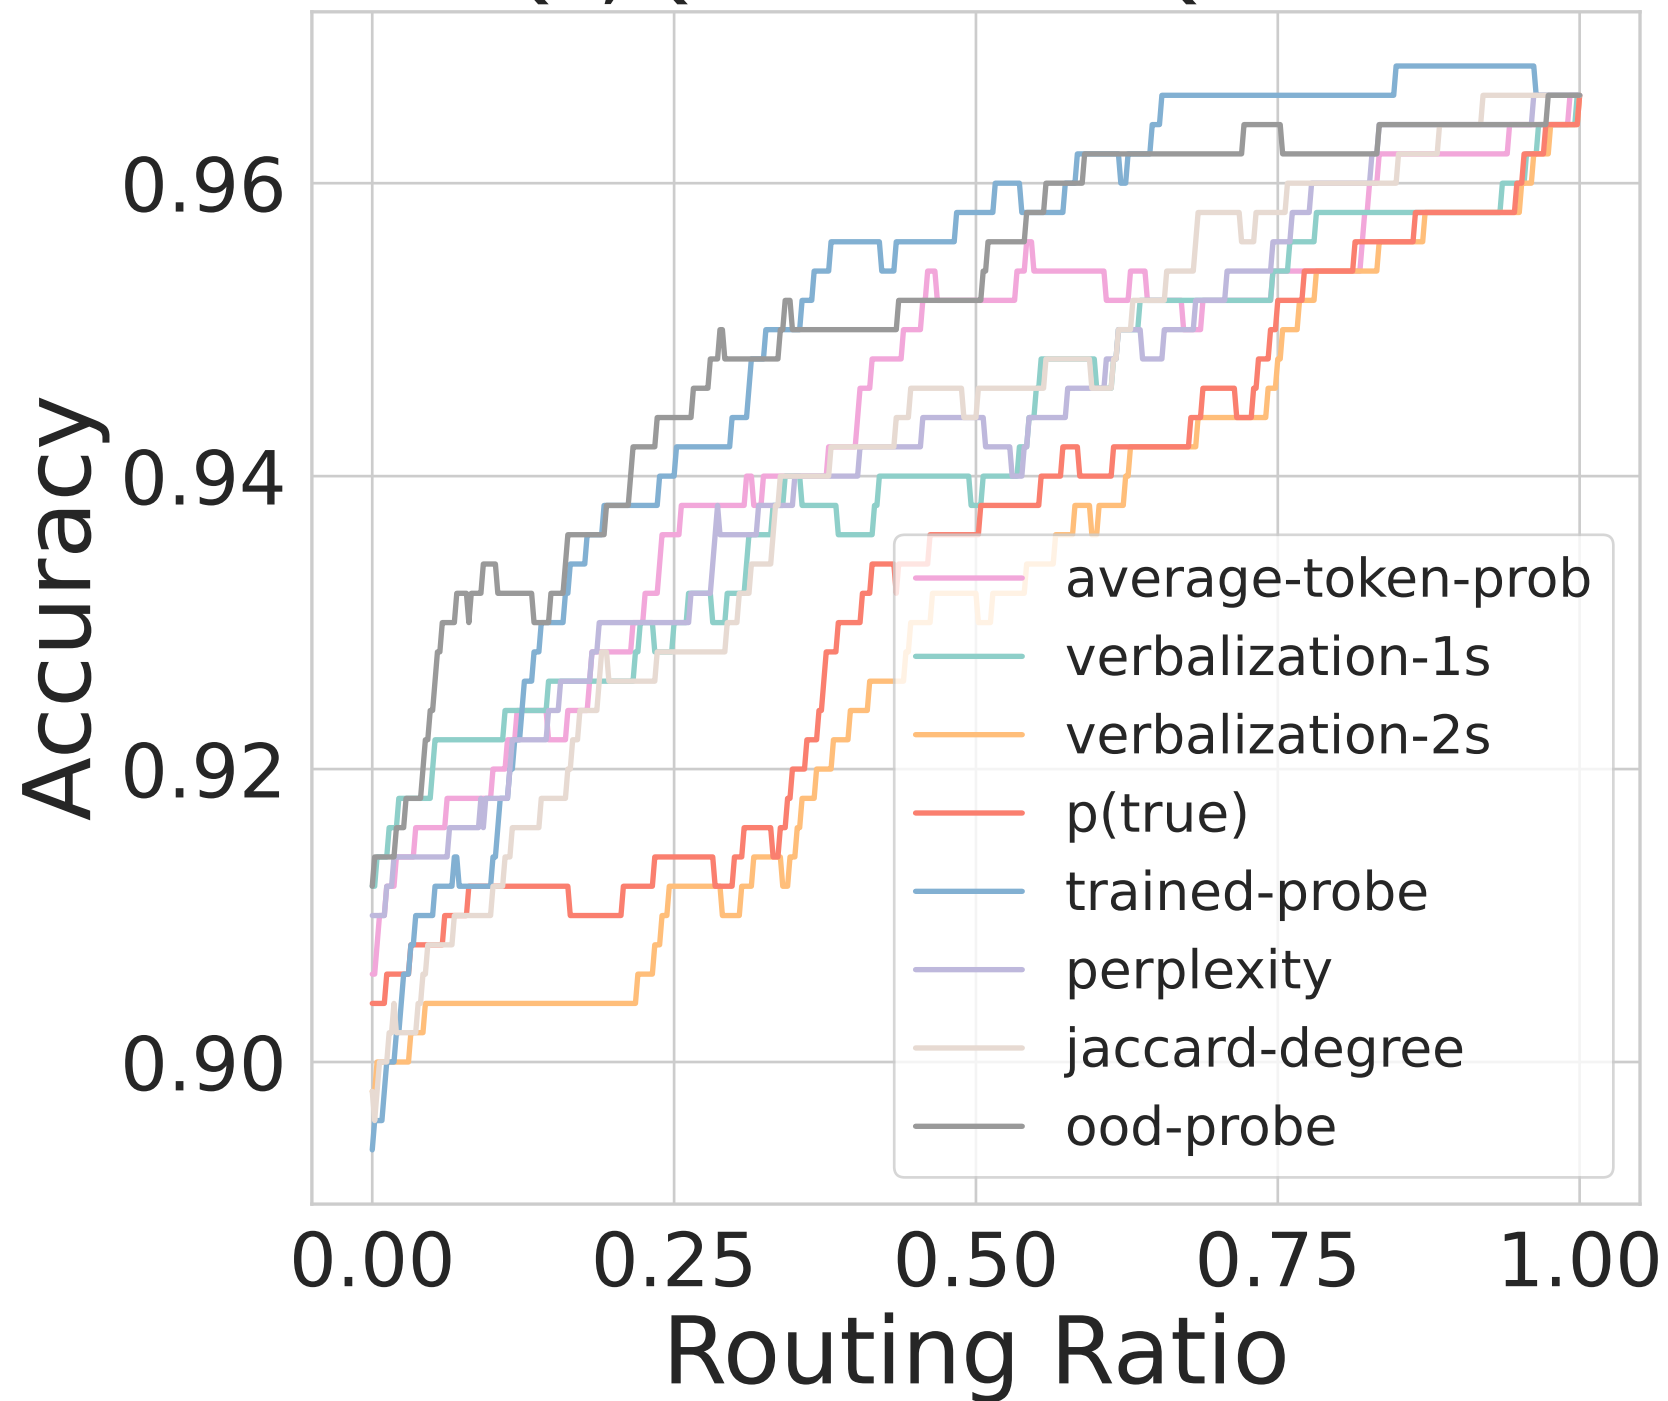

Supplement: supplementary_material [file rr_acc_co_qa_Qwen3-1.7B_qwen32.pdf › Routing_SLM_LLMs/Uncertainty-based Routing/w_legend/to_qwen32/rr_acc_co_qa_Qwen3-1.7B_qwen32.pdf]

**CoQA, Qwen3-4B to Qwen3-32B**

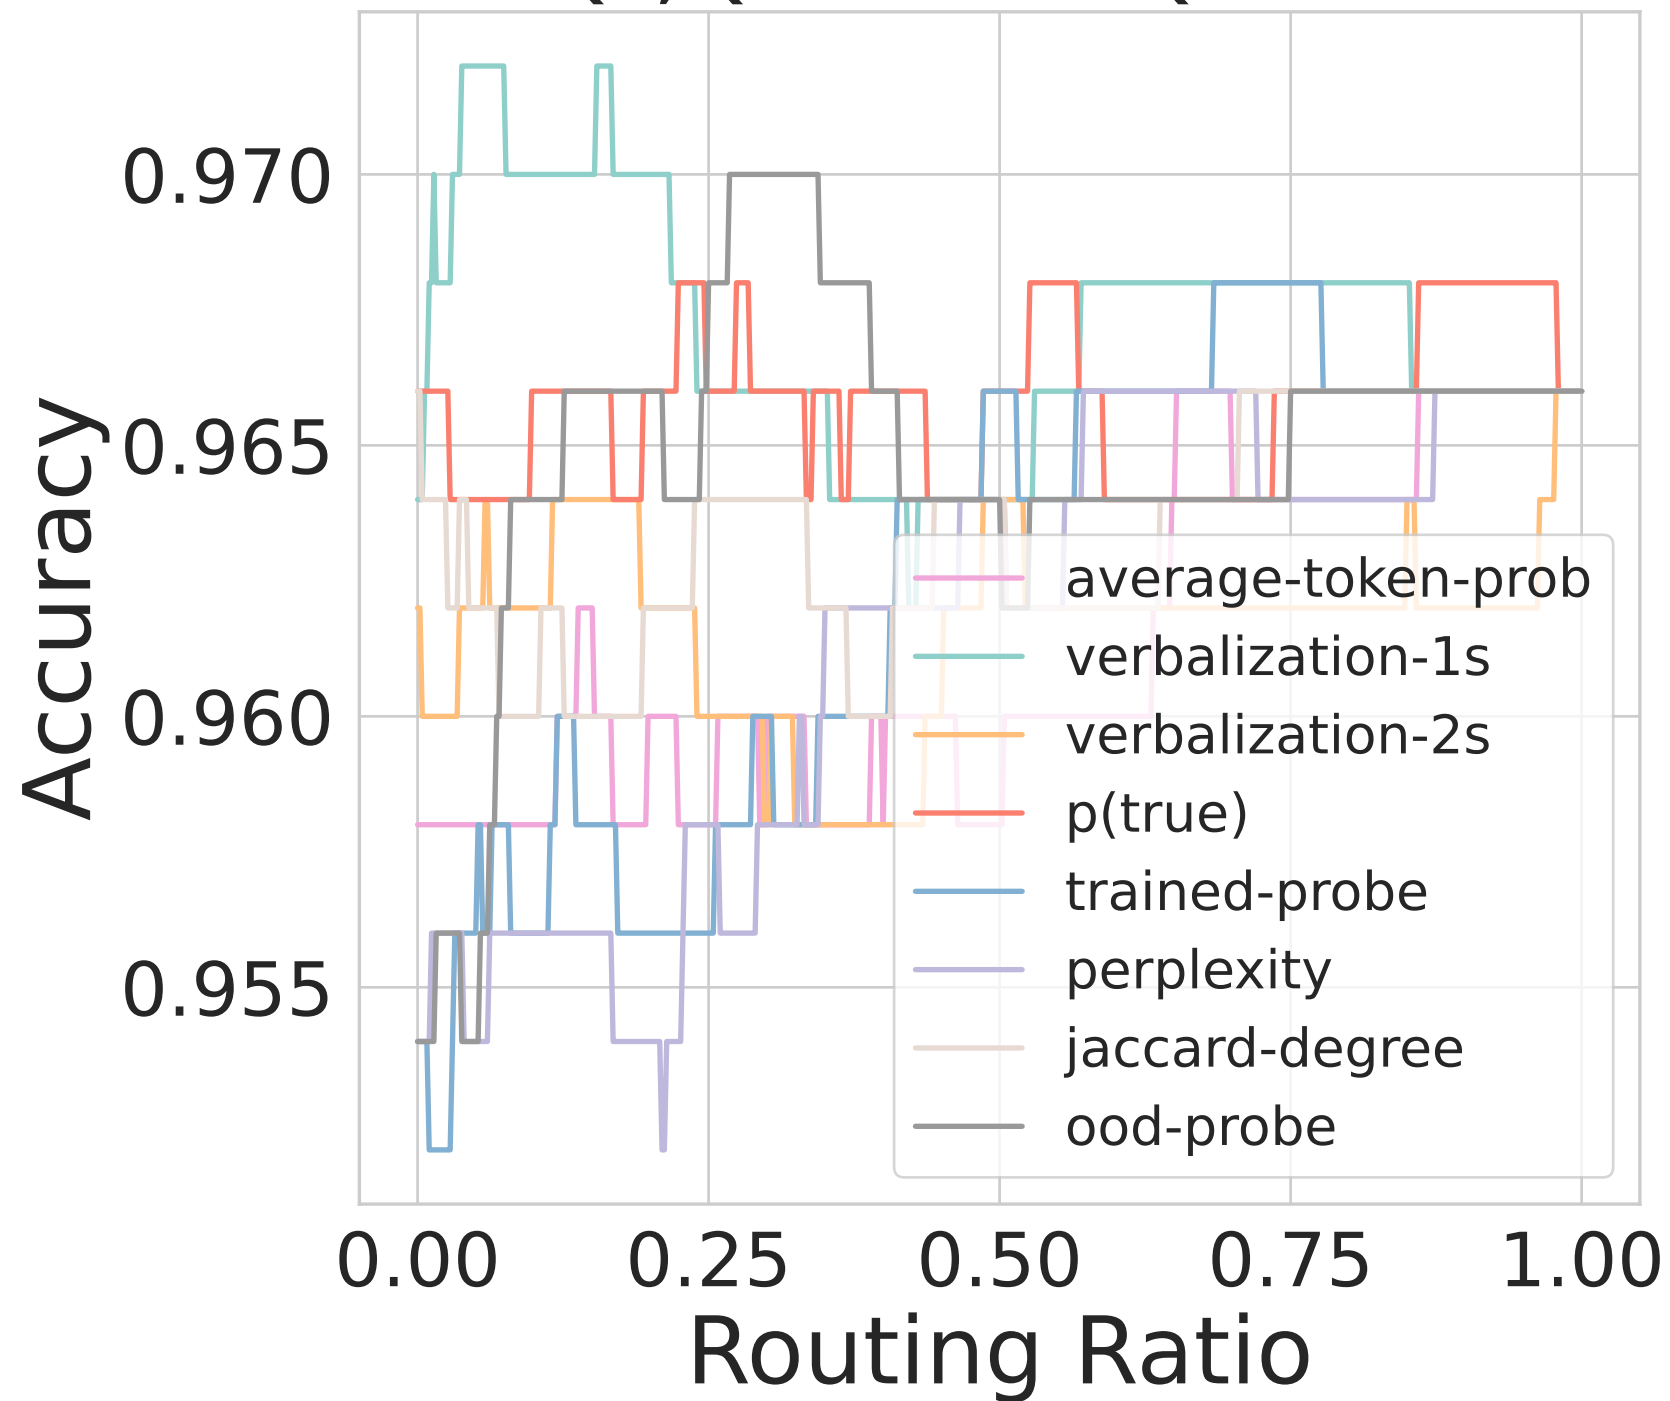

Supplement: supplementary_material [file rr_acc_co_qa_Qwen3-4B_qwen32.pdf › Routing_SLM_LLMs/Uncertainty-based Routing/w_legend/to_qwen32/rr_acc_co_qa_Qwen3-4B_qwen32.pdf]

CoQA, granite-3.1-8b to Qwen3-32B

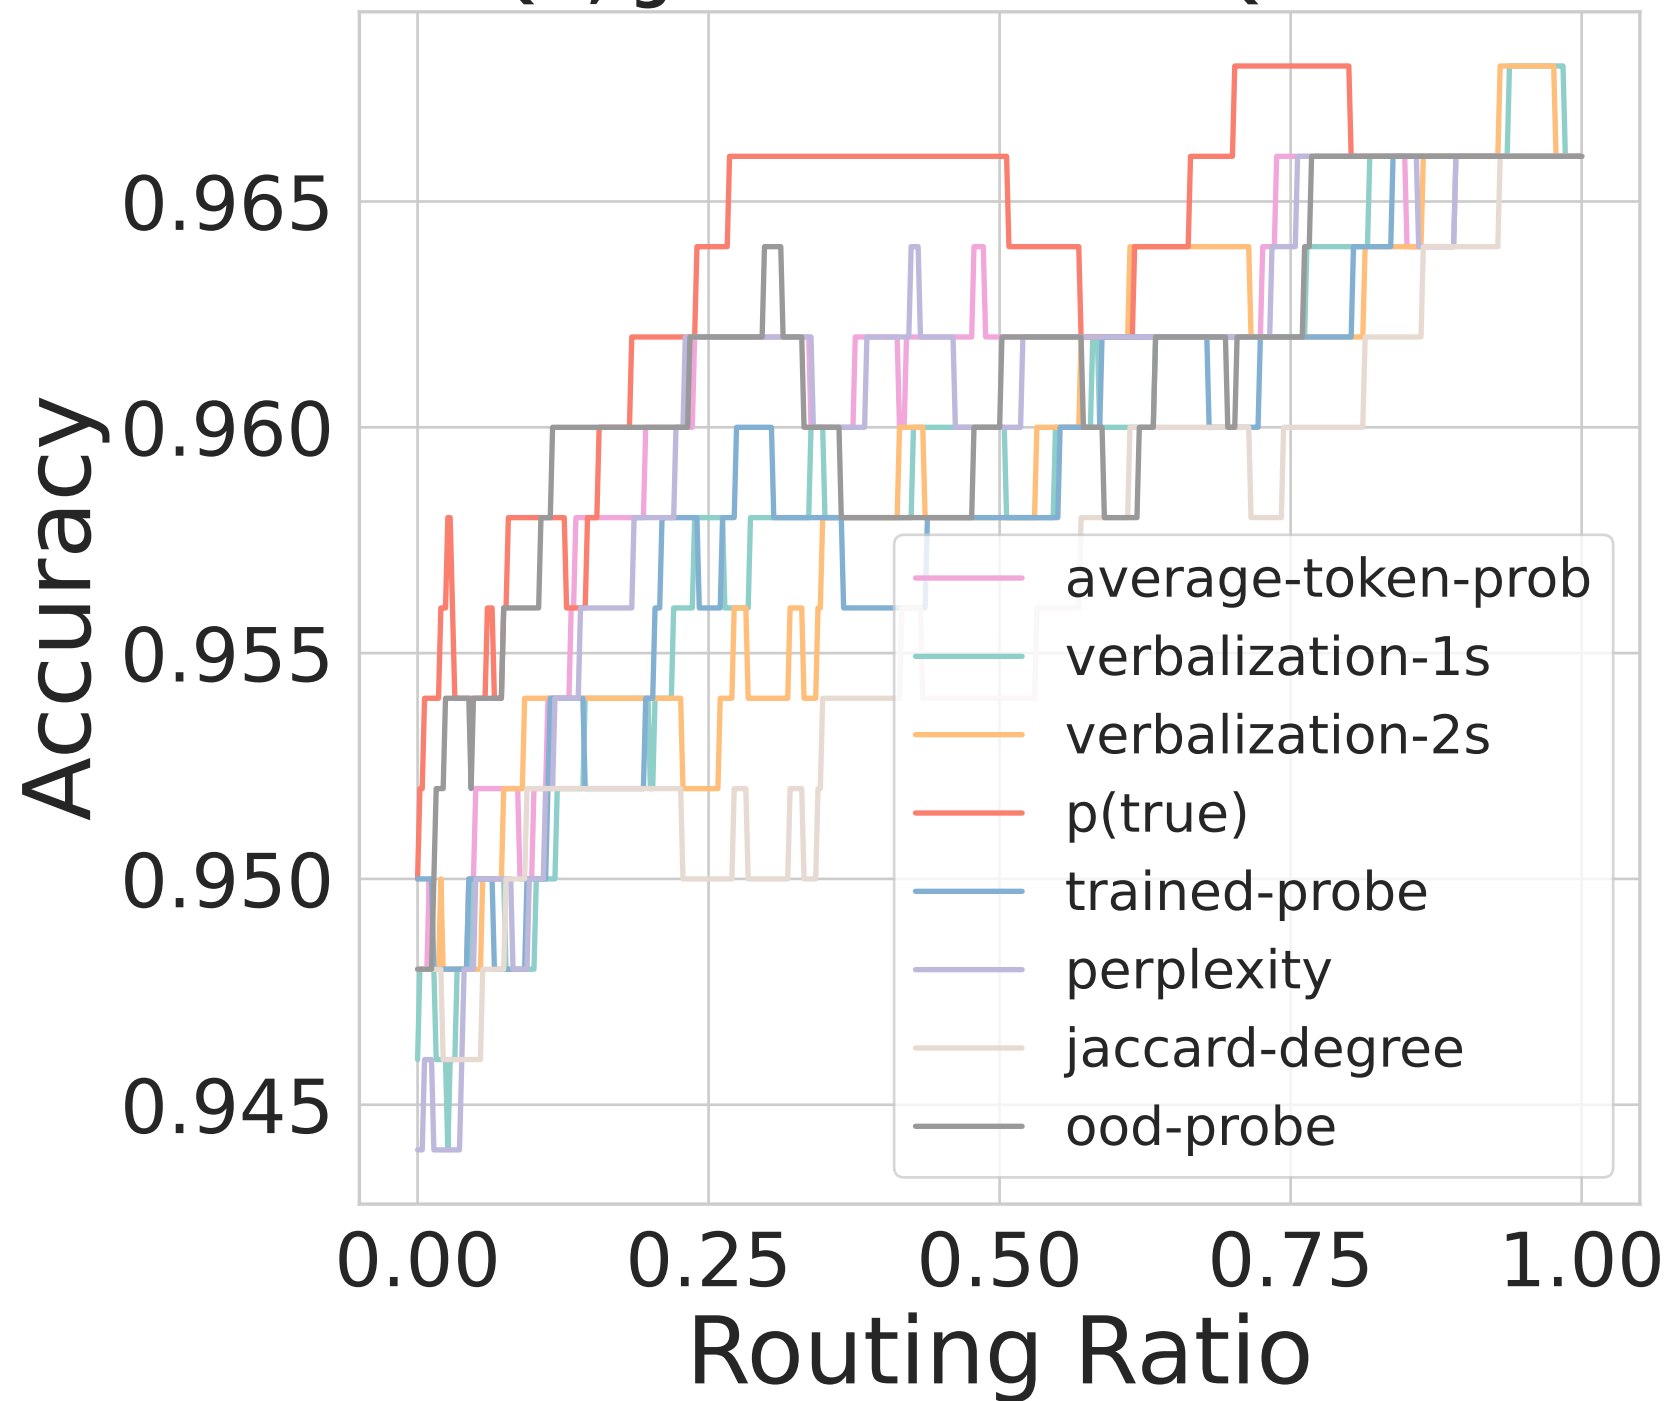

Supplement: supplementary_material [file rr_acc_co_qa_granite-3.1-8b_qwen32.pdf › Routing_SLM_LLMs/Uncertainty-based Routing/w_legend/to_qwen32/rr_acc_co_qa_granite-3.1-8b_qwen32.pdf]

CoQA, llama-3.1-8b to Qwen3-32B

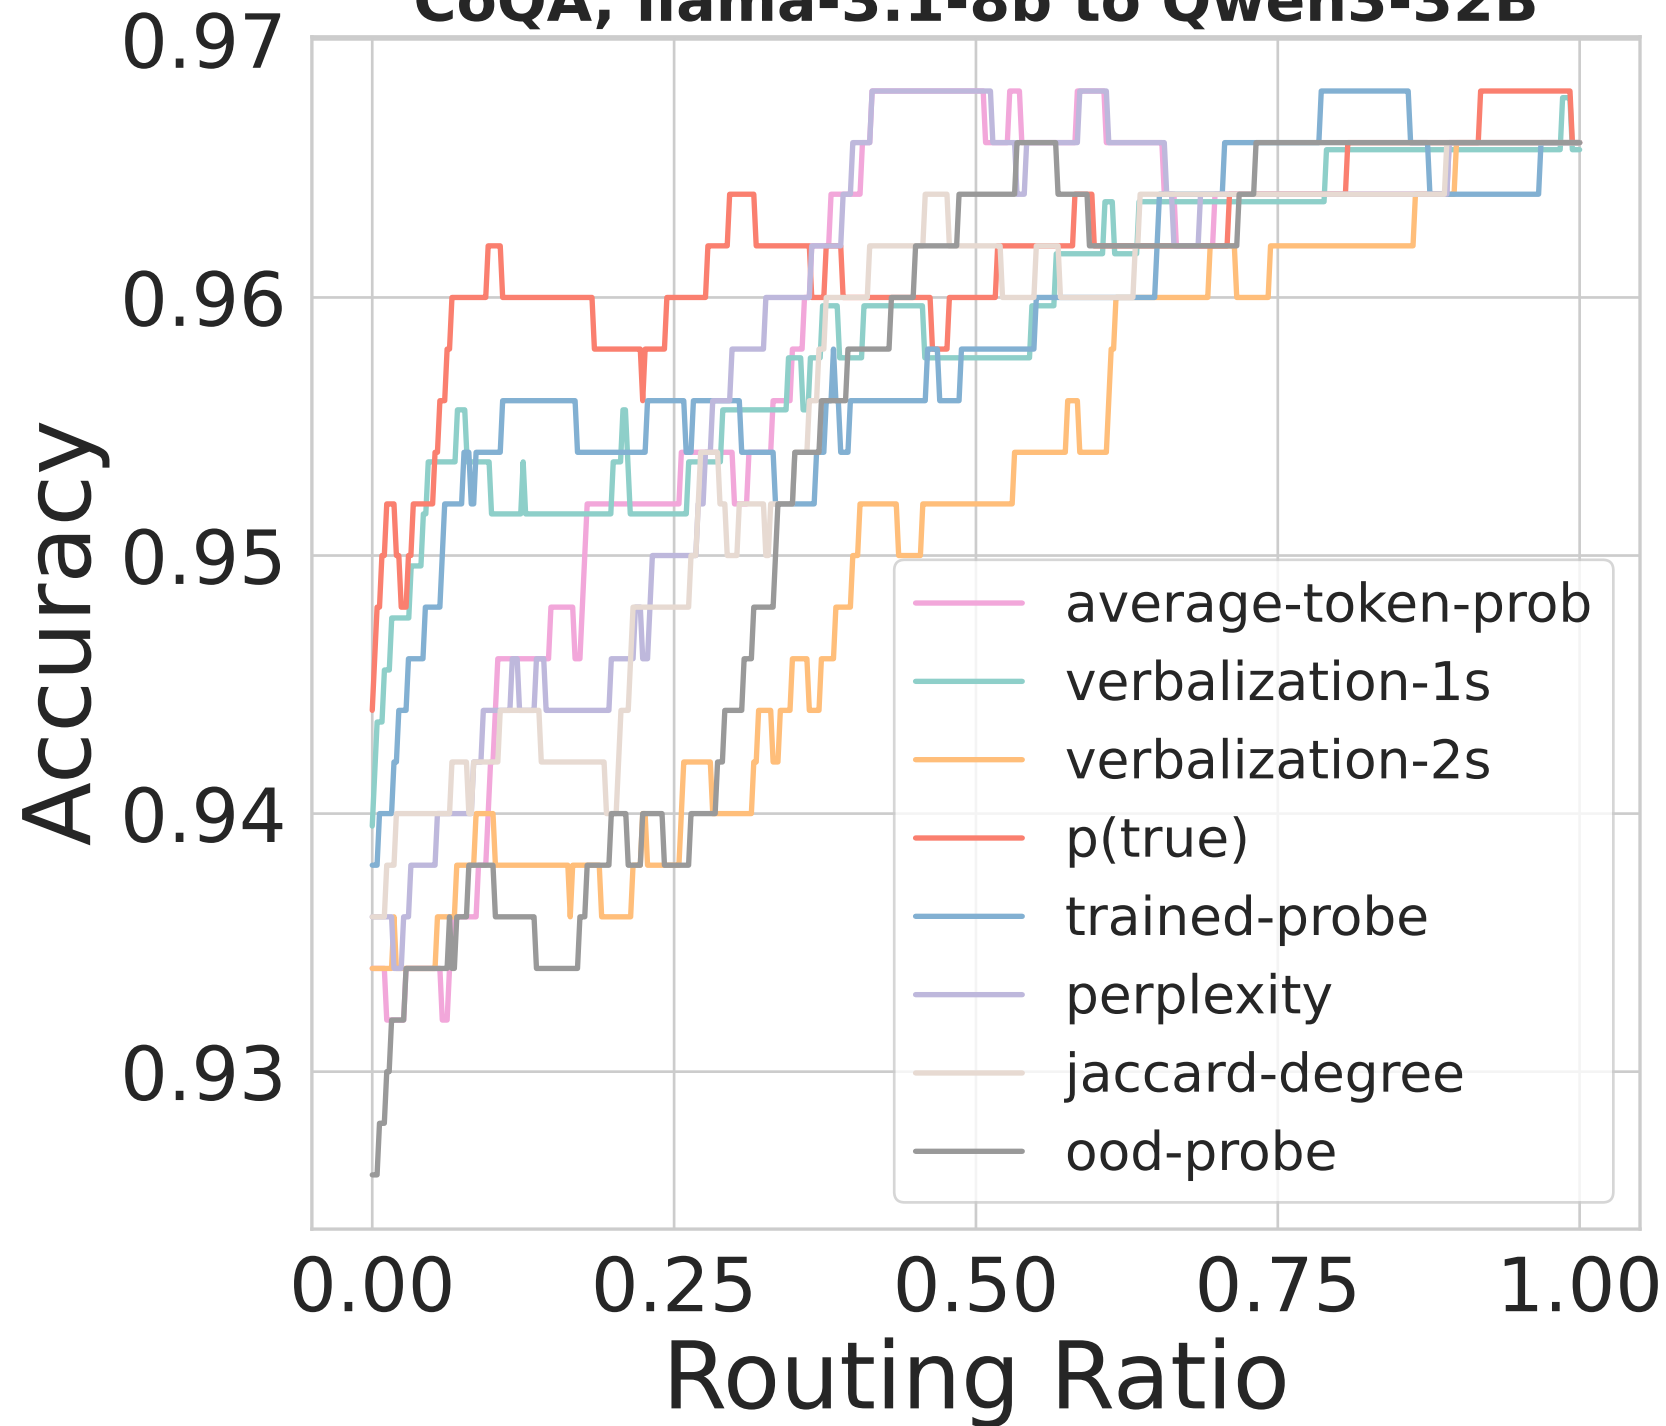

Supplement: supplementary_material [file rr_acc_co_qa_llama-3.1-8b_qwen32.pdf › Routing_SLM_LLMs/Uncertainty-based Routing/w_legend/to_qwen32/rr_acc_co_qa_llama-3.1-8b_qwen32.pdf]

# CoQA, llama-3.2-1b to Qwen3-32B

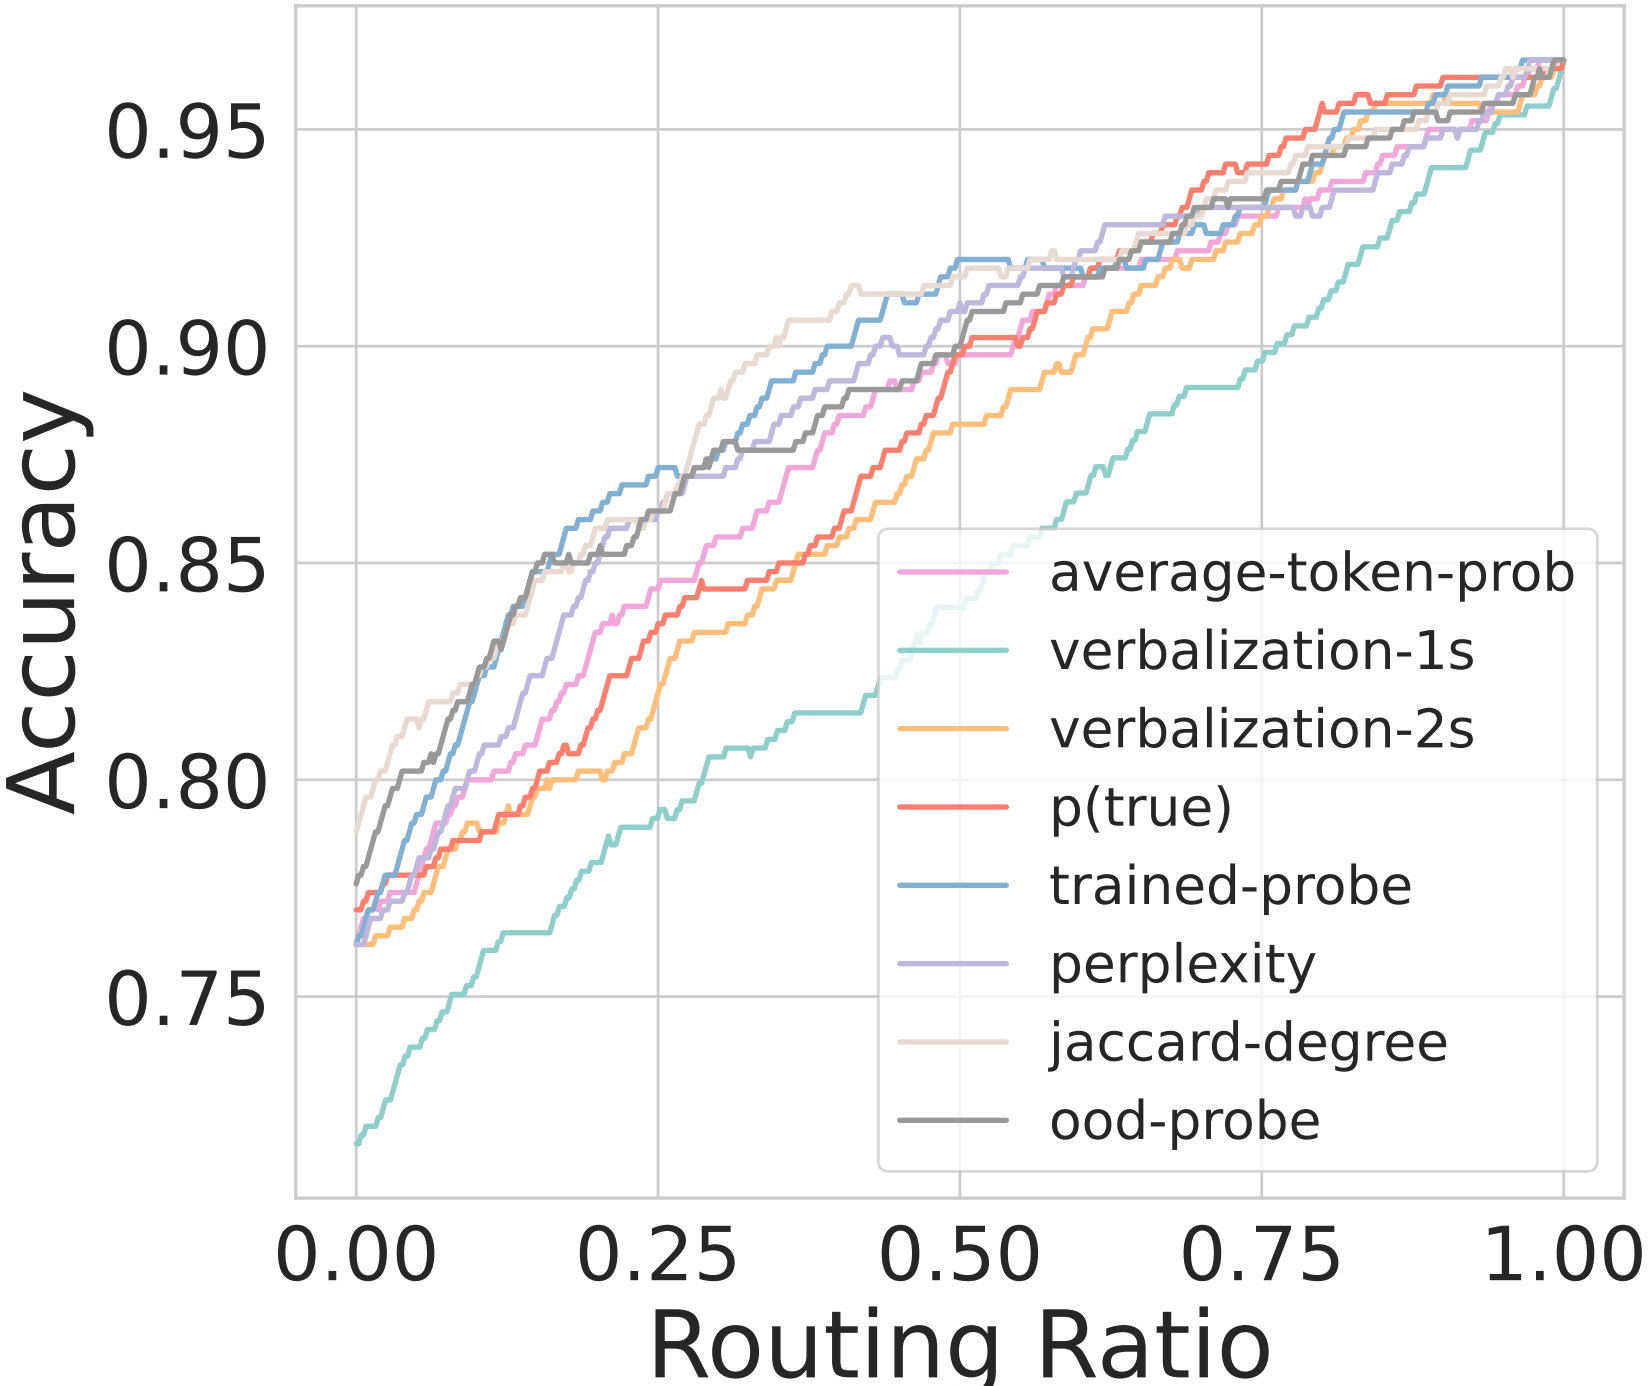

Supplement: supplementary_material [file rr_acc_co_qa_llama-3.2-1b_qwen32.pdf › Routing_SLM_LLMs/Uncertainty-based Routing/w_legend/to_qwen32/rr_acc_co_qa_llama-3.2-1b_qwen32.pdf]

CoQA, llama-3.2-3b to Qwen3-32B

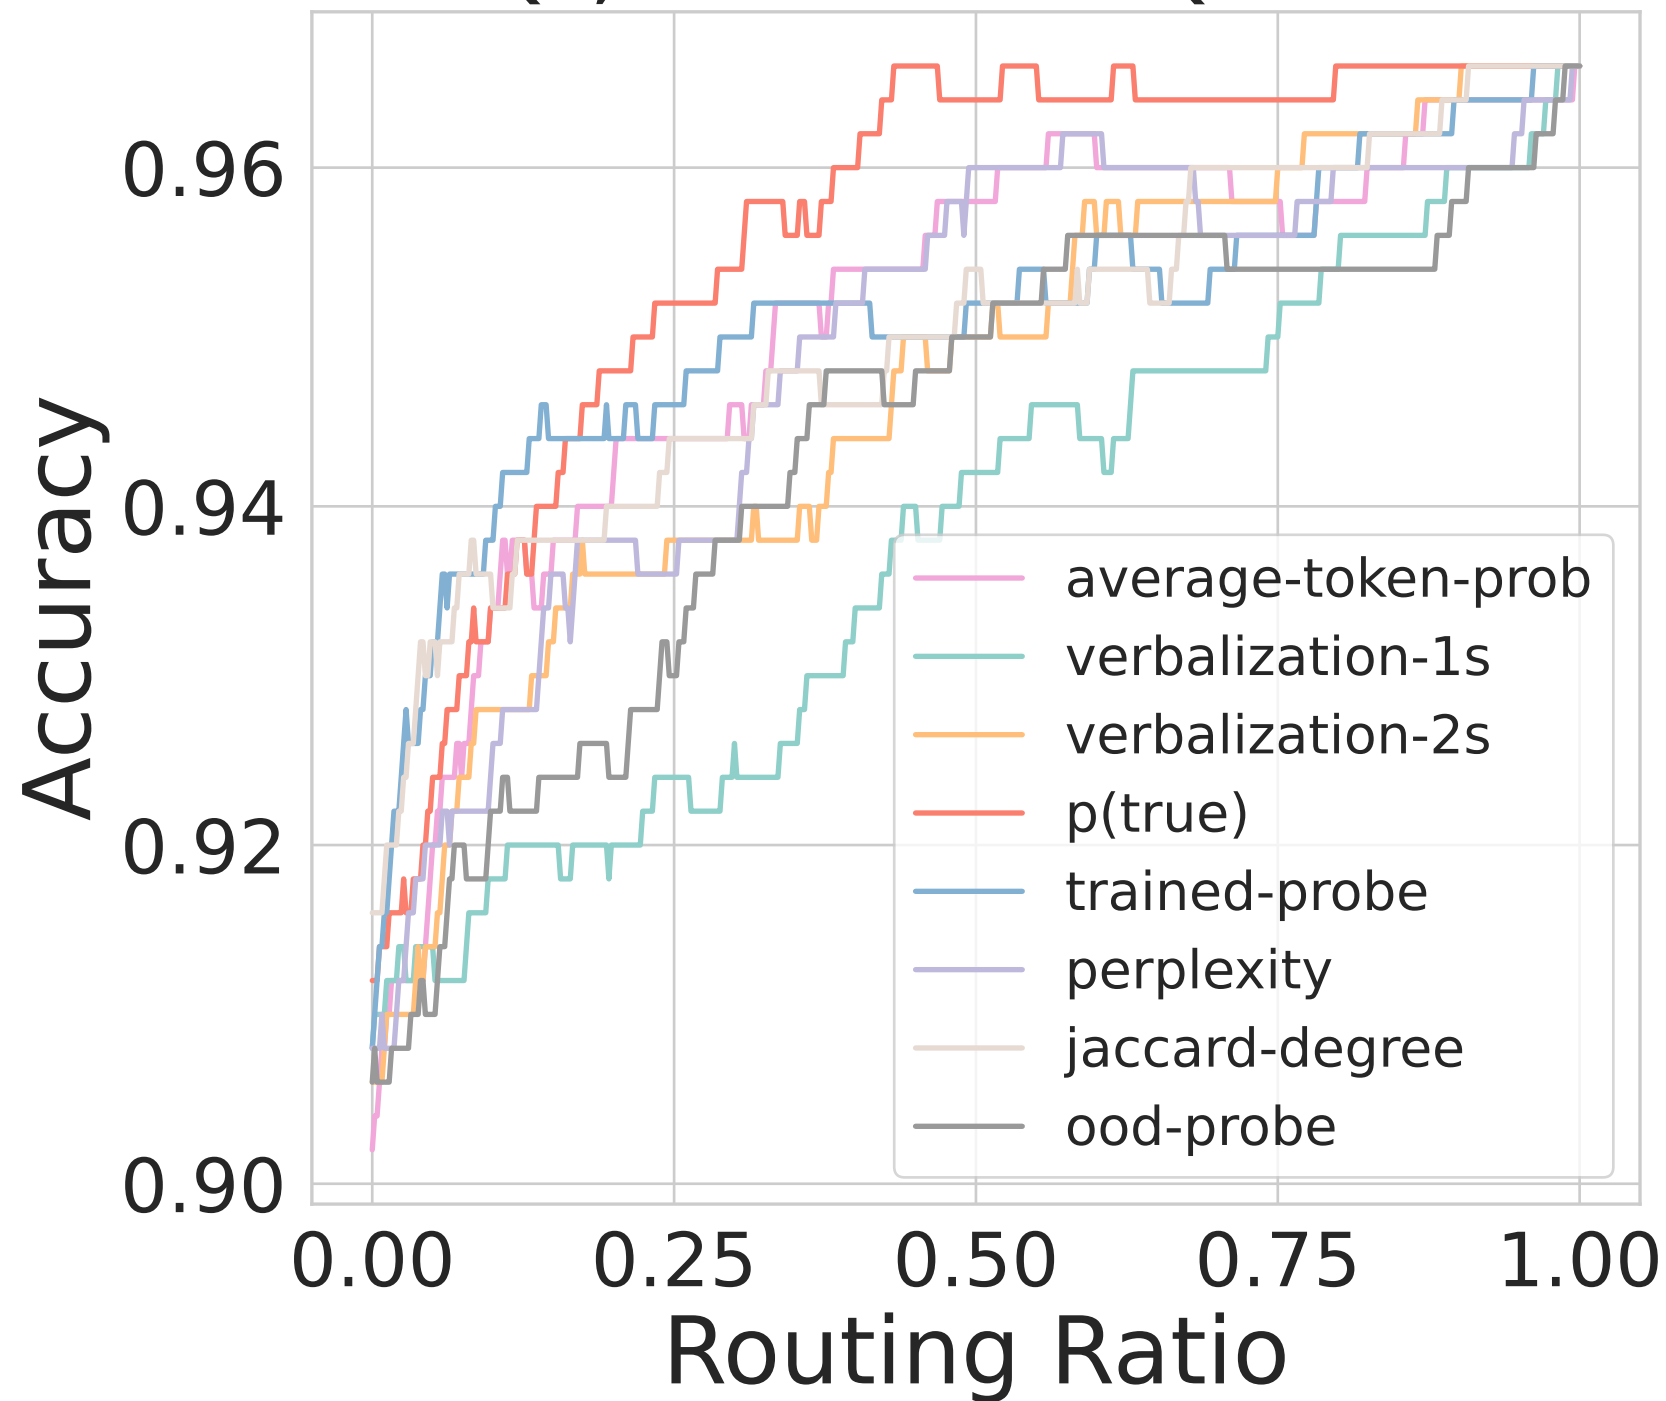

Supplement: supplementary_material [file rr_acc_co_qa_llama-3.2-3b_qwen32.pdf › Routing_SLM_LLMs/Uncertainty-based Routing/w_legend/to_qwen32/rr_acc_co_qa_llama-3.2-3b_qwen32.pdf]

CoQA, mistral-7b to Qwen3-32B

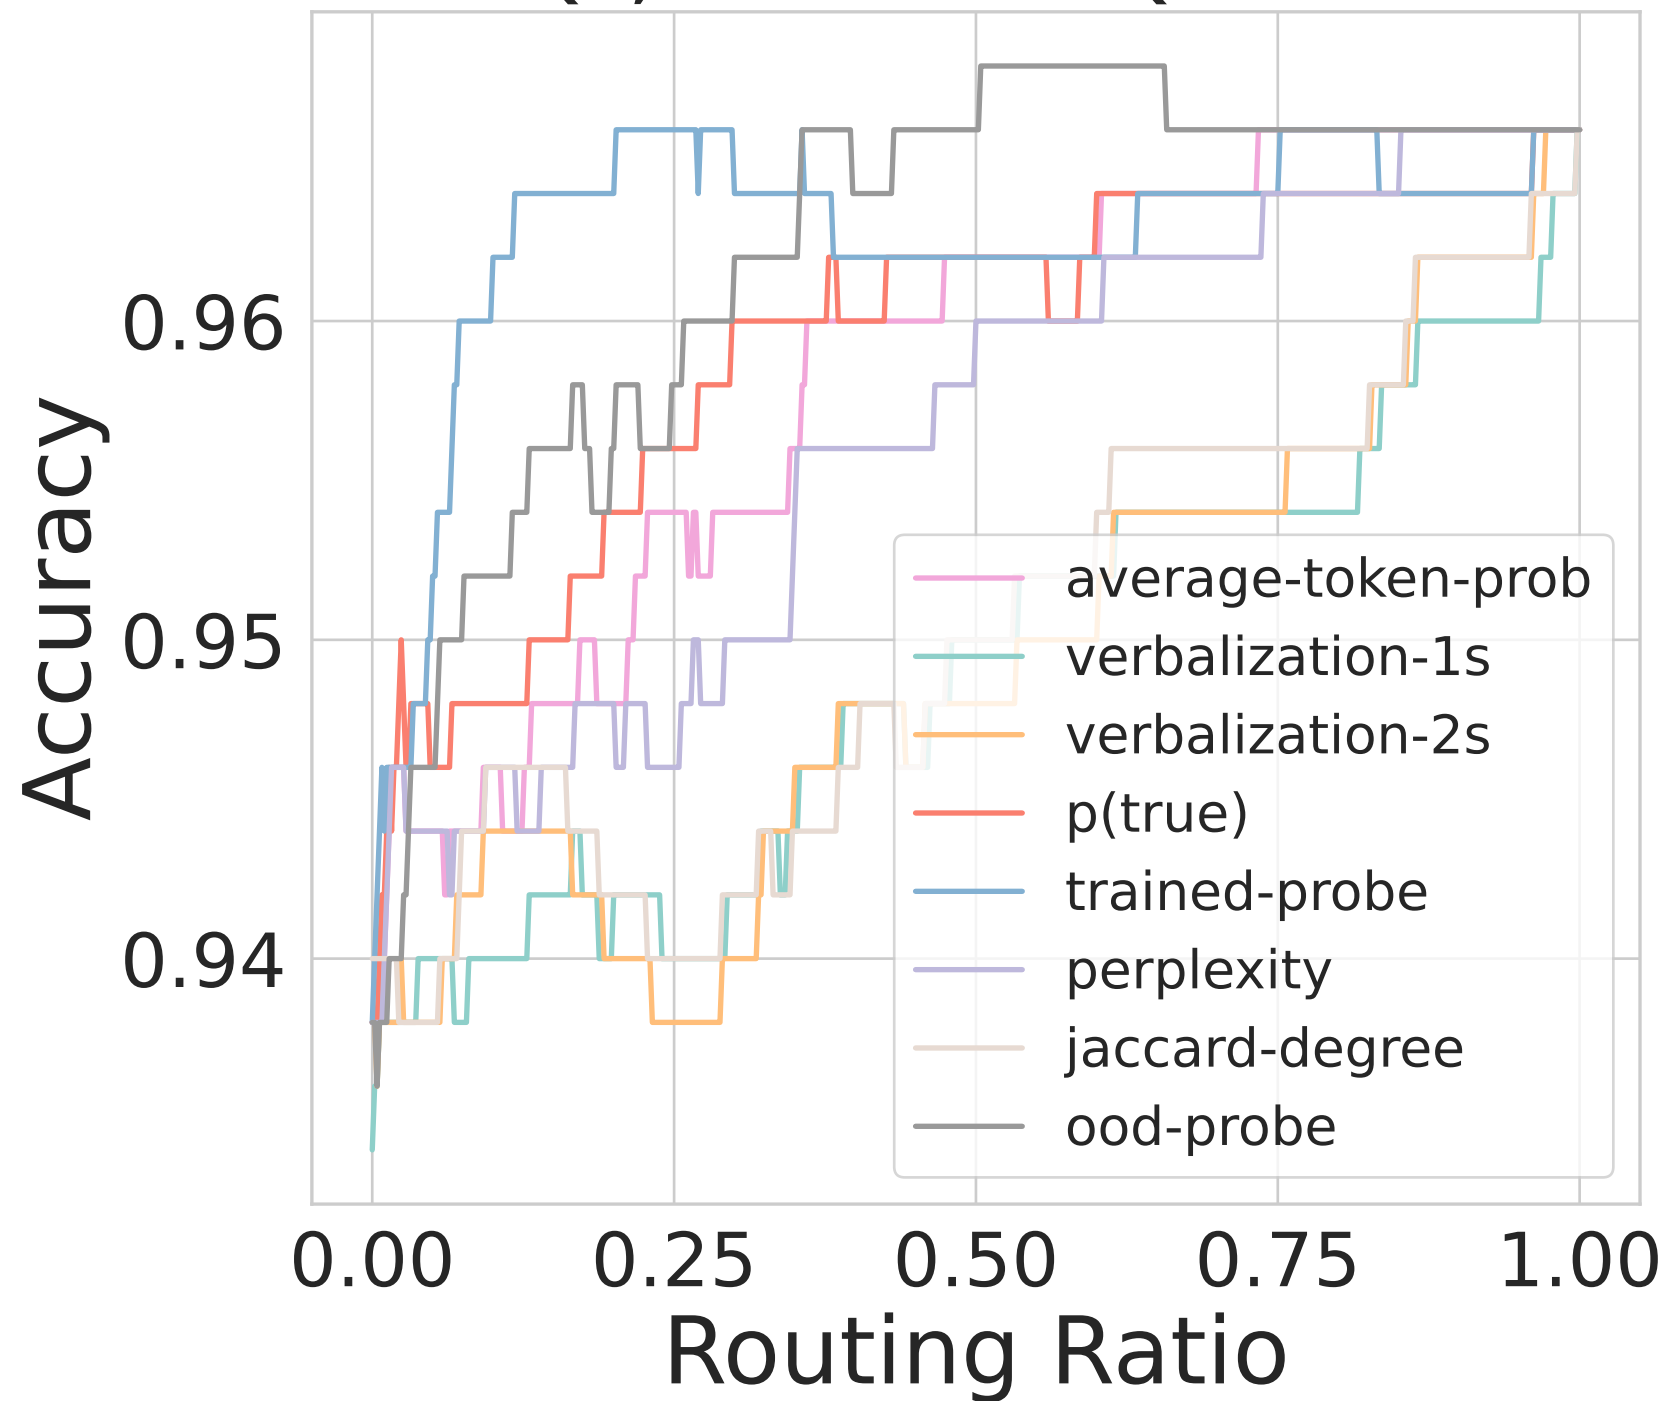

Supplement: supplementary_material [file rr_acc_co_qa_mistral-7b_qwen32.pdf › Routing_SLM_LLMs/Uncertainty-based Routing/w_legend/to_qwen32/rr_acc_co_qa_mistral-7b_qwen32.pdf]

# CoQA, phi-3.5-mini to Qwen3-32B

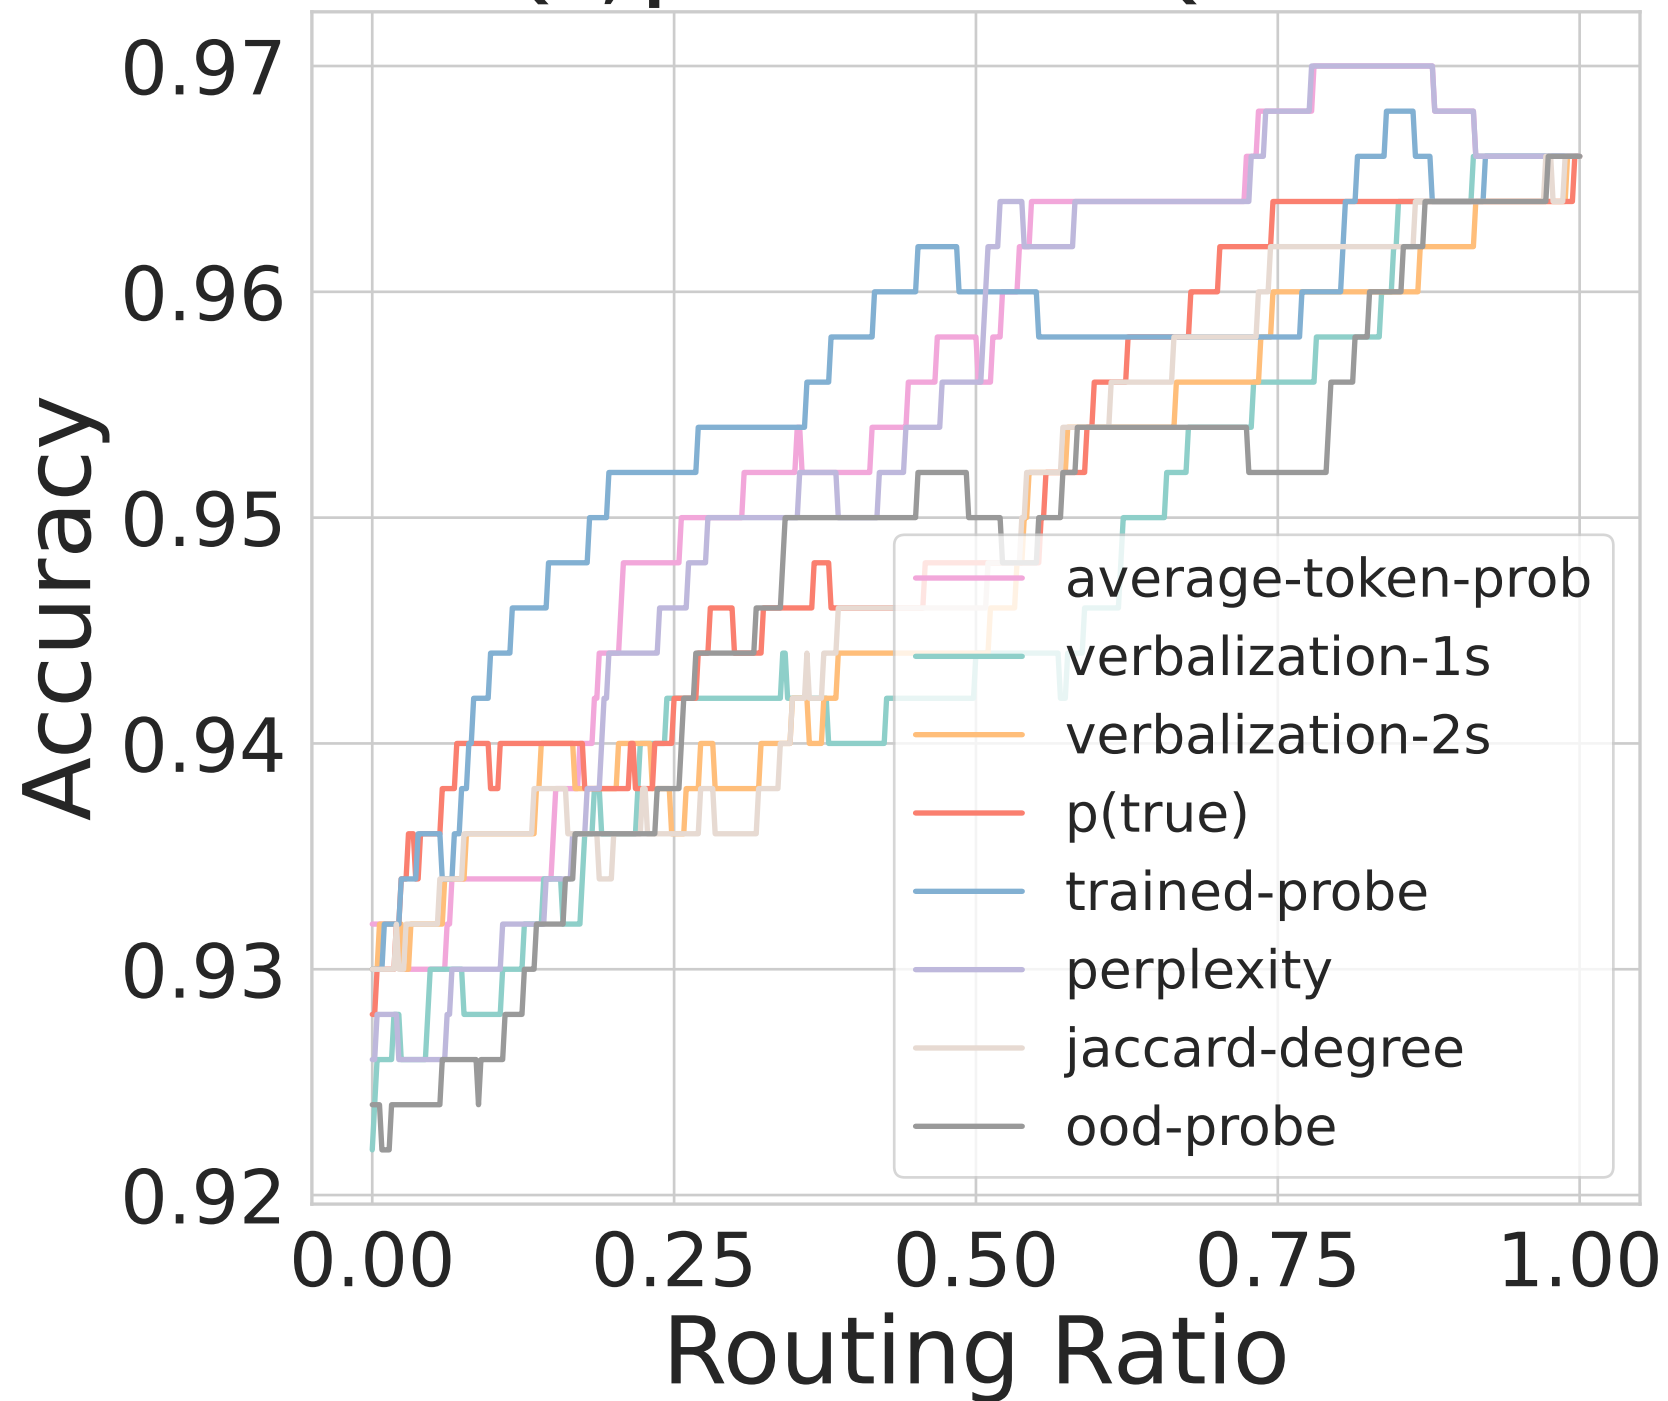

Supplement: supplementary_material [file rr_acc_co_qa_phi-3.5-mini_qwen32.pdf › Routing_SLM_LLMs/Uncertainty-based Routing/w_legend/to_qwen32/rr_acc_co_qa_phi-3.5-mini_qwen32.pdf]

# CoQA, phi-4-mini-reasoning to Qwen3-32B

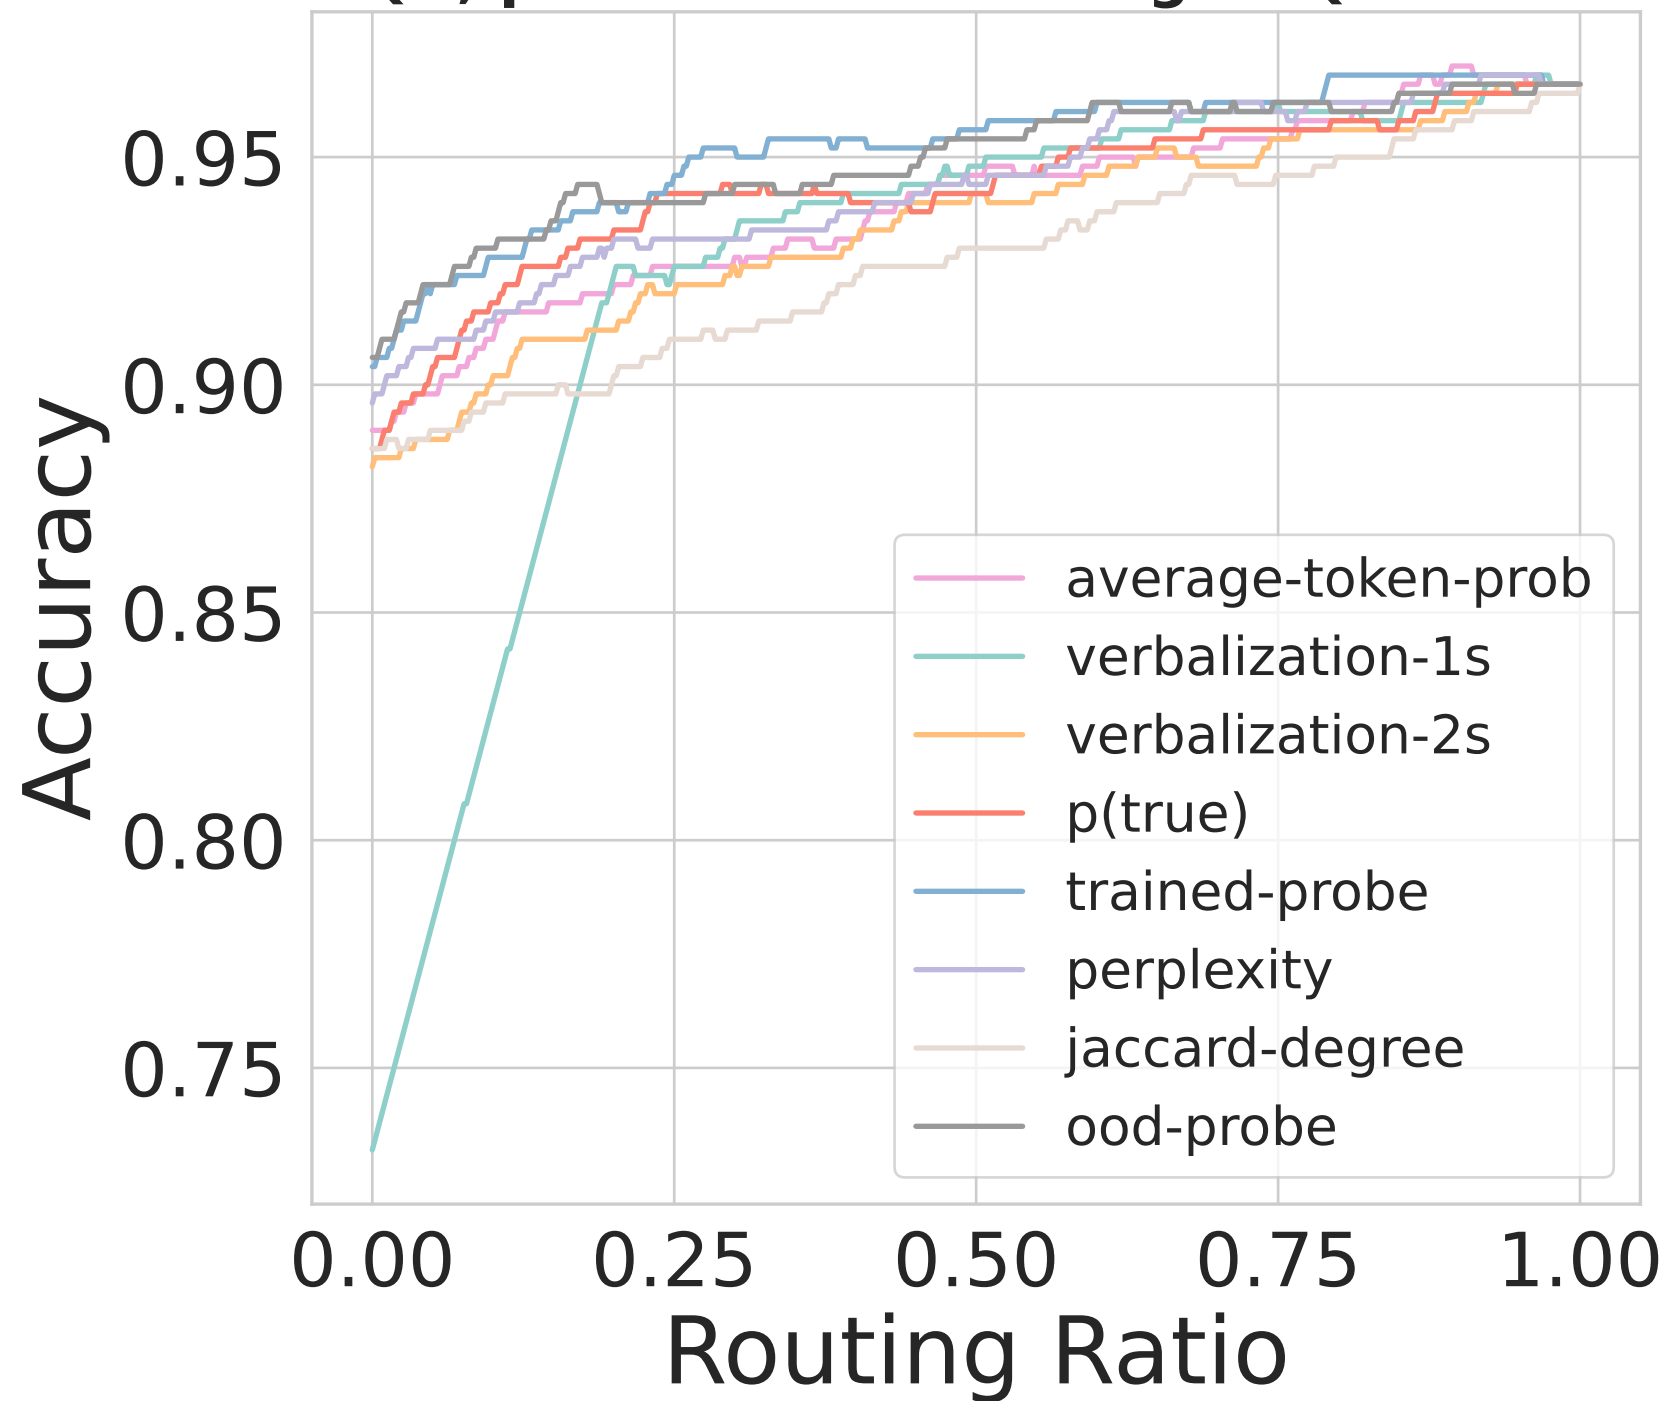

Supplement: supplementary_material [file rr_acc_co_qa_phi-4-mini-reasoning_qwen32.pdf › Routing_SLM_LLMs/Uncertainty-based Routing/w_legend/to_qwen32/rr_acc_co_qa_phi-4-mini-reasoning_qwen32.pdf]

CoQA, qwen-2.5-7b to Qwen3-32B

Accuracy

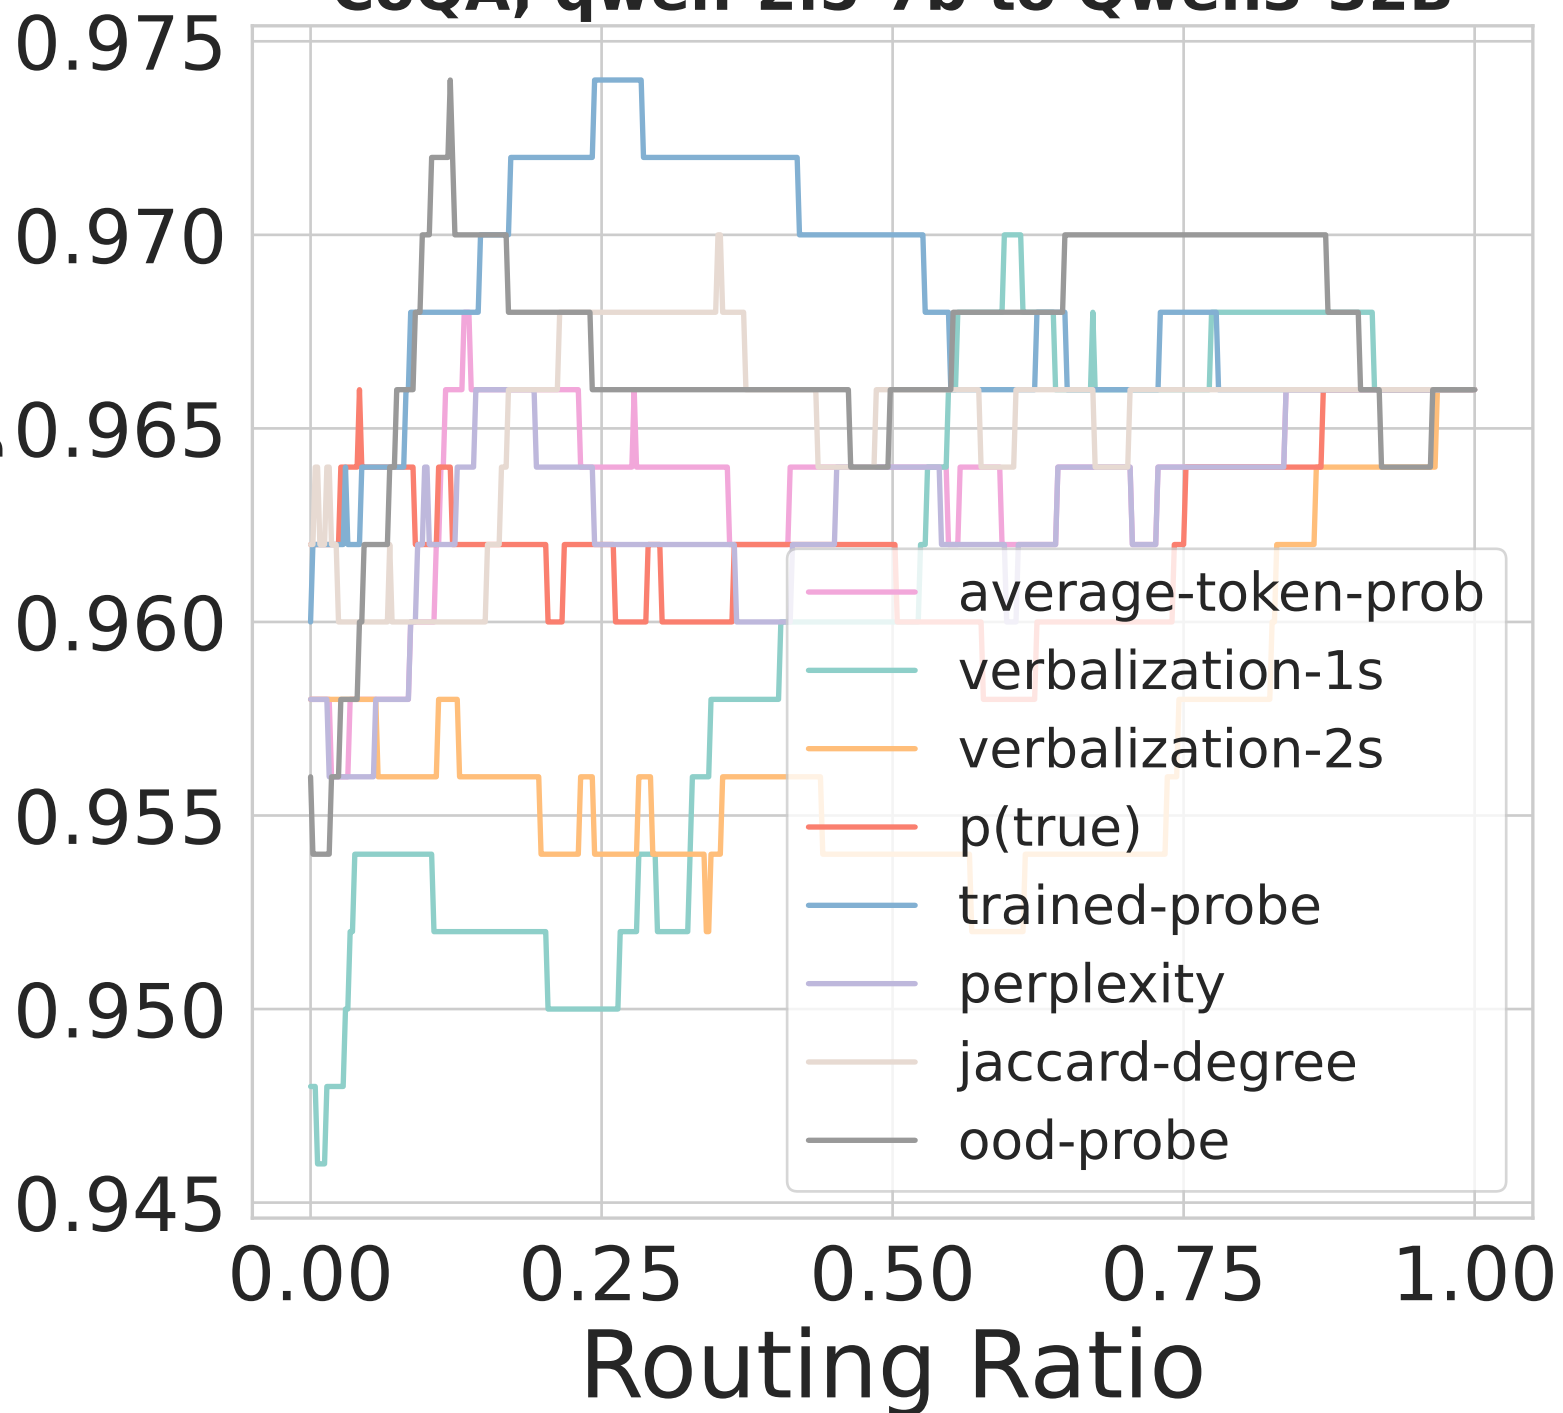

Supplement: supplementary_material [file rr_acc_co_qa_qwen-2.5-7b_qwen32.pdf › Routing_SLM_LLMs/Uncertainty-based Routing/w_legend/to_qwen32/rr_acc_co_qa_qwen-2.5-7b_qwen32.pdf]

CoQA, rwkv to Qwen3-32B

Accuracy

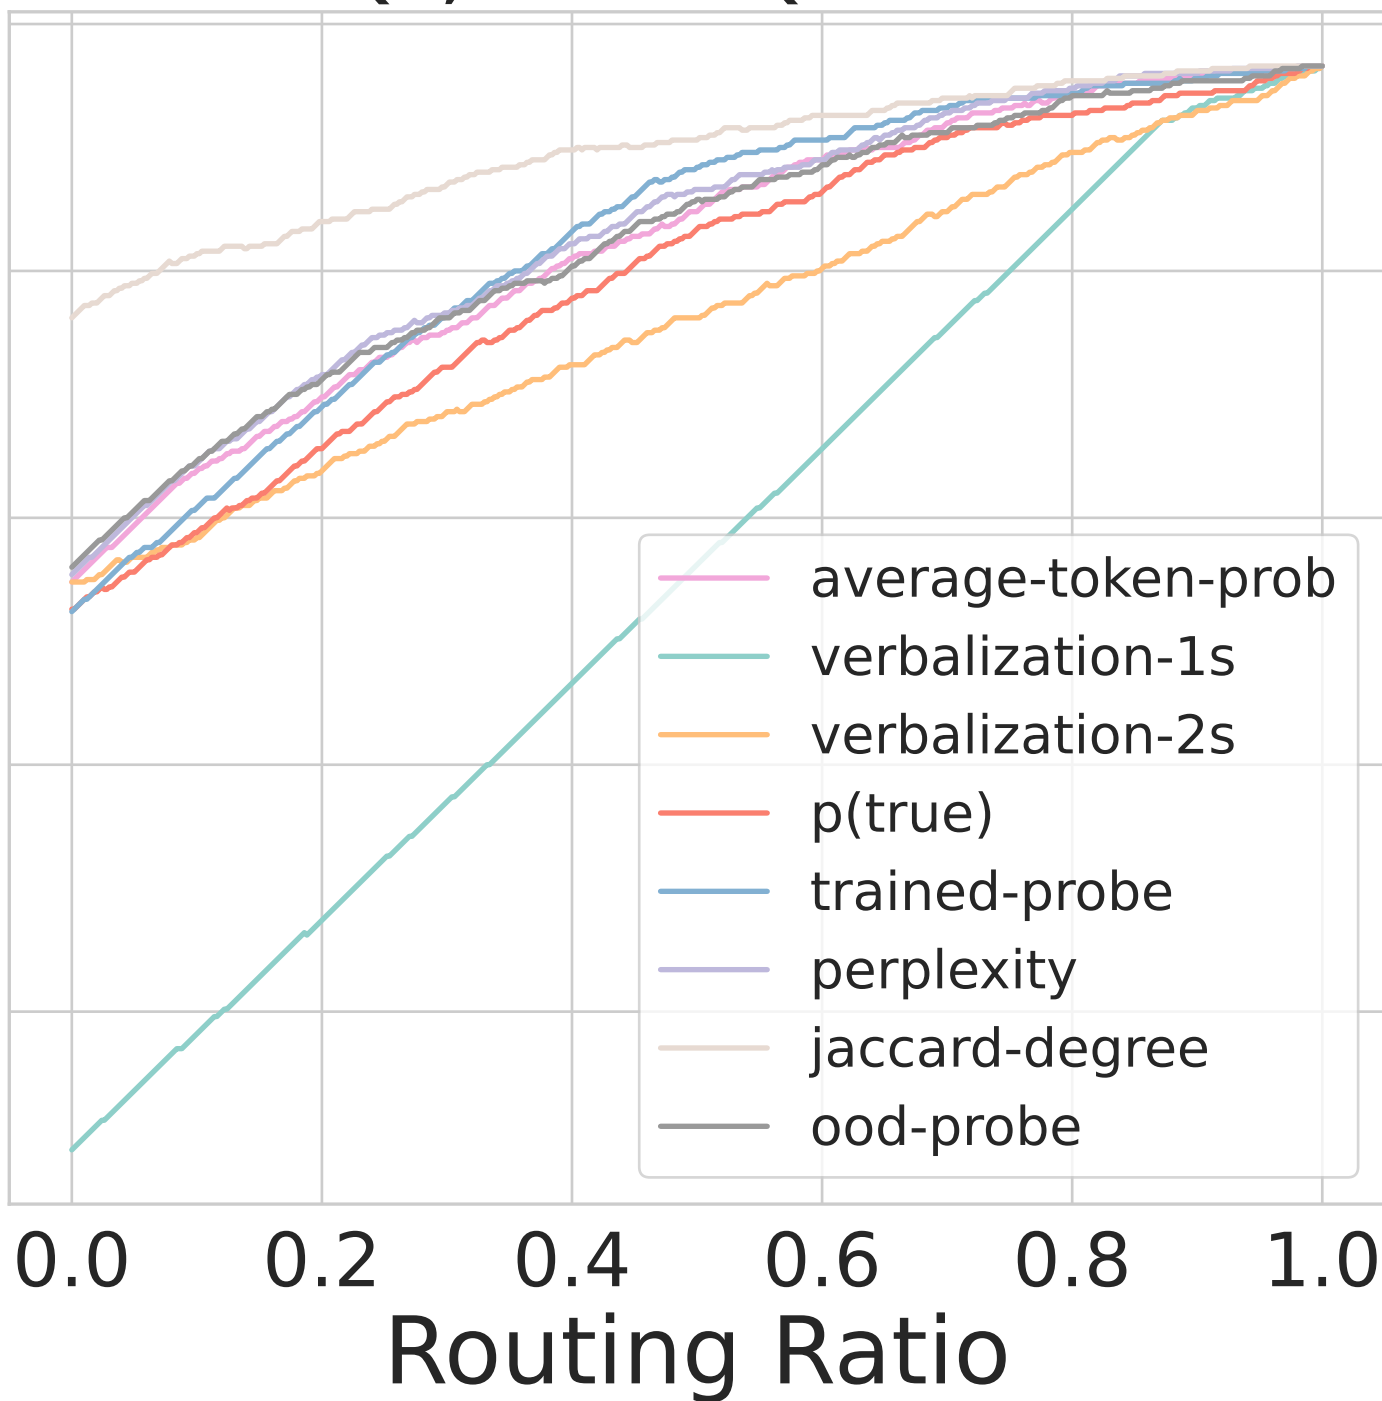

Supplement: supplementary_material [file rr_acc_co_qa_rwkv_qwen32.pdf › Routing_SLM_LLMs/Uncertainty-based Routing/w_legend/to_qwen32/rr_acc_co_qa_rwkv_qwen32.pdf]

# CommonsenseQA, Qwen3-0.6B to Qwen3-32B

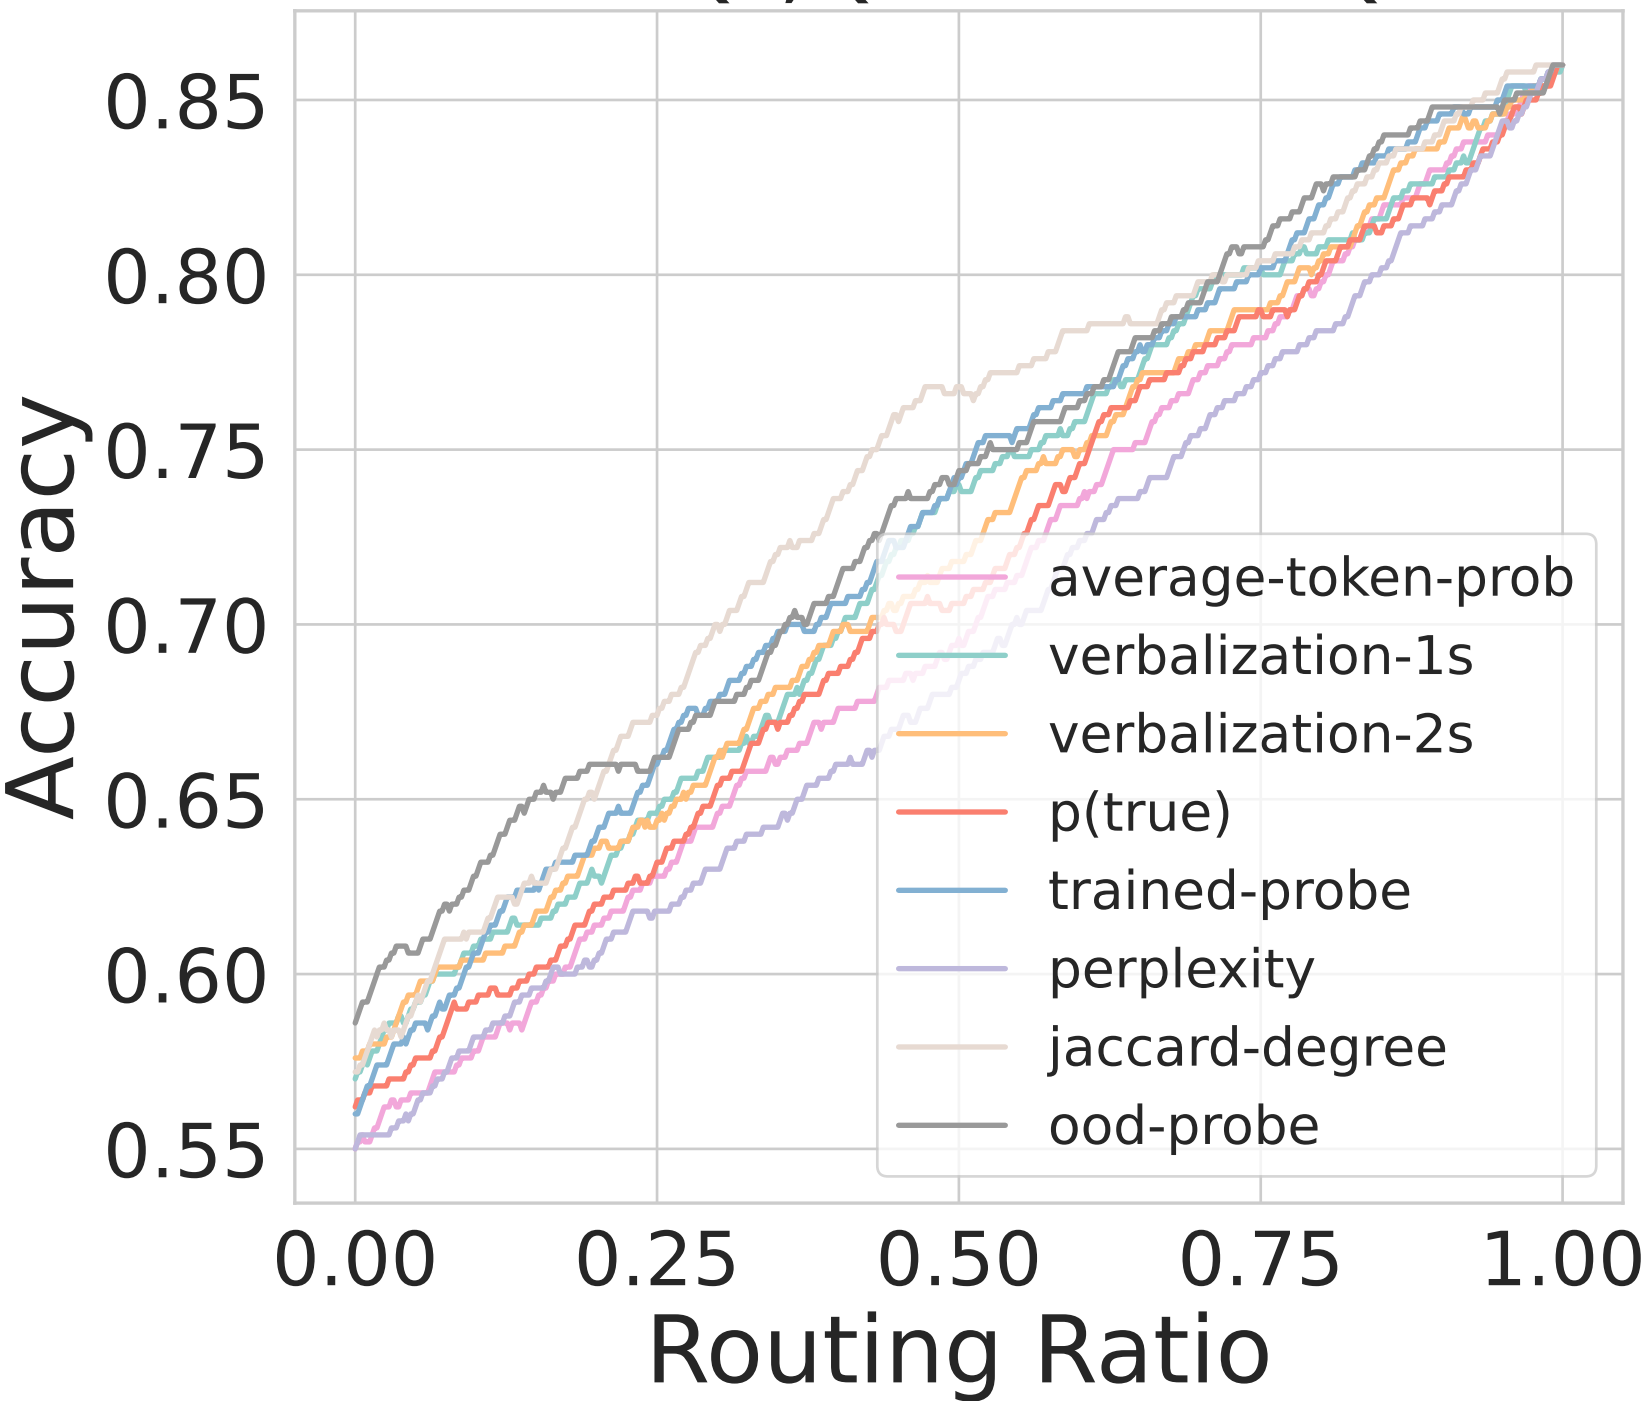

Supplement: supplementary_material [file rr_acc_commonsense_qa_Qwen3-0.6B_qwen32.pdf › Routing_SLM_LLMs/Uncertainty-based Routing/w_legend/to_qwen32/rr_acc_commonsense_qa_Qwen3-0.6B_qwen32.pdf]

## CommonsenseQA, Qwen3-1.7B to Qwen3-32B

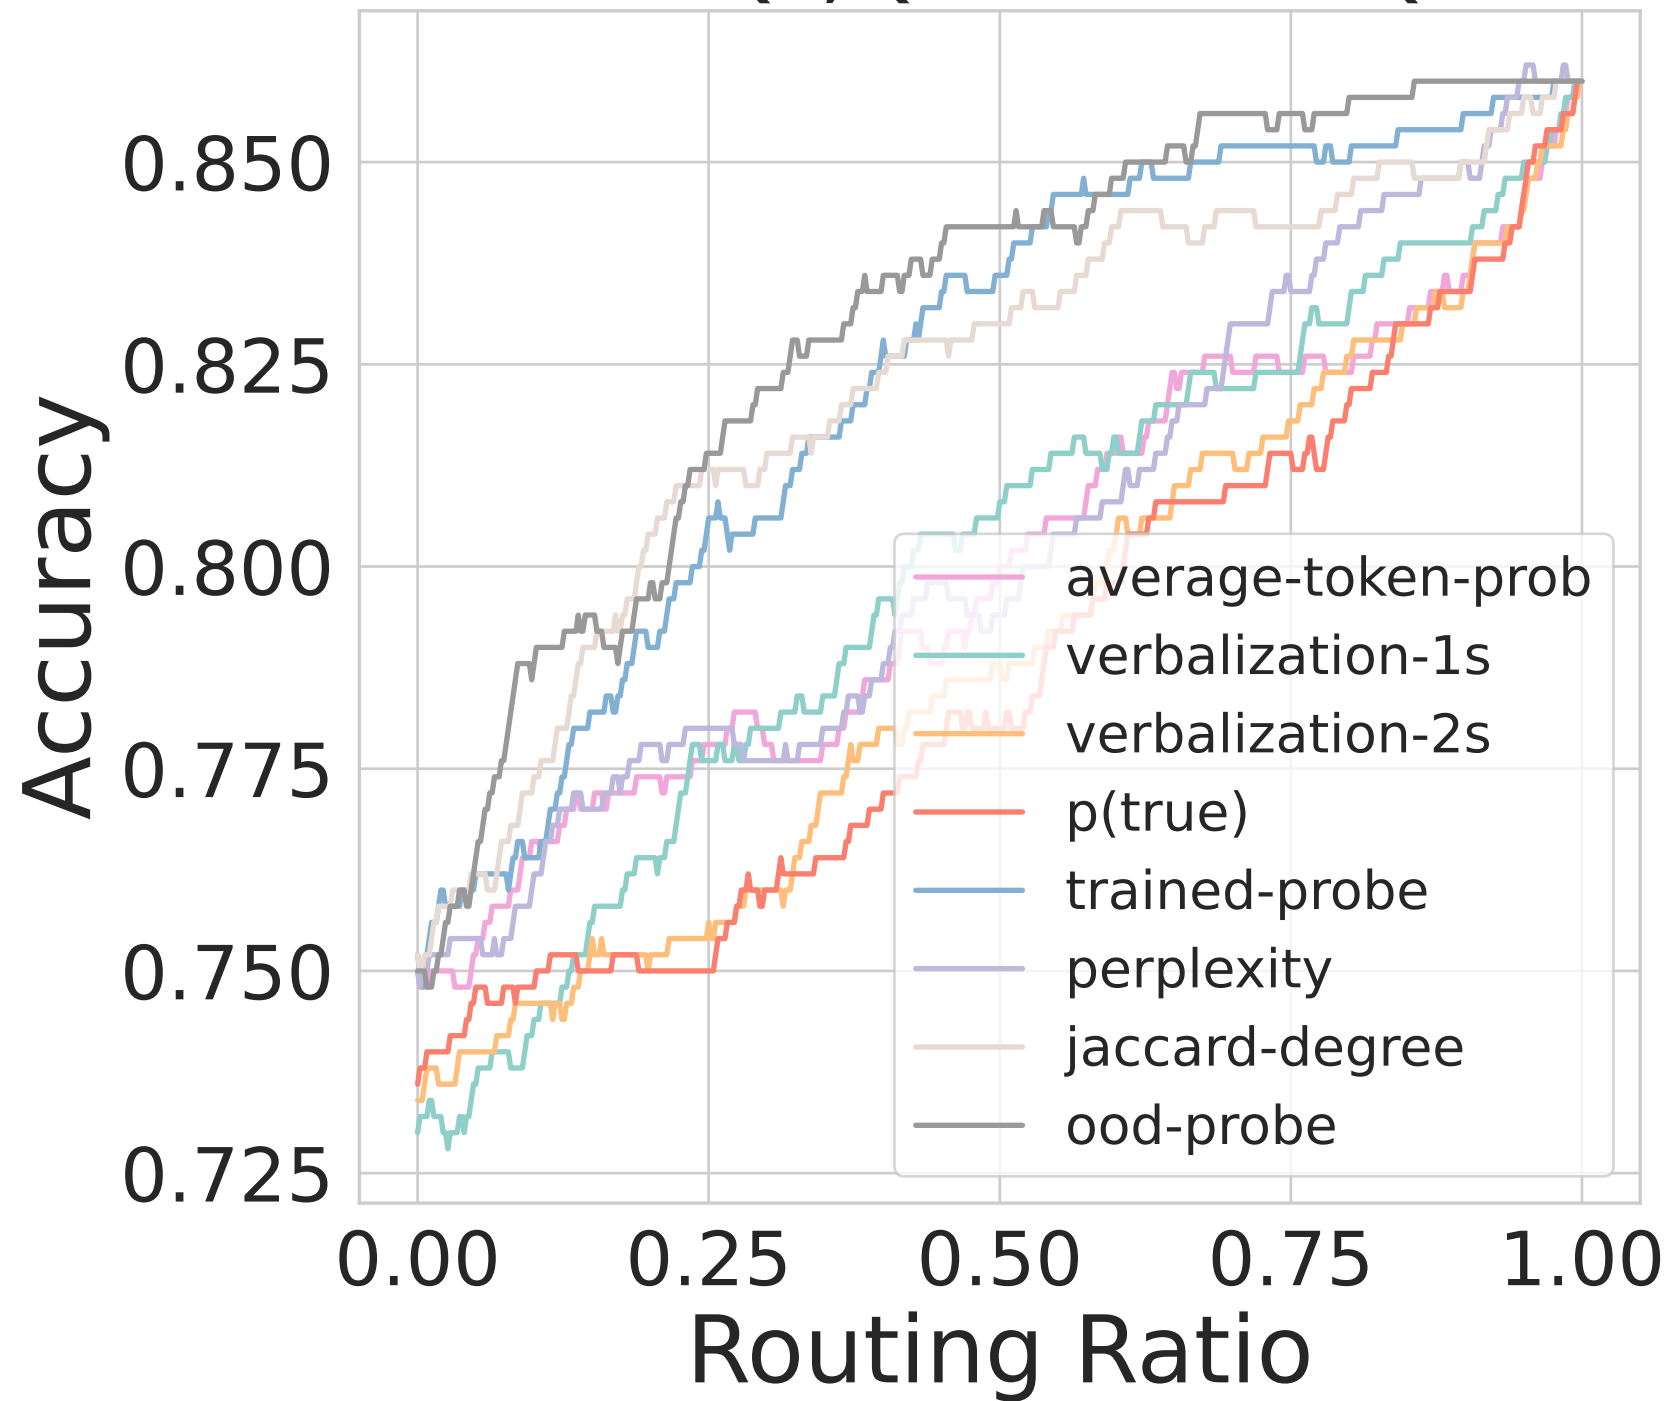

Supplement: supplementary_material [file rr_acc_commonsense_qa_Qwen3-1.7B_qwen32.pdf › Routing_SLM_LLMs/Uncertainty-based Routing/w_legend/to_qwen32/rr_acc_commonsense_qa_Qwen3-1.7B_qwen32.pdf]

**CommonsenseQA, Qwen3-4B to Qwen3-32B**

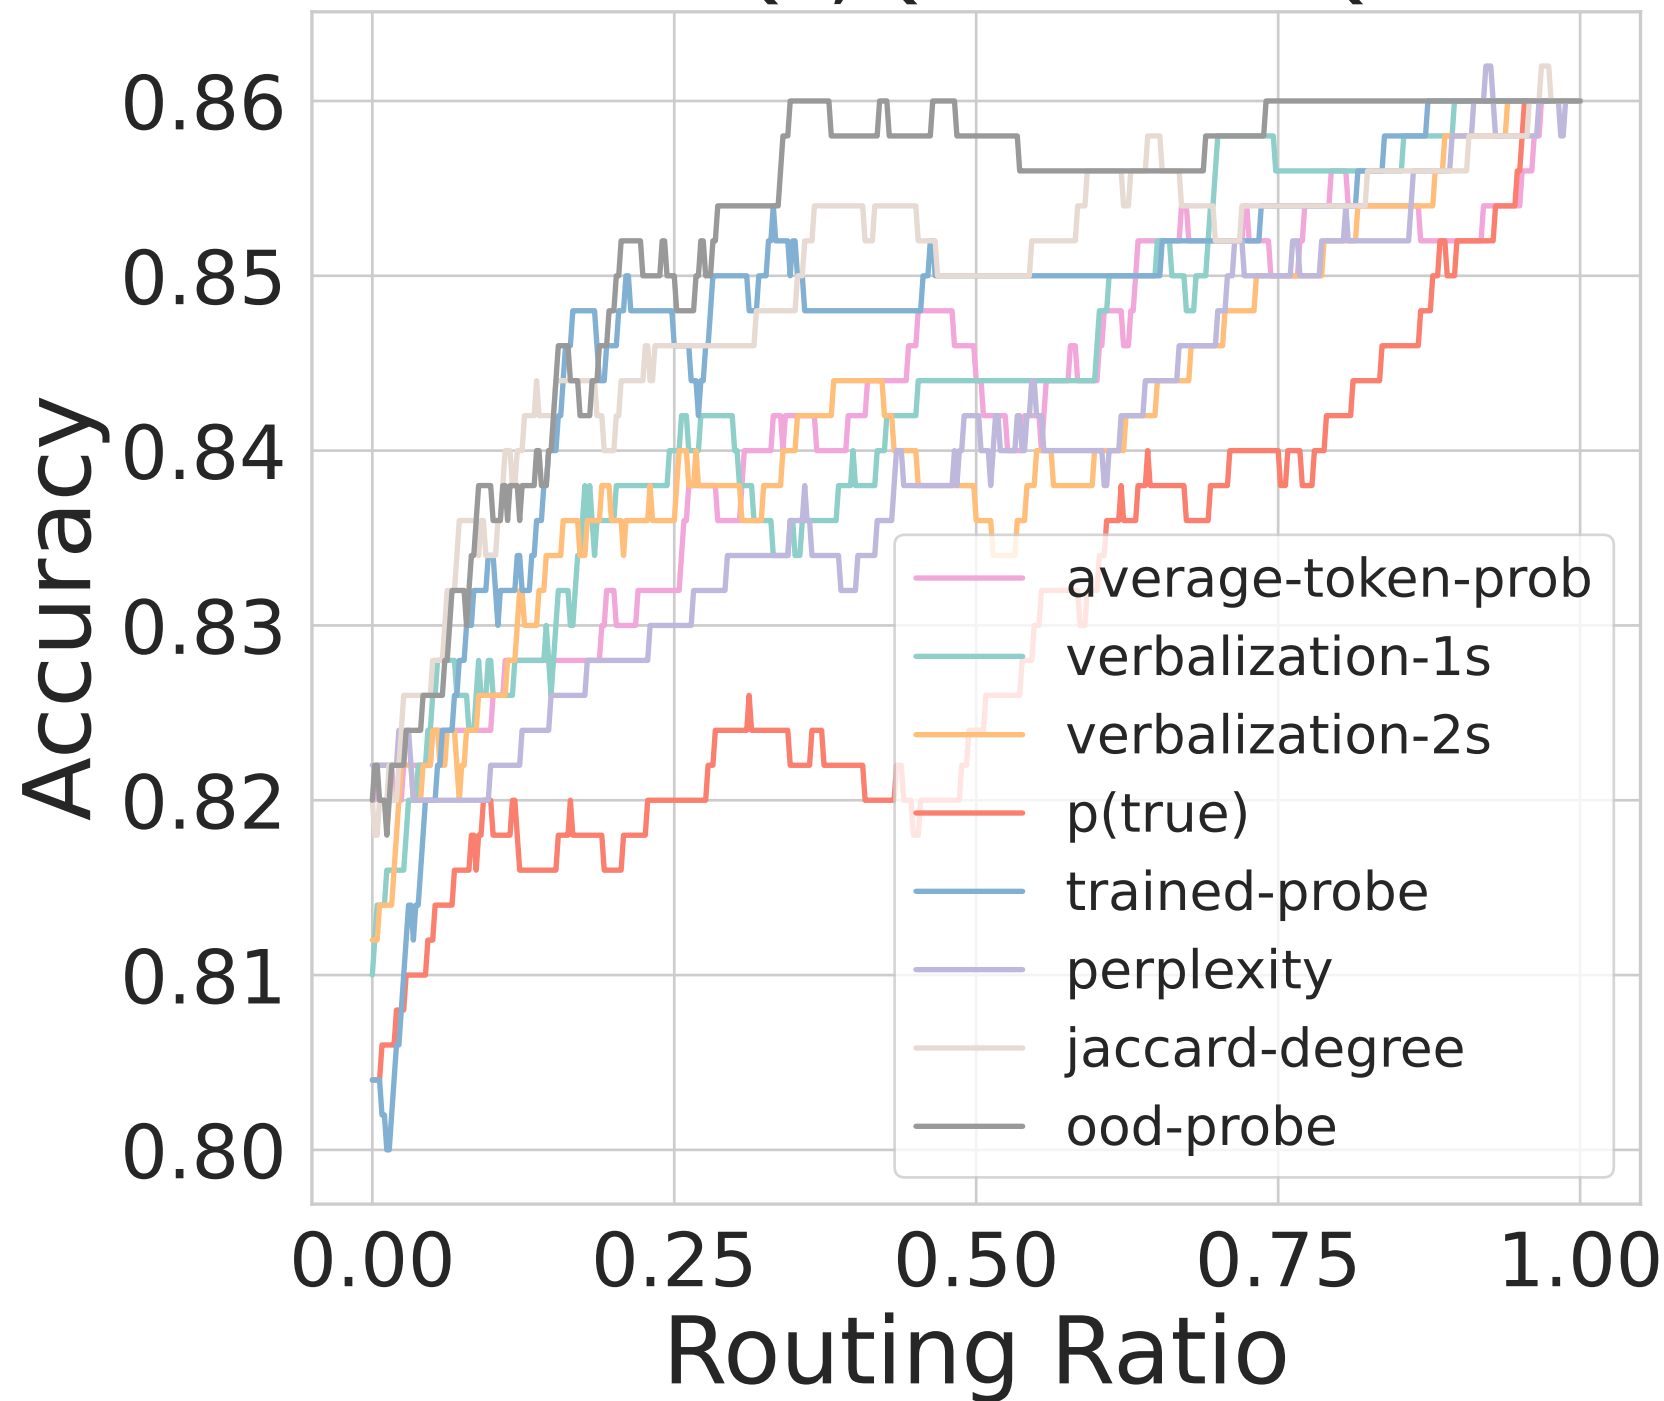

Supplement: supplementary_material [file rr_acc_commonsense_qa_Qwen3-4B_qwen32.pdf › Routing_SLM_LLMs/Uncertainty-based Routing/w_legend/to_qwen32/rr_acc_commonsense_qa_Qwen3-4B_qwen32.pdf]

# CommonsenseQA, granite-3.1-8b to Qwen3-32B

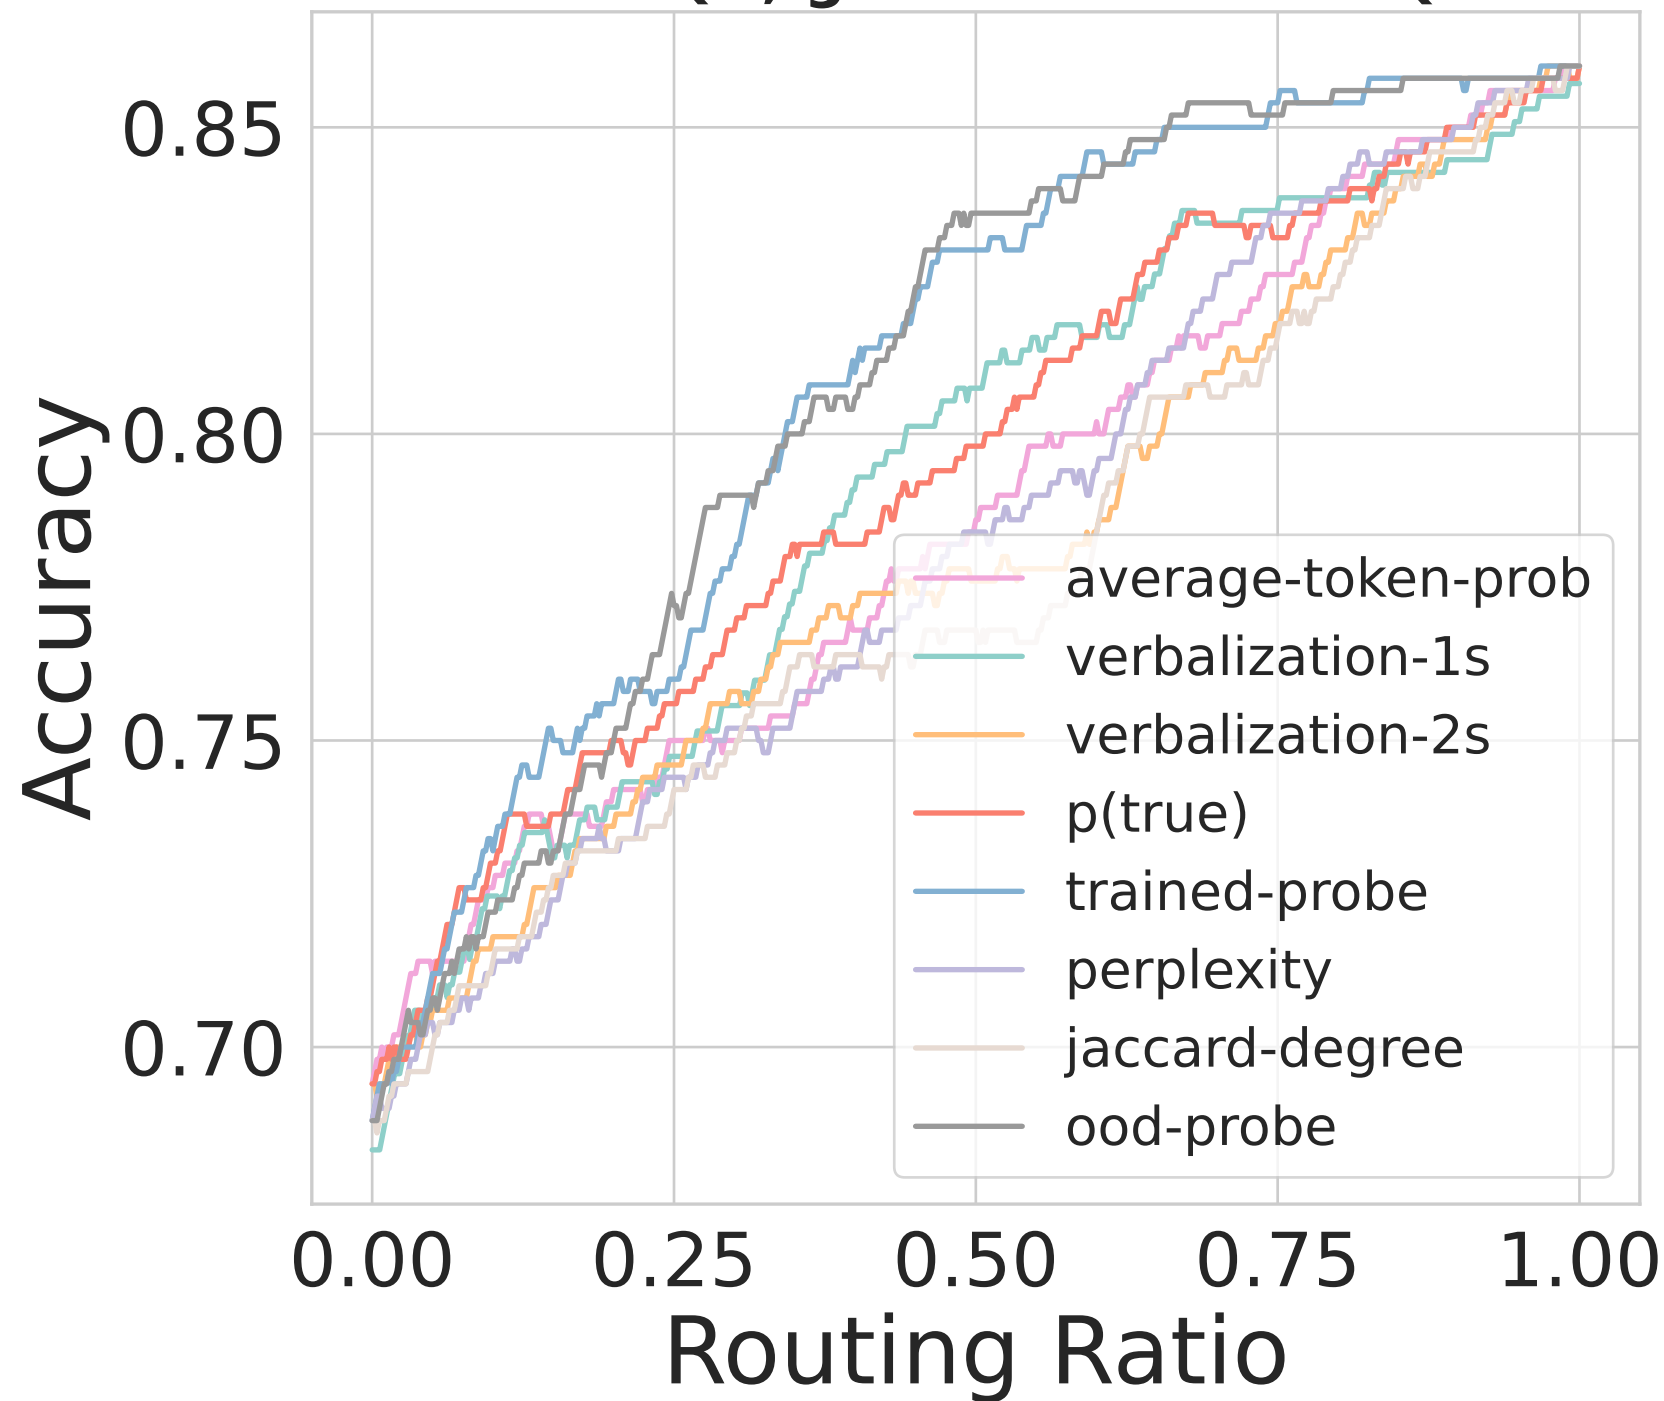

Supplement: supplementary_material [file rr_acc_commonsense_qa_granite-3.1-8b_qwen32.pdf › Routing_SLM_LLMs/Uncertainty-based Routing/w_legend/to_qwen32/rr_acc_commonsense_qa_granite-3.1-8b_qwen32.pdf]

# CommonsenseQA, llama-3.1-8b to Qwen3-32B

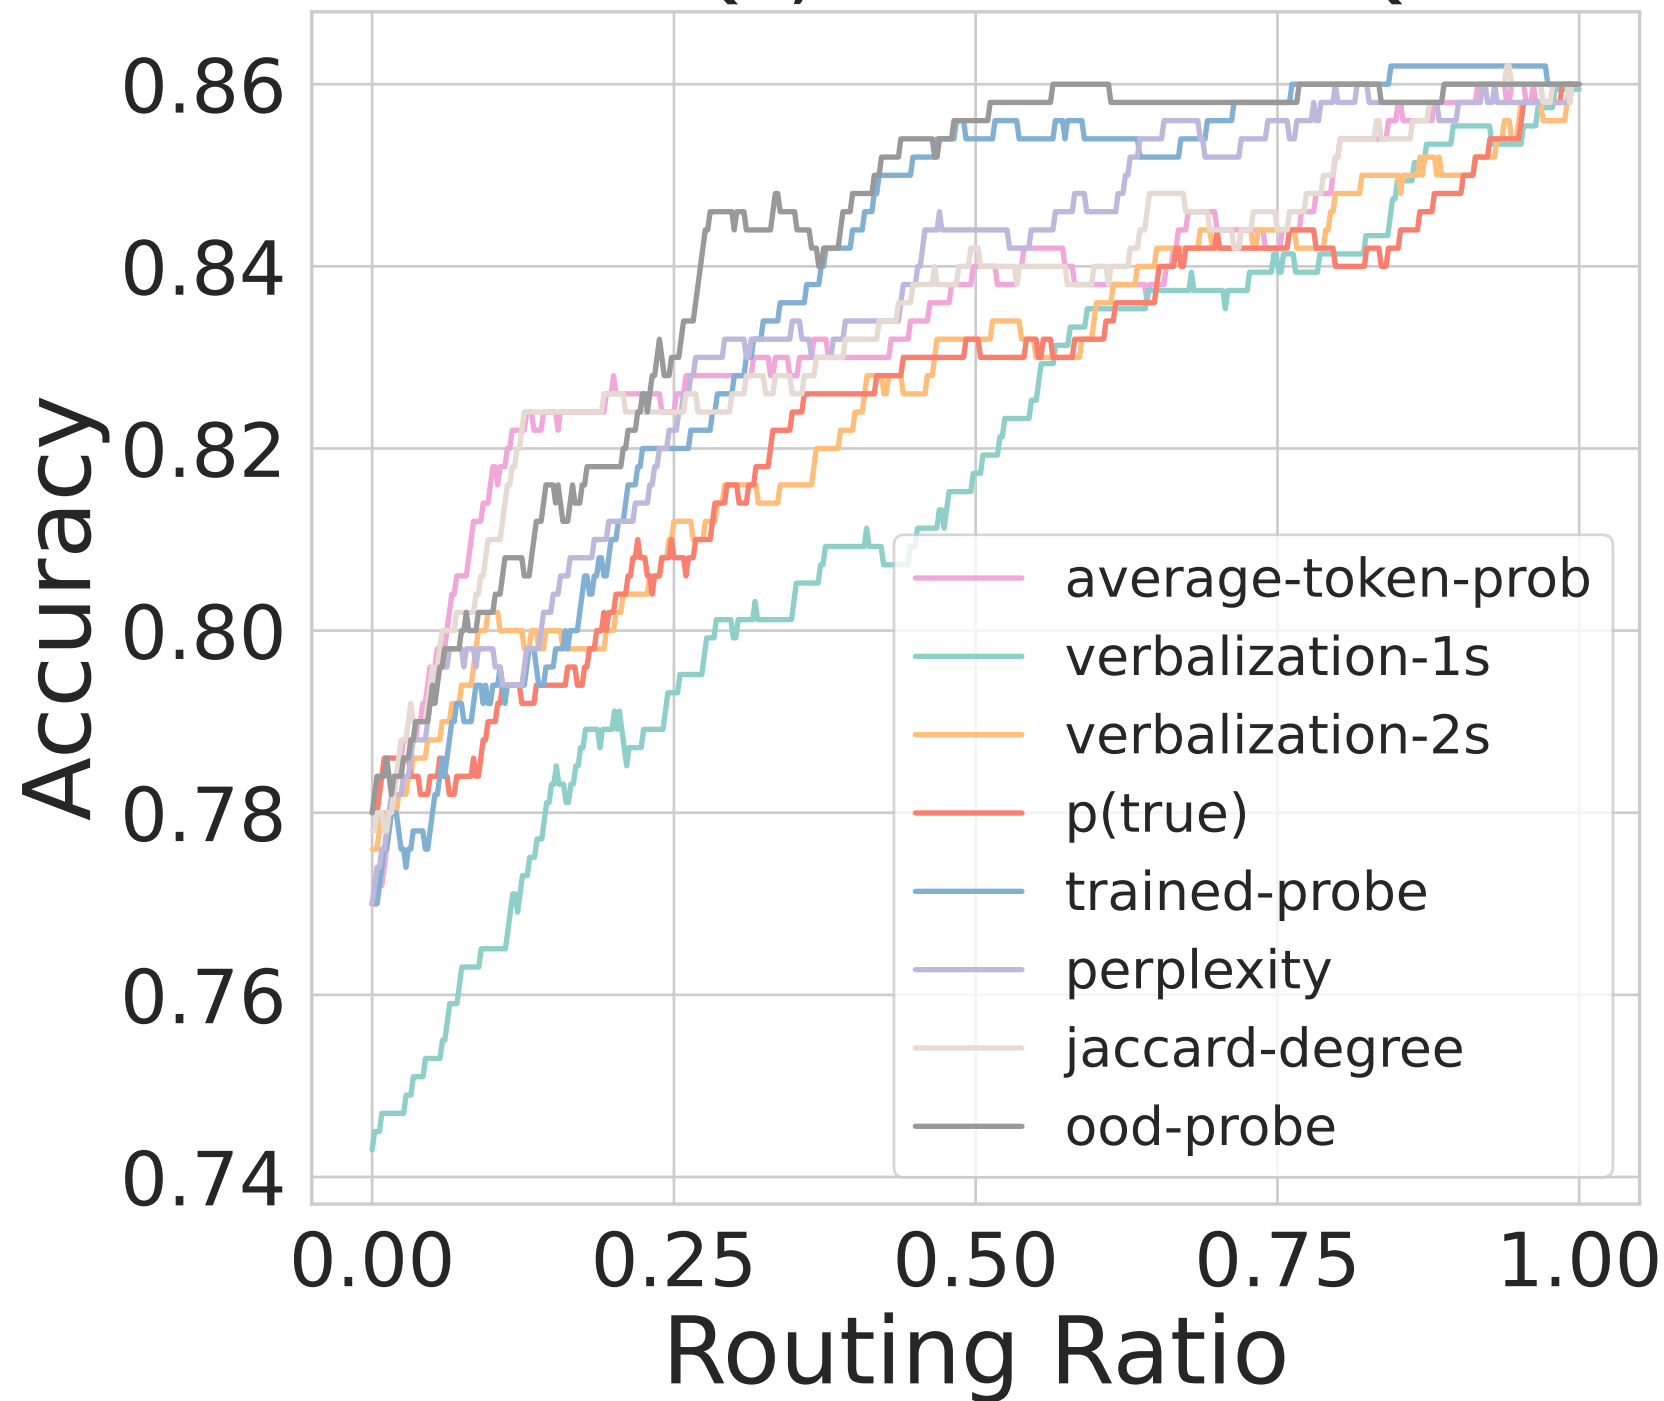

Supplement: supplementary_material [file rr_acc_commonsense_qa_llama-3.1-8b_qwen32.pdf › Routing_SLM_LLMs/Uncertainty-based Routing/w_legend/to_qwen32/rr_acc_commonsense_qa_llama-3.1-8b_qwen32.pdf]

# CommonsenseQA, llama-3.2-1b to Qwen3-32B

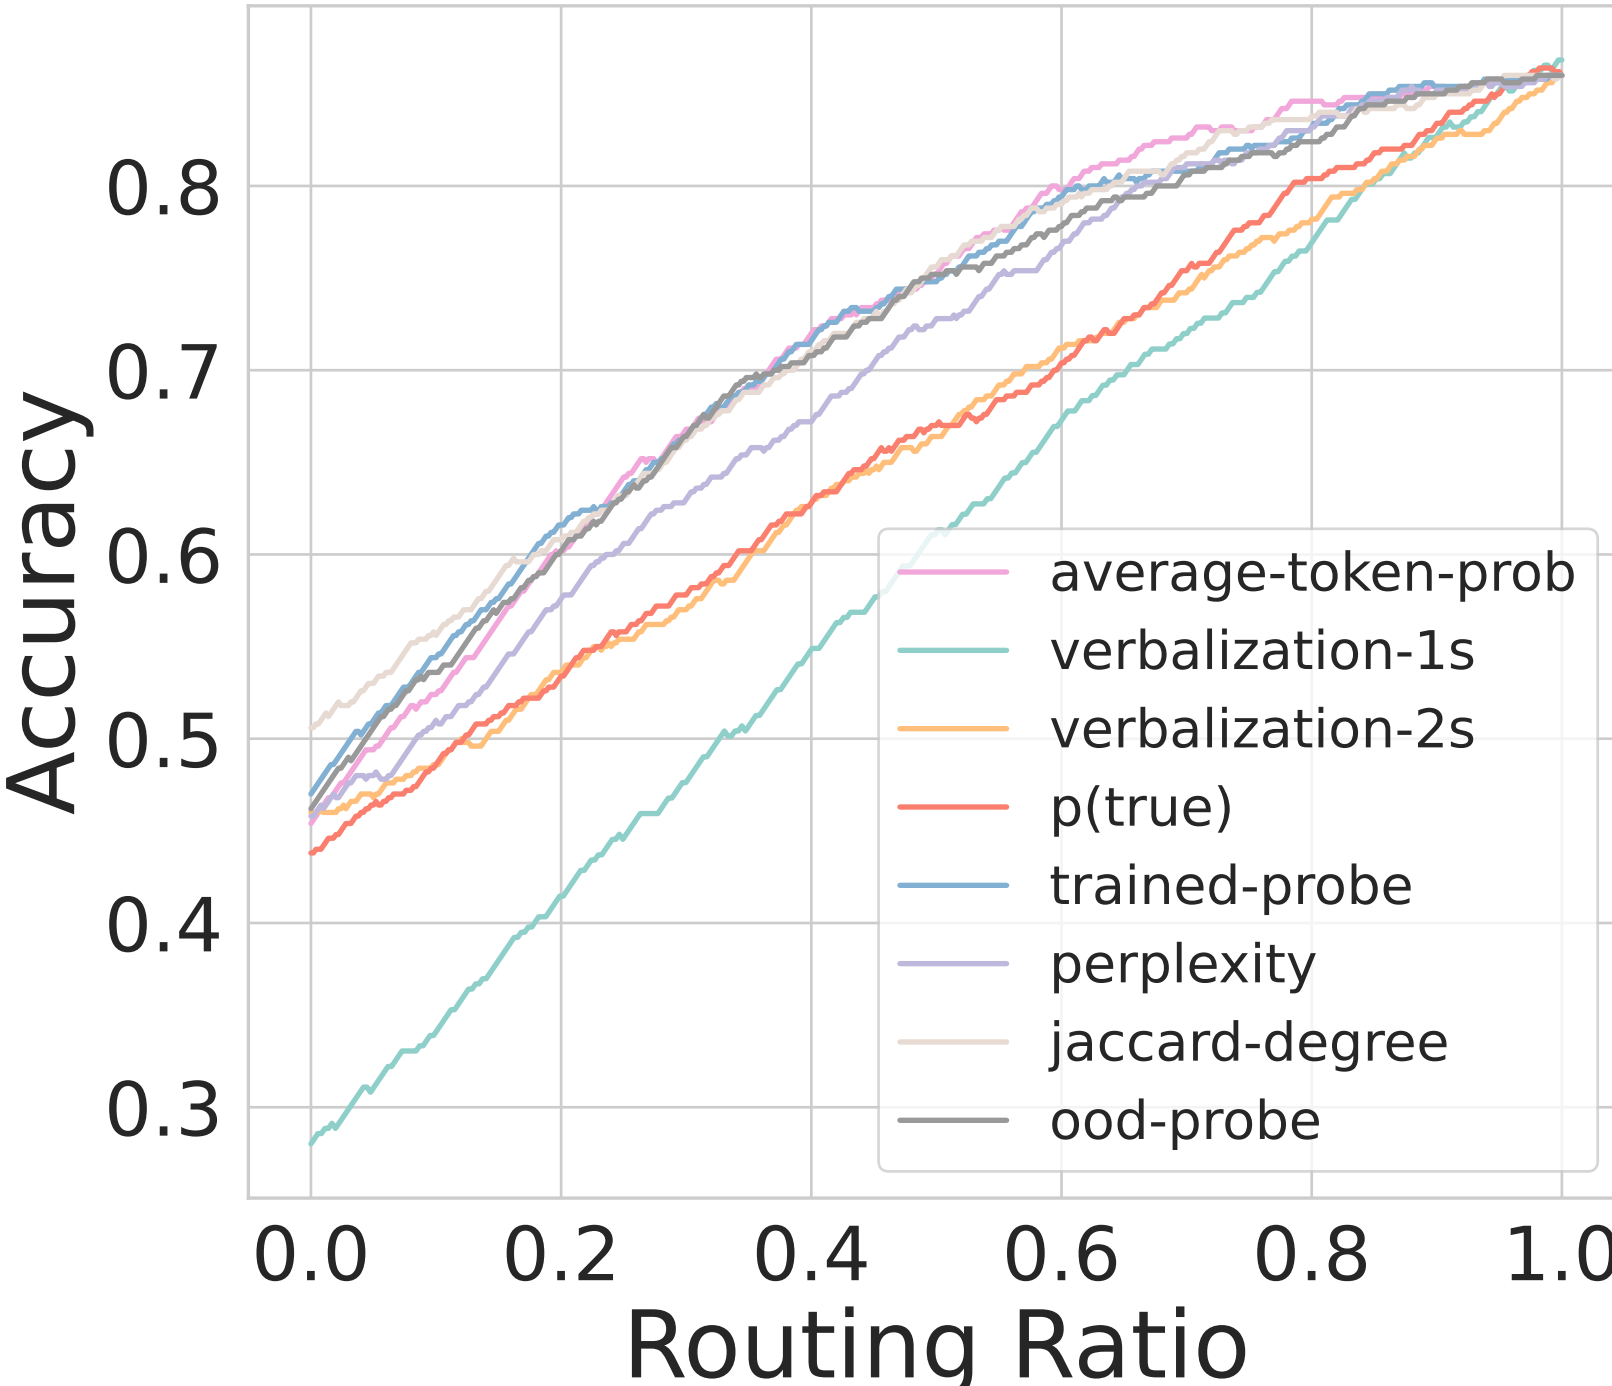

Supplement: supplementary_material [file rr_acc_commonsense_qa_llama-3.2-1b_qwen32.pdf › Routing_SLM_LLMs/Uncertainty-based Routing/w_legend/to_qwen32/rr_acc_commonsense_qa_llama-3.2-1b_qwen32.pdf]

# CommonsenseQA, llama-3.2-3b to Qwen3-32B

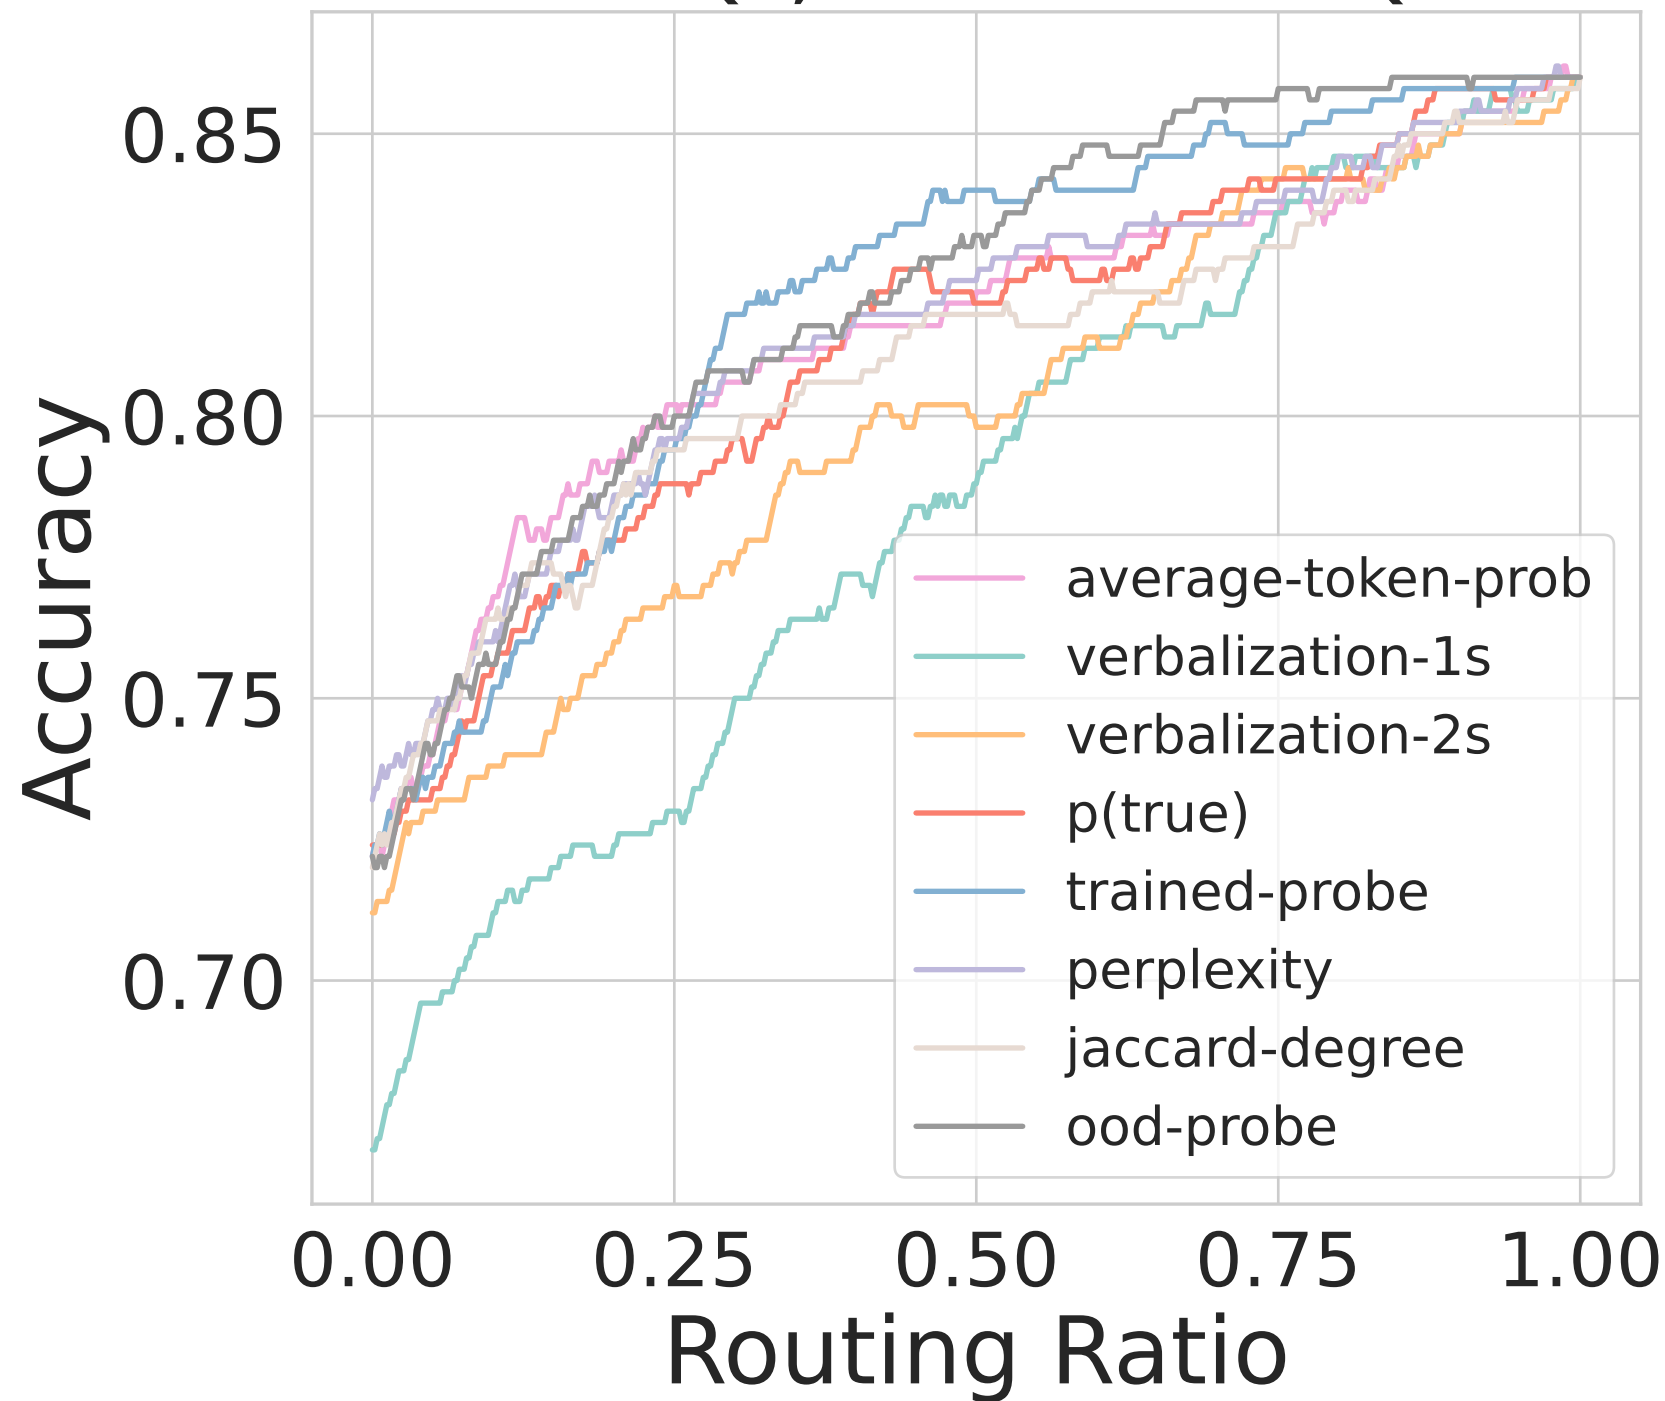

Supplement: supplementary_material [file rr_acc_commonsense_qa_llama-3.2-3b_qwen32.pdf › Routing_SLM_LLMs/Uncertainty-based Routing/w_legend/to_qwen32/rr_acc_commonsense_qa_llama-3.2-3b_qwen32.pdf]

# CommonsenseQA, mistral-7b to Qwen3-32B

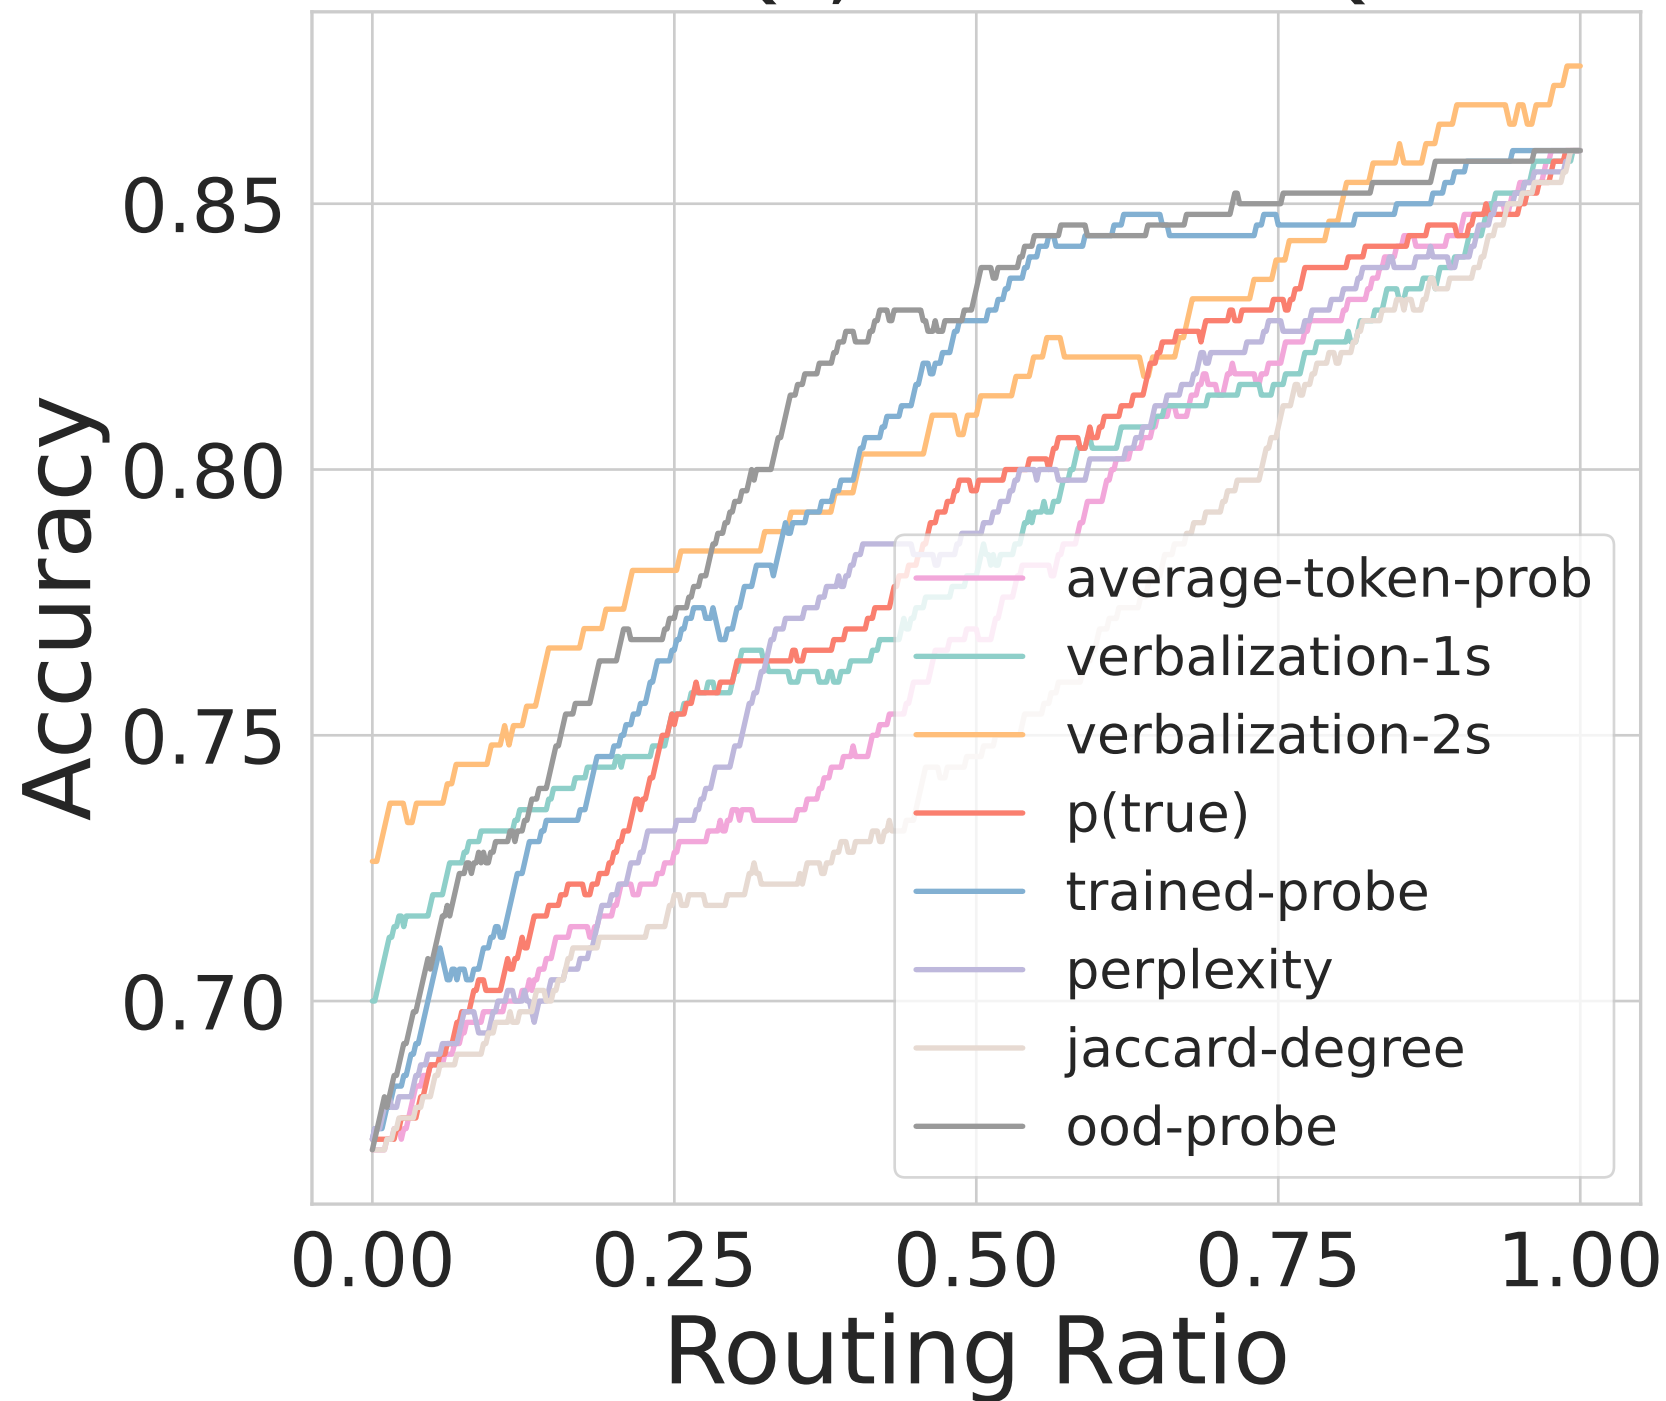

Supplement: supplementary_material [file rr_acc_commonsense_qa_mistral-7b_qwen32.pdf › Routing_SLM_LLMs/Uncertainty-based Routing/w_legend/to_qwen32/rr_acc_commonsense_qa_mistral-7b_qwen32.pdf]

# CommonsenseQA, phi-3.5-mini to Qwen3-32B

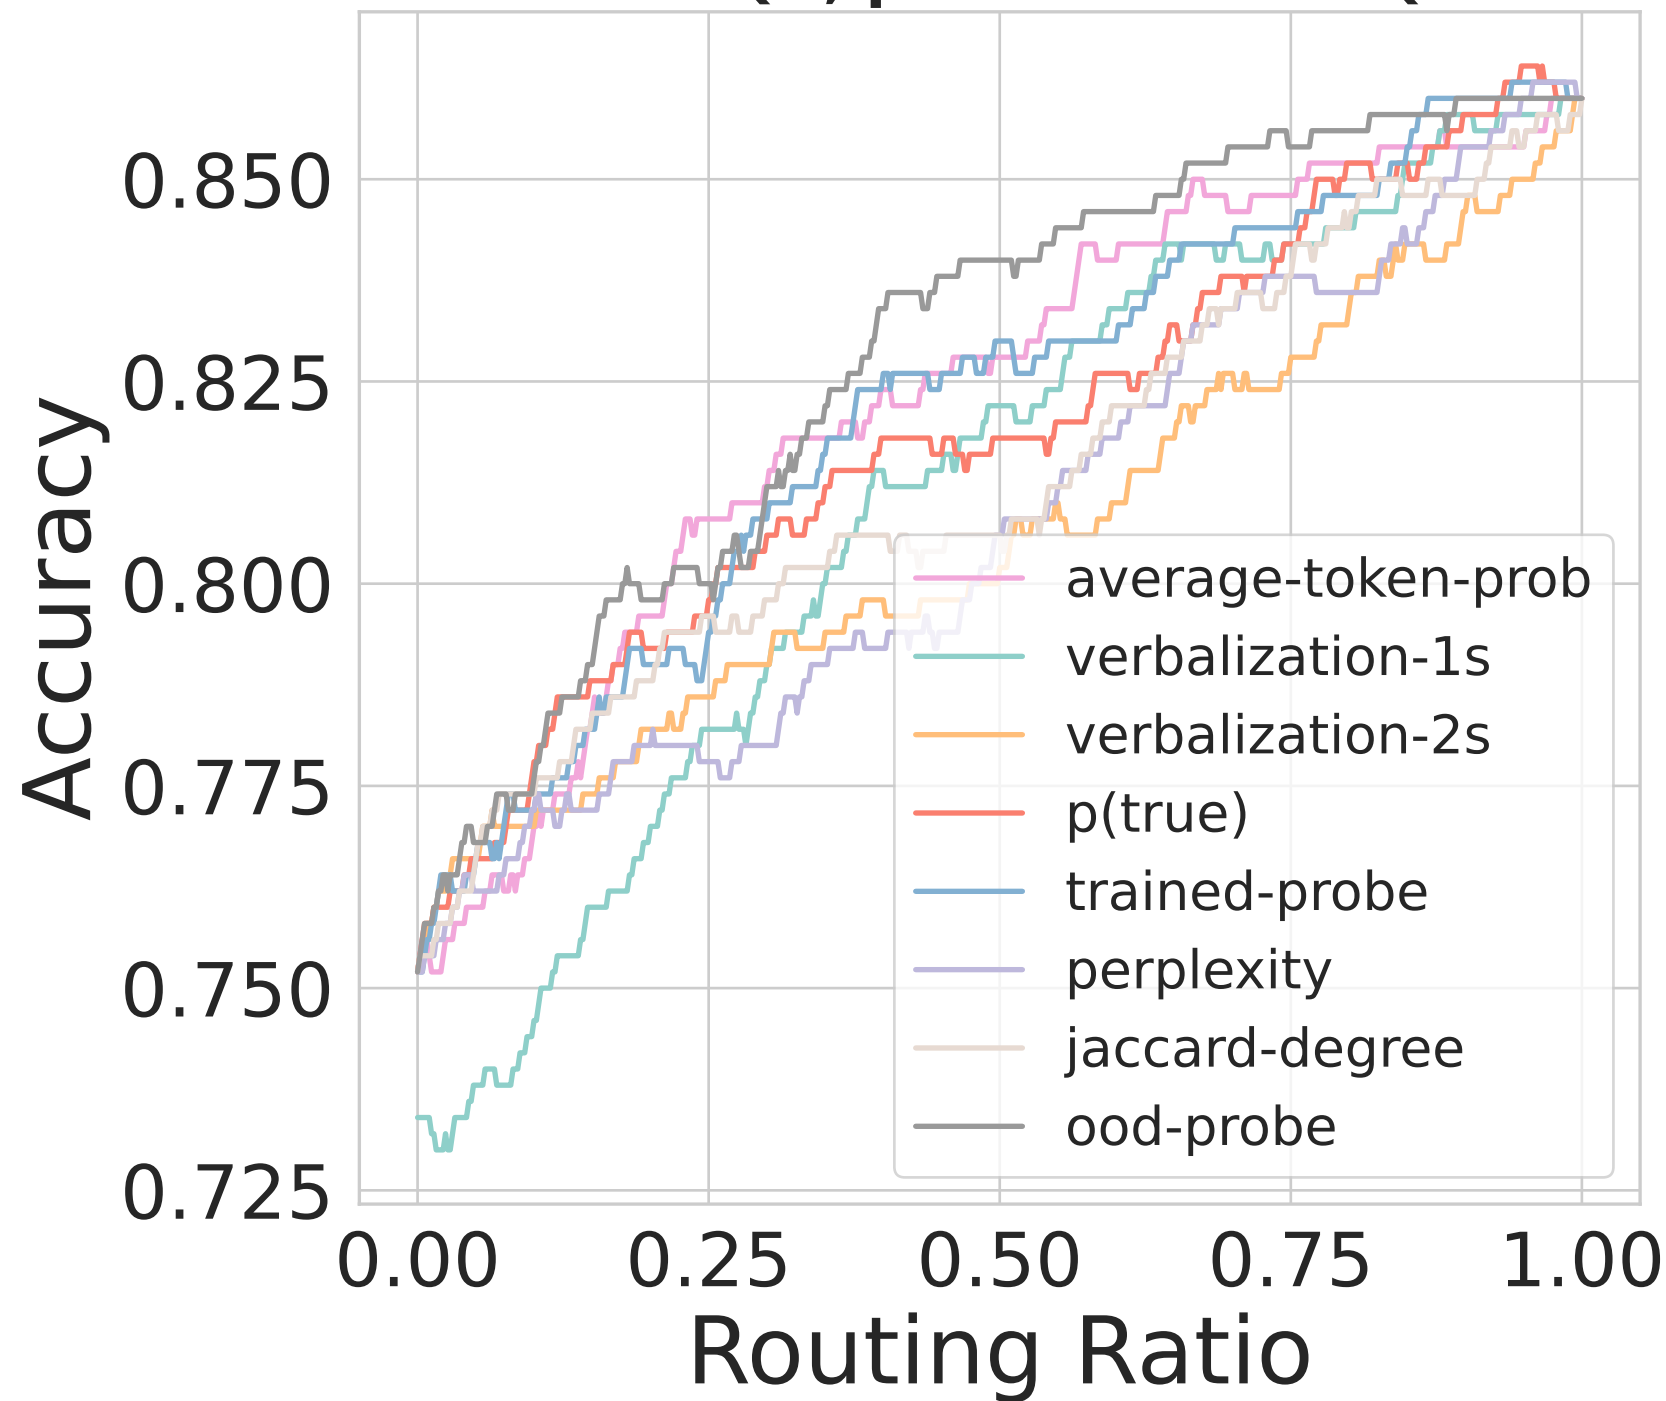

Supplement: supplementary_material [file rr_acc_commonsense_qa_phi-3.5-mini_qwen32.pdf › Routing_SLM_LLMs/Uncertainty-based Routing/w_legend/to_qwen32/rr_acc_commonsense_qa_phi-3.5-mini_qwen32.pdf]

# CommonsenseQA, phi-4-mini-reasoning to Qwen3-32B

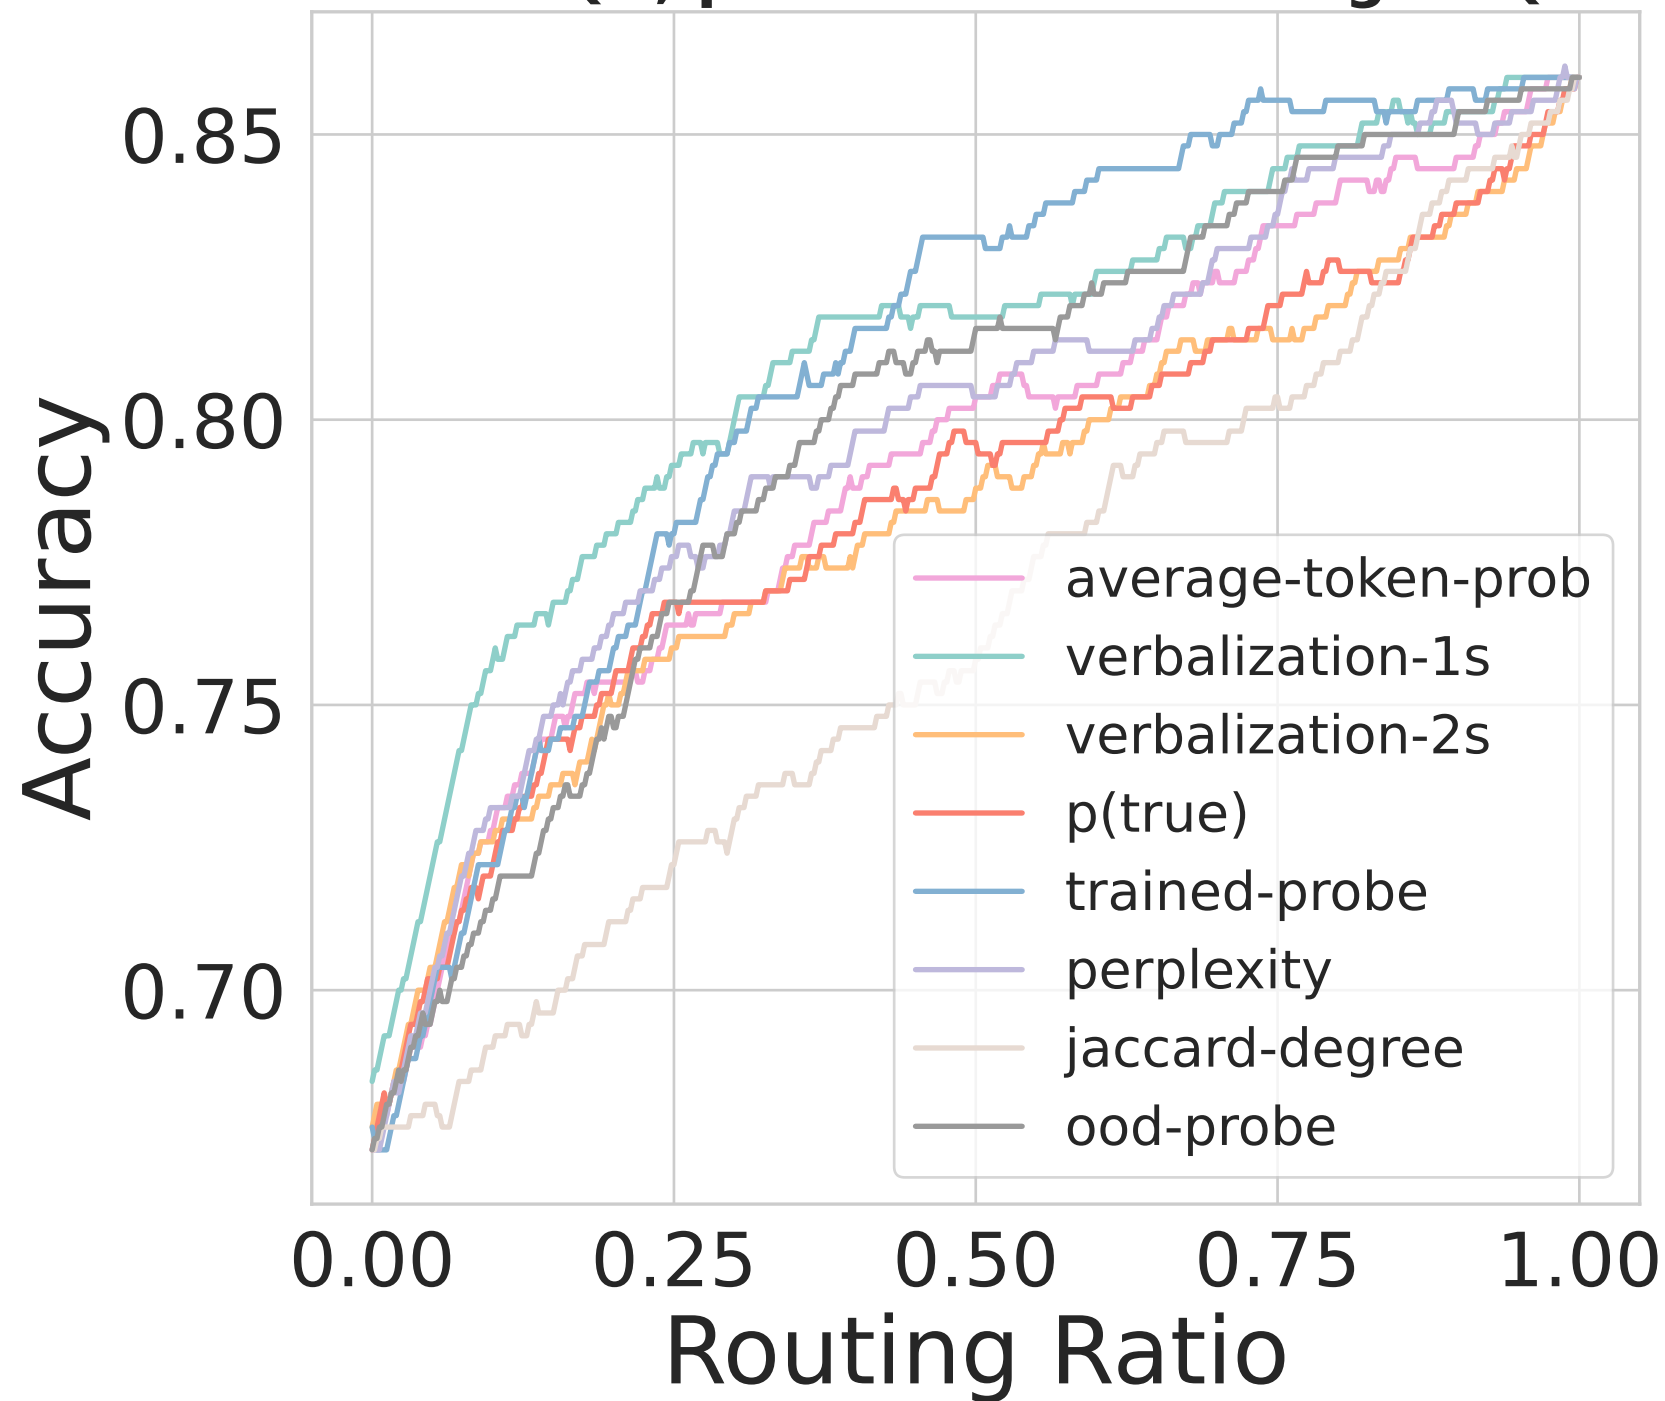

Supplement: supplementary_material [file rr_acc_commonsense_qa_phi-4-mini-reasoning_qwen32.pdf › Routing_SLM_LLMs/Uncertainty-based Routing/w_legend/to_qwen32/rr_acc_commonsense_qa_phi-4-mini-reasoning_qwen32.pdf]

**CommonsenseQA, qwen-2.5-7b to Qwen3-32B**

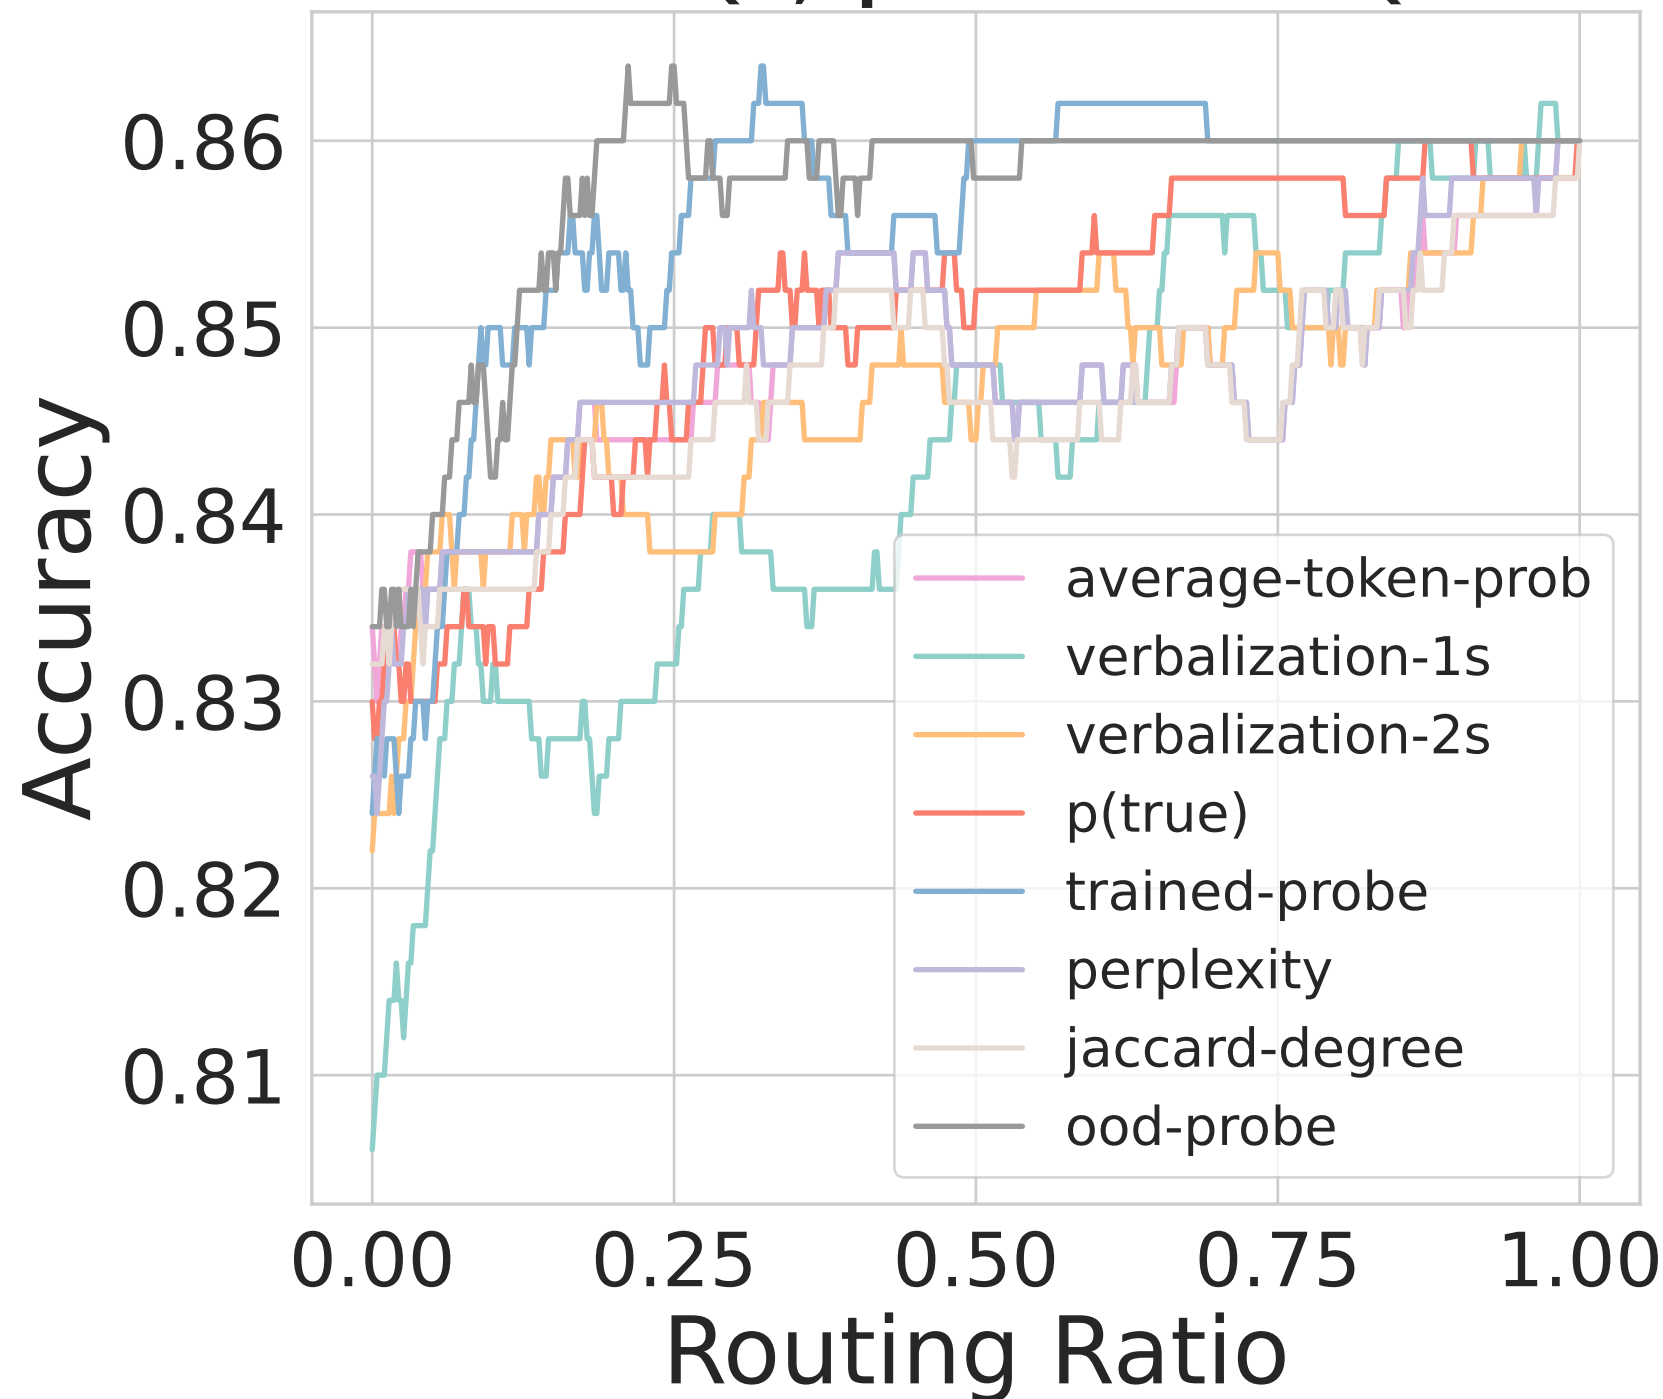

Supplement: supplementary_material [file rr_acc_commonsense_qa_qwen-2.5-7b_qwen32.pdf › Routing_SLM_LLMs/Uncertainty-based Routing/w_legend/to_qwen32/rr_acc_commonsense_qa_qwen-2.5-7b_qwen32.pdf]

## CommonsenseQA, rwkv to Qwen3-32B

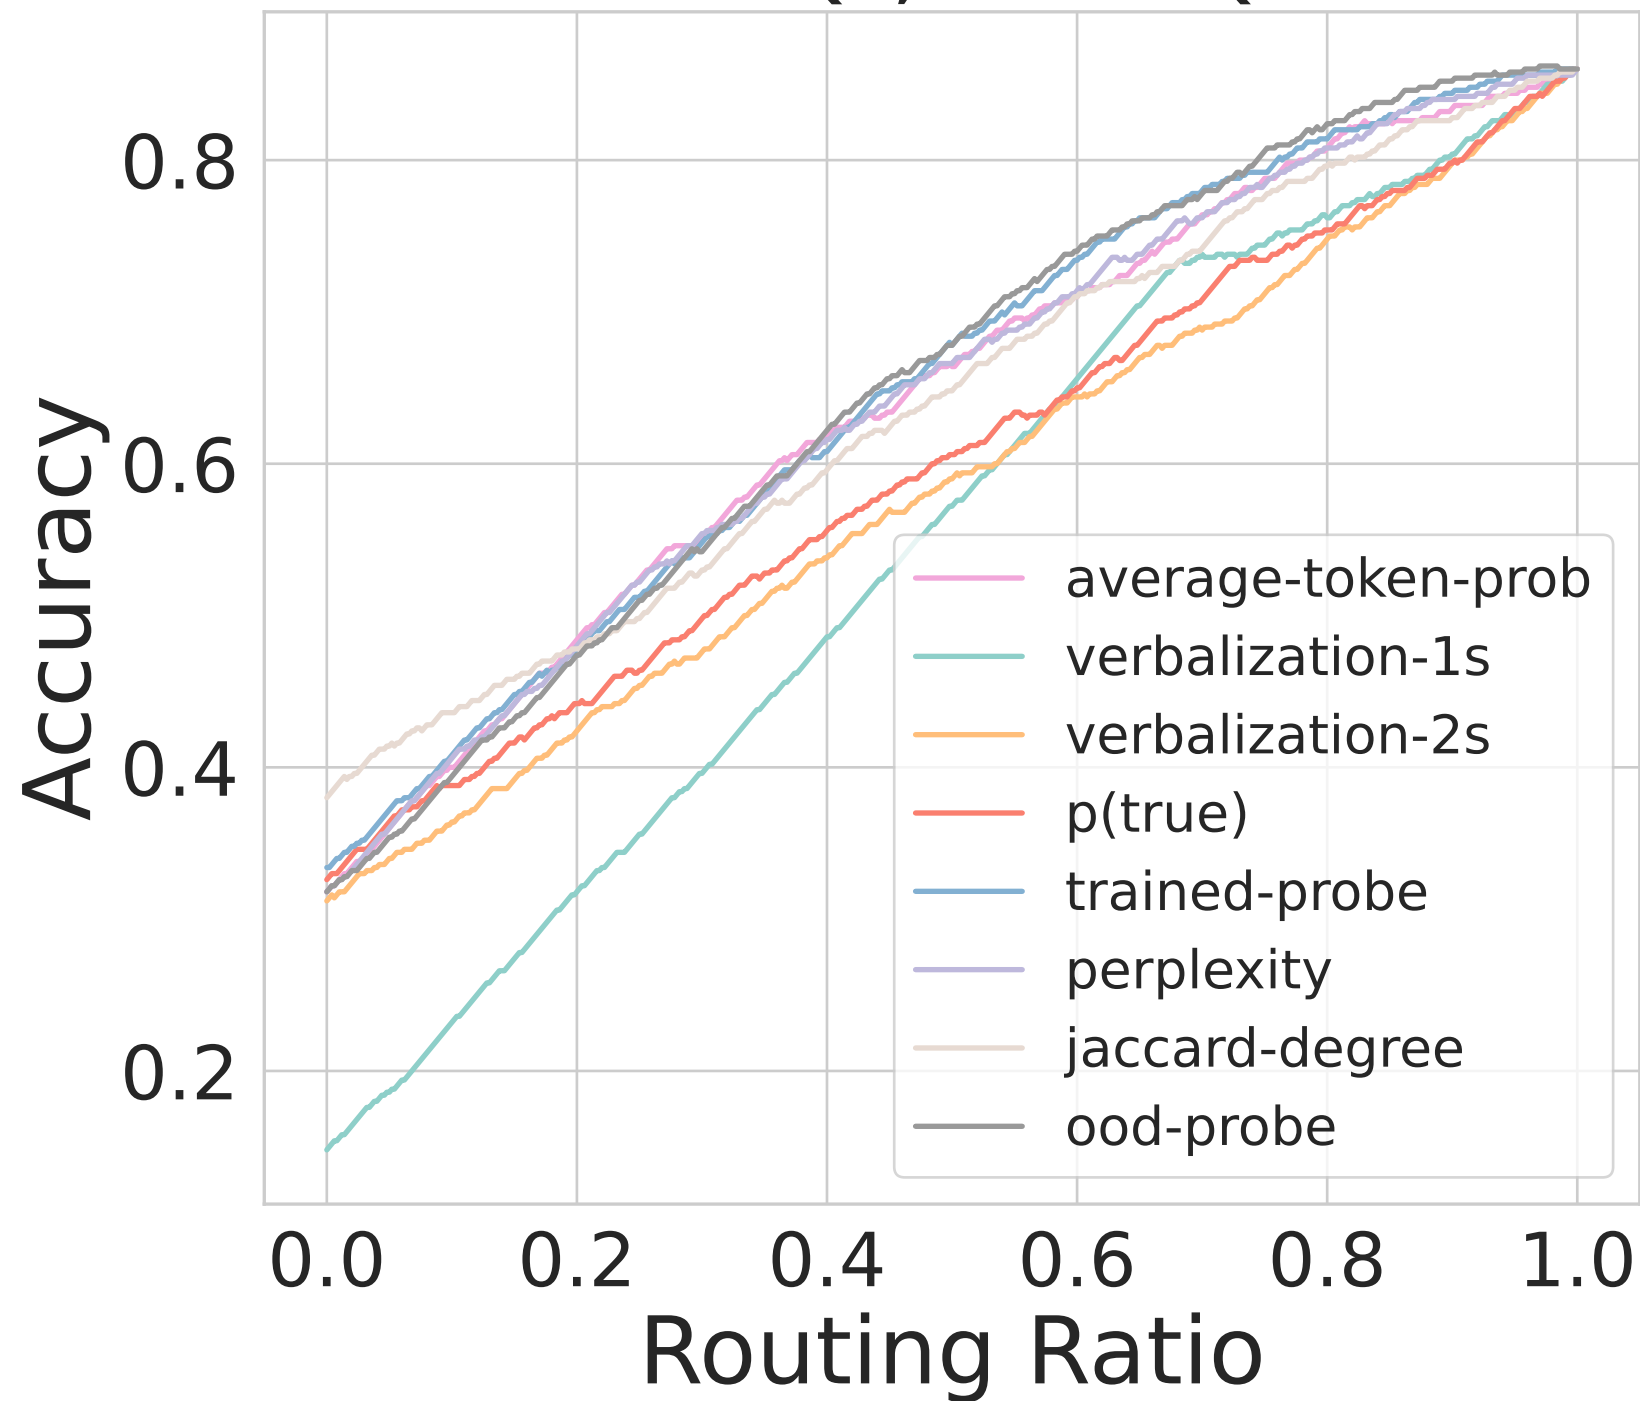

Supplement: supplementary_material [file rr_acc_commonsense_qa_rwkv_qwen32.pdf › Routing_SLM_LLMs/Uncertainty-based Routing/w_legend/to_qwen32/rr_acc_commonsense_qa_rwkv_qwen32.pdf]

## GSM8K, Qwen3-0.6B to Qwen3-32B

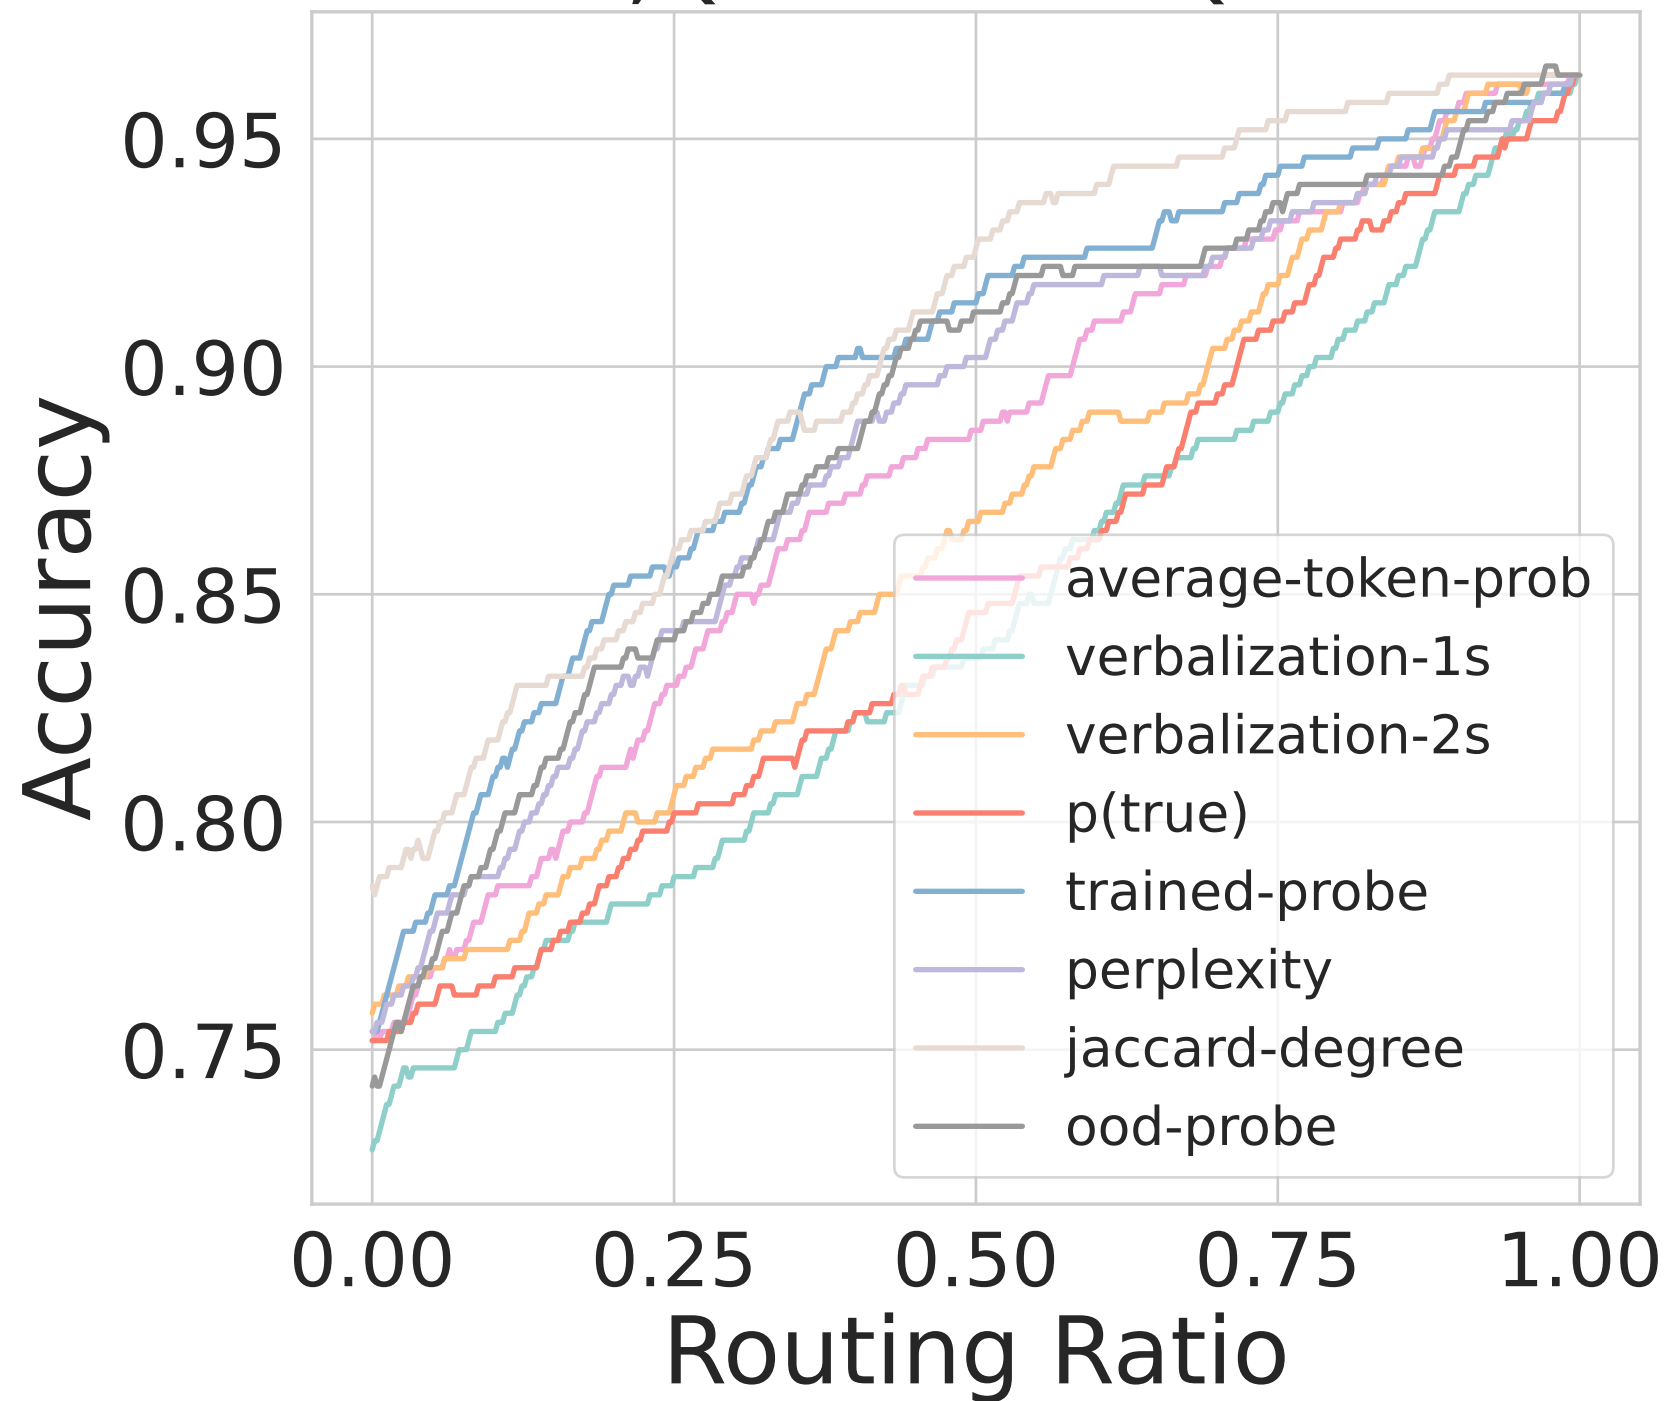

Supplement: supplementary_material [file rr_acc_gsm8k_Qwen3-0.6B_qwen32.pdf › Routing_SLM_LLMs/Uncertainty-based Routing/w_legend/to_qwen32/rr_acc_gsm8k_Qwen3-0.6B_qwen32.pdf]

**GSM8K, Qwen3-1.7B to Qwen3-32B**

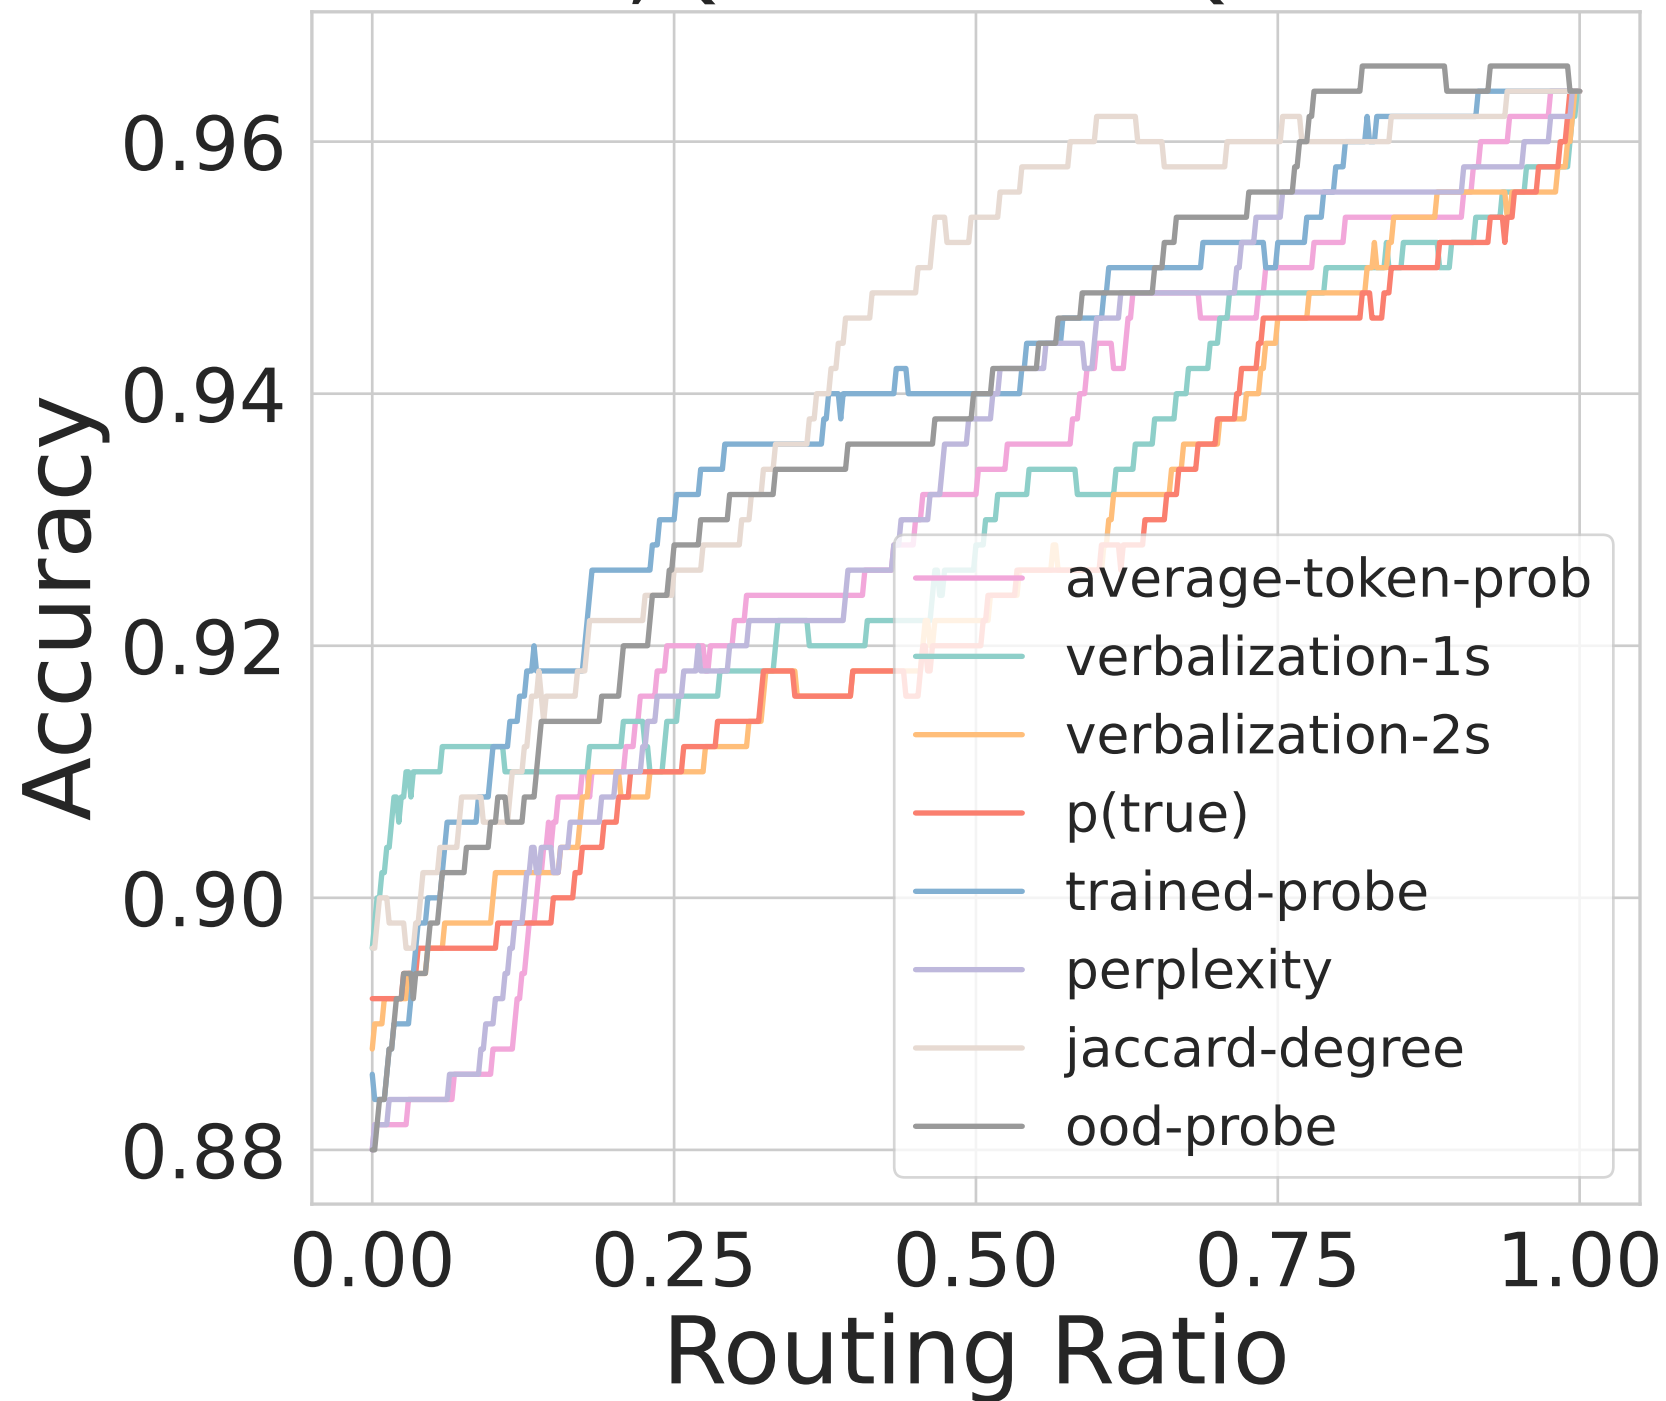

Supplement: supplementary_material [file rr_acc_gsm8k_Qwen3-1.7B_qwen32.pdf › Routing_SLM_LLMs/Uncertainty-based Routing/w_legend/to_qwen32/rr_acc_gsm8k_Qwen3-1.7B_qwen32.pdf]

## GSM8K, Qwen3-4B to Qwen3-32B

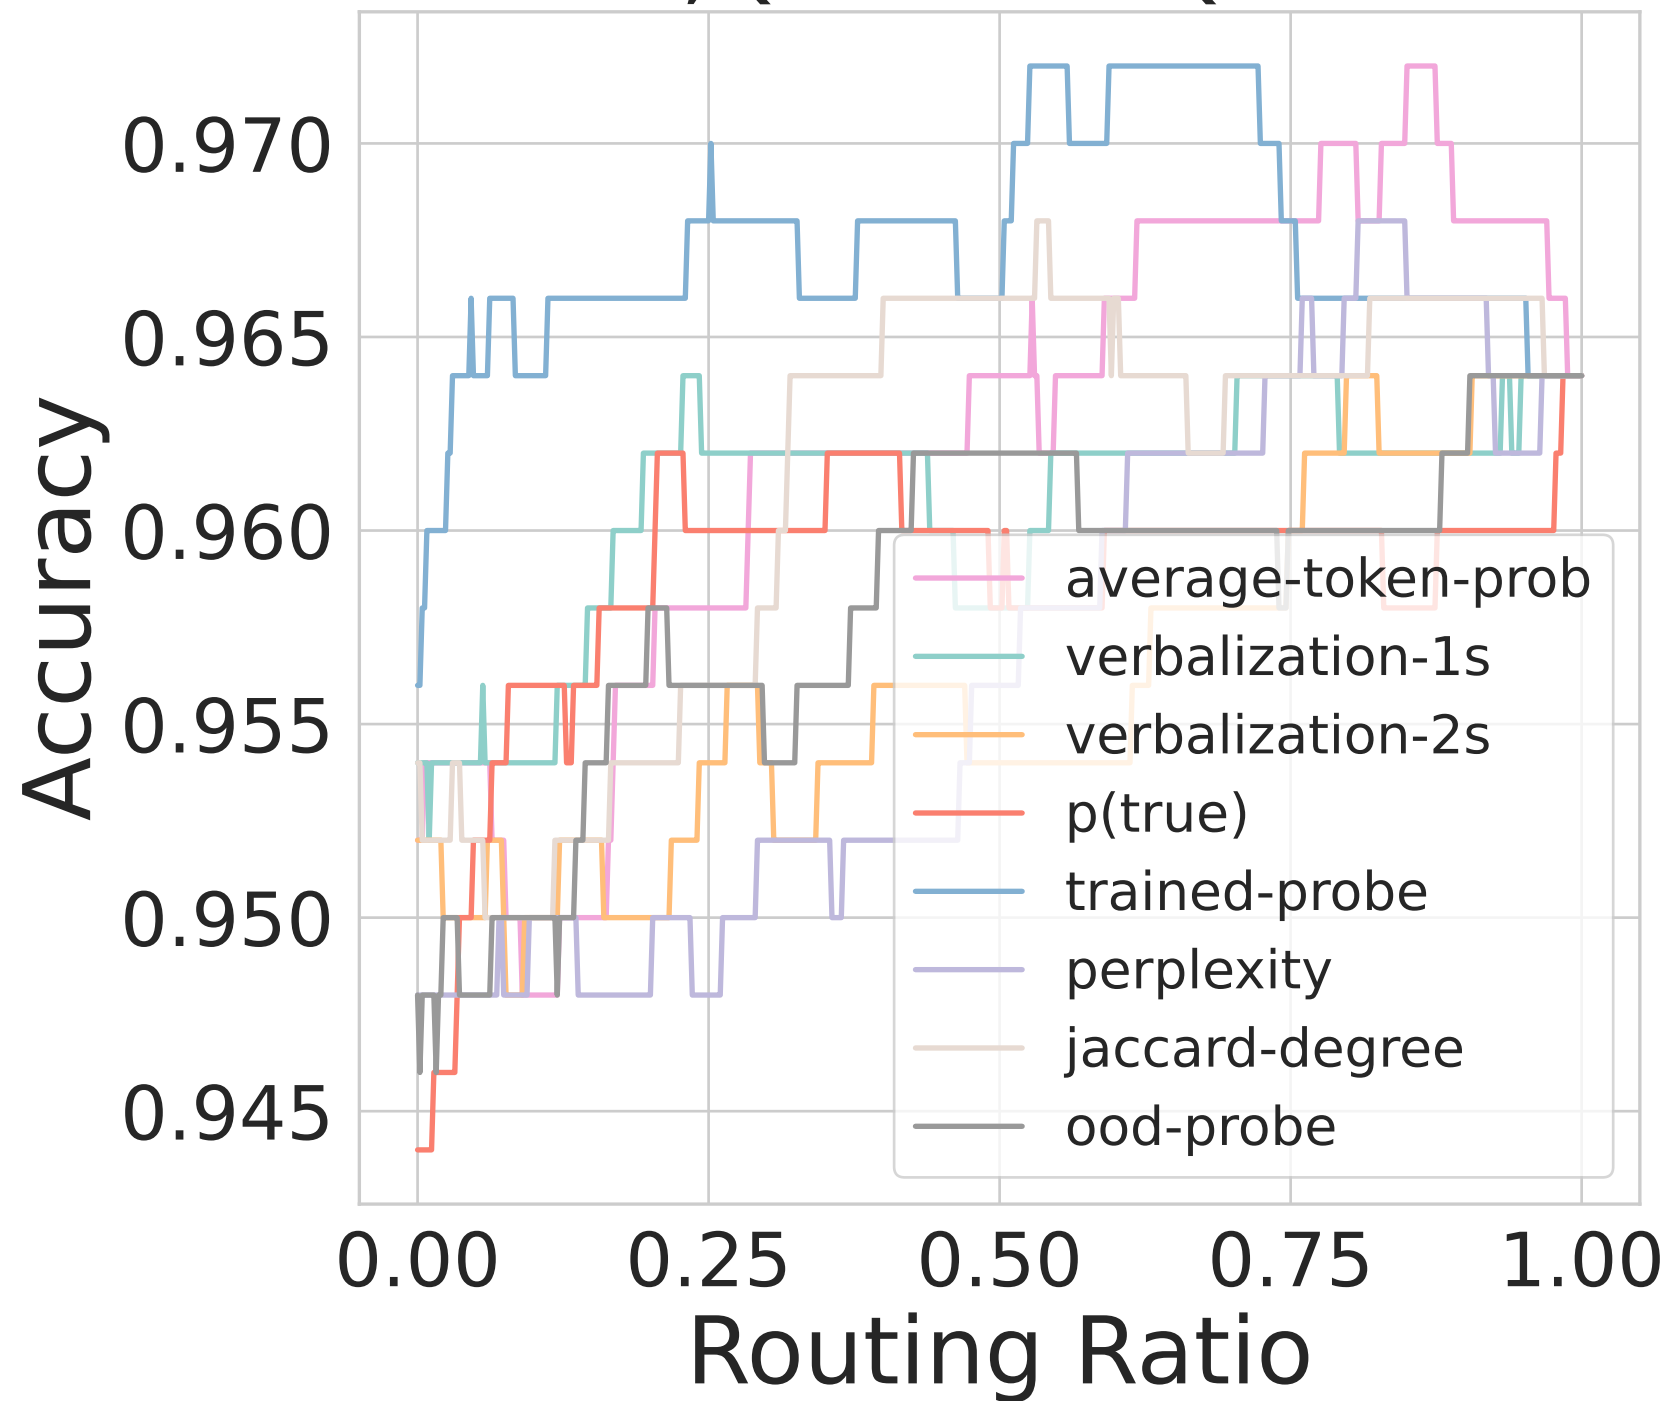

Supplement: supplementary_material [file rr_acc_gsm8k_Qwen3-4B_qwen32.pdf › Routing_SLM_LLMs/Uncertainty-based Routing/w_legend/to_qwen32/rr_acc_gsm8k_Qwen3-4B_qwen32.pdf]

# GSM8K, granite-3.1-8b to Qwen3-32B

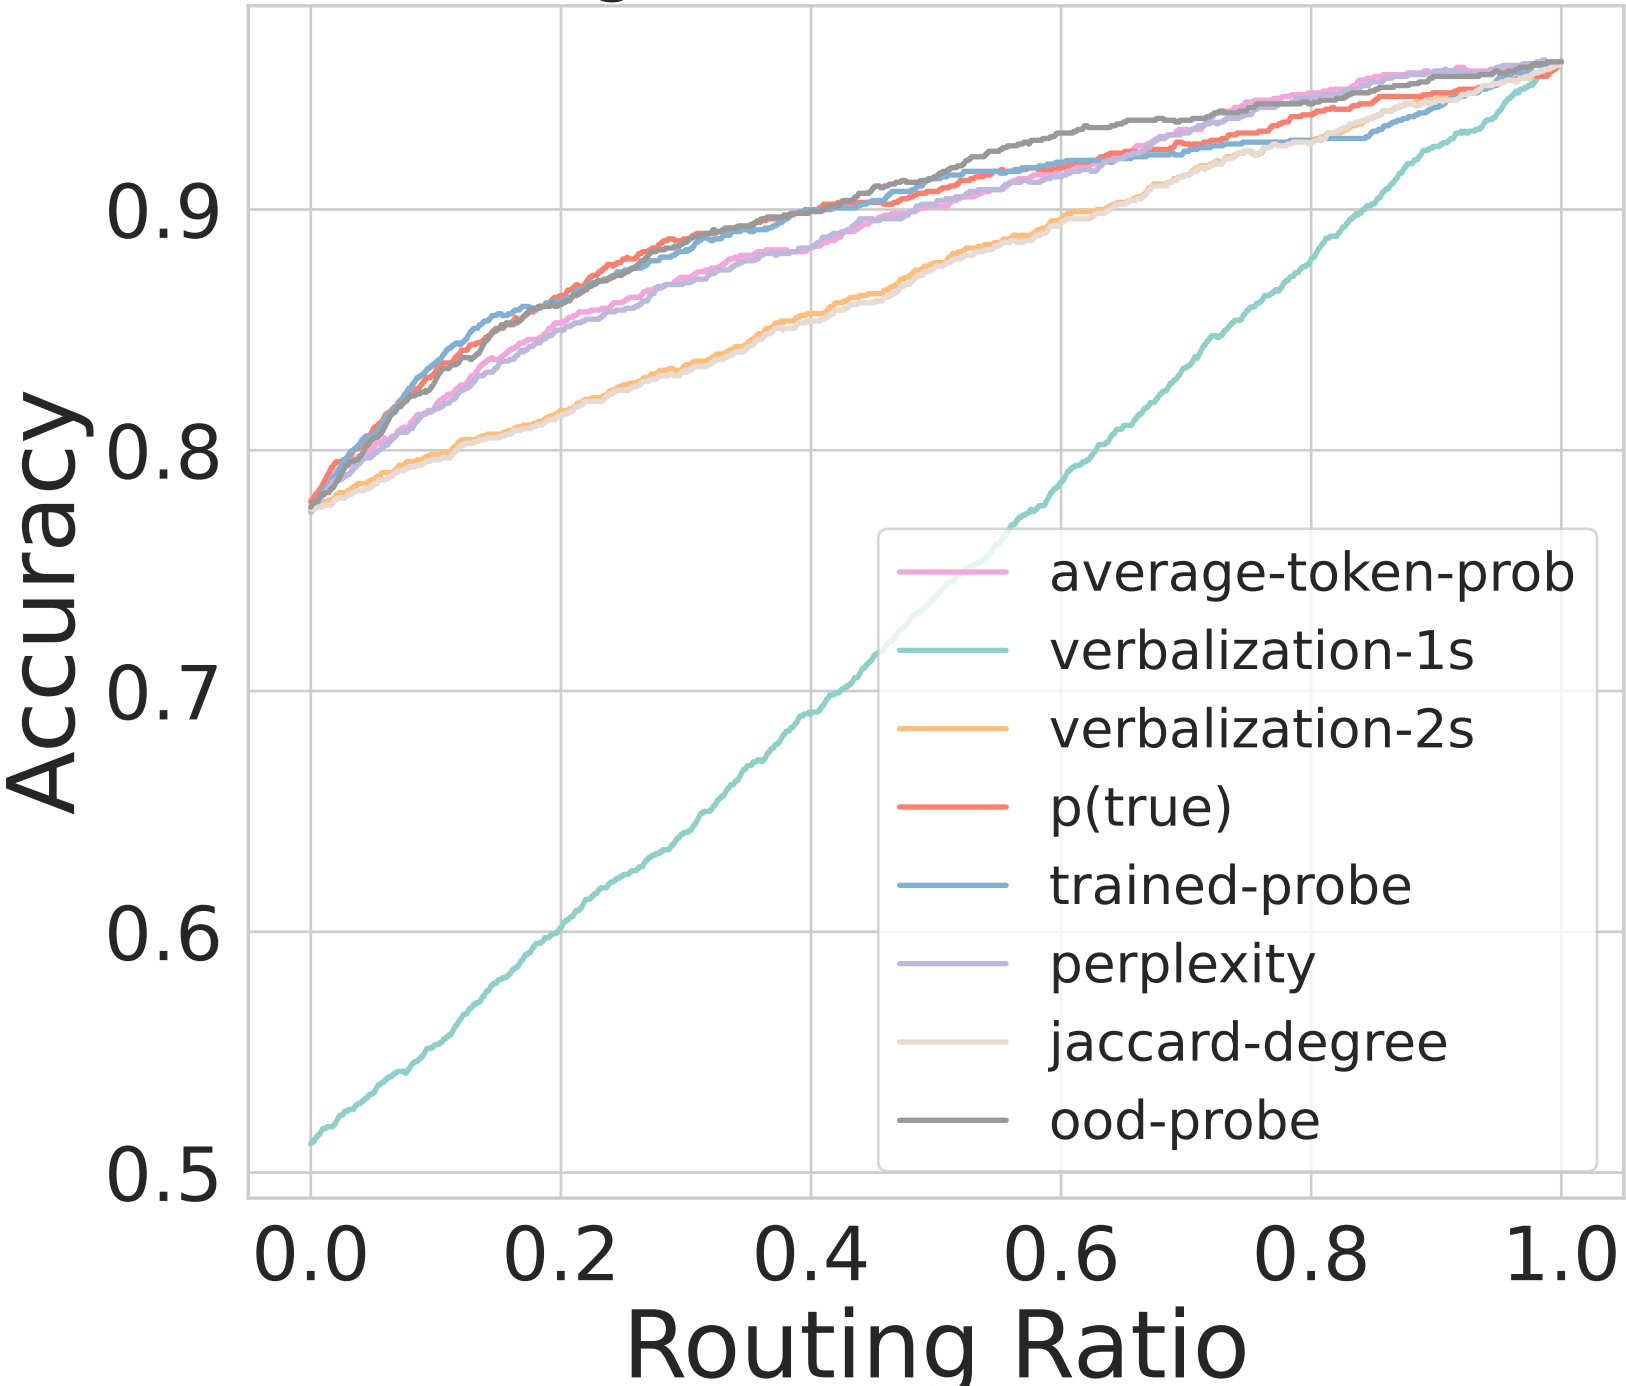

Supplement: supplementary_material [file rr_acc_gsm8k_granite-3.1-8b_qwen32.pdf › Routing_SLM_LLMs/Uncertainty-based Routing/w_legend/to_qwen32/rr_acc_gsm8k_granite-3.1-8b_qwen32.pdf]

## GSM8K, llama-3.1-8b to Qwen3-32B

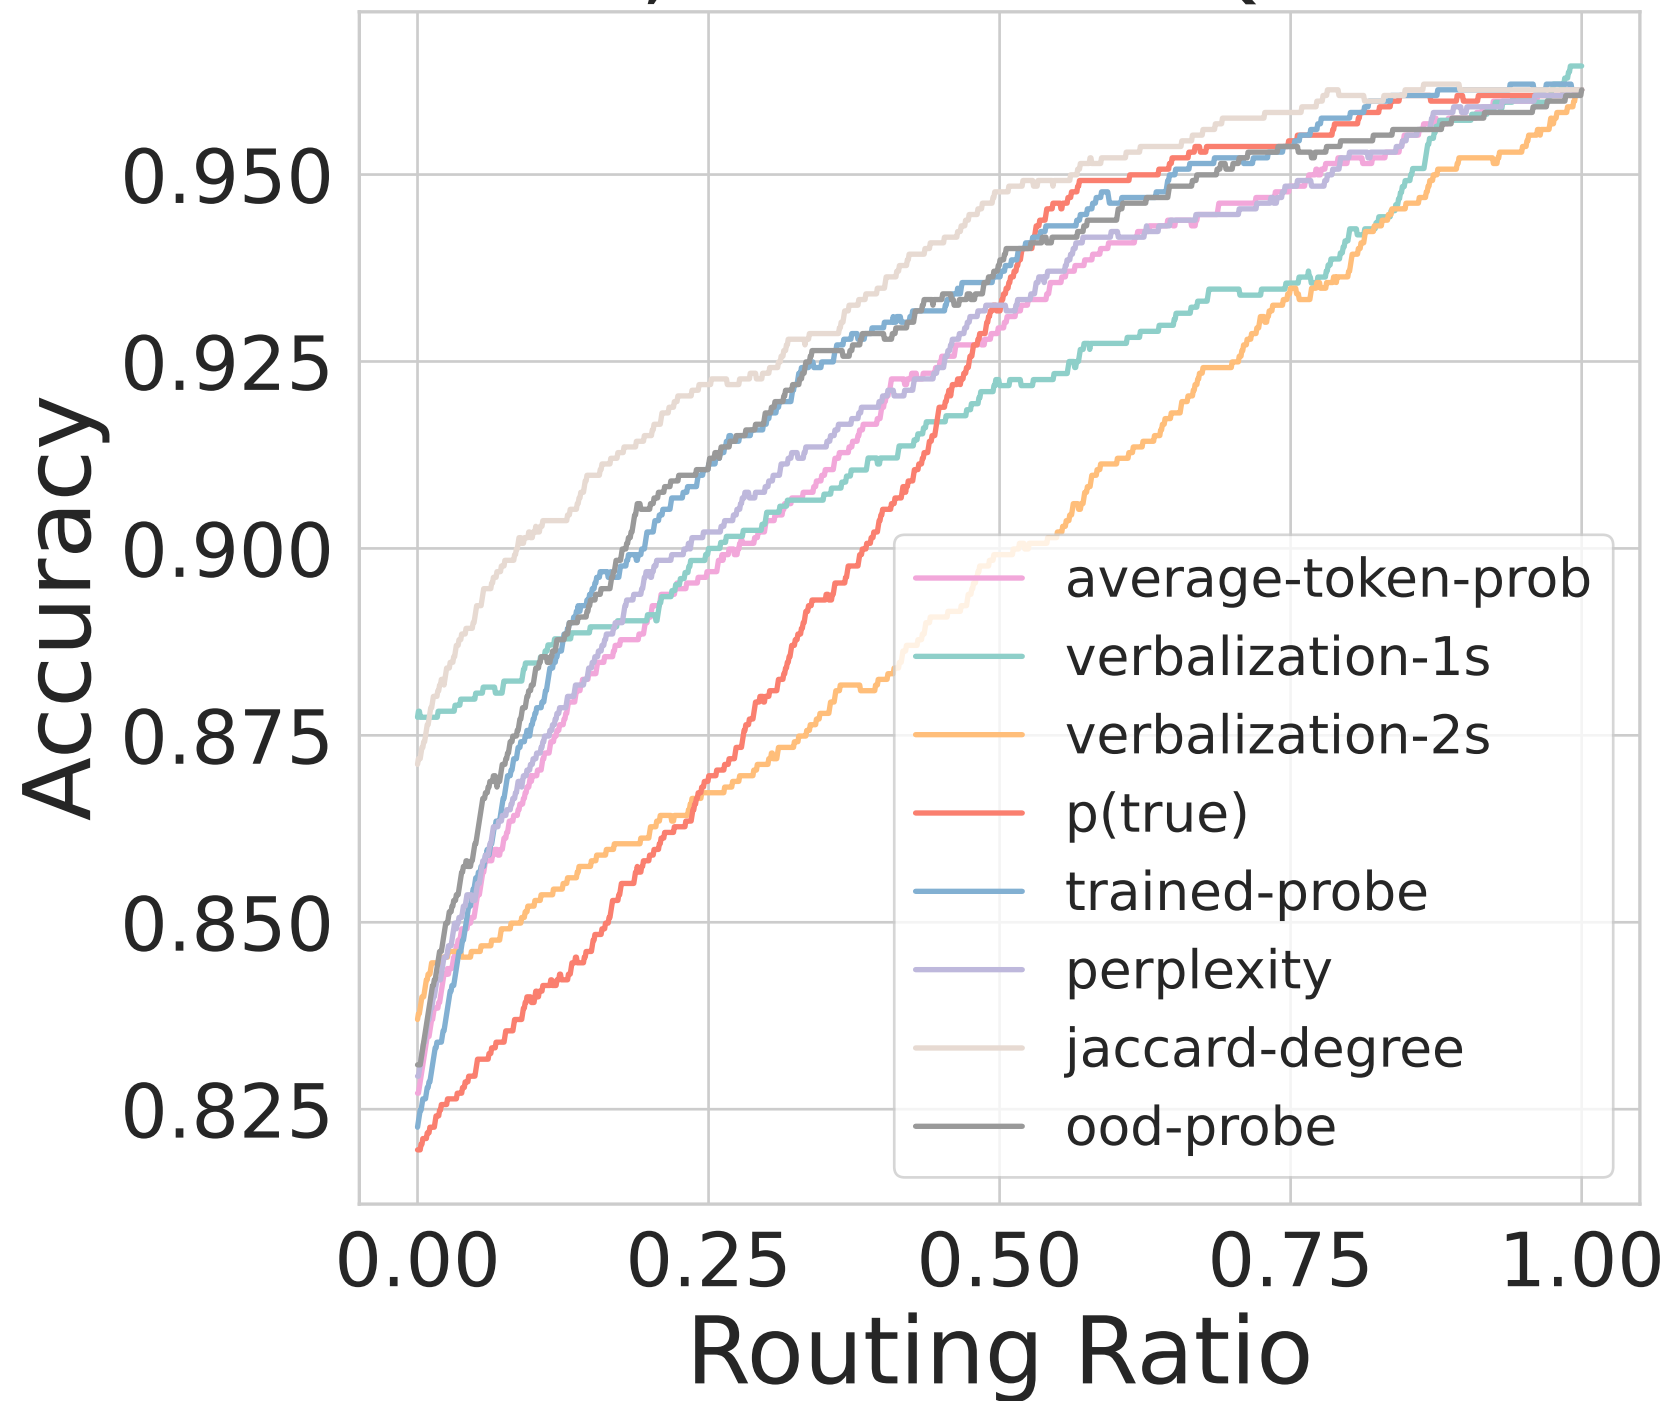

Supplement: supplementary_material [file rr_acc_gsm8k_llama-3.1-8b_qwen32.pdf › Routing_SLM_LLMs/Uncertainty-based Routing/w_legend/to_qwen32/rr_acc_gsm8k_llama-3.1-8b_qwen32.pdf]

# GSM8K, llama-3.2-1b to Qwen3-32B

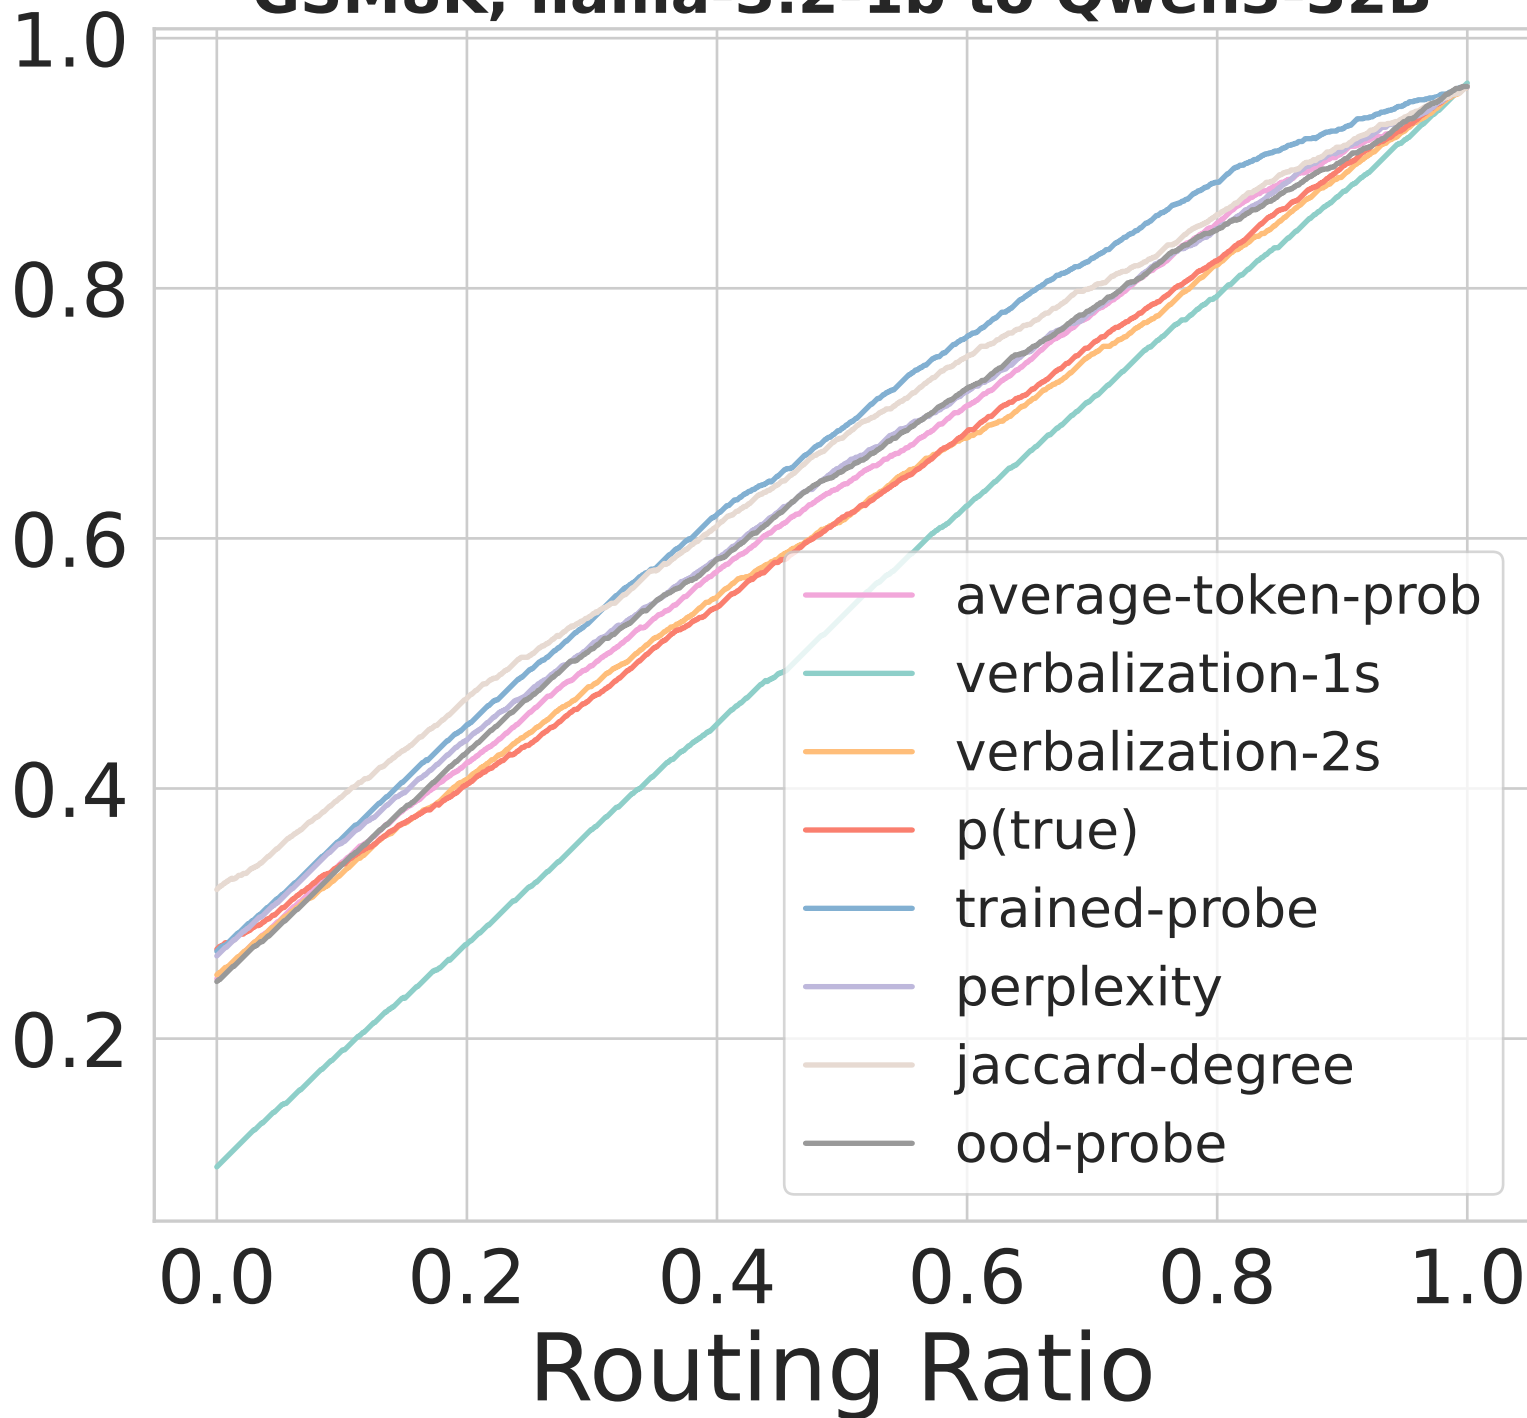

Supplement: supplementary_material [file rr_acc_gsm8k_llama-3.2-1b_qwen32.pdf › Routing_SLM_LLMs/Uncertainty-based Routing/w_legend/to_qwen32/rr_acc_gsm8k_llama-3.2-1b_qwen32.pdf]

**GSM8K, llama-3.2-3b to Qwen3-32B**

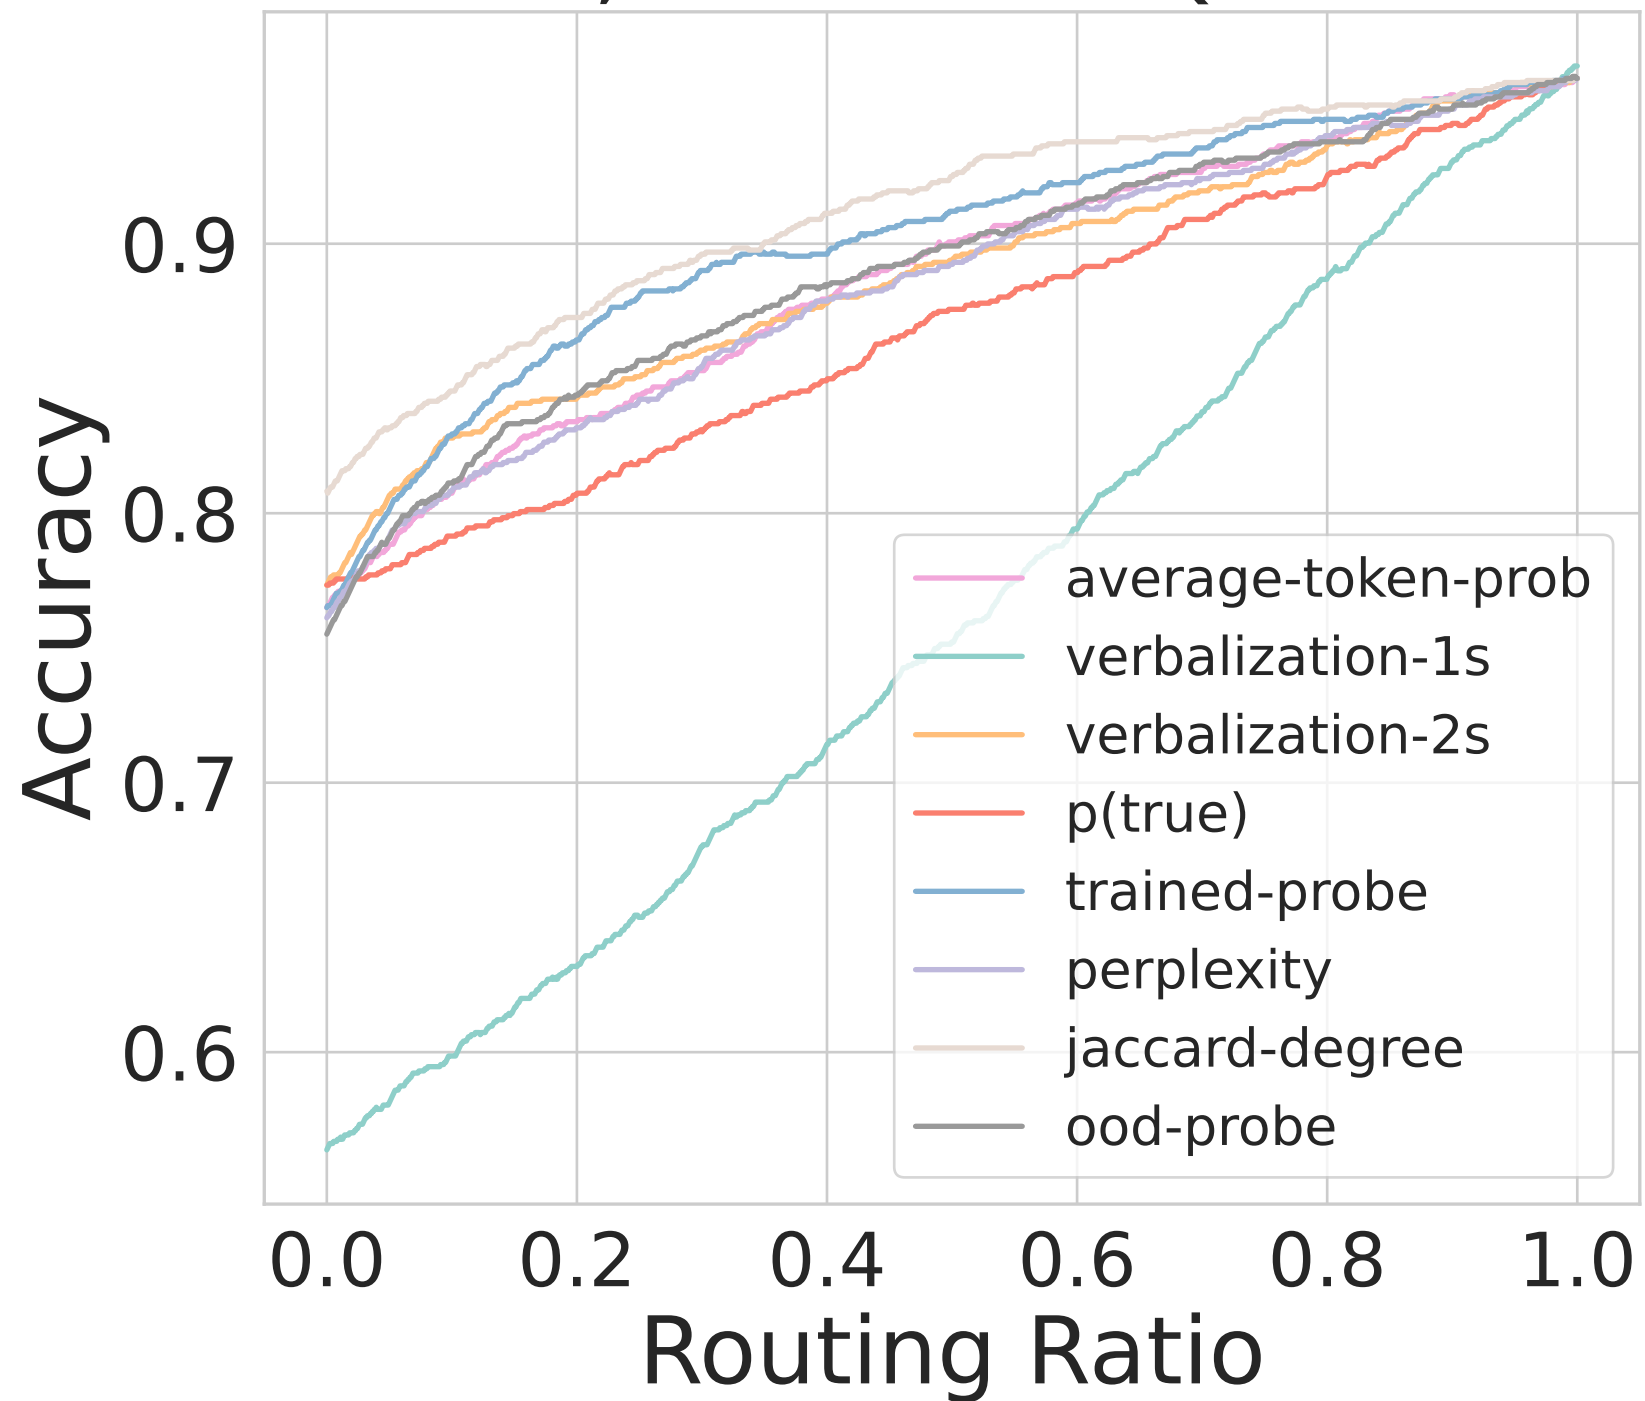

Supplement: supplementary_material [file rr_acc_gsm8k_llama-3.2-3b_qwen32.pdf › Routing_SLM_LLMs/Uncertainty-based Routing/w_legend/to_qwen32/rr_acc_gsm8k_llama-3.2-3b_qwen32.pdf]

# GSM8K, mistral-7b to Qwen3-32B

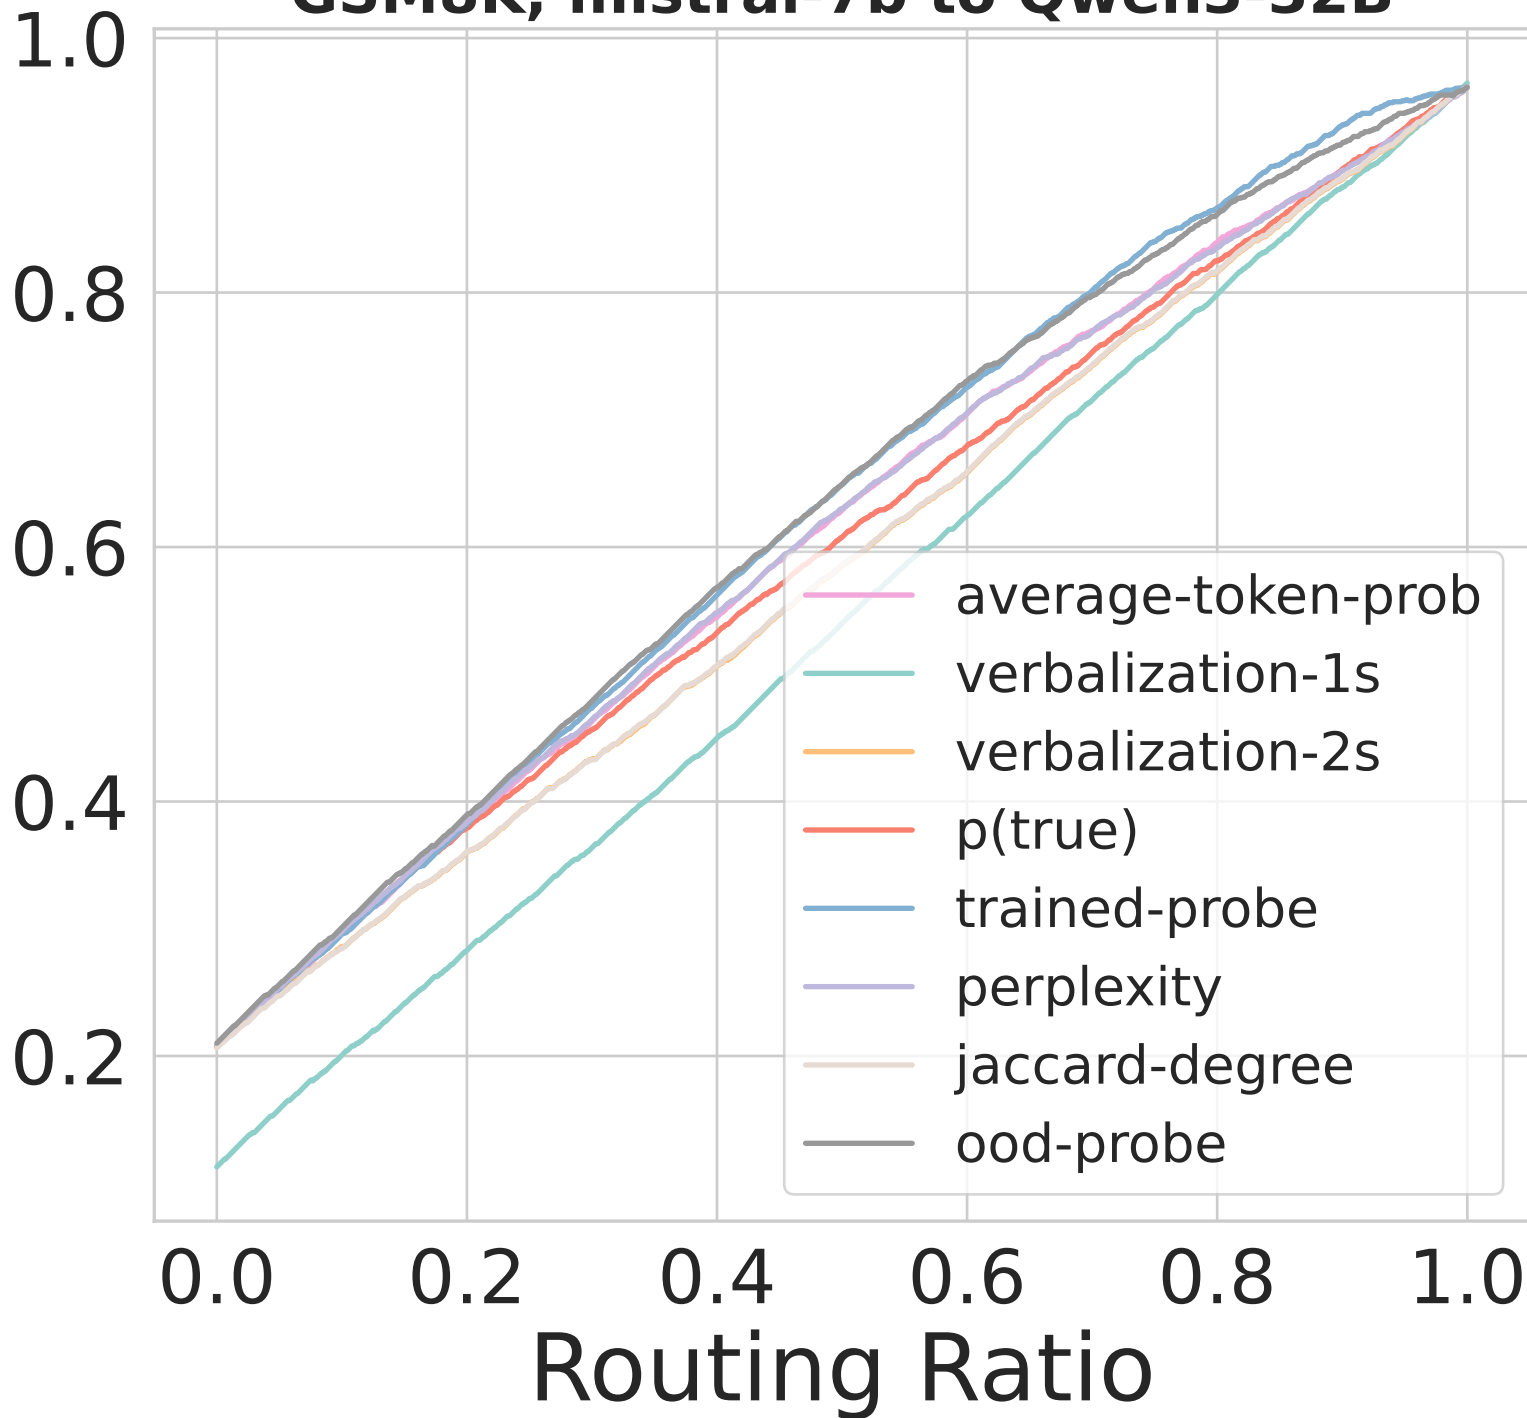

Supplement: supplementary_material [file rr_acc_gsm8k_mistral-7b_qwen32.pdf › Routing_SLM_LLMs/Uncertainty-based Routing/w_legend/to_qwen32/rr_acc_gsm8k_mistral-7b_qwen32.pdf]

# GSM8K, phi-3.5-mini to Qwen3-32B

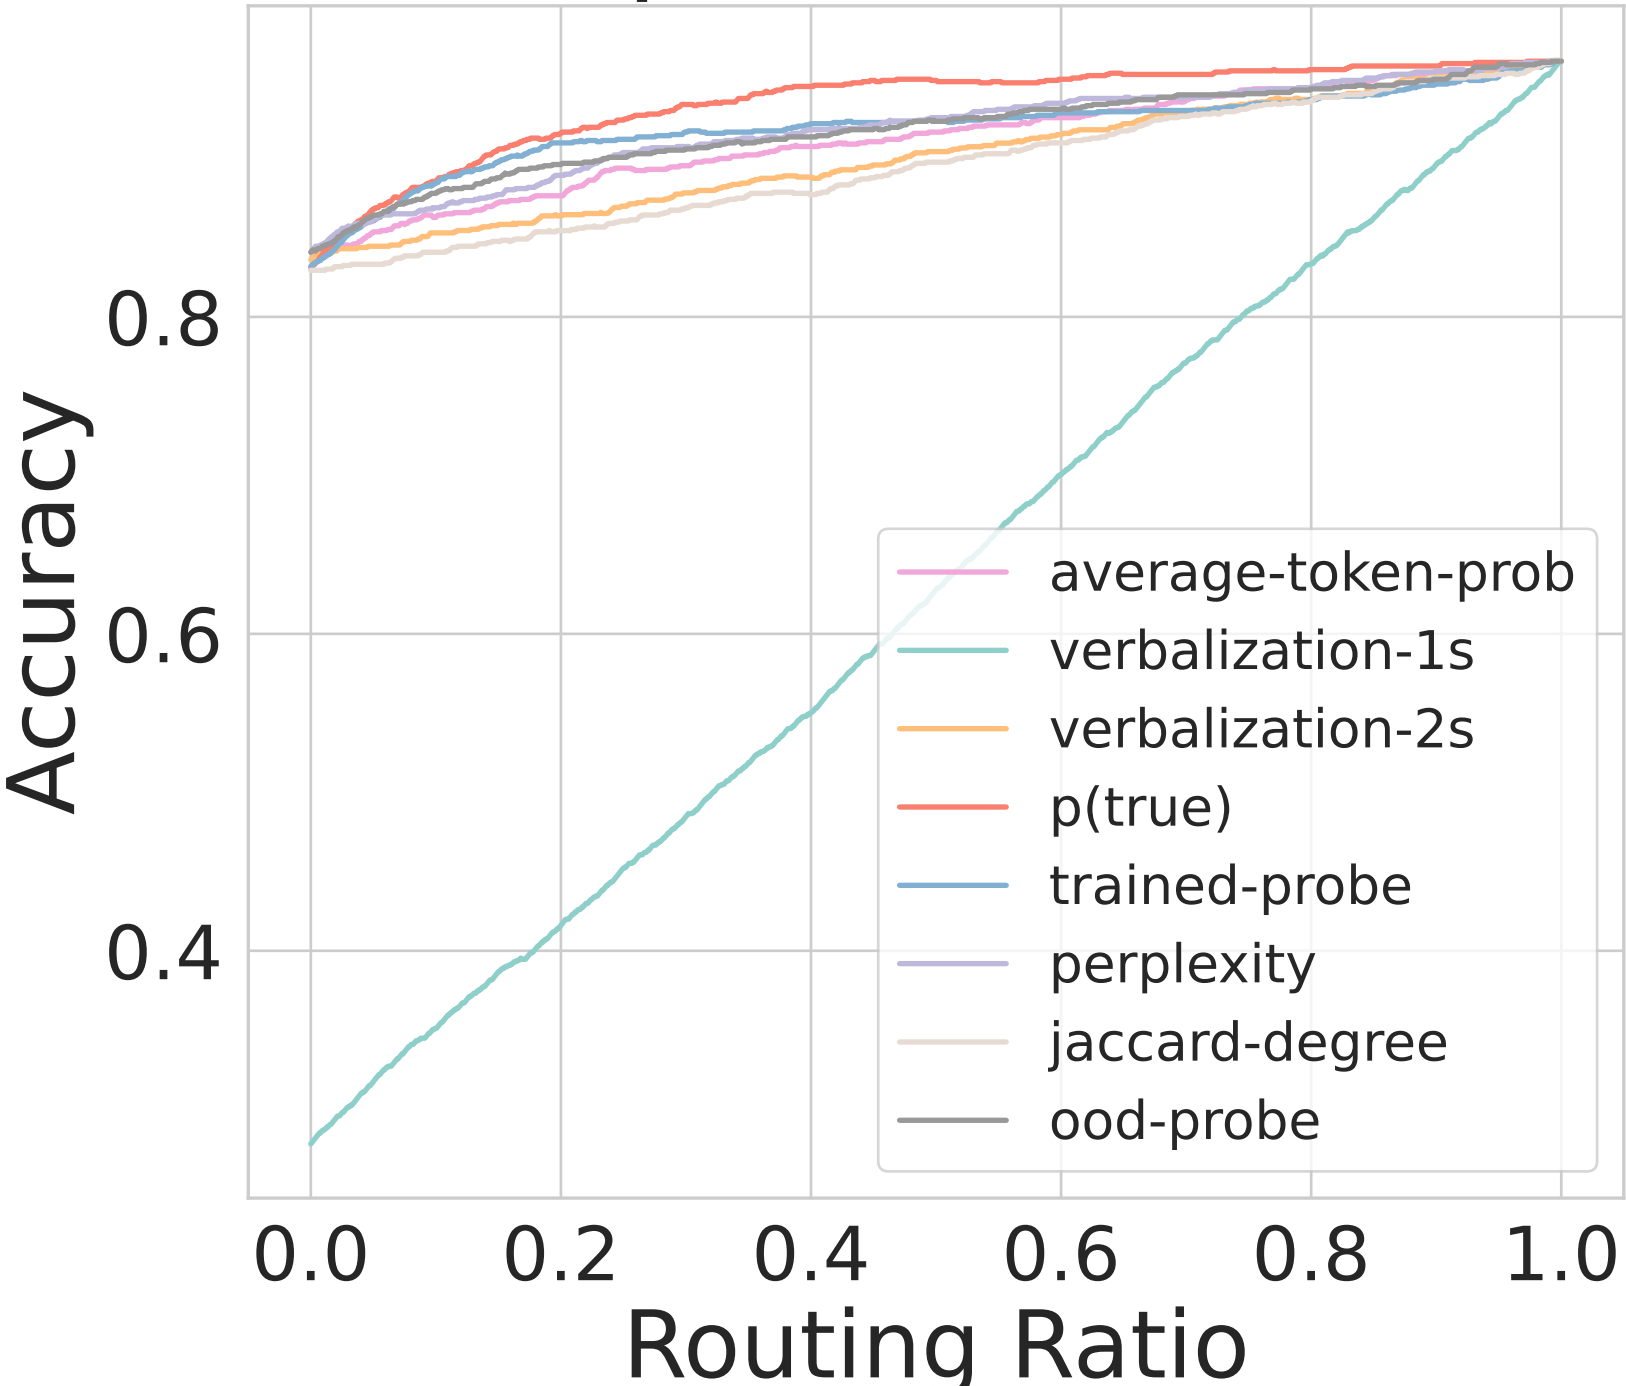

Supplement: supplementary_material [file rr_acc_gsm8k_phi-3.5-mini_qwen32.pdf › Routing_SLM_LLMs/Uncertainty-based Routing/w_legend/to_qwen32/rr_acc_gsm8k_phi-3.5-mini_qwen32.pdf]

# GSM8K, qwen-2.5-7b to Qwen3-32B

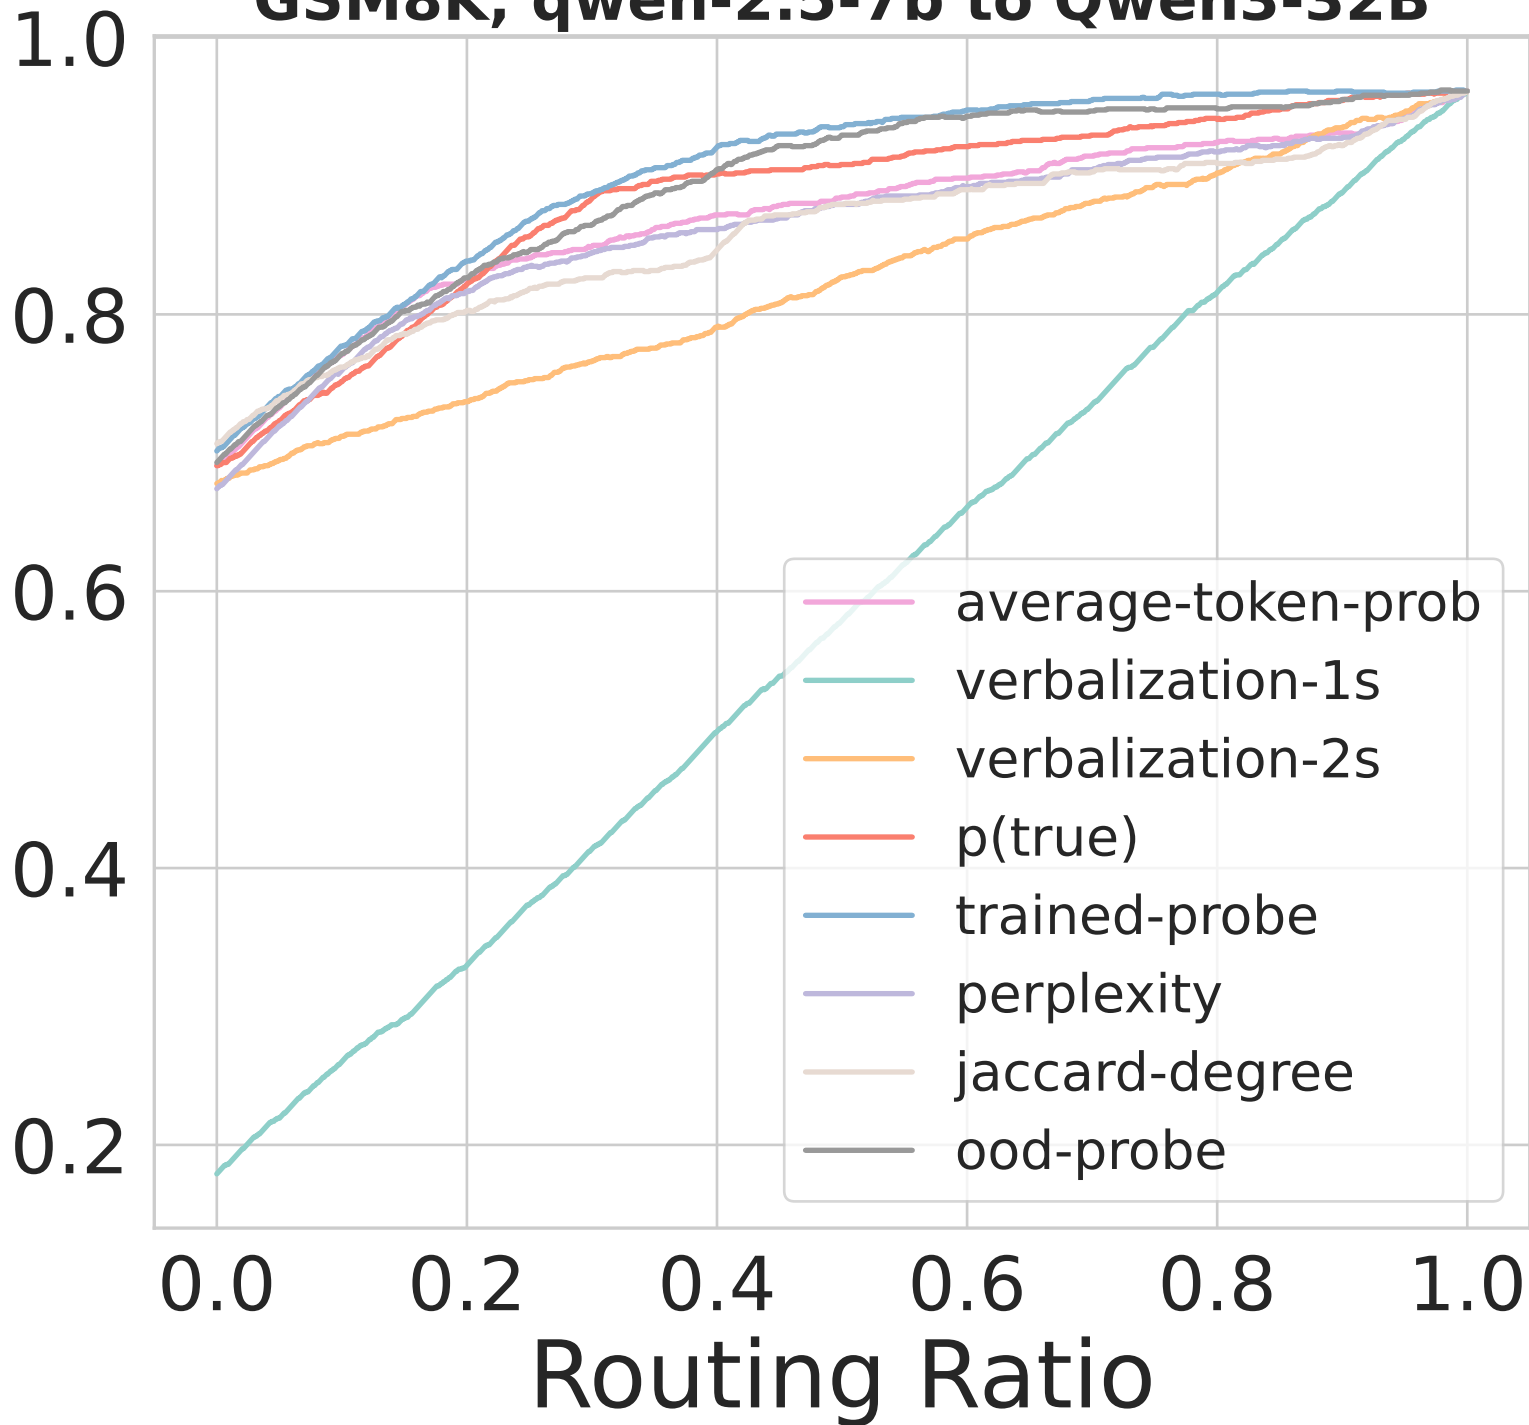

Supplement: supplementary_material [file rr_acc_gsm8k_qwen-2.5-7b_qwen32.pdf › Routing_SLM_LLMs/Uncertainty-based Routing/w_legend/to_qwen32/rr_acc_gsm8k_qwen-2.5-7b_qwen32.pdf]

# GSM8K, rwkv to Qwen3-32B

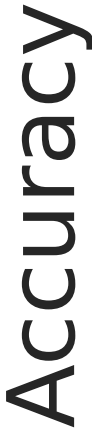

ood-probe

Supplement: supplementary_material [file rr_acc_gsm8k_rwkv_qwen32.pdf › Routing_SLM_LLMs/Uncertainty-based Routing/w_legend/to_qwen32/rr_acc_gsm8k_rwkv_qwen32.pdf]

HellaSwag, Qwen3-1.7B to Qwen3-32B

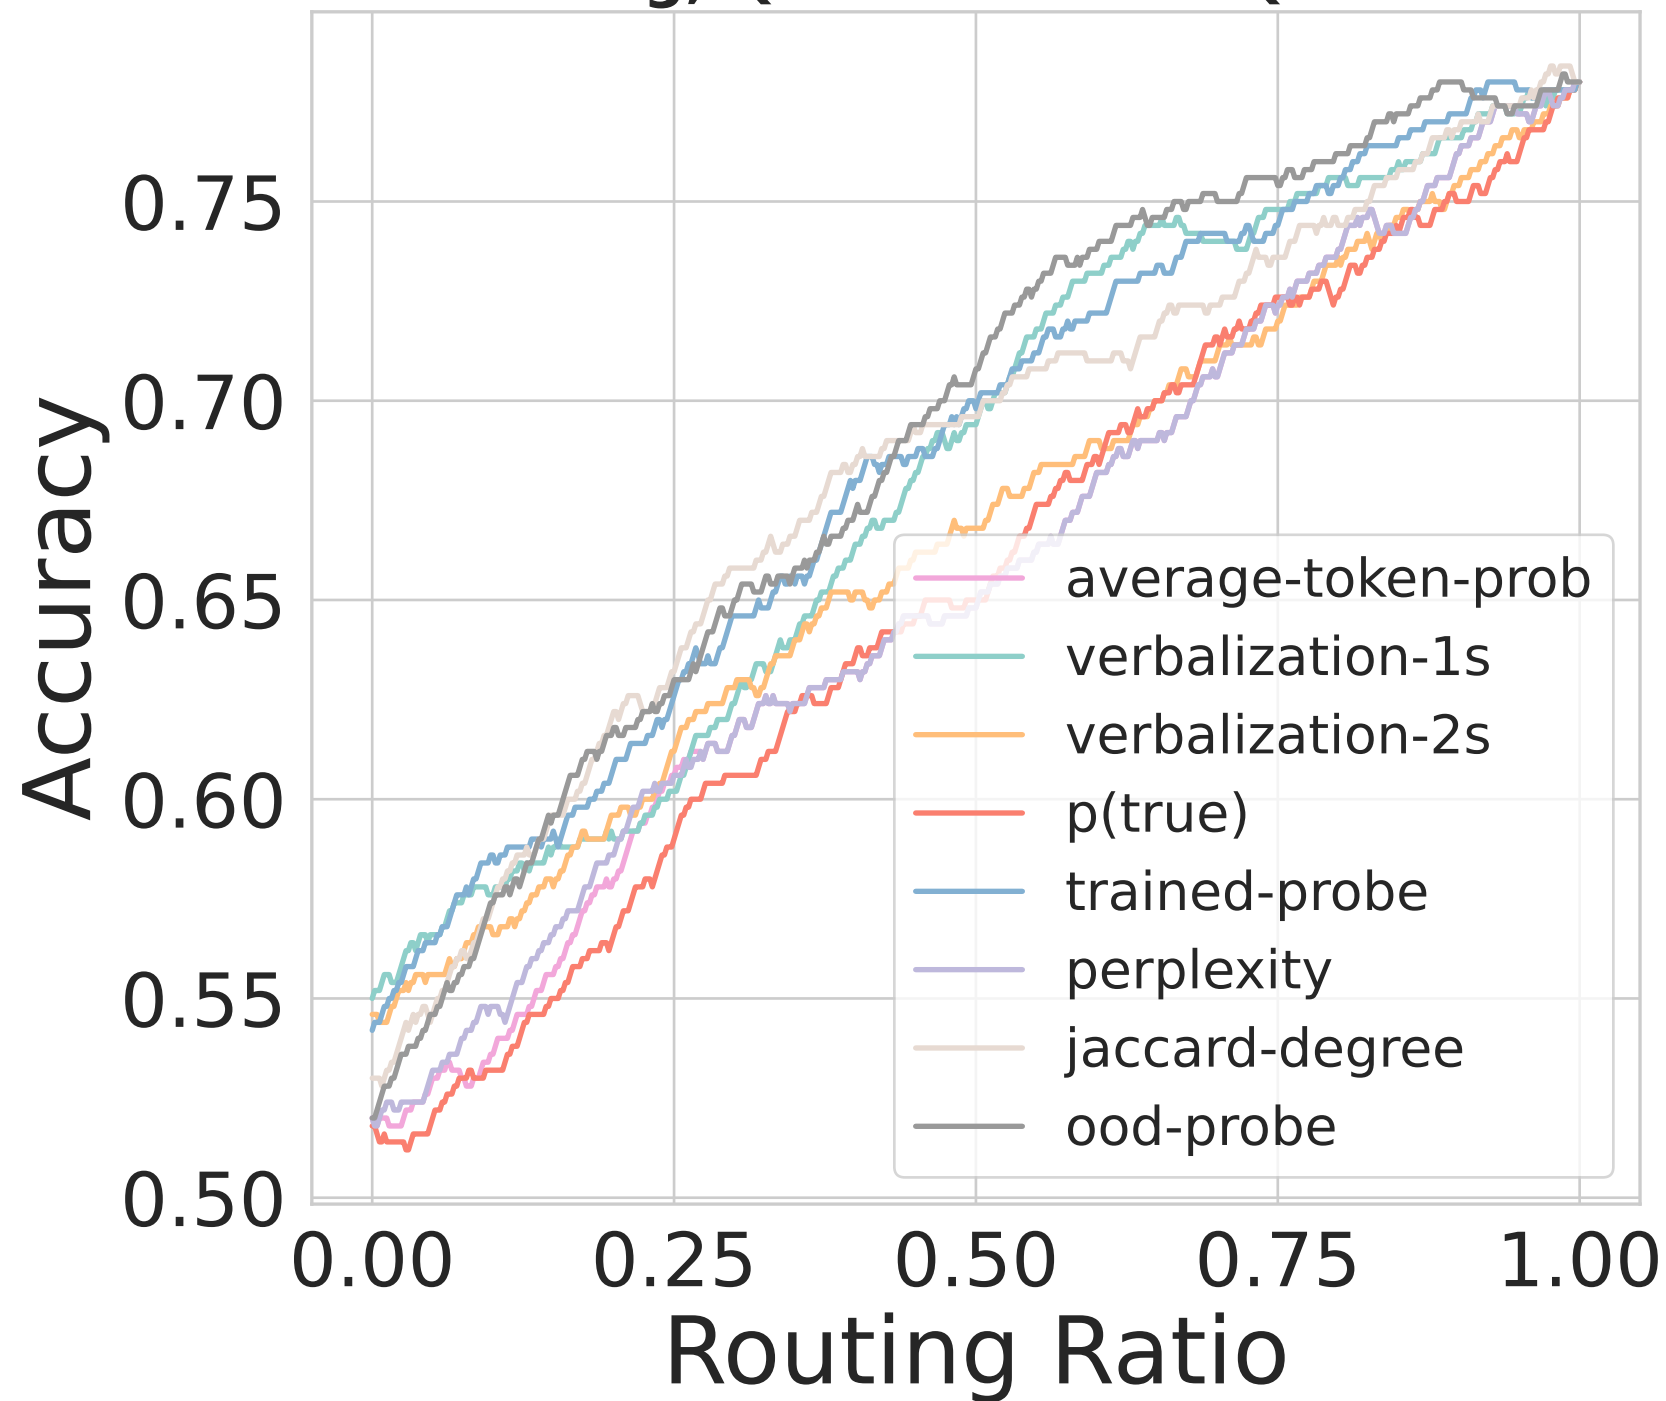

Supplement: supplementary_material [file rr_acc_hellaswag_Qwen3-1.7B_qwen32.pdf › Routing_SLM_LLMs/Uncertainty-based Routing/w_legend/to_qwen32/rr_acc_hellaswag_Qwen3-1.7B_qwen32.pdf]

**HellaSwag, Qwen3-4B to Qwen3-32B**

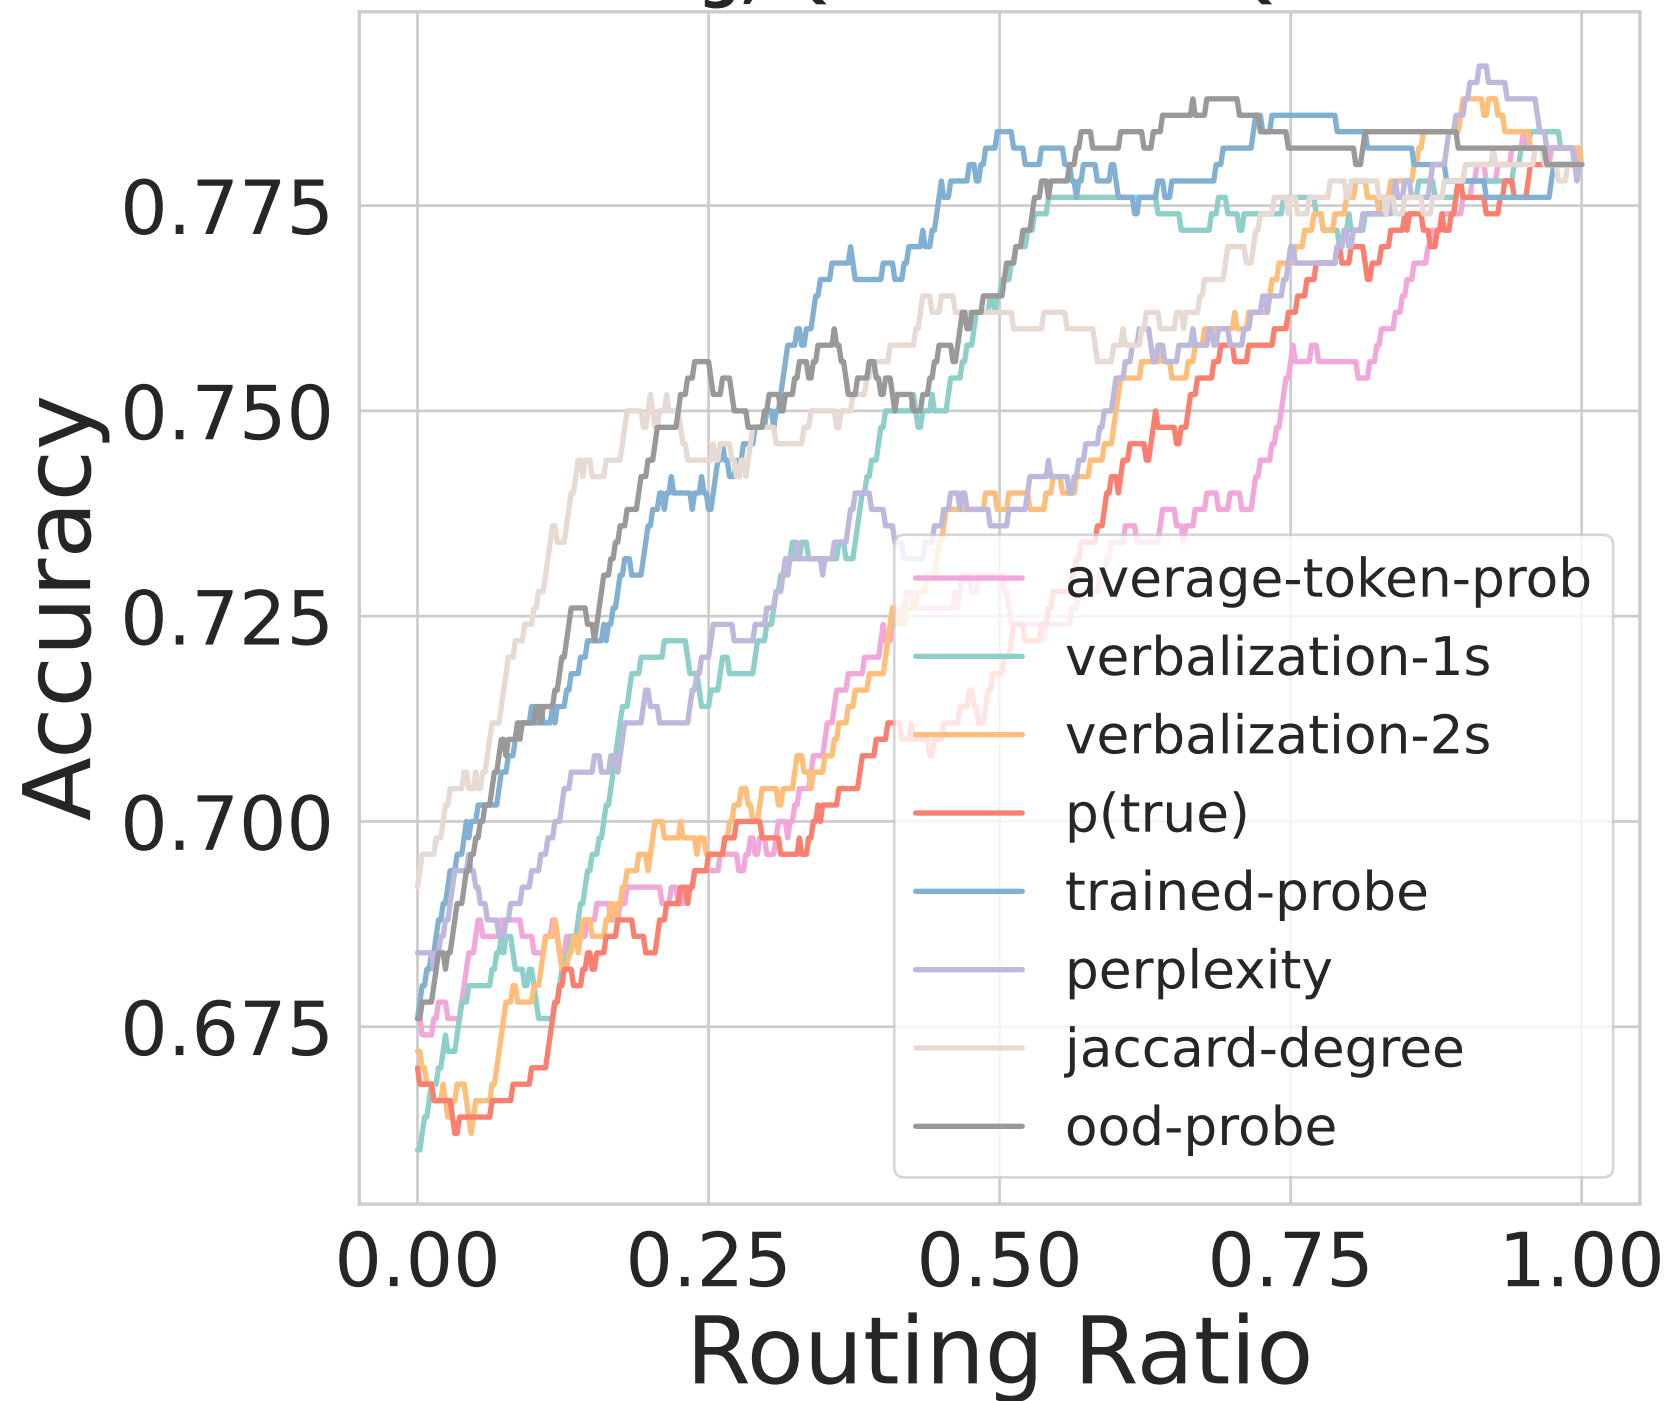

Supplement: supplementary_material [file rr_acc_hellaswag_Qwen3-4B_qwen32.pdf › Routing_SLM_LLMs/Uncertainty-based Routing/w_legend/to_qwen32/rr_acc_hellaswag_Qwen3-4B_qwen32.pdf]

# HellaSwag, granite-3.1-8b to Qwen3-32B

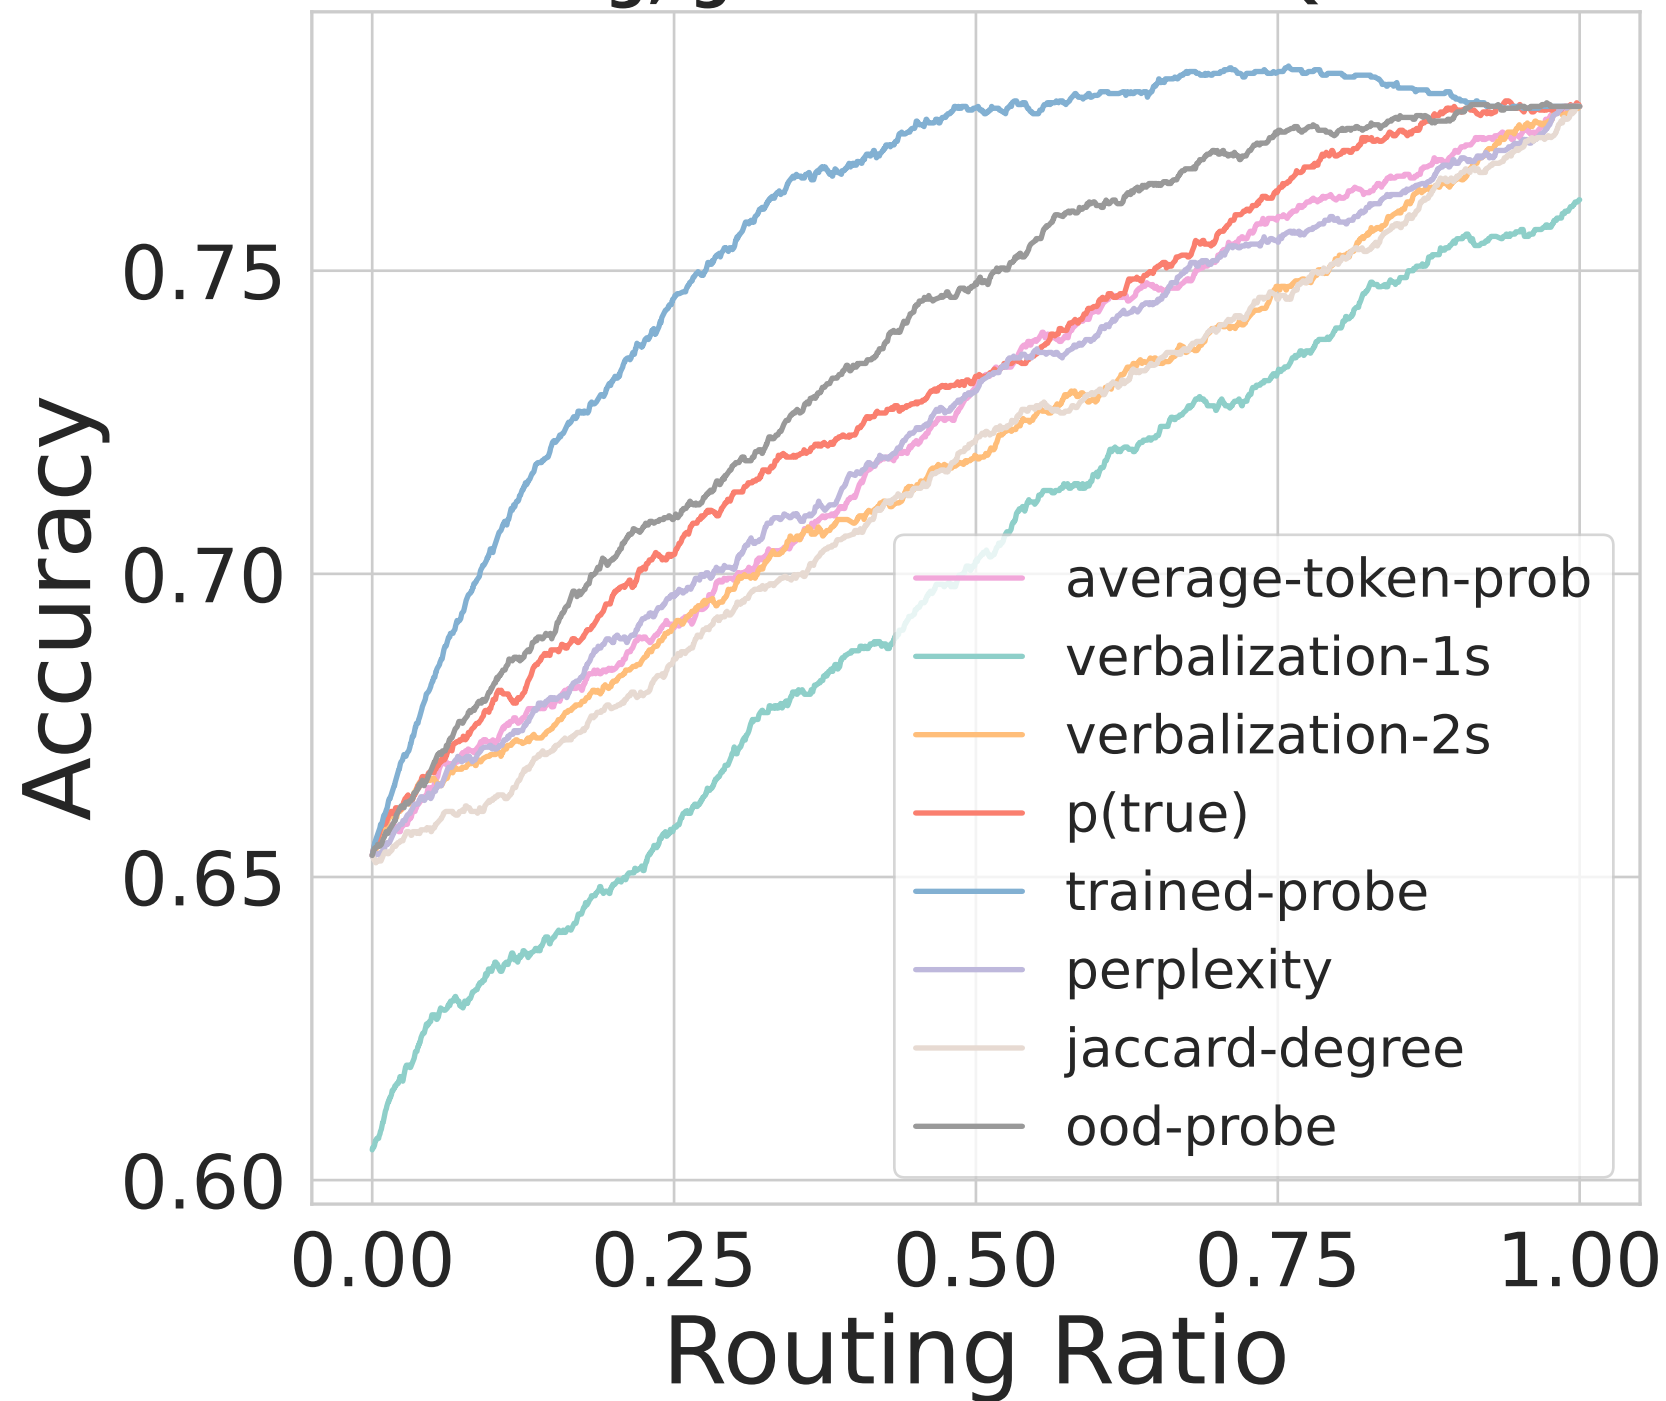

Supplement: supplementary_material [file rr_acc_hellaswag_granite-3.1-8b_qwen32.pdf › Routing_SLM_LLMs/Uncertainty-based Routing/w_legend/to_qwen32/rr_acc_hellaswag_granite-3.1-8b_qwen32.pdf]

**HellaSwag, llama-3.1-8b to Qwen3-32B**

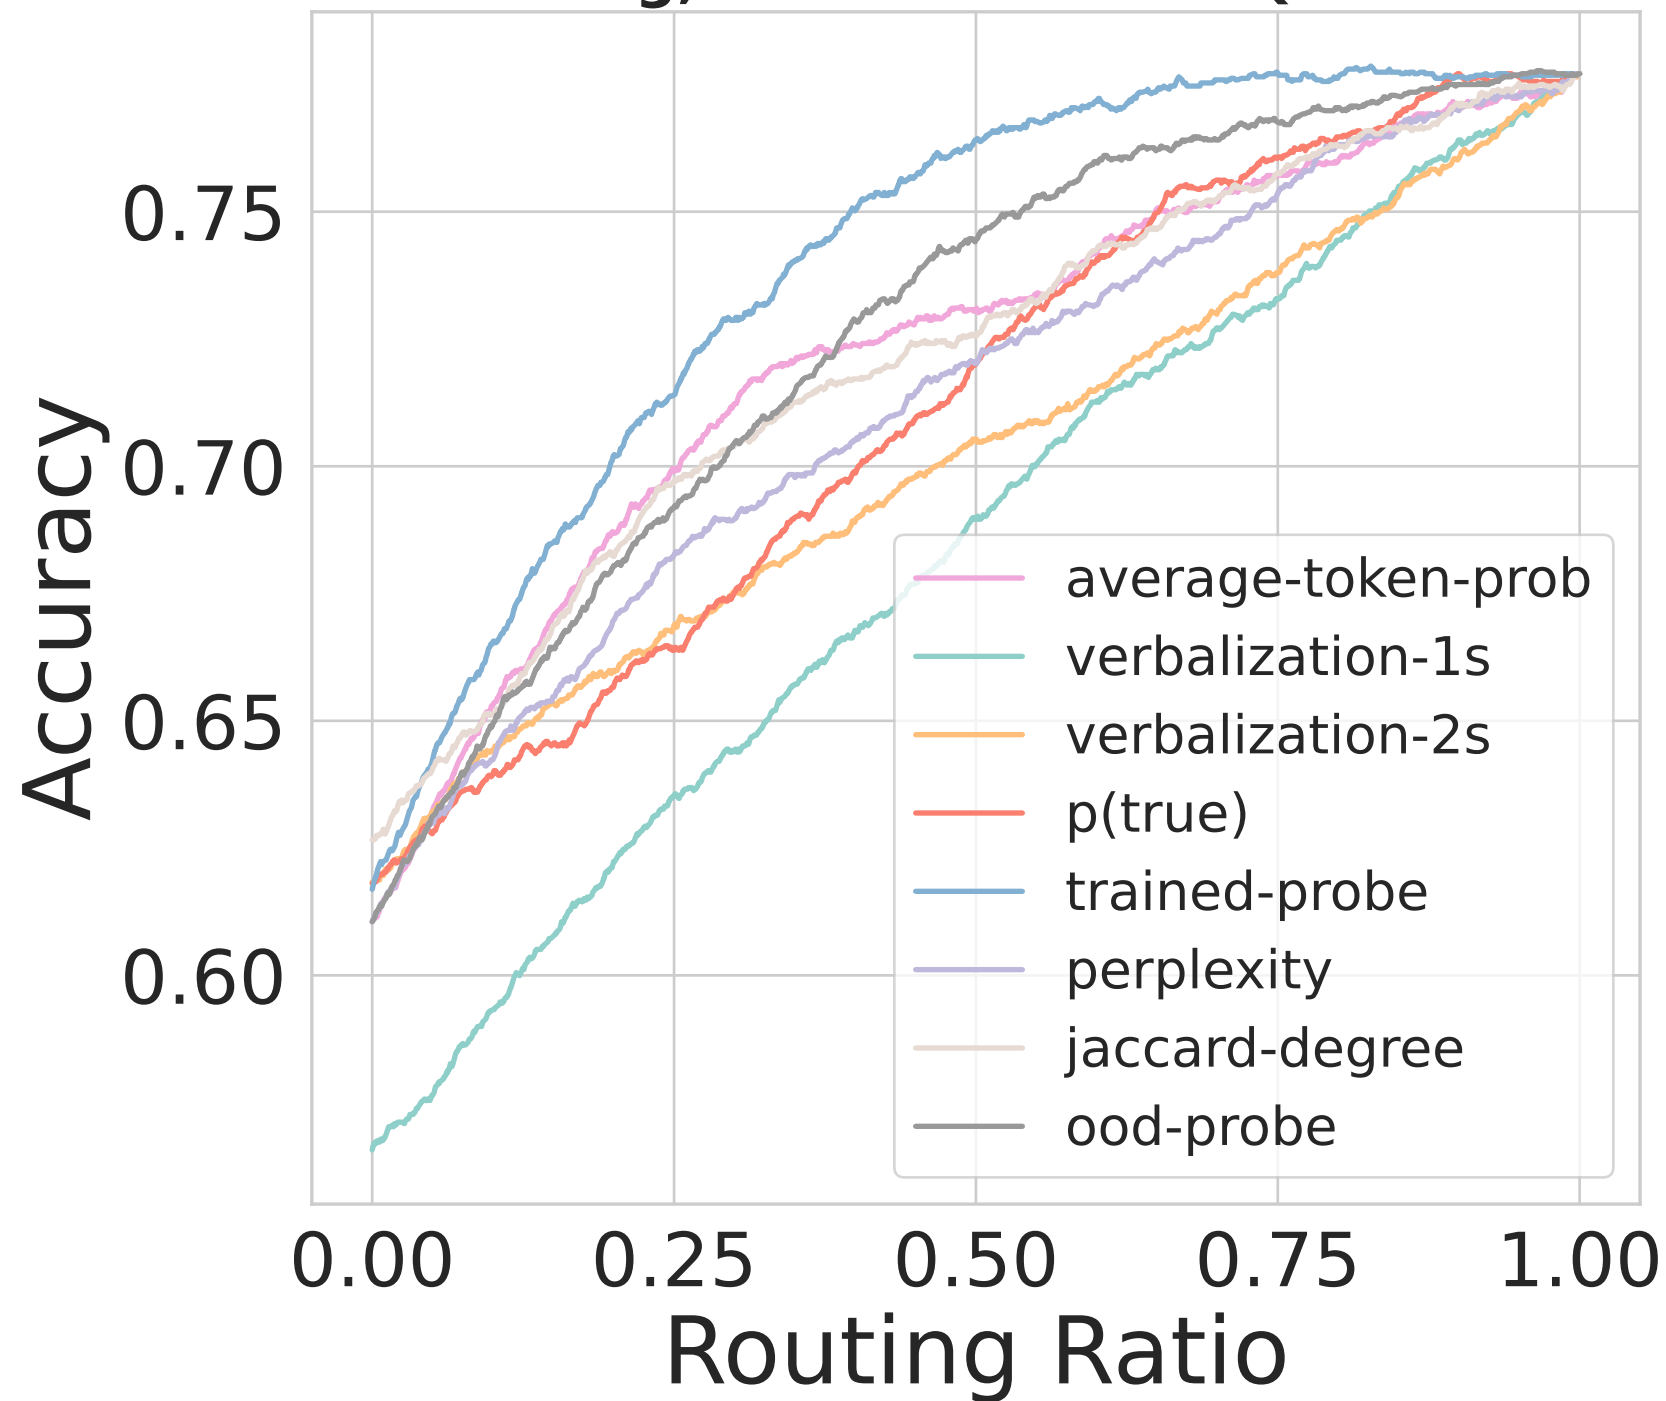

Supplement: supplementary_material [file rr_acc_hellaswag_llama-3.1-8b_qwen32.pdf › Routing_SLM_LLMs/Uncertainty-based Routing/w_legend/to_qwen32/rr_acc_hellaswag_llama-3.1-8b_qwen32.pdf]

# HellaSwag, llama-3.2-3b to Qwen3-32B

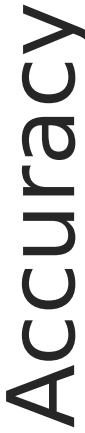

Supplement: supplementary_material [file rr_acc_hellaswag_llama-3.2-3b_qwen32.pdf › Routing_SLM_LLMs/Uncertainty-based Routing/w_legend/to_qwen32/rr_acc_hellaswag_llama-3.2-3b_qwen32.pdf]

**HellaSwag, mistral-7b to Qwen3-32B**

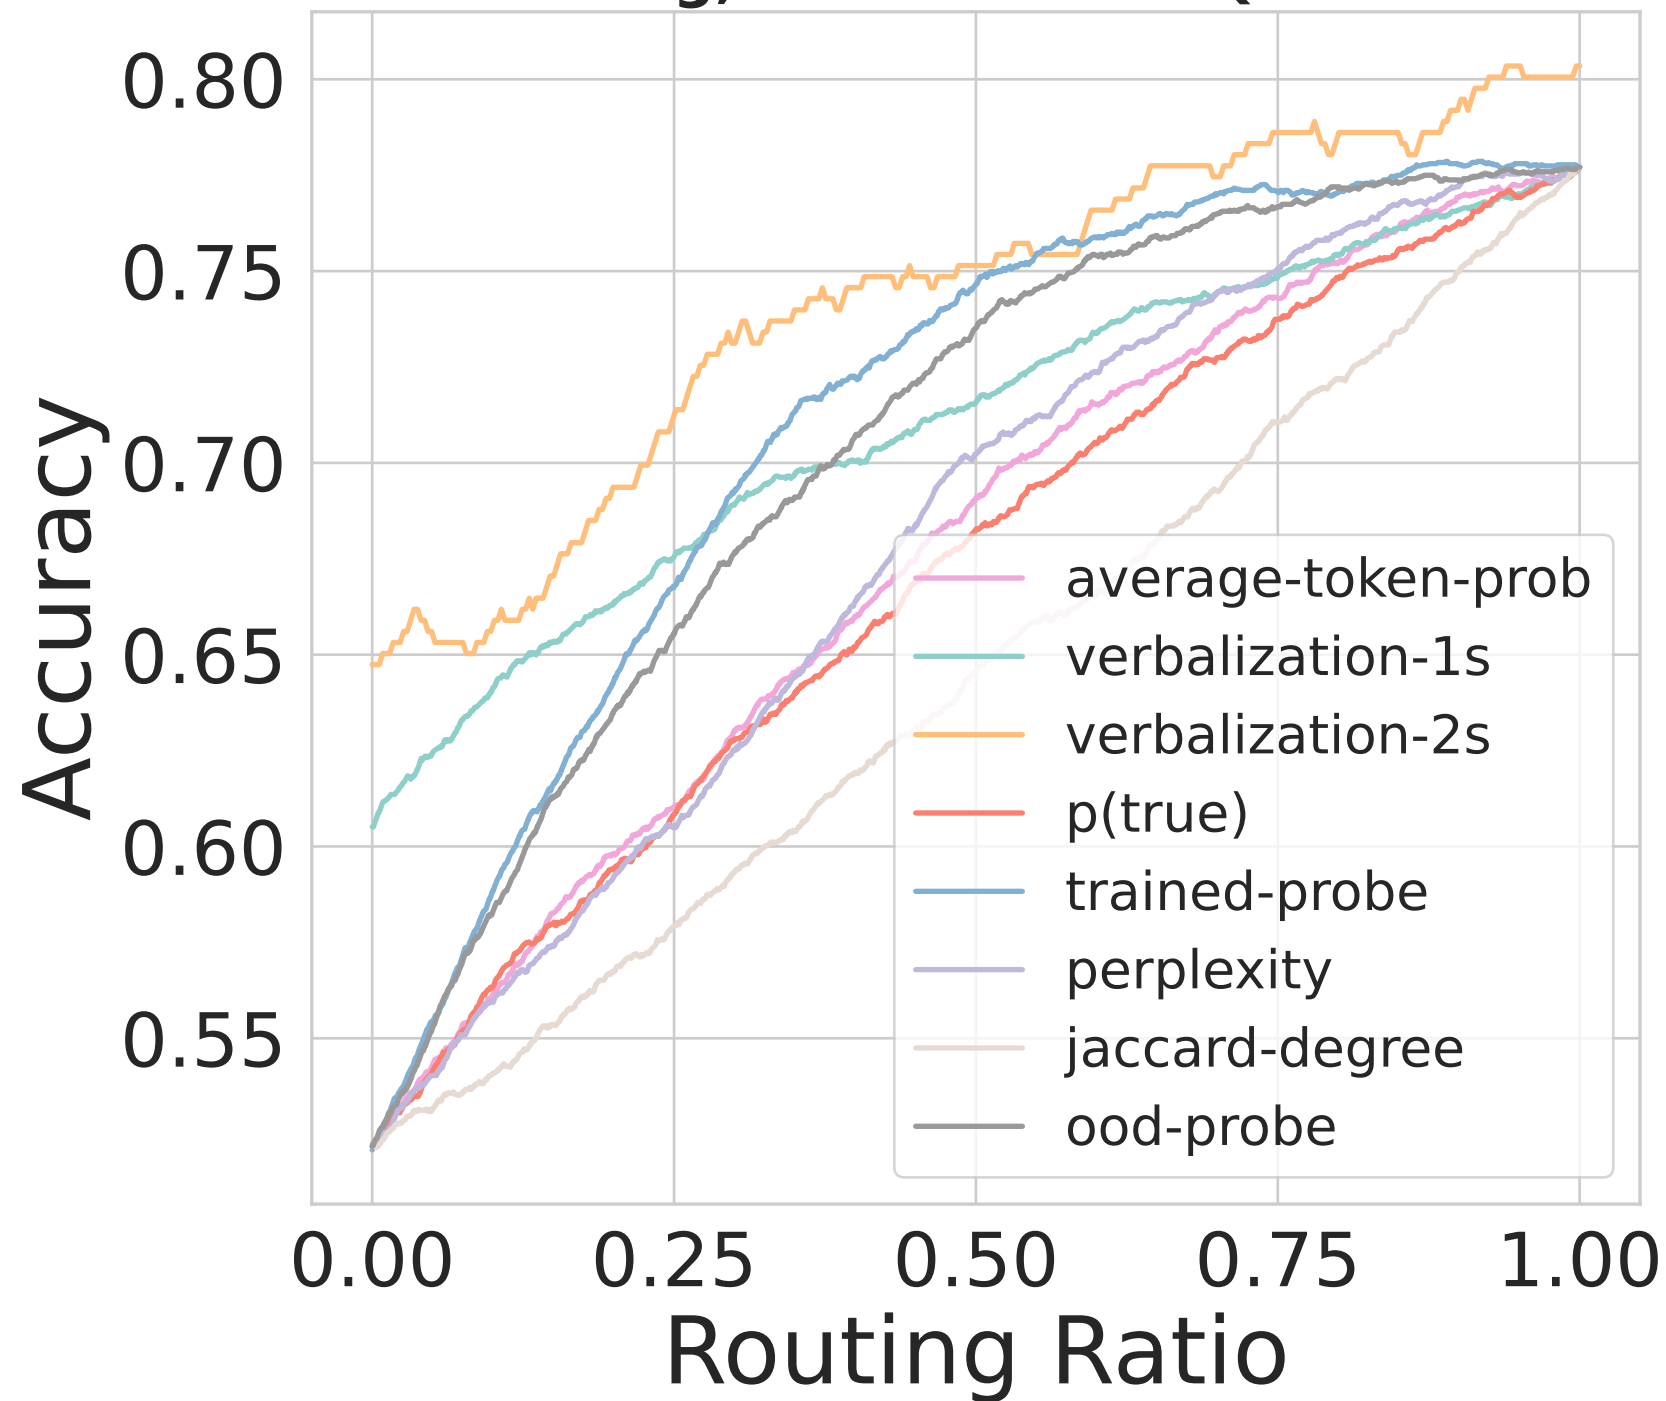

Supplement: supplementary_material [file rr_acc_hellaswag_mistral-7b_qwen32.pdf › Routing_SLM_LLMs/Uncertainty-based Routing/w_legend/to_qwen32/rr_acc_hellaswag_mistral-7b_qwen32.pdf]

**HellaSwag, phi-3.5-mini to Qwen3-32B**

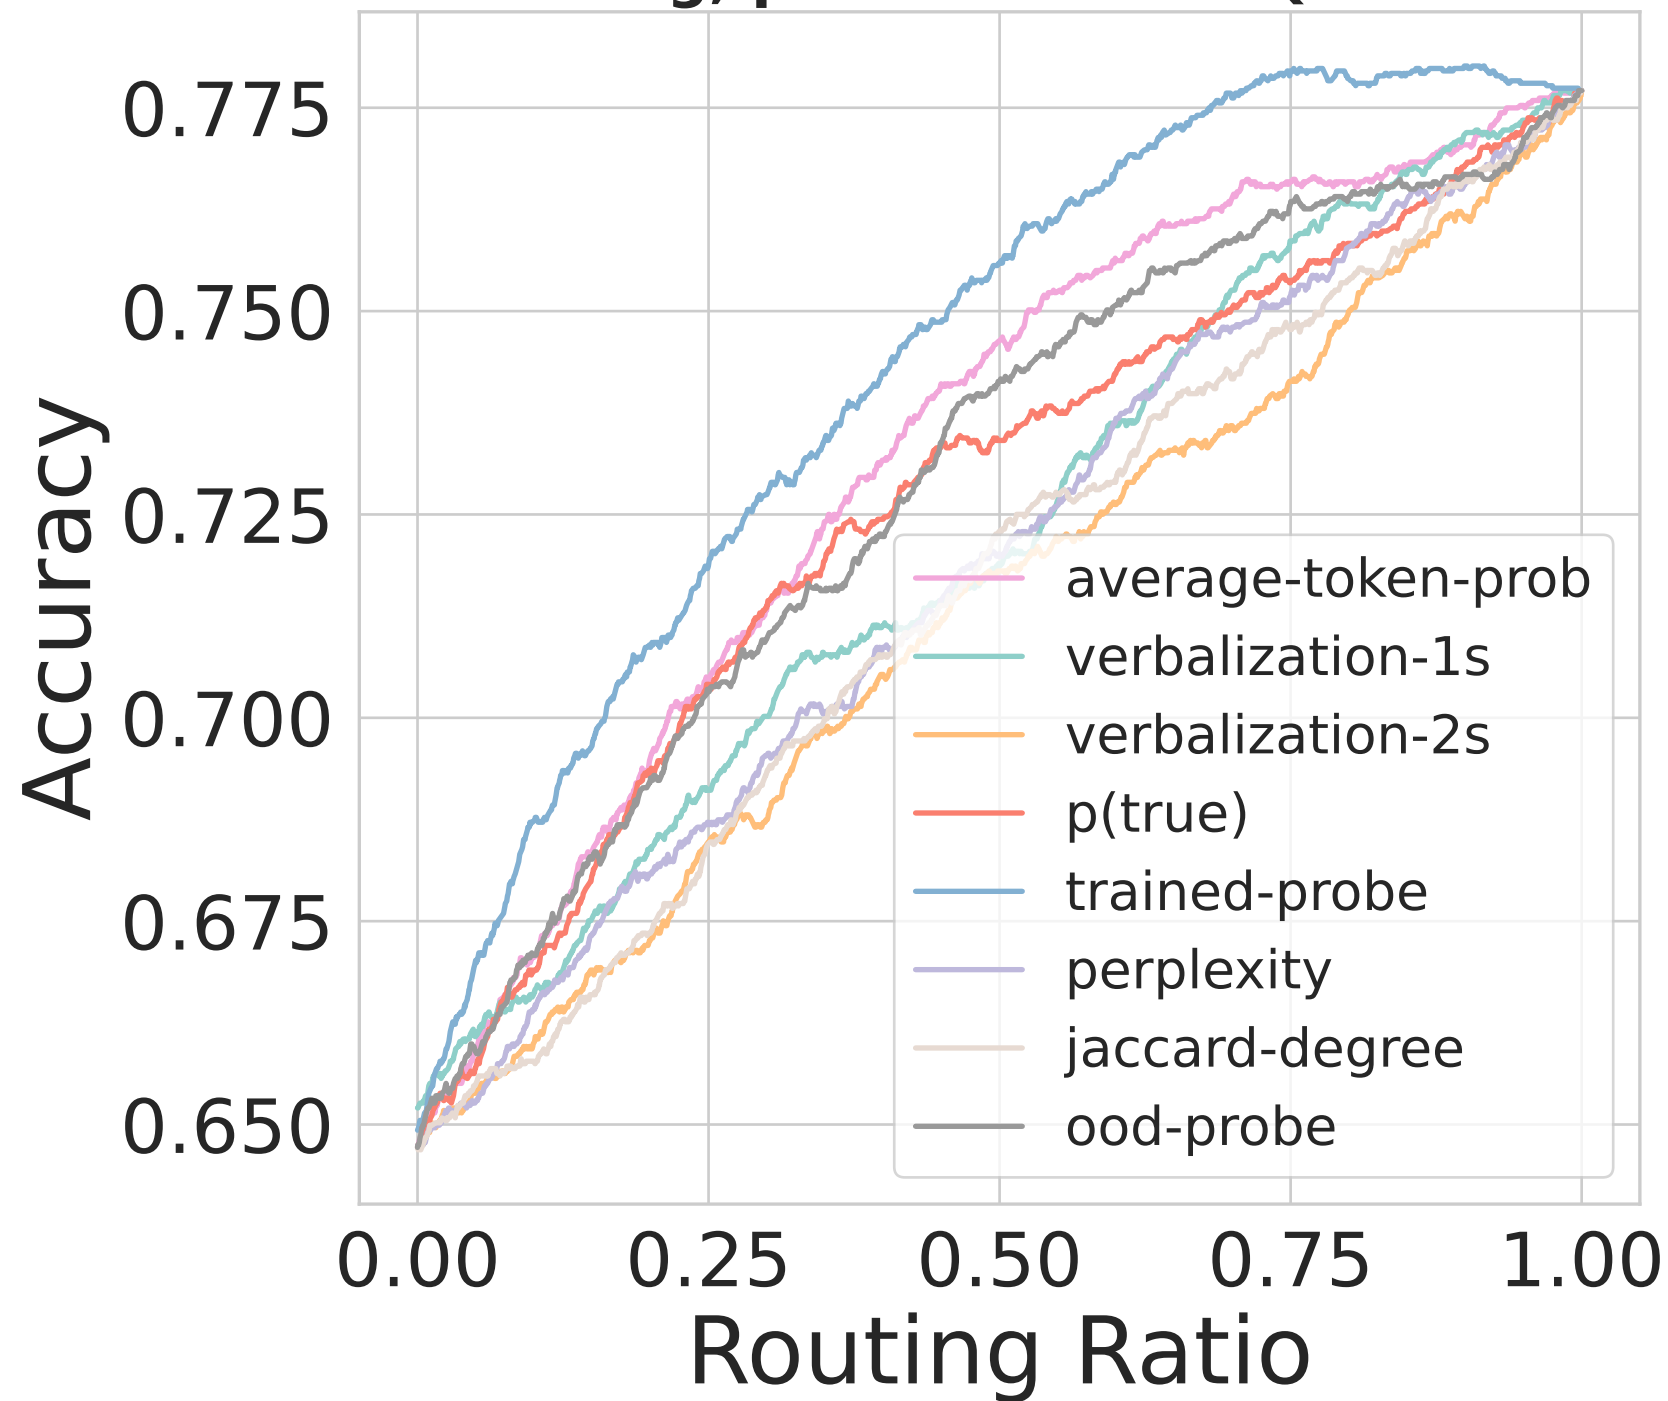

Supplement: supplementary_material [file rr_acc_hellaswag_phi-3.5-mini_qwen32.pdf › Routing_SLM_LLMs/Uncertainty-based Routing/w_legend/to_qwen32/rr_acc_hellaswag_phi-3.5-mini_qwen32.pdf]

# HellaSwag, phi-4-mini-reasoning to Qwen3-32B

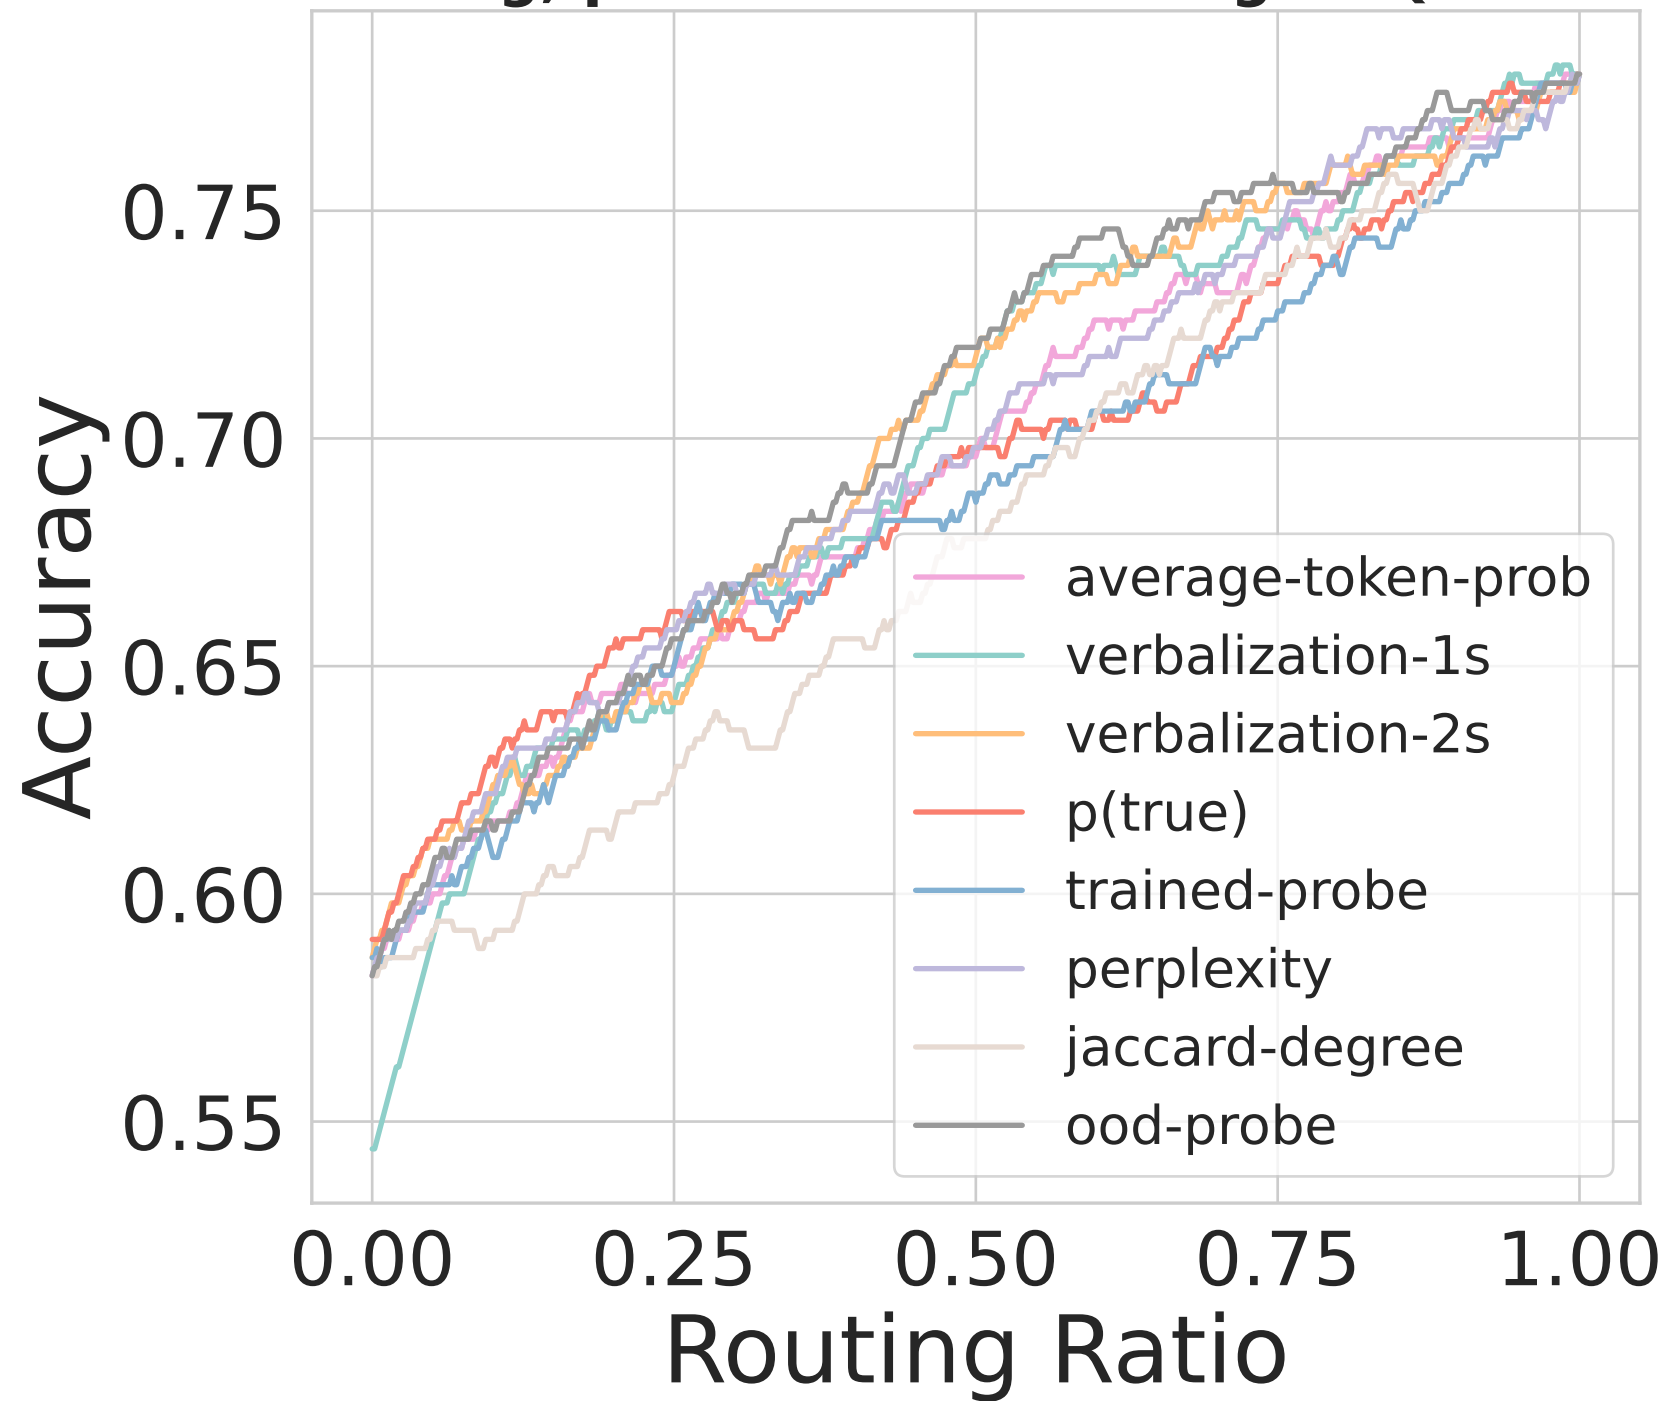

Supplement: supplementary_material [file rr_acc_hellaswag_phi-4-mini-reasoning_qwen32.pdf › Routing_SLM_LLMs/Uncertainty-based Routing/w_legend/to_qwen32/rr_acc_hellaswag_phi-4-mini-reasoning_qwen32.pdf]

# HellaSwag, qwen-2.5-7b to Qwen3-32B

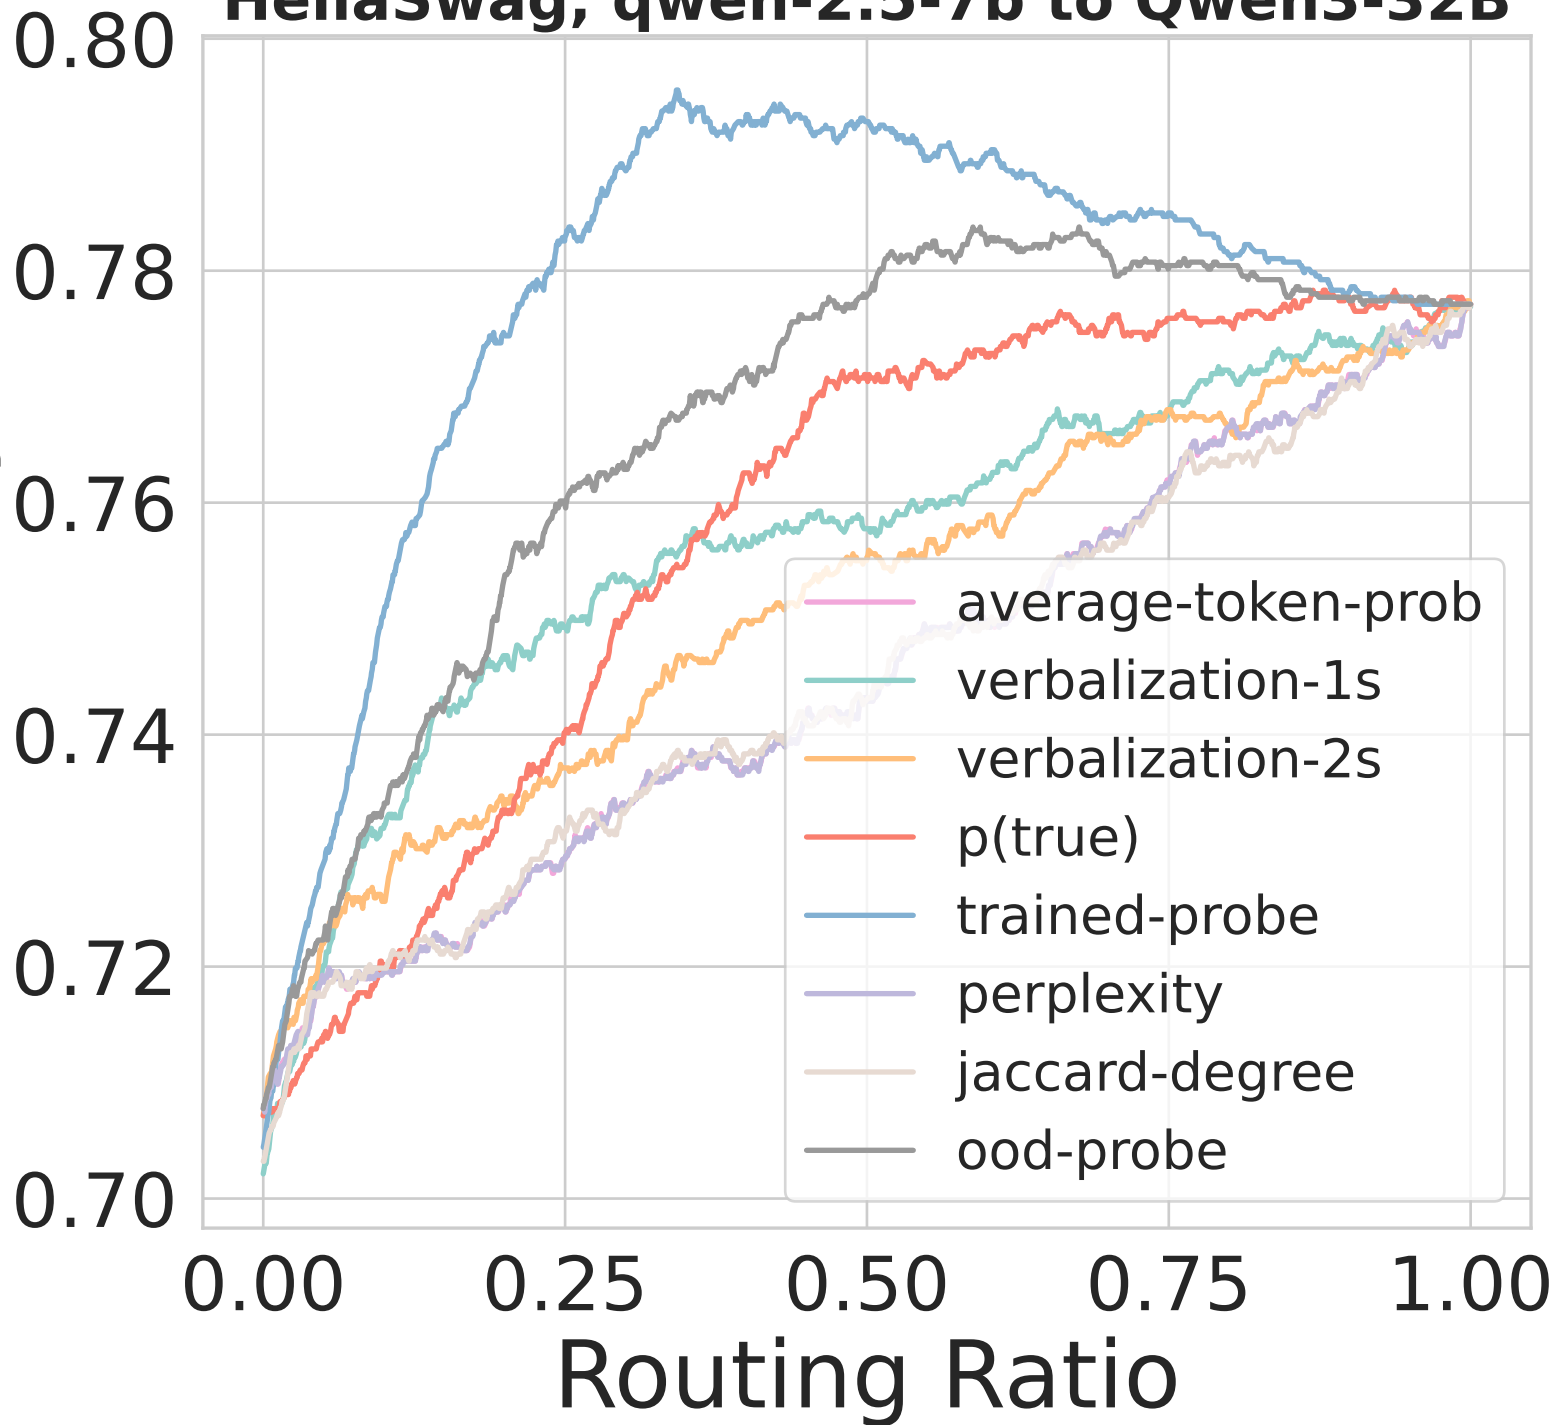

Supplement: supplementary_material [file rr_acc_hellaswag_qwen-2.5-7b_qwen32.pdf › Routing_SLM_LLMs/Uncertainty-based Routing/w_legend/to_qwen32/rr_acc_hellaswag_qwen-2.5-7b_qwen32.pdf]

# HellaSwag, rwkv to Qwen3-32B

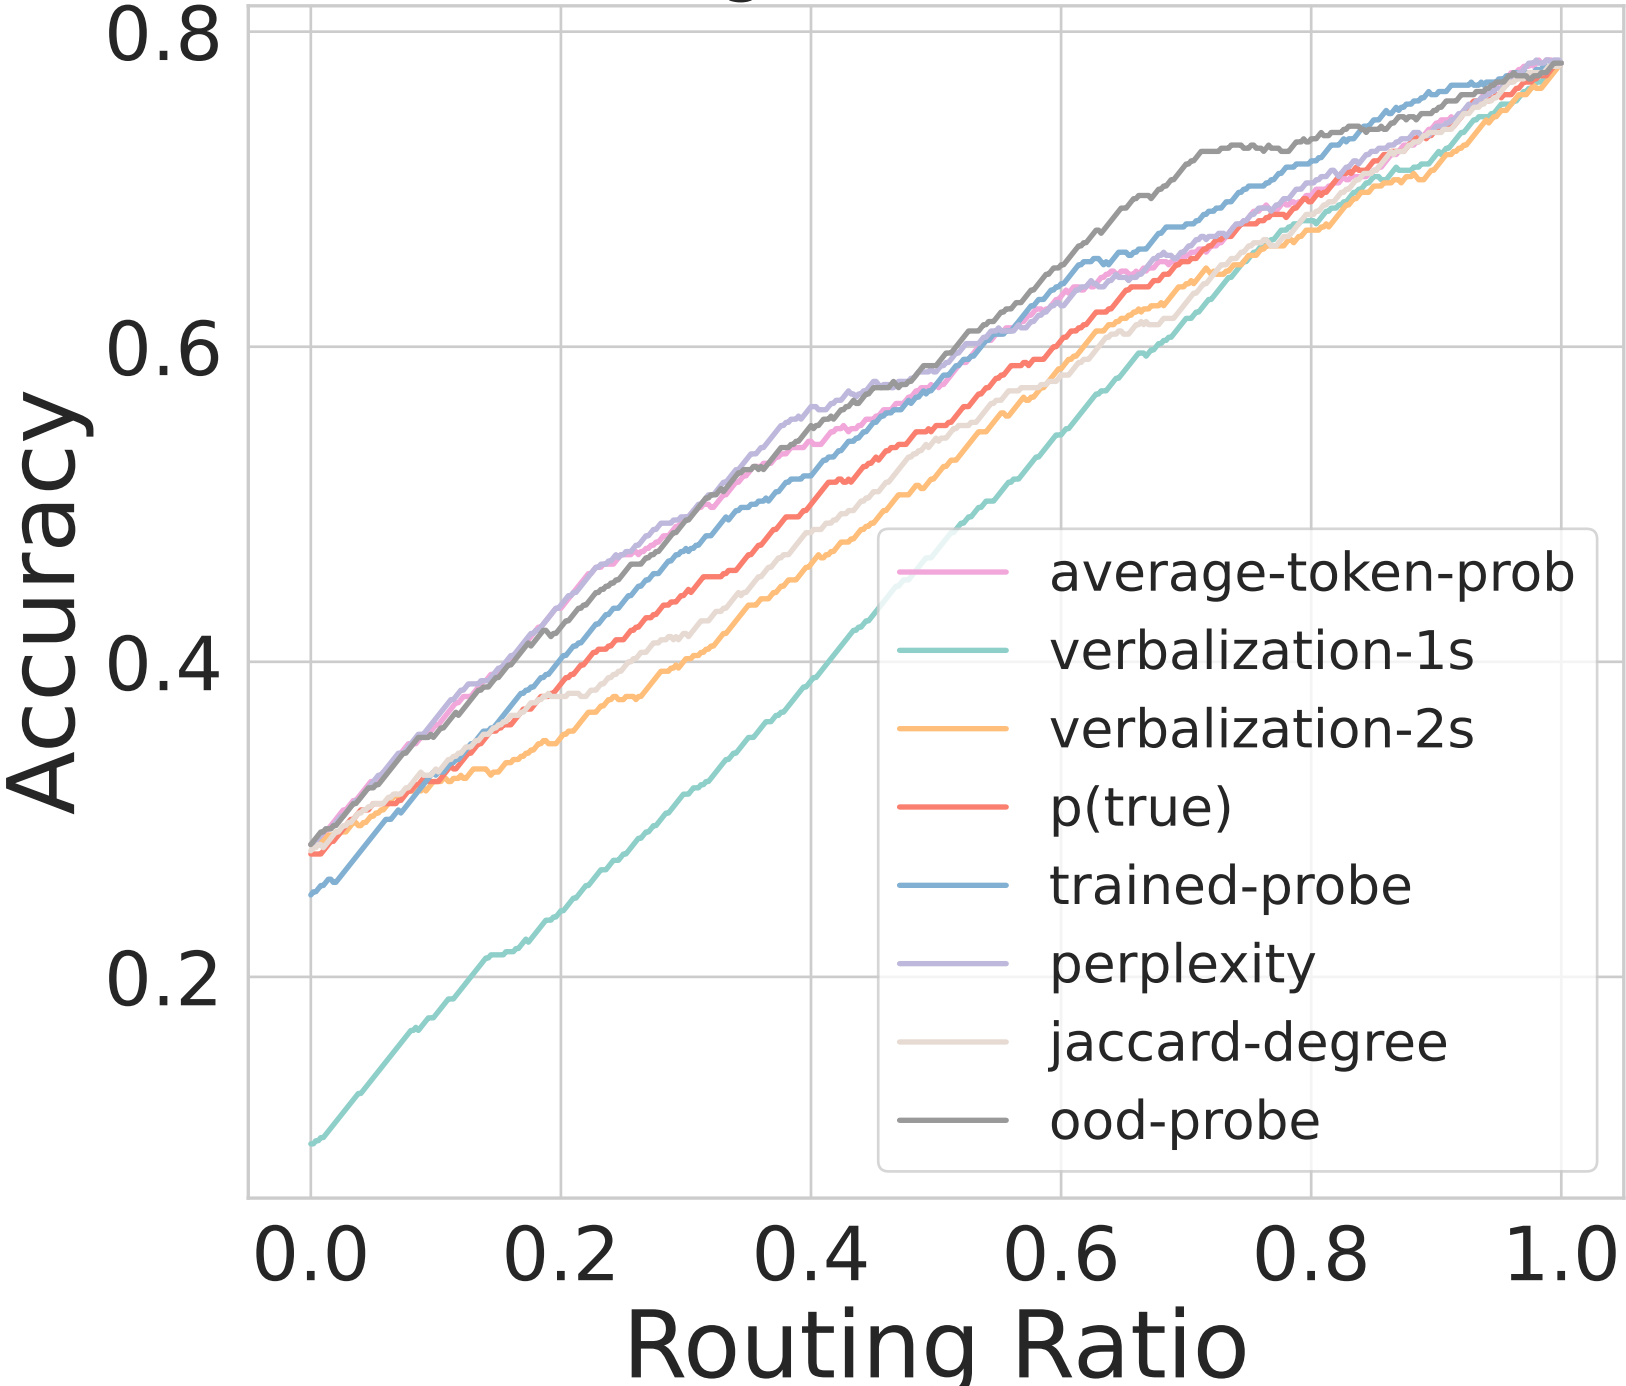

Supplement: supplementary_material [file rr_acc_hellaswag_rwkv_qwen32.pdf › Routing_SLM_LLMs/Uncertainty-based Routing/w_legend/to_qwen32/rr_acc_hellaswag_rwkv_qwen32.pdf]

# MATH-500, Qwen3-0.6B to Qwen3-32B

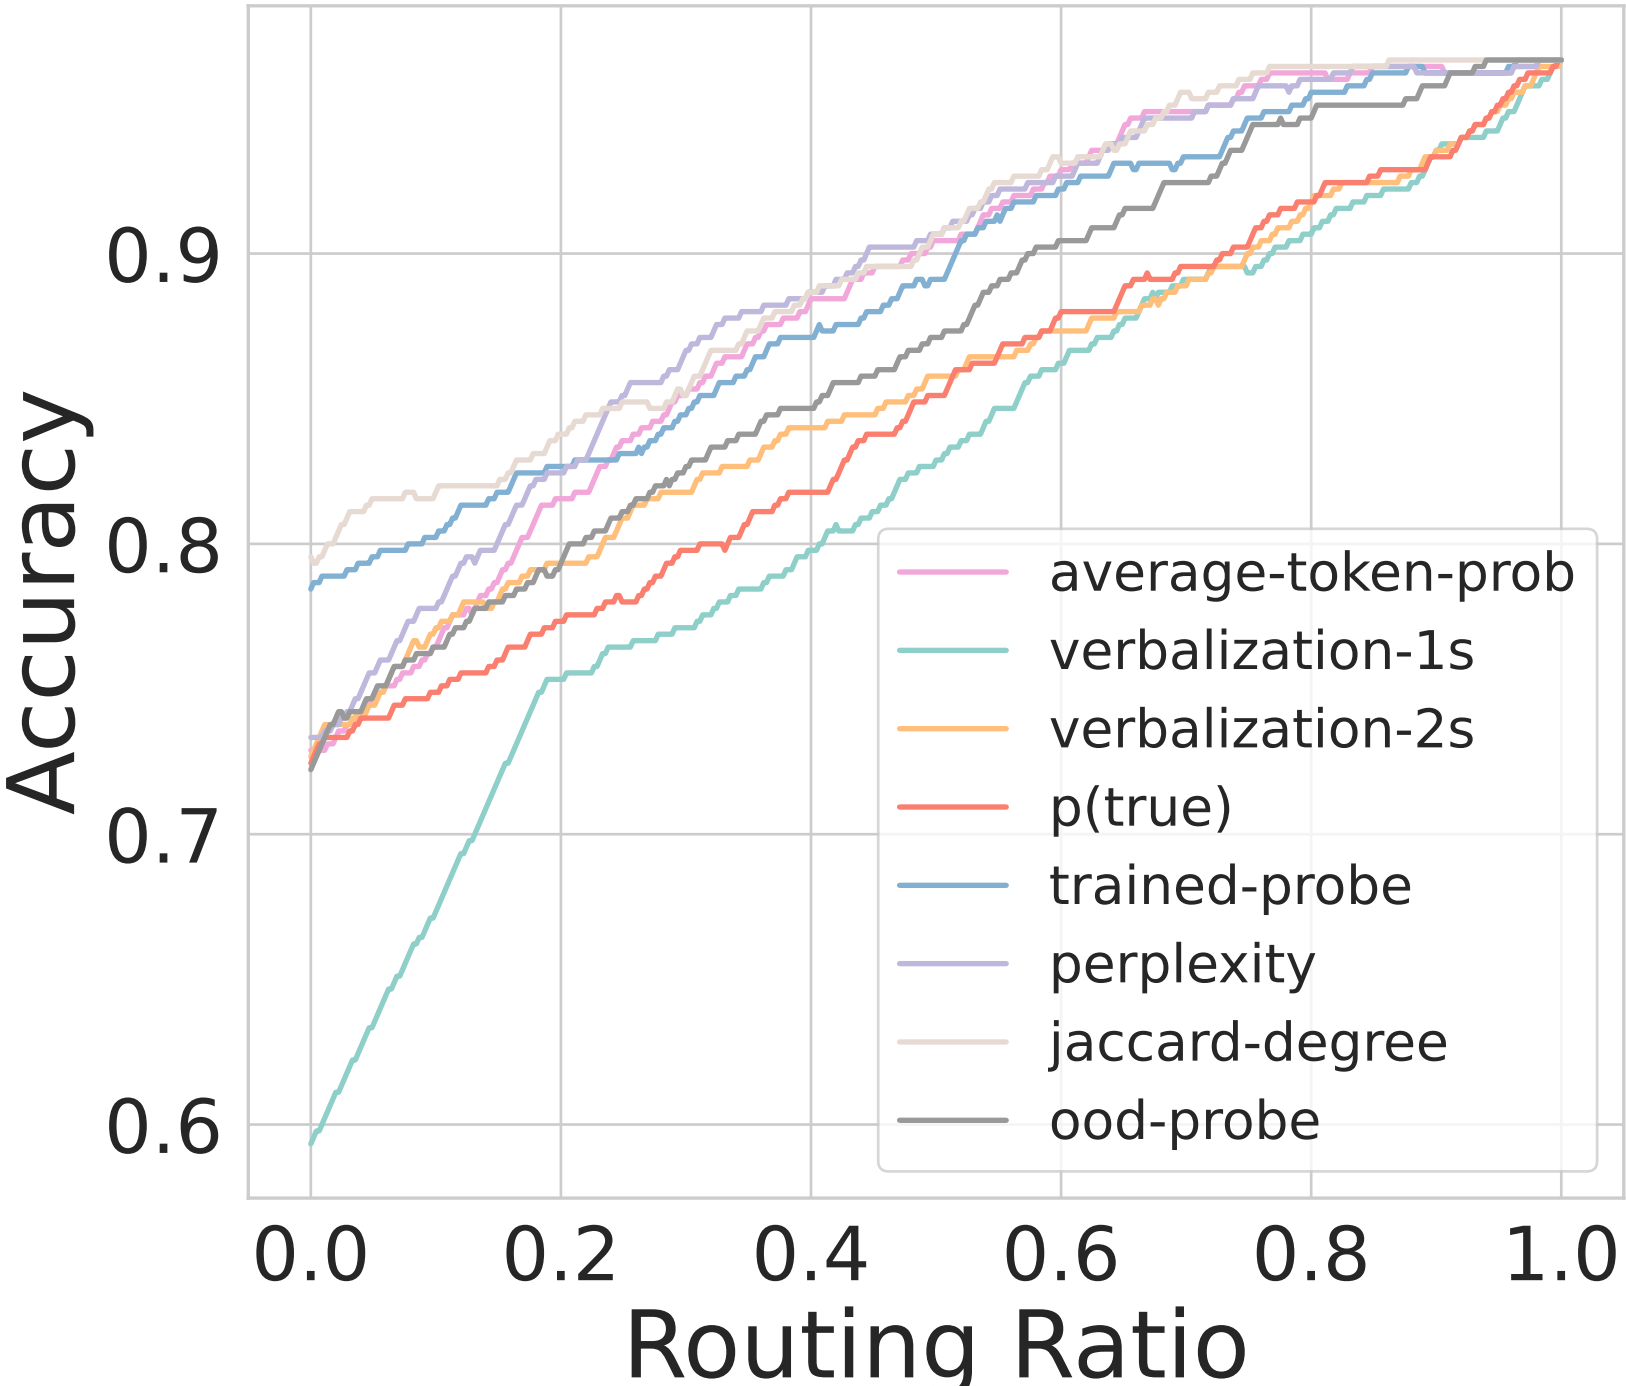

Supplement: supplementary_material [file rr_acc_math_500_Qwen3-0.6B_qwen32.pdf › Routing_SLM_LLMs/Uncertainty-based Routing/w_legend/to_qwen32/rr_acc_math_500_Qwen3-0.6B_qwen32.pdf]

# MATH-500, Qwen3-1.7B to Qwen3-32B

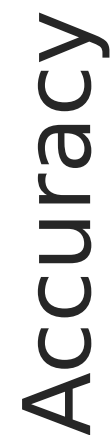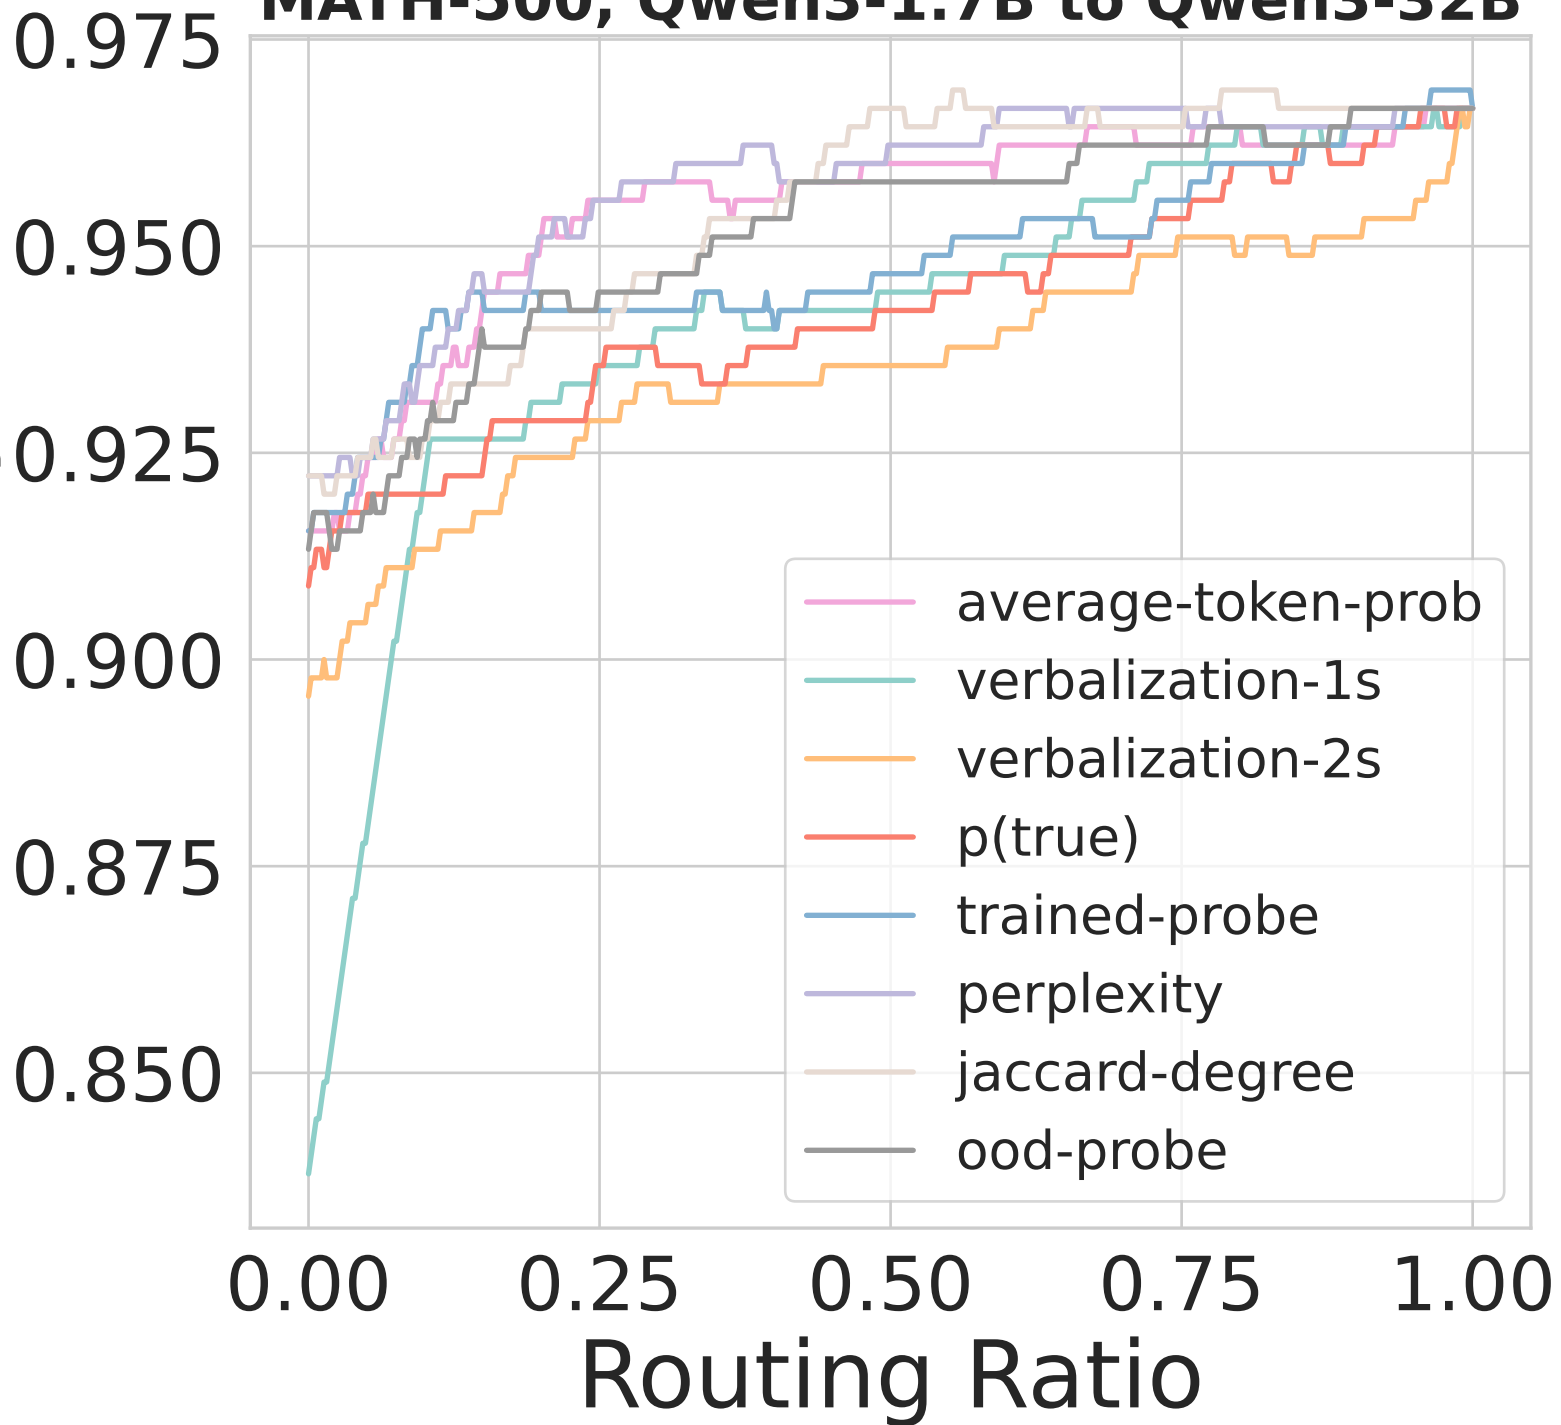

Supplement: supplementary_material [file rr_acc_math_500_Qwen3-1.7B_qwen32.pdf › Routing_SLM_LLMs/Uncertainty-based Routing/w_legend/to_qwen32/rr_acc_math_500_Qwen3-1.7B_qwen32.pdf]

# MATH-500, Qwen3-4B to Qwen3-32B

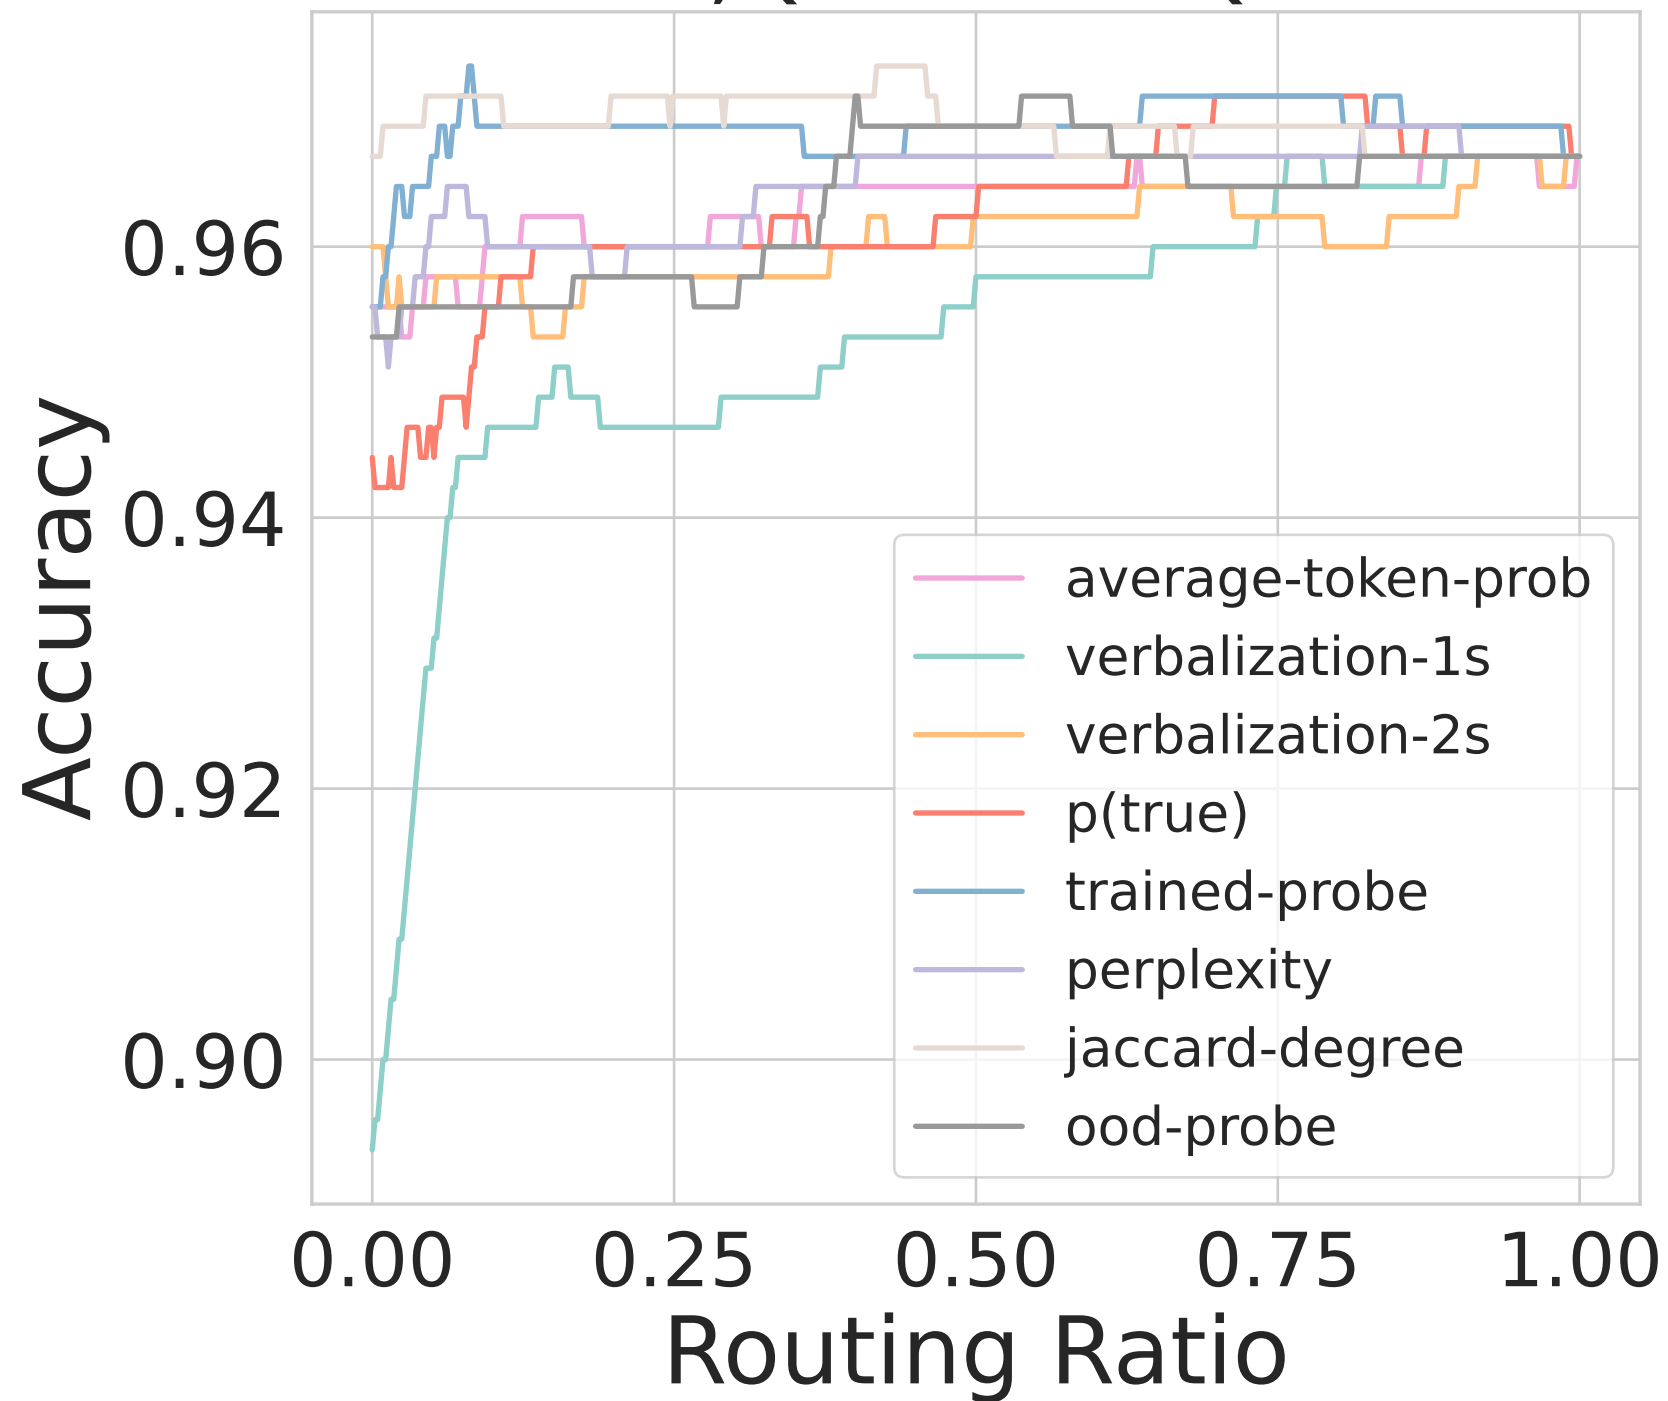

Supplement: supplementary_material [file rr_acc_math_500_Qwen3-4B_qwen32.pdf › Routing_SLM_LLMs/Uncertainty-based Routing/w_legend/to_qwen32/rr_acc_math_500_Qwen3-4B_qwen32.pdf]

# MATH-500, granite-3.1-8b to Qwen3-32B

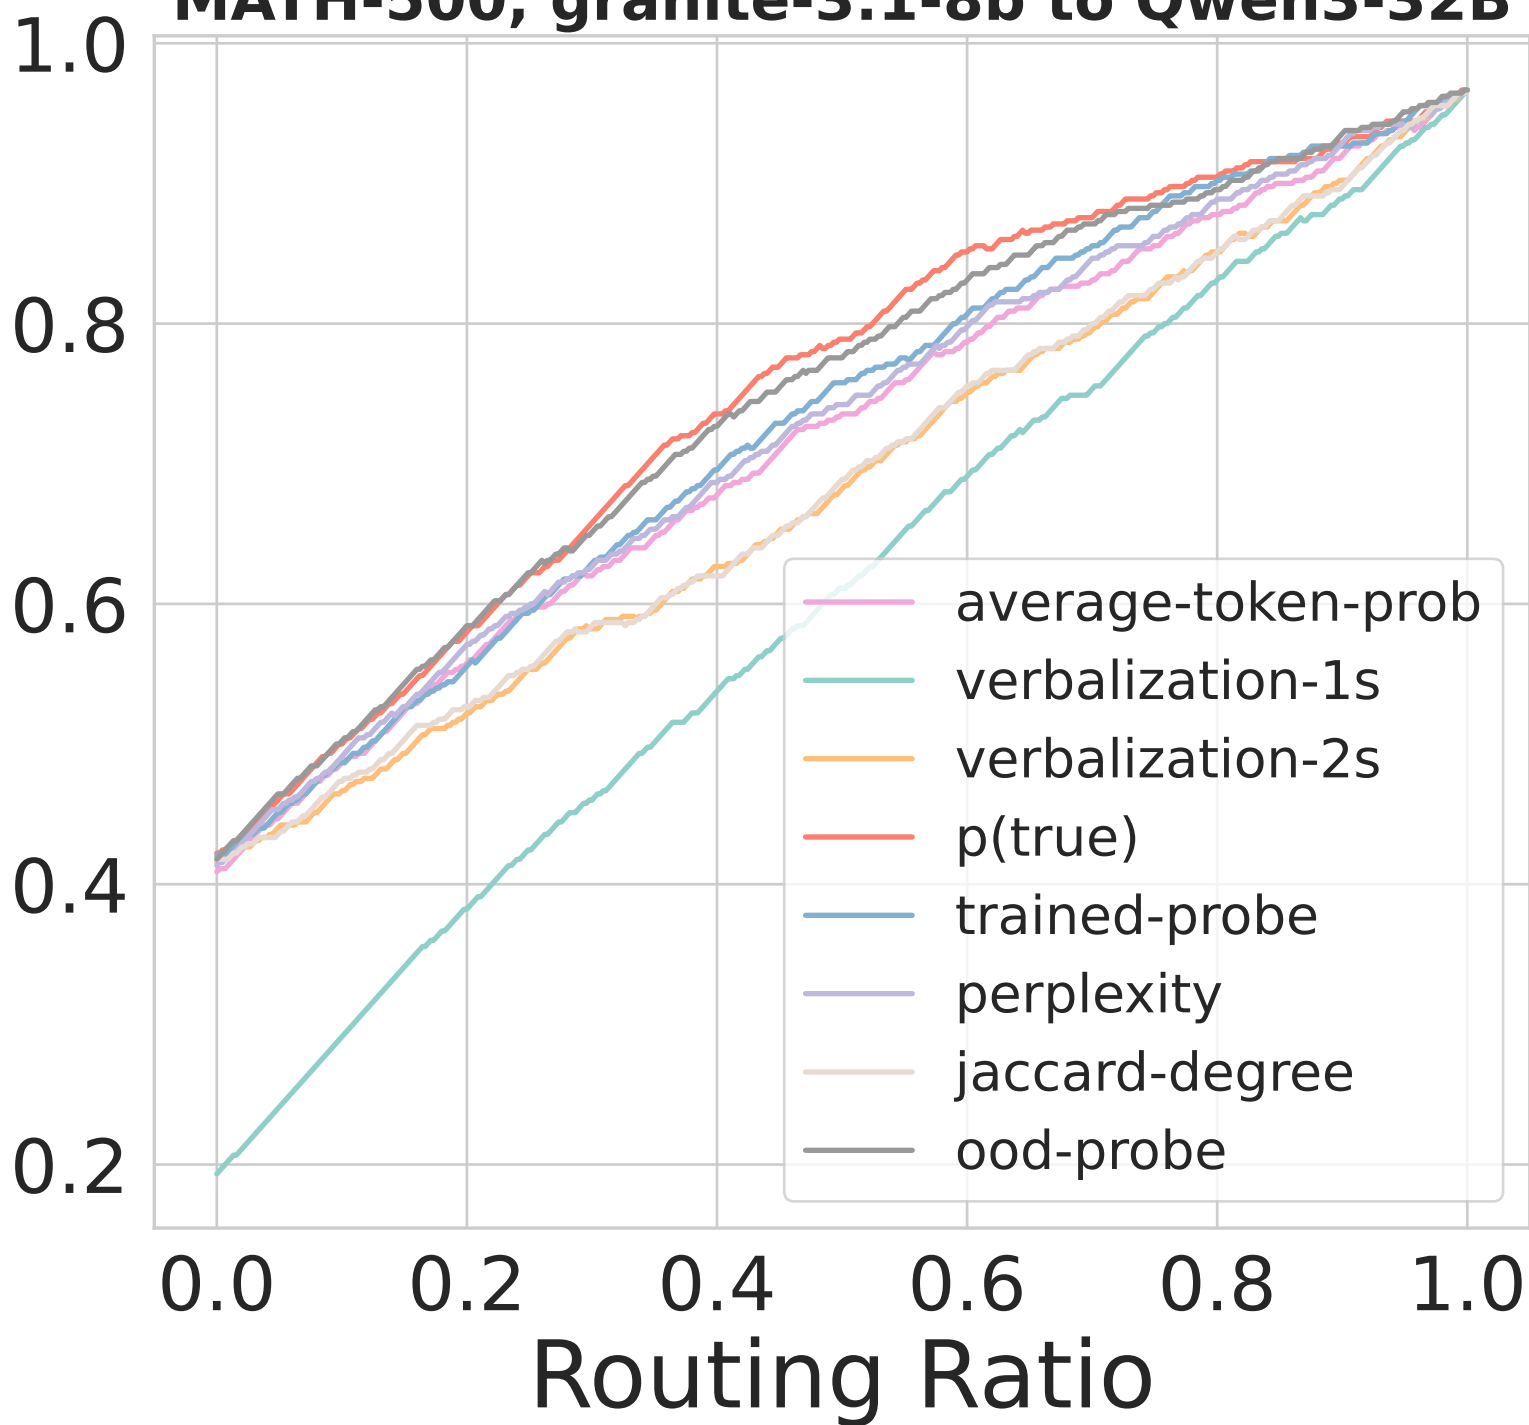

Supplement: supplementary_material [file rr_acc_math_500_granite-3.1-8b_qwen32.pdf › Routing_SLM_LLMs/Uncertainty-based Routing/w_legend/to_qwen32/rr_acc_math_500_granite-3.1-8b_qwen32.pdf]

# MATH-500, llama-3.1-8b to Qwen3-32B

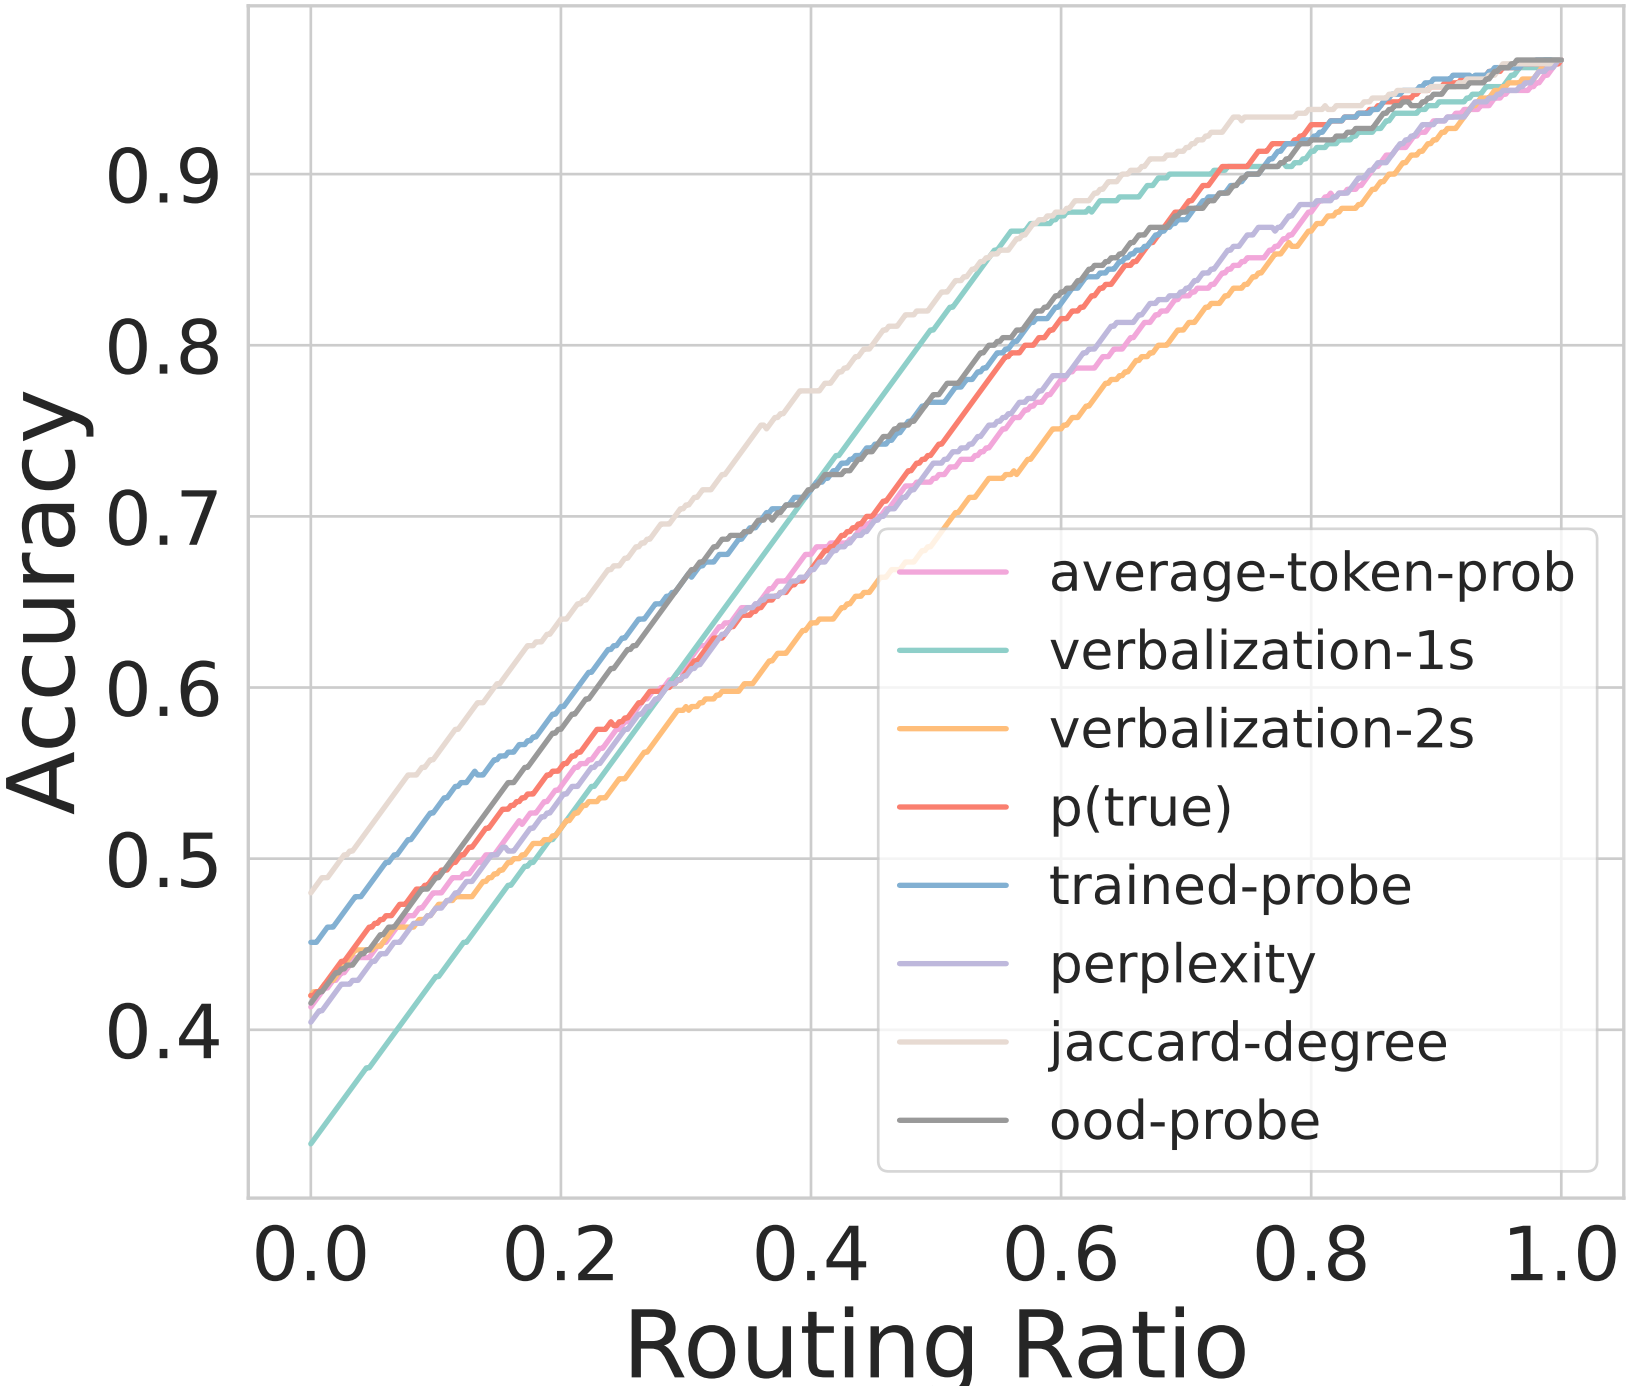

Supplement: supplementary_material [file rr_acc_math_500_llama-3.1-8b_qwen32.pdf › Routing_SLM_LLMs/Uncertainty-based Routing/w_legend/to_qwen32/rr_acc_math_500_llama-3.1-8b_qwen32.pdf]

# MATH-500, llama-3.2-3b to Qwen3-32B

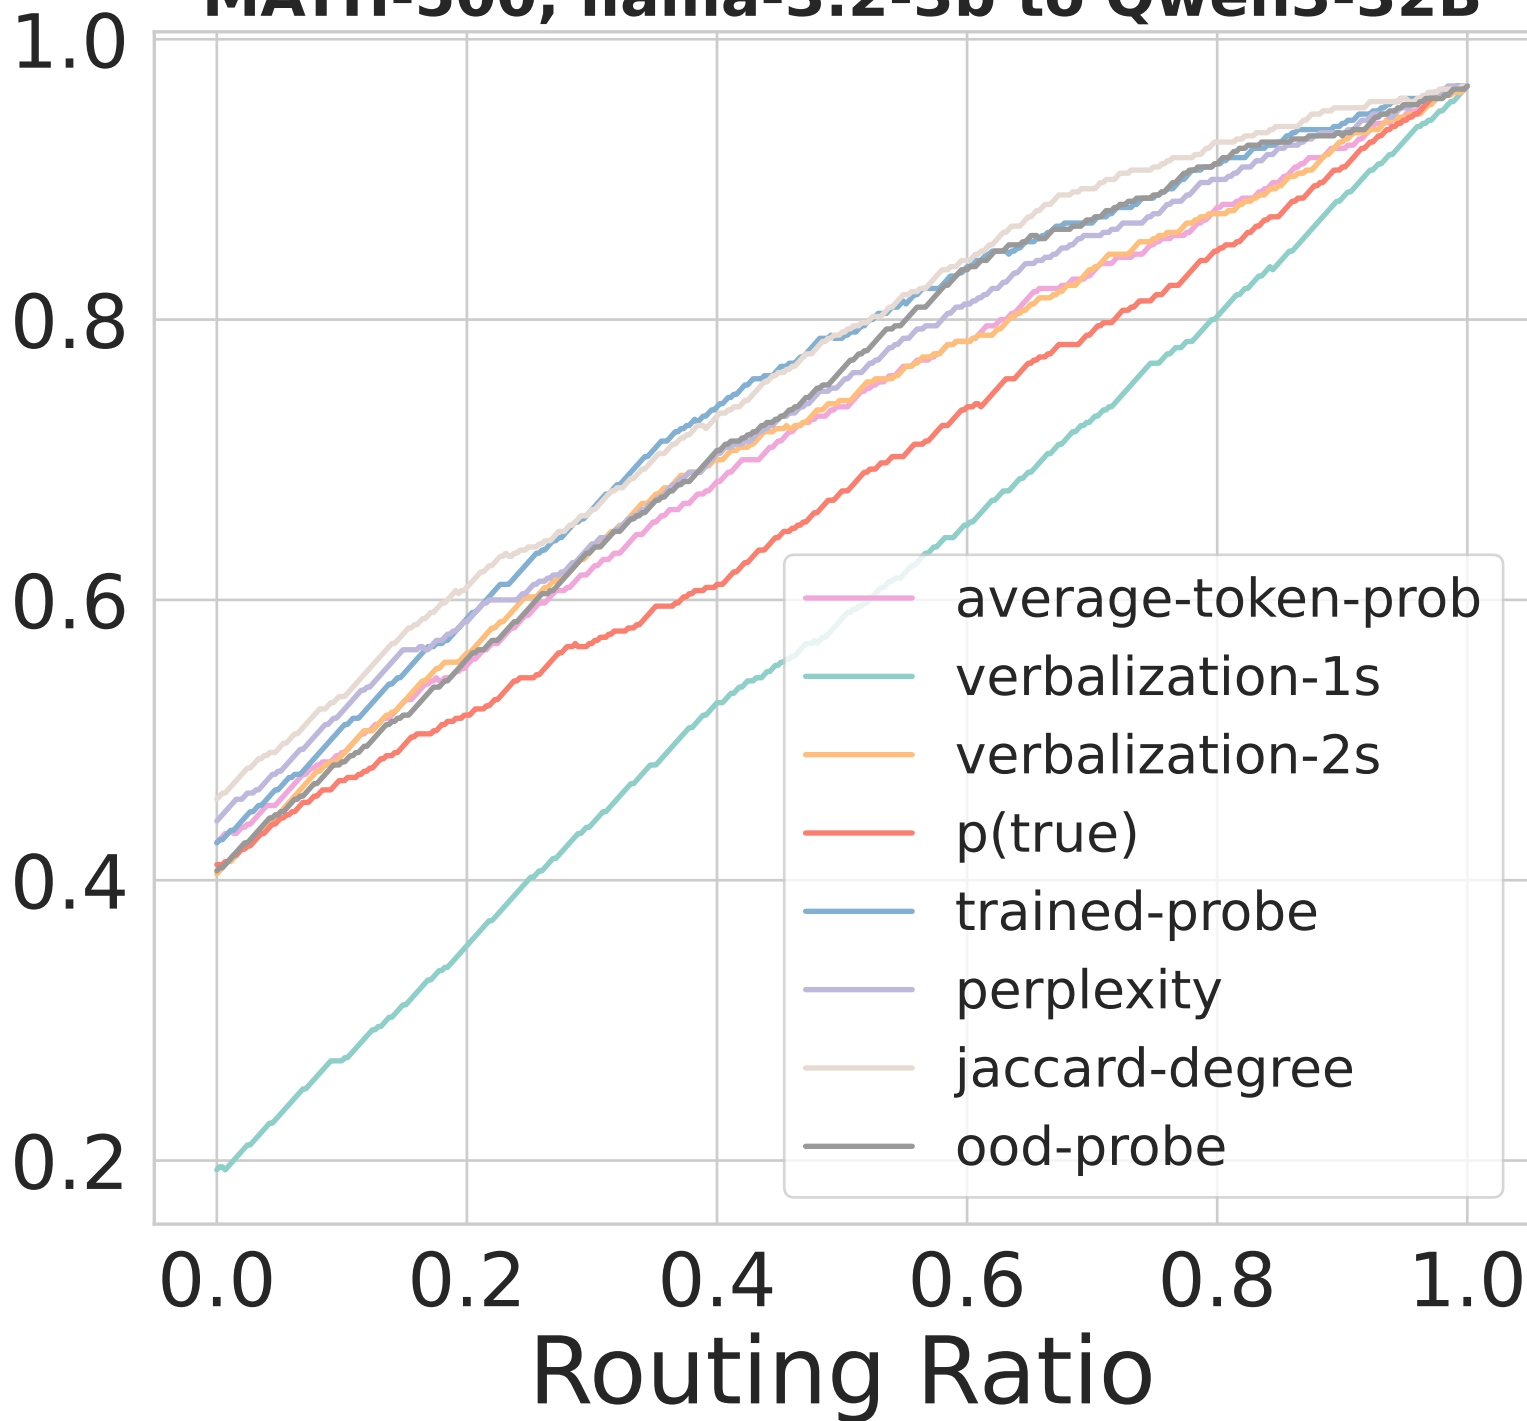

Supplement: supplementary_material [file rr_acc_math_500_llama-3.2-3b_qwen32.pdf › Routing_SLM_LLMs/Uncertainty-based Routing/w_legend/to_qwen32/rr_acc_math_500_llama-3.2-3b_qwen32.pdf]

**MATH-500, mistral-7b to Qwen3-32B**

Accuracy

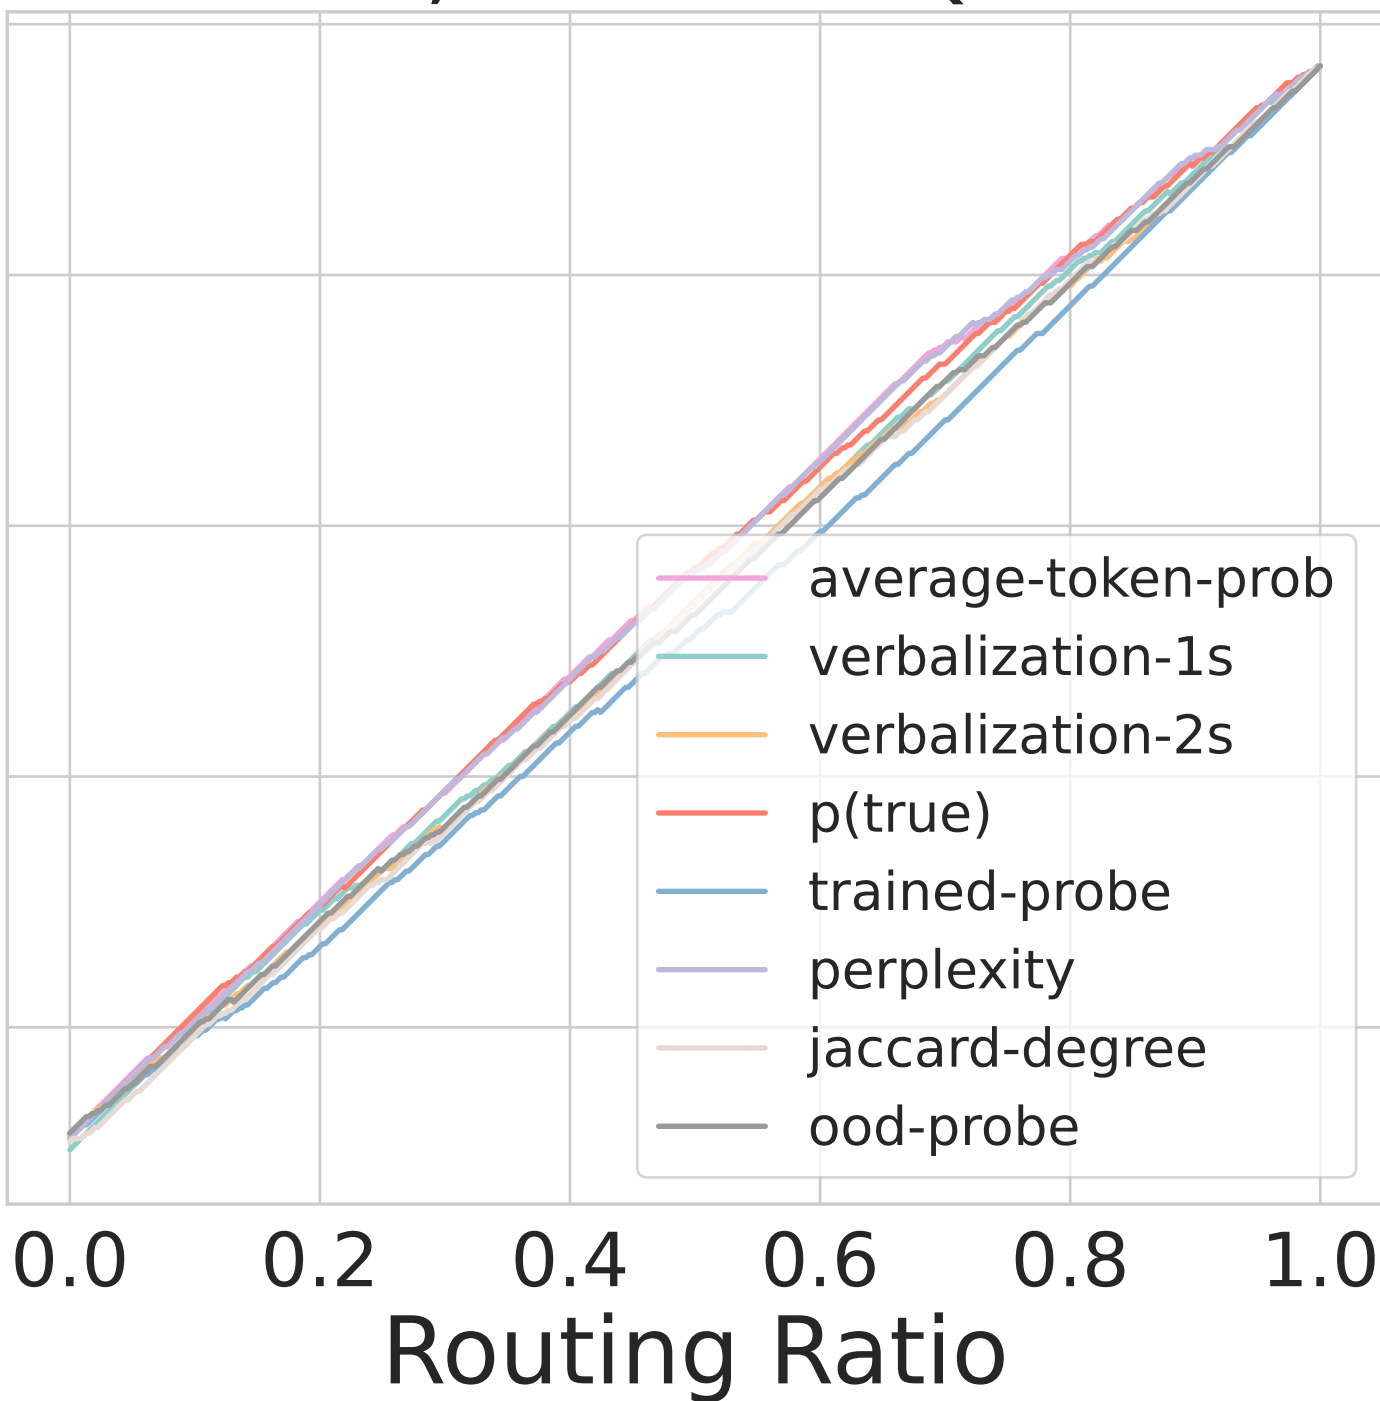

Supplement: supplementary_material [file rr_acc_math_500_mistral-7b_qwen32.pdf › Routing_SLM_LLMs/Uncertainty-based Routing/w_legend/to_qwen32/rr_acc_math_500_mistral-7b_qwen32.pdf]

# MATH-500, phi-3.5-mini to Qwen3-32B

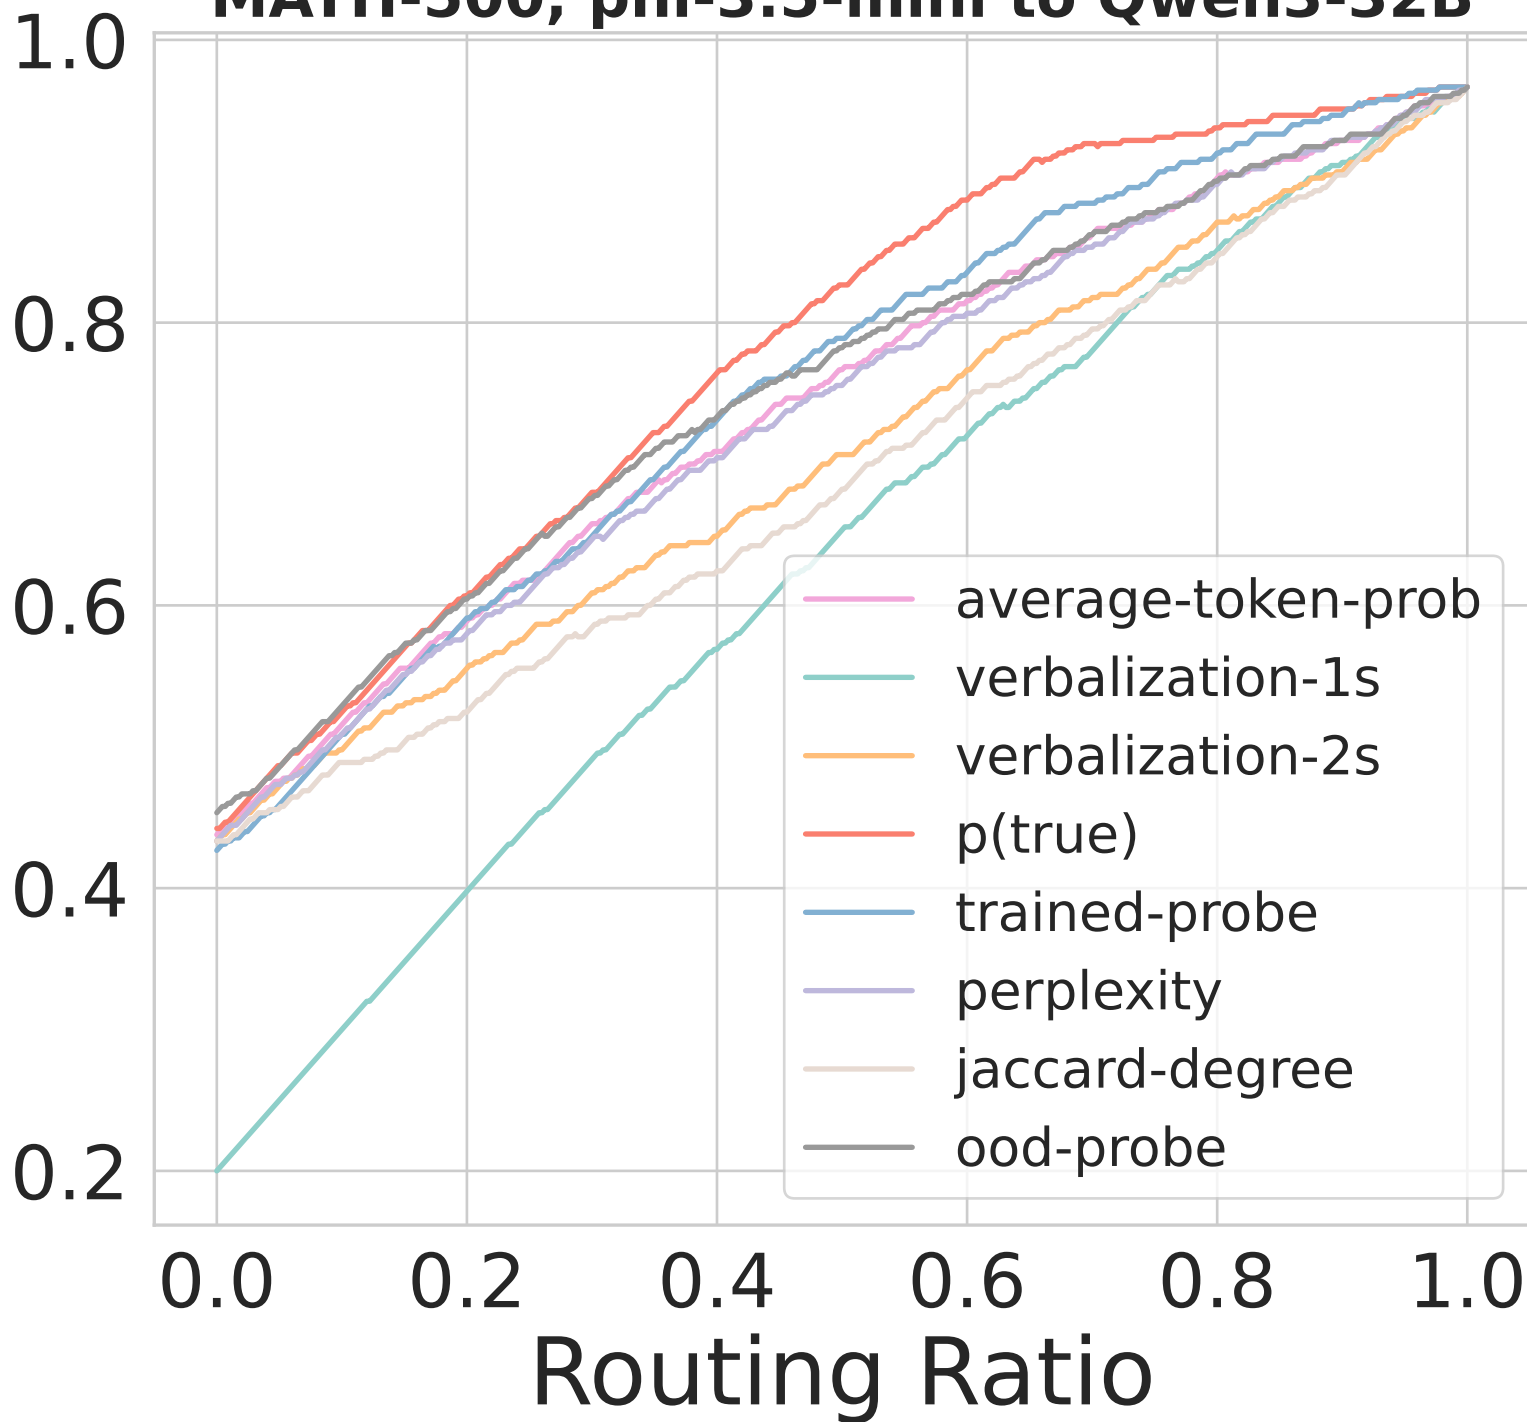

Supplement: supplementary_material [file rr_acc_math_500_phi-3.5-mini_qwen32.pdf › Routing_SLM_LLMs/Uncertainty-based Routing/w_legend/to_qwen32/rr_acc_math_500_phi-3.5-mini_qwen32.pdf]

# MATH-500, phi-4-mini-reasoning to Qwen3-32B

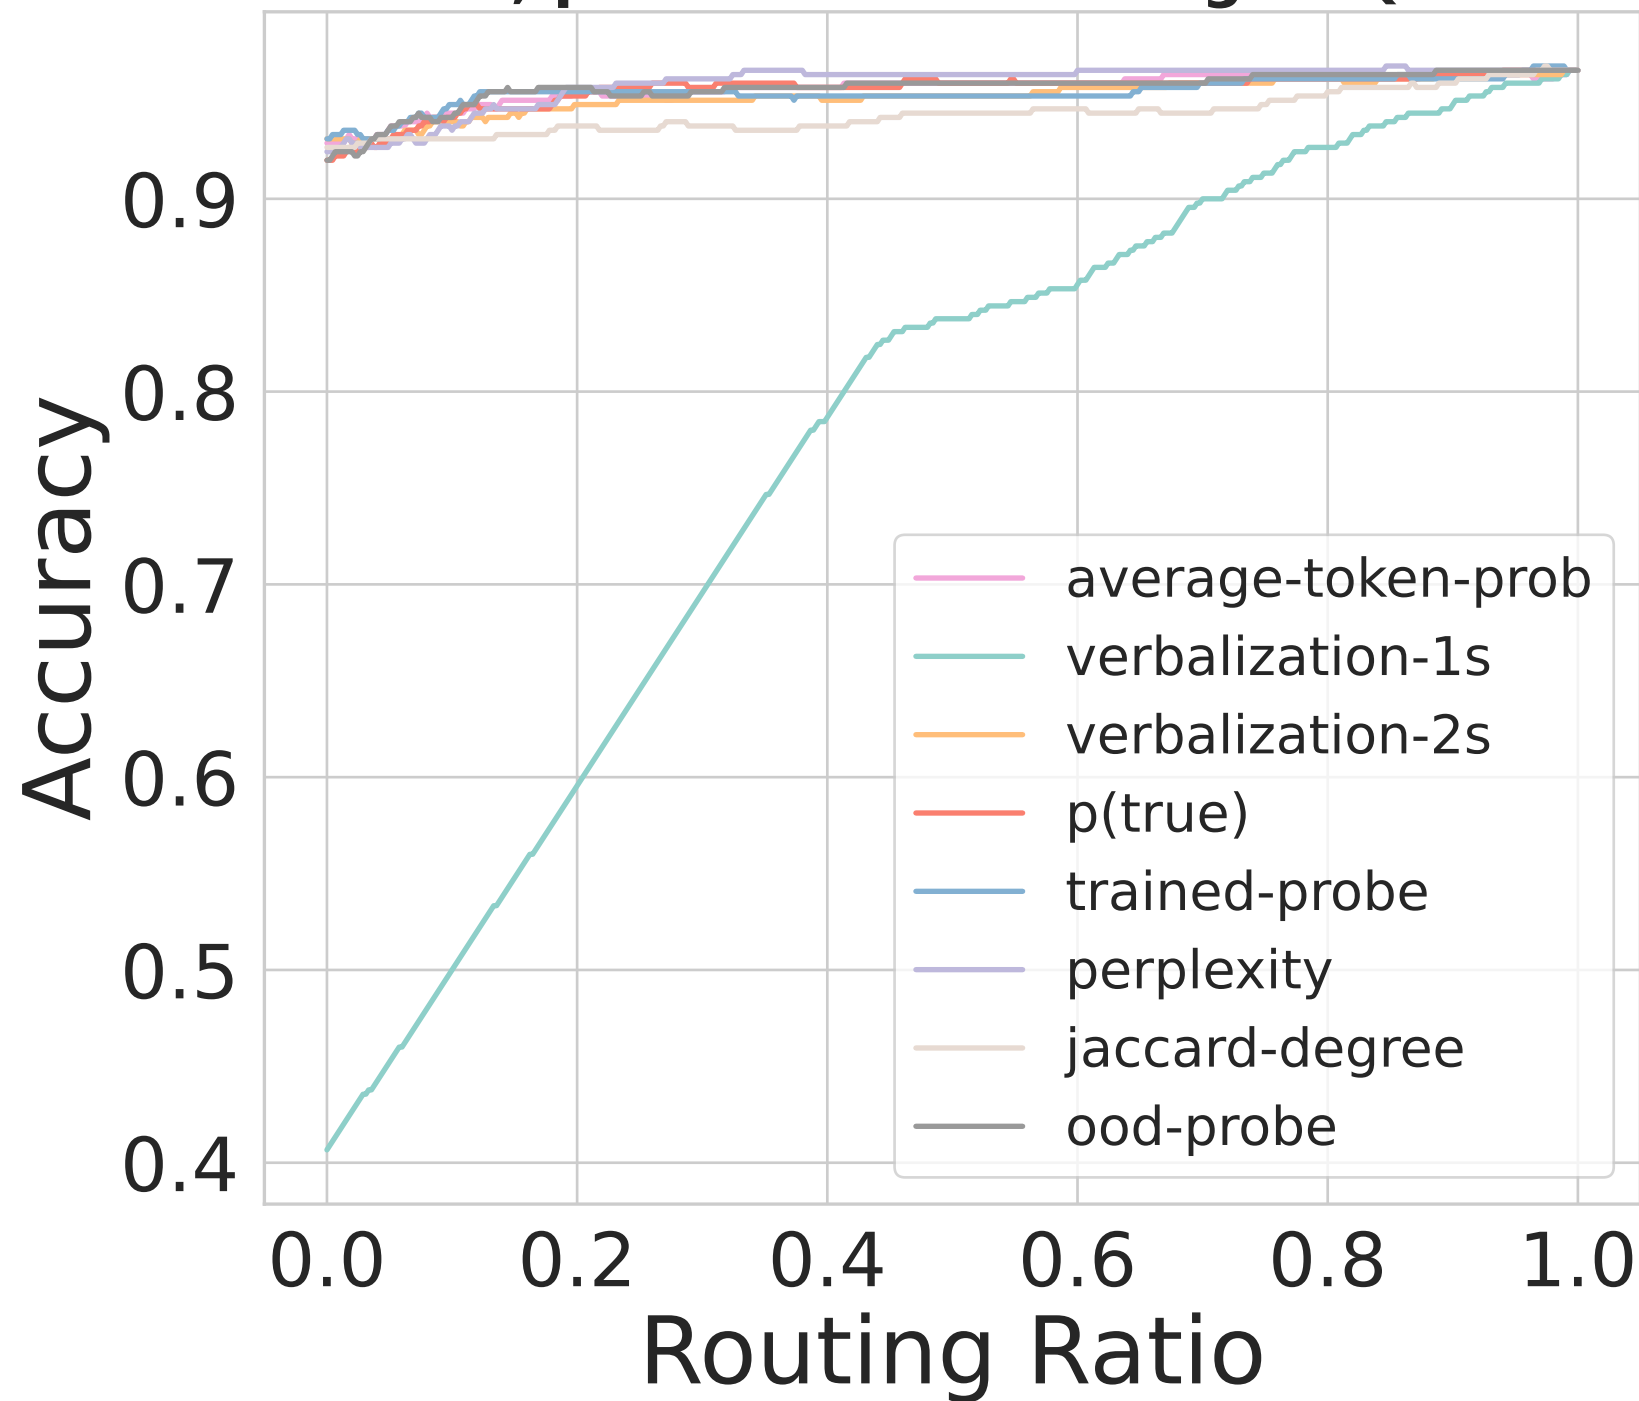

Supplement: supplementary_material [file rr_acc_math_500_phi-4-mini-reasoning_qwen32.pdf › Routing_SLM_LLMs/Uncertainty-based Routing/w_legend/to_qwen32/rr_acc_math_500_phi-4-mini-reasoning_qwen32.pdf]

**MATH-500, qwen-2.5-7b to Qwen3-32B**

Accuracy

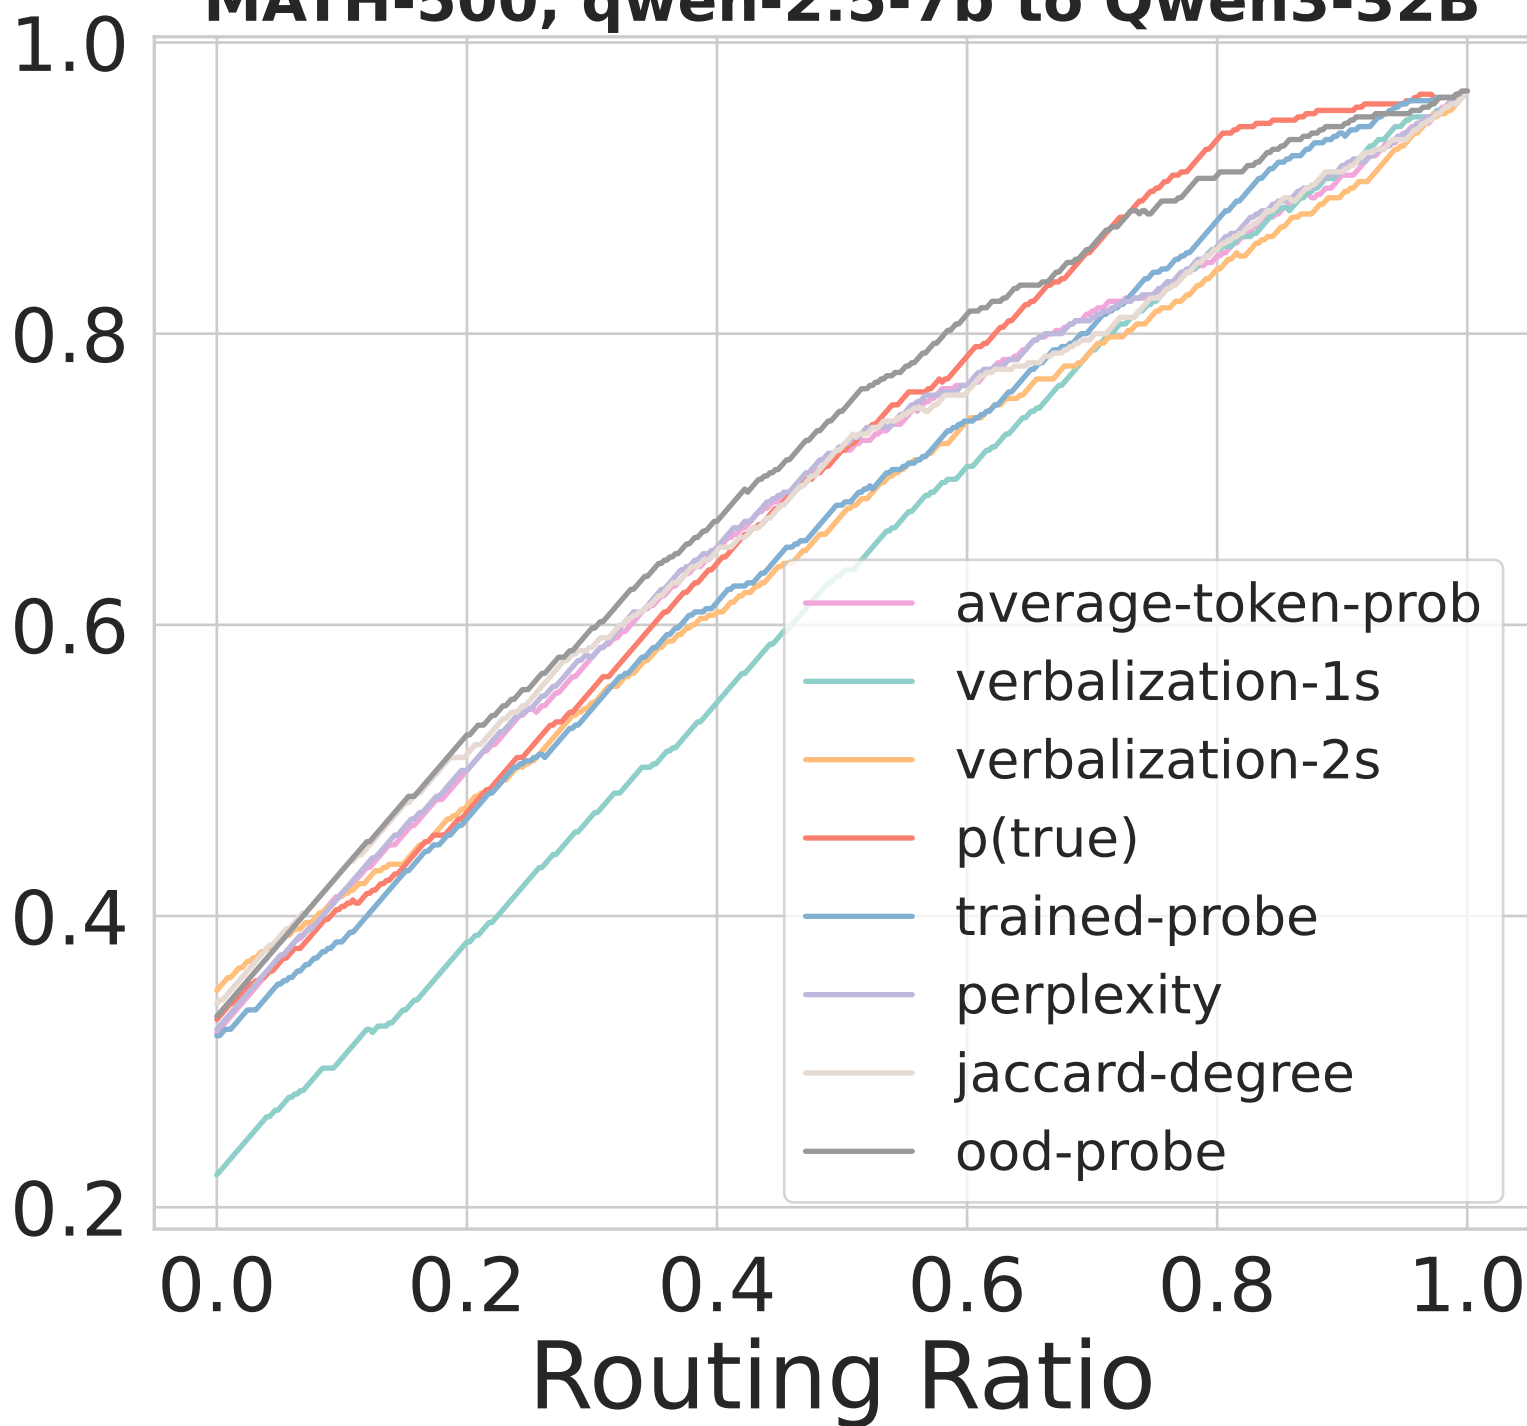

Supplement: supplementary_material [file rr_acc_math_500_qwen-2.5-7b_qwen32.pdf › Routing_SLM_LLMs/Uncertainty-based Routing/w_legend/to_qwen32/rr_acc_math_500_qwen-2.5-7b_qwen32.pdf]

# MATH-500, rwkv to Qwen3-32B

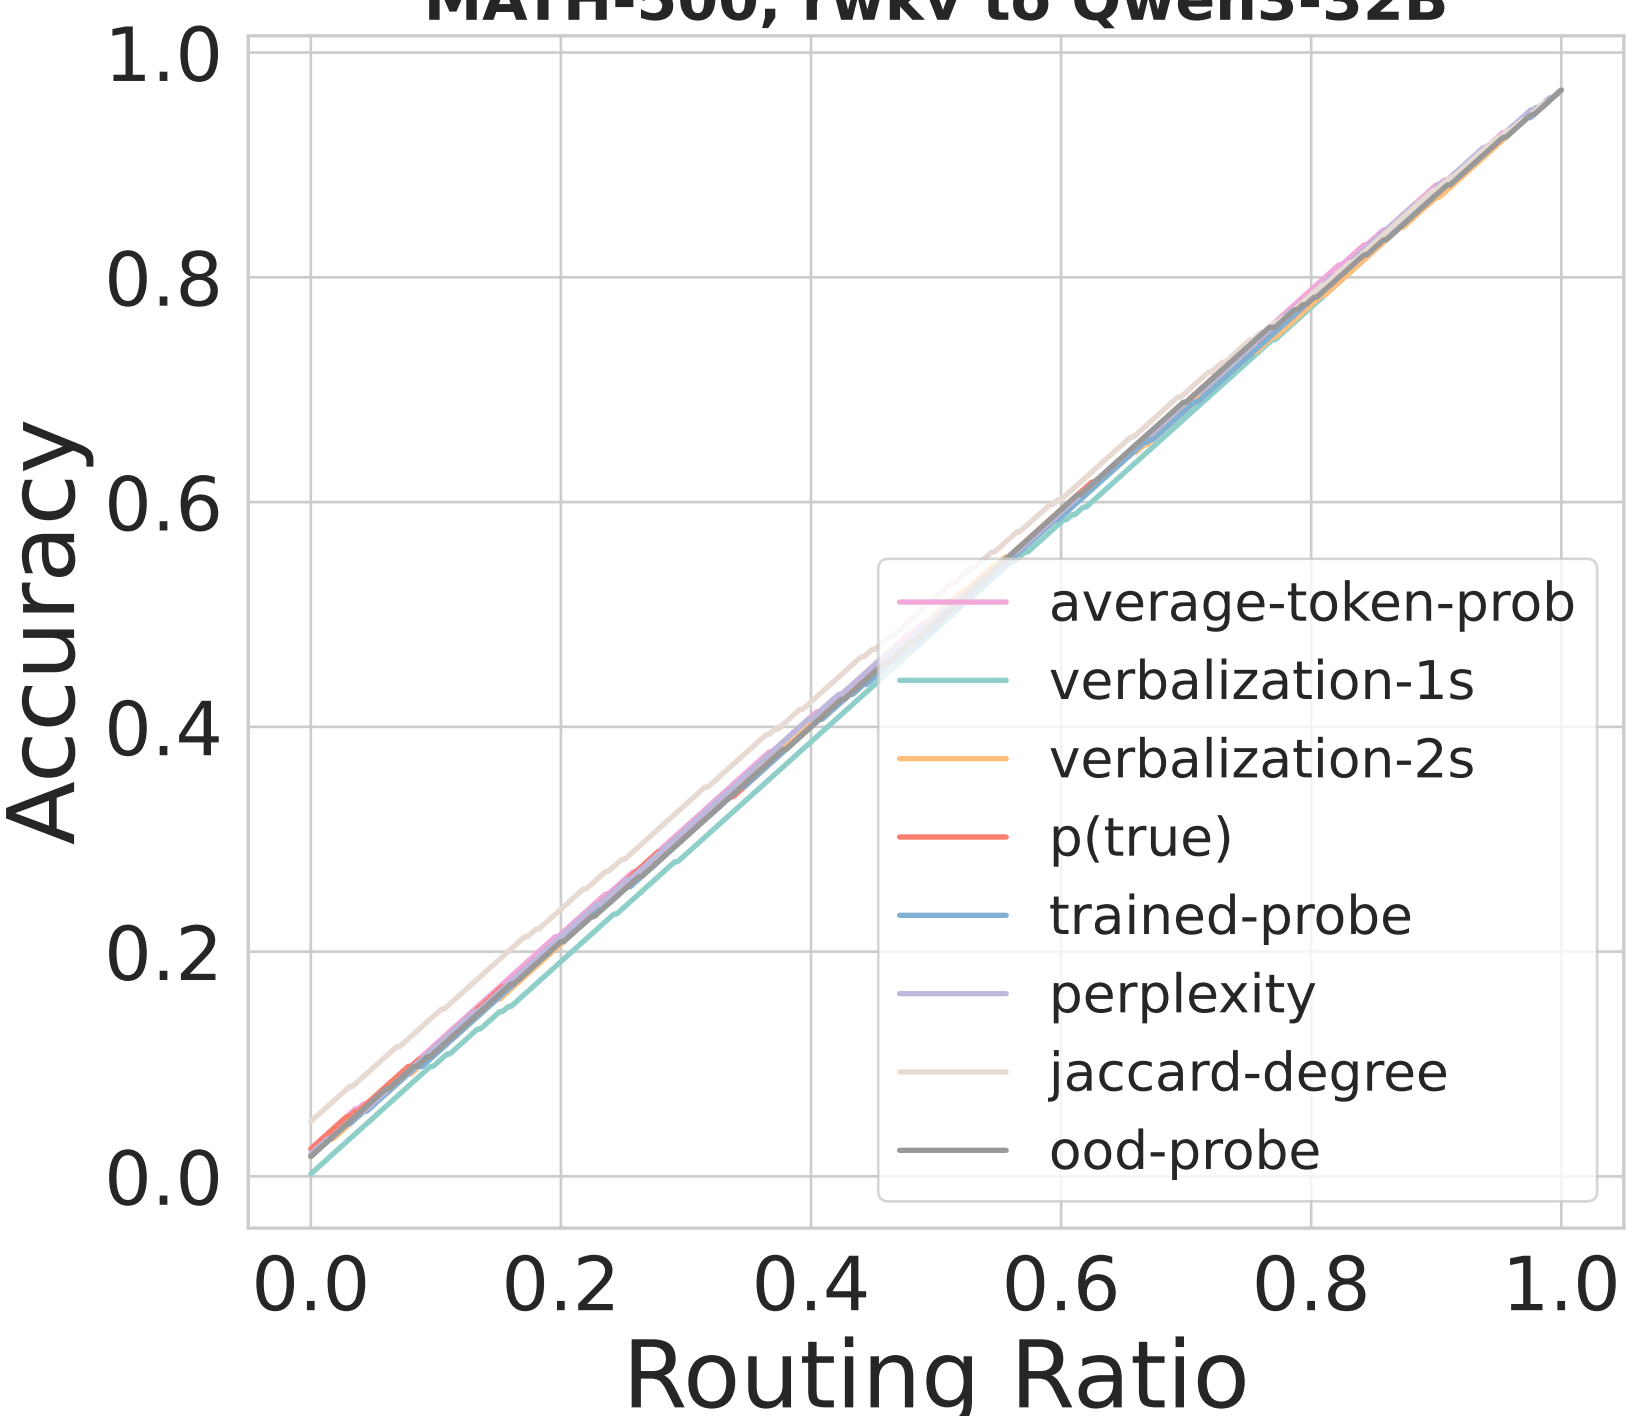

Supplement: supplementary_material [file rr_acc_math_500_rwkv_qwen32.pdf › Routing_SLM_LLMs/Uncertainty-based Routing/w_legend/to_qwen32/rr_acc_math_500_rwkv_qwen32.pdf]

# MMLU, Qwen3-0.6B to Qwen3-32B

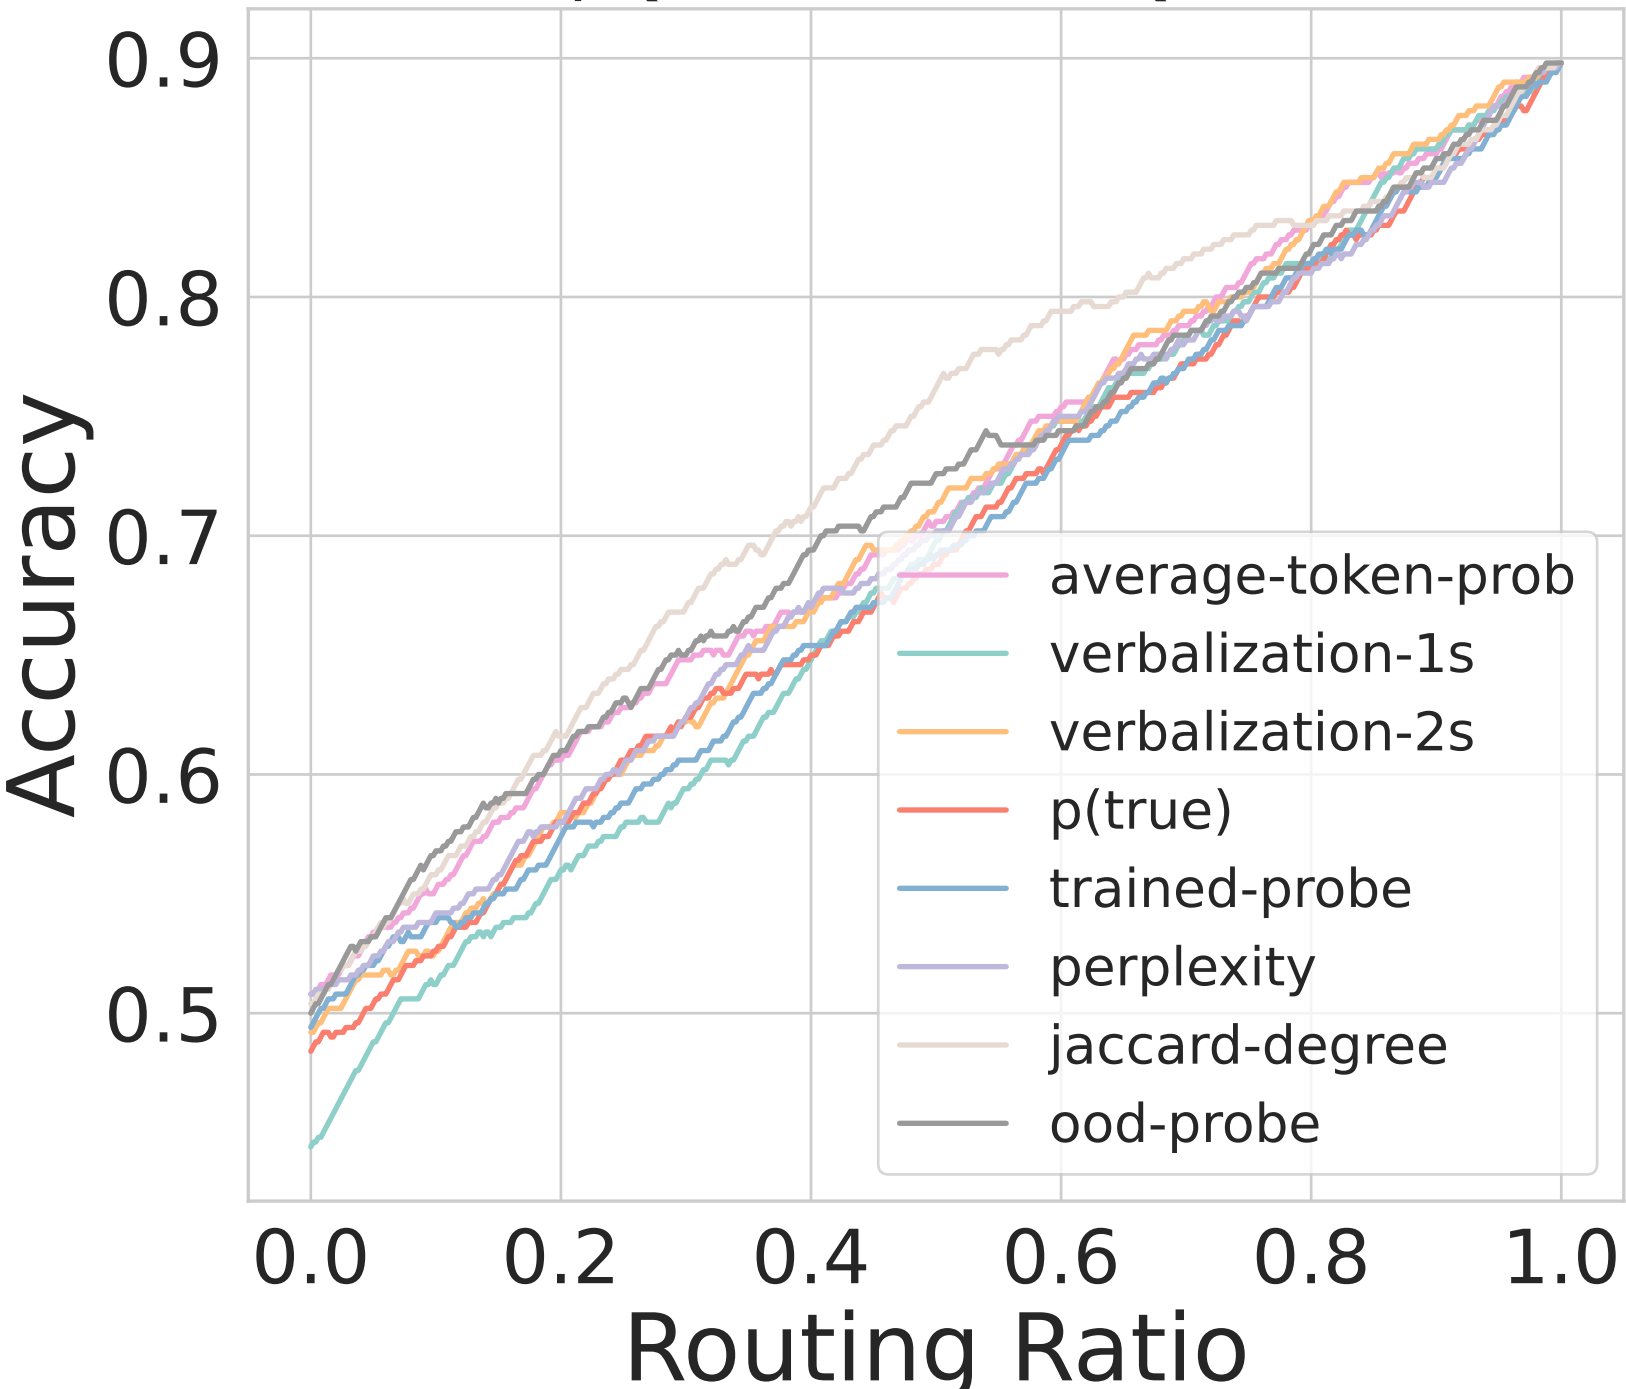

Supplement: supplementary_material [file rr_acc_mmlu_Qwen3-0.6B_qwen32.pdf › Routing_SLM_LLMs/Uncertainty-based Routing/w_legend/to_qwen32/rr_acc_mmlu_Qwen3-0.6B_qwen32.pdf]

# MMLU, Qwen3-1.7B to Qwen3-32B



verbalization-1s

p(true)

## perplexity

ood-probe

|  |  |
|--|--|
|  |  |
|  |  |
|  |  |

Supplement: supplementary_material [file rr_acc_mmlu_Qwen3-1.7B_qwen32.pdf › Routing_SLM_LLMs/Uncertainty-based Routing/w_legend/to_qwen32/rr_acc_mmlu_Qwen3-1.7B_qwen32.pdf]

**MMLU, Qwen3-4B to Qwen3-32B**

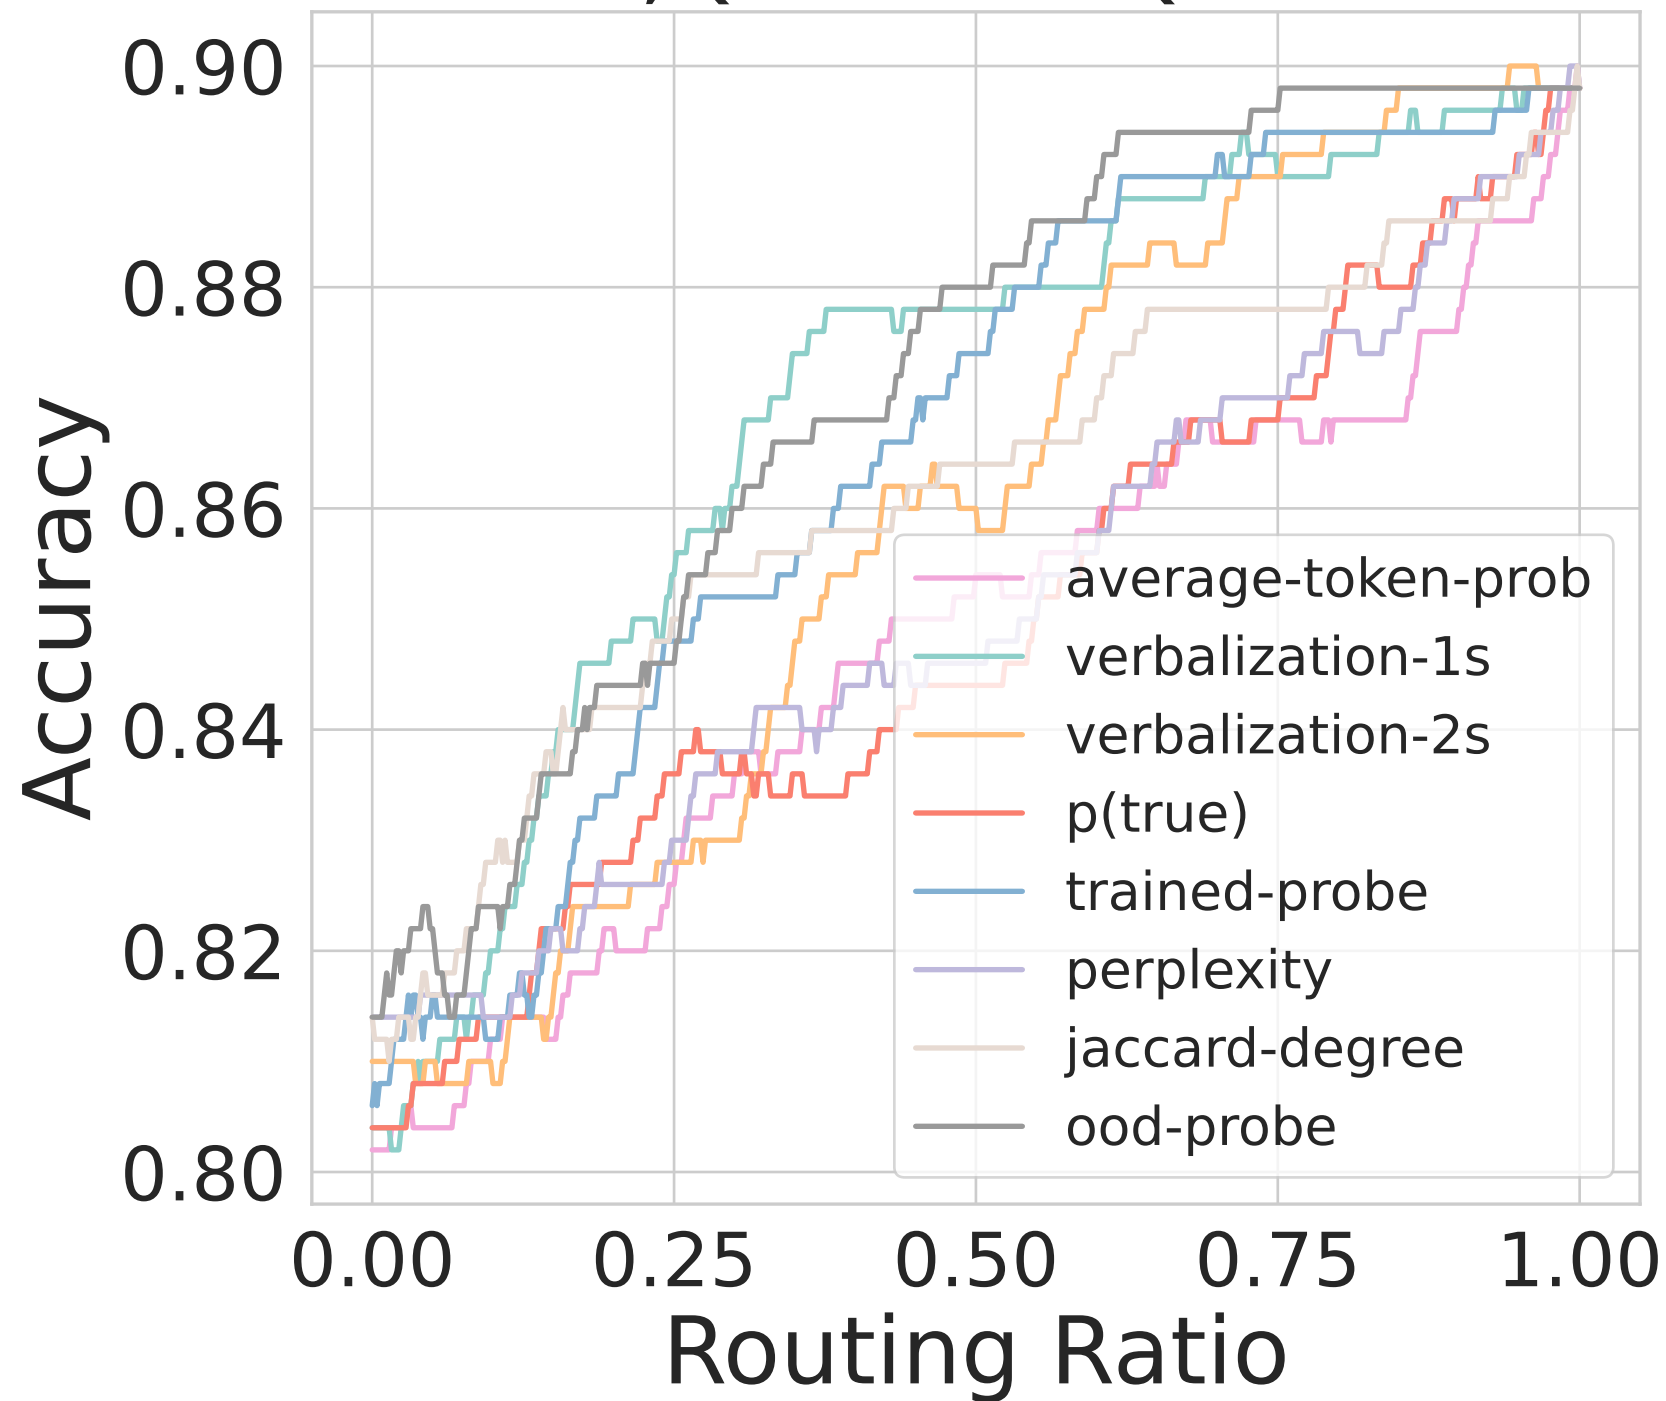

Supplement: supplementary_material [file rr_acc_mmlu_Qwen3-4B_qwen32.pdf › Routing_SLM_LLMs/Uncertainty-based Routing/w_legend/to_qwen32/rr_acc_mmlu_Qwen3-4B_qwen32.pdf]

**MMLU, granite-3.1-8b to Qwen3-32B**

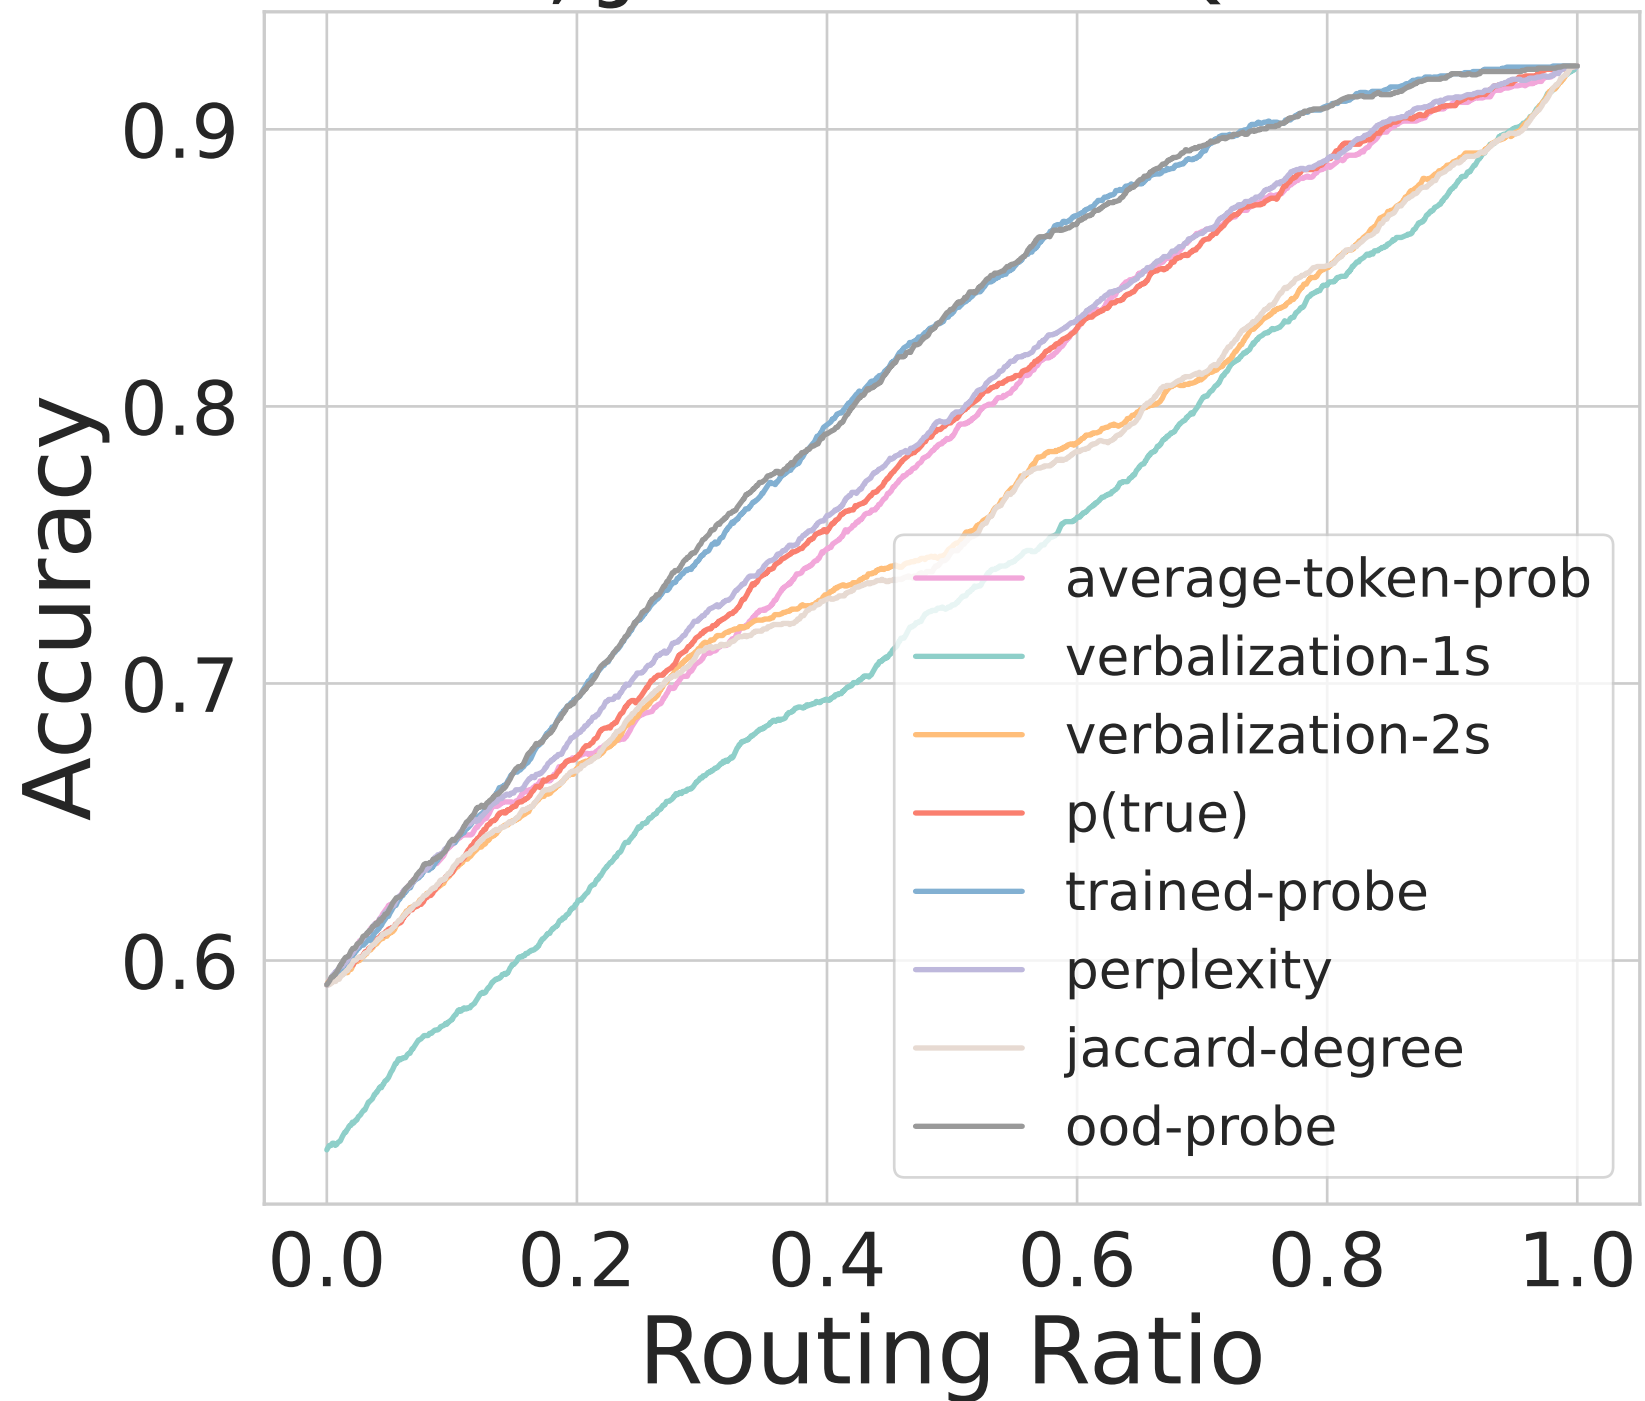

Supplement: supplementary_material [file rr_acc_mmlu_granite-3.1-8b_qwen32.pdf › Routing_SLM_LLMs/Uncertainty-based Routing/w_legend/to_qwen32/rr_acc_mmlu_granite-3.1-8b_qwen32.pdf]

## MMLU, llama-3.1-8b to Qwen3-32B

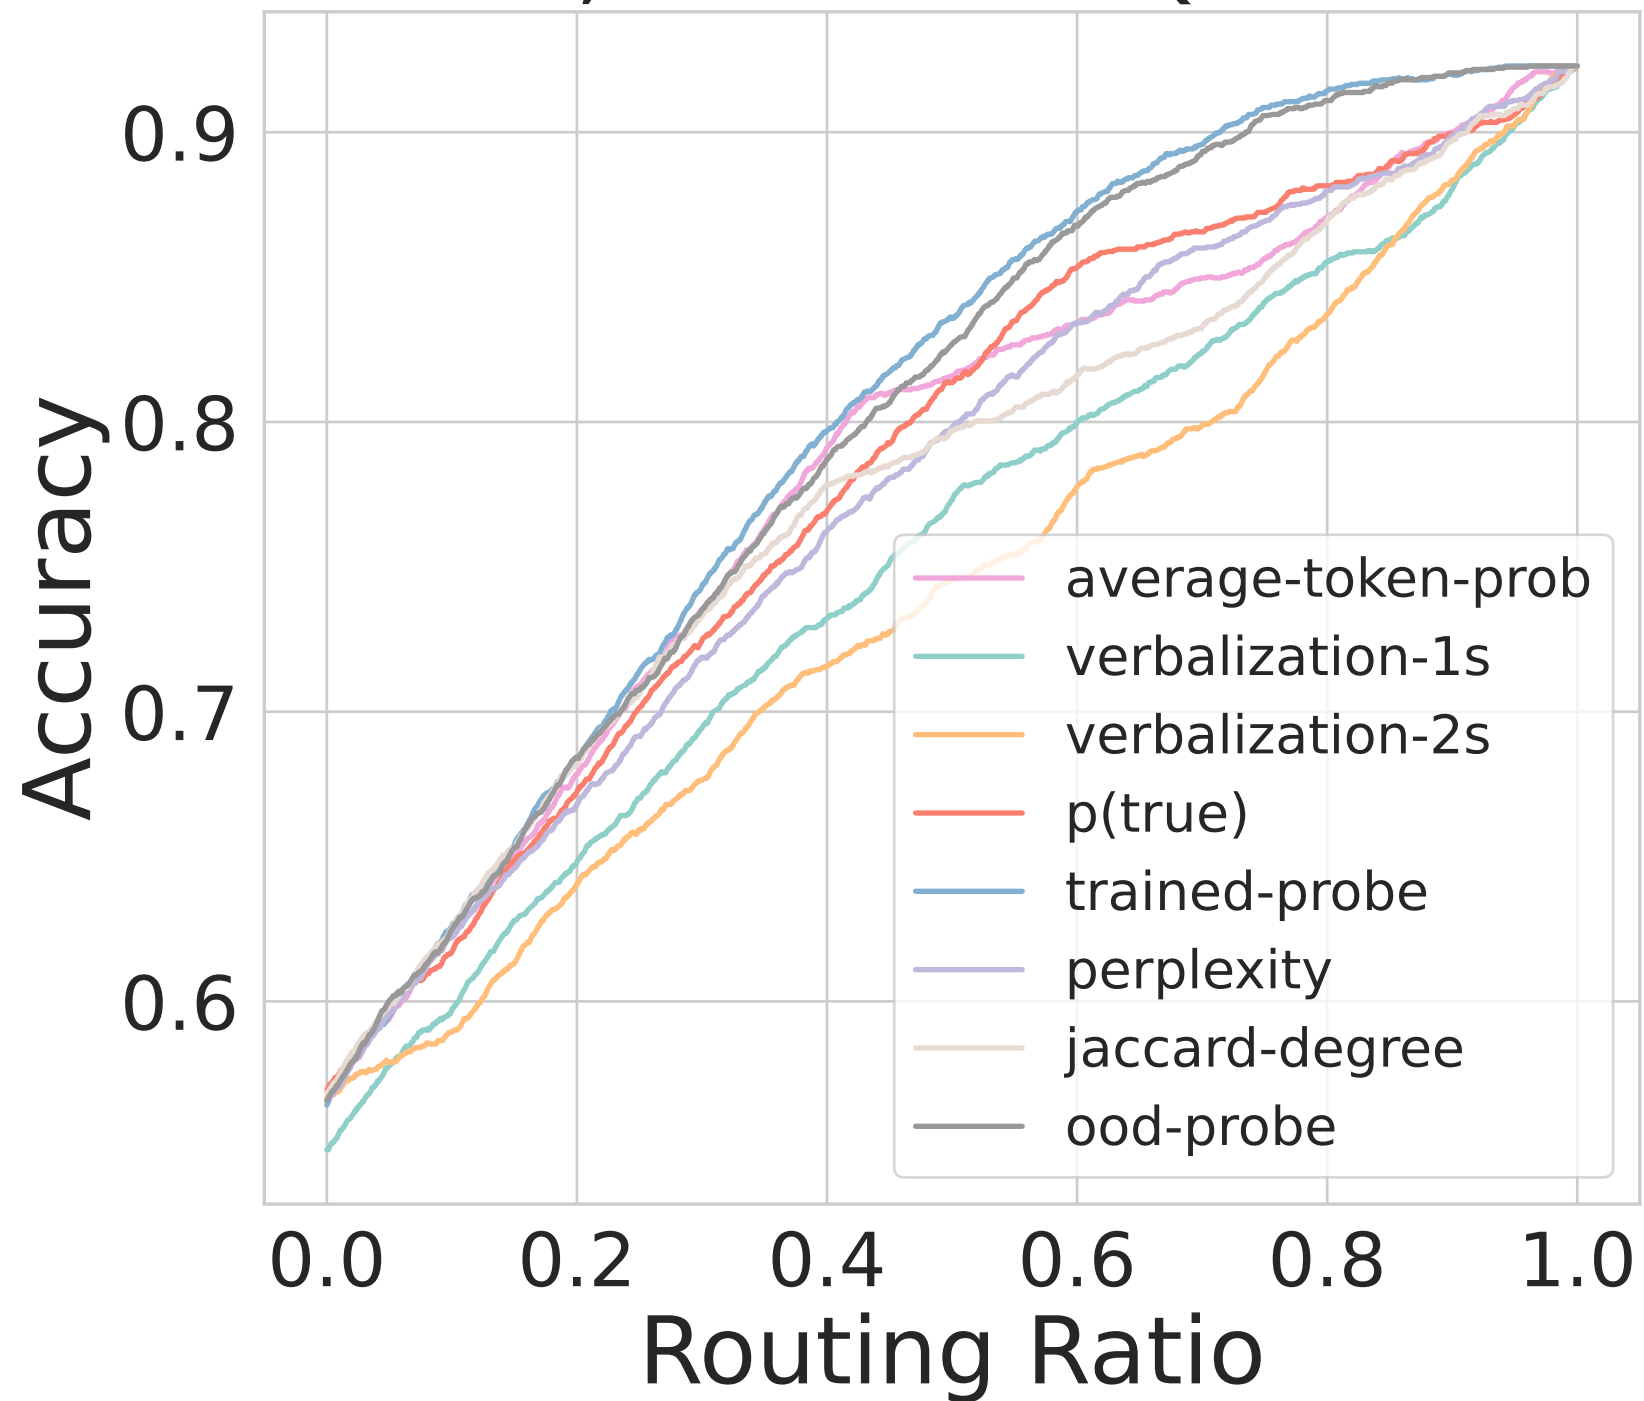

Supplement: supplementary_material [file rr_acc_mmlu_llama-3.1-8b_qwen32.pdf › Routing_SLM_LLMs/Uncertainty-based Routing/w_legend/to_qwen32/rr_acc_mmlu_llama-3.1-8b_qwen32.pdf]

# MMLU, llama-3.2-1b to Qwen3-32B

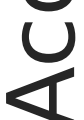

Supplement: supplementary_material [file rr_acc_mmlu_llama-3.2-1b_qwen32.pdf › Routing_SLM_LLMs/Uncertainty-based Routing/w_legend/to_qwen32/rr_acc_mmlu_llama-3.2-1b_qwen32.pdf]

# MMLU, llama-3.2-3b to Qwen3-32B

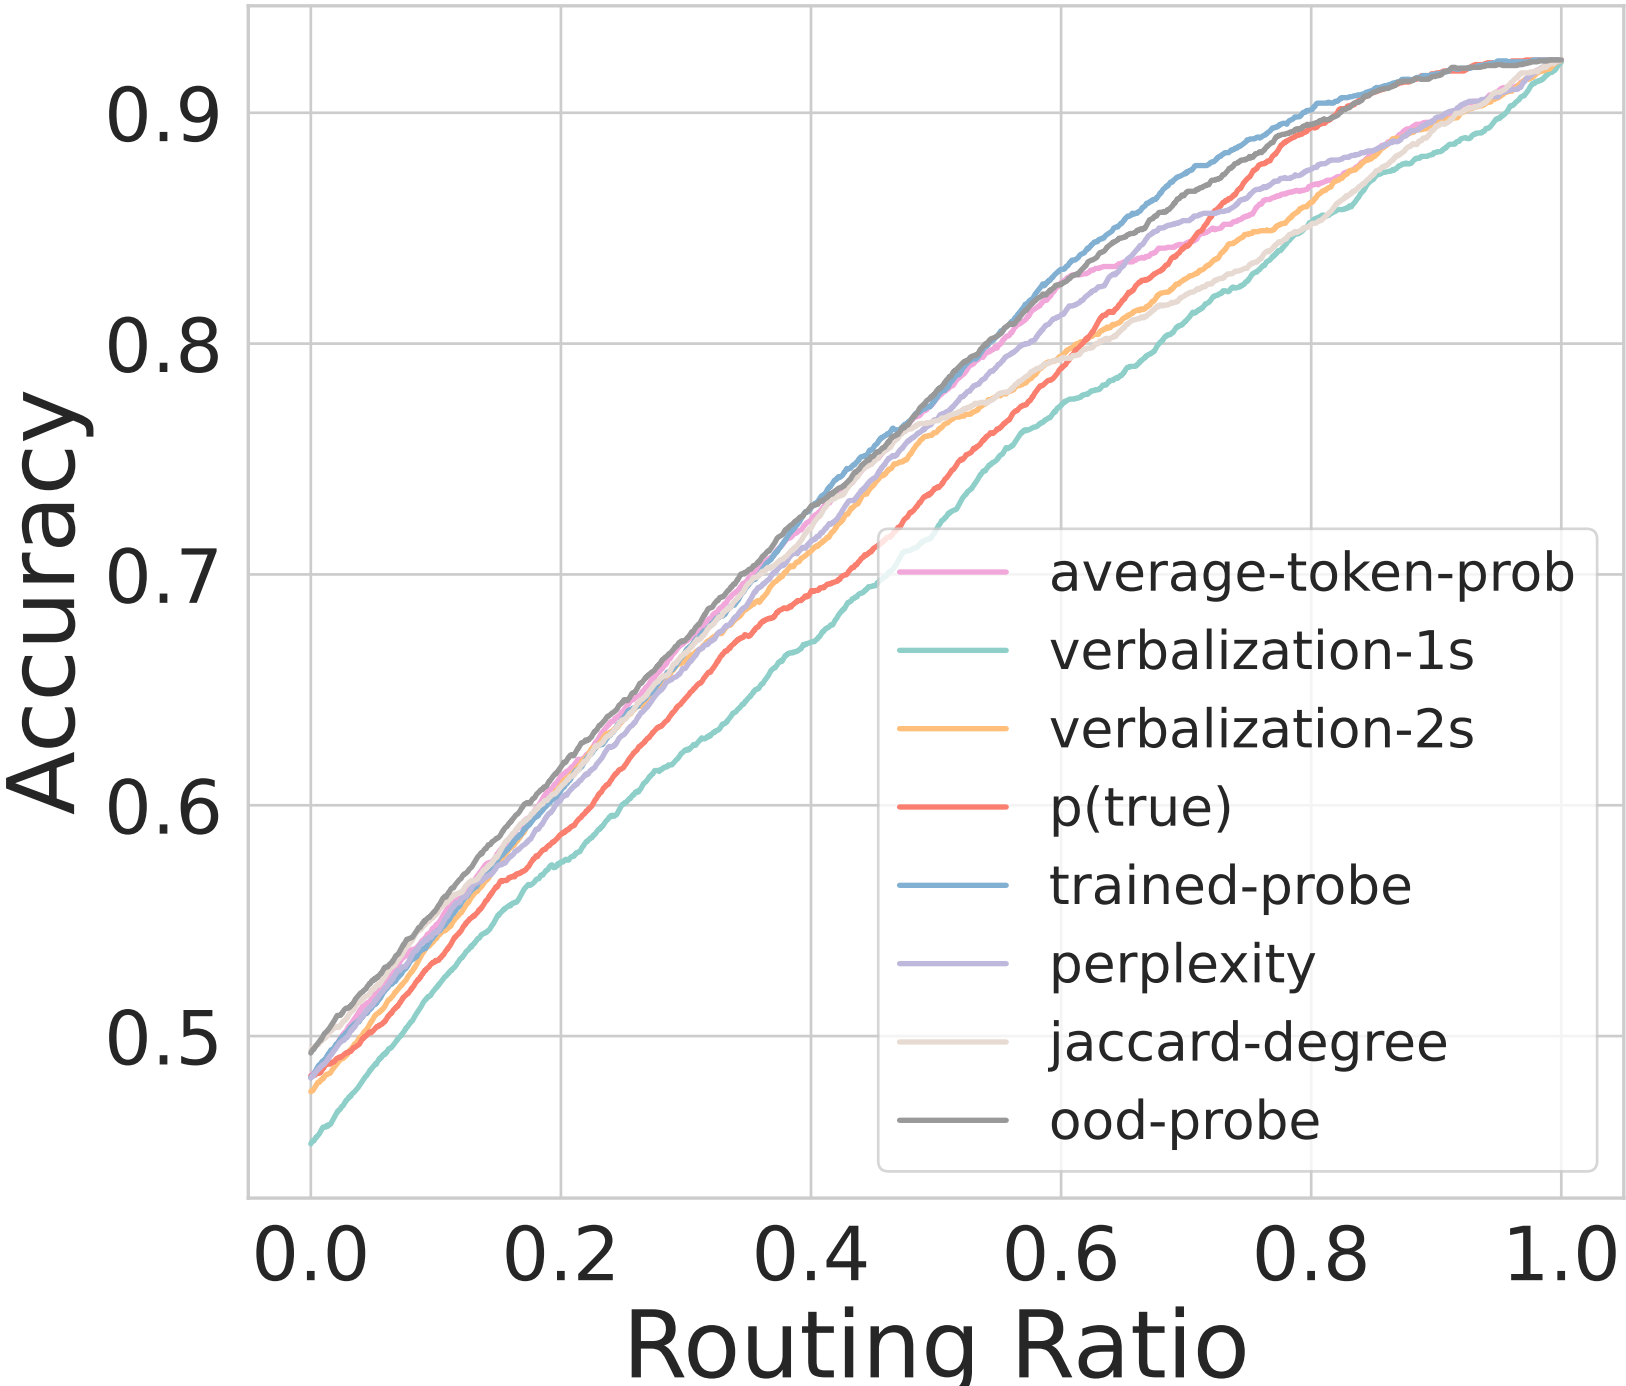

Supplement: supplementary_material [file rr_acc_mmlu_llama-3.2-3b_qwen32.pdf › Routing_SLM_LLMs/Uncertainty-based Routing/w_legend/to_qwen32/rr_acc_mmlu_llama-3.2-3b_qwen32.pdf]

# MMLU, mistral-7b to Qwen3-32B

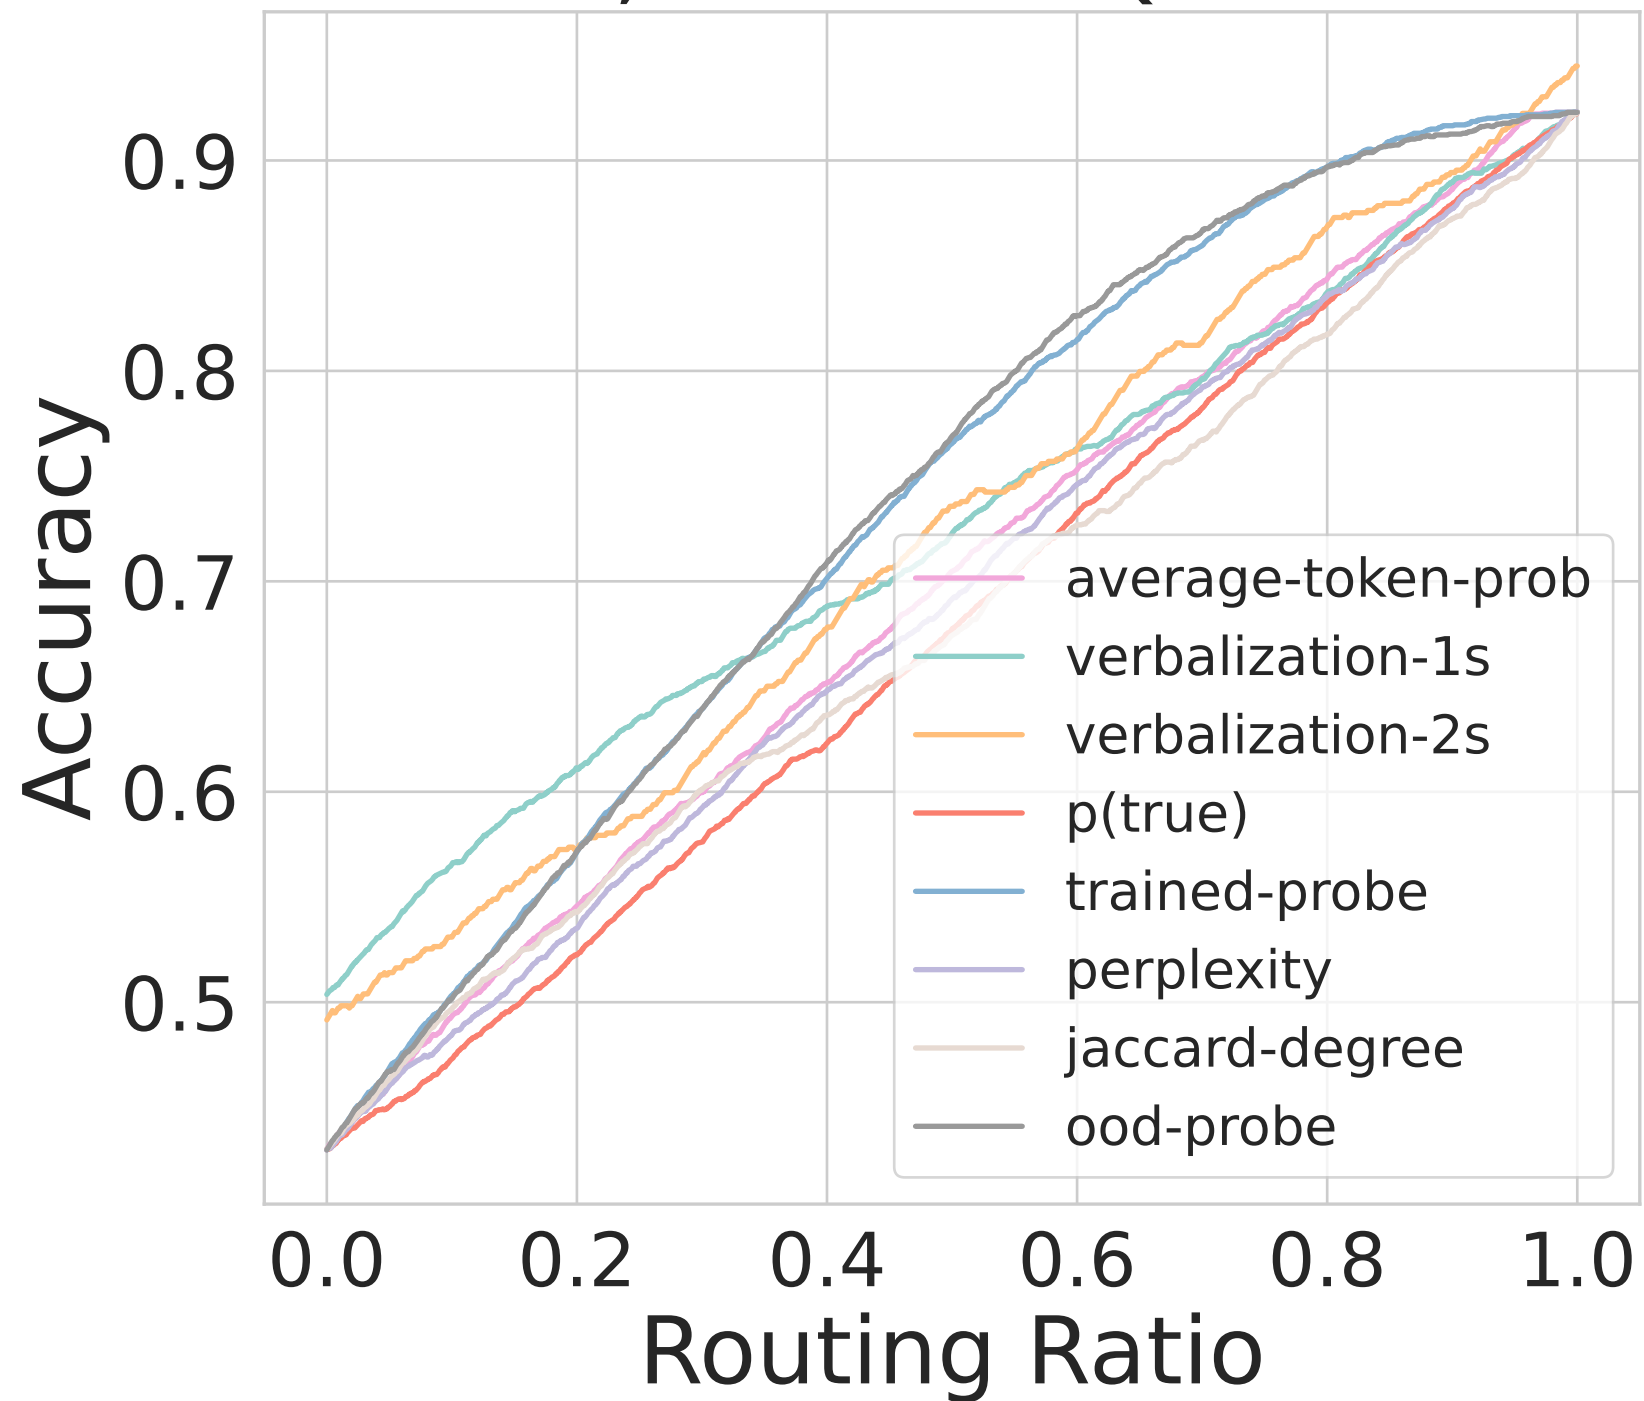

Supplement: supplementary_material [file rr_acc_mmlu_mistral-7b_qwen32.pdf › Routing_SLM_LLMs/Uncertainty-based Routing/w_legend/to_qwen32/rr_acc_mmlu_mistral-7b_qwen32.pdf]

## MMLU, phi-3.5-mini to Qwen3-32B

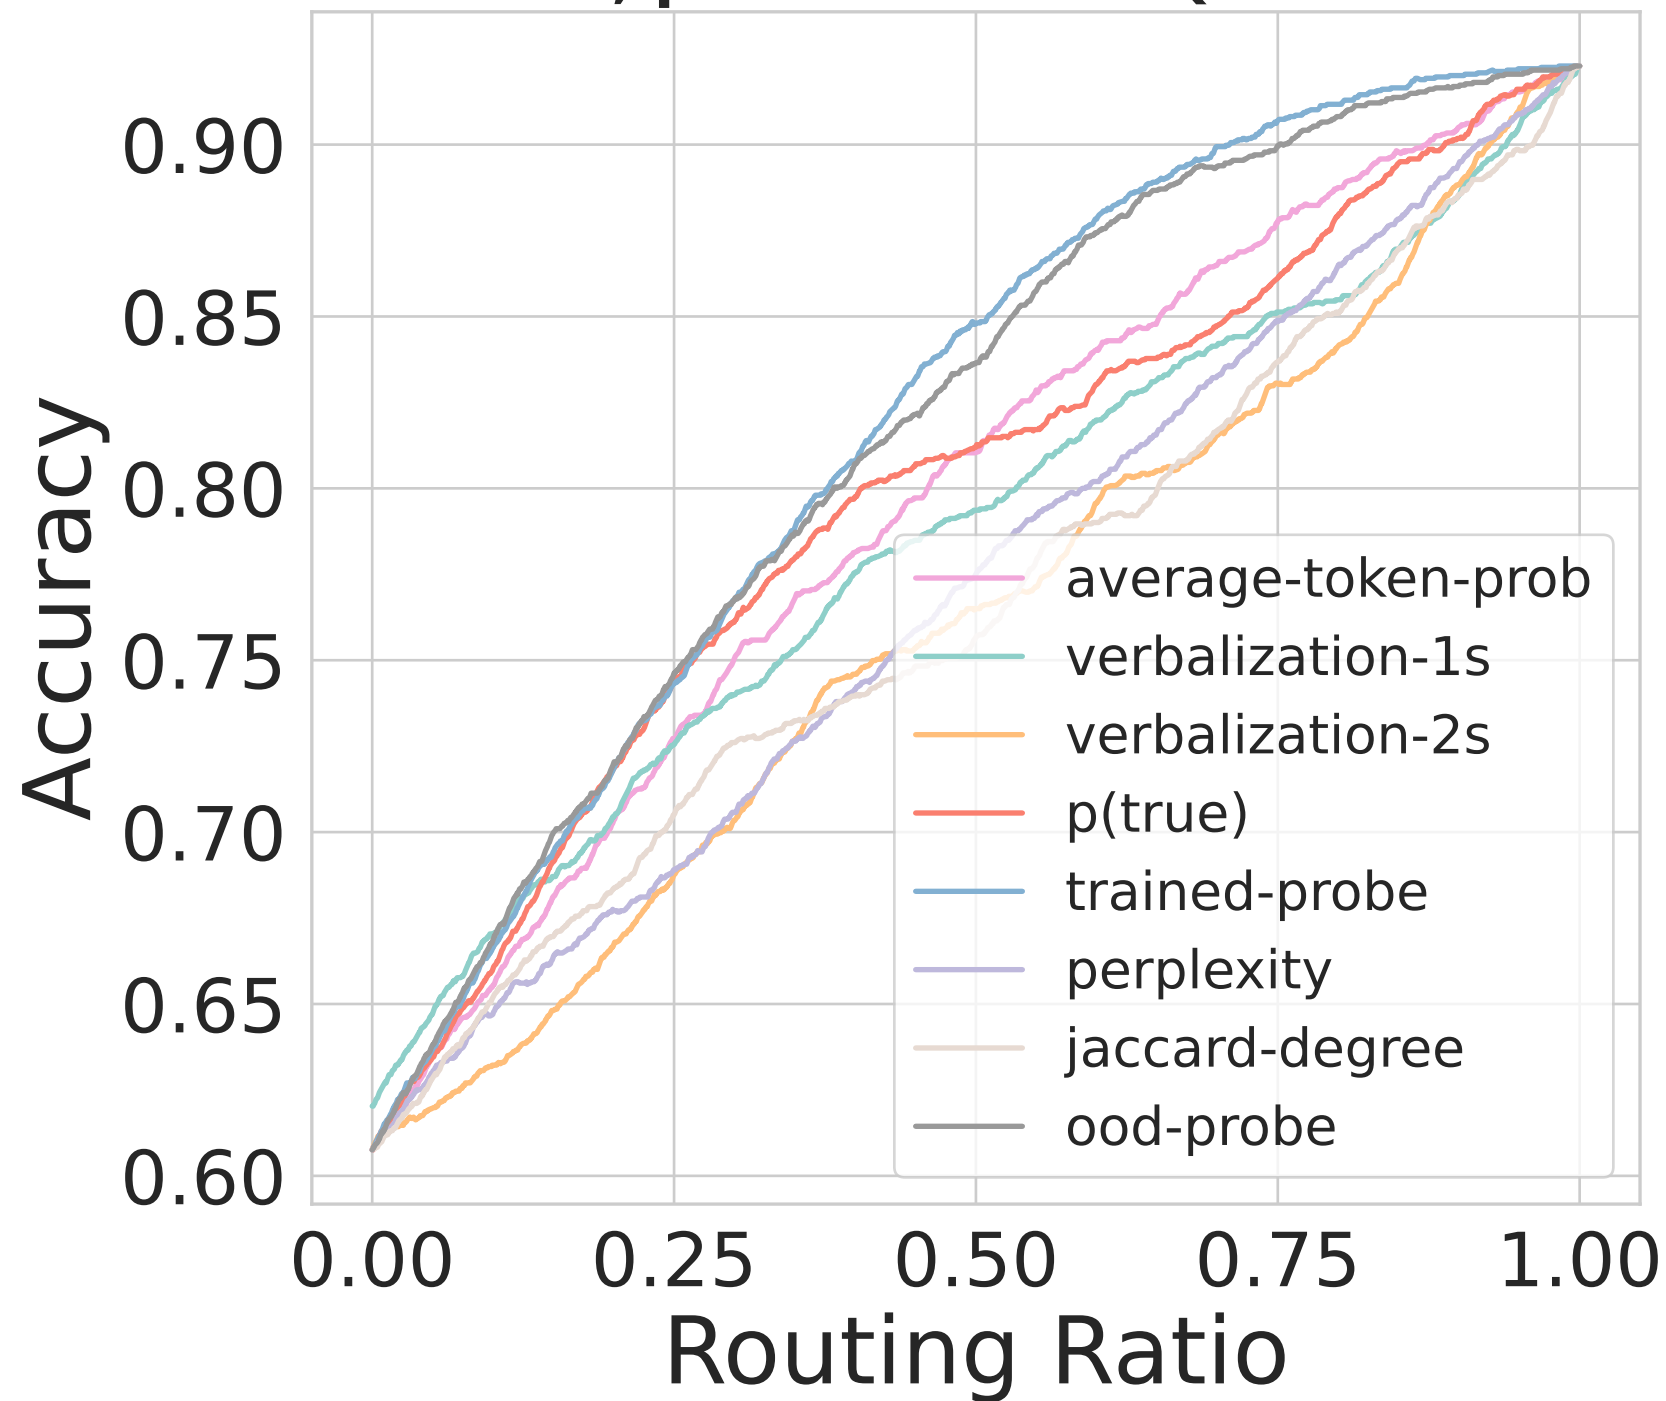

Supplement: supplementary_material [file rr_acc_mmlu_phi-3.5-mini_qwen32.pdf › Routing_SLM_LLMs/Uncertainty-based Routing/w_legend/to_qwen32/rr_acc_mmlu_phi-3.5-mini_qwen32.pdf]

## MMLU, qwen-2.5-7b to Qwen3-32B

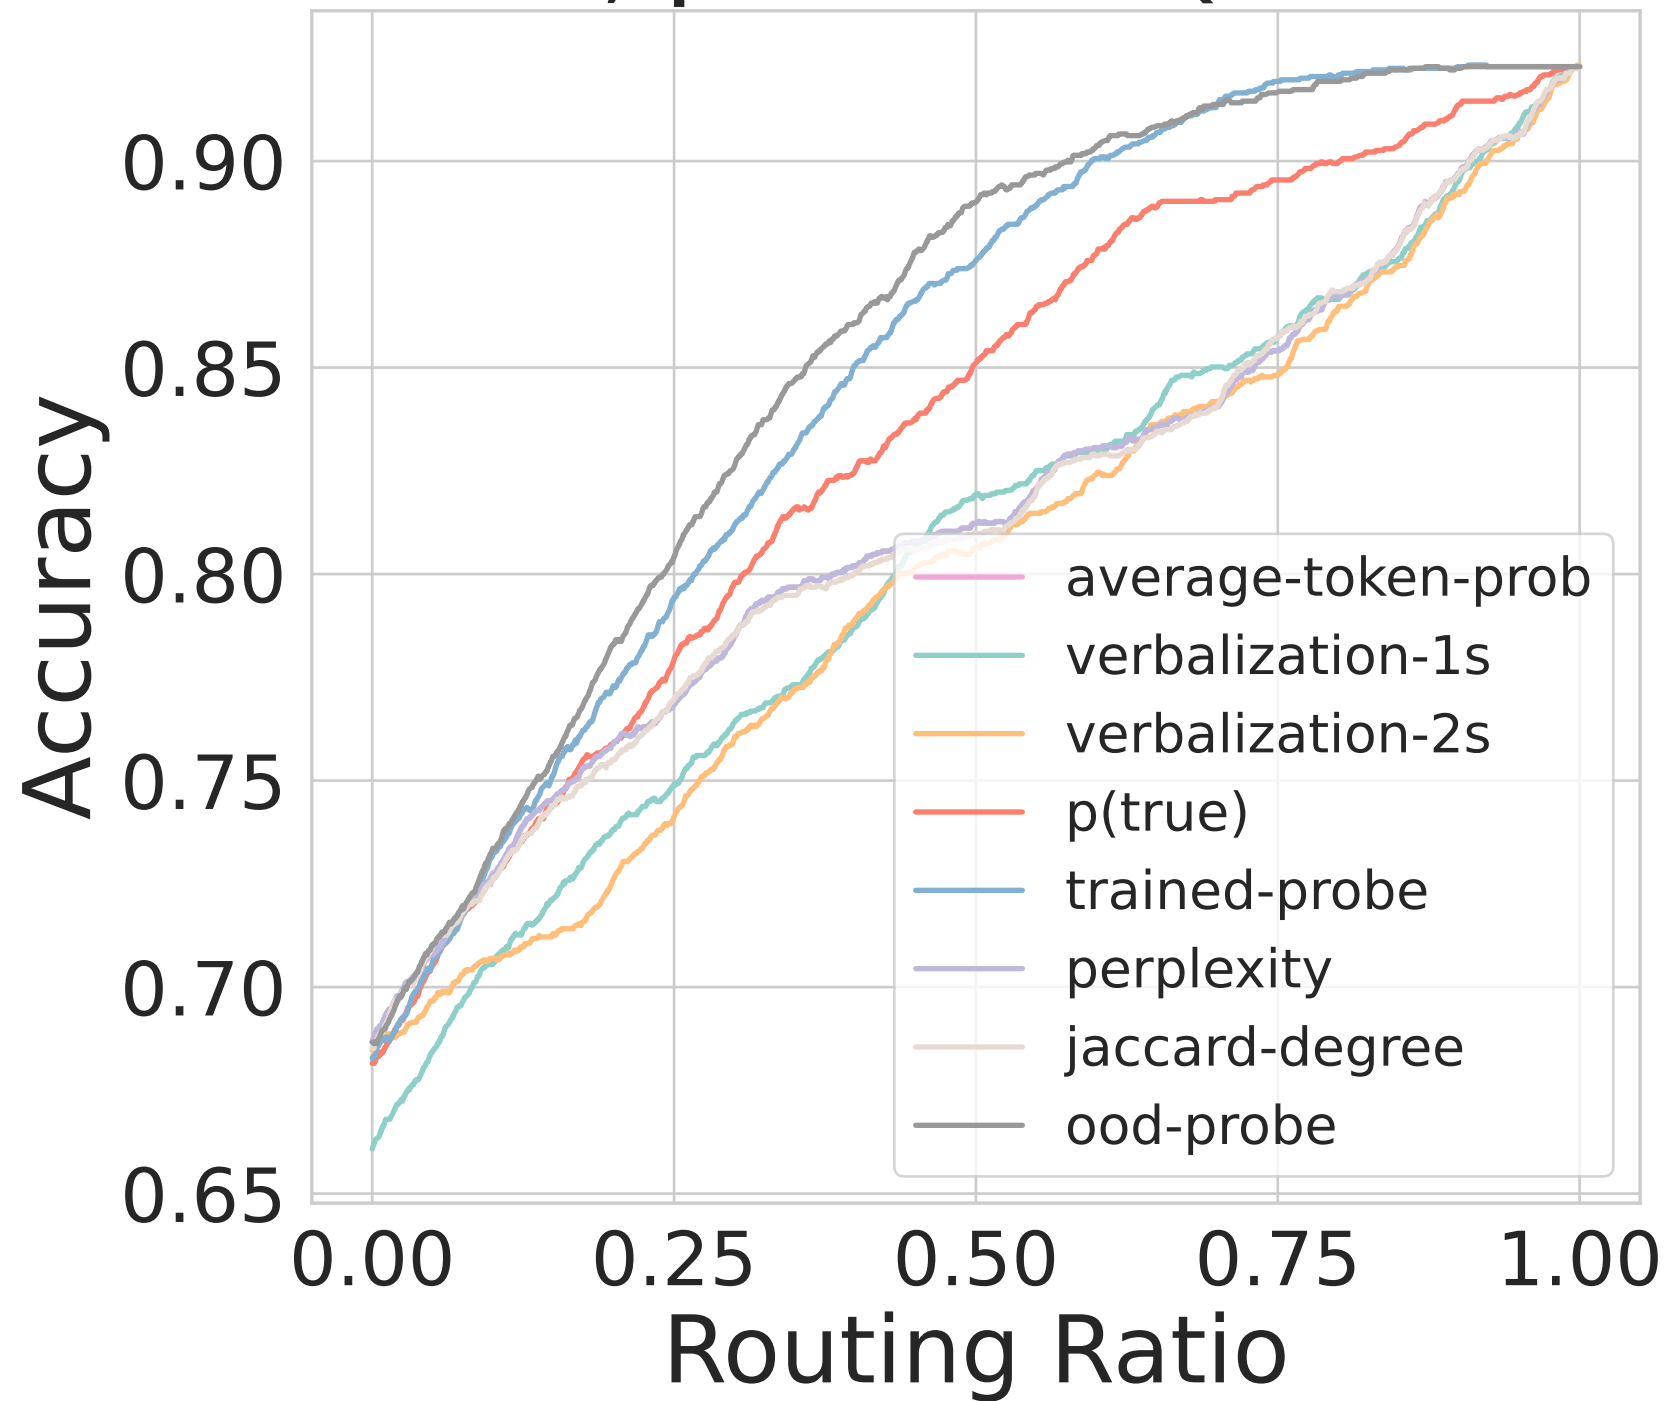

Supplement: supplementary_material [file rr_acc_mmlu_qwen-2.5-7b_qwen32.pdf › Routing_SLM_LLMs/Uncertainty-based Routing/w_legend/to_qwen32/rr_acc_mmlu_qwen-2.5-7b_qwen32.pdf]

# MMLU, rwkv to Qwen3-32B

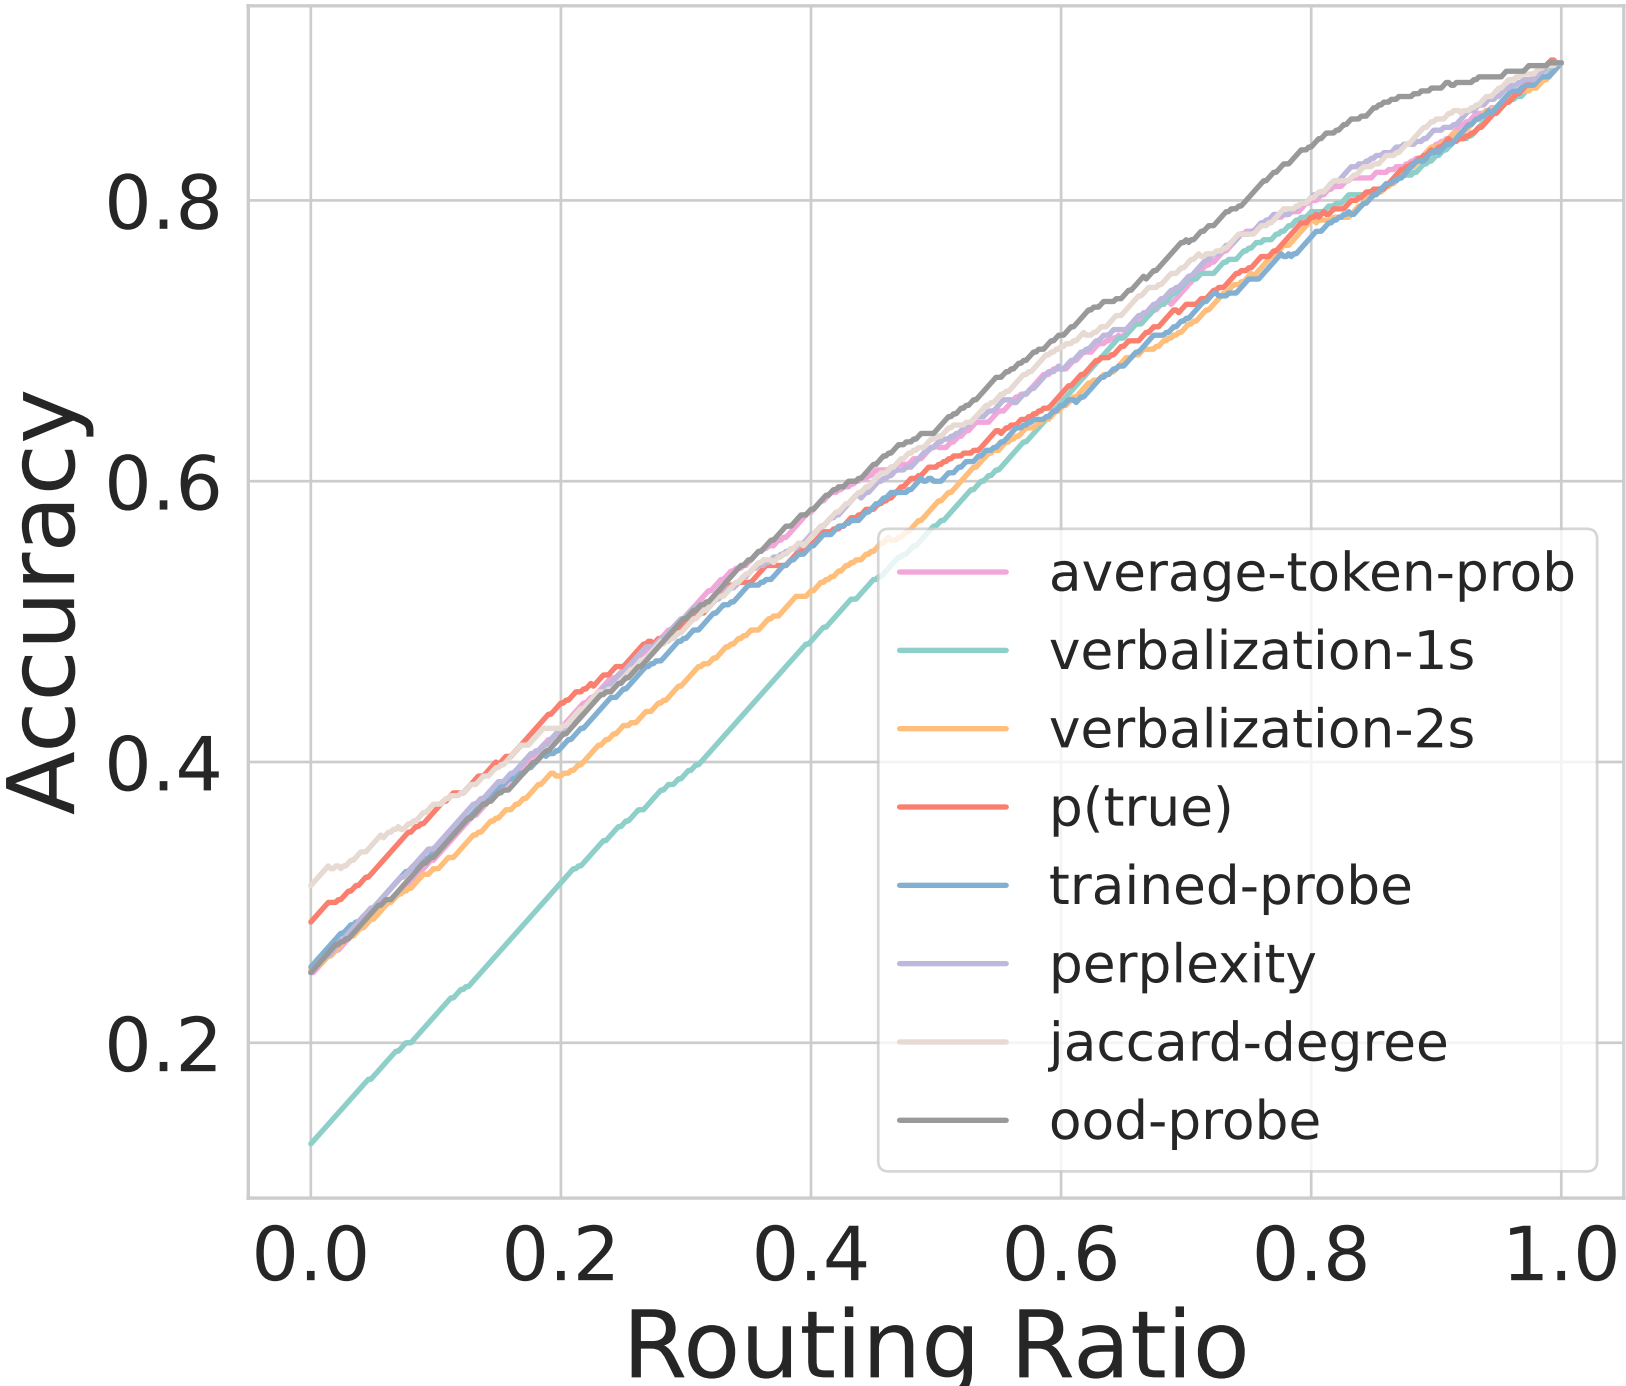

Supplement: supplementary_material [file rr_acc_mmlu_rwkv_qwen32.pdf › Routing_SLM_LLMs/Uncertainty-based Routing/w_legend/to_qwen32/rr_acc_mmlu_rwkv_qwen32.pdf]

## MultiArith, Qwen3-0.6B to Qwen3-32B

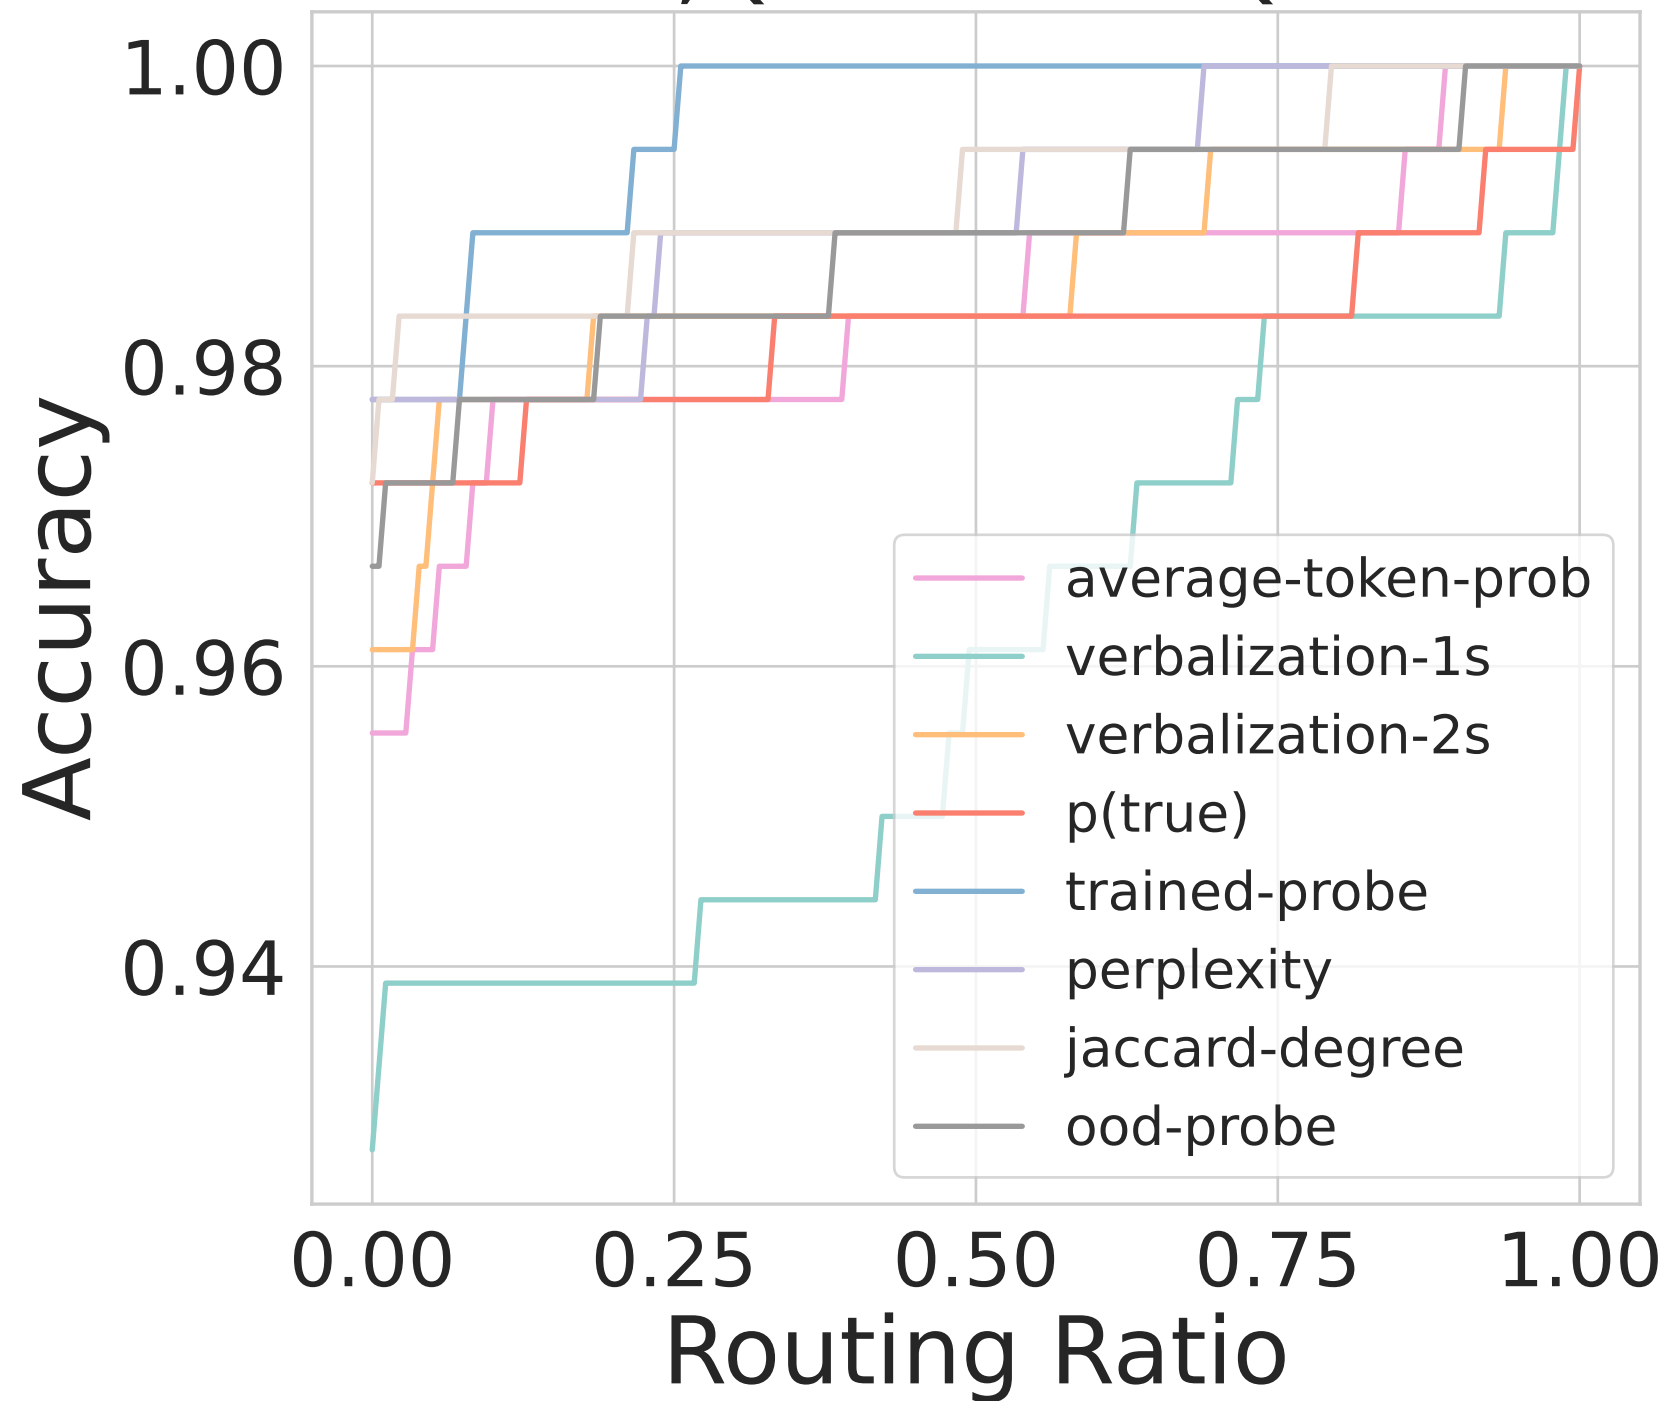

Supplement: supplementary_material [file rr_acc_multiarith_Qwen3-0.6B_qwen32.pdf › Routing_SLM_LLMs/Uncertainty-based Routing/w_legend/to_qwen32/rr_acc_multiarith_Qwen3-0.6B_qwen32.pdf]

## MultiArith, Qwen3-4B to Qwen3-32B

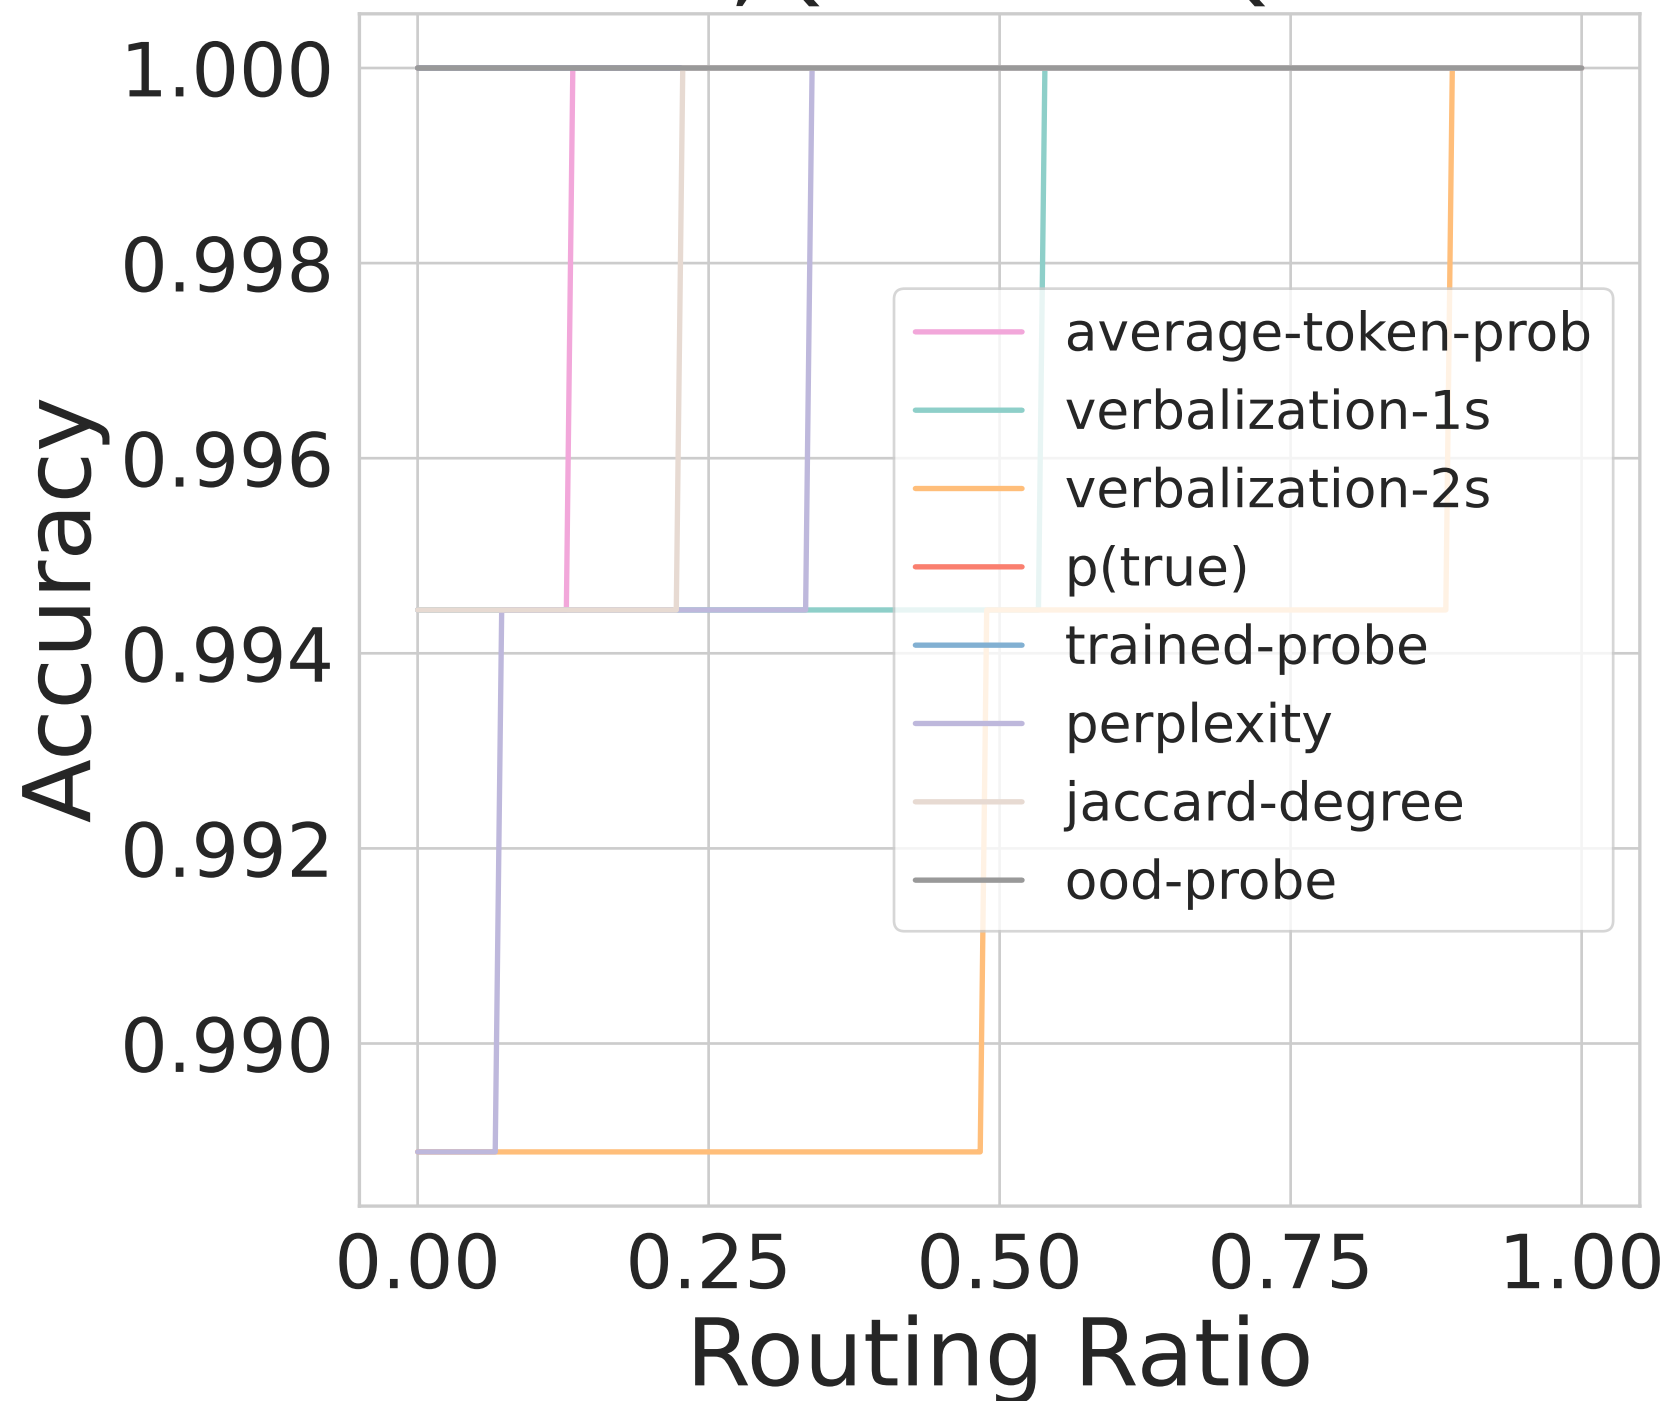

Supplement: supplementary_material [file rr_acc_multiarith_Qwen3-4B_qwen32.pdf › Routing_SLM_LLMs/Uncertainty-based Routing/w_legend/to_qwen32/rr_acc_multiarith_Qwen3-4B_qwen32.pdf]

# MultiArith, granite-3.1-8b to Qwen3-32B

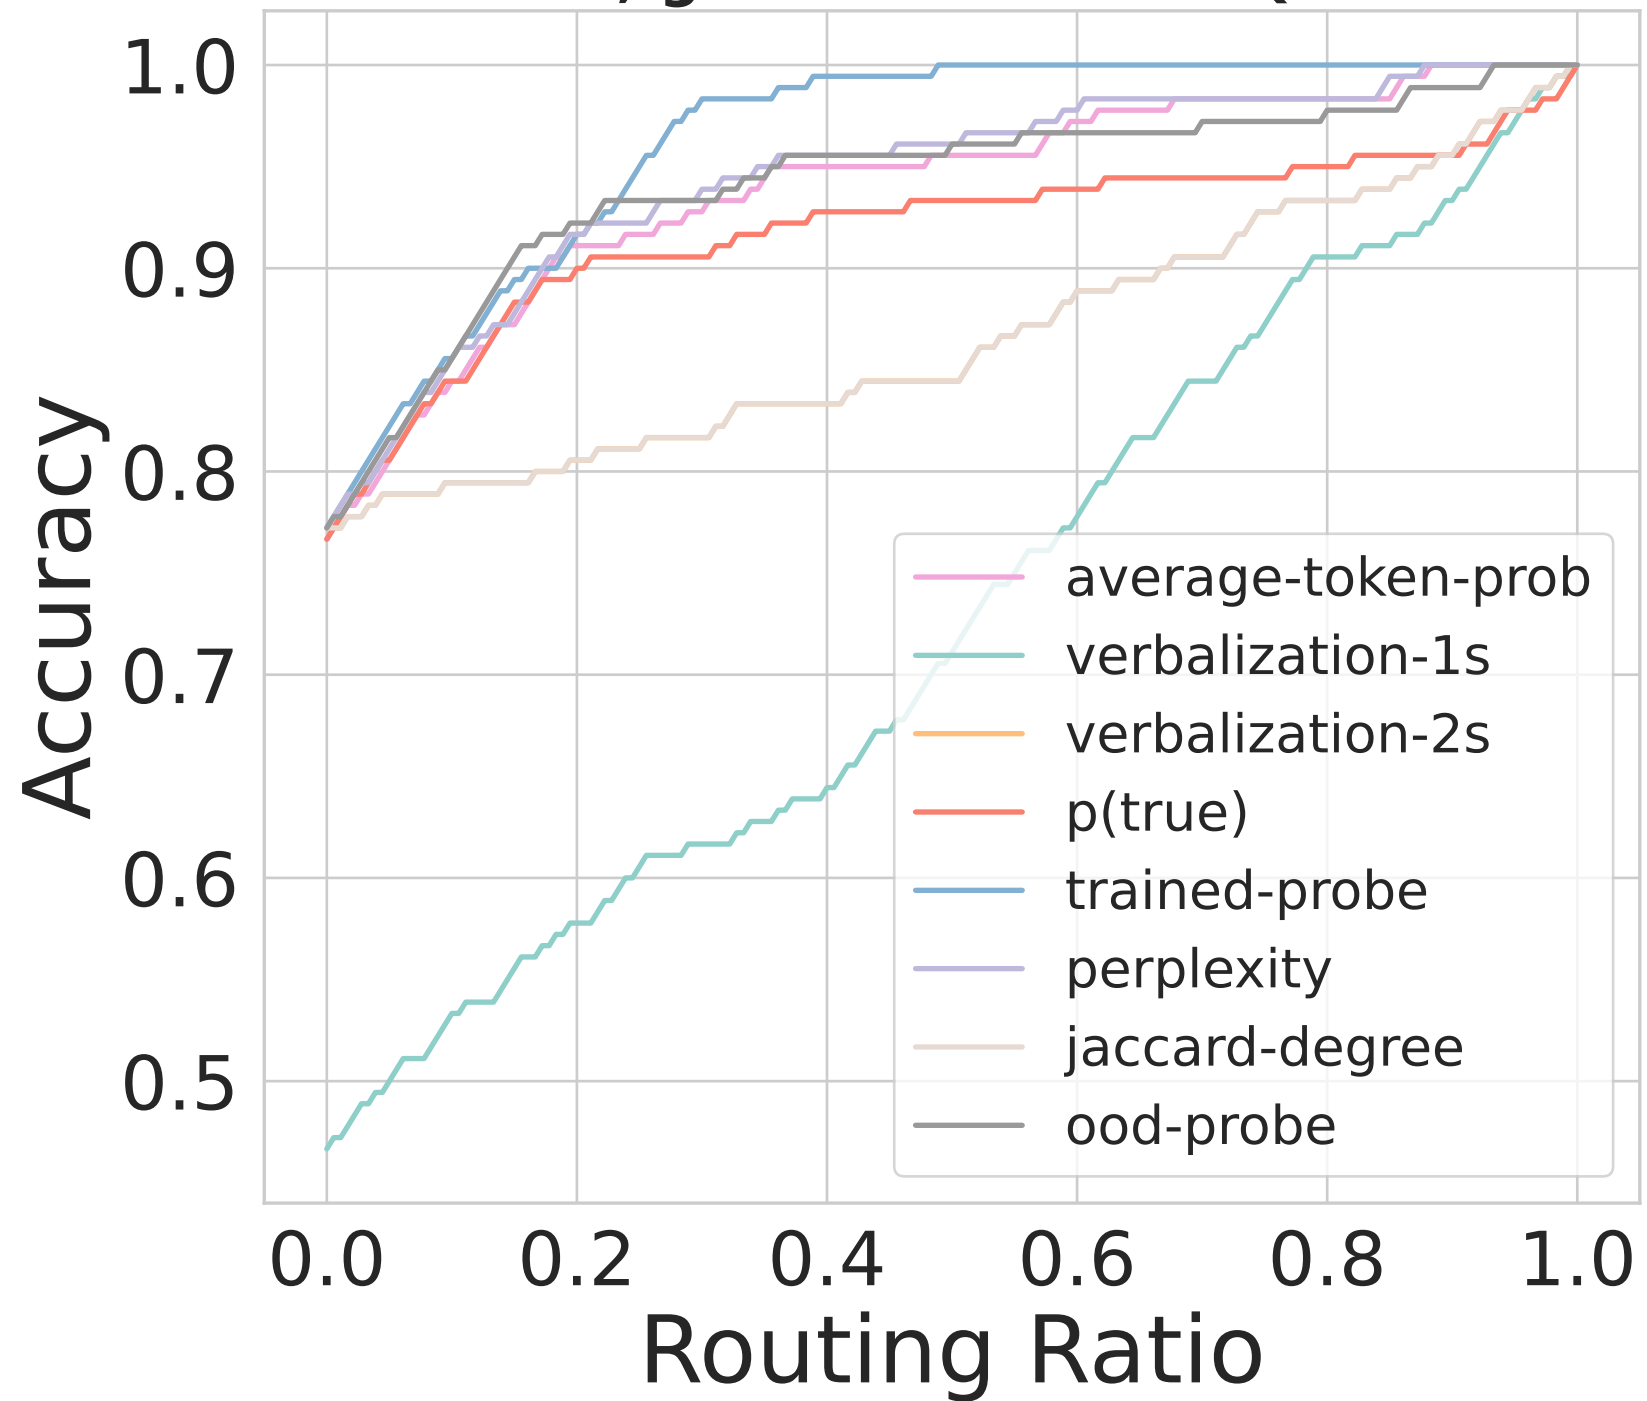

Supplement: supplementary_material [file rr_acc_multiarith_granite-3.1-8b_qwen32.pdf › Routing_SLM_LLMs/Uncertainty-based Routing/w_legend/to_qwen32/rr_acc_multiarith_granite-3.1-8b_qwen32.pdf]

**MultiArith, llama-3.1-8b to Qwen3-32B**

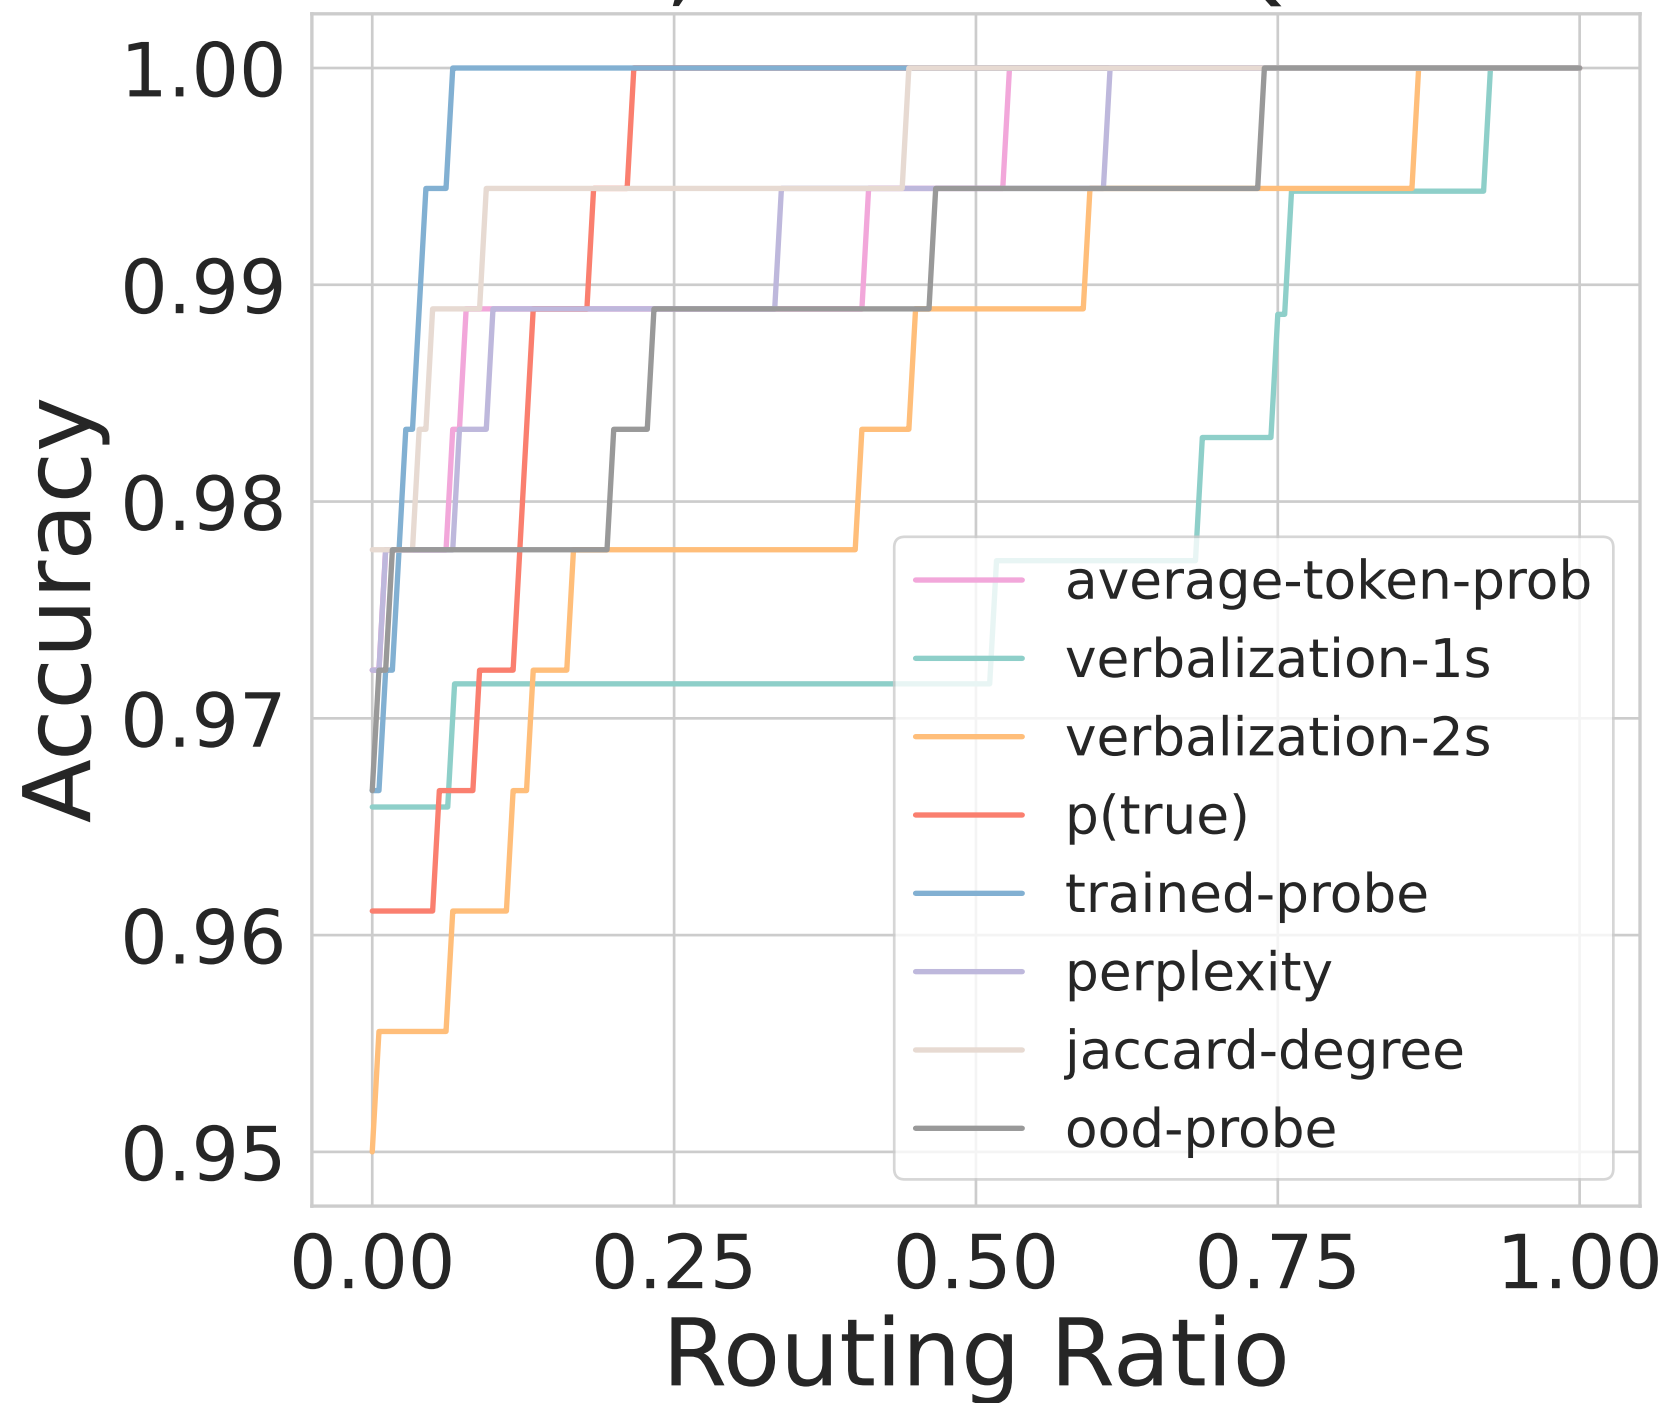

Supplement: supplementary_material [file rr_acc_multiarith_llama-3.1-8b_qwen32.pdf › Routing_SLM_LLMs/Uncertainty-based Routing/w_legend/to_qwen32/rr_acc_multiarith_llama-3.1-8b_qwen32.pdf]

# MultiArith, llama-3.2-1b to Qwen3-32B

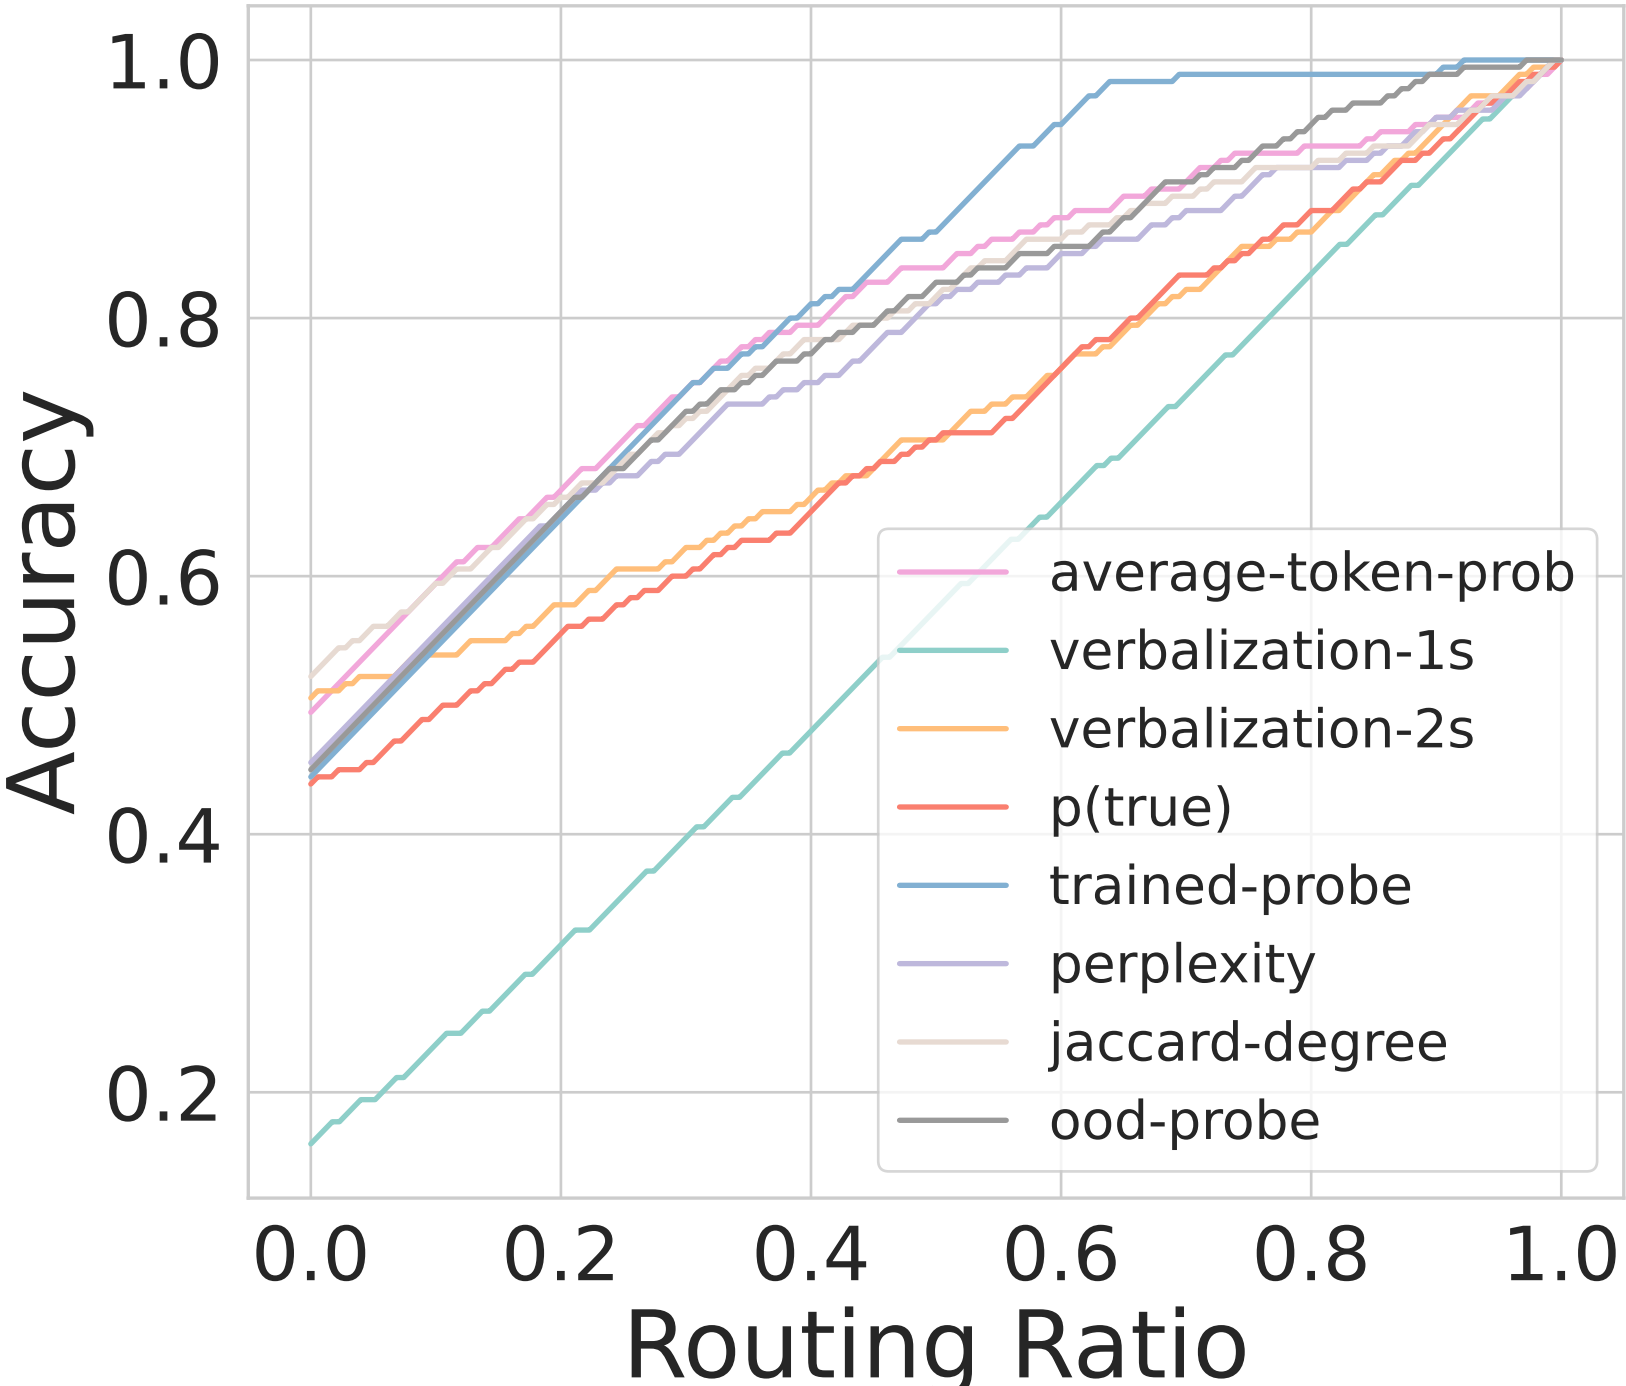

Supplement: supplementary_material [file rr_acc_multiarith_llama-3.2-1b_qwen32.pdf › Routing_SLM_LLMs/Uncertainty-based Routing/w_legend/to_qwen32/rr_acc_multiarith_llama-3.2-1b_qwen32.pdf]

# MultiArith, llama-3.2-3b to Qwen3-32B

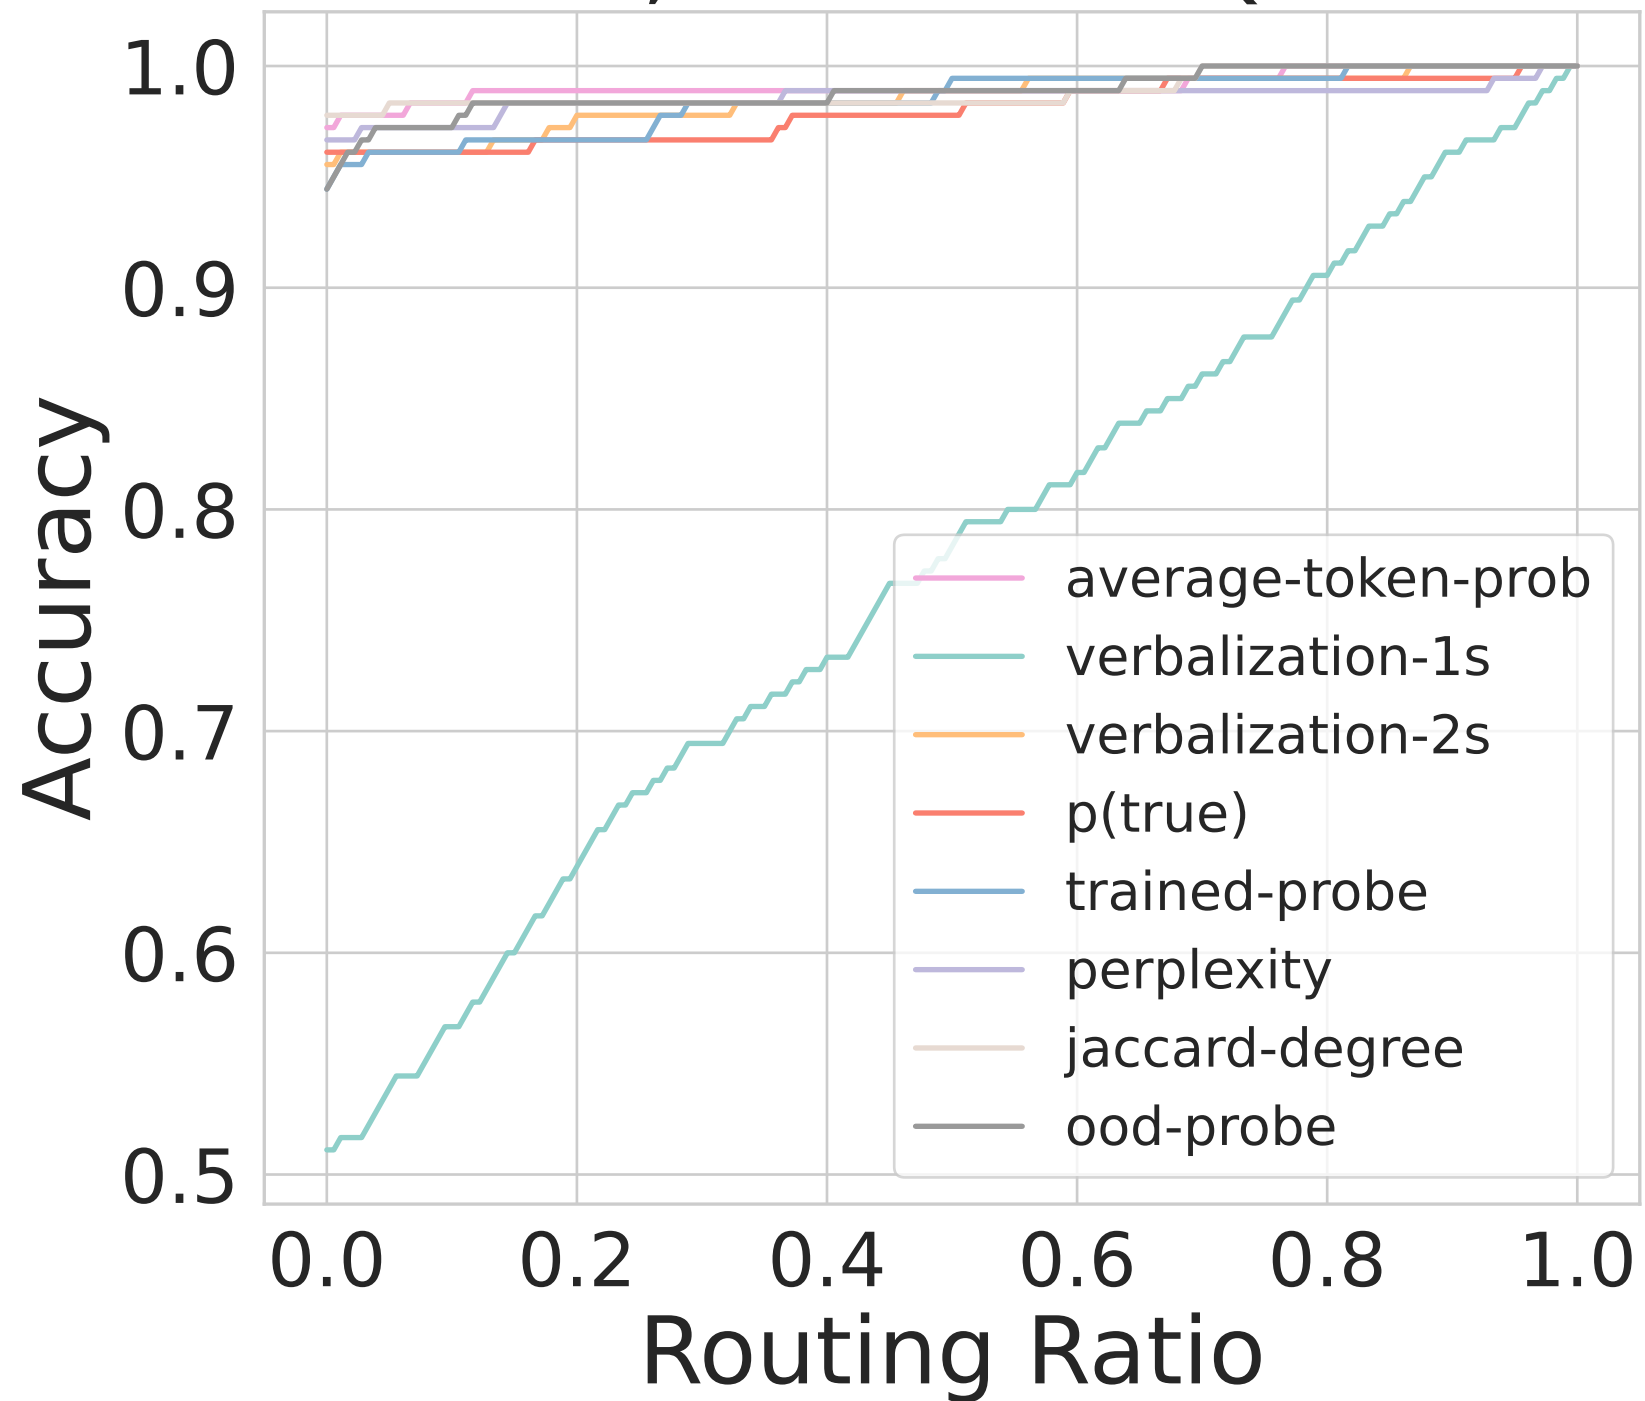

Supplement: supplementary_material [file rr_acc_multiarith_llama-3.2-3b_qwen32.pdf › Routing_SLM_LLMs/Uncertainty-based Routing/w_legend/to_qwen32/rr_acc_multiarith_llama-3.2-3b_qwen32.pdf]

# MultiArith, mistral-7b to Qwen3-32B

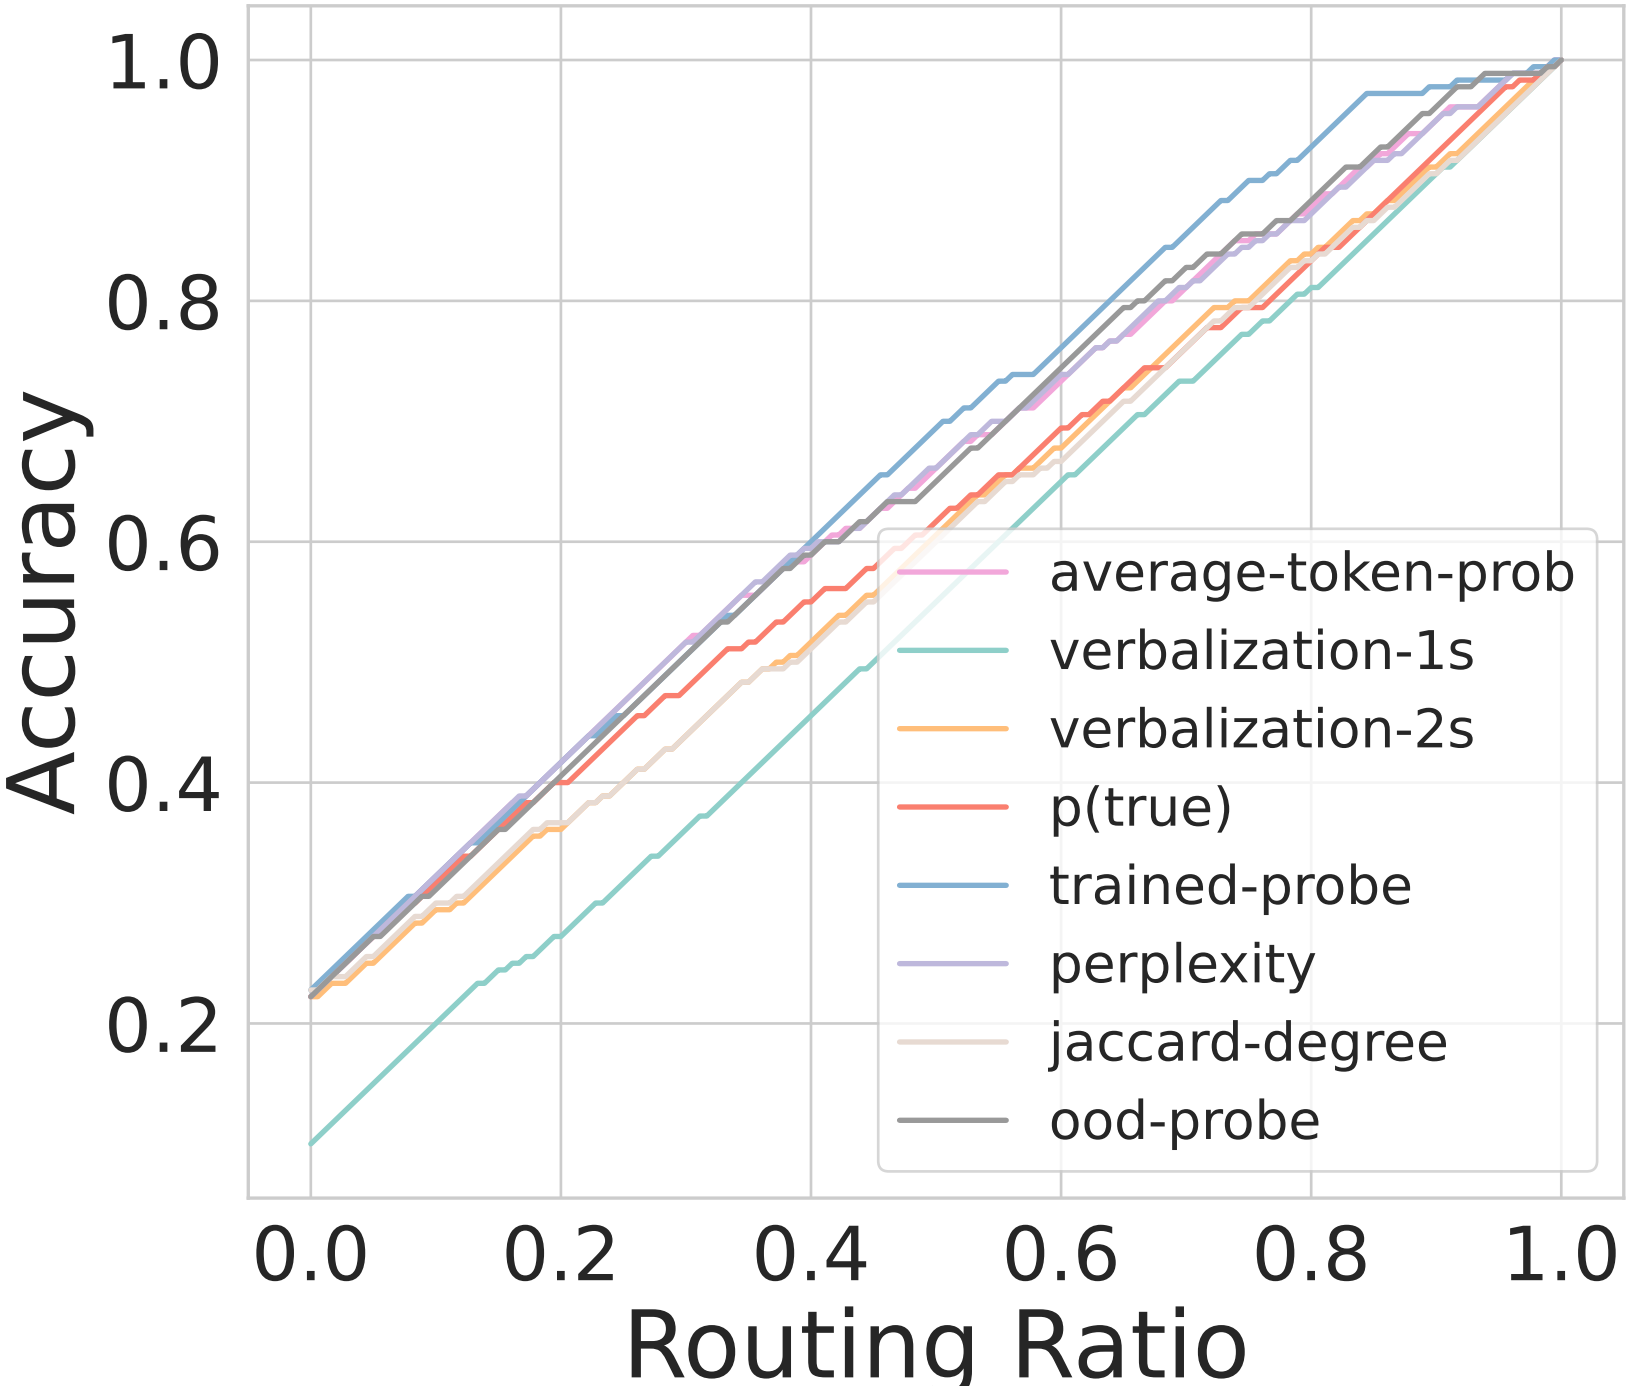

Supplement: supplementary_material [file rr_acc_multiarith_mistral-7b_qwen32.pdf › Routing_SLM_LLMs/Uncertainty-based Routing/w_legend/to_qwen32/rr_acc_multiarith_mistral-7b_qwen32.pdf]

# MultiArith, phi-3.5-mini to Qwen3-32B

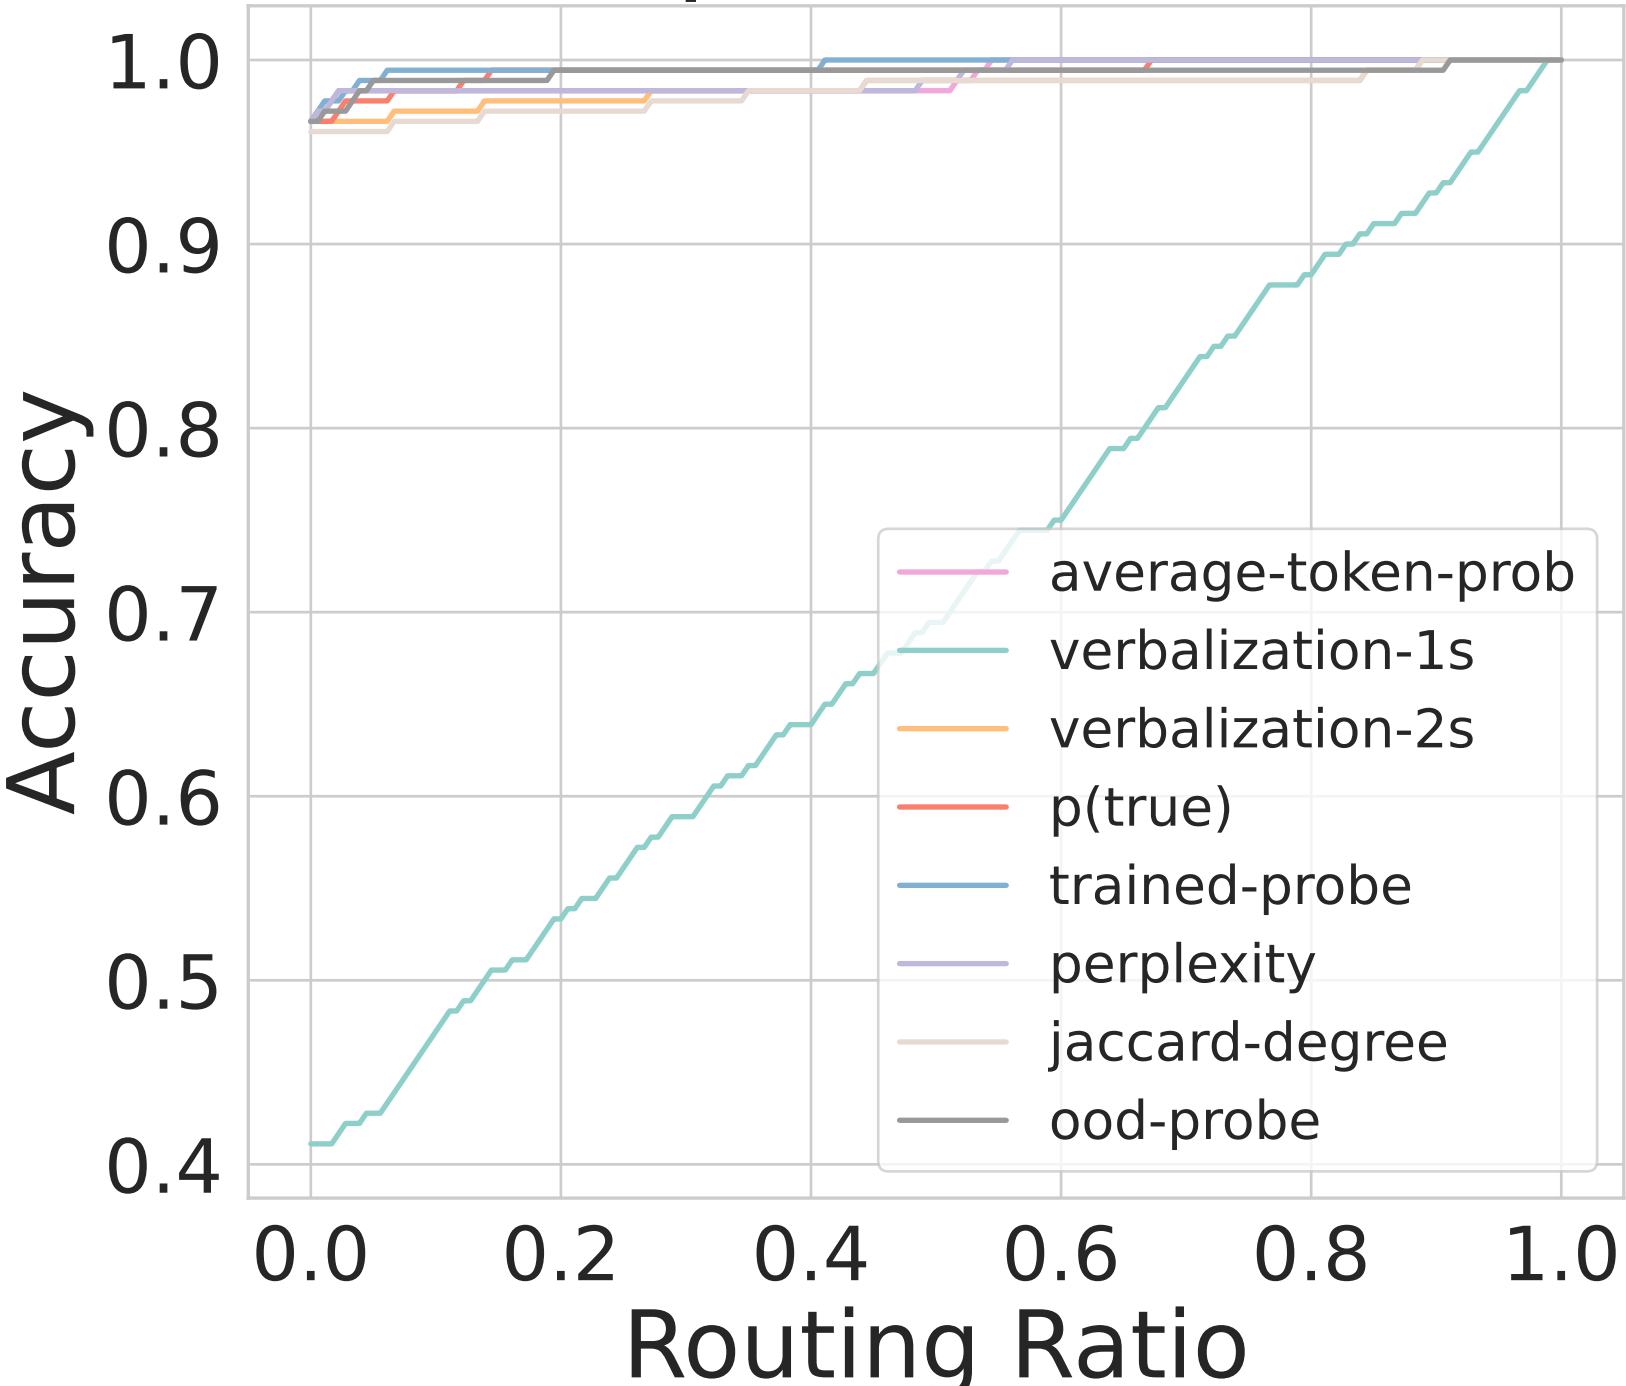

Supplement: supplementary_material [file rr_acc_multiarith_phi-3.5-mini_qwen32.pdf › Routing_SLM_LLMs/Uncertainty-based Routing/w_legend/to_qwen32/rr_acc_multiarith_phi-3.5-mini_qwen32.pdf]

MultiArith, phi-4-mini-reasoning to Qwen3-32B

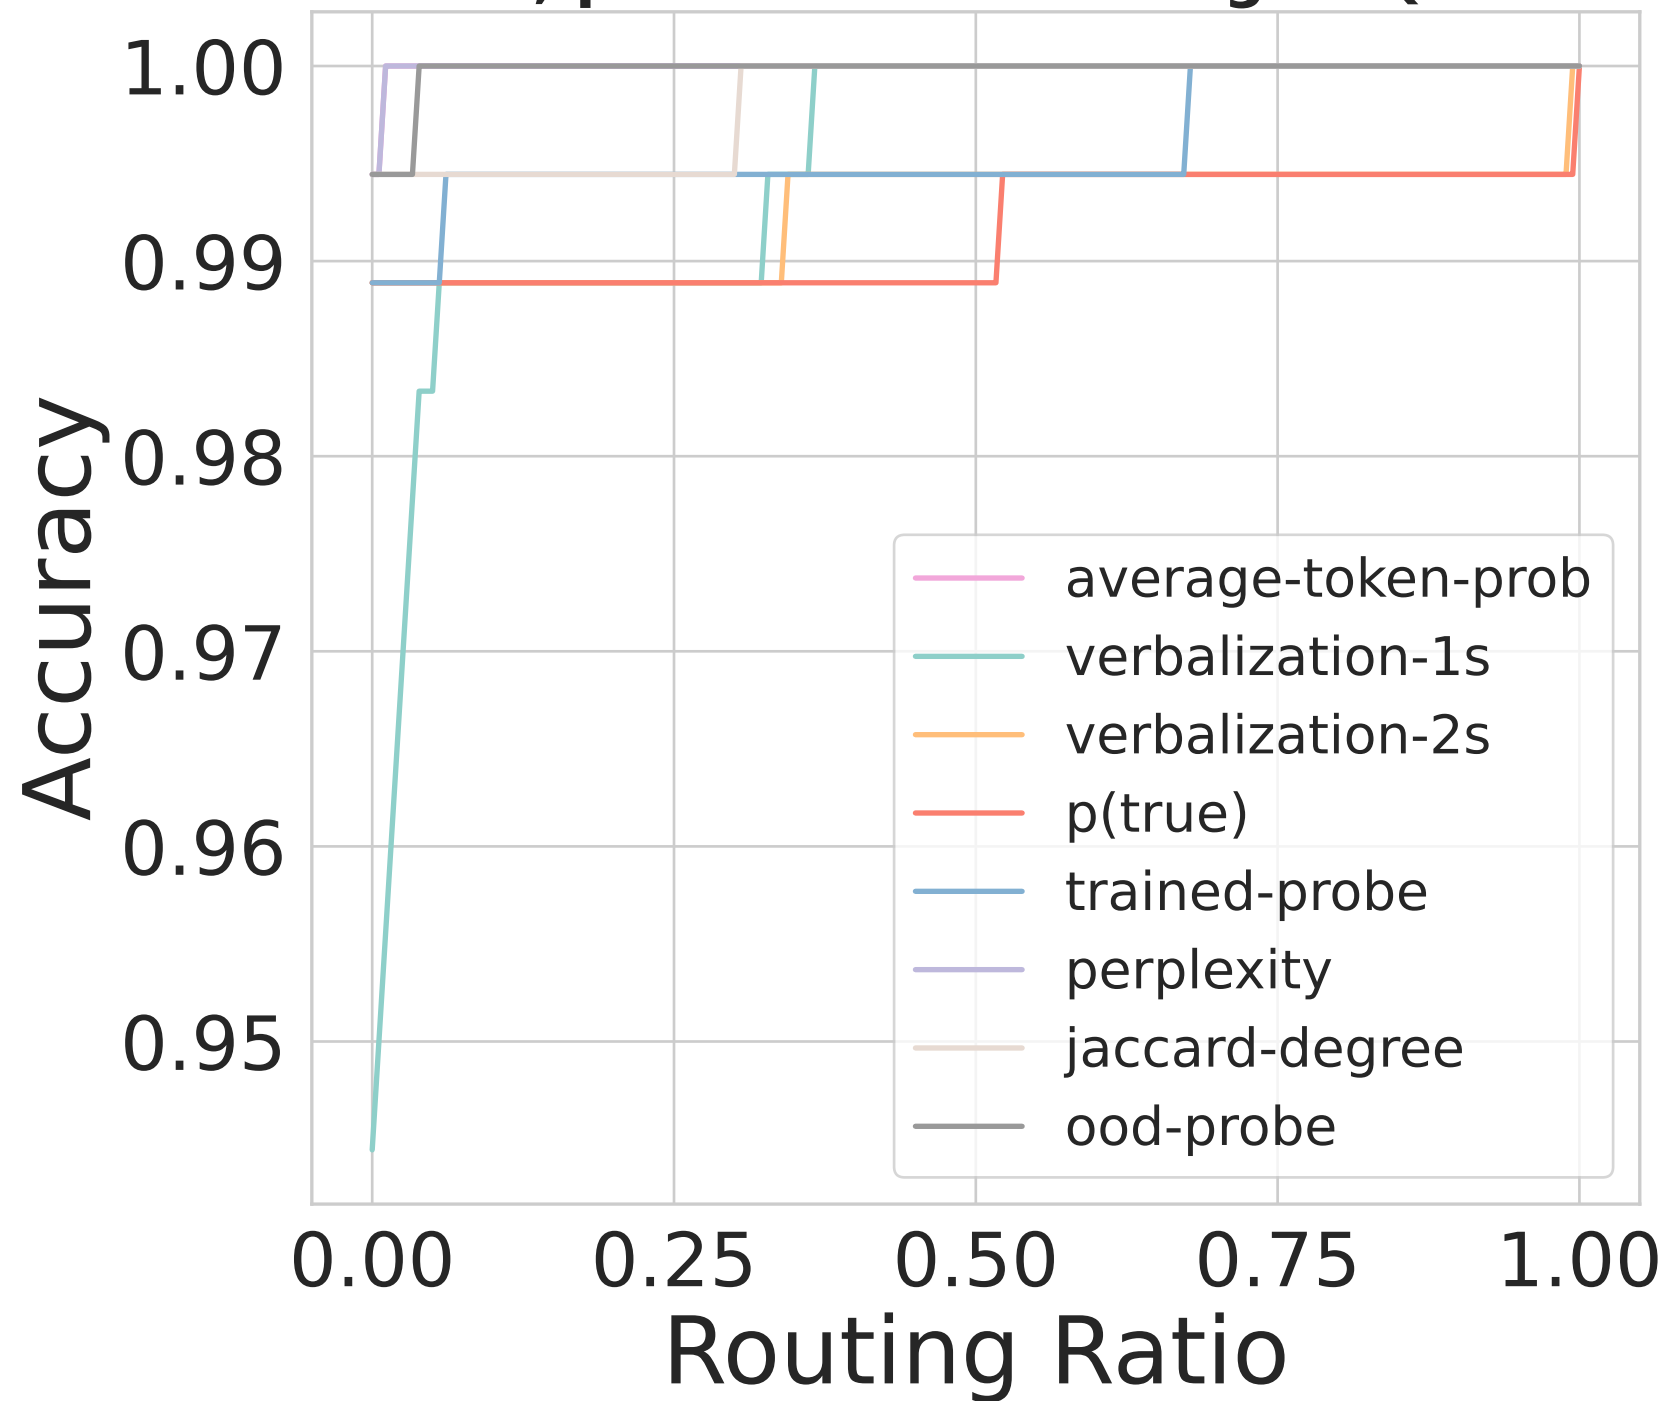

Supplement: supplementary_material [file rr_acc_multiarith_phi-4-mini-reasoning_qwen32.pdf › Routing_SLM_LLMs/Uncertainty-based Routing/w_legend/to_qwen32/rr_acc_multiarith_phi-4-mini-reasoning_qwen32.pdf]

# MultiArith, qwen-2.5-7b to Qwen3-32B

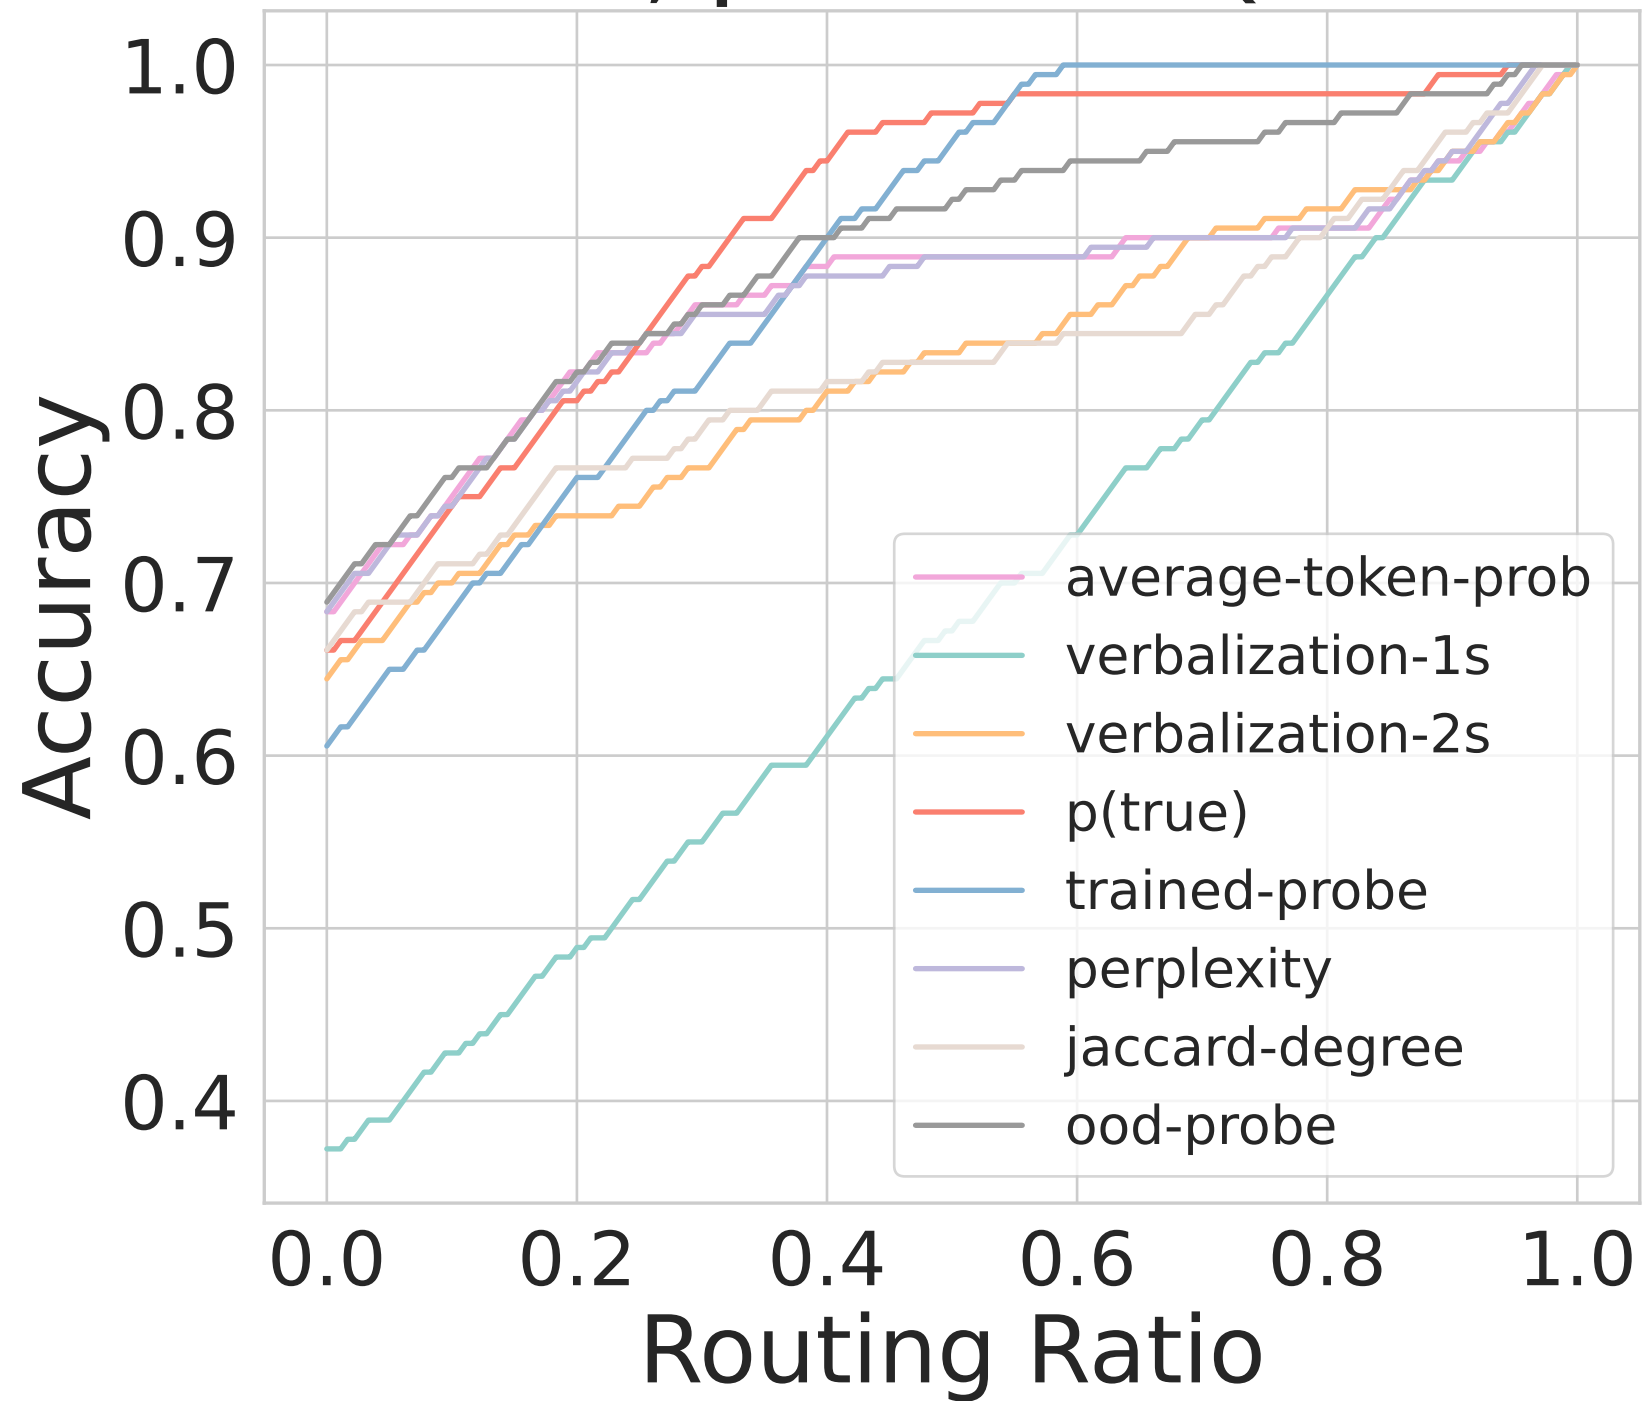

Supplement: supplementary_material [file rr_acc_multiarith_qwen-2.5-7b_qwen32.pdf › Routing_SLM_LLMs/Uncertainty-based Routing/w_legend/to_qwen32/rr_acc_multiarith_qwen-2.5-7b_qwen32.pdf]

# MultiArith, rwkv to Qwen3-32B

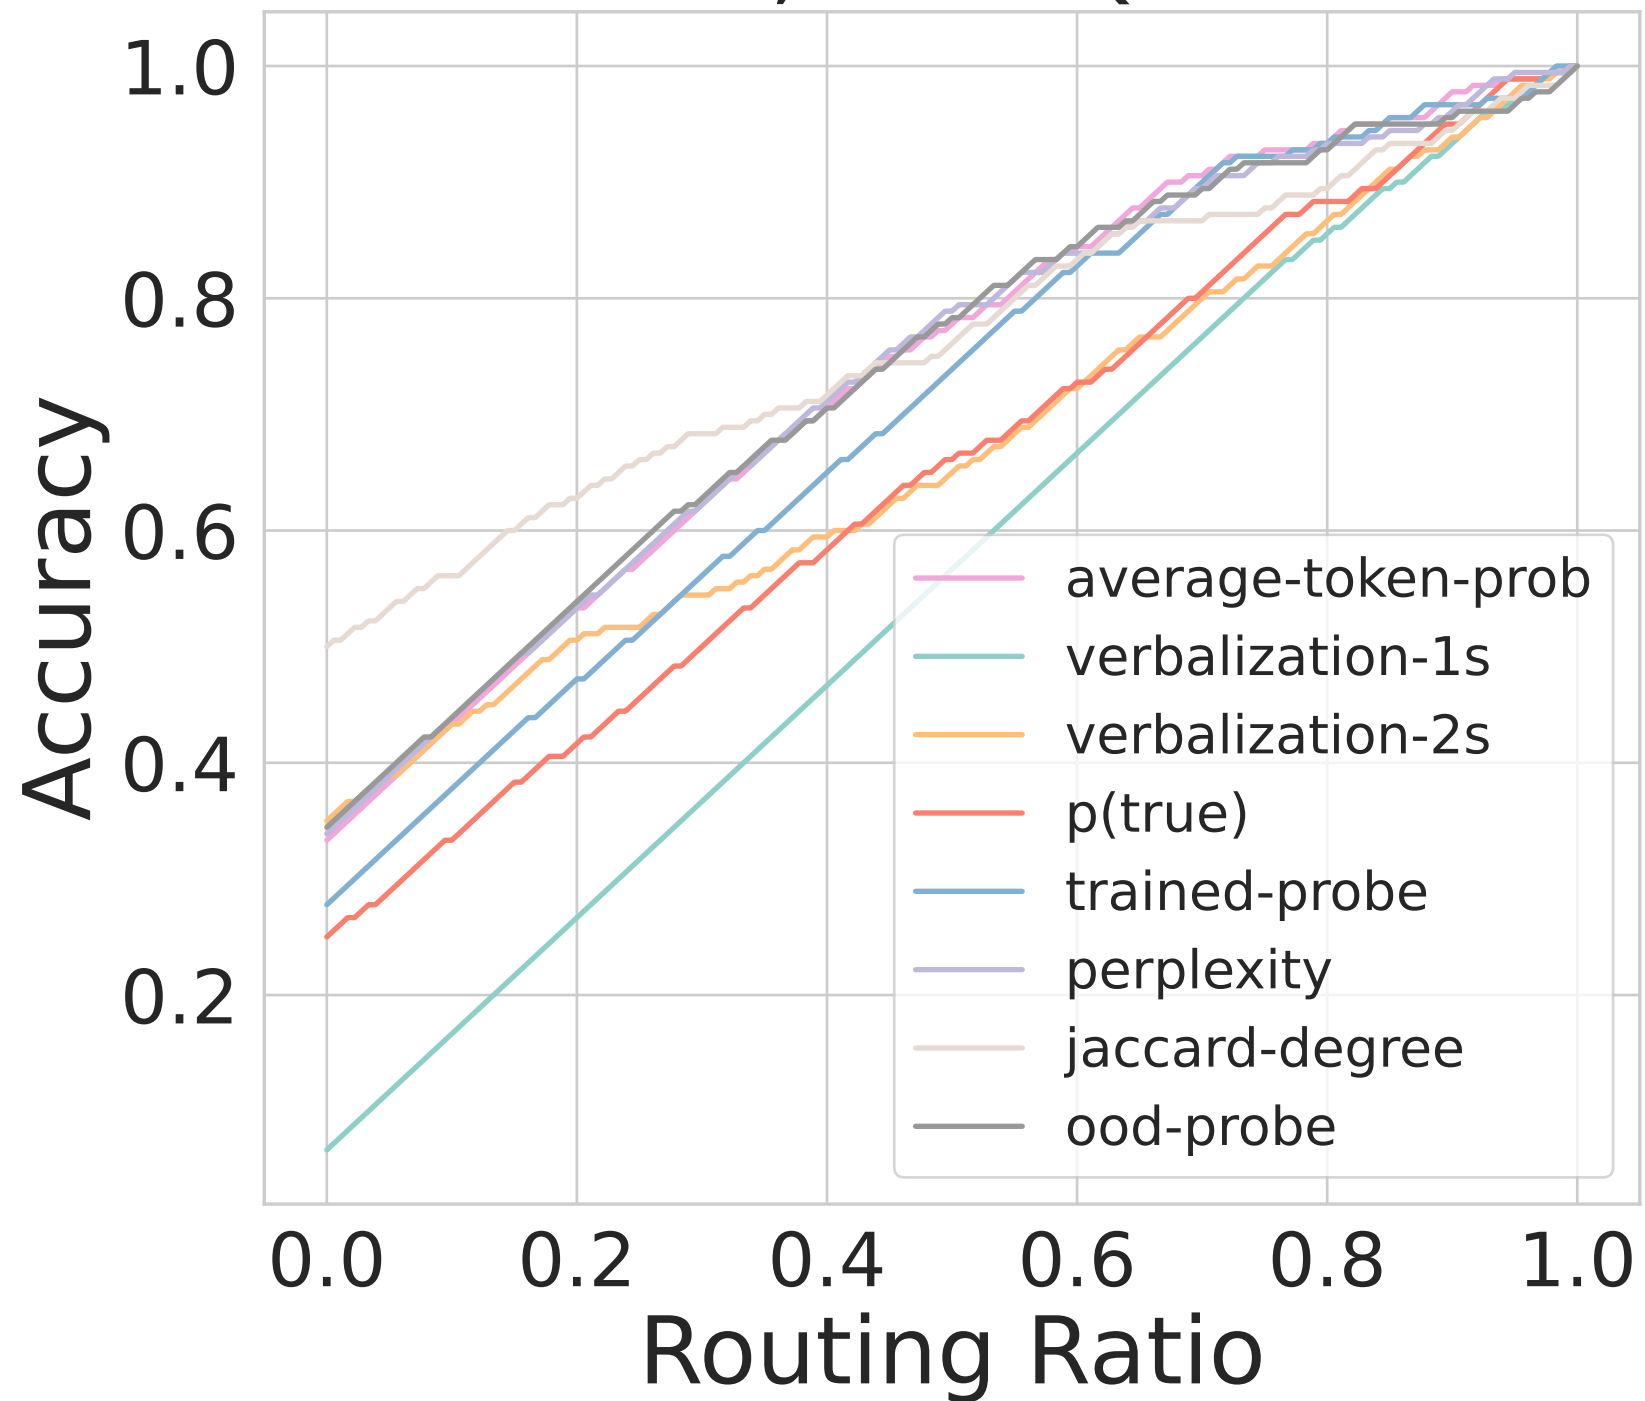

Supplement: supplementary_material [file rr_acc_multiarith_rwkv_qwen32.pdf › Routing_SLM_LLMs/Uncertainty-based Routing/w_legend/to_qwen32/rr_acc_multiarith_rwkv_qwen32.pdf]

# OpenBookQA, Qwen3-0.6B to Qwen3-32B

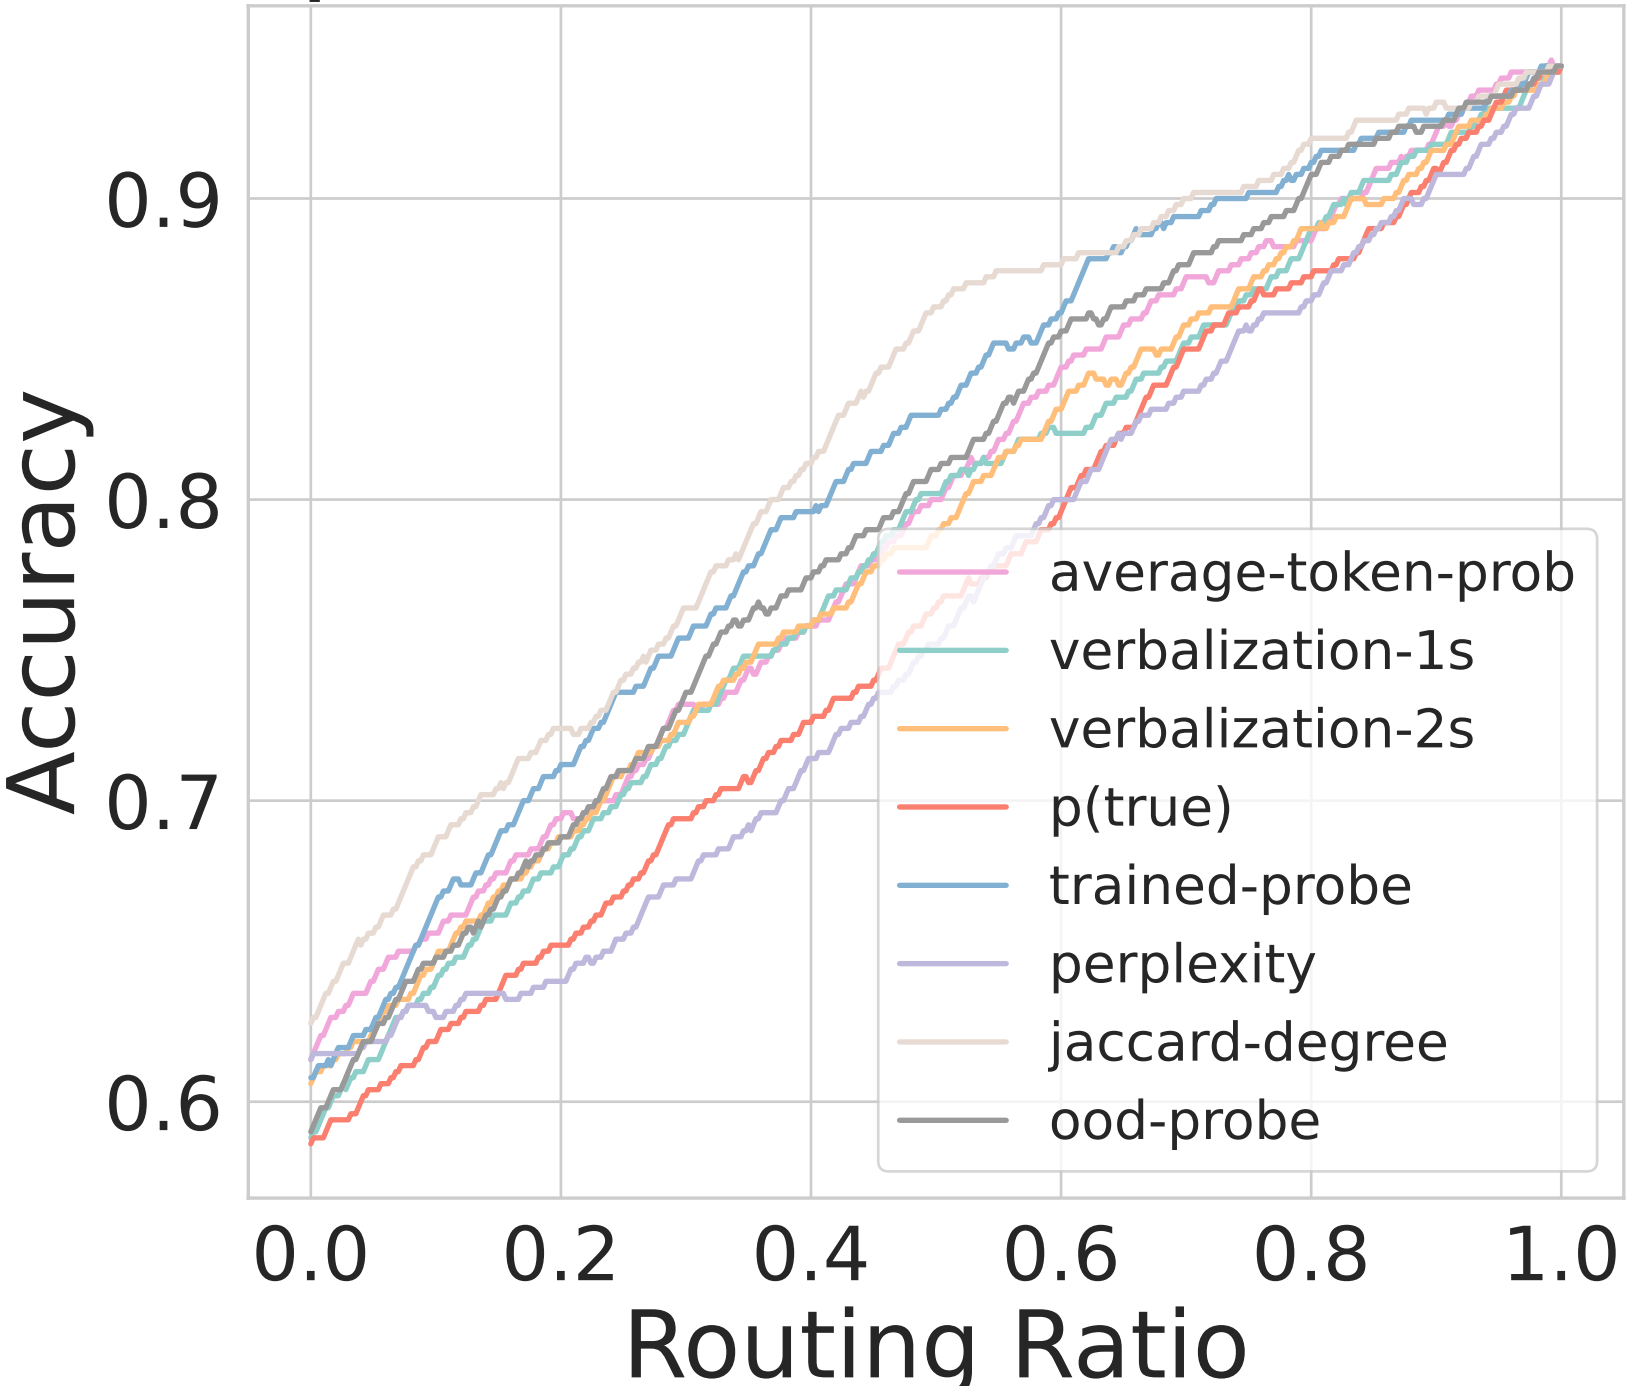

Supplement: supplementary_material [file rr_acc_openbook_qa_Qwen3-0.6B_qwen32.pdf › Routing_SLM_LLMs/Uncertainty-based Routing/w_legend/to_qwen32/rr_acc_openbook_qa_Qwen3-0.6B_qwen32.pdf]

# OpenBookQA, Qwen3-1.7B to Qwen3-32B

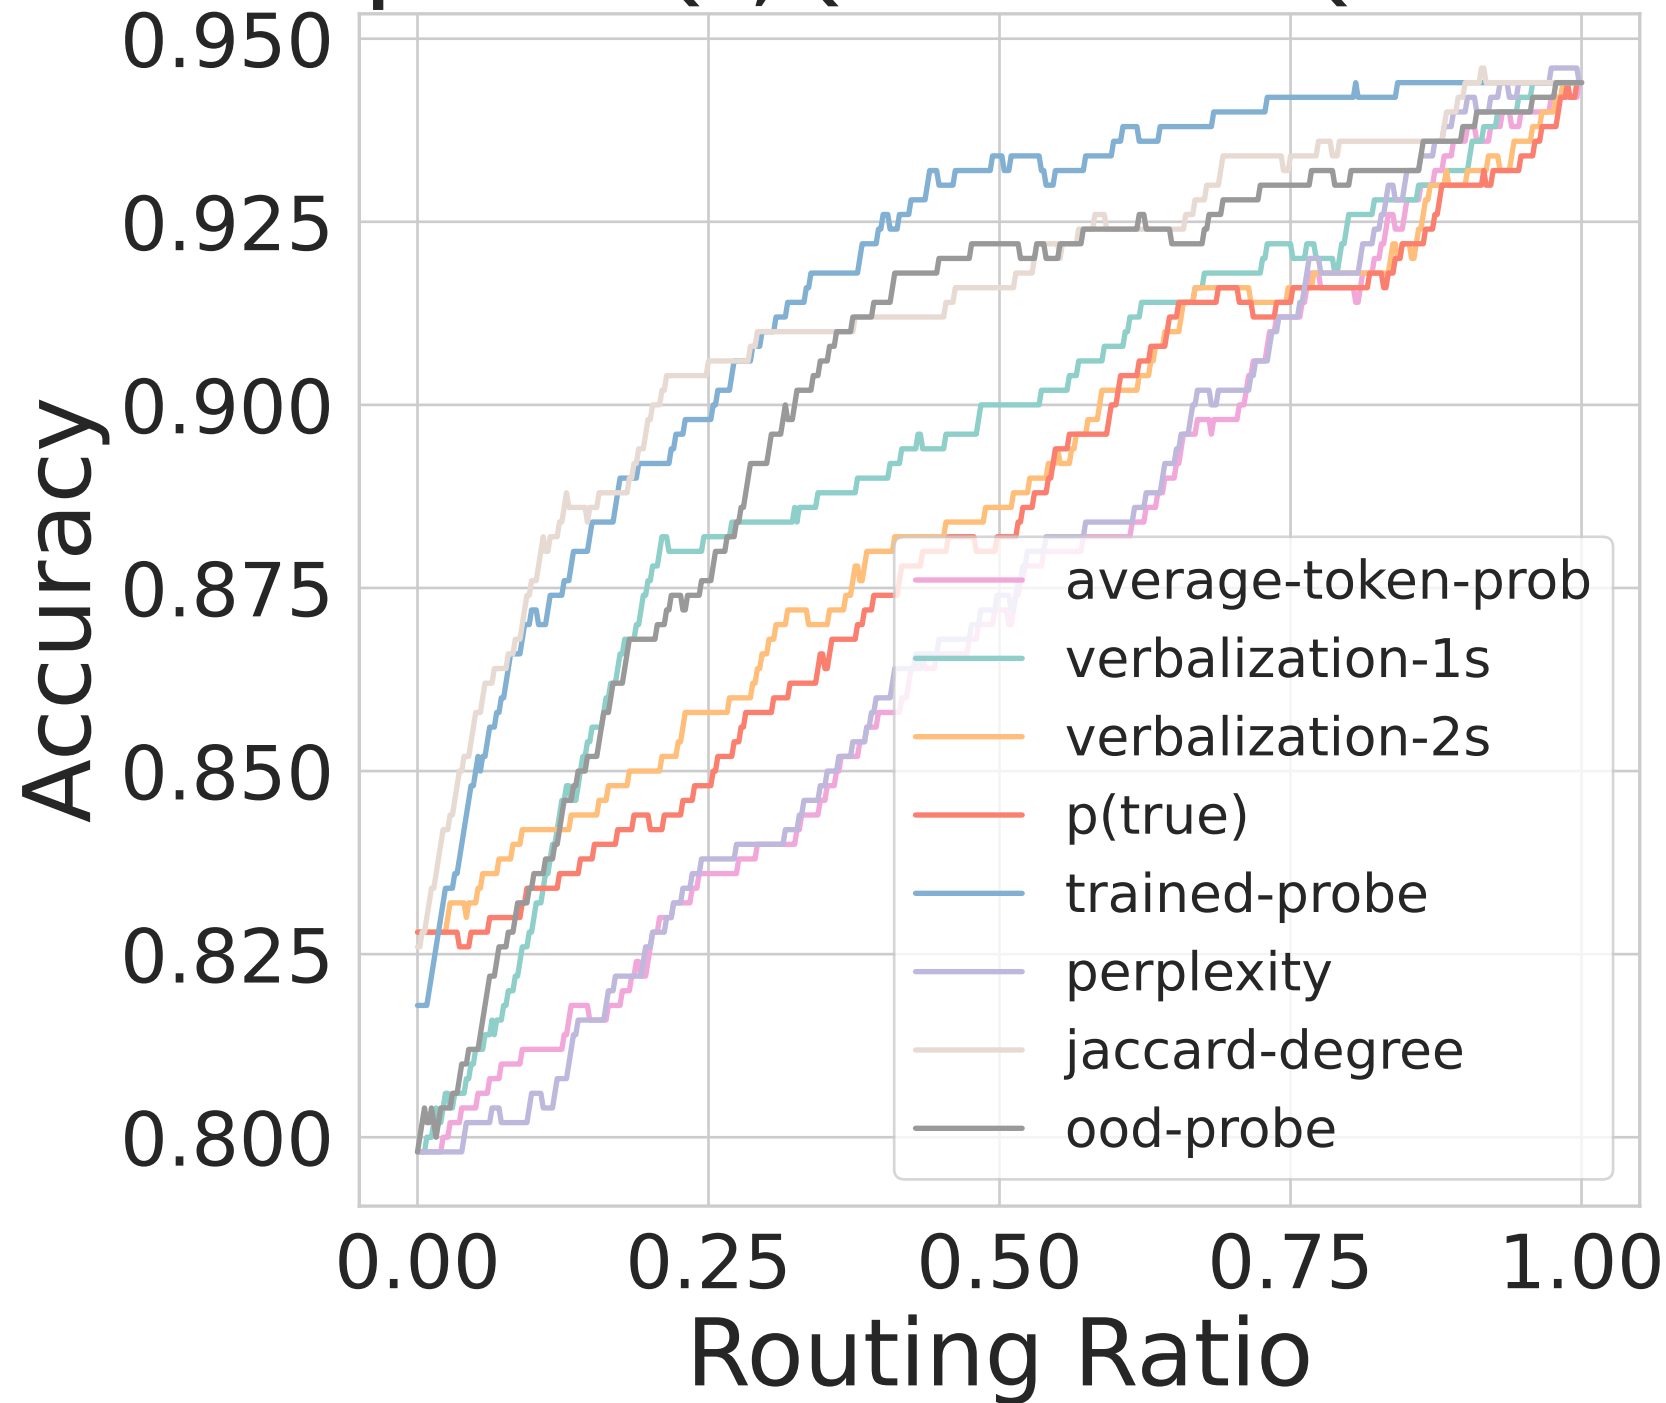

Supplement: supplementary_material [file rr_acc_openbook_qa_Qwen3-1.7B_qwen32.pdf › Routing_SLM_LLMs/Uncertainty-based Routing/w_legend/to_qwen32/rr_acc_openbook_qa_Qwen3-1.7B_qwen32.pdf]

OpenBookQA, Qwen3-4B to Qwen3-32B

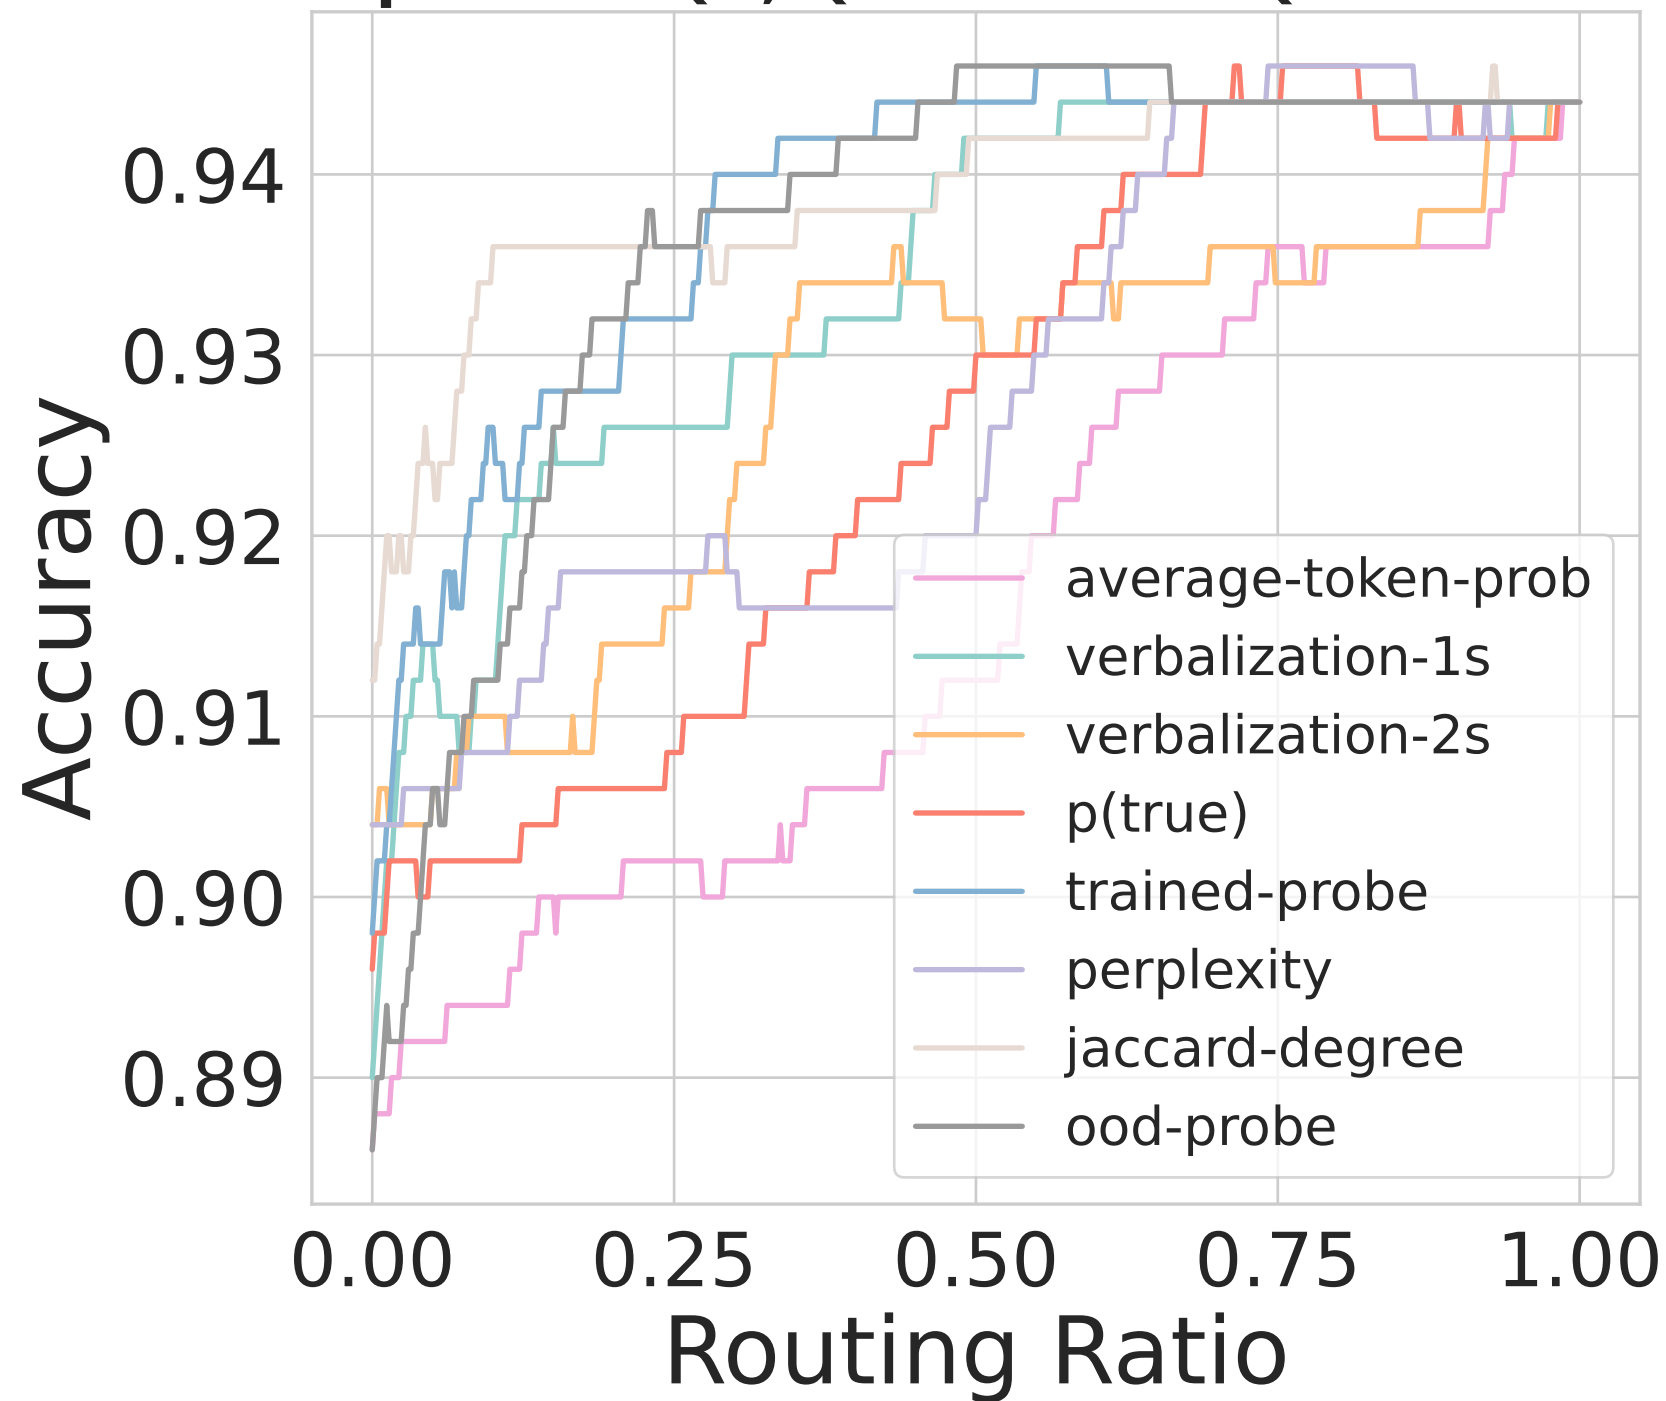

Supplement: supplementary_material [file rr_acc_openbook_qa_Qwen3-4B_qwen32.pdf › Routing_SLM_LLMs/Uncertainty-based Routing/w_legend/to_qwen32/rr_acc_openbook_qa_Qwen3-4B_qwen32.pdf]

# OpenBookQA, granite-3.1-8b to Qwen3-32B

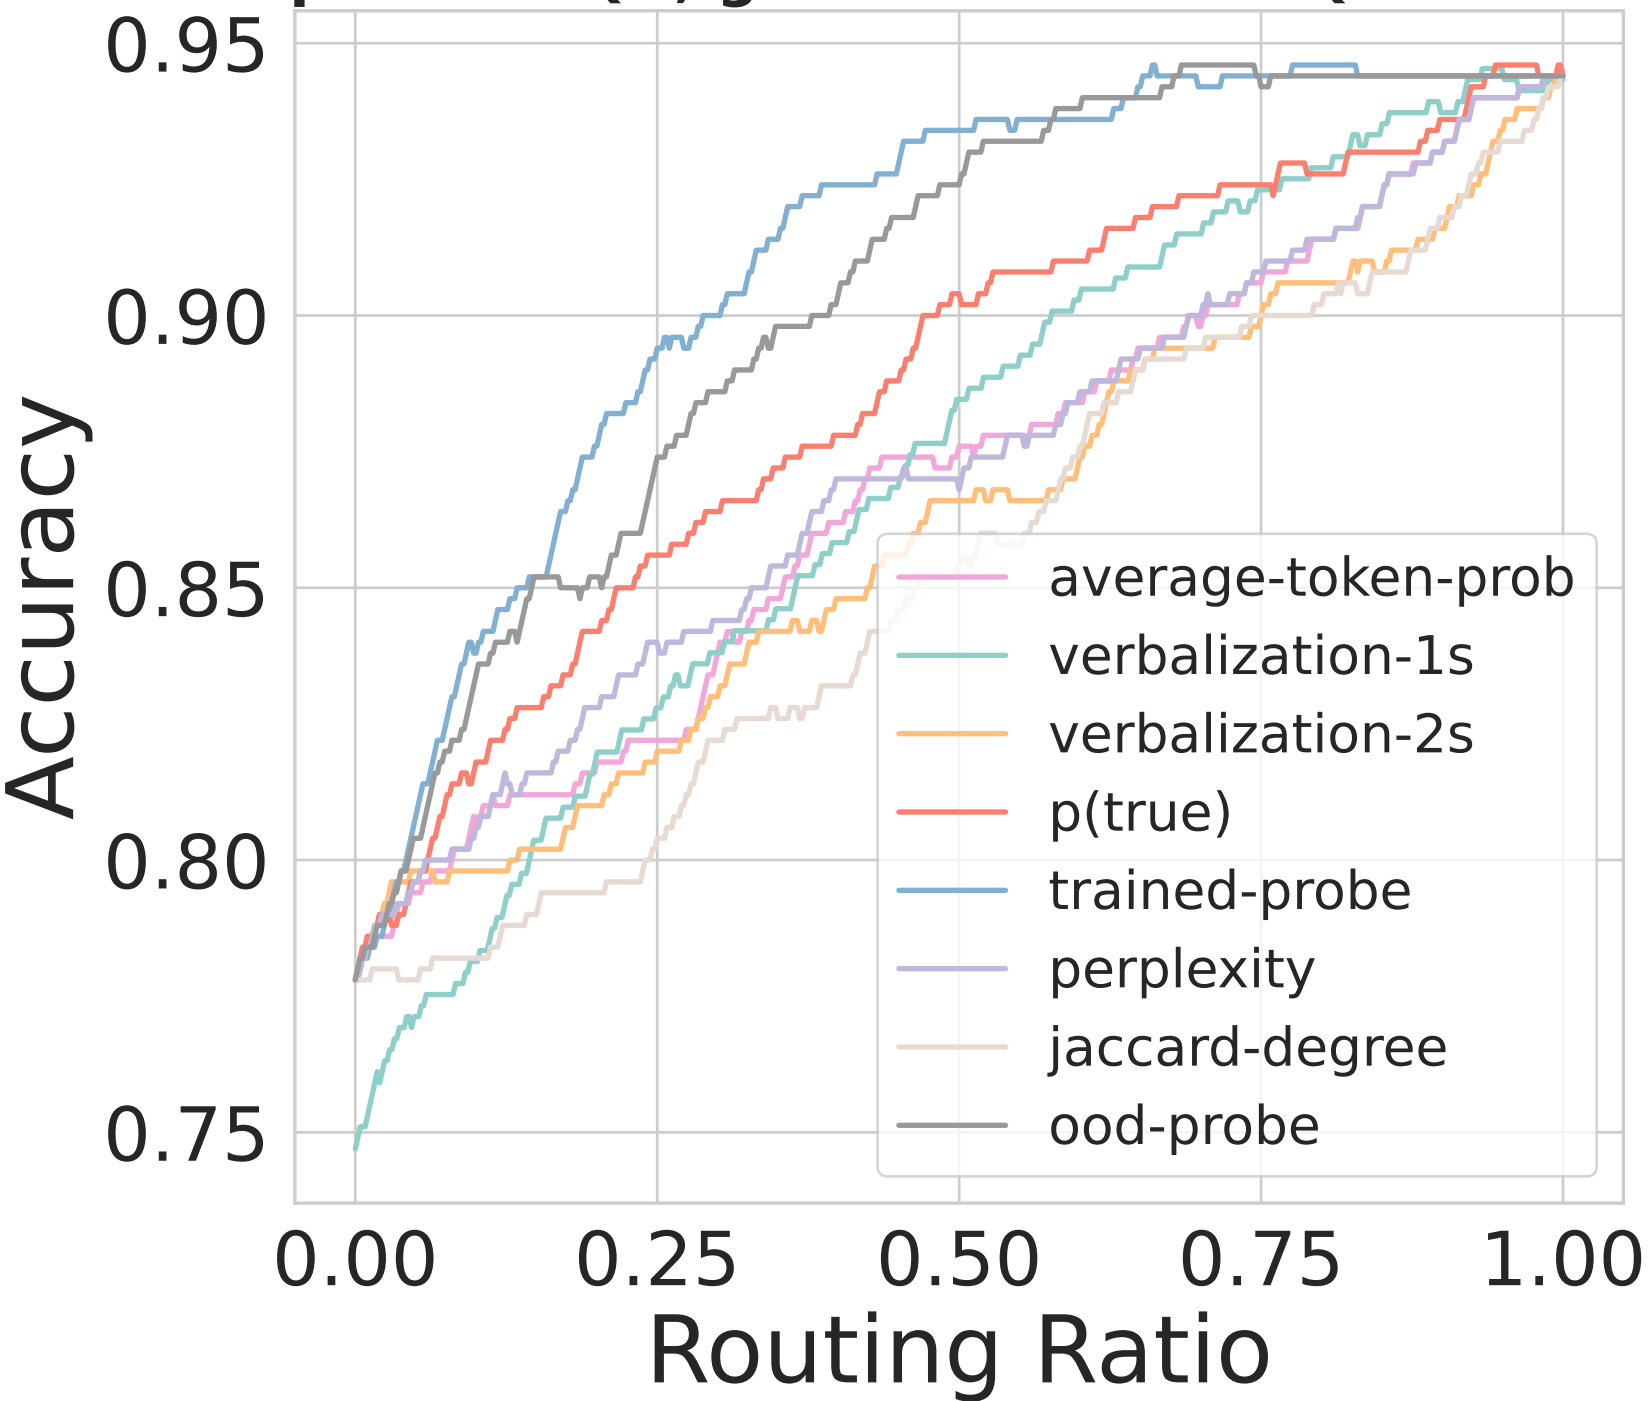

Supplement: supplementary_material [file rr_acc_openbook_qa_granite-3.1-8b_qwen32.pdf › Routing_SLM_LLMs/Uncertainty-based Routing/w_legend/to_qwen32/rr_acc_openbook_qa_granite-3.1-8b_qwen32.pdf]

# OpenBookQA, llama-3.1-8b to Qwen3-32B

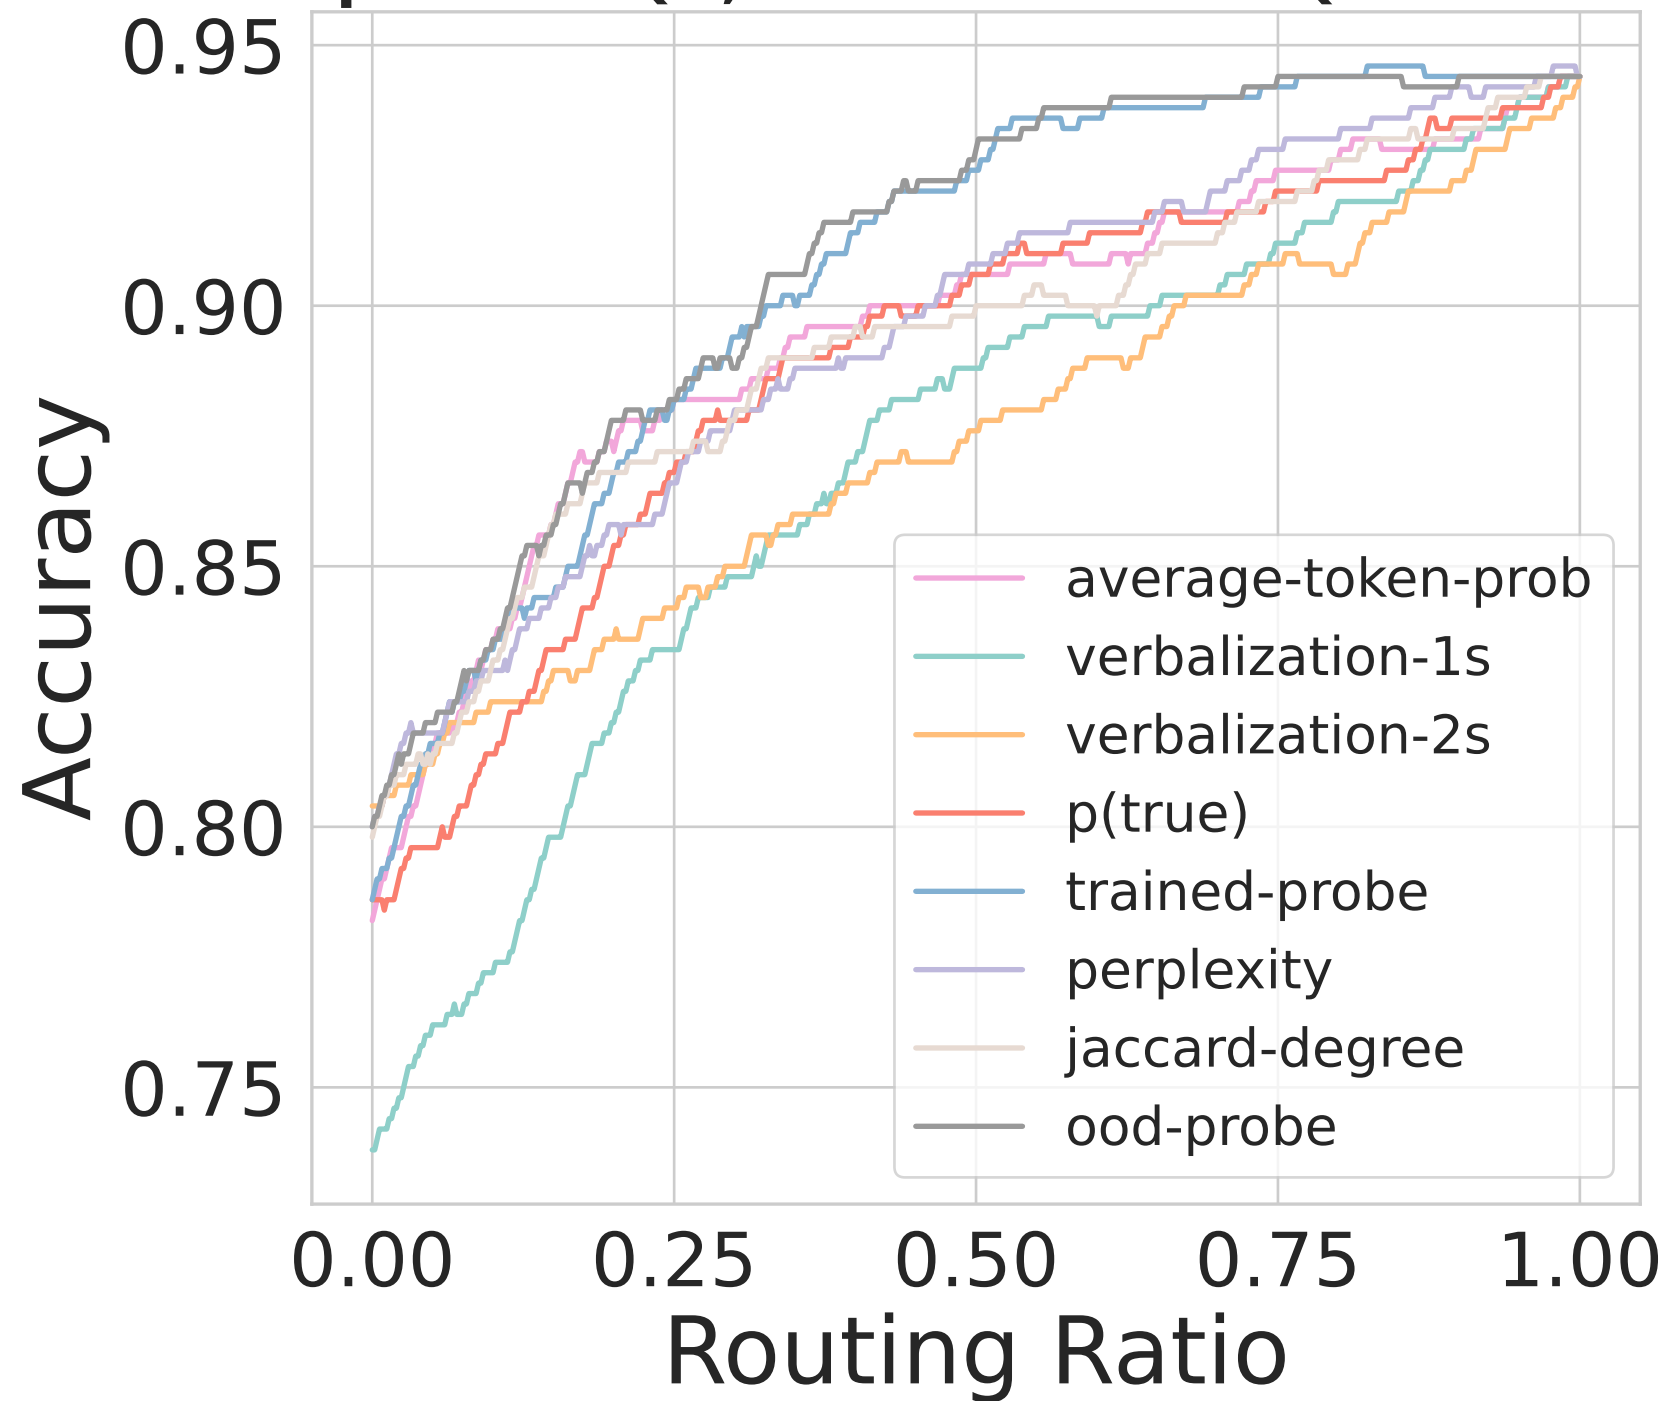

Supplement: supplementary_material [file rr_acc_openbook_qa_llama-3.1-8b_qwen32.pdf › Routing_SLM_LLMs/Uncertainty-based Routing/w_legend/to_qwen32/rr_acc_openbook_qa_llama-3.1-8b_qwen32.pdf]

# OpenBookQA, llama-3.2-3b to Qwen3-32B

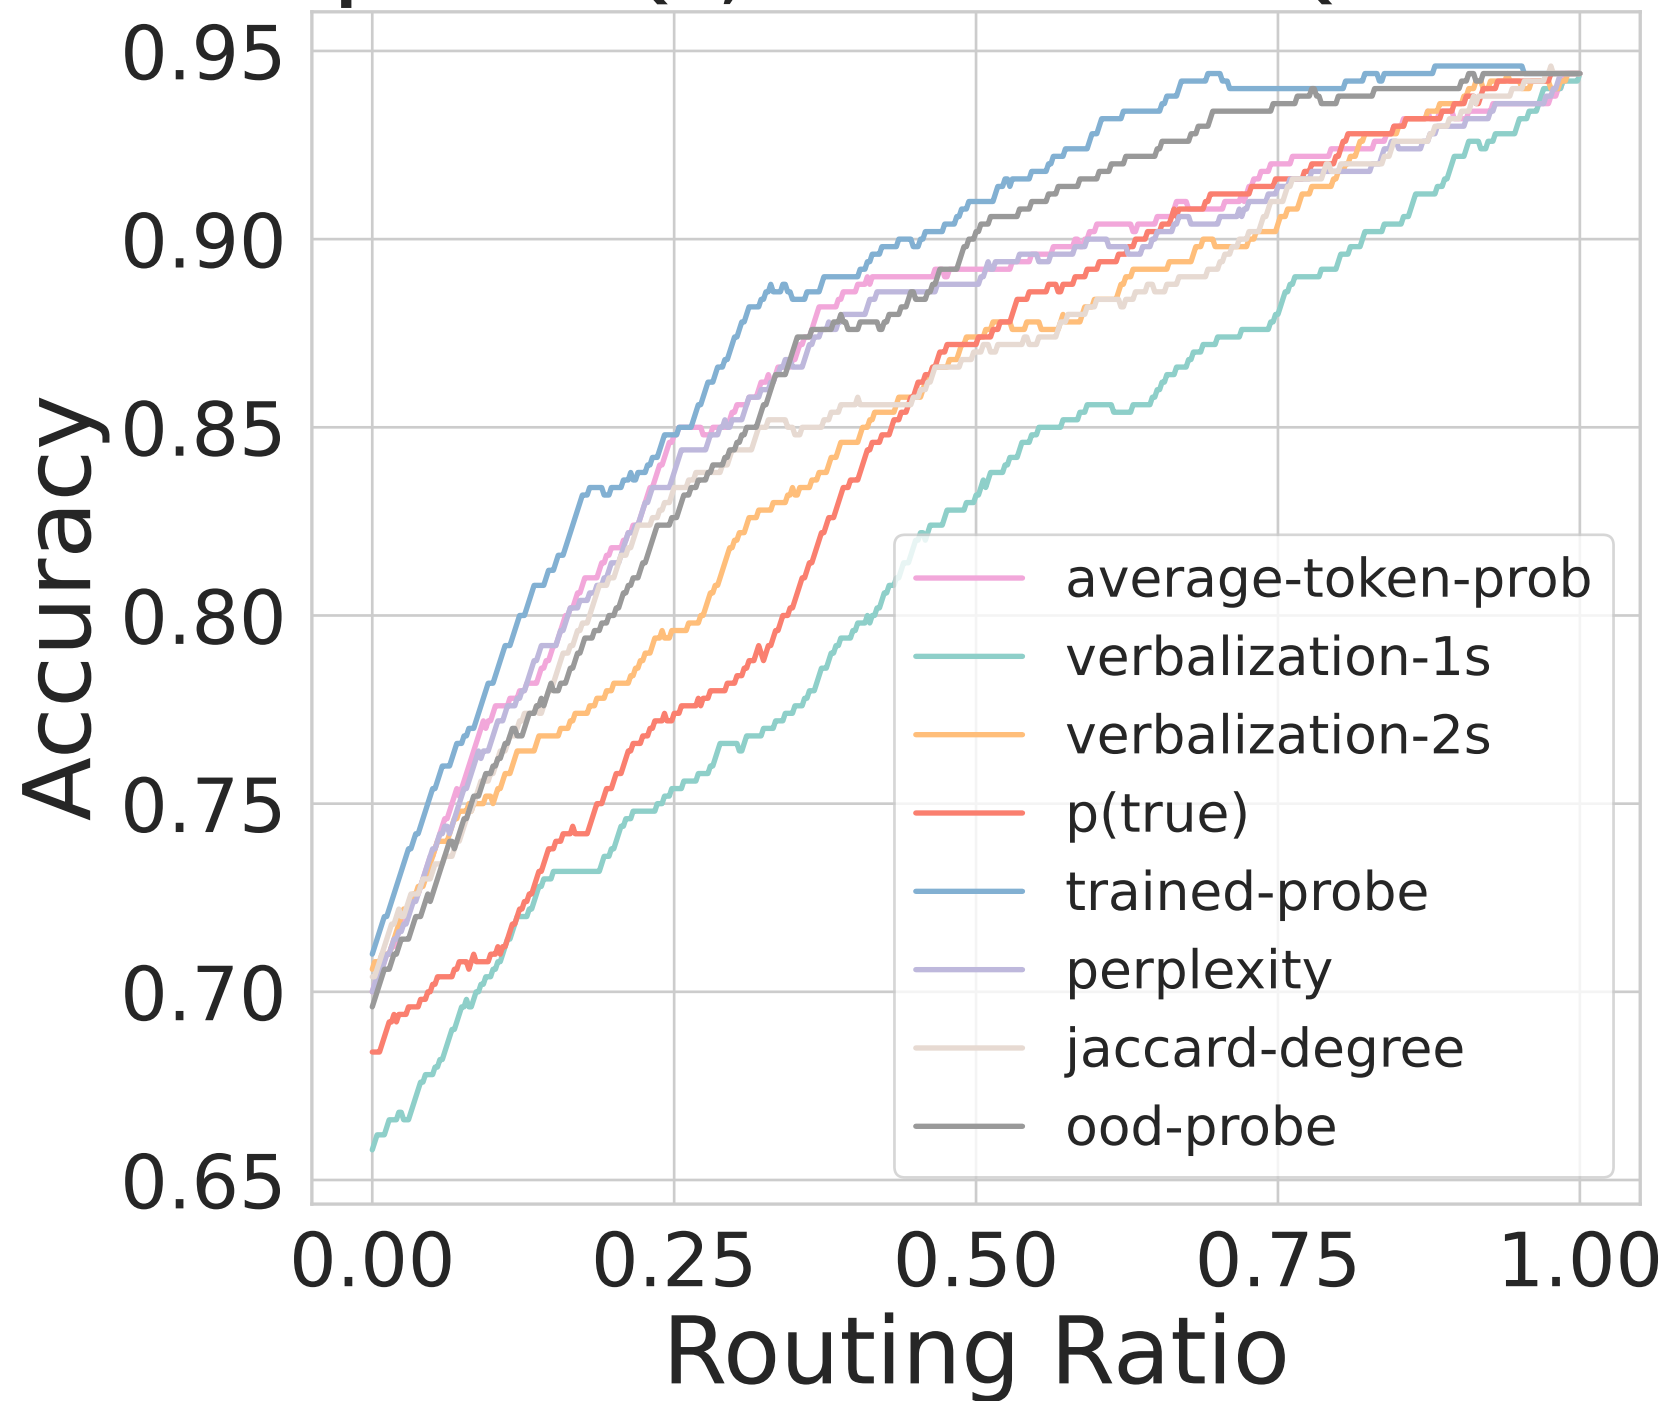

Supplement: supplementary_material [file rr_acc_openbook_qa_llama-3.2-3b_qwen32.pdf › Routing_SLM_LLMs/Uncertainty-based Routing/w_legend/to_qwen32/rr_acc_openbook_qa_llama-3.2-3b_qwen32.pdf]

# OpenBookQA, mistral-7b to Qwen3-32B

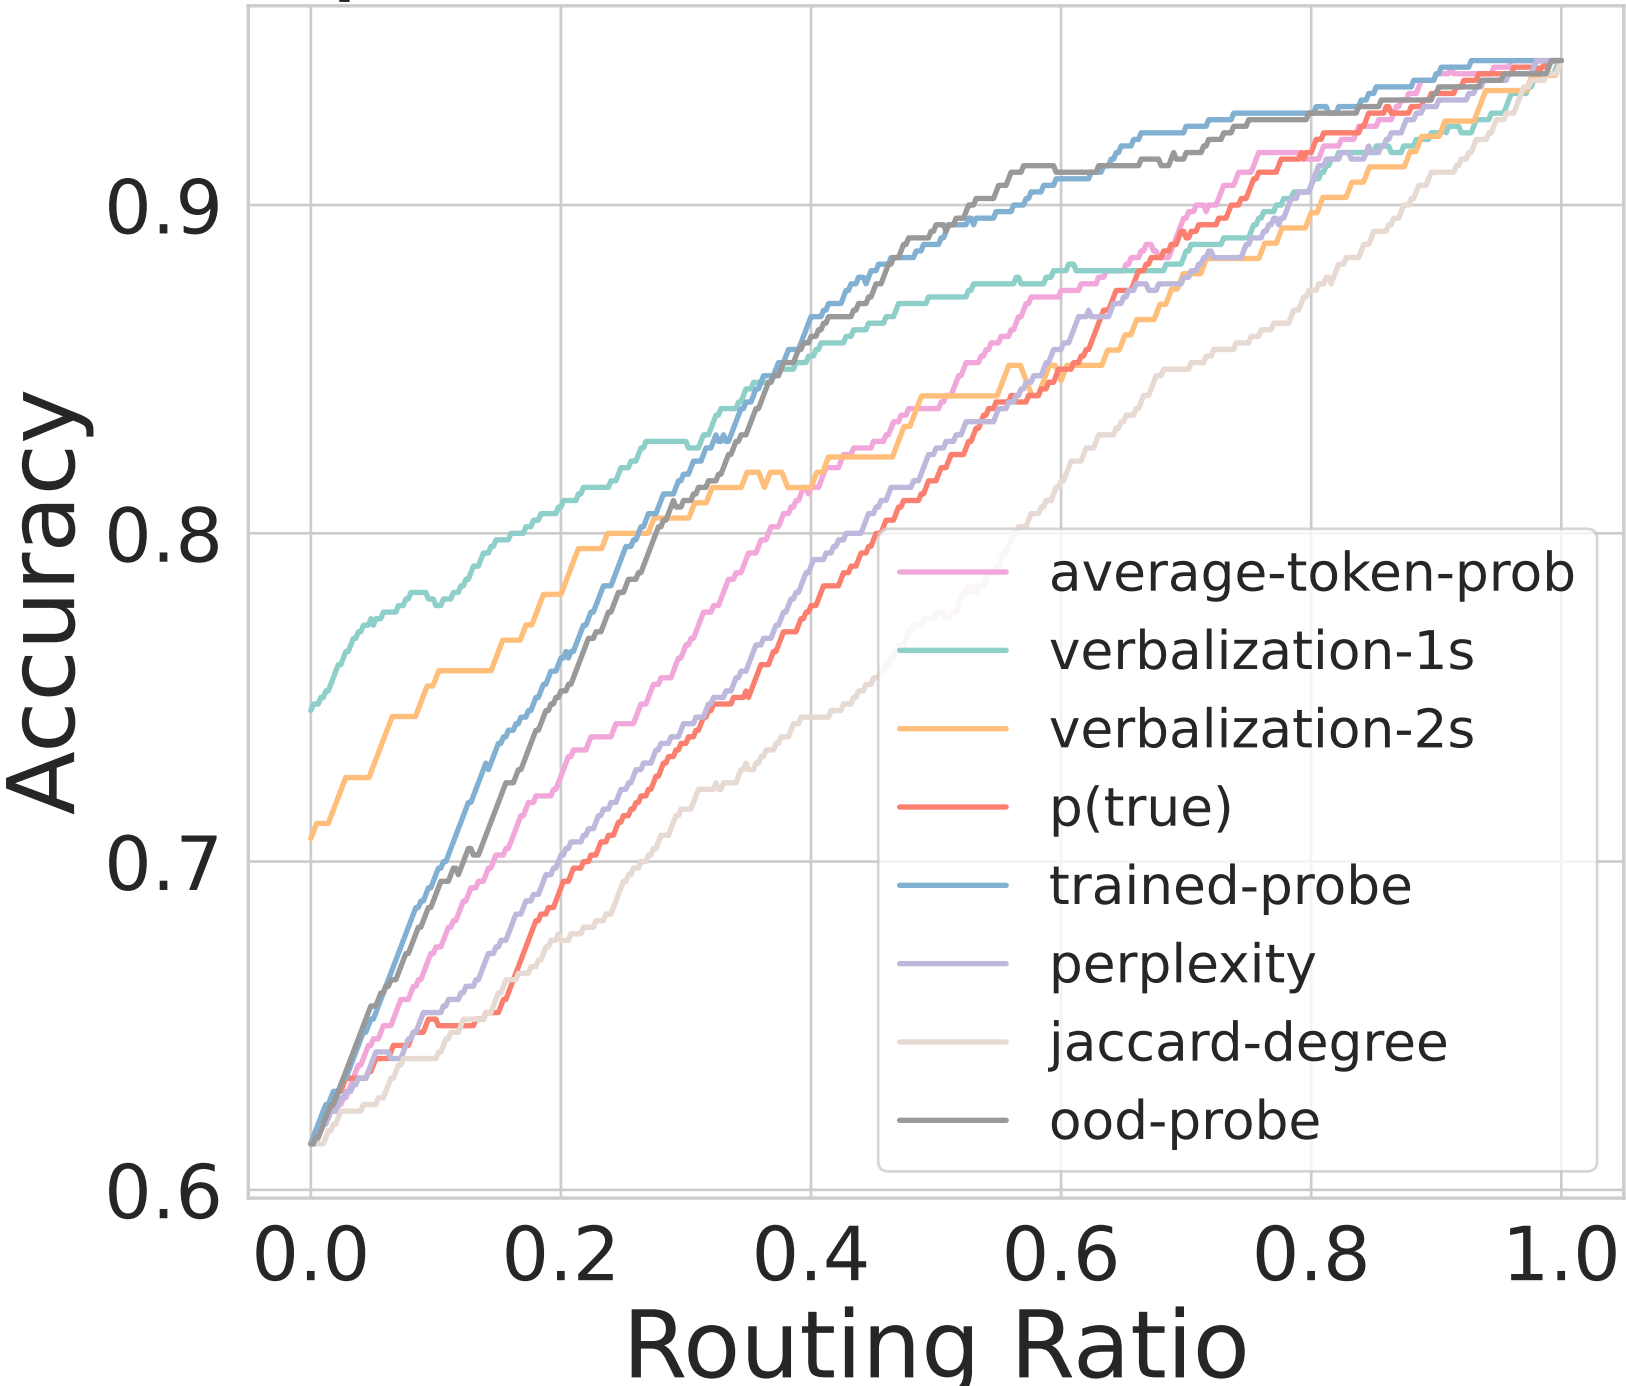

Supplement: supplementary_material [file rr_acc_openbook_qa_mistral-7b_qwen32.pdf › Routing_SLM_LLMs/Uncertainty-based Routing/w_legend/to_qwen32/rr_acc_openbook_qa_mistral-7b_qwen32.pdf]

OpenBookQA, phi-3.5-mini to Qwen3-32B

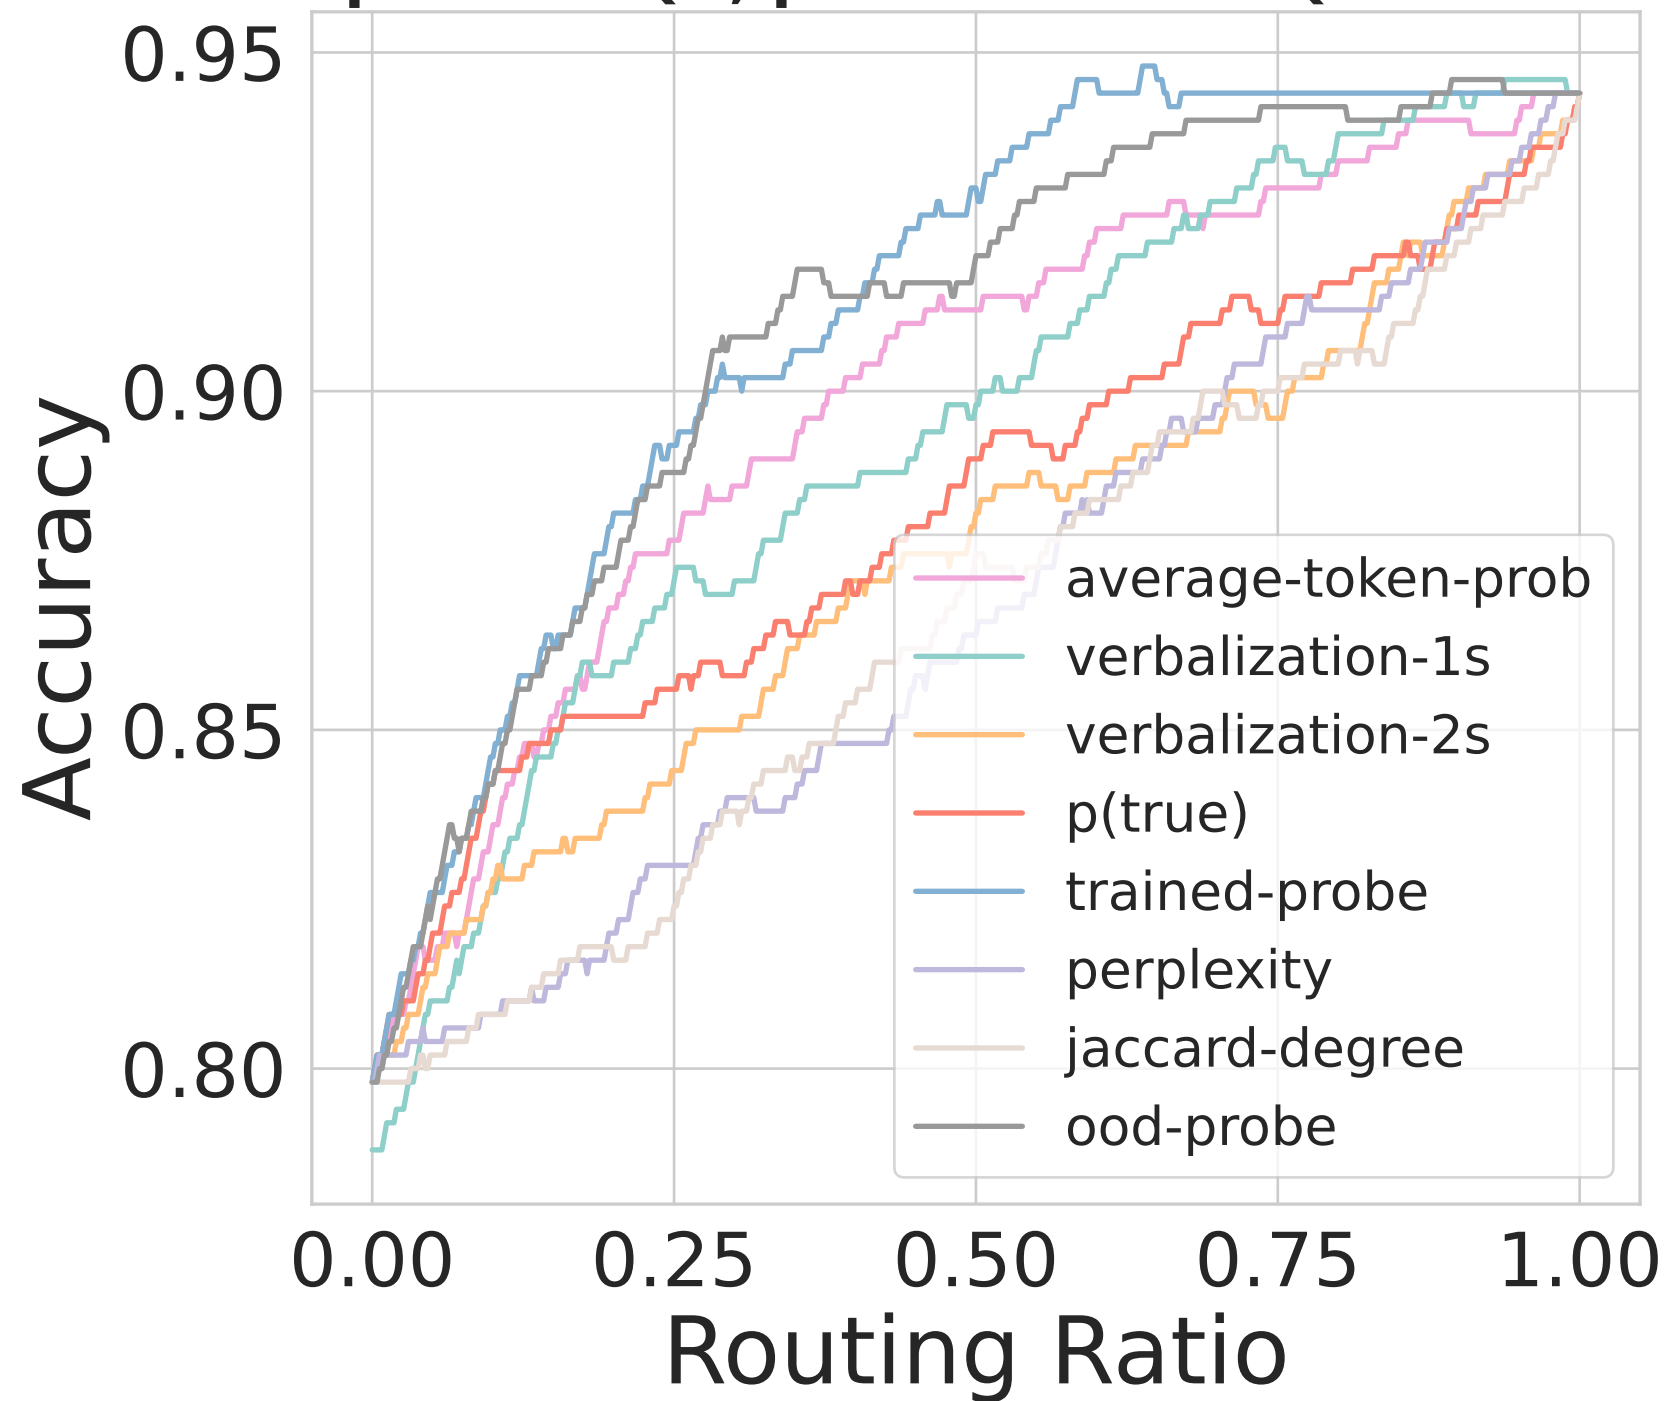

Supplement: supplementary_material [file rr_acc_openbook_qa_phi-3.5-mini_qwen32.pdf › Routing_SLM_LLMs/Uncertainty-based Routing/w_legend/to_qwen32/rr_acc_openbook_qa_phi-3.5-mini_qwen32.pdf]

# OpenBookQA, phi-4-mini-reasoning to Qwen3-32B

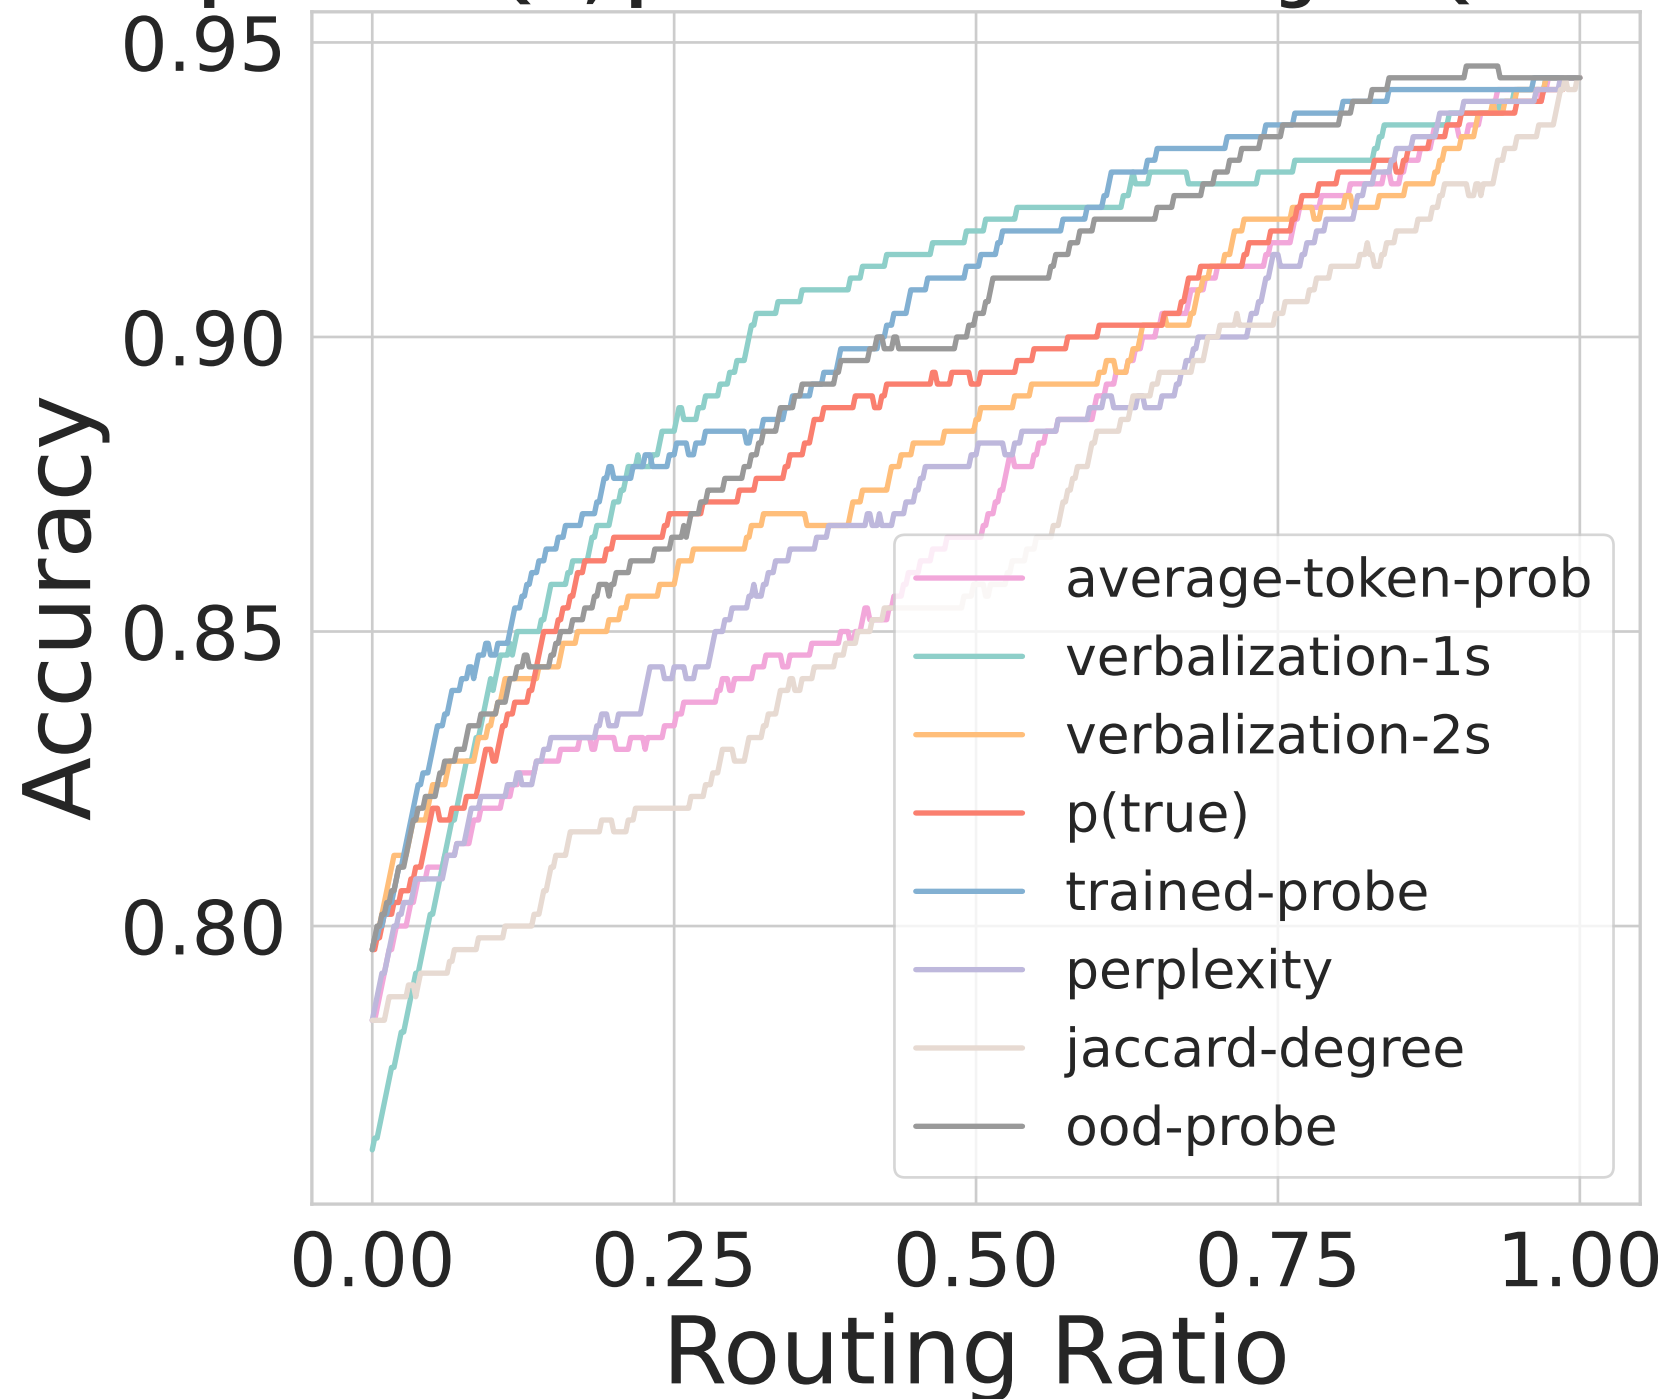

Supplement: supplementary_material [file rr_acc_openbook_qa_phi-4-mini-reasoning_qwen32.pdf › Routing_SLM_LLMs/Uncertainty-based Routing/w_legend/to_qwen32/rr_acc_openbook_qa_phi-4-mini-reasoning_qwen32.pdf]

OpenBookQA, qwen-2.5-7b to Qwen3-32B

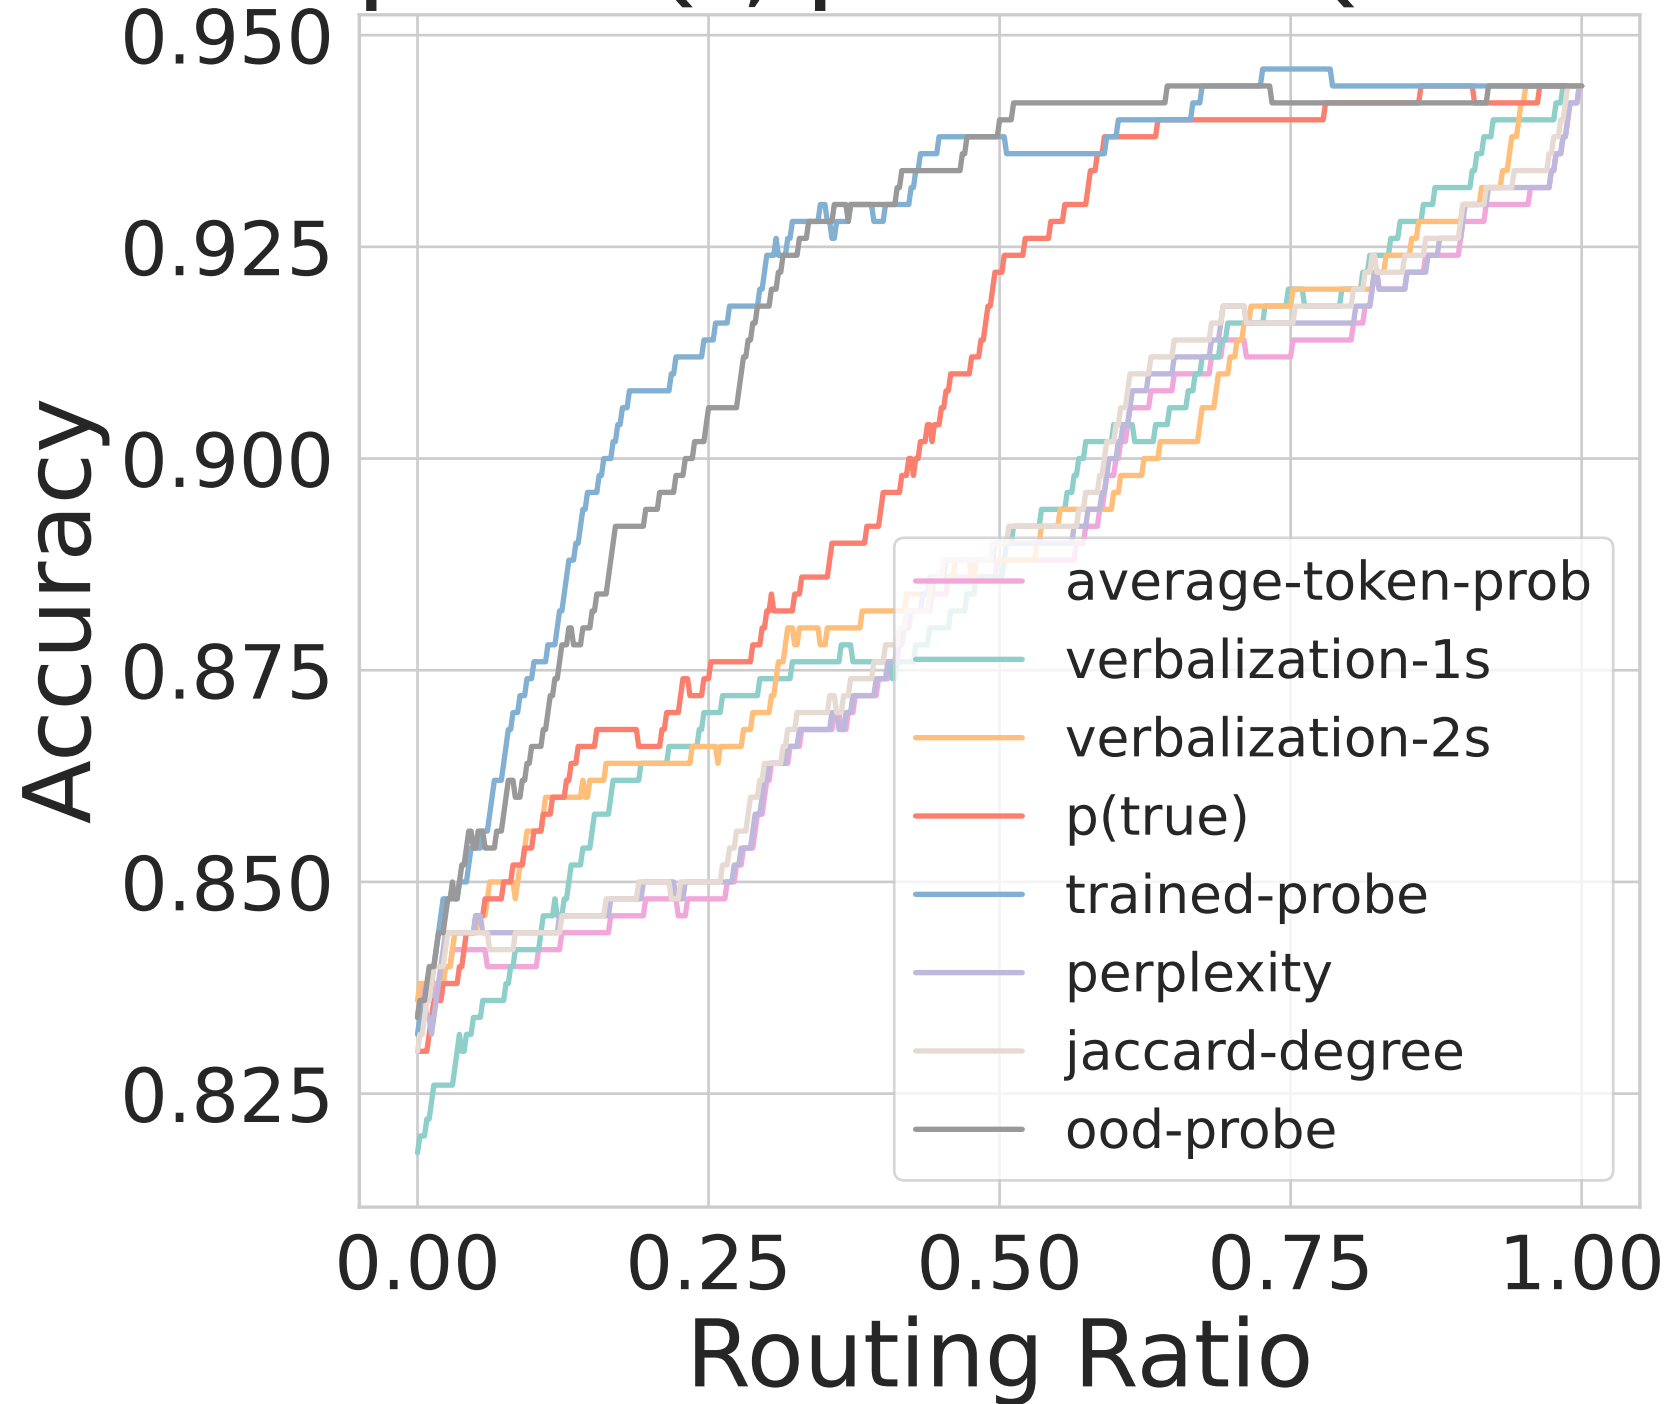

Supplement: supplementary_material [file rr_acc_openbook_qa_qwen-2.5-7b_qwen32.pdf › Routing_SLM_LLMs/Uncertainty-based Routing/w_legend/to_qwen32/rr_acc_openbook_qa_qwen-2.5-7b_qwen32.pdf]

# OpenBookQA, rwkv to Qwen3-32B

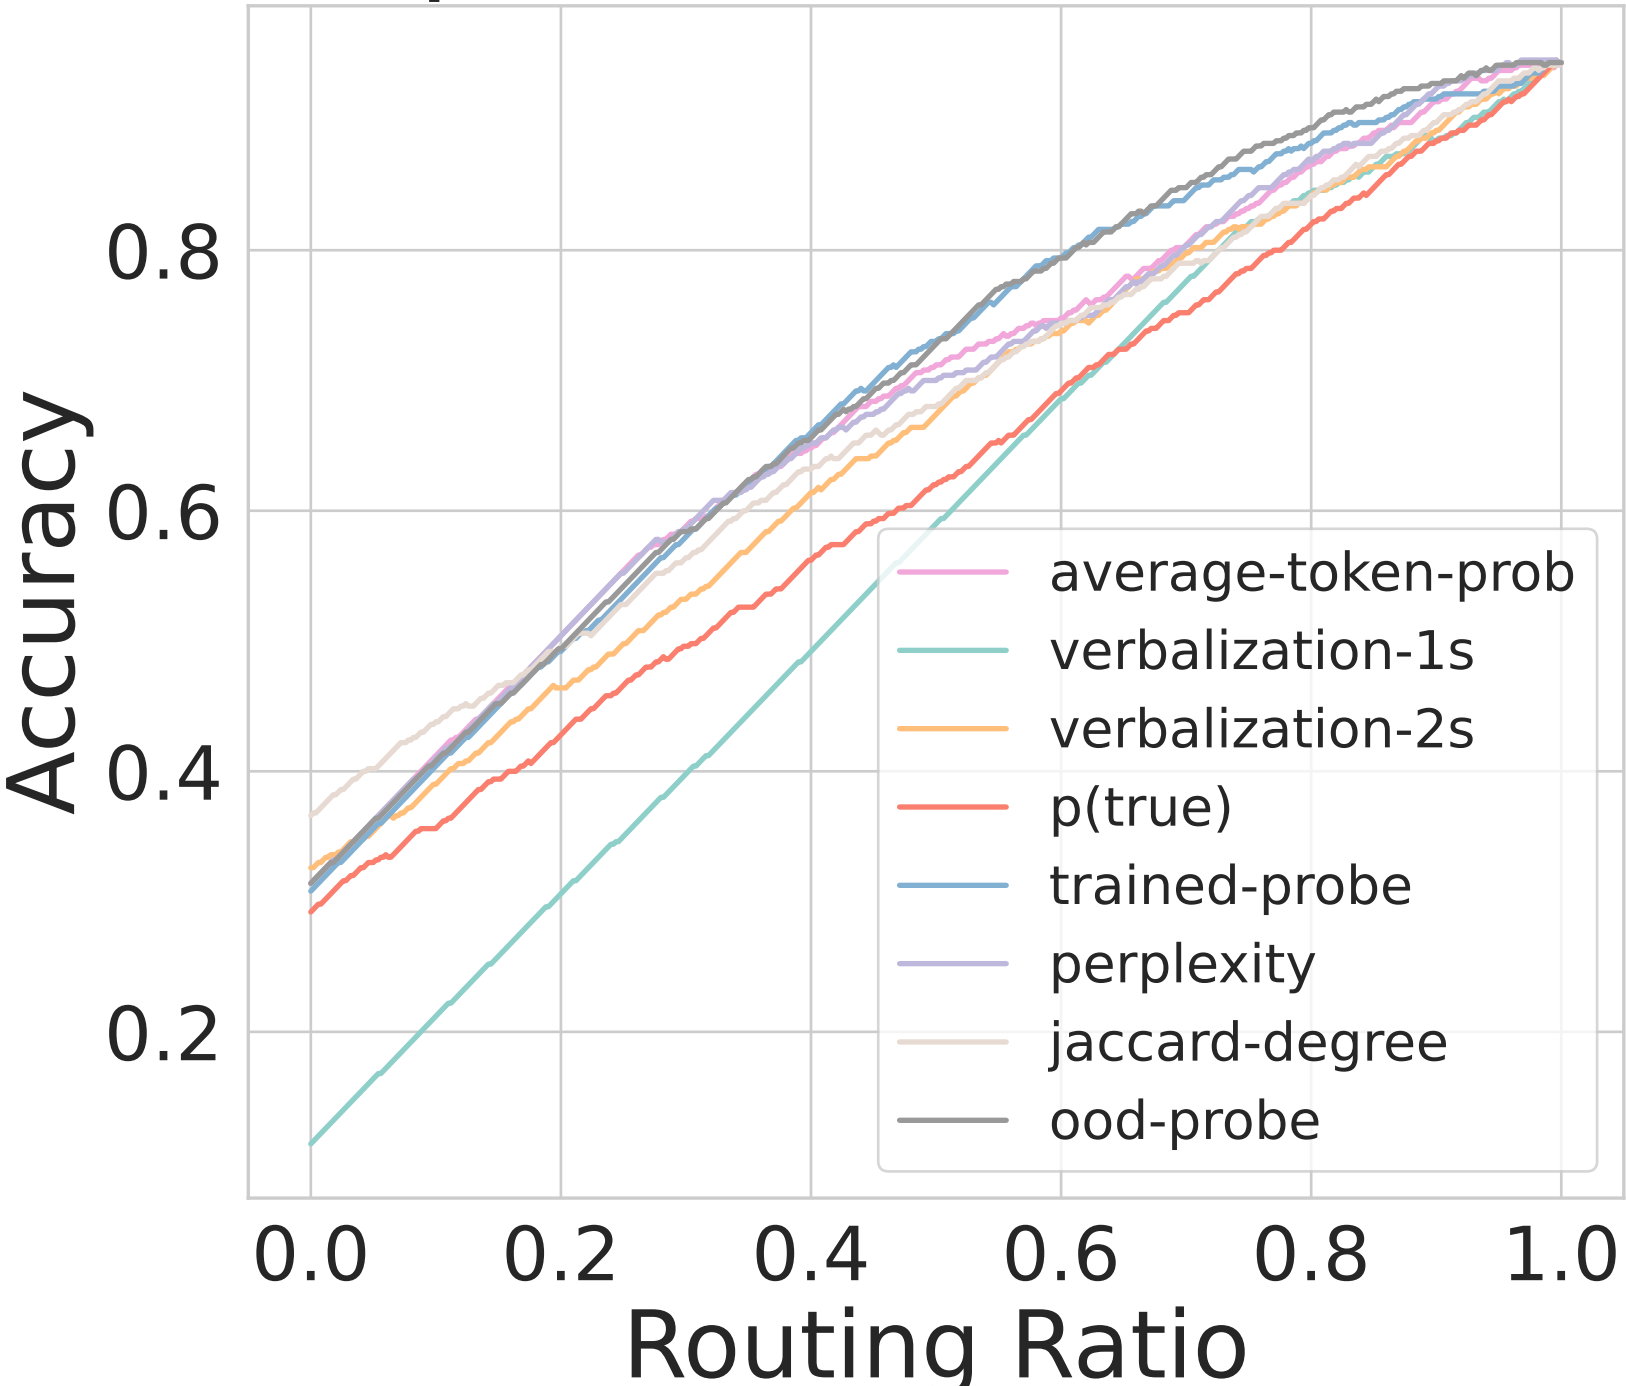

Supplement: supplementary_material [file rr_acc_openbook_qa_rwkv_qwen32.pdf › Routing_SLM_LLMs/Uncertainty-based Routing/w_legend/to_qwen32/rr_acc_openbook_qa_rwkv_qwen32.pdf]

## PIQA, Qwen3-0.6B to Qwen3-32B

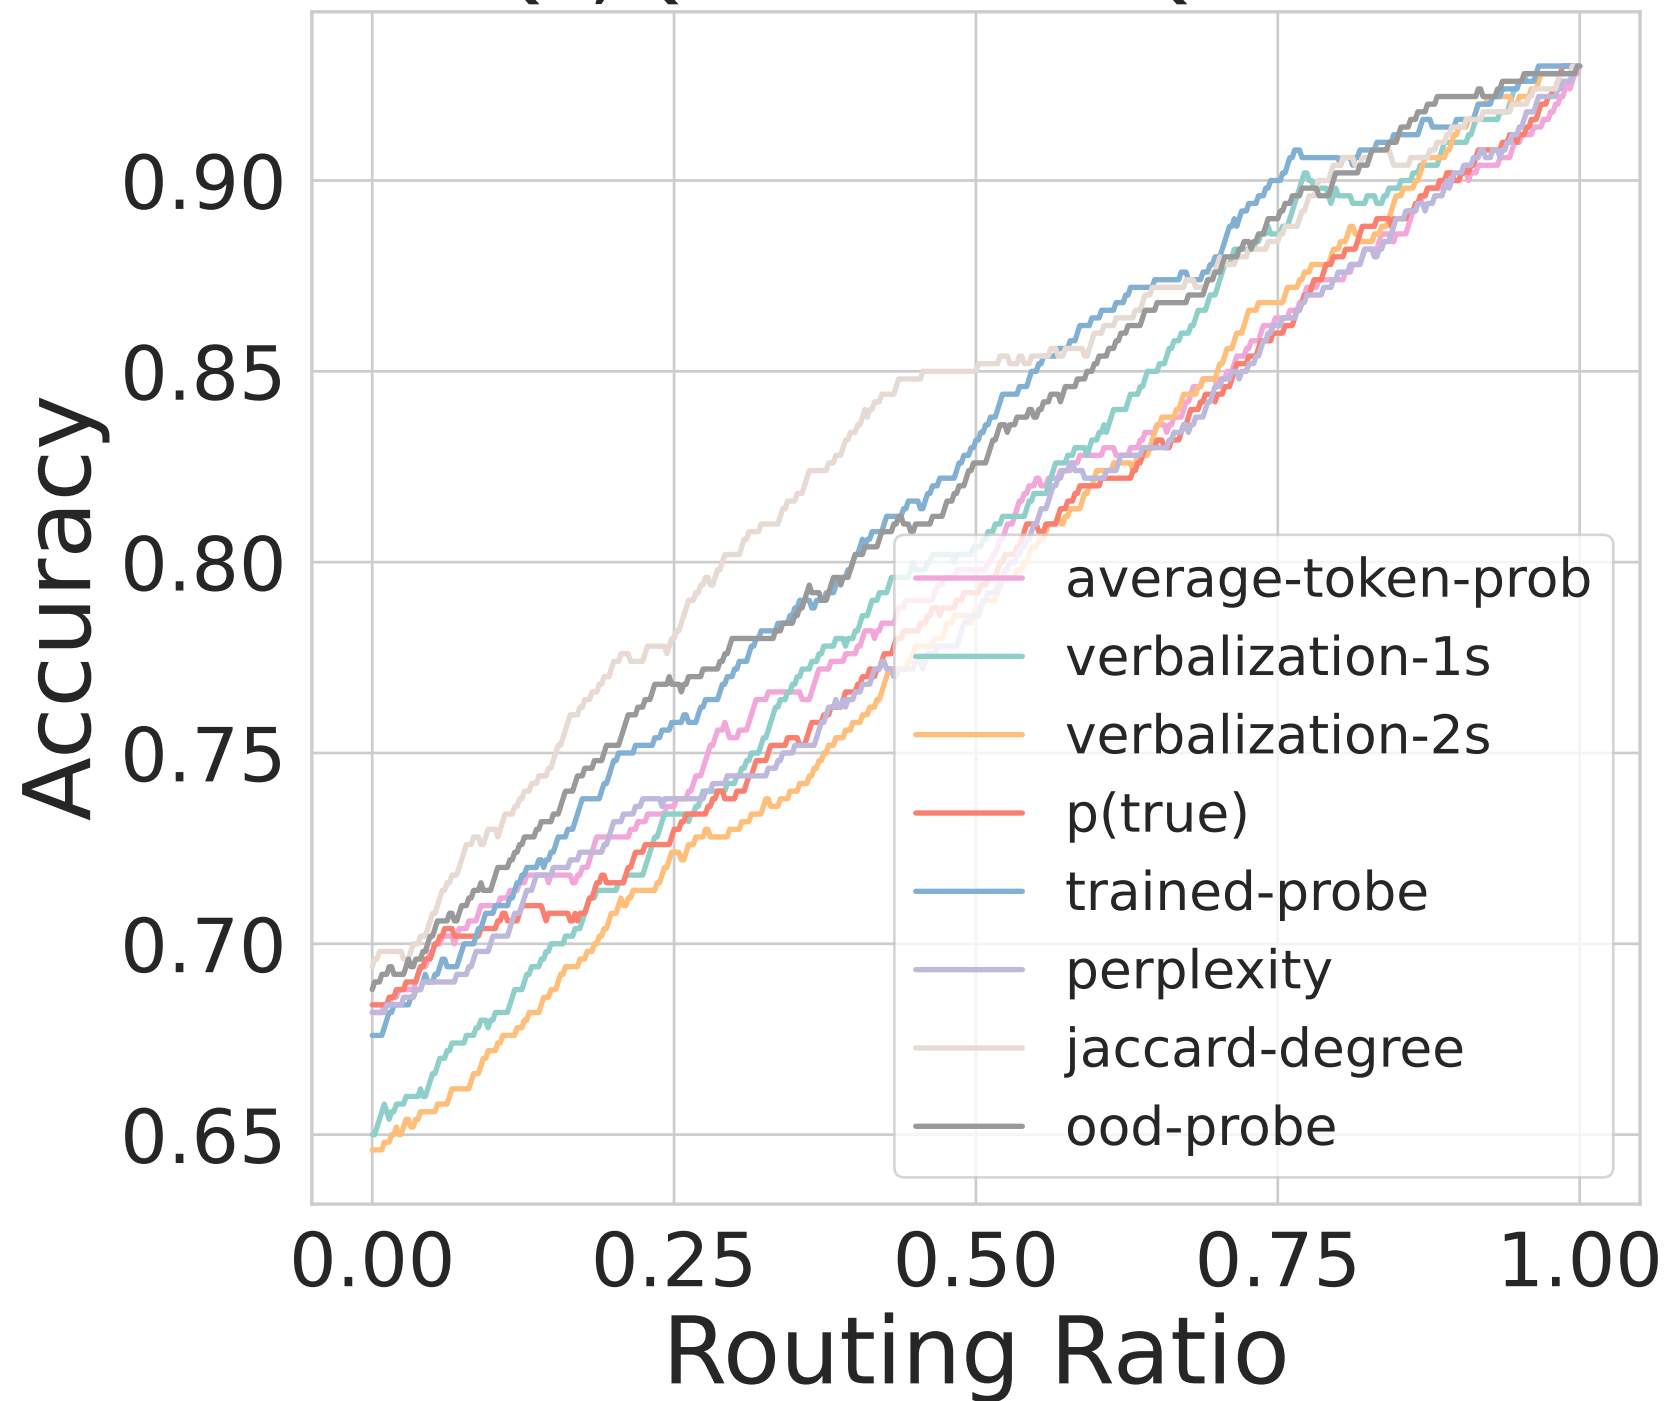

Supplement: supplementary_material [file rr_acc_pi_qa_Qwen3-0.6B_qwen32.pdf › Routing_SLM_LLMs/Uncertainty-based Routing/w_legend/to_qwen32/rr_acc_pi_qa_Qwen3-0.6B_qwen32.pdf]

**PIQA, Qwen3-1.7B to Qwen3-32B**

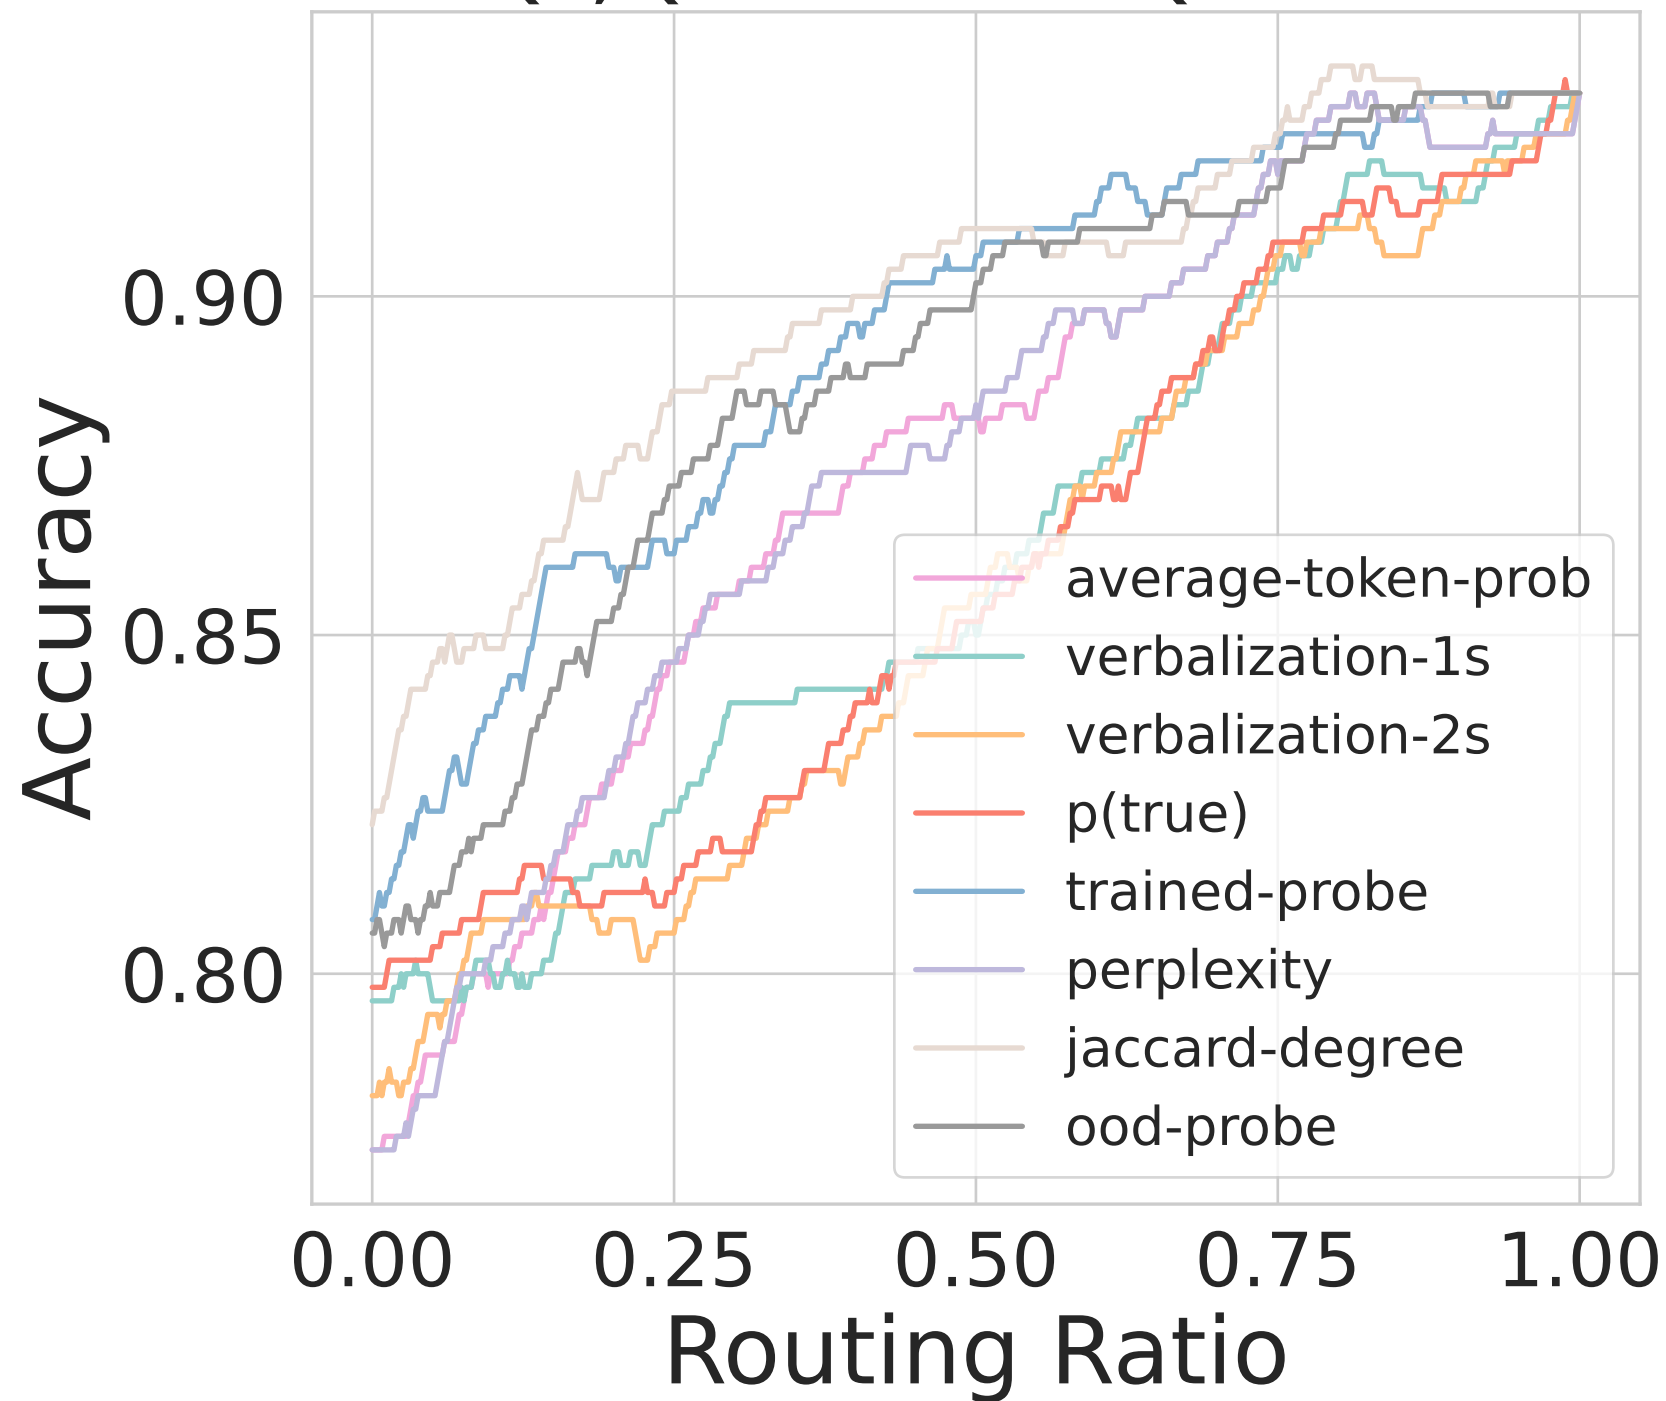

Supplement: supplementary_material [file rr_acc_pi_qa_Qwen3-1.7B_qwen32.pdf › Routing_SLM_LLMs/Uncertainty-based Routing/w_legend/to_qwen32/rr_acc_pi_qa_Qwen3-1.7B_qwen32.pdf]

## PIQA, Qwen3-4B to Qwen3-32B

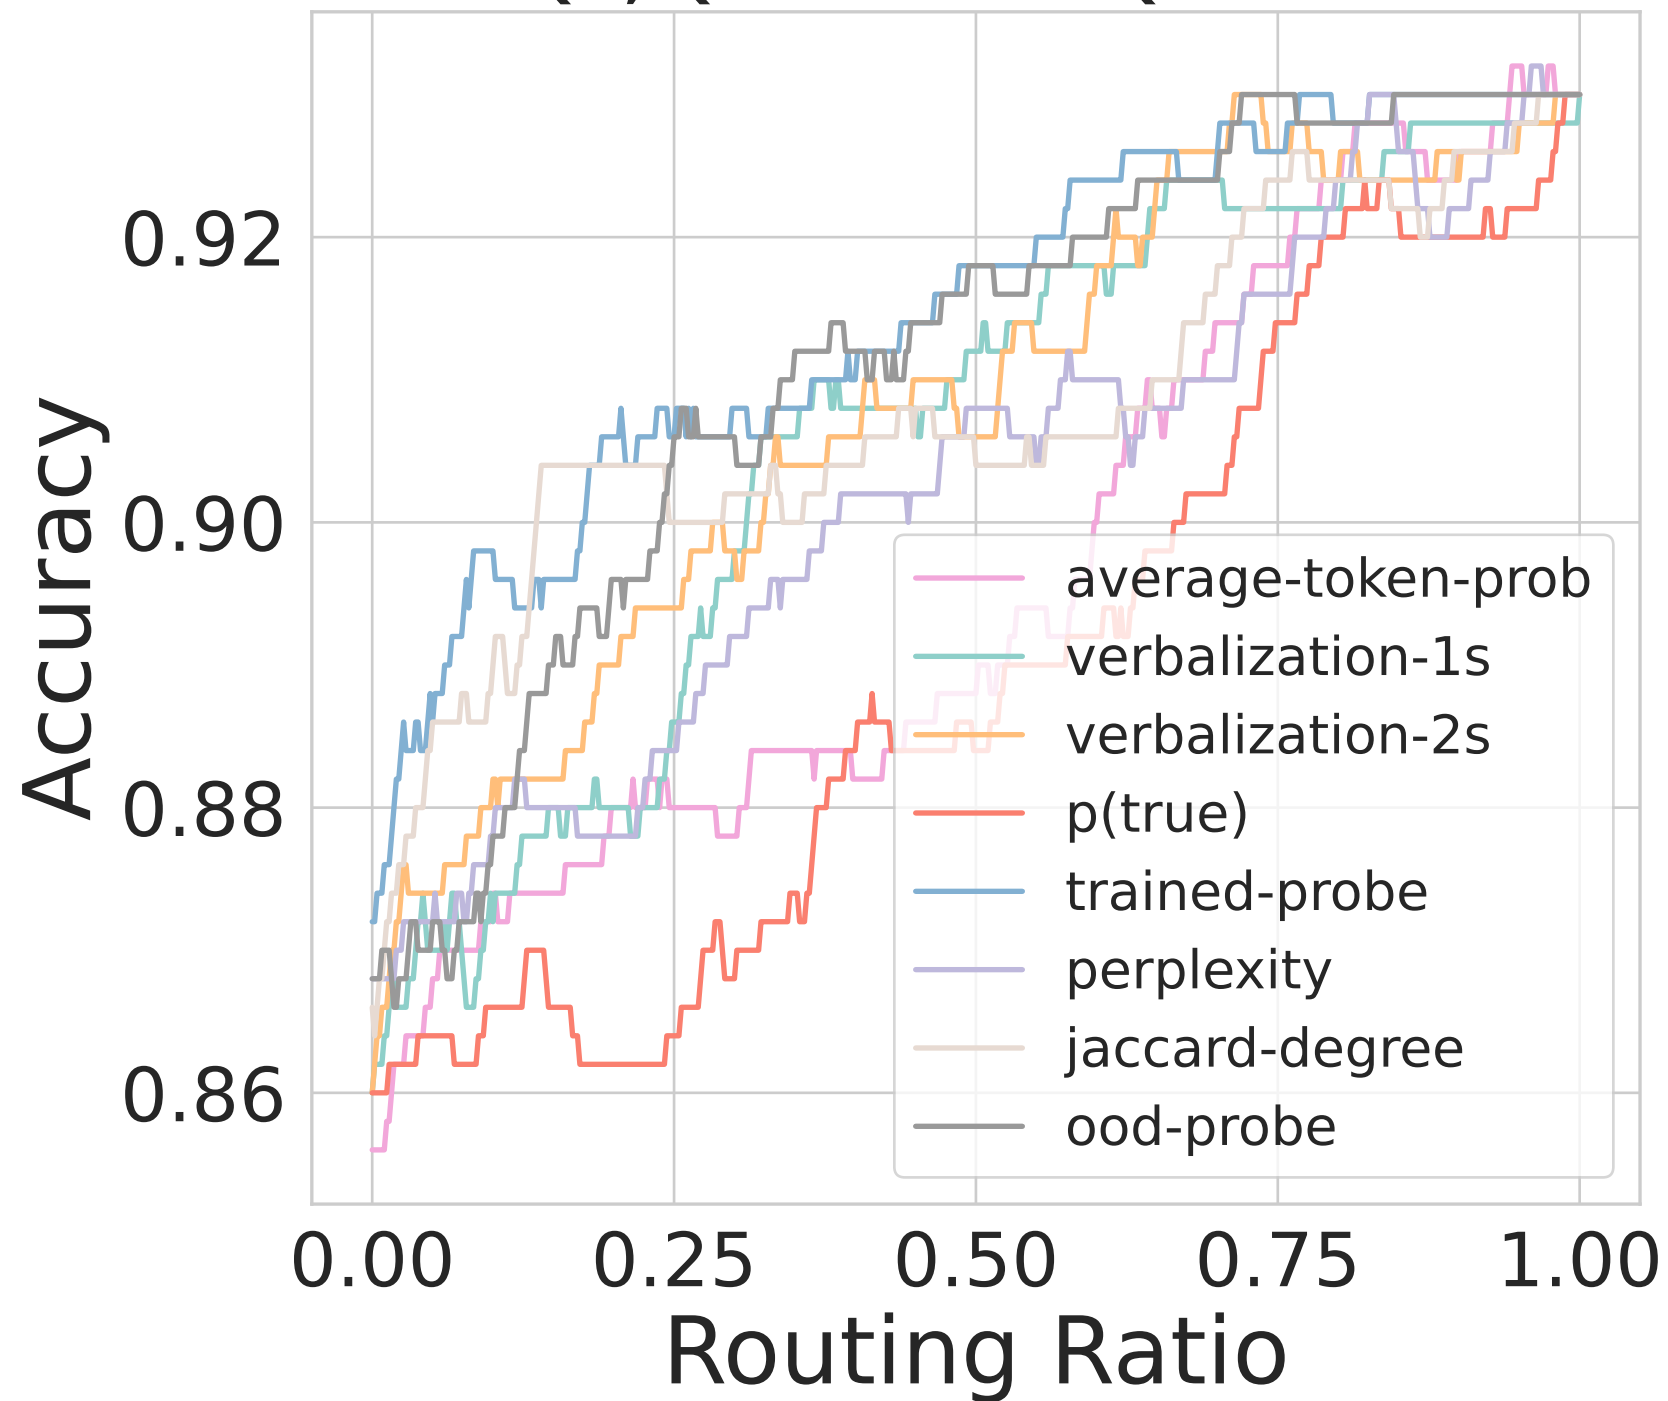

Supplement: supplementary_material [file rr_acc_pi_qa_Qwen3-4B_qwen32.pdf › Routing_SLM_LLMs/Uncertainty-based Routing/w_legend/to_qwen32/rr_acc_pi_qa_Qwen3-4B_qwen32.pdf]

**PIQA, granite-3.1-8b to Qwen3-32B**

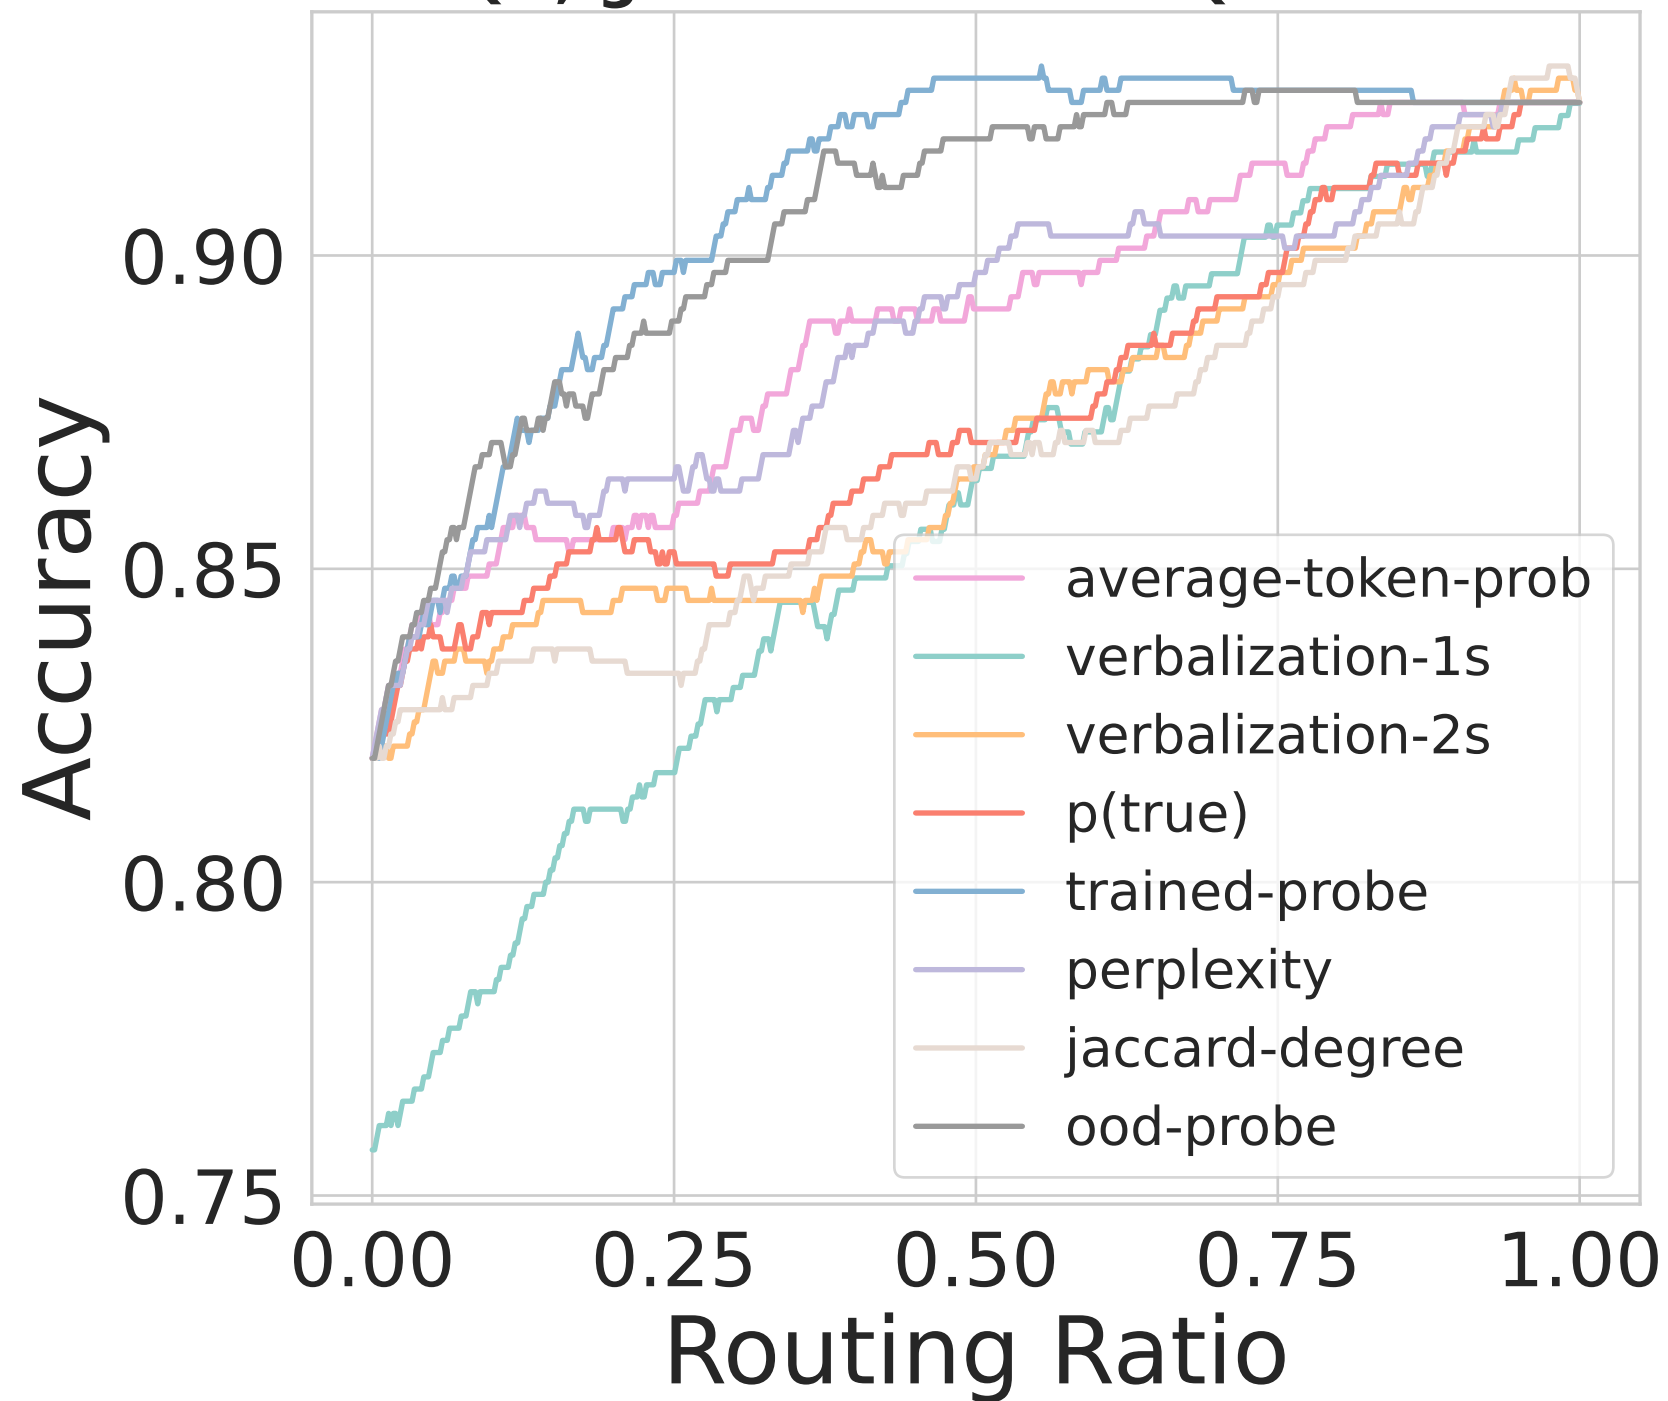

Supplement: supplementary_material [file rr_acc_pi_qa_granite-3.1-8b_qwen32.pdf › Routing_SLM_LLMs/Uncertainty-based Routing/w_legend/to_qwen32/rr_acc_pi_qa_granite-3.1-8b_qwen32.pdf]
