# Supplementary material (part 10 of 14)
Source: ML conference proceedings conference paper supplement (https://openreview.net/forum?id=smdbra3VEi)

## CoQA, llama-3.1-8b to GPT-4.1 mini

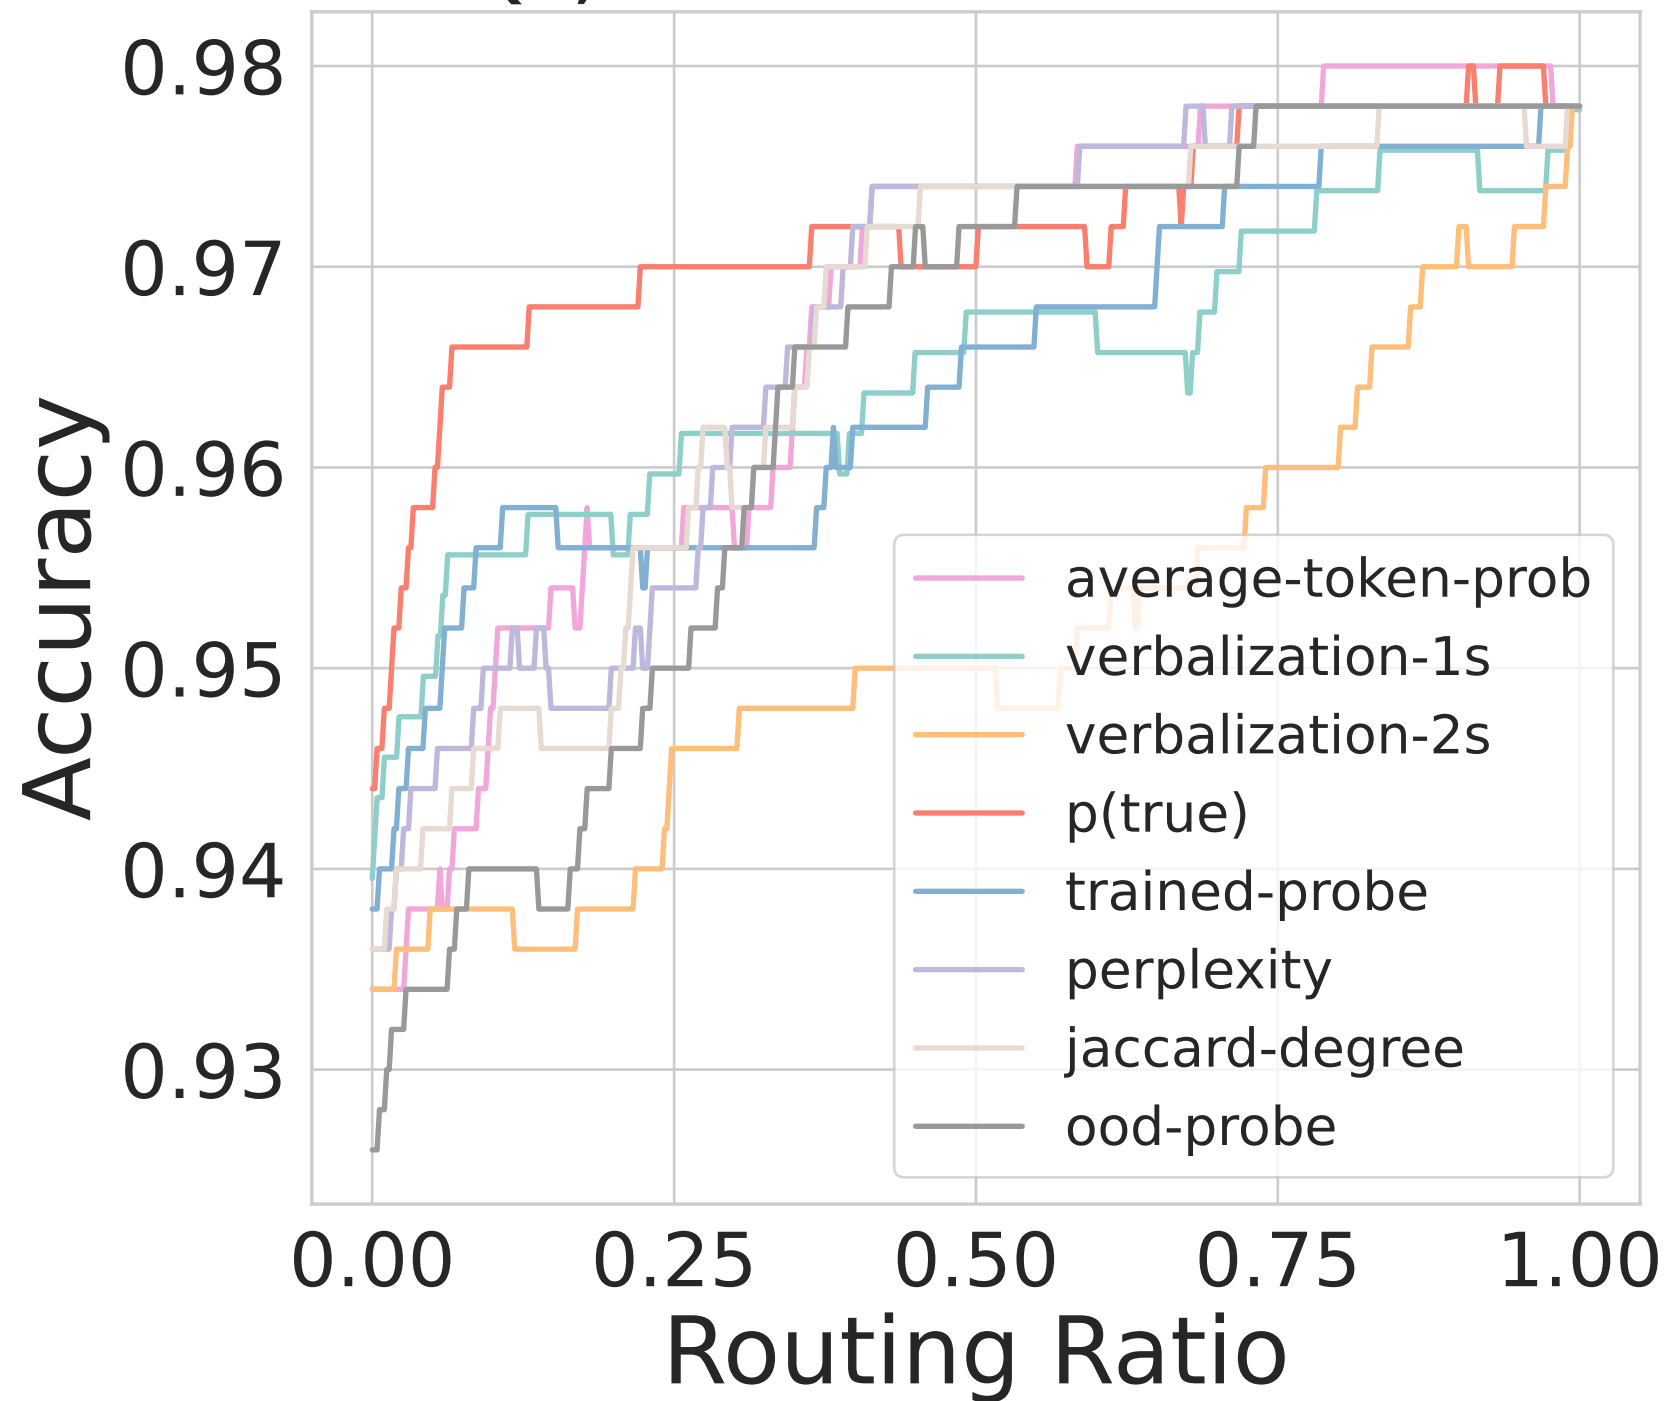

Supplement: supplementary_material [file rr_acc_co_qa_llama-3.1-8b_gpt41.pdf › Routing_SLM_LLMs/Uncertainty-based Routing/w_legend/to_gpt41/rr_acc_co_qa_llama-3.1-8b_gpt41.pdf]

## CoQA, llama-3.2-1b to GPT-4.1 mini

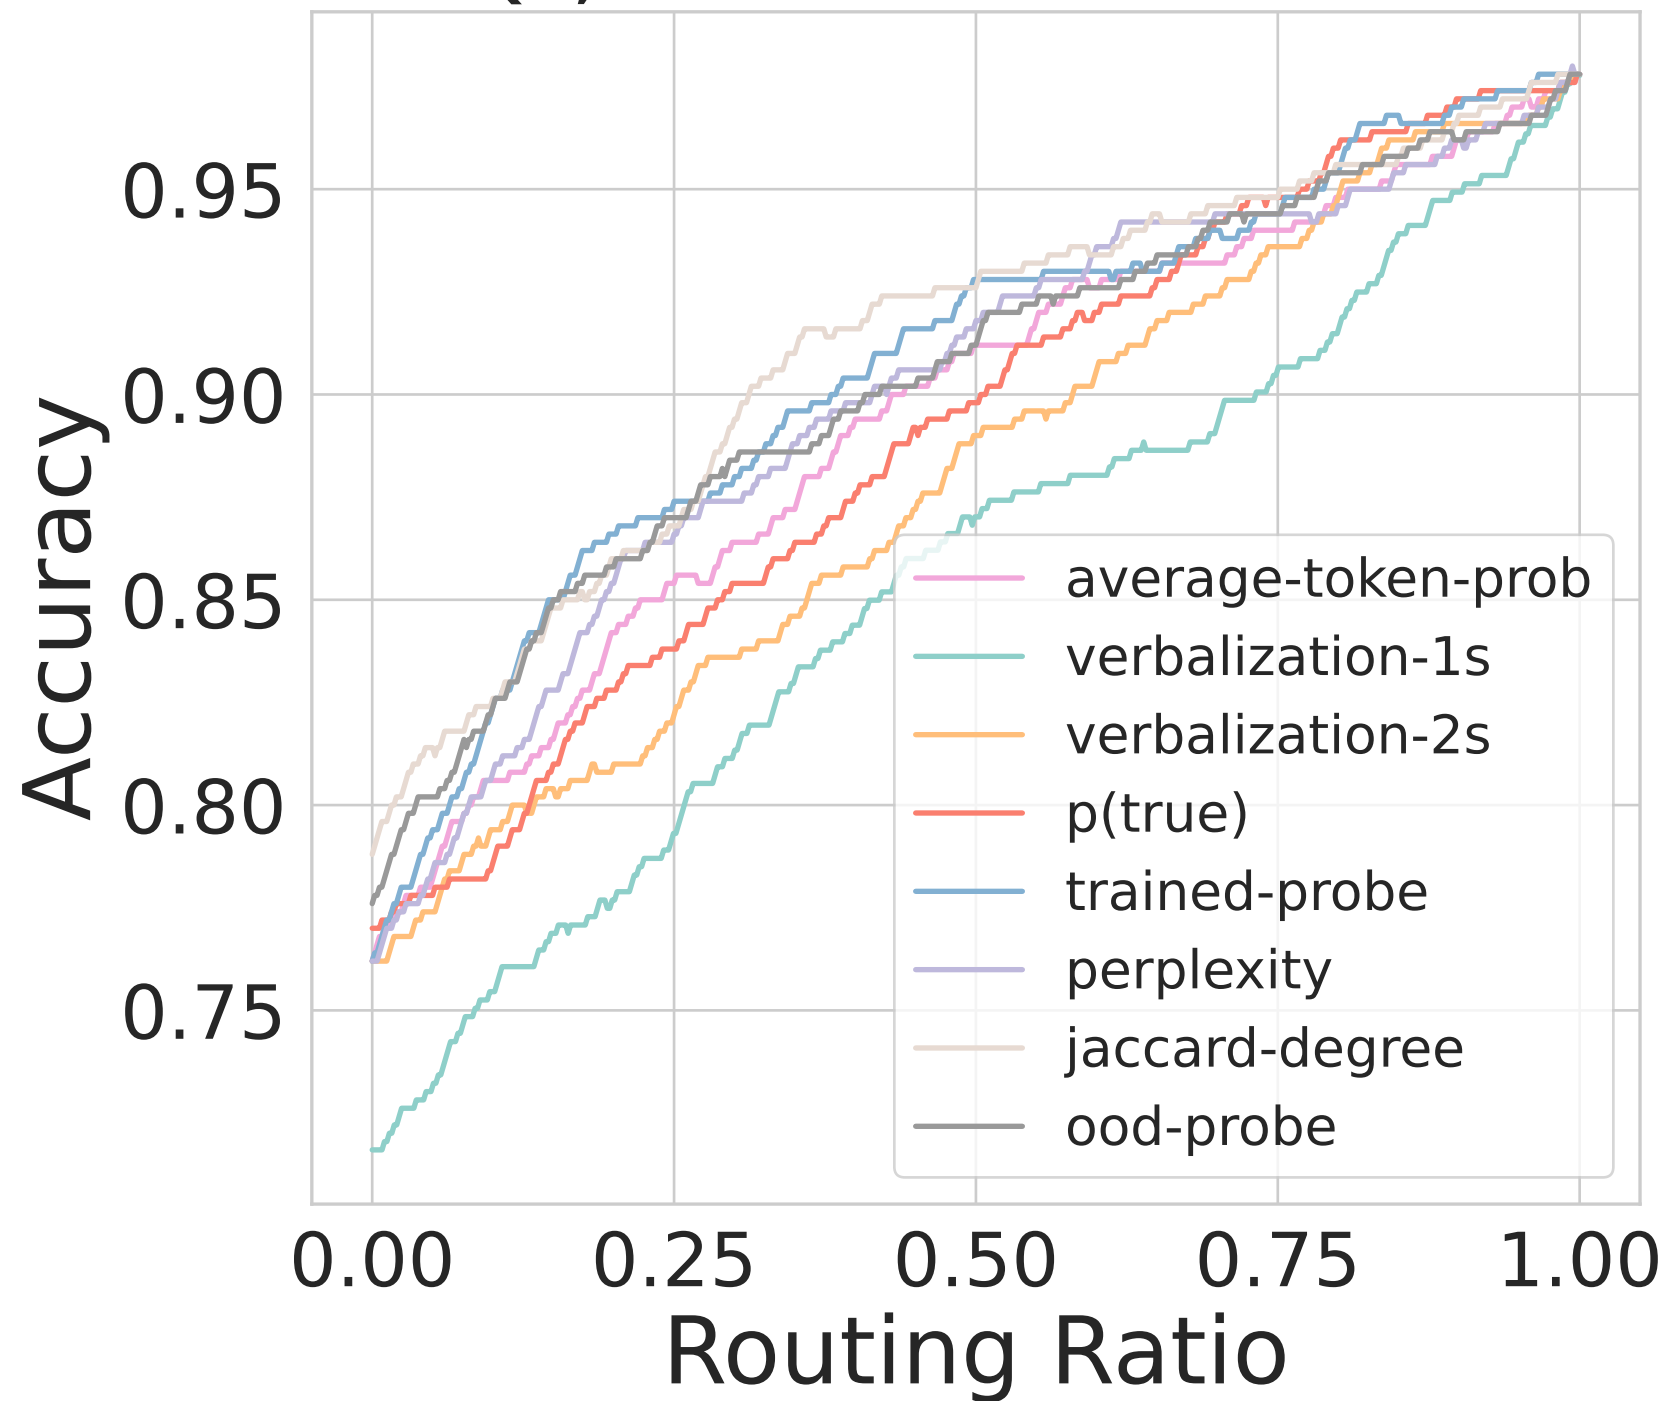

Supplement: supplementary_material [file rr_acc_co_qa_llama-3.2-1b_gpt41.pdf › Routing_SLM_LLMs/Uncertainty-based Routing/w_legend/to_gpt41/rr_acc_co_qa_llama-3.2-1b_gpt41.pdf]

## CoQA, llama-3.2-3b to GPT-4.1 mini

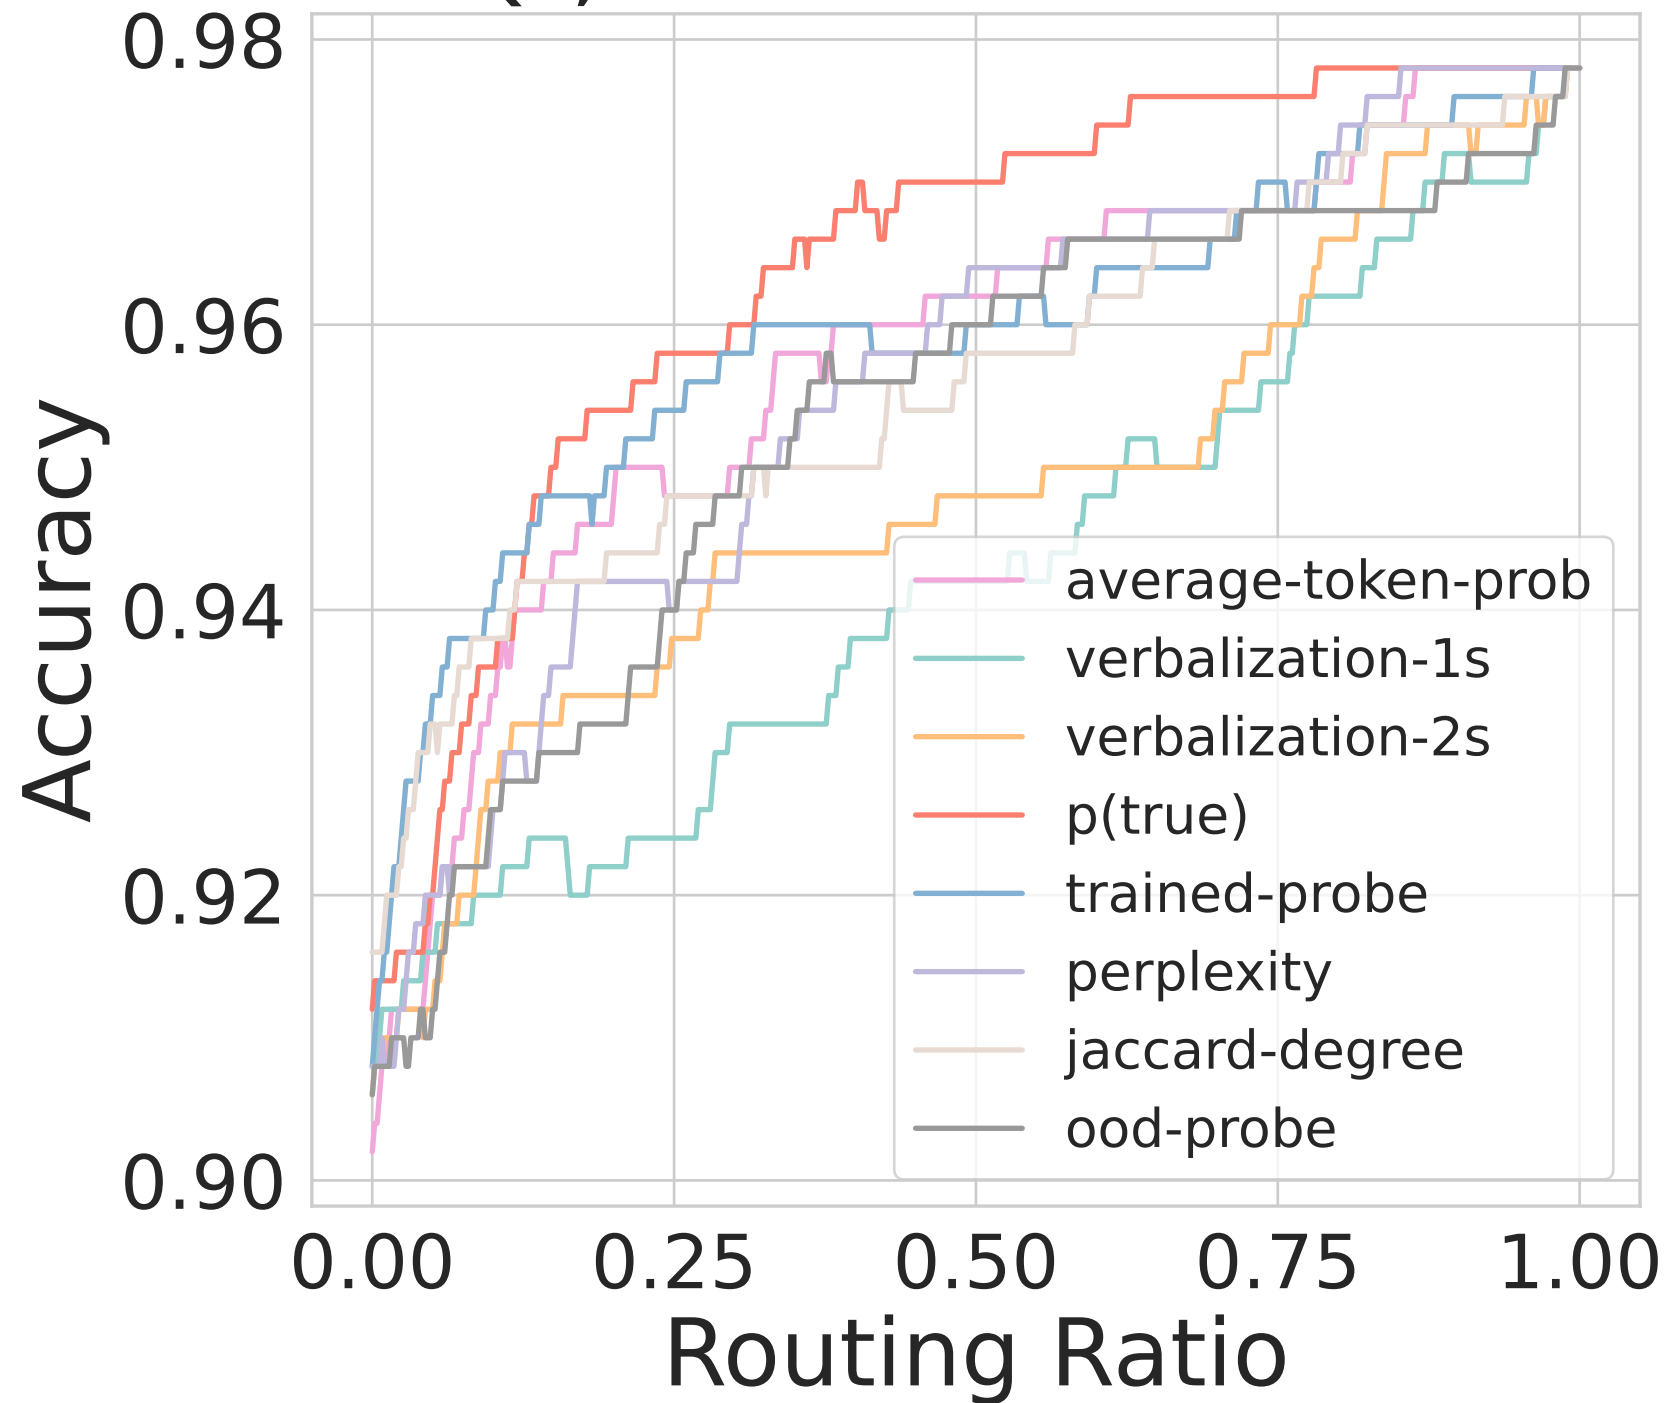

Supplement: supplementary_material [file rr_acc_co_qa_llama-3.2-3b_gpt41.pdf › Routing_SLM_LLMs/Uncertainty-based Routing/w_legend/to_gpt41/rr_acc_co_qa_llama-3.2-3b_gpt41.pdf]

**CoQA, mistral-7b to GPT-4.1 mini**

Accuracy

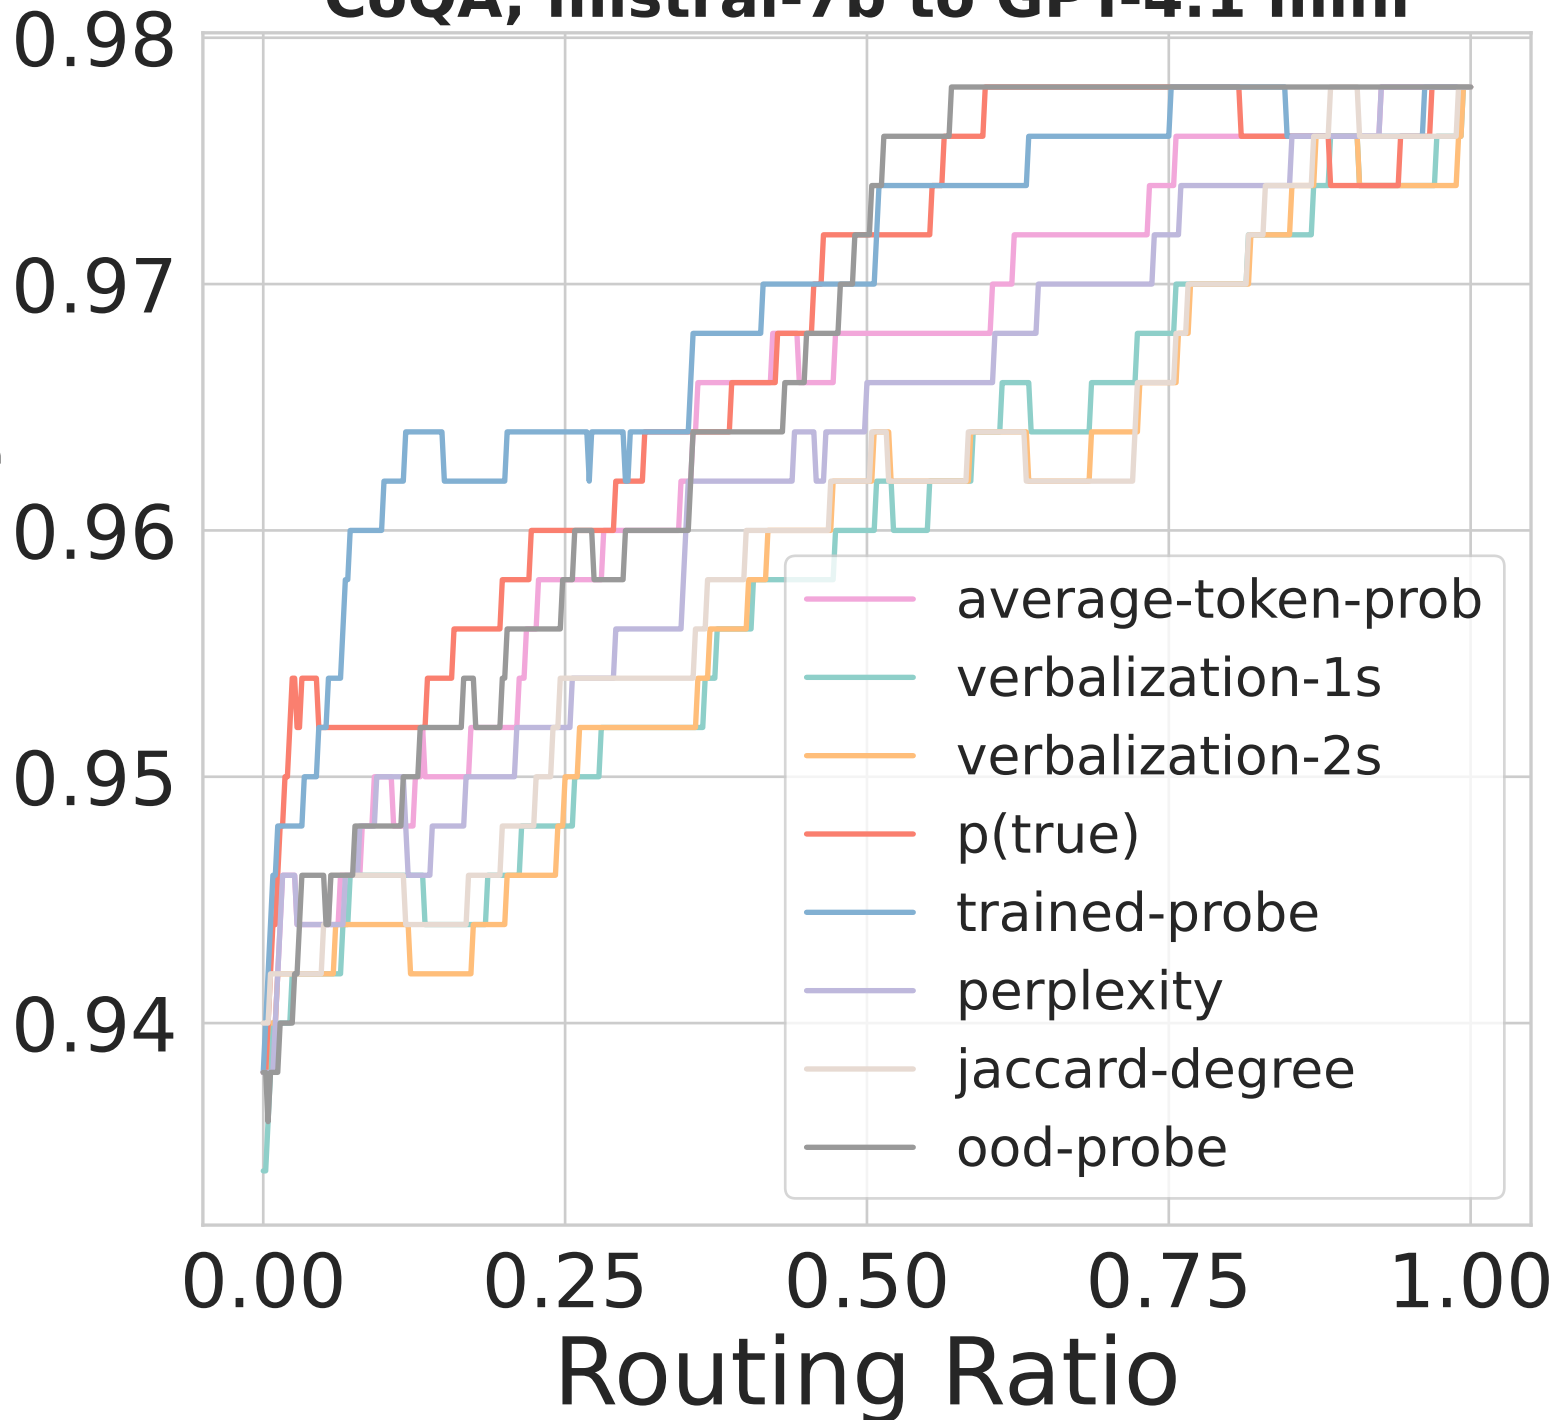

Supplement: supplementary_material [file rr_acc_co_qa_mistral-7b_gpt41.pdf › Routing_SLM_LLMs/Uncertainty-based Routing/w_legend/to_gpt41/rr_acc_co_qa_mistral-7b_gpt41.pdf]

CoQA, phi-3.5-mini to GPT-4.1 mini

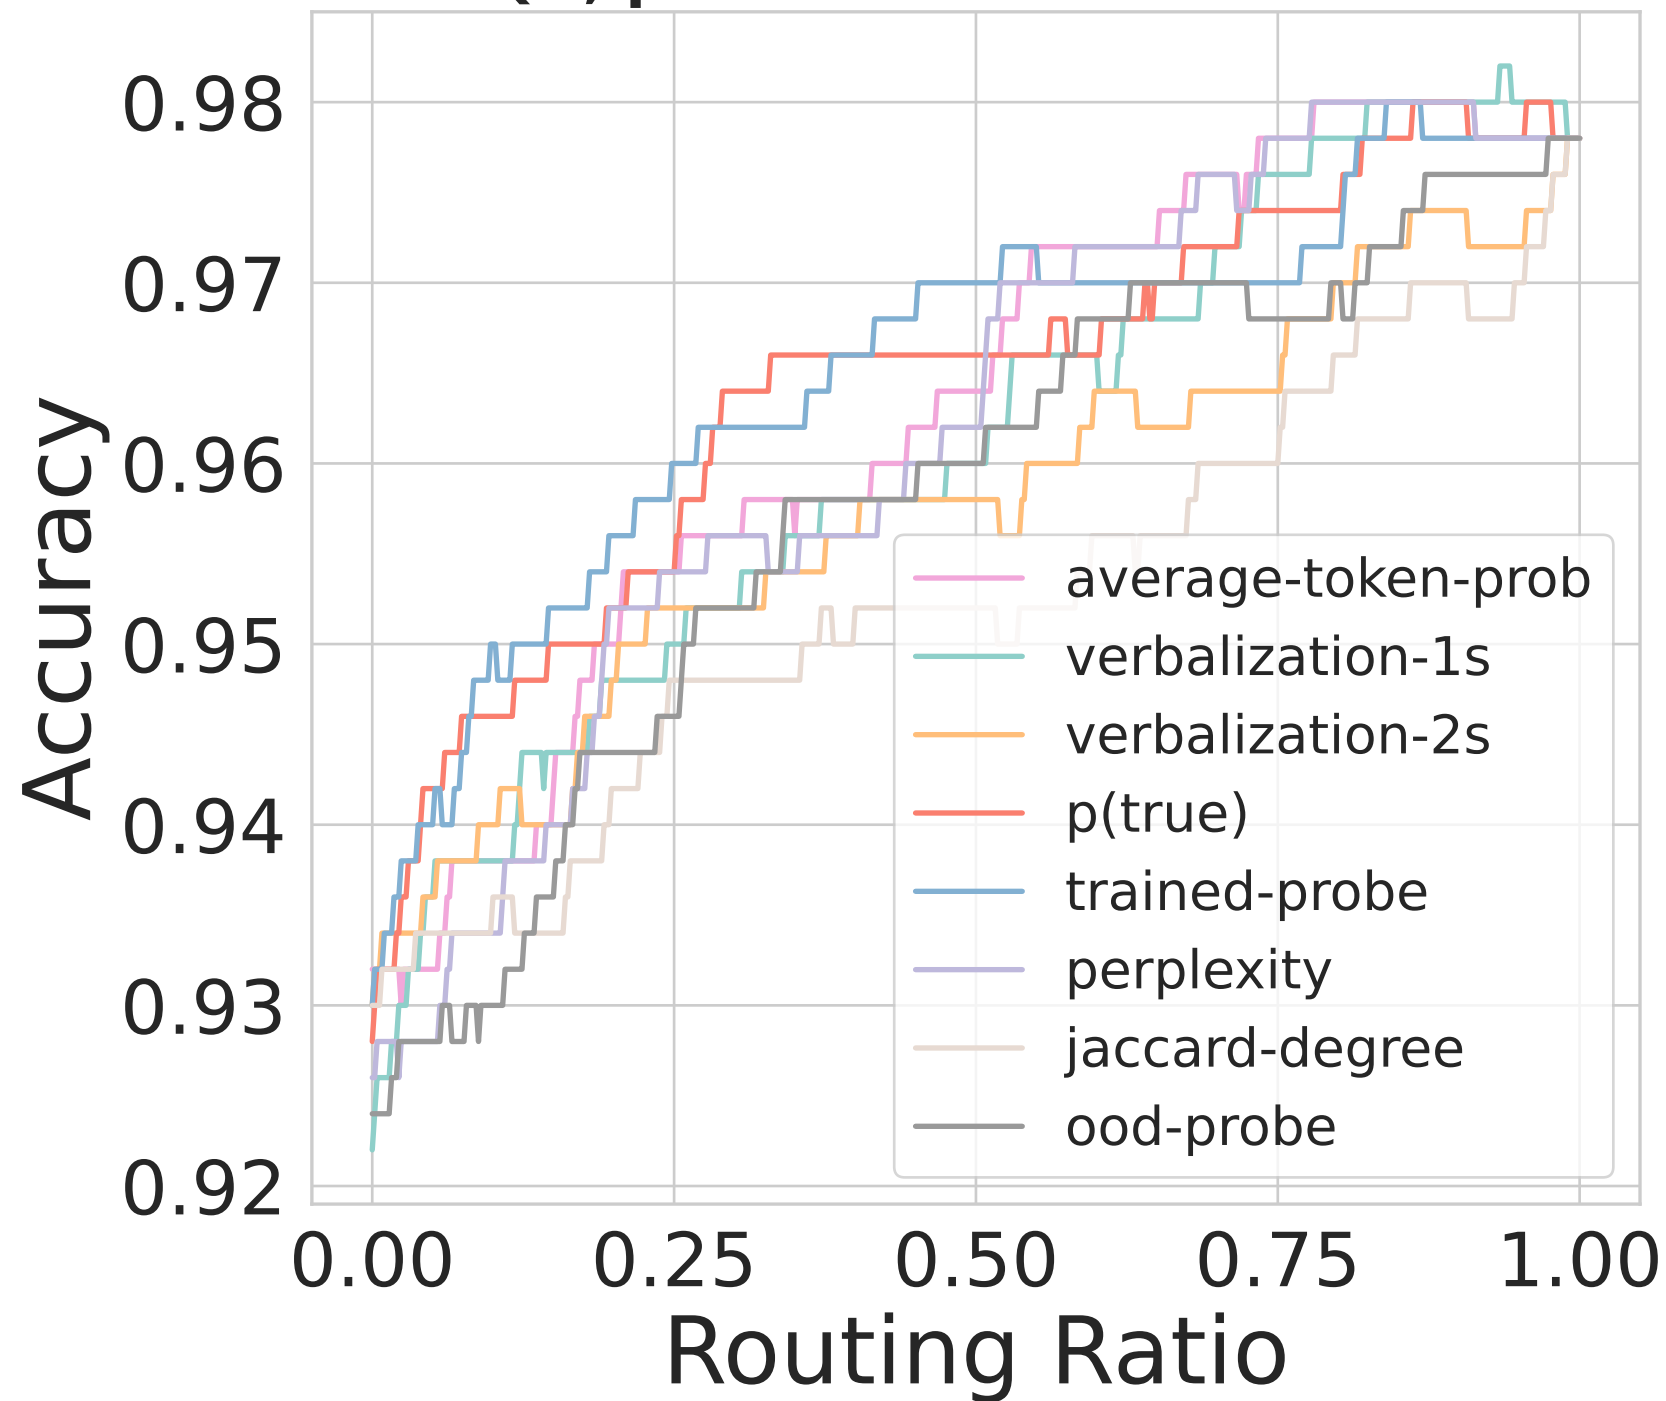

Supplement: supplementary_material [file rr_acc_co_qa_phi-3.5-mini_gpt41.pdf › Routing_SLM_LLMs/Uncertainty-based Routing/w_legend/to_gpt41/rr_acc_co_qa_phi-3.5-mini_gpt41.pdf]

## CoQA, phi-4-mini-reasoning to GPT-4.1 mini

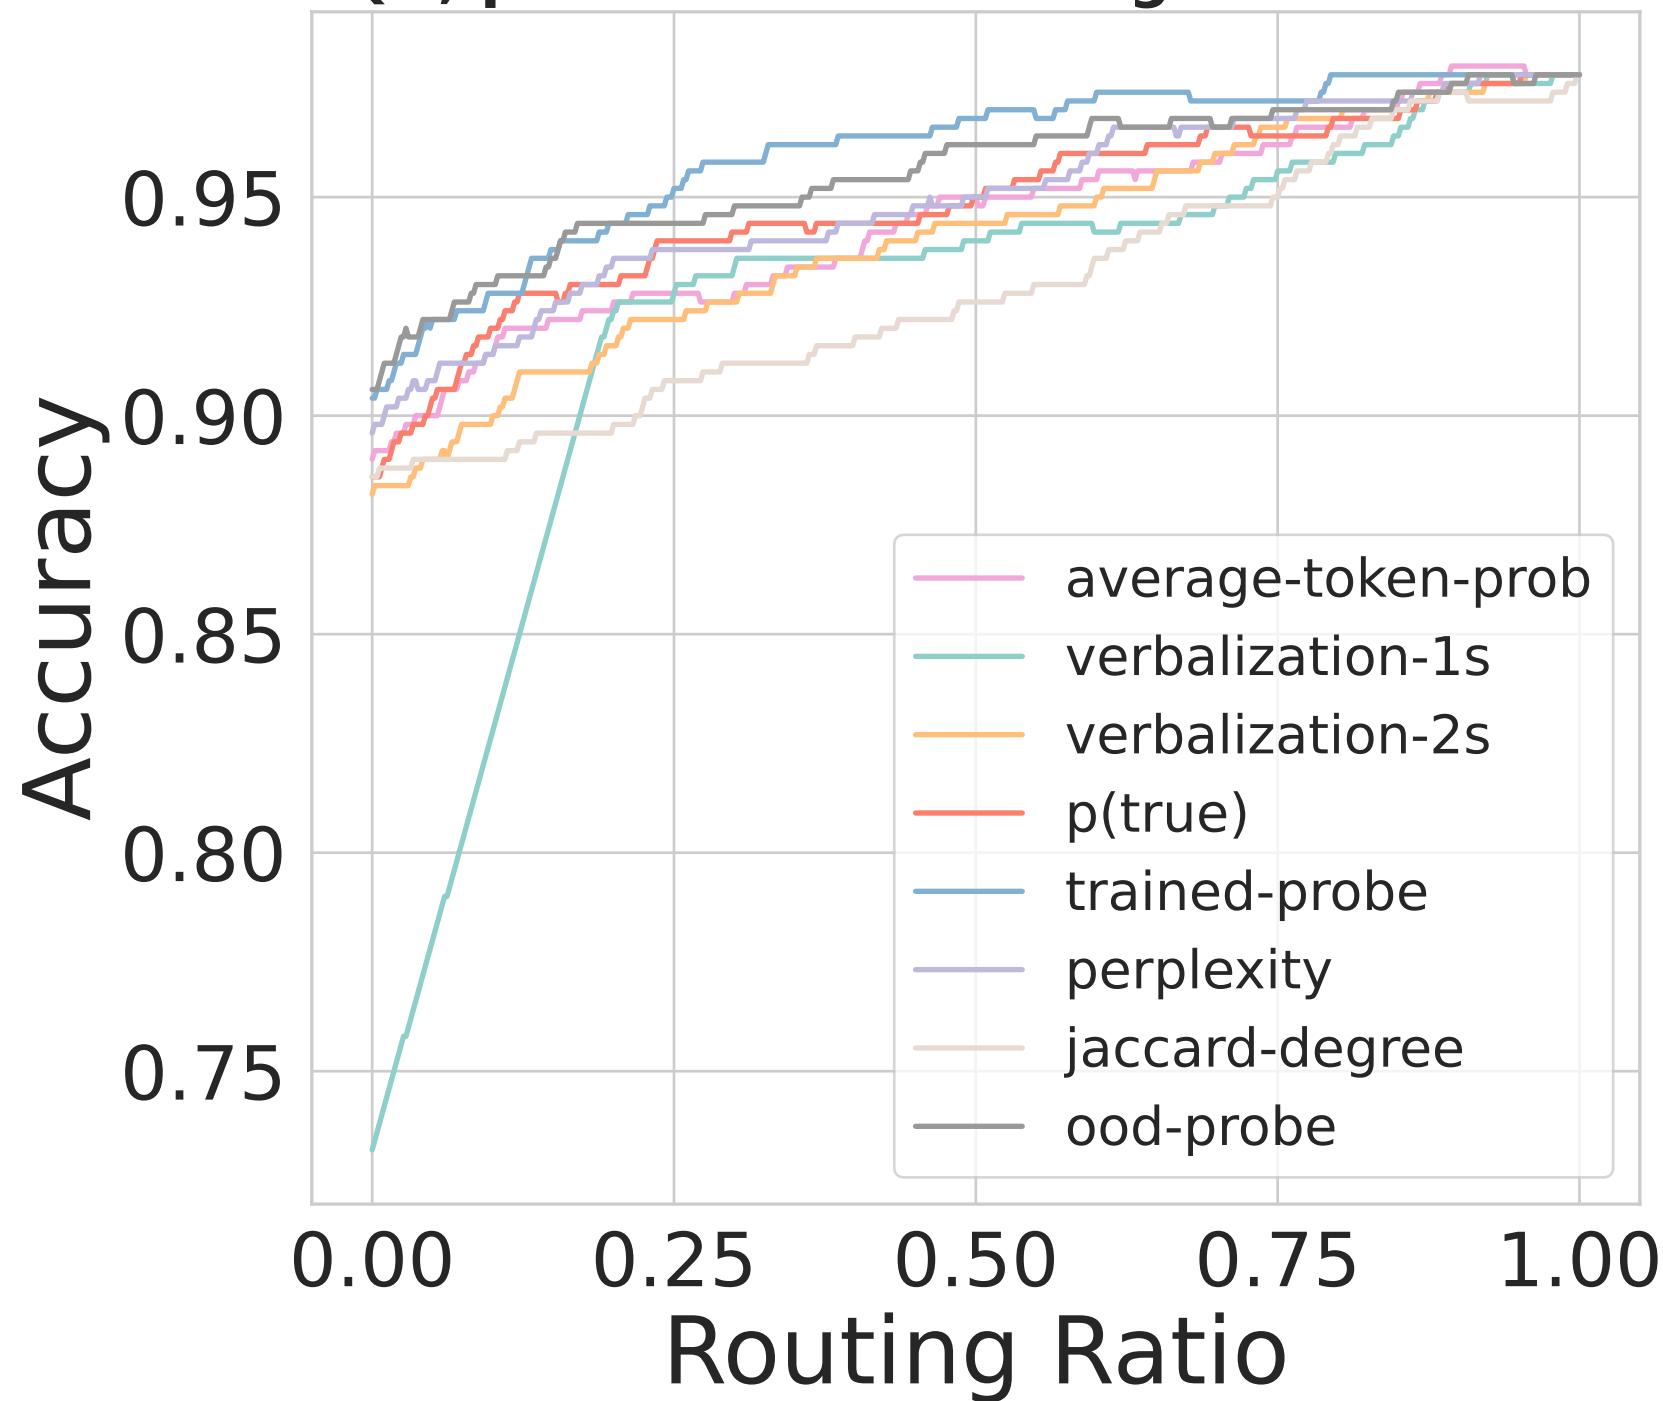

Supplement: supplementary_material [file rr_acc_co_qa_phi-4-mini-reasoning_gpt41.pdf › Routing_SLM_LLMs/Uncertainty-based Routing/w_legend/to_gpt41/rr_acc_co_qa_phi-4-mini-reasoning_gpt41.pdf]

CoQA, qwen-2.5-7b to GPT-4.1 mini

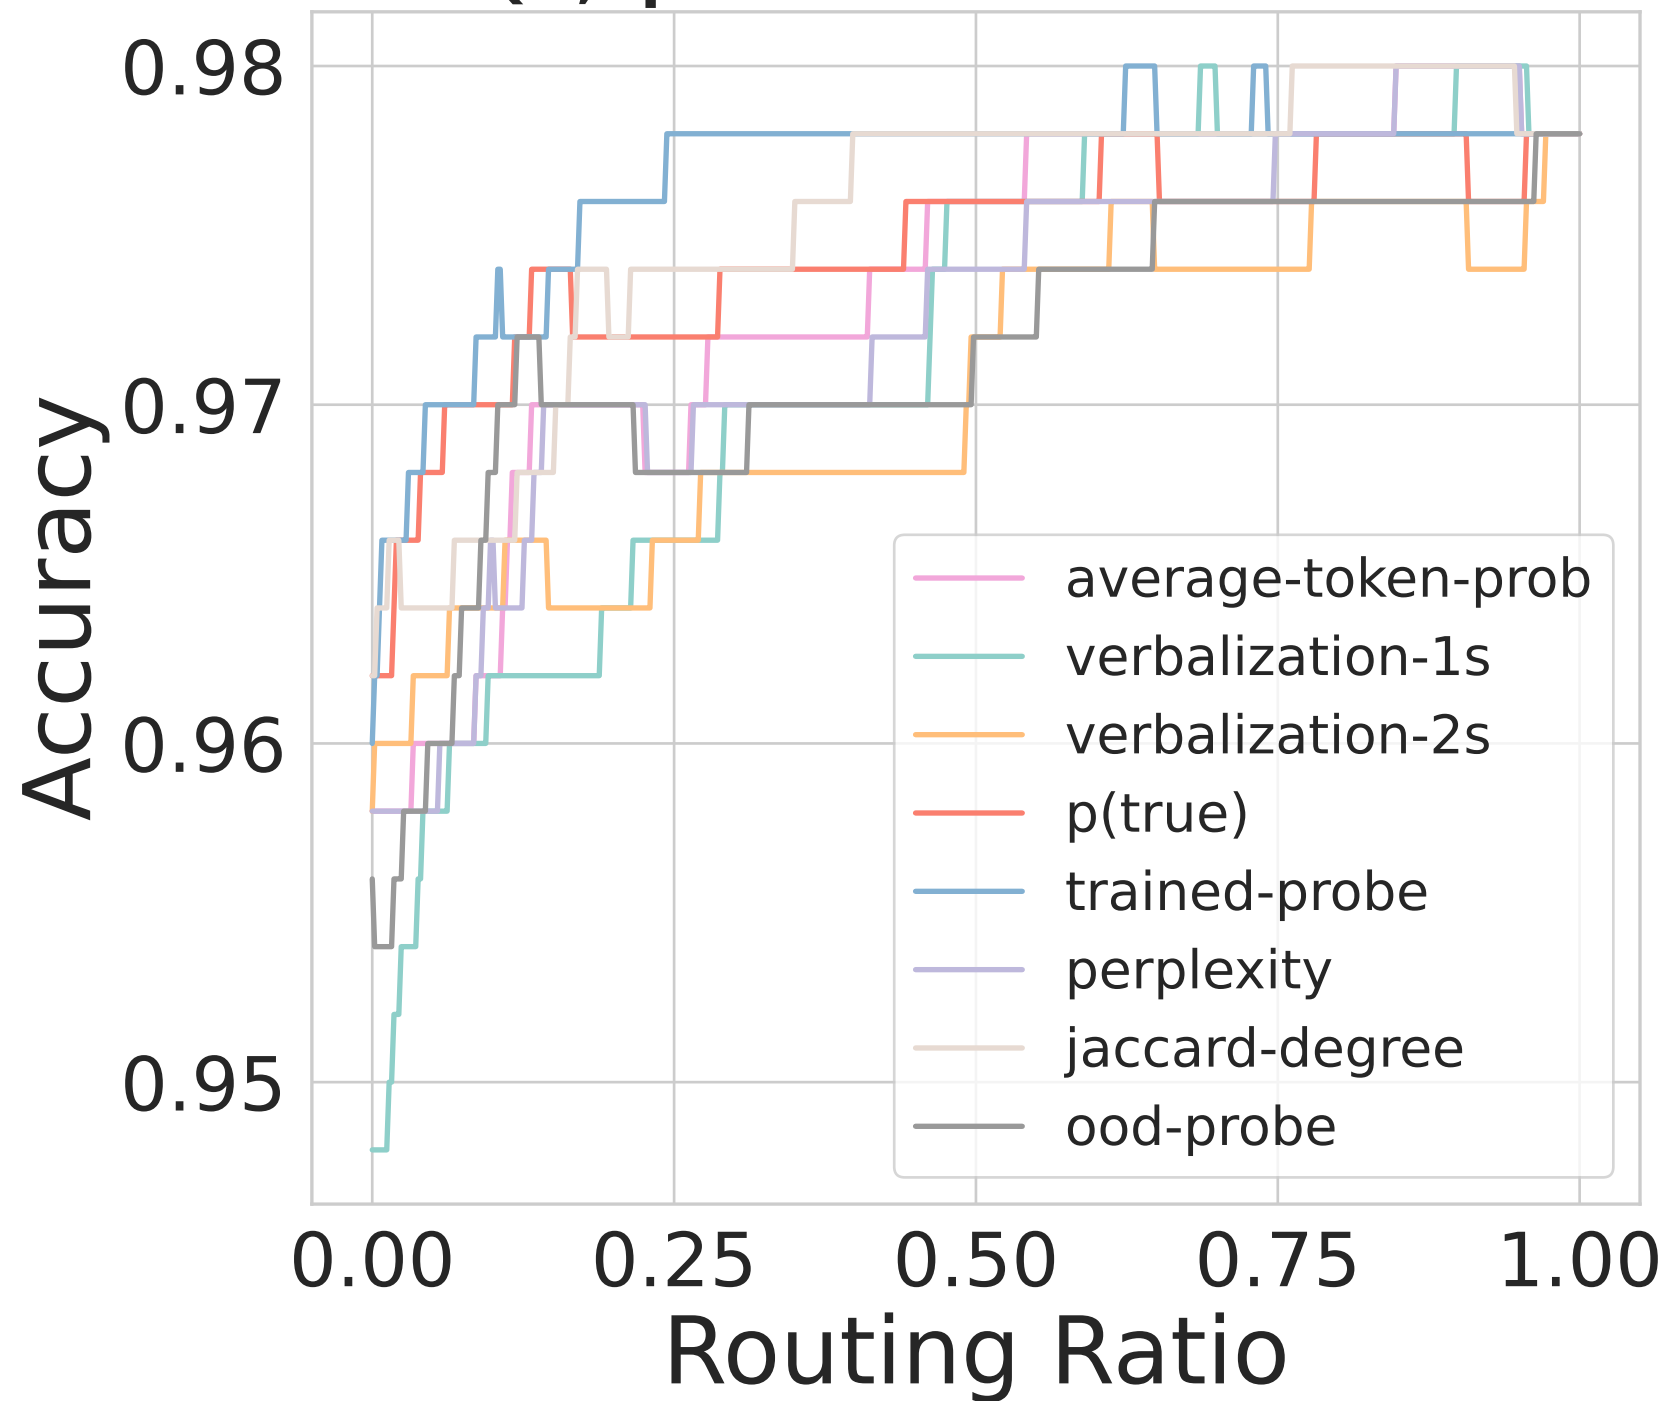

Supplement: supplementary_material [file rr_acc_co_qa_qwen-2.5-7b_gpt41.pdf › Routing_SLM_LLMs/Uncertainty-based Routing/w_legend/to_gpt41/rr_acc_co_qa_qwen-2.5-7b_gpt41.pdf]

## CoQA, rwkv to GPT-4.1 mini

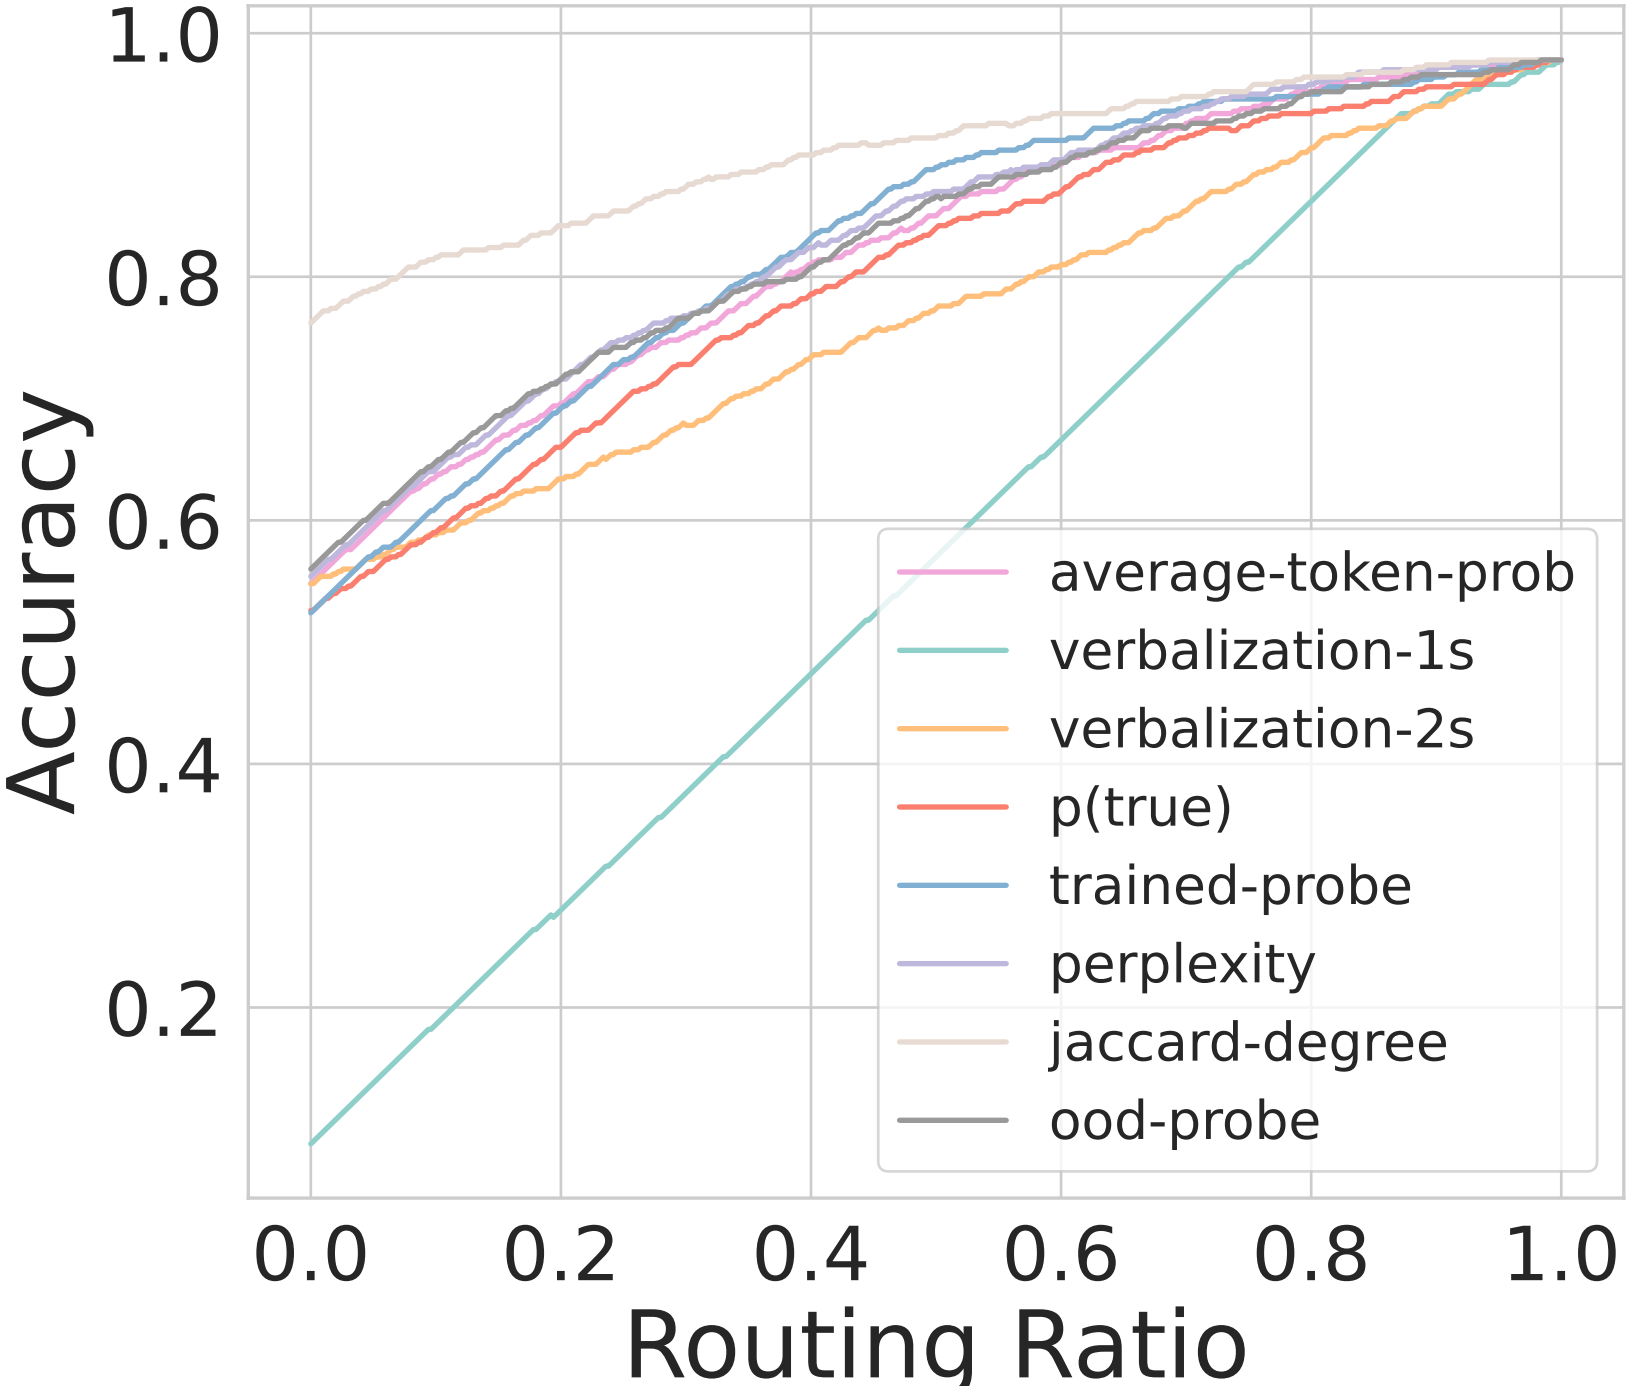

Supplement: supplementary_material [file rr_acc_co_qa_rwkv_gpt41.pdf › Routing_SLM_LLMs/Uncertainty-based Routing/w_legend/to_gpt41/rr_acc_co_qa_rwkv_gpt41.pdf]

# CommonsenseQA, Qwen3-0.6B to GPT-4.1 mini

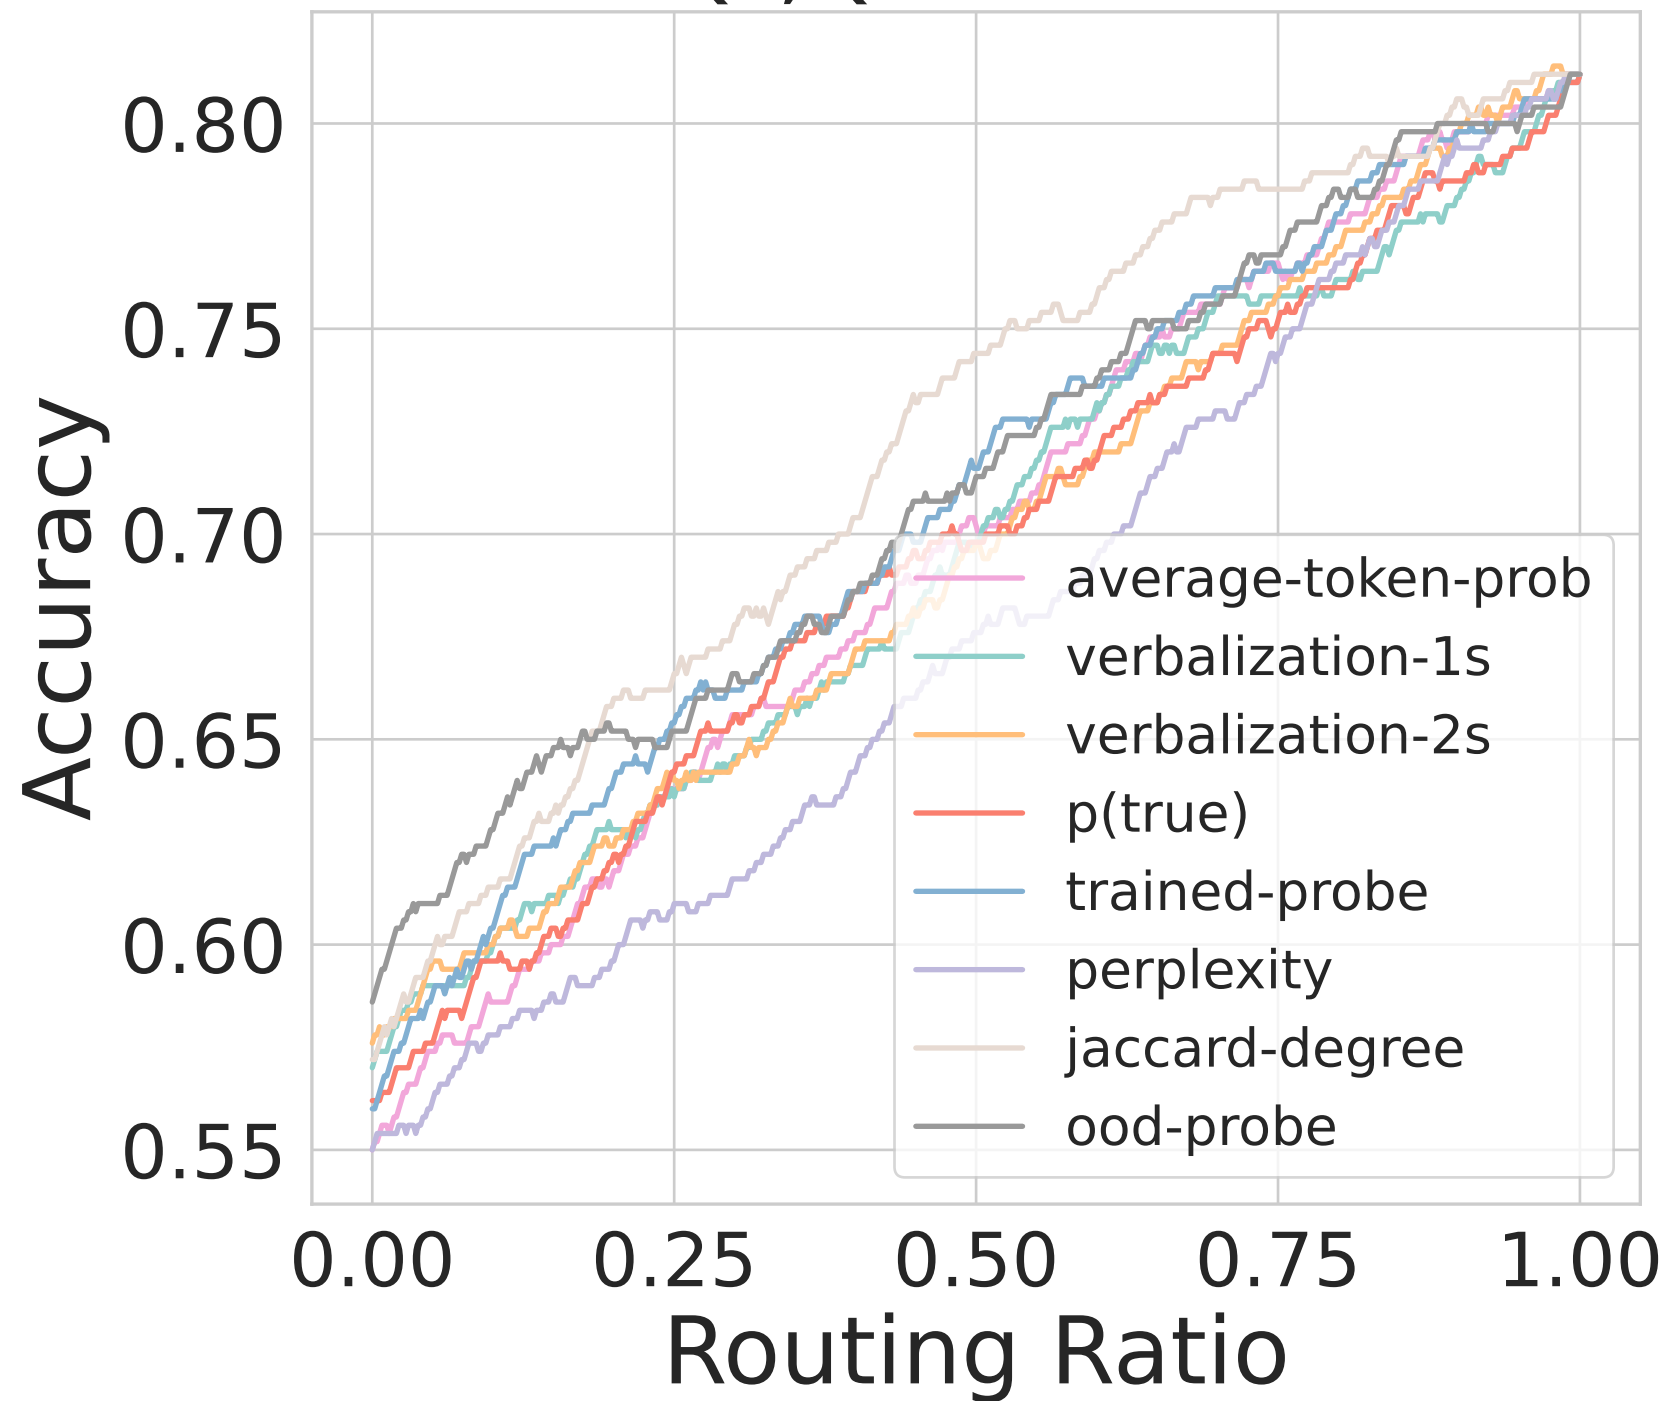

Supplement: supplementary_material [file rr_acc_commonsense_qa_Qwen3-0.6B_gpt41.pdf › Routing_SLM_LLMs/Uncertainty-based Routing/w_legend/to_gpt41/rr_acc_commonsense_qa_Qwen3-0.6B_gpt41.pdf]

# CommonsenseQA, Qwen3-4B to GPT-4.1 mini

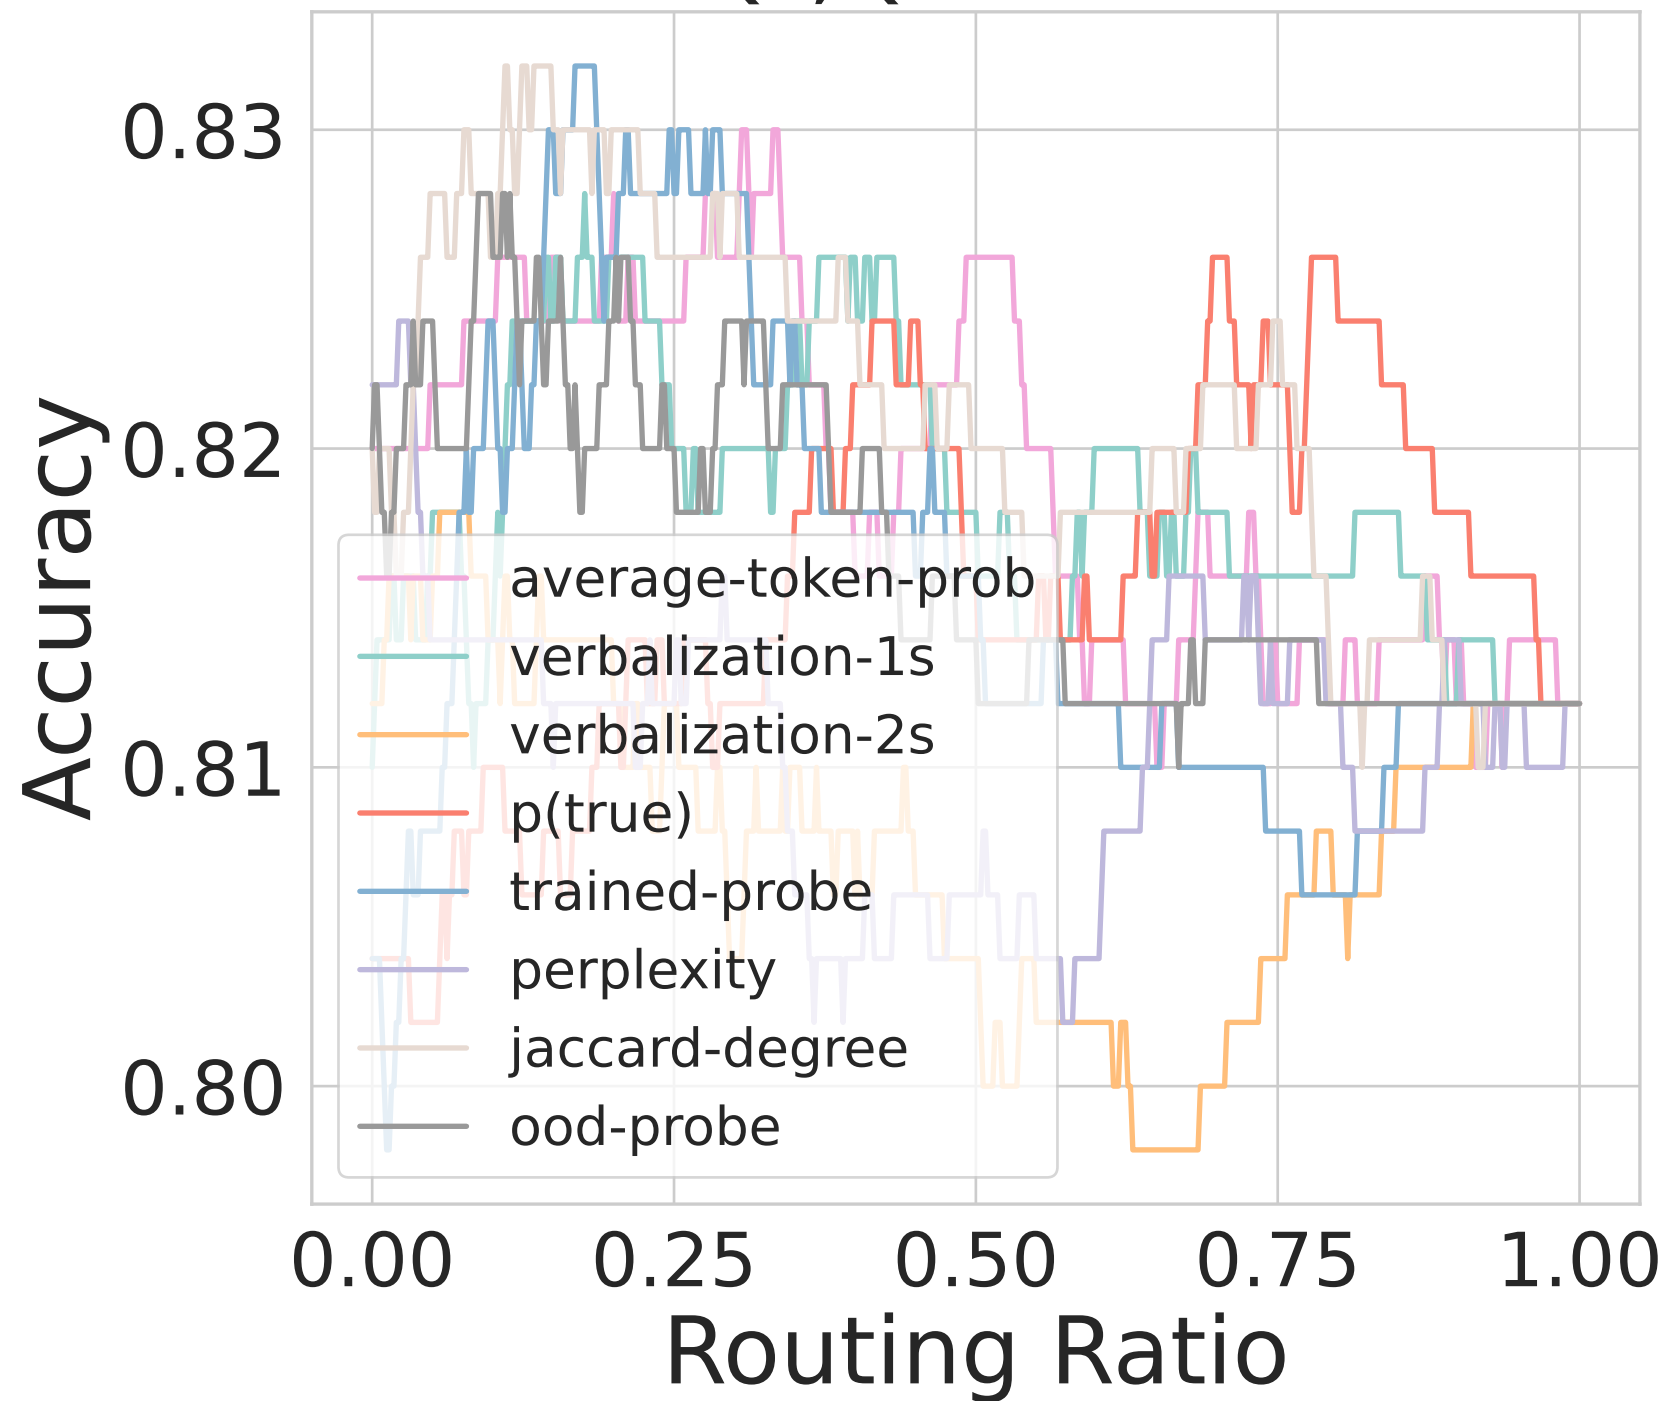

Supplement: supplementary_material [file rr_acc_commonsense_qa_Qwen3-4B_gpt41.pdf › Routing_SLM_LLMs/Uncertainty-based Routing/w_legend/to_gpt41/rr_acc_commonsense_qa_Qwen3-4B_gpt41.pdf]

# CommonsenseQA, granite-3.1-8b to GPT-4.1 mini

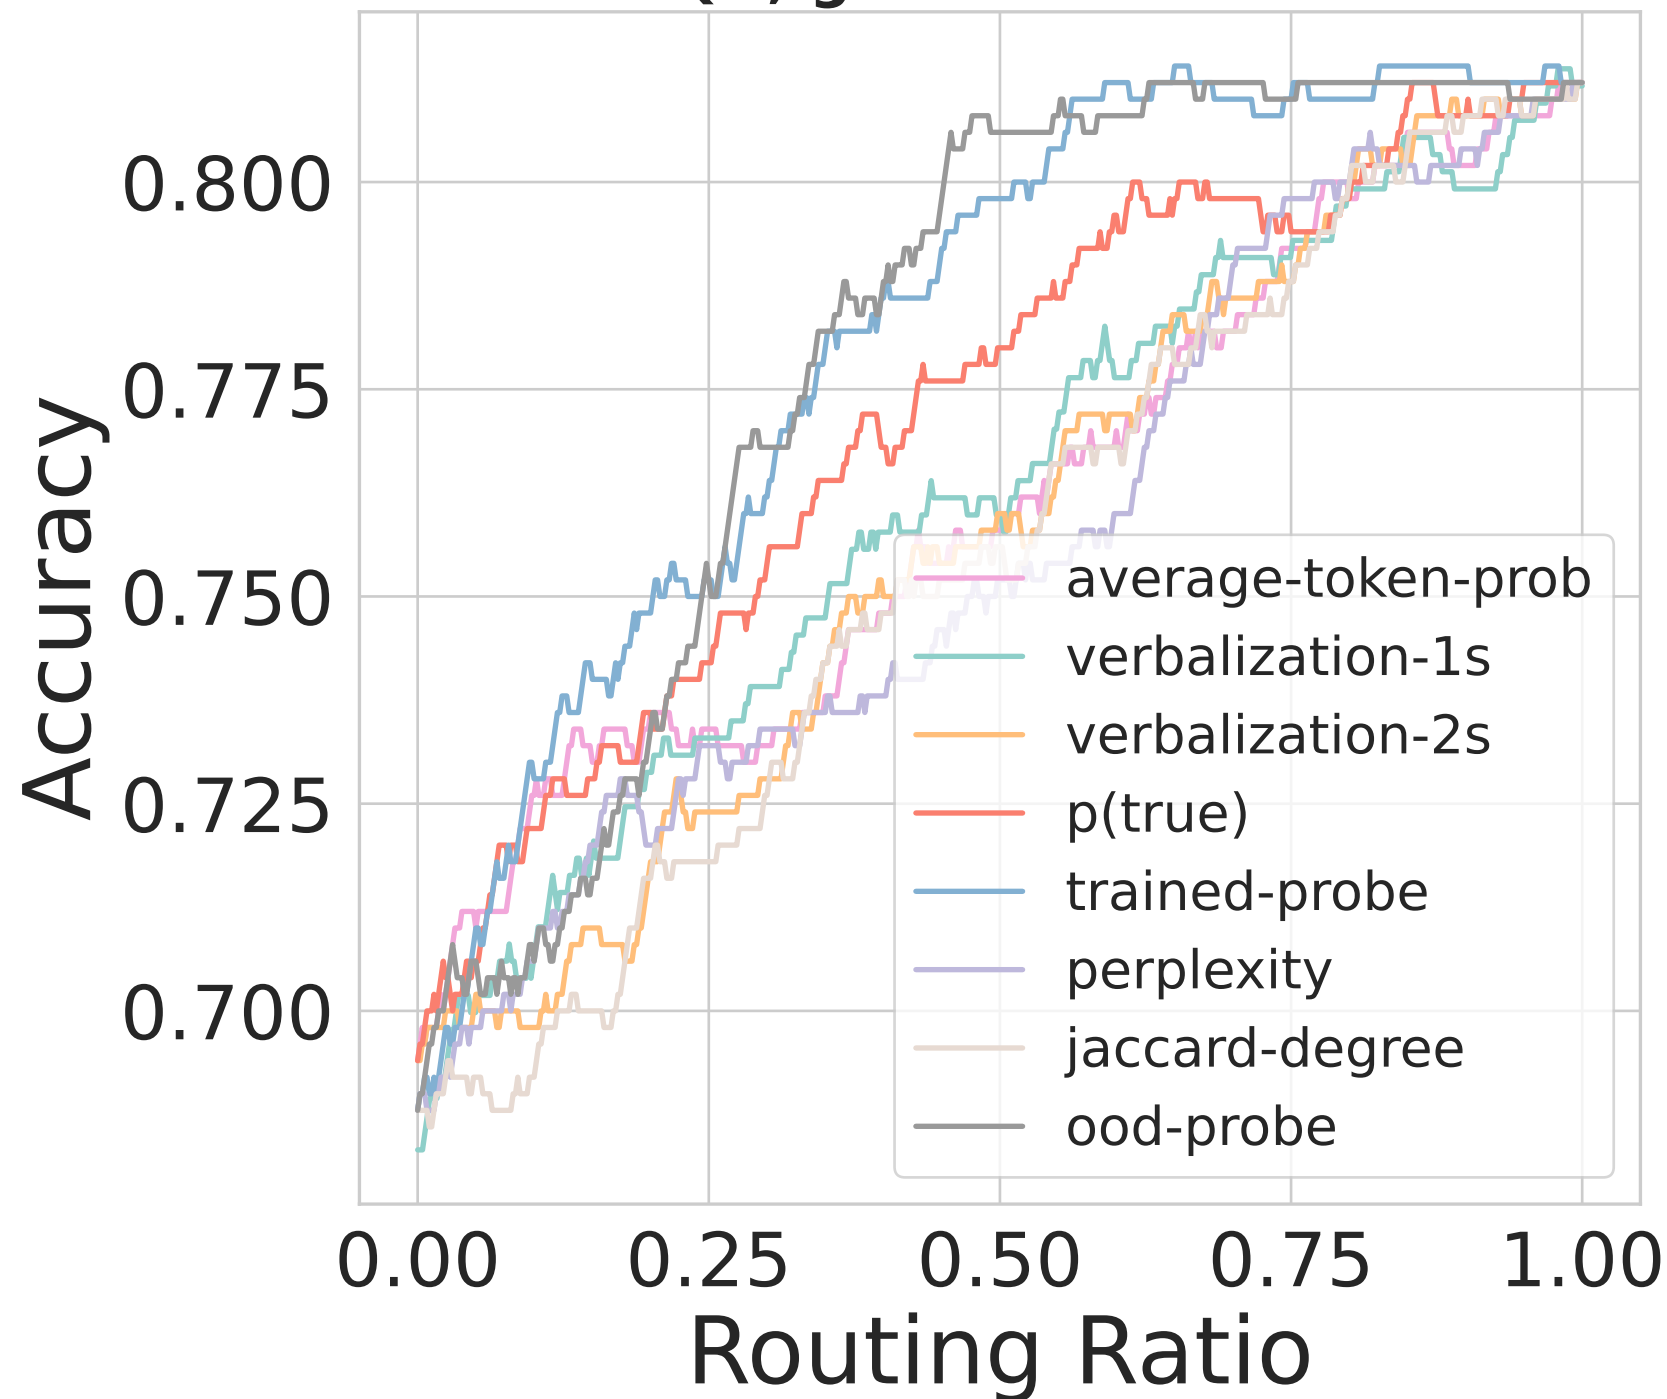

Supplement: supplementary_material [file rr_acc_commonsense_qa_granite-3.1-8b_gpt41.pdf › Routing_SLM_LLMs/Uncertainty-based Routing/w_legend/to_gpt41/rr_acc_commonsense_qa_granite-3.1-8b_gpt41.pdf]

# CommonsenseQA, llama-3.1-8b to GPT-4.1 mini

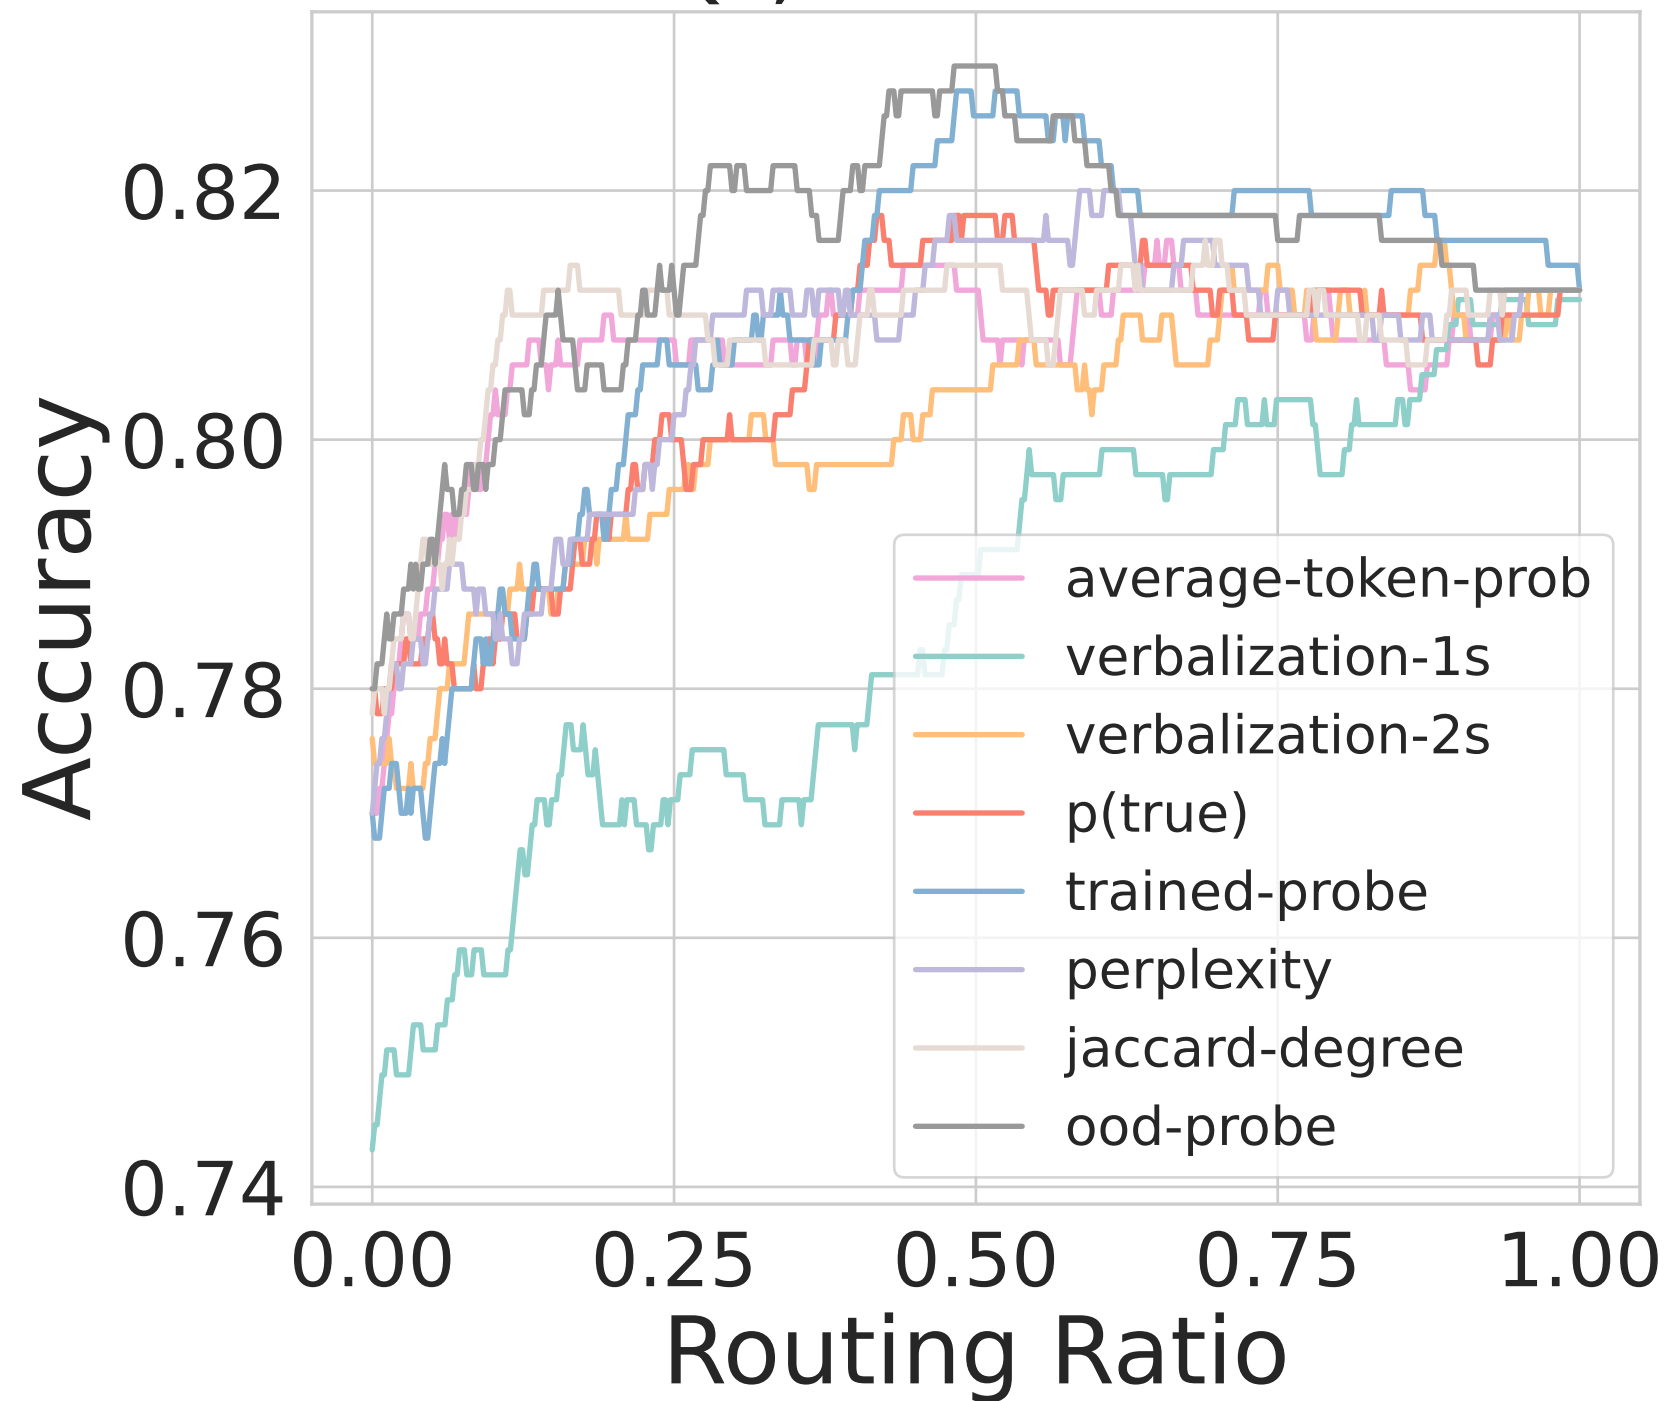

Supplement: supplementary_material [file rr_acc_commonsense_qa_llama-3.1-8b_gpt41.pdf › Routing_SLM_LLMs/Uncertainty-based Routing/w_legend/to_gpt41/rr_acc_commonsense_qa_llama-3.1-8b_gpt41.pdf]

## CommonsenseQA, llama-3.2-1b to GPT-4.1 mini

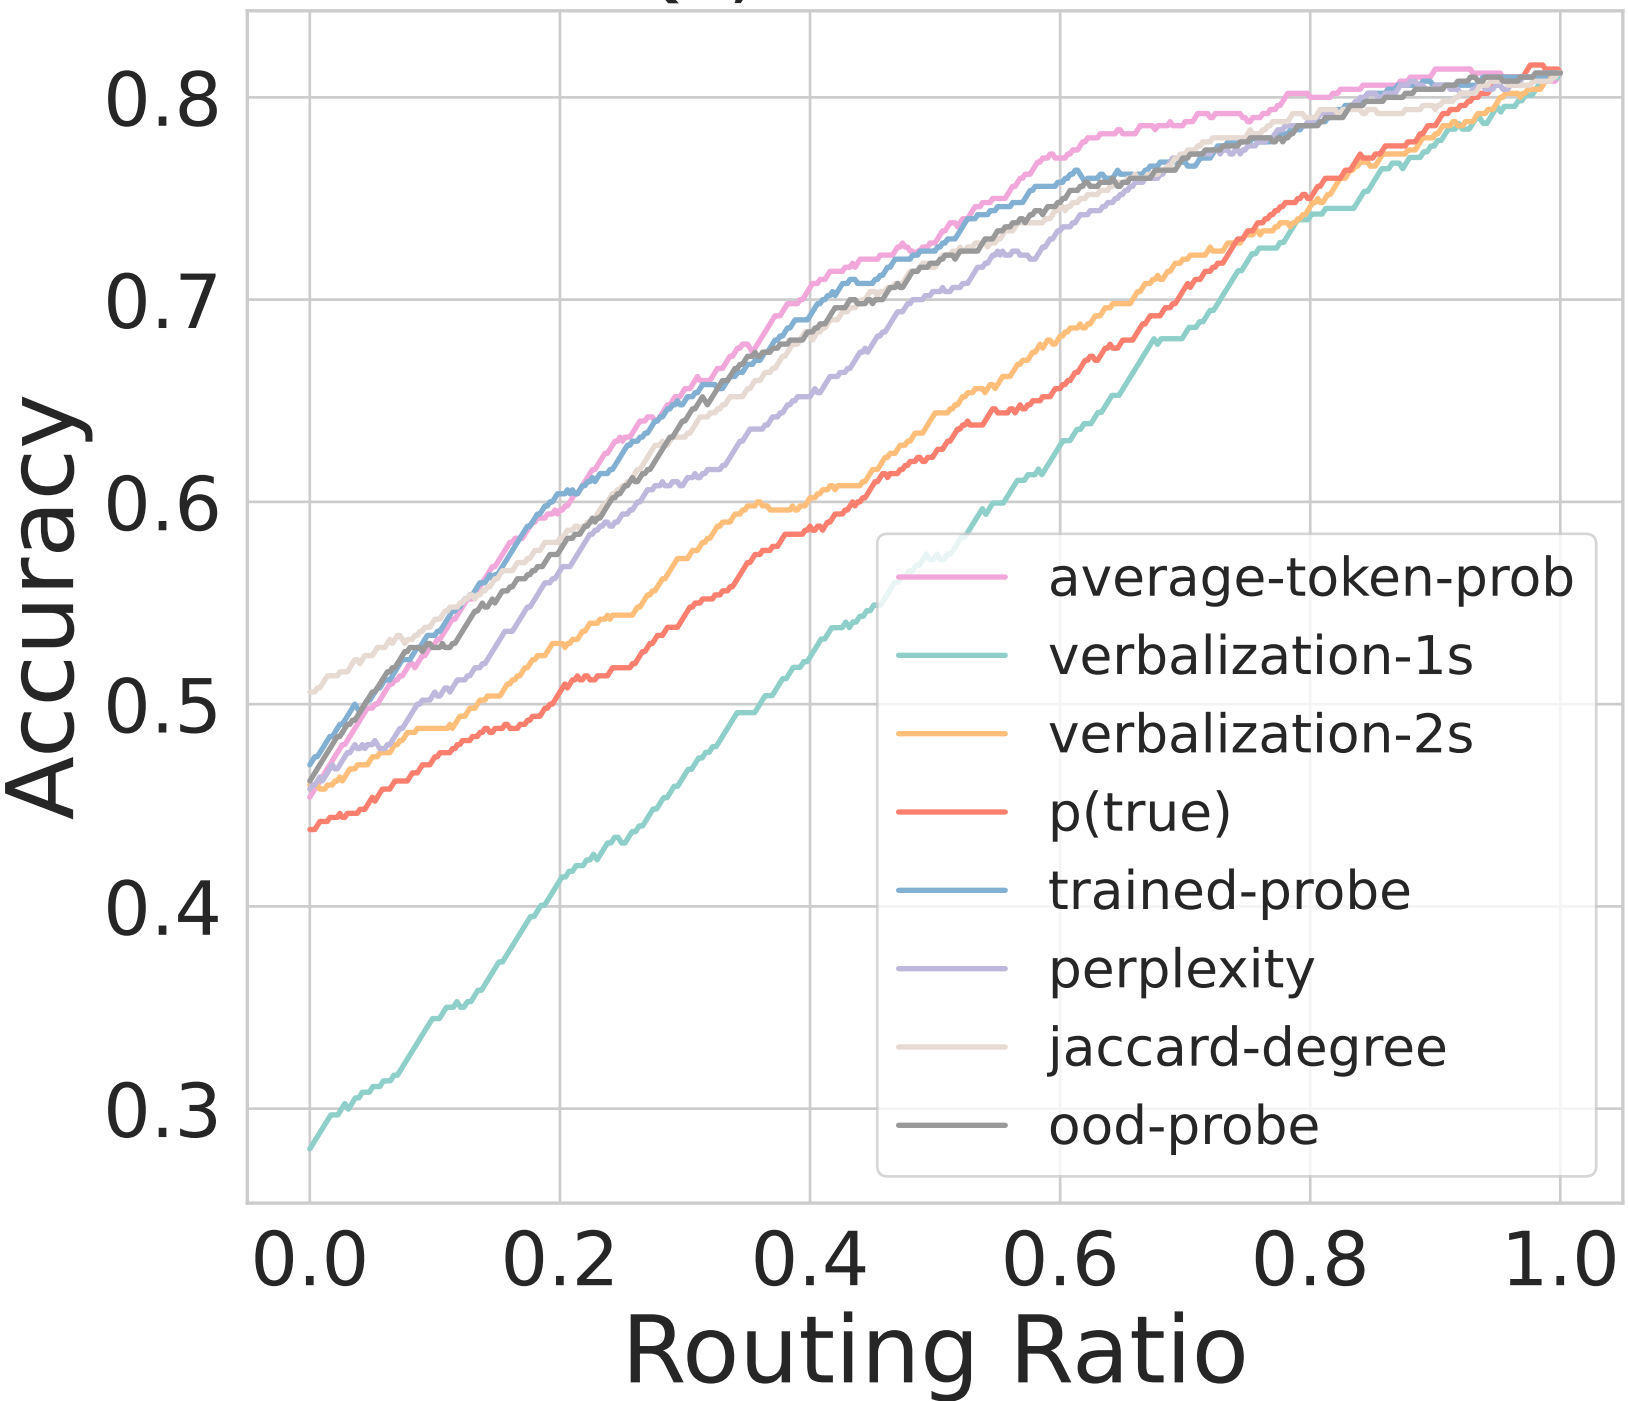

Supplement: supplementary_material [file rr_acc_commonsense_qa_llama-3.2-1b_gpt41.pdf › Routing_SLM_LLMs/Uncertainty-based Routing/w_legend/to_gpt41/rr_acc_commonsense_qa_llama-3.2-1b_gpt41.pdf]

# CommonsenseQA, llama-3.2-3b to GPT-4.1 mini

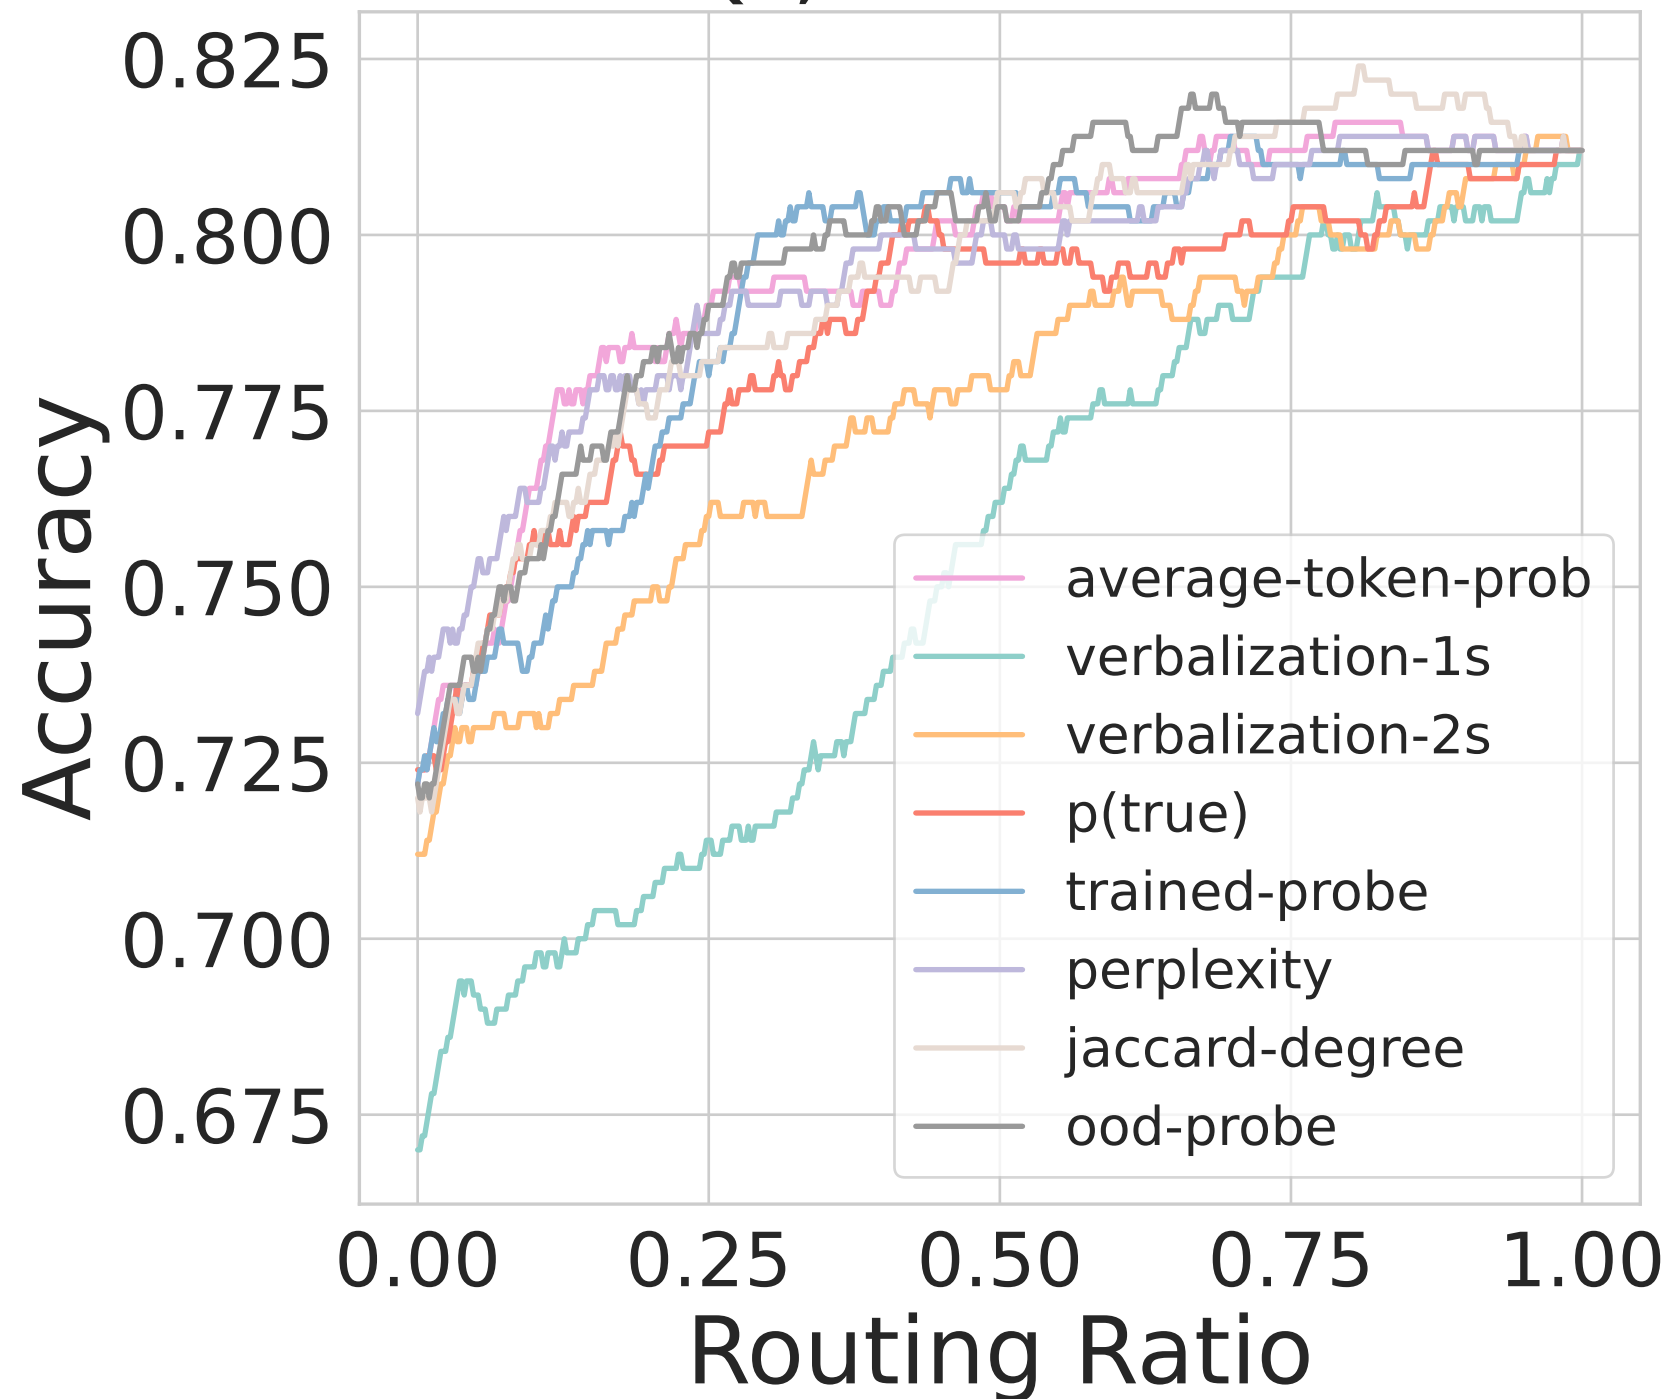

Supplement: supplementary_material [file rr_acc_commonsense_qa_llama-3.2-3b_gpt41.pdf › Routing_SLM_LLMs/Uncertainty-based Routing/w_legend/to_gpt41/rr_acc_commonsense_qa_llama-3.2-3b_gpt41.pdf]

# CommonsenseQA, mistral-7b to GPT-4.1 mini

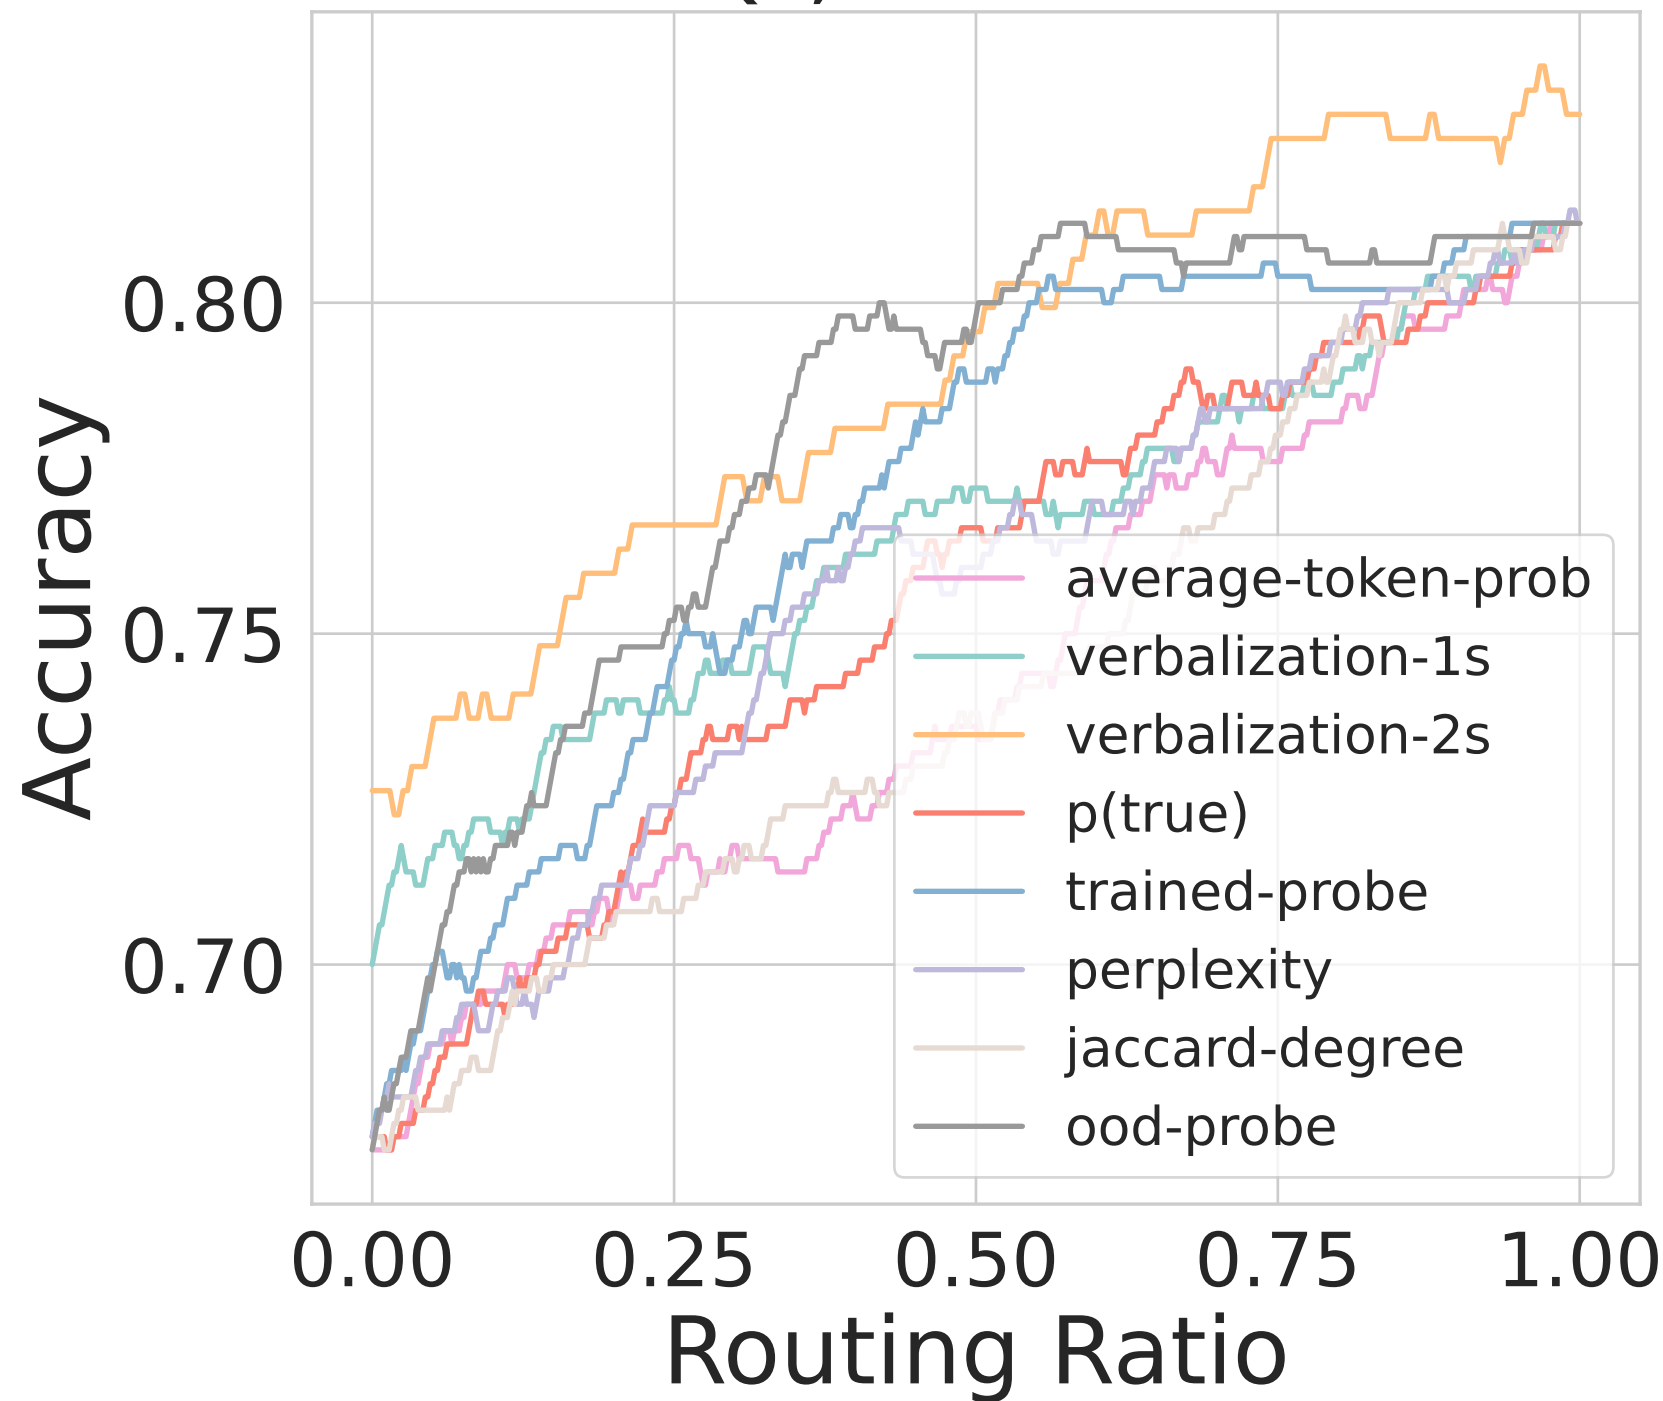

Supplement: supplementary_material [file rr_acc_commonsense_qa_mistral-7b_gpt41.pdf › Routing_SLM_LLMs/Uncertainty-based Routing/w_legend/to_gpt41/rr_acc_commonsense_qa_mistral-7b_gpt41.pdf]

# CommonsenseQA, phi-4-mini-reasoning to GPT-4.1 mini

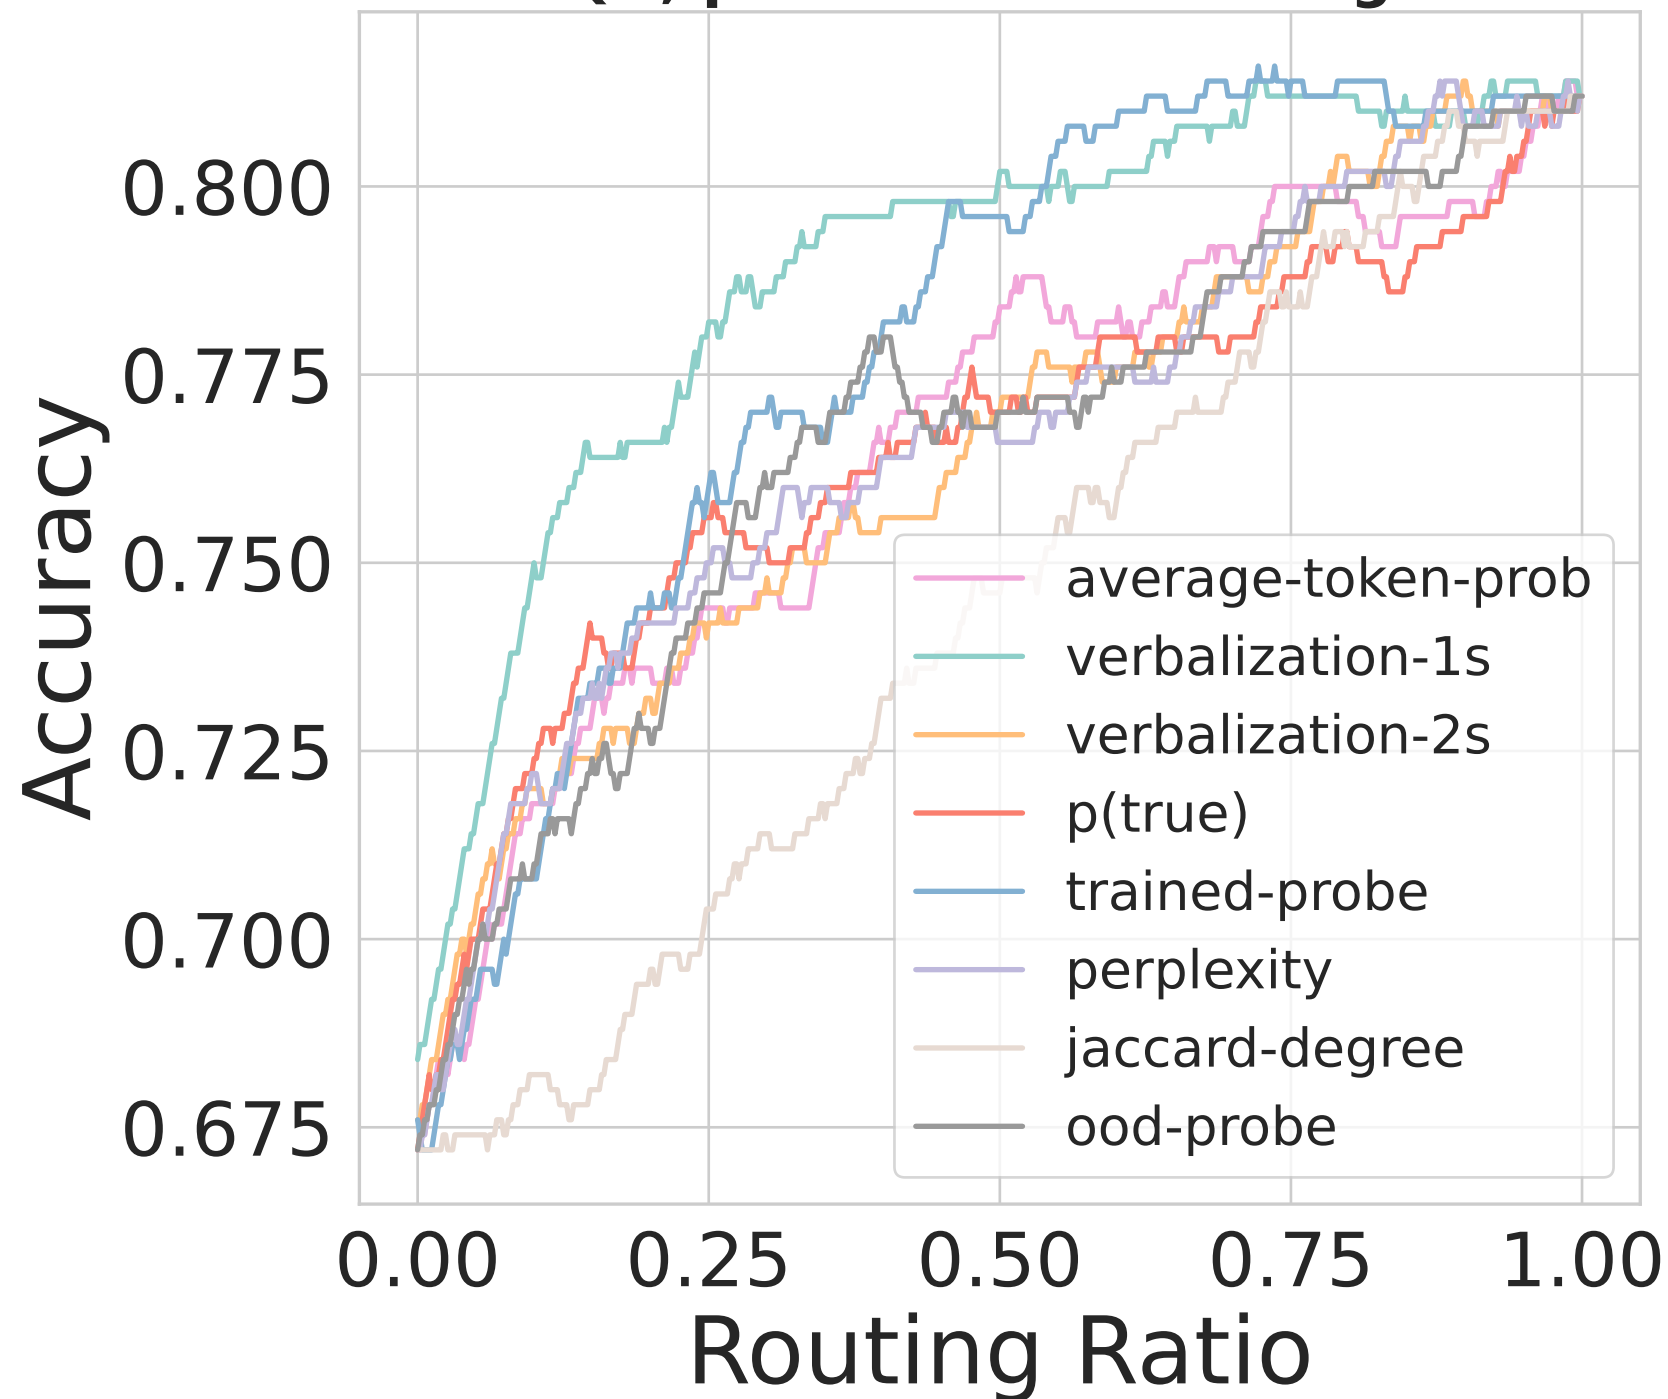

Supplement: supplementary_material [file rr_acc_commonsense_qa_phi-4-mini-reasoning_gpt41.pdf › Routing_SLM_LLMs/Uncertainty-based Routing/w_legend/to_gpt41/rr_acc_commonsense_qa_phi-4-mini-reasoning_gpt41.pdf]

## CommonsenseQA, rwkv to GPT-4.1 mini

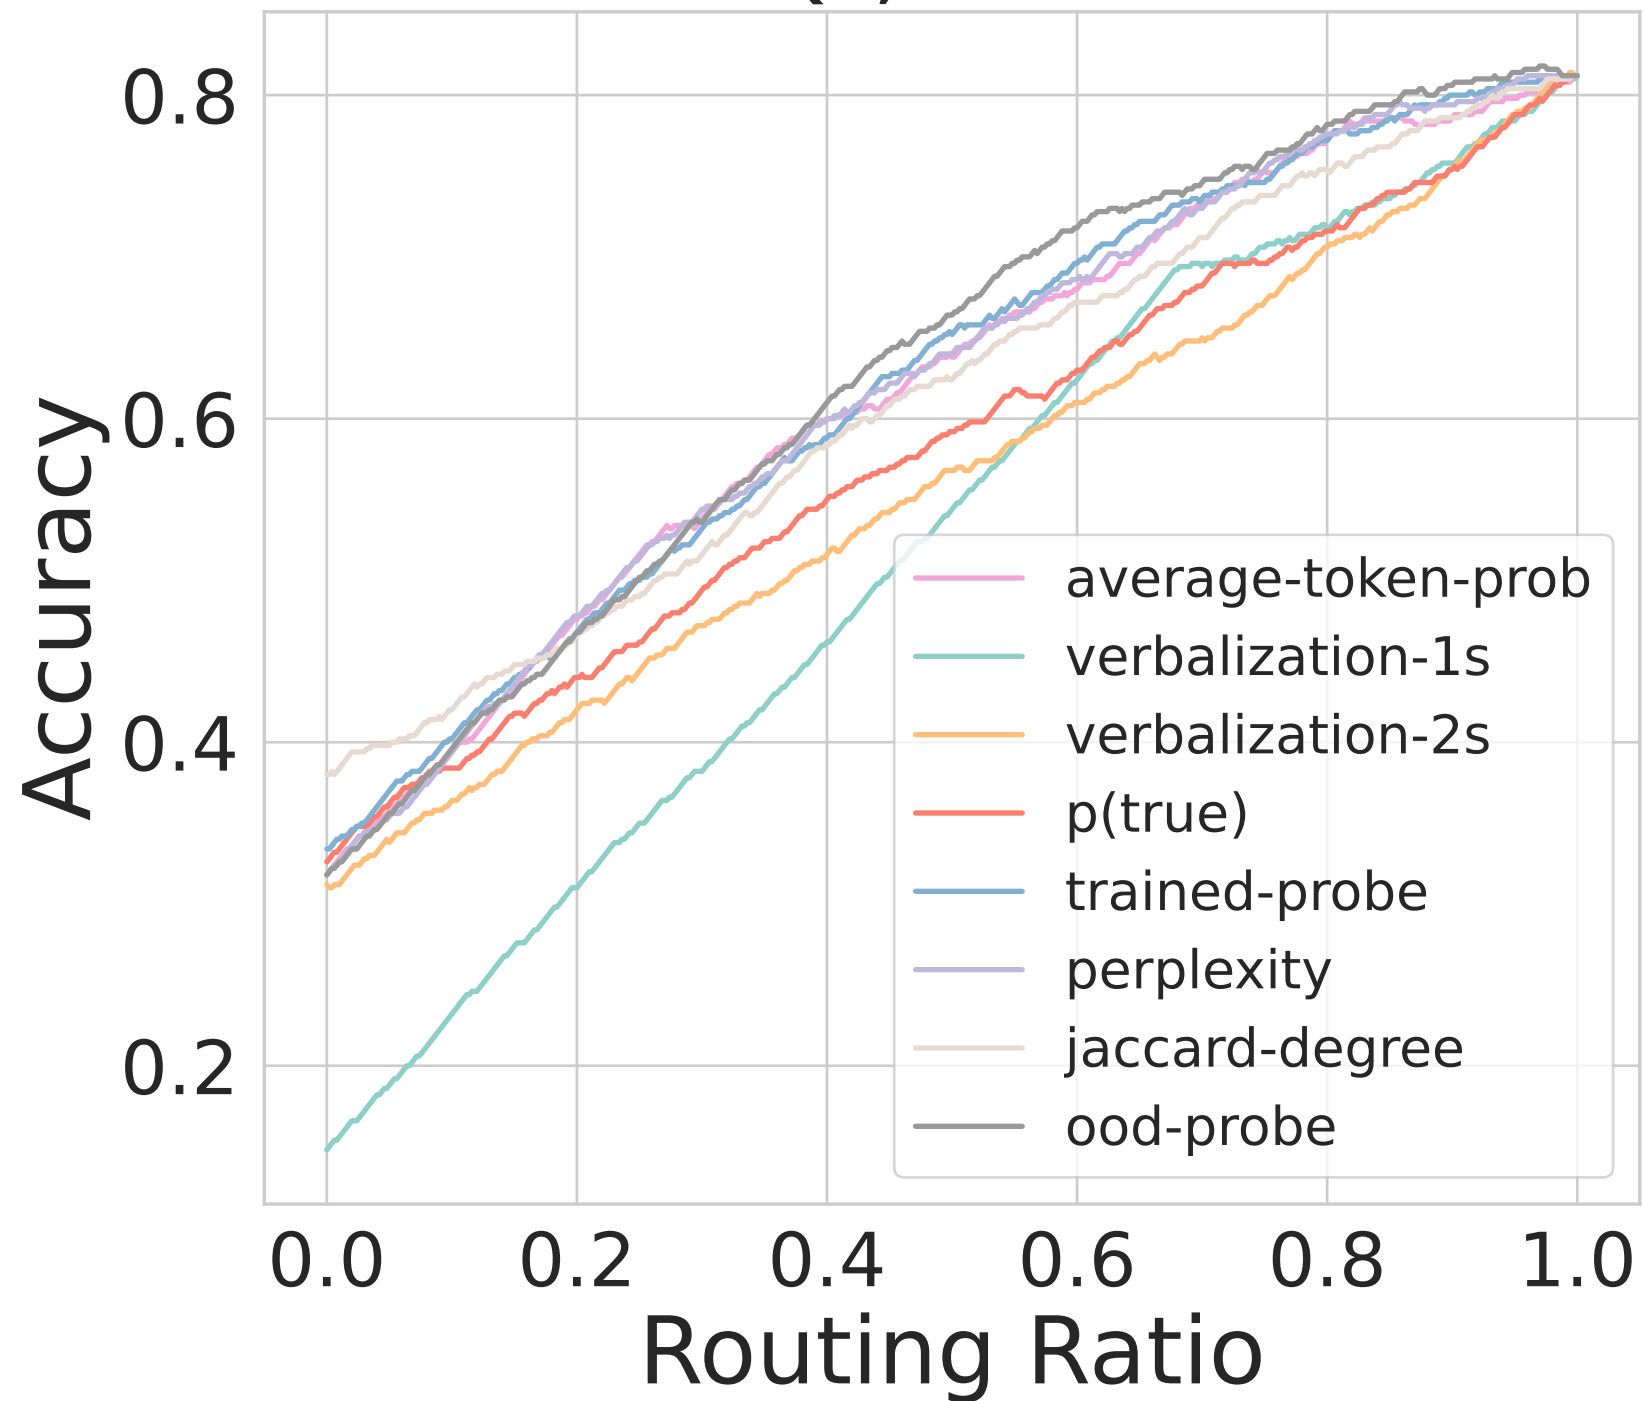

Supplement: supplementary_material [file rr_acc_commonsense_qa_rwkv_gpt41.pdf › Routing_SLM_LLMs/Uncertainty-based Routing/w_legend/to_gpt41/rr_acc_commonsense_qa_rwkv_gpt41.pdf]

**GSM8K, Qwen3-0.6B to GPT-4.1 mini**

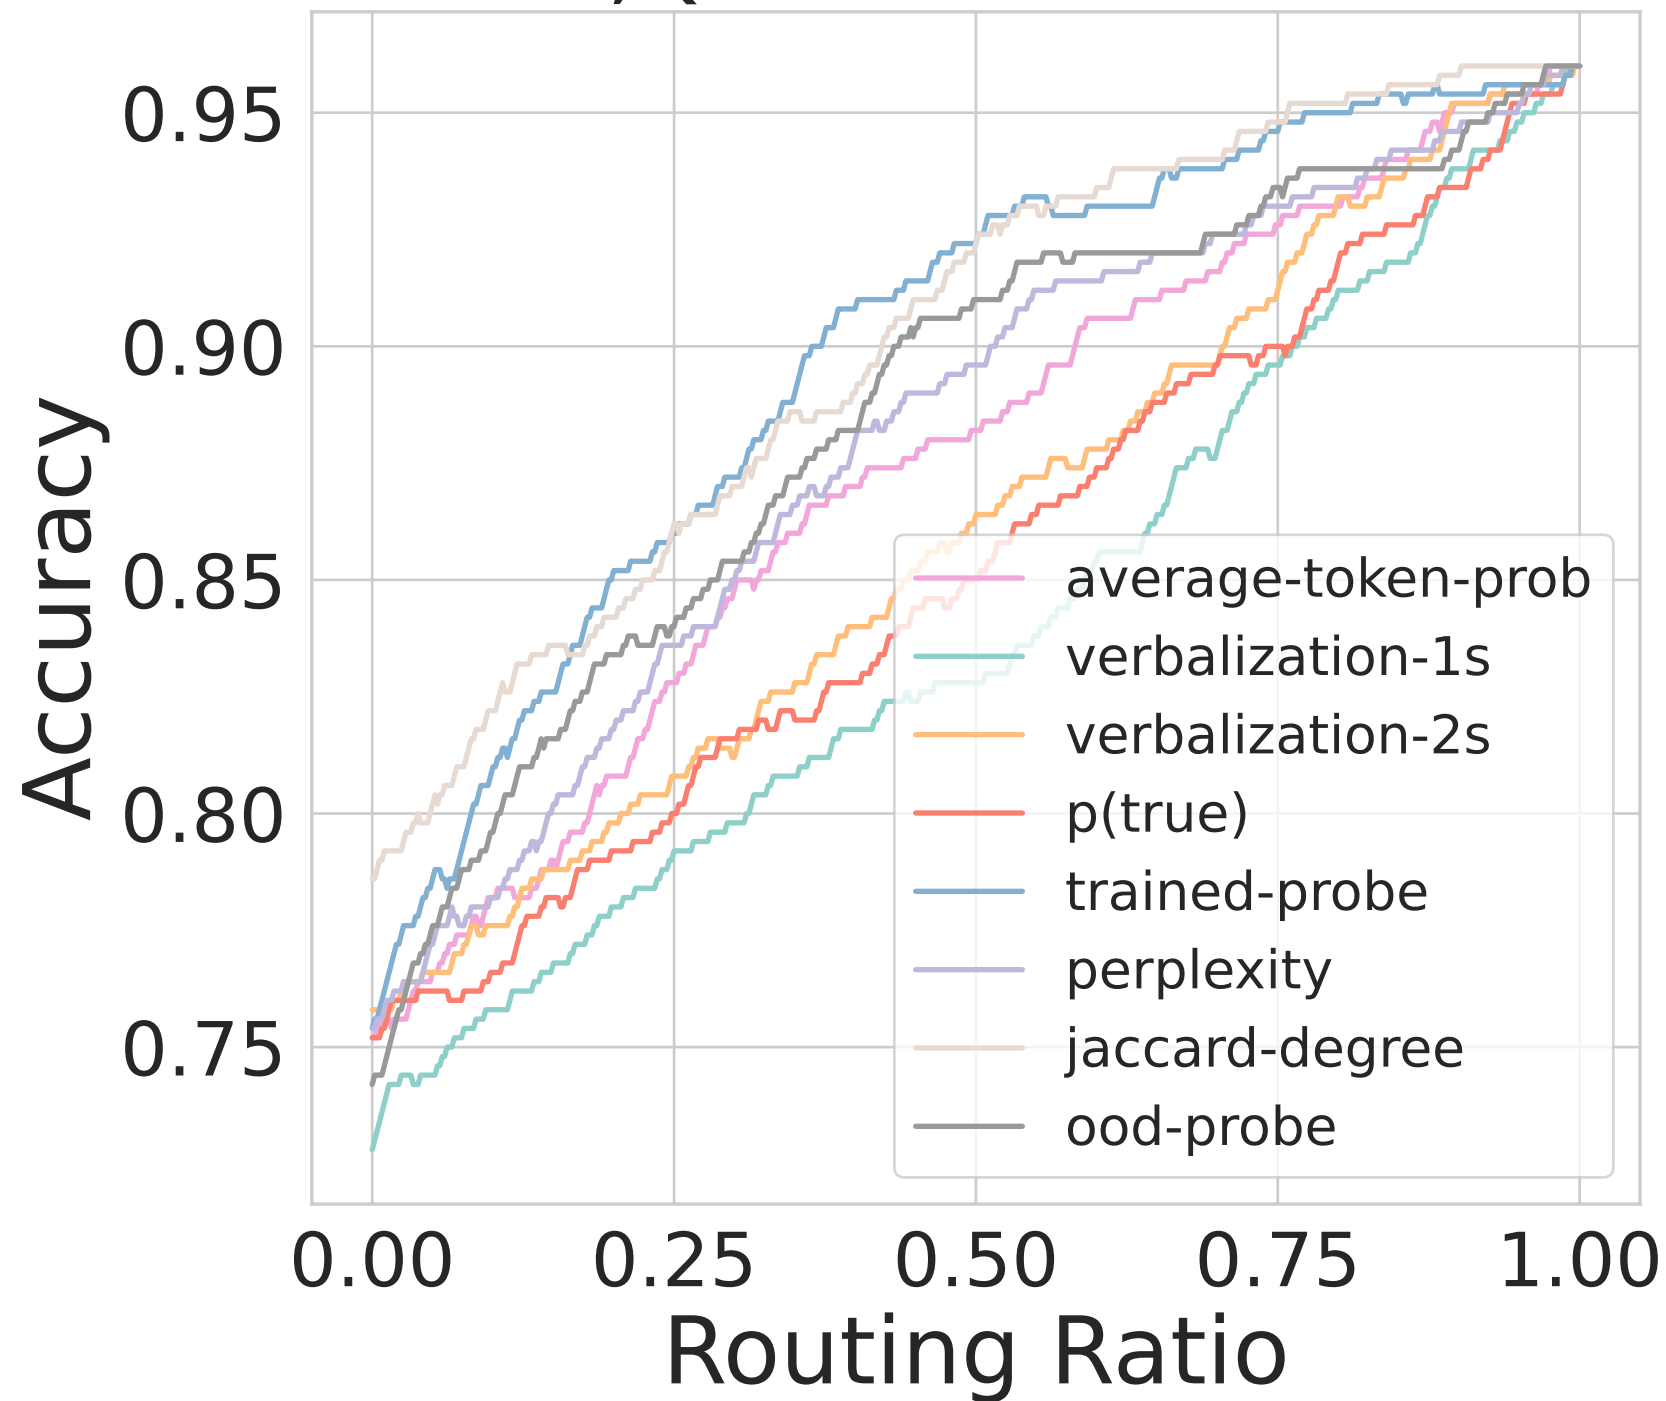

Supplement: supplementary_material [file rr_acc_gsm8k_Qwen3-0.6B_gpt41.pdf › Routing_SLM_LLMs/Uncertainty-based Routing/w_legend/to_gpt41/rr_acc_gsm8k_Qwen3-0.6B_gpt41.pdf]

# GSM8K, Qwen3-1.7B to GPT-4.1 mini

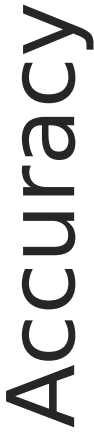

ood-probe

Supplement: supplementary_material [file rr_acc_gsm8k_Qwen3-1.7B_gpt41.pdf › Routing_SLM_LLMs/Uncertainty-based Routing/w_legend/to_gpt41/rr_acc_gsm8k_Qwen3-1.7B_gpt41.pdf]

**GSM8K, Qwen3-4B to GPT-4.1 mini**

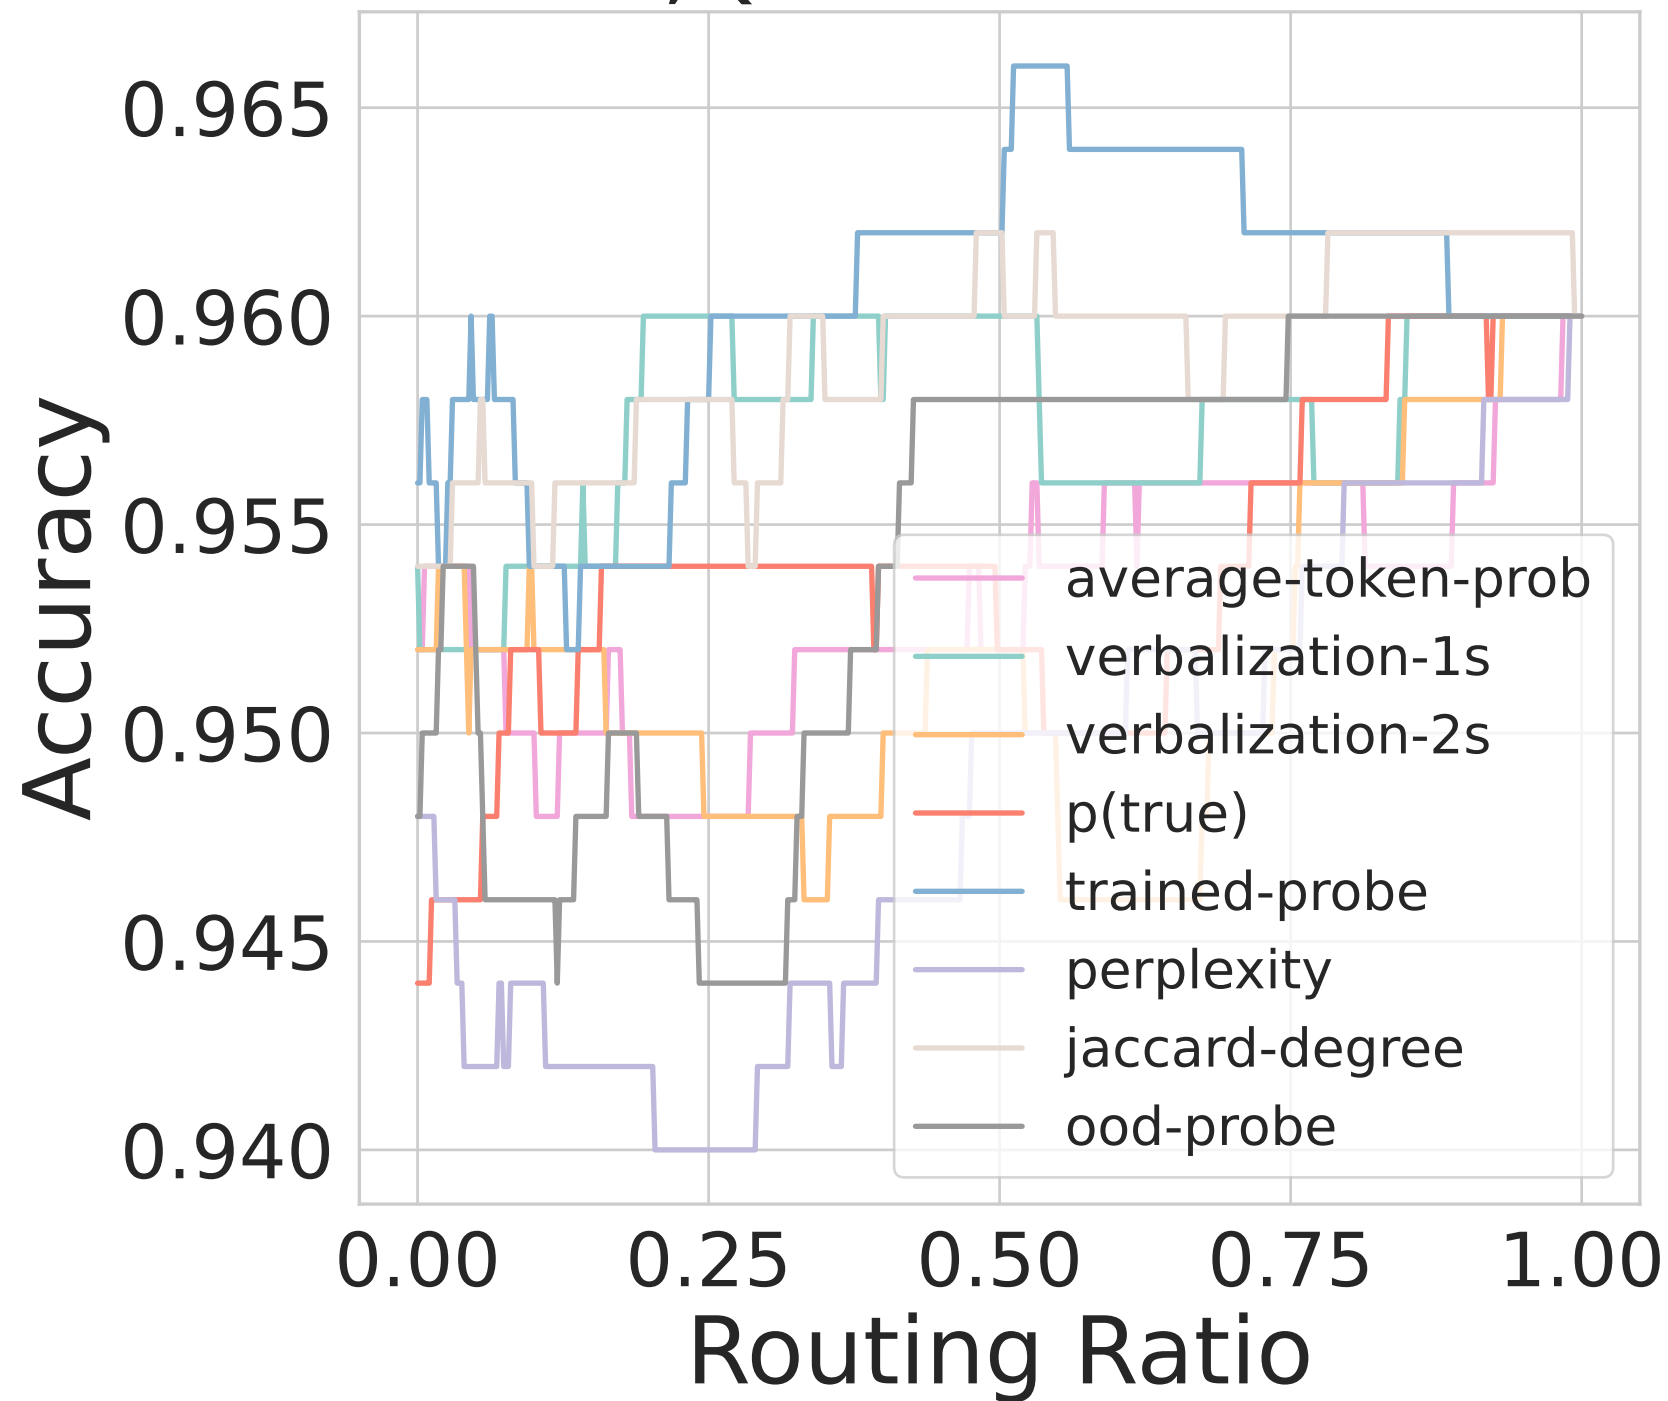

Supplement: supplementary_material [file rr_acc_gsm8k_Qwen3-4B_gpt41.pdf › Routing_SLM_LLMs/Uncertainty-based Routing/w_legend/to_gpt41/rr_acc_gsm8k_Qwen3-4B_gpt41.pdf]

**GSM8K, granite-3.1-8b to GPT-4.1 mini**

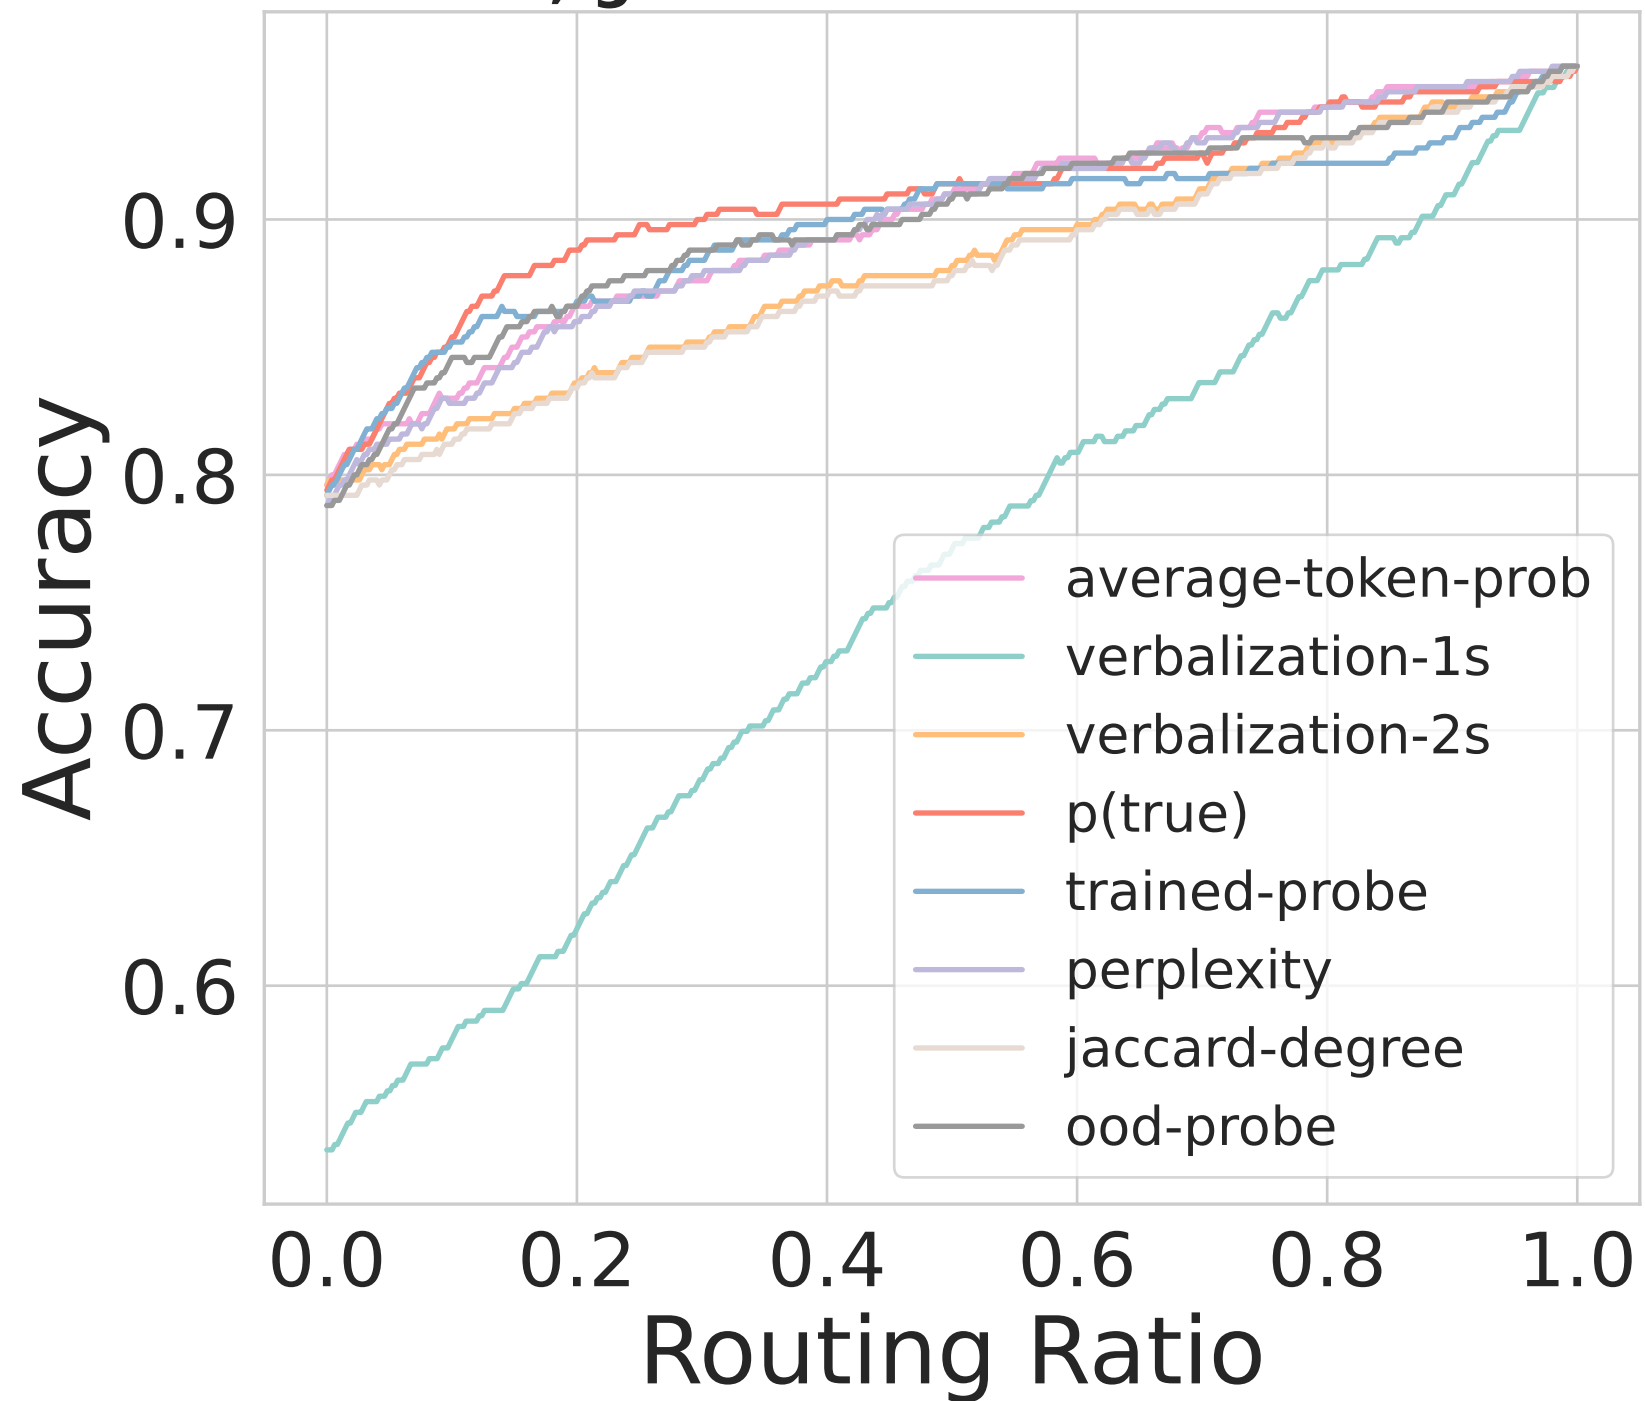

Supplement: supplementary_material [file rr_acc_gsm8k_granite-3.1-8b_gpt41.pdf › Routing_SLM_LLMs/Uncertainty-based Routing/w_legend/to_gpt41/rr_acc_gsm8k_granite-3.1-8b_gpt41.pdf]

# GSM8K, llama-3.1-8b to GPT-4.1 mini

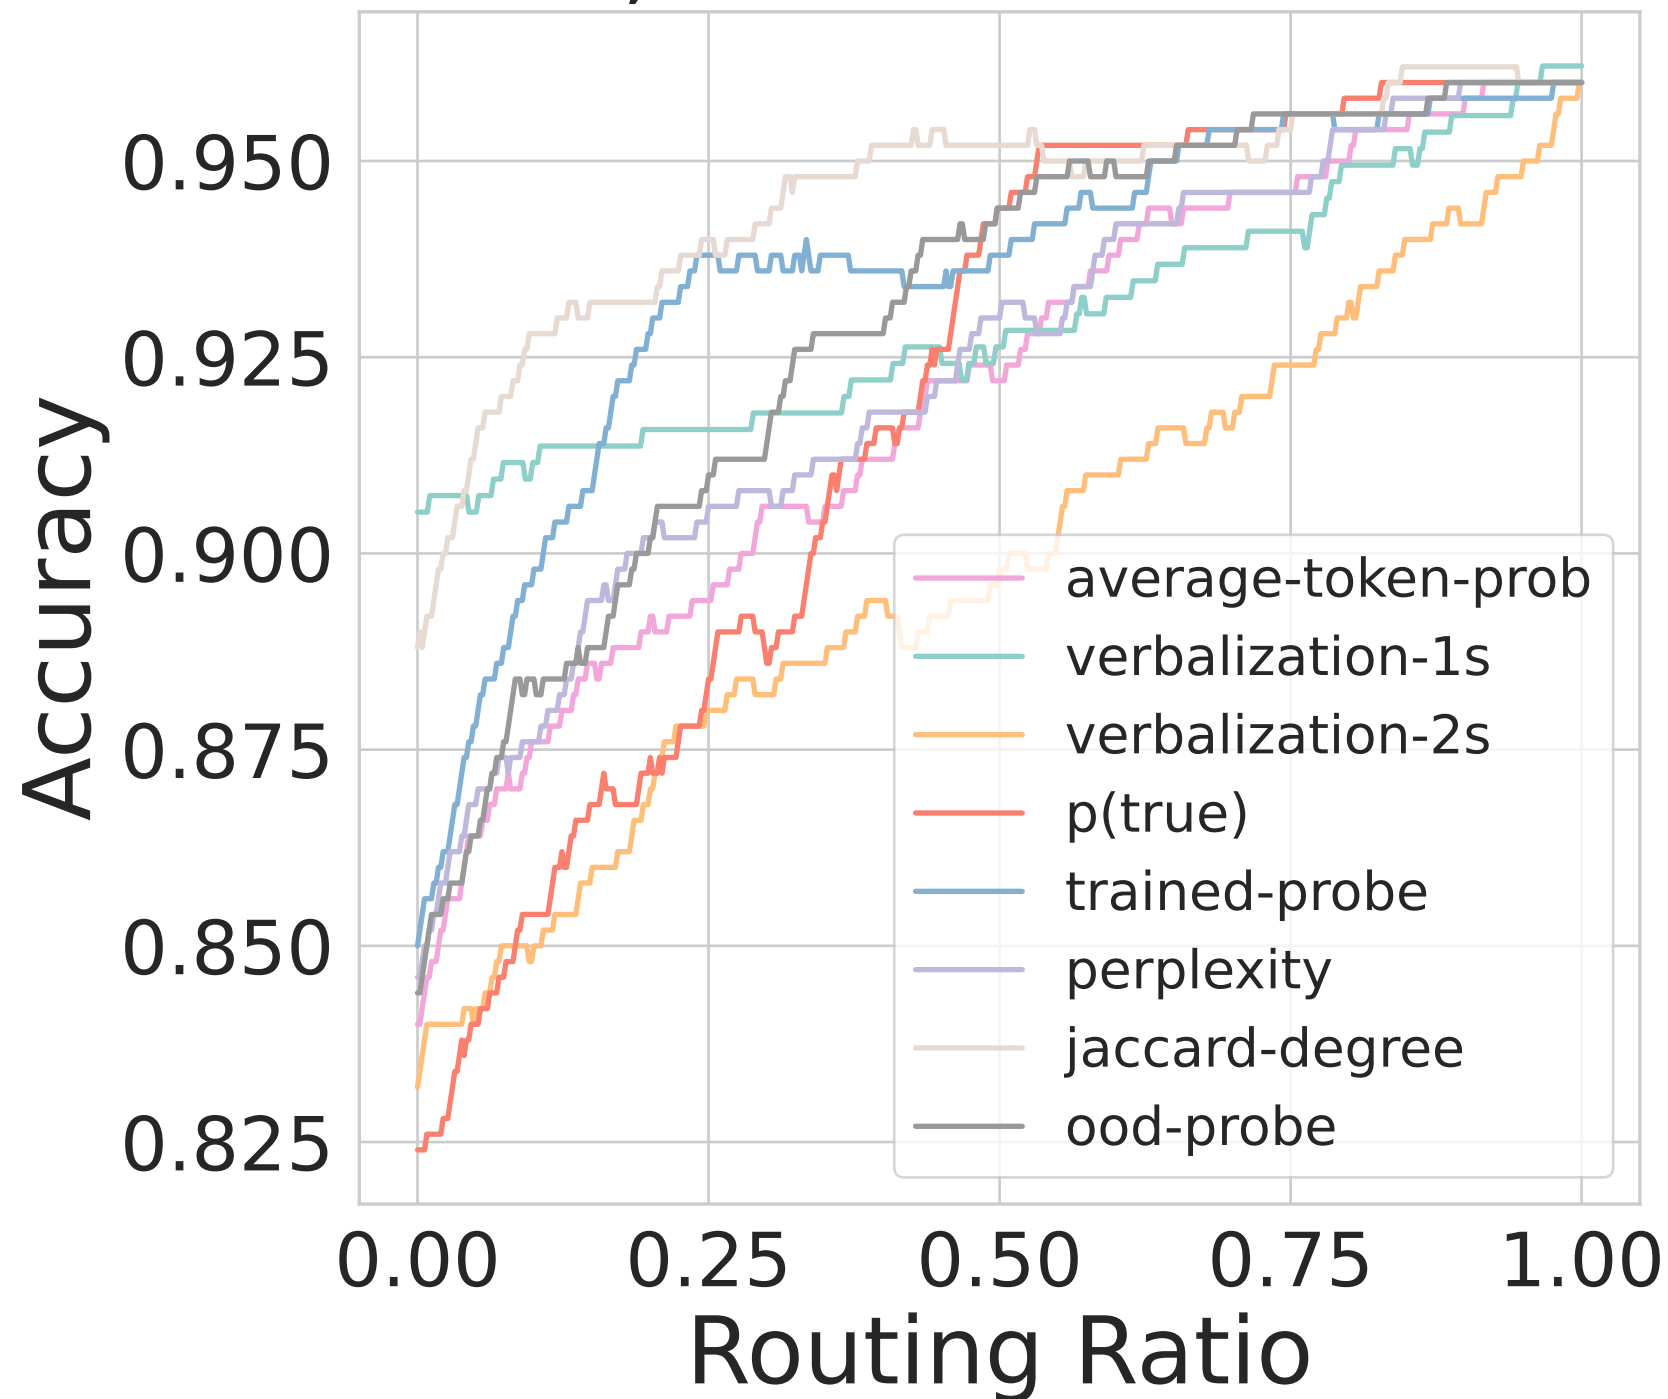

Supplement: supplementary_material [file rr_acc_gsm8k_llama-3.1-8b_gpt41.pdf › Routing_SLM_LLMs/Uncertainty-based Routing/w_legend/to_gpt41/rr_acc_gsm8k_llama-3.1-8b_gpt41.pdf]

## GSM8K, llama-3.2-1b to GPT-4.1 mini

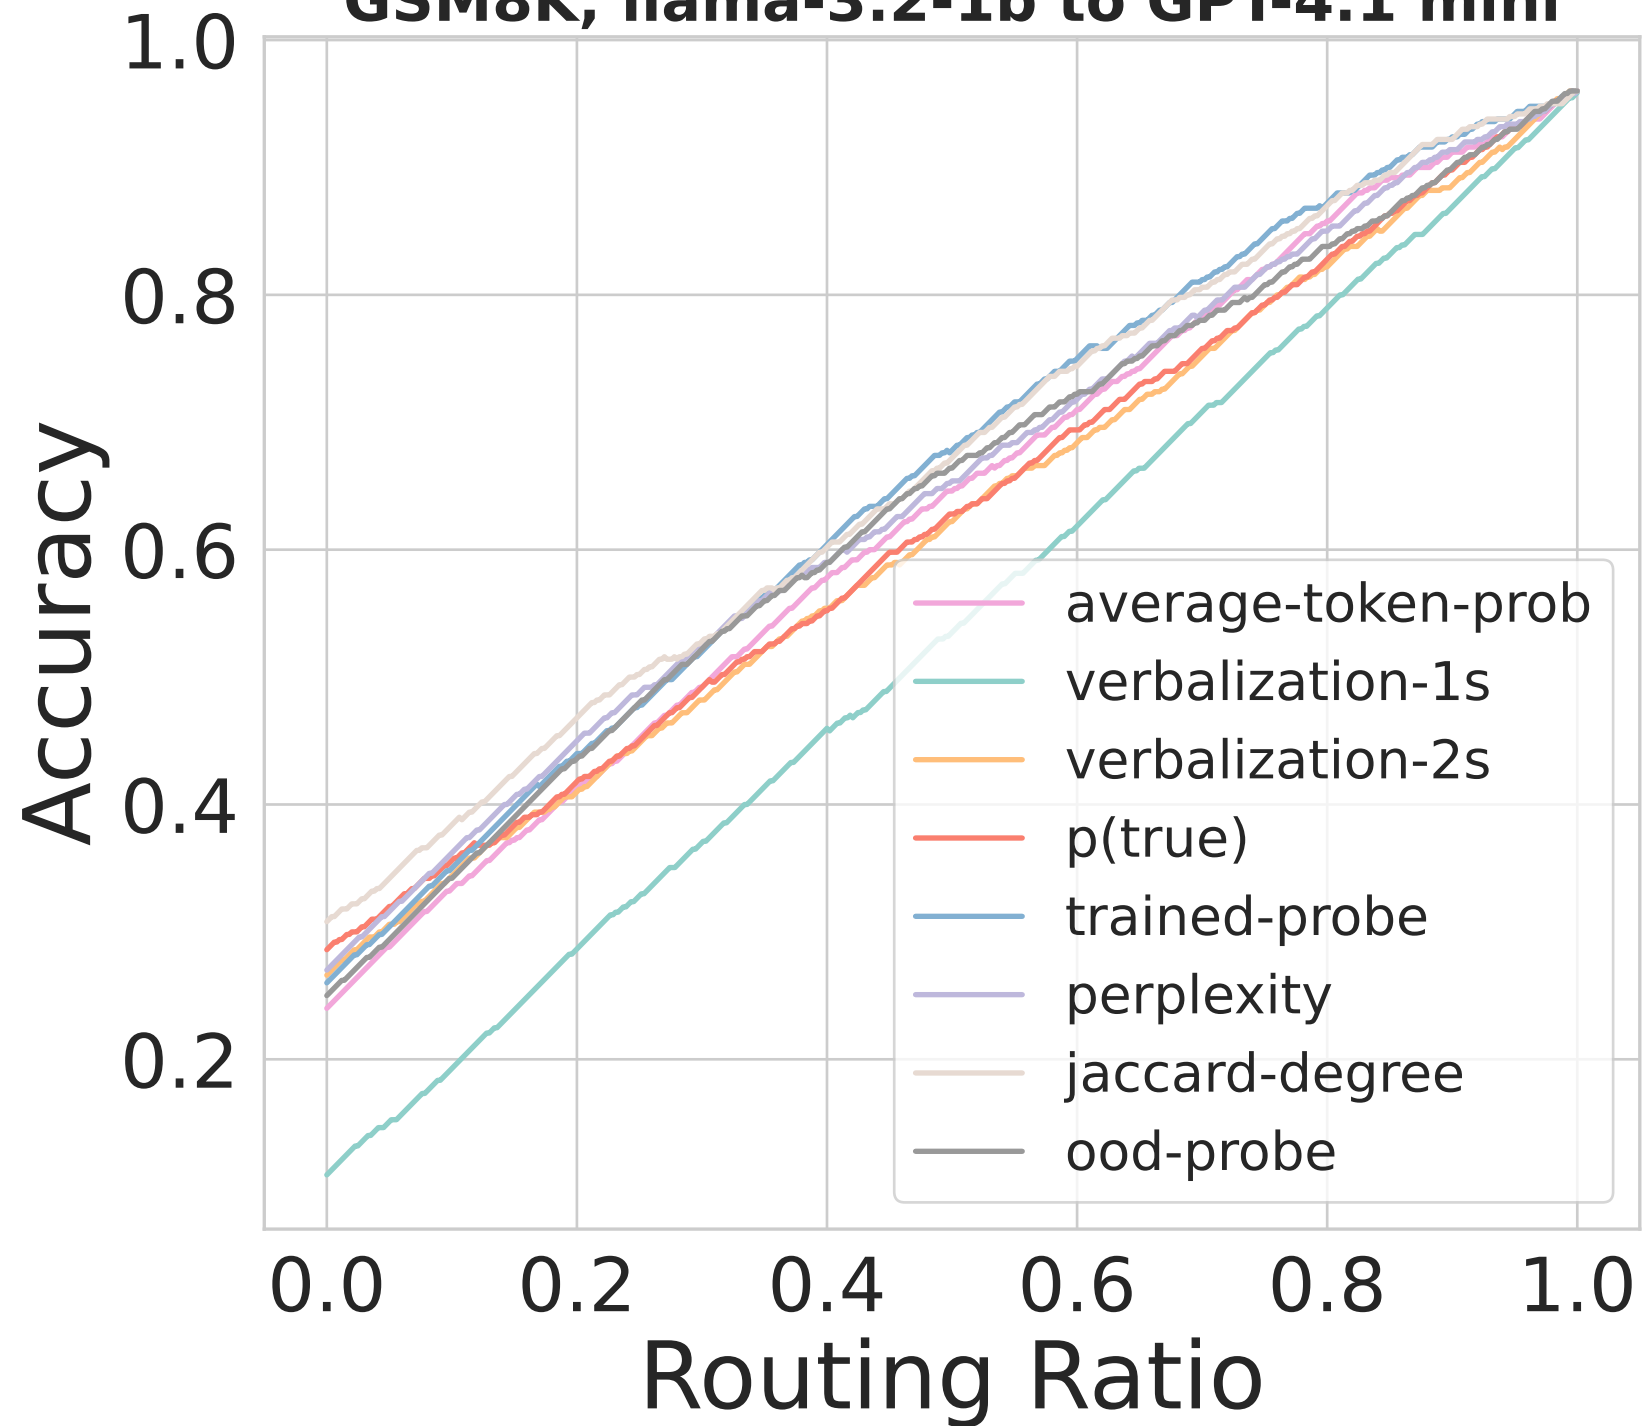

Supplement: supplementary_material [file rr_acc_gsm8k_llama-3.2-1b_gpt41.pdf › Routing_SLM_LLMs/Uncertainty-based Routing/w_legend/to_gpt41/rr_acc_gsm8k_llama-3.2-1b_gpt41.pdf]

**GSM8K, phi-3.5-mini to GPT-4.1 mini**

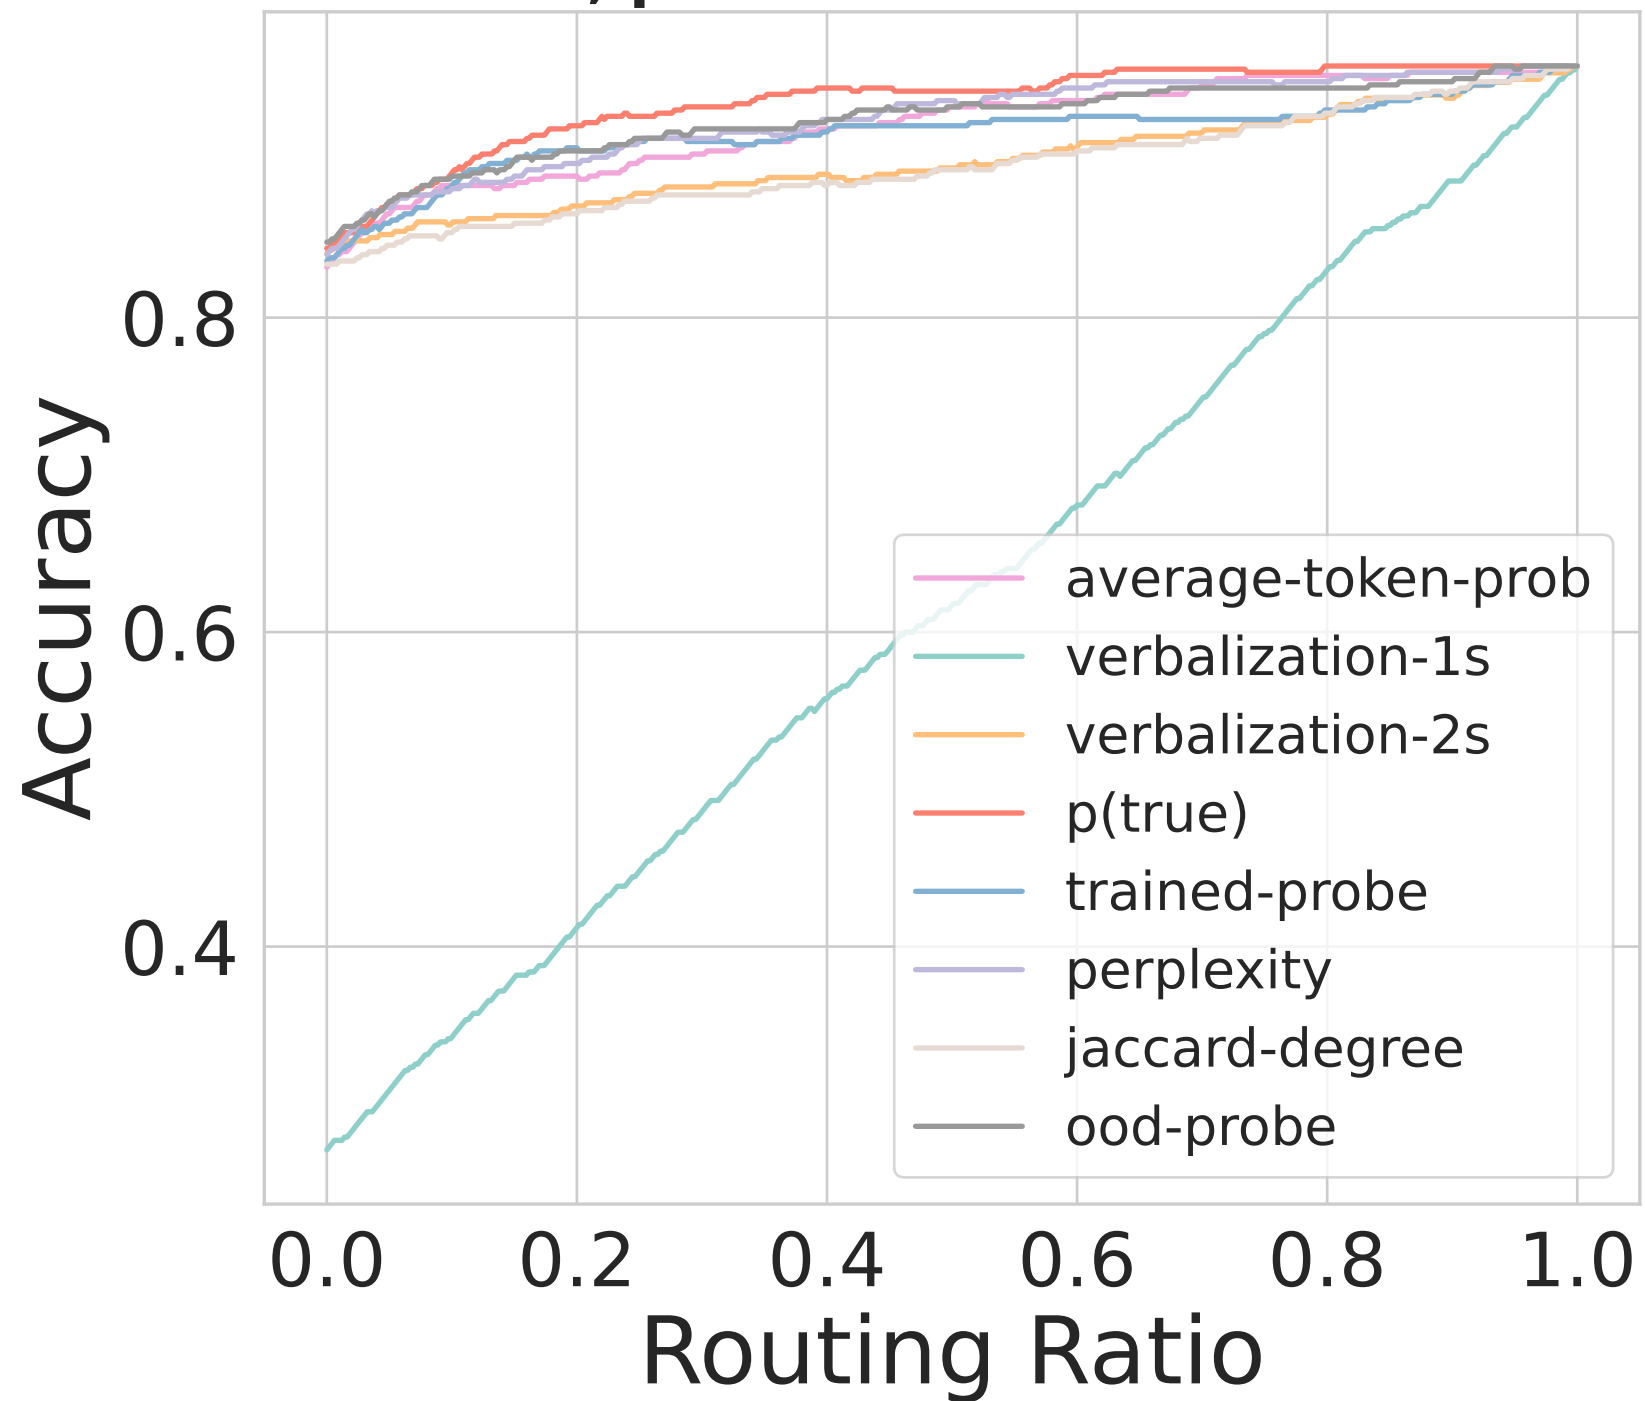

Supplement: supplementary_material [file rr_acc_gsm8k_phi-3.5-mini_gpt41.pdf › Routing_SLM_LLMs/Uncertainty-based Routing/w_legend/to_gpt41/rr_acc_gsm8k_phi-3.5-mini_gpt41.pdf]

# GSM8K, phi-4-mini-reasoning to GPT-4.1 mini

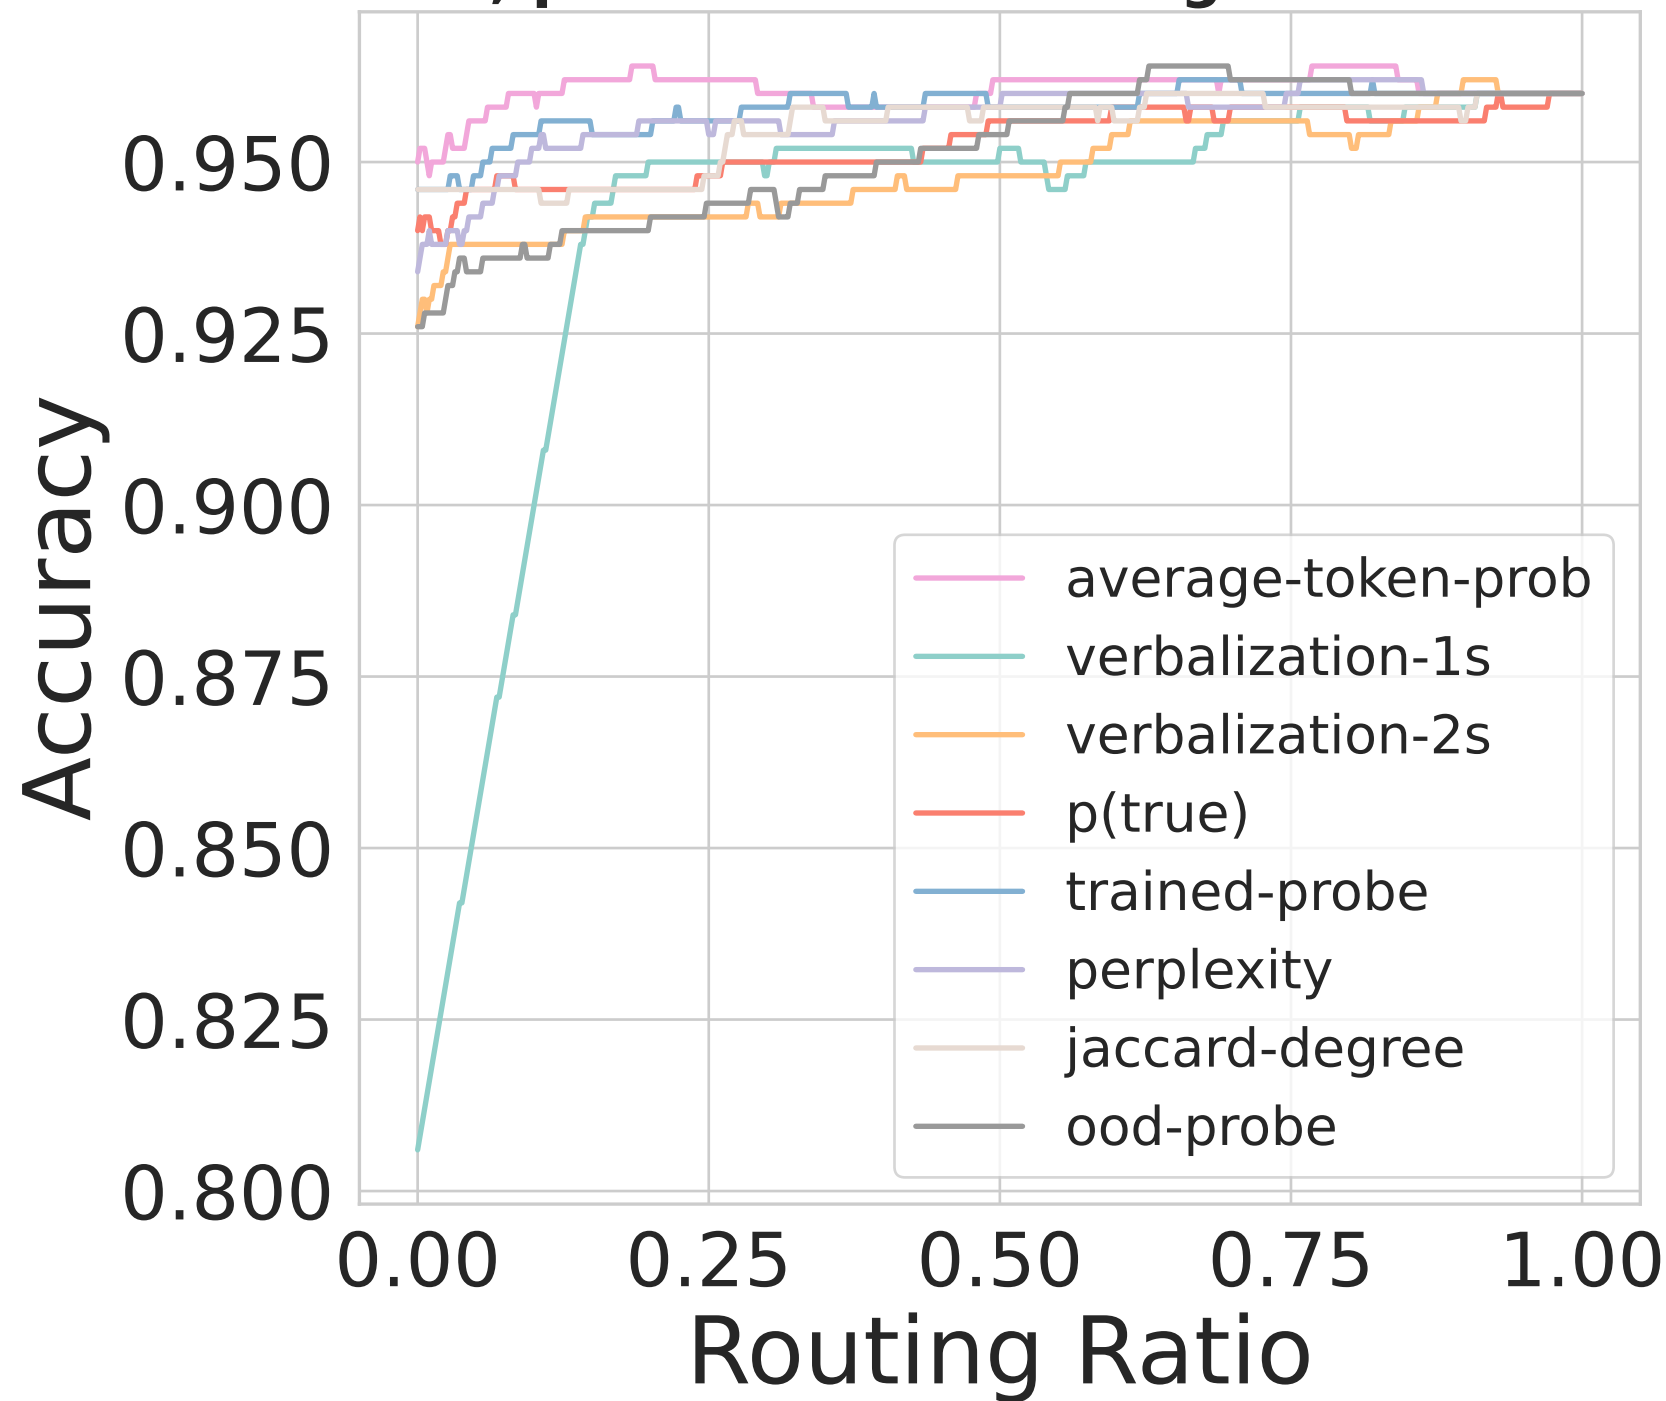

Supplement: supplementary_material [file rr_acc_gsm8k_phi-4-mini-reasoning_gpt41.pdf › Routing_SLM_LLMs/Uncertainty-based Routing/w_legend/to_gpt41/rr_acc_gsm8k_phi-4-mini-reasoning_gpt41.pdf]

# GSM8K, qwen-2.5-7b to GPT-4.1 mini

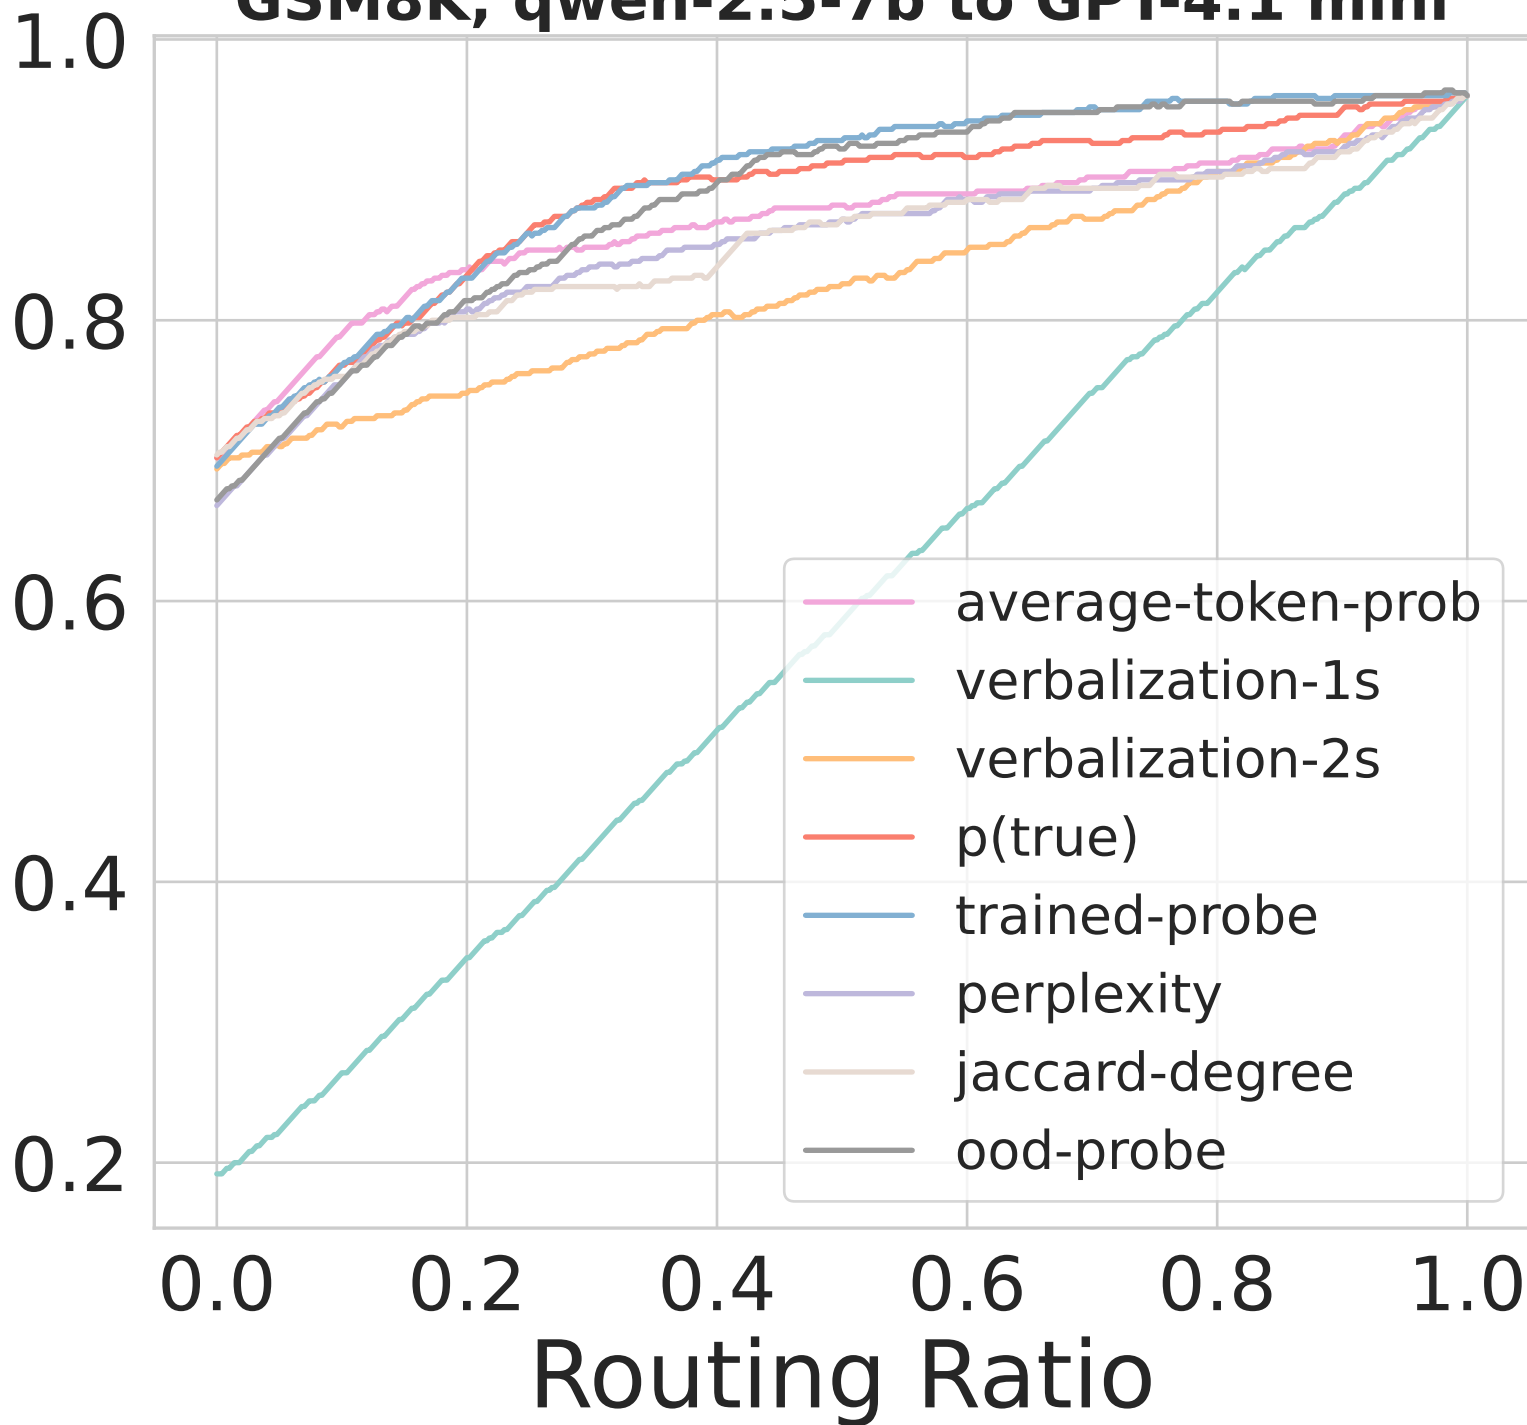

Supplement: supplementary_material [file rr_acc_gsm8k_qwen-2.5-7b_gpt41.pdf › Routing_SLM_LLMs/Uncertainty-based Routing/w_legend/to_gpt41/rr_acc_gsm8k_qwen-2.5-7b_gpt41.pdf]

## GSM8K, rwkv to GPT-4.1 mini

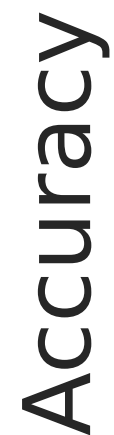

Supplement: supplementary_material [file rr_acc_gsm8k_rwkv_gpt41.pdf › Routing_SLM_LLMs/Uncertainty-based Routing/w_legend/to_gpt41/rr_acc_gsm8k_rwkv_gpt41.pdf]

# HellaSwag, Qwen3-0.6B to GPT-4.1 mini

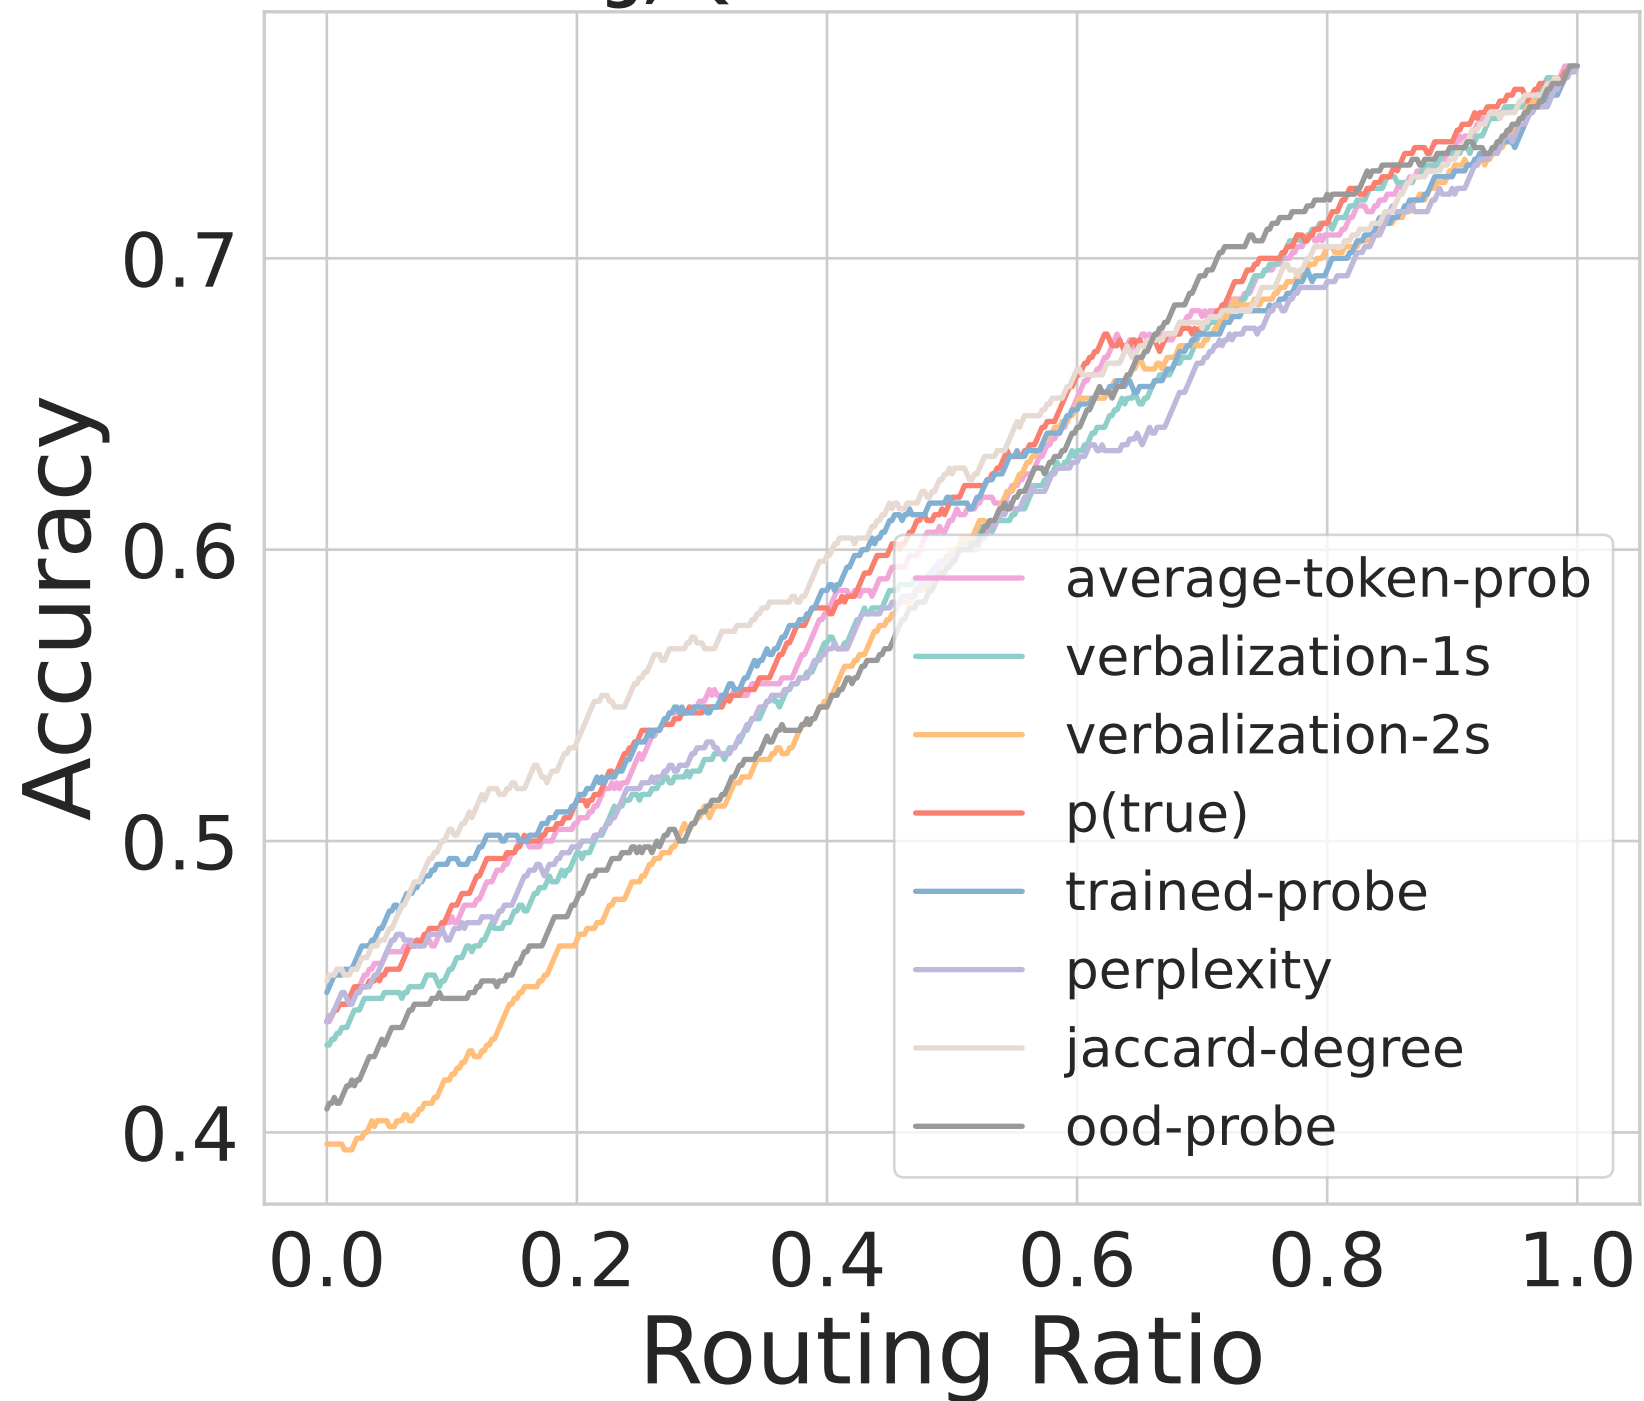

Supplement: supplementary_material [file rr_acc_hellaswag_Qwen3-0.6B_gpt41.pdf › Routing_SLM_LLMs/Uncertainty-based Routing/w_legend/to_gpt41/rr_acc_hellaswag_Qwen3-0.6B_gpt41.pdf]

**HellaSwag, Qwen3-1.7B to GPT-4.1 mini**

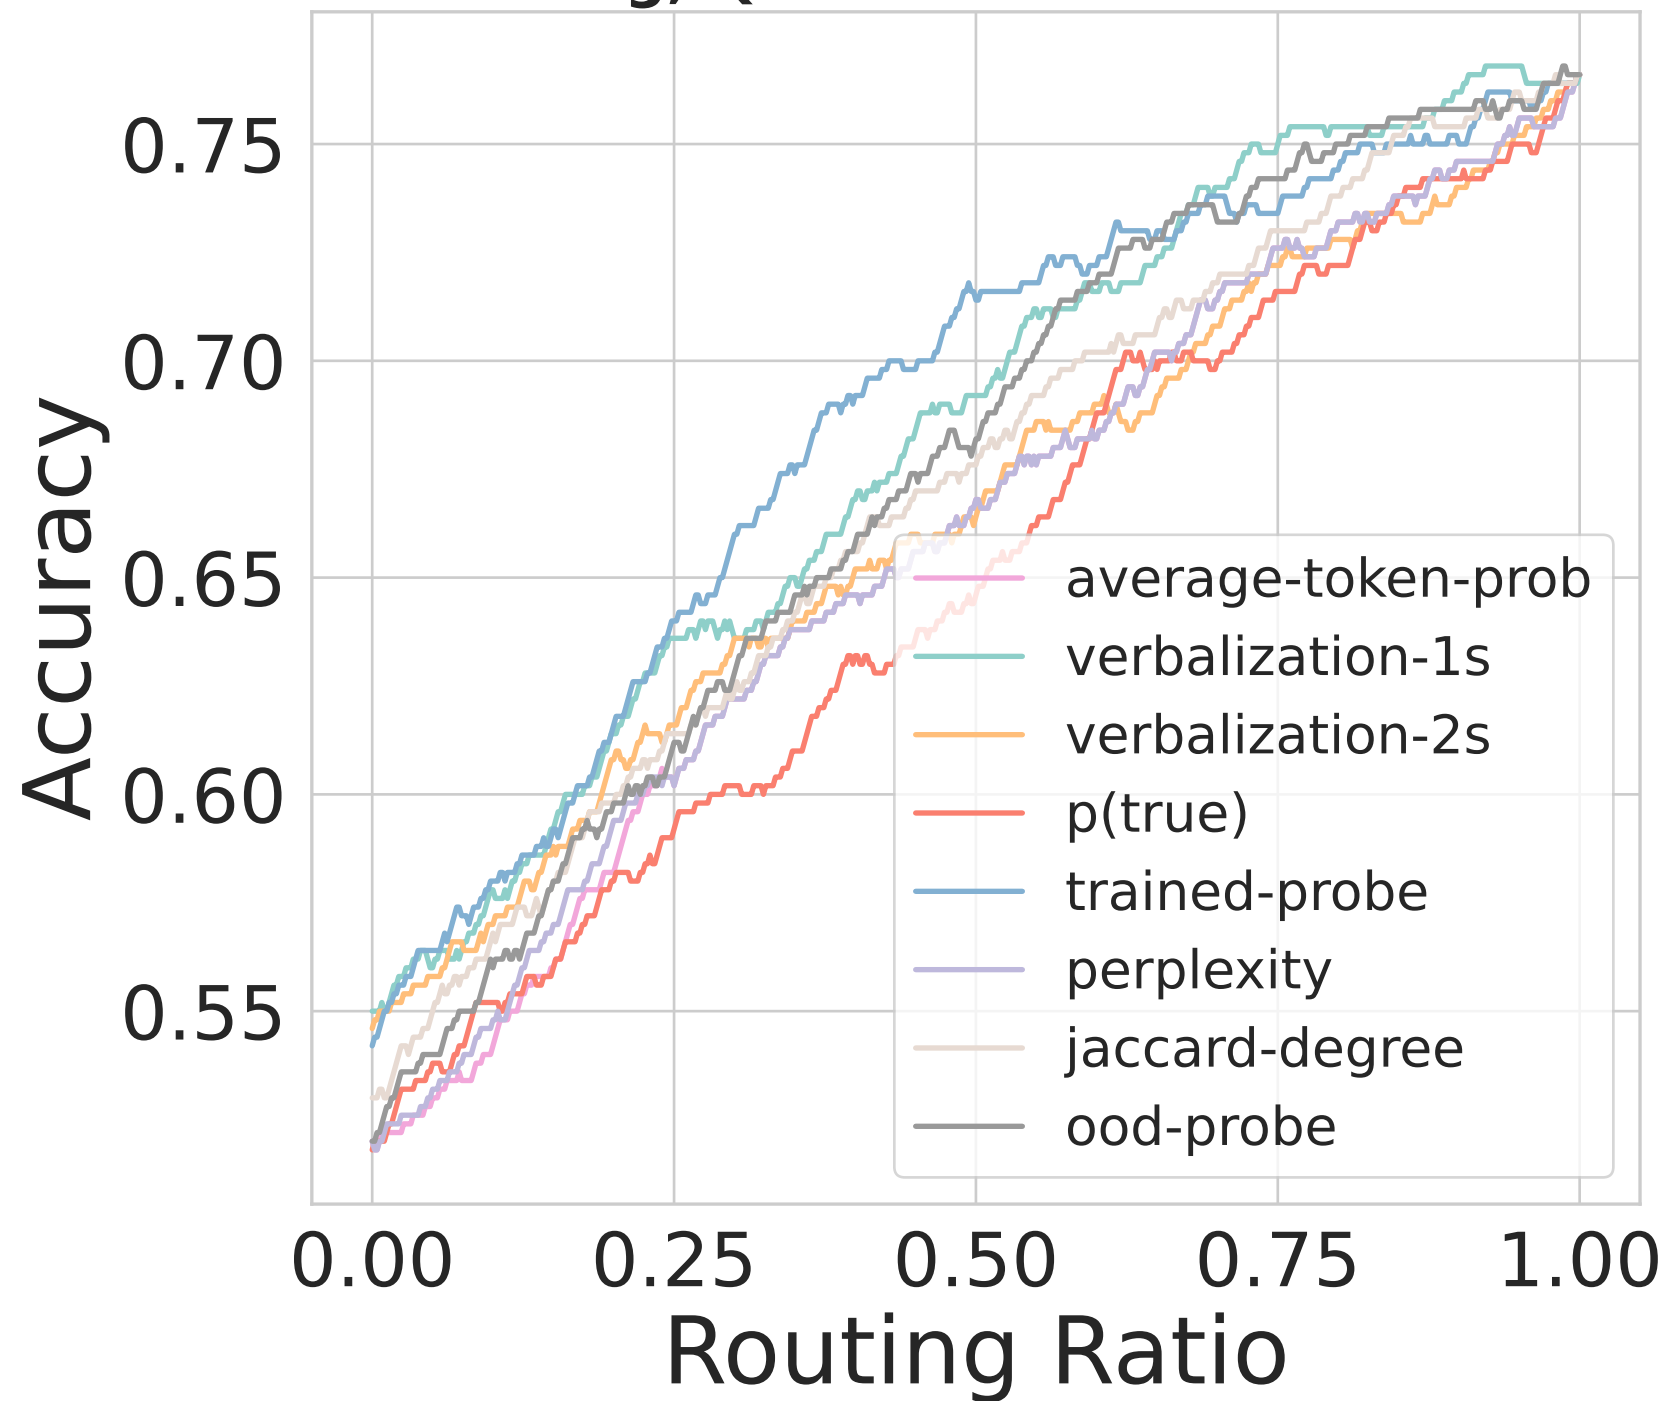

Supplement: supplementary_material [file rr_acc_hellaswag_Qwen3-1.7B_gpt41.pdf › Routing_SLM_LLMs/Uncertainty-based Routing/w_legend/to_gpt41/rr_acc_hellaswag_Qwen3-1.7B_gpt41.pdf]

# HellaSwag, Qwen3-4B to GPT-4.1 mini

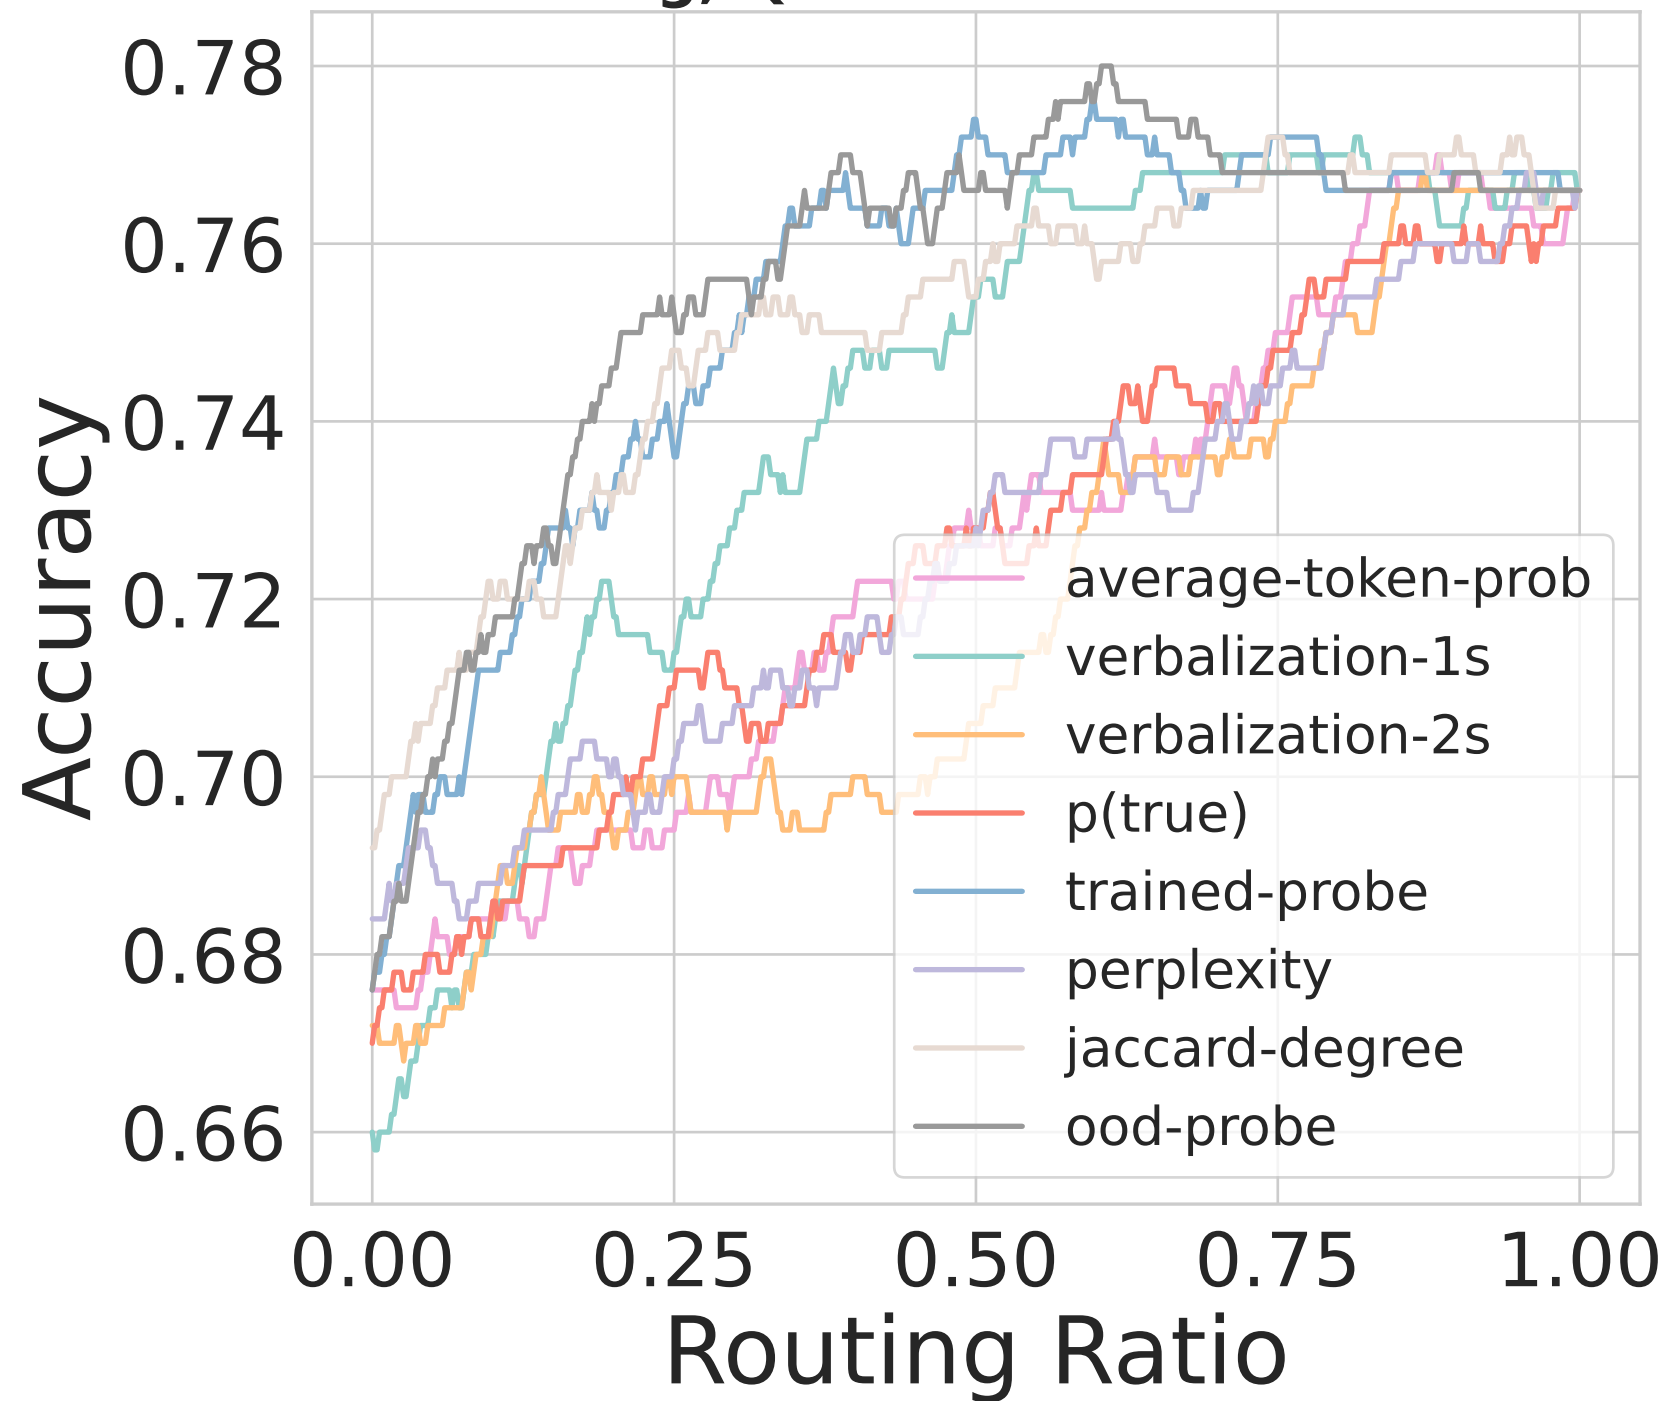

Supplement: supplementary_material [file rr_acc_hellaswag_Qwen3-4B_gpt41.pdf › Routing_SLM_LLMs/Uncertainty-based Routing/w_legend/to_gpt41/rr_acc_hellaswag_Qwen3-4B_gpt41.pdf]

# HellaSwag, granite-3.1-8b to GPT-4.1 mini

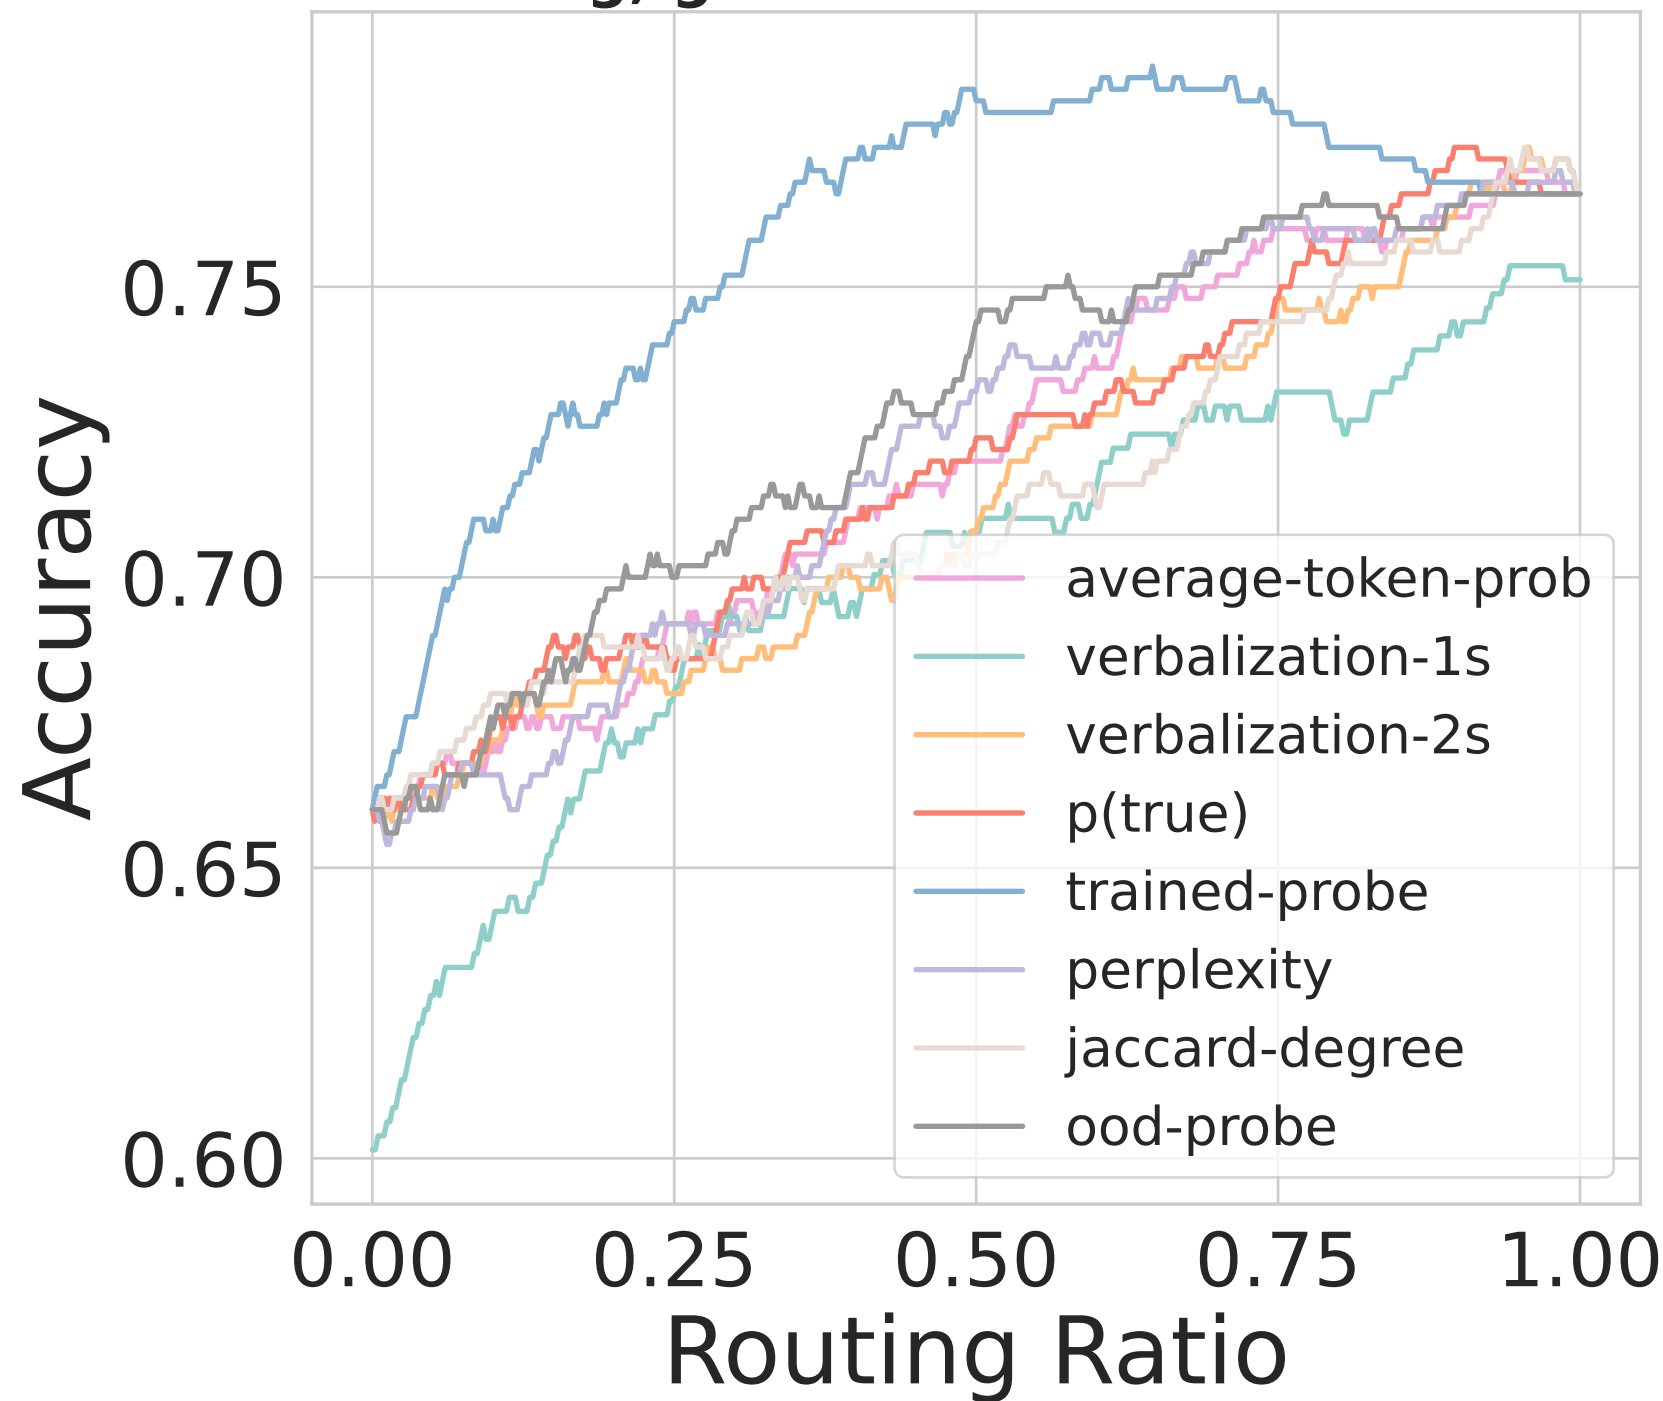

Supplement: supplementary_material [file rr_acc_hellaswag_granite-3.1-8b_gpt41.pdf › Routing_SLM_LLMs/Uncertainty-based Routing/w_legend/to_gpt41/rr_acc_hellaswag_granite-3.1-8b_gpt41.pdf]

**HellaSwag, llama-3.1-8b to GPT-4.1 mini**

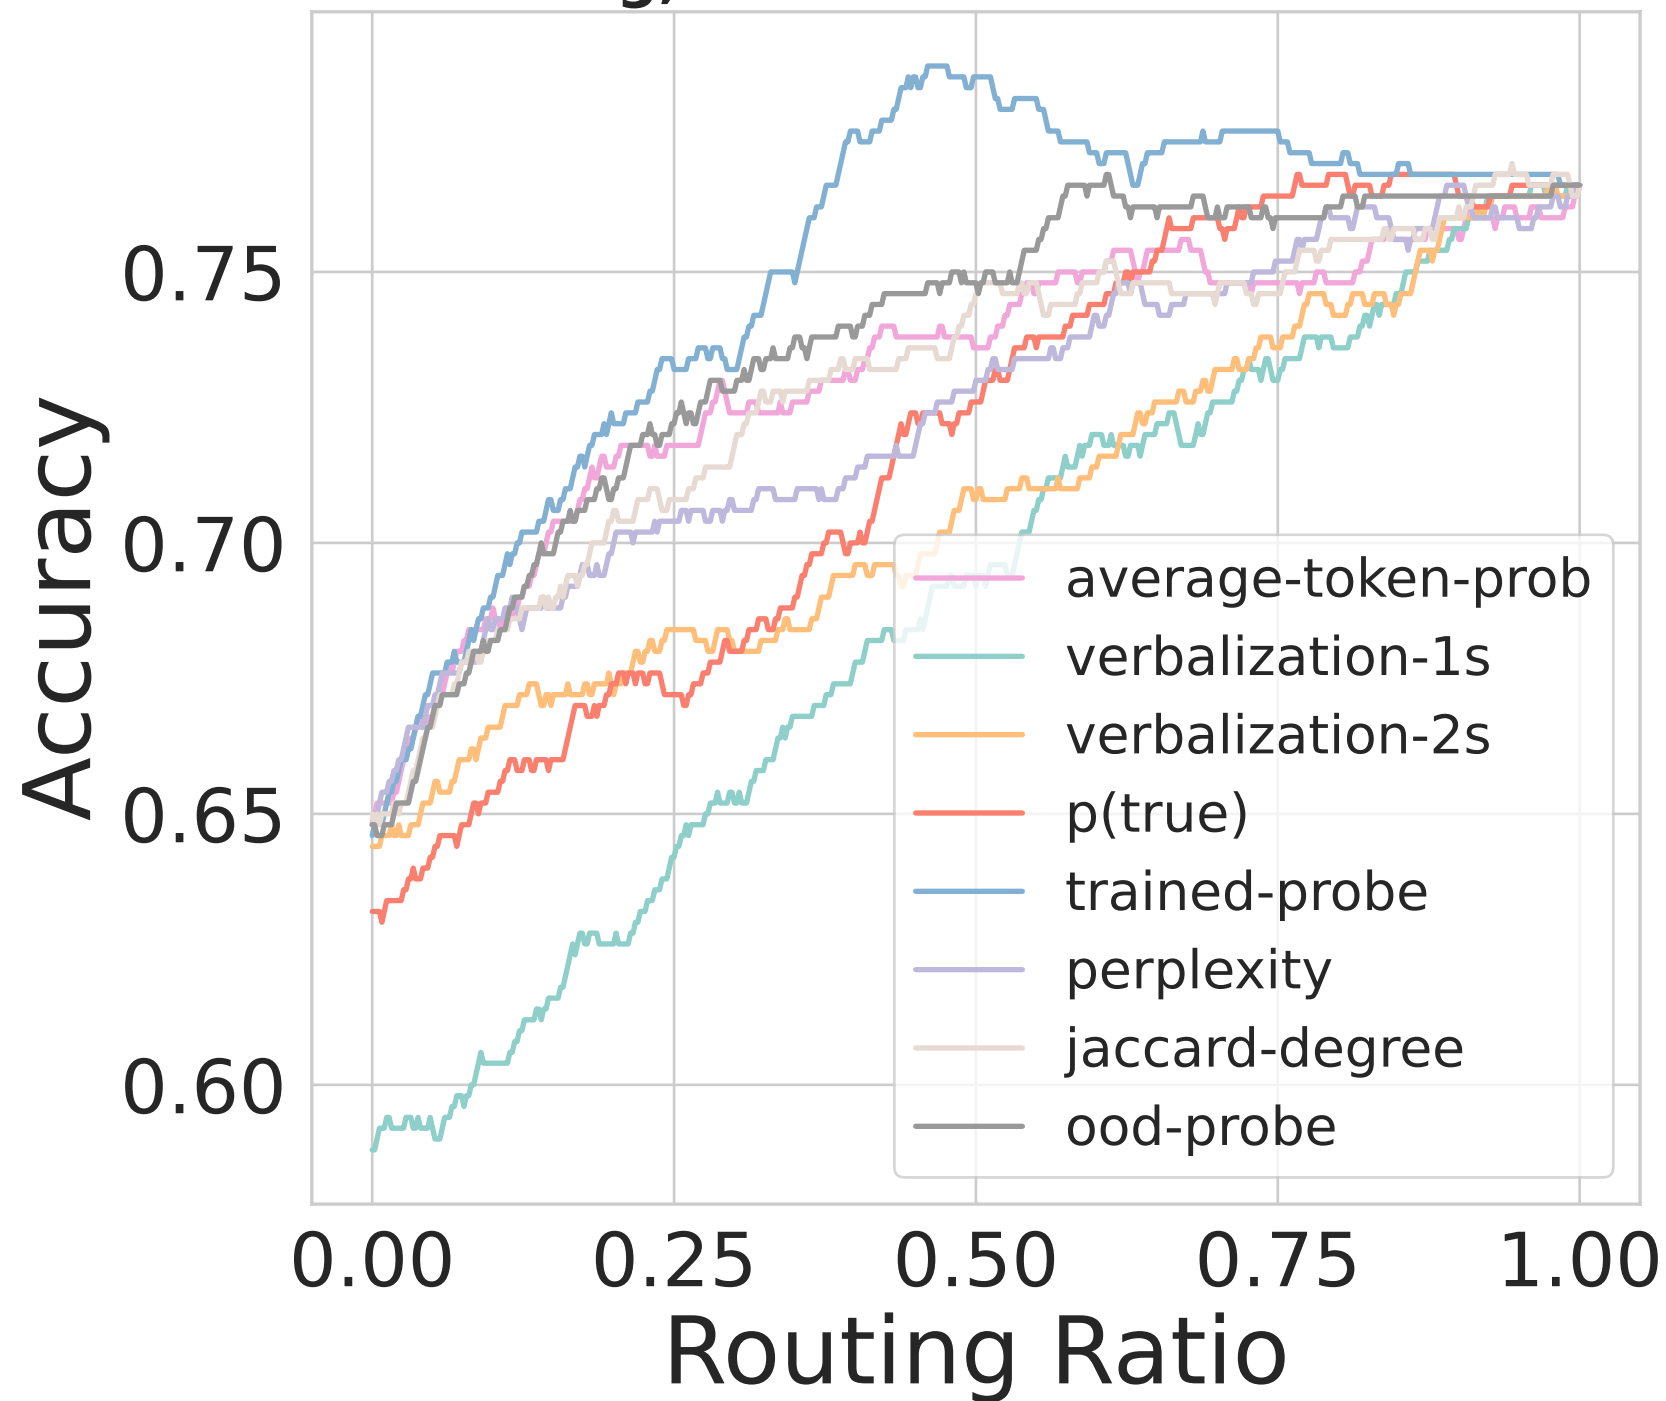

Supplement: supplementary_material [file rr_acc_hellaswag_llama-3.1-8b_gpt41.pdf › Routing_SLM_LLMs/Uncertainty-based Routing/w_legend/to_gpt41/rr_acc_hellaswag_llama-3.1-8b_gpt41.pdf]

**HellaSwag, mistral-7b to GPT-4.1 mini**

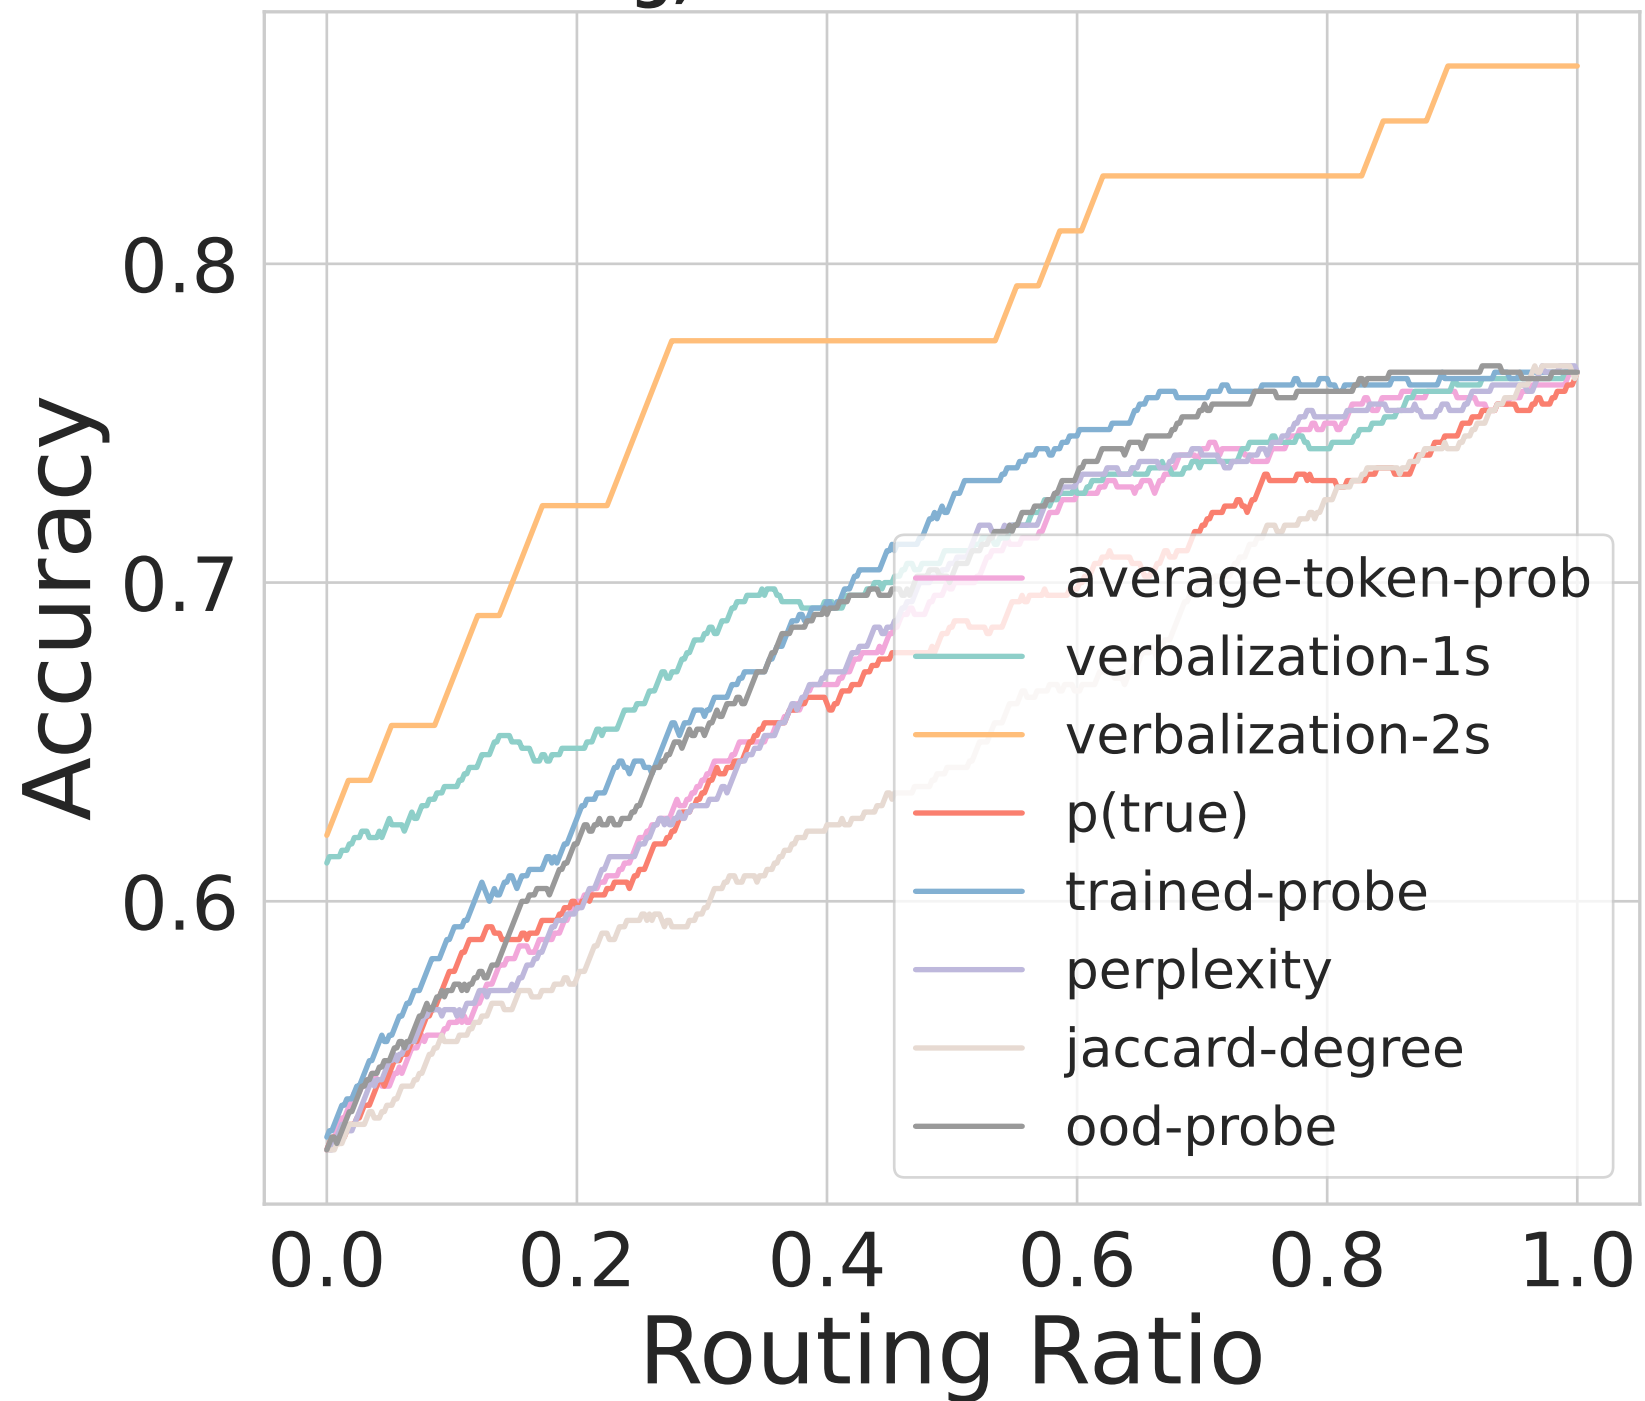

Supplement: supplementary_material [file rr_acc_hellaswag_mistral-7b_gpt41.pdf › Routing_SLM_LLMs/Uncertainty-based Routing/w_legend/to_gpt41/rr_acc_hellaswag_mistral-7b_gpt41.pdf]

**HellaSwag, phi-3.5-mini to GPT-4.1 mini**

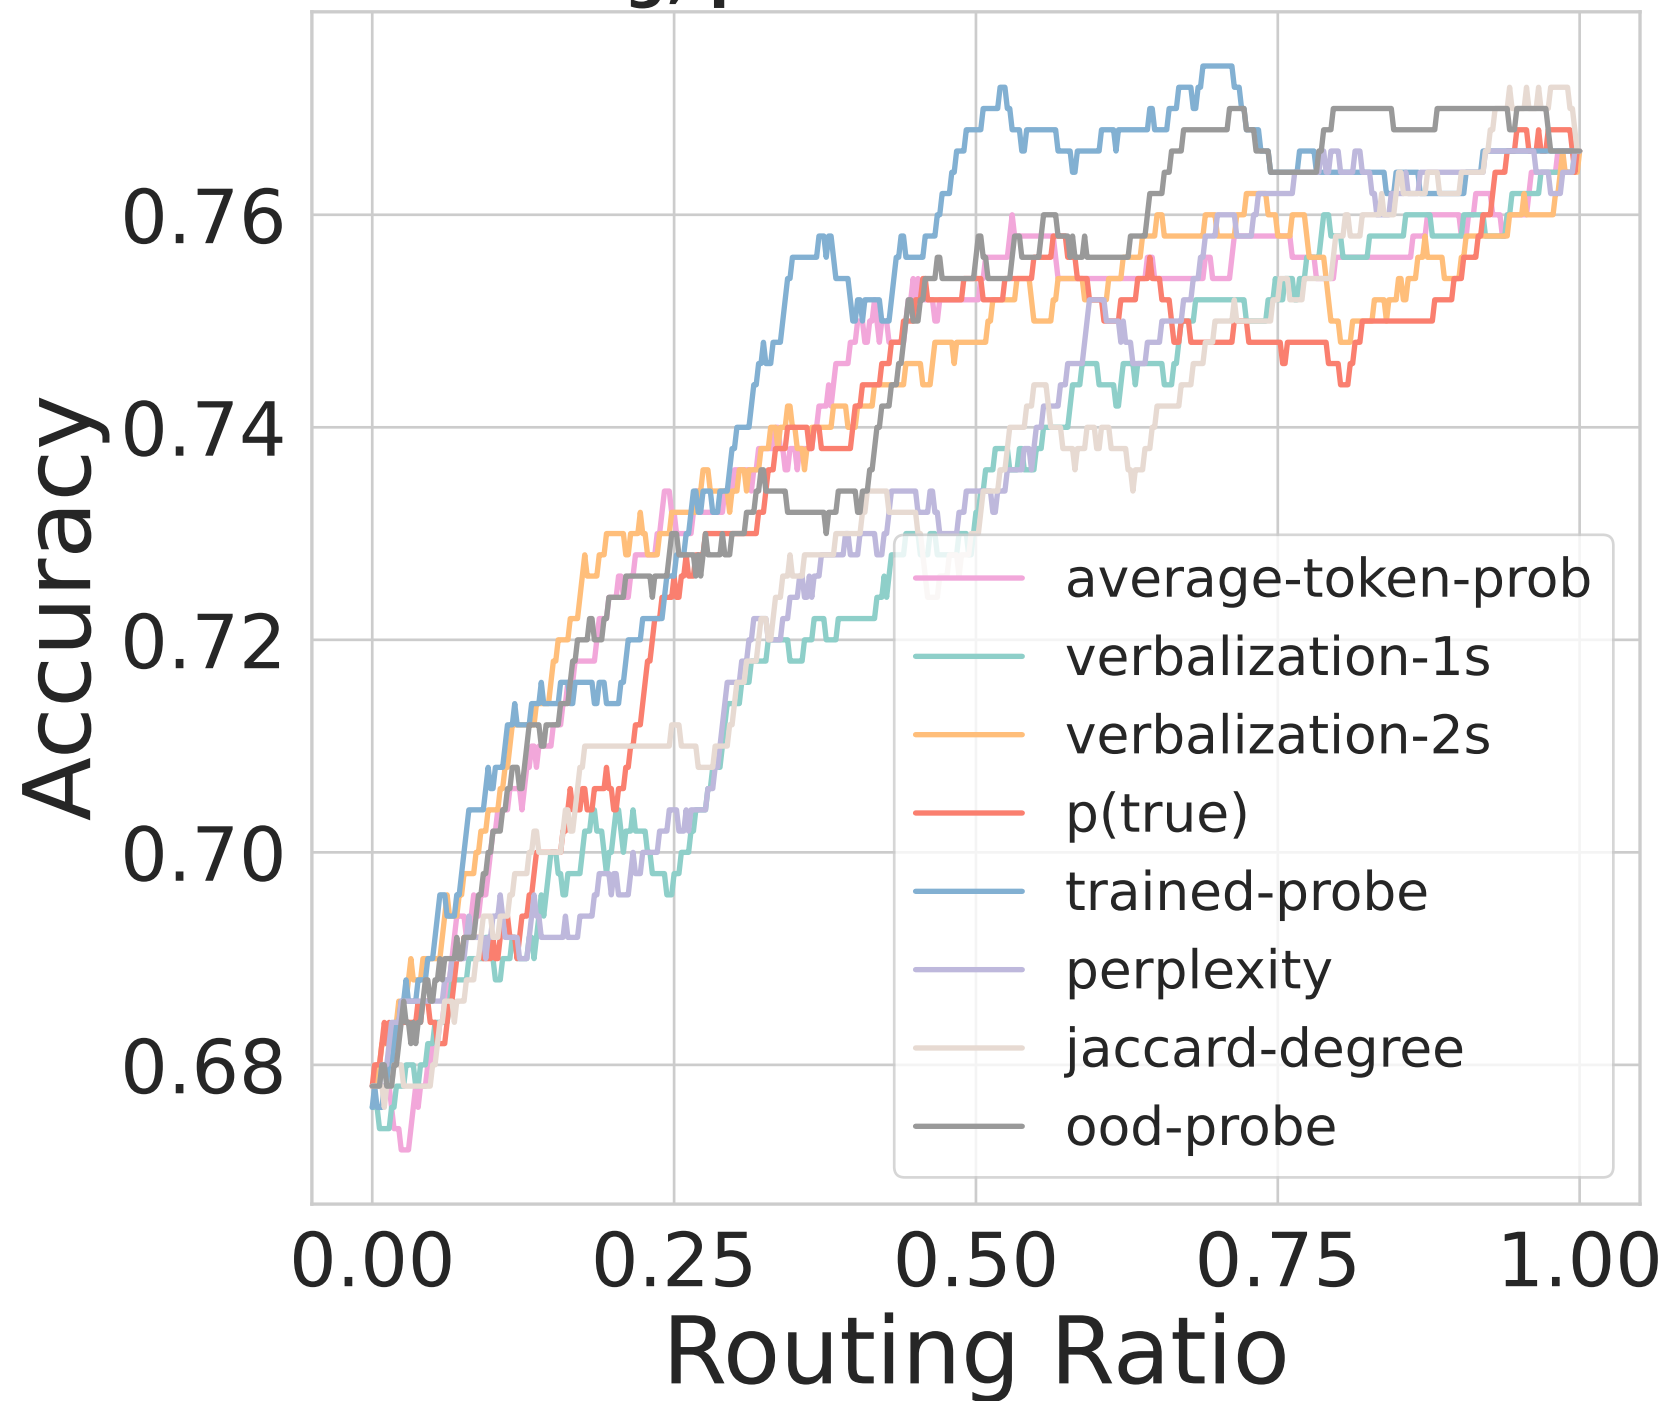

Supplement: supplementary_material [file rr_acc_hellaswag_phi-3.5-mini_gpt41.pdf › Routing_SLM_LLMs/Uncertainty-based Routing/w_legend/to_gpt41/rr_acc_hellaswag_phi-3.5-mini_gpt41.pdf]

# HellaSwag, phi-4-mini-reasoning to GPT-4.1 mini

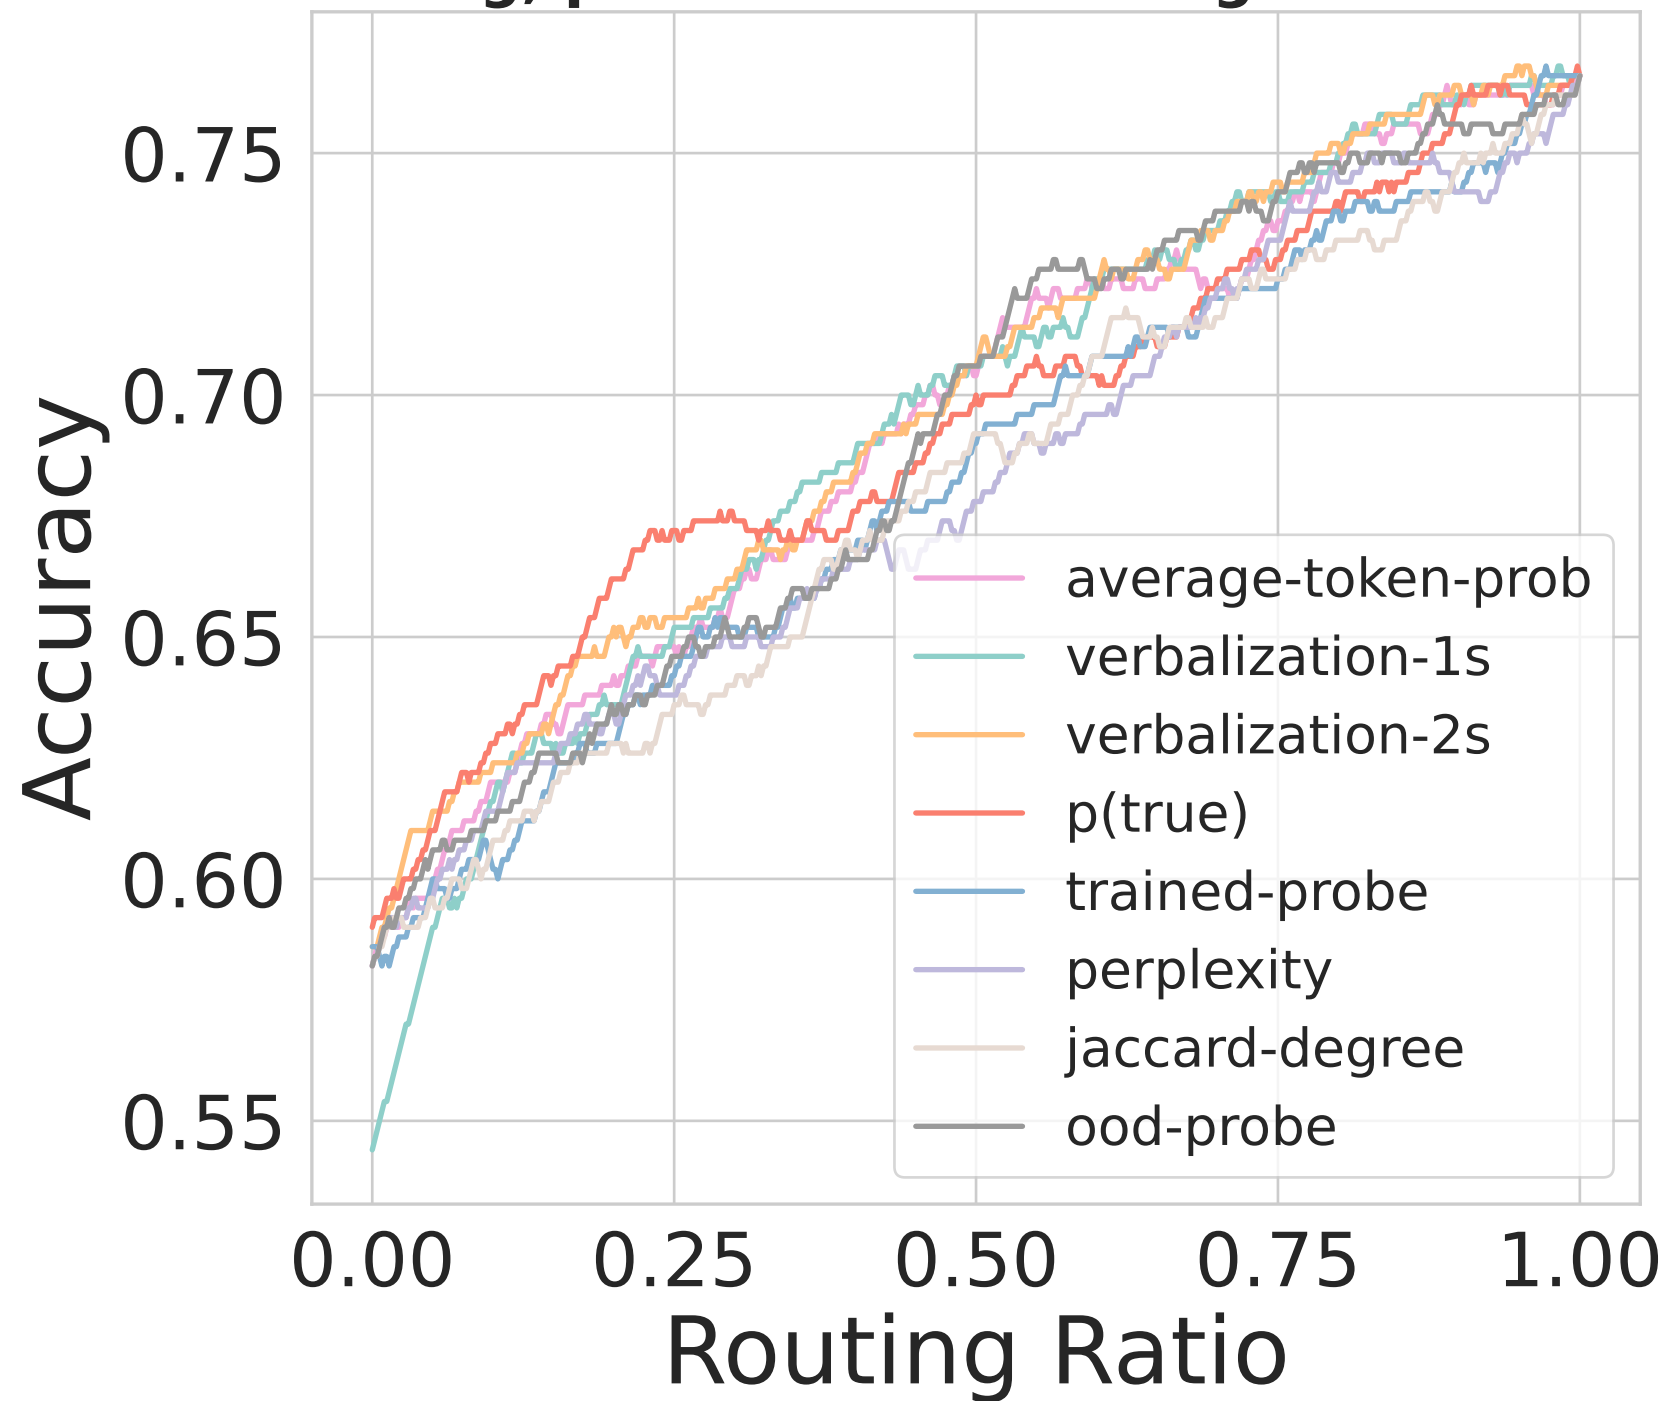

Supplement: supplementary_material [file rr_acc_hellaswag_phi-4-mini-reasoning_gpt41.pdf › Routing_SLM_LLMs/Uncertainty-based Routing/w_legend/to_gpt41/rr_acc_hellaswag_phi-4-mini-reasoning_gpt41.pdf]

**HellaSwag, qwen-2.5-7b to GPT-4.1 mini**

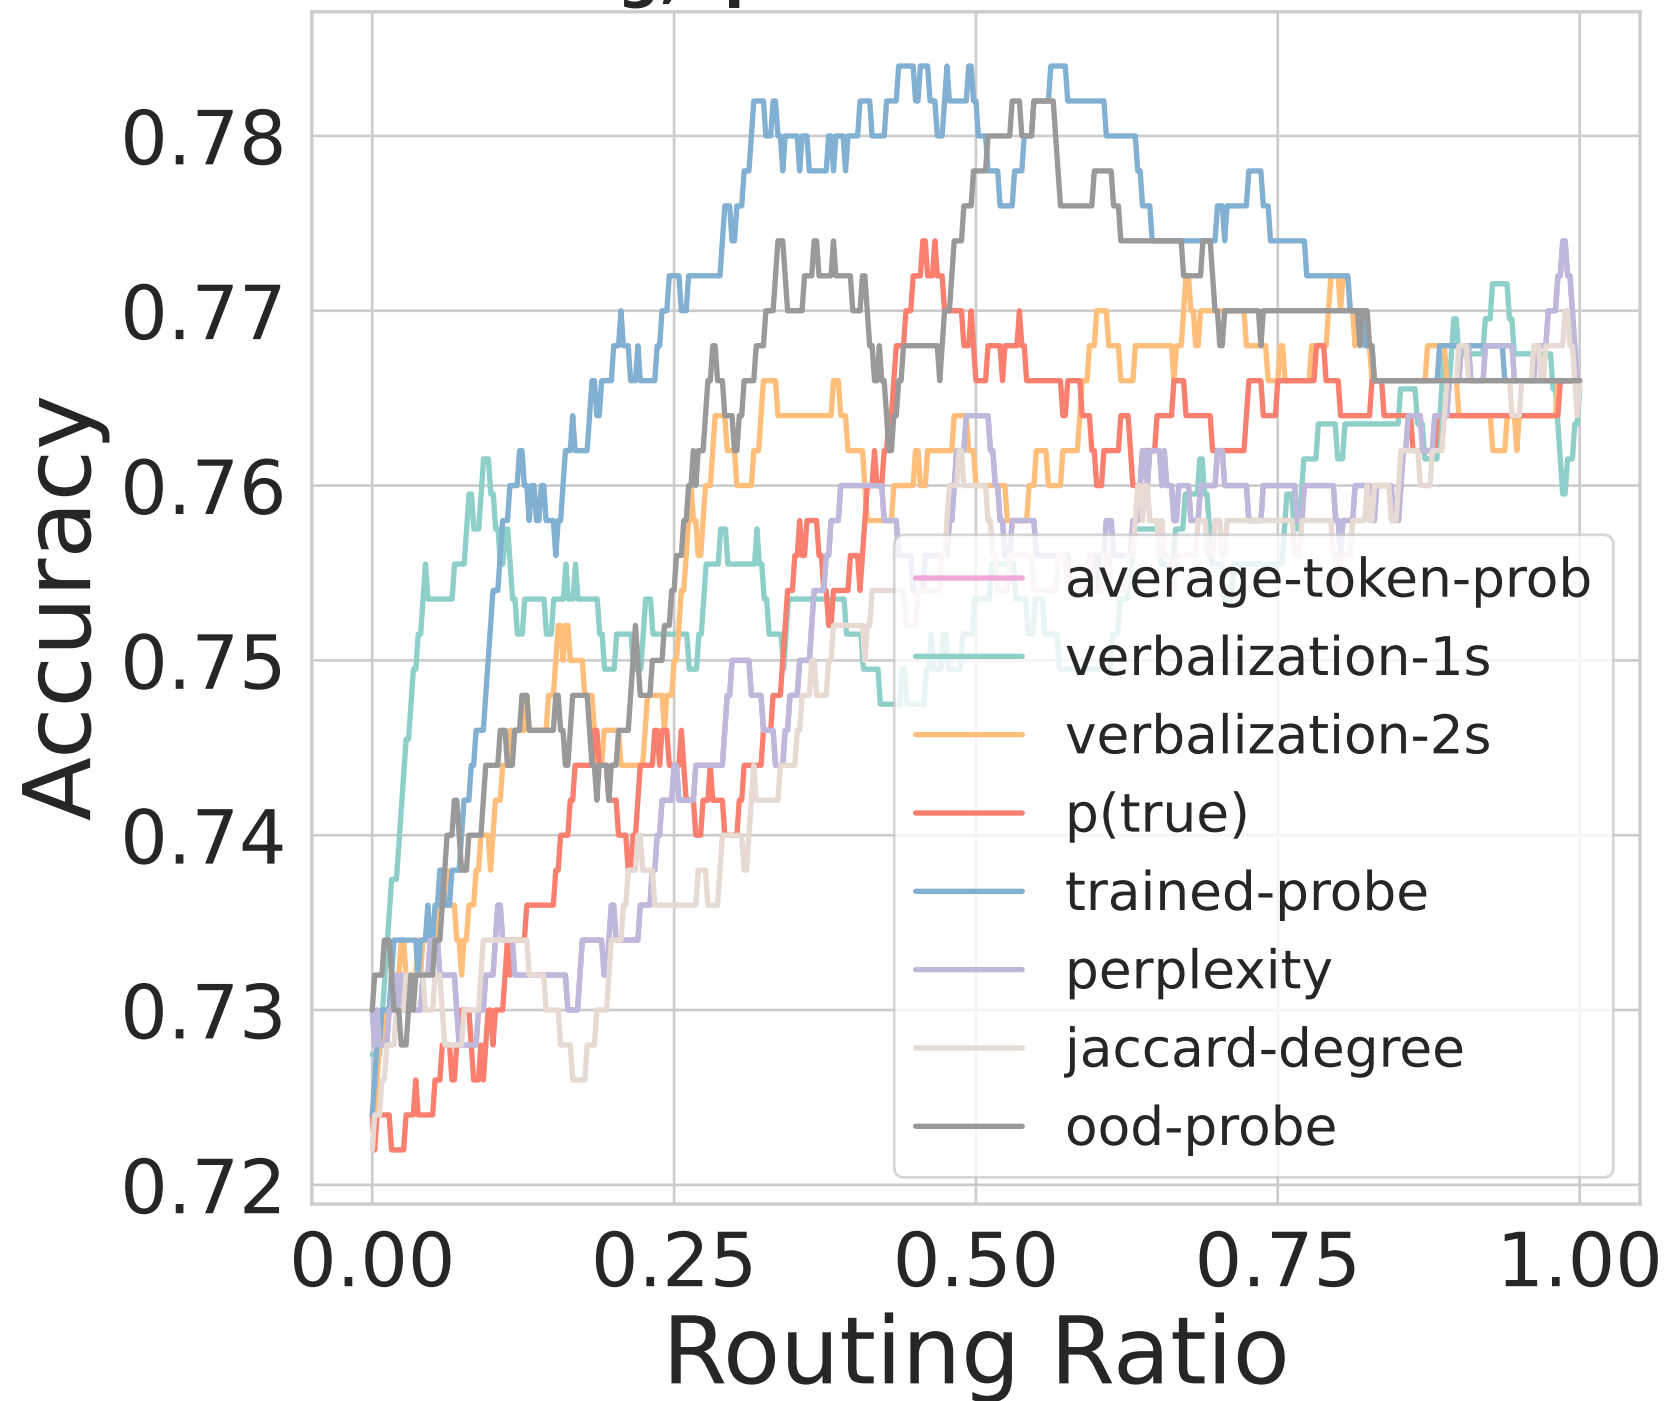

Supplement: supplementary_material [file rr_acc_hellaswag_qwen-2.5-7b_gpt41.pdf › Routing_SLM_LLMs/Uncertainty-based Routing/w_legend/to_gpt41/rr_acc_hellaswag_qwen-2.5-7b_gpt41.pdf]

**HellaSwag, rwkv to GPT-4.1 mini**

Accuracy

0.8  
0.6  
0.4  
0.2

0.0

0.2

0.4

0.6

0.8

1.0

Routing Ratio

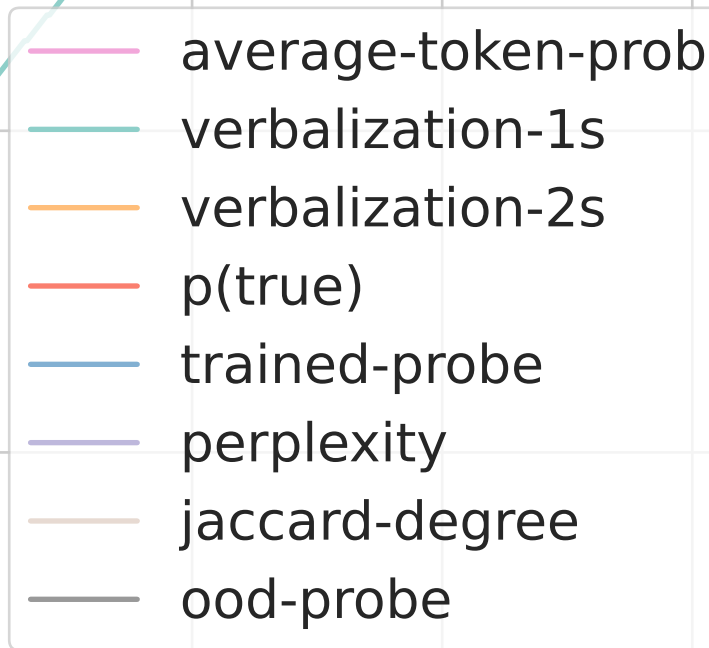

Supplement: supplementary_material [file rr_acc_hellaswag_rwkv_gpt41.pdf › Routing_SLM_LLMs/Uncertainty-based Routing/w_legend/to_gpt41/rr_acc_hellaswag_rwkv_gpt41.pdf]

## MATH-500, Qwen3-0.6B to GPT-4.1 mini

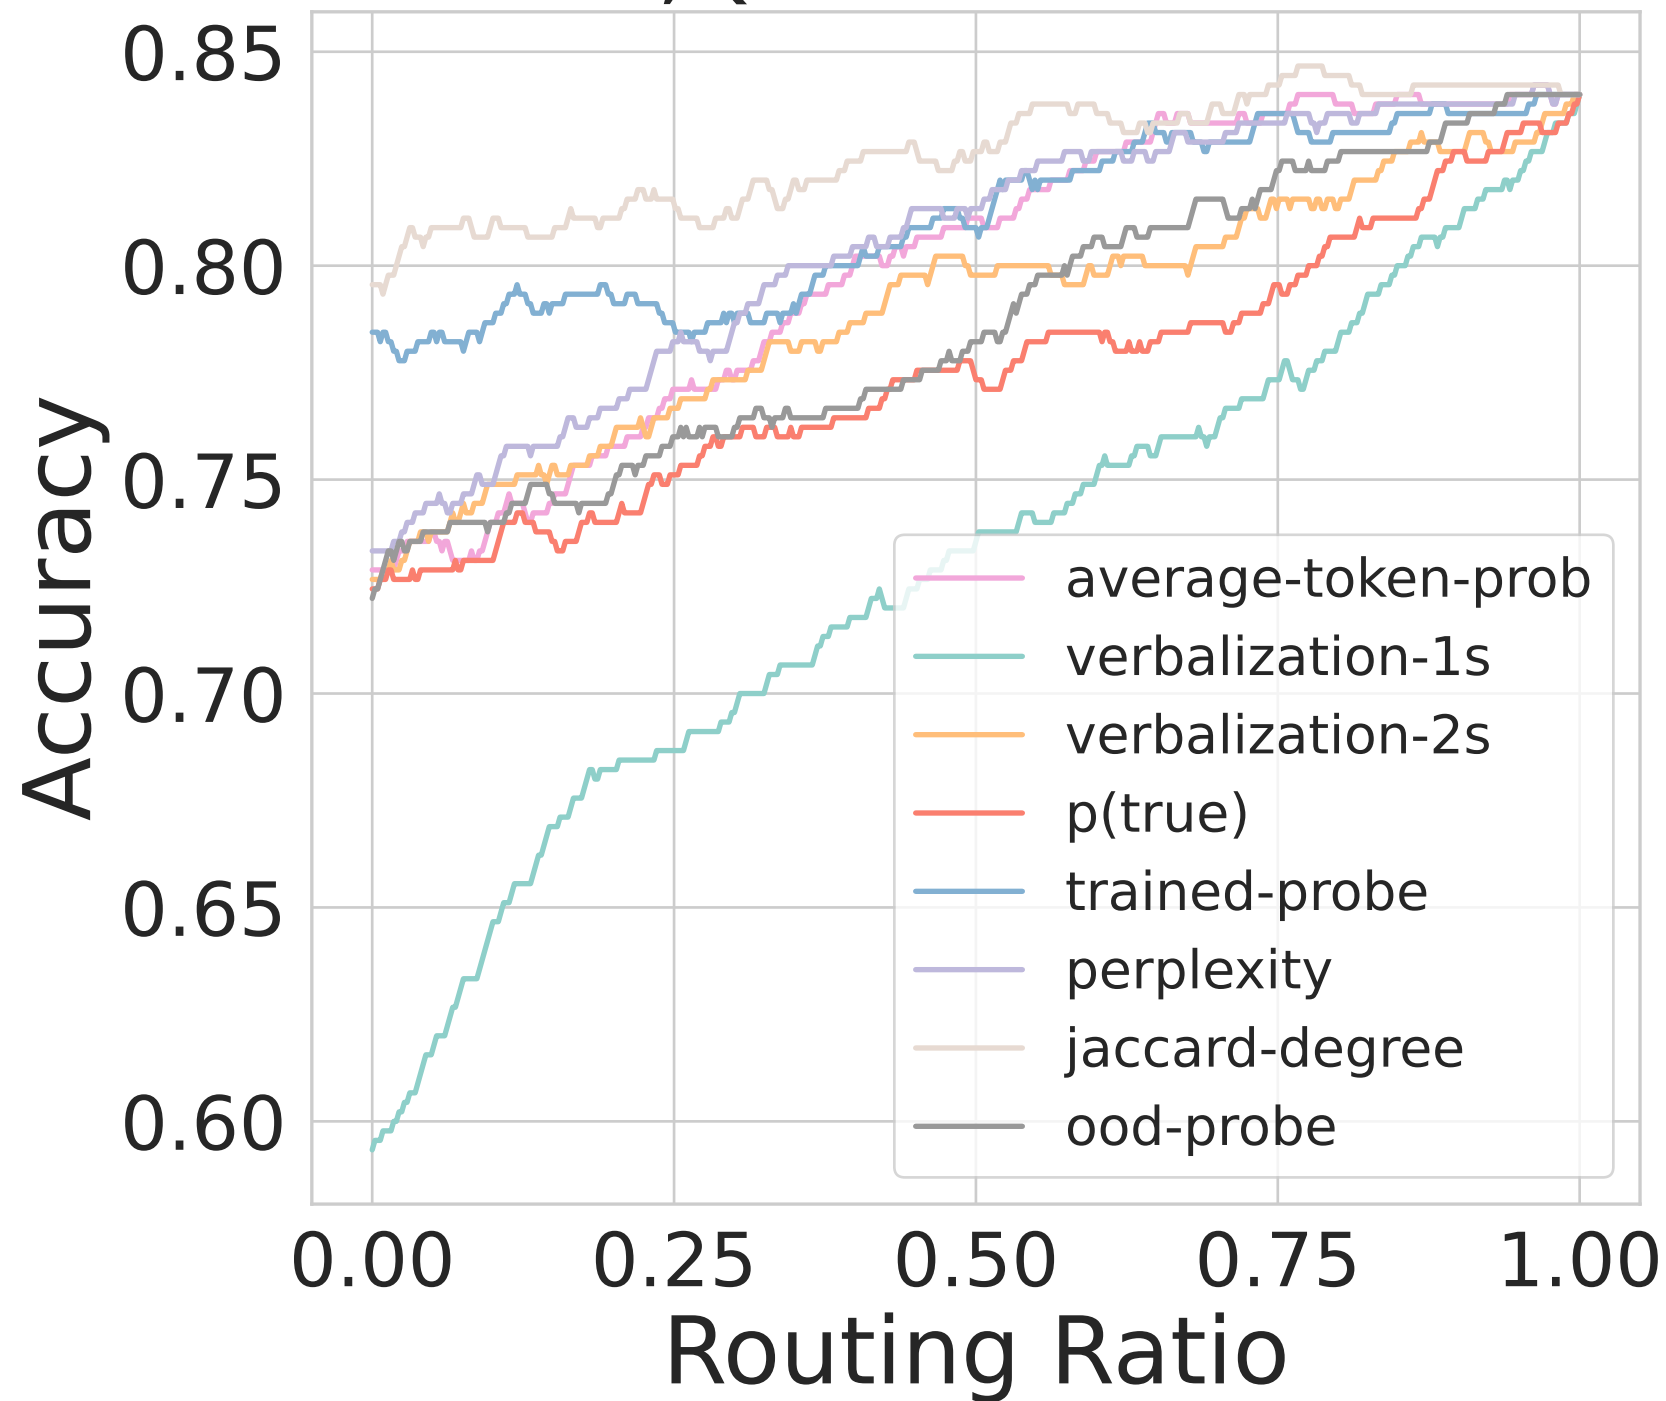

Supplement: supplementary_material [file rr_acc_math_500_Qwen3-0.6B_gpt41.pdf › Routing_SLM_LLMs/Uncertainty-based Routing/w_legend/to_gpt41/rr_acc_math_500_Qwen3-0.6B_gpt41.pdf]

**MATH-500, Qwen3-1.7B to GPT-4.1 mini**

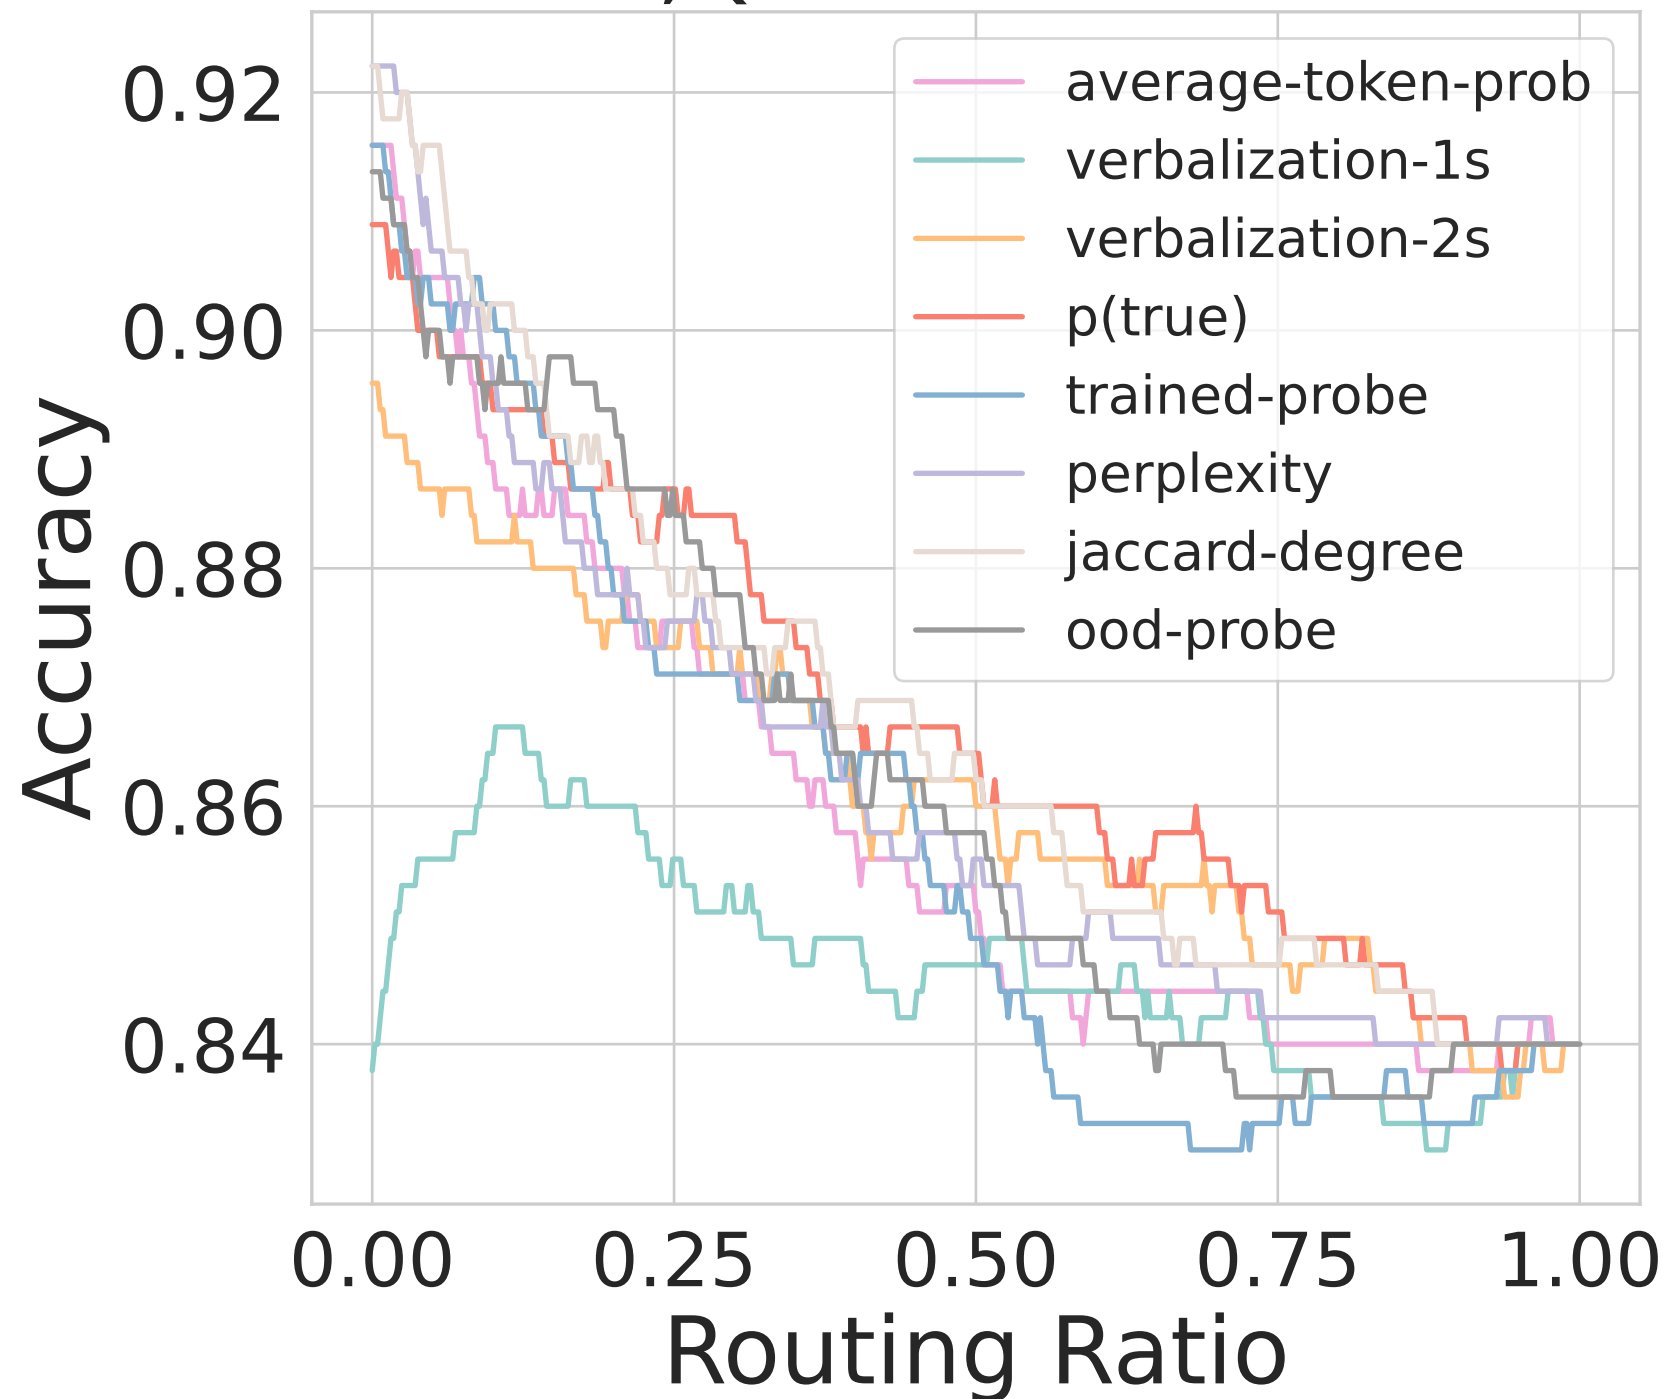

Supplement: supplementary_material [file rr_acc_math_500_Qwen3-1.7B_gpt41.pdf › Routing_SLM_LLMs/Uncertainty-based Routing/w_legend/to_gpt41/rr_acc_math_500_Qwen3-1.7B_gpt41.pdf]

# MATH-500, Qwen3-4B to GPT-4.1 mini

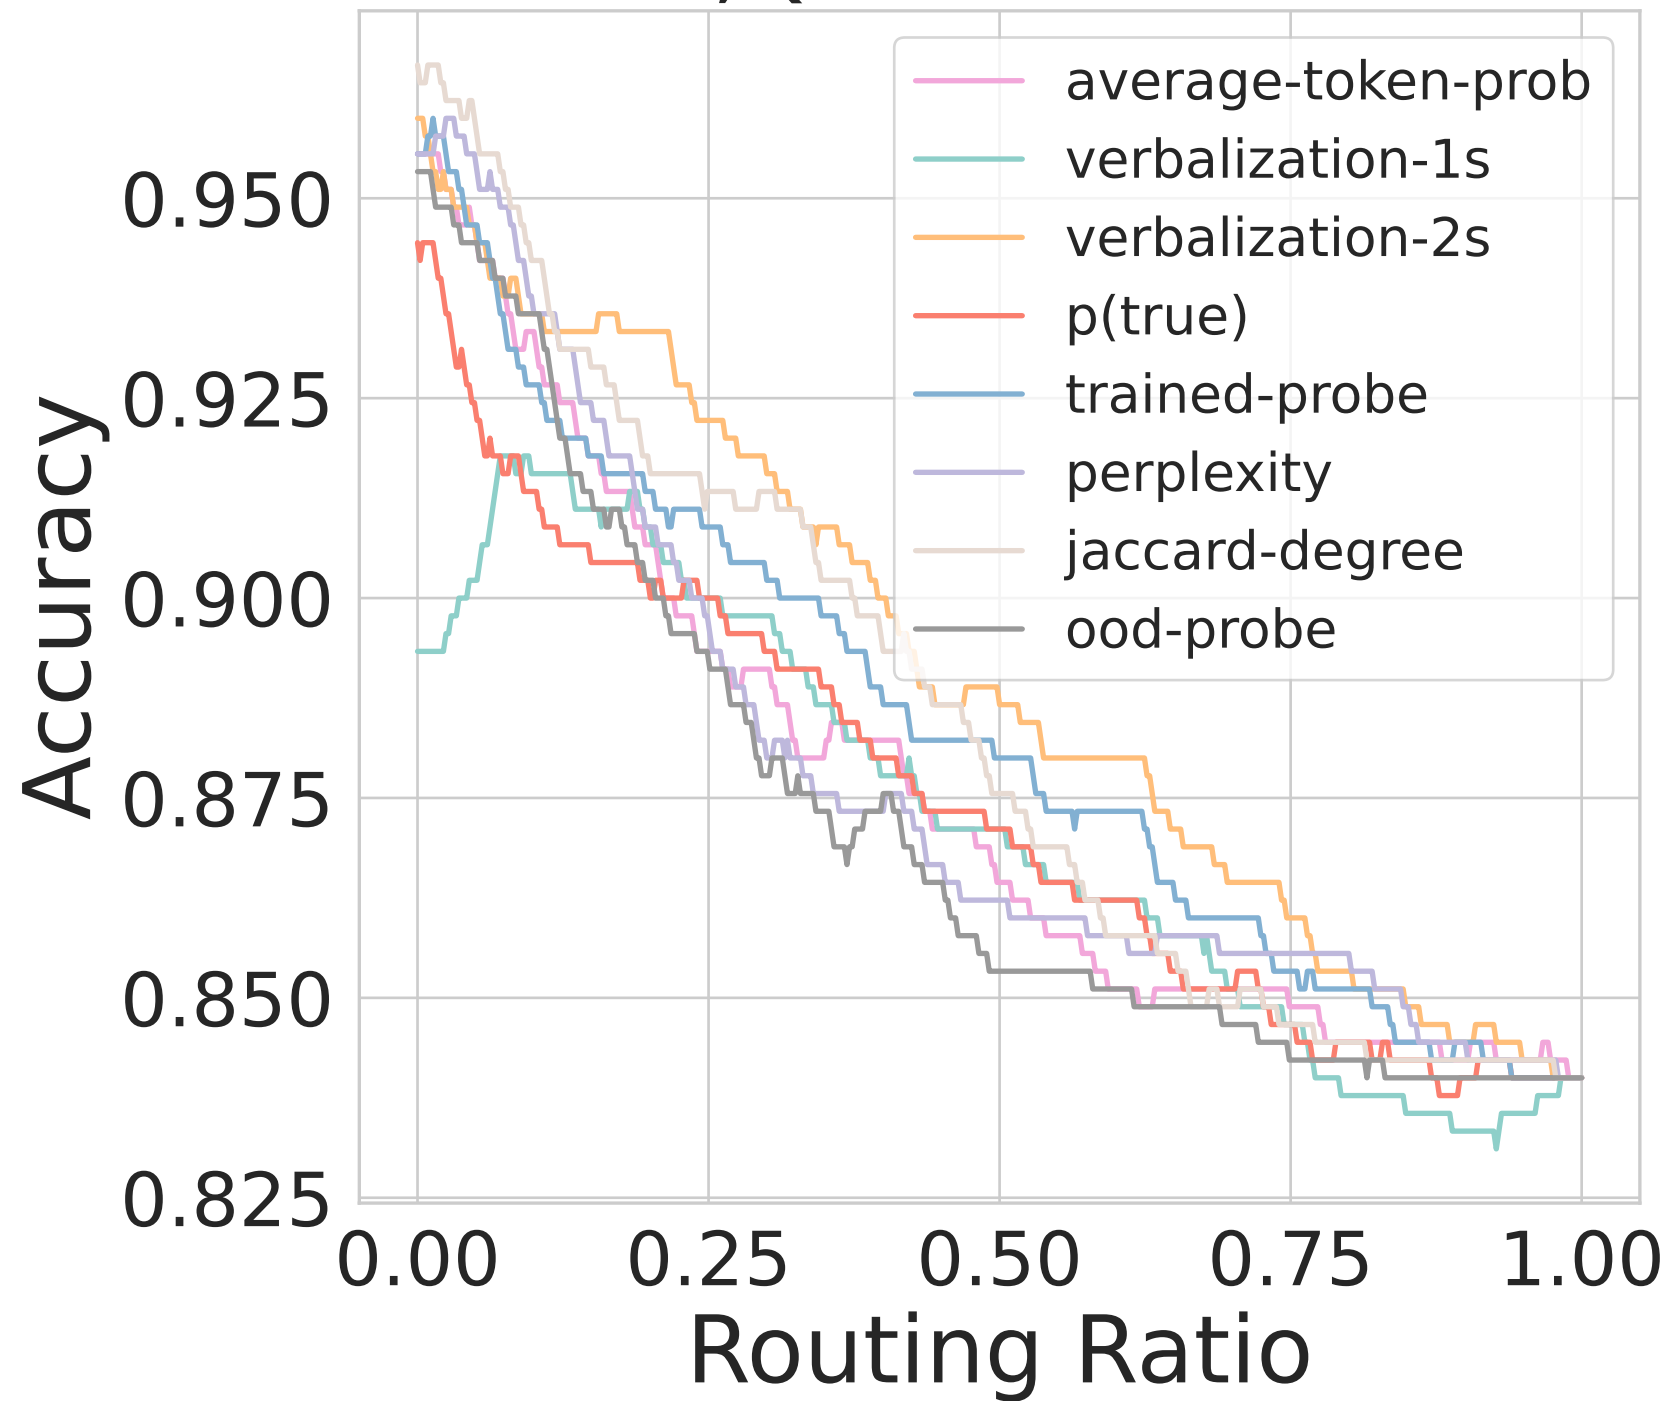

Supplement: supplementary_material [file rr_acc_math_500_Qwen3-4B_gpt41.pdf › Routing_SLM_LLMs/Uncertainty-based Routing/w_legend/to_gpt41/rr_acc_math_500_Qwen3-4B_gpt41.pdf]

## MATH-500, llama-3.2-1b to GPT-4.1 mini

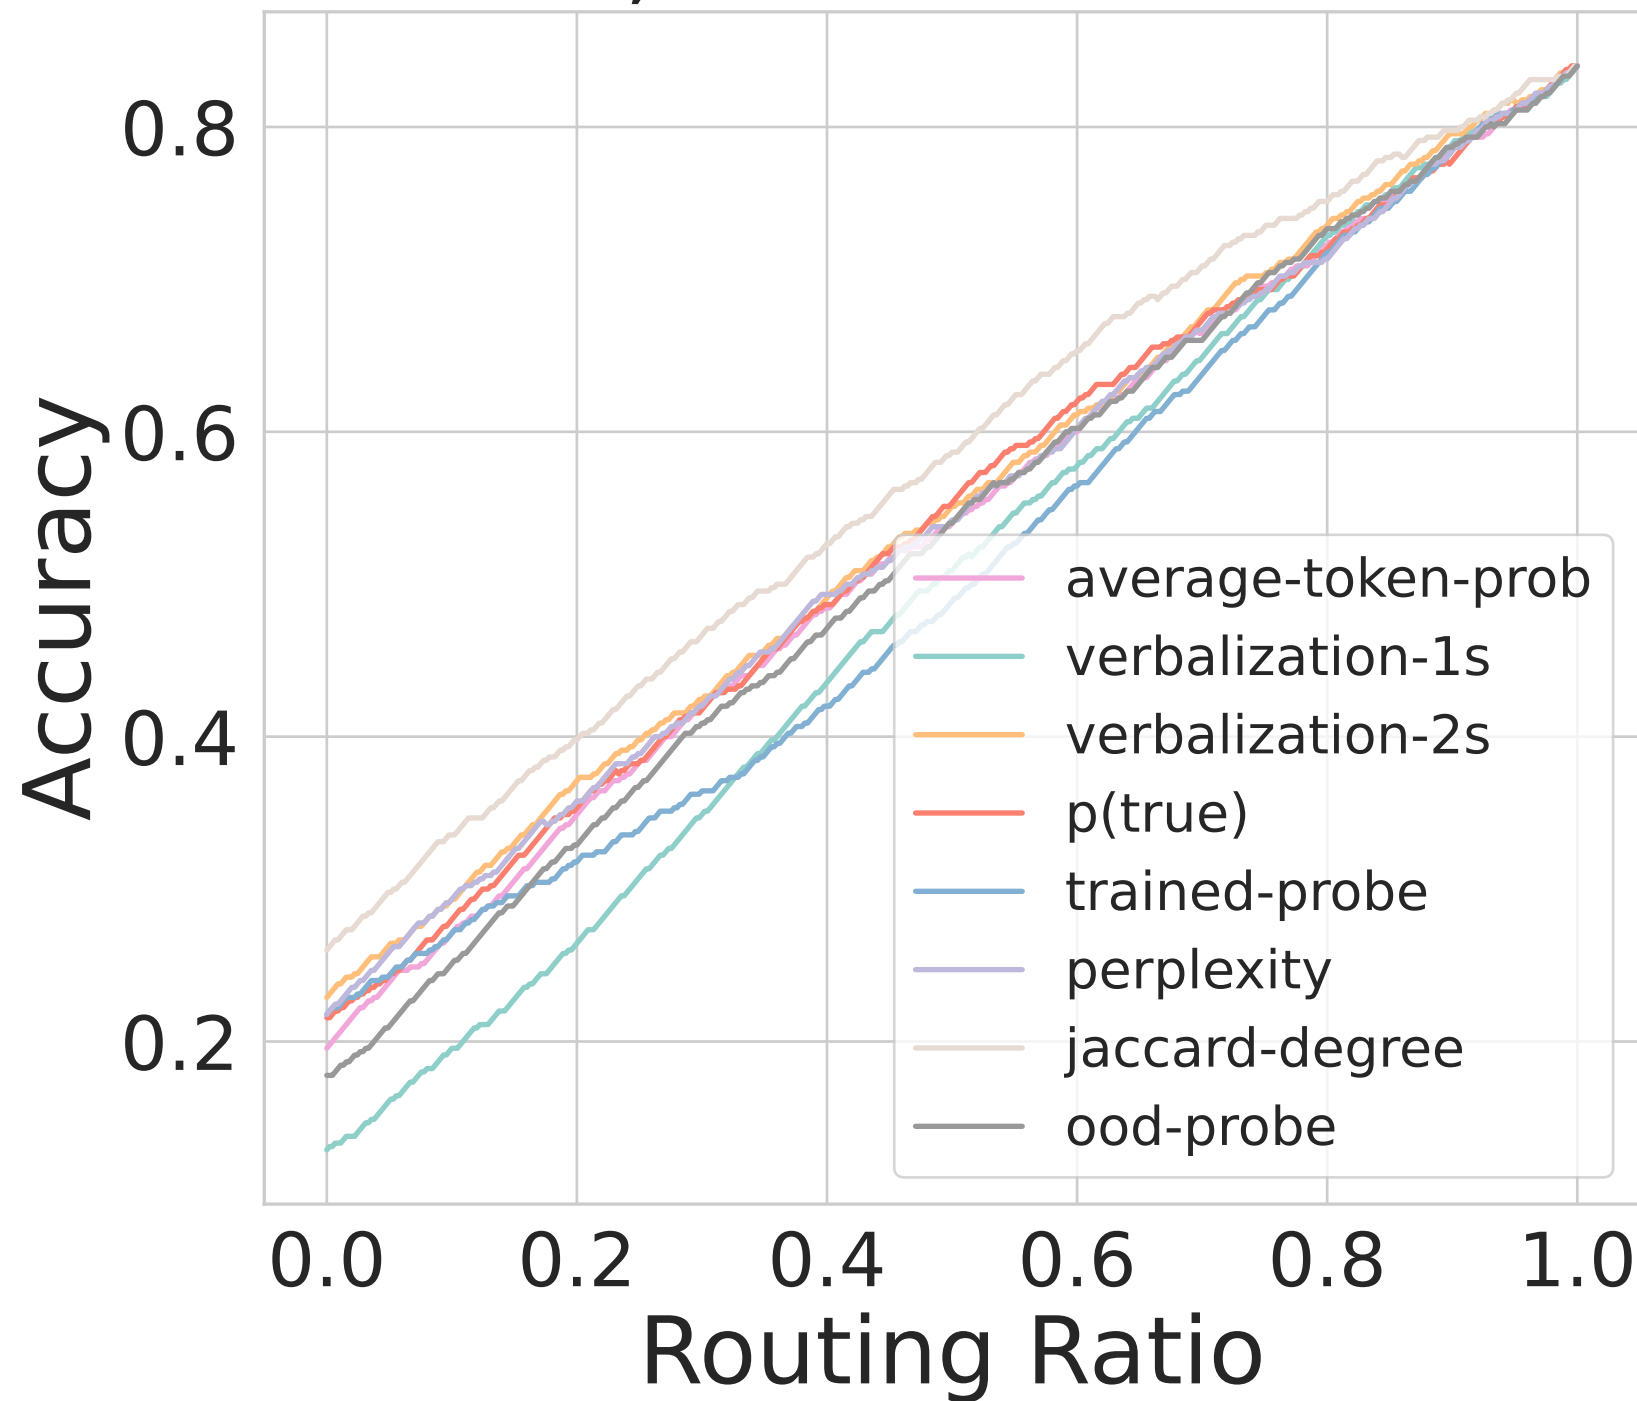

Supplement: supplementary_material [file rr_acc_math_500_llama-3.2-1b_gpt41.pdf › Routing_SLM_LLMs/Uncertainty-based Routing/w_legend/to_gpt41/rr_acc_math_500_llama-3.2-1b_gpt41.pdf]

## MATH-500, llama-3.2-3b to GPT-4.1 mini

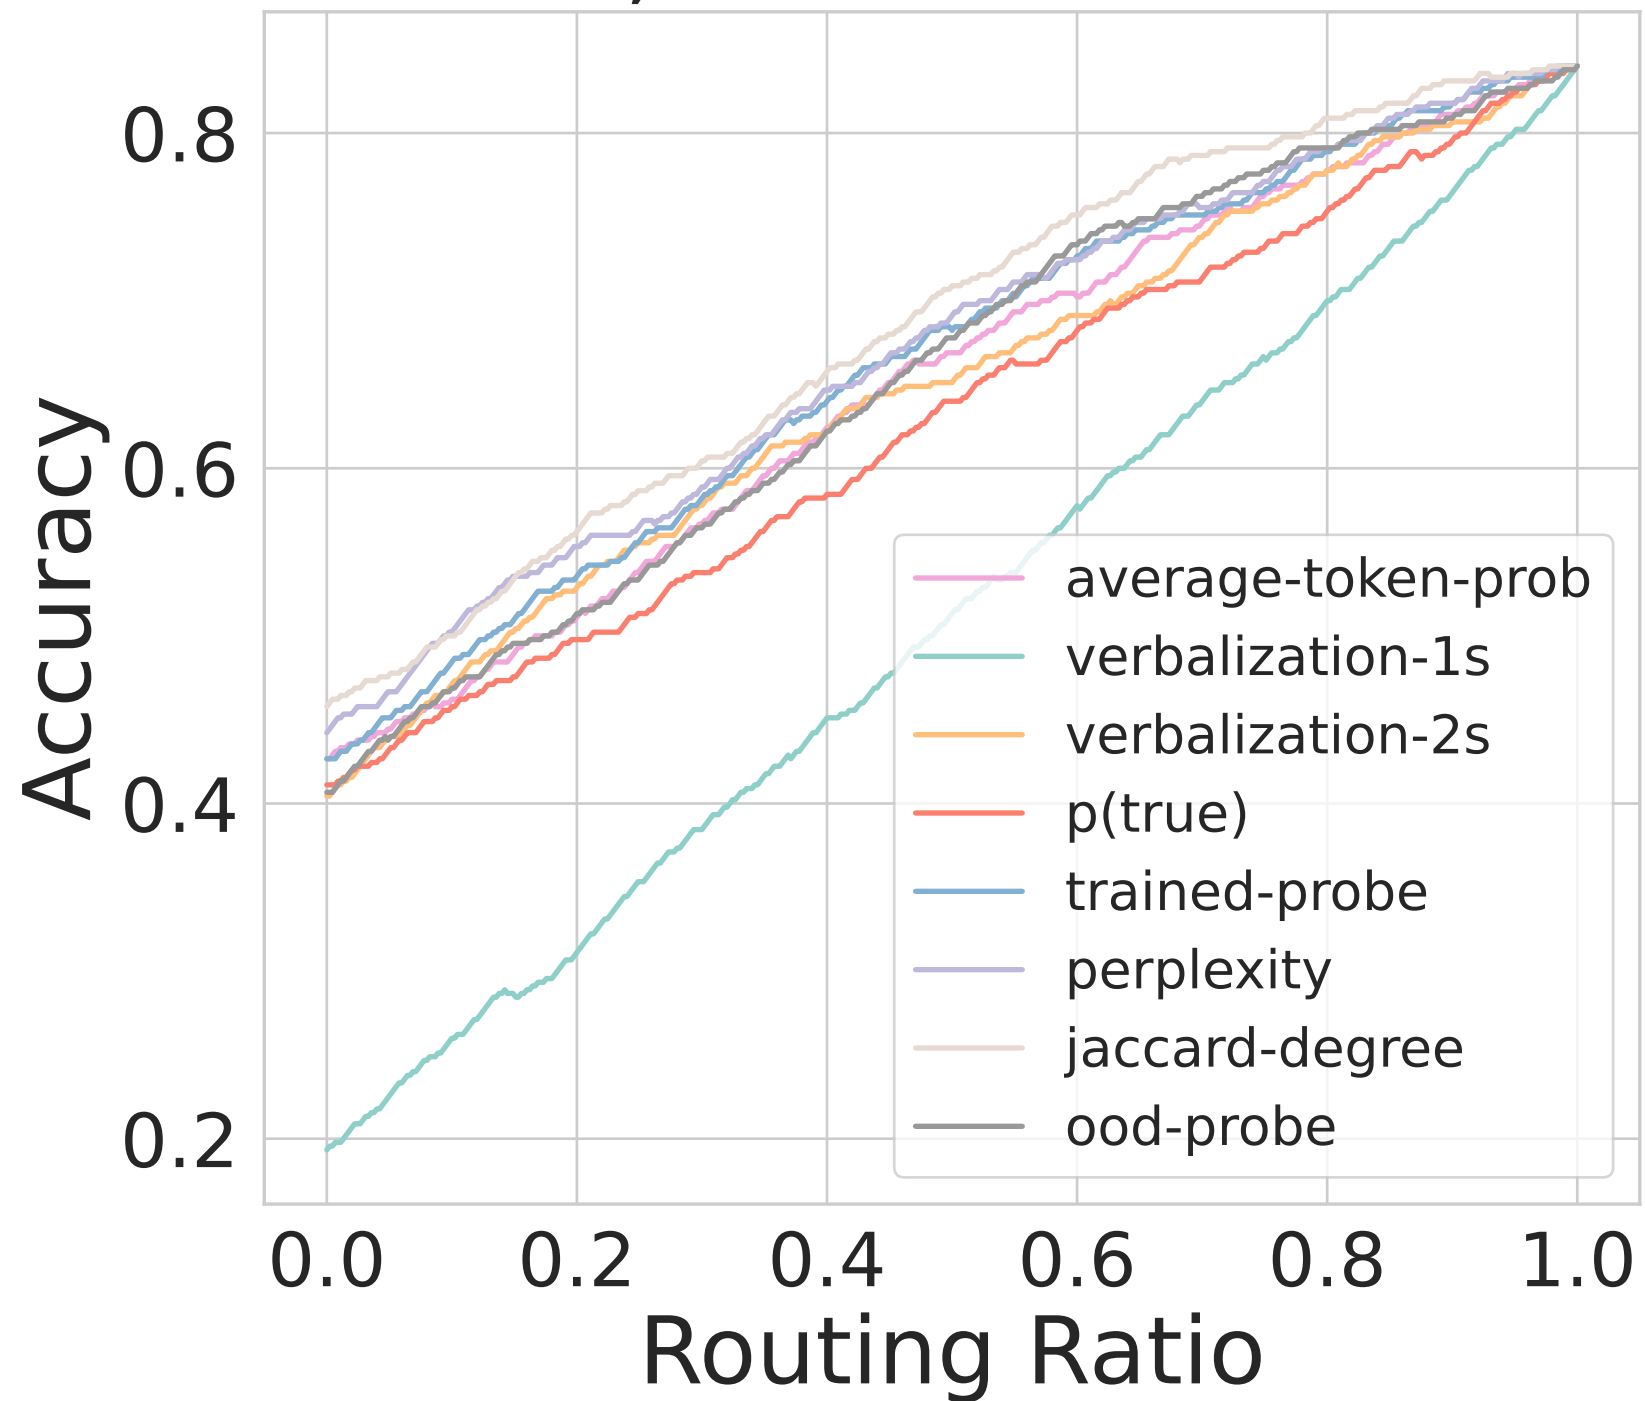

Supplement: supplementary_material [file rr_acc_math_500_llama-3.2-3b_gpt41.pdf › Routing_SLM_LLMs/Uncertainty-based Routing/w_legend/to_gpt41/rr_acc_math_500_llama-3.2-3b_gpt41.pdf]

## MATH-500, mistral-7b to GPT-4.1 mini

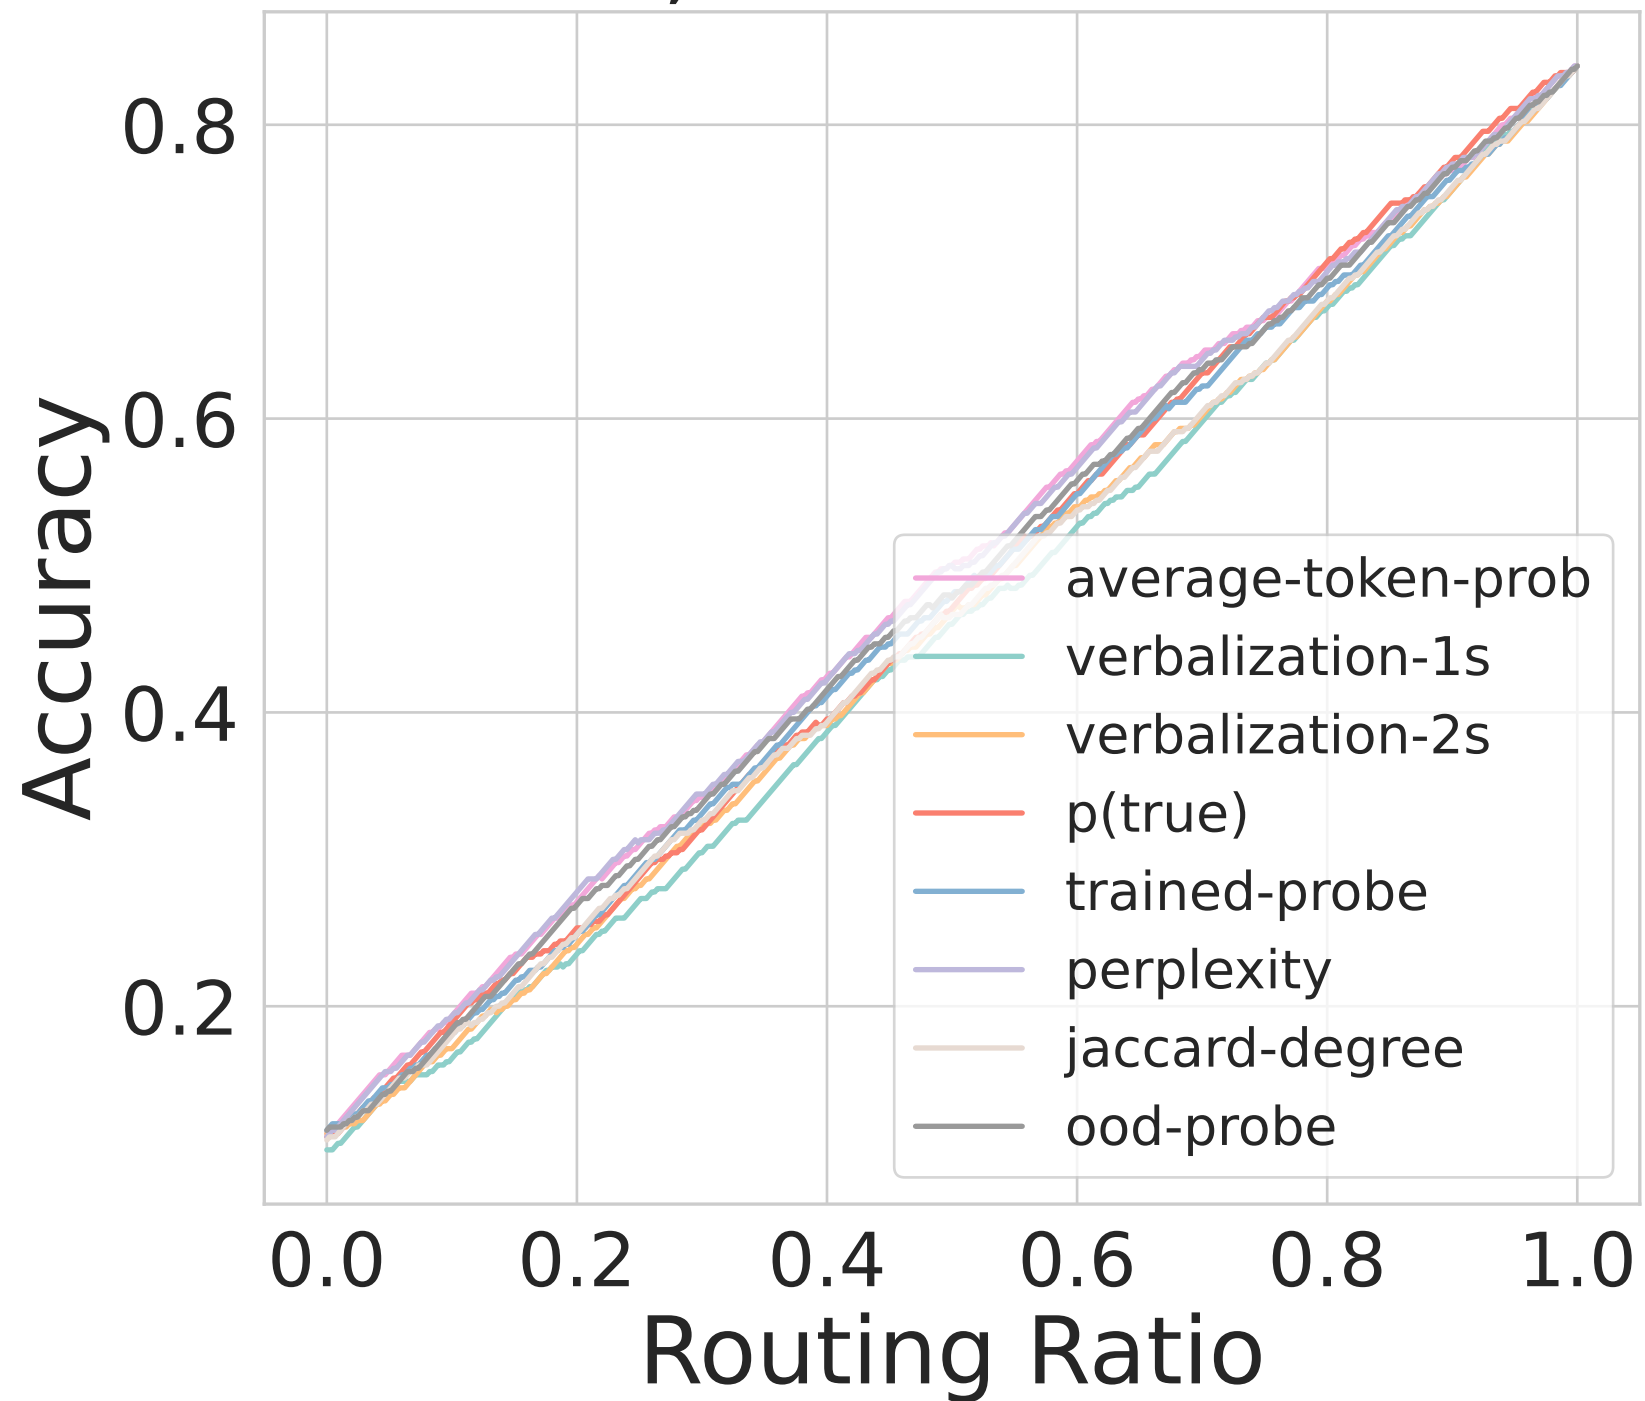

Supplement: supplementary_material [file rr_acc_math_500_mistral-7b_gpt41.pdf › Routing_SLM_LLMs/Uncertainty-based Routing/w_legend/to_gpt41/rr_acc_math_500_mistral-7b_gpt41.pdf]

# MATH-500, phi-3.5-mini to GPT-4.1 mini

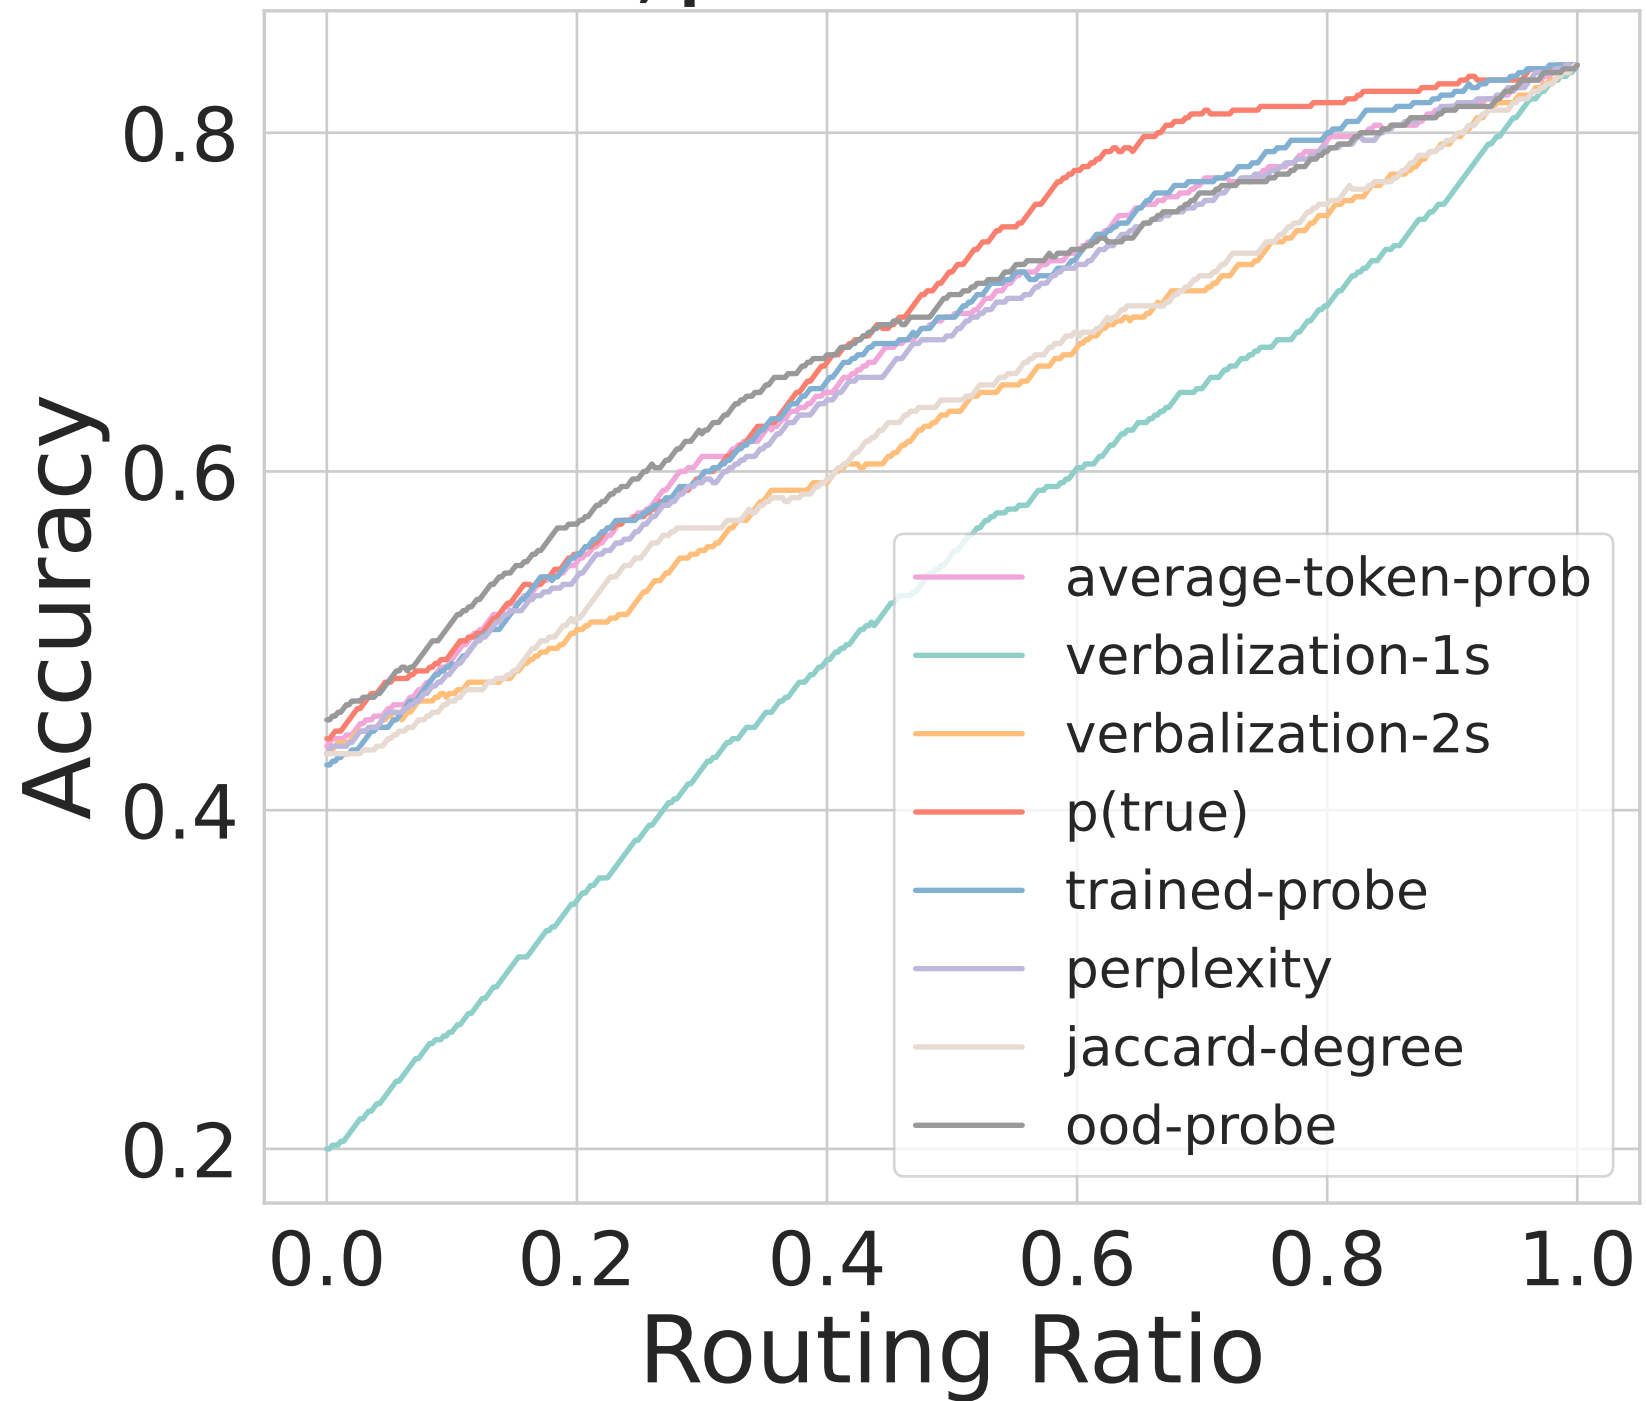

Supplement: supplementary_material [file rr_acc_math_500_phi-3.5-mini_gpt41.pdf › Routing_SLM_LLMs/Uncertainty-based Routing/w_legend/to_gpt41/rr_acc_math_500_phi-3.5-mini_gpt41.pdf]

# MATH-500, phi-4-mini-reasoning to GPT-4.1 mini

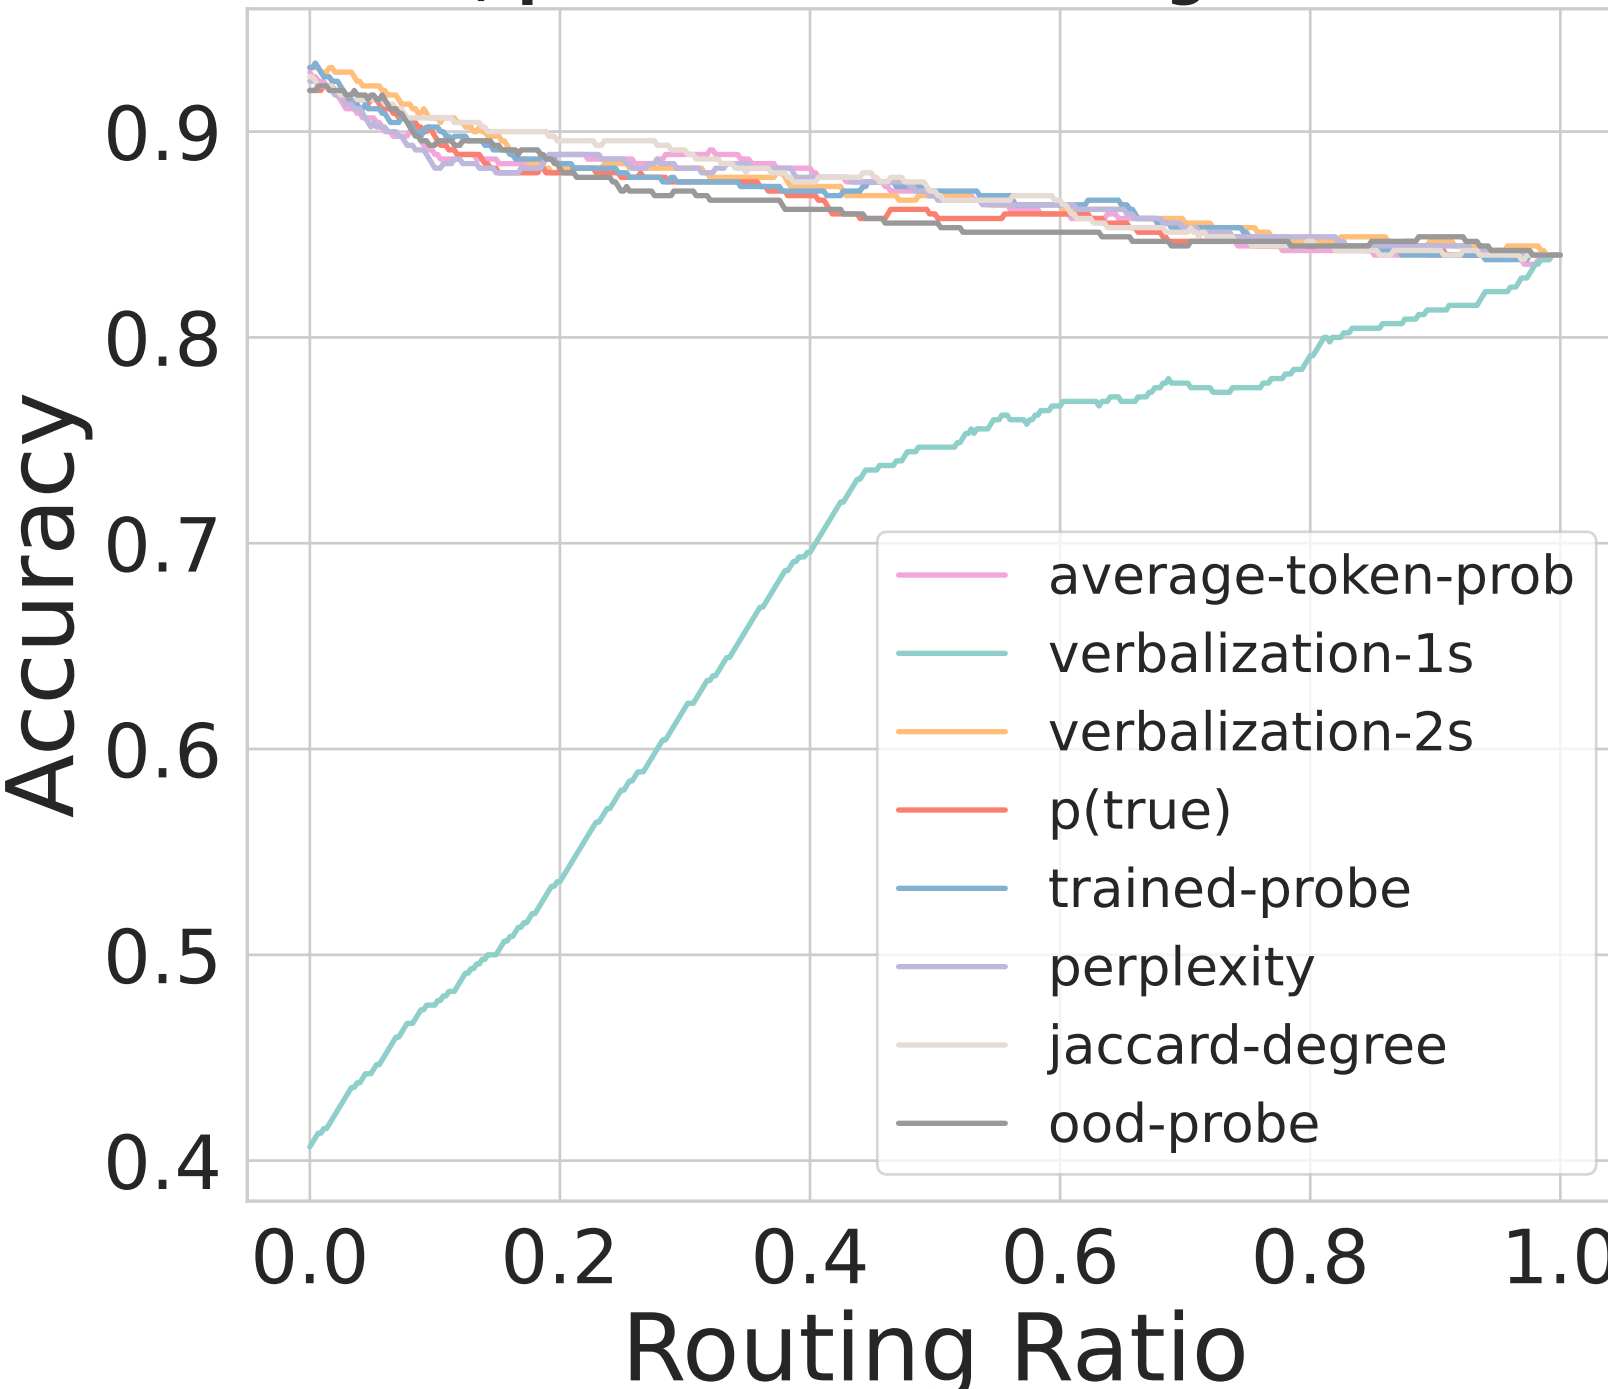

Supplement: supplementary_material [file rr_acc_math_500_phi-4-mini-reasoning_gpt41.pdf › Routing_SLM_LLMs/Uncertainty-based Routing/w_legend/to_gpt41/rr_acc_math_500_phi-4-mini-reasoning_gpt41.pdf]

# MATH-500, rwkv to GPT-4.1 mini

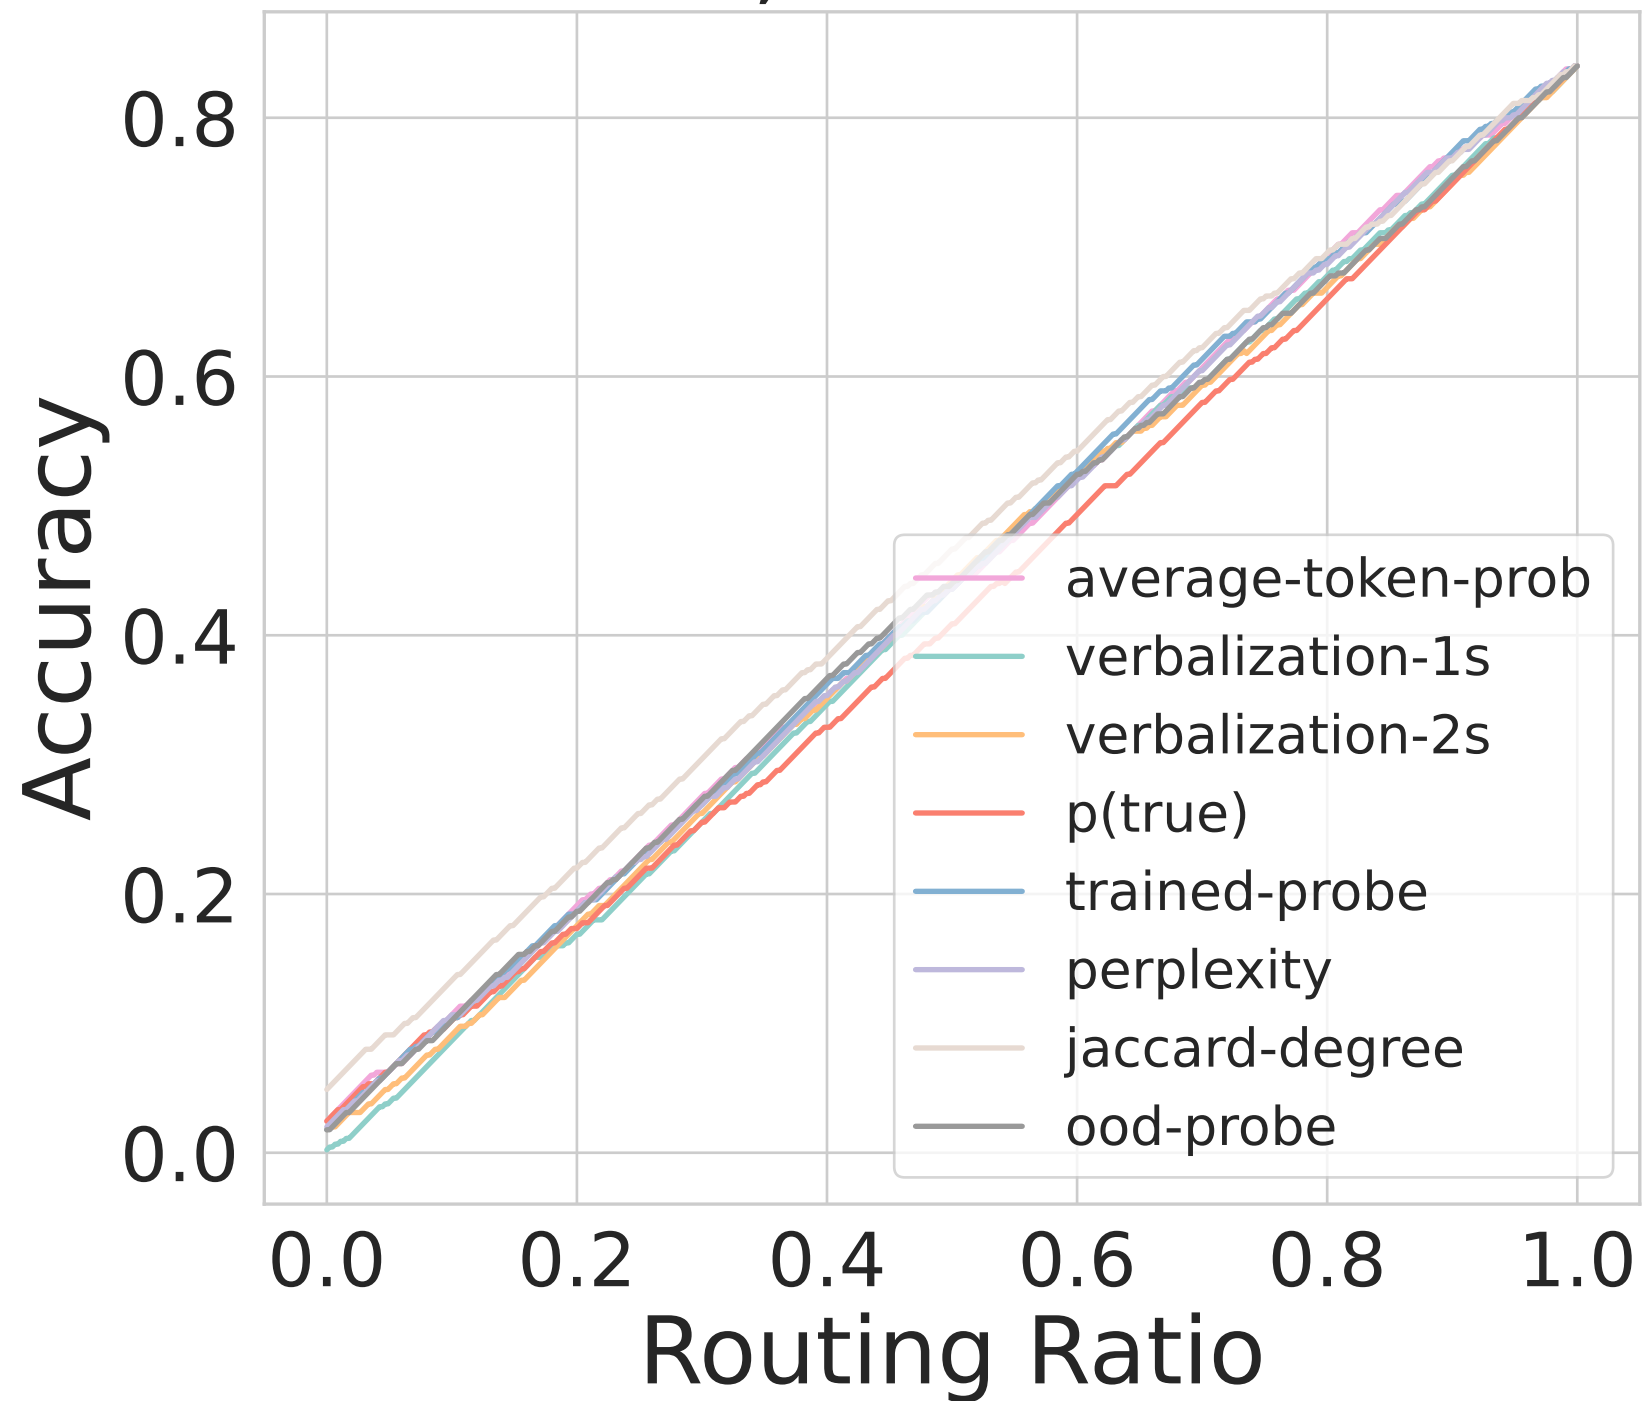

Supplement: supplementary_material [file rr_acc_math_500_rwkv_gpt41.pdf › Routing_SLM_LLMs/Uncertainty-based Routing/w_legend/to_gpt41/rr_acc_math_500_rwkv_gpt41.pdf]

**MMLU, Qwen3-0.6B to GPT-4.1 mini**

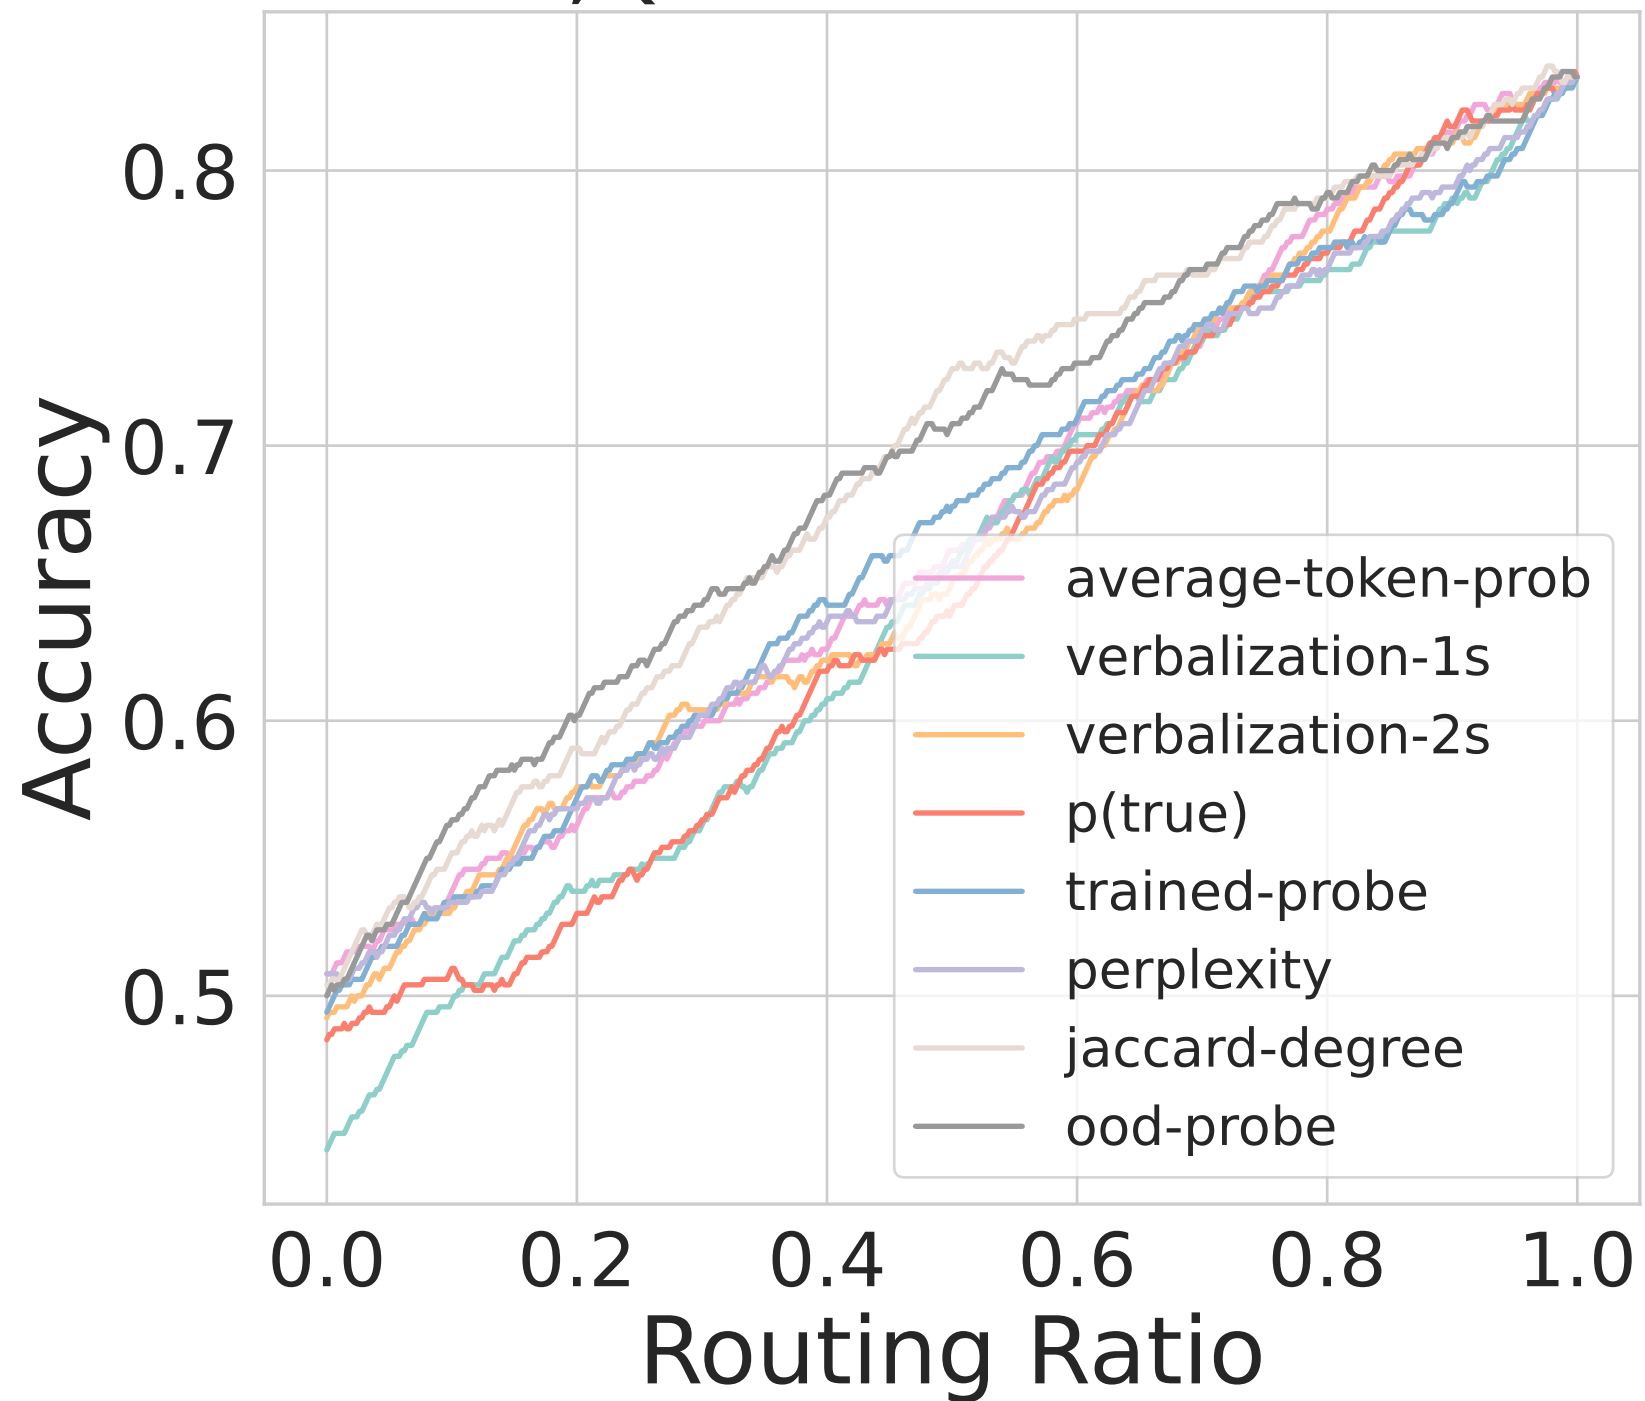

Supplement: supplementary_material [file rr_acc_mmlu_Qwen3-0.6B_gpt41.pdf › Routing_SLM_LLMs/Uncertainty-based Routing/w_legend/to_gpt41/rr_acc_mmlu_Qwen3-0.6B_gpt41.pdf]

# MMLU, Qwen3-4B to GPT-4.1 mini

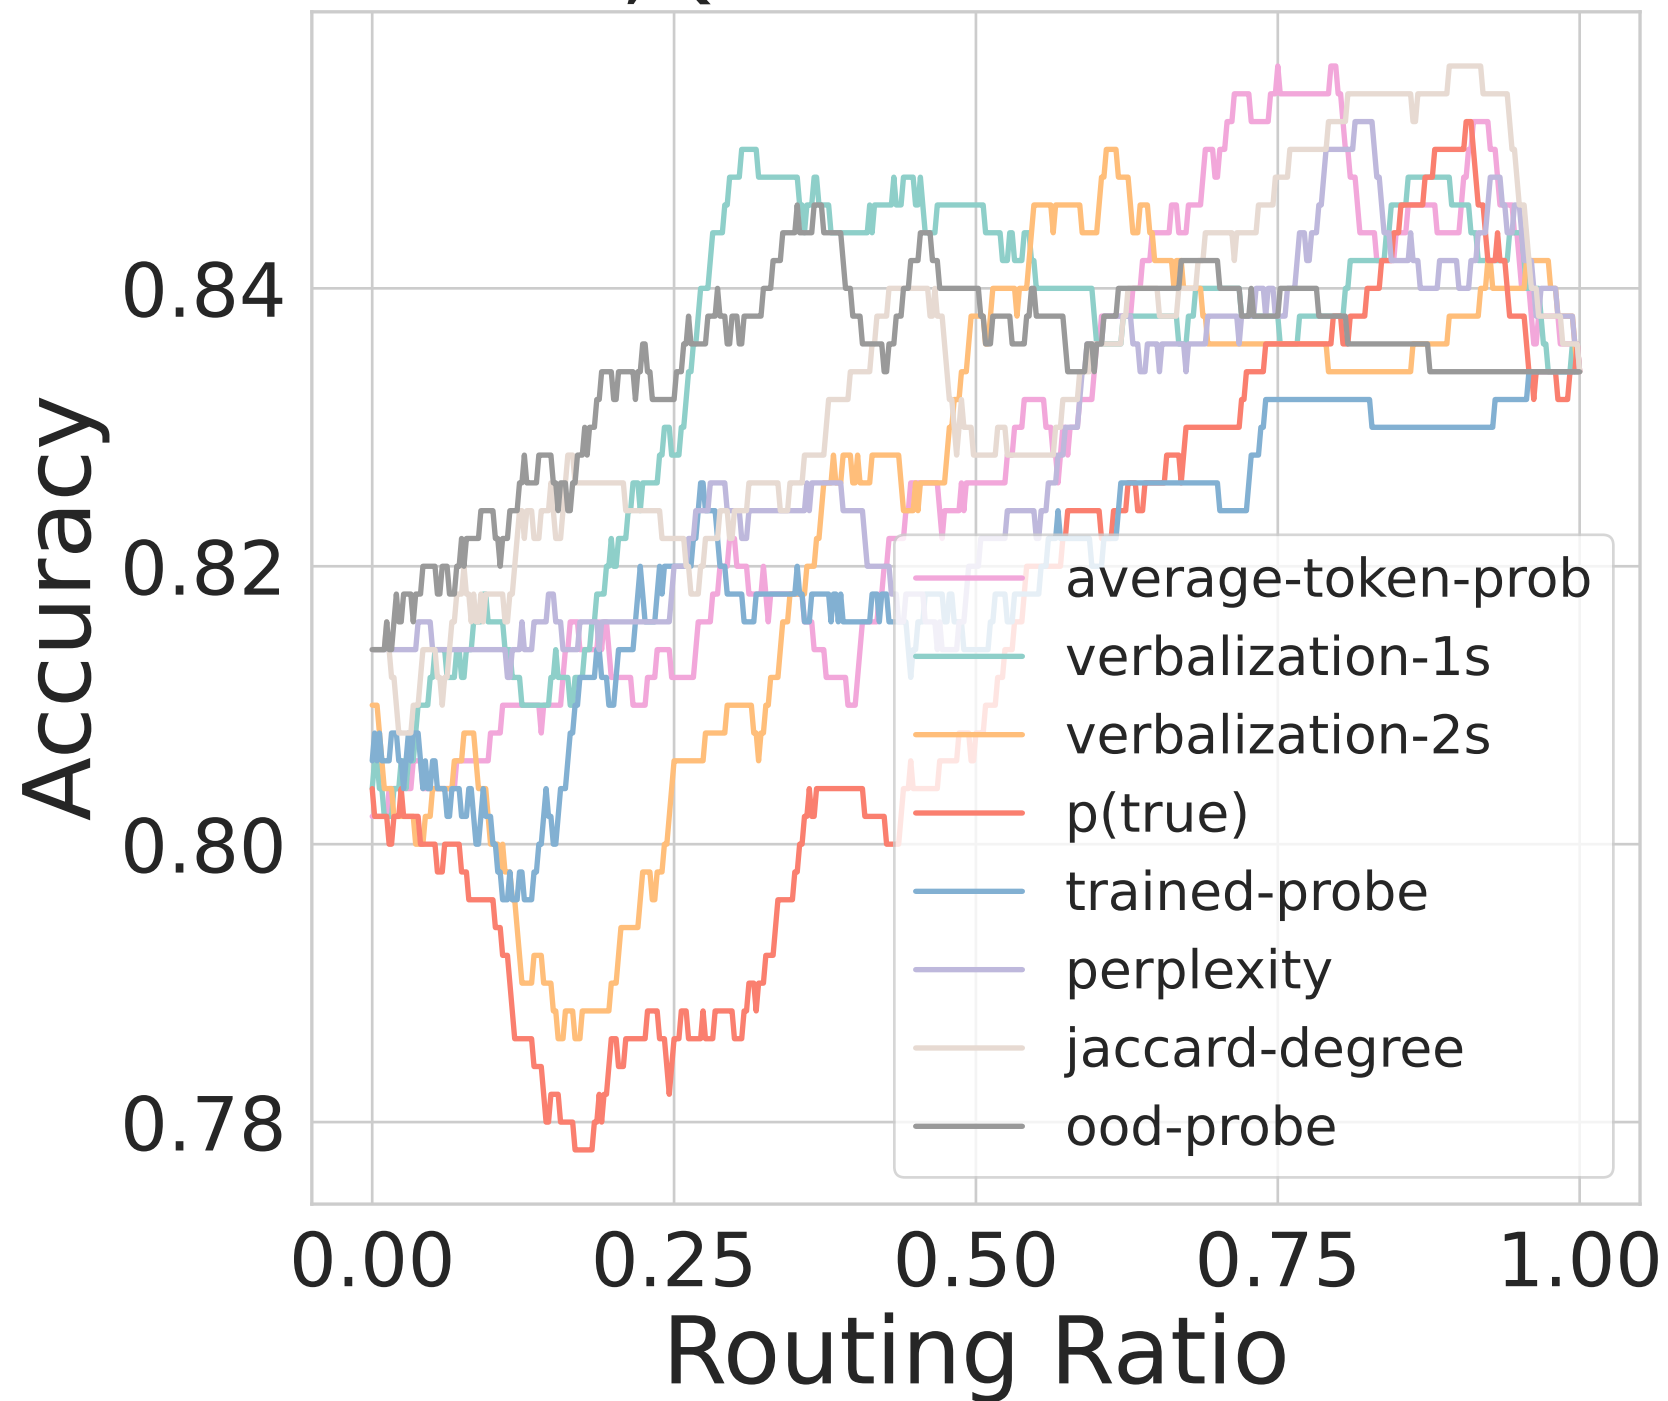

Supplement: supplementary_material [file rr_acc_mmlu_Qwen3-4B_gpt41.pdf › Routing_SLM_LLMs/Uncertainty-based Routing/w_legend/to_gpt41/rr_acc_mmlu_Qwen3-4B_gpt41.pdf]

## MMLU, granite-3.1-8b to GPT-4.1 mini

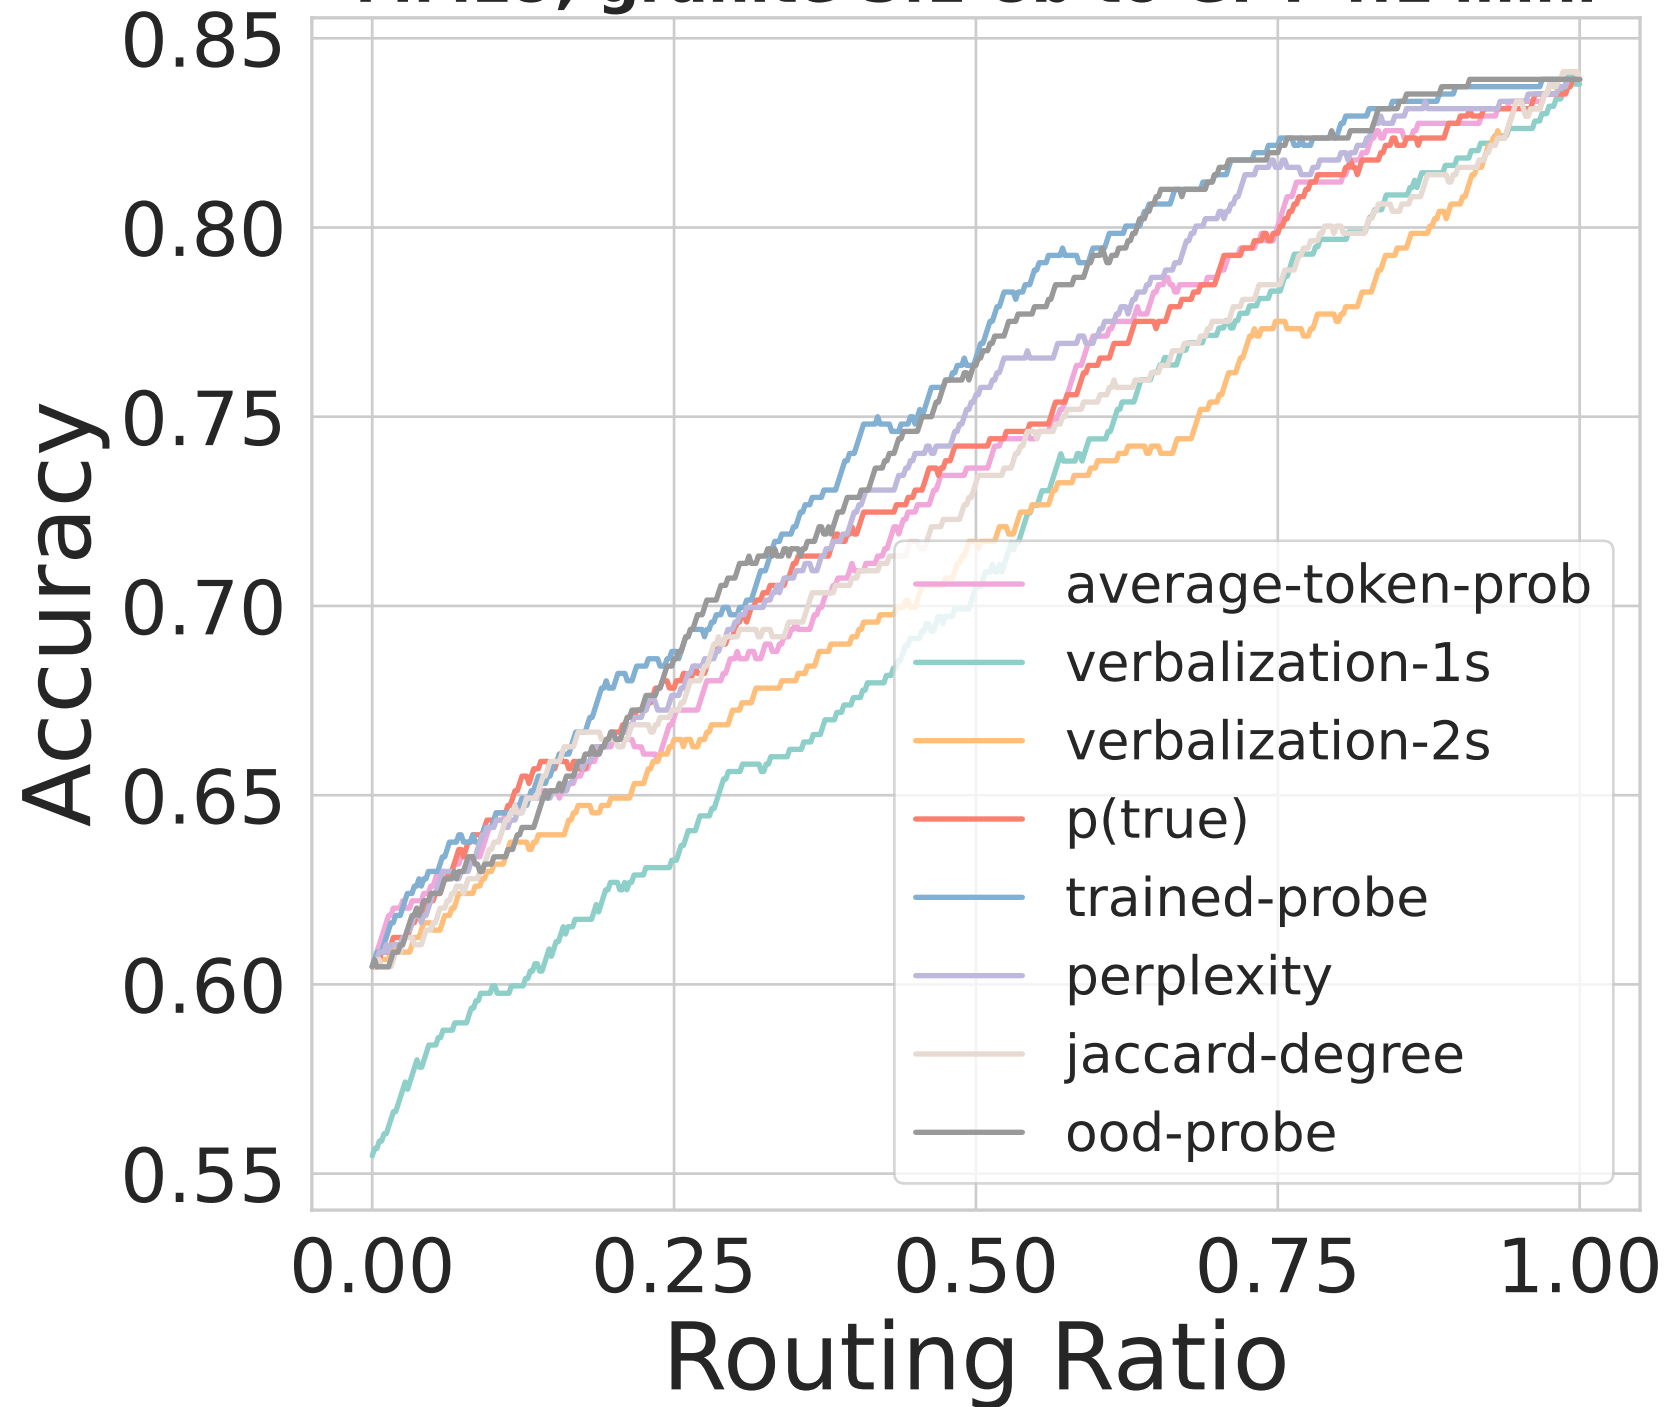

Supplement: supplementary_material [file rr_acc_mmlu_granite-3.1-8b_gpt41.pdf › Routing_SLM_LLMs/Uncertainty-based Routing/w_legend/to_gpt41/rr_acc_mmlu_granite-3.1-8b_gpt41.pdf]

**MMLU, llama-3.2-1b to GPT-4.1 mini**

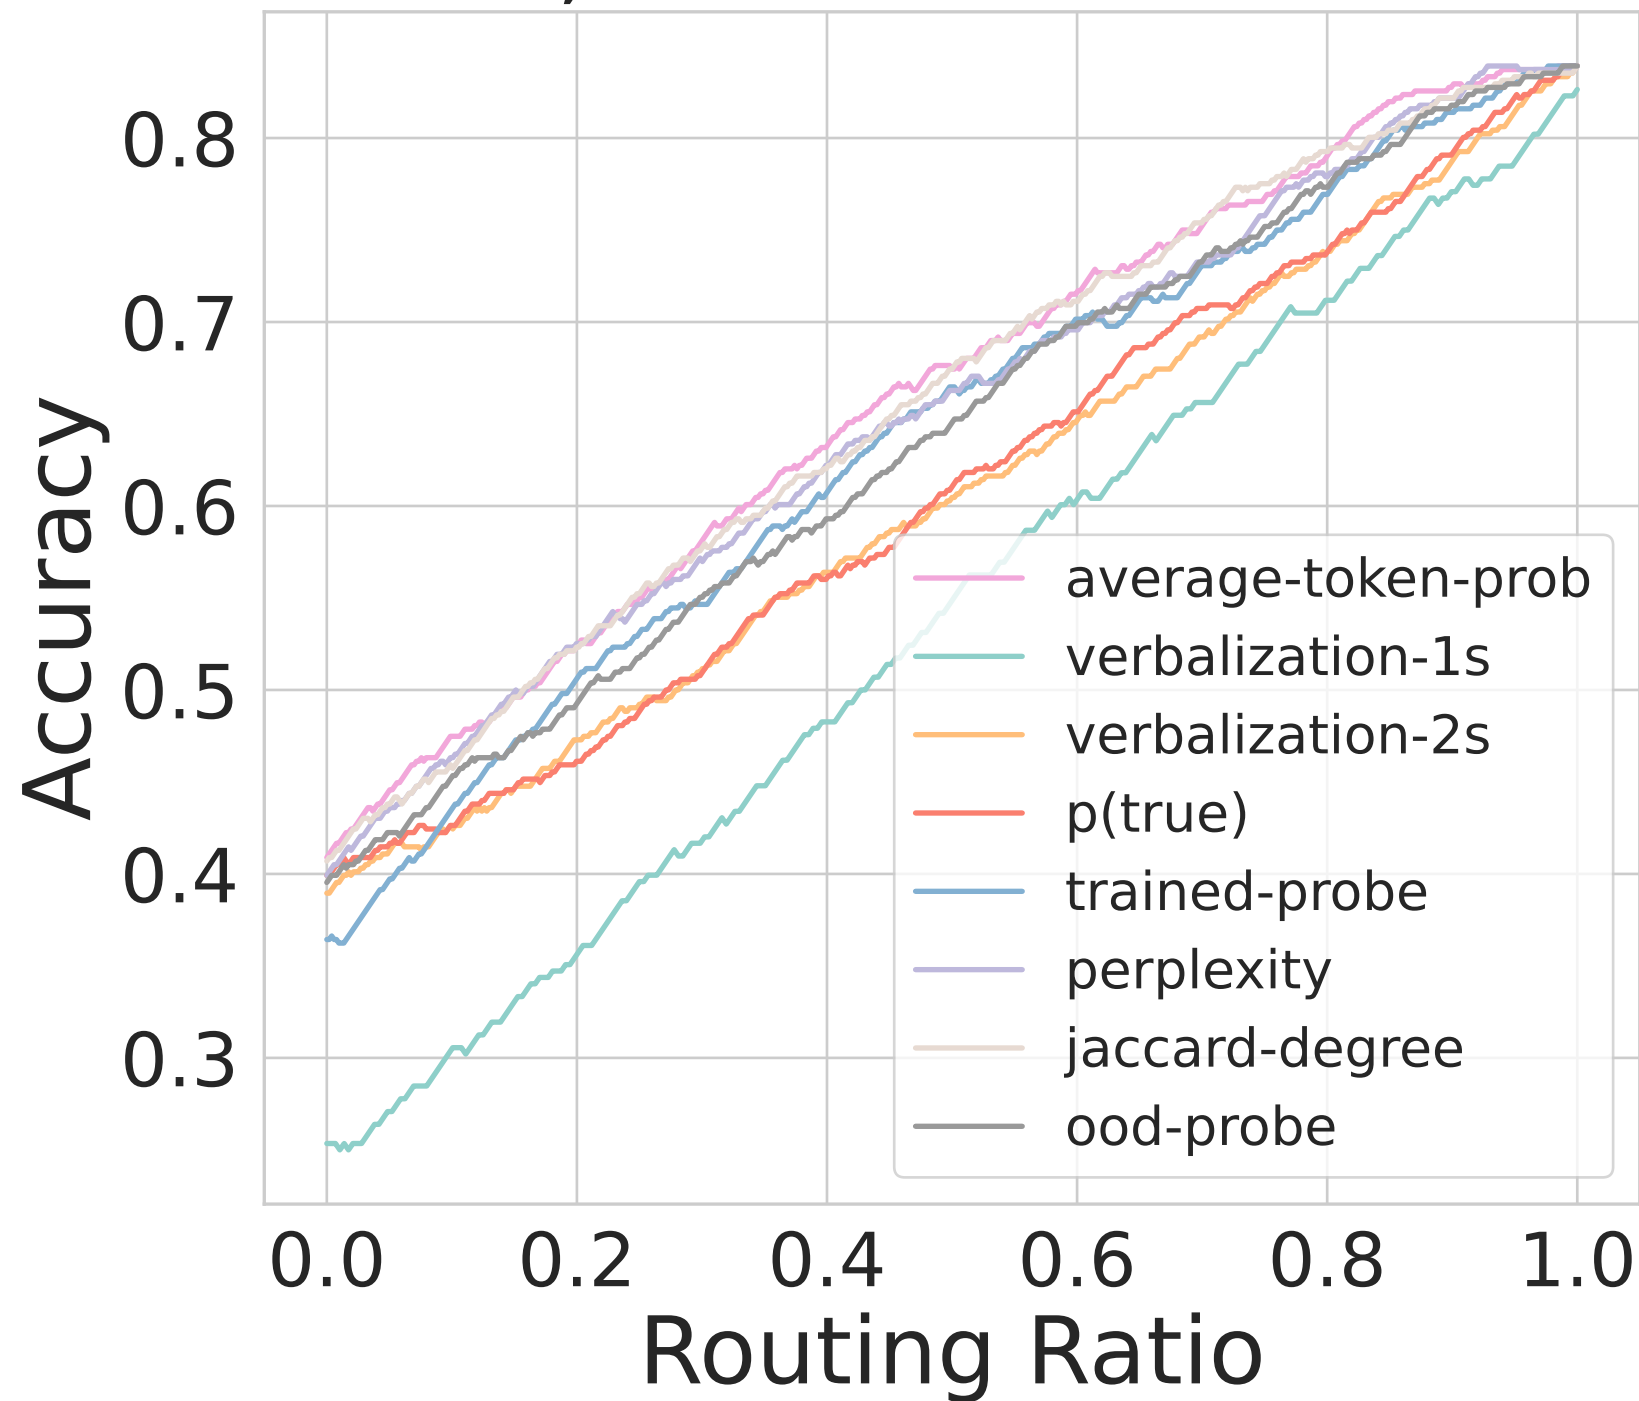

Supplement: supplementary_material [file rr_acc_mmlu_llama-3.2-1b_gpt41.pdf › Routing_SLM_LLMs/Uncertainty-based Routing/w_legend/to_gpt41/rr_acc_mmlu_llama-3.2-1b_gpt41.pdf]

## MMLU, llama-3.2-3b to GPT-4.1 mini

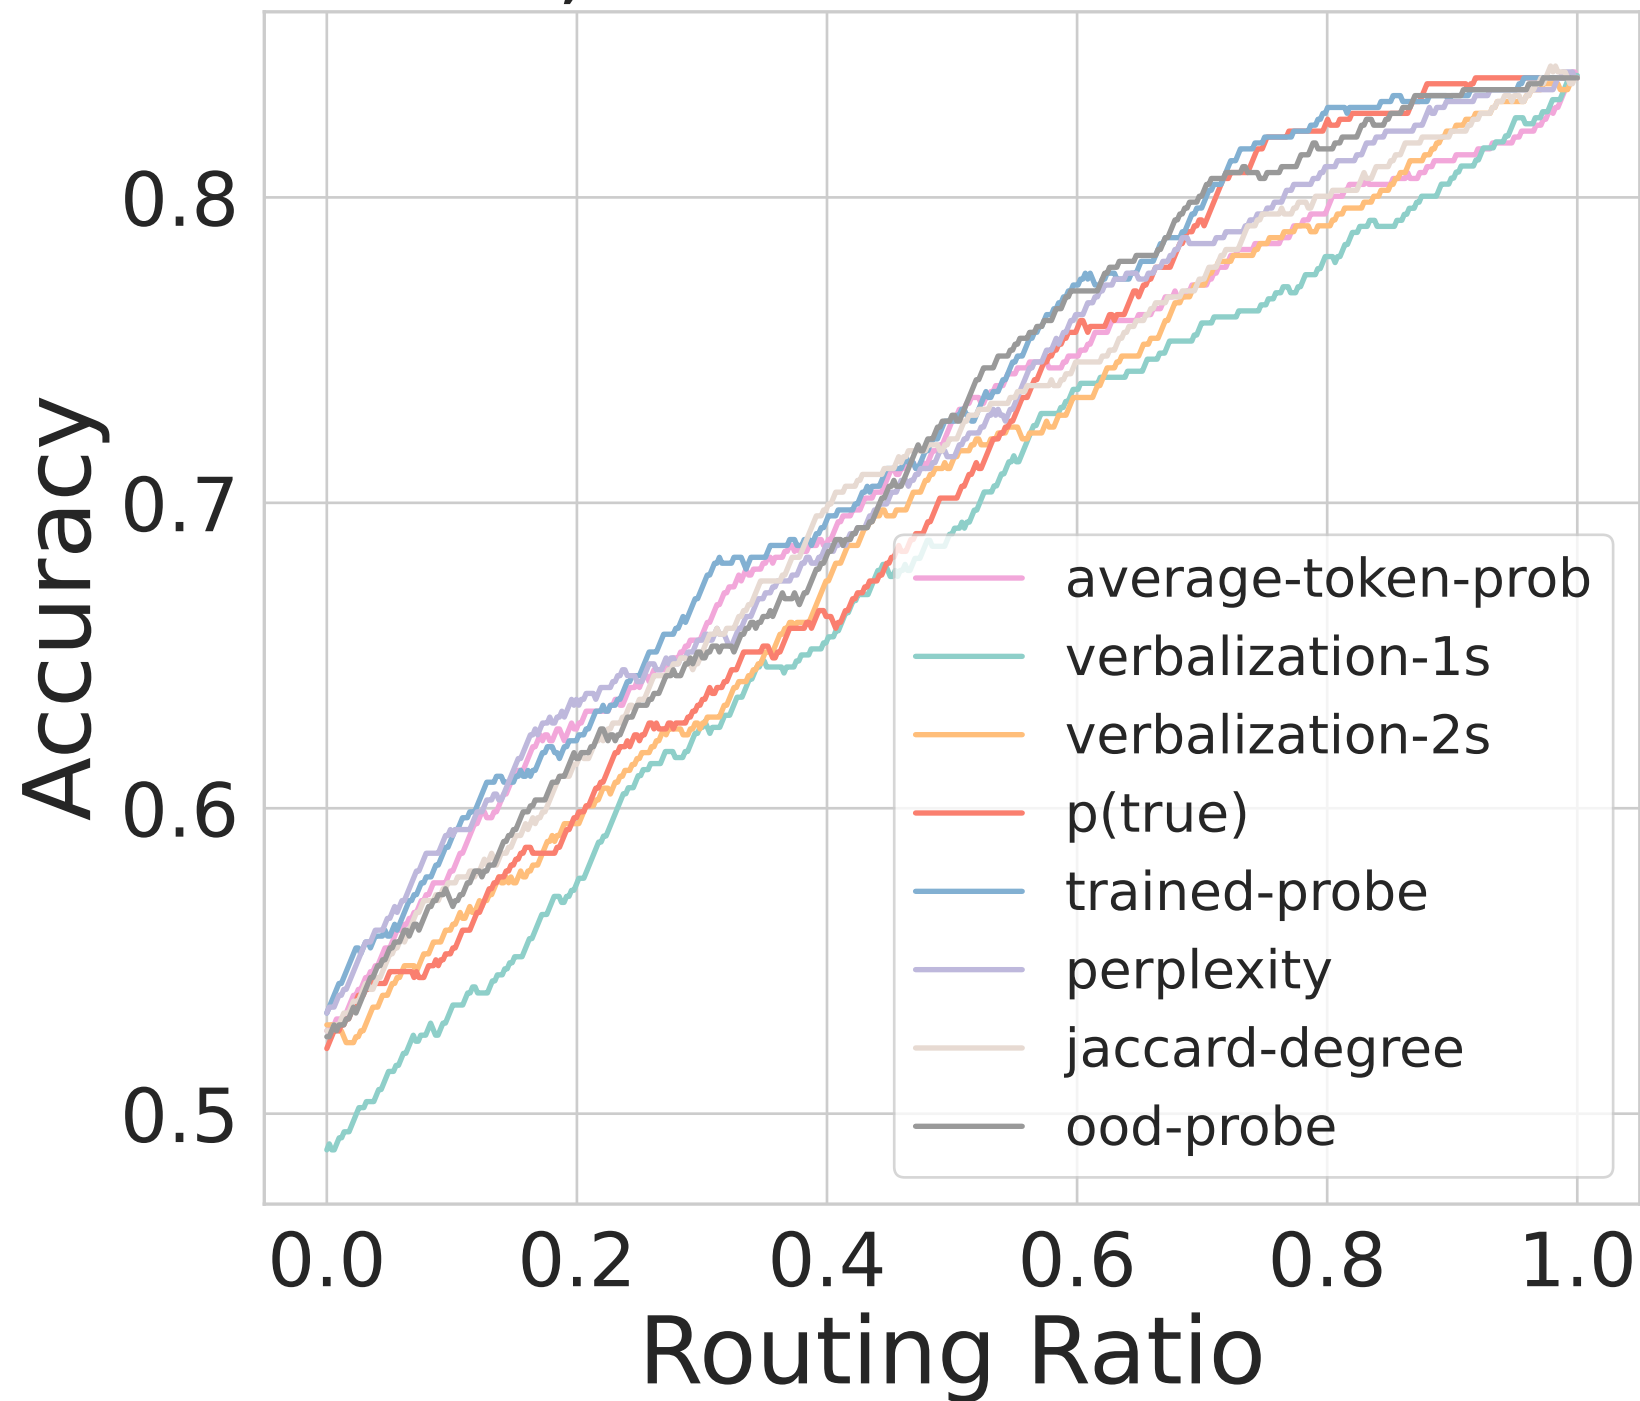

Supplement: supplementary_material [file rr_acc_mmlu_llama-3.2-3b_gpt41.pdf › Routing_SLM_LLMs/Uncertainty-based Routing/w_legend/to_gpt41/rr_acc_mmlu_llama-3.2-3b_gpt41.pdf]

**MMLU, mistral-7b to GPT-4.1 mini**

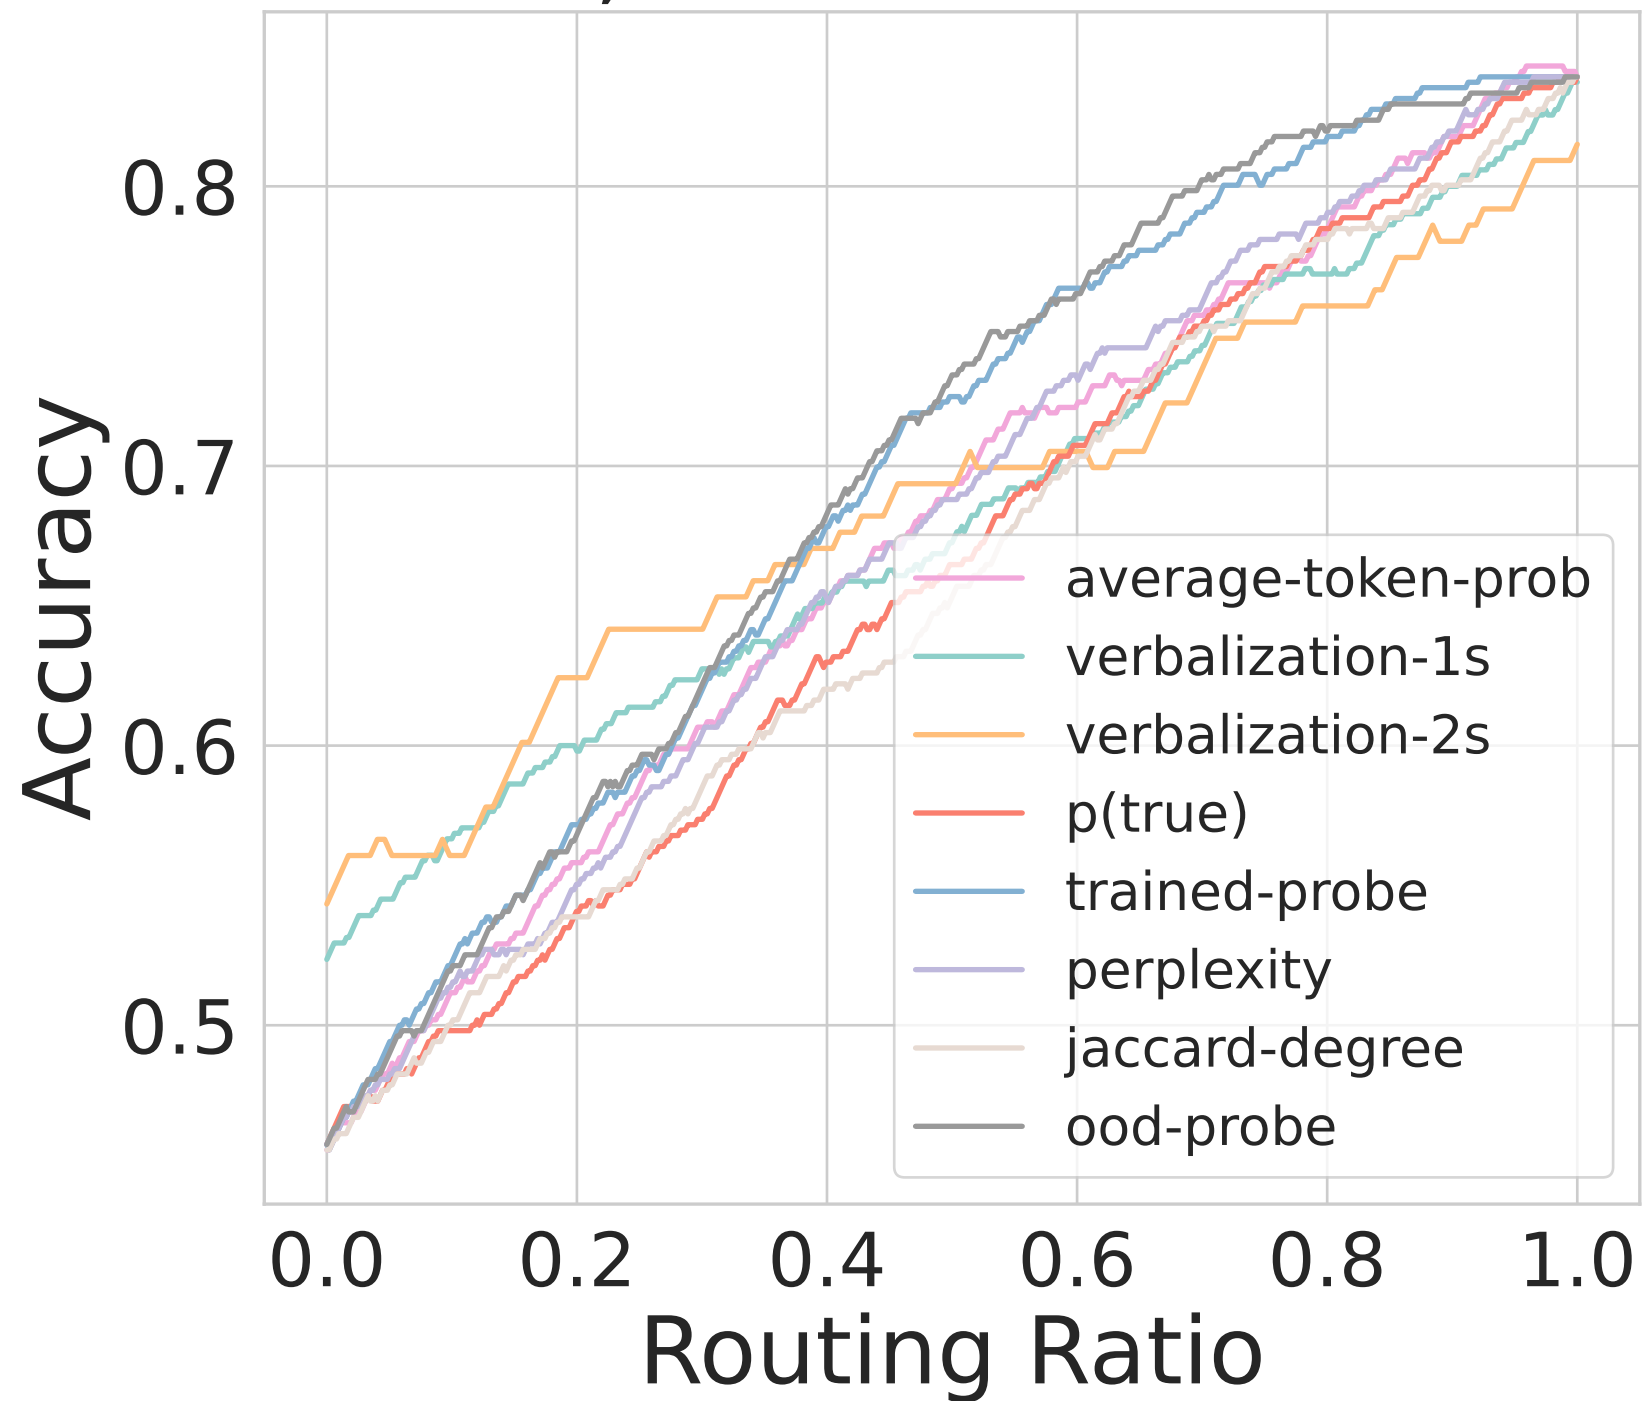

Supplement: supplementary_material [file rr_acc_mmlu_mistral-7b_gpt41.pdf › Routing_SLM_LLMs/Uncertainty-based Routing/w_legend/to_gpt41/rr_acc_mmlu_mistral-7b_gpt41.pdf]

**MMLU, phi-3.5-mini to GPT-4.1 mini**

Accuracy

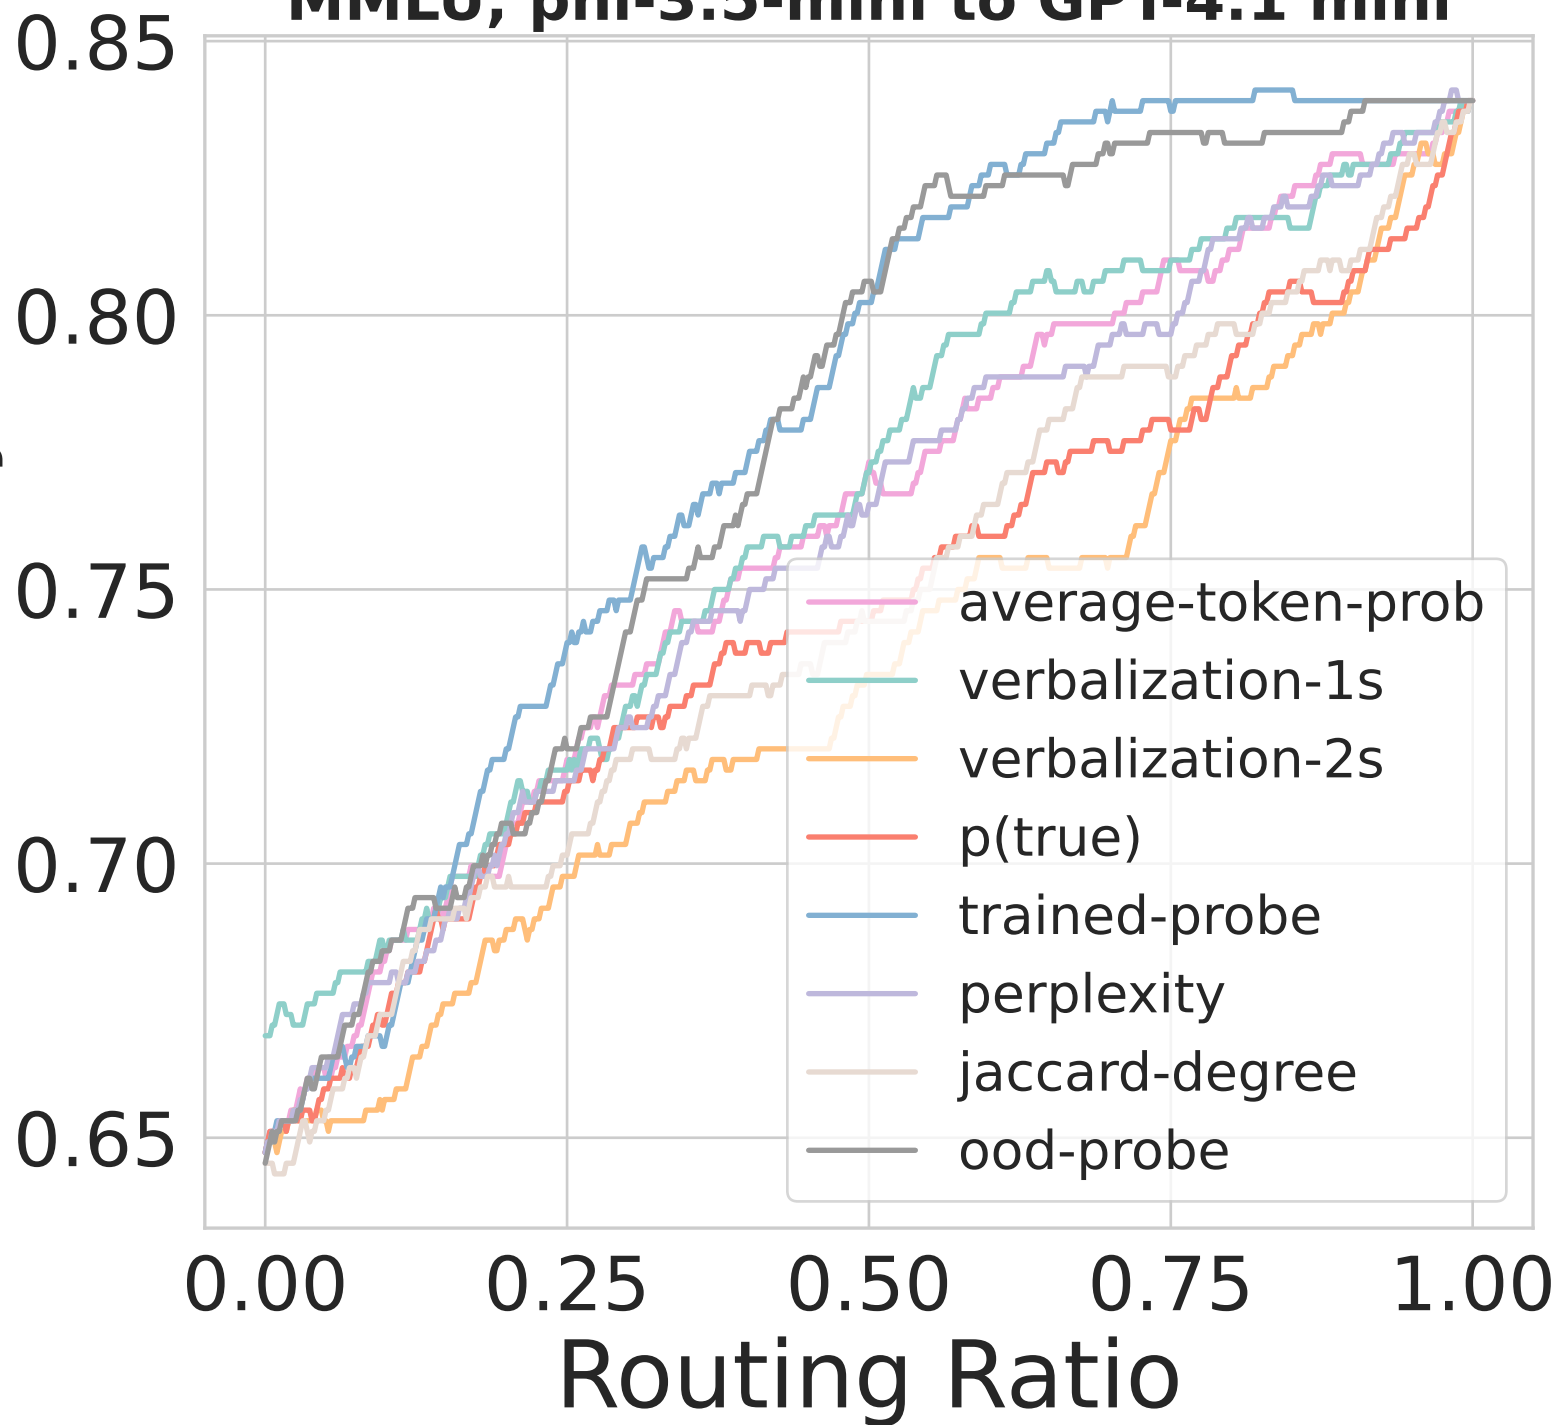

Supplement: supplementary_material [file rr_acc_mmlu_phi-3.5-mini_gpt41.pdf › Routing_SLM_LLMs/Uncertainty-based Routing/w_legend/to_gpt41/rr_acc_mmlu_phi-3.5-mini_gpt41.pdf]

## MMLU, qwen-2.5-7b to GPT-4.1 mini

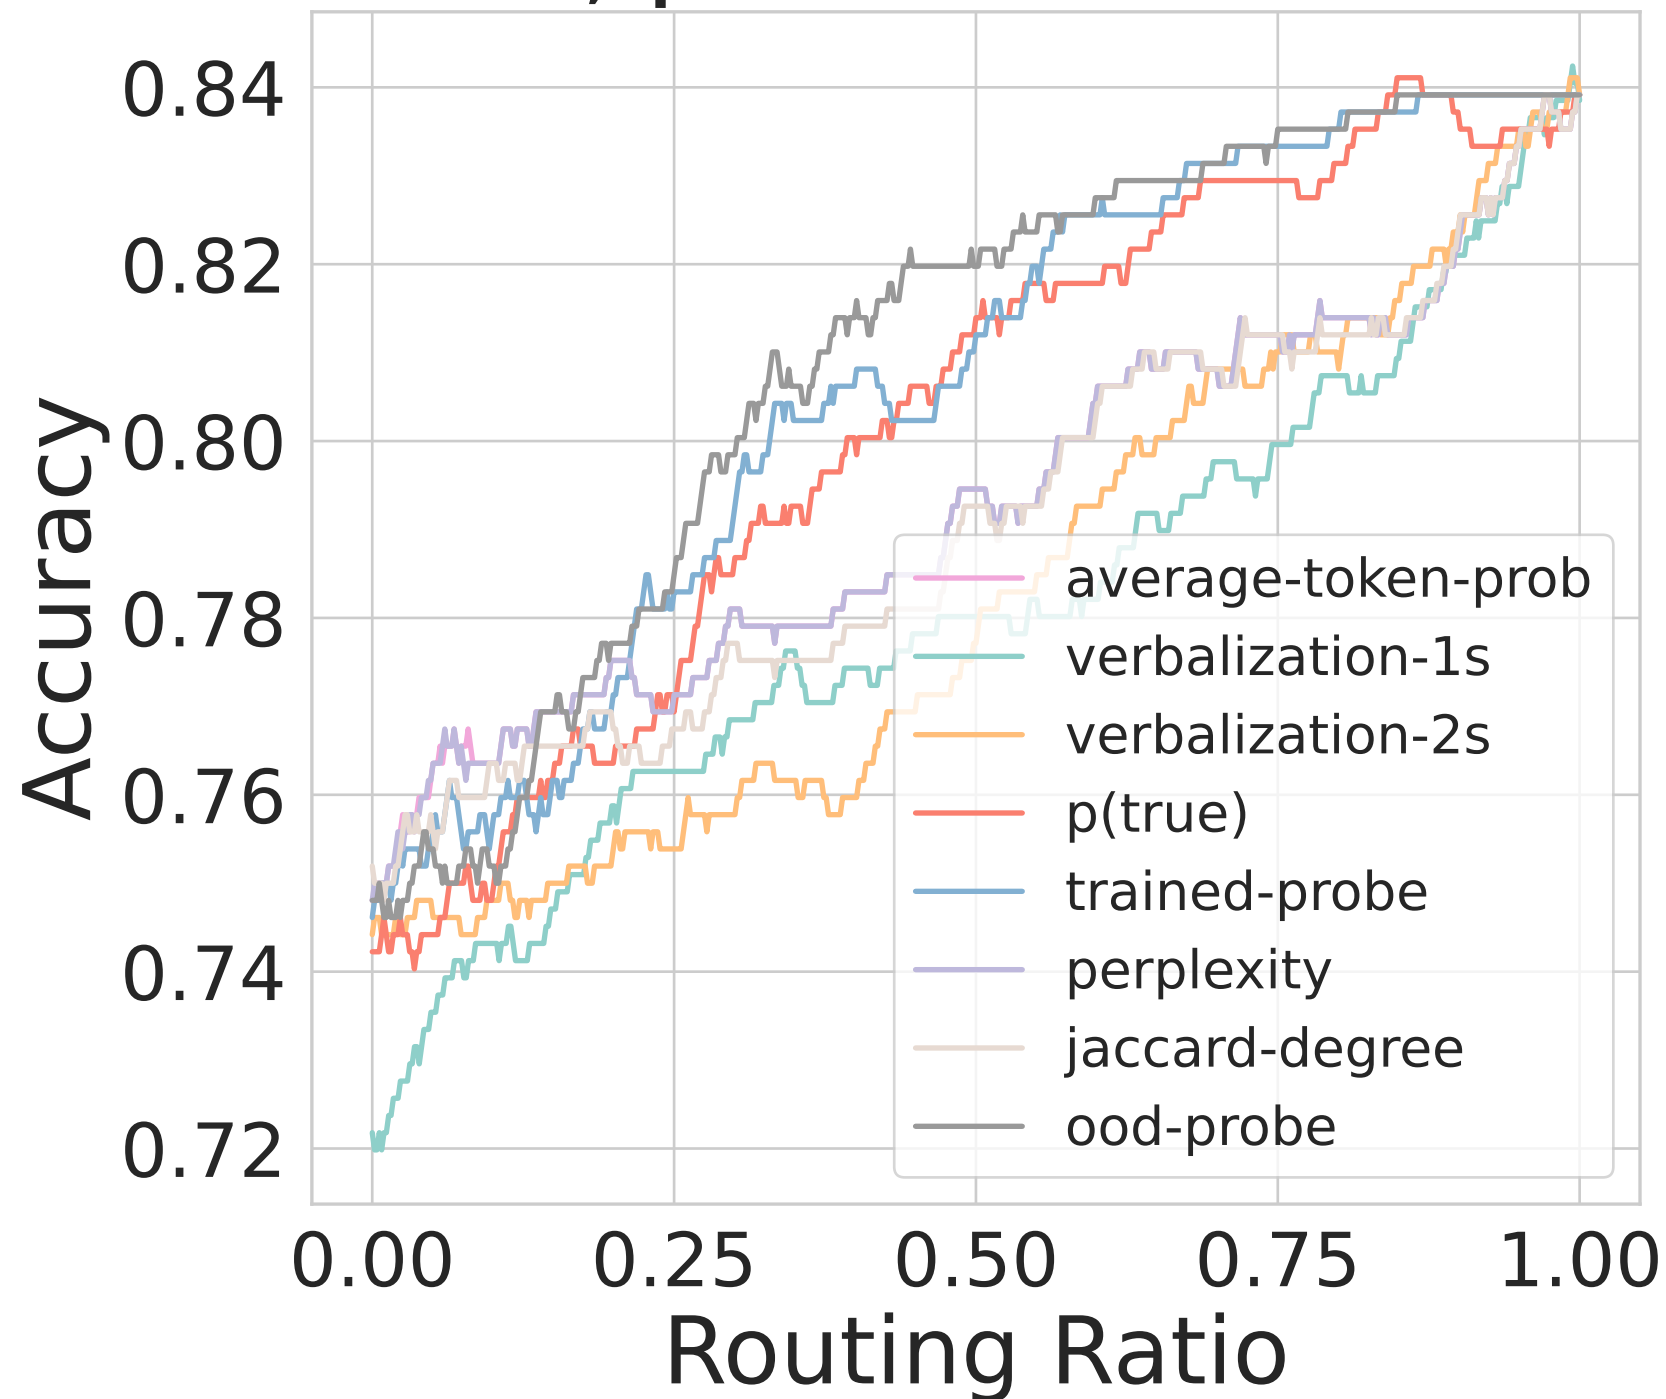

Supplement: supplementary_material [file rr_acc_mmlu_qwen-2.5-7b_gpt41.pdf › Routing_SLM_LLMs/Uncertainty-based Routing/w_legend/to_gpt41/rr_acc_mmlu_qwen-2.5-7b_gpt41.pdf]

## MMLU, rwkv to GPT-4.1 mini

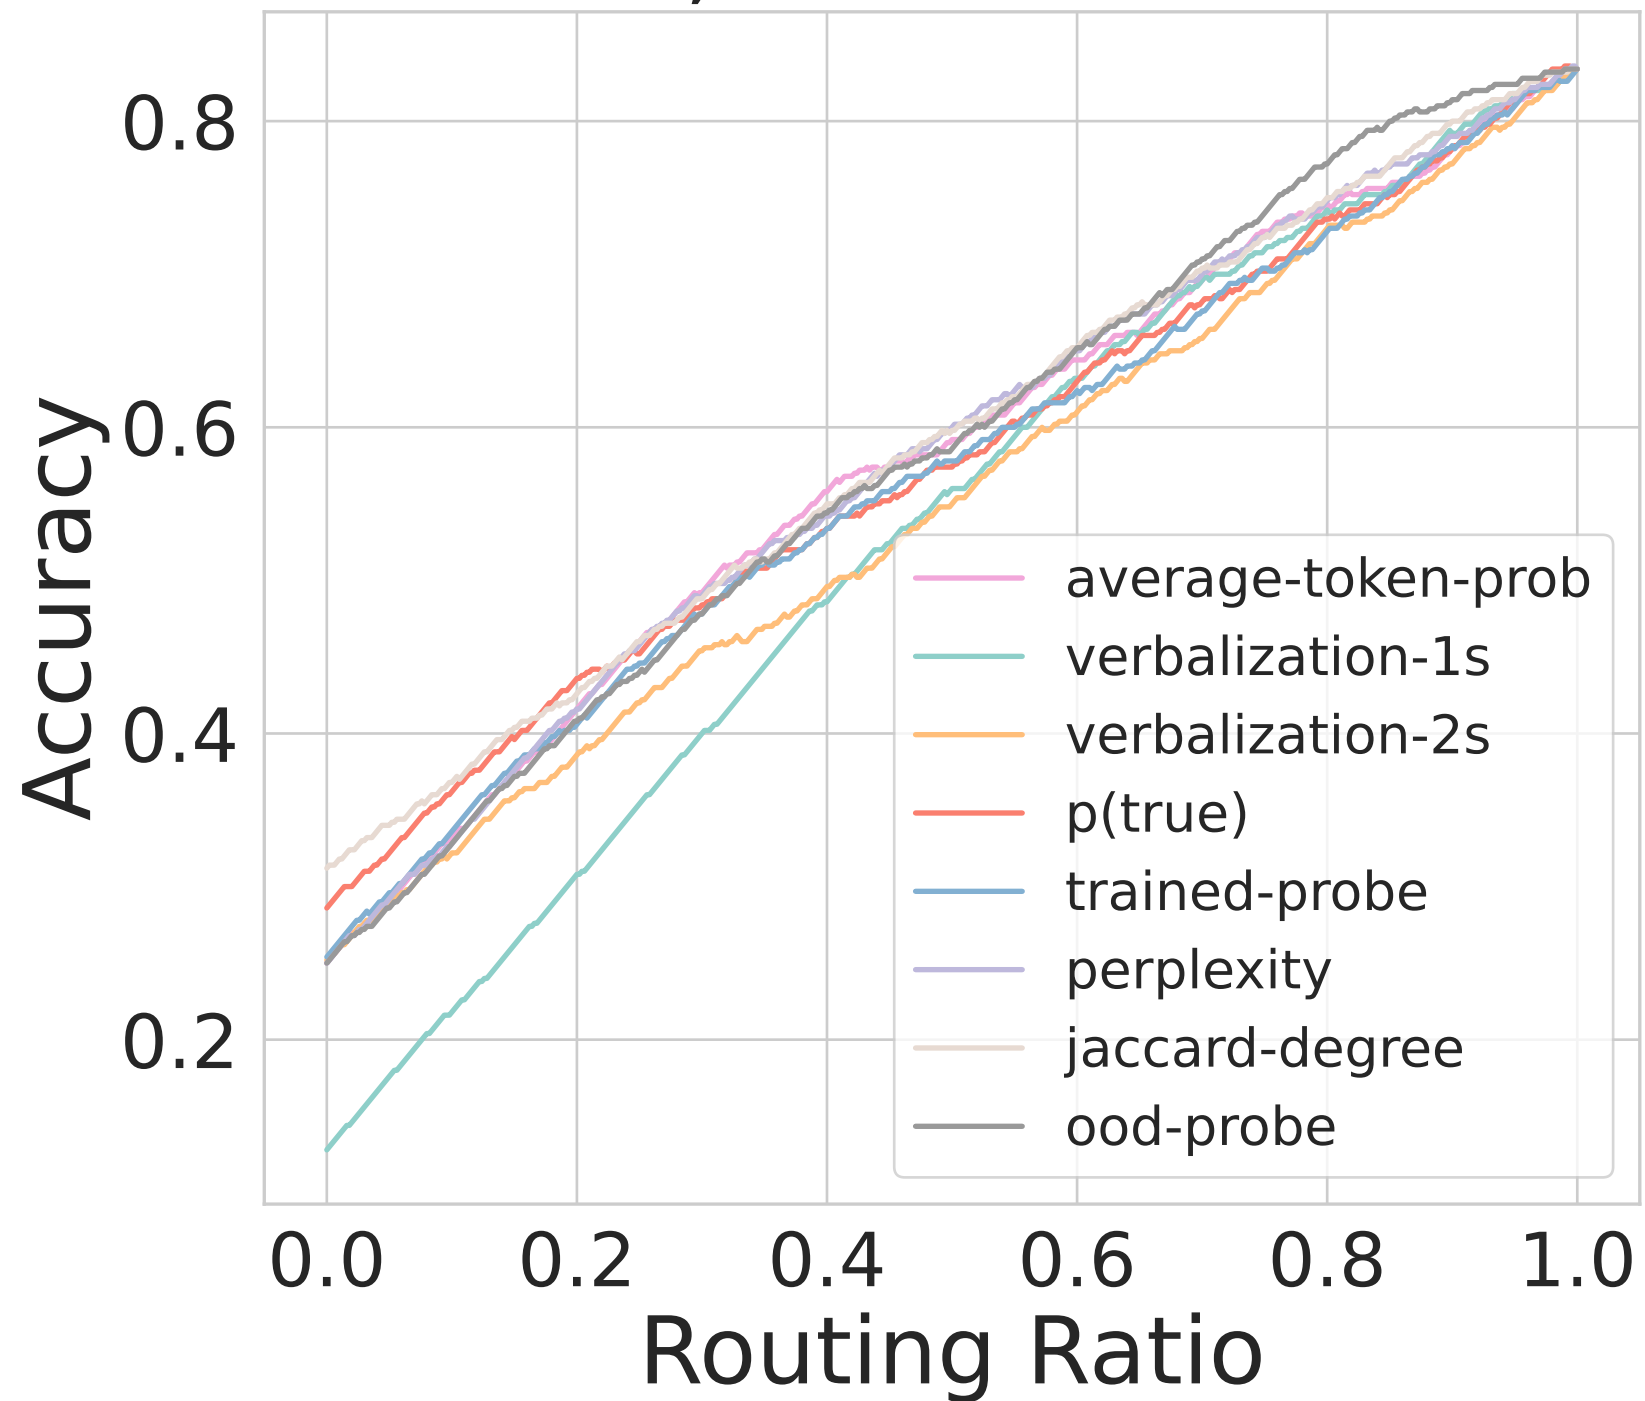

Supplement: supplementary_material [file rr_acc_mmlu_rwkv_gpt41.pdf › Routing_SLM_LLMs/Uncertainty-based Routing/w_legend/to_gpt41/rr_acc_mmlu_rwkv_gpt41.pdf]

**MultiArith, Qwen3-0.6B to GPT-4.1 mini**

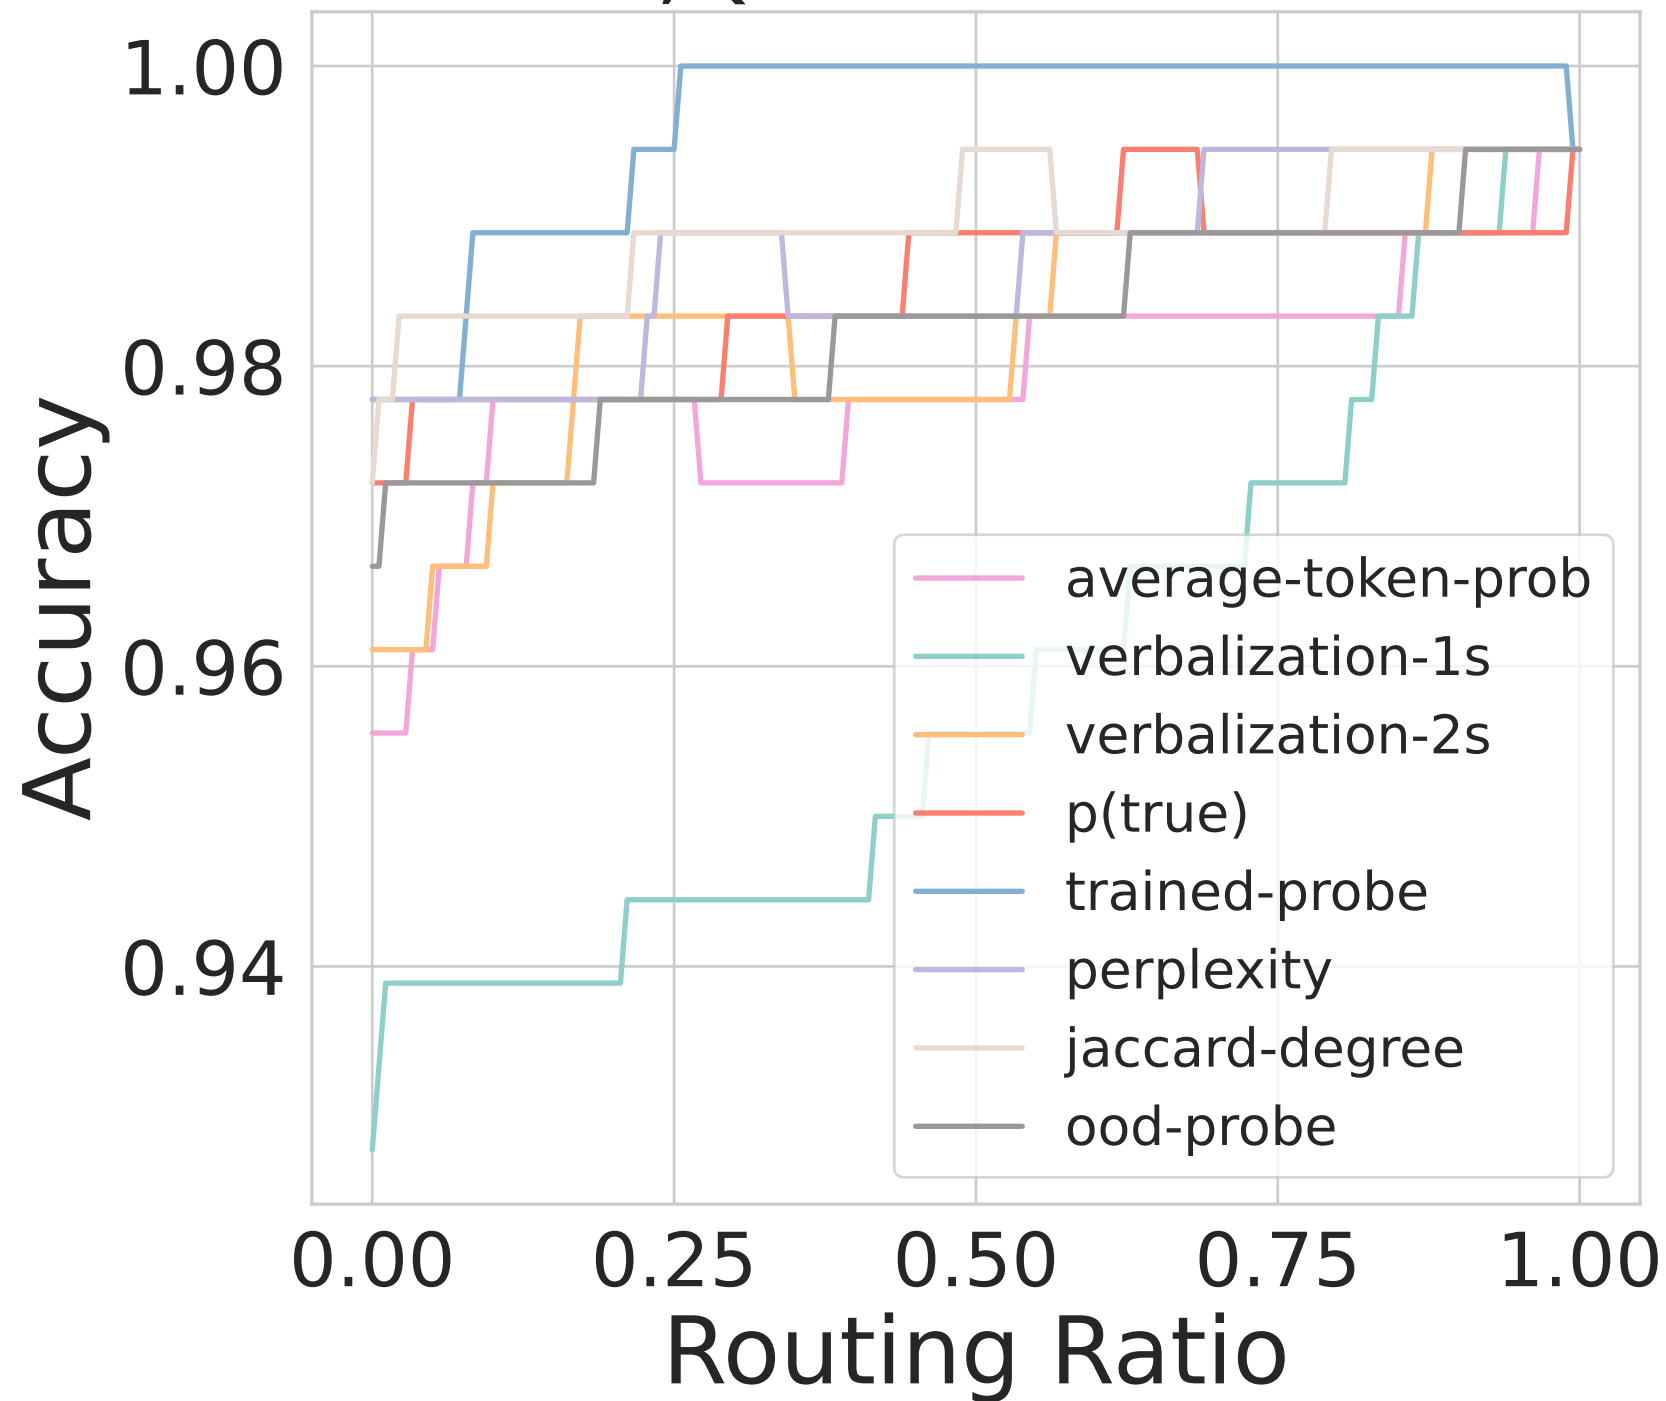

Supplement: supplementary_material [file rr_acc_multiarith_Qwen3-0.6B_gpt41.pdf › Routing_SLM_LLMs/Uncertainty-based Routing/w_legend/to_gpt41/rr_acc_multiarith_Qwen3-0.6B_gpt41.pdf]

**MultiArith, Qwen3-1.7B to GPT-4.1 mini**

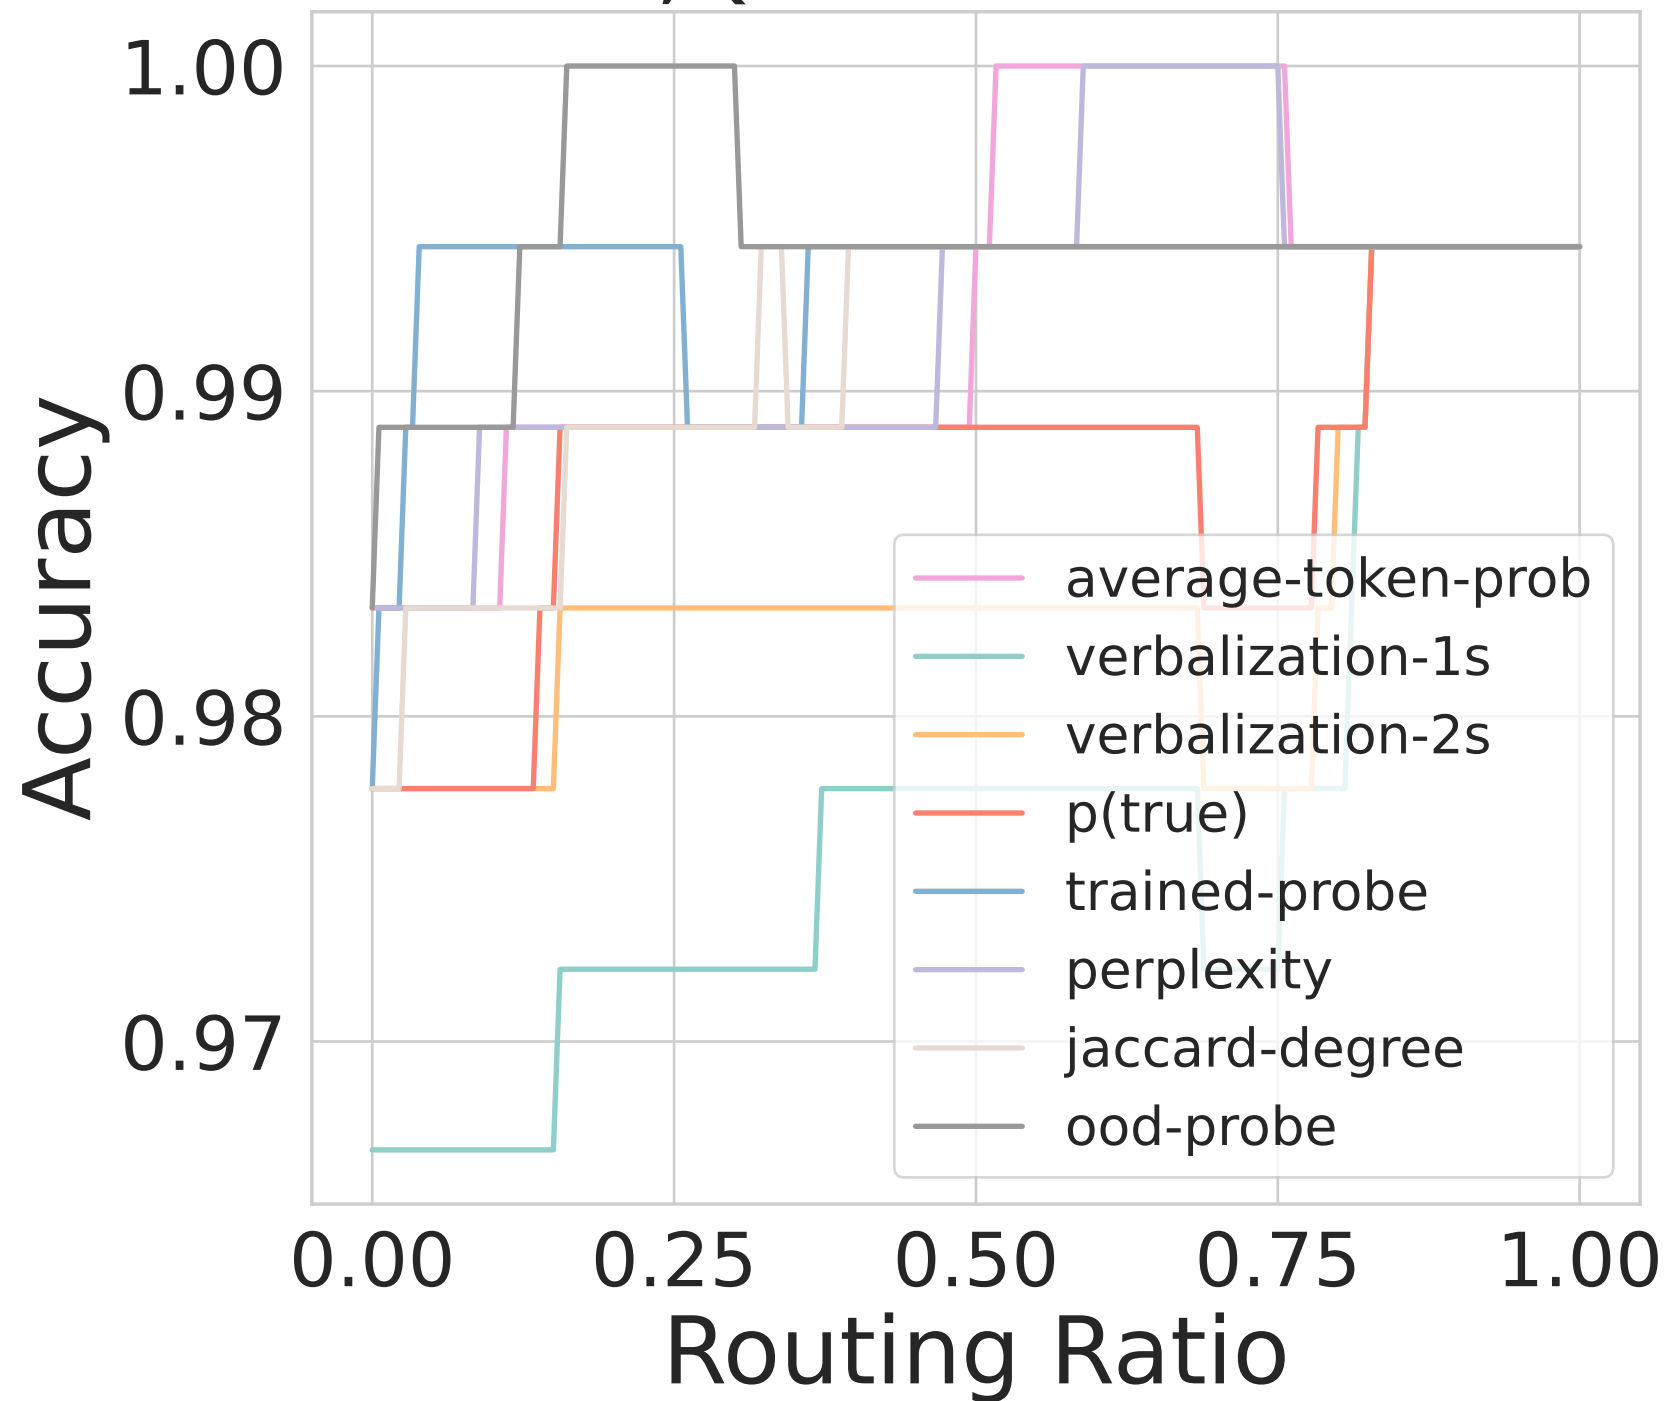

Supplement: supplementary_material [file rr_acc_multiarith_Qwen3-1.7B_gpt41.pdf › Routing_SLM_LLMs/Uncertainty-based Routing/w_legend/to_gpt41/rr_acc_multiarith_Qwen3-1.7B_gpt41.pdf]

**MultiArith, Qwen3-4B to GPT-4.1 mini**

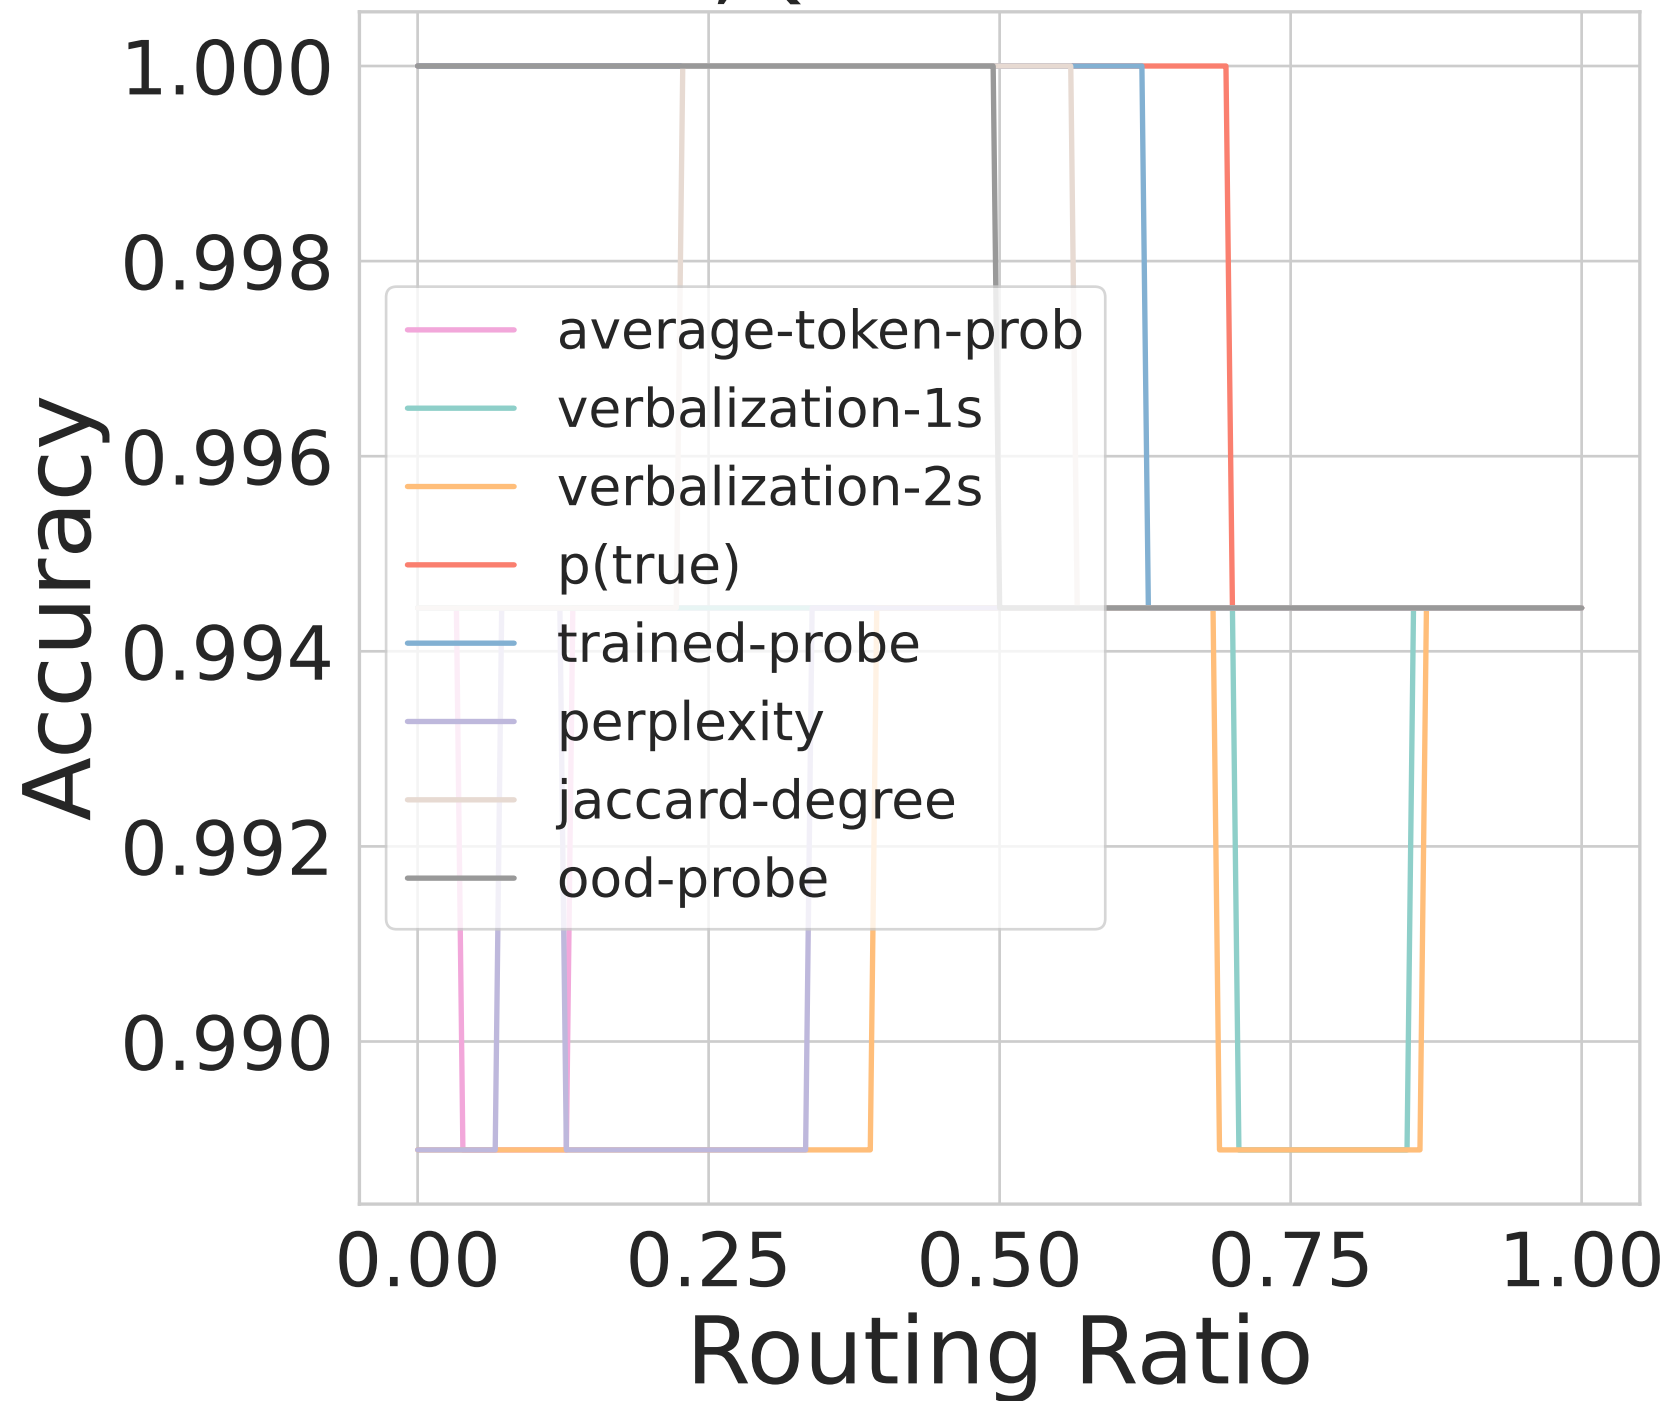

Supplement: supplementary_material [file rr_acc_multiarith_Qwen3-4B_gpt41.pdf › Routing_SLM_LLMs/Uncertainty-based Routing/w_legend/to_gpt41/rr_acc_multiarith_Qwen3-4B_gpt41.pdf]

[illegible]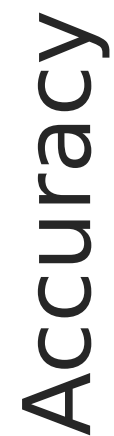

Supplement: supplementary_material [file rr_acc_multiarith_granite-3.1-8b_gpt41.pdf › Routing_SLM_LLMs/Uncertainty-based Routing/w_legend/to_gpt41/rr_acc_multiarith_granite-3.1-8b_gpt41.pdf]

## MultiArith, llama-3.2-1b to GPT-4.1 mini

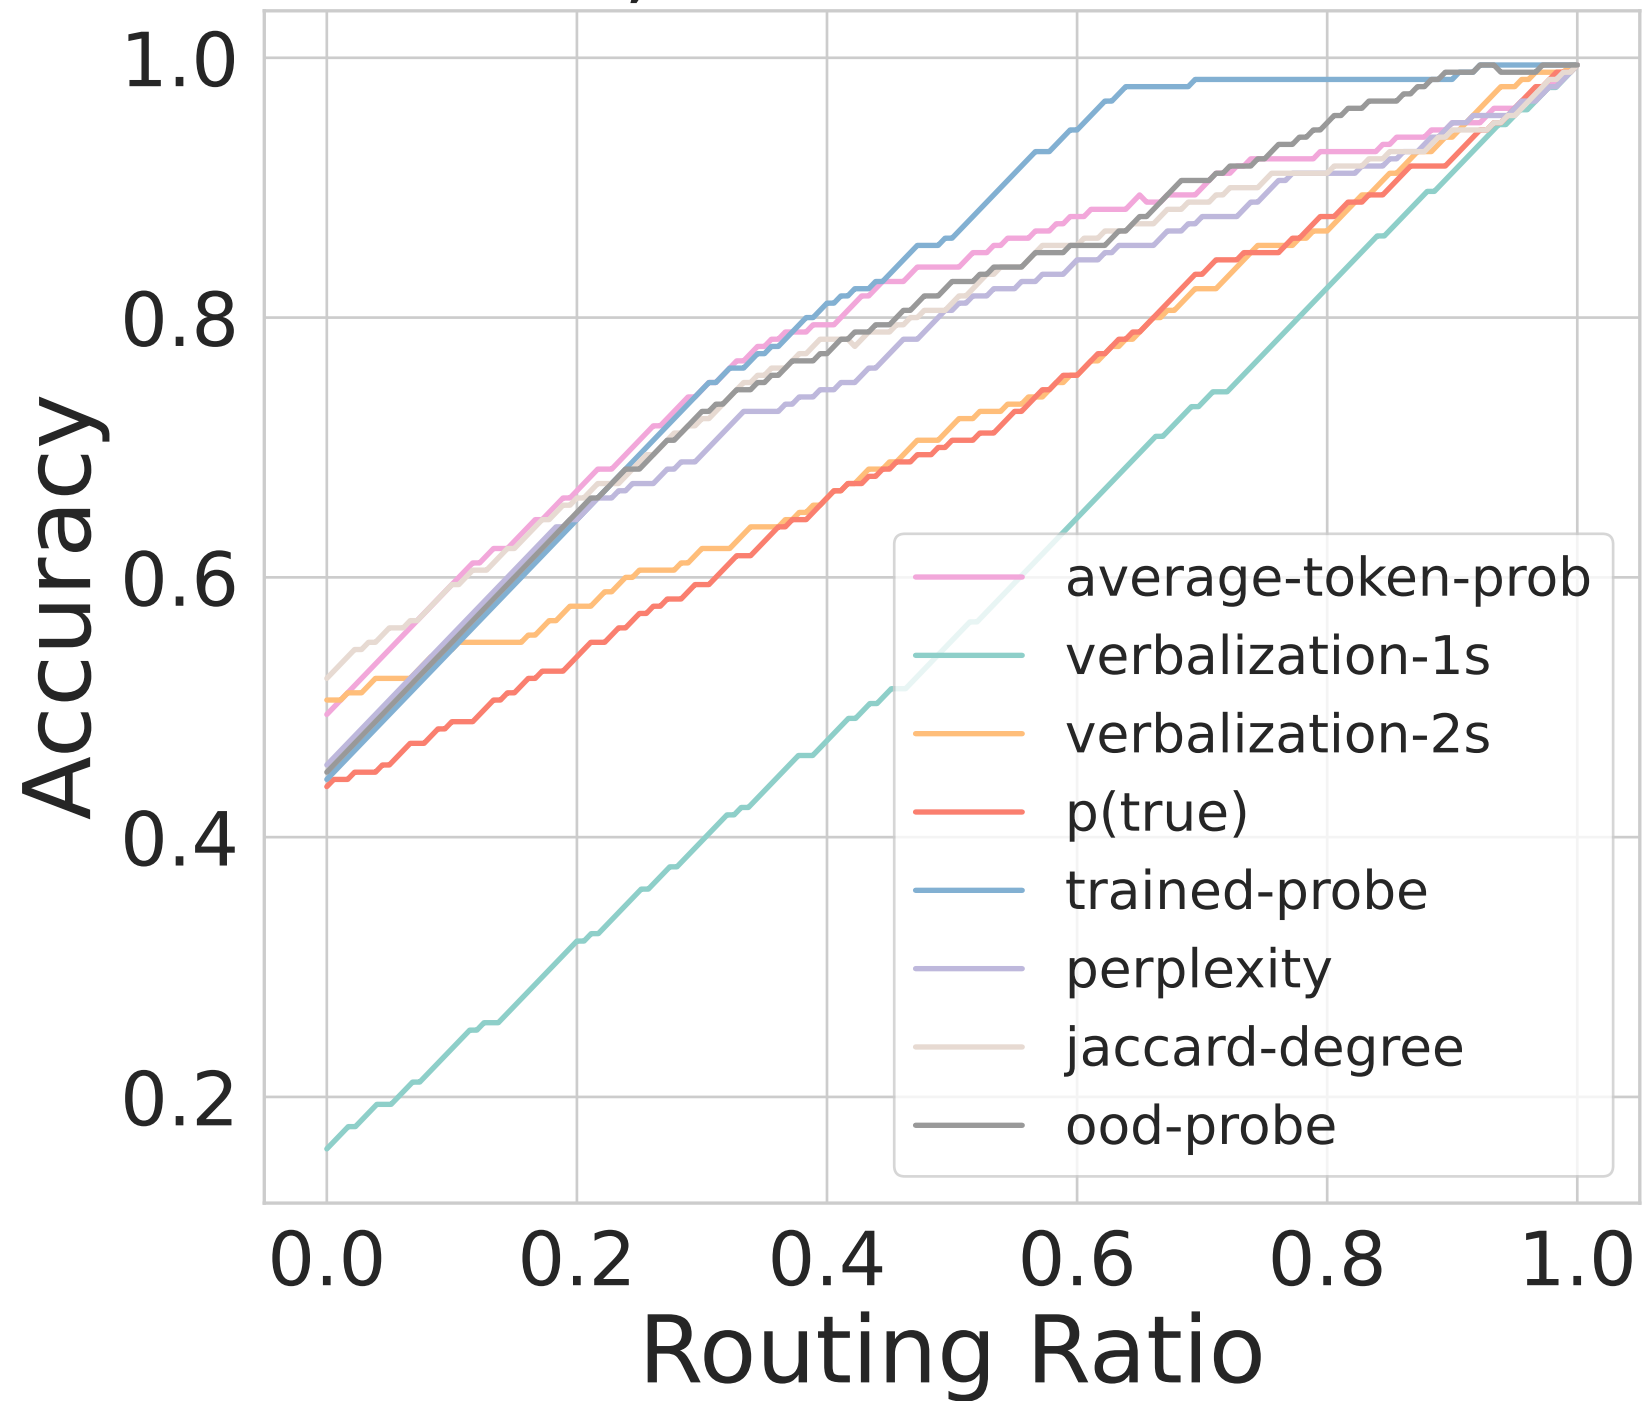

Supplement: supplementary_material [file rr_acc_multiarith_llama-3.2-1b_gpt41.pdf › Routing_SLM_LLMs/Uncertainty-based Routing/w_legend/to_gpt41/rr_acc_multiarith_llama-3.2-1b_gpt41.pdf]

## MultiArith, llama-3.2-3b to GPT-4.1 mini

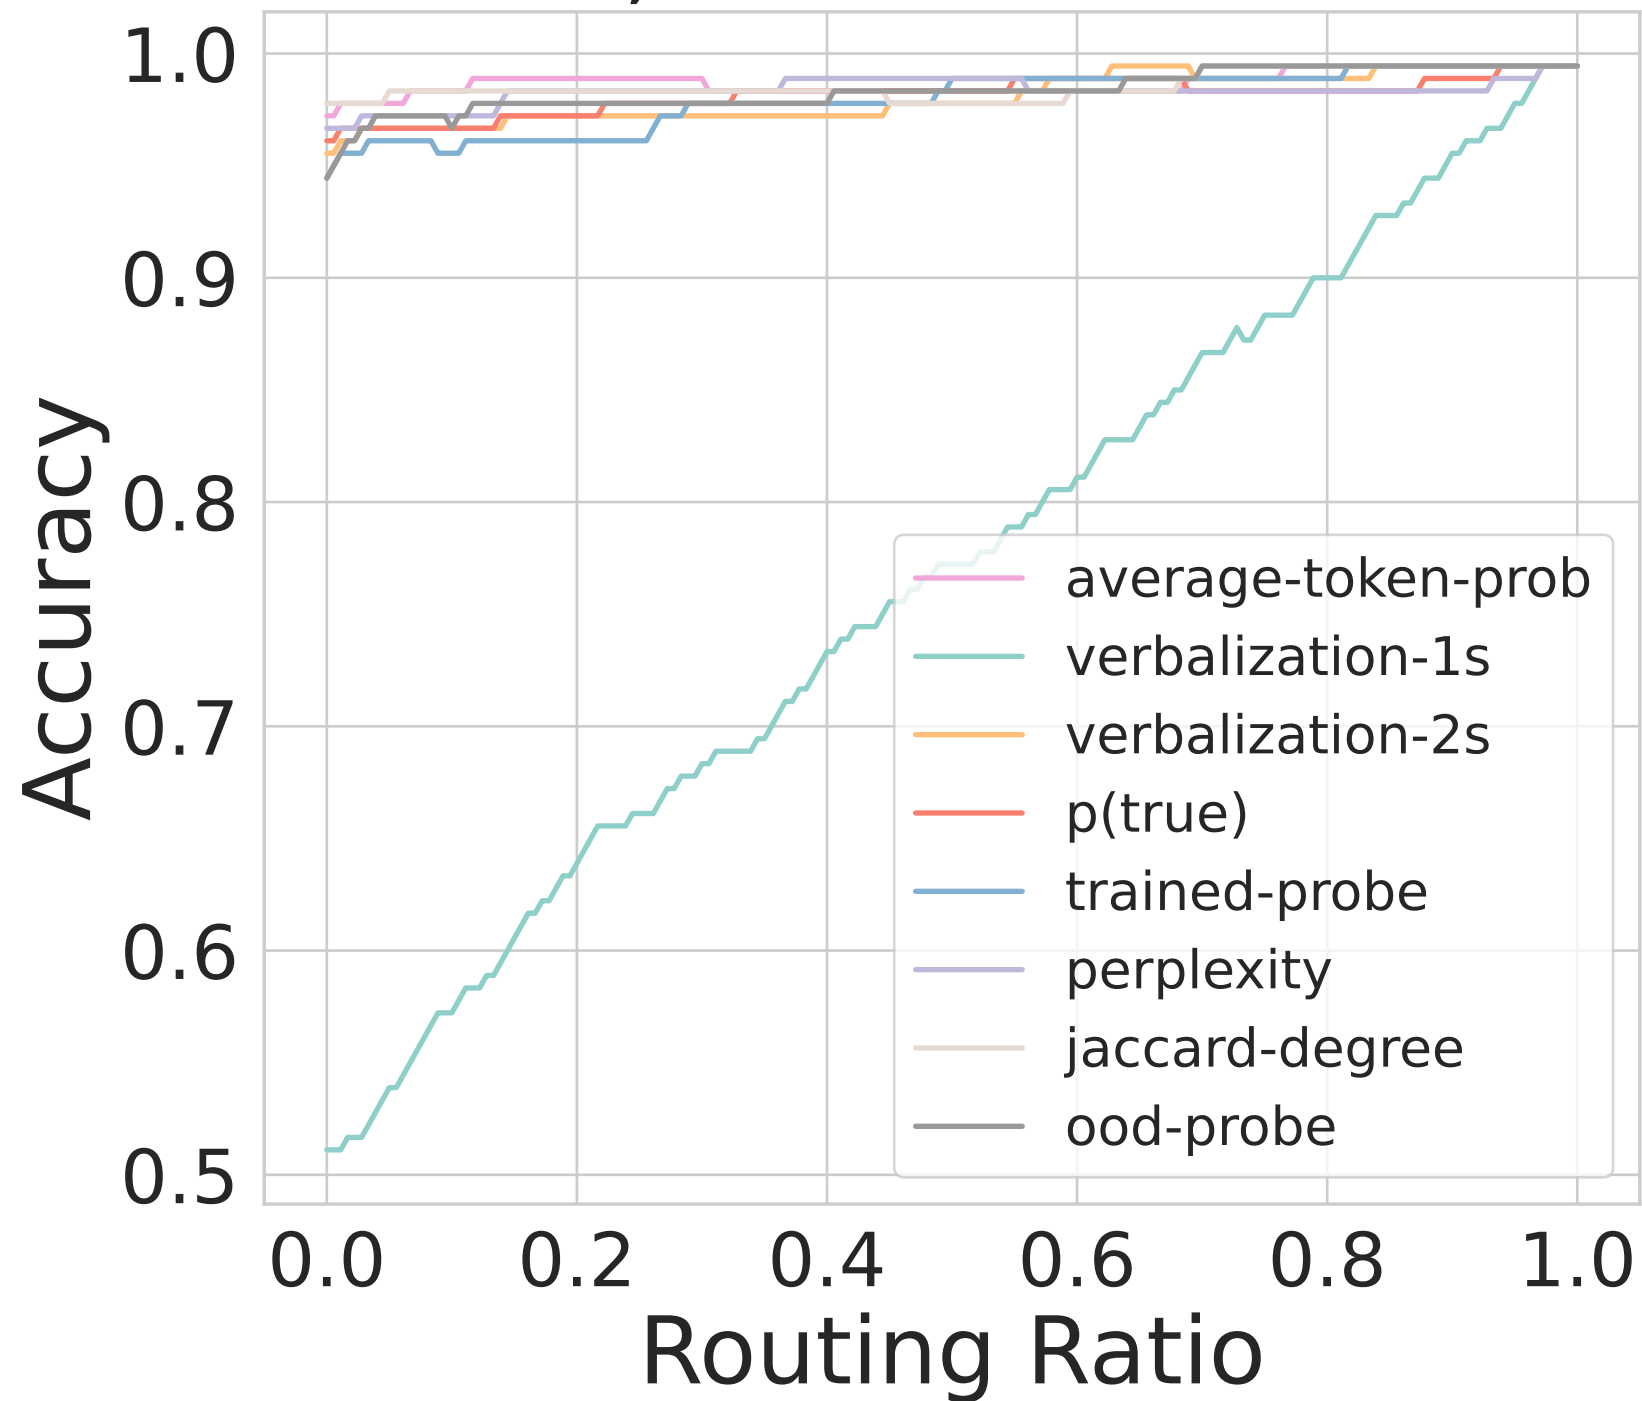

Supplement: supplementary_material [file rr_acc_multiarith_llama-3.2-3b_gpt41.pdf › Routing_SLM_LLMs/Uncertainty-based Routing/w_legend/to_gpt41/rr_acc_multiarith_llama-3.2-3b_gpt41.pdf]

## MultiArith, mistral-7b to GPT-4.1 mini

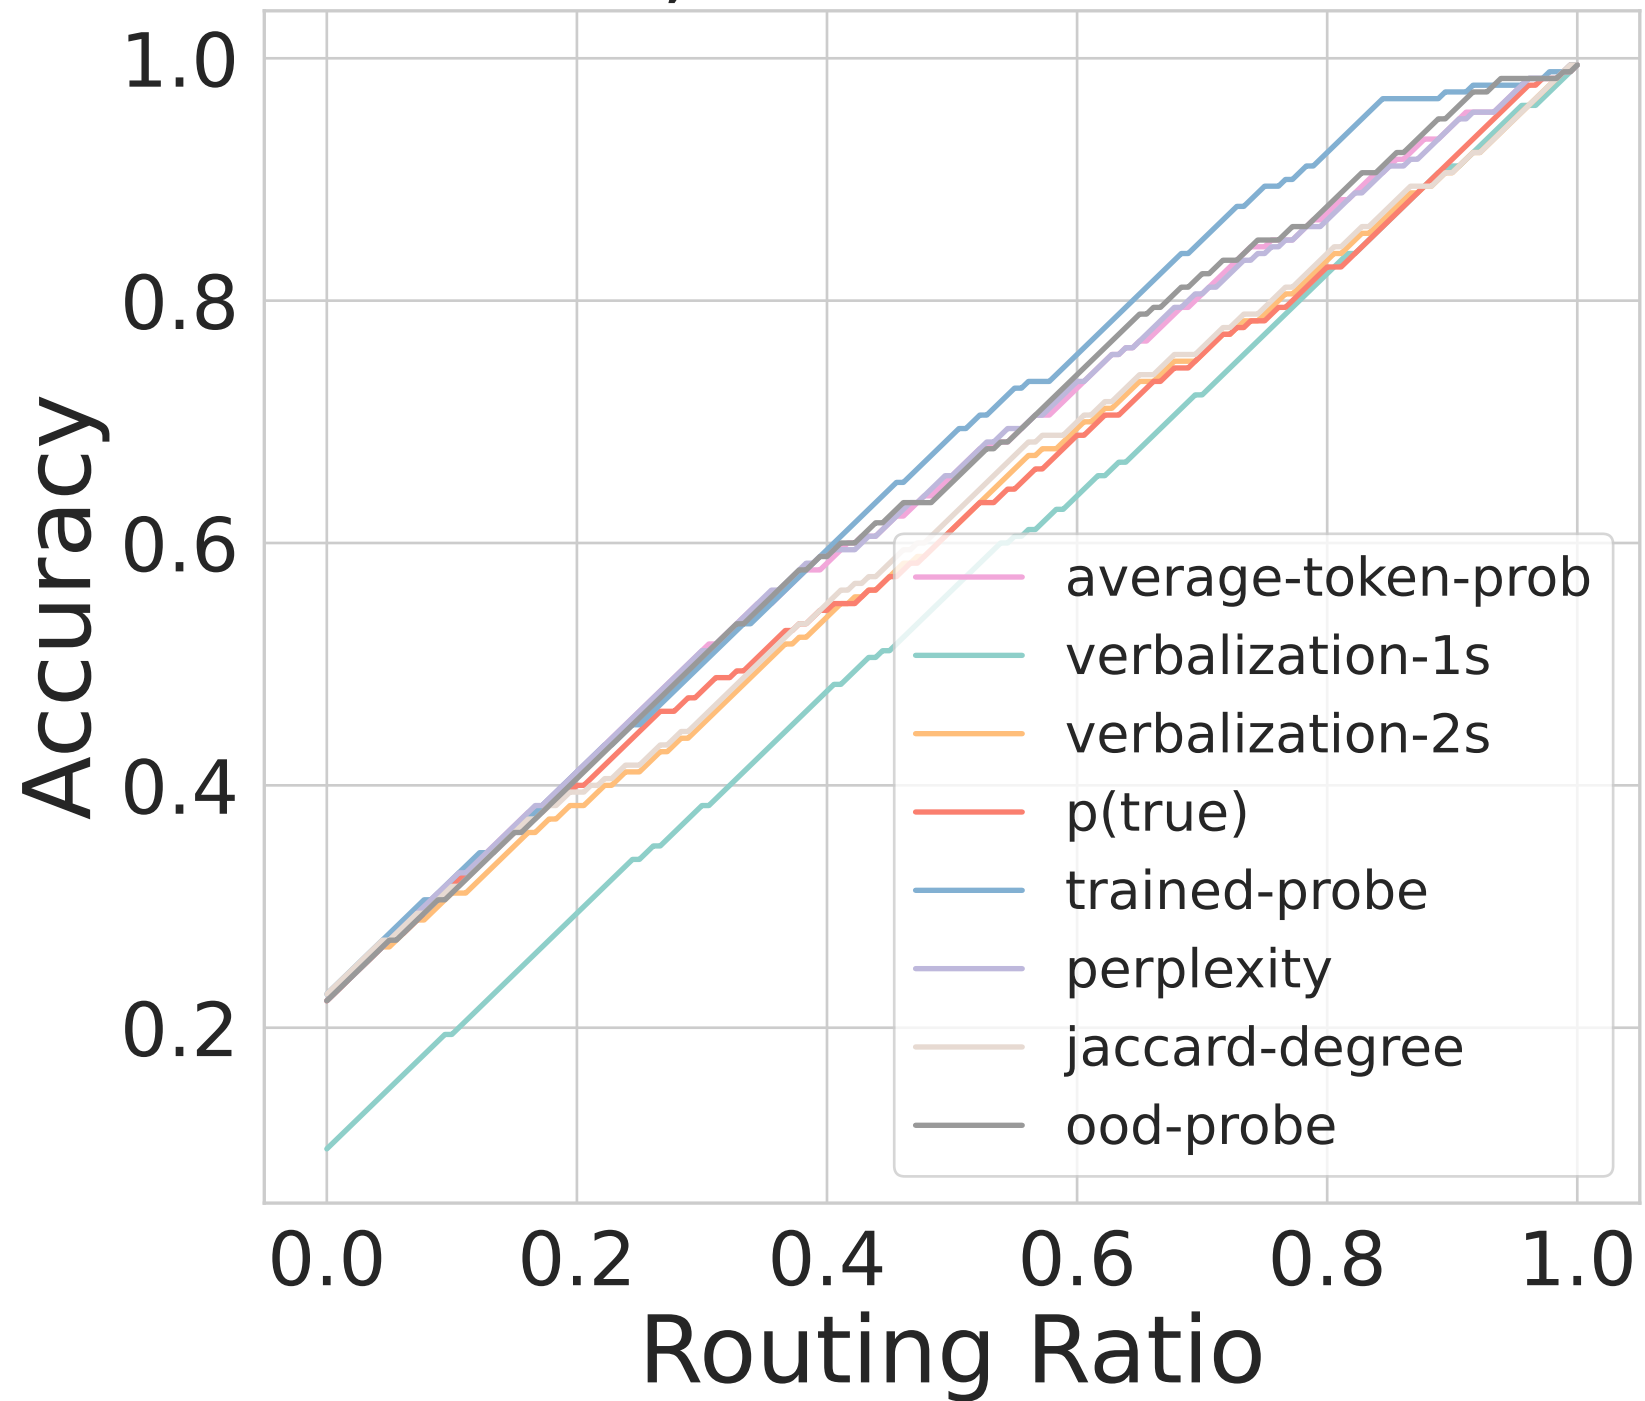

Supplement: supplementary_material [file rr_acc_multiarith_mistral-7b_gpt41.pdf › Routing_SLM_LLMs/Uncertainty-based Routing/w_legend/to_gpt41/rr_acc_multiarith_mistral-7b_gpt41.pdf]

# MultiArith, phi-4-mini-reasoning to GPT-4.1 mini

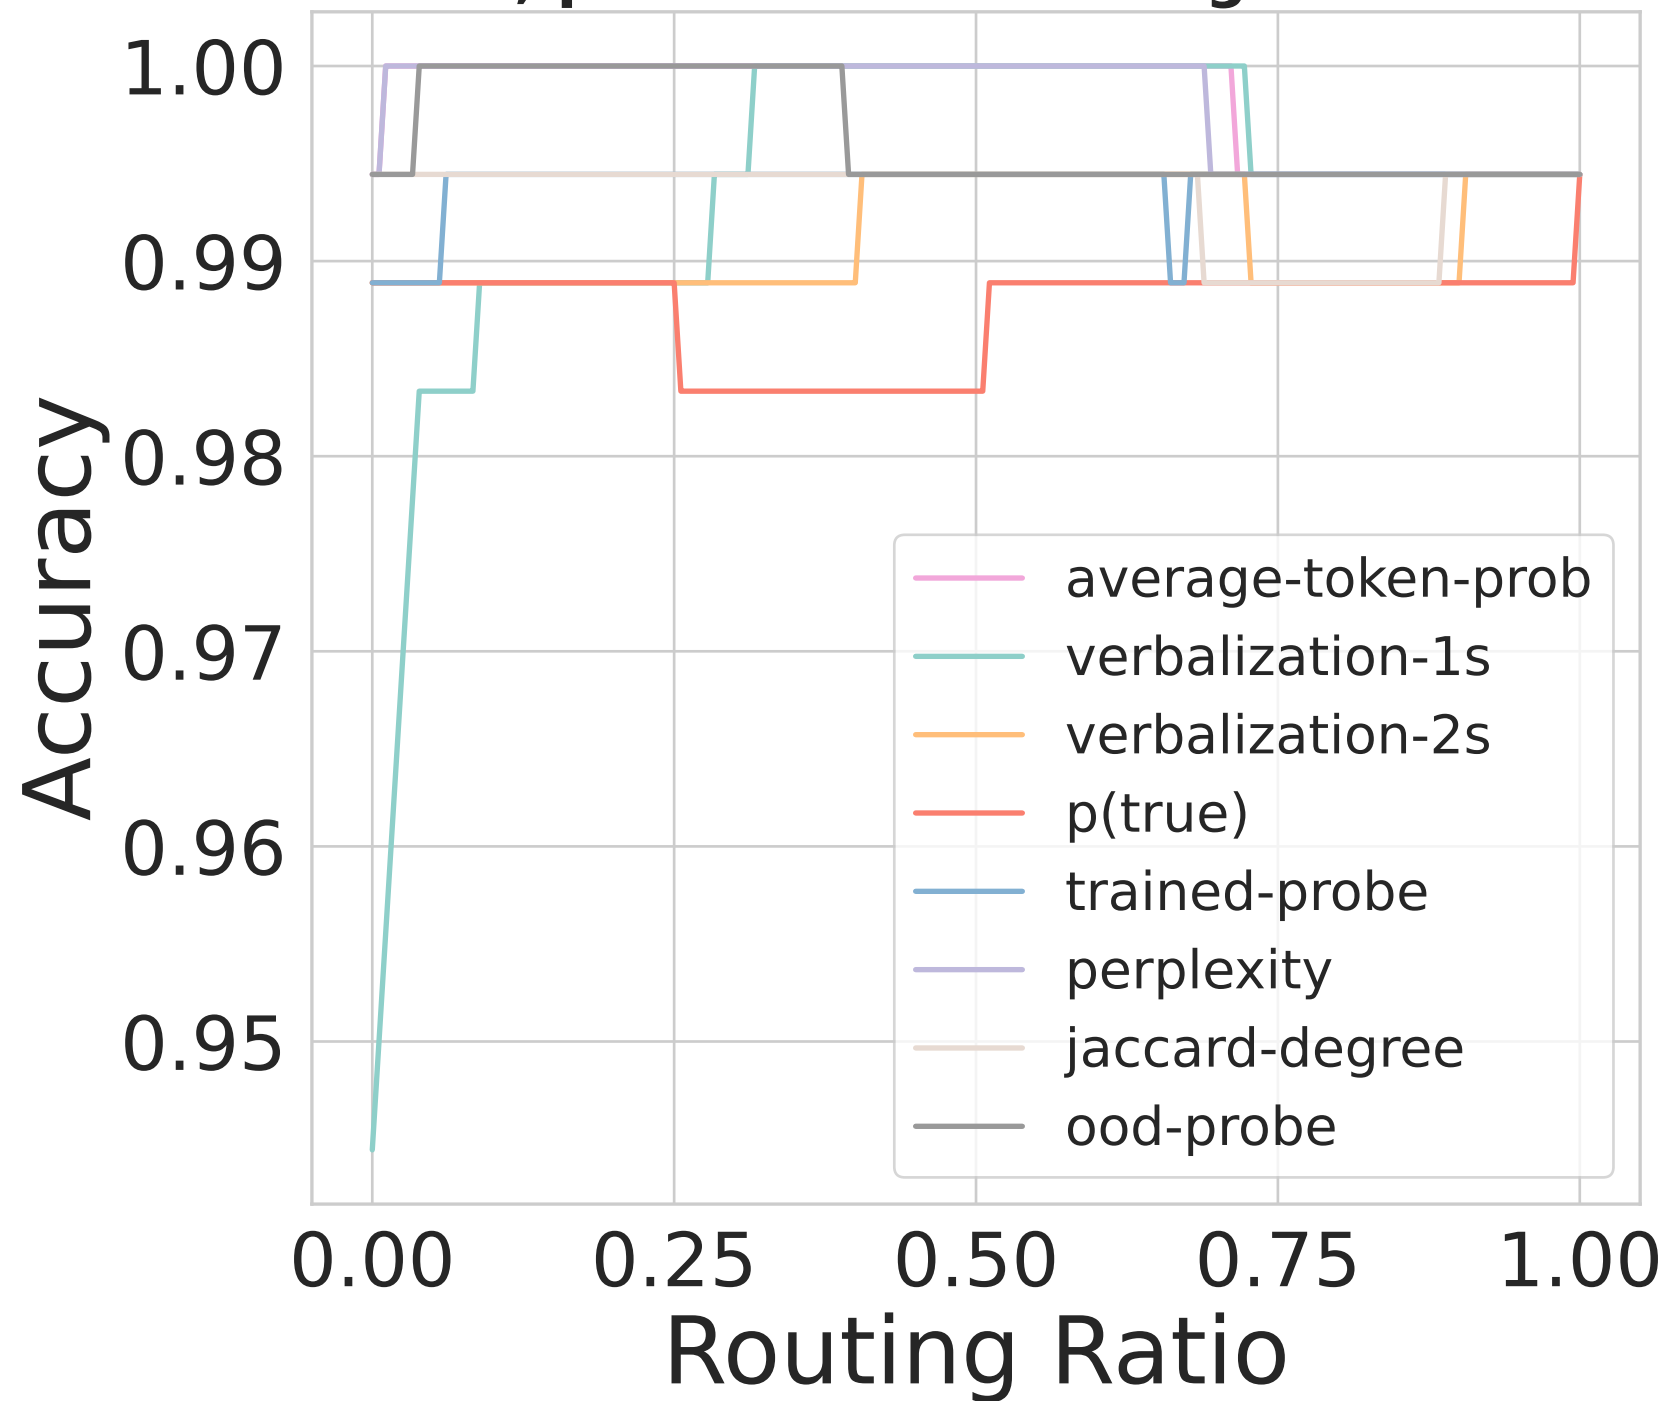

Supplement: supplementary_material [file rr_acc_multiarith_phi-4-mini-reasoning_gpt41.pdf › Routing_SLM_LLMs/Uncertainty-based Routing/w_legend/to_gpt41/rr_acc_multiarith_phi-4-mini-reasoning_gpt41.pdf]

## MultiArith, qwen-2.5-7b to GPT-4.1 mini

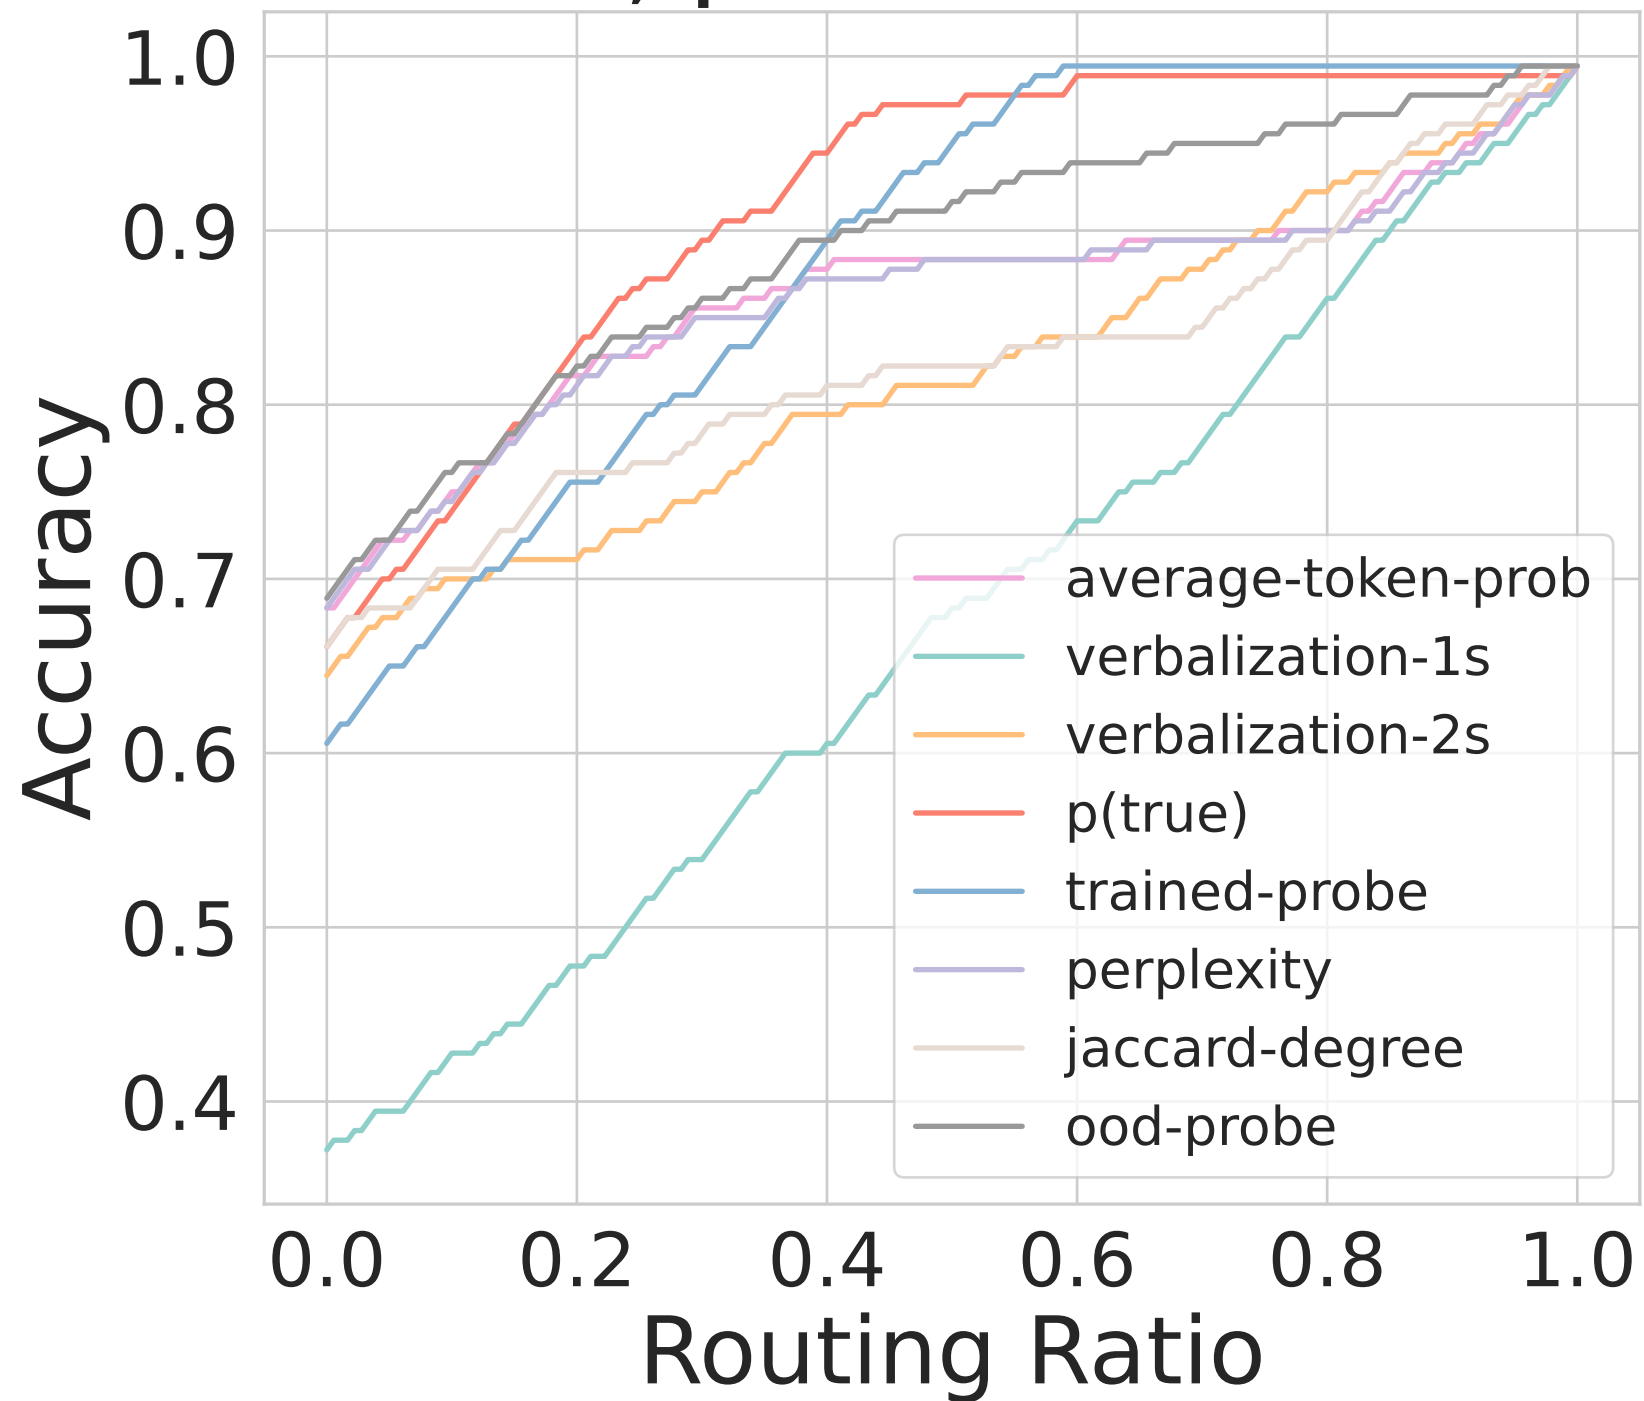

Supplement: supplementary_material [file rr_acc_multiarith_qwen-2.5-7b_gpt41.pdf › Routing_SLM_LLMs/Uncertainty-based Routing/w_legend/to_gpt41/rr_acc_multiarith_qwen-2.5-7b_gpt41.pdf]

# MultiArith, rwkv to GPT-4.1 mini

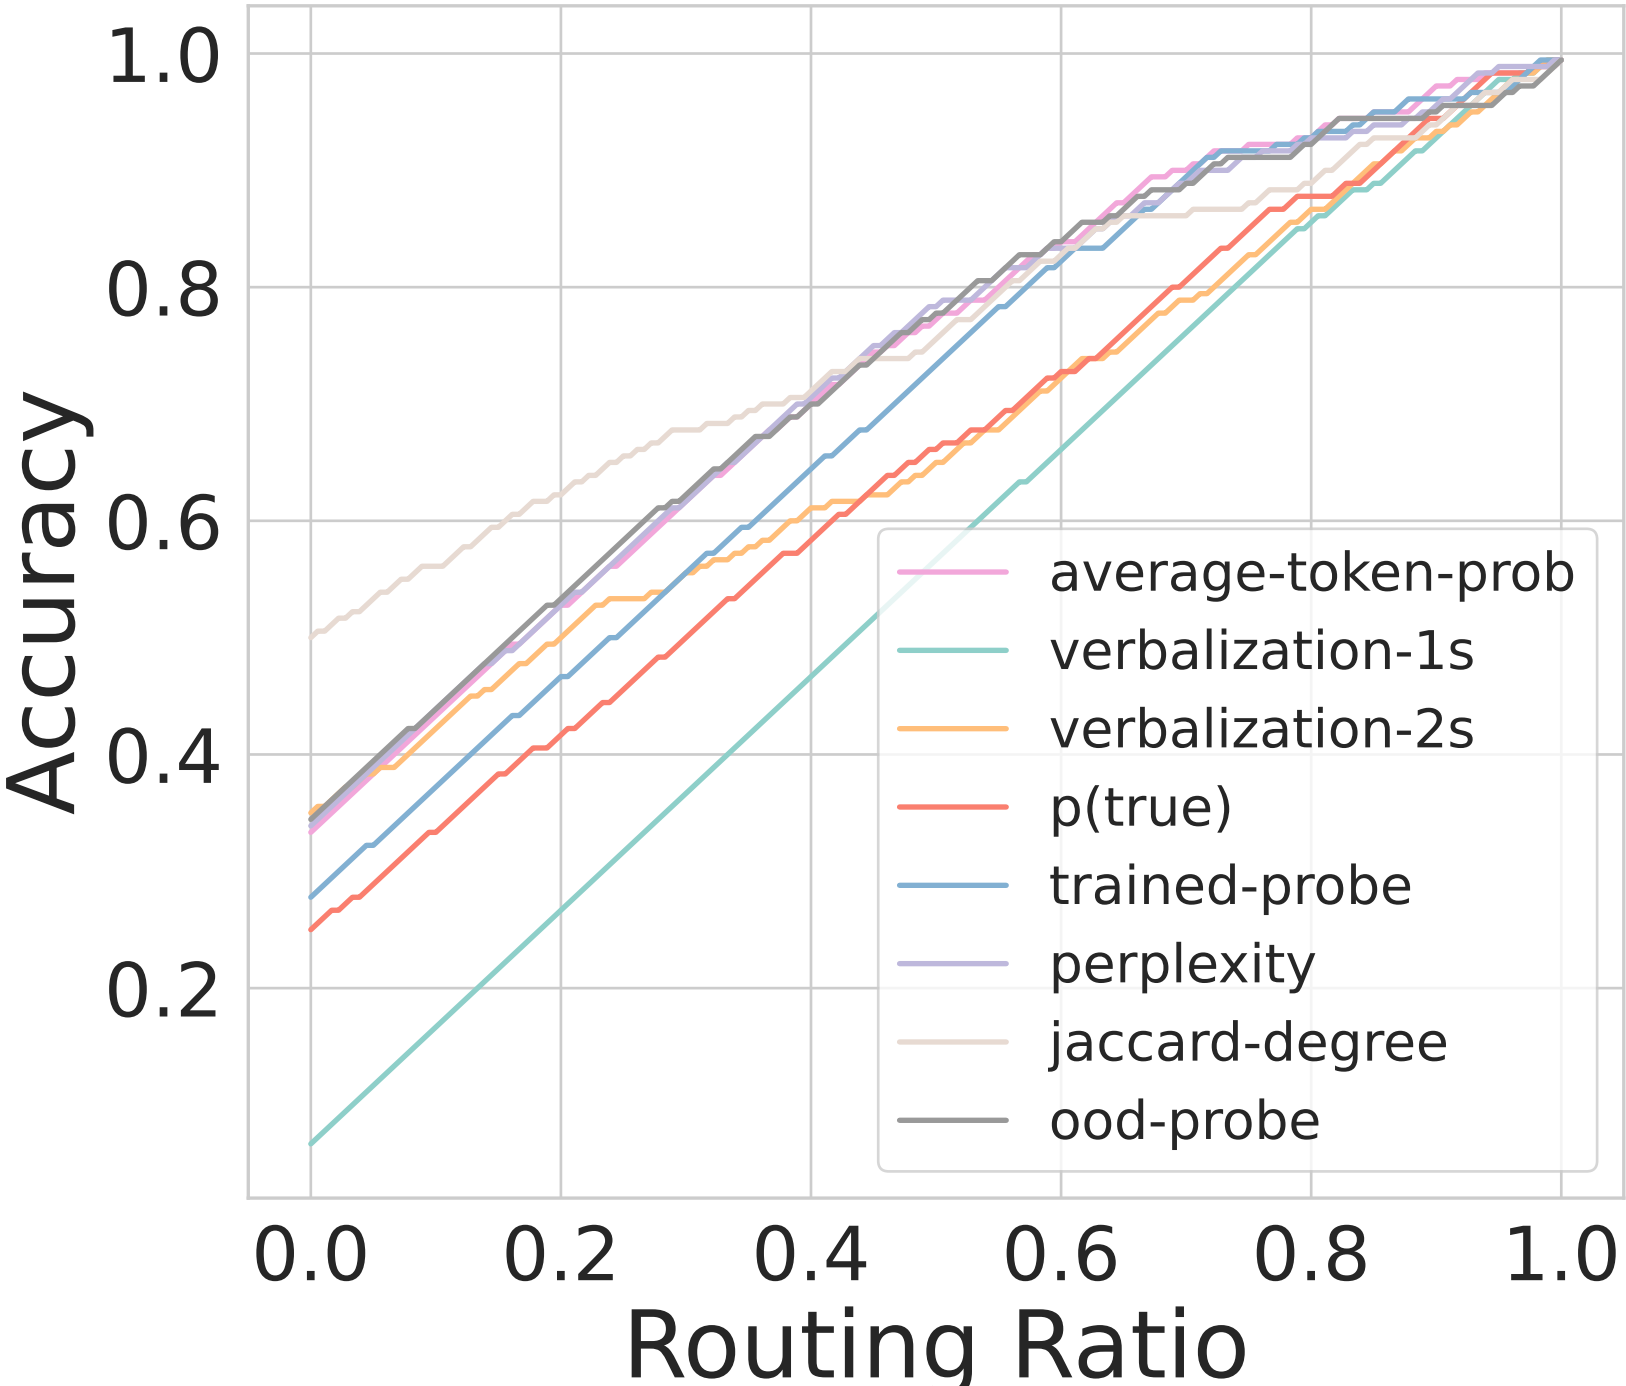

Supplement: supplementary_material [file rr_acc_multiarith_rwkv_gpt41.pdf › Routing_SLM_LLMs/Uncertainty-based Routing/w_legend/to_gpt41/rr_acc_multiarith_rwkv_gpt41.pdf]

# OpenBookQA, Qwen3-1.7B to GPT-4.1 mini

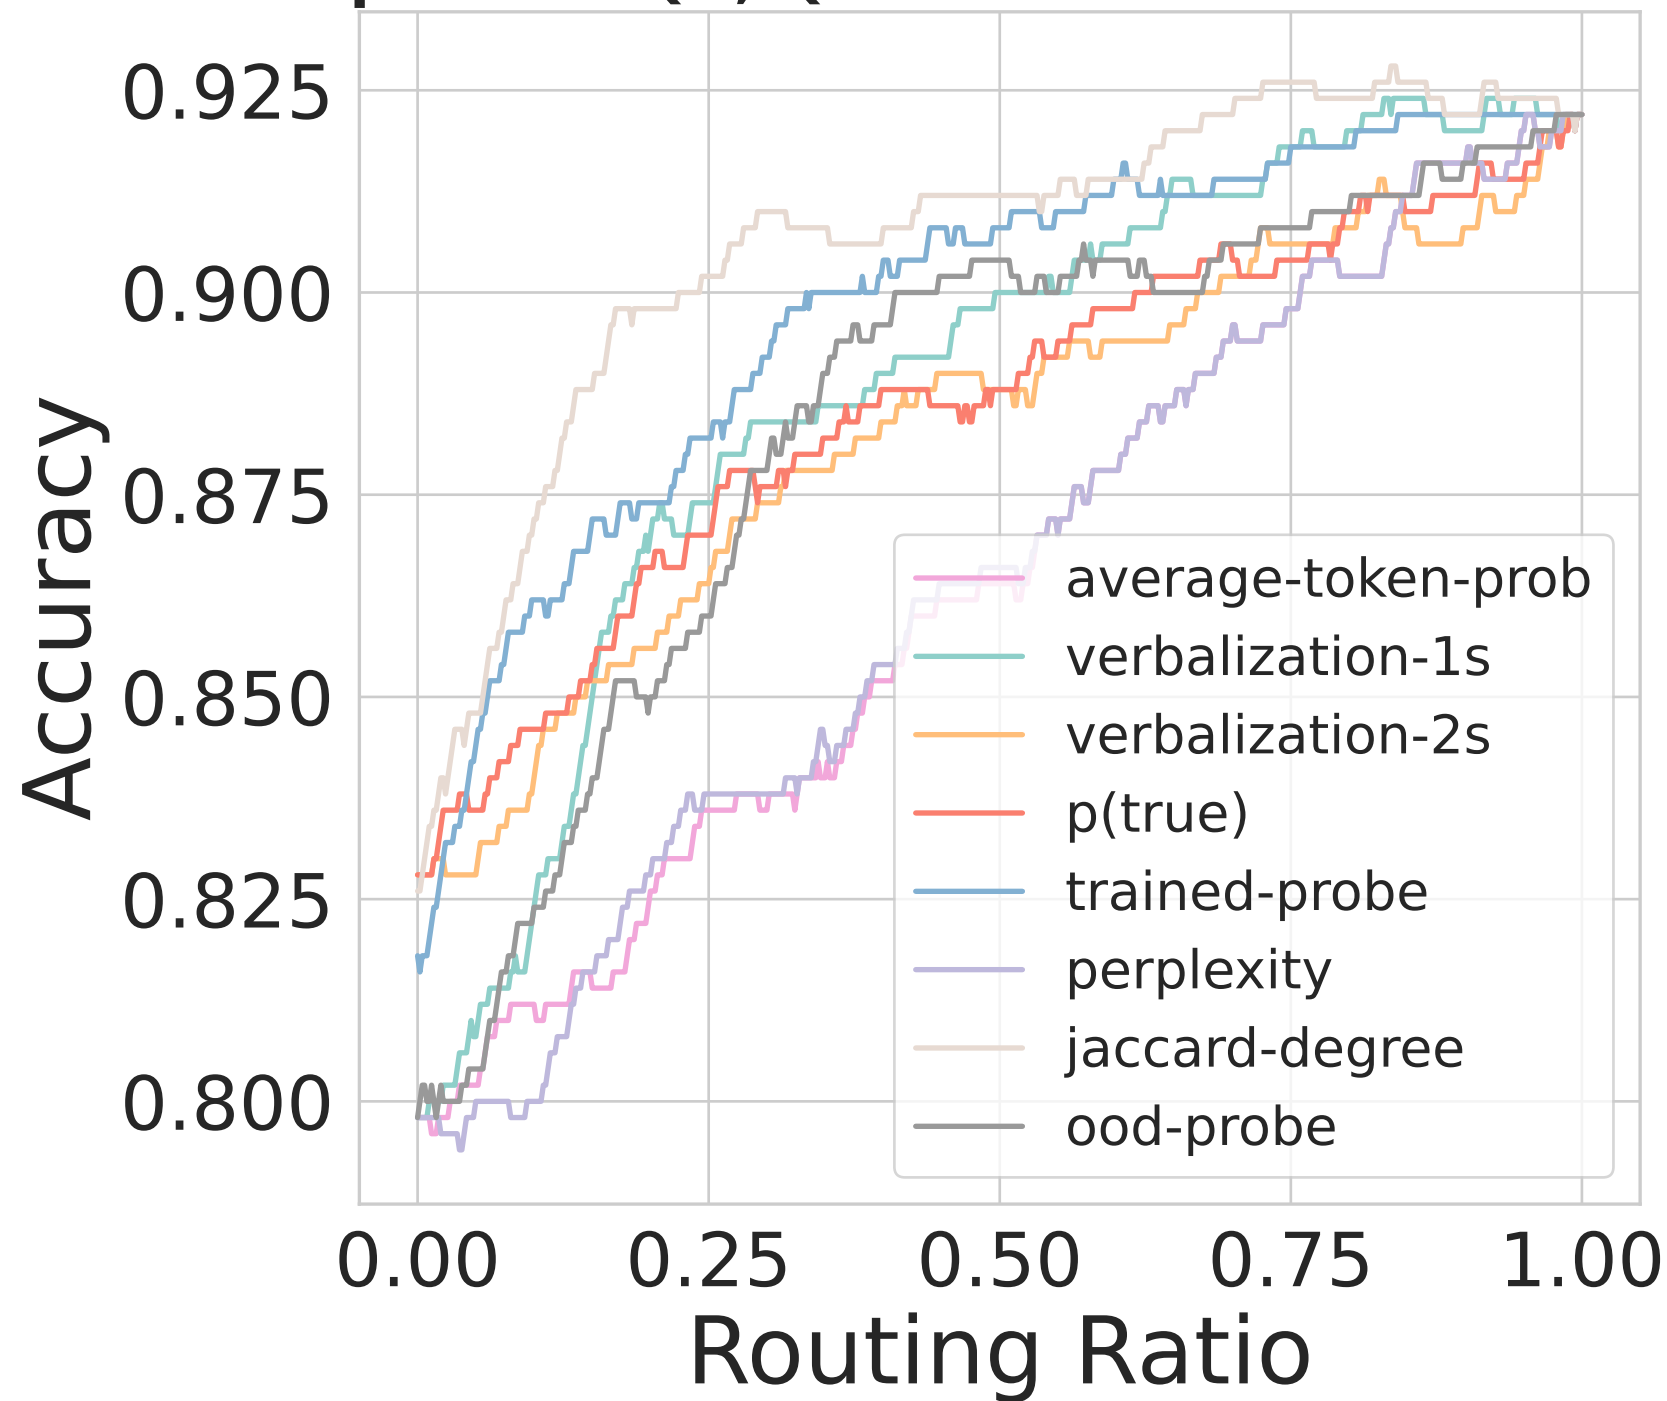

Supplement: supplementary_material [file rr_acc_openbook_qa_Qwen3-1.7B_gpt41.pdf › Routing_SLM_LLMs/Uncertainty-based Routing/w_legend/to_gpt41/rr_acc_openbook_qa_Qwen3-1.7B_gpt41.pdf]

# OpenBookQA, Qwen3-4B to GPT-4.1 mini

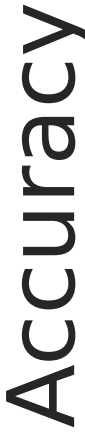

Supplement: supplementary_material [file rr_acc_openbook_qa_Qwen3-4B_gpt41.pdf › Routing_SLM_LLMs/Uncertainty-based Routing/w_legend/to_gpt41/rr_acc_openbook_qa_Qwen3-4B_gpt41.pdf]

# OpenBookQA, granite-3.1-8b to GPT-4.1 mini

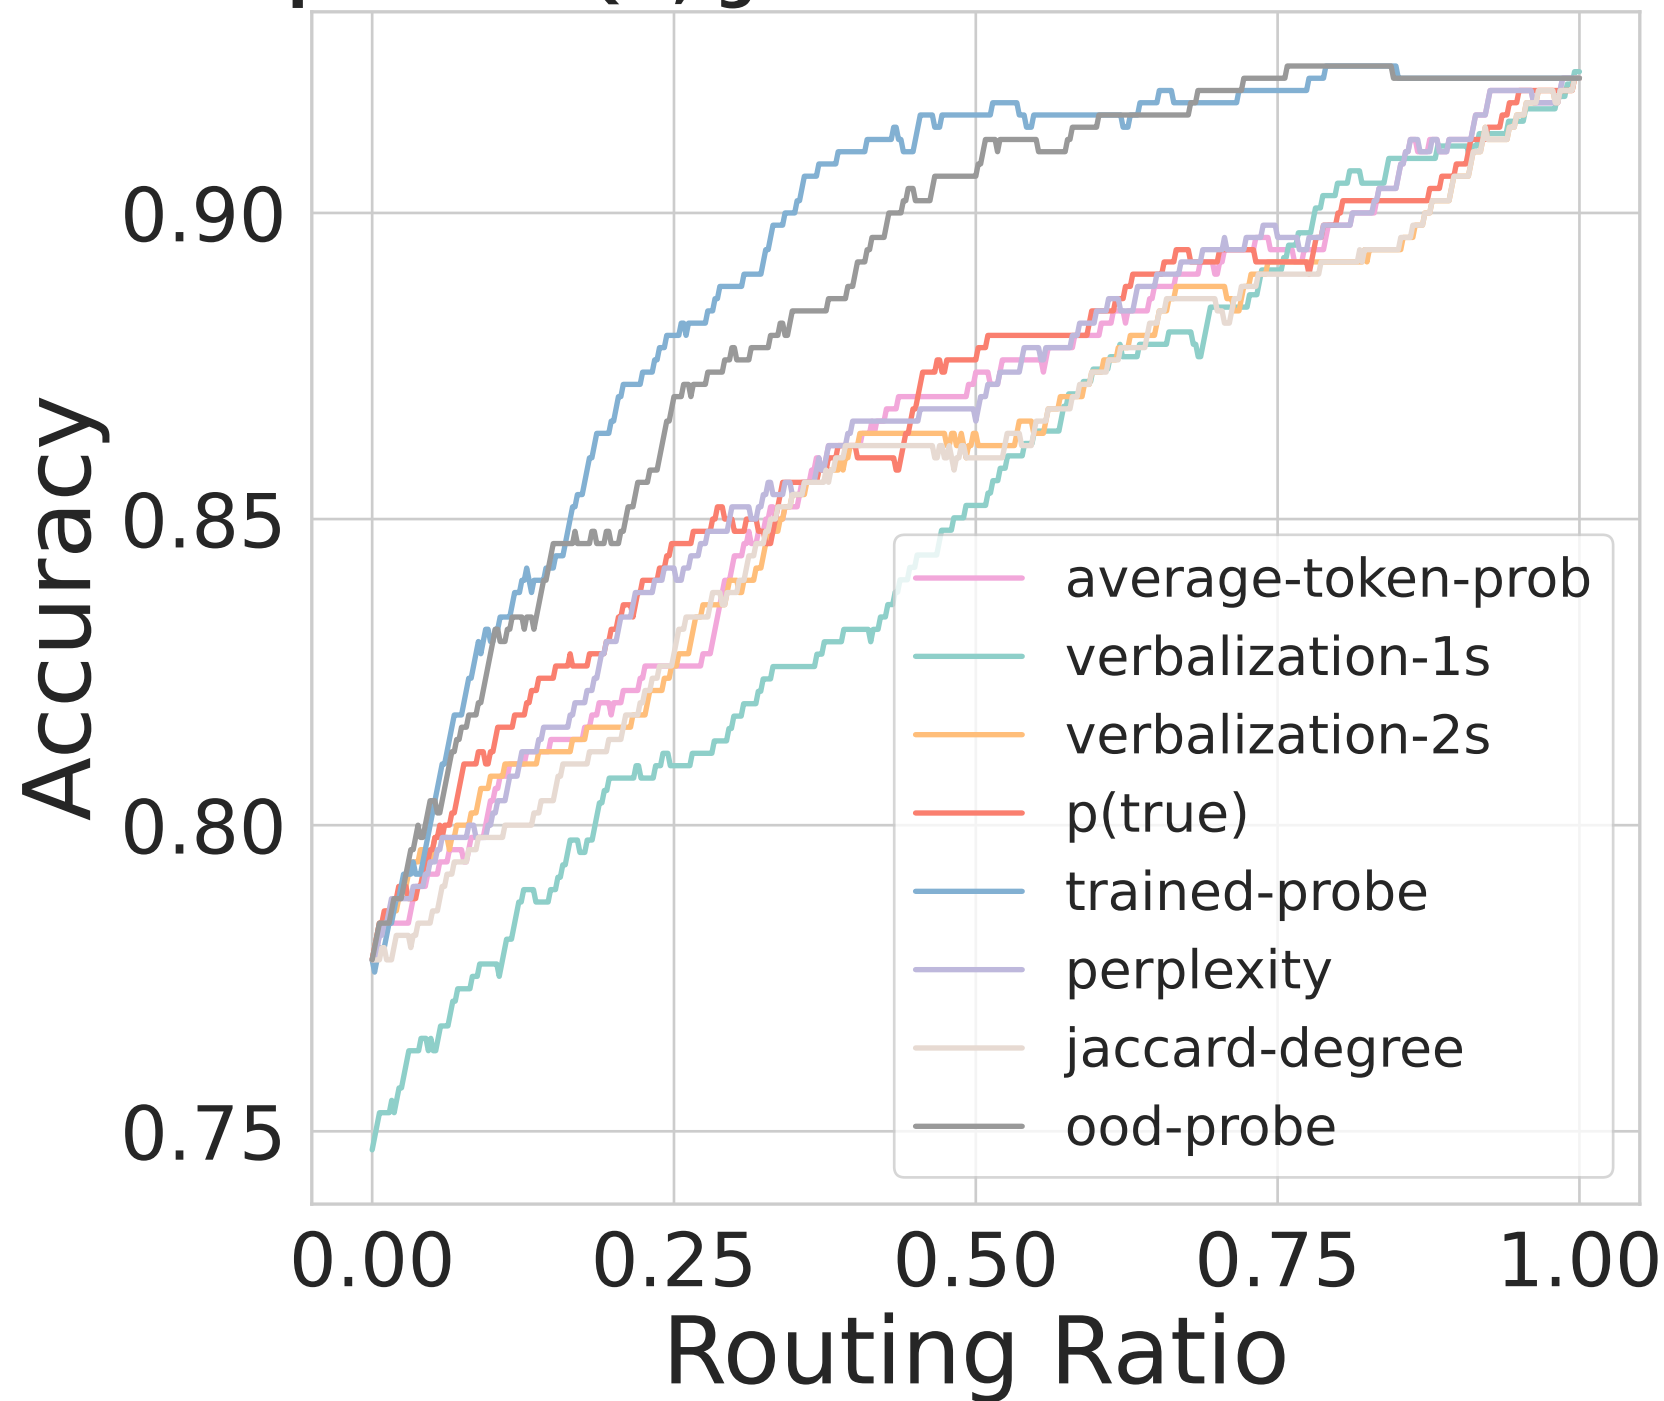

Supplement: supplementary_material [file rr_acc_openbook_qa_granite-3.1-8b_gpt41.pdf › Routing_SLM_LLMs/Uncertainty-based Routing/w_legend/to_gpt41/rr_acc_openbook_qa_granite-3.1-8b_gpt41.pdf]

# OpenBookQA, llama-3.1-8b to GPT-4.1 mini

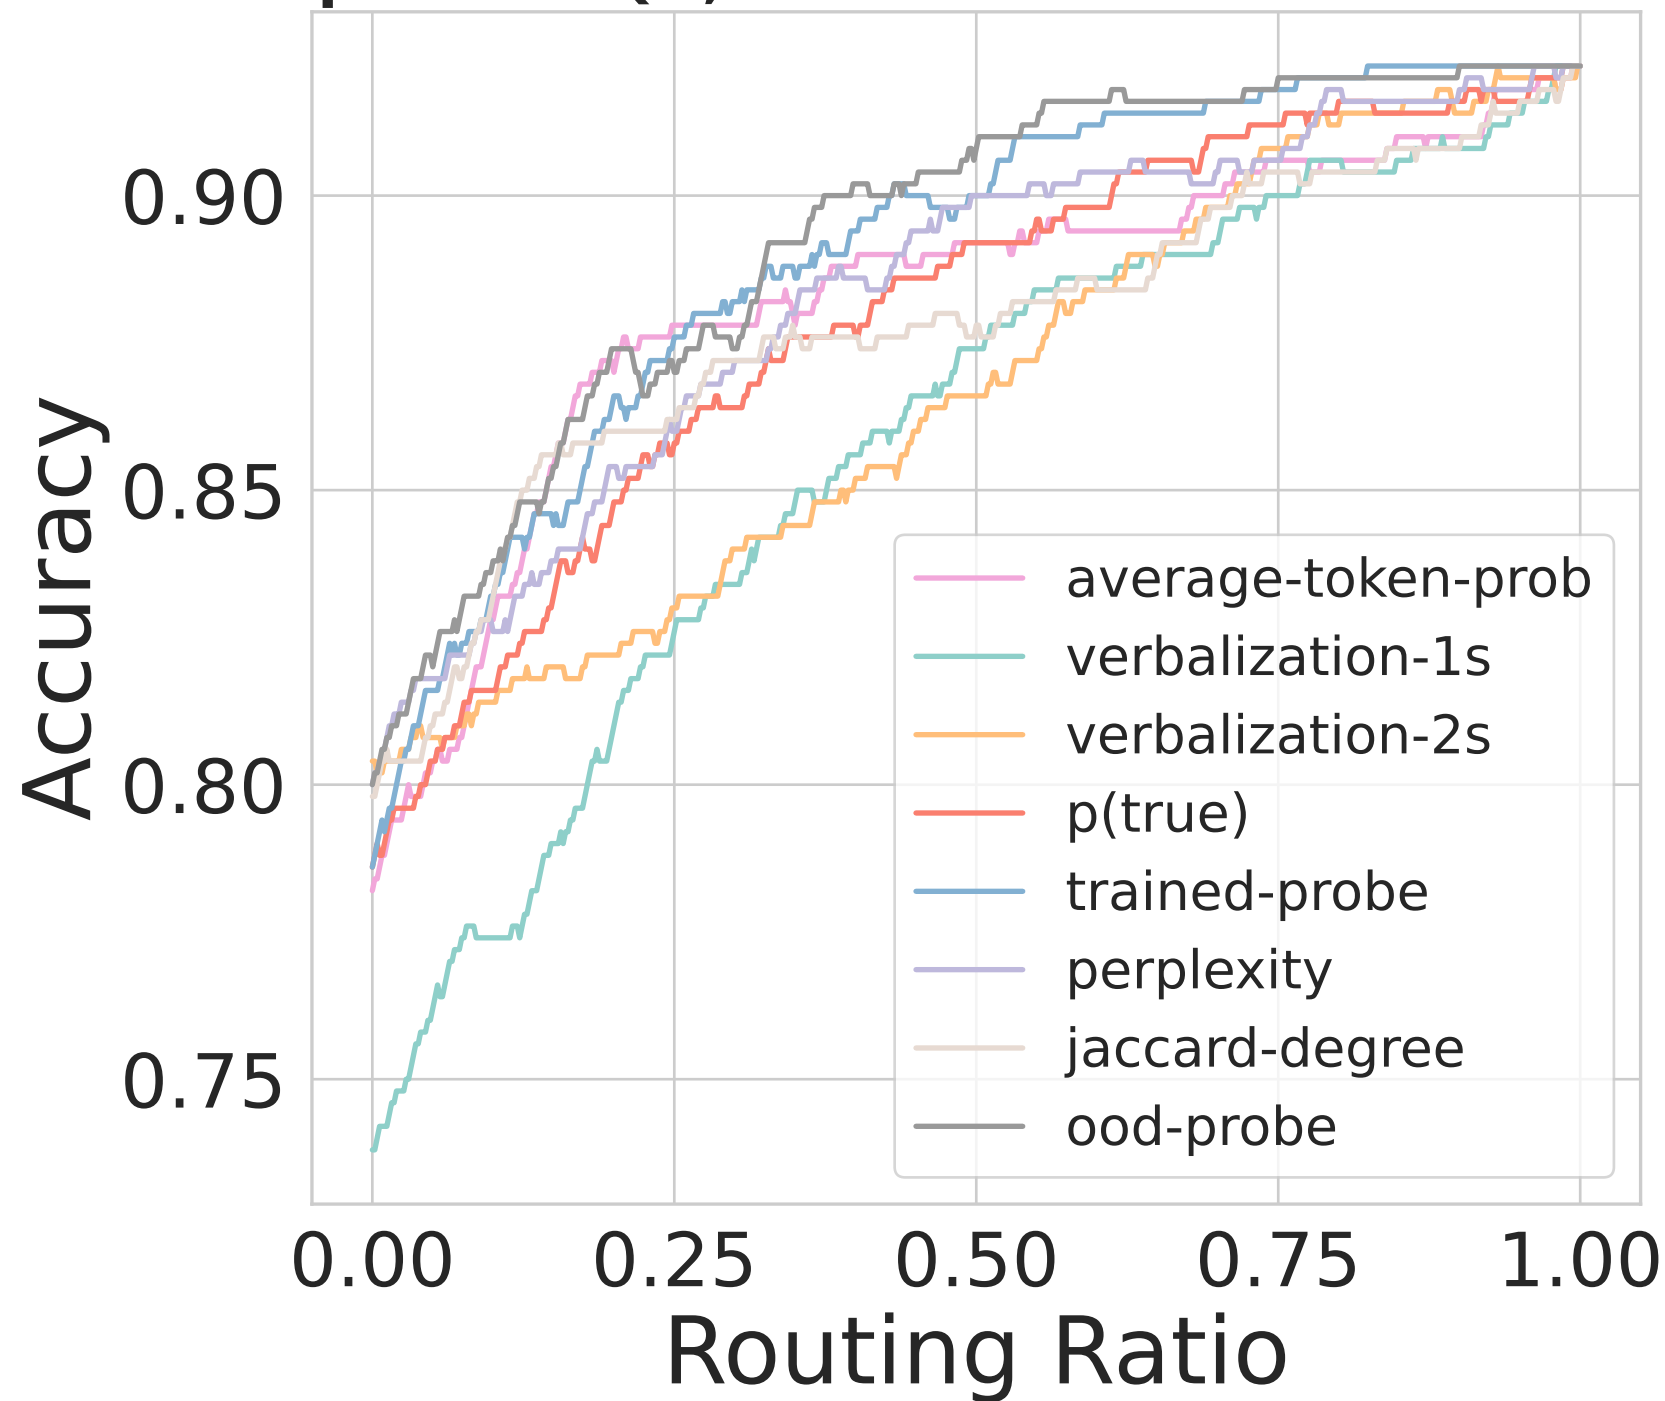

Supplement: supplementary_material [file rr_acc_openbook_qa_llama-3.1-8b_gpt41.pdf › Routing_SLM_LLMs/Uncertainty-based Routing/w_legend/to_gpt41/rr_acc_openbook_qa_llama-3.1-8b_gpt41.pdf]

# OpenBookQA, llama-3.2-3b to GPT-4.1 mini

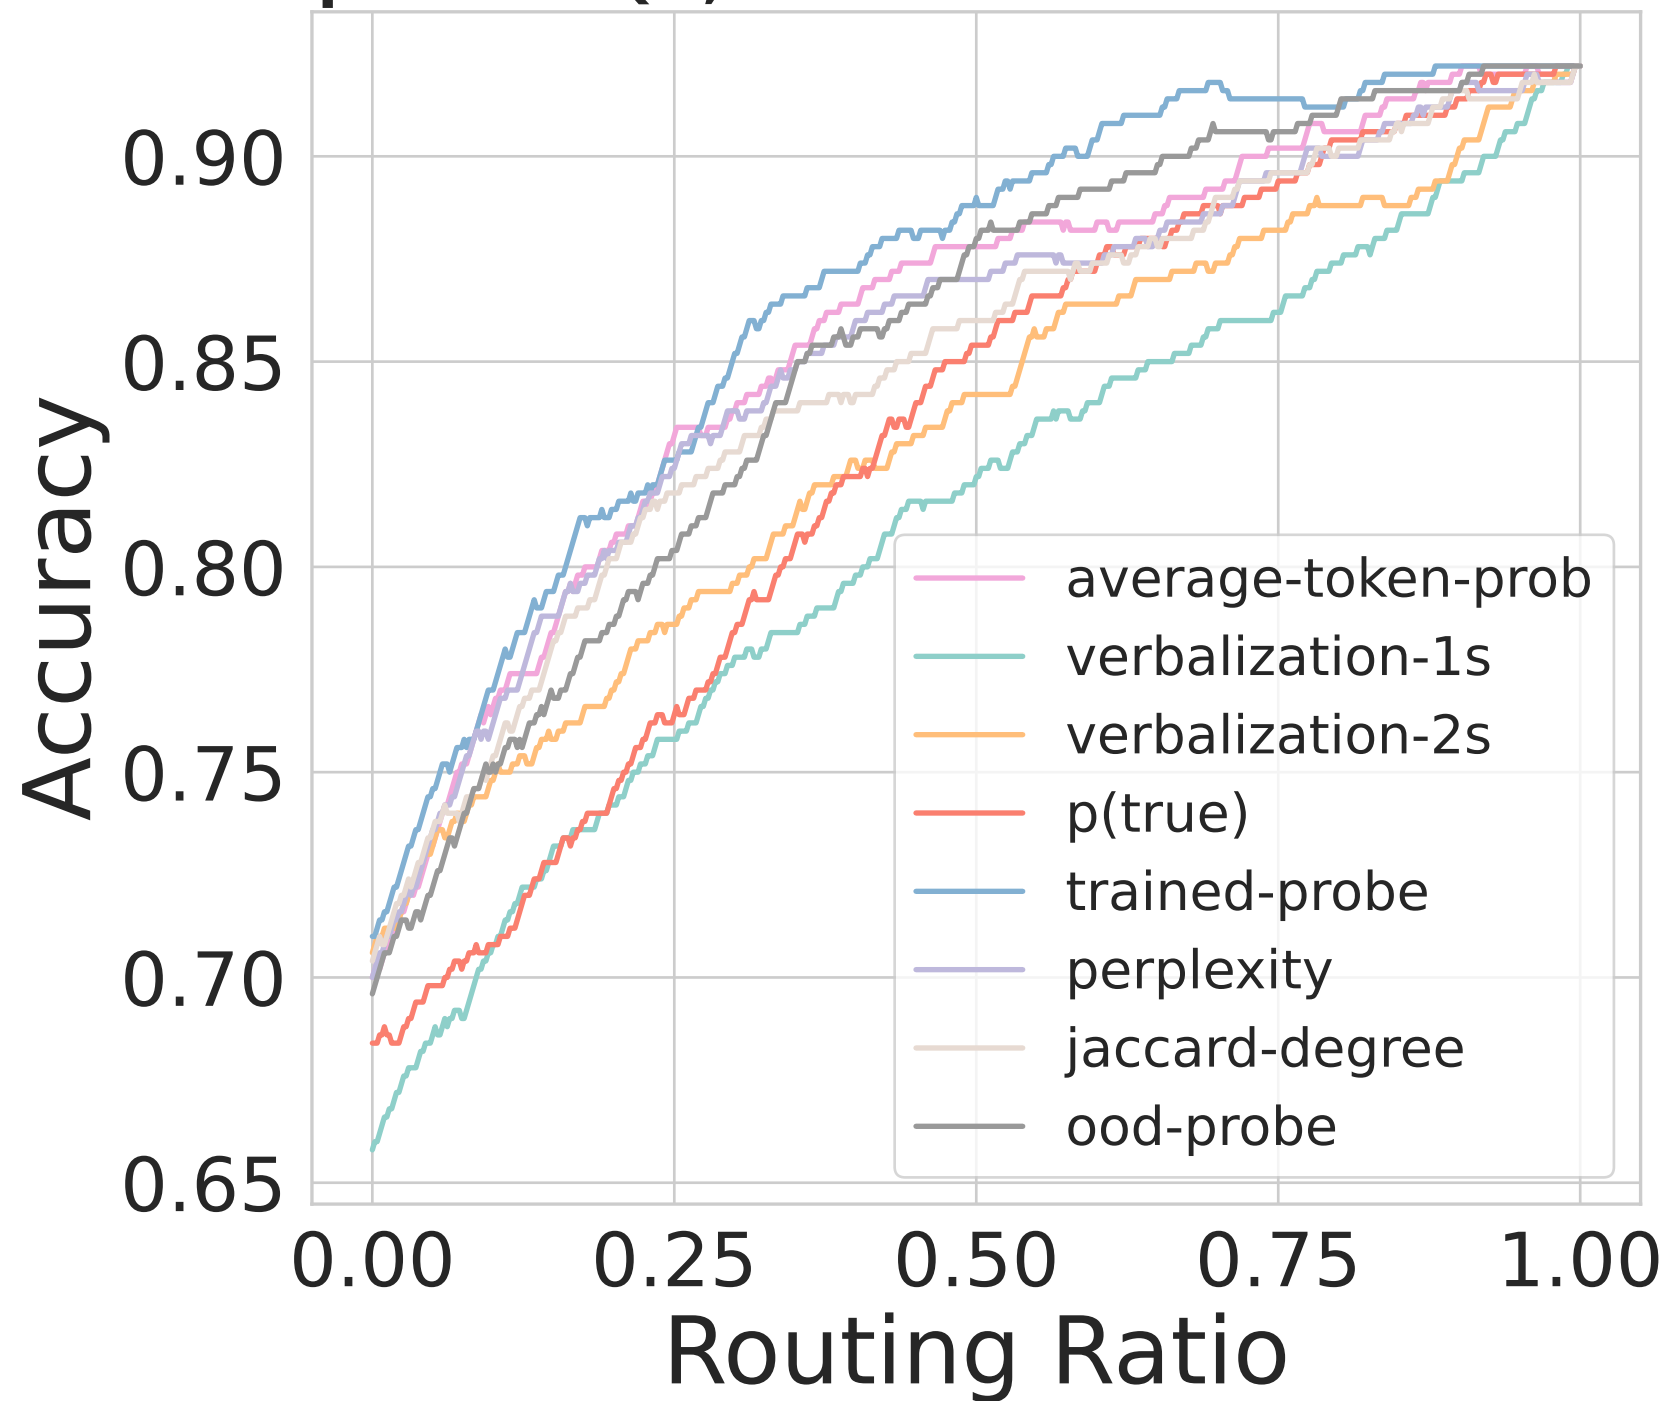

Supplement: supplementary_material [file rr_acc_openbook_qa_llama-3.2-3b_gpt41.pdf › Routing_SLM_LLMs/Uncertainty-based Routing/w_legend/to_gpt41/rr_acc_openbook_qa_llama-3.2-3b_gpt41.pdf]

# OpenBookQA, phi-3.5-mini to GPT-4.1 mini

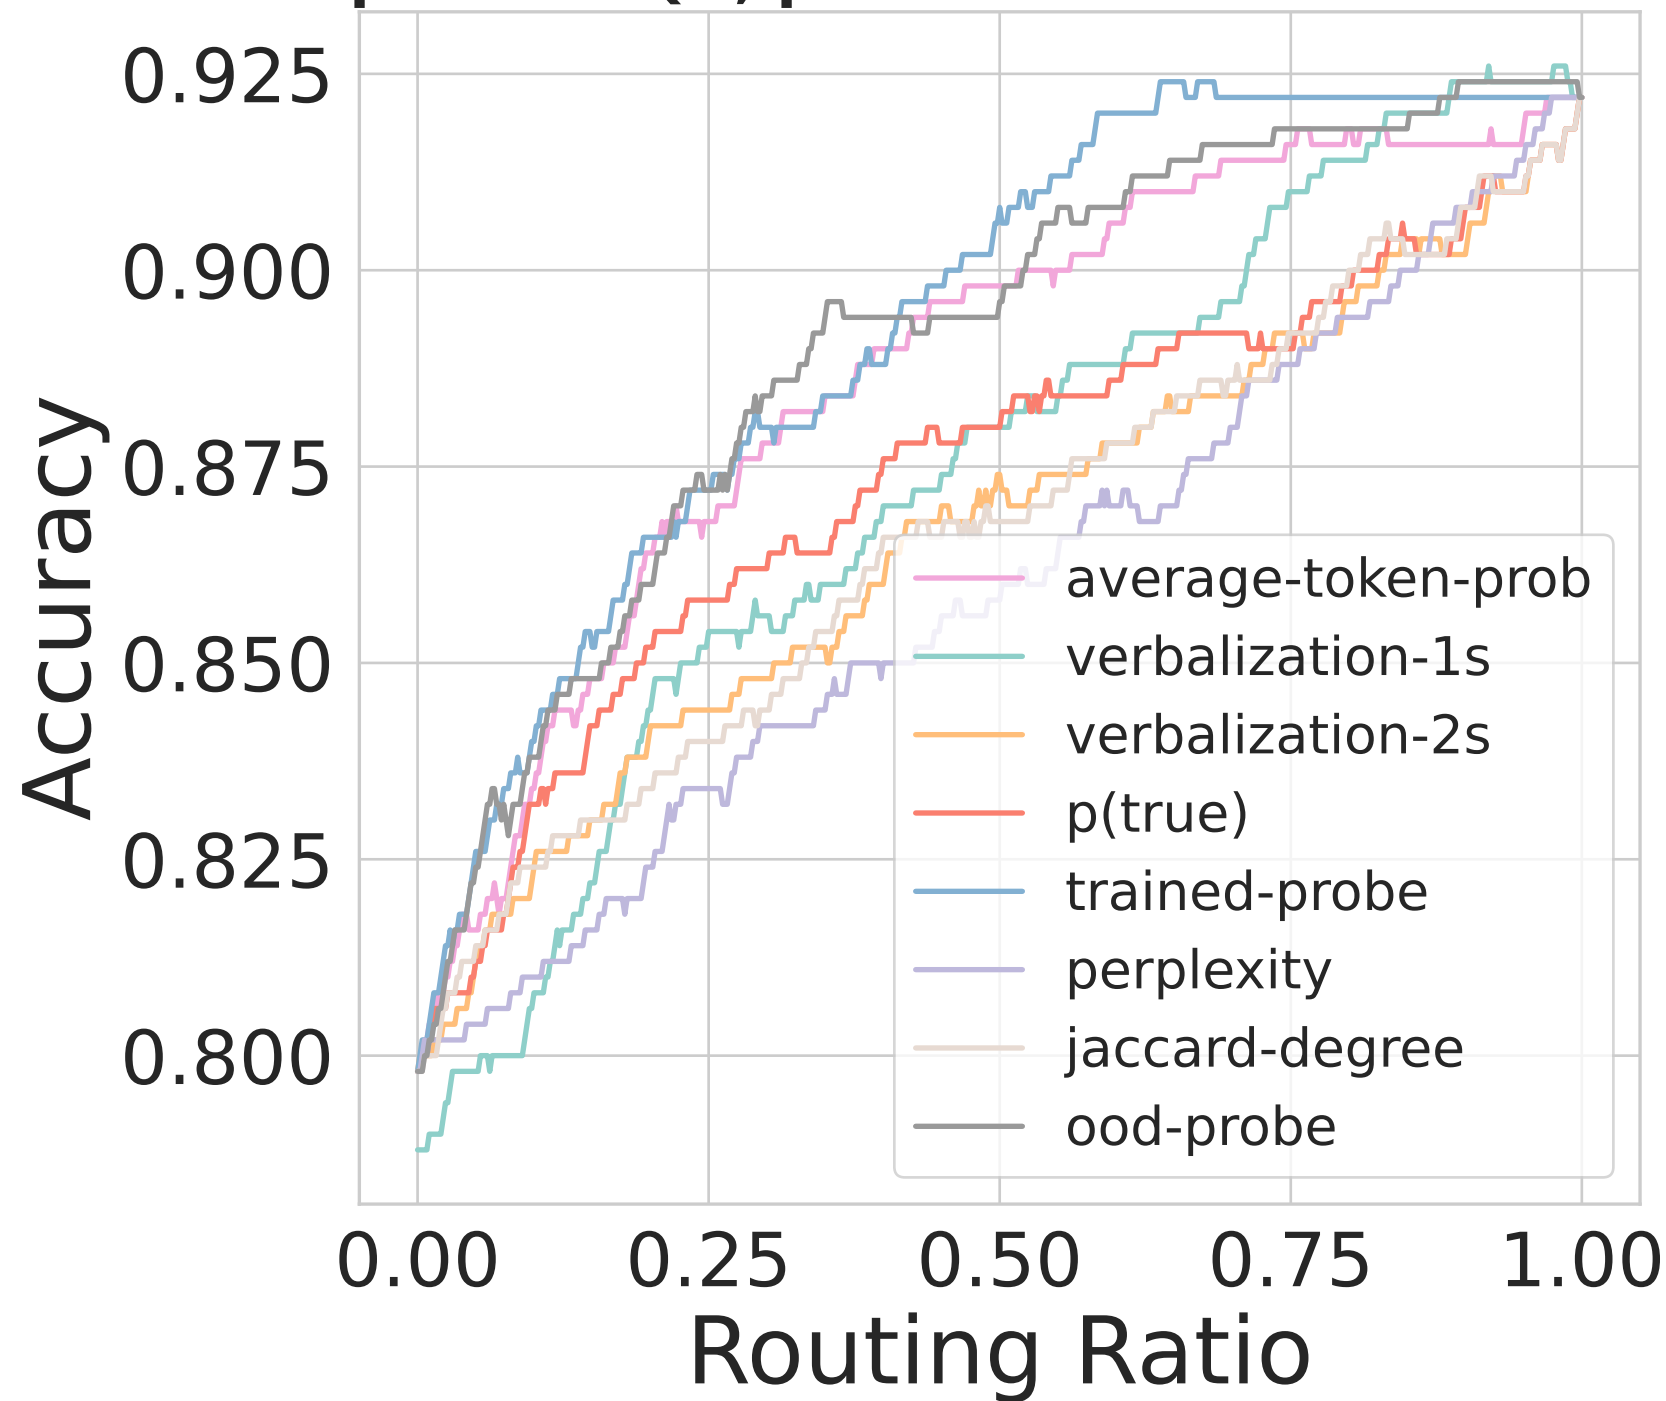

Supplement: supplementary_material [file rr_acc_openbook_qa_phi-3.5-mini_gpt41.pdf › Routing_SLM_LLMs/Uncertainty-based Routing/w_legend/to_gpt41/rr_acc_openbook_qa_phi-3.5-mini_gpt41.pdf]

# OpenBookQA, phi-4-mini-reasoning to GPT-4.1 mini

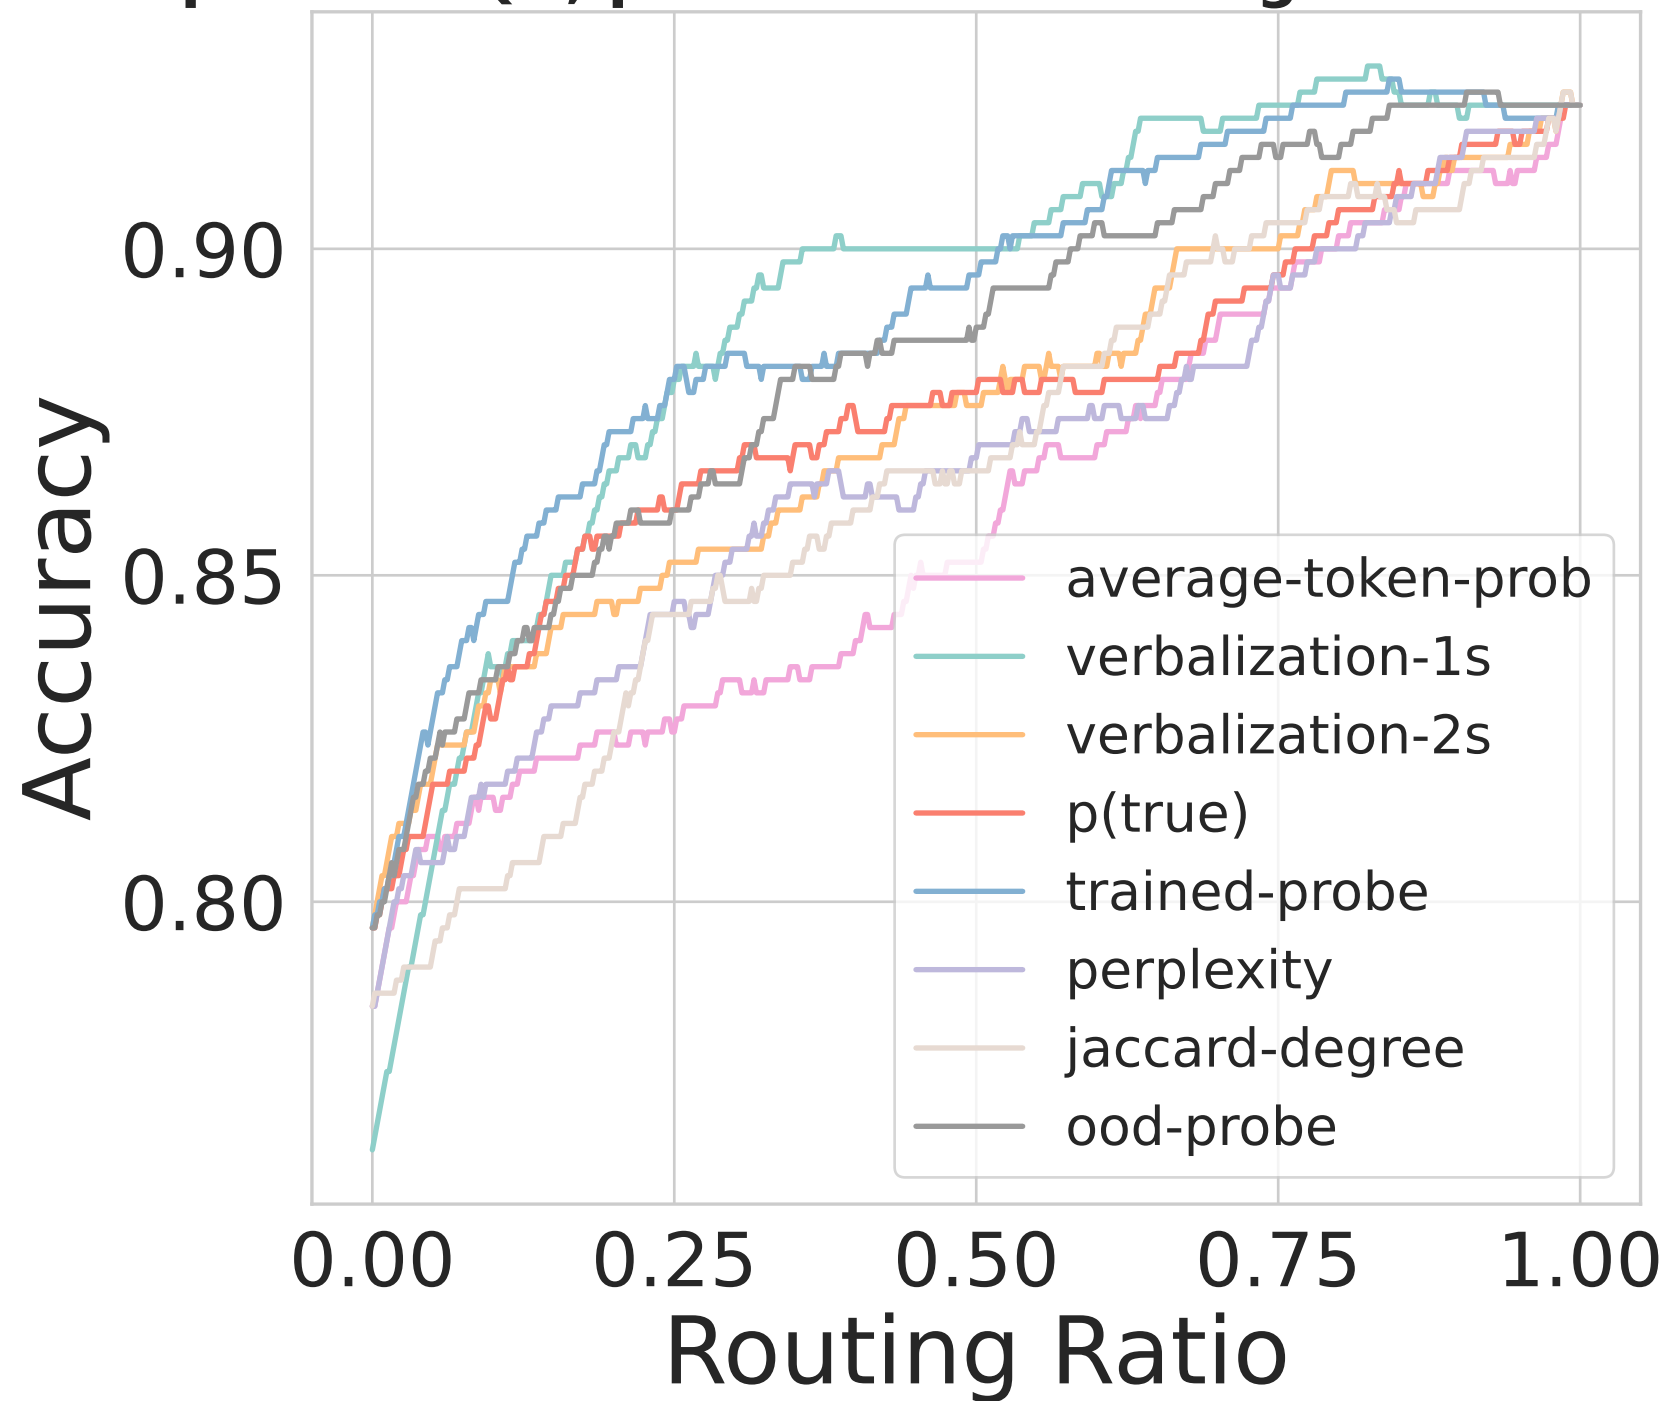

Supplement: supplementary_material [file rr_acc_openbook_qa_phi-4-mini-reasoning_gpt41.pdf › Routing_SLM_LLMs/Uncertainty-based Routing/w_legend/to_gpt41/rr_acc_openbook_qa_phi-4-mini-reasoning_gpt41.pdf]

# OpenBookQA, qwen-2.5-7b to GPT-4.1 mini

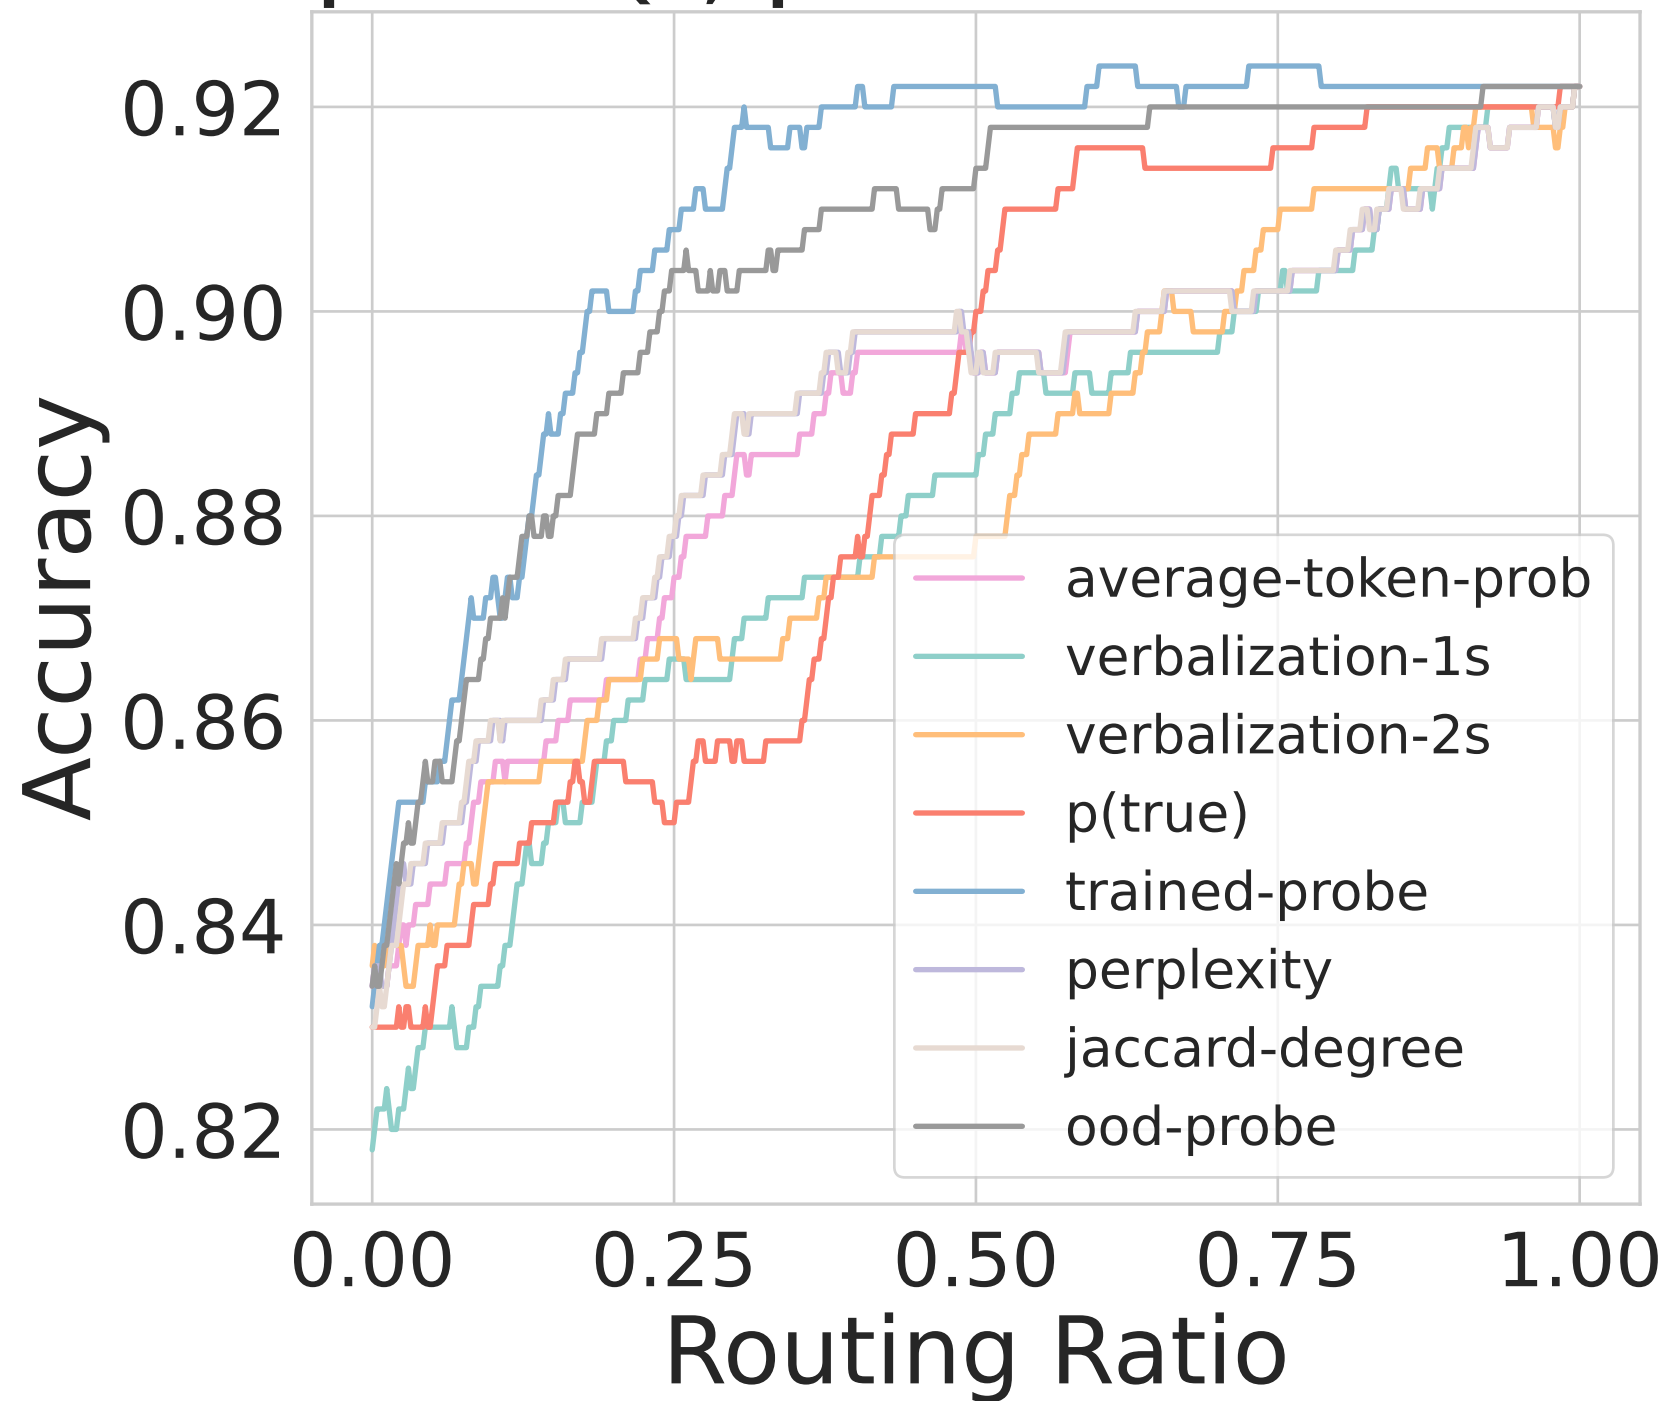

Supplement: supplementary_material [file rr_acc_openbook_qa_qwen-2.5-7b_gpt41.pdf › Routing_SLM_LLMs/Uncertainty-based Routing/w_legend/to_gpt41/rr_acc_openbook_qa_qwen-2.5-7b_gpt41.pdf]

# OpenBookQA, rwkv to GPT-4.1 mini

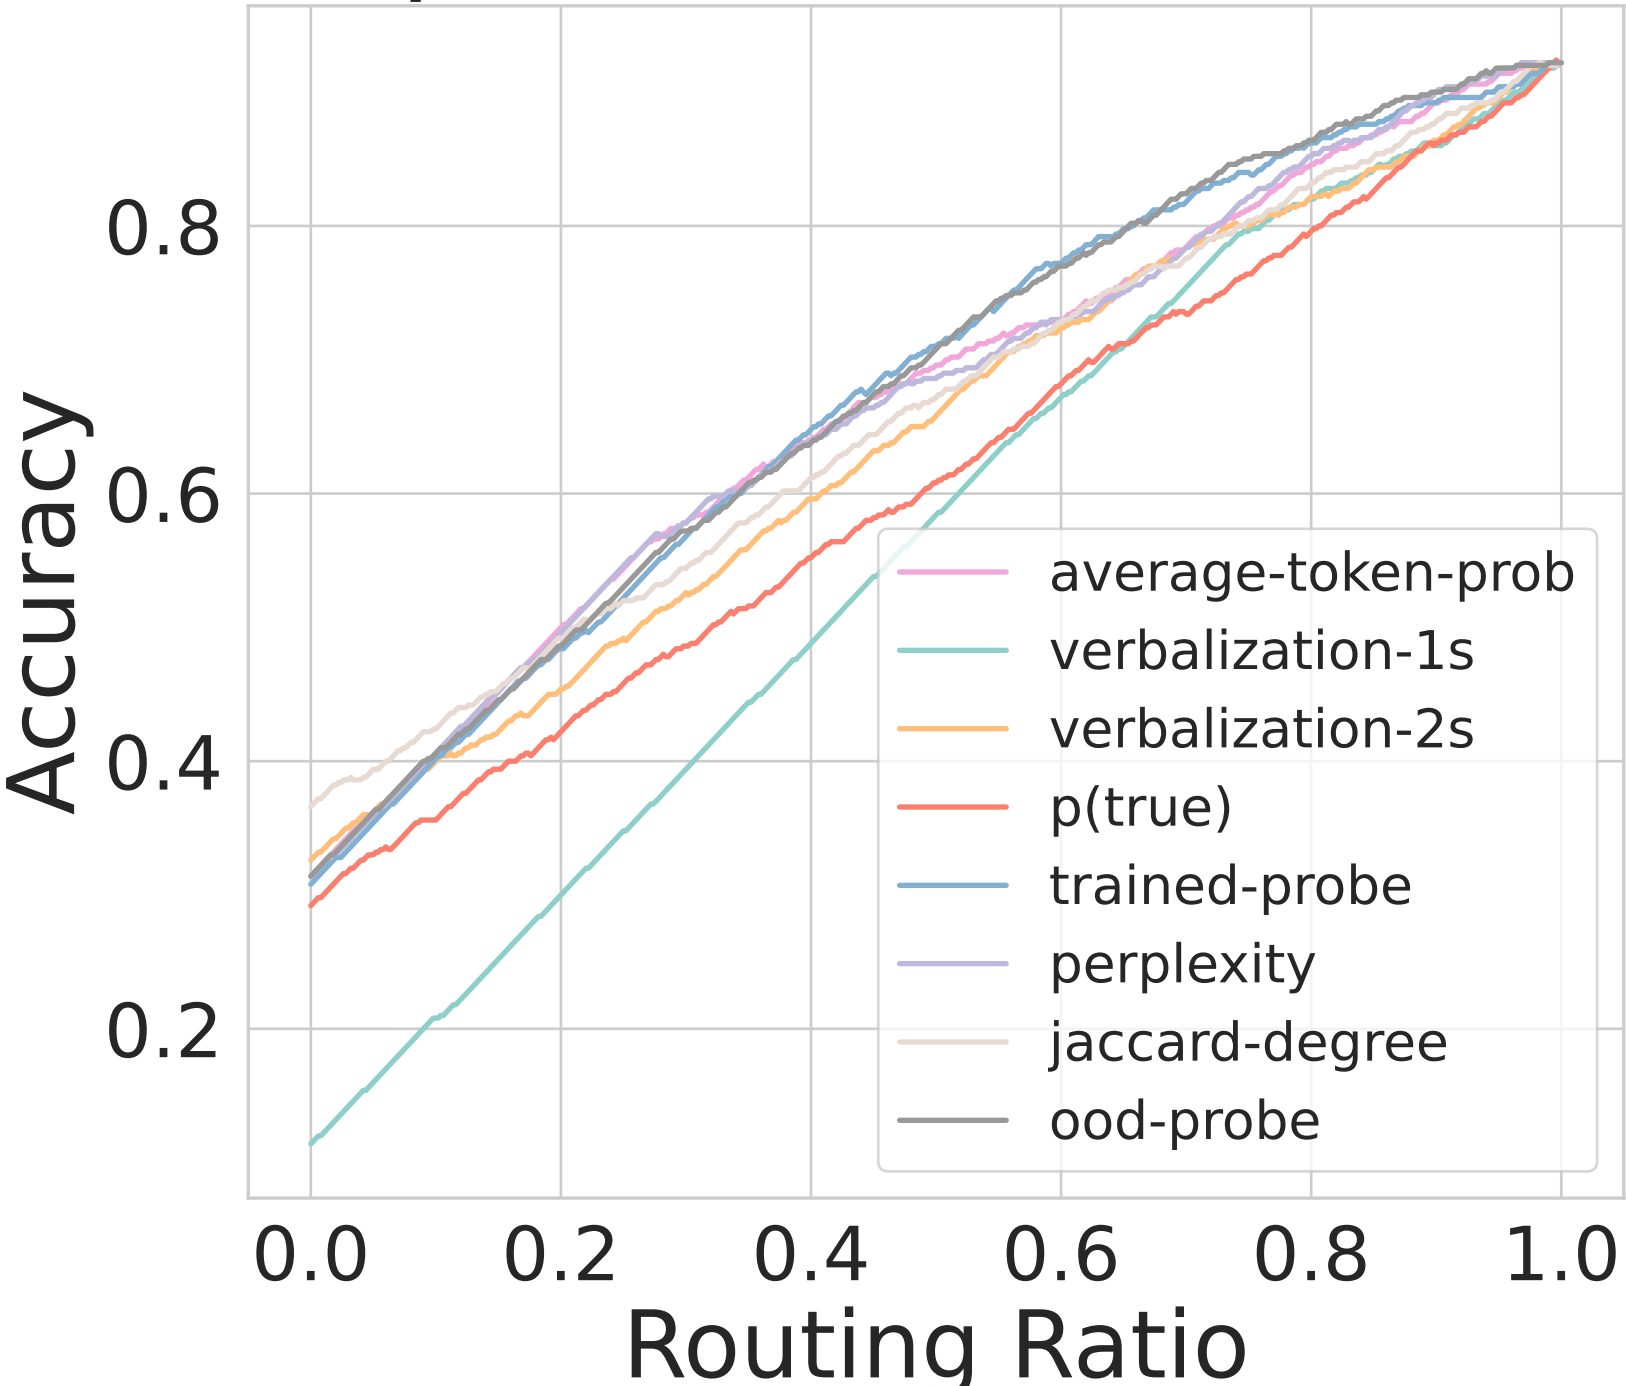

Supplement: supplementary_material [file rr_acc_openbook_qa_rwkv_gpt41.pdf › Routing_SLM_LLMs/Uncertainty-based Routing/w_legend/to_gpt41/rr_acc_openbook_qa_rwkv_gpt41.pdf]

**PIQA, Qwen3-0.6B to GPT-4.1 mini**

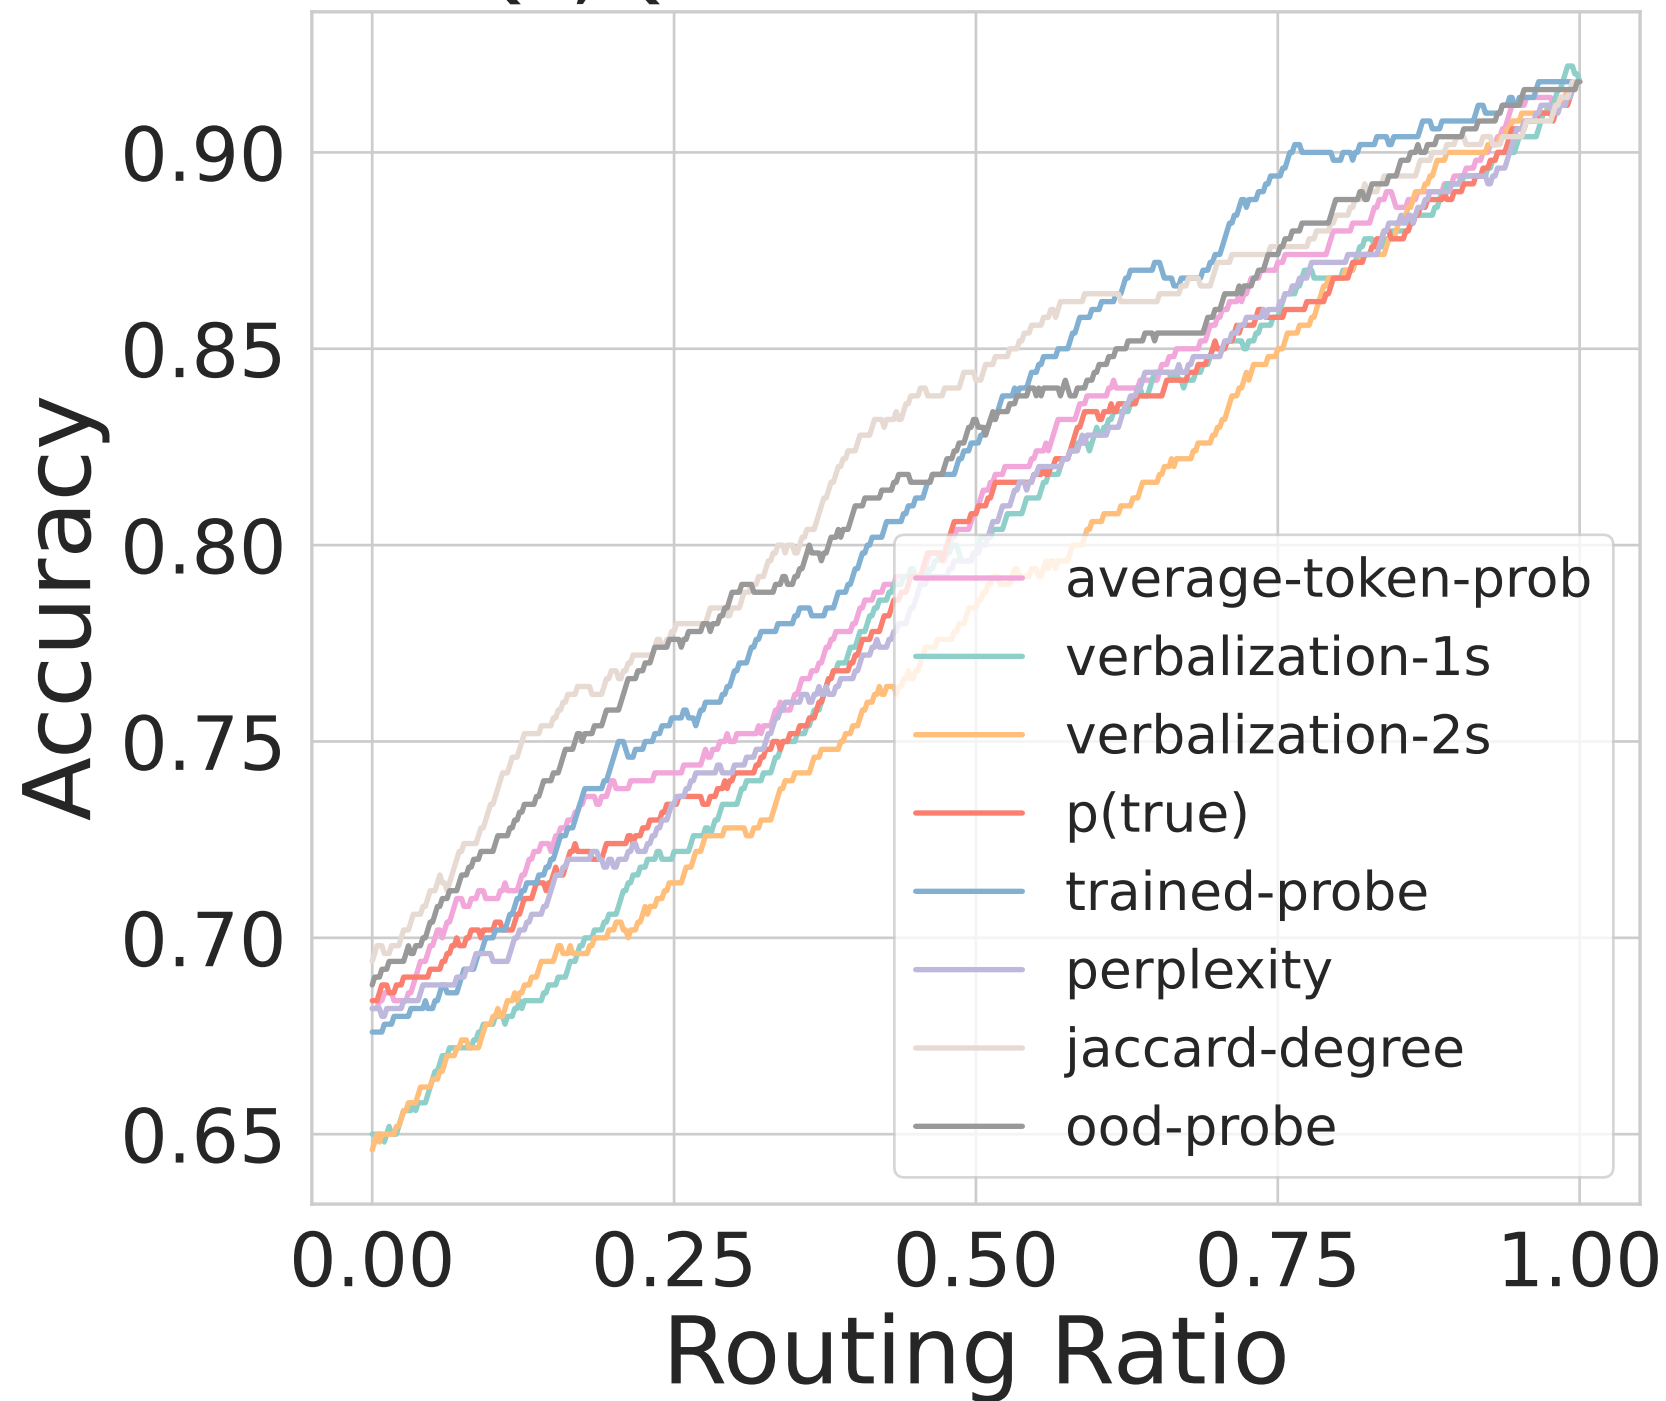

Supplement: supplementary_material [file rr_acc_pi_qa_Qwen3-0.6B_gpt41.pdf › Routing_SLM_LLMs/Uncertainty-based Routing/w_legend/to_gpt41/rr_acc_pi_qa_Qwen3-0.6B_gpt41.pdf]

**PIQA, Qwen3-1.7B to GPT-4.1 mini**

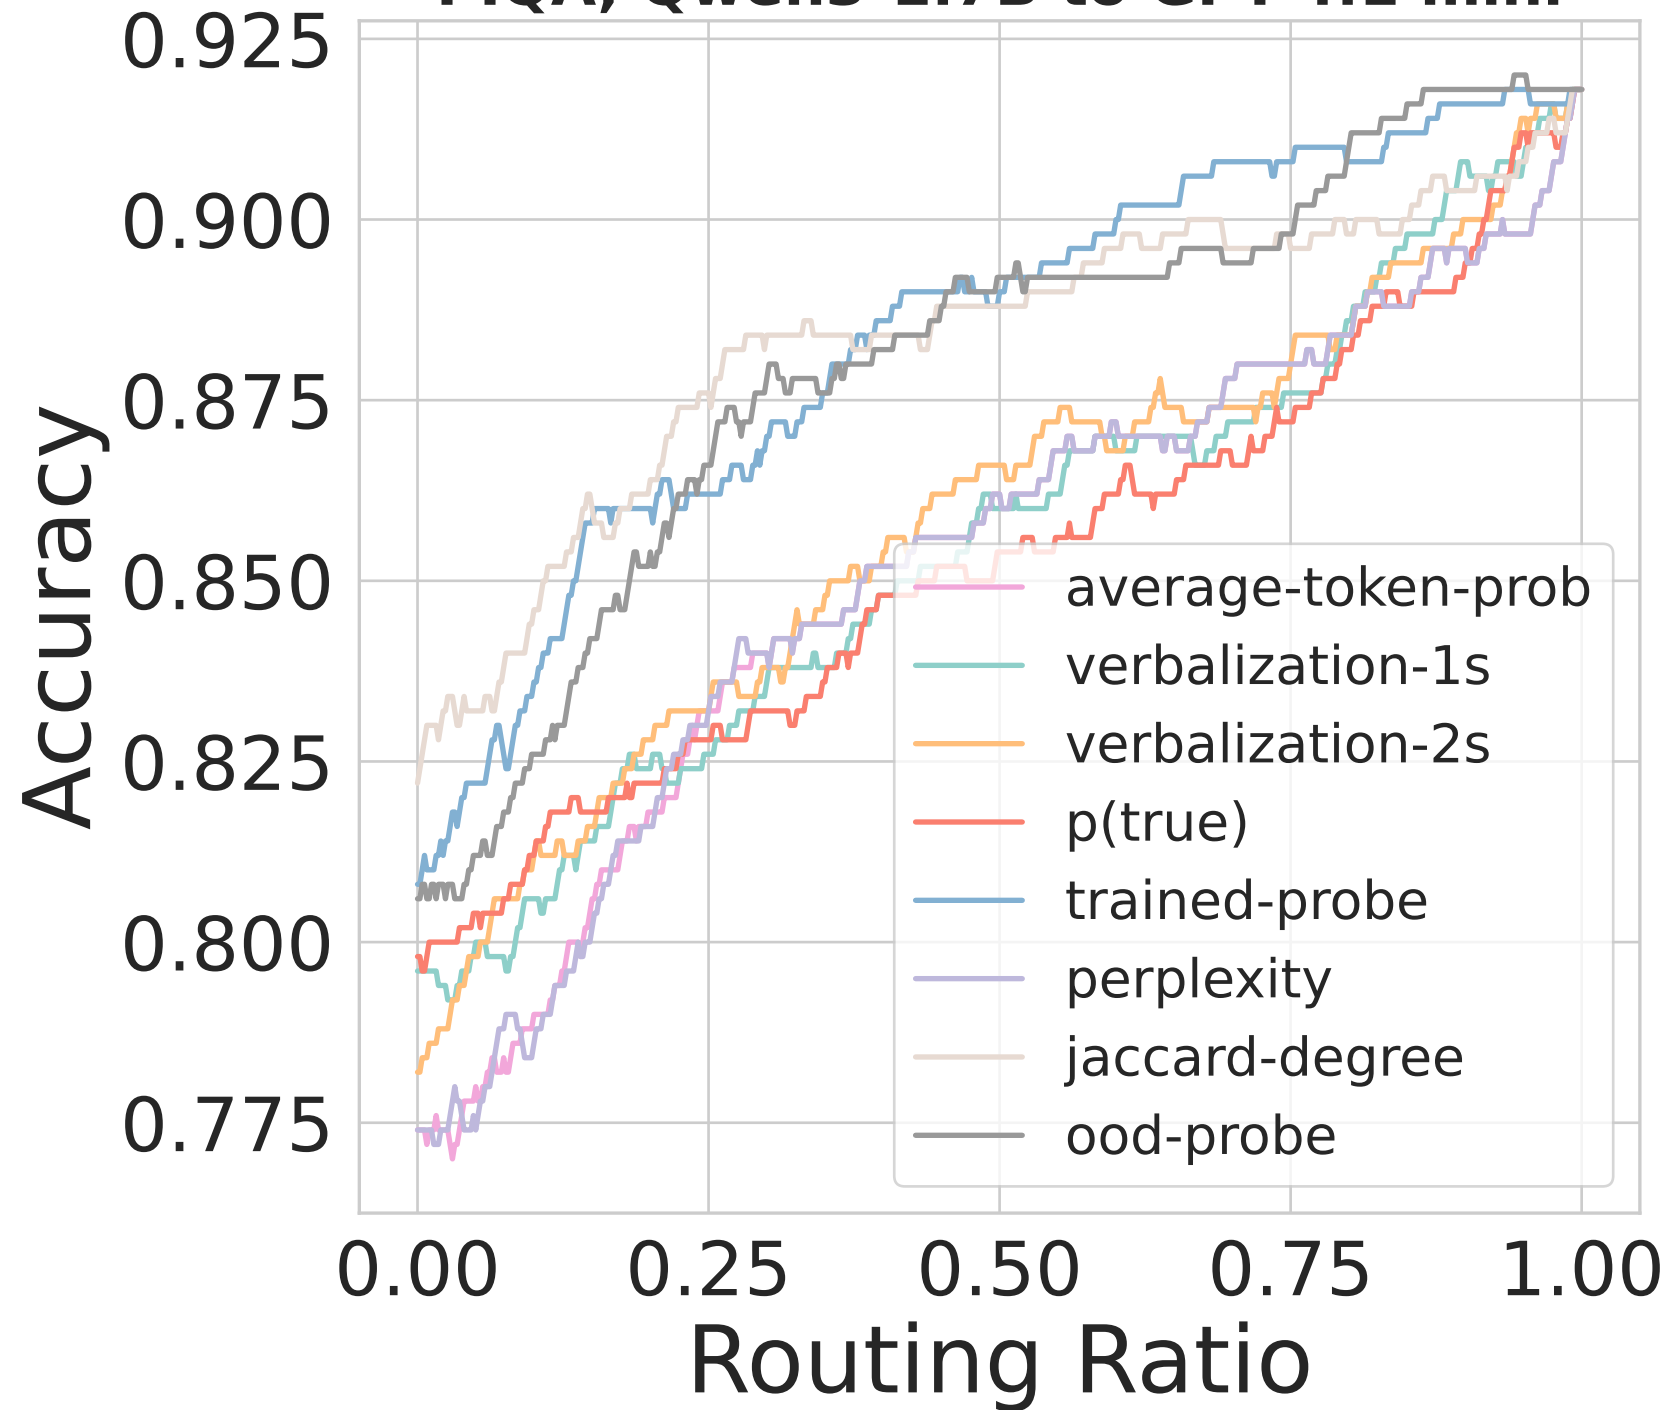

Supplement: supplementary_material [file rr_acc_pi_qa_Qwen3-1.7B_gpt41.pdf › Routing_SLM_LLMs/Uncertainty-based Routing/w_legend/to_gpt41/rr_acc_pi_qa_Qwen3-1.7B_gpt41.pdf]

# PIQA, Qwen3-4B to GPT-4.1 mini

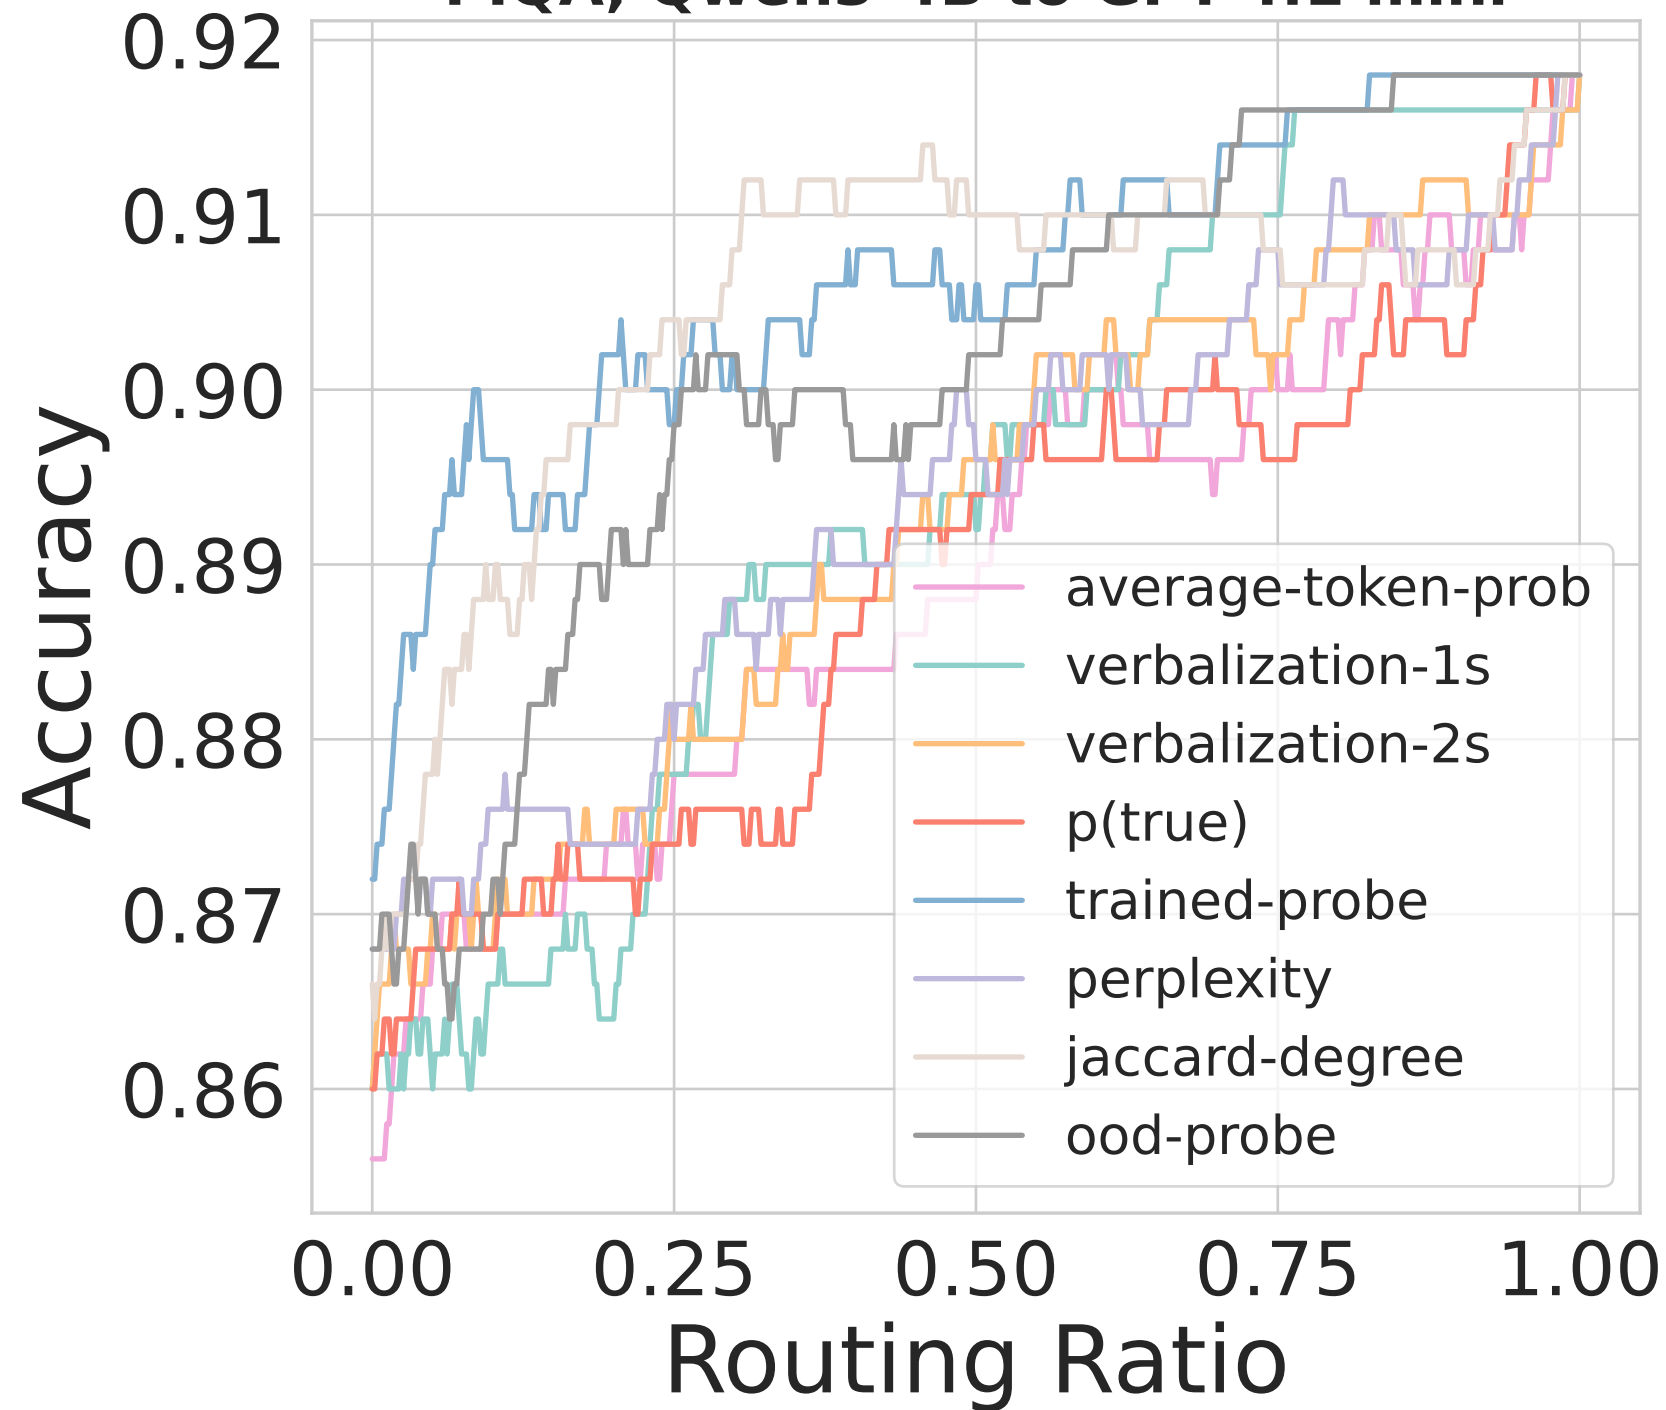

Supplement: supplementary_material [file rr_acc_pi_qa_Qwen3-4B_gpt41.pdf › Routing_SLM_LLMs/Uncertainty-based Routing/w_legend/to_gpt41/rr_acc_pi_qa_Qwen3-4B_gpt41.pdf]

**PIQA, granite-3.1-8b to GPT-4.1 mini**

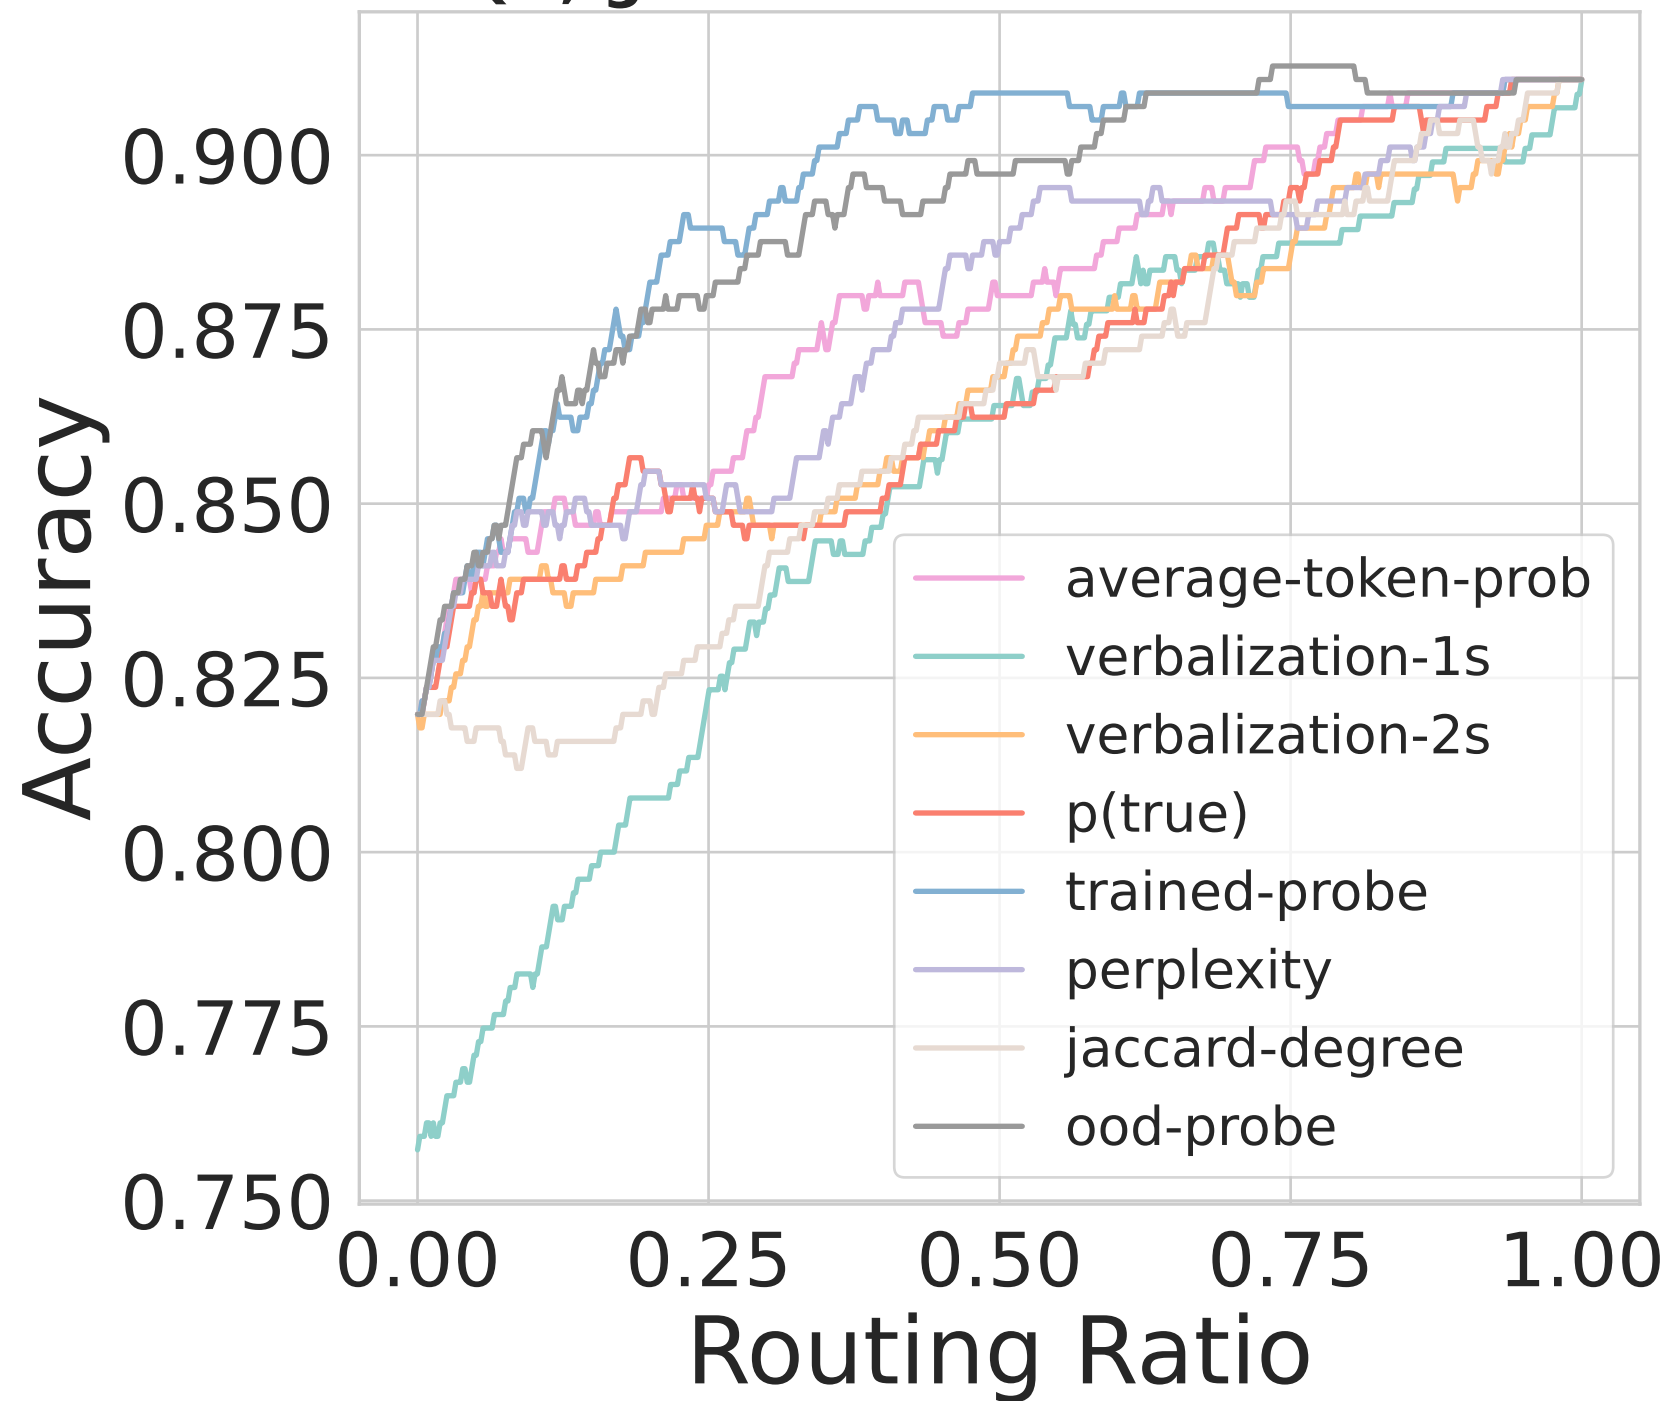

Supplement: supplementary_material [file rr_acc_pi_qa_granite-3.1-8b_gpt41.pdf › Routing_SLM_LLMs/Uncertainty-based Routing/w_legend/to_gpt41/rr_acc_pi_qa_granite-3.1-8b_gpt41.pdf]

**PIQA, llama-3.1-8b to GPT-4.1 mini**

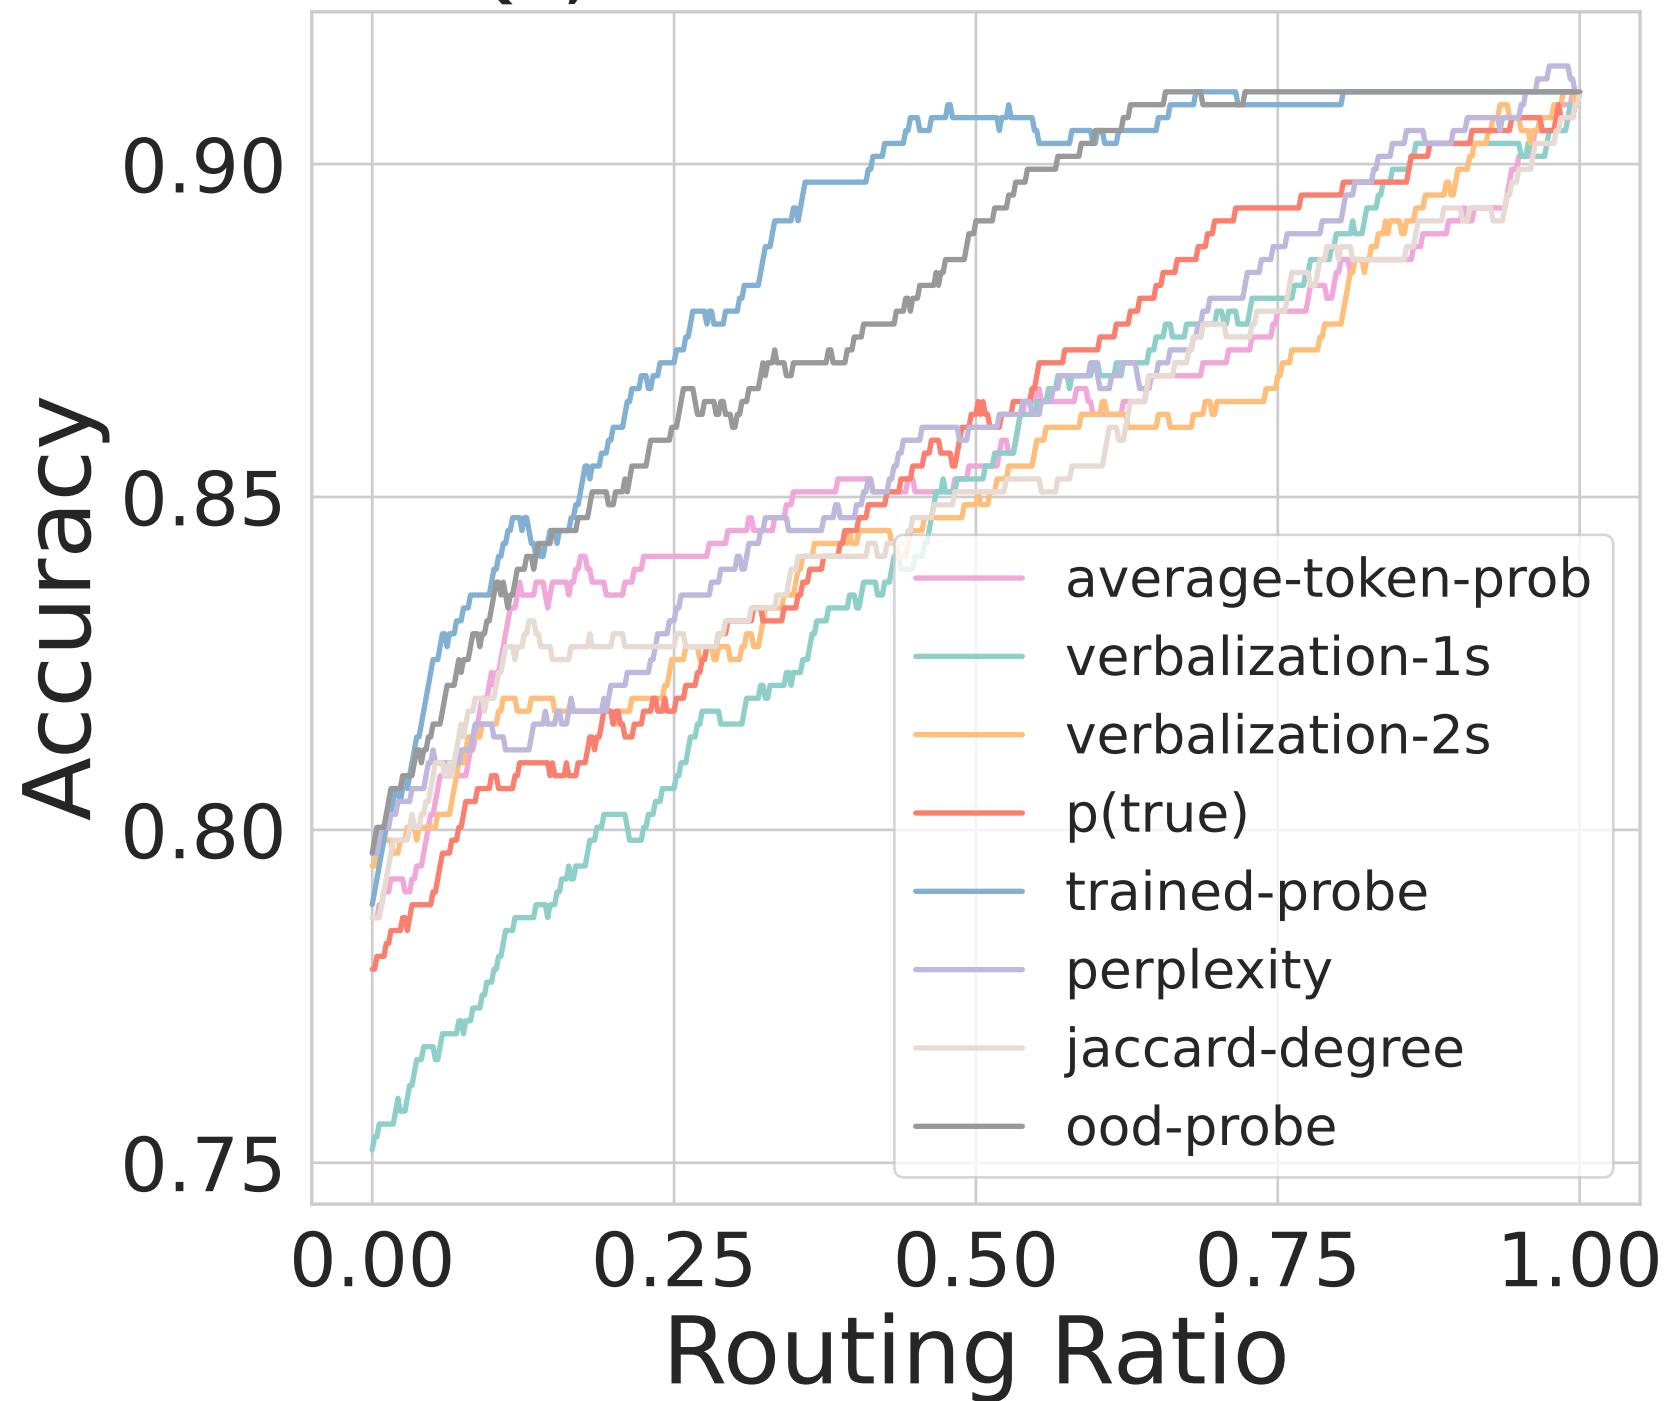

Supplement: supplementary_material [file rr_acc_pi_qa_llama-3.1-8b_gpt41.pdf › Routing_SLM_LLMs/Uncertainty-based Routing/w_legend/to_gpt41/rr_acc_pi_qa_llama-3.1-8b_gpt41.pdf]

## PIQA, llama-3.2-1b to GPT-4.1 mini

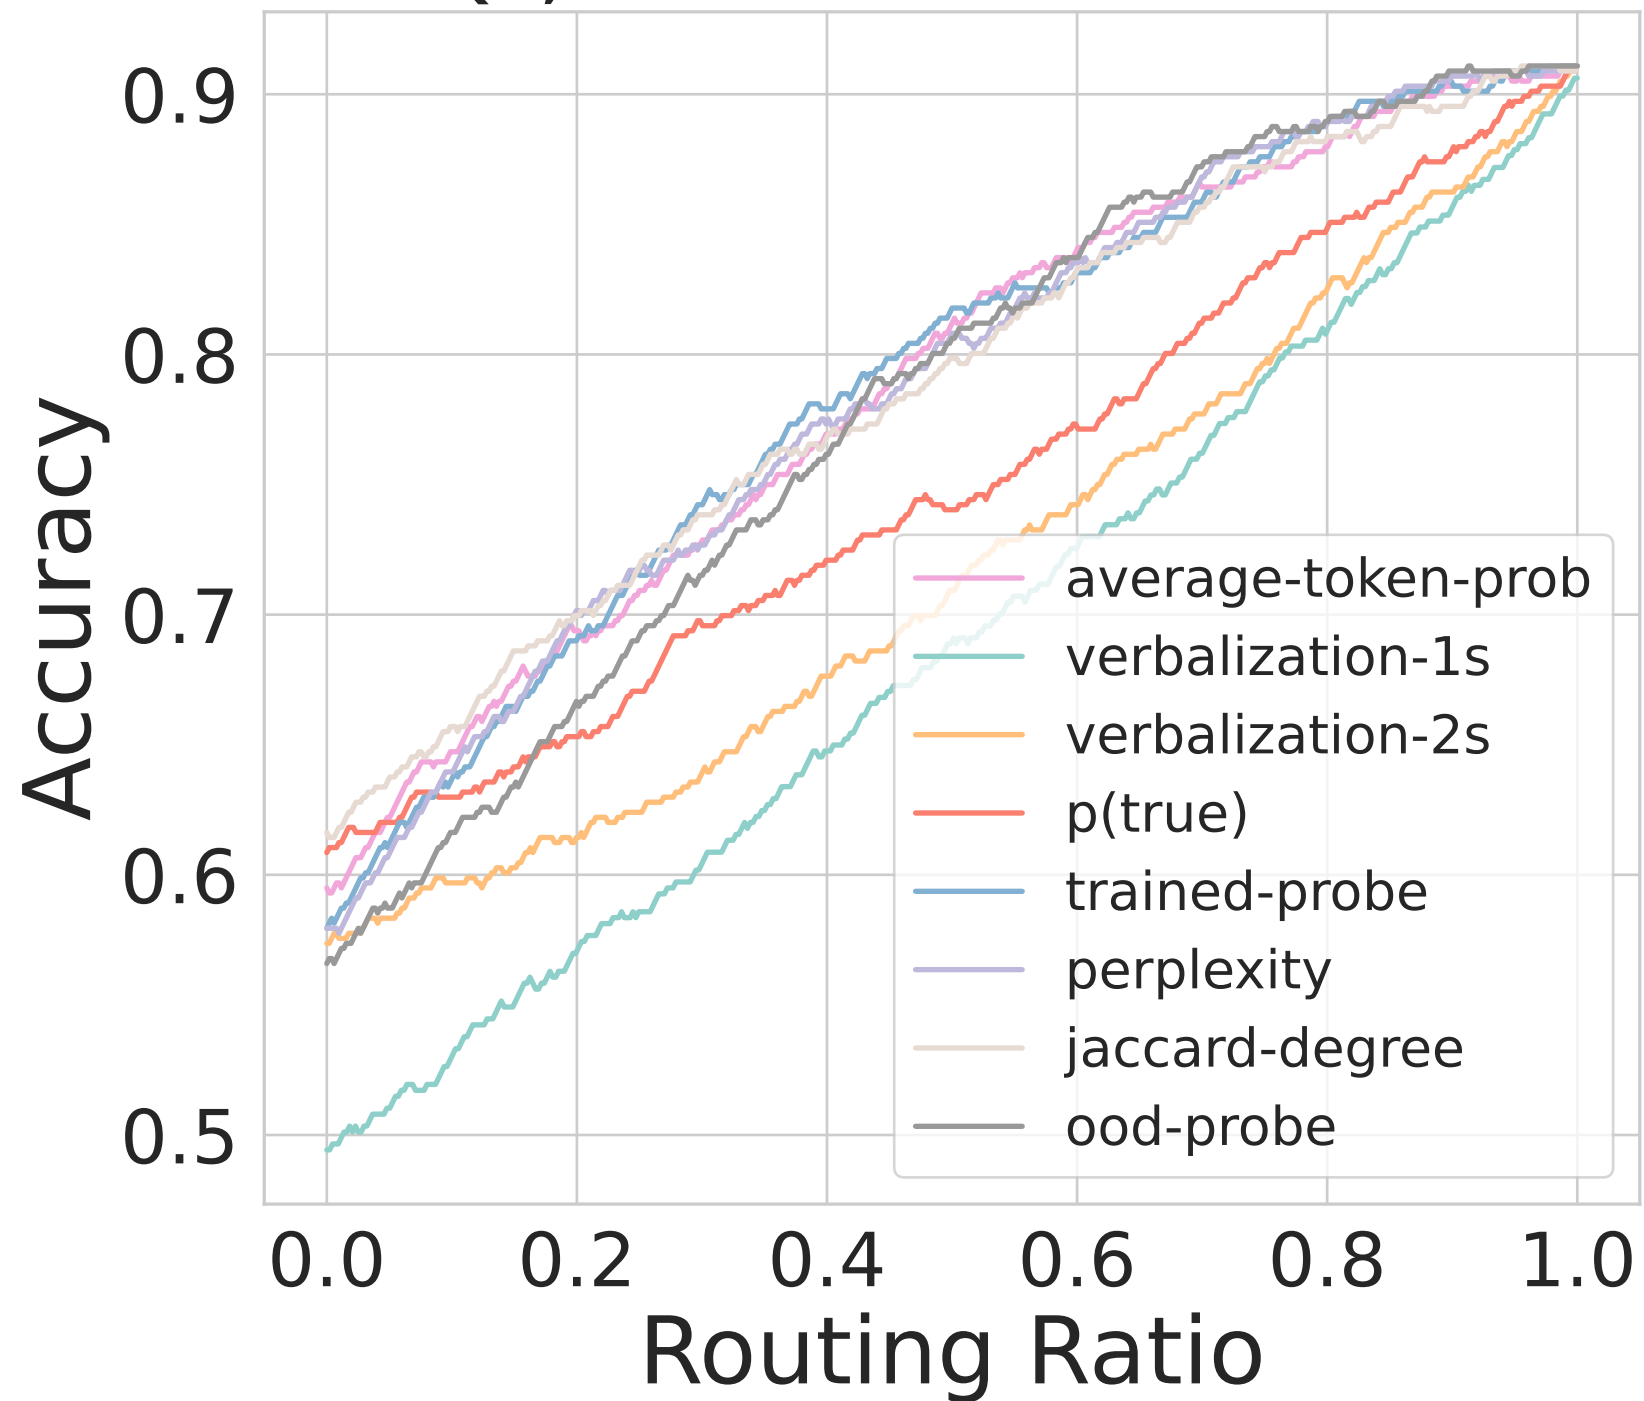

Supplement: supplementary_material [file rr_acc_pi_qa_llama-3.2-1b_gpt41.pdf › Routing_SLM_LLMs/Uncertainty-based Routing/w_legend/to_gpt41/rr_acc_pi_qa_llama-3.2-1b_gpt41.pdf]

## PIQA, llama-3.2-3b to GPT-4.1 mini

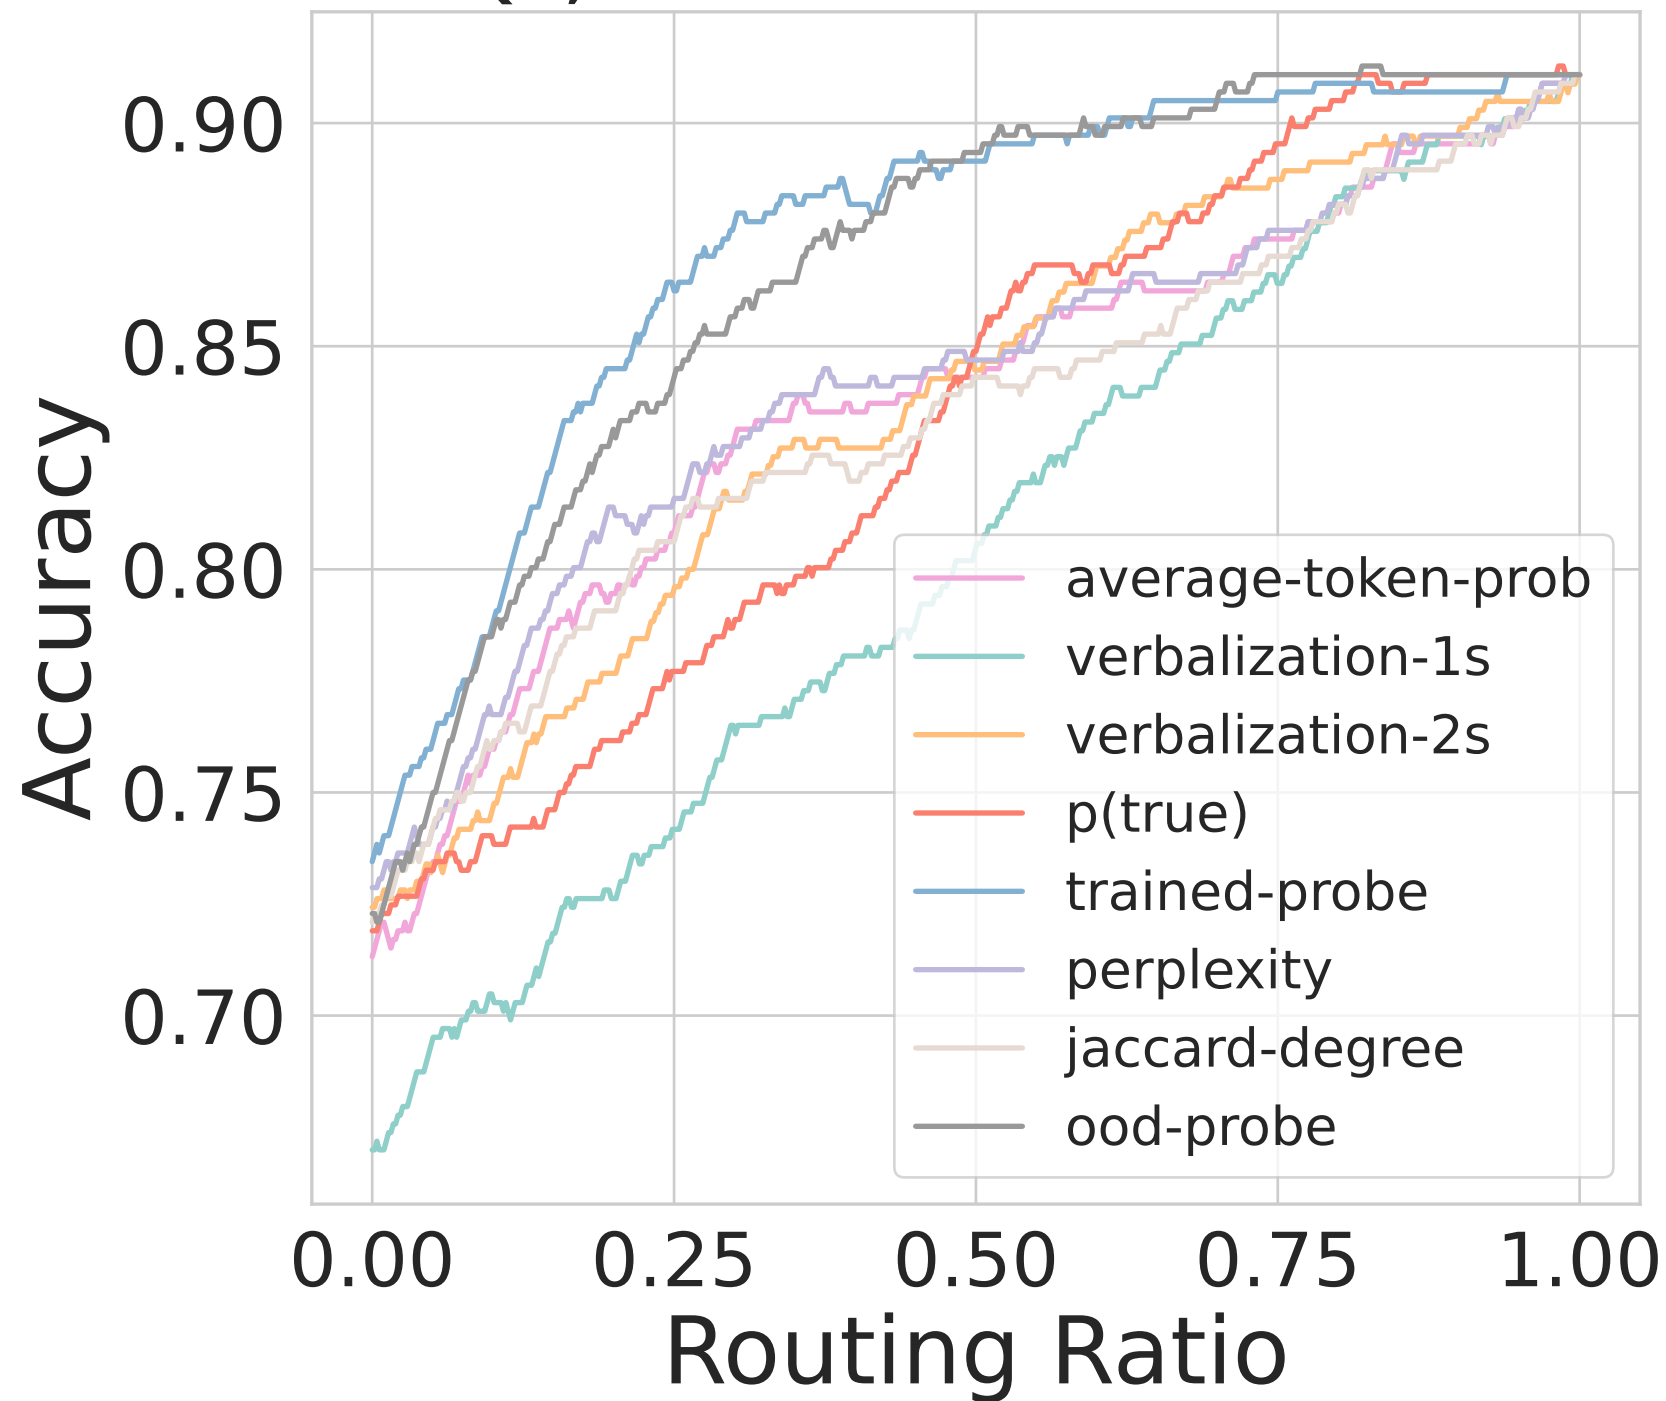

Supplement: supplementary_material [file rr_acc_pi_qa_llama-3.2-3b_gpt41.pdf › Routing_SLM_LLMs/Uncertainty-based Routing/w_legend/to_gpt41/rr_acc_pi_qa_llama-3.2-3b_gpt41.pdf]

**PIQA, mistral-7b to GPT-4.1 mini**

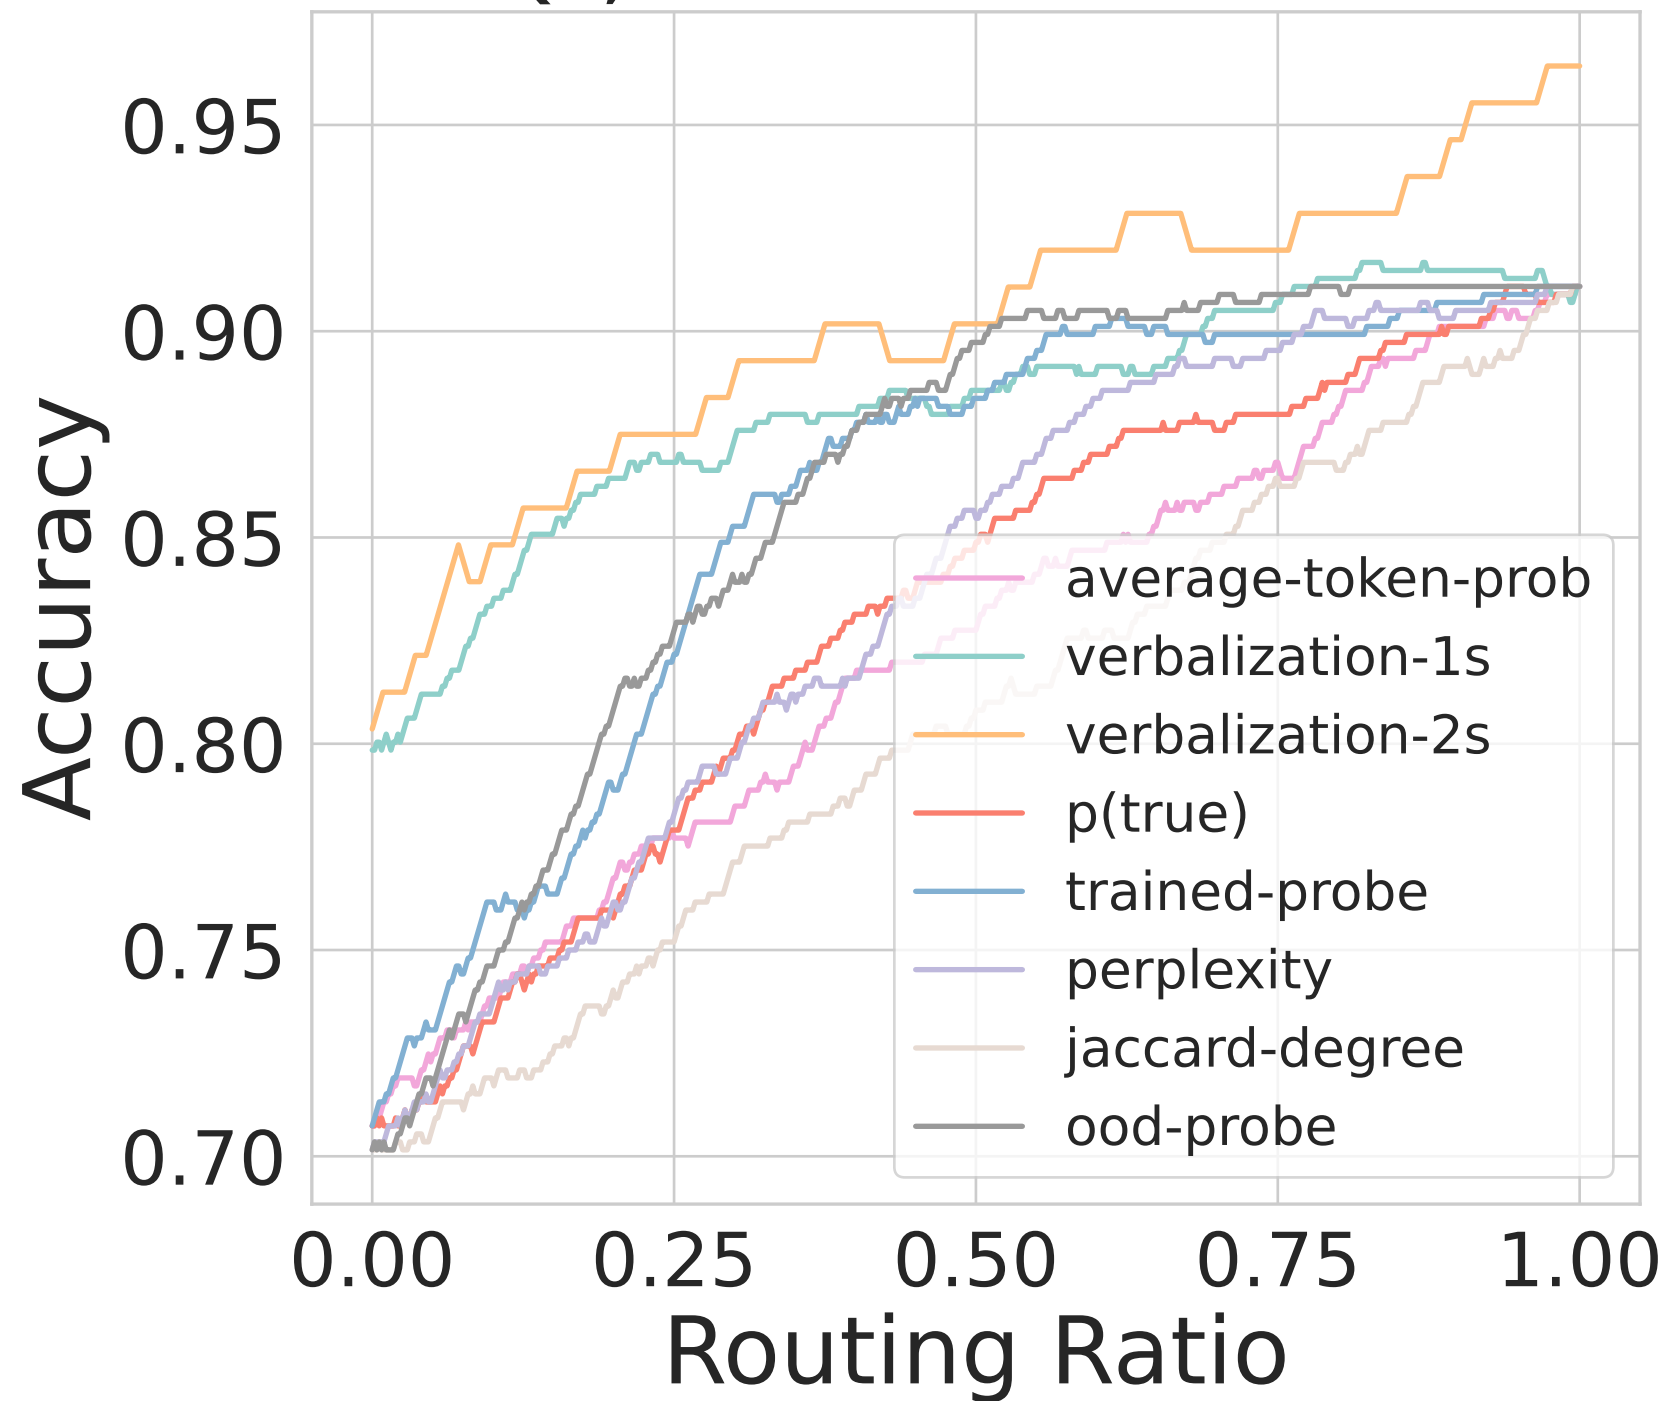

Supplement: supplementary_material [file rr_acc_pi_qa_mistral-7b_gpt41.pdf › Routing_SLM_LLMs/Uncertainty-based Routing/w_legend/to_gpt41/rr_acc_pi_qa_mistral-7b_gpt41.pdf]

**PIQA, phi-3.5-mini to GPT-4.1 mini**

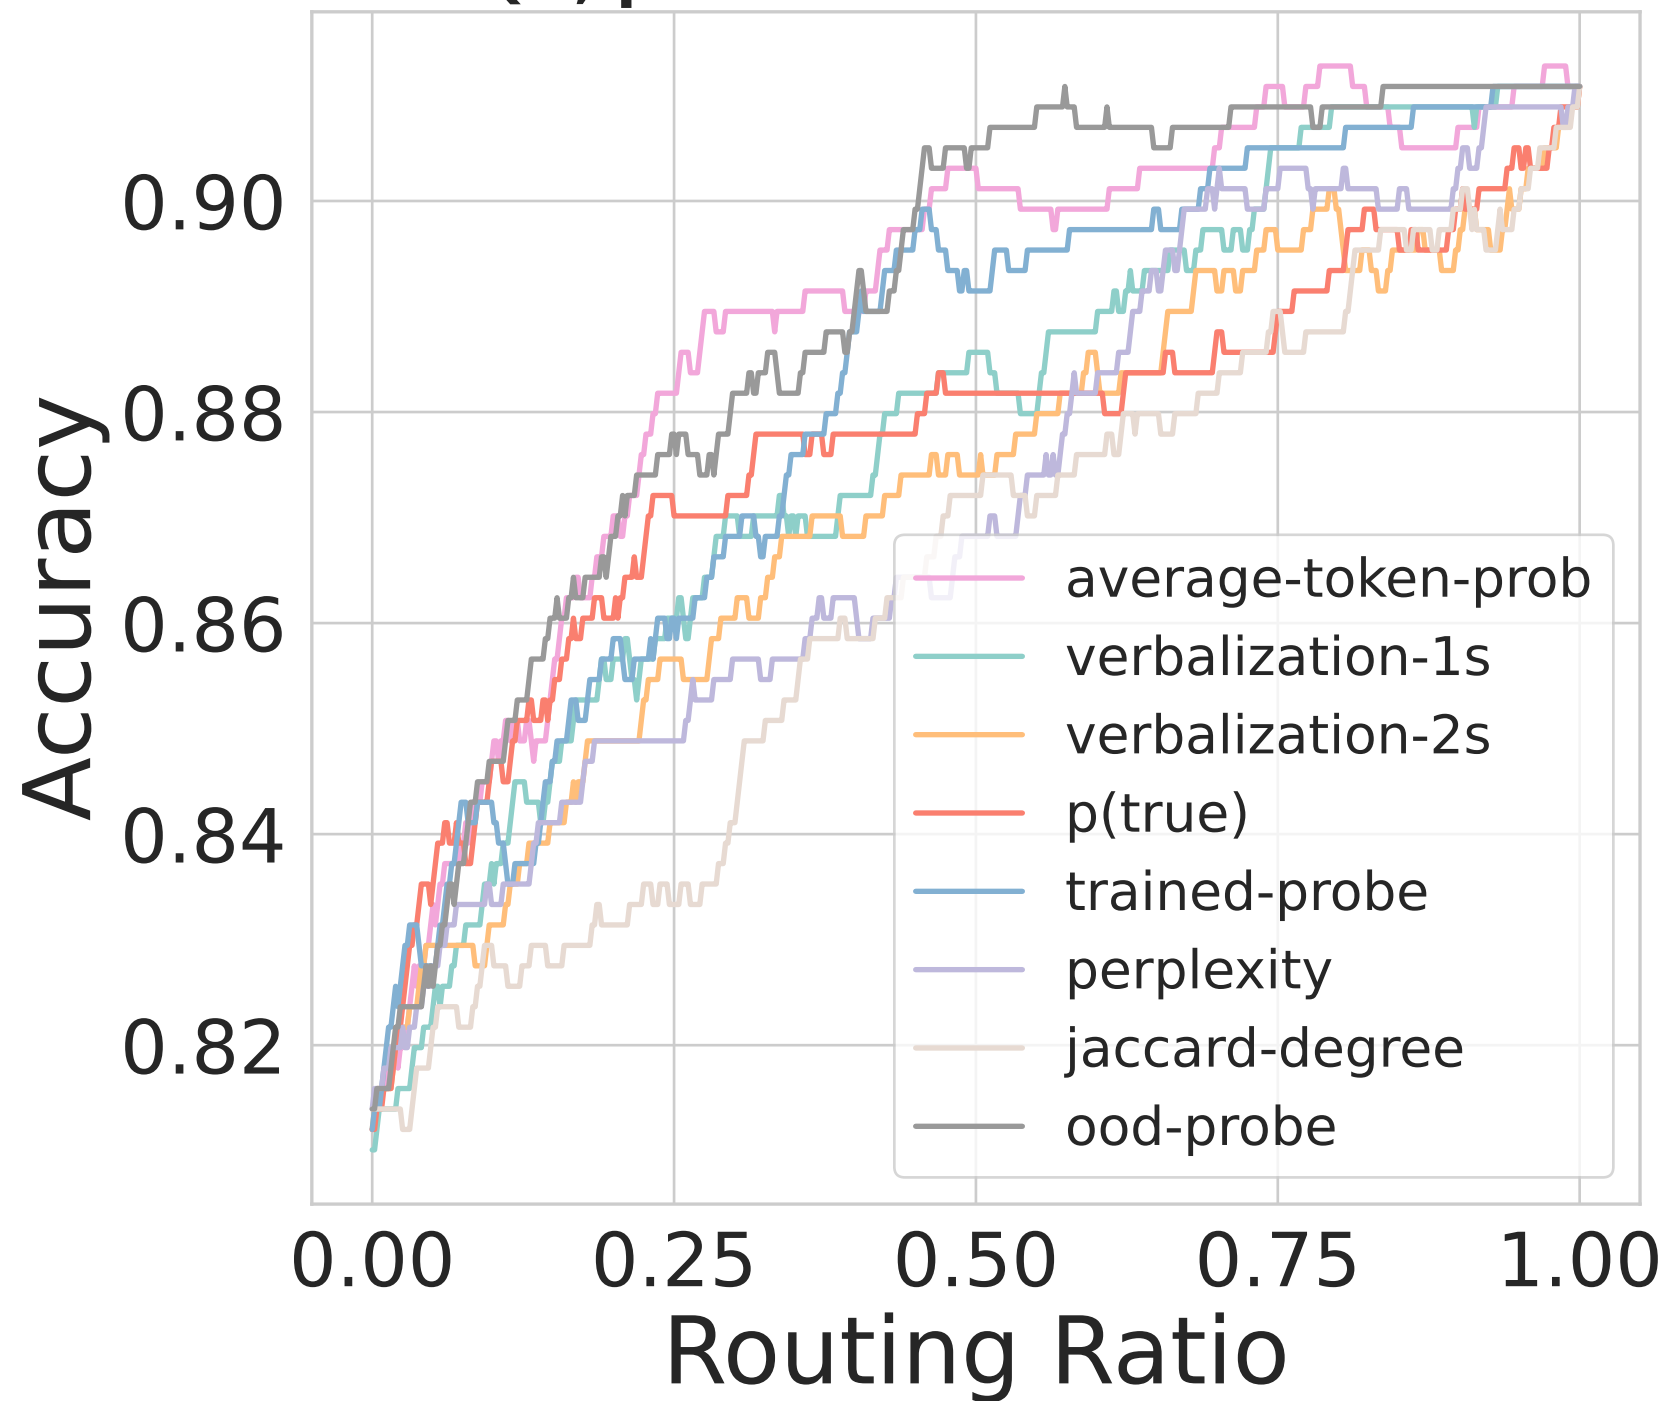

Supplement: supplementary_material [file rr_acc_pi_qa_phi-3.5-mini_gpt41.pdf › Routing_SLM_LLMs/Uncertainty-based Routing/w_legend/to_gpt41/rr_acc_pi_qa_phi-3.5-mini_gpt41.pdf]

## PIQA, phi-4-mini-reasoning to GPT-4.1 mini

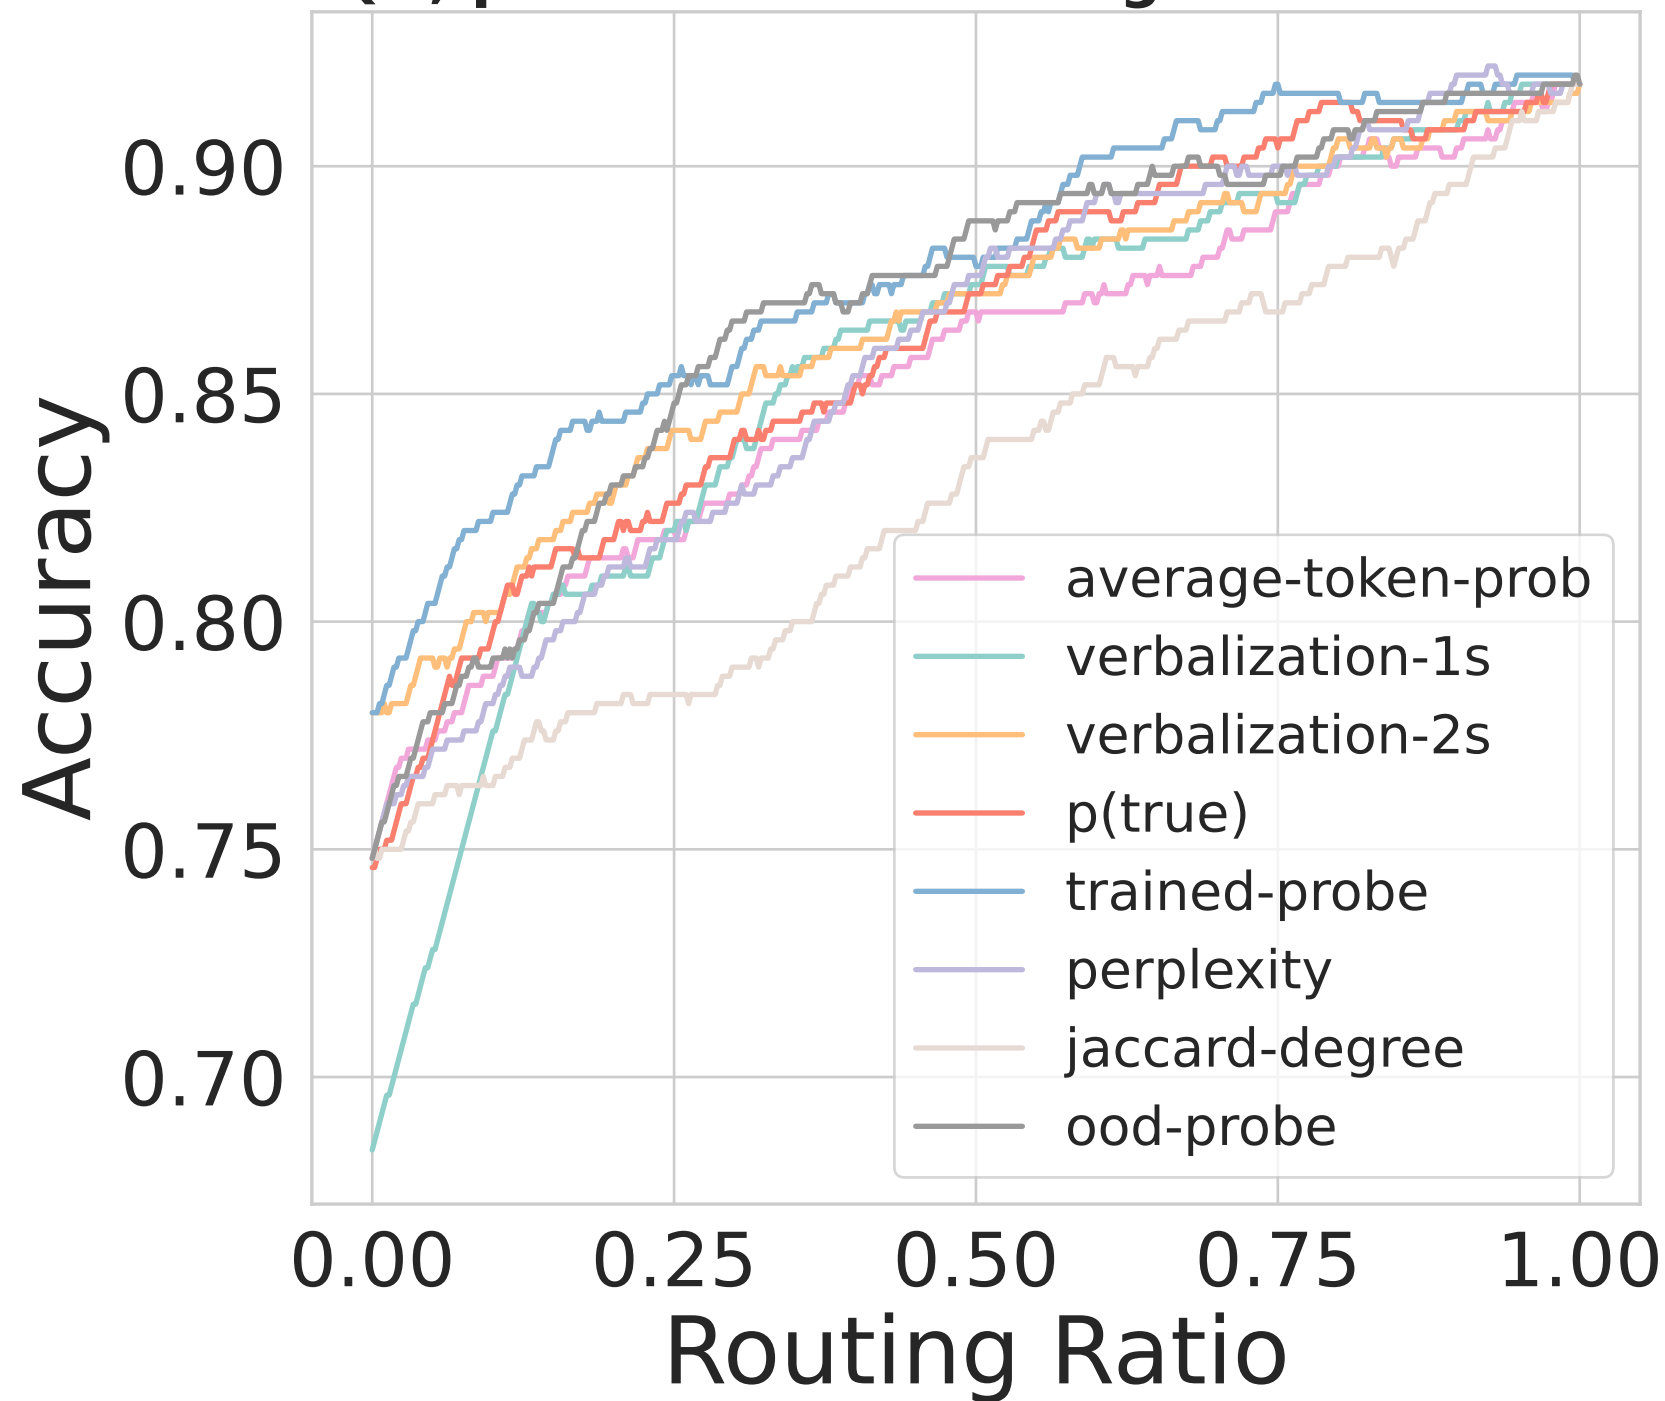

Supplement: supplementary_material [file rr_acc_pi_qa_phi-4-mini-reasoning_gpt41.pdf › Routing_SLM_LLMs/Uncertainty-based Routing/w_legend/to_gpt41/rr_acc_pi_qa_phi-4-mini-reasoning_gpt41.pdf]

## PIQA, gwen-2.5-7b to GPT-4.1 mini

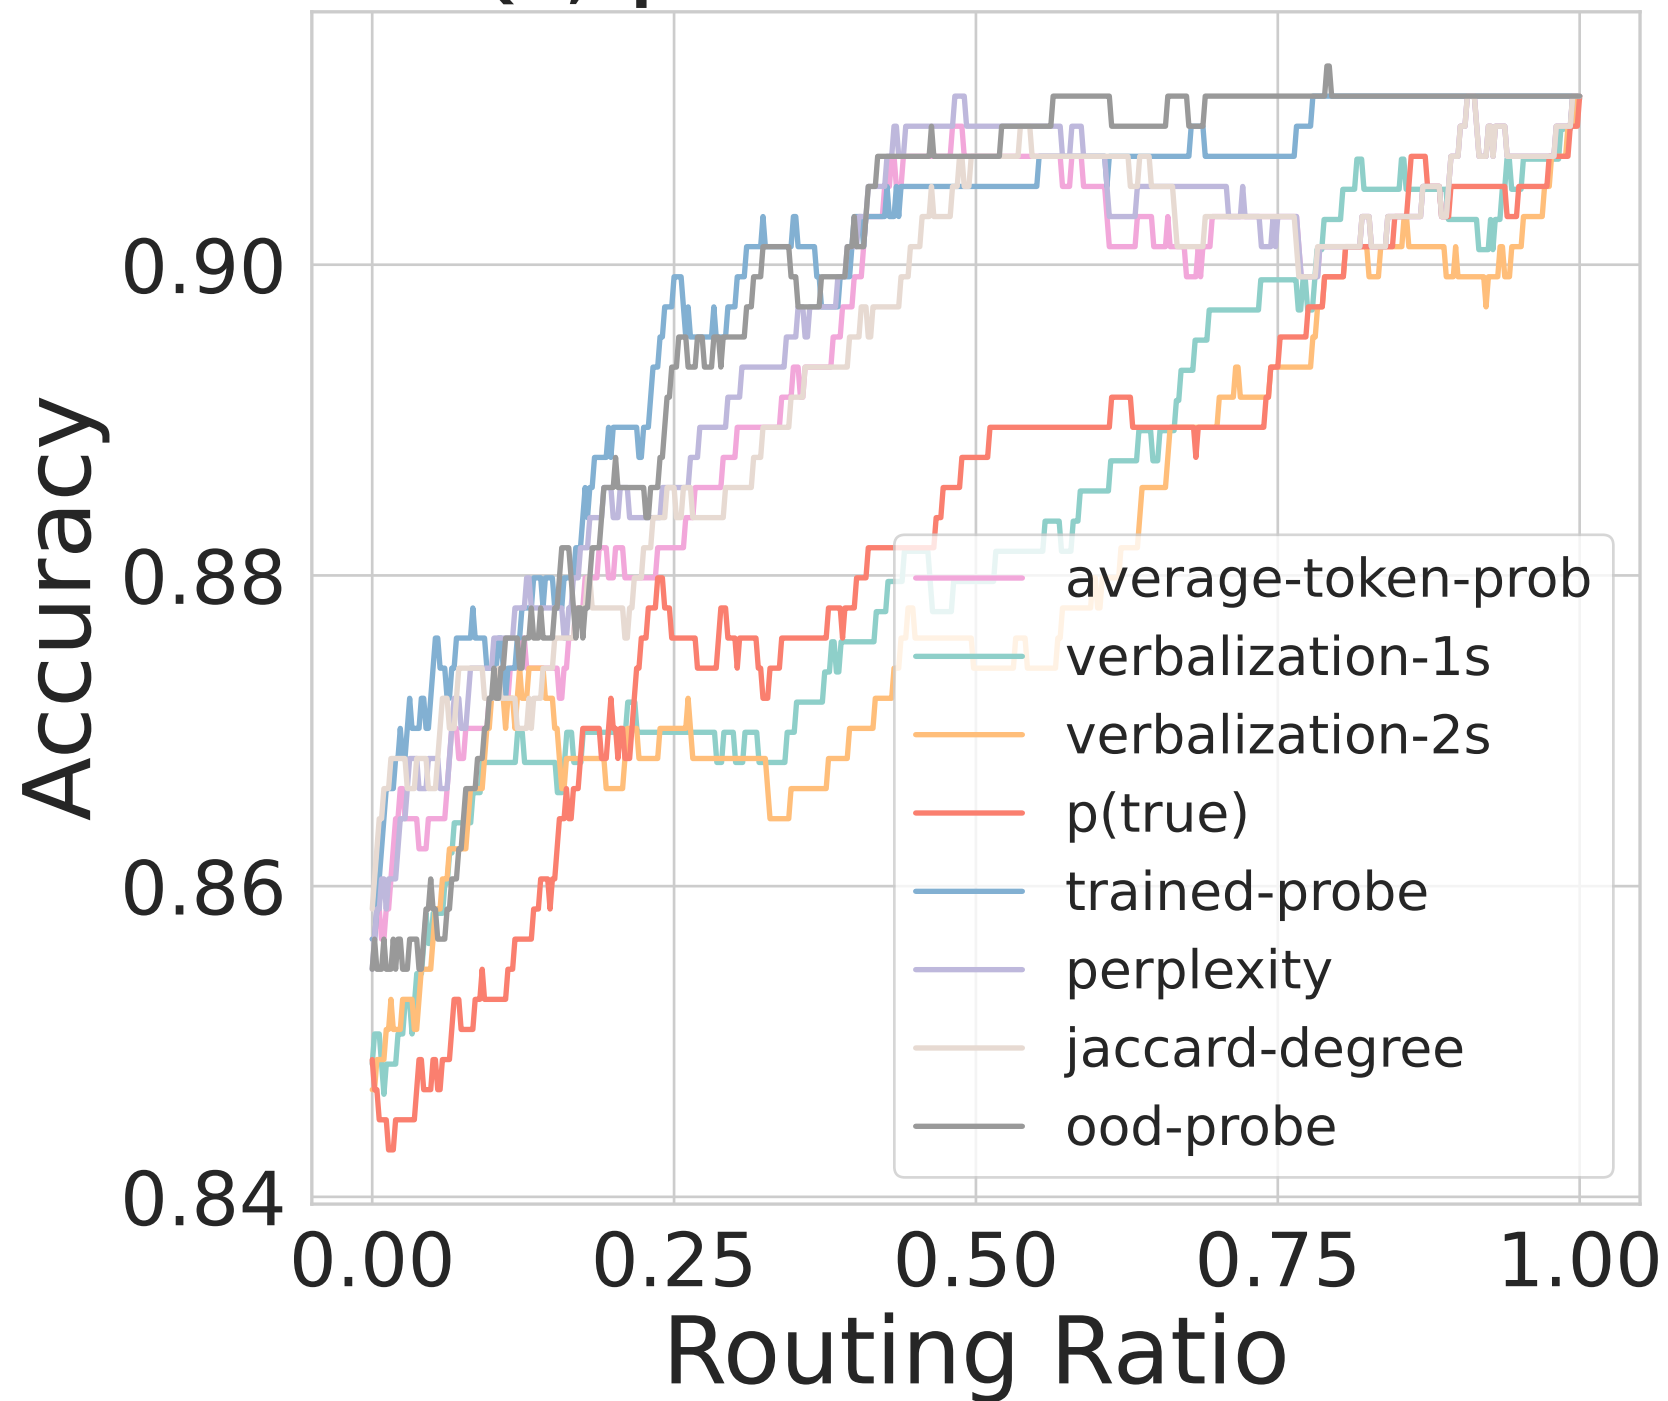

Supplement: supplementary_material [file rr_acc_pi_qa_qwen-2.5-7b_gpt41.pdf › Routing_SLM_LLMs/Uncertainty-based Routing/w_legend/to_gpt41/rr_acc_pi_qa_qwen-2.5-7b_gpt41.pdf]

# PIQA, rwkv to GPT-4.1 mini

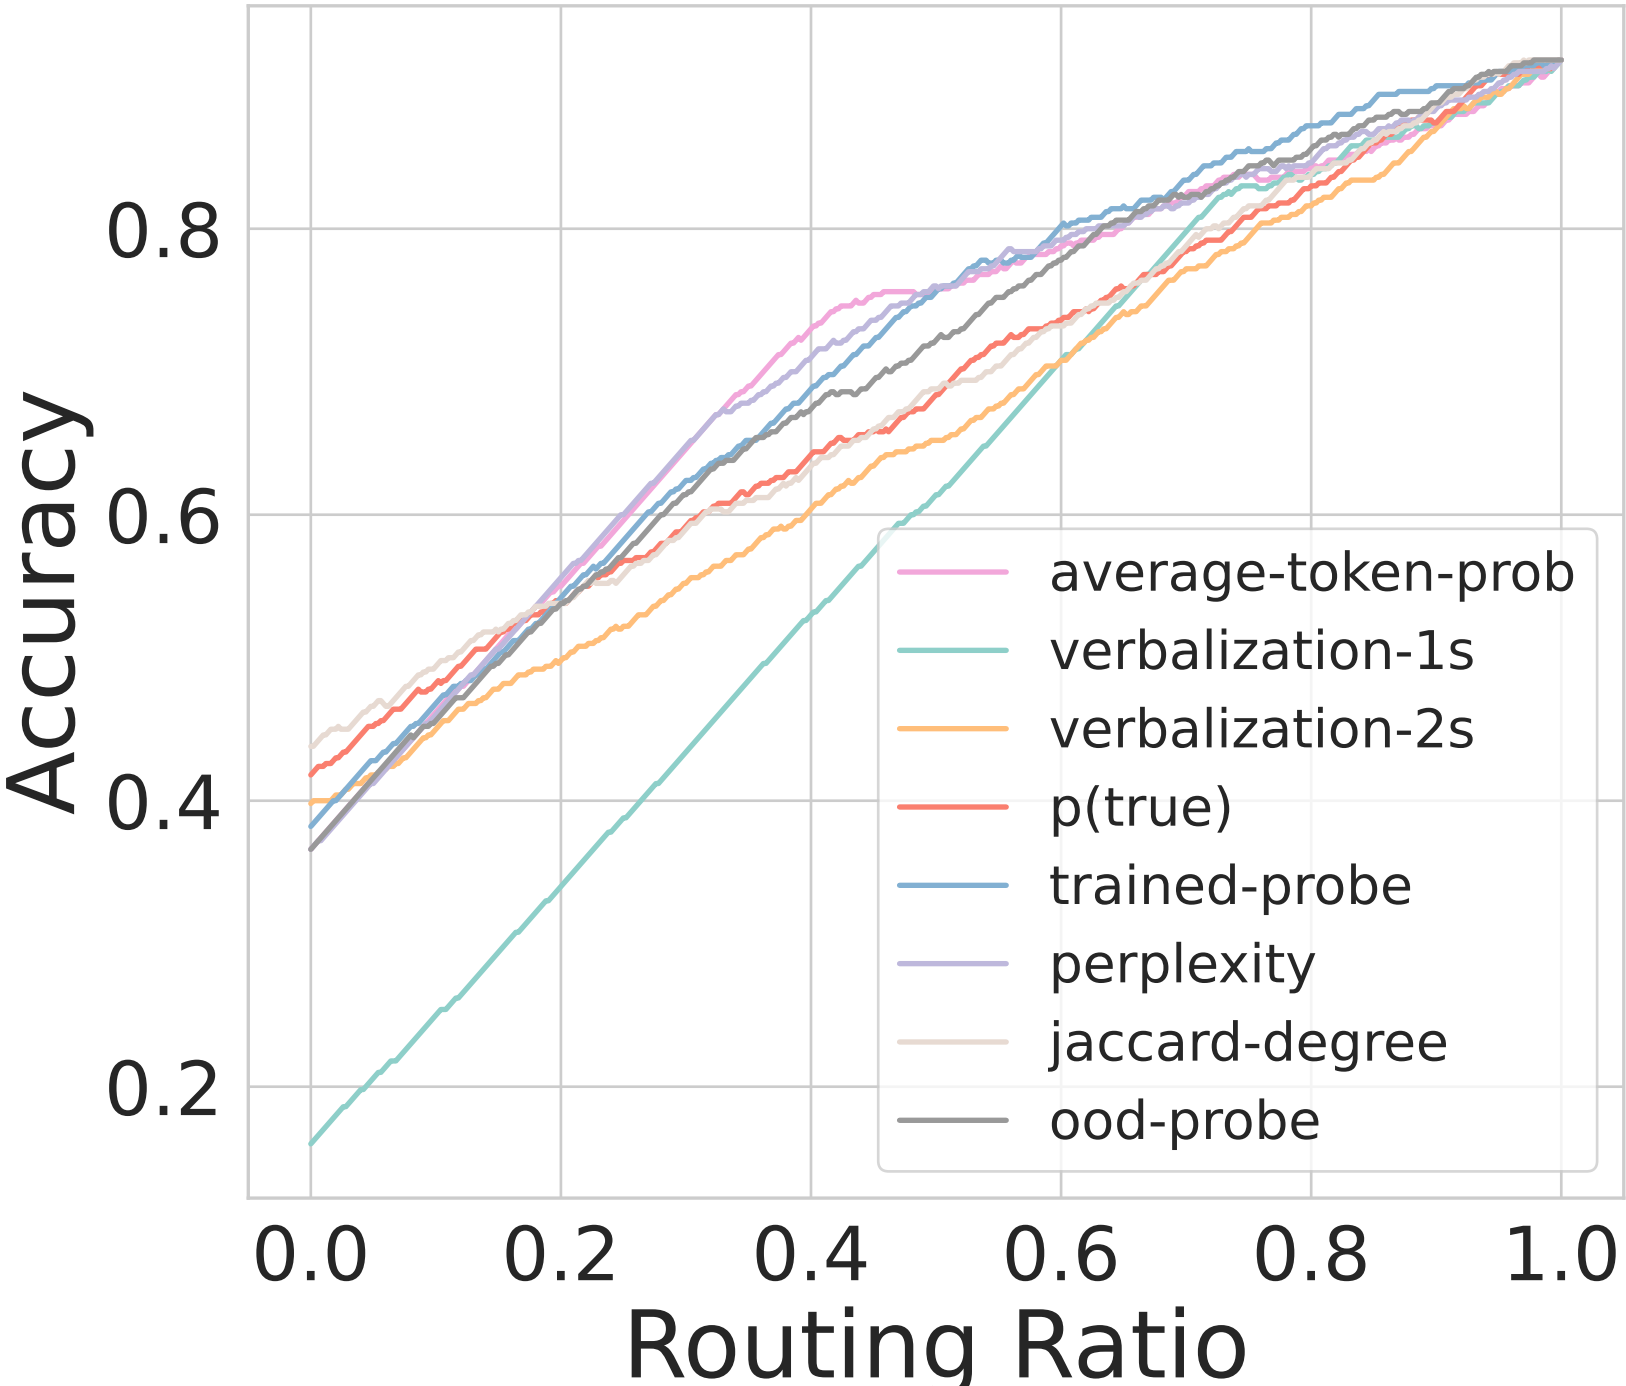

Supplement: supplementary_material [file rr_acc_pi_qa_rwkv_gpt41.pdf › Routing_SLM_LLMs/Uncertainty-based Routing/w_legend/to_gpt41/rr_acc_pi_qa_rwkv_gpt41.pdf]

## Social IQa, Qwen3-0.6B to GPT-4.1 mini

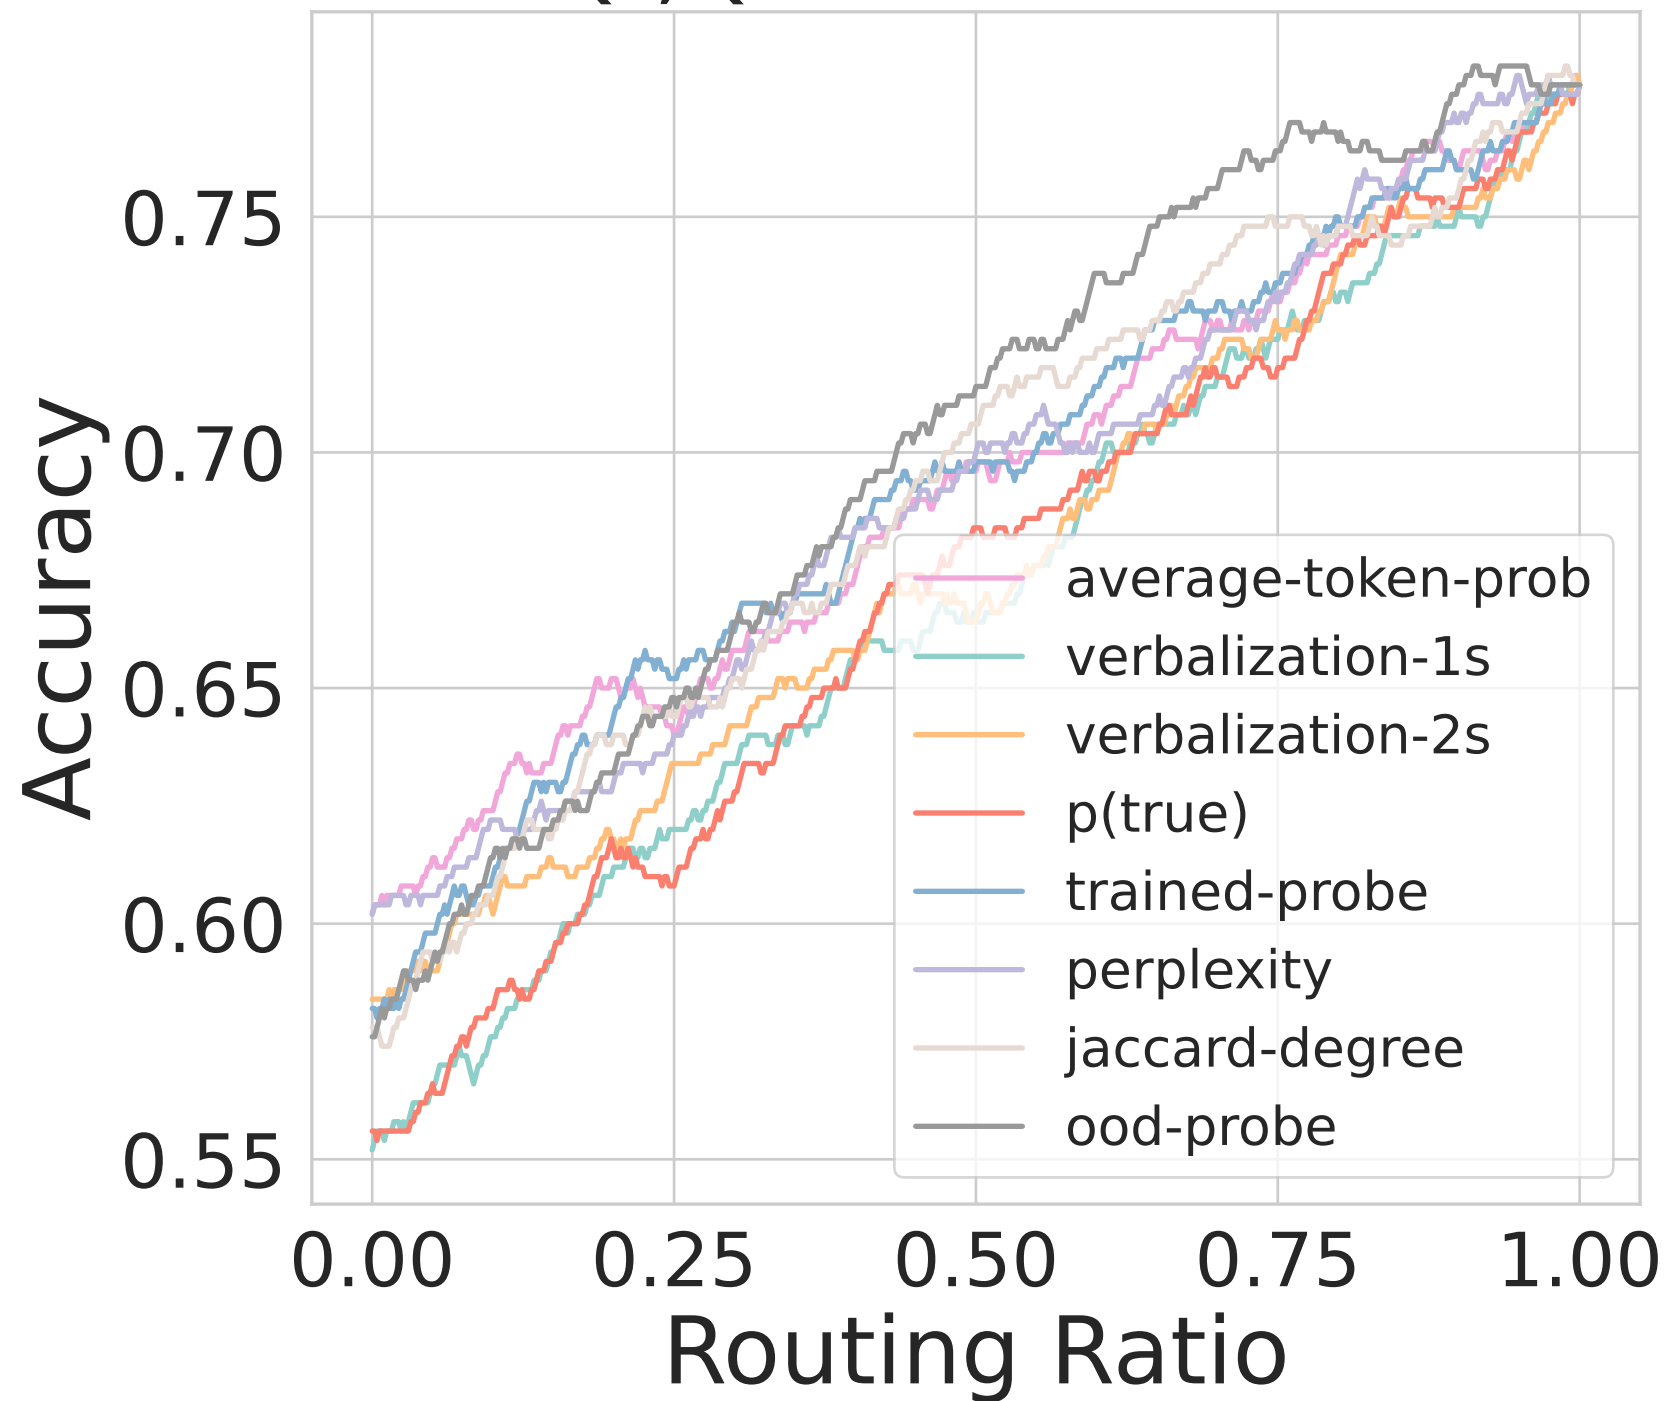

Supplement: supplementary_material [file rr_acc_social_i_qa_Qwen3-0.6B_gpt41.pdf › Routing_SLM_LLMs/Uncertainty-based Routing/w_legend/to_gpt41/rr_acc_social_i_qa_Qwen3-0.6B_gpt41.pdf]

## Social IQa, Qwen3-1.7B to GPT-4.1 mini

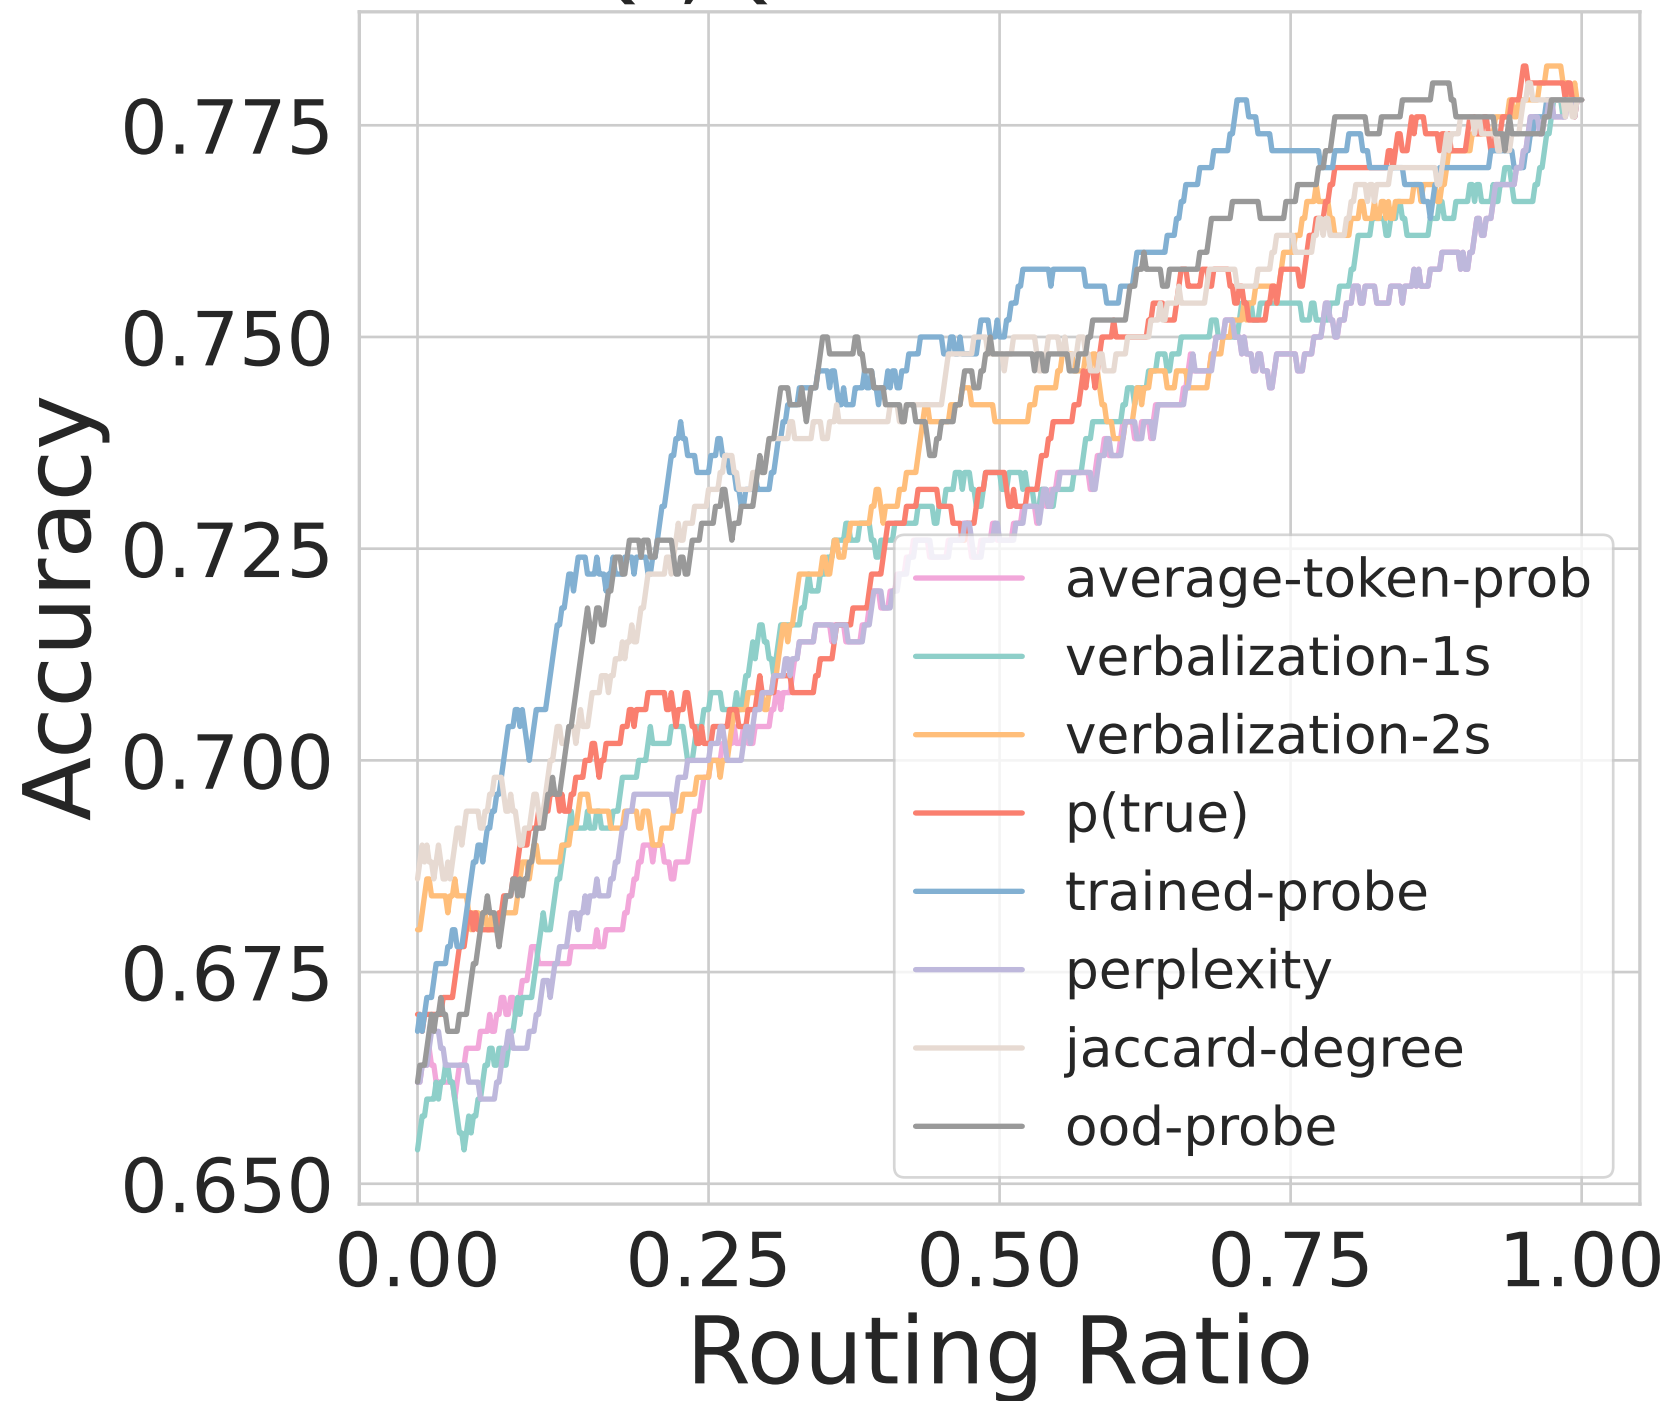

Supplement: supplementary_material [file rr_acc_social_i_qa_Qwen3-1.7B_gpt41.pdf › Routing_SLM_LLMs/Uncertainty-based Routing/w_legend/to_gpt41/rr_acc_social_i_qa_Qwen3-1.7B_gpt41.pdf]

# Social IQa, granite-3.1-8b to GPT-4.1 mini

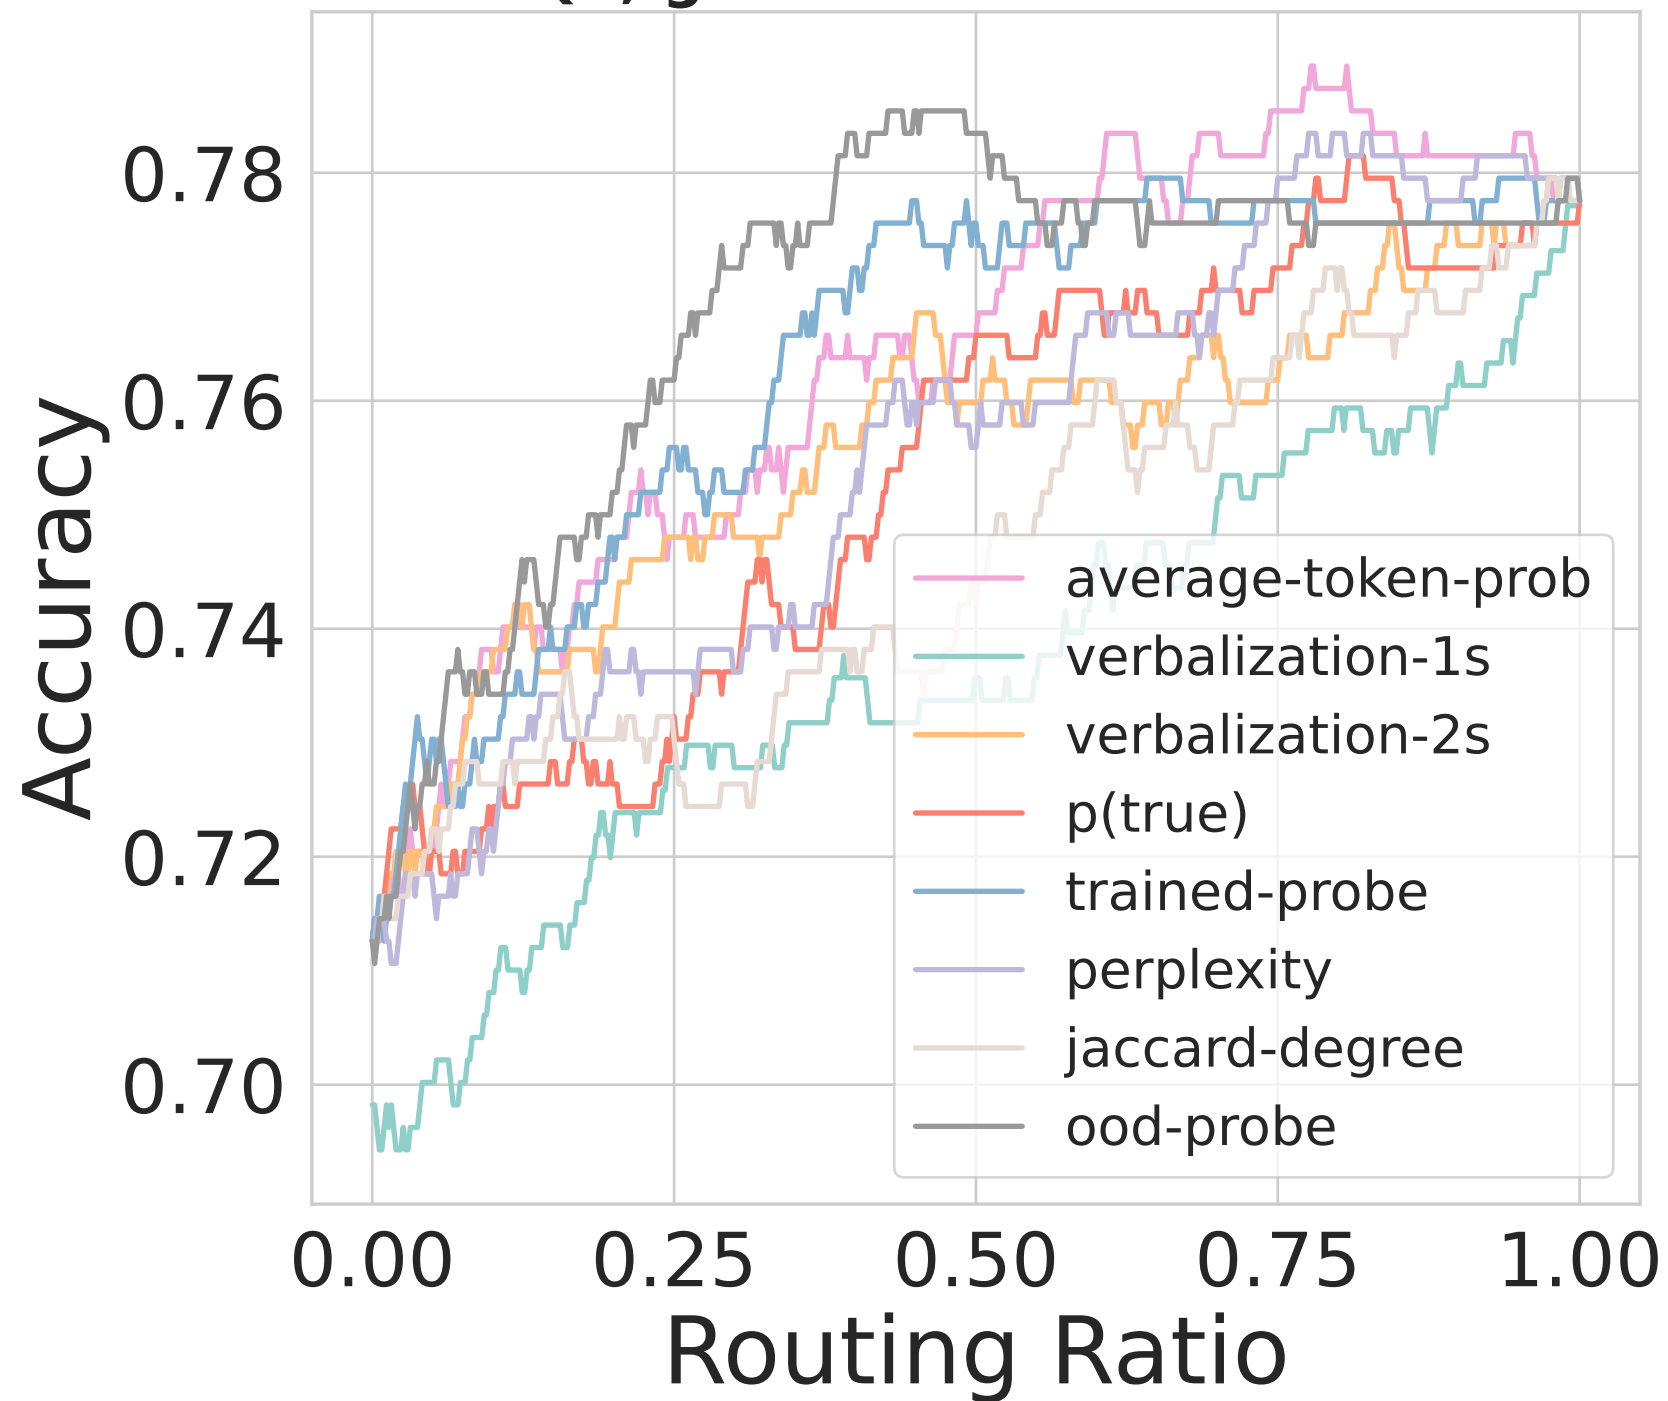

Supplement: supplementary_material [file rr_acc_social_i_qa_granite-3.1-8b_gpt41.pdf › Routing_SLM_LLMs/Uncertainty-based Routing/w_legend/to_gpt41/rr_acc_social_i_qa_granite-3.1-8b_gpt41.pdf]

**Social IQa, llama-3.2-1b to GPT-4.1 mini**

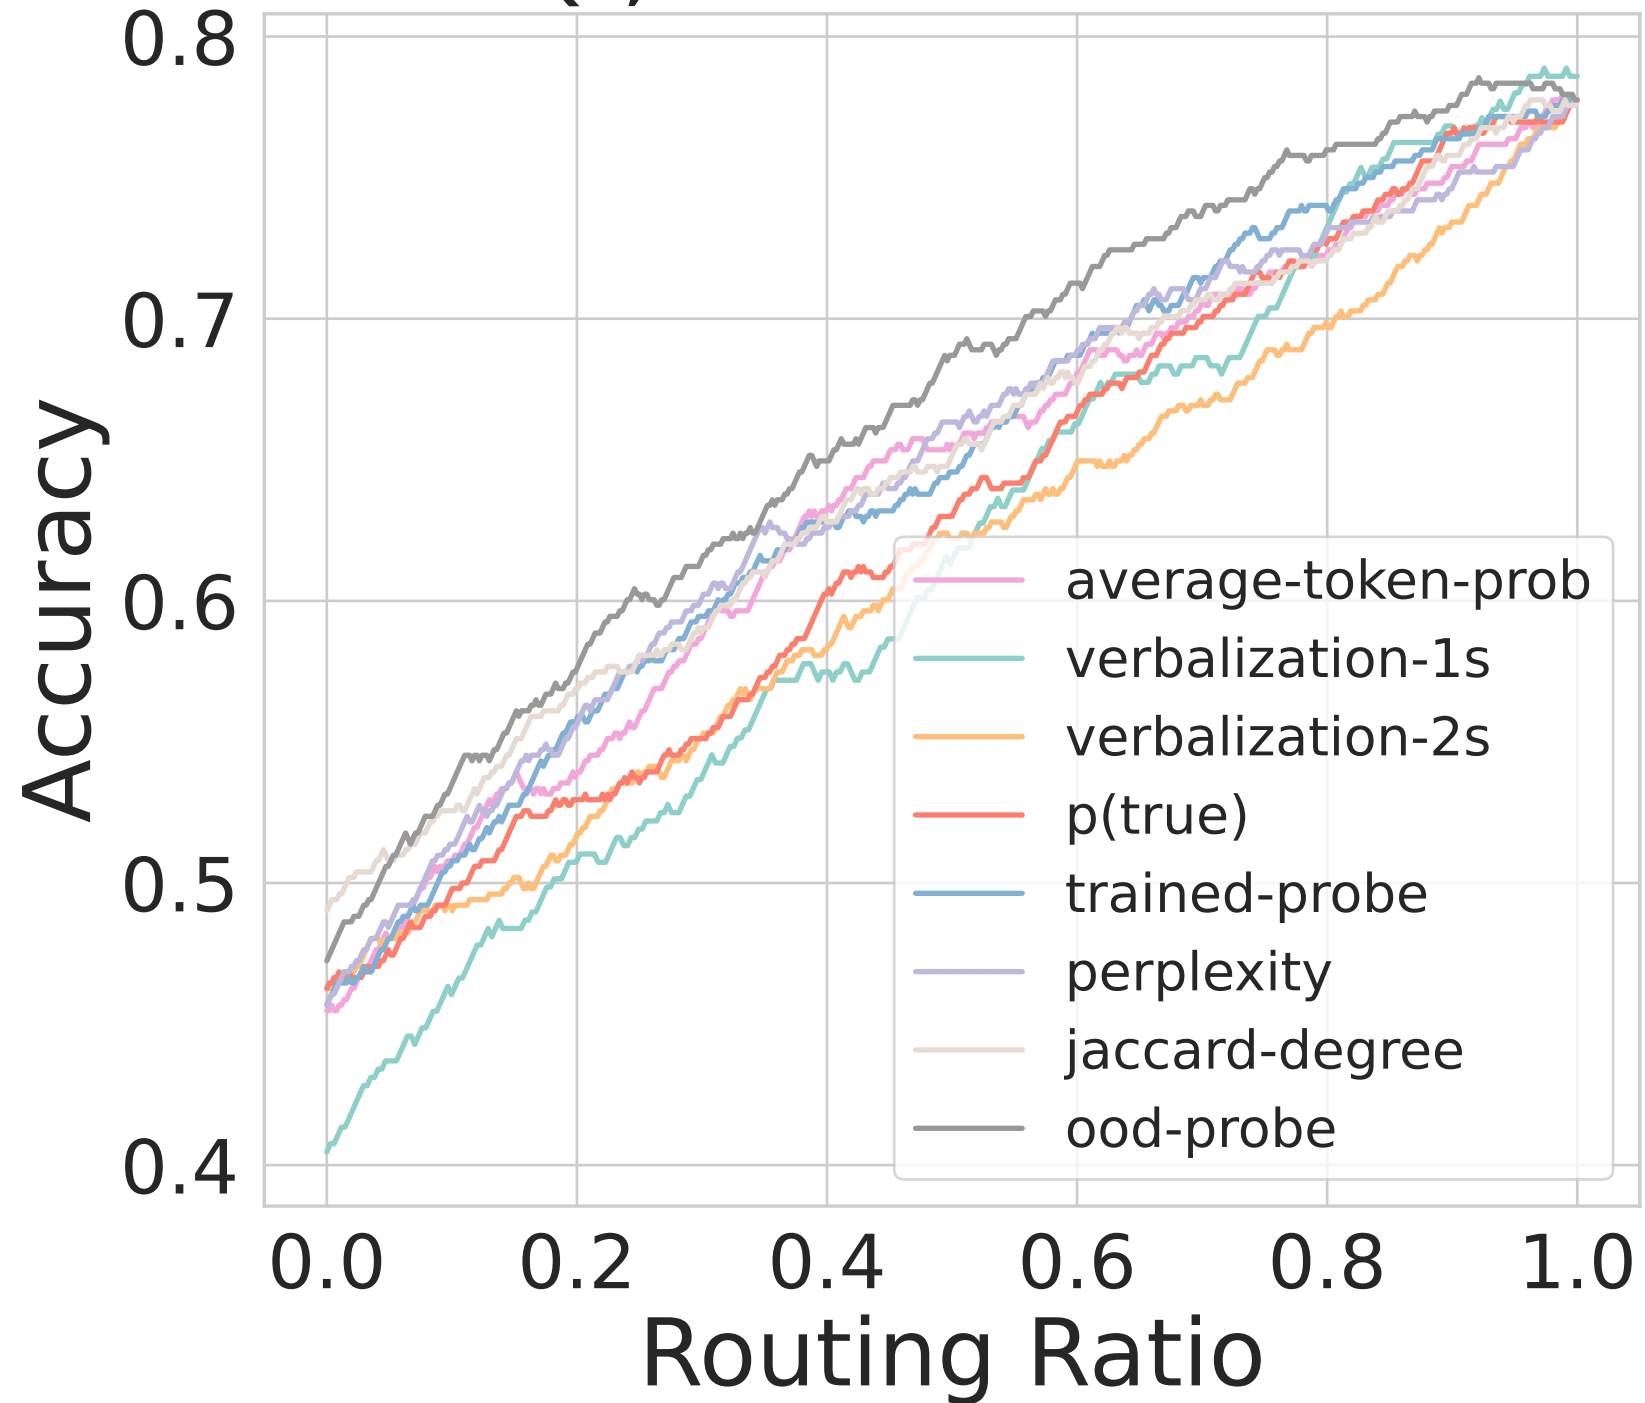

Supplement: supplementary_material [file rr_acc_social_i_qa_llama-3.2-1b_gpt41.pdf › Routing_SLM_LLMs/Uncertainty-based Routing/w_legend/to_gpt41/rr_acc_social_i_qa_llama-3.2-1b_gpt41.pdf]

# Social IQa, llama-3.2-3b to GPT-4.1 mini

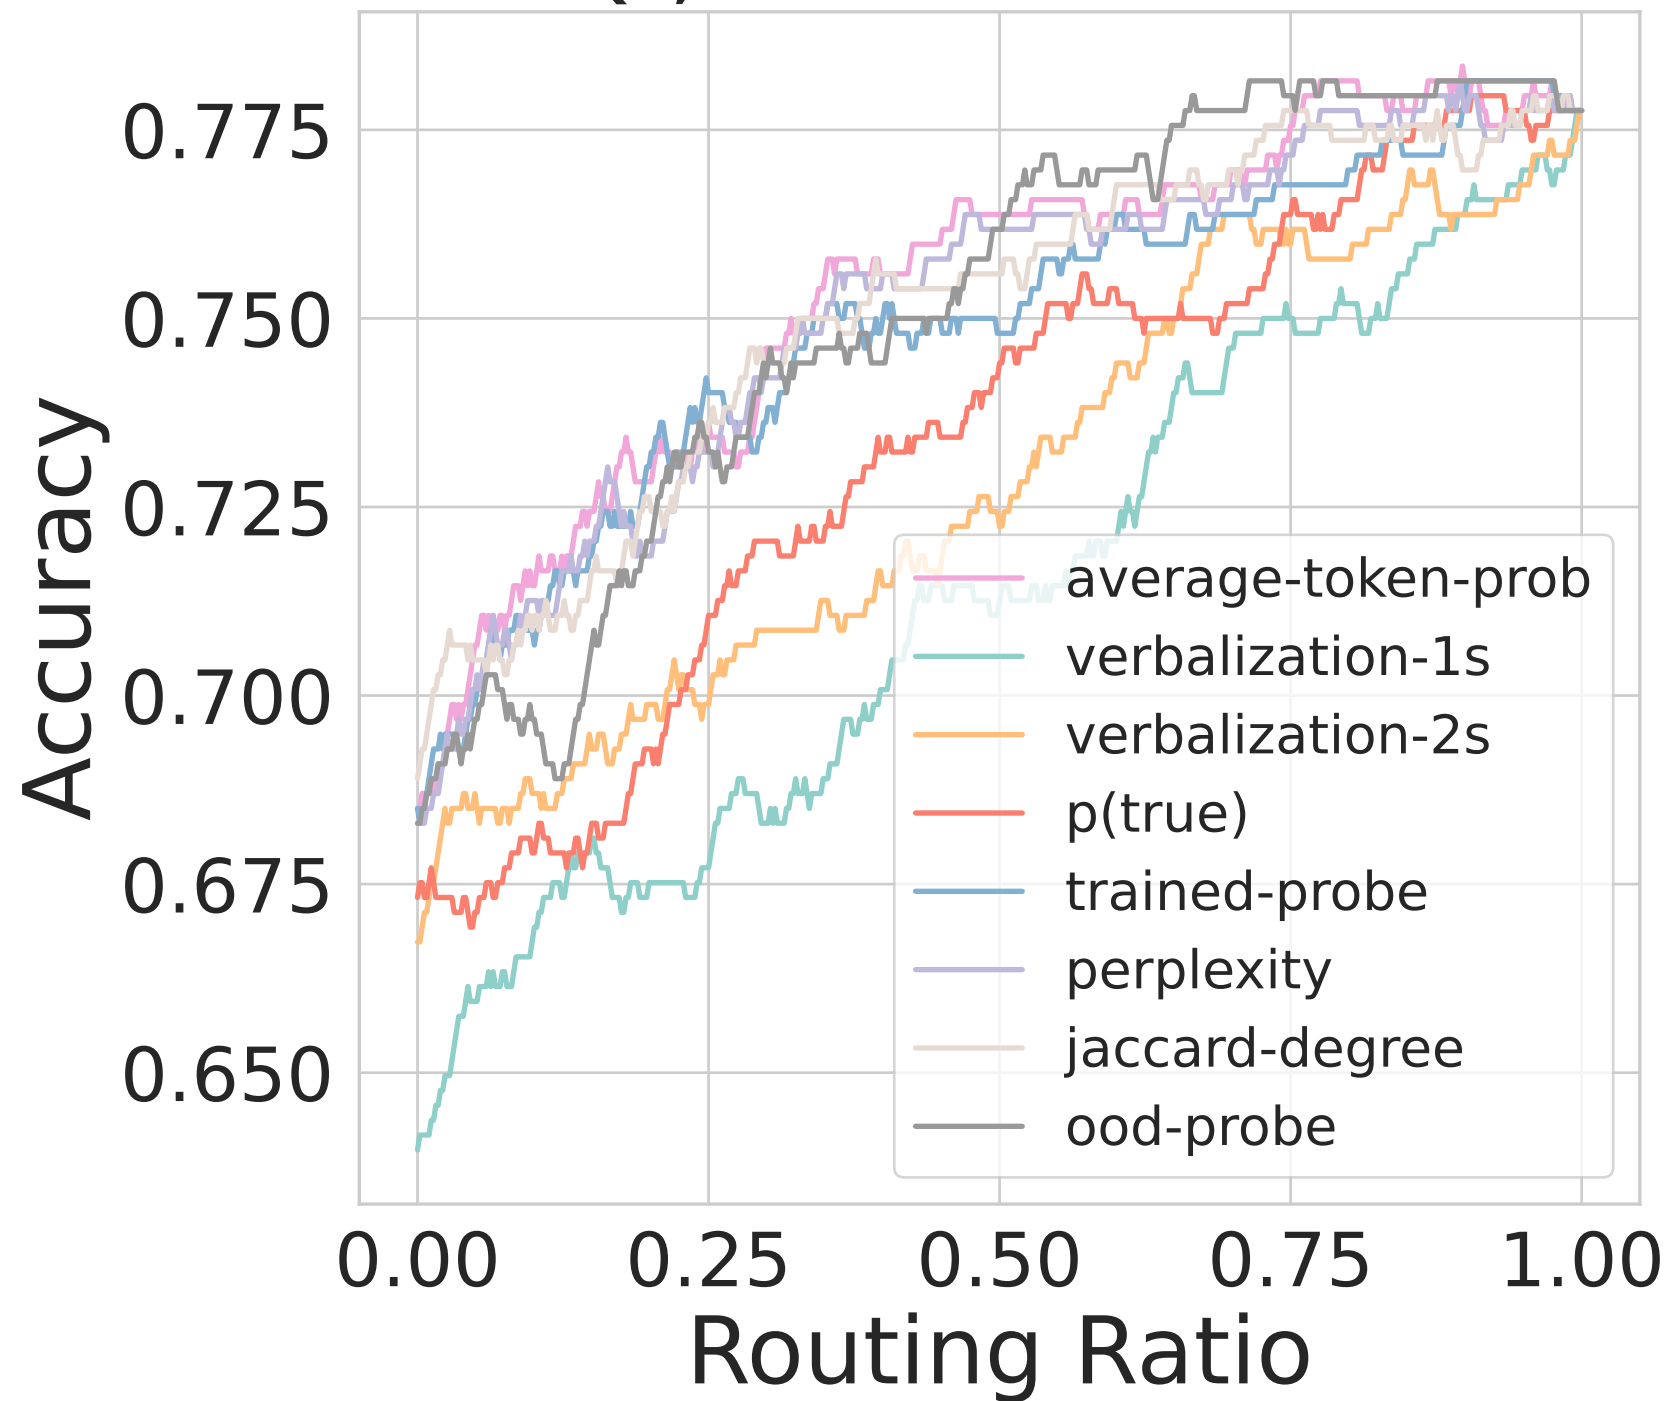

Supplement: supplementary_material [file rr_acc_social_i_qa_llama-3.2-3b_gpt41.pdf › Routing_SLM_LLMs/Uncertainty-based Routing/w_legend/to_gpt41/rr_acc_social_i_qa_llama-3.2-3b_gpt41.pdf]

**Social IQa, mistral-7b to GPT-4.1 mini**

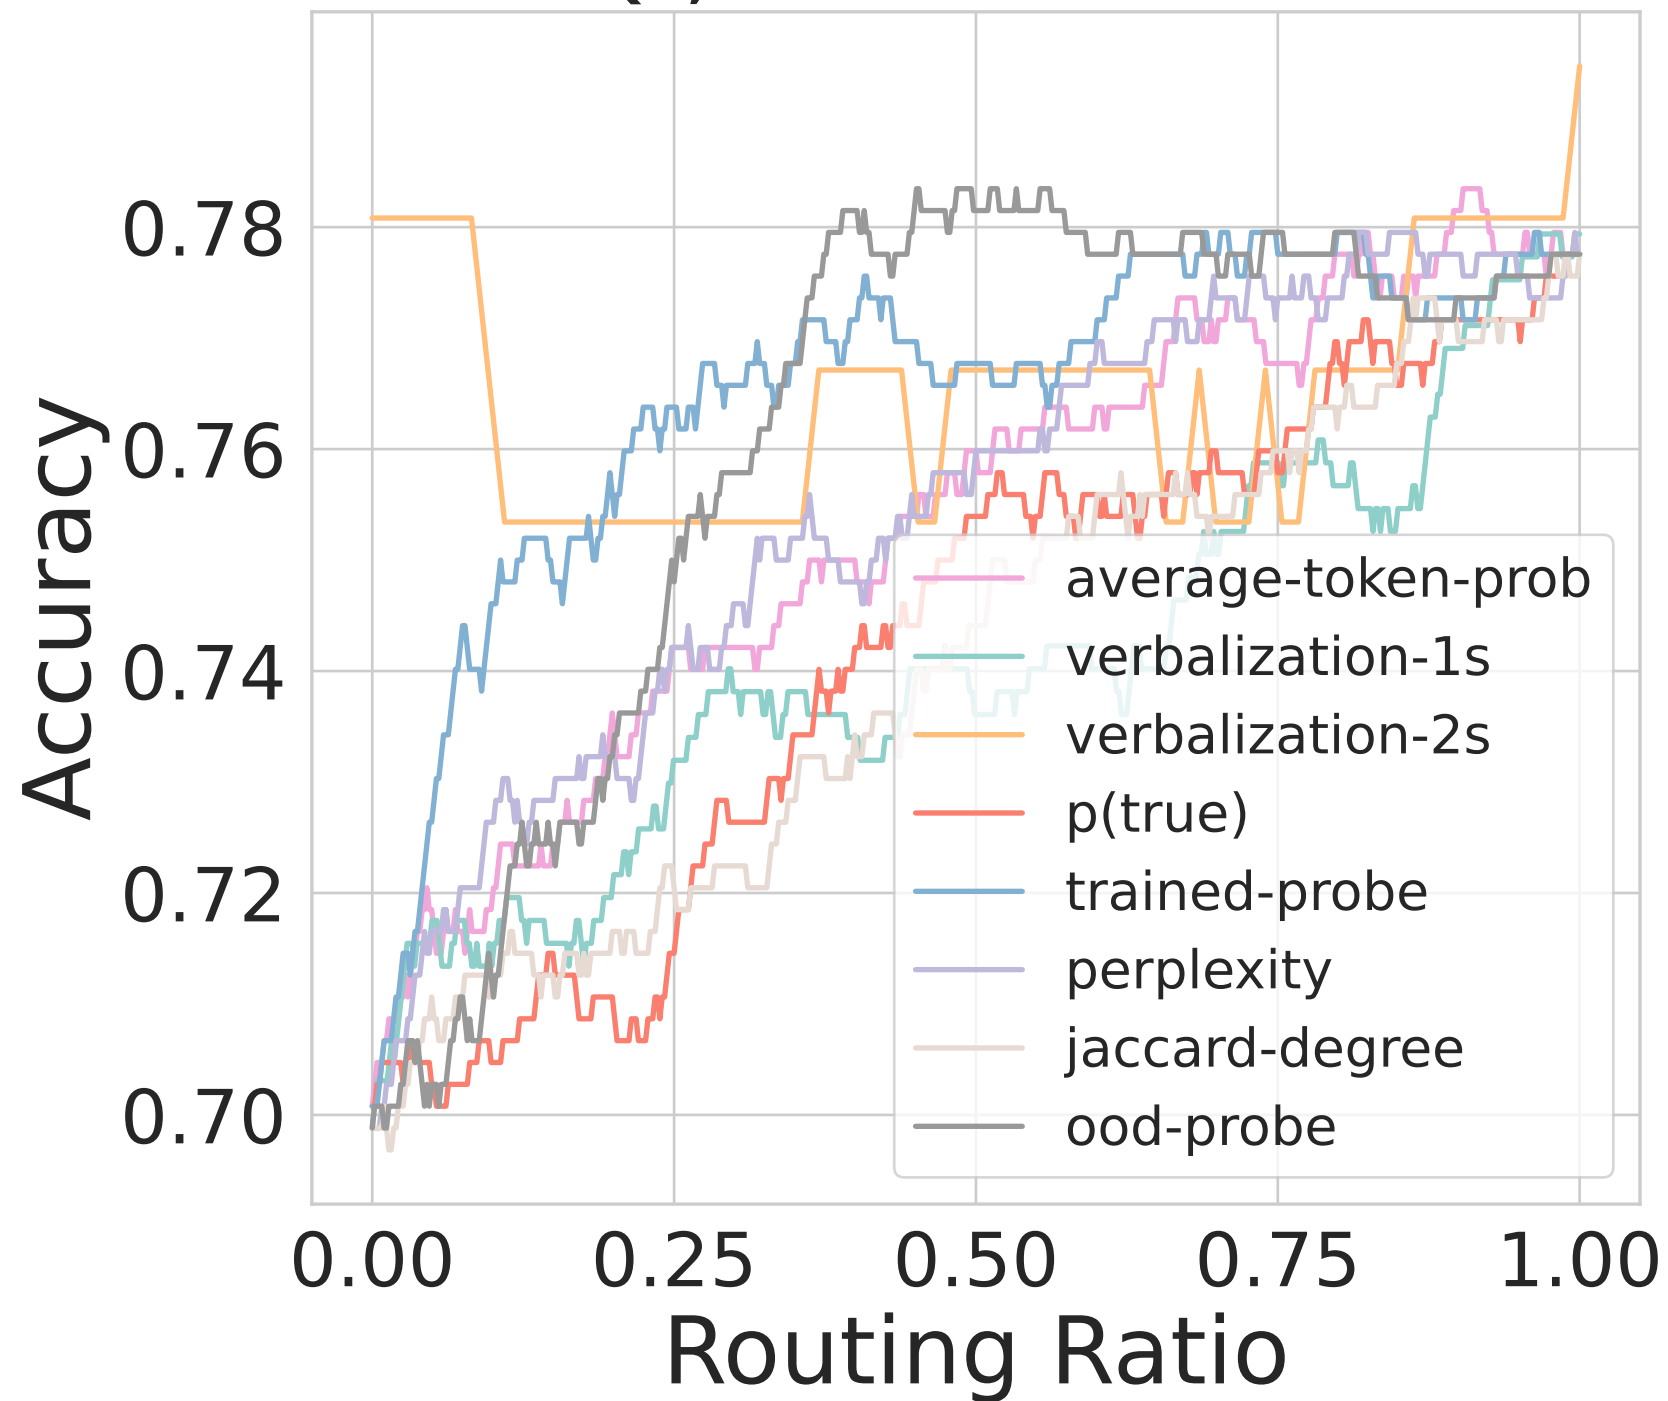

Supplement: supplementary_material [file rr_acc_social_i_qa_mistral-7b_gpt41.pdf › Routing_SLM_LLMs/Uncertainty-based Routing/w_legend/to_gpt41/rr_acc_social_i_qa_mistral-7b_gpt41.pdf]

**Social IQa, phi-3.5-mini to GPT-4.1 mini**

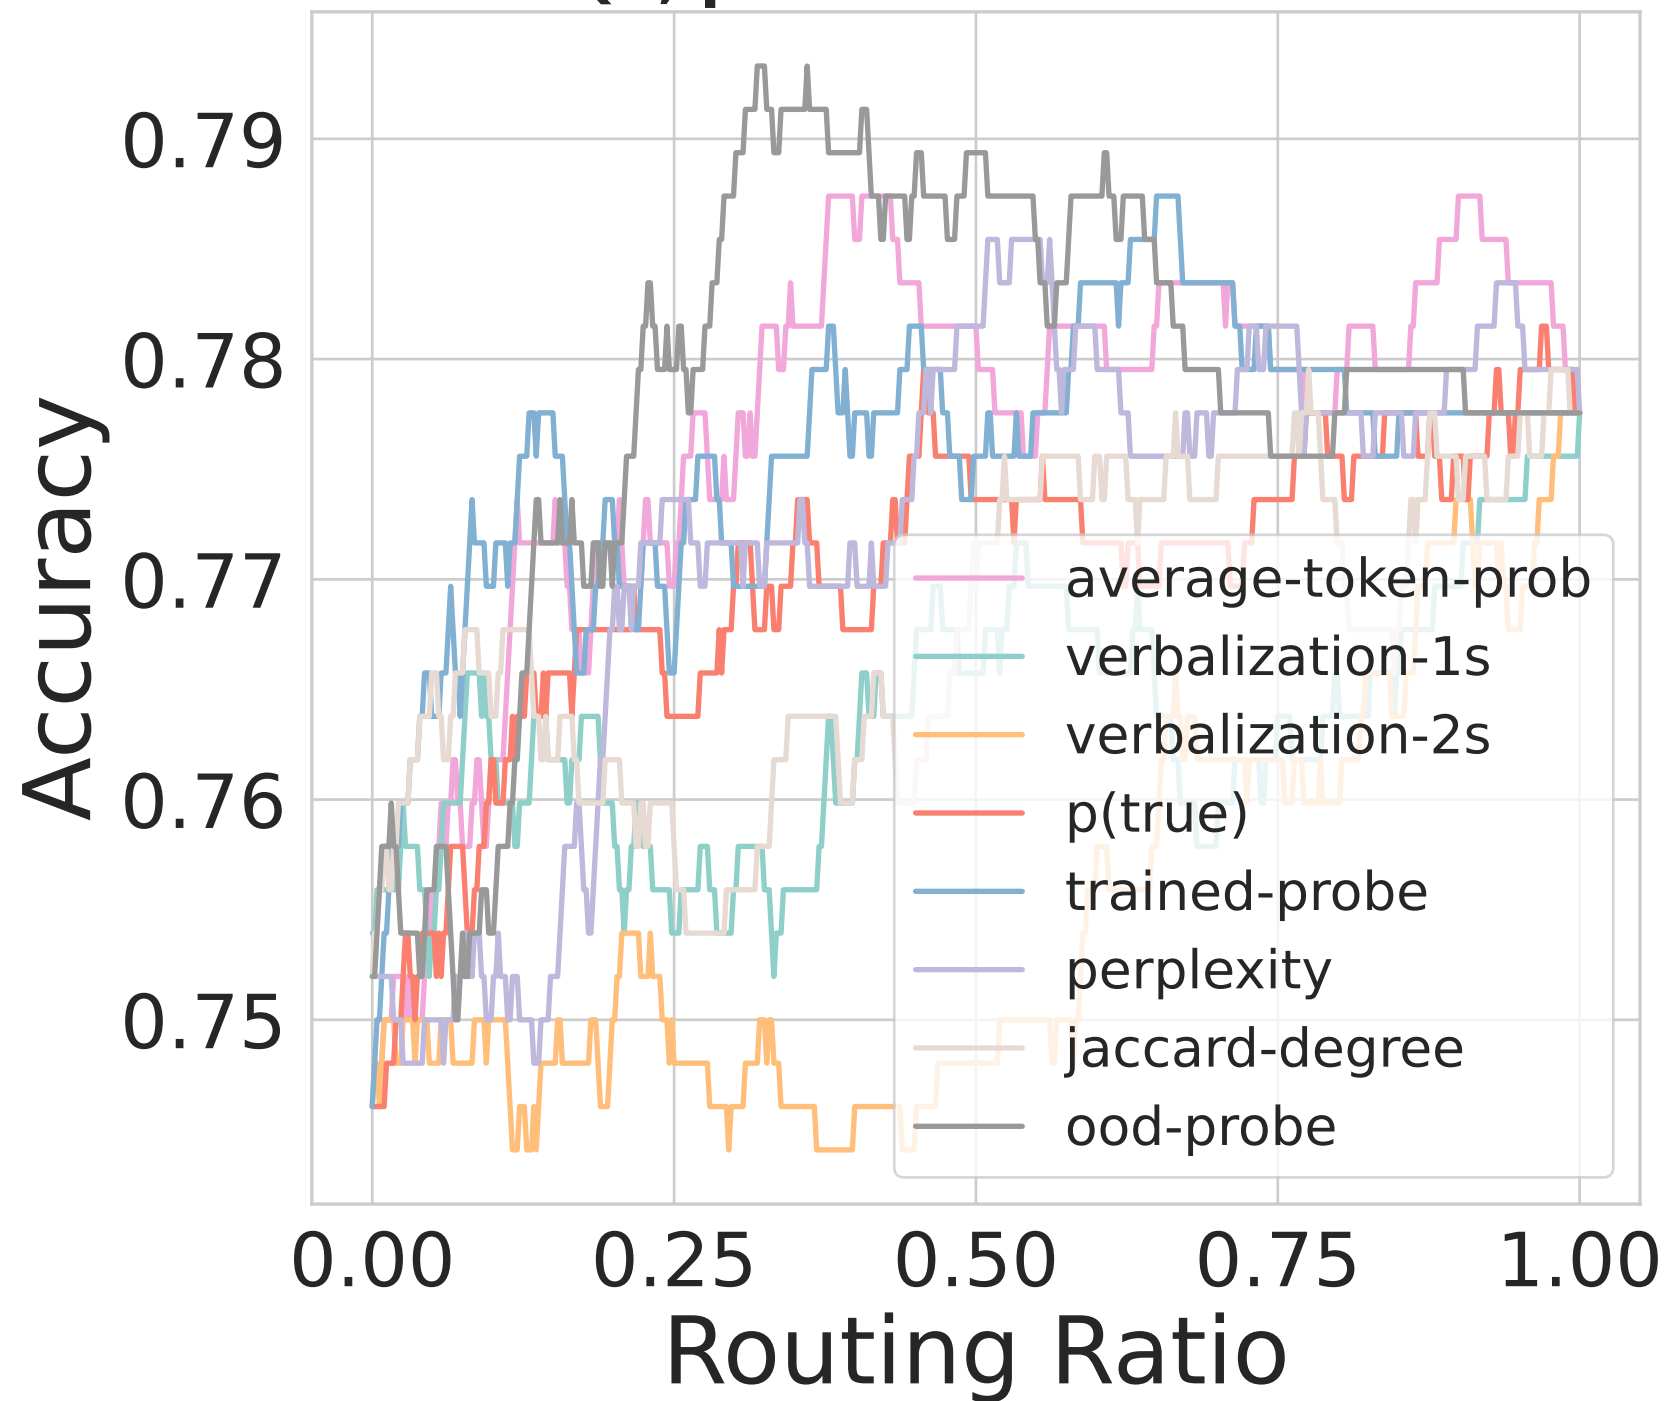

Supplement: supplementary_material [file rr_acc_social_i_qa_phi-3.5-mini_gpt41.pdf › Routing_SLM_LLMs/Uncertainty-based Routing/w_legend/to_gpt41/rr_acc_social_i_qa_phi-3.5-mini_gpt41.pdf]

# Social IQa, phi-4-mini-reasoning to GPT-4.1 mini

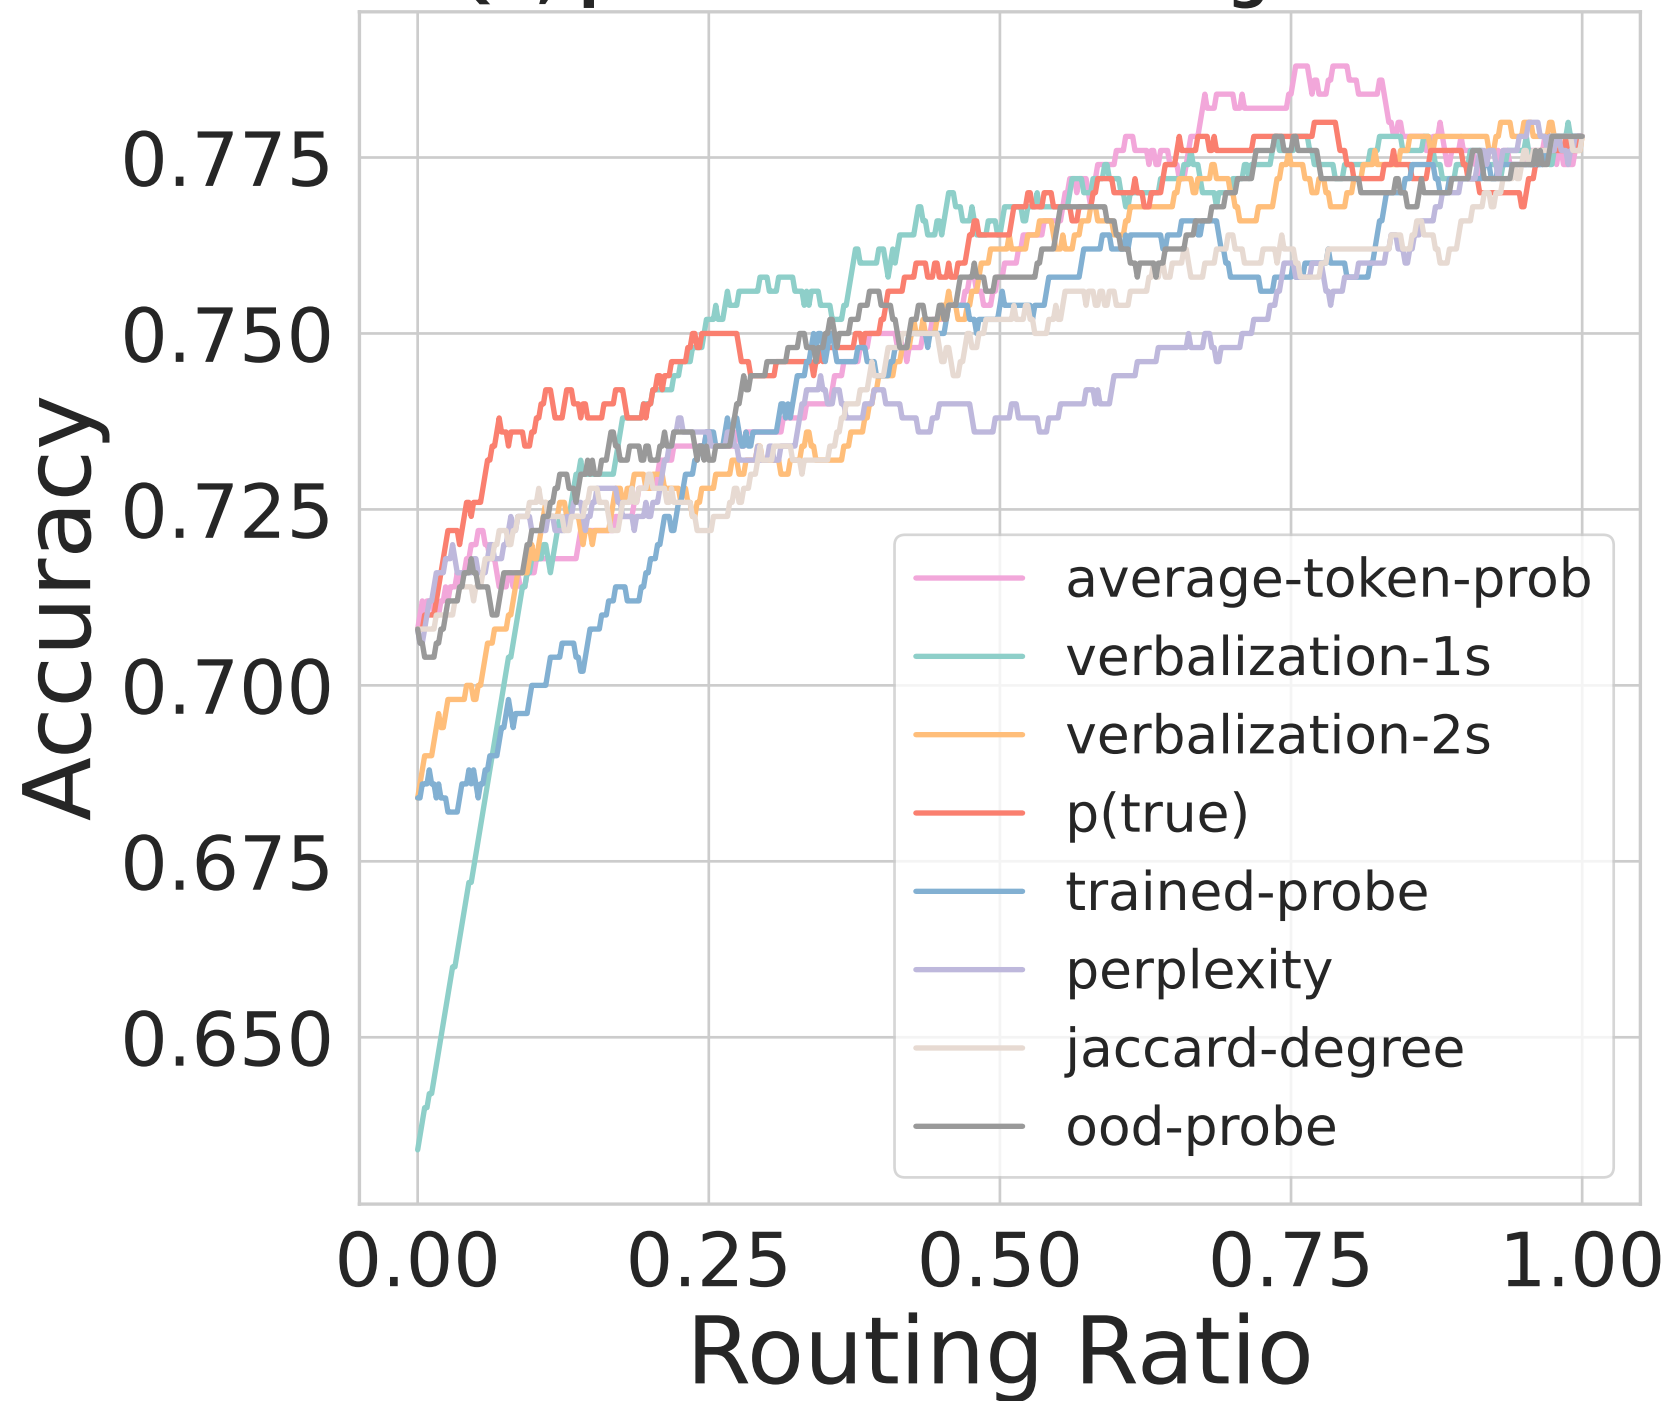

Supplement: supplementary_material [file rr_acc_social_i_qa_phi-4-mini-reasoning_gpt41.pdf › Routing_SLM_LLMs/Uncertainty-based Routing/w_legend/to_gpt41/rr_acc_social_i_qa_phi-4-mini-reasoning_gpt41.pdf]

## Social IQa, rwkv to GPT-4.1 mini

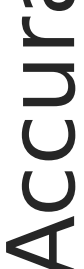

Supplement: supplementary_material [file rr_acc_social_i_qa_rwkv_gpt41.pdf › Routing_SLM_LLMs/Uncertainty-based Routing/w_legend/to_gpt41/rr_acc_social_i_qa_rwkv_gpt41.pdf]

**SVAMP, Qwen3-0.6B to GPT-4.1 mini**

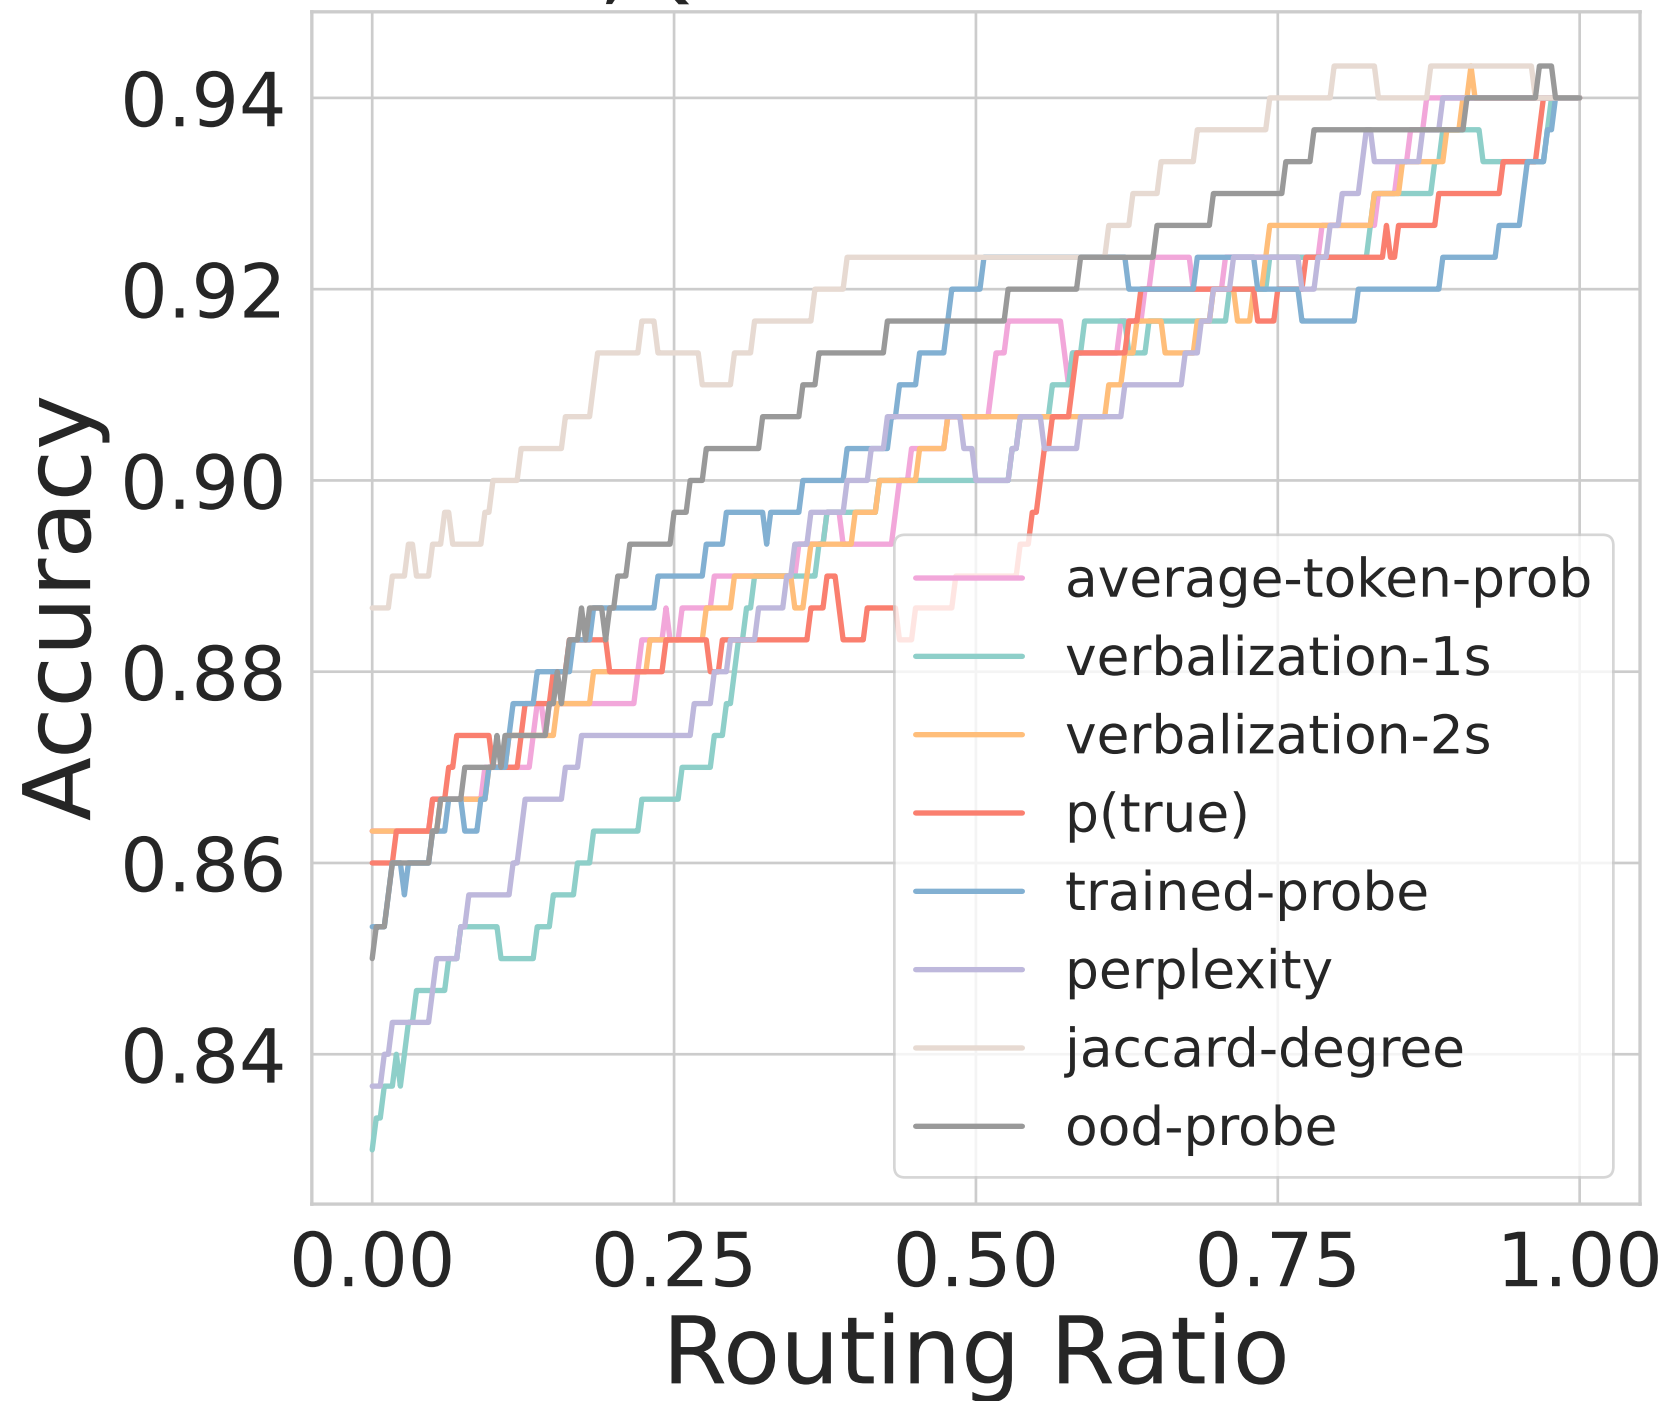

Supplement: supplementary_material [file rr_acc_svamp_Qwen3-0.6B_gpt41.pdf › Routing_SLM_LLMs/Uncertainty-based Routing/w_legend/to_gpt41/rr_acc_svamp_Qwen3-0.6B_gpt41.pdf]

# SVAMP, Qwen3-1.7B to GPT-4.1 mini

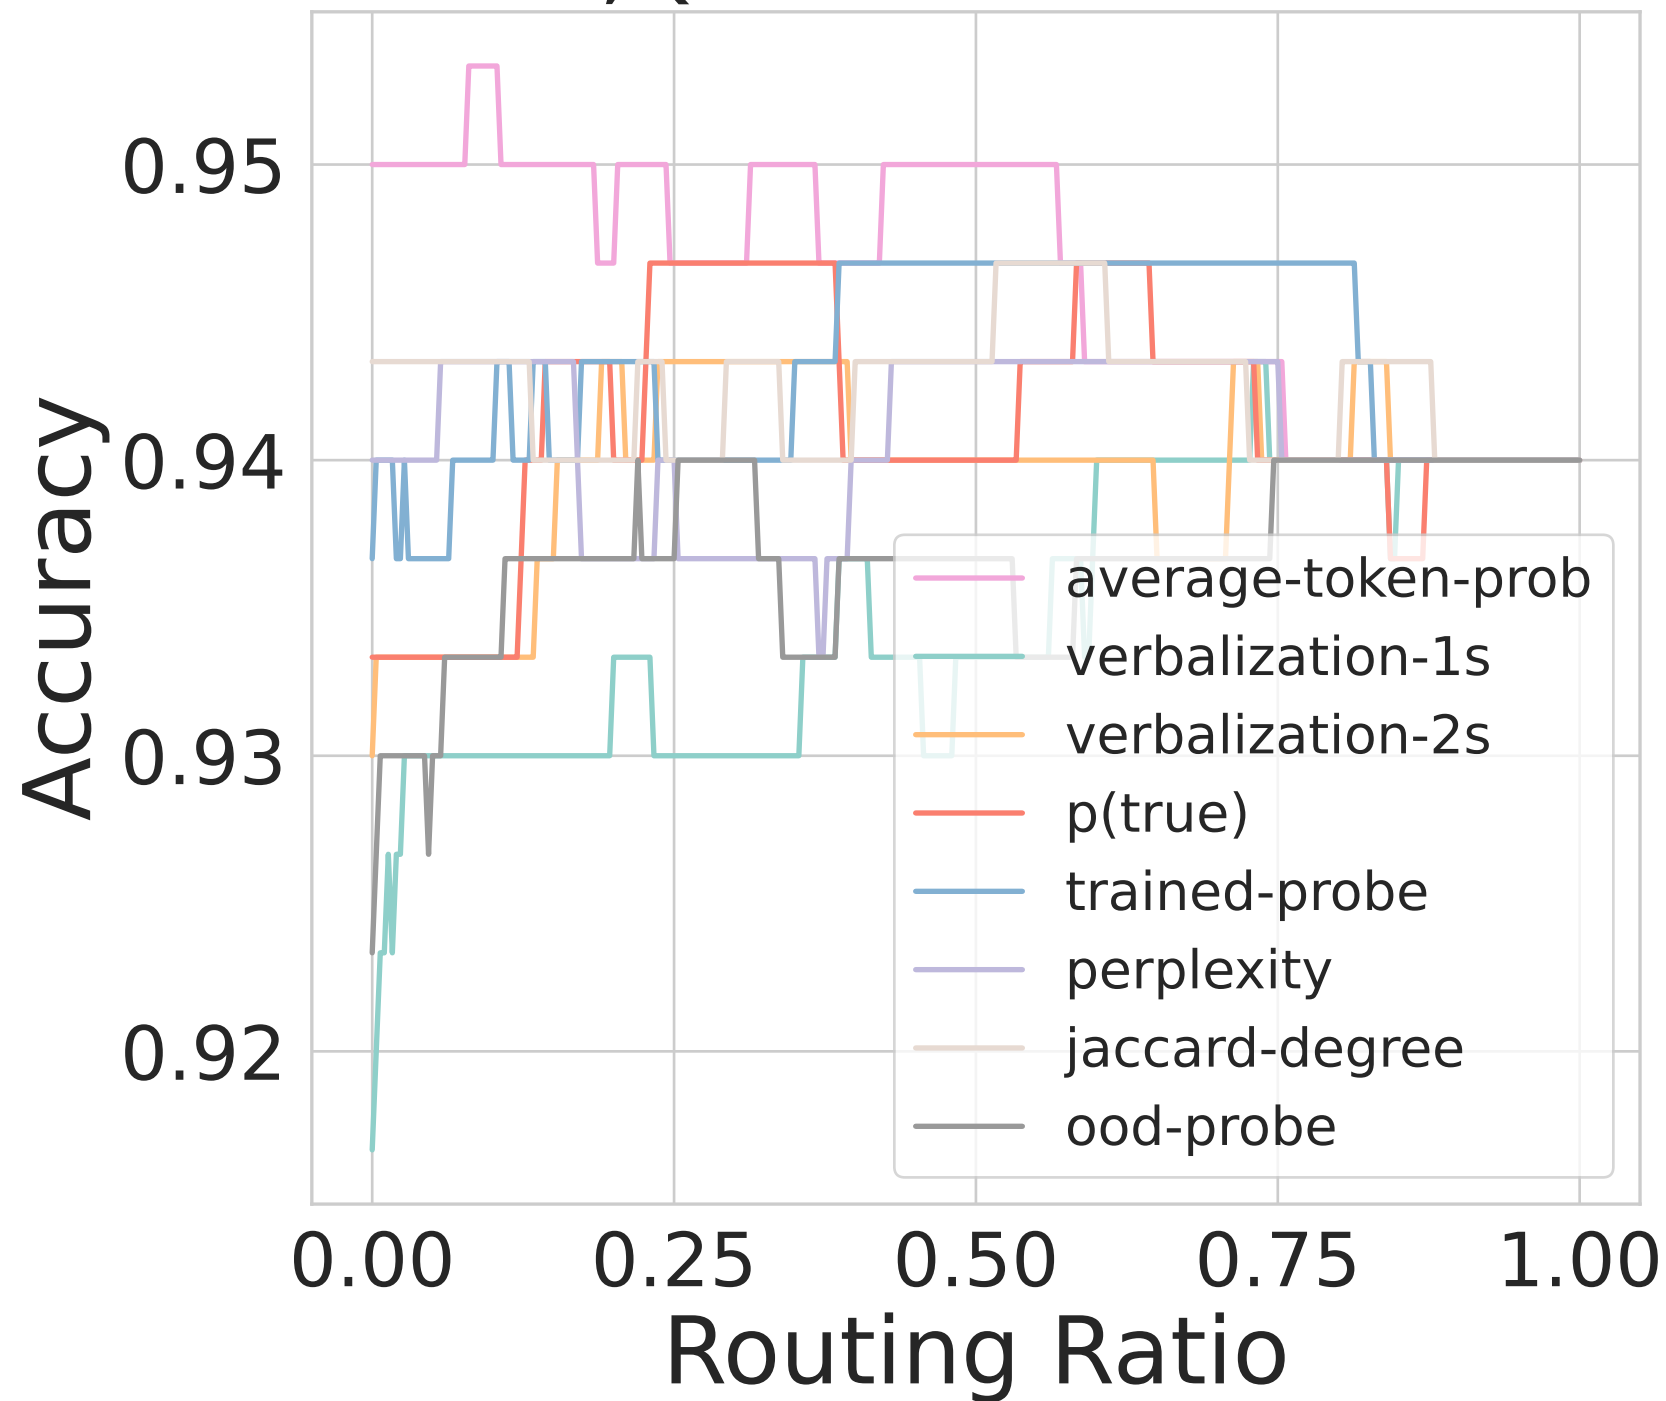

Supplement: supplementary_material [file rr_acc_svamp_Qwen3-1.7B_gpt41.pdf › Routing_SLM_LLMs/Uncertainty-based Routing/w_legend/to_gpt41/rr_acc_svamp_Qwen3-1.7B_gpt41.pdf]

## SVAMP, Qwen3-4B to GPT-4.1 mini

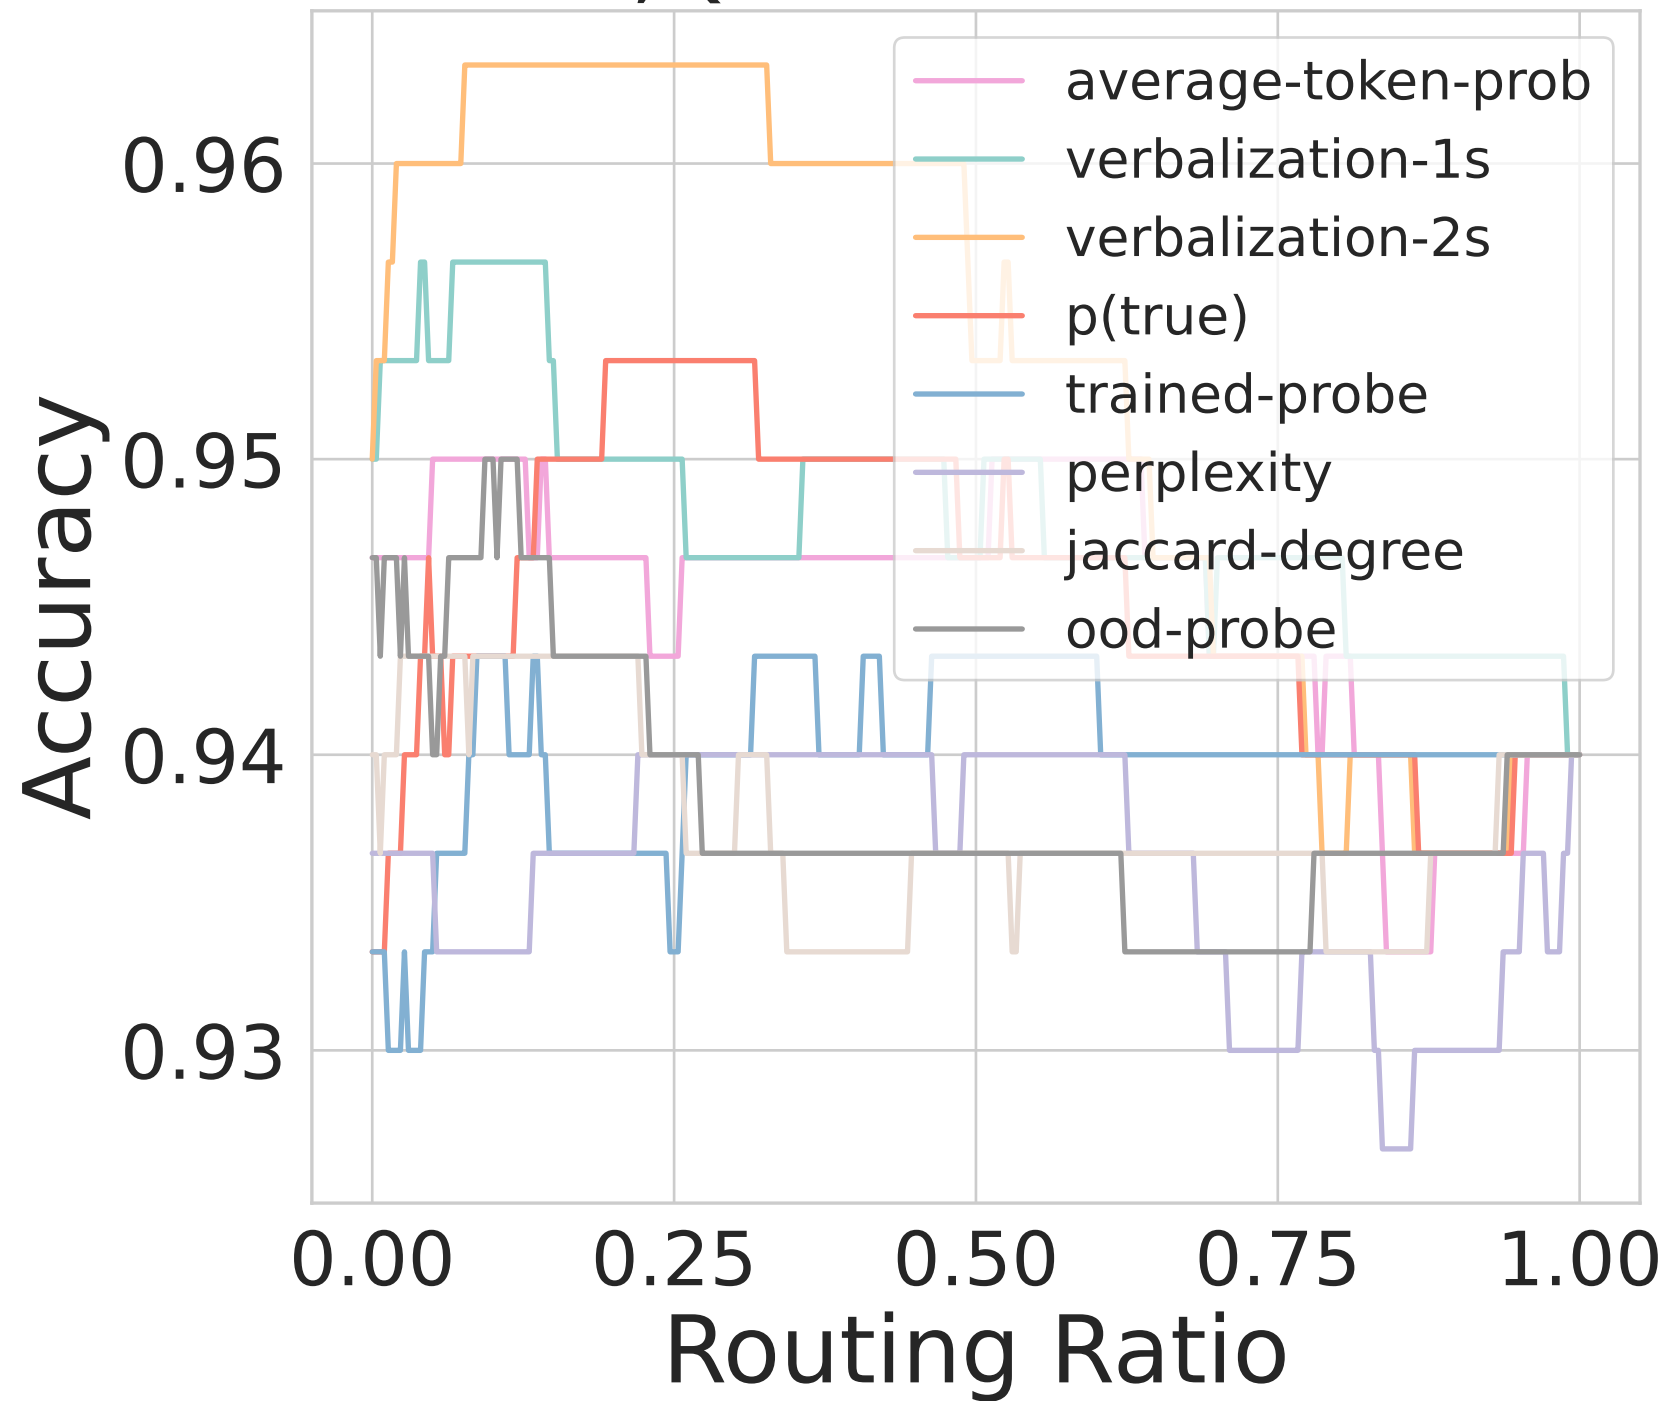

Supplement: supplementary_material [file rr_acc_svamp_Qwen3-4B_gpt41.pdf › Routing_SLM_LLMs/Uncertainty-based Routing/w_legend/to_gpt41/rr_acc_svamp_Qwen3-4B_gpt41.pdf]

# SVAMP, llama-3.1-8b to GPT-4.1 mini

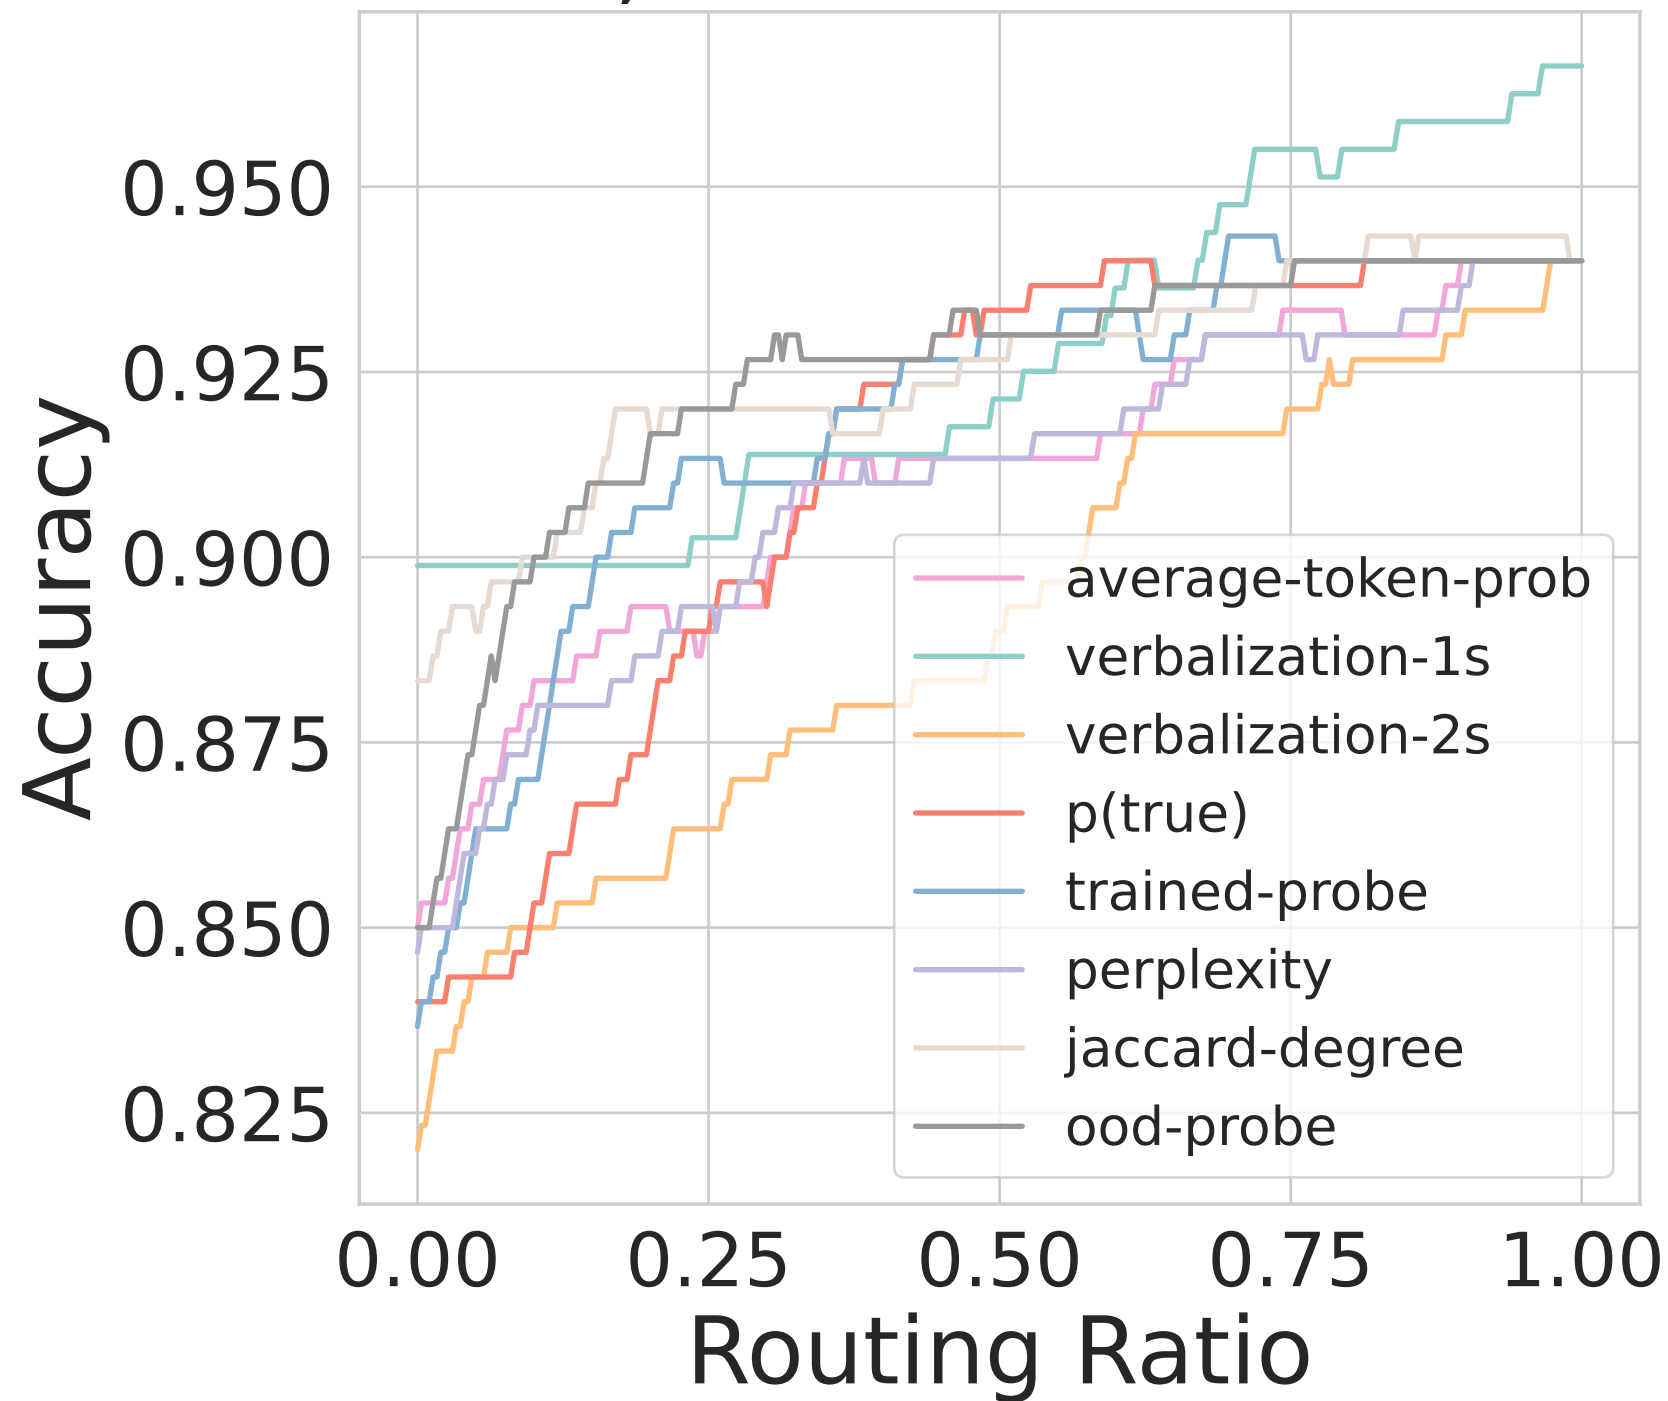

Supplement: supplementary_material [file rr_acc_svamp_llama-3.1-8b_gpt41.pdf › Routing_SLM_LLMs/Uncertainty-based Routing/w_legend/to_gpt41/rr_acc_svamp_llama-3.1-8b_gpt41.pdf]

# SVAMP, llama-3.2-1b to GPT-4.1 mini

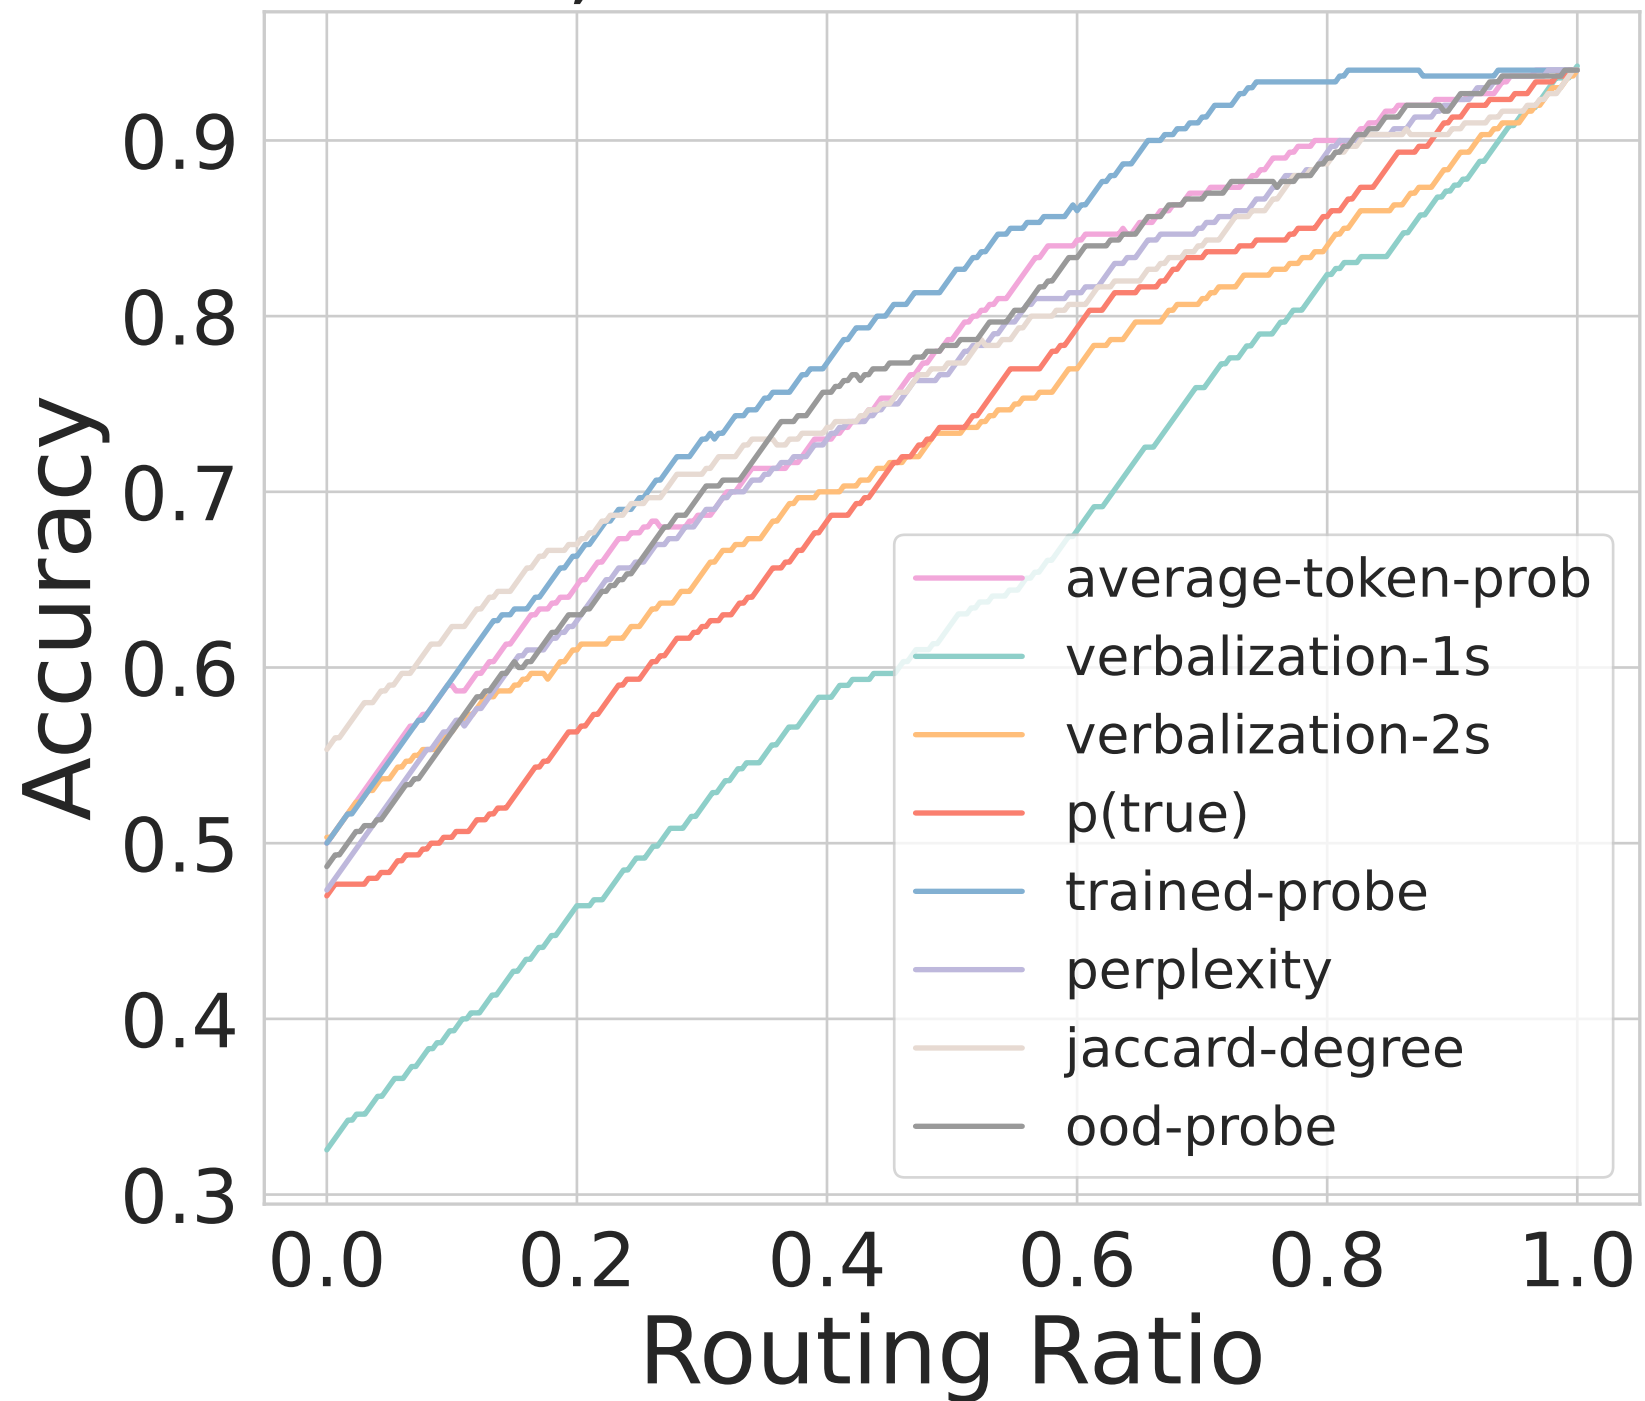

Supplement: supplementary_material [file rr_acc_svamp_llama-3.2-1b_gpt41.pdf › Routing_SLM_LLMs/Uncertainty-based Routing/w_legend/to_gpt41/rr_acc_svamp_llama-3.2-1b_gpt41.pdf]
