# Supplementary material (part 12 of 14)
Source: ML conference proceedings conference paper supplement (https://openreview.net/forum?id=smdbra3VEi)

# MATH-500, rwkv to Llama-3.1-70B

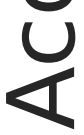

Supplement: supplementary_material [file rr_acc_math_500_rwkv_llama70.pdf › Routing_SLM_LLMs/Uncertainty-based Routing/w_legend/to_llama70/rr_acc_math_500_rwkv_llama70.pdf]

# MMLU, Qwen3-0.6B to Llama-3.1-70B

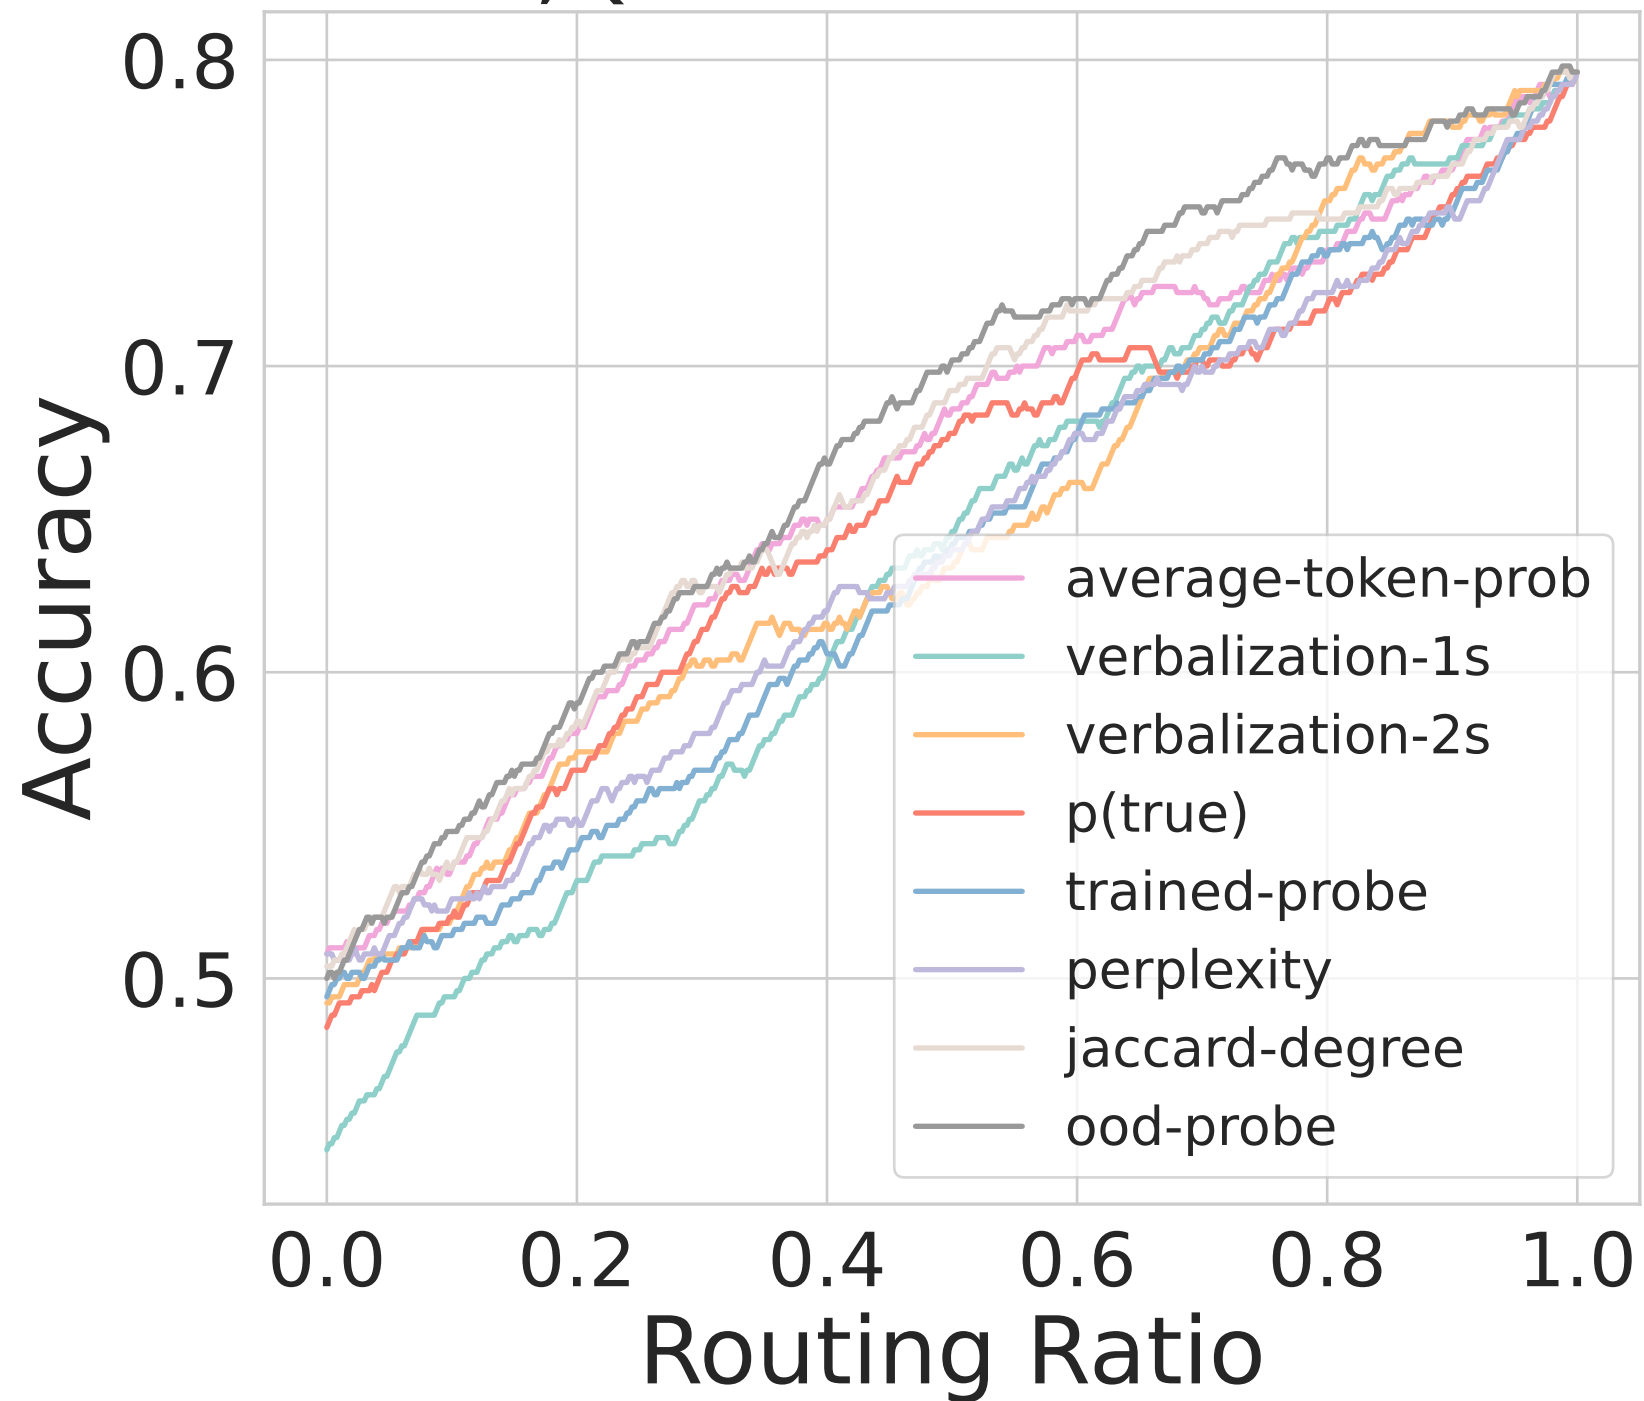

Supplement: supplementary_material [file rr_acc_mmlu_Qwen3-0.6B_llama70.pdf › Routing_SLM_LLMs/Uncertainty-based Routing/w_legend/to_llama70/rr_acc_mmlu_Qwen3-0.6B_llama70.pdf]

## MMLU, Qwen3-1.7B to Llama-3.1-70B

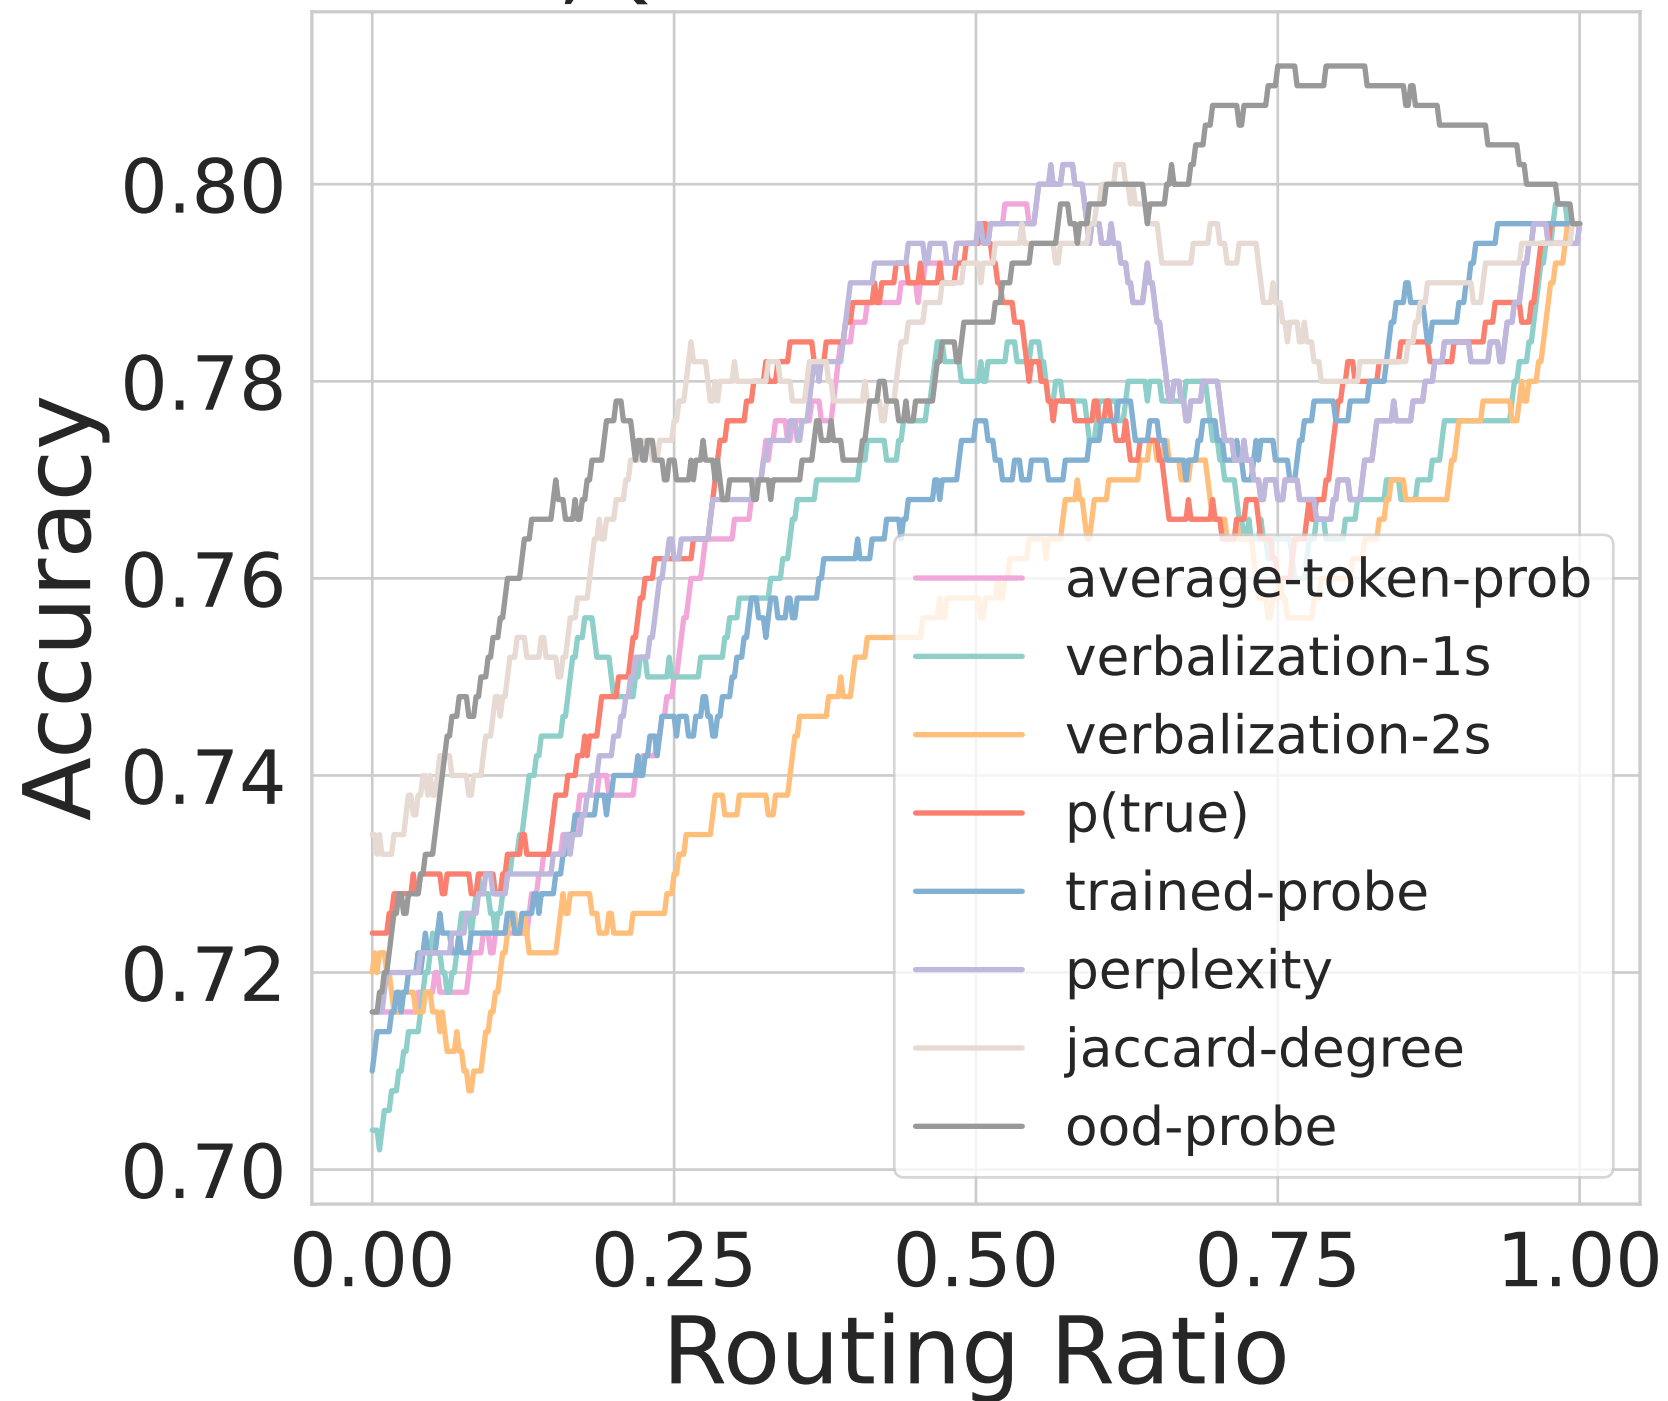

Supplement: supplementary_material [file rr_acc_mmlu_Qwen3-1.7B_llama70.pdf › Routing_SLM_LLMs/Uncertainty-based Routing/w_legend/to_llama70/rr_acc_mmlu_Qwen3-1.7B_llama70.pdf]

# MMLU, Qwen3-4B to Llama-3.1-70B

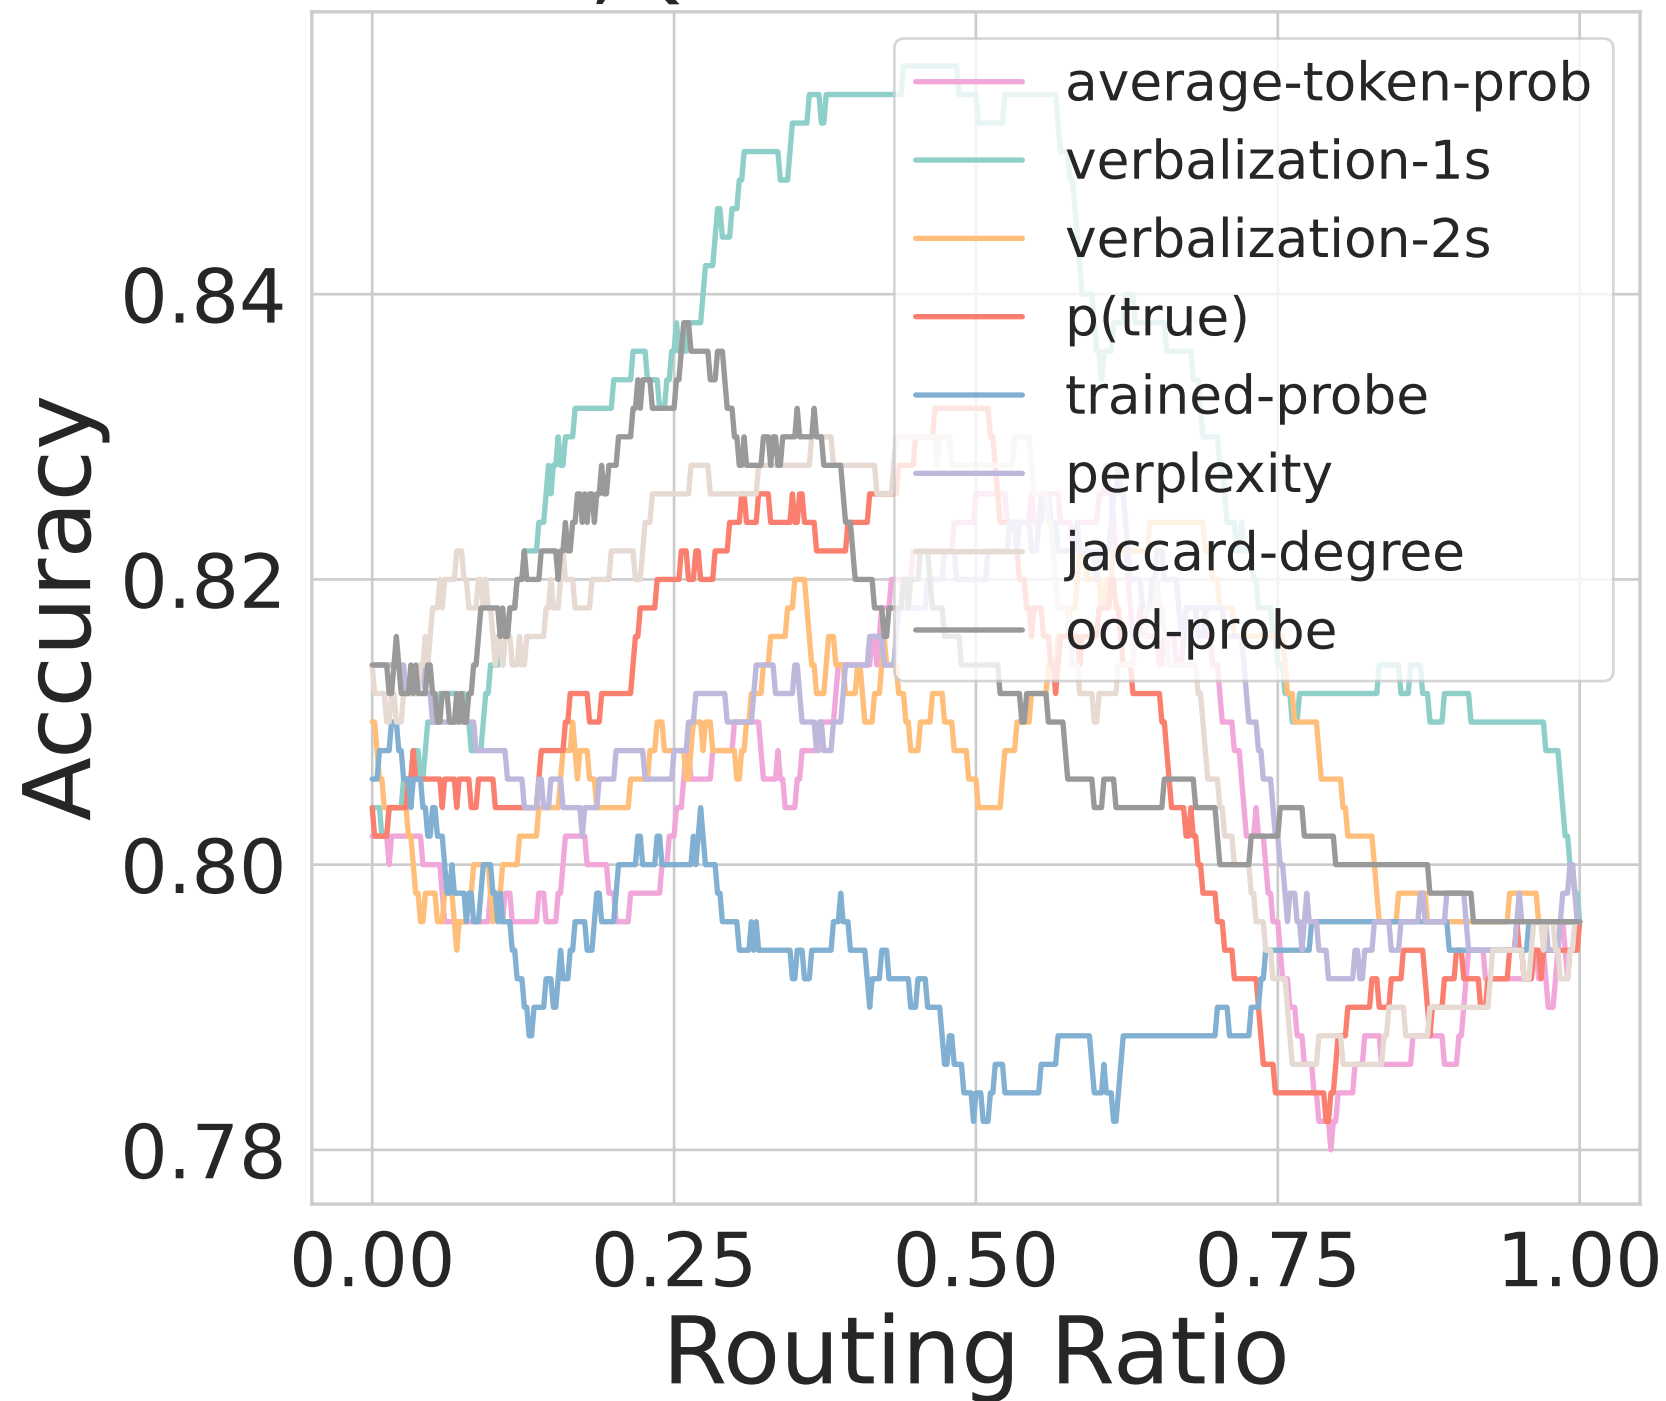

Supplement: supplementary_material [file rr_acc_mmlu_Qwen3-4B_llama70.pdf › Routing_SLM_LLMs/Uncertainty-based Routing/w_legend/to_llama70/rr_acc_mmlu_Qwen3-4B_llama70.pdf]

## MMLU, granite-3.1-8b to Llama-3.1-70B

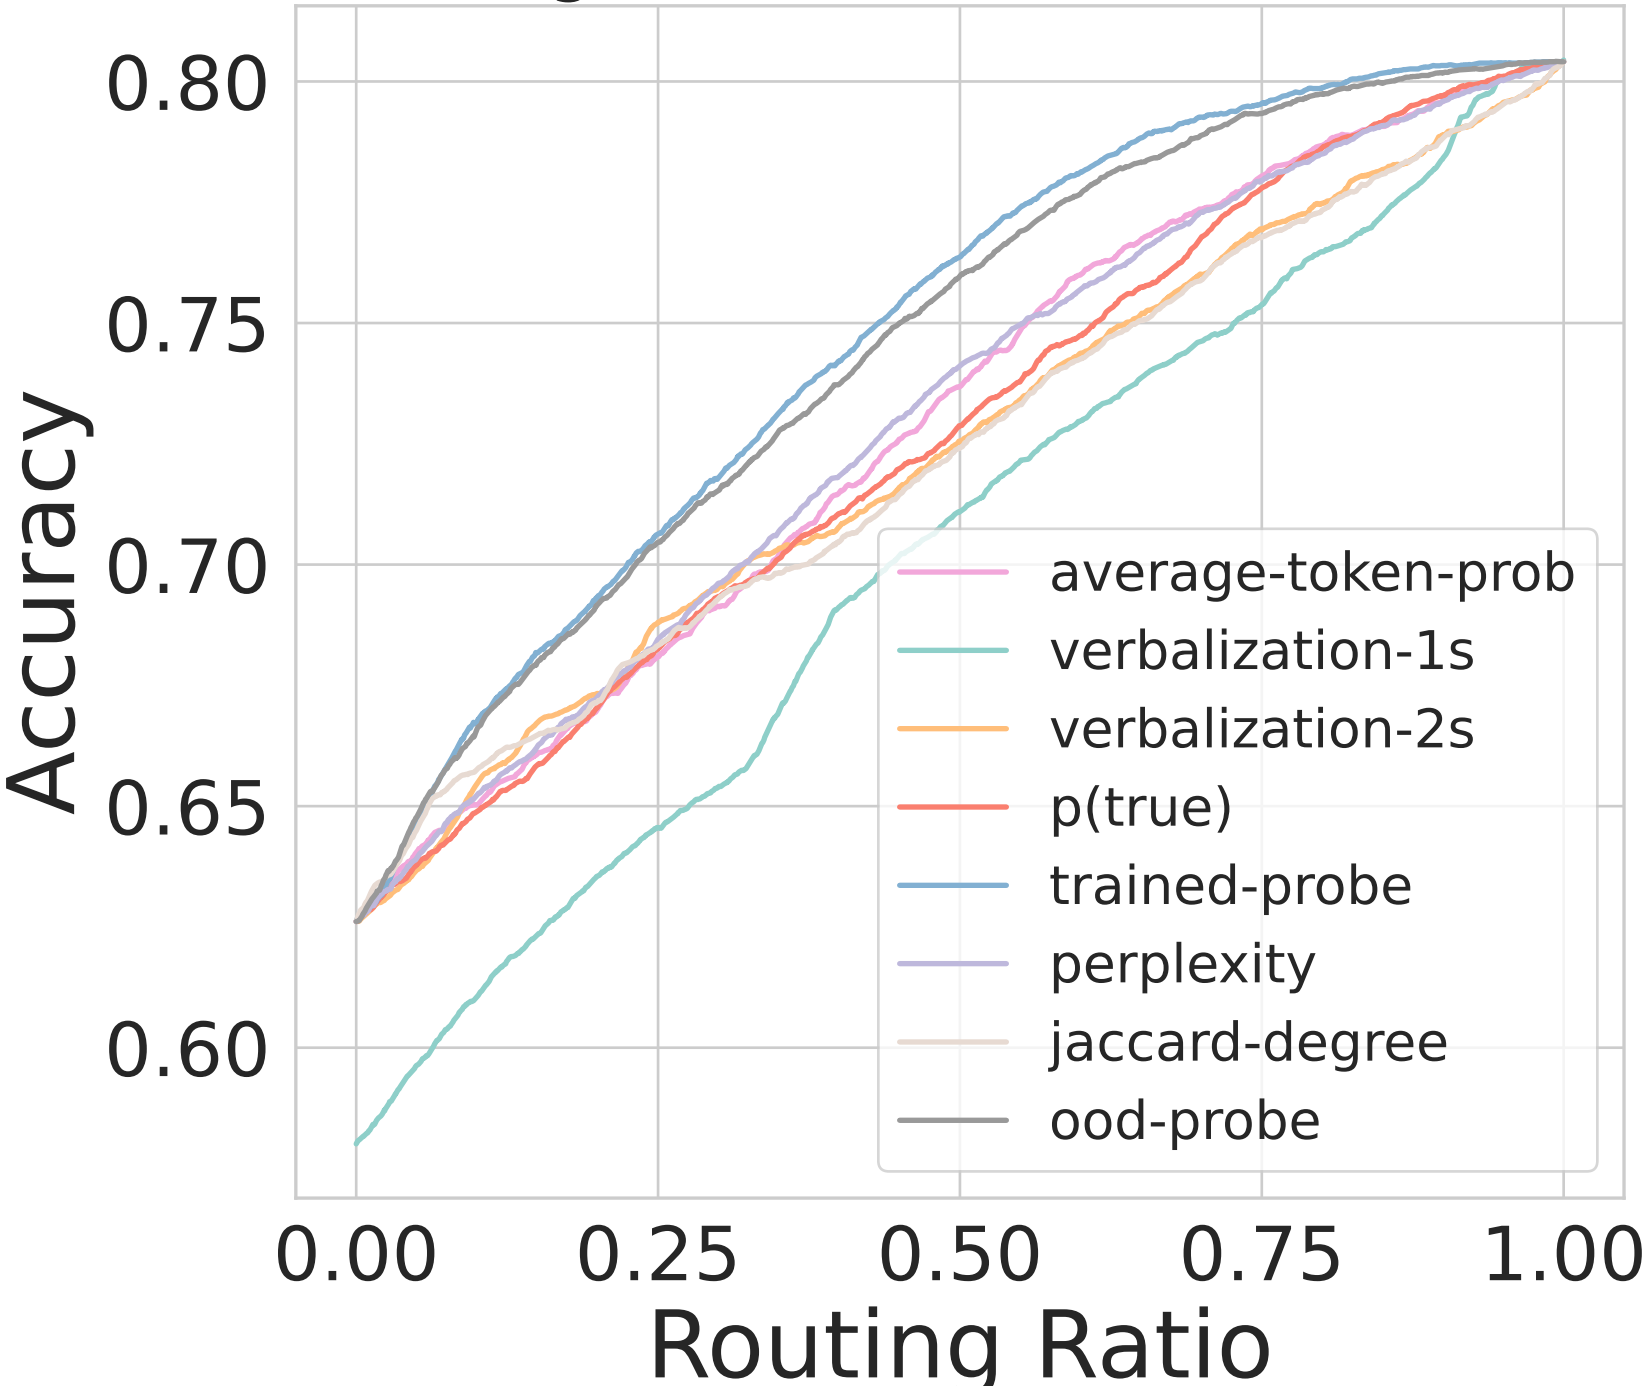

Supplement: supplementary_material [file rr_acc_mmlu_granite-3.1-8b_llama70.pdf › Routing_SLM_LLMs/Uncertainty-based Routing/w_legend/to_llama70/rr_acc_mmlu_granite-3.1-8b_llama70.pdf]

## MMLU, llama-3.1-8b to Llama-3.1-70B

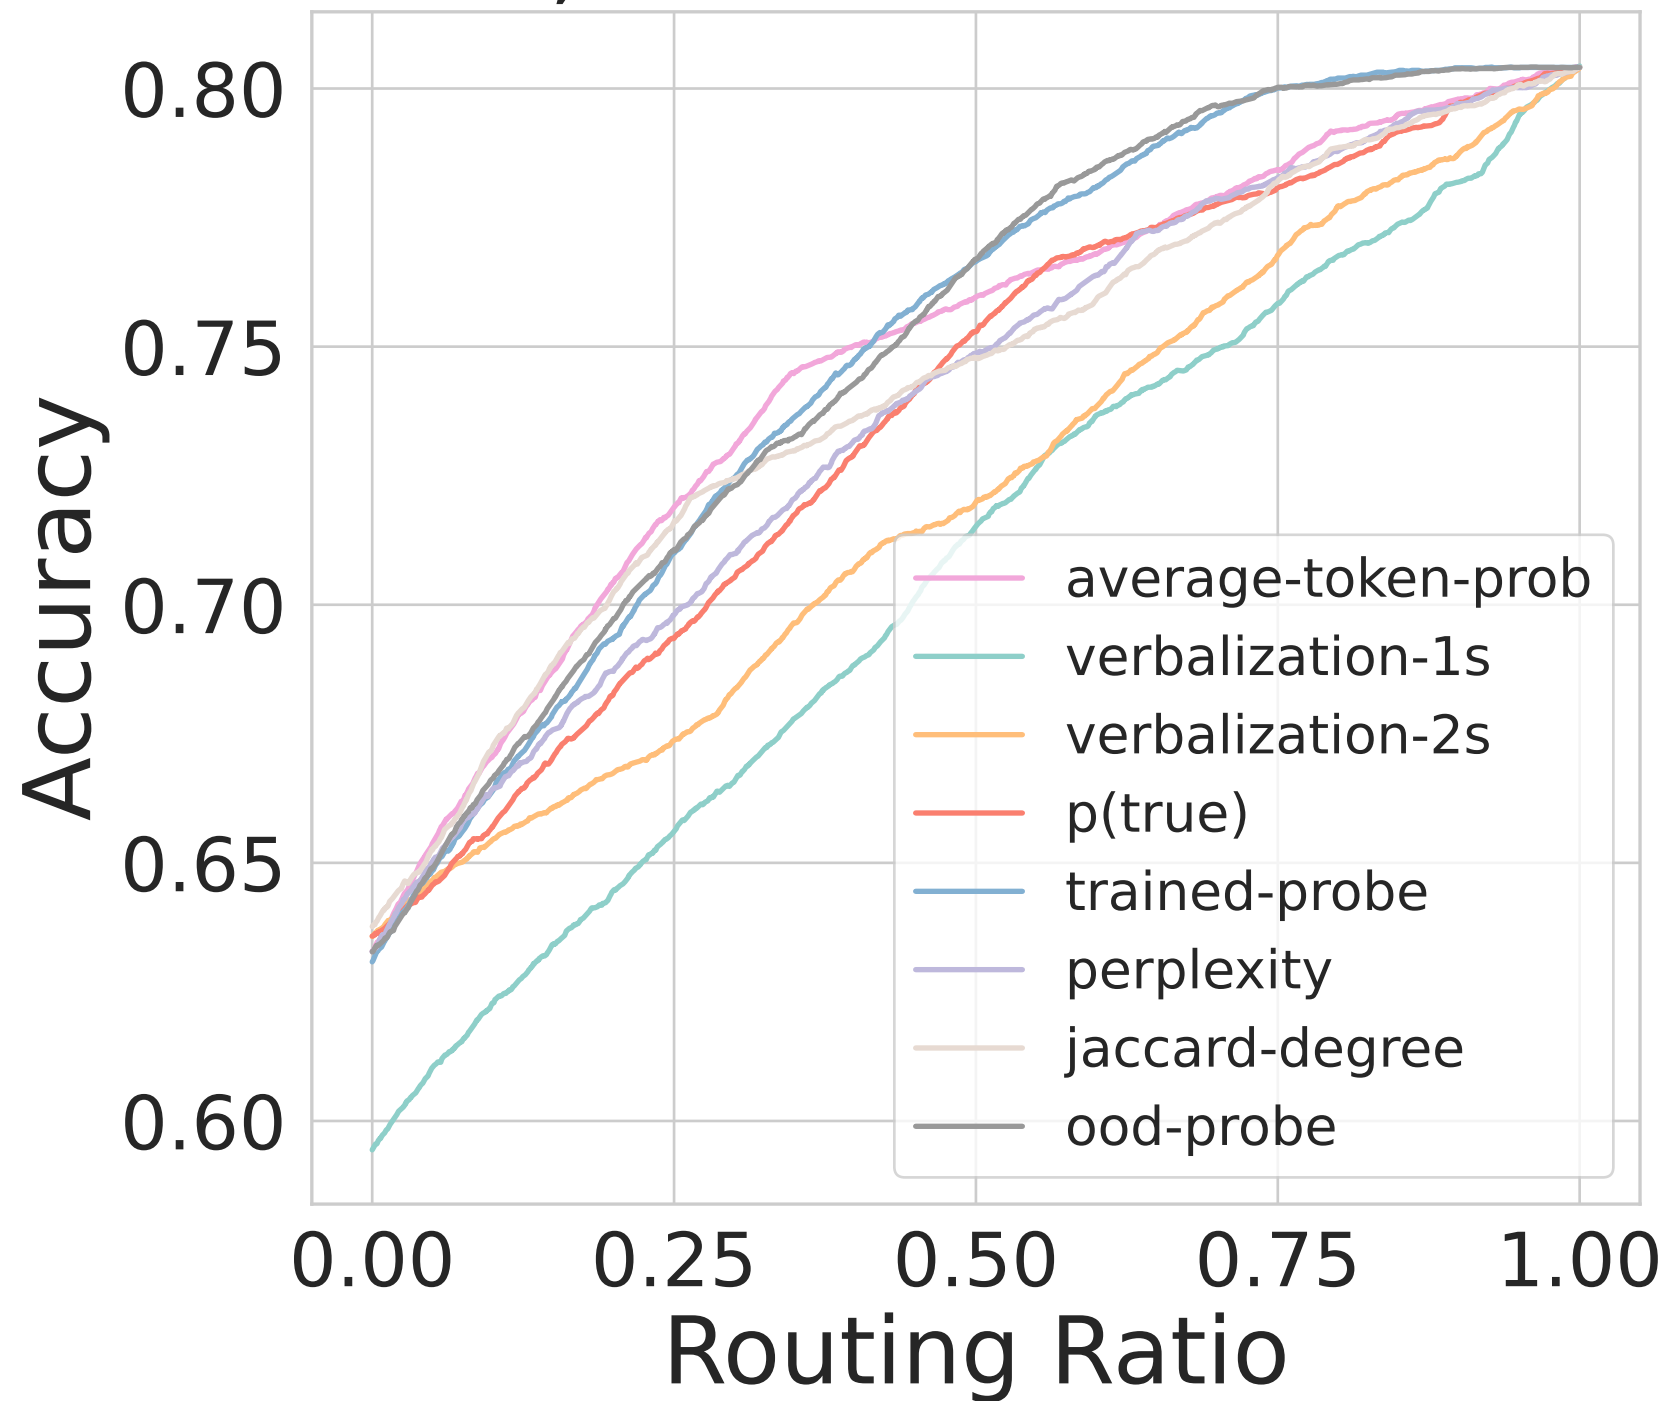

Supplement: supplementary_material [file rr_acc_mmlu_llama-3.1-8b_llama70.pdf › Routing_SLM_LLMs/Uncertainty-based Routing/w_legend/to_llama70/rr_acc_mmlu_llama-3.1-8b_llama70.pdf]

**MMLU, llama-3.2-1b to Llama-3.1-70B**

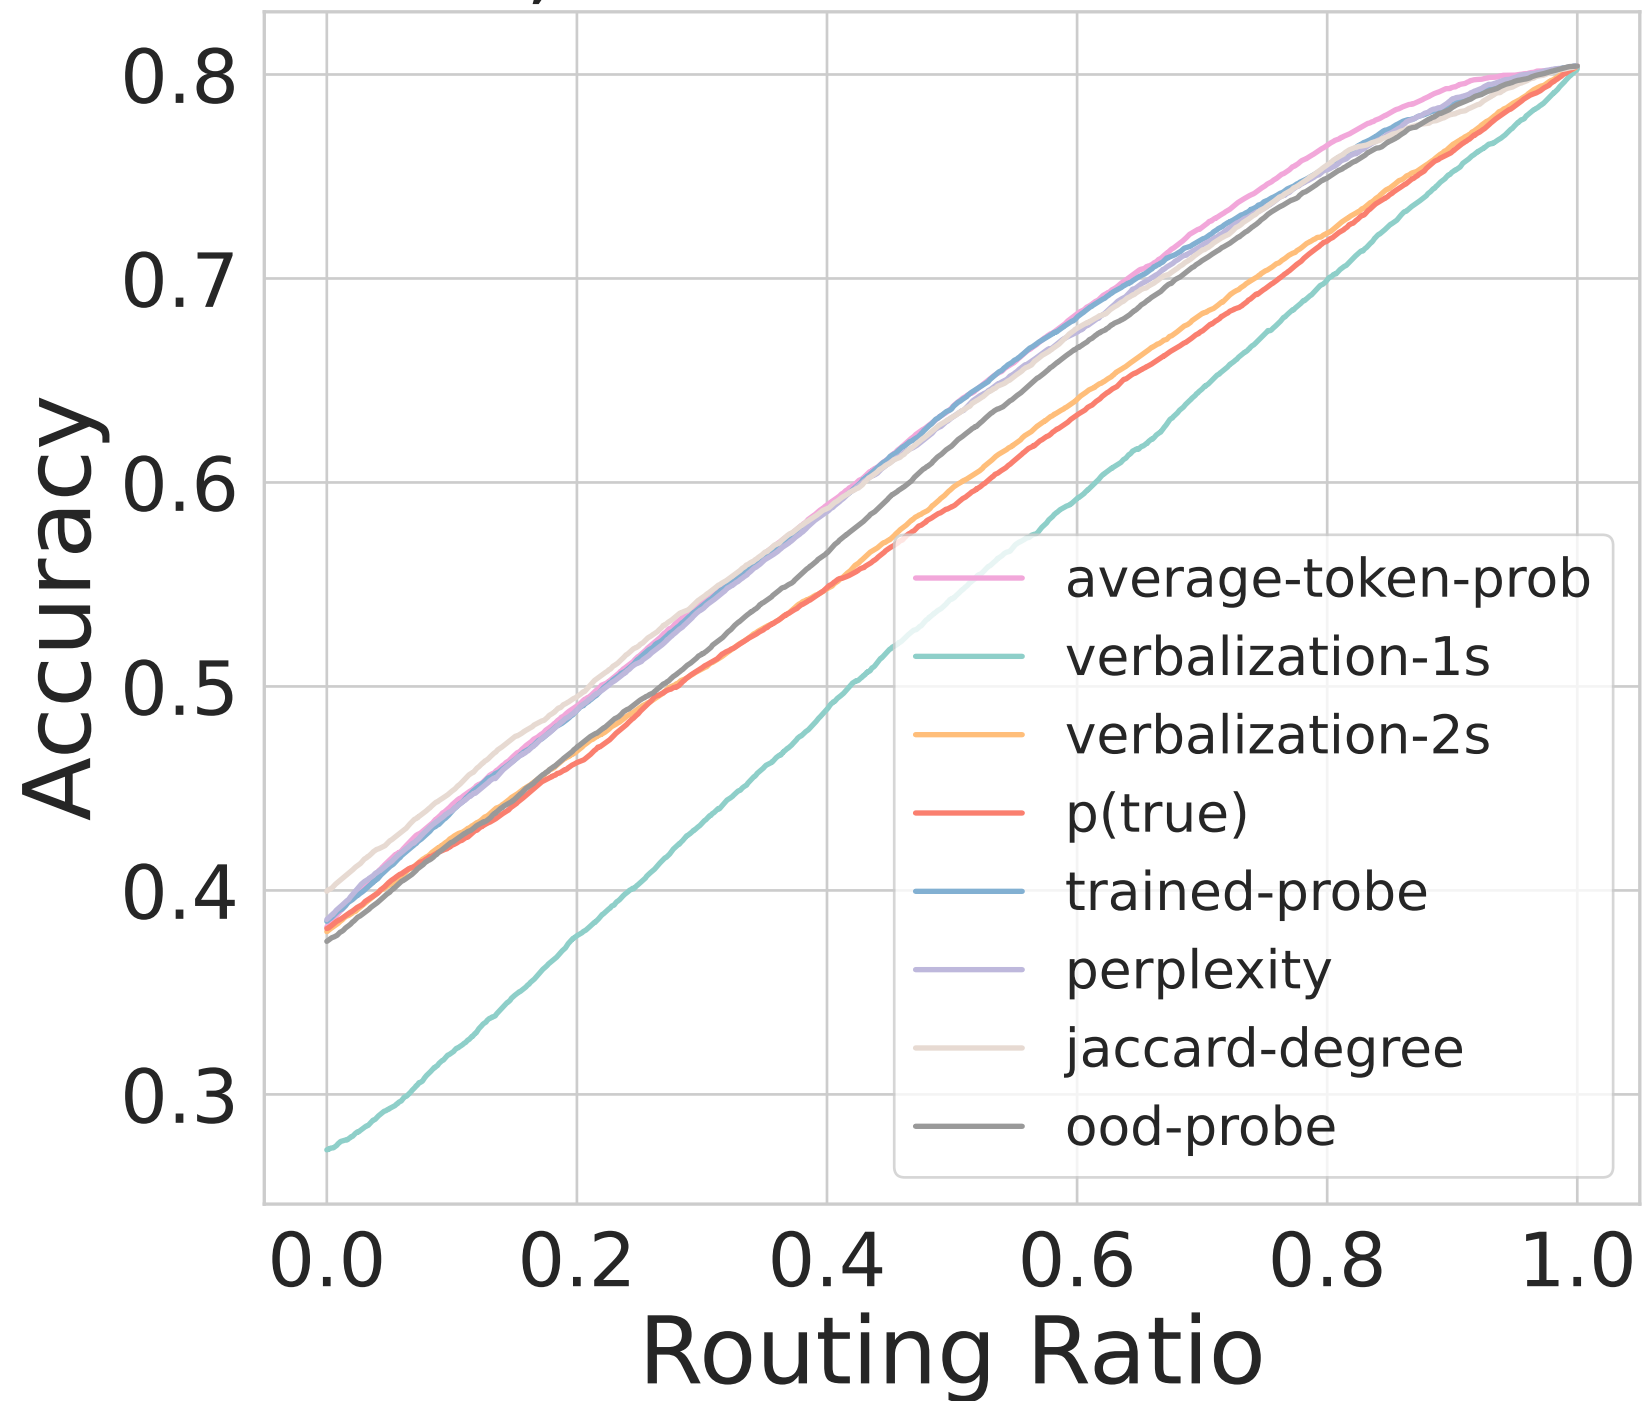

Supplement: supplementary_material [file rr_acc_mmlu_llama-3.2-1b_llama70.pdf › Routing_SLM_LLMs/Uncertainty-based Routing/w_legend/to_llama70/rr_acc_mmlu_llama-3.2-1b_llama70.pdf]

## MMLU, llama-3.2-3b to Llama-3.1-70B

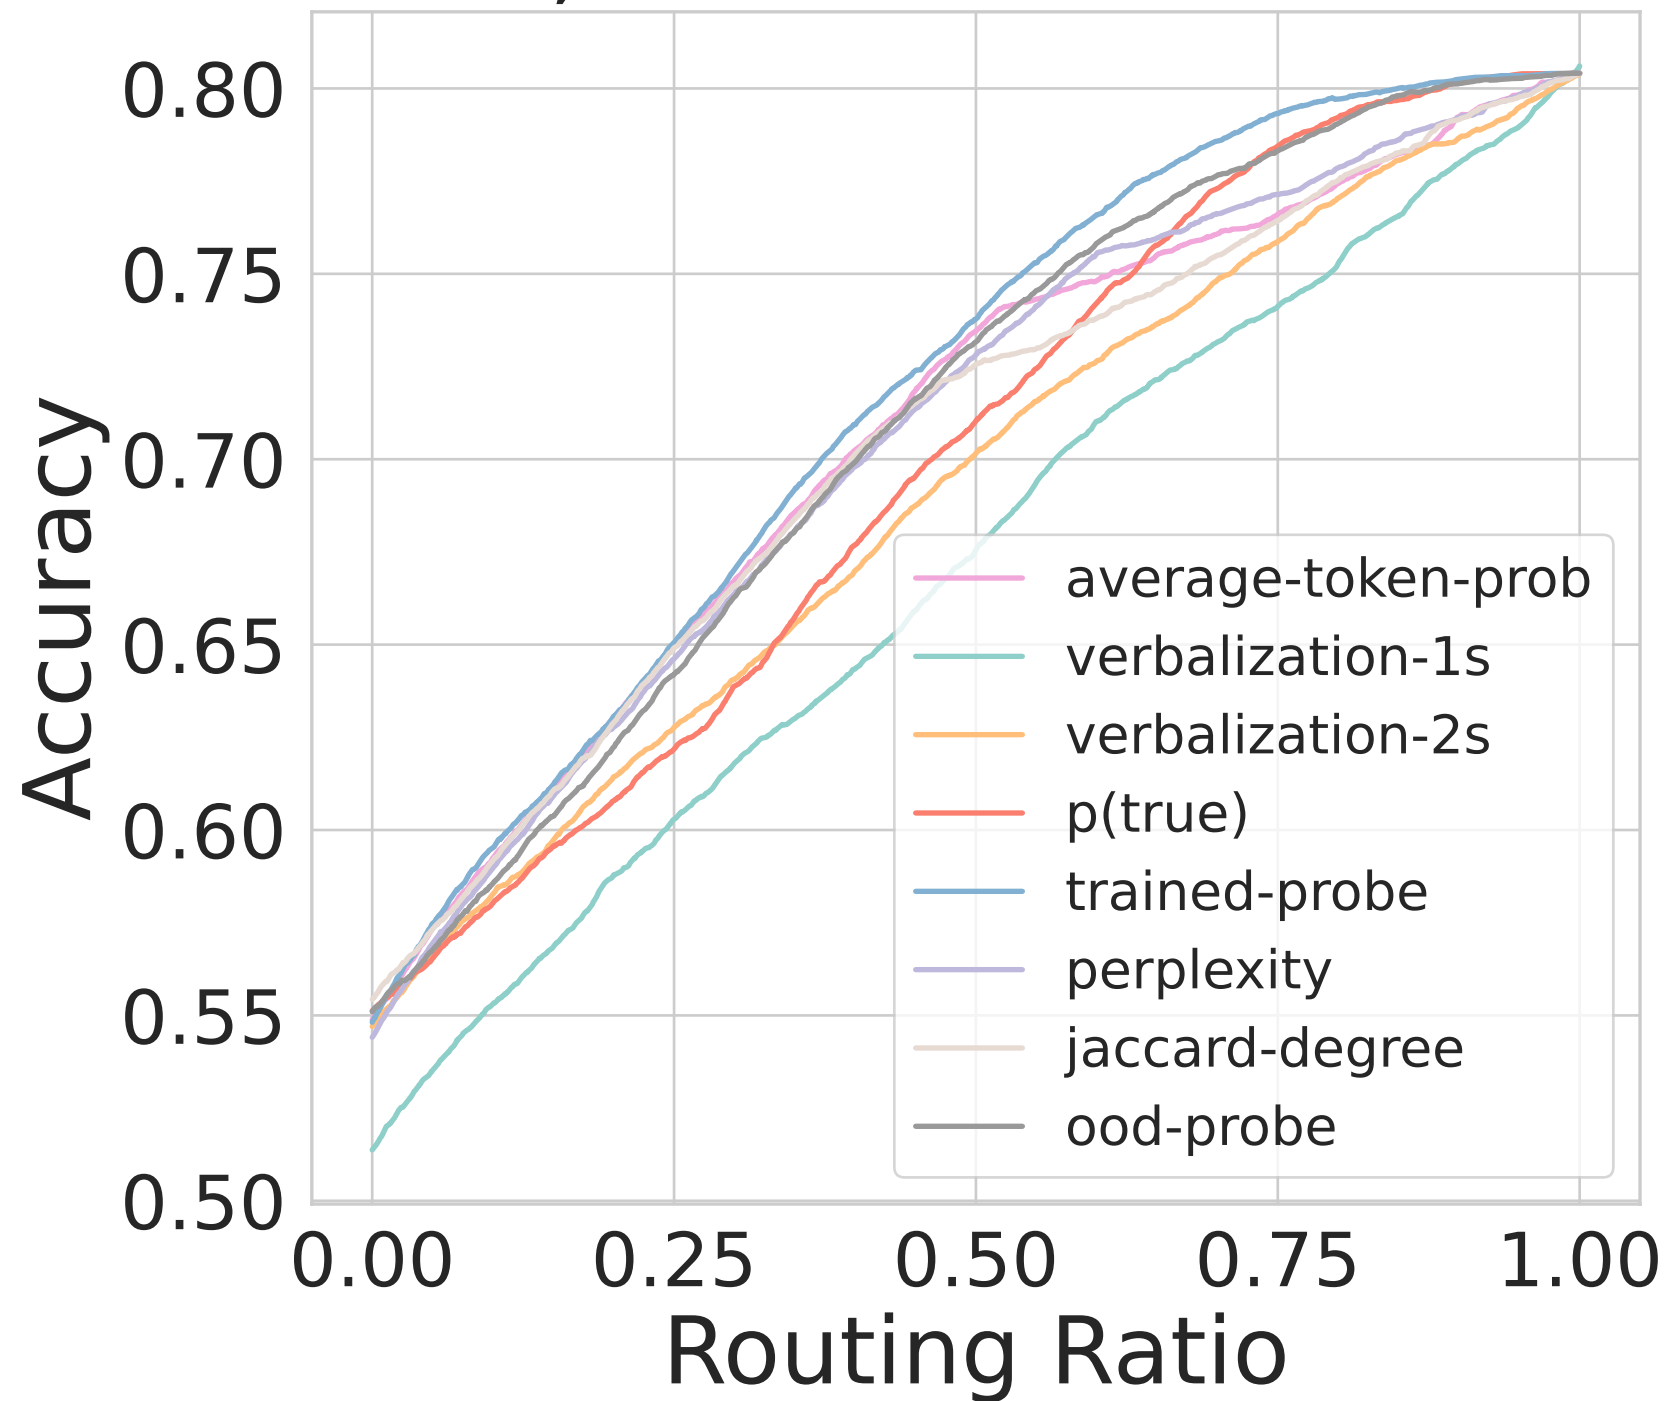

Supplement: supplementary_material [file rr_acc_mmlu_llama-3.2-3b_llama70.pdf › Routing_SLM_LLMs/Uncertainty-based Routing/w_legend/to_llama70/rr_acc_mmlu_llama-3.2-3b_llama70.pdf]

**MMLU, mistral-7b to Llama-3.1-70B**

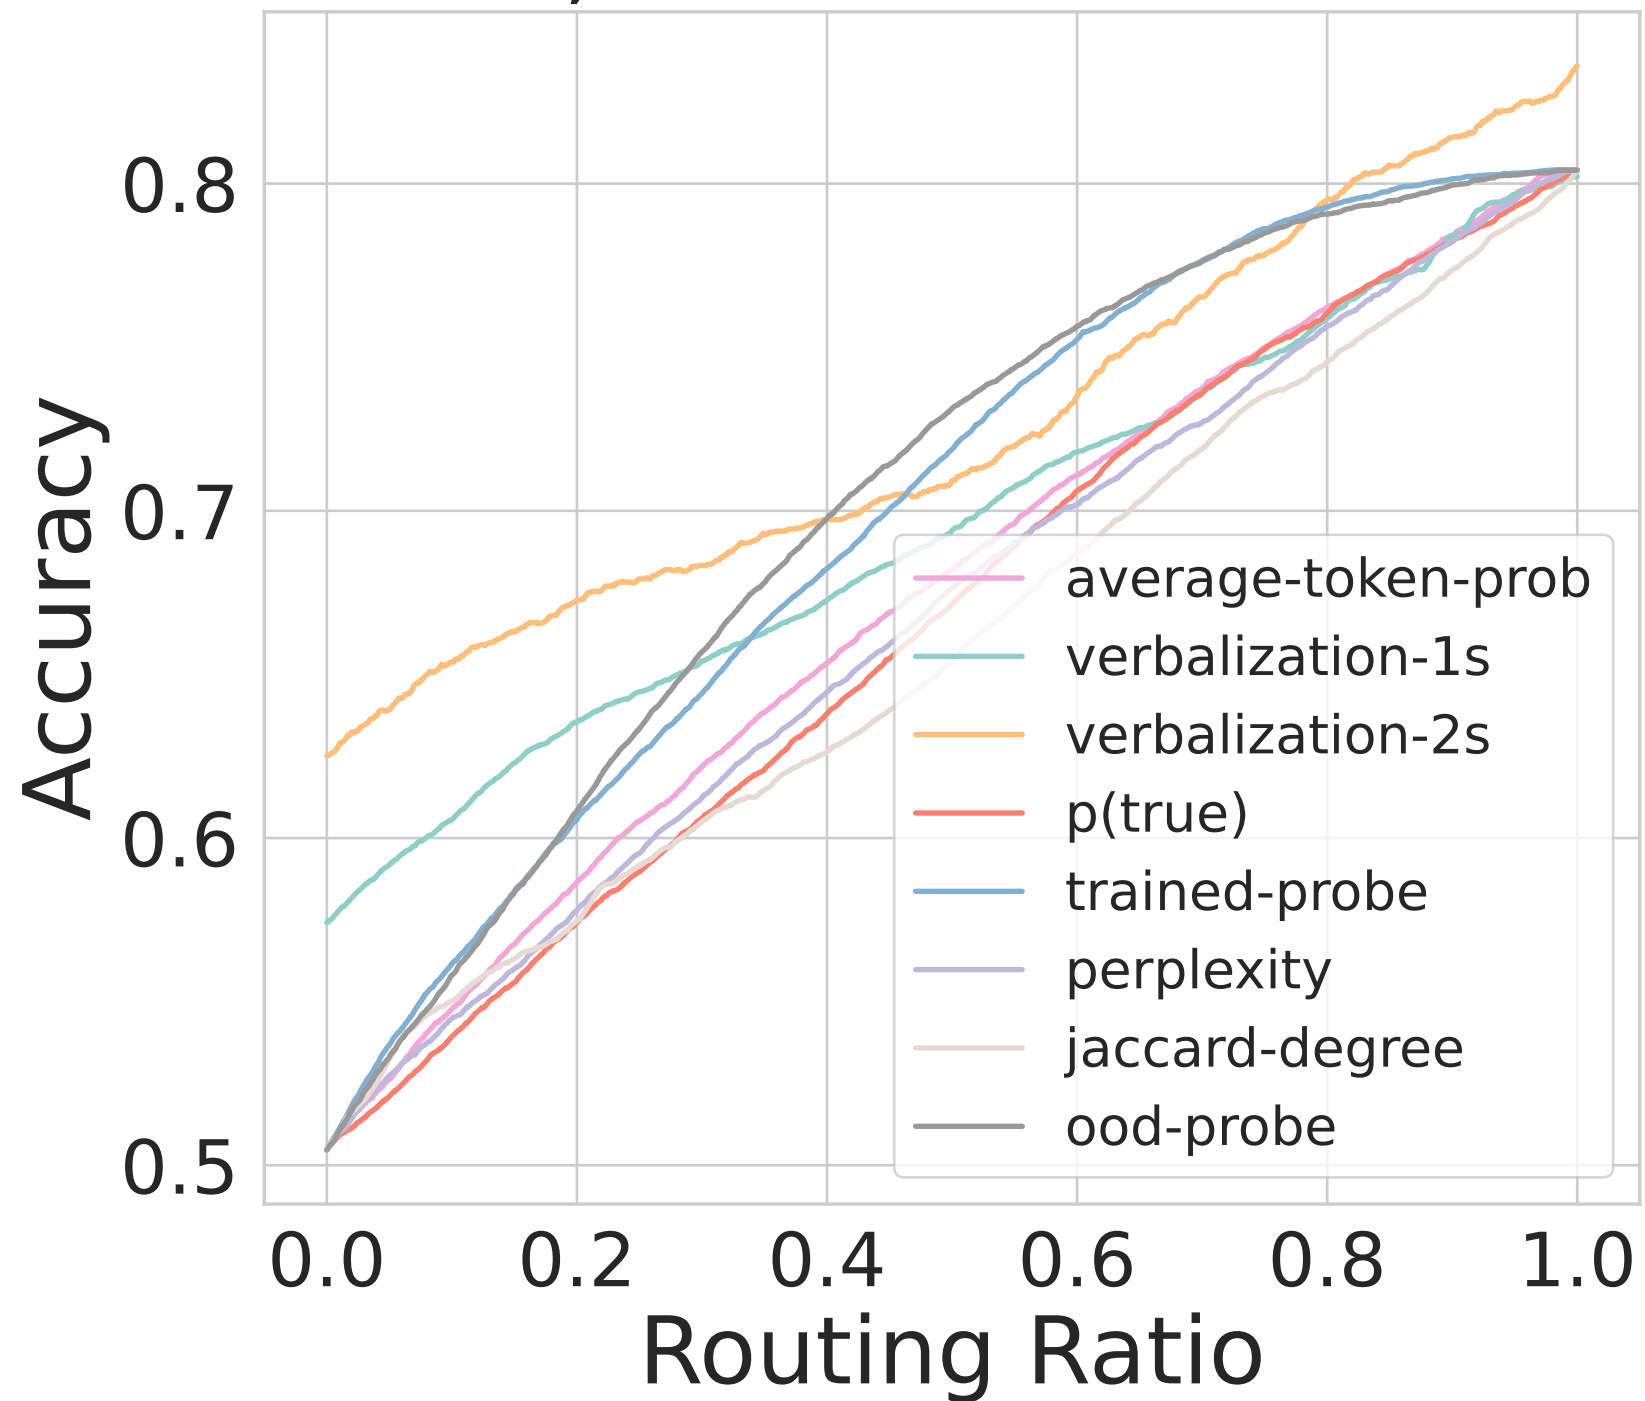

Supplement: supplementary_material [file rr_acc_mmlu_mistral-7b_llama70.pdf › Routing_SLM_LLMs/Uncertainty-based Routing/w_legend/to_llama70/rr_acc_mmlu_mistral-7b_llama70.pdf]

# MMLU, phi-3.5-mini to Llama-3.1-70B

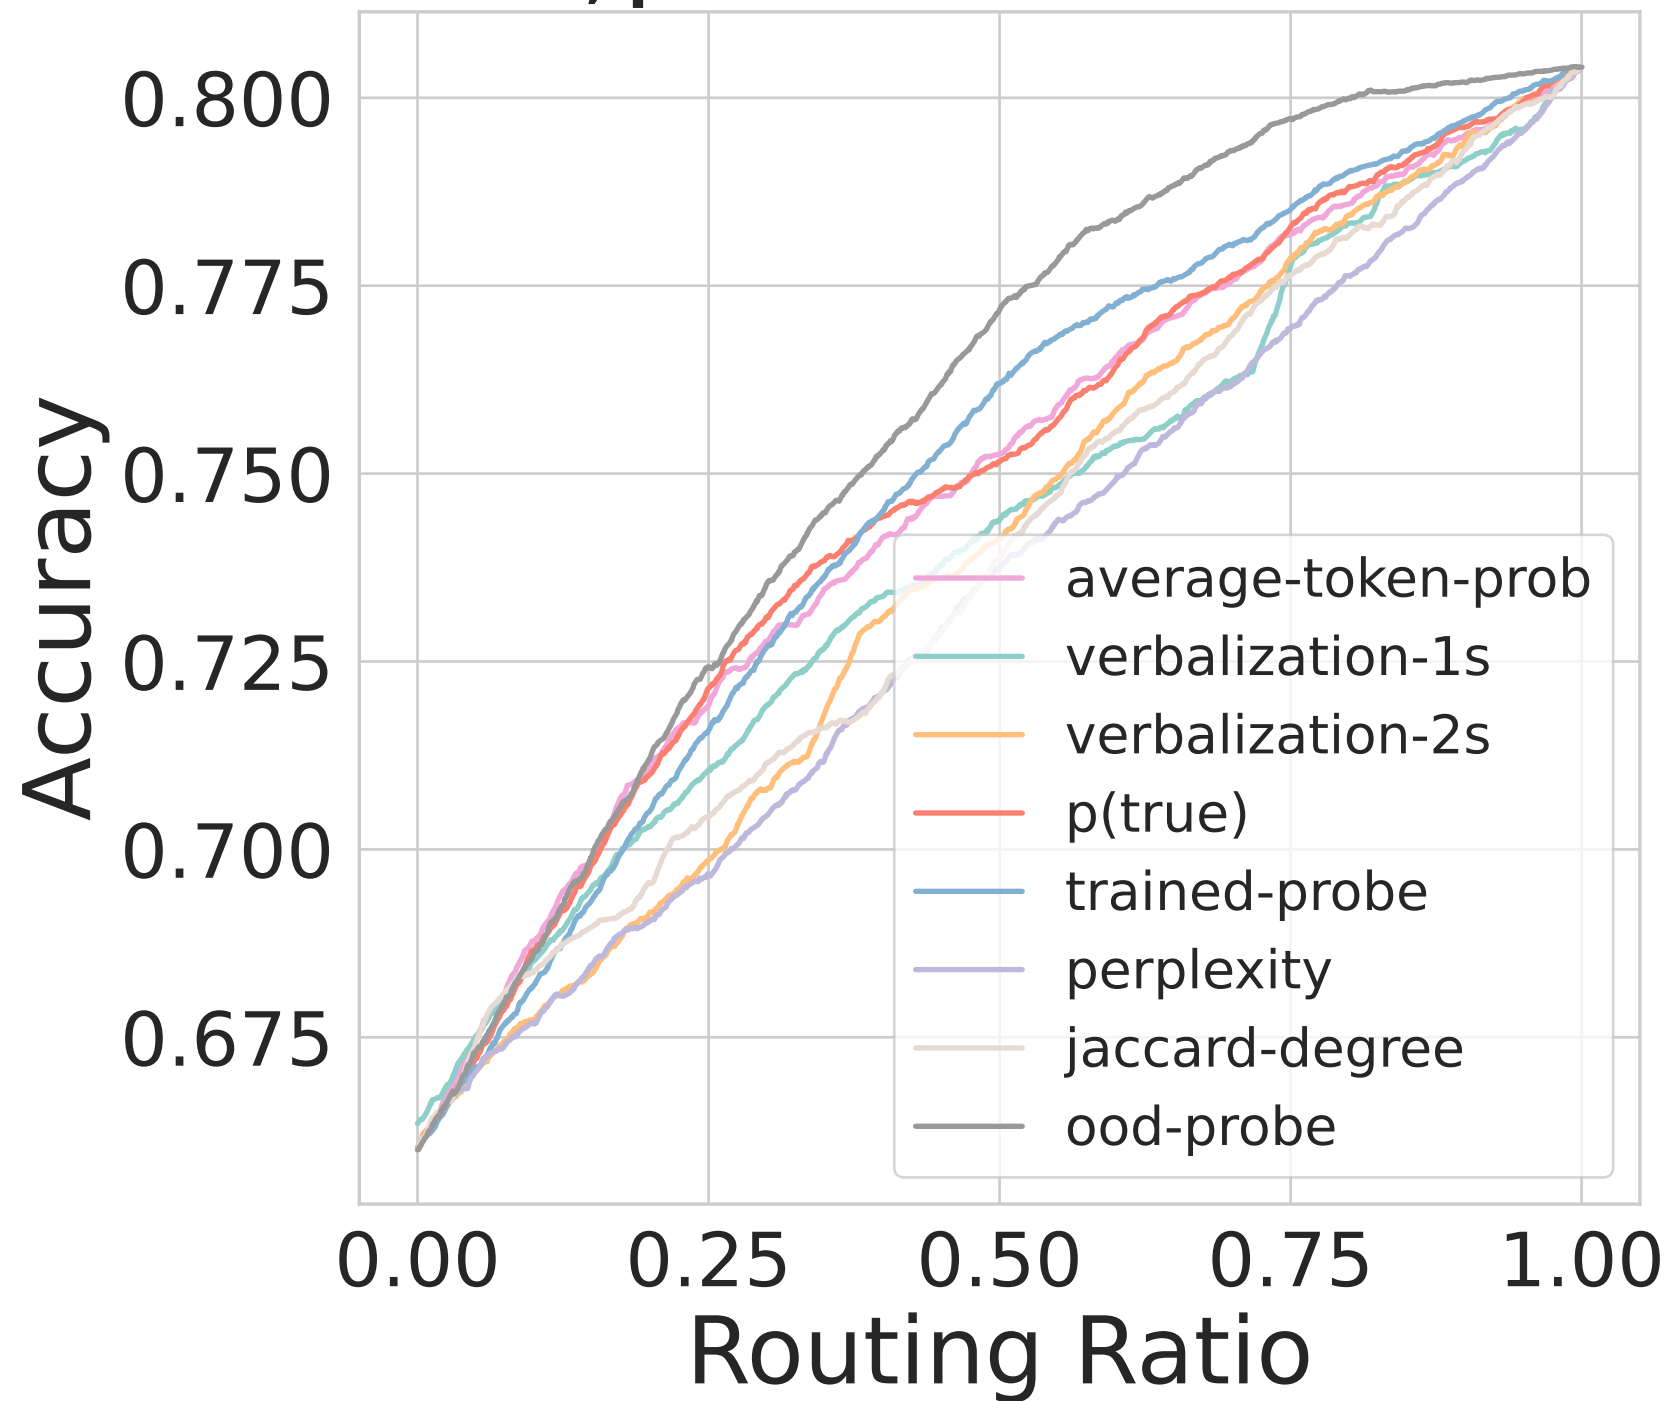

Supplement: supplementary_material [file rr_acc_mmlu_phi-3.5-mini_llama70.pdf › Routing_SLM_LLMs/Uncertainty-based Routing/w_legend/to_llama70/rr_acc_mmlu_phi-3.5-mini_llama70.pdf]

# MMLU, phi-4-mini-reasoning to Llama-3.1-70B

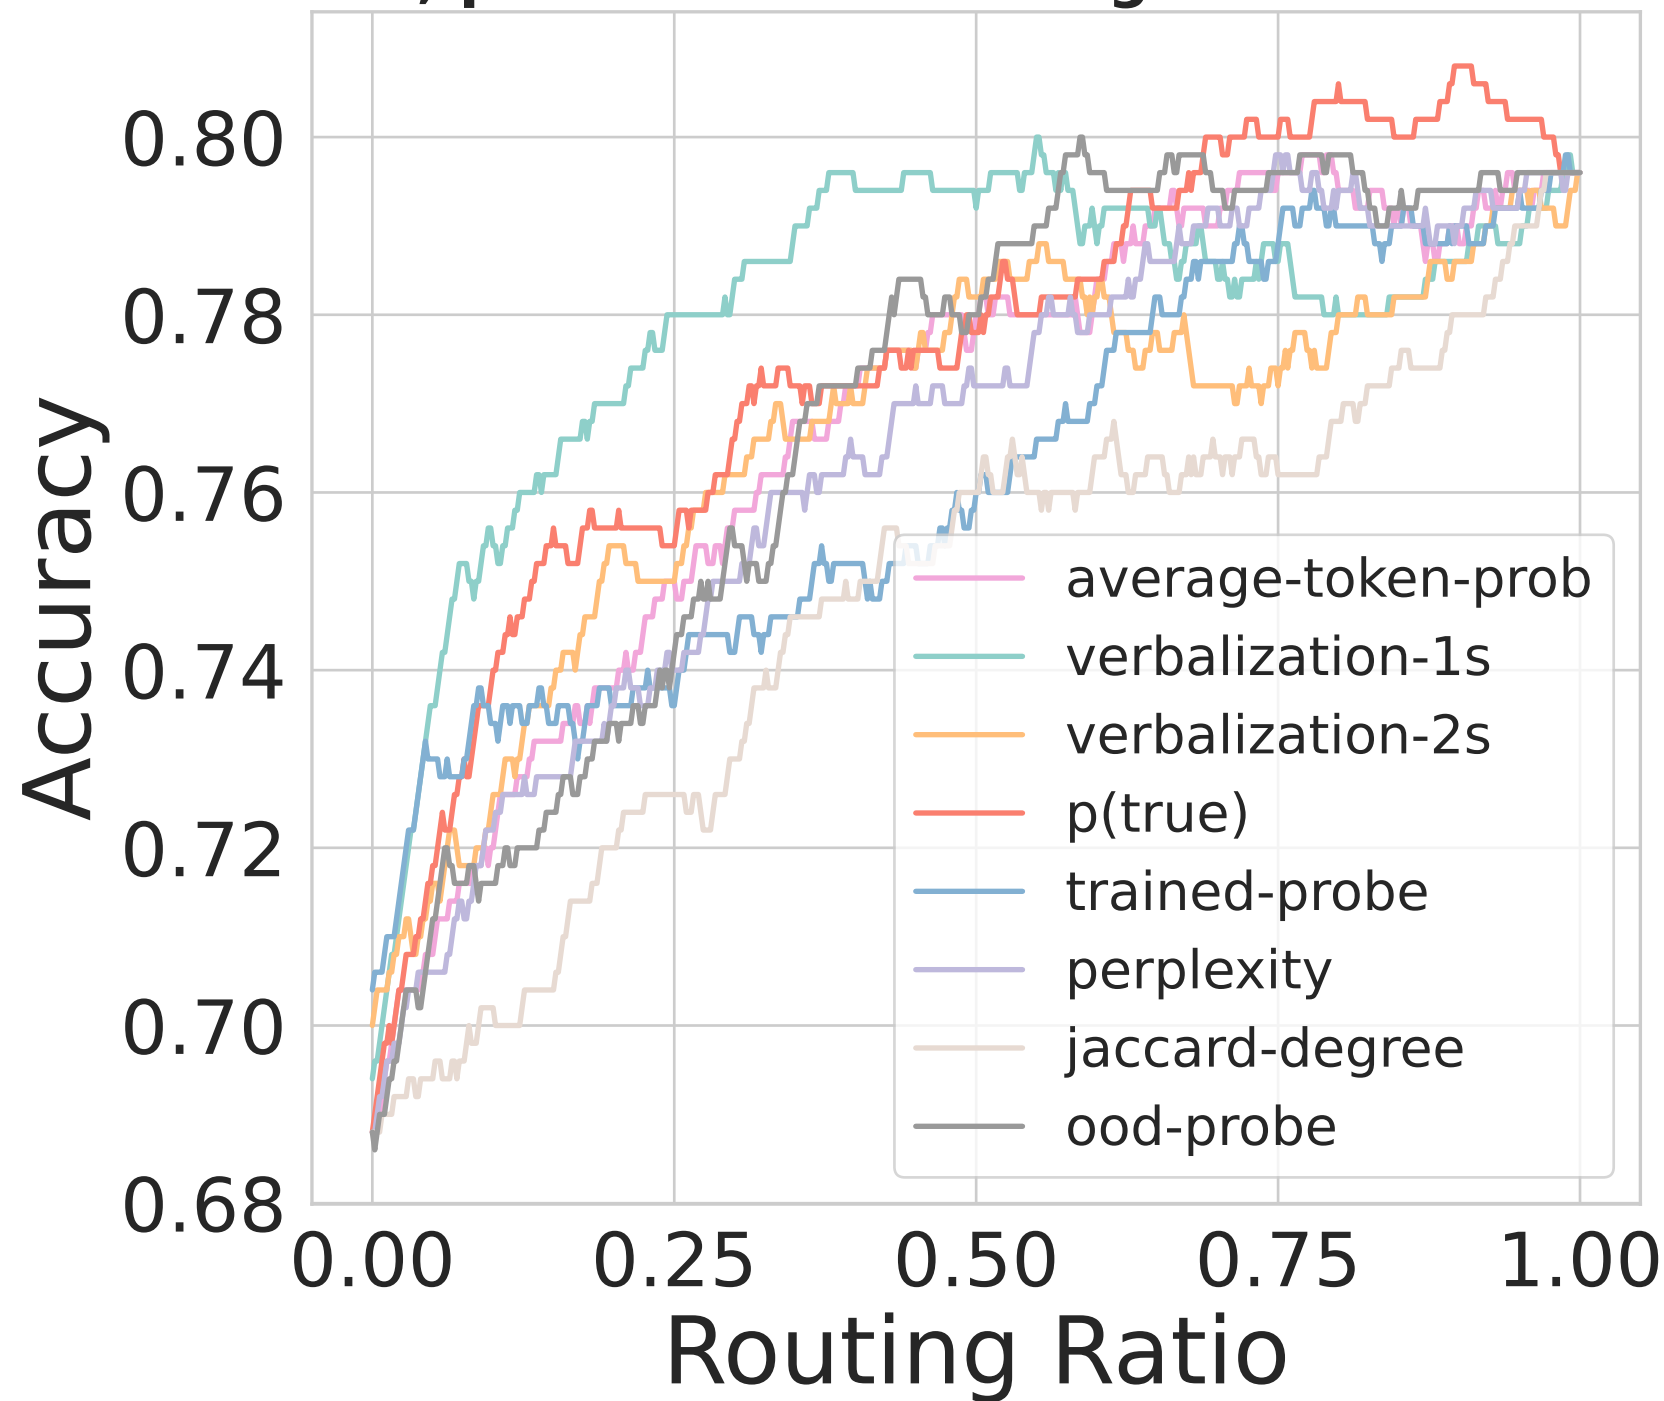

Supplement: supplementary_material [file rr_acc_mmlu_phi-4-mini-reasoning_llama70.pdf › Routing_SLM_LLMs/Uncertainty-based Routing/w_legend/to_llama70/rr_acc_mmlu_phi-4-mini-reasoning_llama70.pdf]

MMLU, qwen-2.5-7b to Llama-3.1-70B

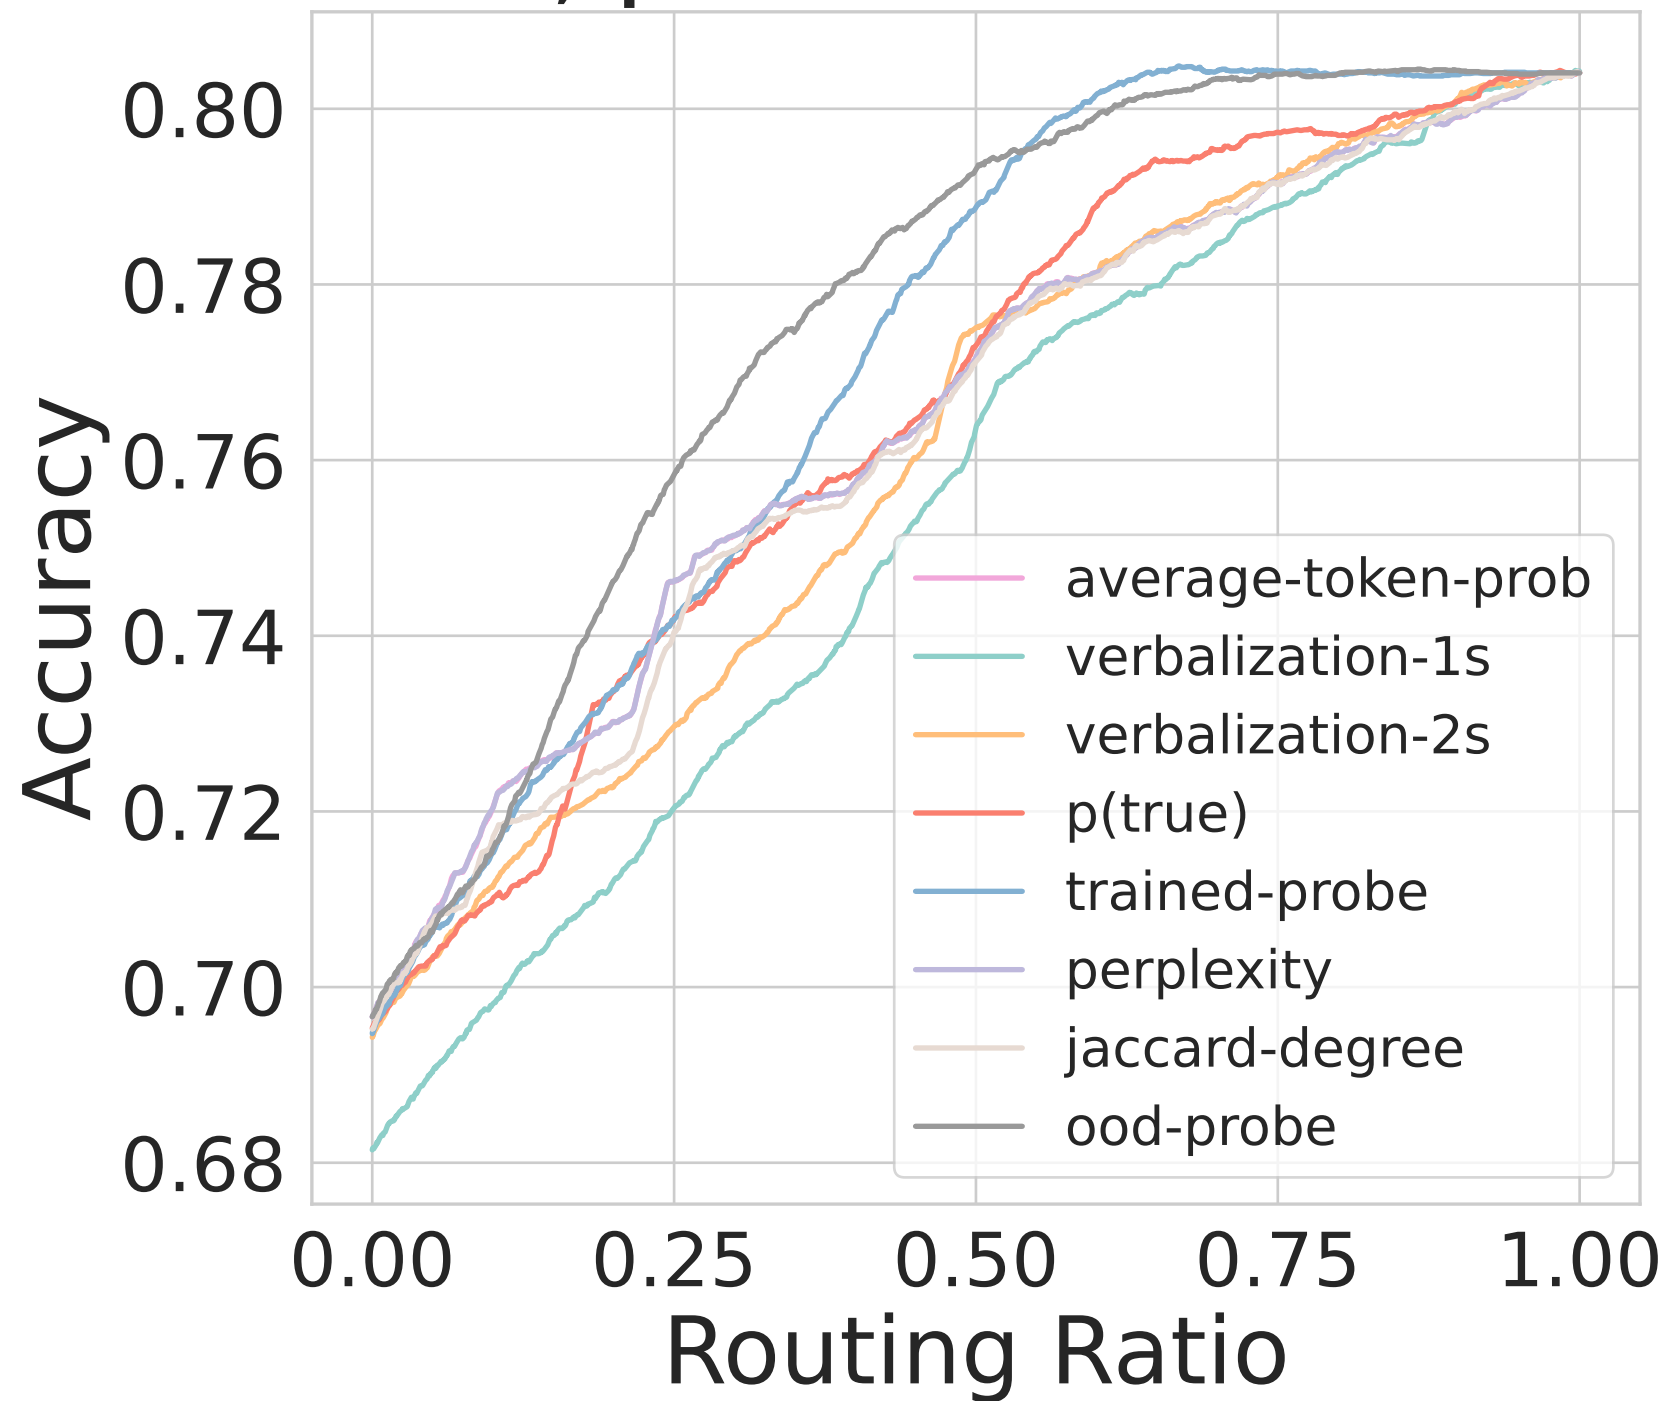

Supplement: supplementary_material [file rr_acc_mmlu_qwen-2.5-7b_llama70.pdf › Routing_SLM_LLMs/Uncertainty-based Routing/w_legend/to_llama70/rr_acc_mmlu_qwen-2.5-7b_llama70.pdf]

# MMLU, rwkv to Llama-3.1-70B

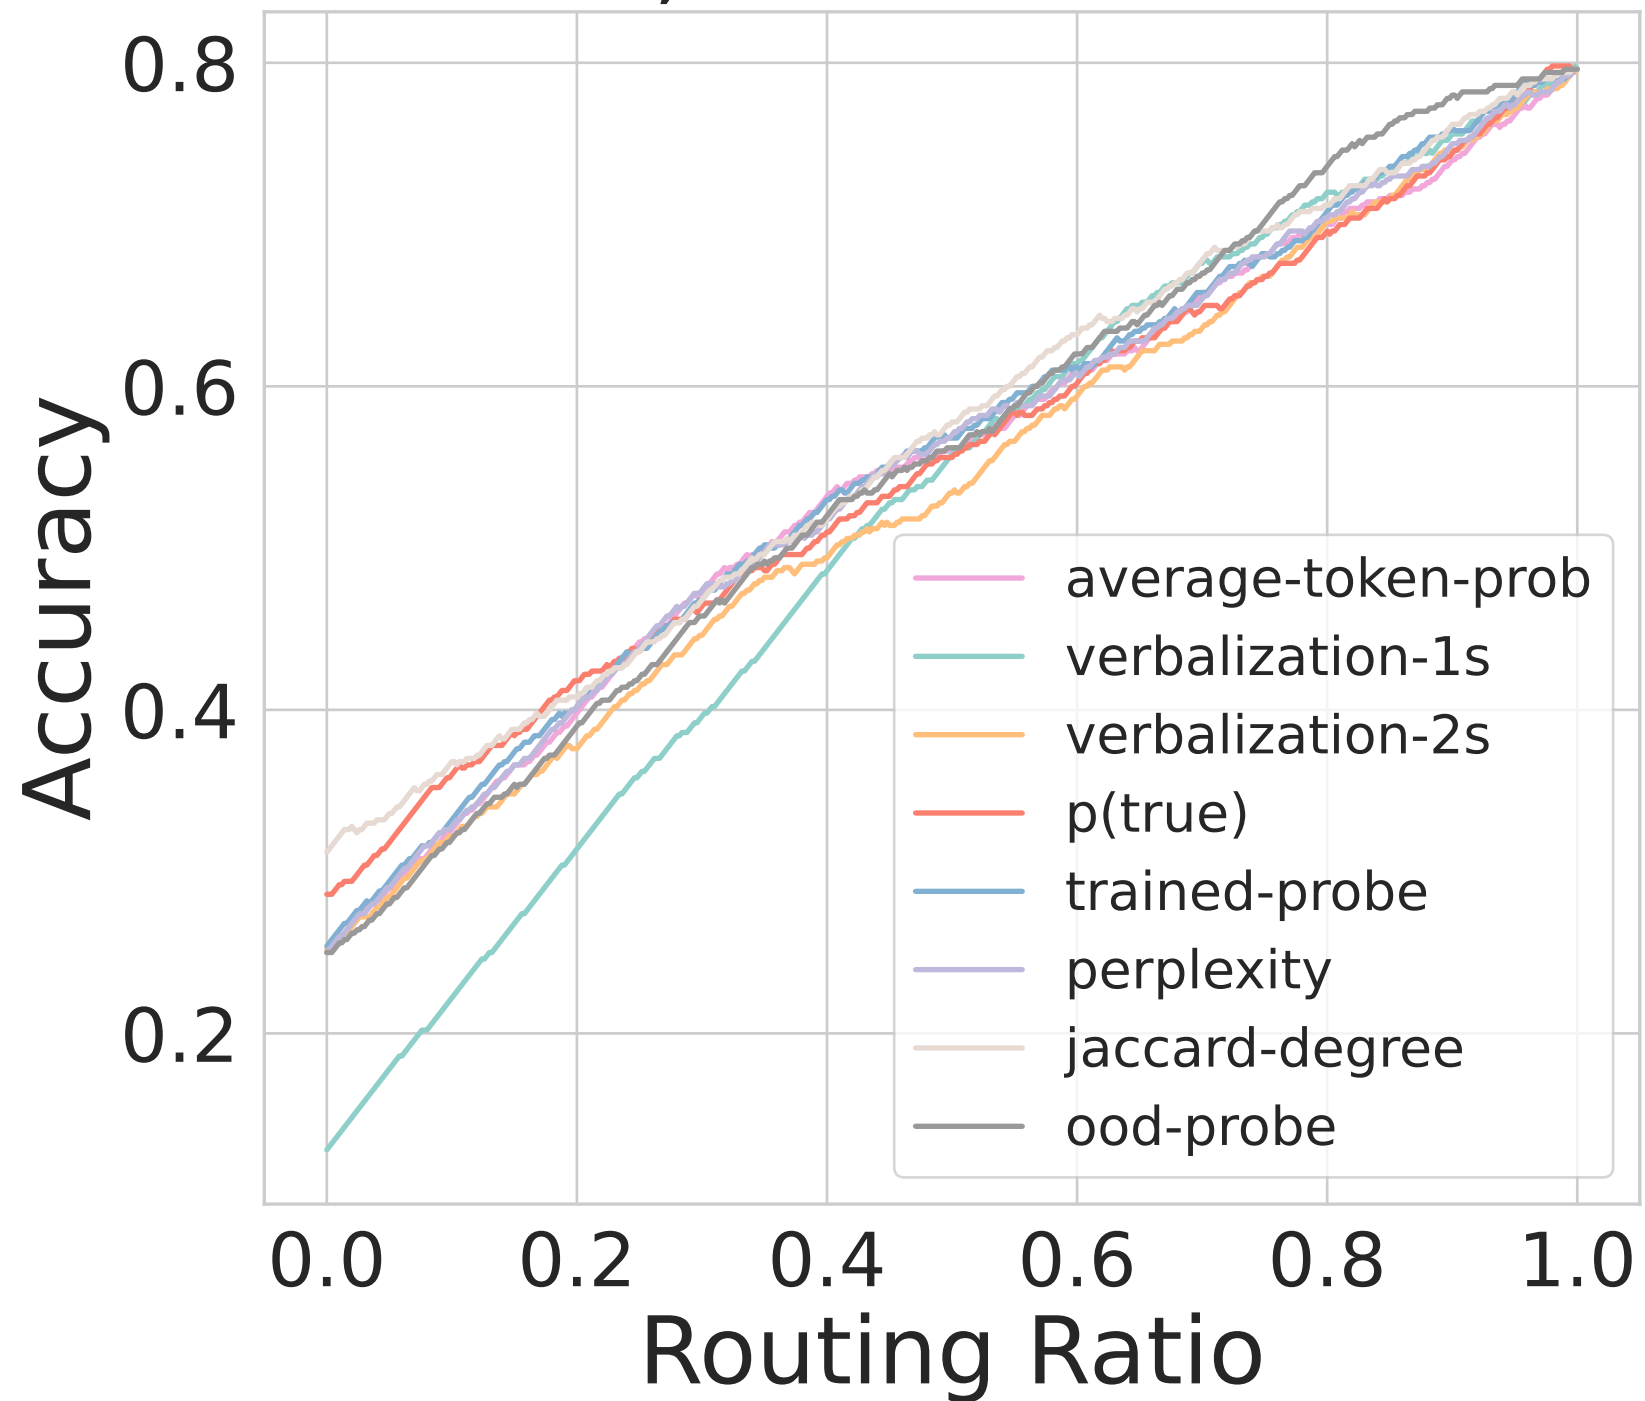

Supplement: supplementary_material [file rr_acc_mmlu_rwkv_llama70.pdf › Routing_SLM_LLMs/Uncertainty-based Routing/w_legend/to_llama70/rr_acc_mmlu_rwkv_llama70.pdf]

# MultiArith, Qwen3-0.6B to Llama-3.1-70B

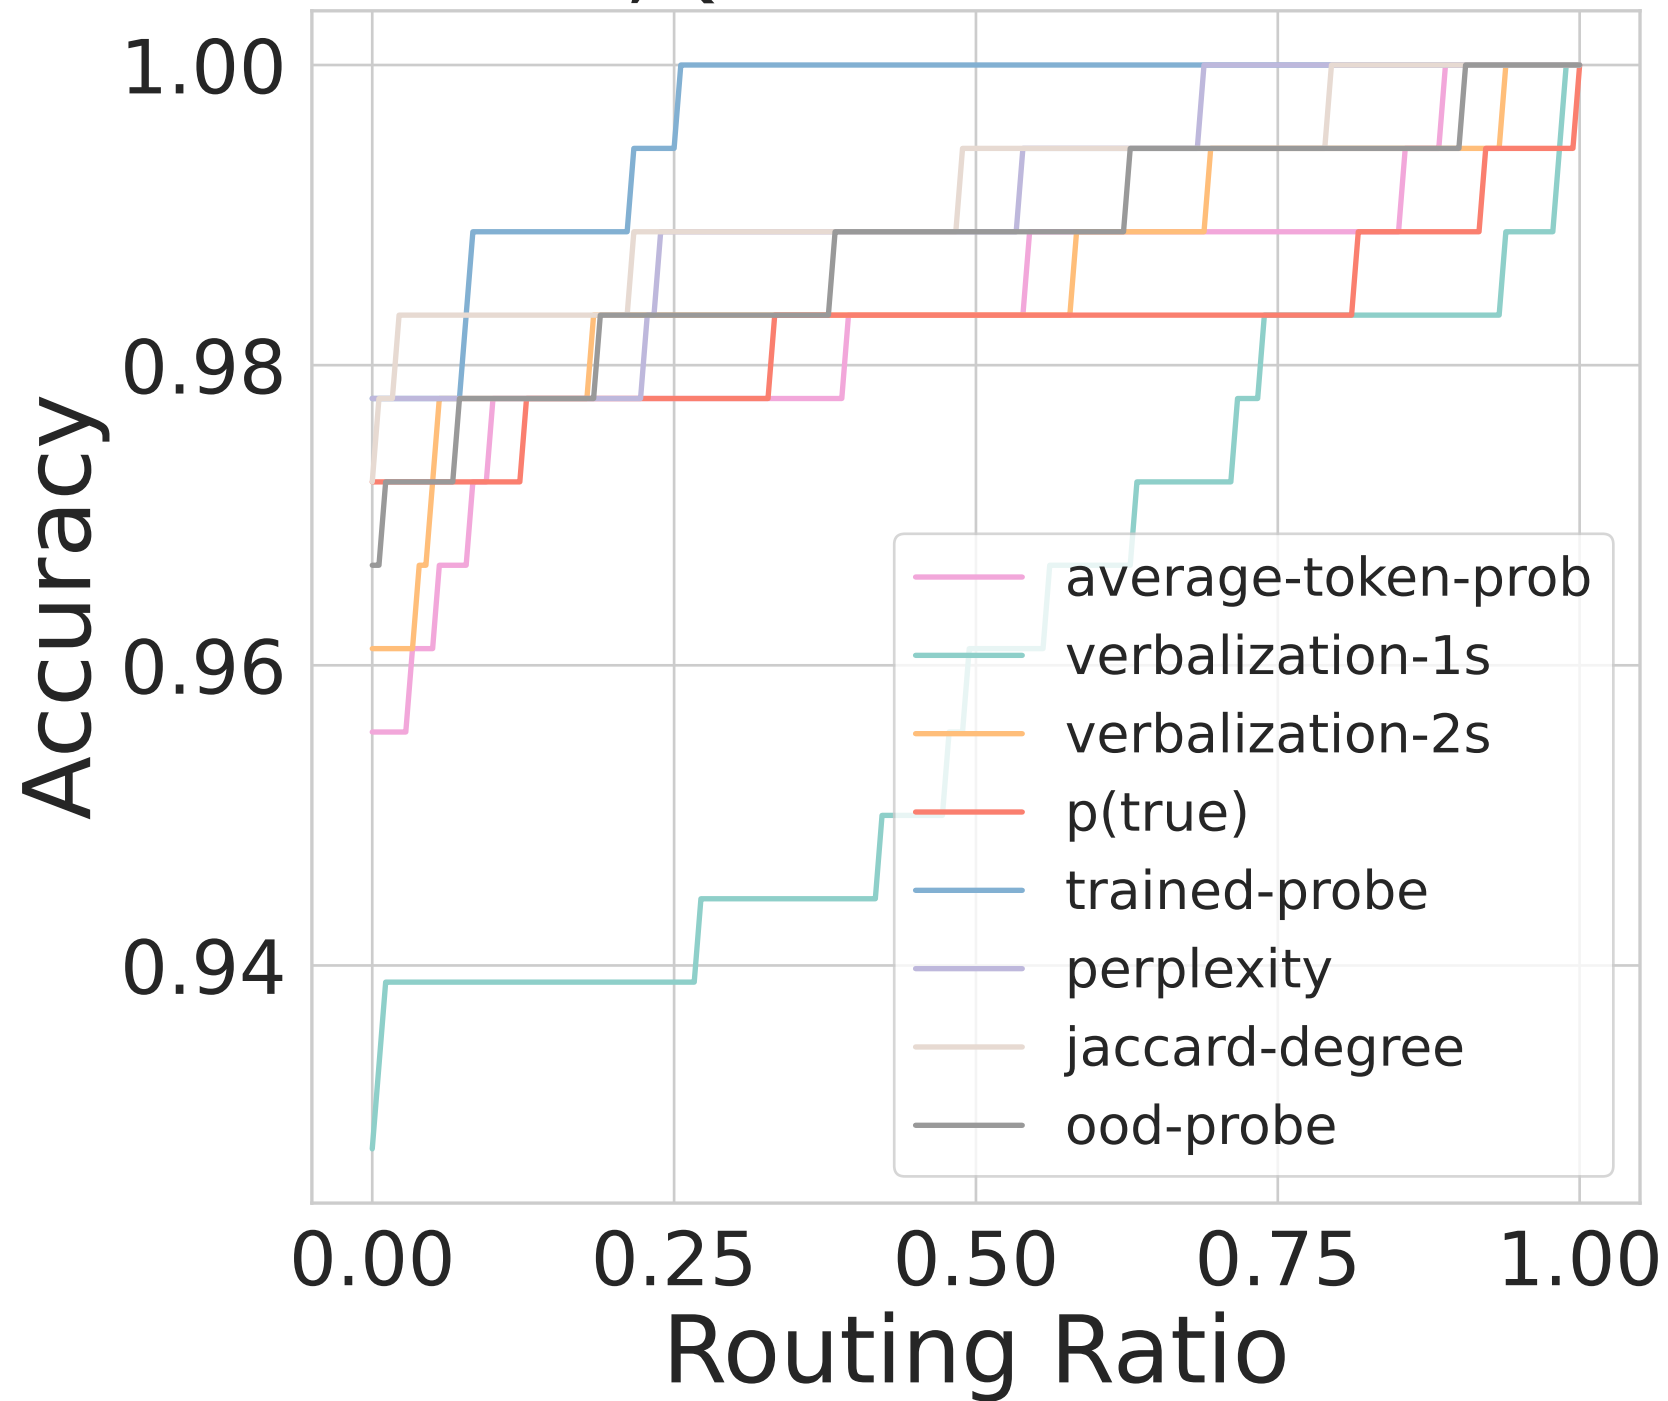

Supplement: supplementary_material [file rr_acc_multiarith_Qwen3-0.6B_llama70.pdf › Routing_SLM_LLMs/Uncertainty-based Routing/w_legend/to_llama70/rr_acc_multiarith_Qwen3-0.6B_llama70.pdf]

**MultiArith, Qwen3-1.7B to Llama-3.1-70B**

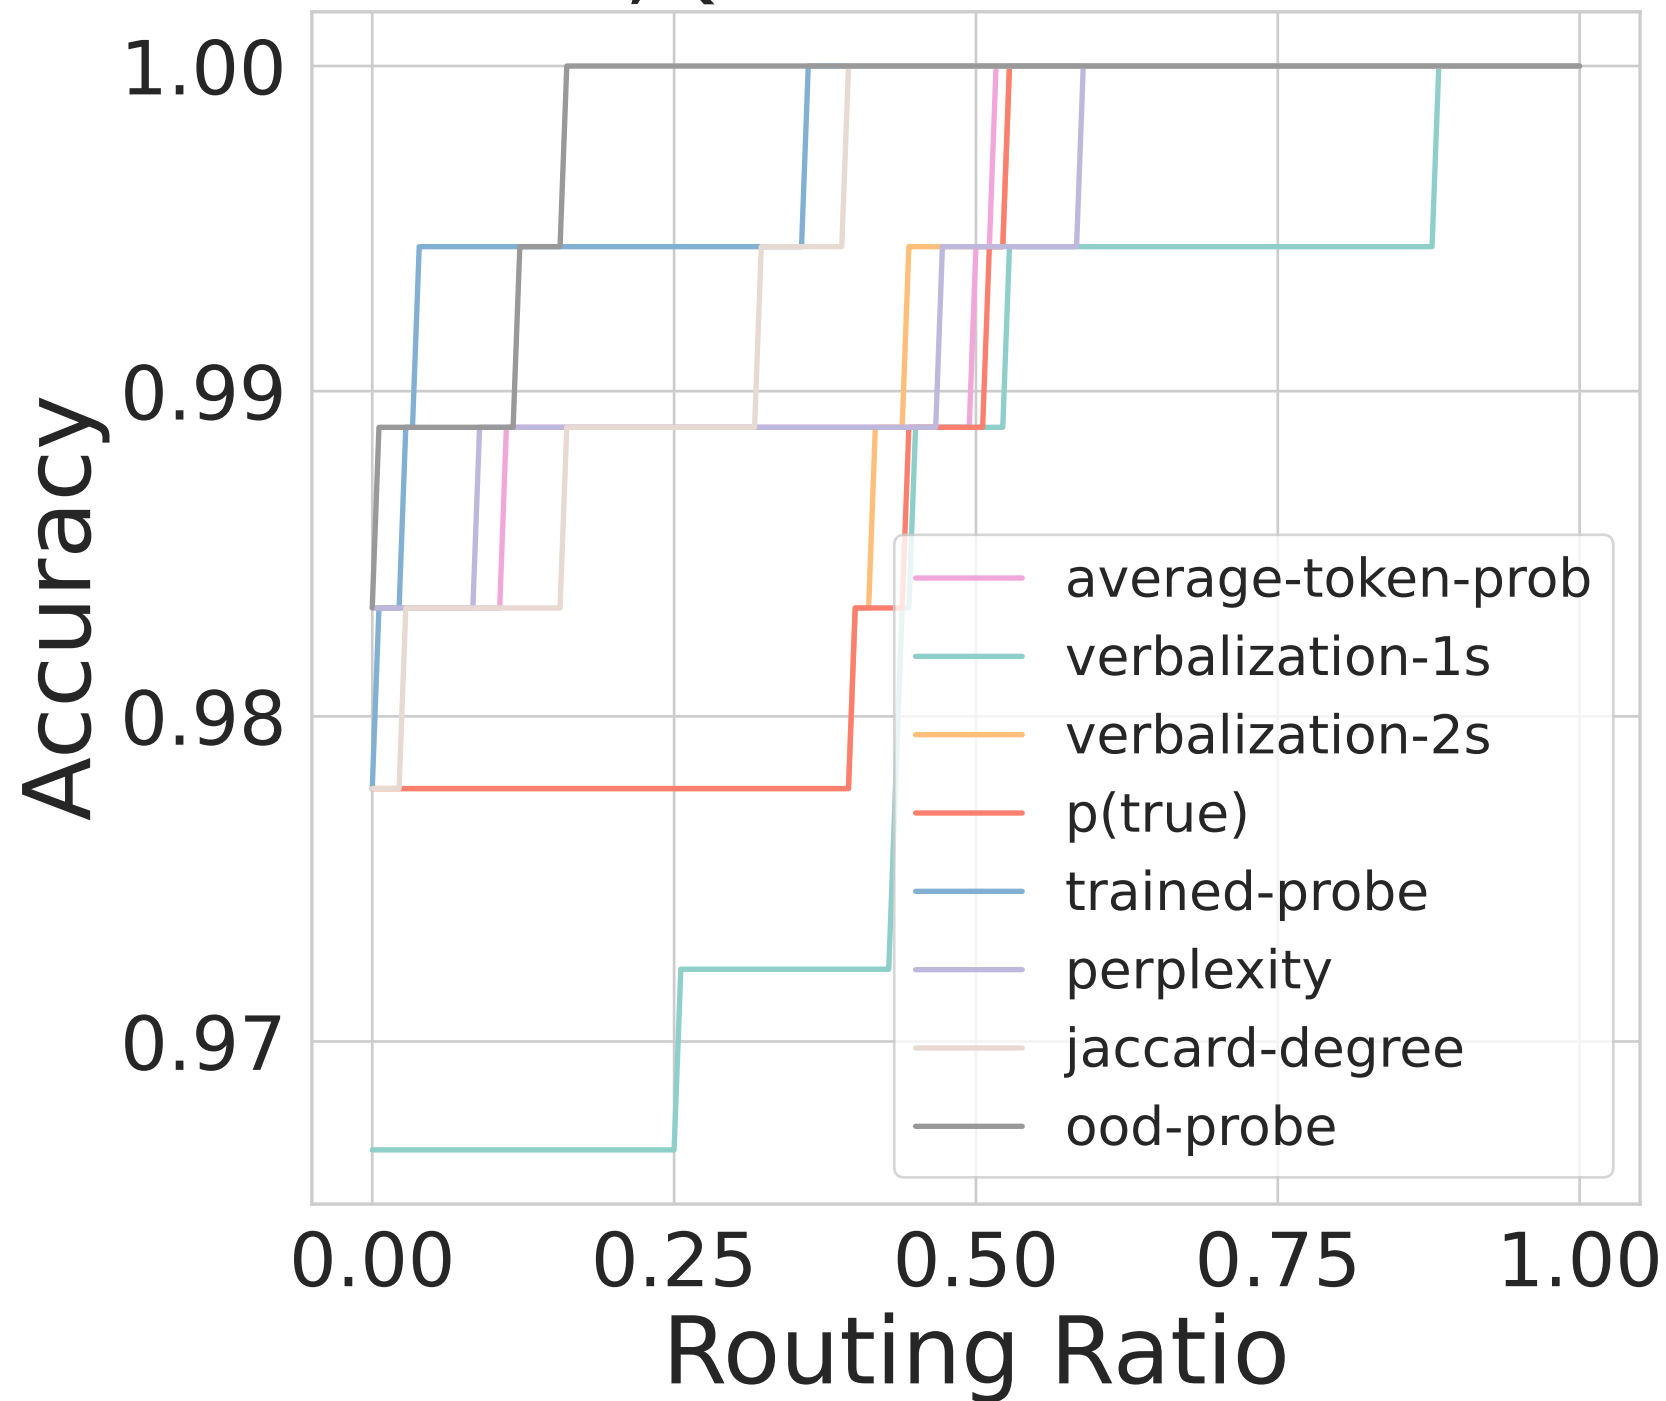

Supplement: supplementary_material [file rr_acc_multiarith_Qwen3-1.7B_llama70.pdf › Routing_SLM_LLMs/Uncertainty-based Routing/w_legend/to_llama70/rr_acc_multiarith_Qwen3-1.7B_llama70.pdf]

# MultiArith, Qwen3-4B to Llama-3.1-70B

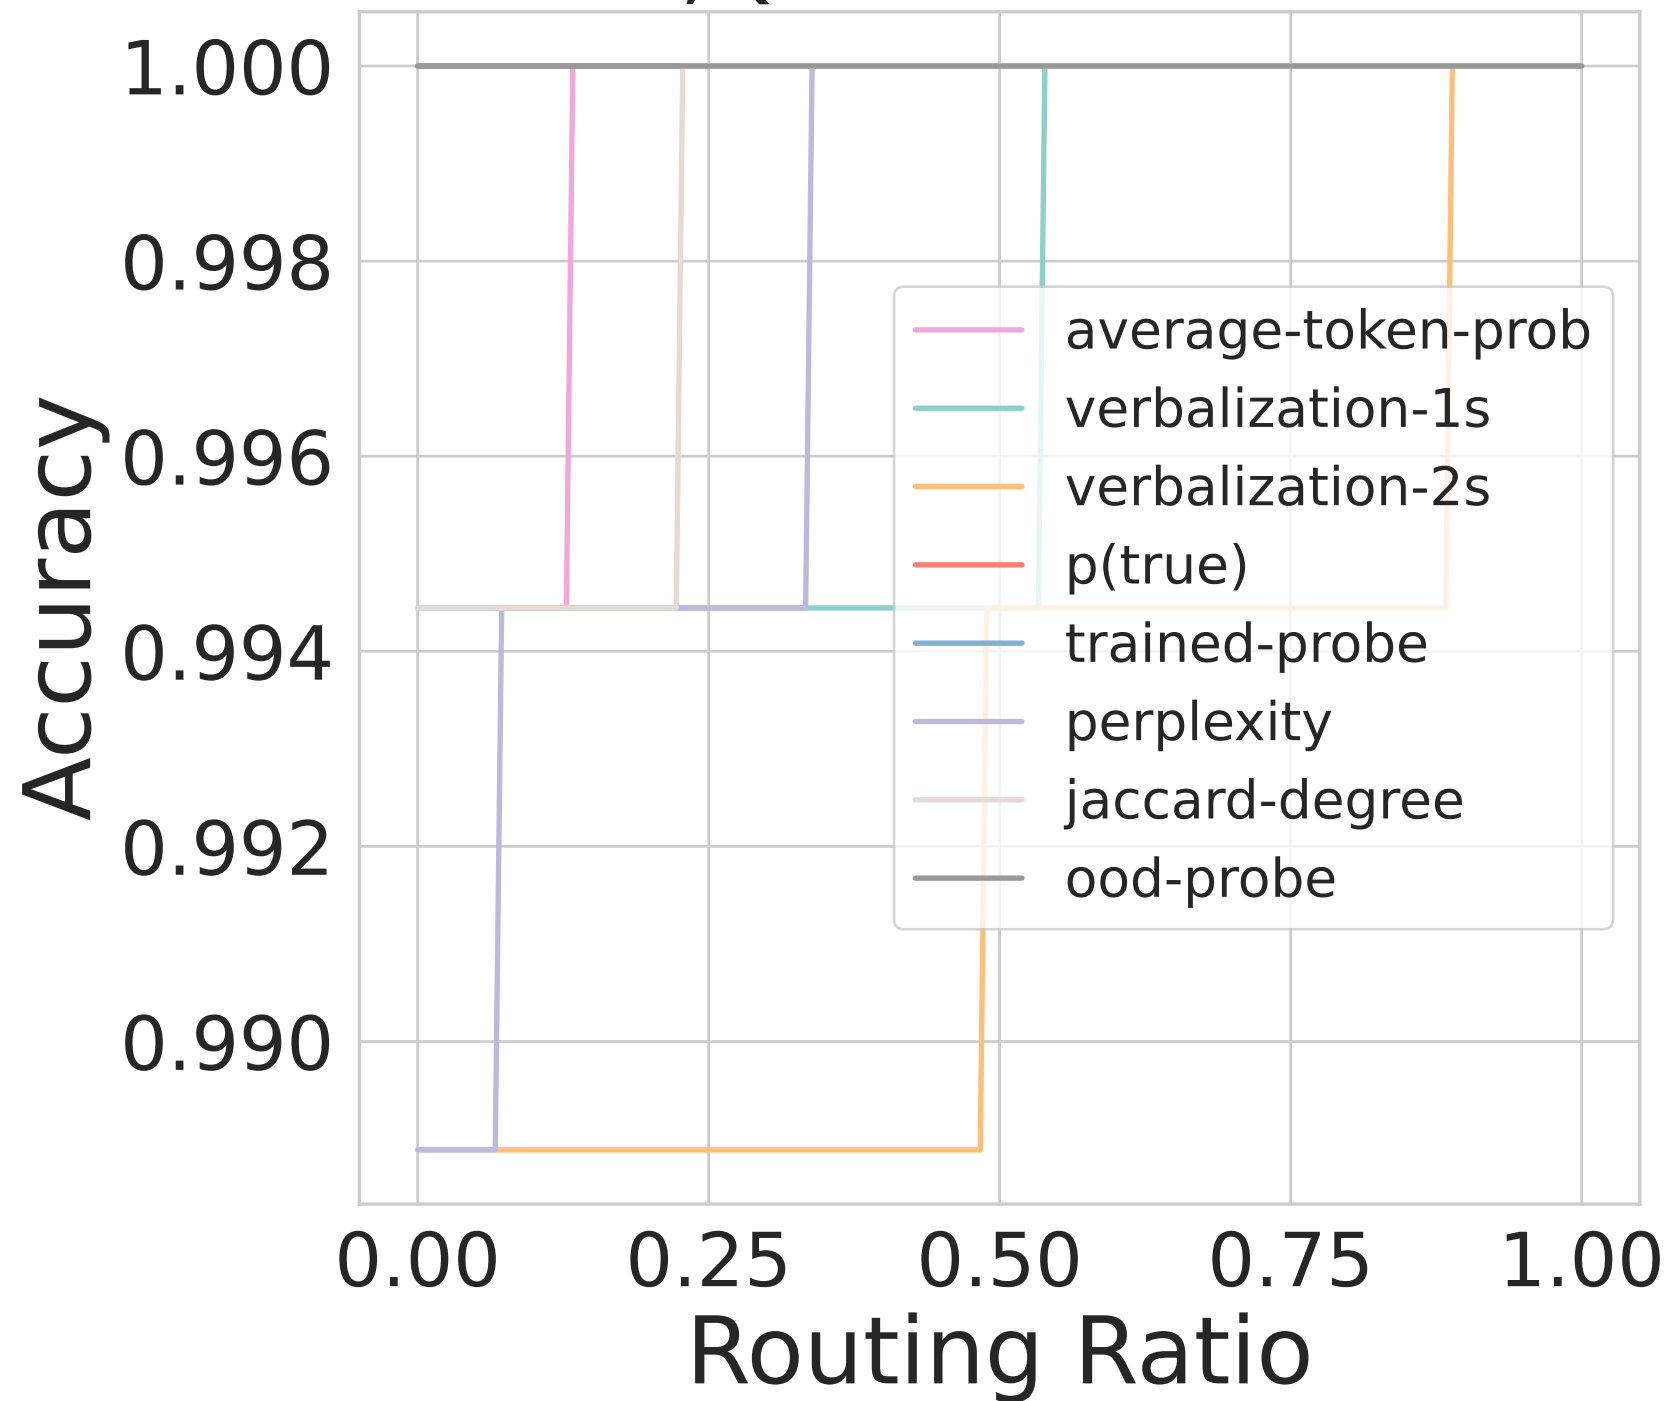

Supplement: supplementary_material [file rr_acc_multiarith_Qwen3-4B_llama70.pdf › Routing_SLM_LLMs/Uncertainty-based Routing/w_legend/to_llama70/rr_acc_multiarith_Qwen3-4B_llama70.pdf]

# MultiArith, granite-3.1-8b to Llama-3.1-70B

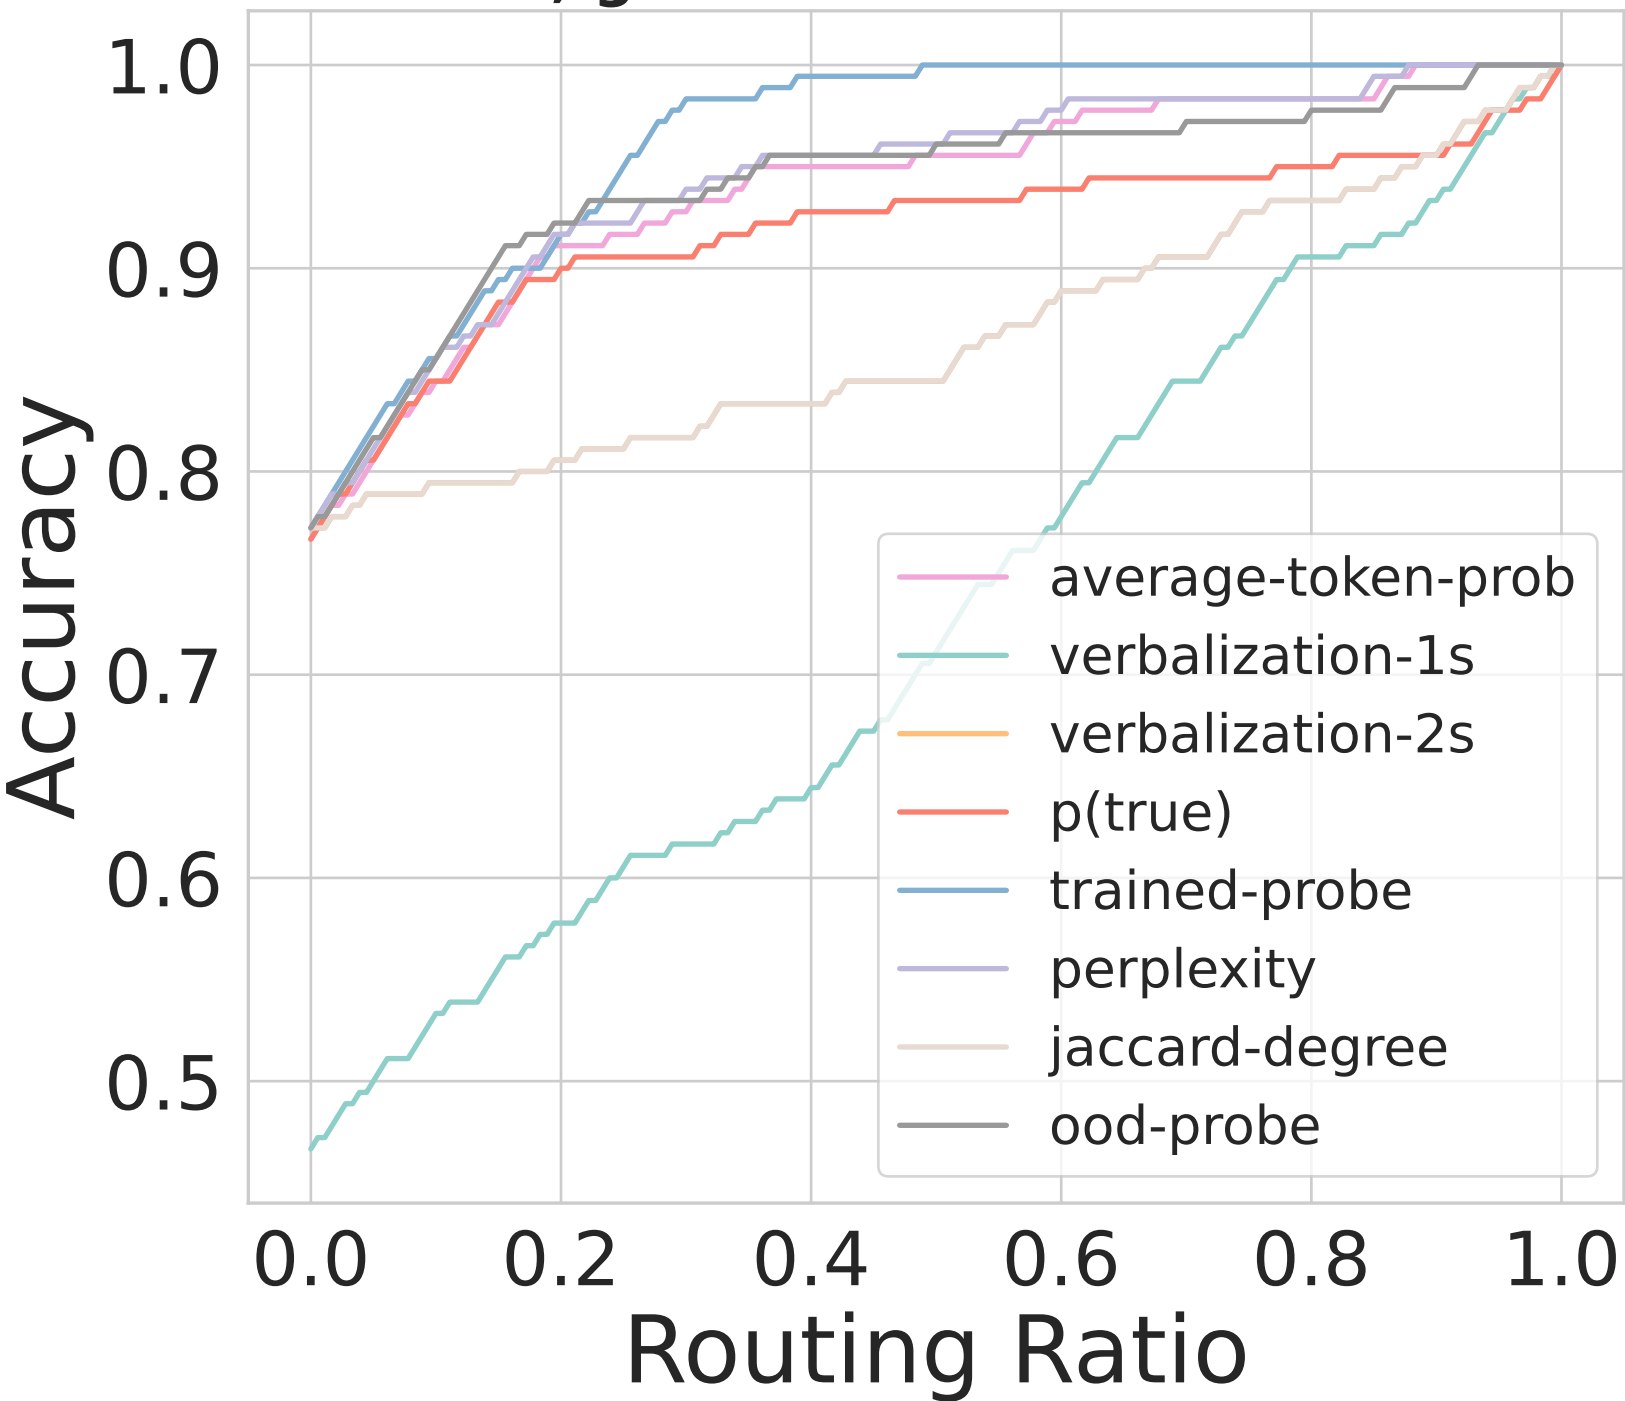

Supplement: supplementary_material [file rr_acc_multiarith_granite-3.1-8b_llama70.pdf › Routing_SLM_LLMs/Uncertainty-based Routing/w_legend/to_llama70/rr_acc_multiarith_granite-3.1-8b_llama70.pdf]

## MultiArith, llama-3.1-8b to Llama-3.1-70B

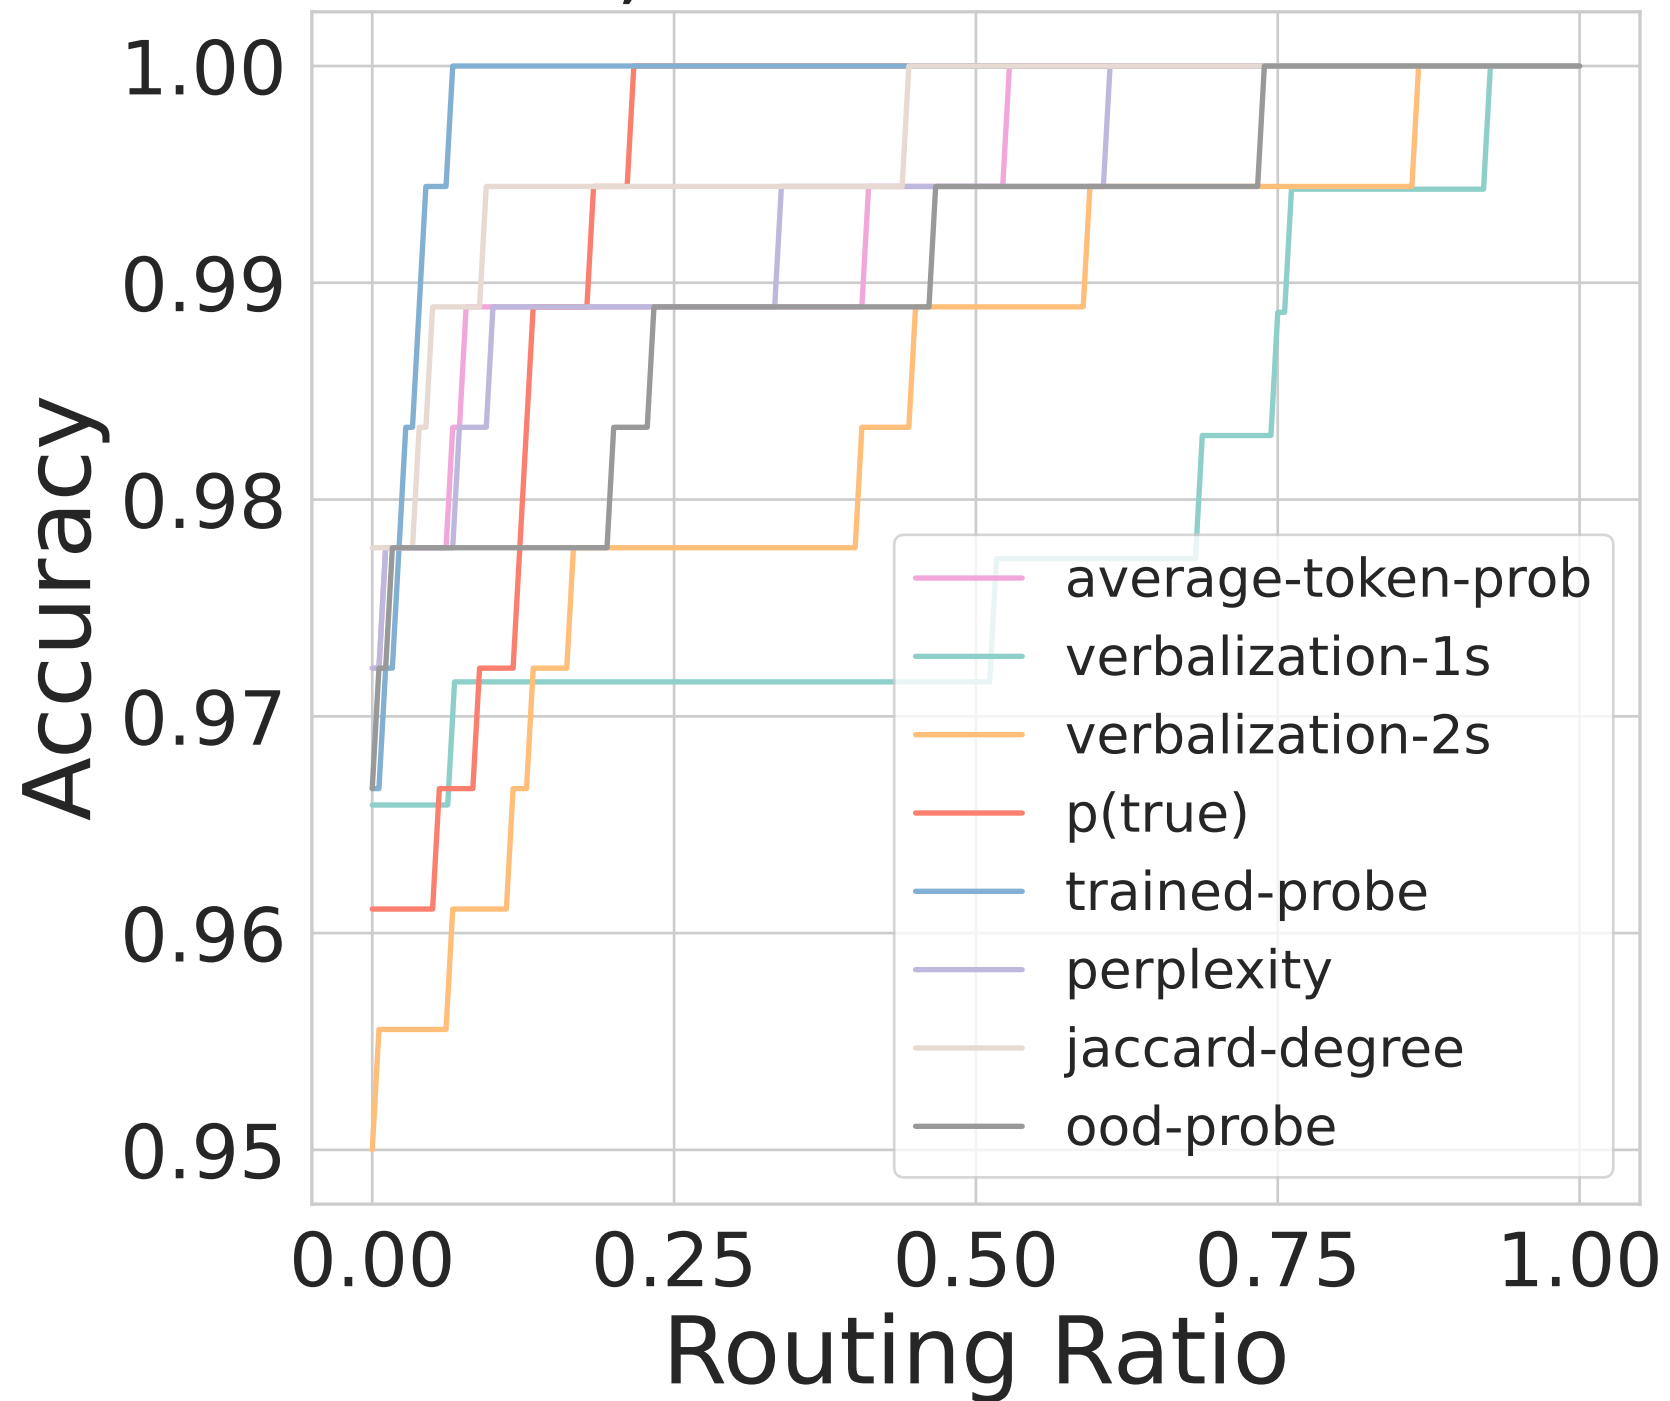

Supplement: supplementary_material [file rr_acc_multiarith_llama-3.1-8b_llama70.pdf › Routing_SLM_LLMs/Uncertainty-based Routing/w_legend/to_llama70/rr_acc_multiarith_llama-3.1-8b_llama70.pdf]

# MultiArith, llama-3.2-1b to Llama-3.1-70B

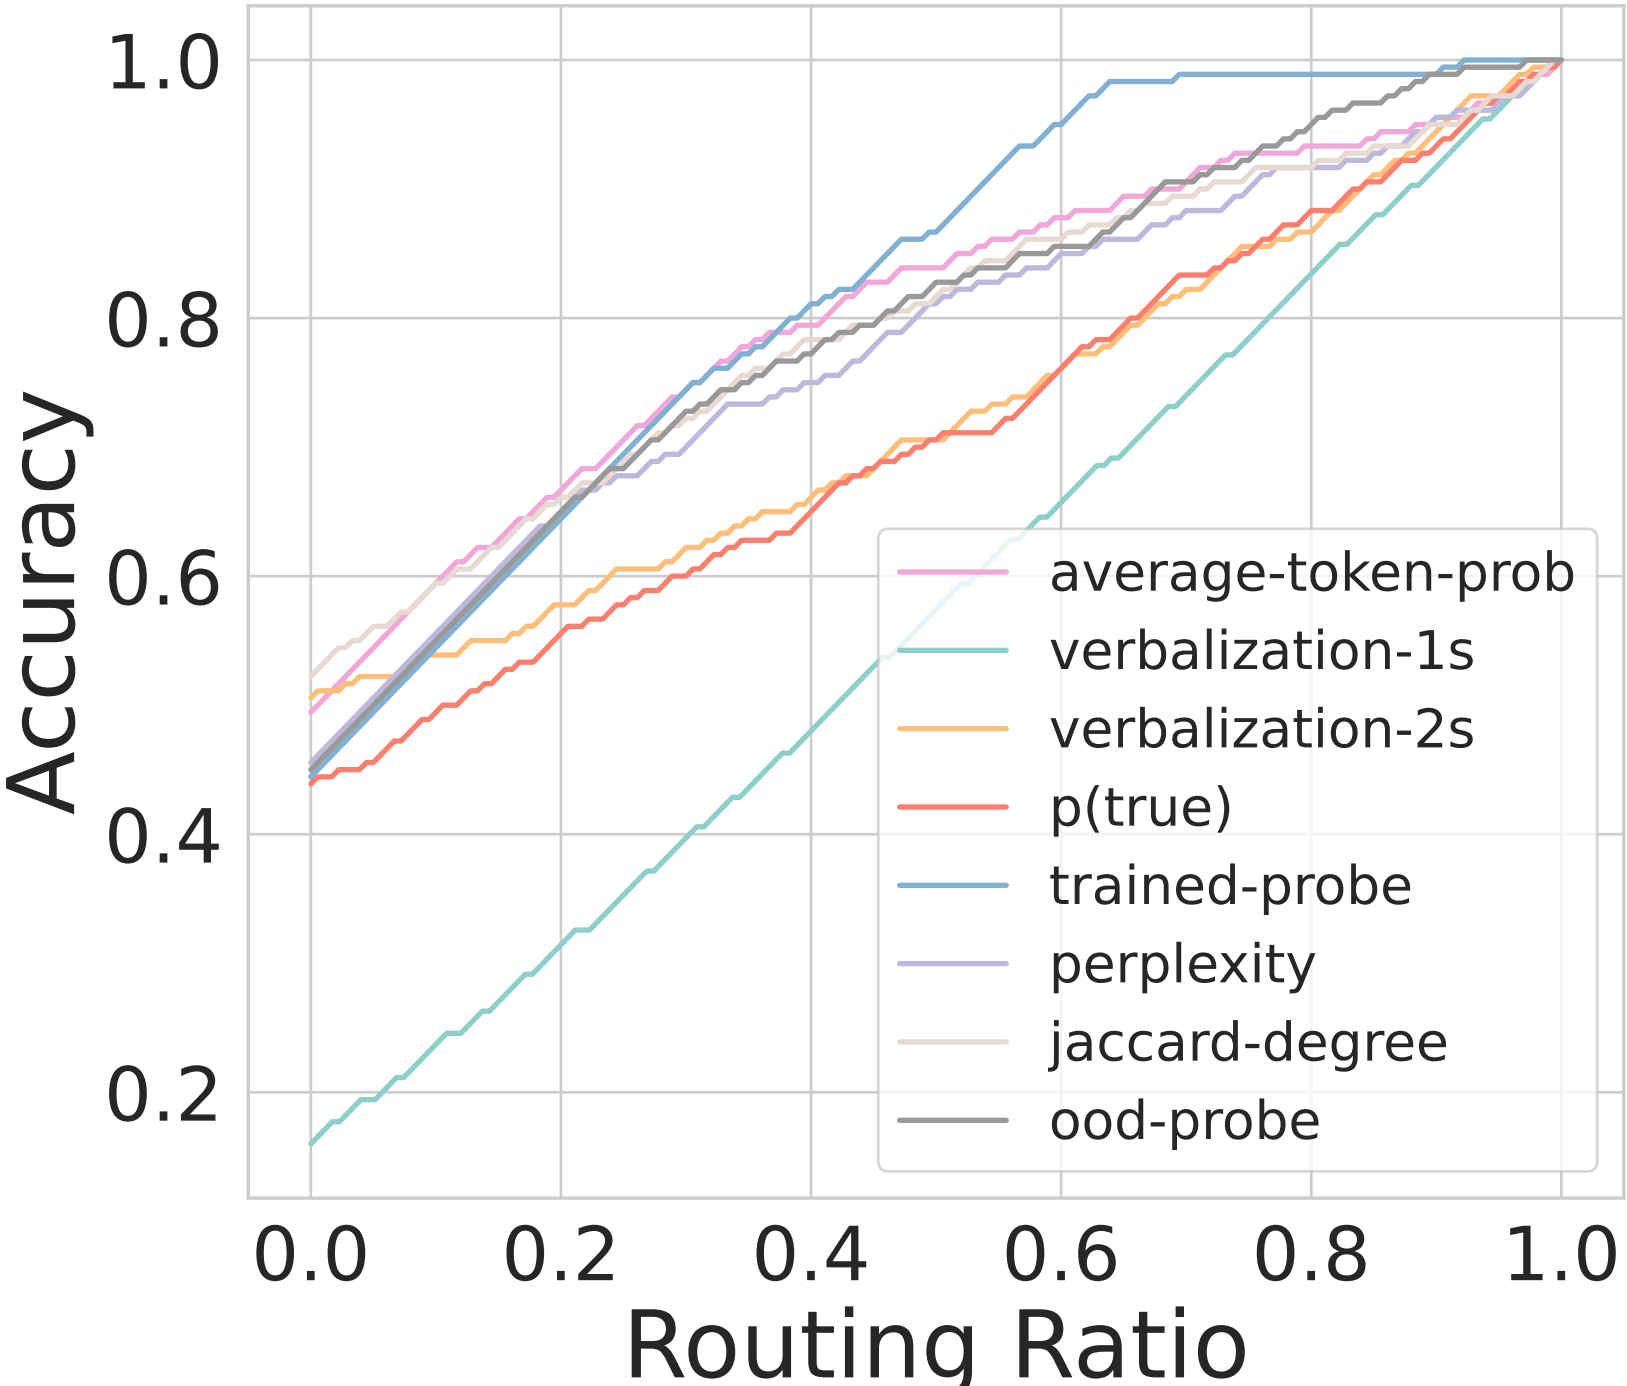

Supplement: supplementary_material [file rr_acc_multiarith_llama-3.2-1b_llama70.pdf › Routing_SLM_LLMs/Uncertainty-based Routing/w_legend/to_llama70/rr_acc_multiarith_llama-3.2-1b_llama70.pdf]

# MultiArith, mistral-7b to Llama-3.1-70B

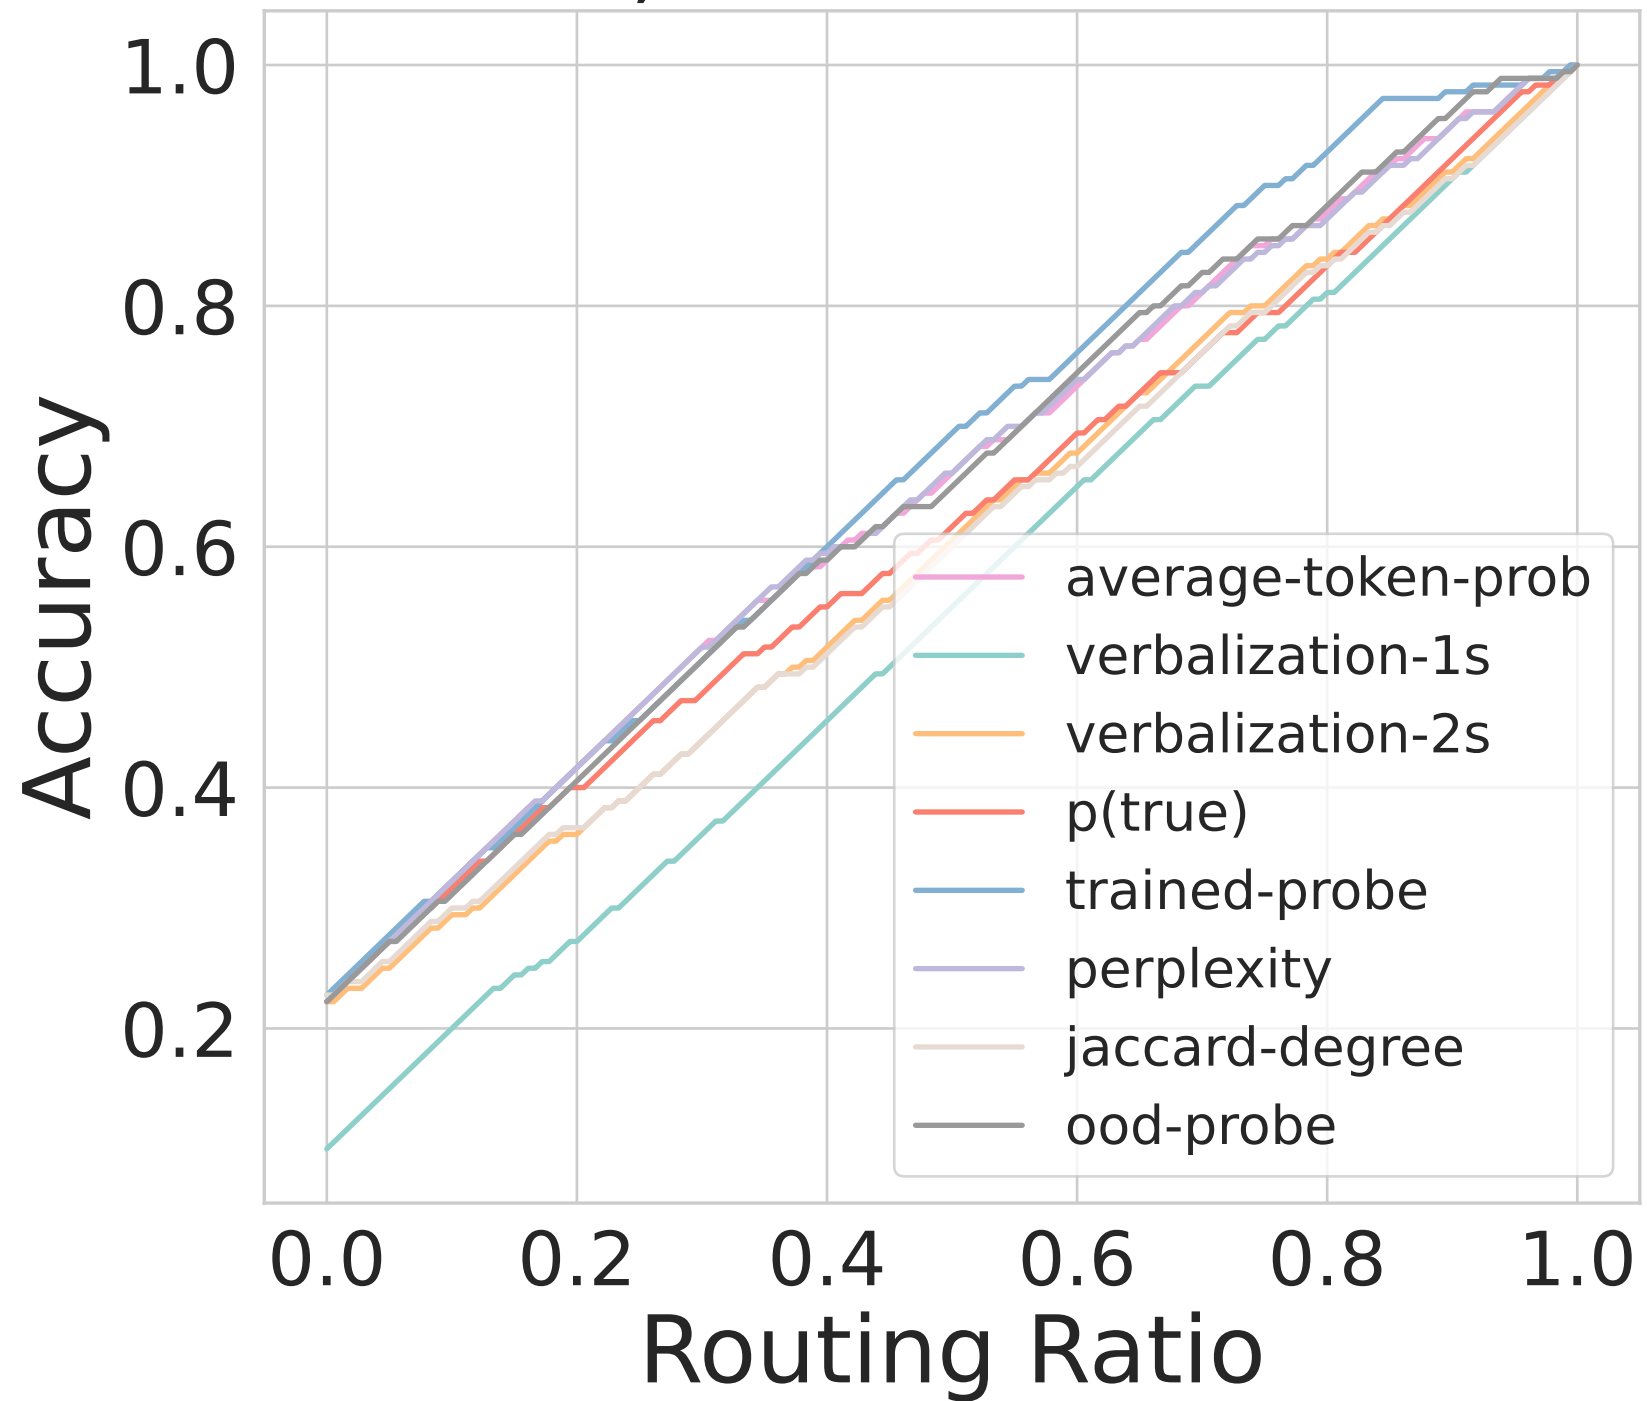

Supplement: supplementary_material [file rr_acc_multiarith_mistral-7b_llama70.pdf › Routing_SLM_LLMs/Uncertainty-based Routing/w_legend/to_llama70/rr_acc_multiarith_mistral-7b_llama70.pdf]

# MultiArith, qwen-2.5-7b to Llama-3.1-70B

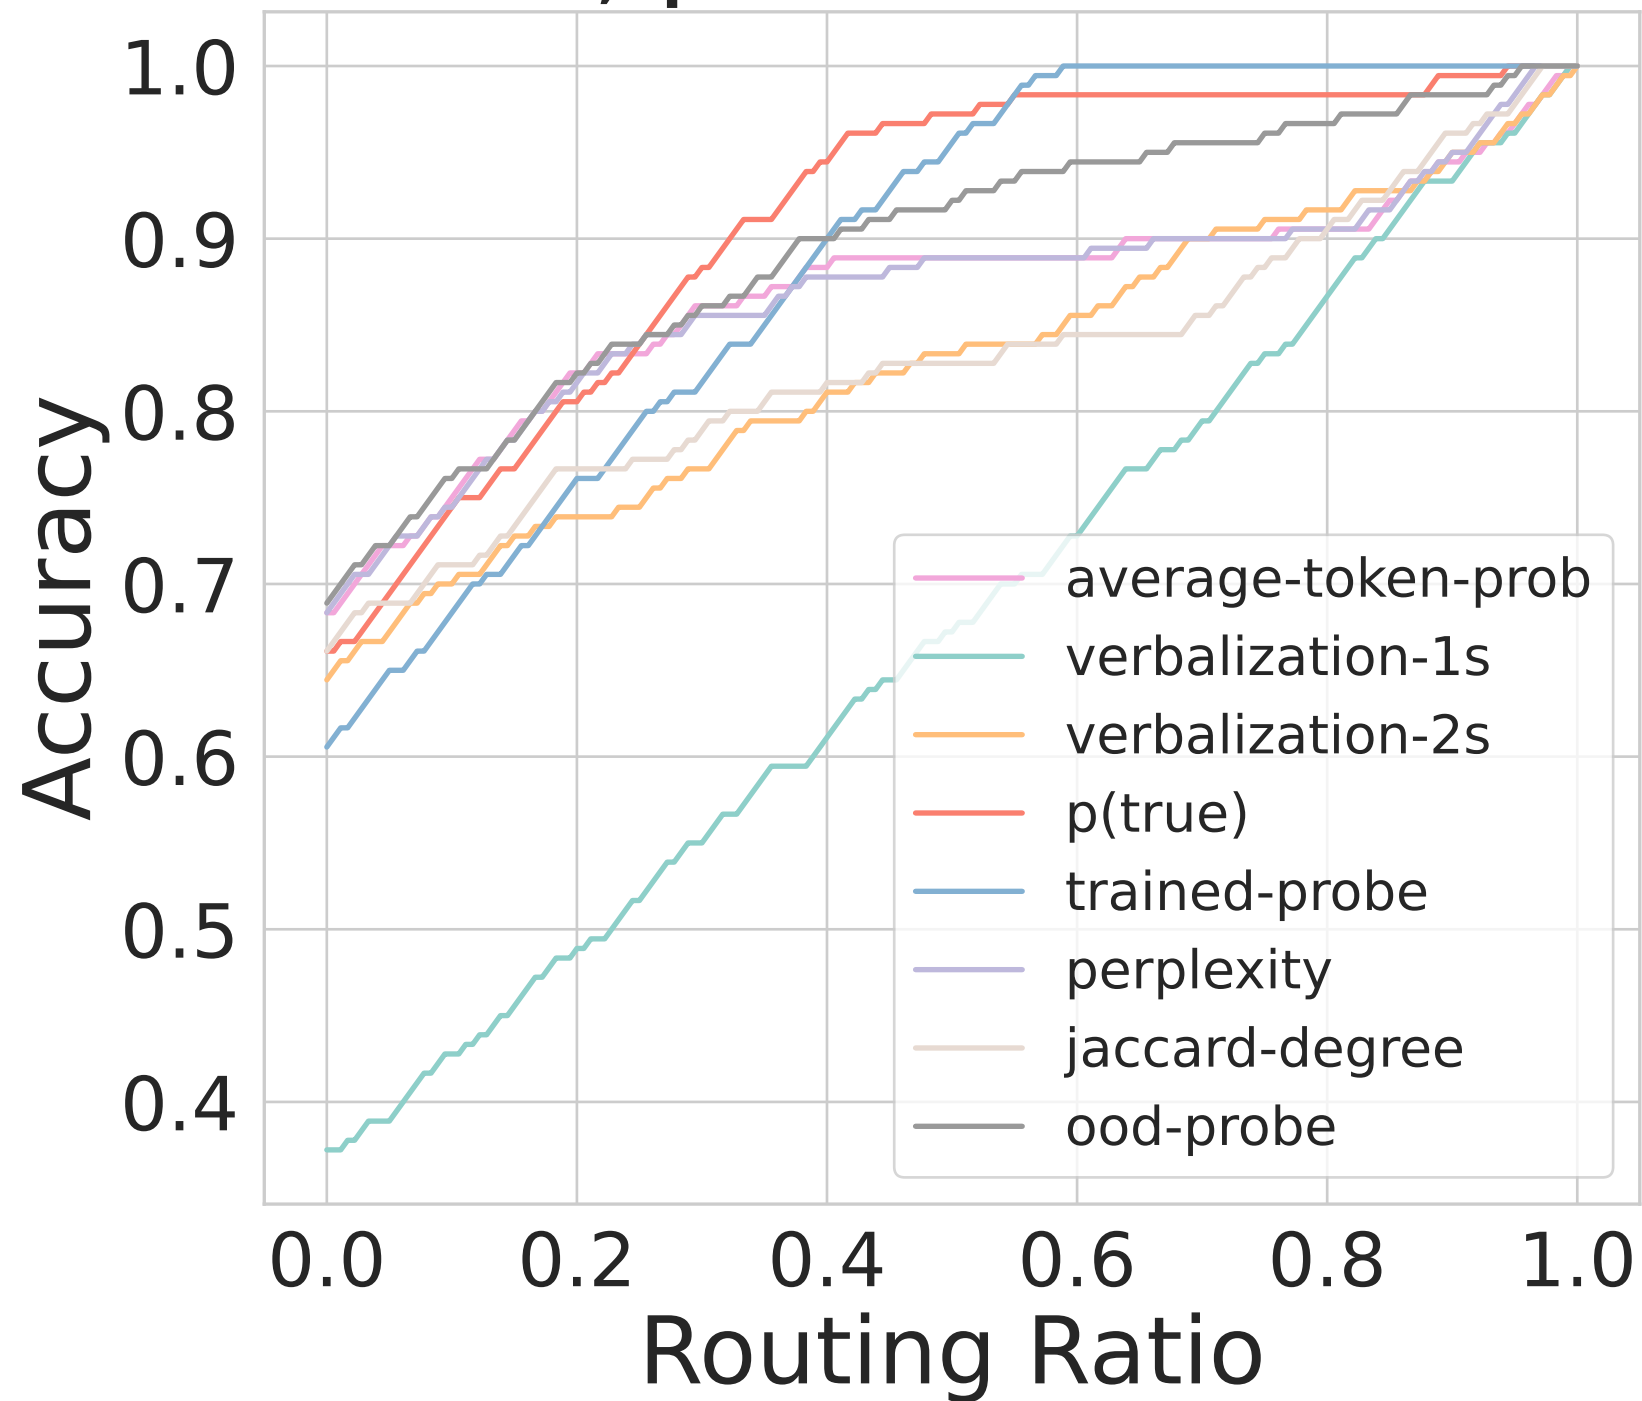

Supplement: supplementary_material [file rr_acc_multiarith_qwen-2.5-7b_llama70.pdf › Routing_SLM_LLMs/Uncertainty-based Routing/w_legend/to_llama70/rr_acc_multiarith_qwen-2.5-7b_llama70.pdf]

# MultiArith, rwkv to Llama-3.1-70B

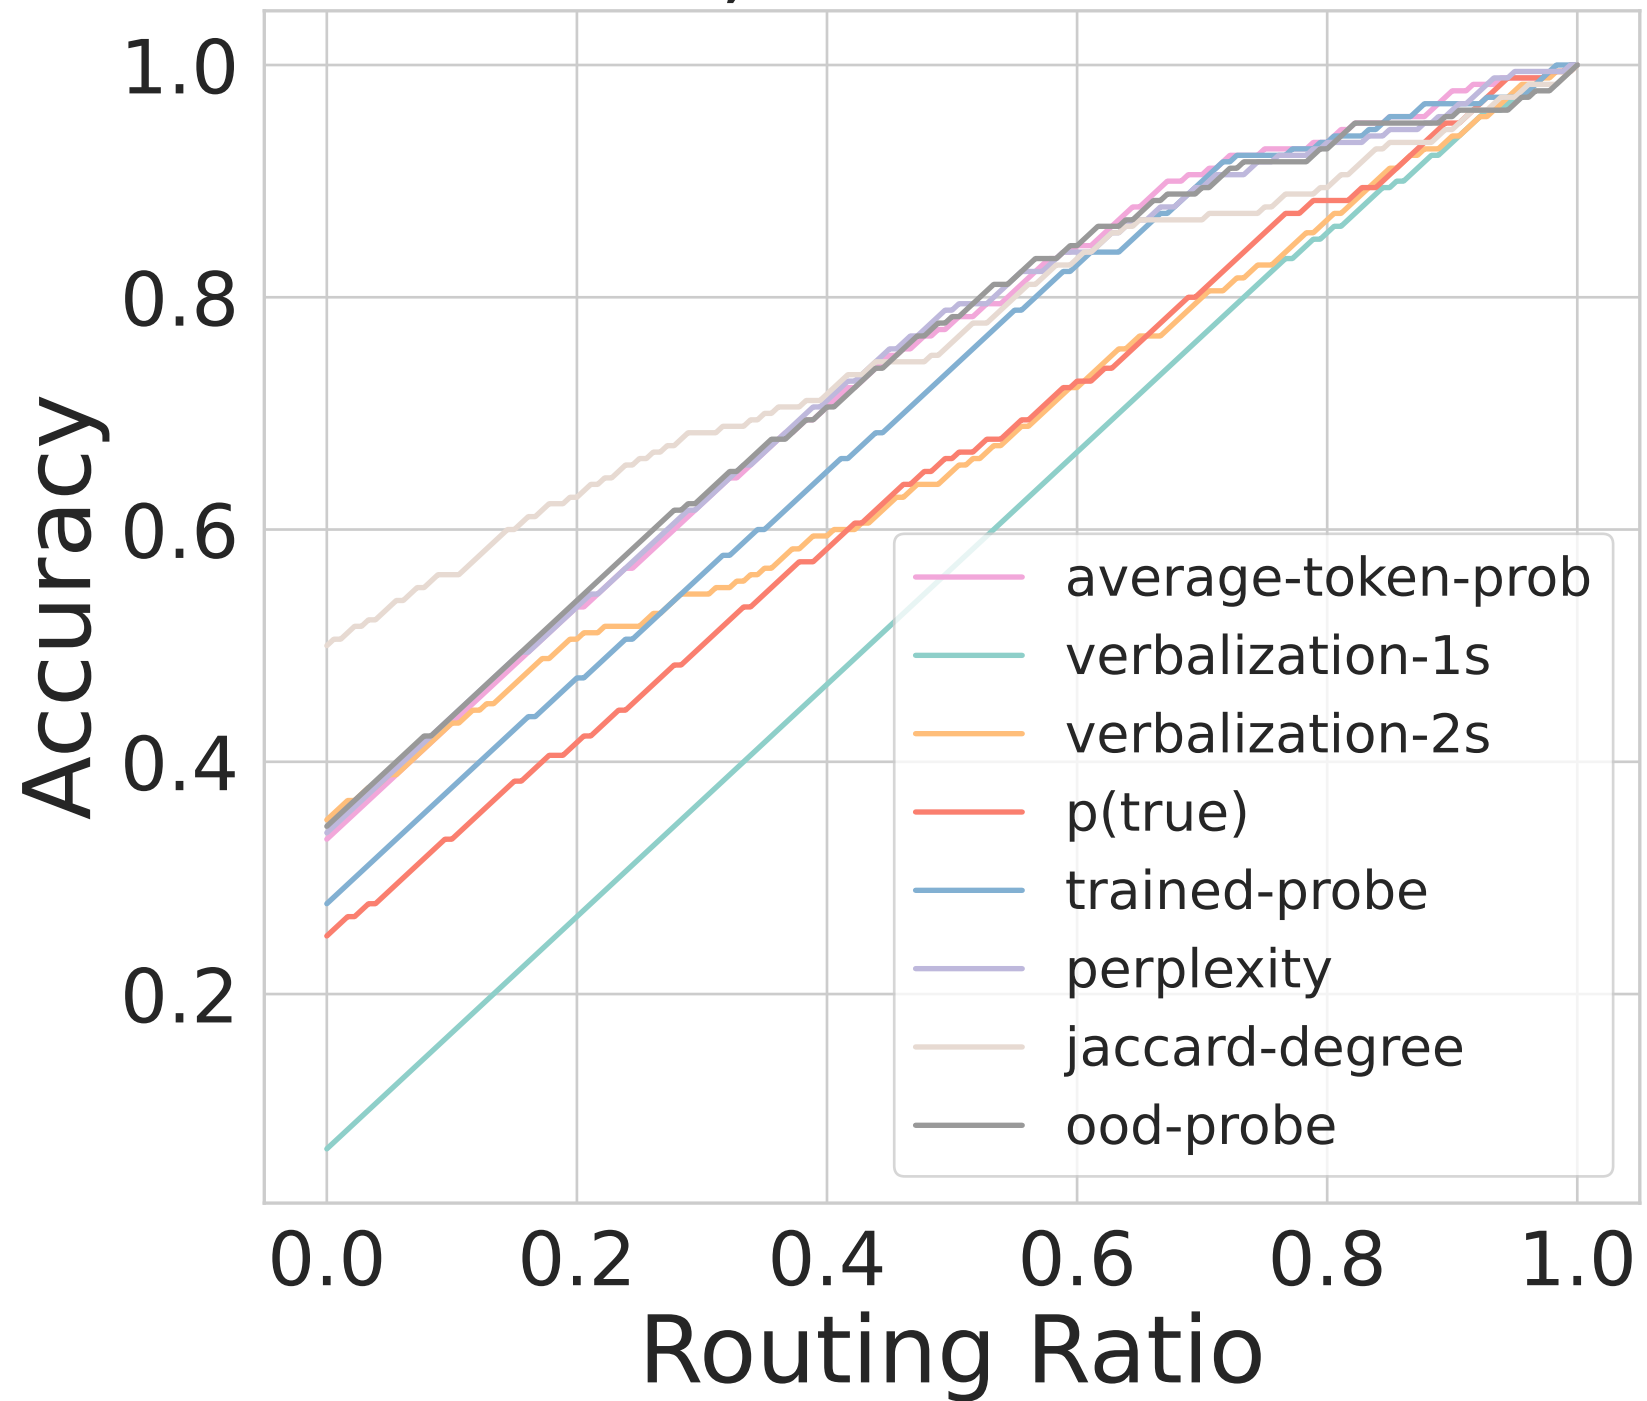

Supplement: supplementary_material [file rr_acc_multiarith_rwkv_llama70.pdf › Routing_SLM_LLMs/Uncertainty-based Routing/w_legend/to_llama70/rr_acc_multiarith_rwkv_llama70.pdf]

# OpenBookQA, Qwen3-0.6B to Llama-3.1-70B

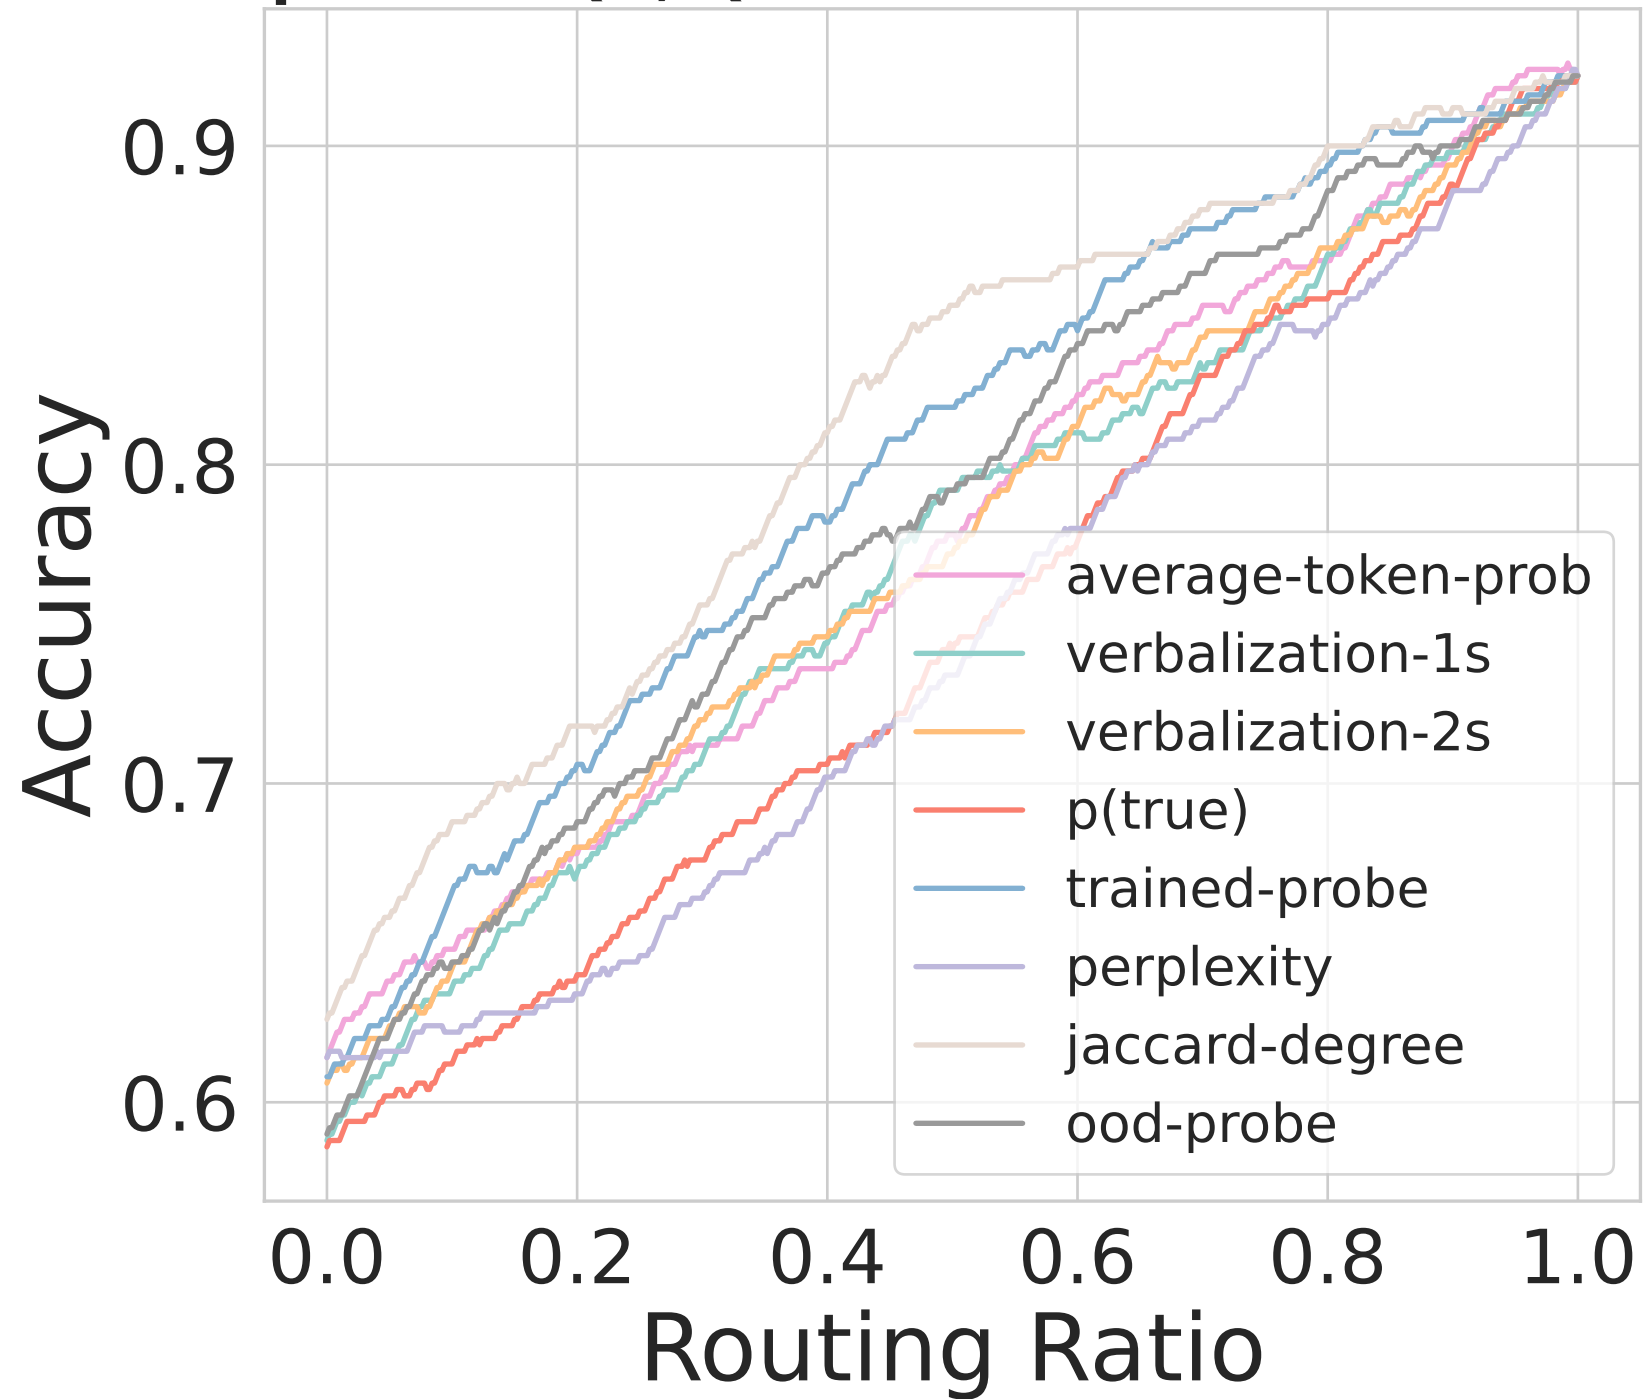

Supplement: supplementary_material [file rr_acc_openbook_qa_Qwen3-0.6B_llama70.pdf › Routing_SLM_LLMs/Uncertainty-based Routing/w_legend/to_llama70/rr_acc_openbook_qa_Qwen3-0.6B_llama70.pdf]

# OpenBookQA, Qwen3-4B to Llama-3.1-70B

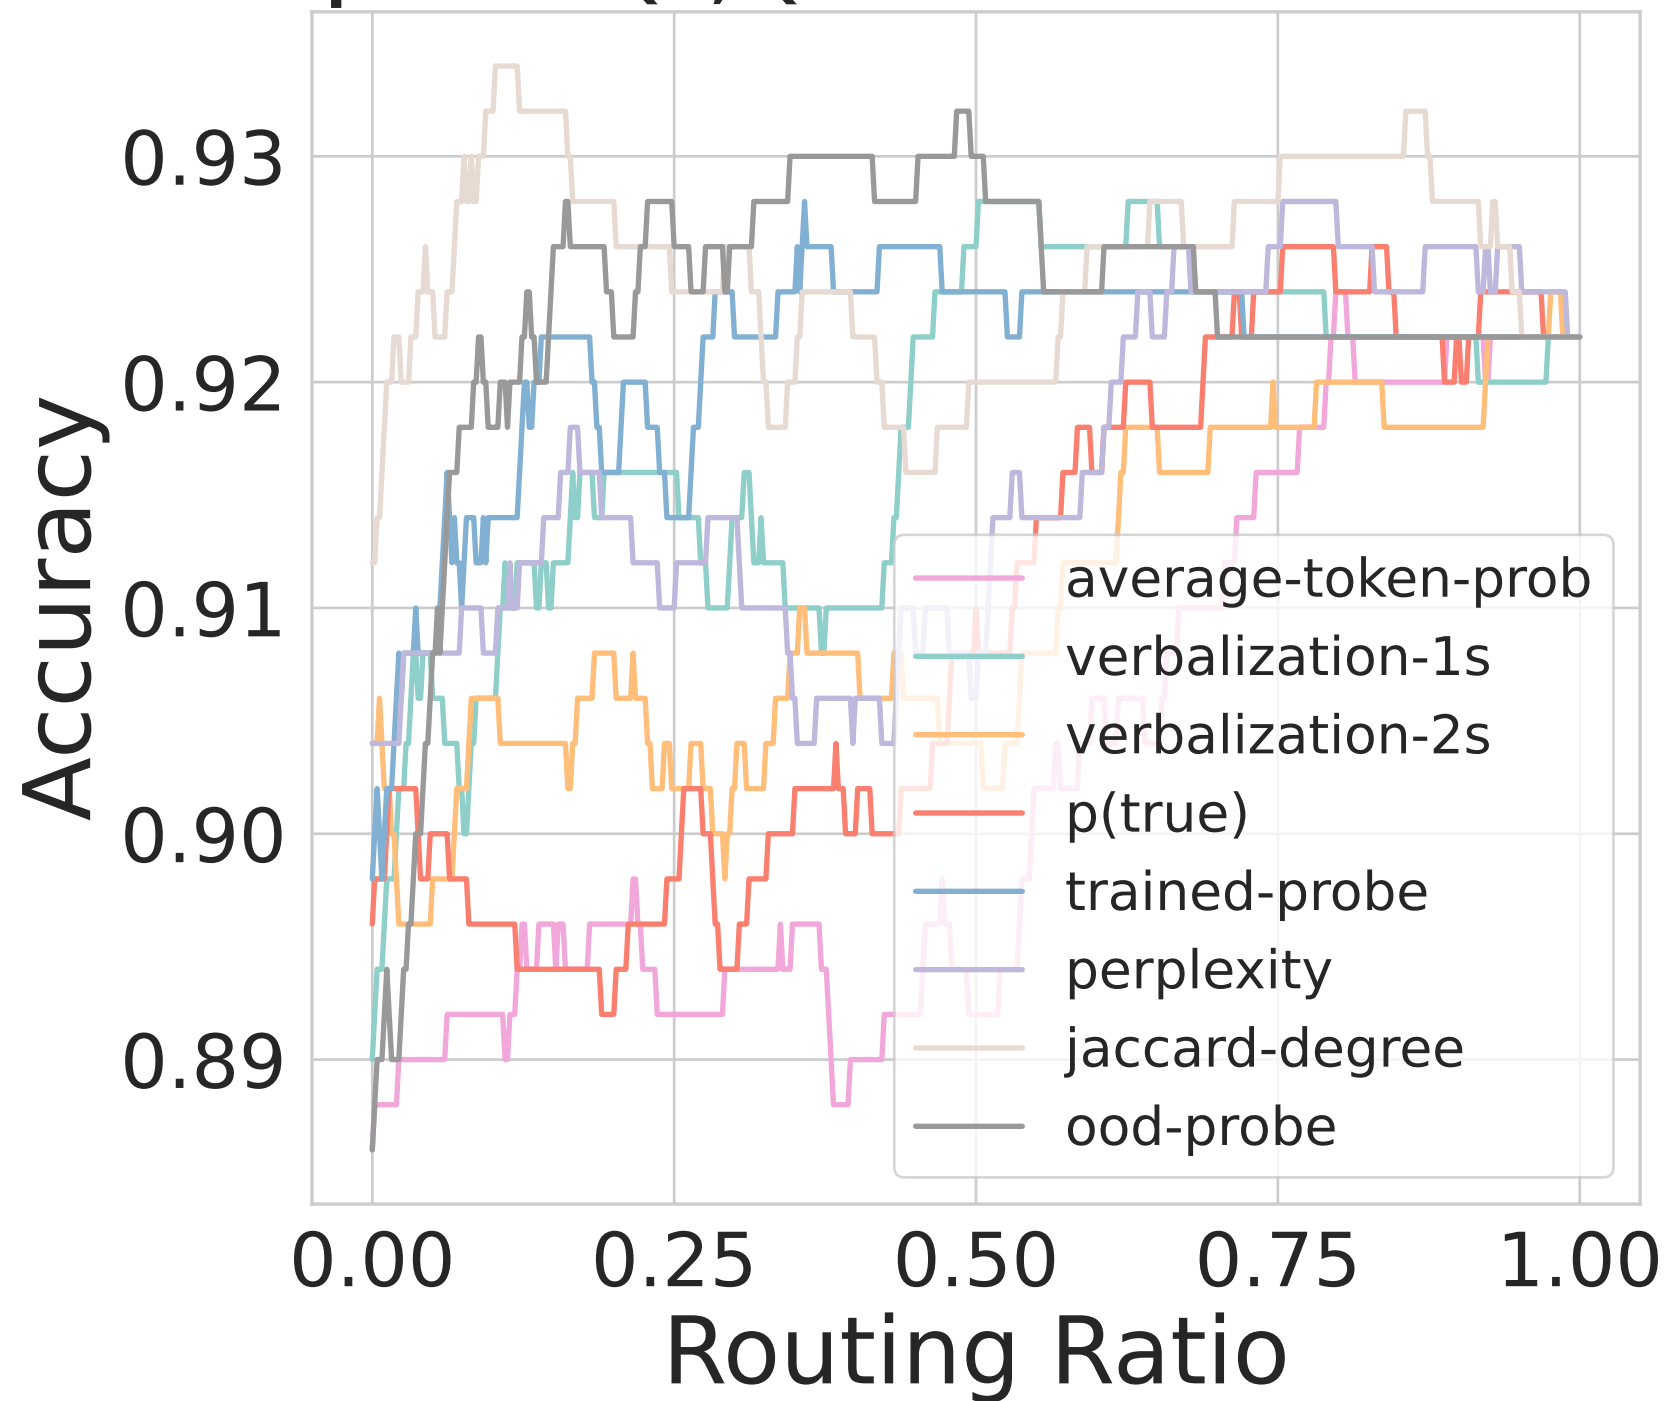

Supplement: supplementary_material [file rr_acc_openbook_qa_Qwen3-4B_llama70.pdf › Routing_SLM_LLMs/Uncertainty-based Routing/w_legend/to_llama70/rr_acc_openbook_qa_Qwen3-4B_llama70.pdf]

# OpenBookQA, granite-3.1-8b to Llama-3.1-70B

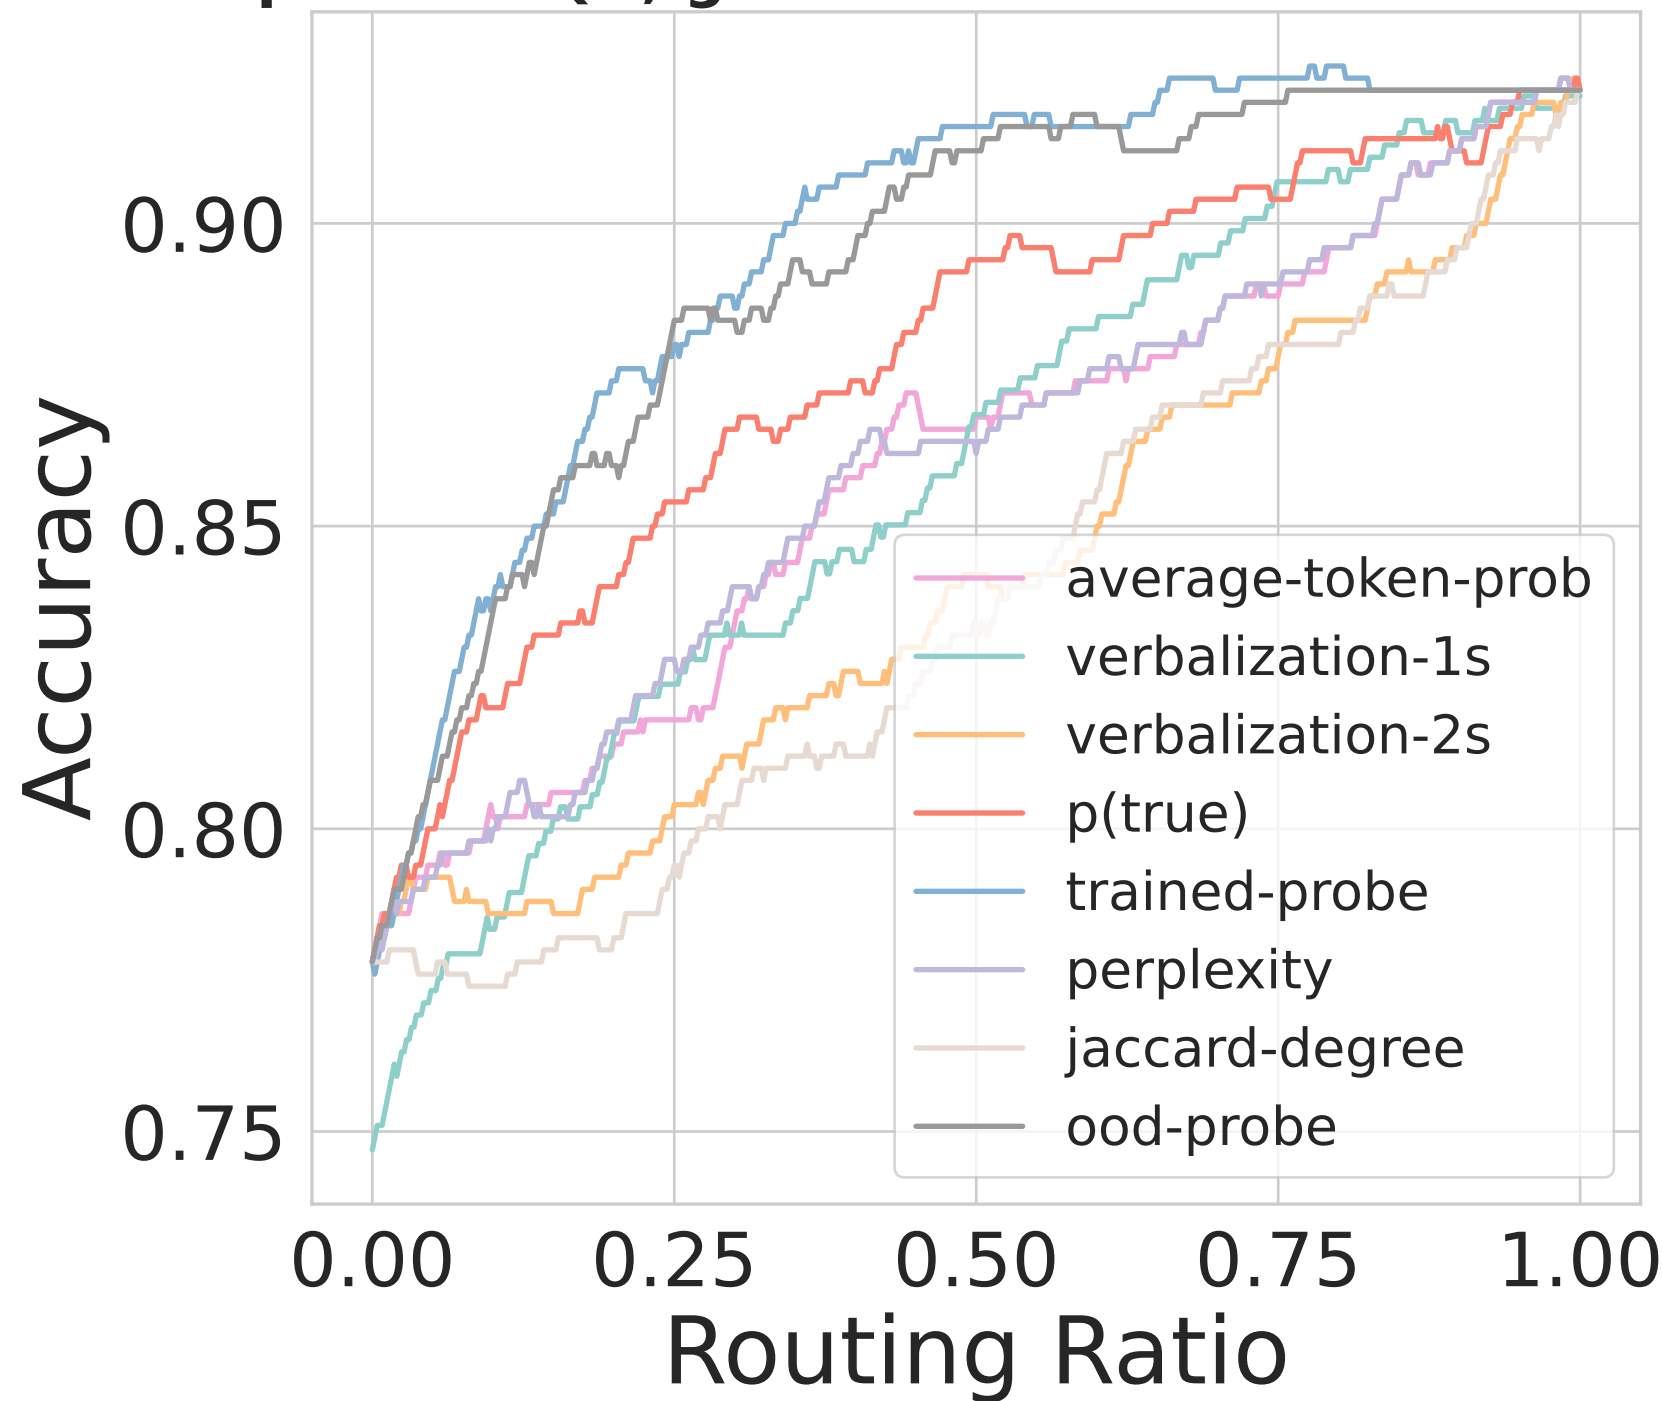

Supplement: supplementary_material [file rr_acc_openbook_qa_granite-3.1-8b_llama70.pdf › Routing_SLM_LLMs/Uncertainty-based Routing/w_legend/to_llama70/rr_acc_openbook_qa_granite-3.1-8b_llama70.pdf]

# OpenBookQA, llama-3.1-8b to Llama-3.1-70B

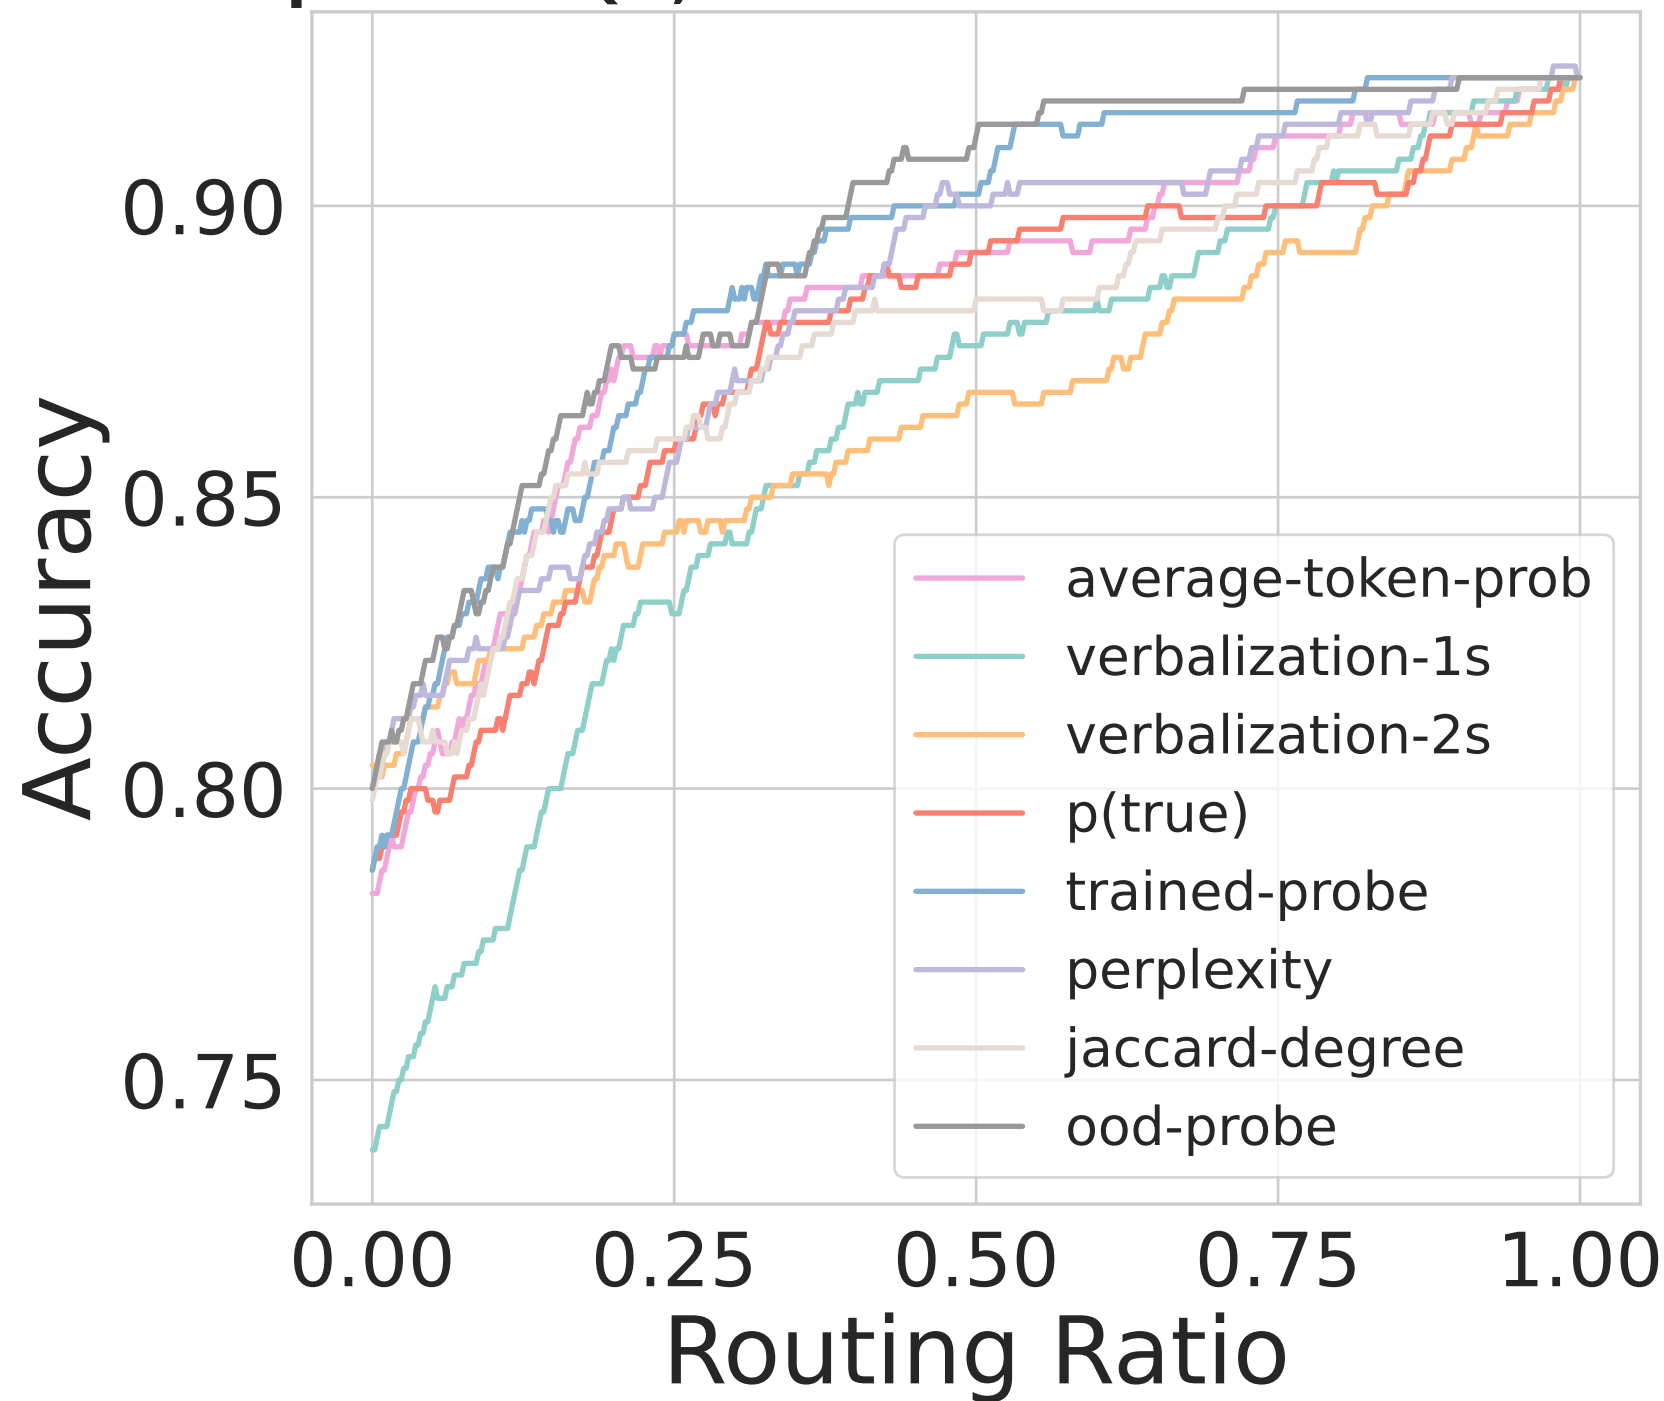

Supplement: supplementary_material [file rr_acc_openbook_qa_llama-3.1-8b_llama70.pdf › Routing_SLM_LLMs/Uncertainty-based Routing/w_legend/to_llama70/rr_acc_openbook_qa_llama-3.1-8b_llama70.pdf]

OpenBookQA, llama-3.2-1b to Llama-3.1-70B

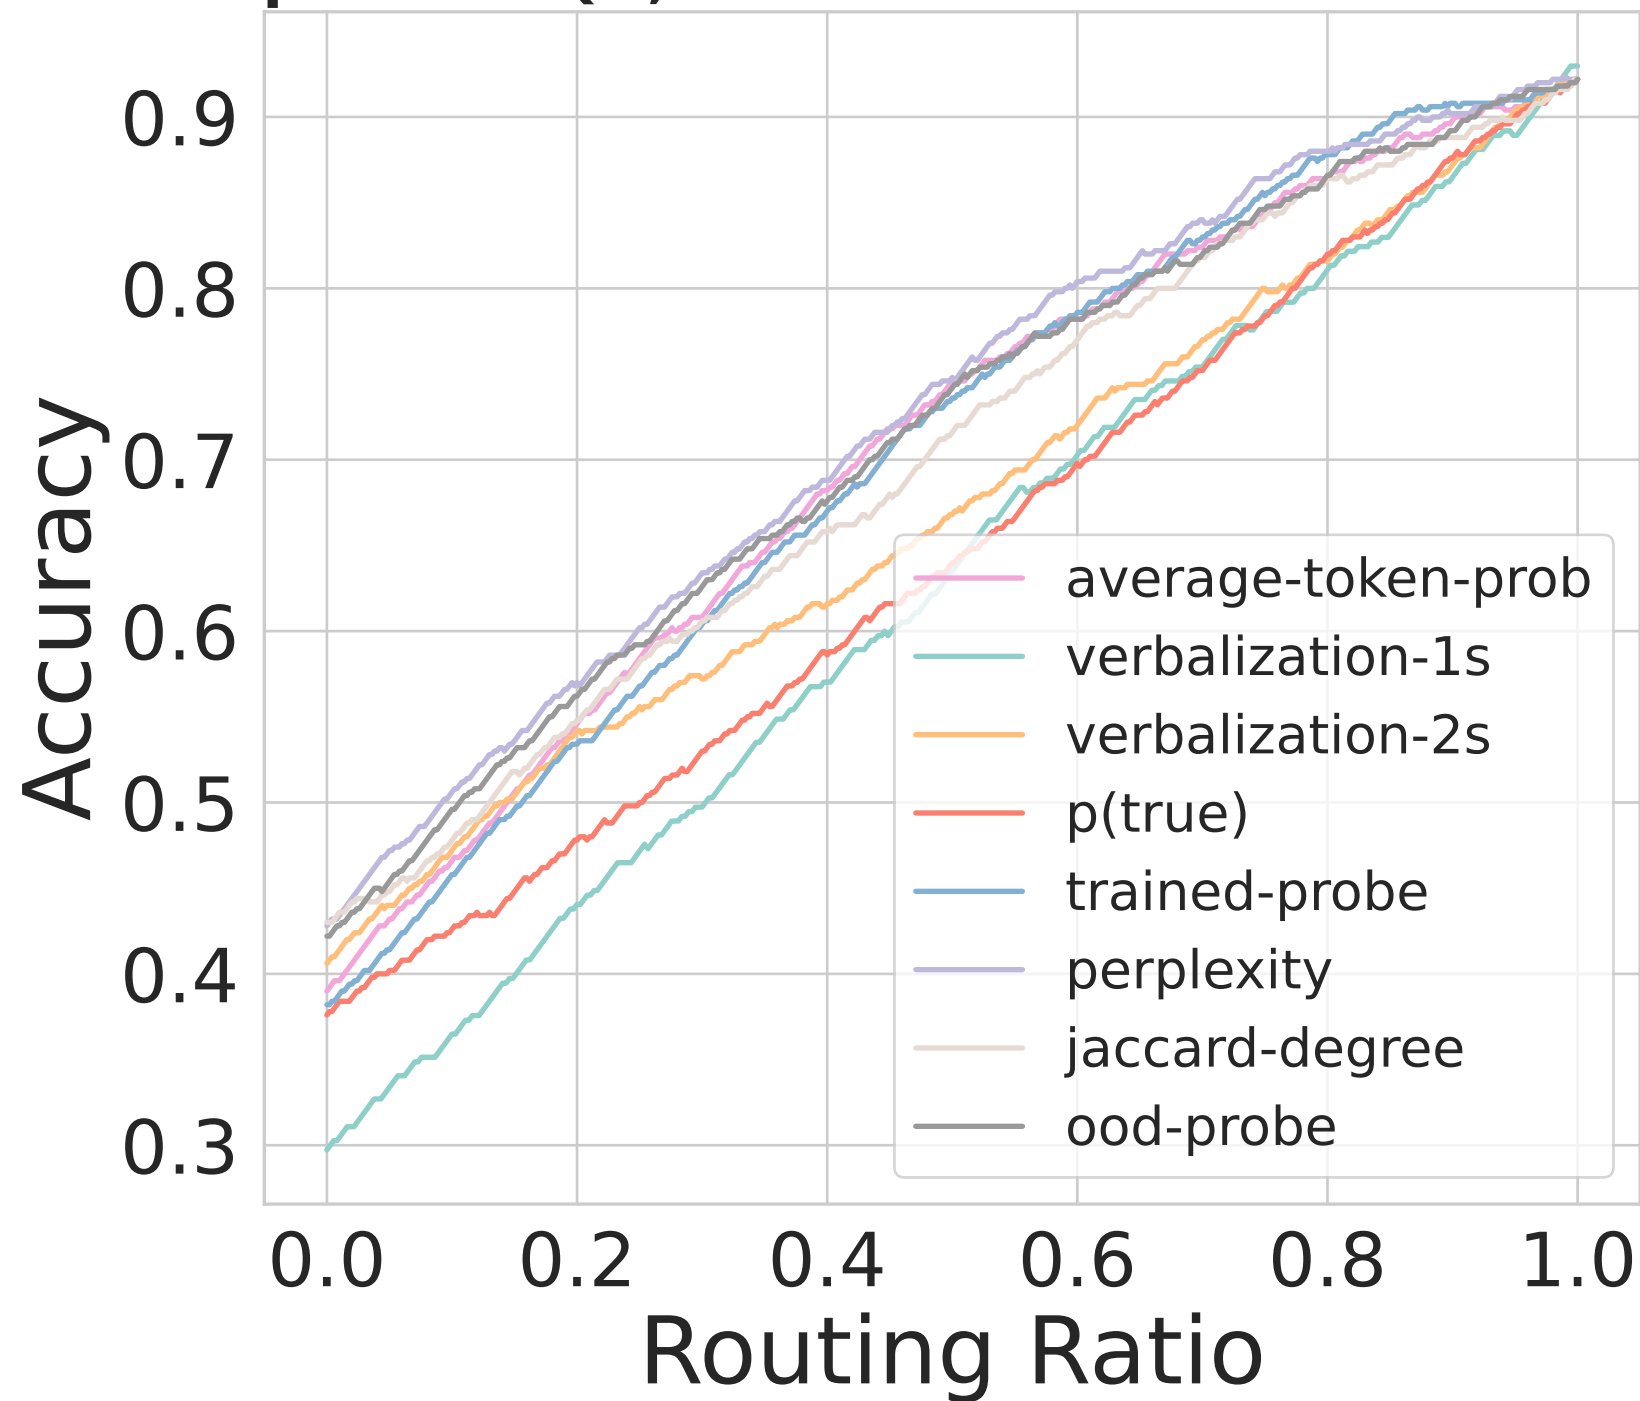

Supplement: supplementary_material [file rr_acc_openbook_qa_llama-3.2-1b_llama70.pdf › Routing_SLM_LLMs/Uncertainty-based Routing/w_legend/to_llama70/rr_acc_openbook_qa_llama-3.2-1b_llama70.pdf]

# OpenBookQA, llama-3.2-3b to Llama-3.1-70B

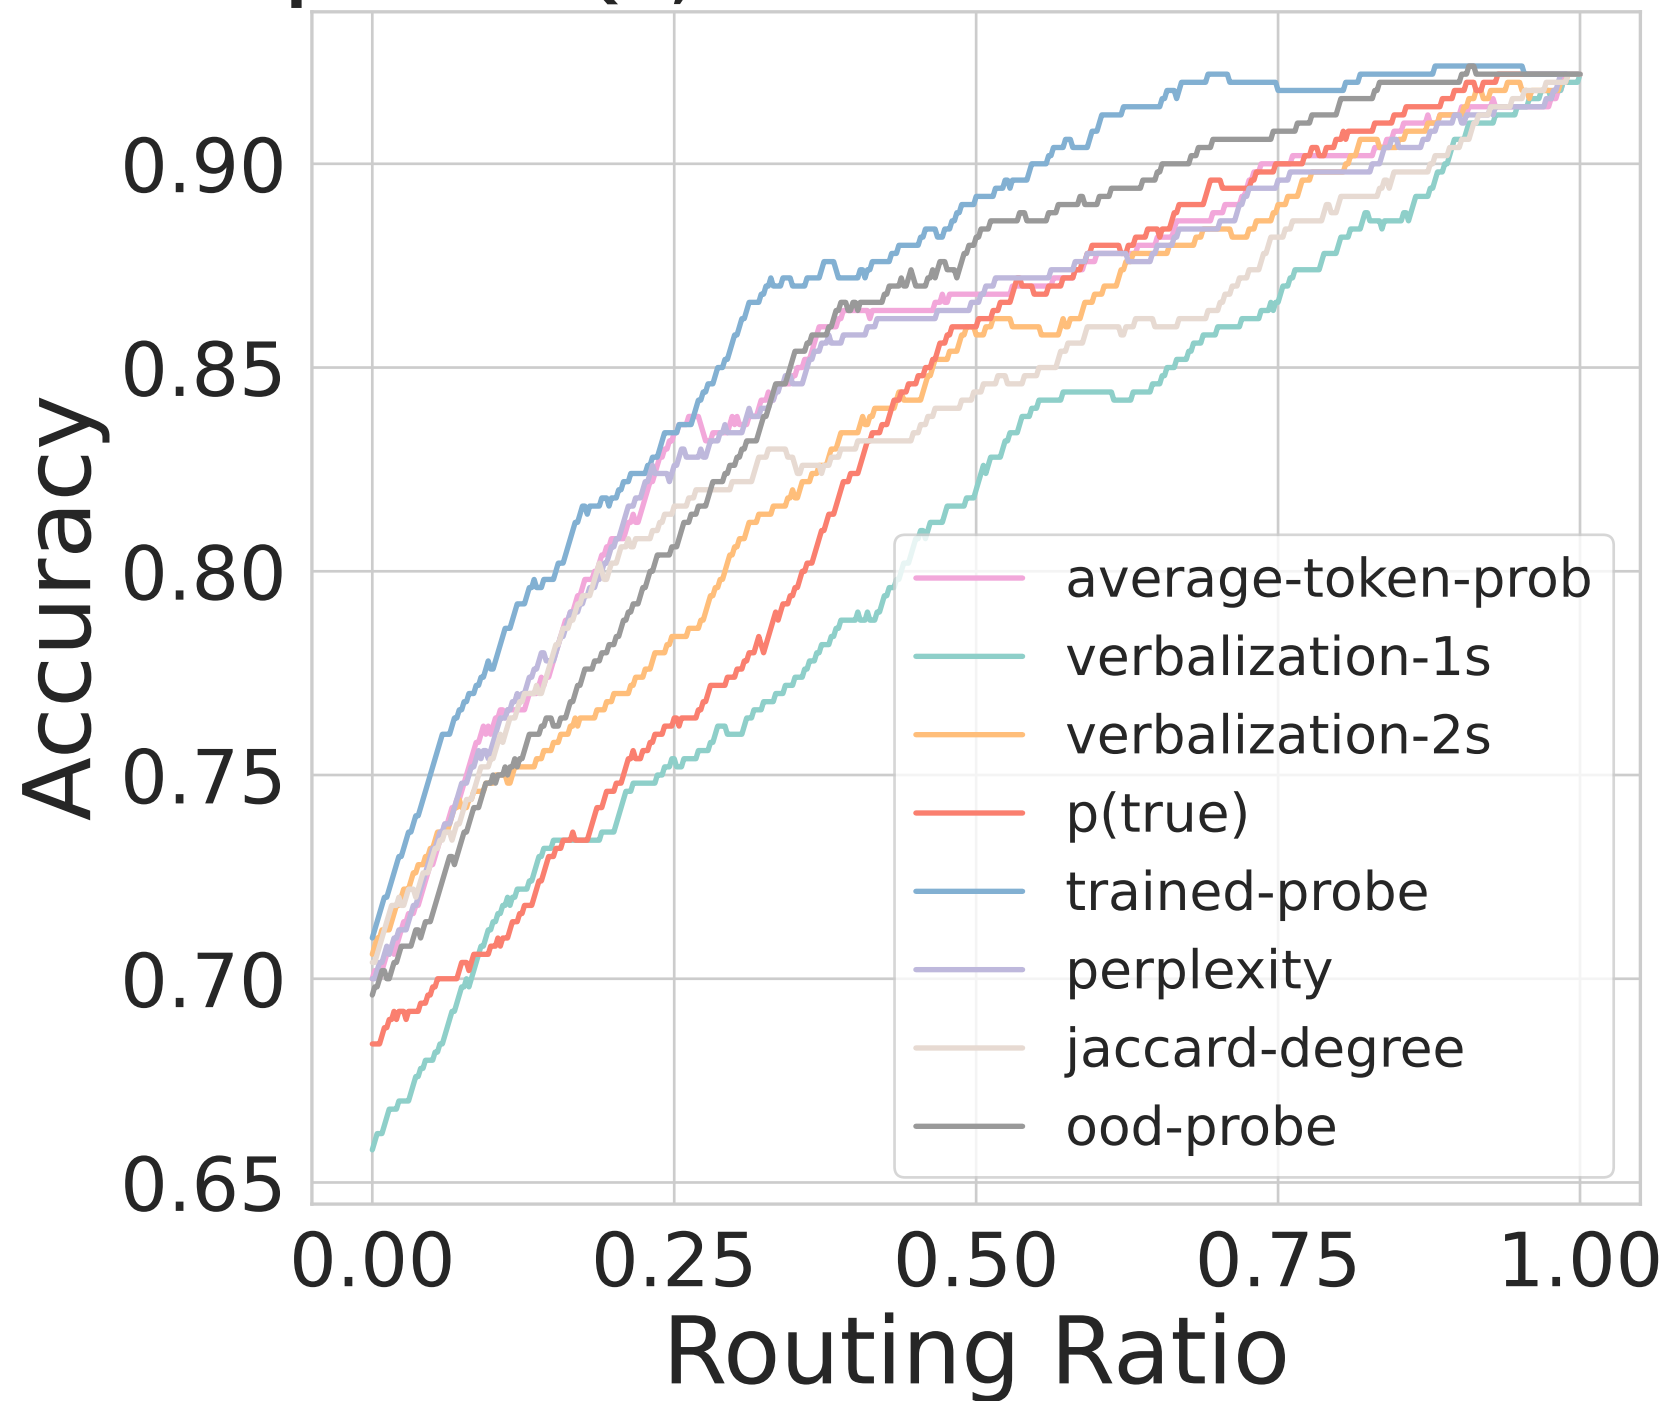

Supplement: supplementary_material [file rr_acc_openbook_qa_llama-3.2-3b_llama70.pdf › Routing_SLM_LLMs/Uncertainty-based Routing/w_legend/to_llama70/rr_acc_openbook_qa_llama-3.2-3b_llama70.pdf]

# OpenBookQA, mistral-7b to Llama-3.1-70B

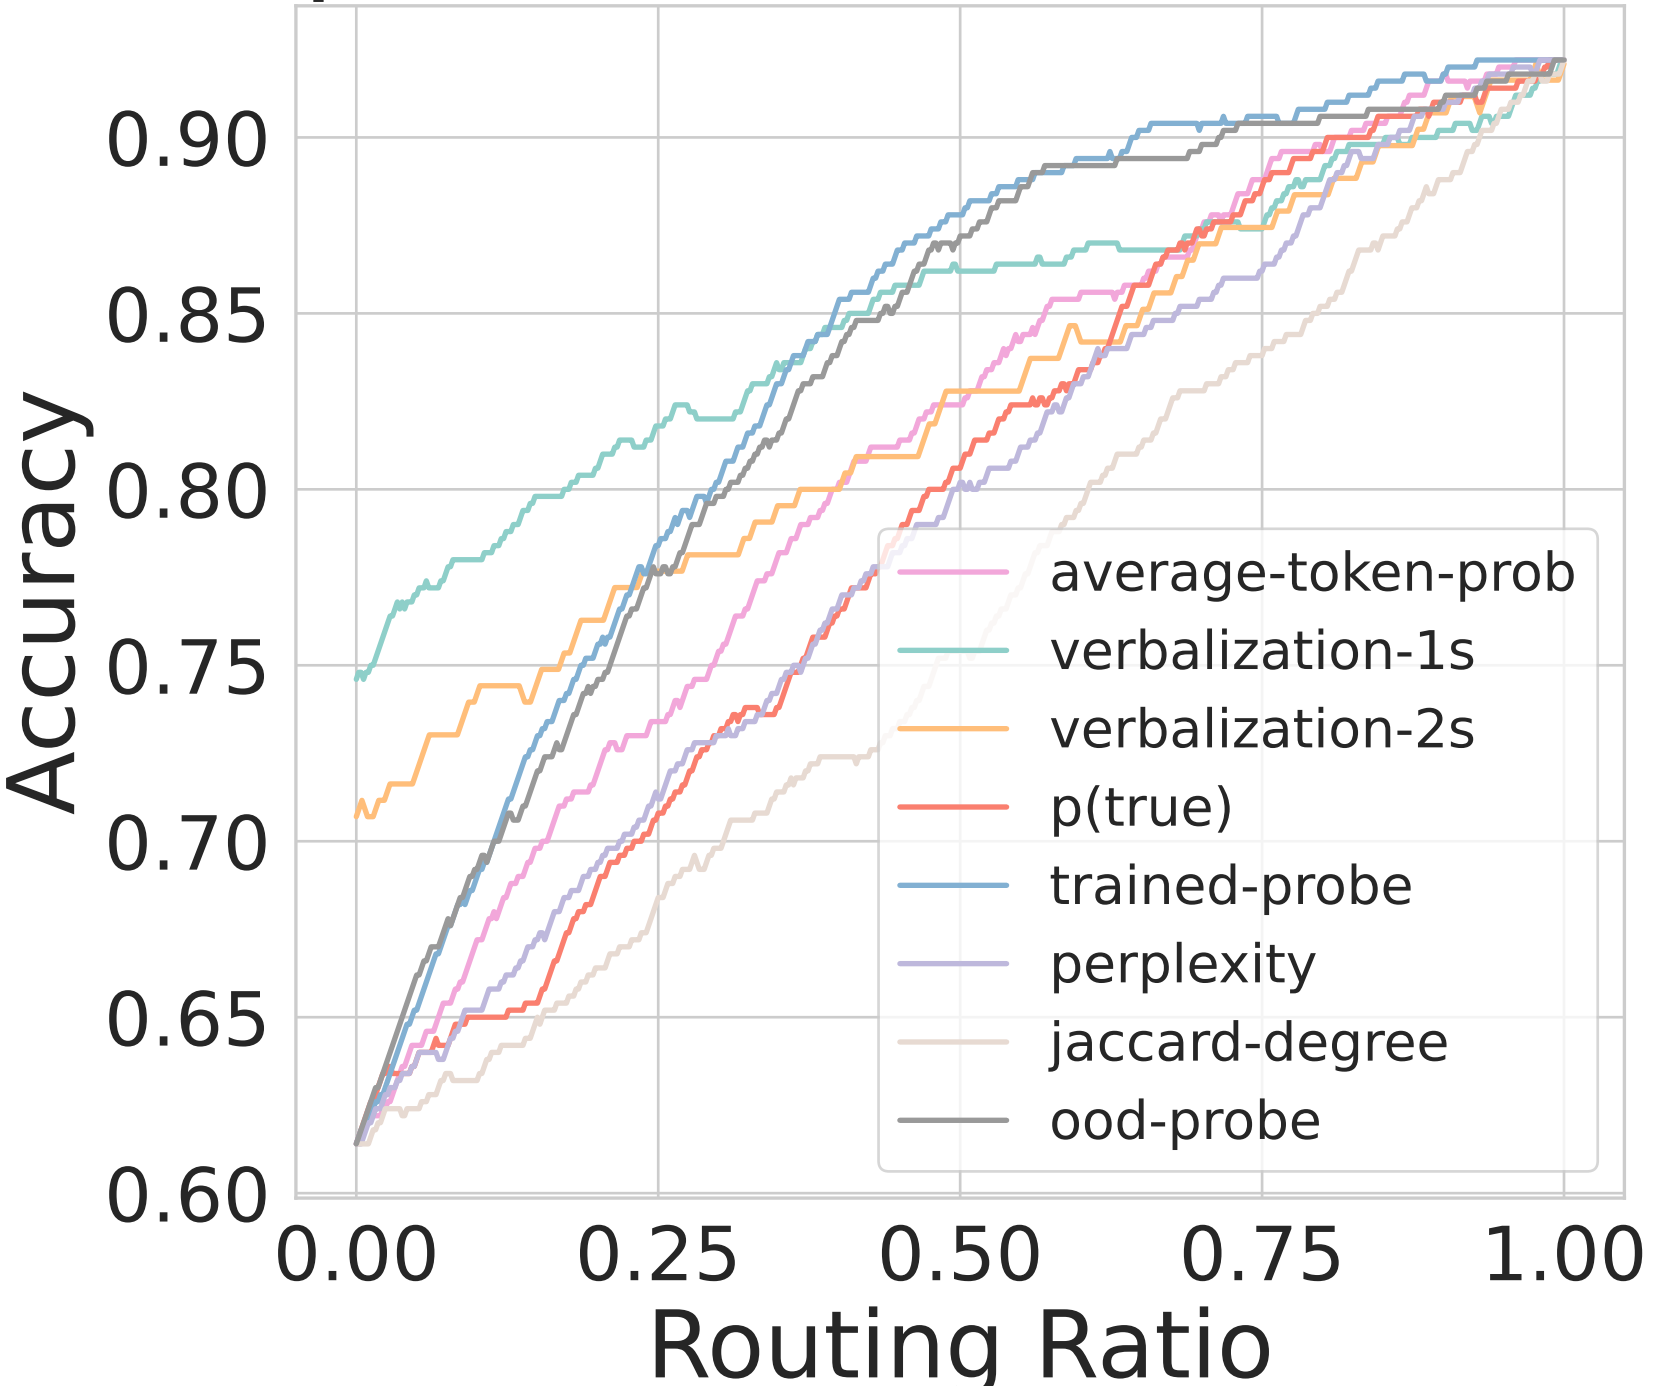

Supplement: supplementary_material [file rr_acc_openbook_qa_mistral-7b_llama70.pdf › Routing_SLM_LLMs/Uncertainty-based Routing/w_legend/to_llama70/rr_acc_openbook_qa_mistral-7b_llama70.pdf]

# OpenBookQA, phi-3.5-mini to Llama-3.1-70B

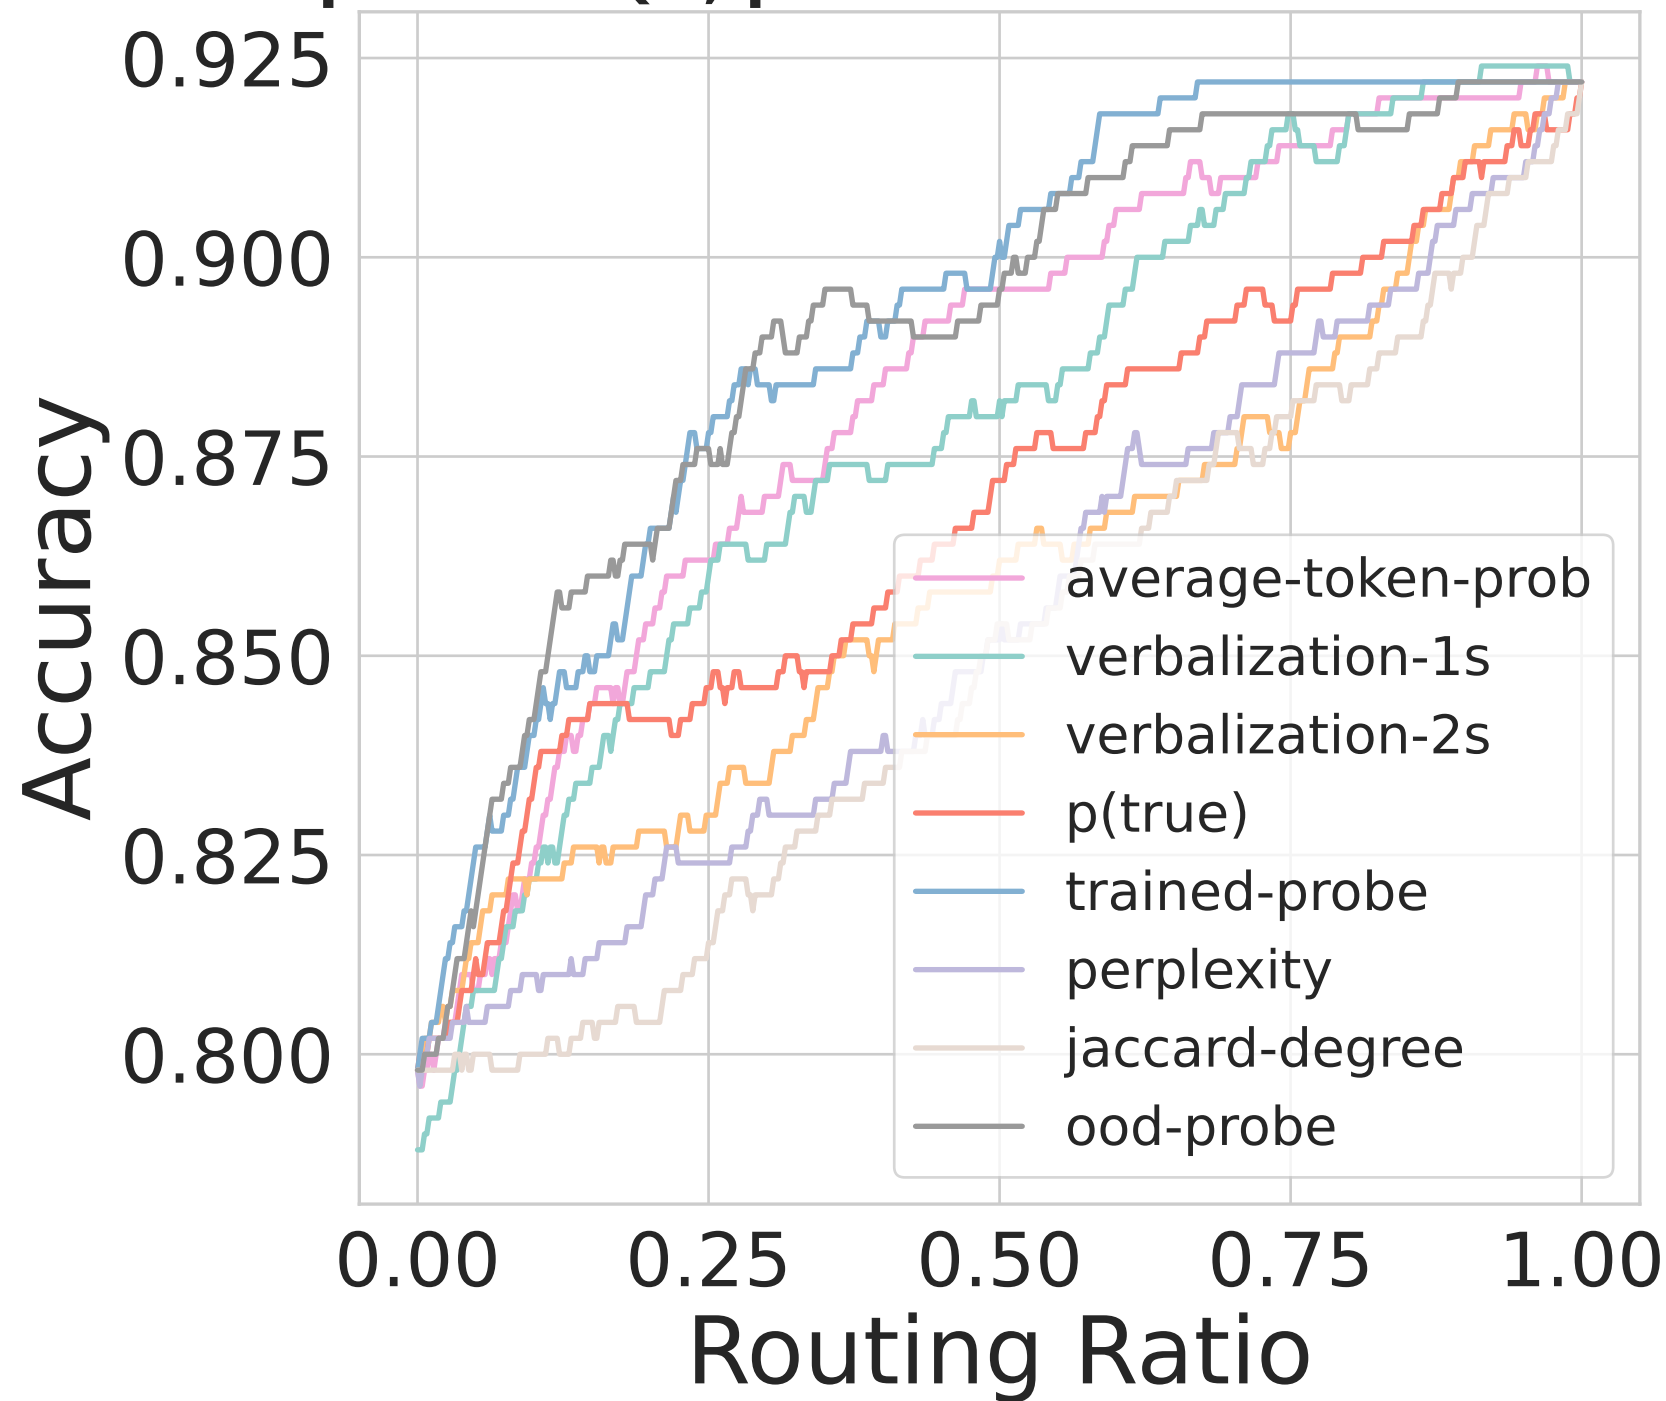

Supplement: supplementary_material [file rr_acc_openbook_qa_phi-3.5-mini_llama70.pdf › Routing_SLM_LLMs/Uncertainty-based Routing/w_legend/to_llama70/rr_acc_openbook_qa_phi-3.5-mini_llama70.pdf]

# OpenBookQA, phi-4-mini-reasoning to Llama-3.1-70B

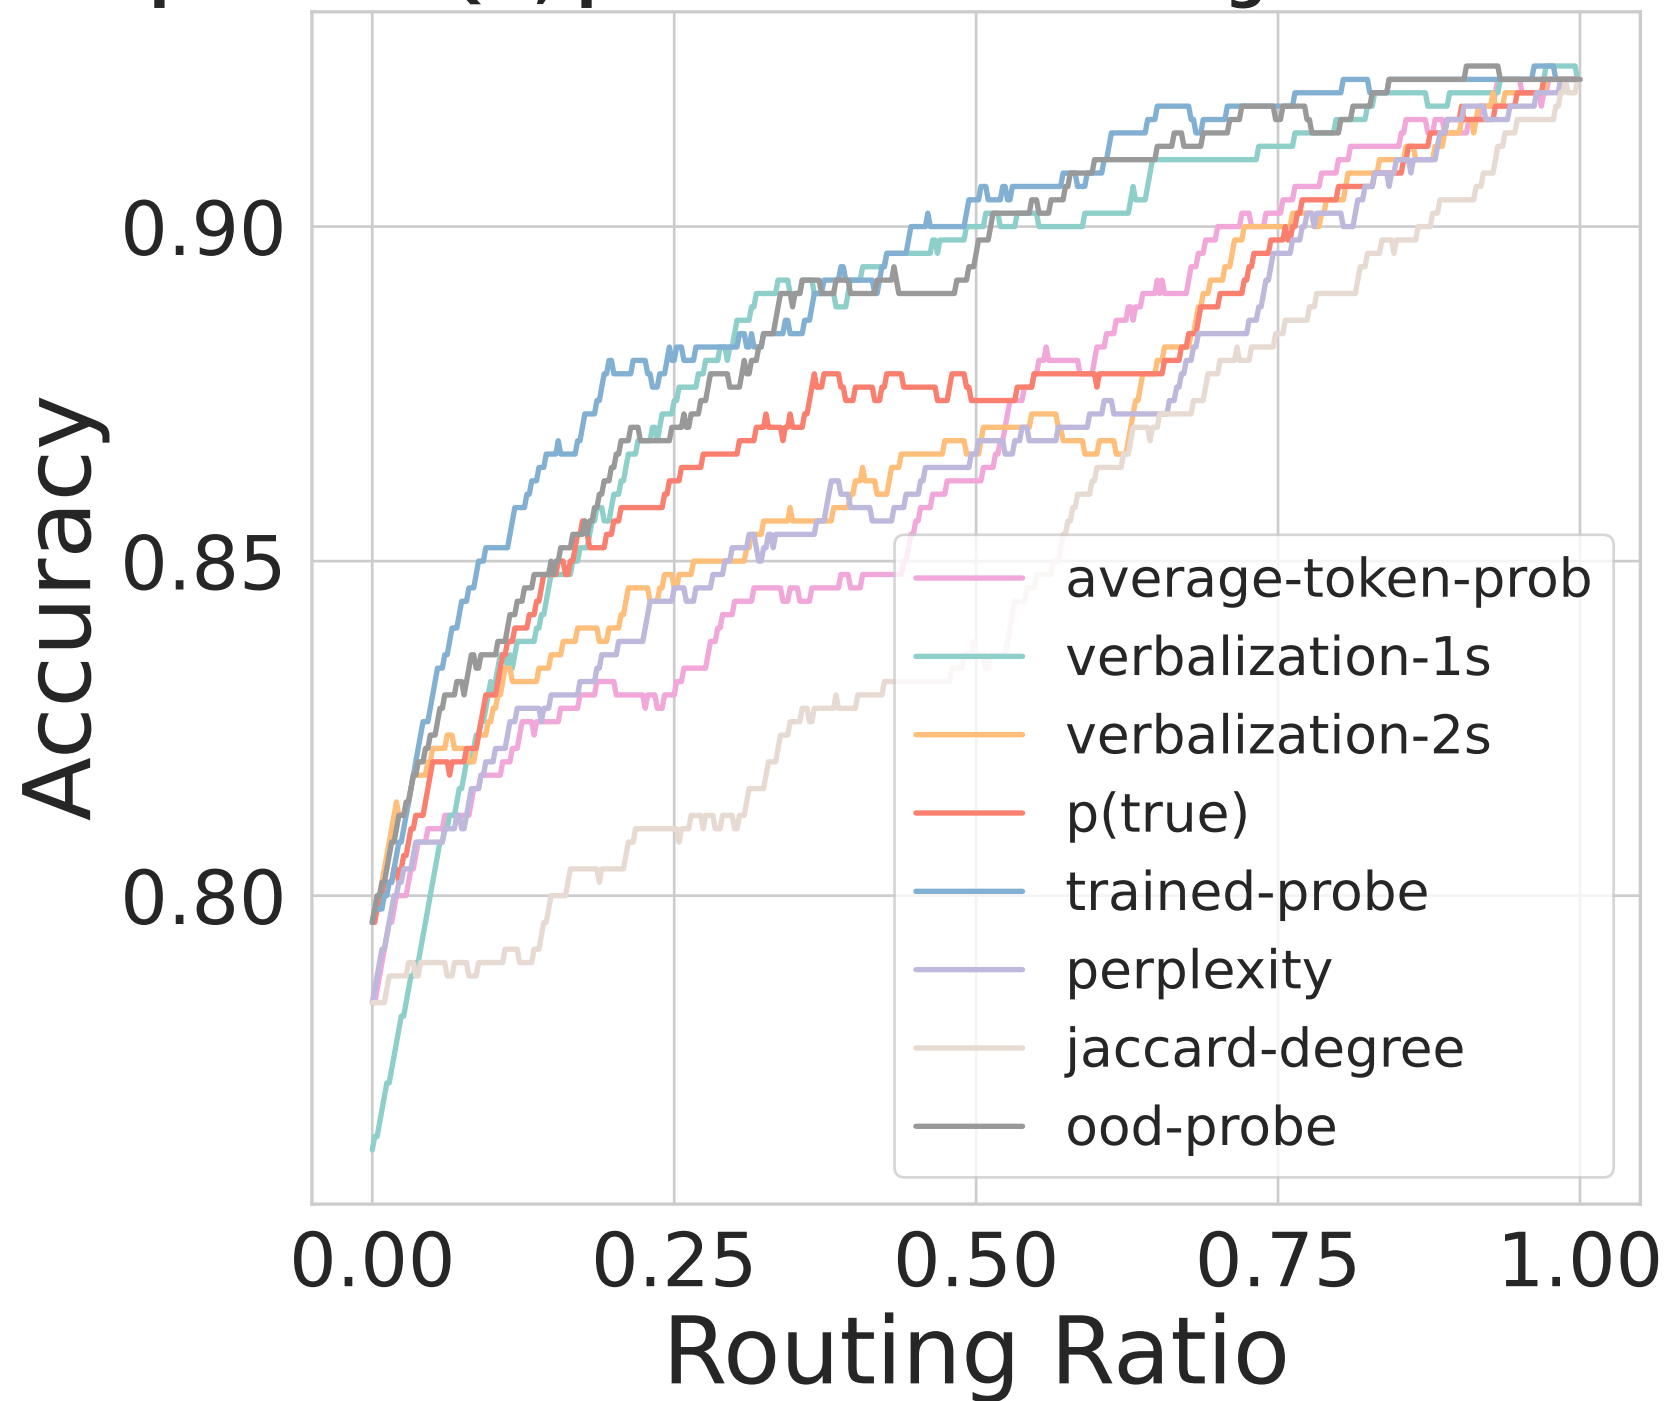

Supplement: supplementary_material [file rr_acc_openbook_qa_phi-4-mini-reasoning_llama70.pdf › Routing_SLM_LLMs/Uncertainty-based Routing/w_legend/to_llama70/rr_acc_openbook_qa_phi-4-mini-reasoning_llama70.pdf]

# OpenBookQA, qwen-2.5-7b to Llama-3.1-70B

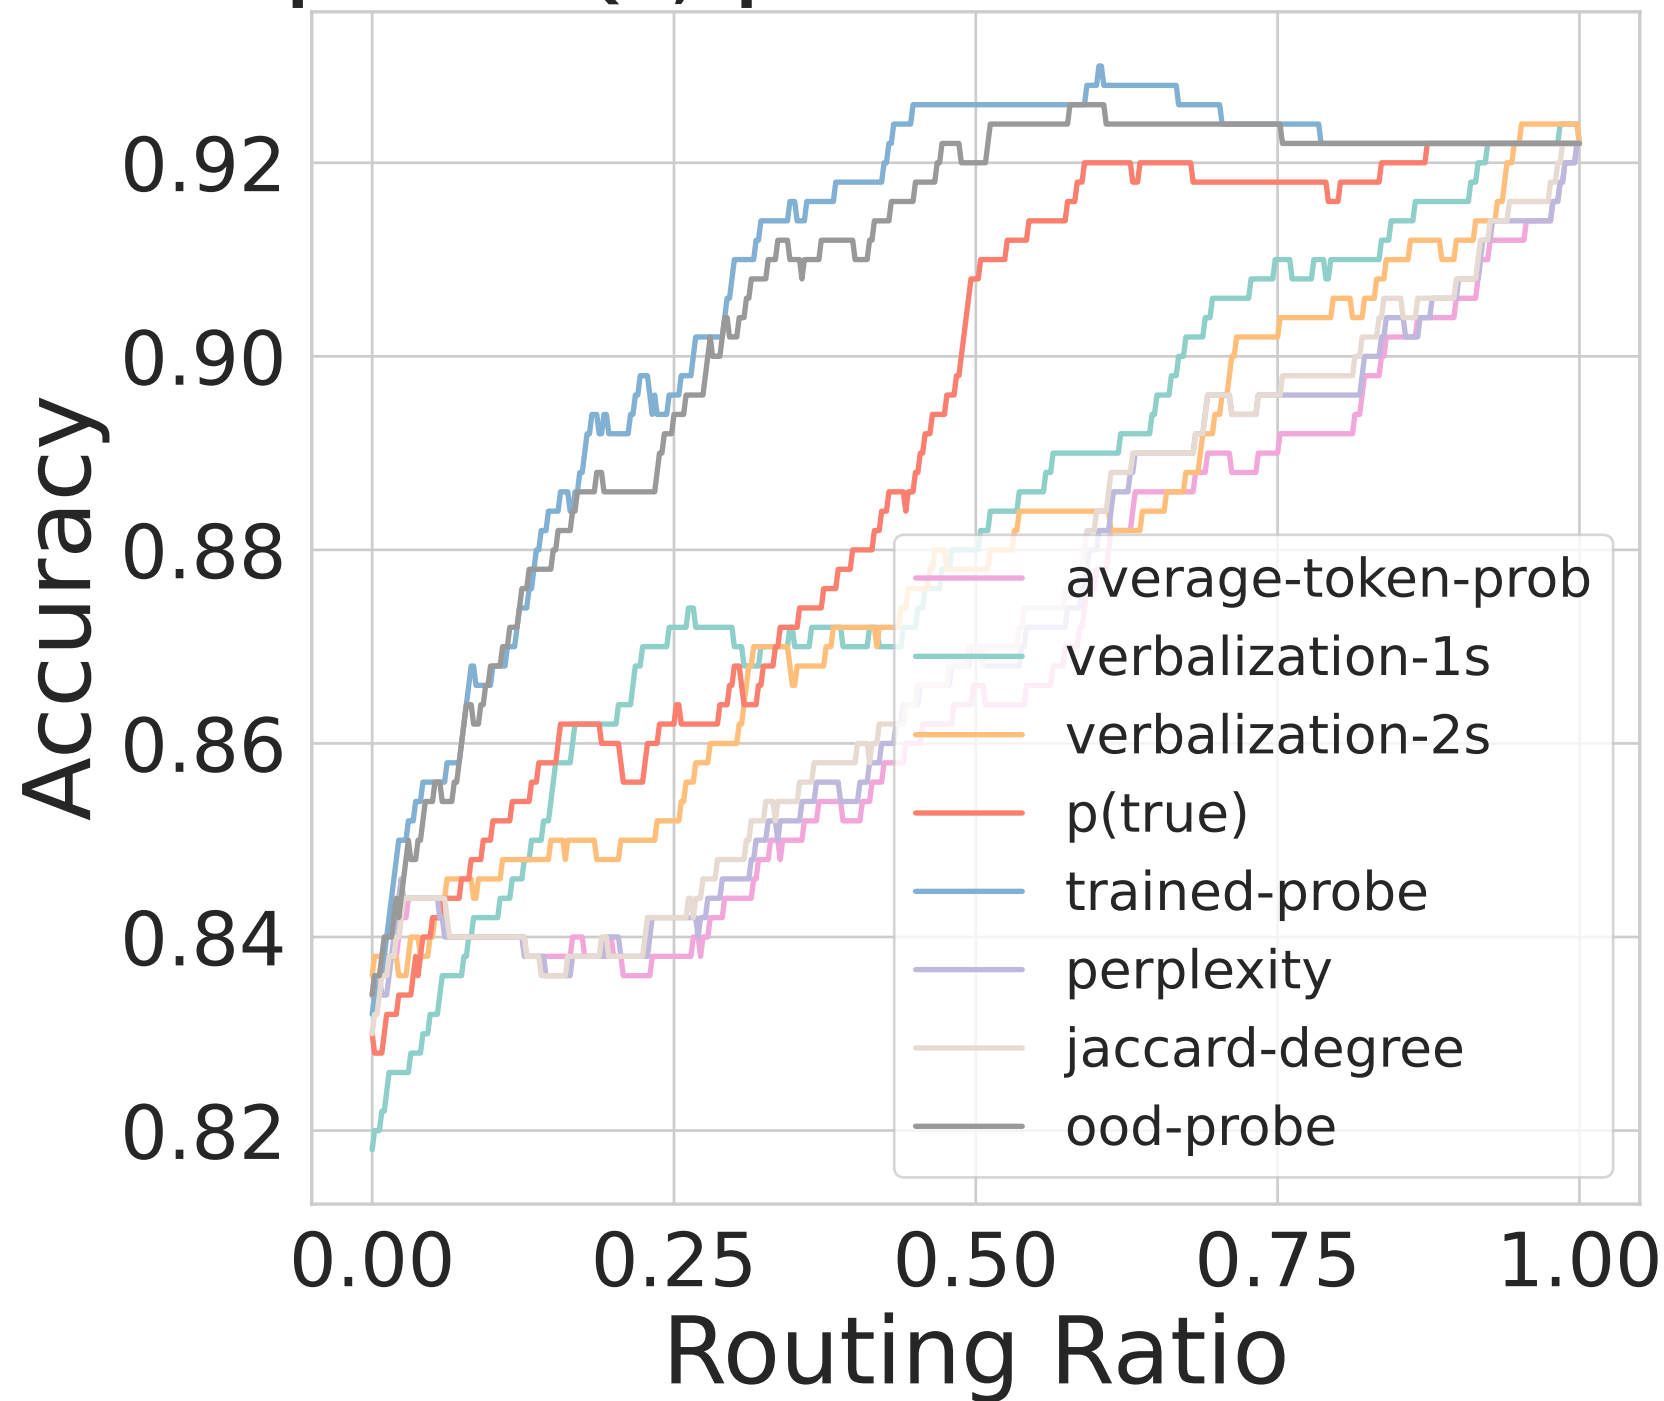

Supplement: supplementary_material [file rr_acc_openbook_qa_qwen-2.5-7b_llama70.pdf › Routing_SLM_LLMs/Uncertainty-based Routing/w_legend/to_llama70/rr_acc_openbook_qa_qwen-2.5-7b_llama70.pdf]

# OpenBookQA, rwkv to Llama-3.1-70B

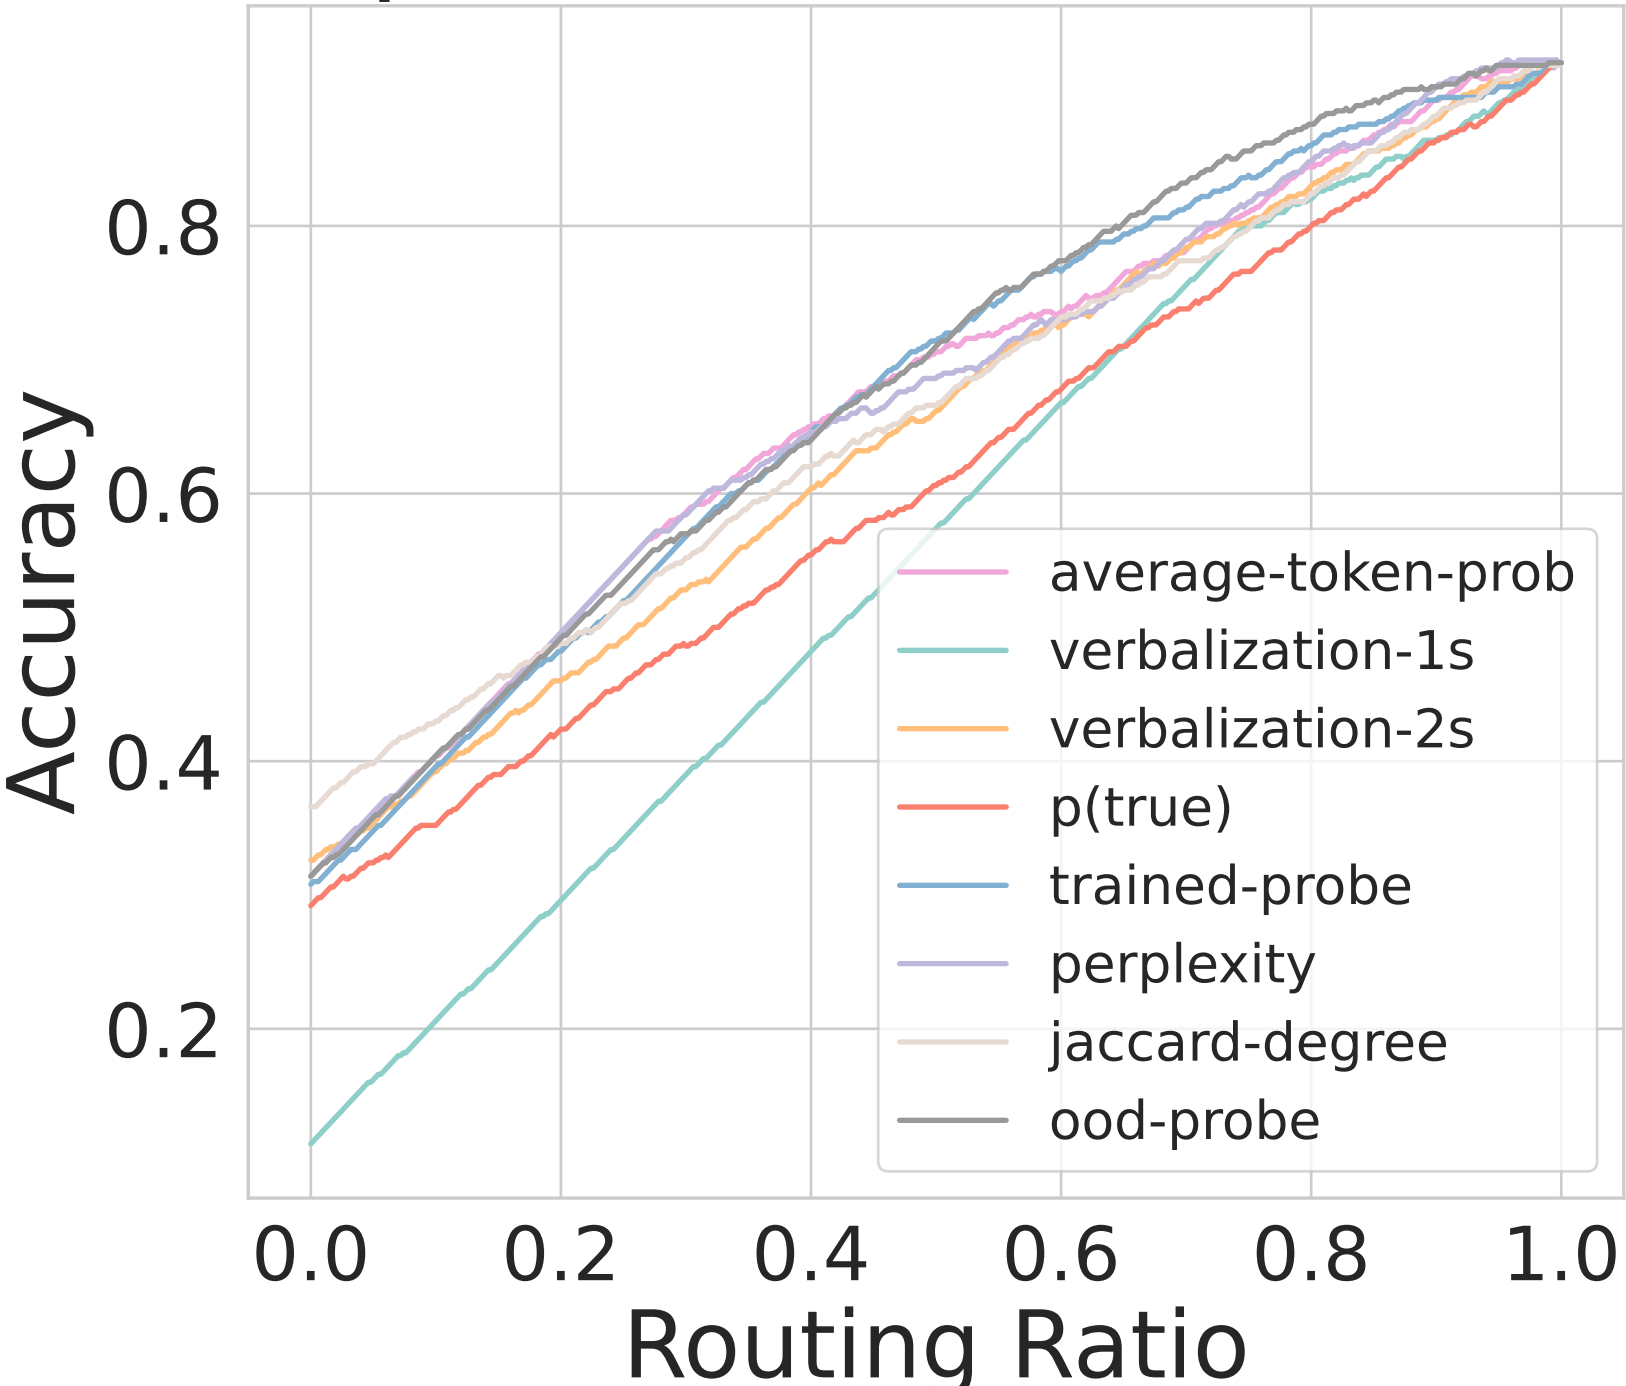

Supplement: supplementary_material [file rr_acc_openbook_qa_rwkv_llama70.pdf › Routing_SLM_LLMs/Uncertainty-based Routing/w_legend/to_llama70/rr_acc_openbook_qa_rwkv_llama70.pdf]

**PIQA, Qwen3-0.6B to Llama-3.1-70B**

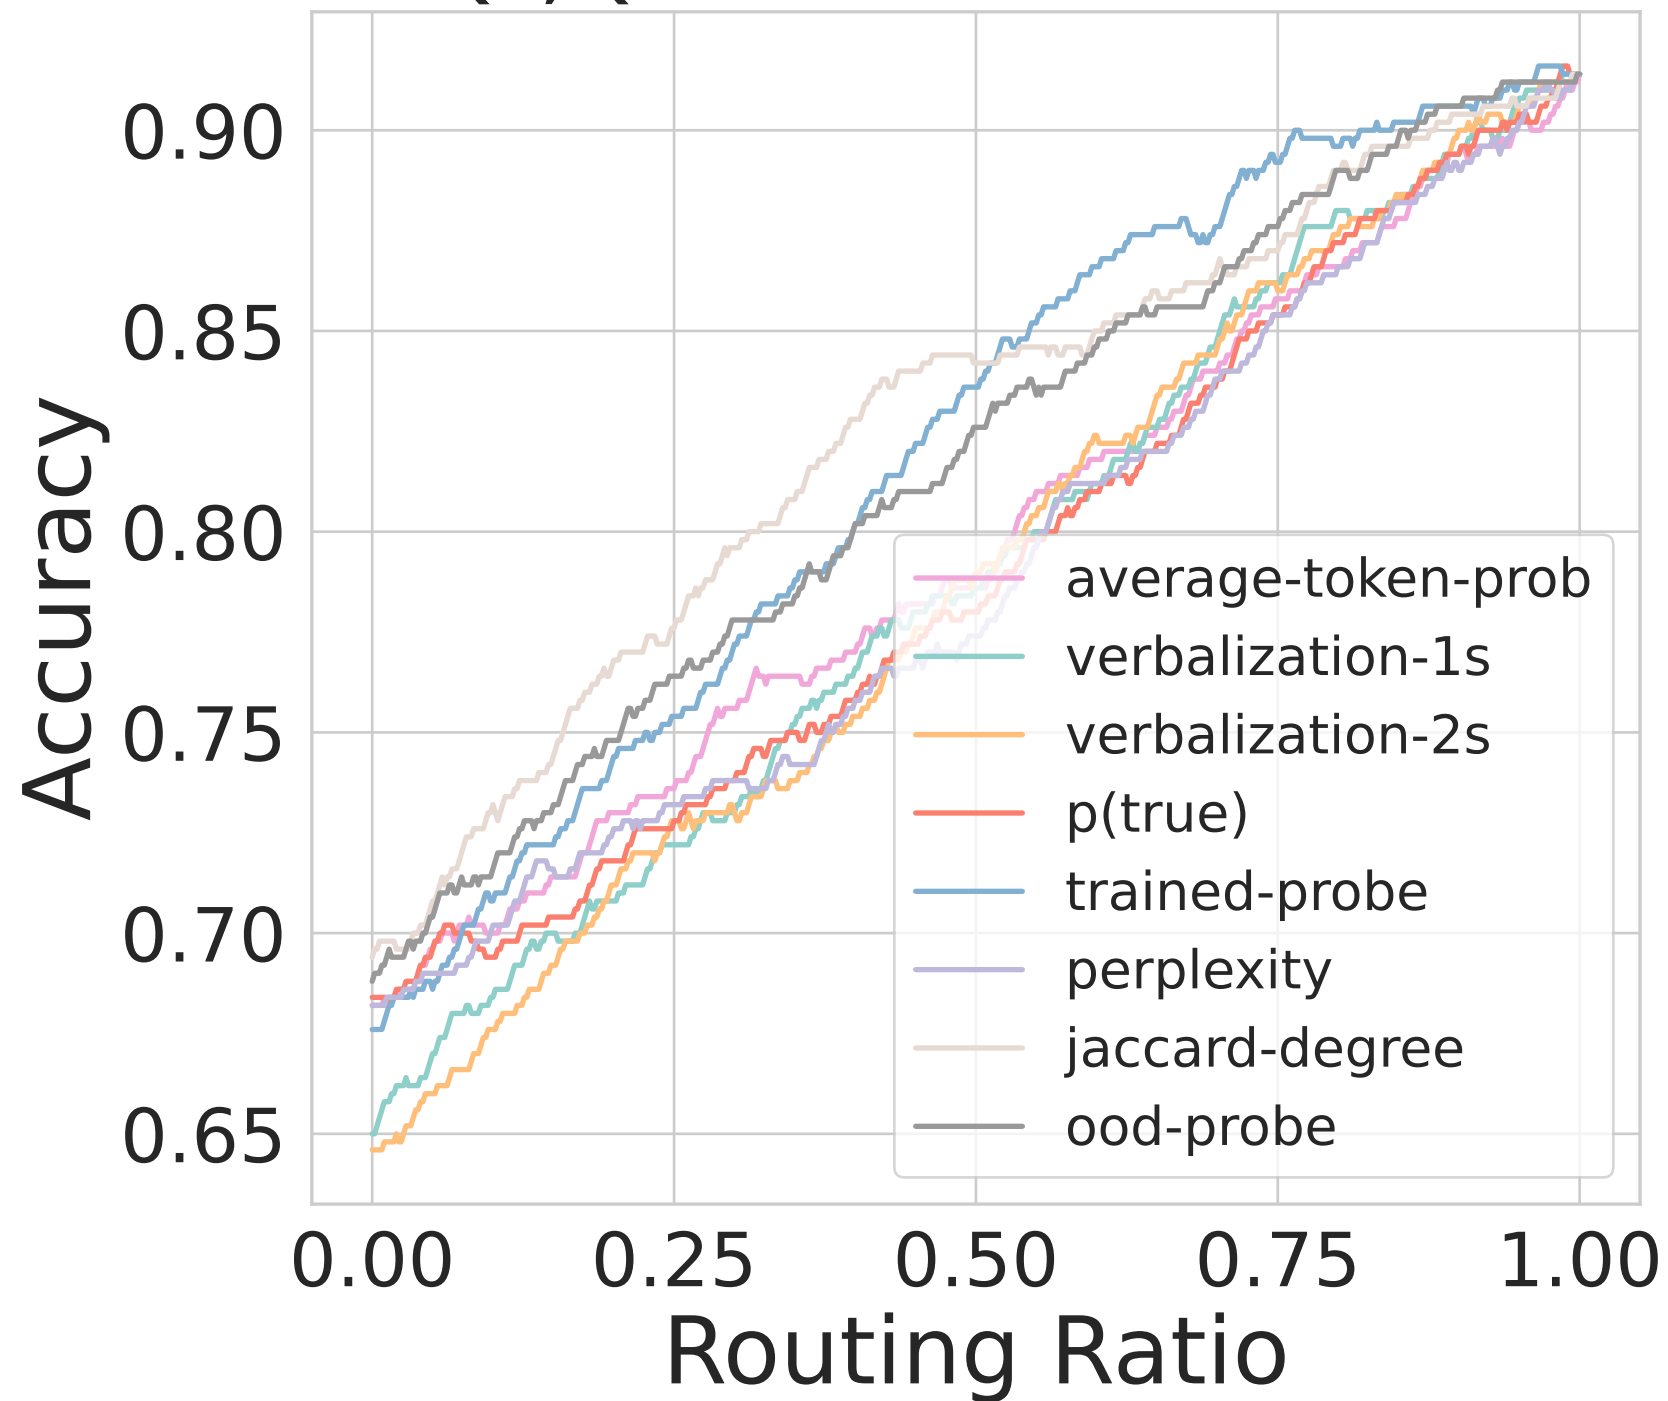

Supplement: supplementary_material [file rr_acc_pi_qa_Qwen3-0.6B_llama70.pdf › Routing_SLM_LLMs/Uncertainty-based Routing/w_legend/to_llama70/rr_acc_pi_qa_Qwen3-0.6B_llama70.pdf]

**PIQA, Qwen3-1.7B to Llama-3.1-70B**

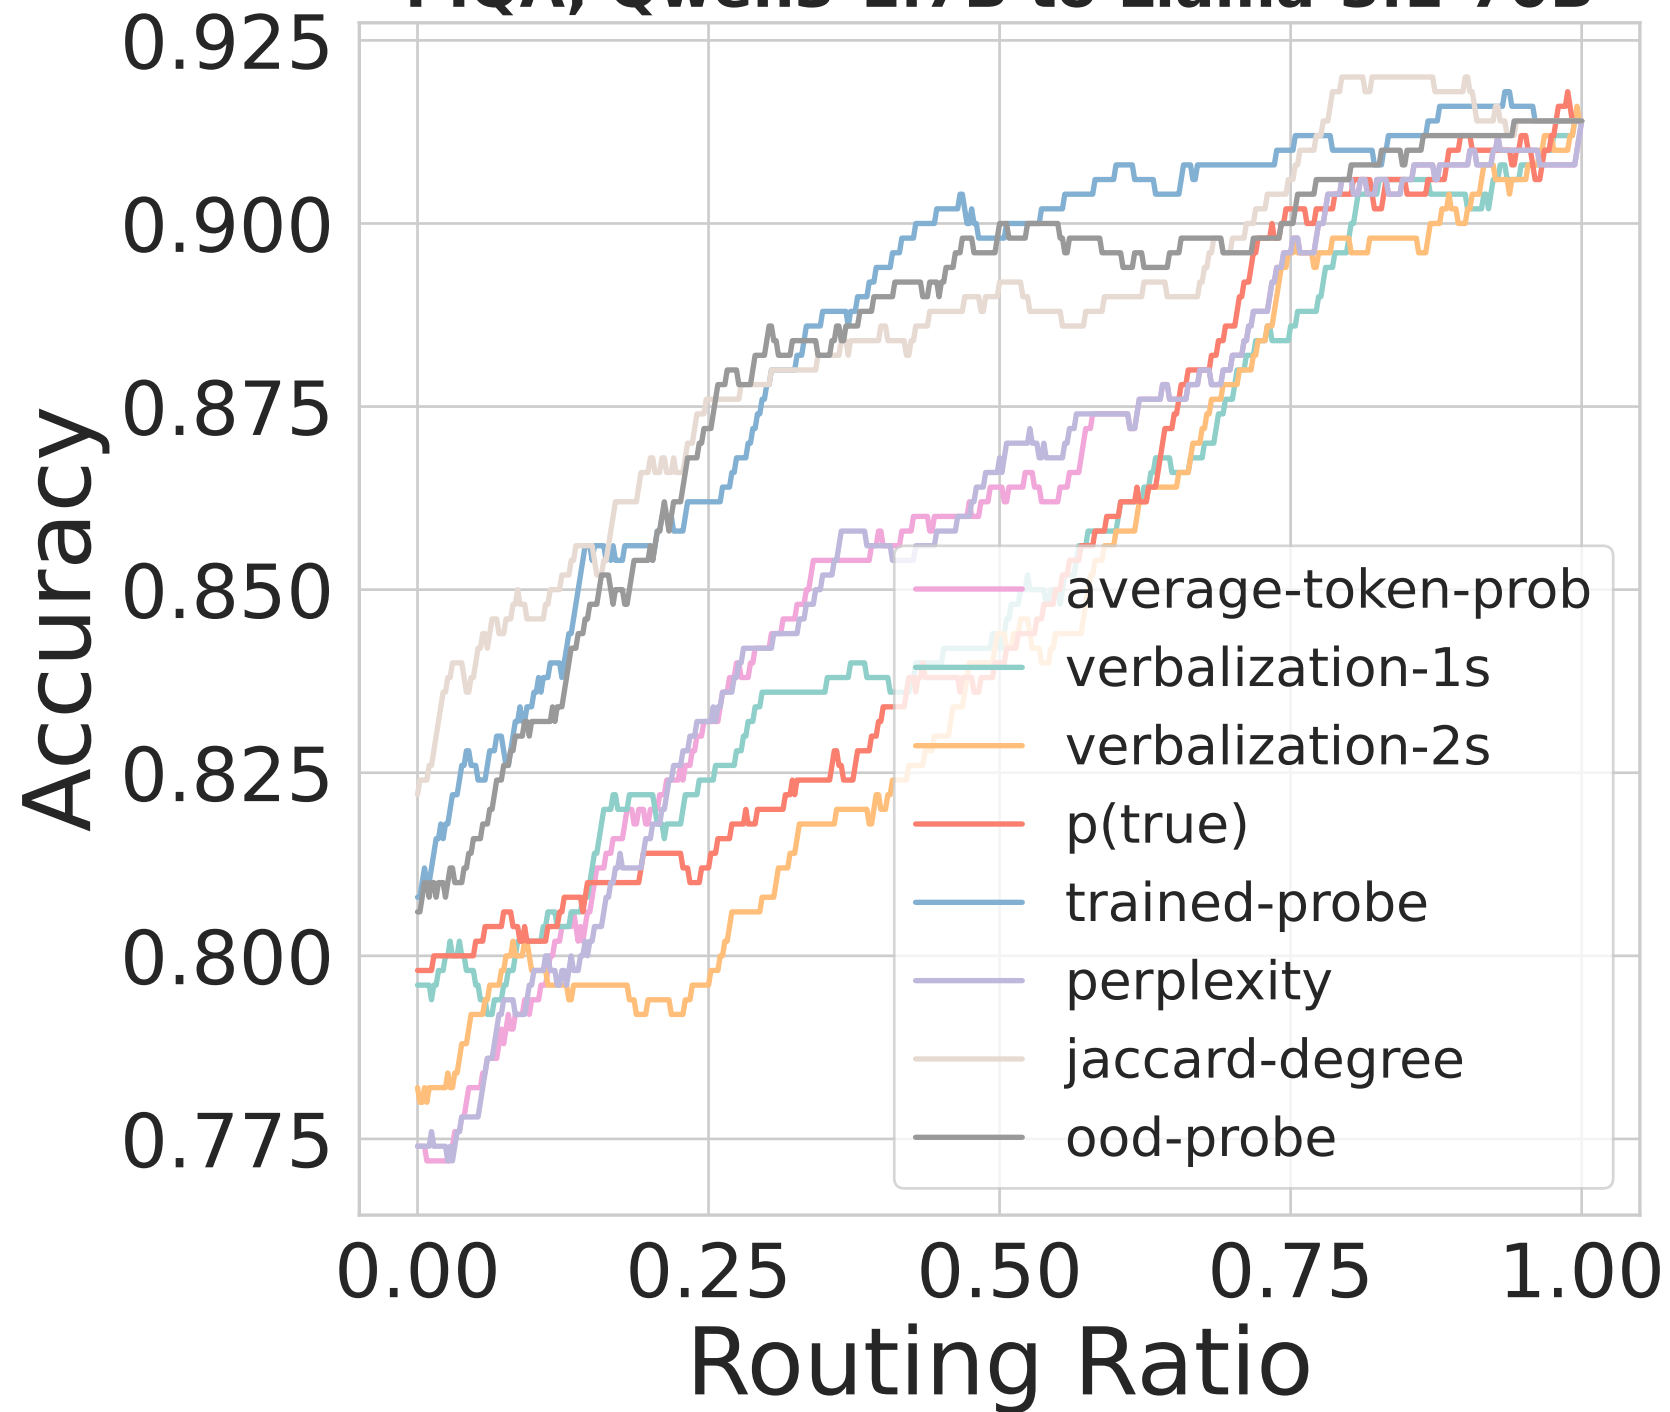

Supplement: supplementary_material [file rr_acc_pi_qa_Qwen3-1.7B_llama70.pdf › Routing_SLM_LLMs/Uncertainty-based Routing/w_legend/to_llama70/rr_acc_pi_qa_Qwen3-1.7B_llama70.pdf]

## PIQA, Qwen3-4B to Llama-3.1-70B

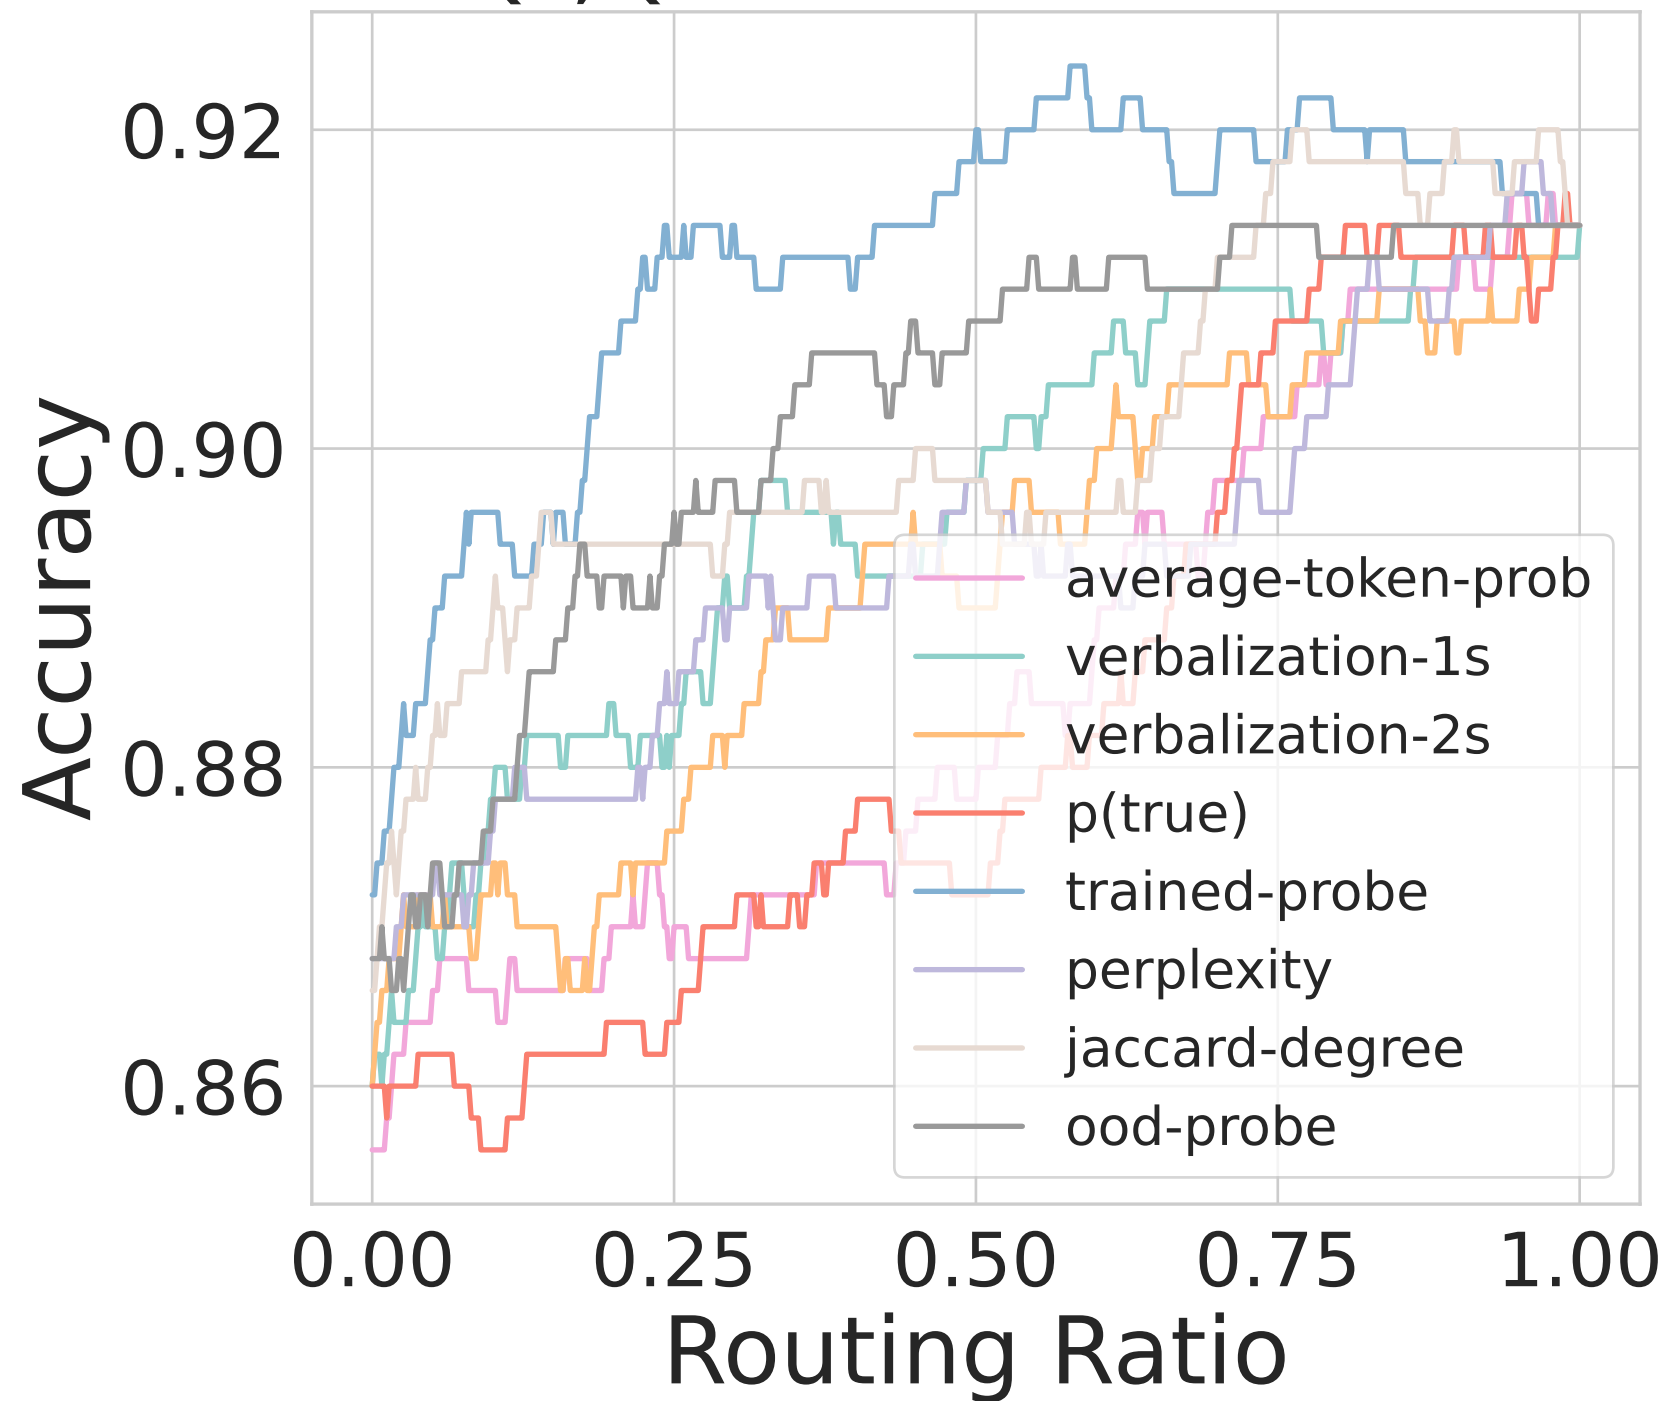

Supplement: supplementary_material [file rr_acc_pi_qa_Qwen3-4B_llama70.pdf › Routing_SLM_LLMs/Uncertainty-based Routing/w_legend/to_llama70/rr_acc_pi_qa_Qwen3-4B_llama70.pdf]

**PIQA, granite-3.1-8b to Llama-3.1-70B**

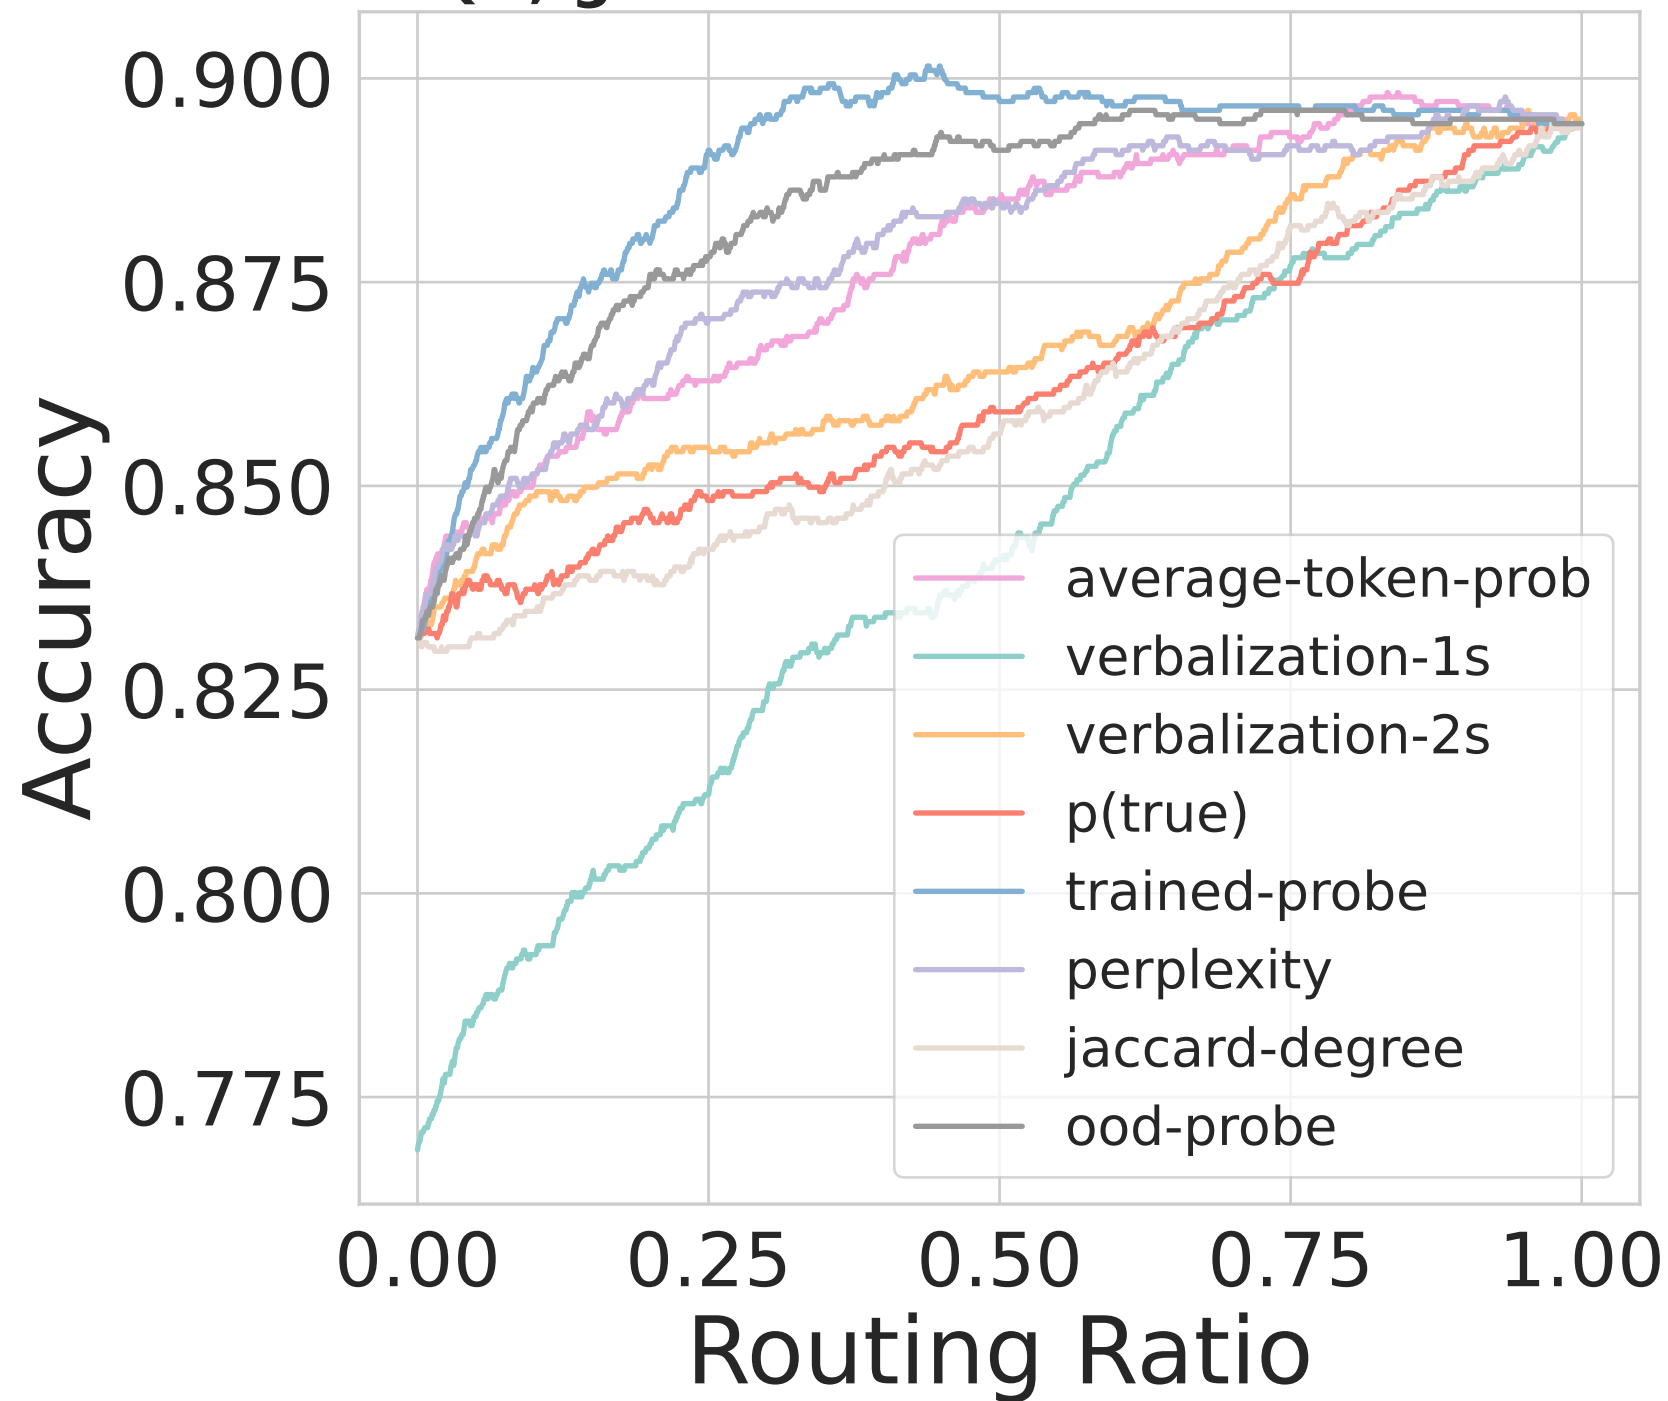

Supplement: supplementary_material [file rr_acc_pi_qa_granite-3.1-8b_llama70.pdf › Routing_SLM_LLMs/Uncertainty-based Routing/w_legend/to_llama70/rr_acc_pi_qa_granite-3.1-8b_llama70.pdf]

**PIQA, llama-3.1-8b to Llama-3.1-70B**

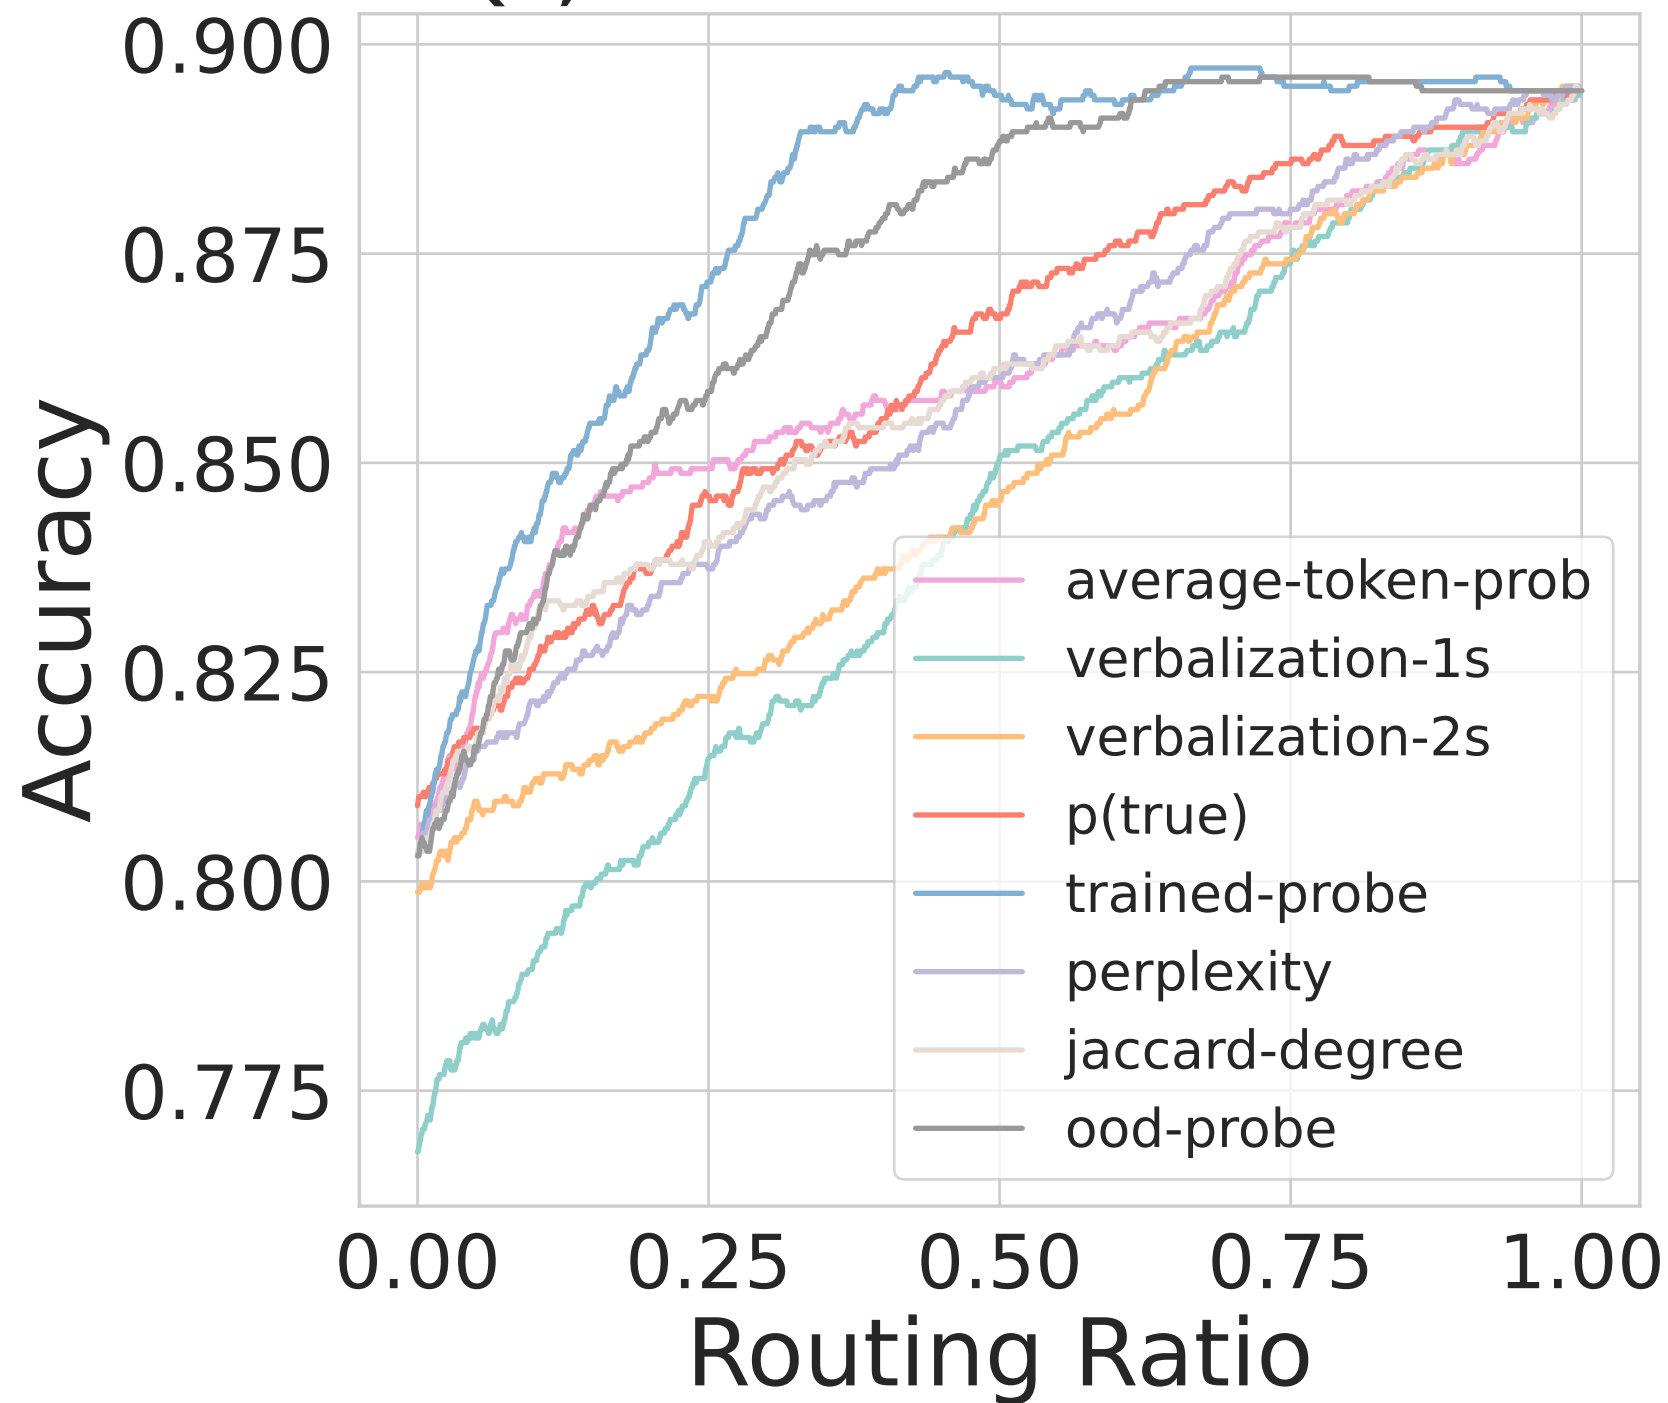

Supplement: supplementary_material [file rr_acc_pi_qa_llama-3.1-8b_llama70.pdf › Routing_SLM_LLMs/Uncertainty-based Routing/w_legend/to_llama70/rr_acc_pi_qa_llama-3.1-8b_llama70.pdf]

## PIQA, llama-3.2-1b to Llama-3.1-70B

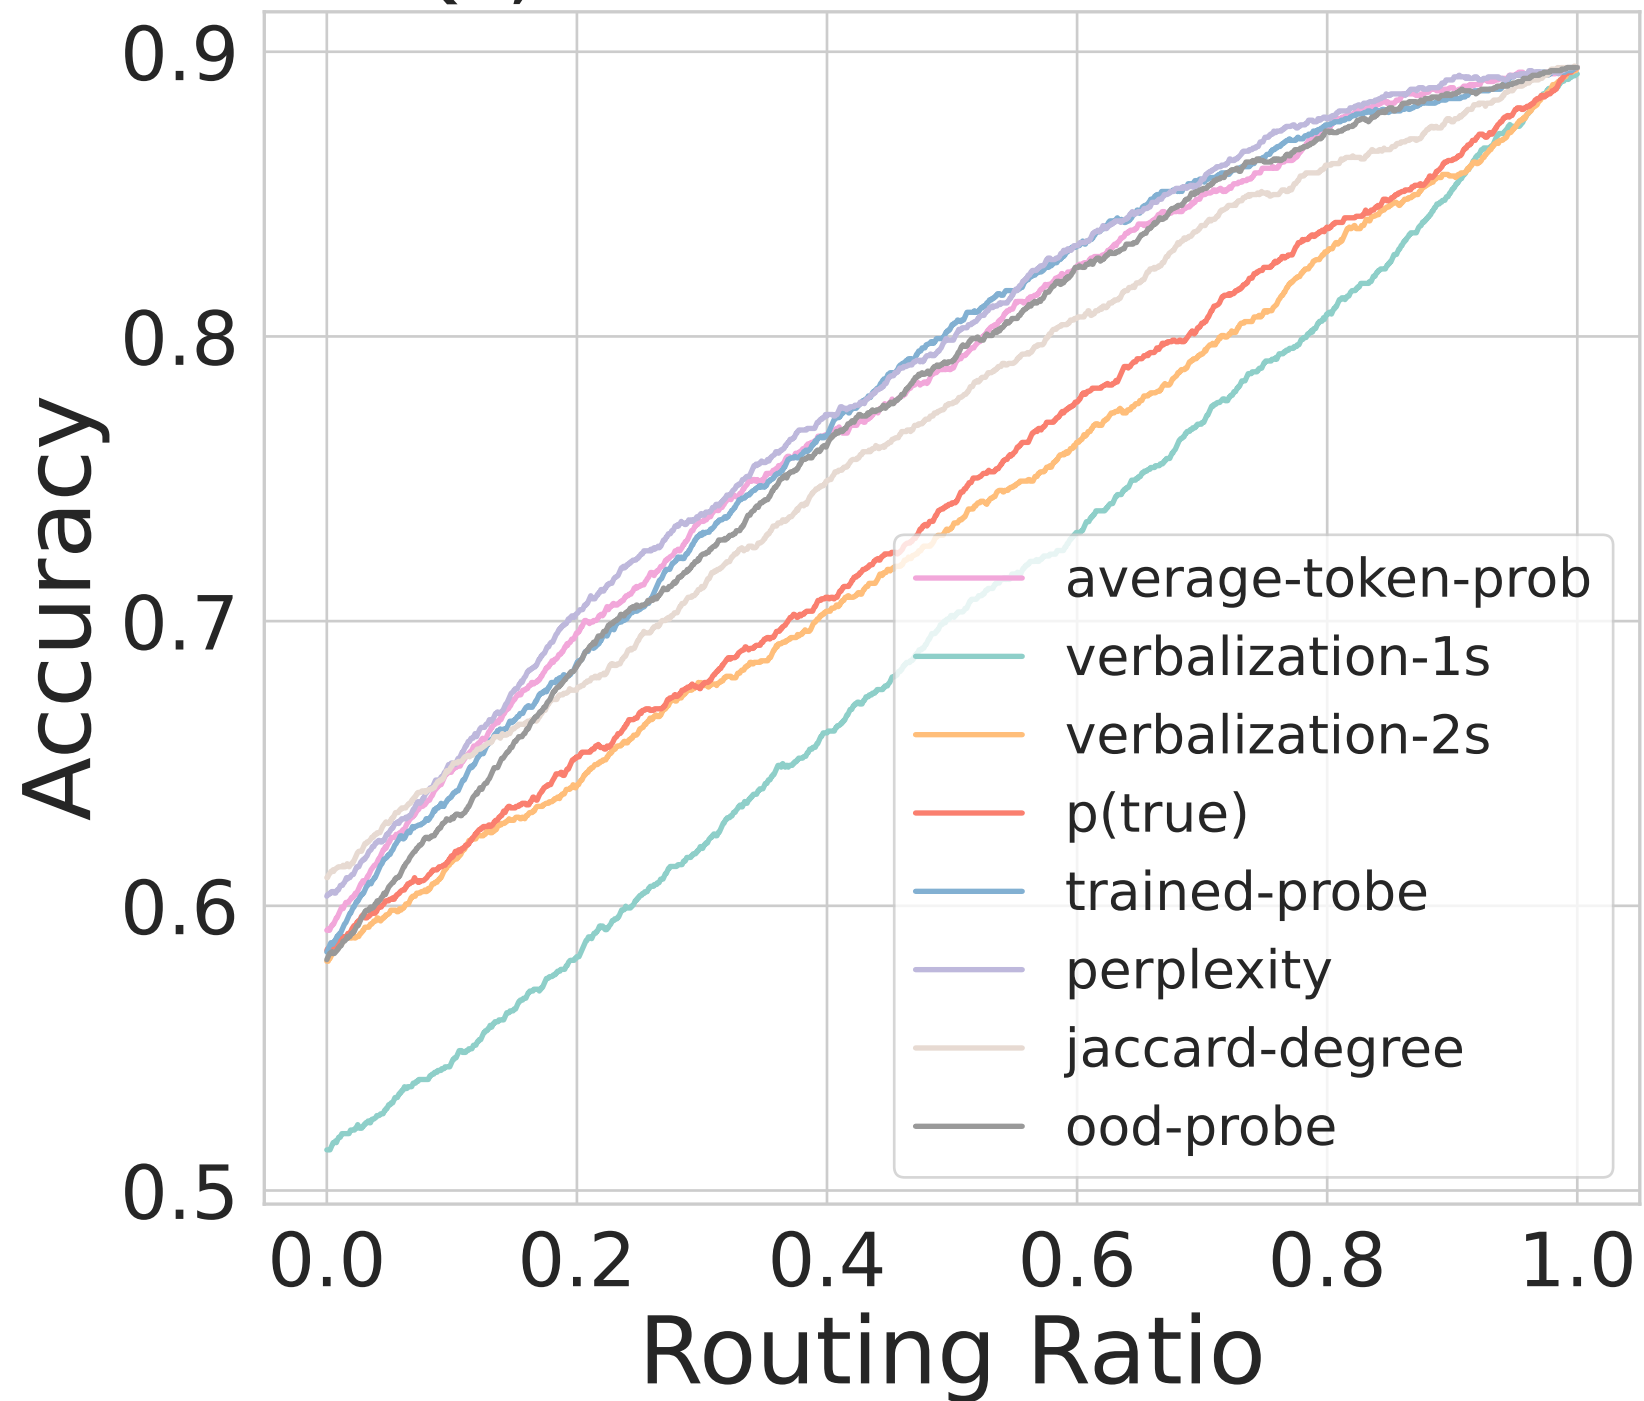

Supplement: supplementary_material [file rr_acc_pi_qa_llama-3.2-1b_llama70.pdf › Routing_SLM_LLMs/Uncertainty-based Routing/w_legend/to_llama70/rr_acc_pi_qa_llama-3.2-1b_llama70.pdf]

**PIQA, llama-3.2-3b to Llama-3.1-70B**

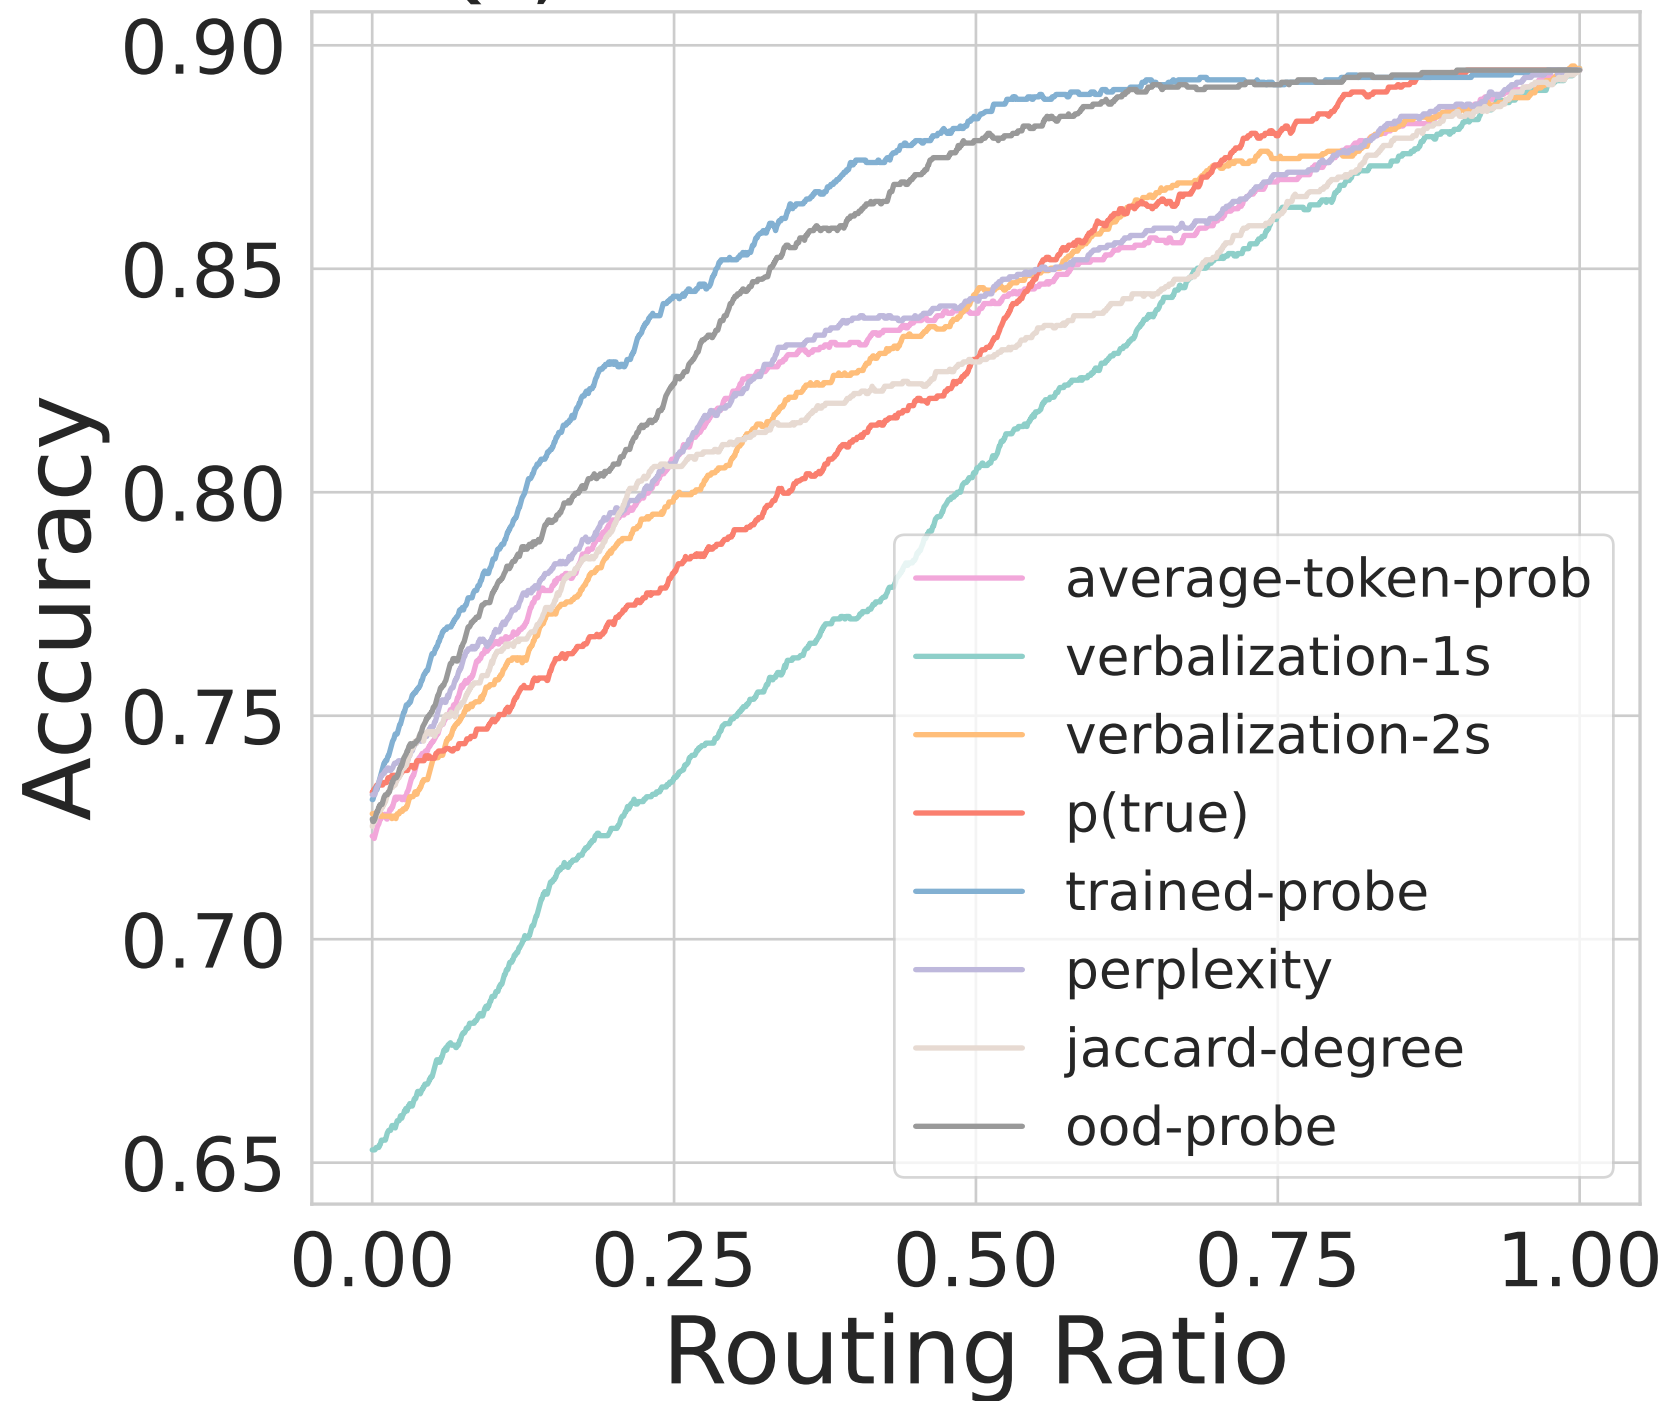

Supplement: supplementary_material [file rr_acc_pi_qa_llama-3.2-3b_llama70.pdf › Routing_SLM_LLMs/Uncertainty-based Routing/w_legend/to_llama70/rr_acc_pi_qa_llama-3.2-3b_llama70.pdf]

**PIQA, mistral-7b to Llama-3.1-70B**

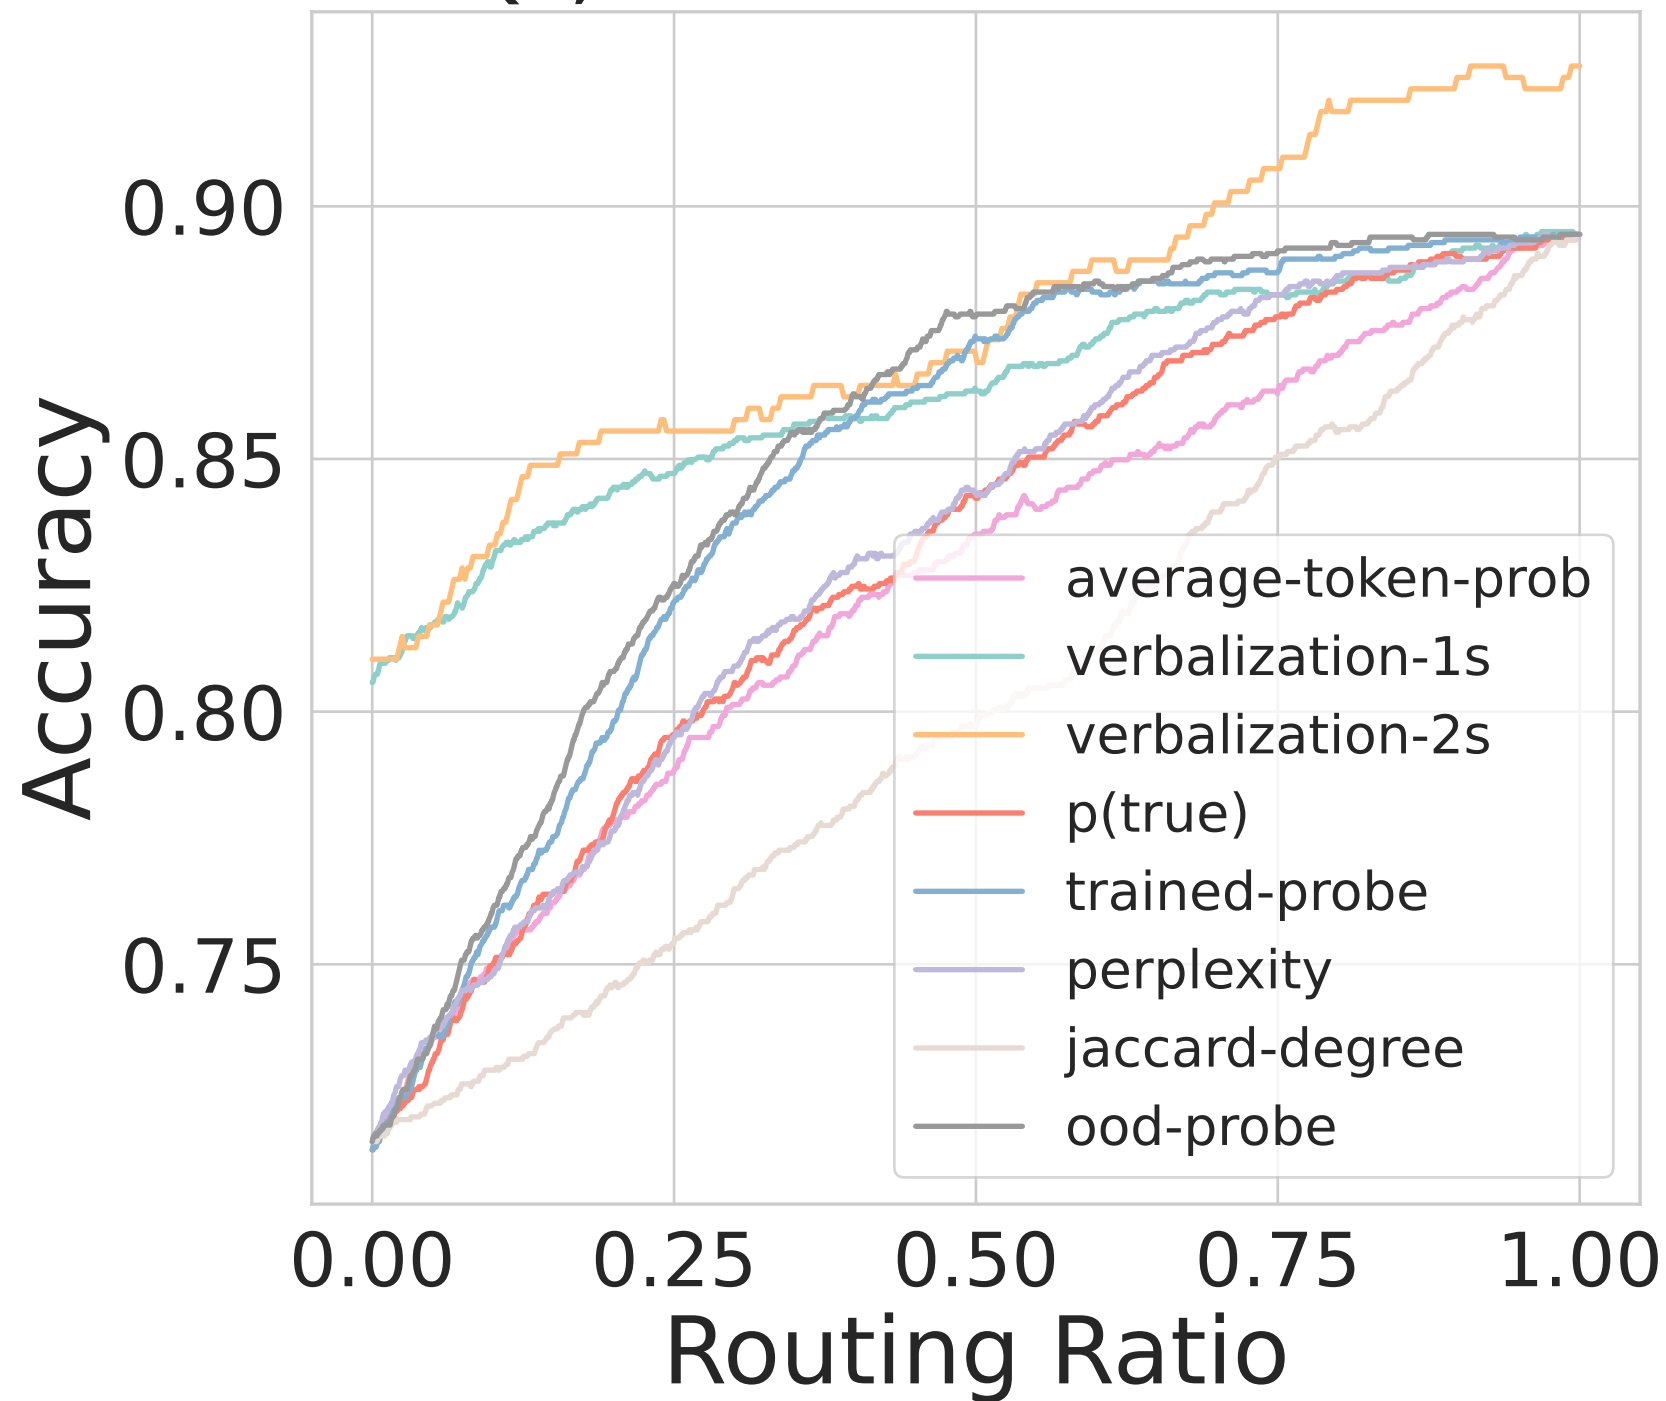

Supplement: supplementary_material [file rr_acc_pi_qa_mistral-7b_llama70.pdf › Routing_SLM_LLMs/Uncertainty-based Routing/w_legend/to_llama70/rr_acc_pi_qa_mistral-7b_llama70.pdf]

## PIQA, phi-3.5-mini to Llama-3.1-70B

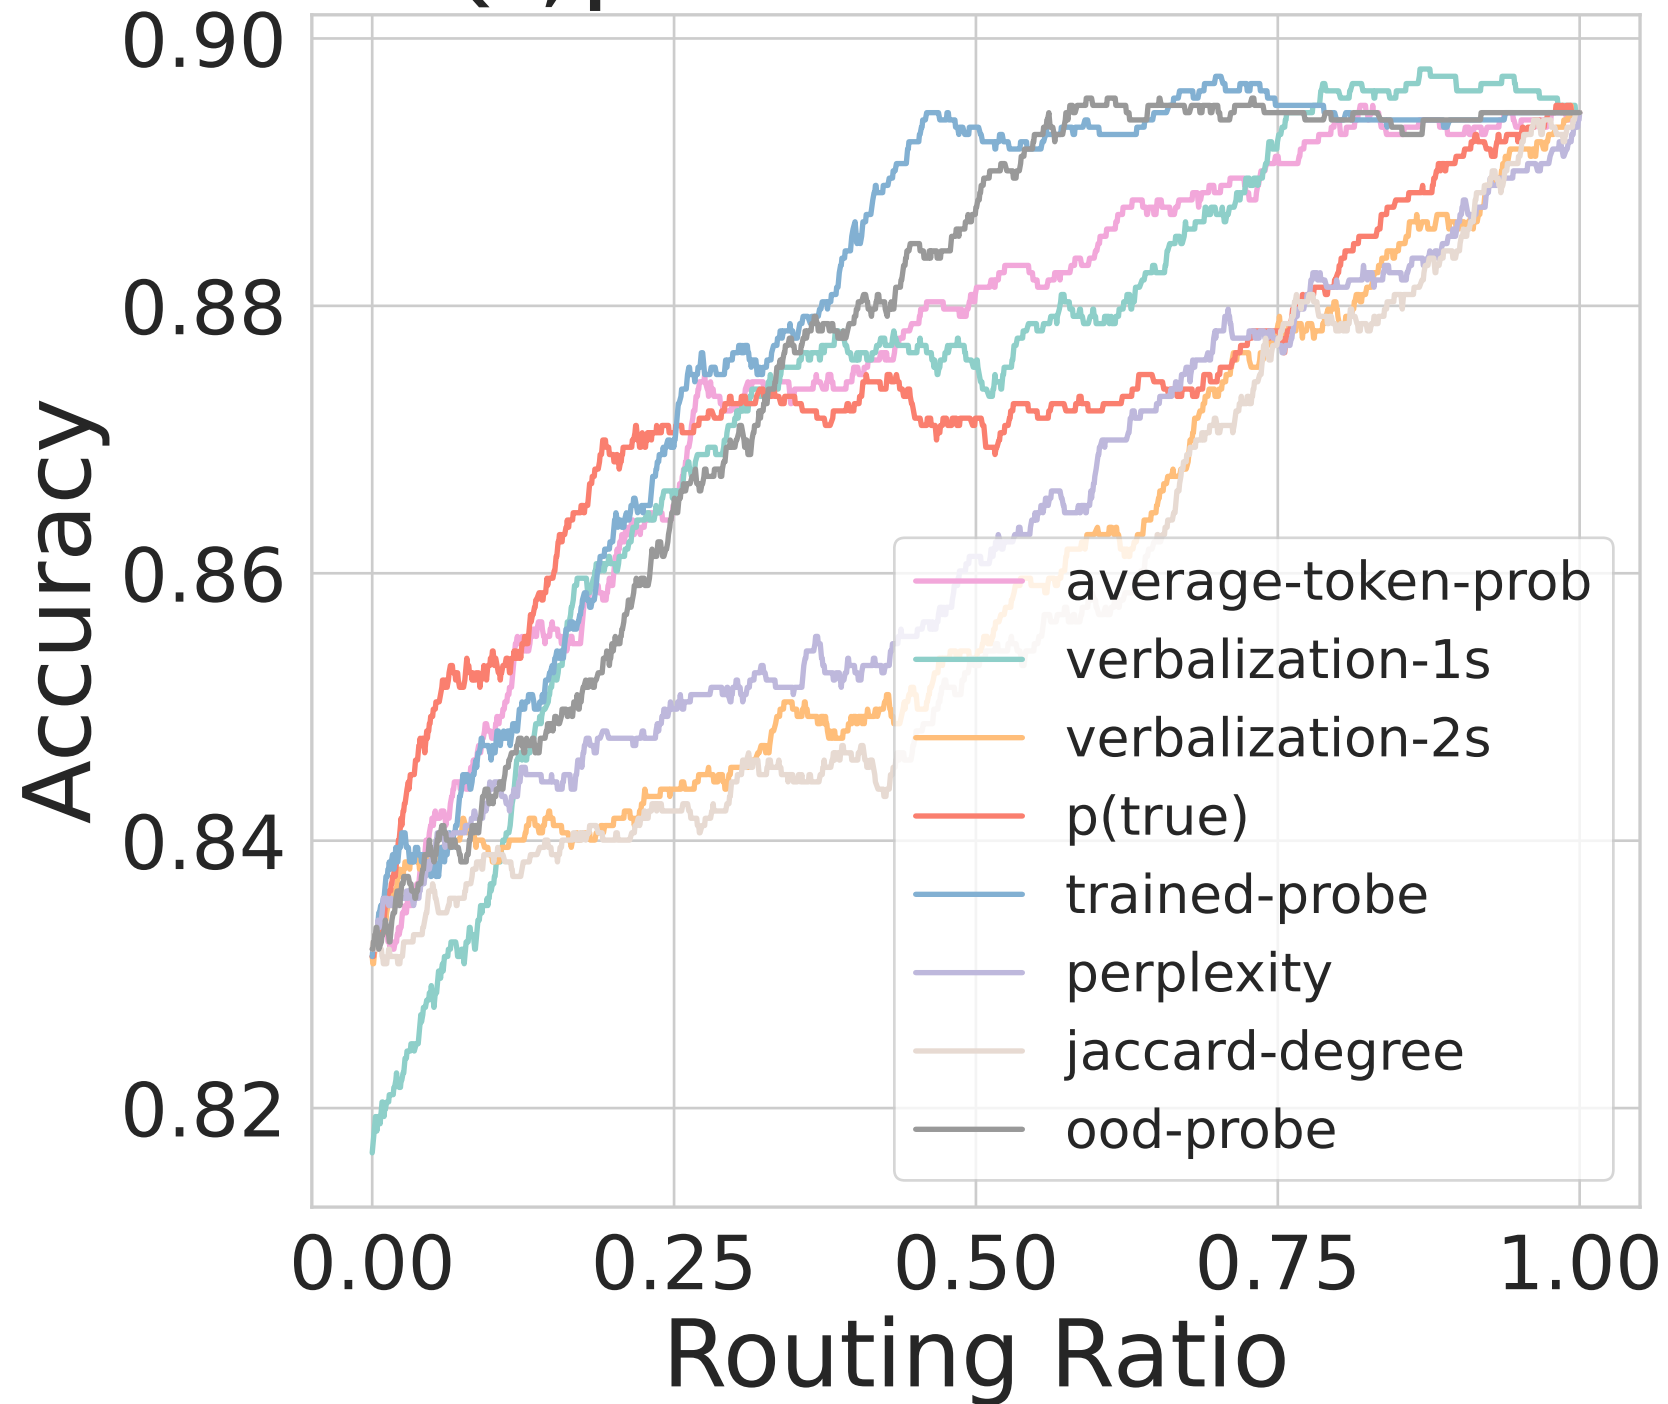

Supplement: supplementary_material [file rr_acc_pi_qa_phi-3.5-mini_llama70.pdf › Routing_SLM_LLMs/Uncertainty-based Routing/w_legend/to_llama70/rr_acc_pi_qa_phi-3.5-mini_llama70.pdf]

# PIQA, qwen-2.5-7b to Llama-3.1-70B

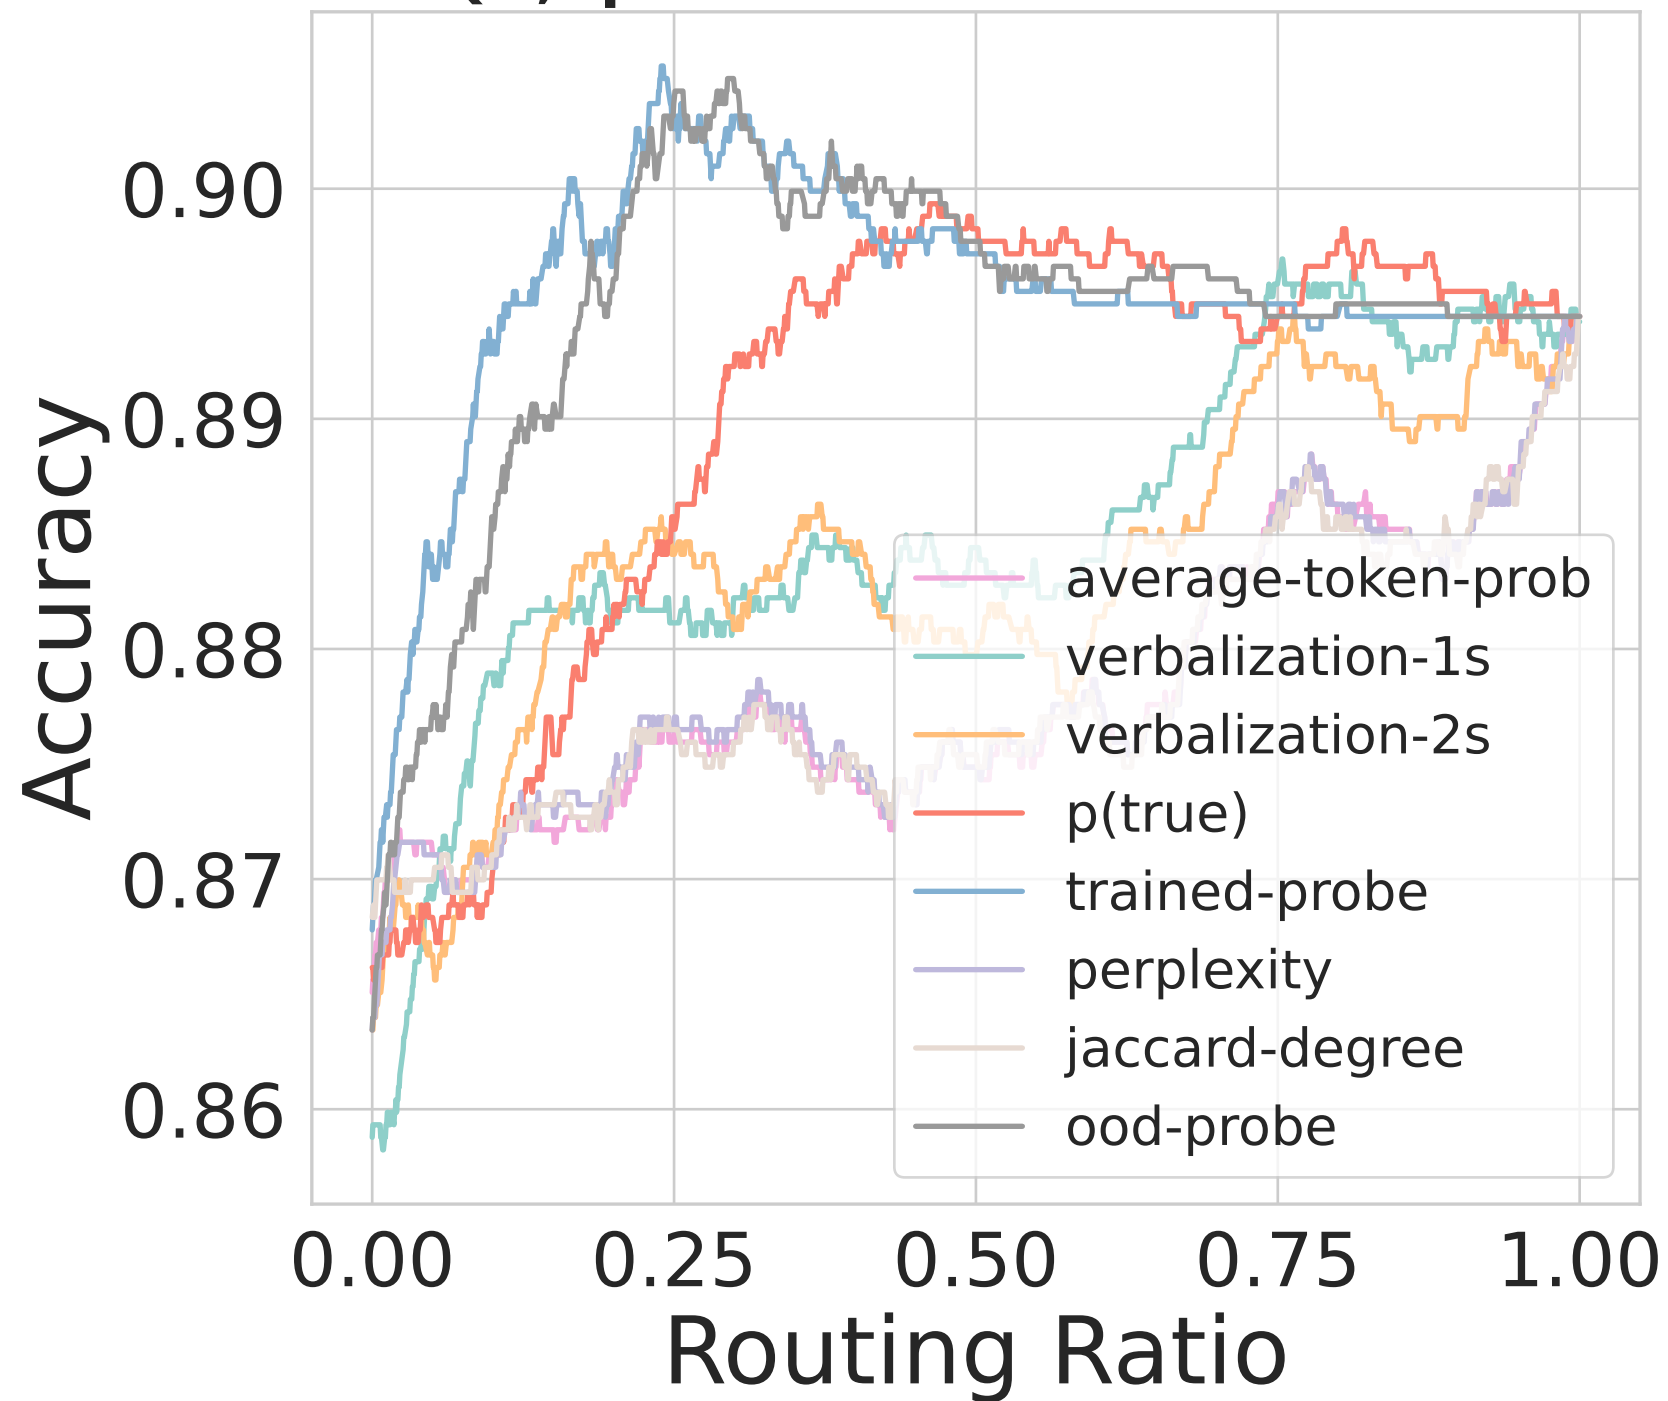

Supplement: supplementary_material [file rr_acc_pi_qa_qwen-2.5-7b_llama70.pdf › Routing_SLM_LLMs/Uncertainty-based Routing/w_legend/to_llama70/rr_acc_pi_qa_qwen-2.5-7b_llama70.pdf]

# PIQA, rwkv to Llama-3.1-70B

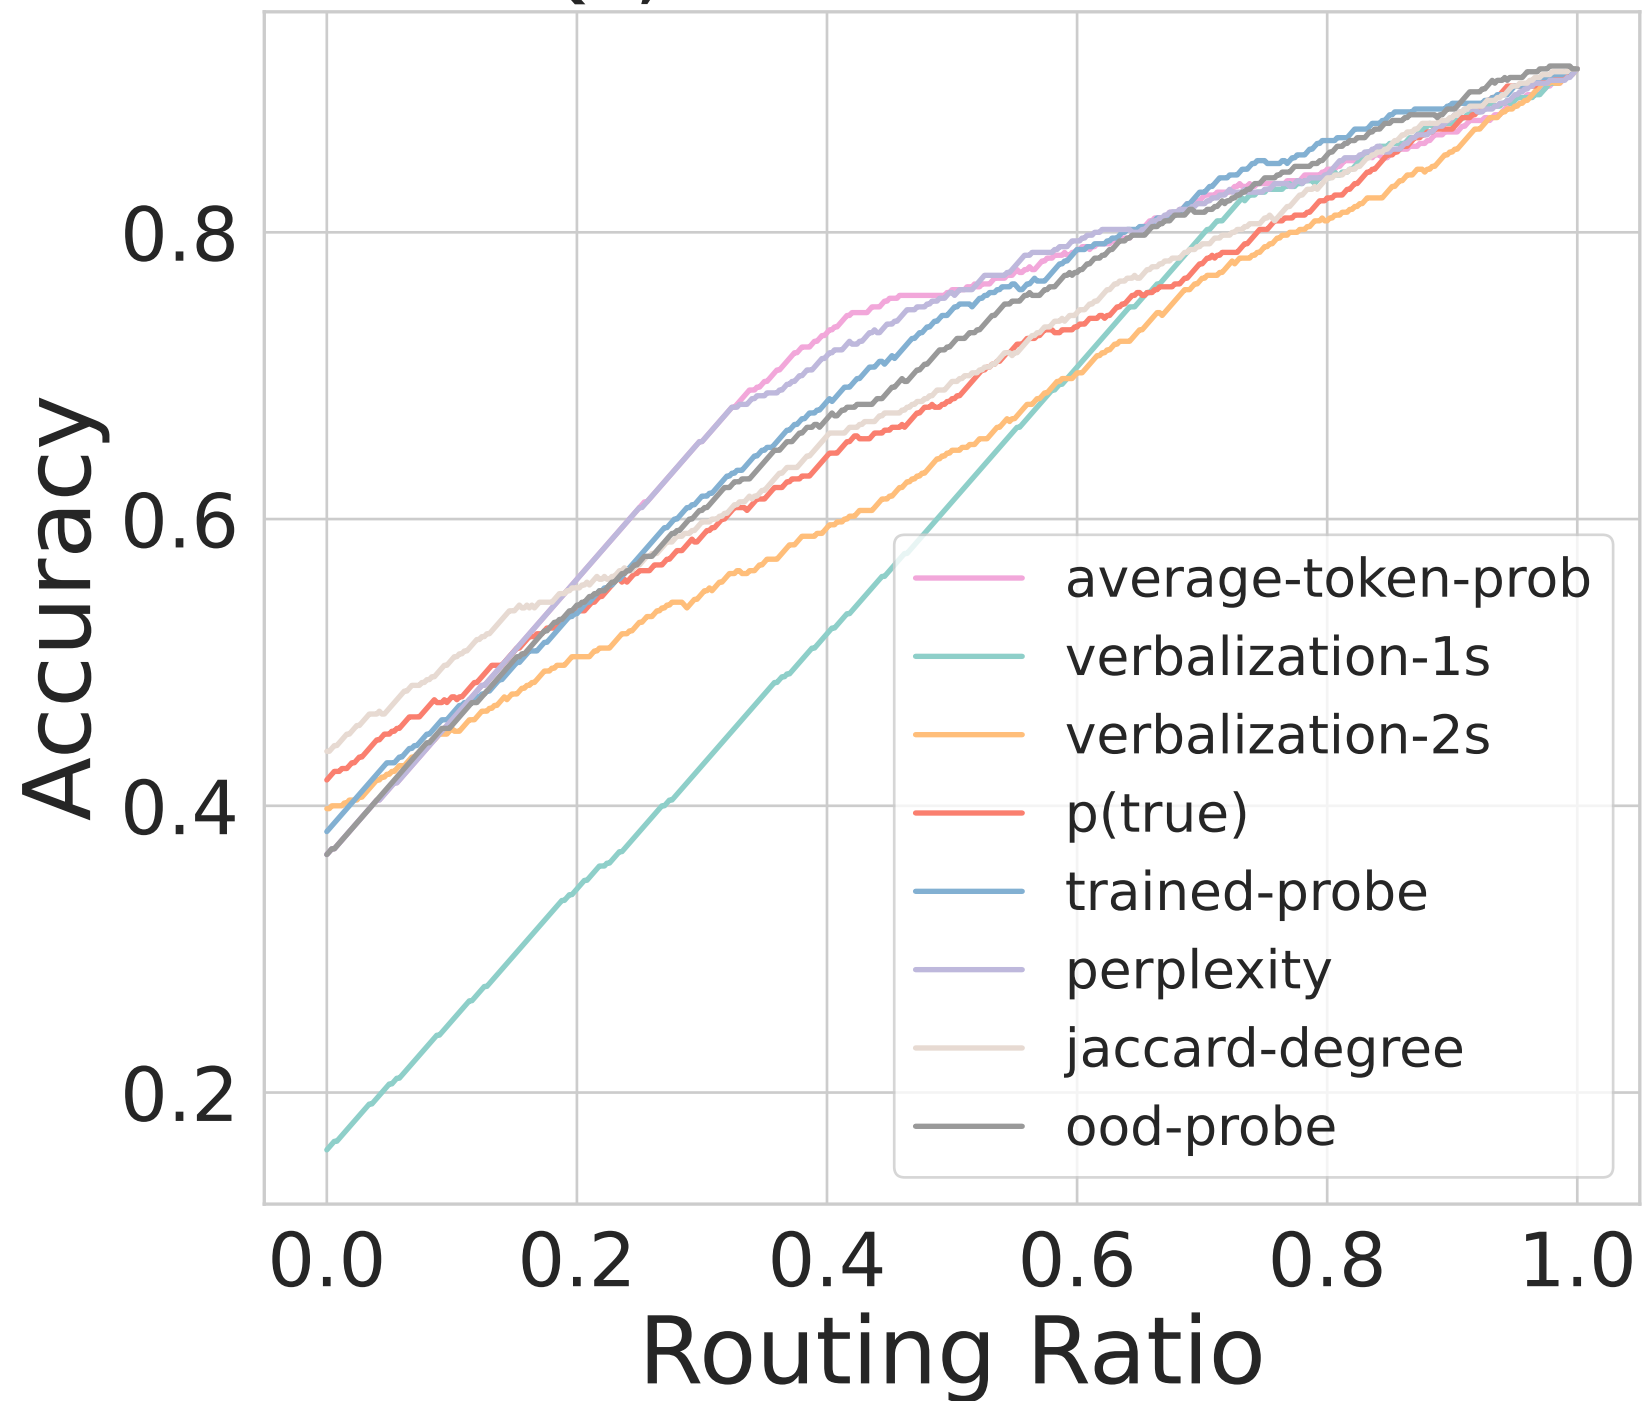

Supplement: supplementary_material [file rr_acc_pi_qa_rwkv_llama70.pdf › Routing_SLM_LLMs/Uncertainty-based Routing/w_legend/to_llama70/rr_acc_pi_qa_rwkv_llama70.pdf]

## Social IQa, Qwen3-0.6B to Llama-3.1-70B

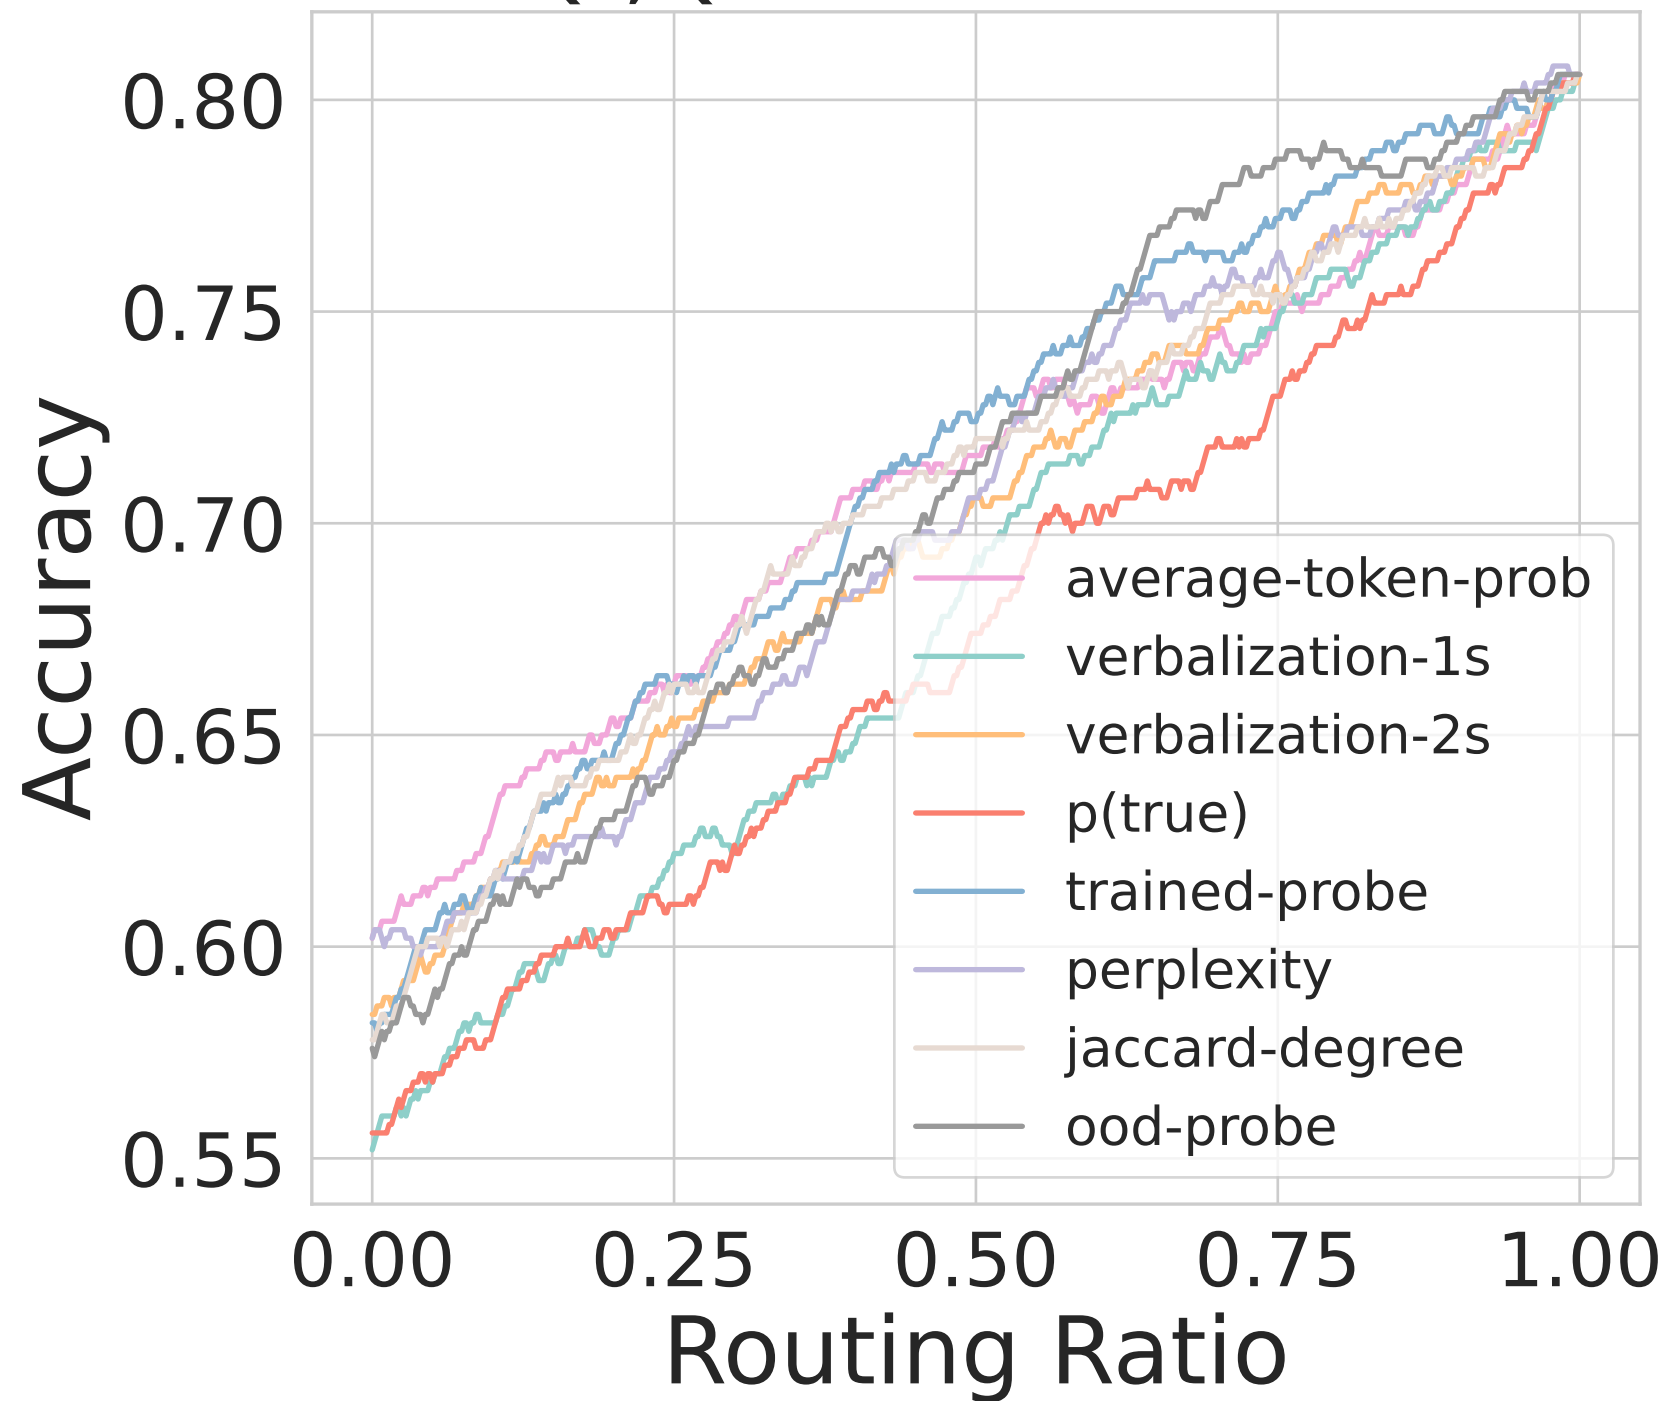

Supplement: supplementary_material [file rr_acc_social_i_qa_Qwen3-0.6B_llama70.pdf › Routing_SLM_LLMs/Uncertainty-based Routing/w_legend/to_llama70/rr_acc_social_i_qa_Qwen3-0.6B_llama70.pdf]

## Social IQa, Qwen3-1.7B to Llama-3.1-70B

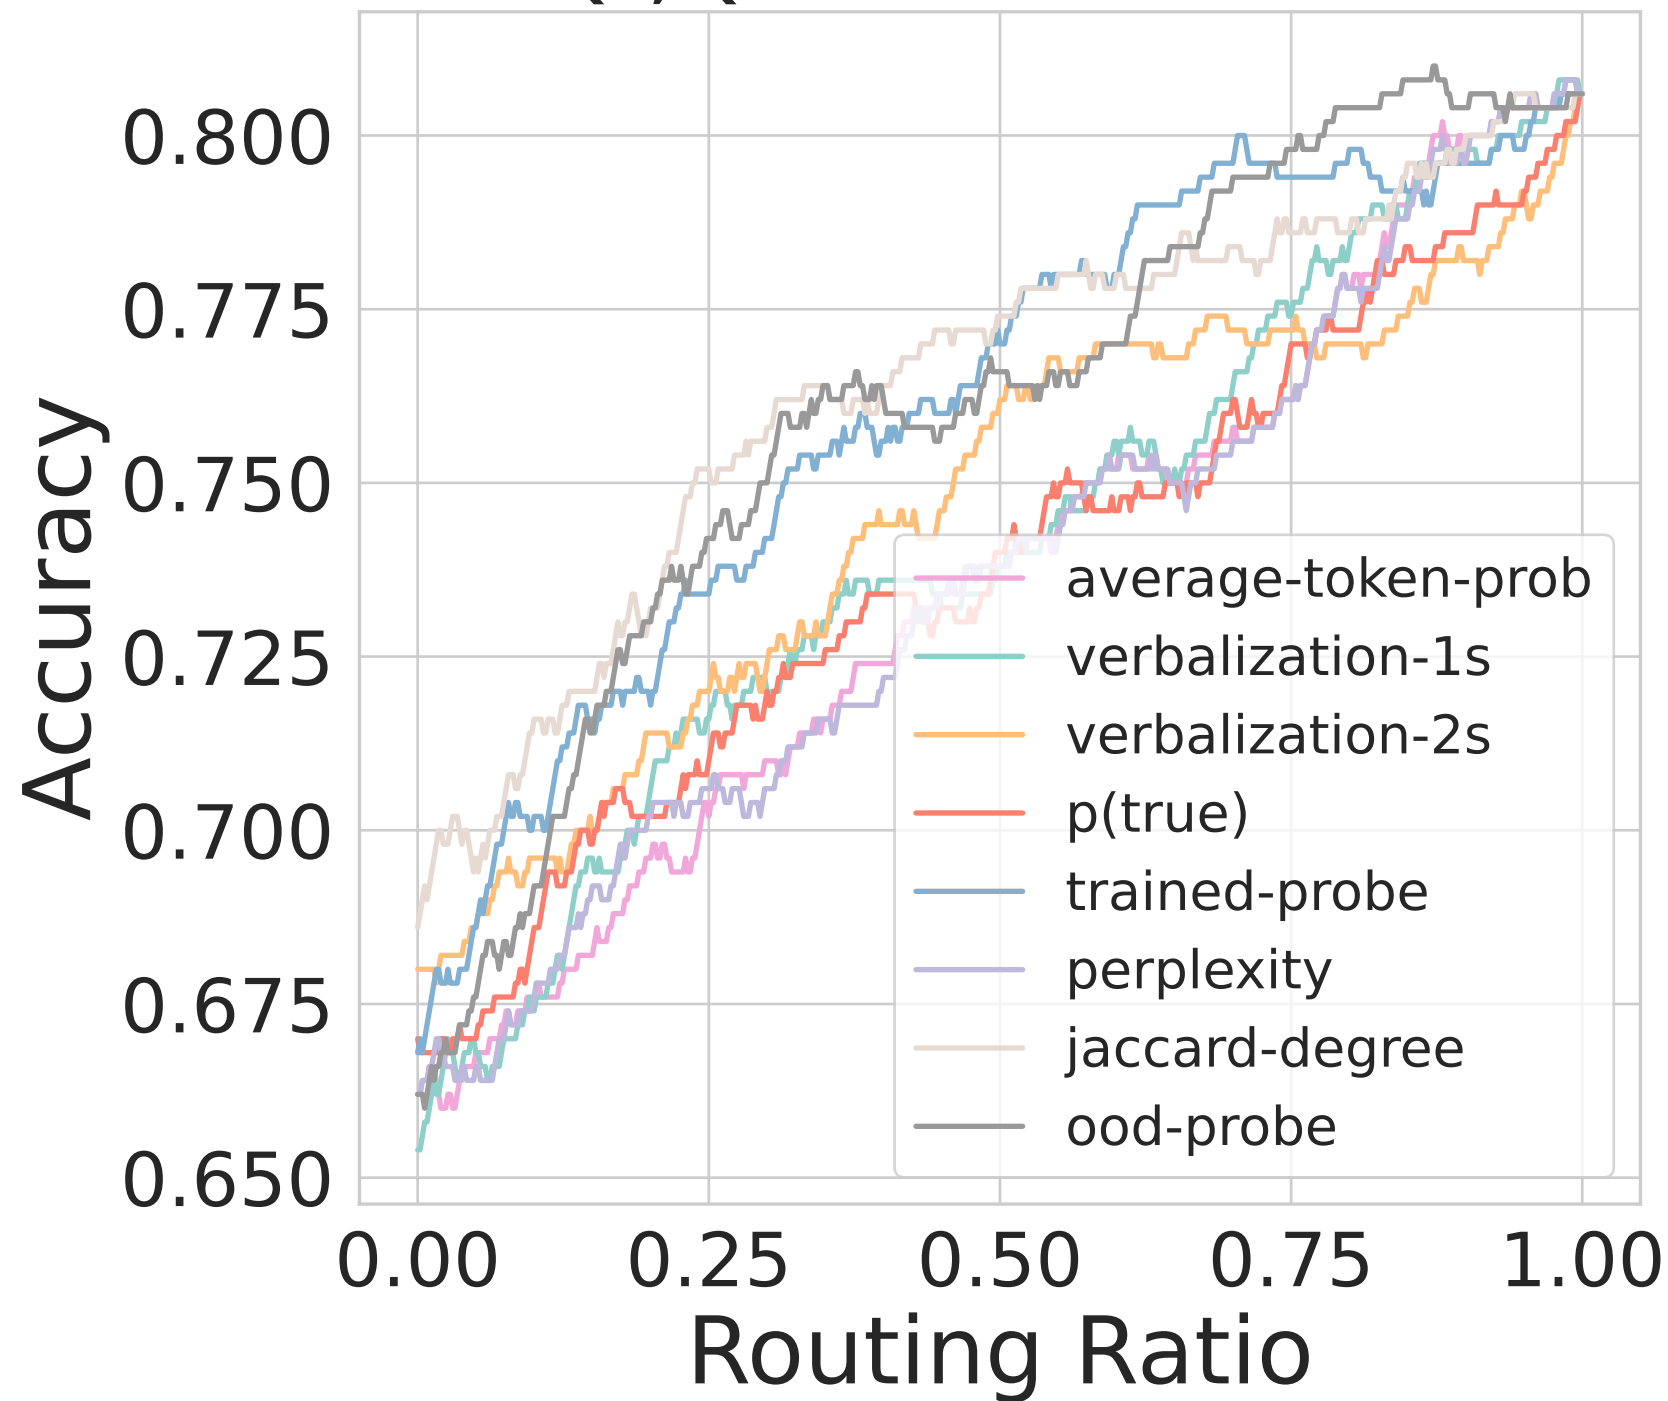

Supplement: supplementary_material [file rr_acc_social_i_qa_Qwen3-1.7B_llama70.pdf › Routing_SLM_LLMs/Uncertainty-based Routing/w_legend/to_llama70/rr_acc_social_i_qa_Qwen3-1.7B_llama70.pdf]

**Social IQa, Qwen3-4B to Llama-3.1-70B**

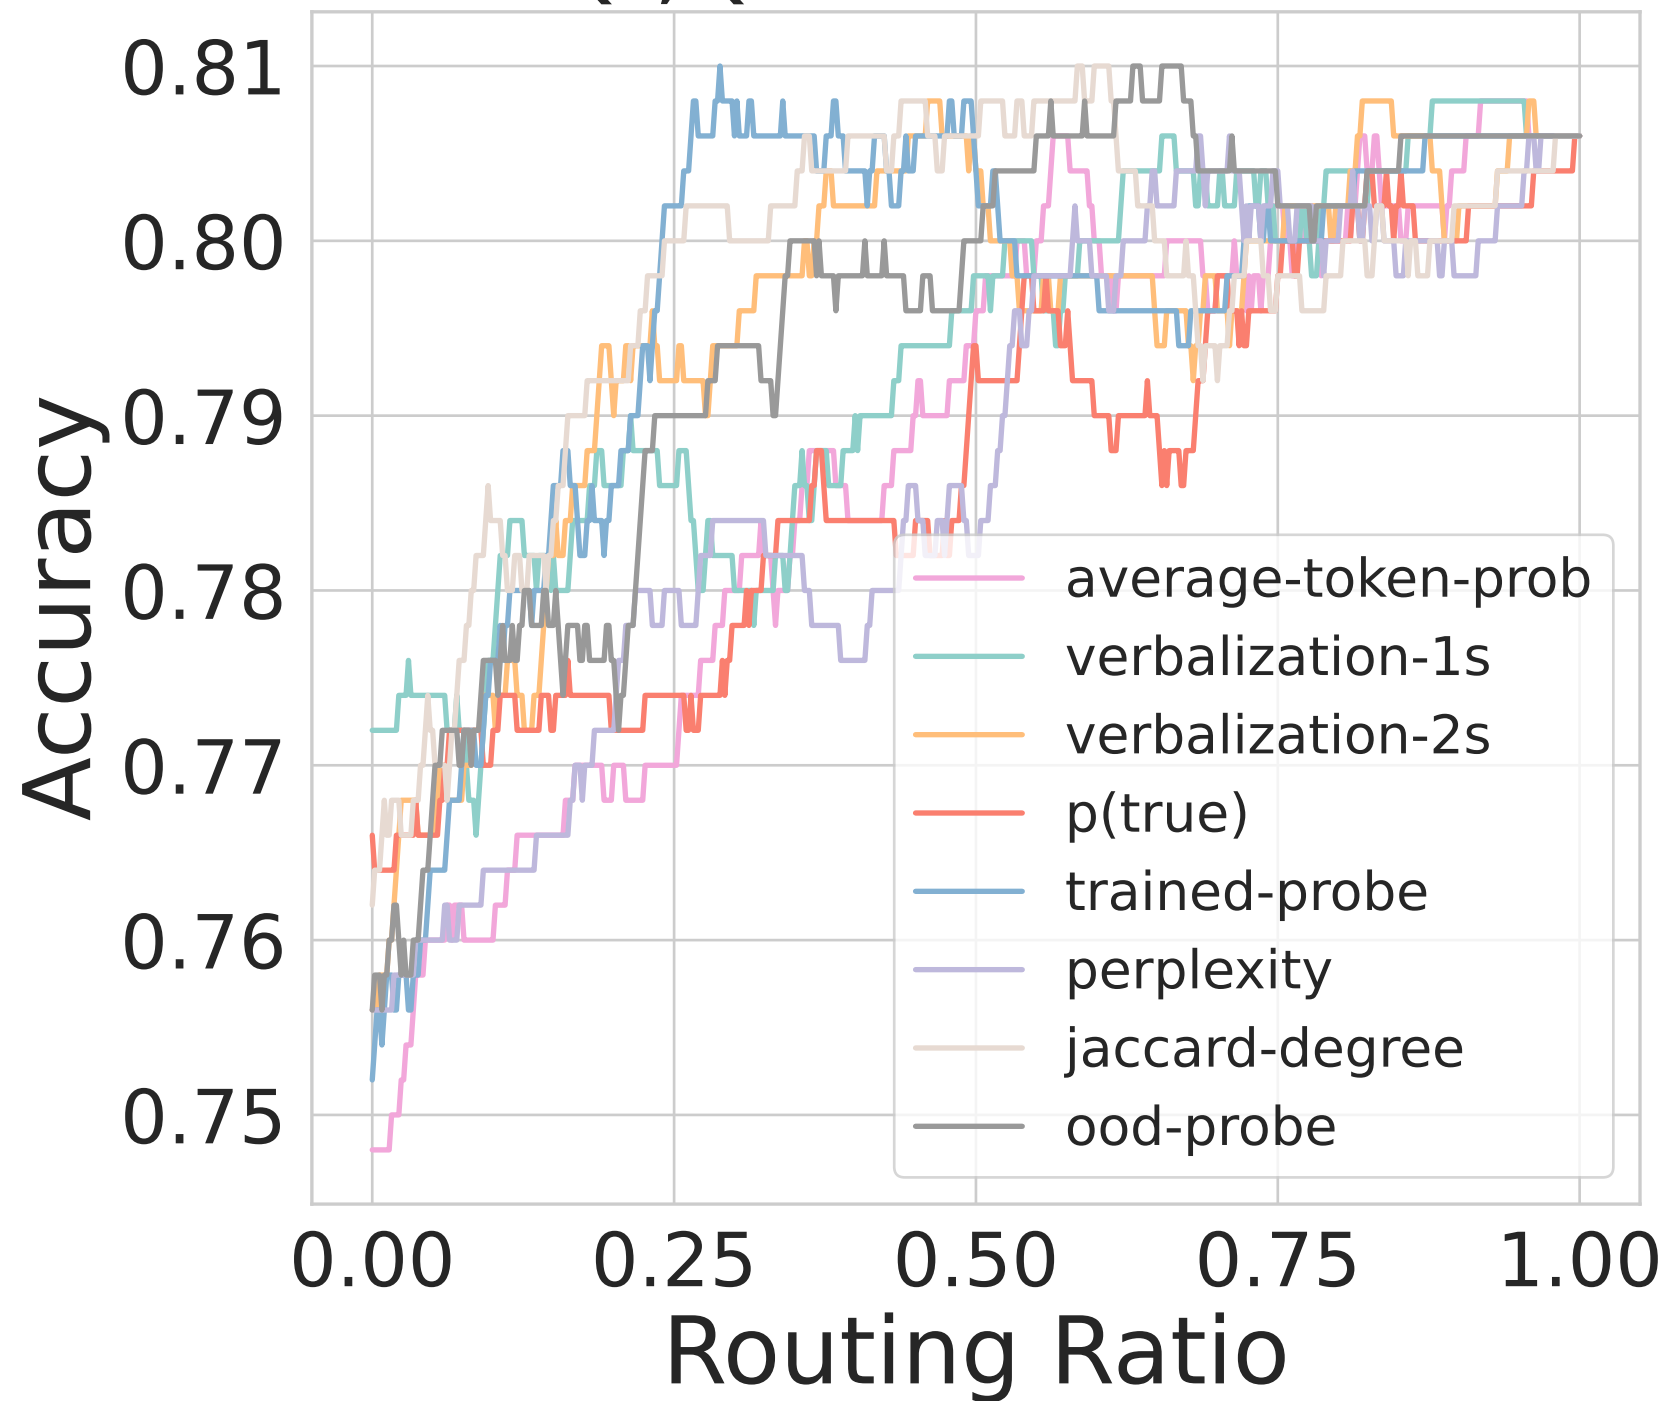

Supplement: supplementary_material [file rr_acc_social_i_qa_Qwen3-4B_llama70.pdf › Routing_SLM_LLMs/Uncertainty-based Routing/w_legend/to_llama70/rr_acc_social_i_qa_Qwen3-4B_llama70.pdf]

# Social IQa, granite-3.1-8b to Llama-3.1-70B

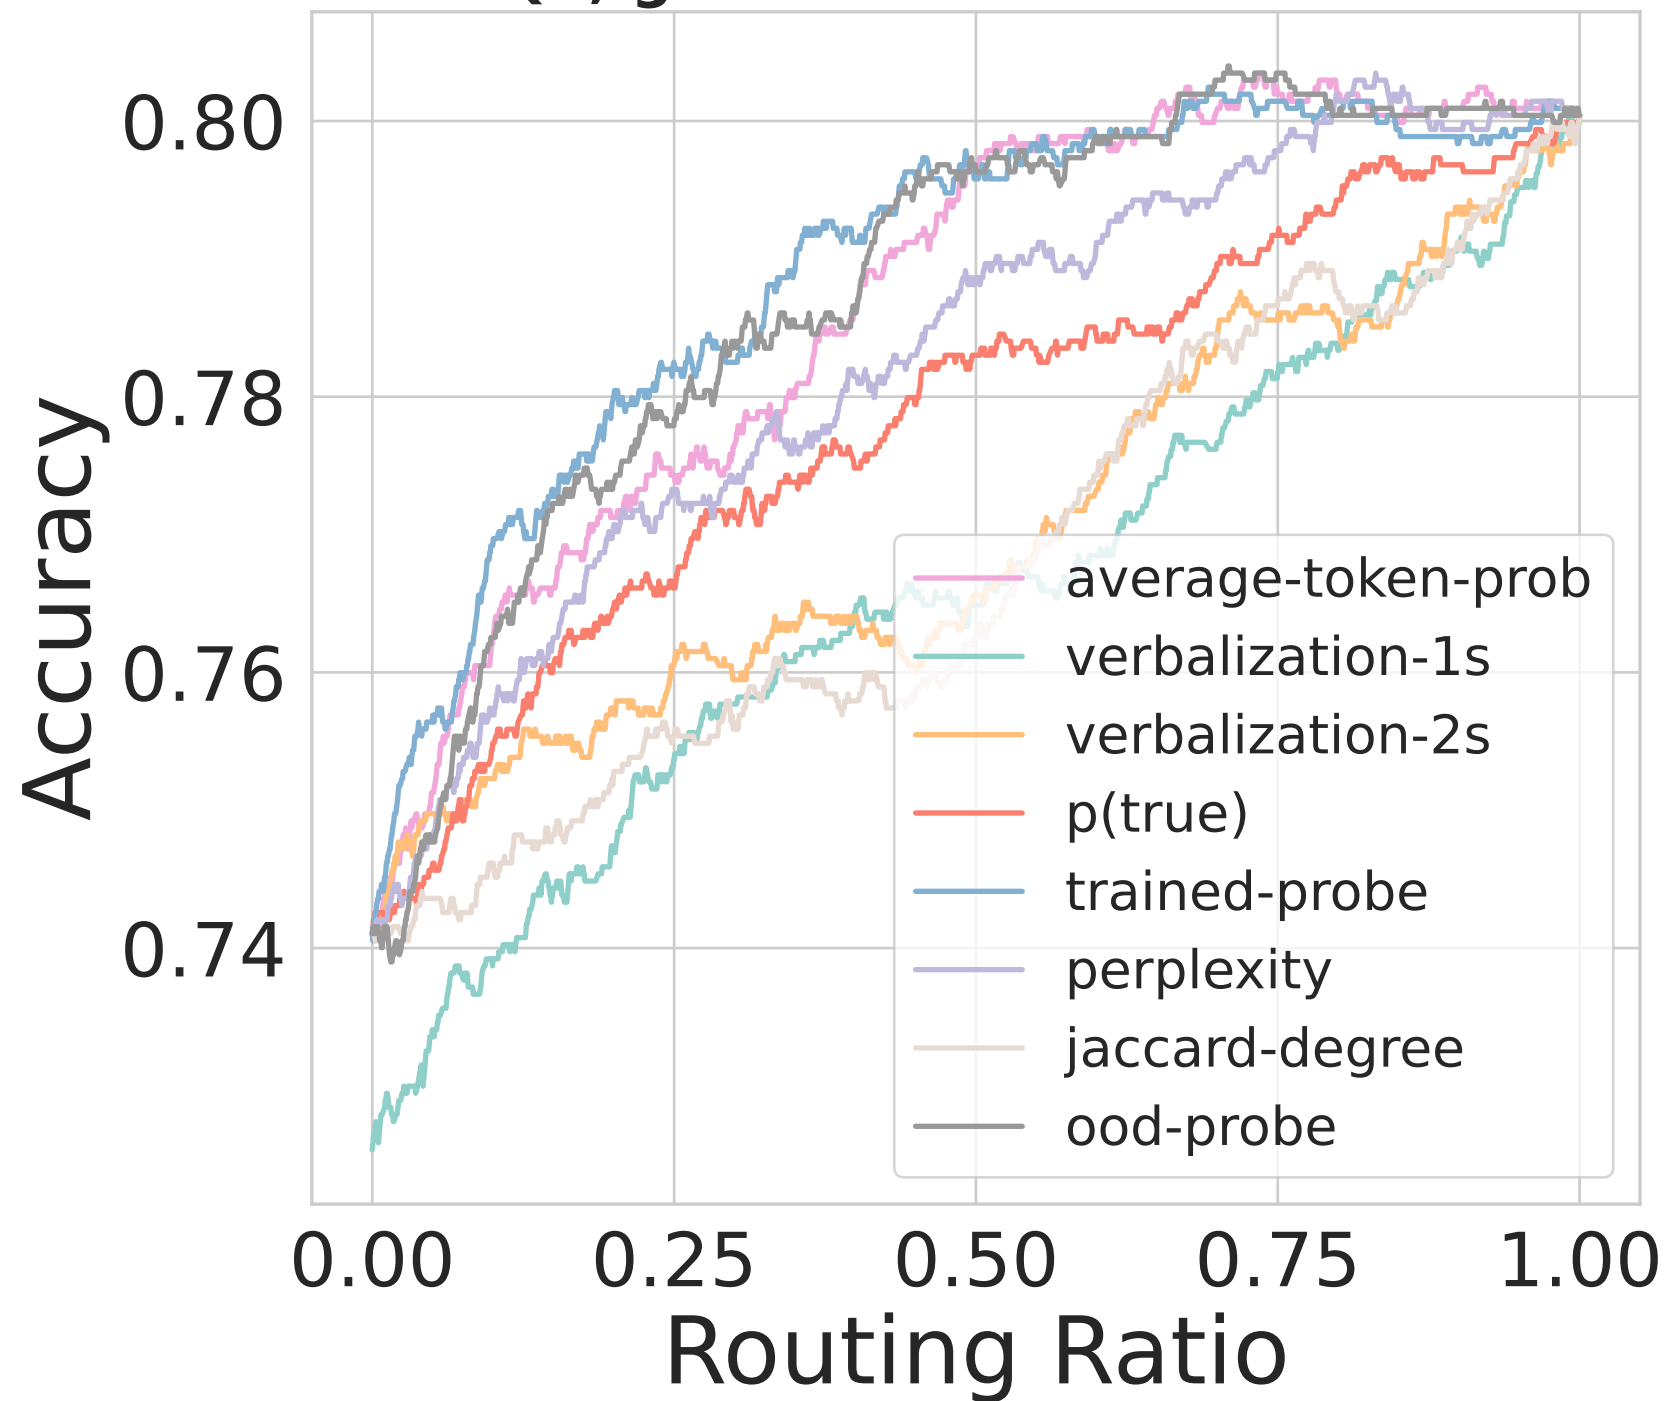

Supplement: supplementary_material [file rr_acc_social_i_qa_granite-3.1-8b_llama70.pdf › Routing_SLM_LLMs/Uncertainty-based Routing/w_legend/to_llama70/rr_acc_social_i_qa_granite-3.1-8b_llama70.pdf]

## Social IQa, llama-3.1-8b to Llama-3.1-70B

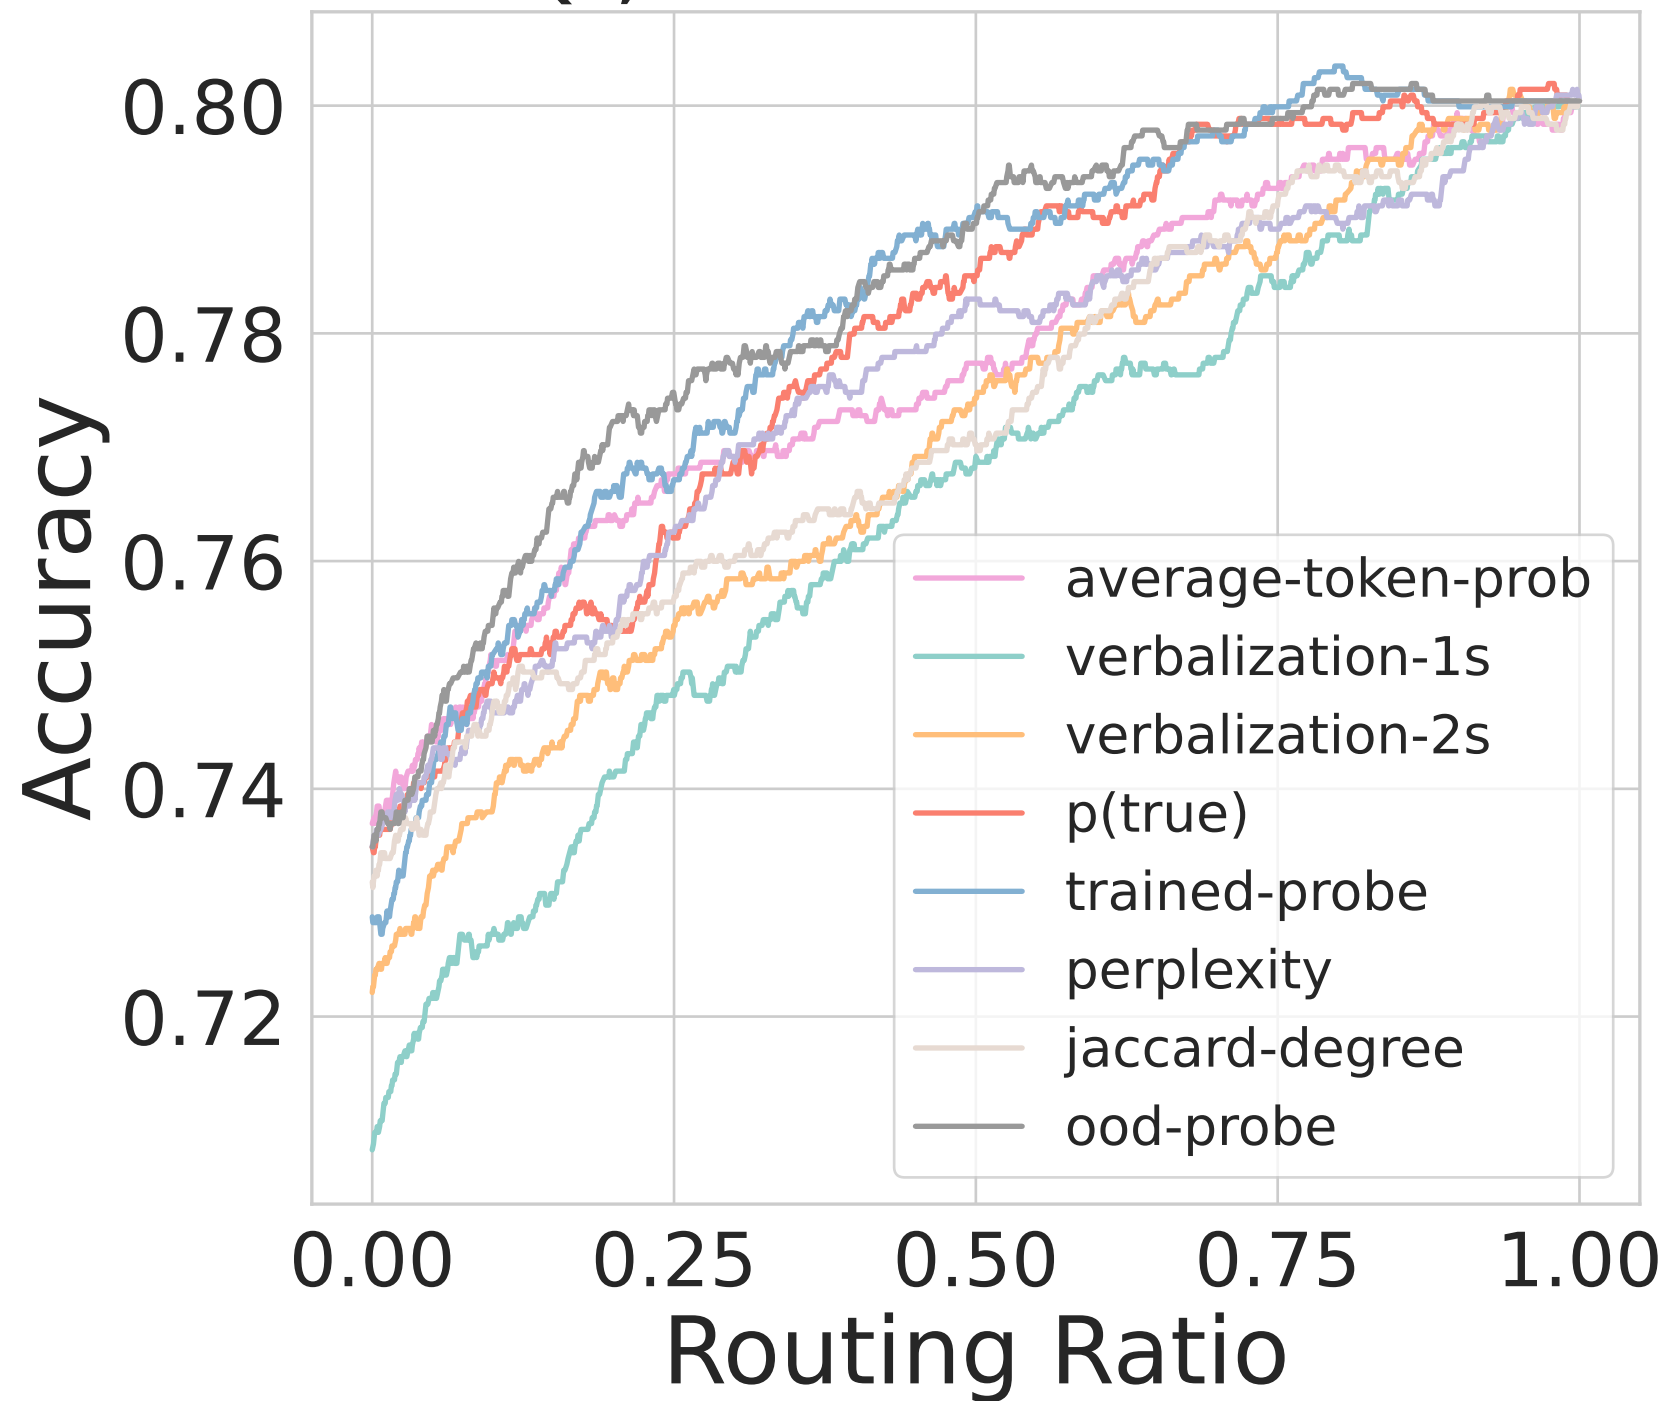

Supplement: supplementary_material [file rr_acc_social_i_qa_llama-3.1-8b_llama70.pdf › Routing_SLM_LLMs/Uncertainty-based Routing/w_legend/to_llama70/rr_acc_social_i_qa_llama-3.1-8b_llama70.pdf]

**Social IQa, llama-3.2-1b to Llama-3.1-70B**

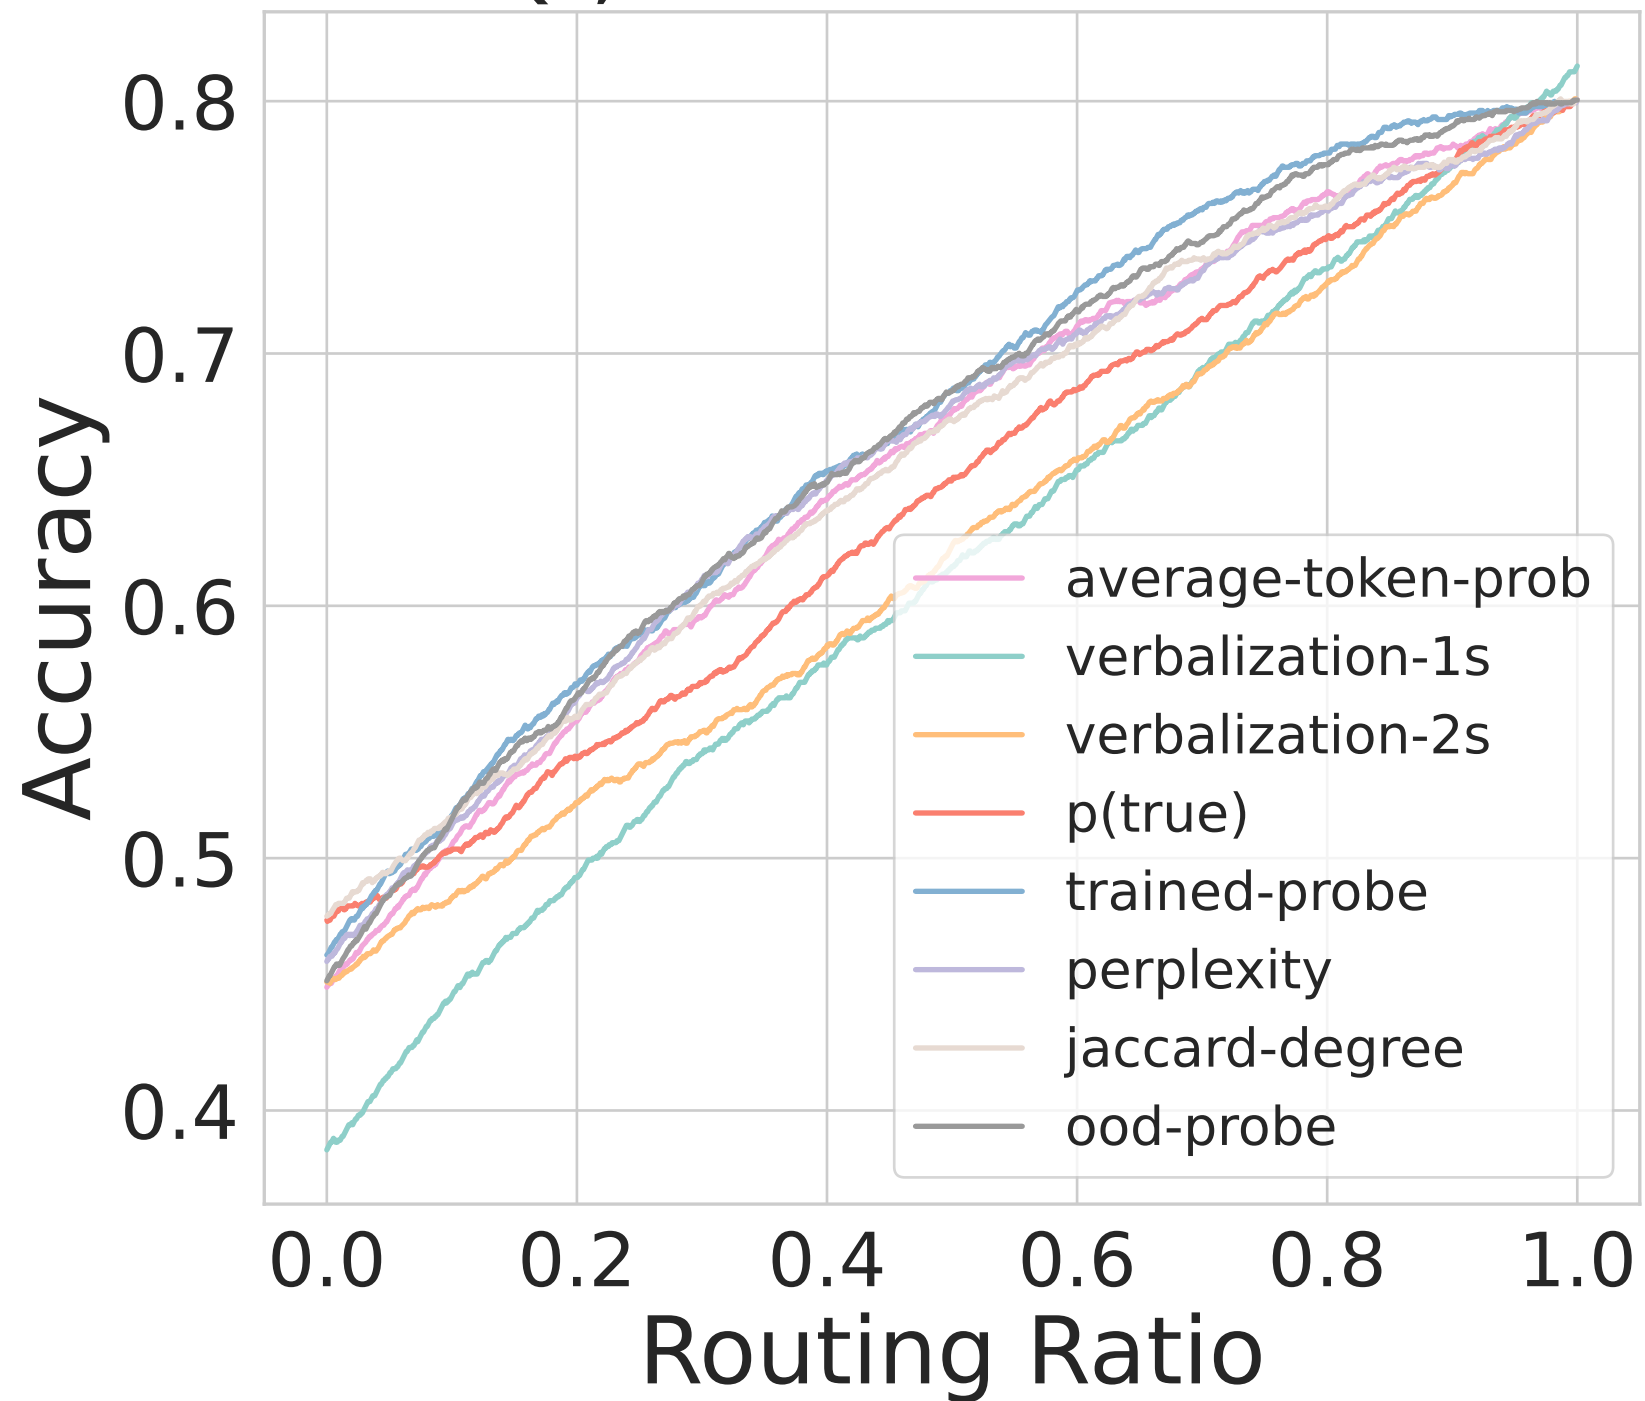

Supplement: supplementary_material [file rr_acc_social_i_qa_llama-3.2-1b_llama70.pdf › Routing_SLM_LLMs/Uncertainty-based Routing/w_legend/to_llama70/rr_acc_social_i_qa_llama-3.2-1b_llama70.pdf]

## Social IQa, llama-3.2-3b to Llama-3.1-70B

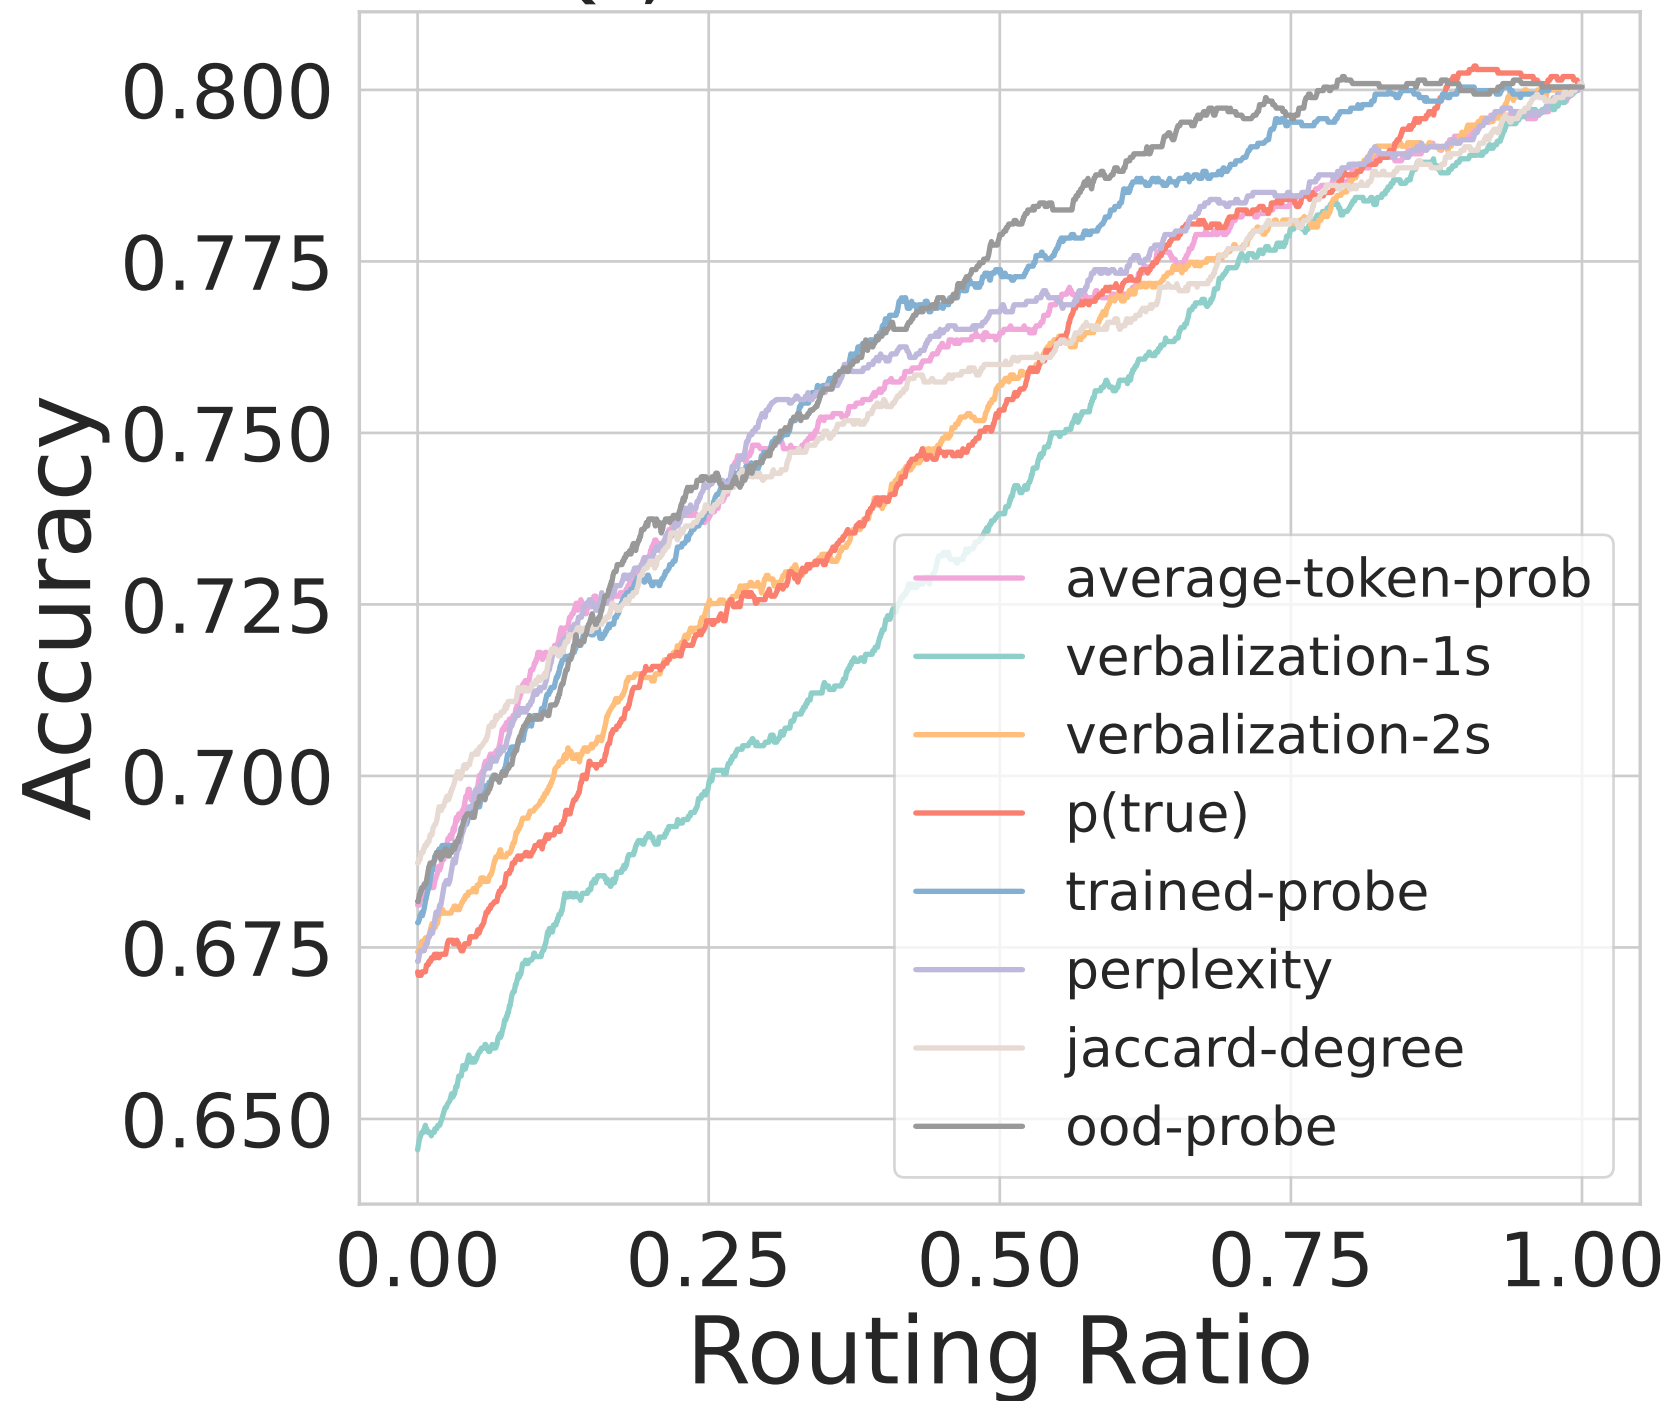

Supplement: supplementary_material [file rr_acc_social_i_qa_llama-3.2-3b_llama70.pdf › Routing_SLM_LLMs/Uncertainty-based Routing/w_legend/to_llama70/rr_acc_social_i_qa_llama-3.2-3b_llama70.pdf]

# Social IQa, mistral-7b to Llama-3.1-70B

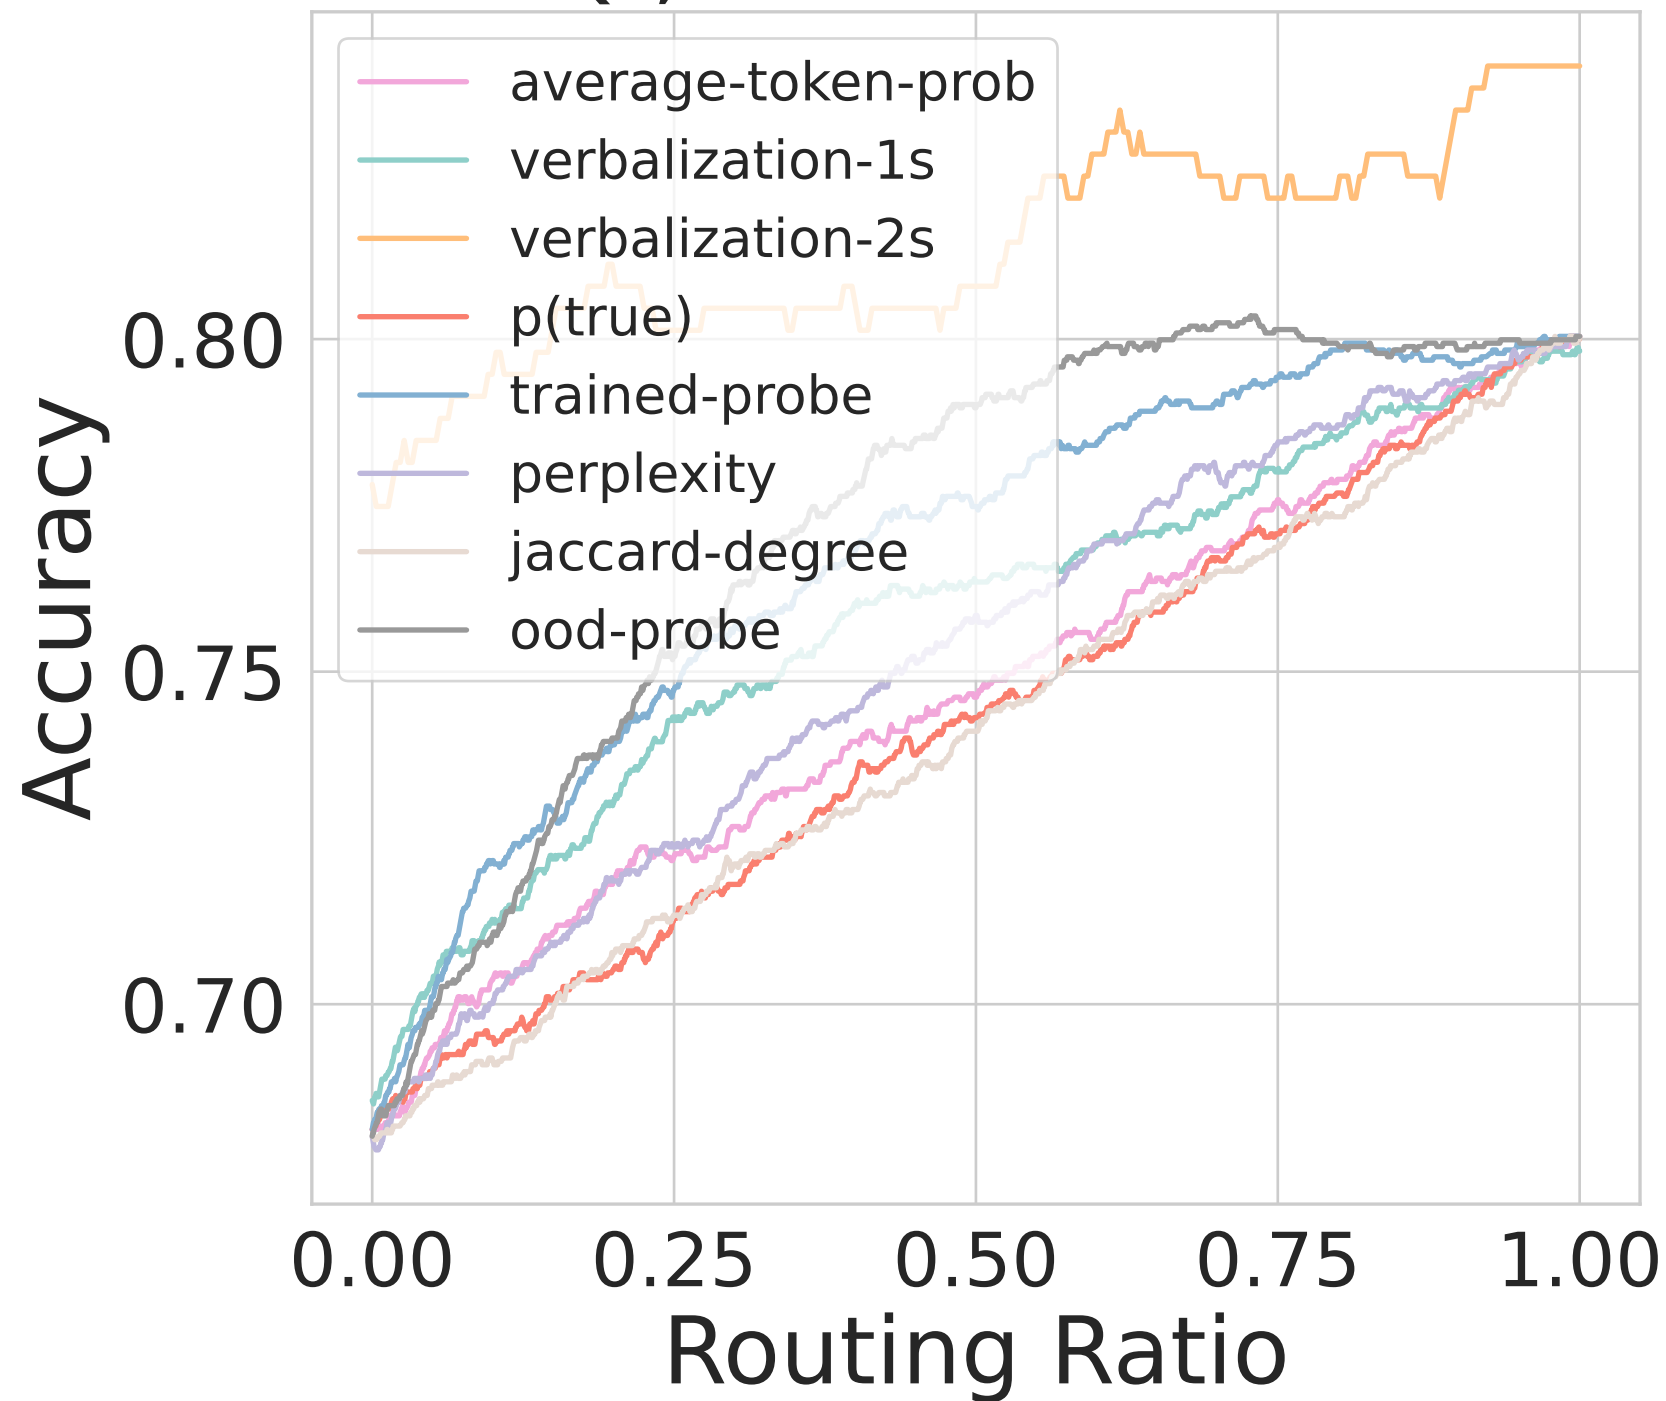

Supplement: supplementary_material [file rr_acc_social_i_qa_mistral-7b_llama70.pdf › Routing_SLM_LLMs/Uncertainty-based Routing/w_legend/to_llama70/rr_acc_social_i_qa_mistral-7b_llama70.pdf]

**Social IQa, phi-3.5-mini to Llama-3.1-70B**

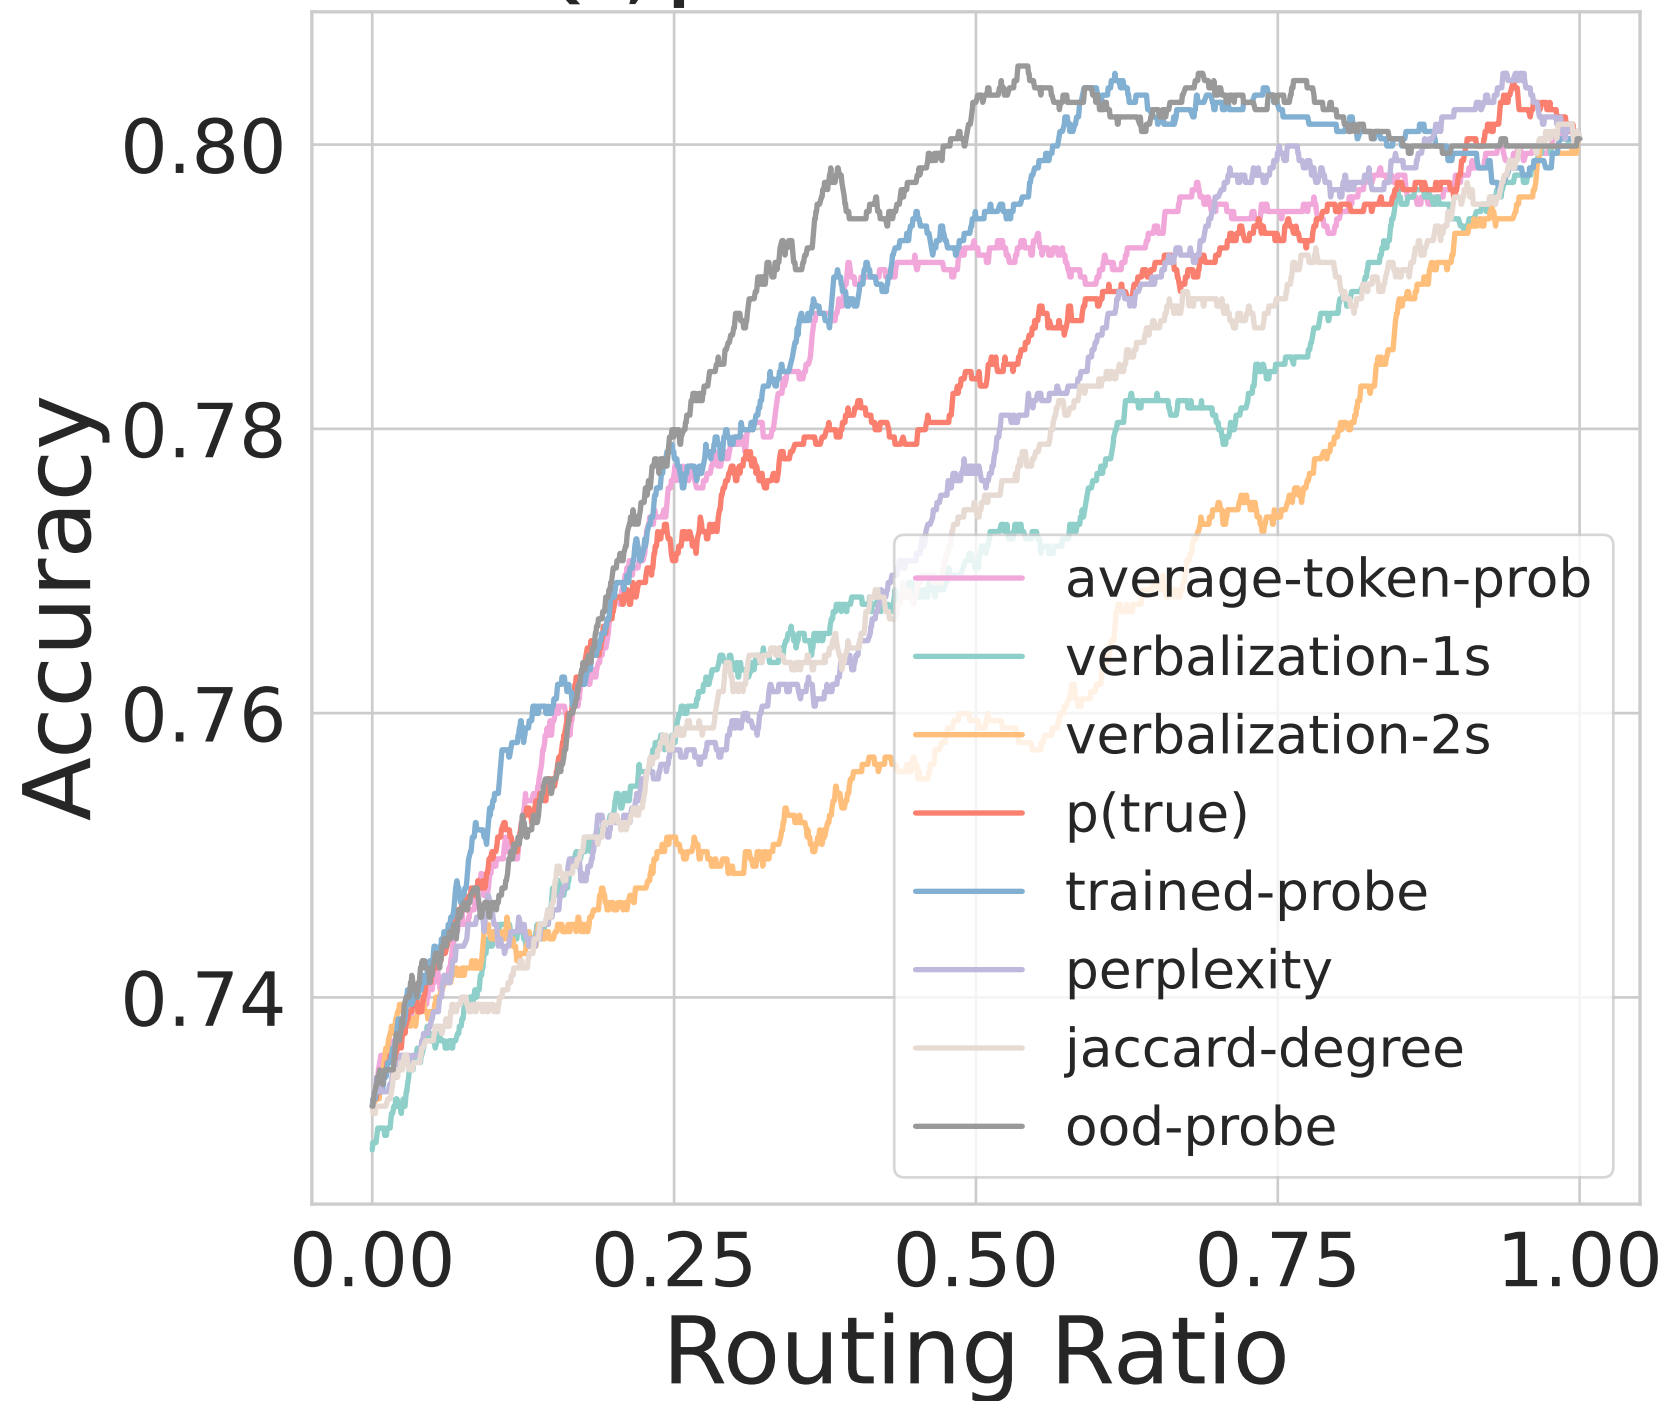

Supplement: supplementary_material [file rr_acc_social_i_qa_phi-3.5-mini_llama70.pdf › Routing_SLM_LLMs/Uncertainty-based Routing/w_legend/to_llama70/rr_acc_social_i_qa_phi-3.5-mini_llama70.pdf]

# Social IQa, phi-4-mini-reasoning to Llama-3.1-70B

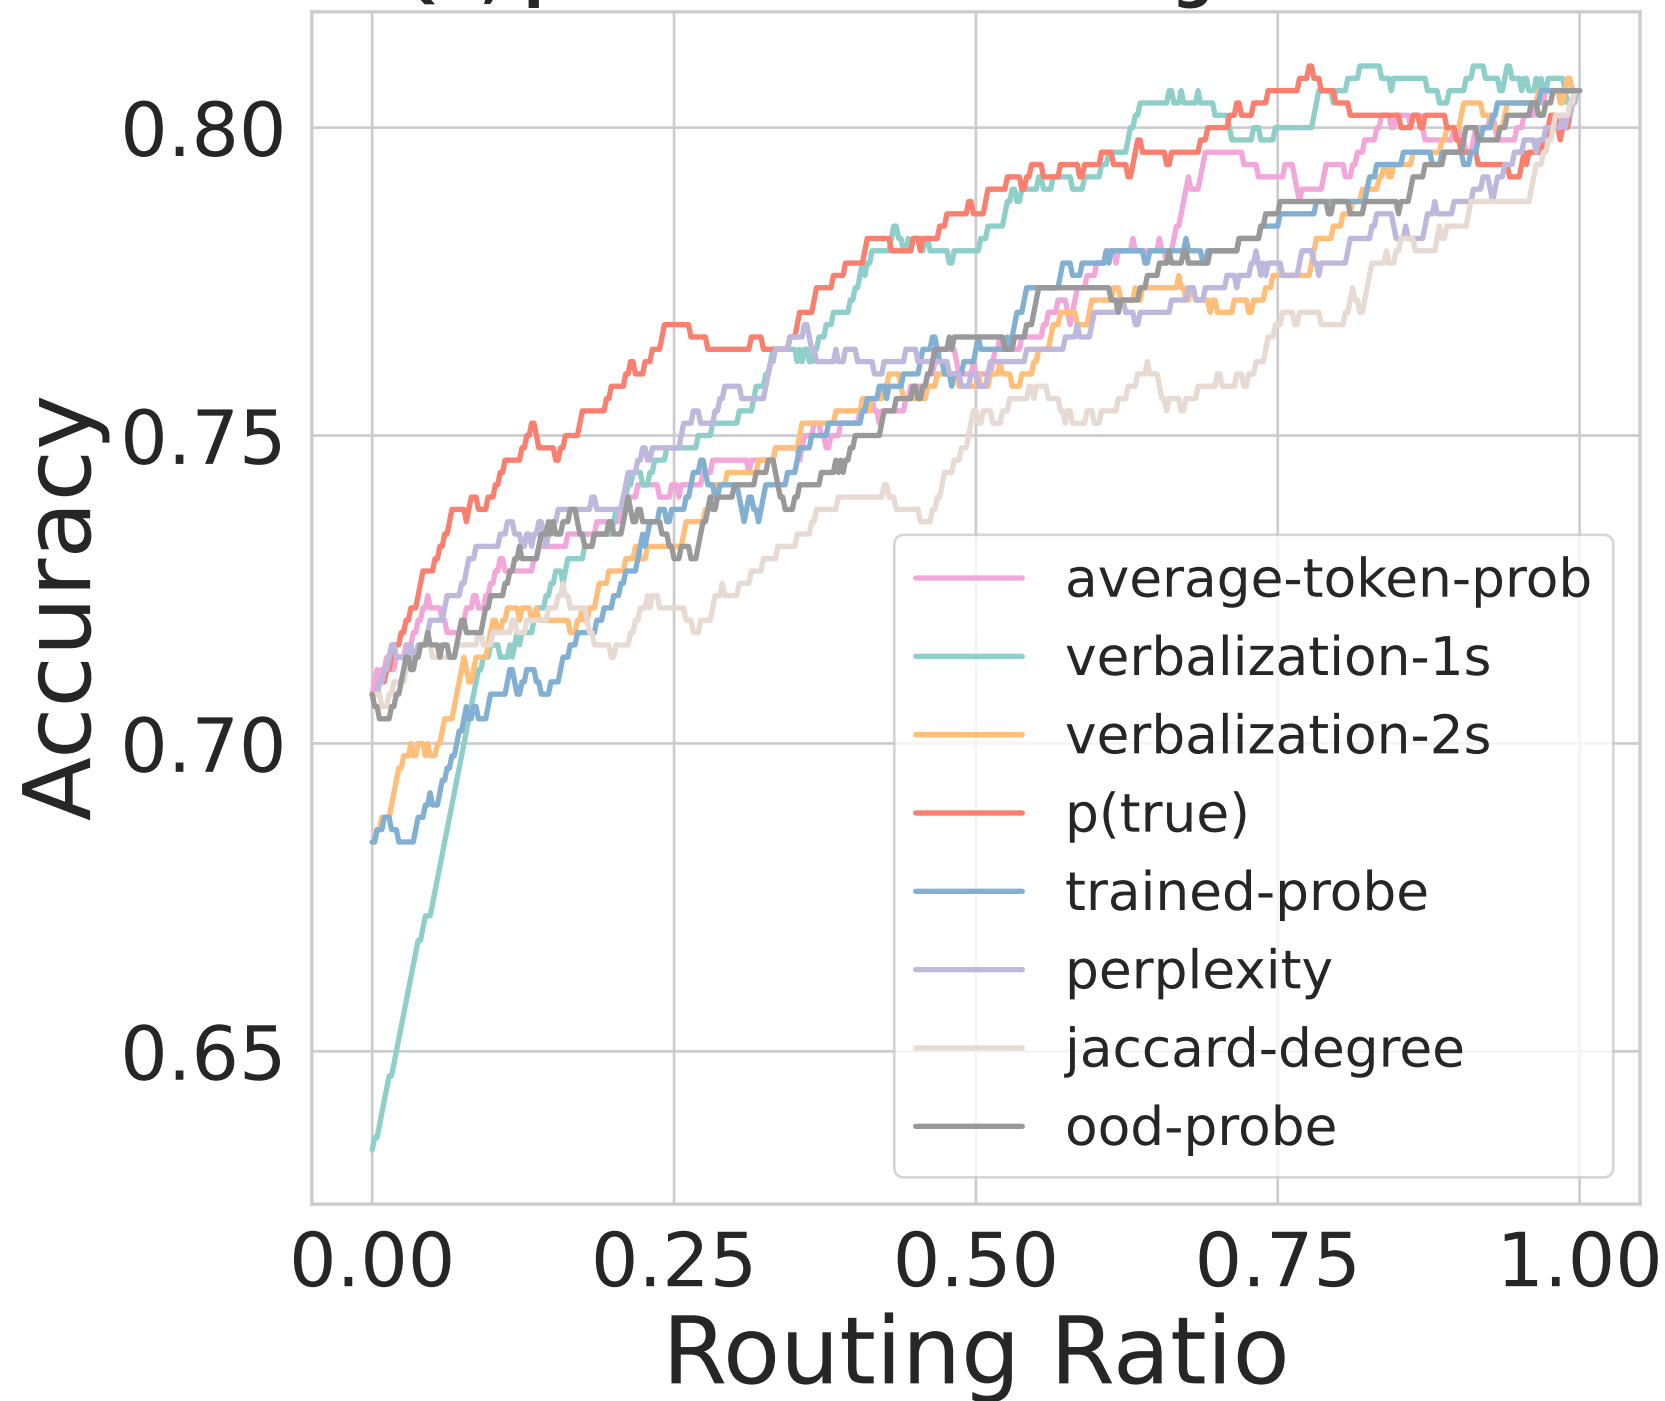

Supplement: supplementary_material [file rr_acc_social_i_qa_phi-4-mini-reasoning_llama70.pdf › Routing_SLM_LLMs/Uncertainty-based Routing/w_legend/to_llama70/rr_acc_social_i_qa_phi-4-mini-reasoning_llama70.pdf]

## Social IQa, rwkv to Llama-3.1-70B

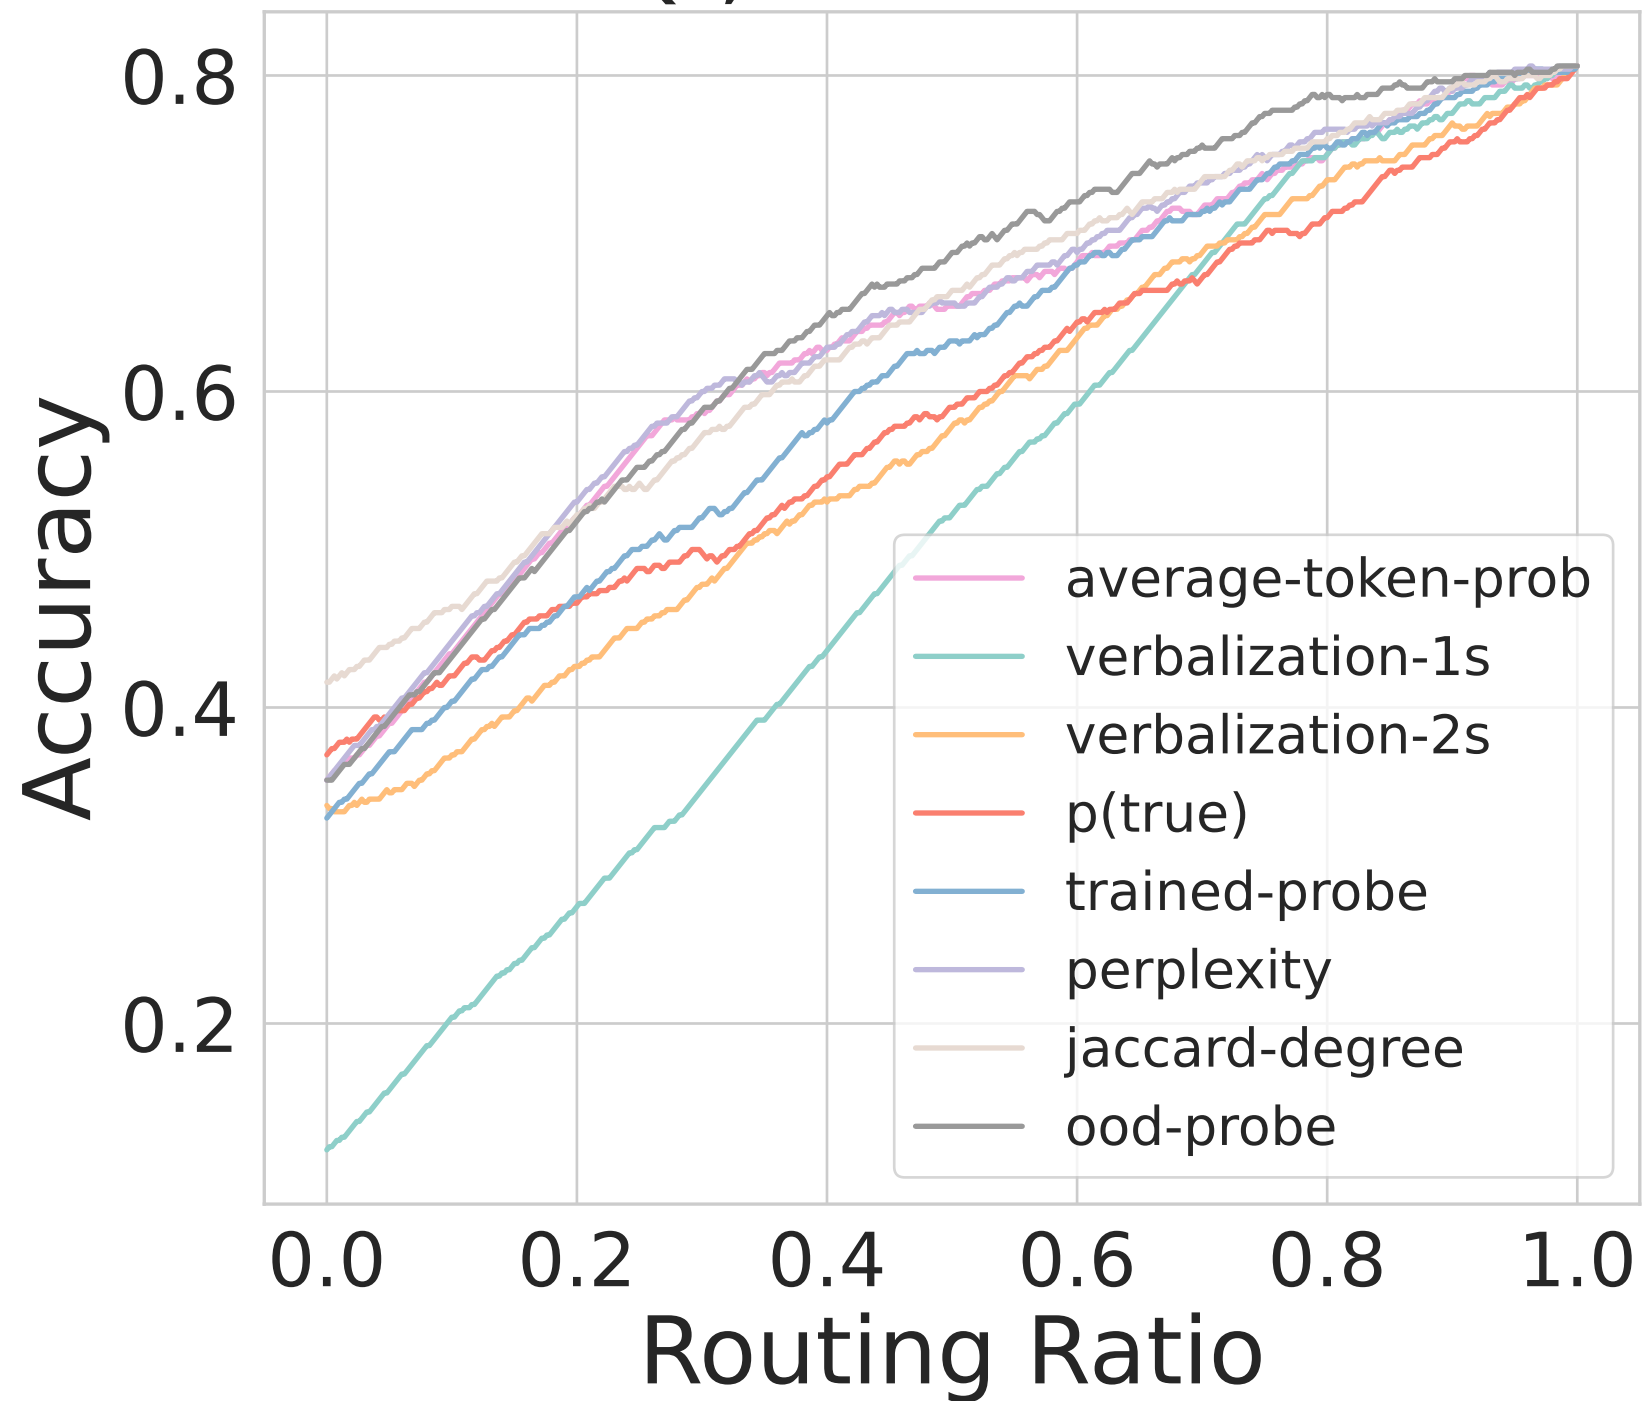

Supplement: supplementary_material [file rr_acc_social_i_qa_rwkv_llama70.pdf › Routing_SLM_LLMs/Uncertainty-based Routing/w_legend/to_llama70/rr_acc_social_i_qa_rwkv_llama70.pdf]

# SVAMP, Qwen3-0.6B to Llama-3.1-70B

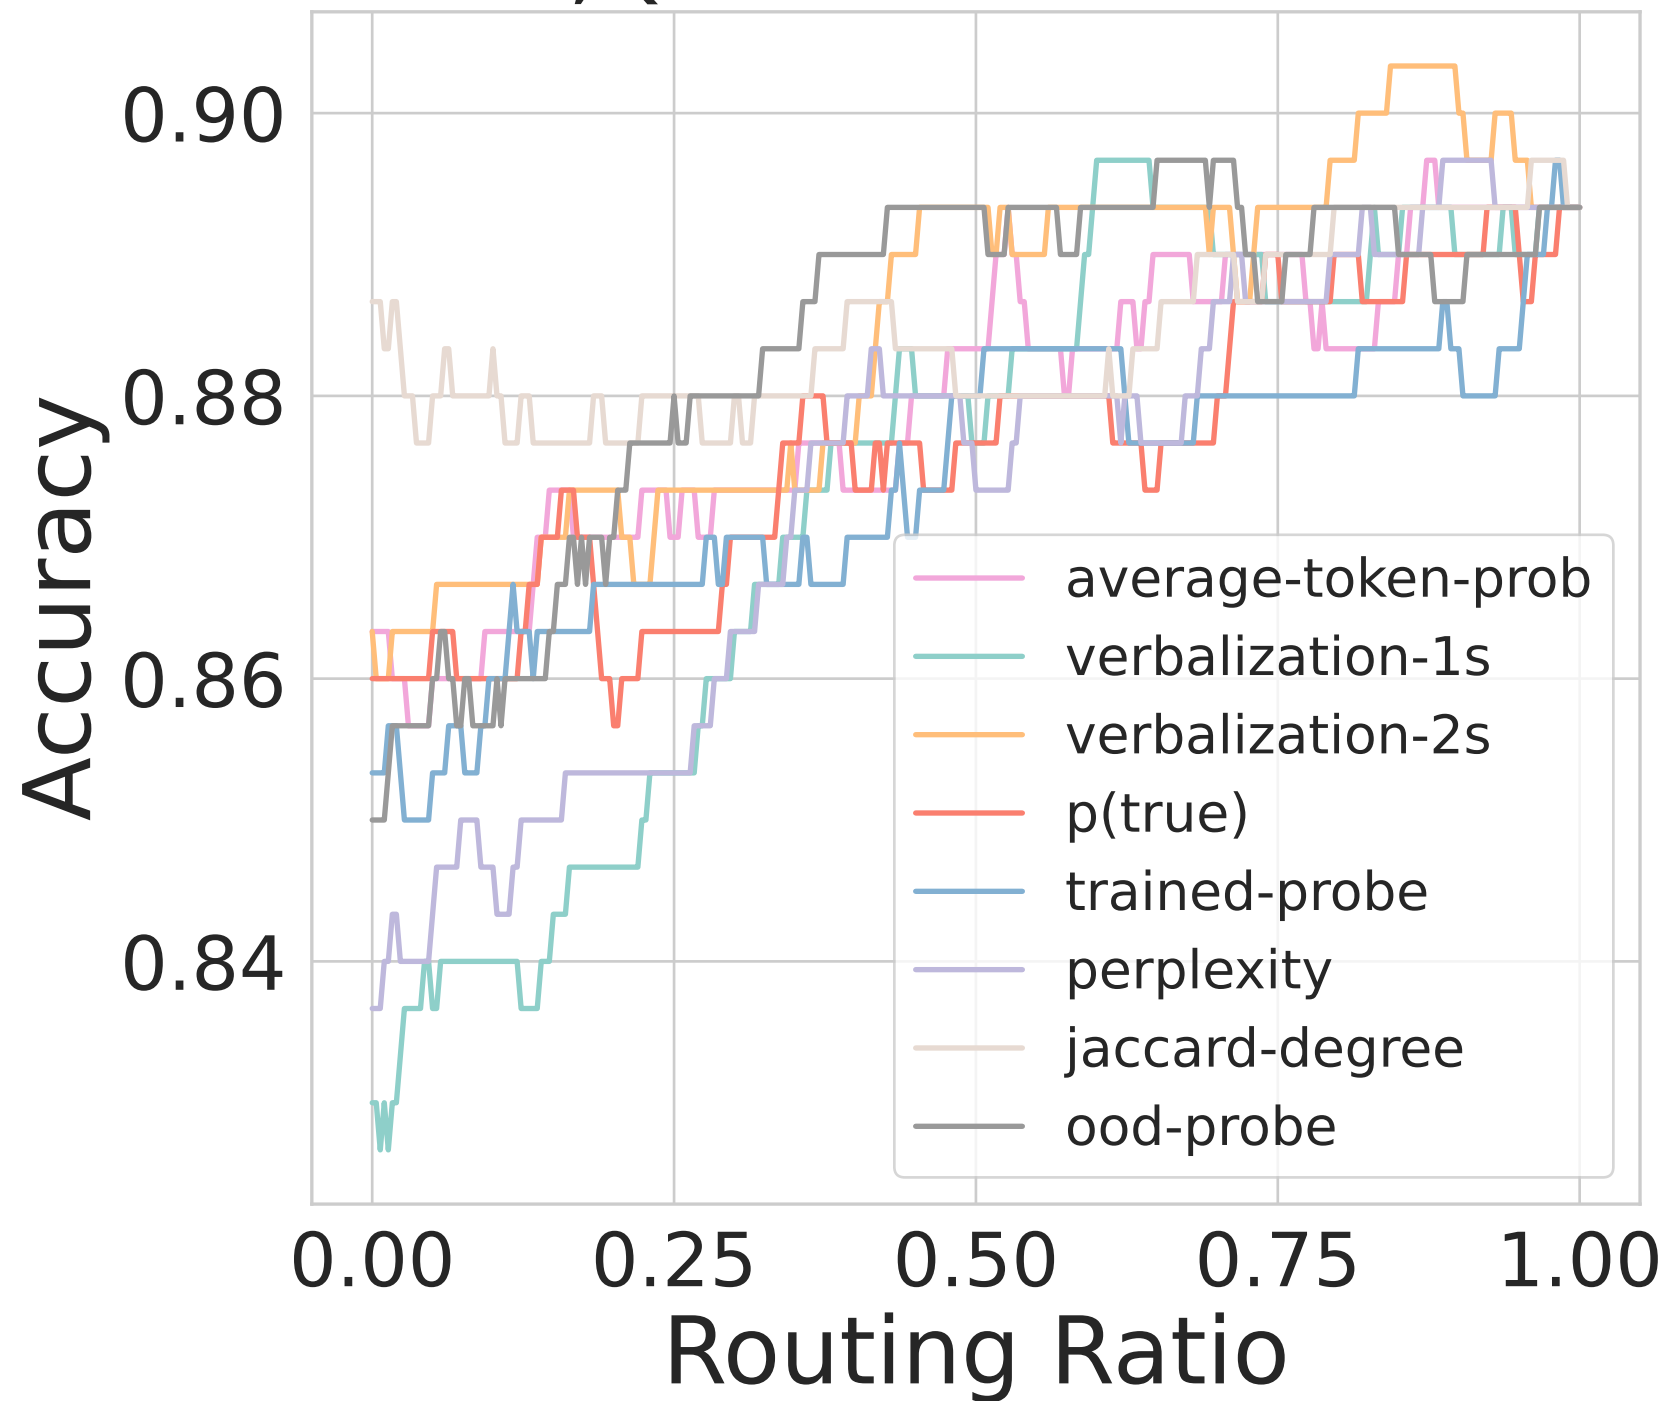

Supplement: supplementary_material [file rr_acc_svamp_Qwen3-0.6B_llama70.pdf › Routing_SLM_LLMs/Uncertainty-based Routing/w_legend/to_llama70/rr_acc_svamp_Qwen3-0.6B_llama70.pdf]

# SVAMP, Qwen3-4B to Llama-3.1-70B

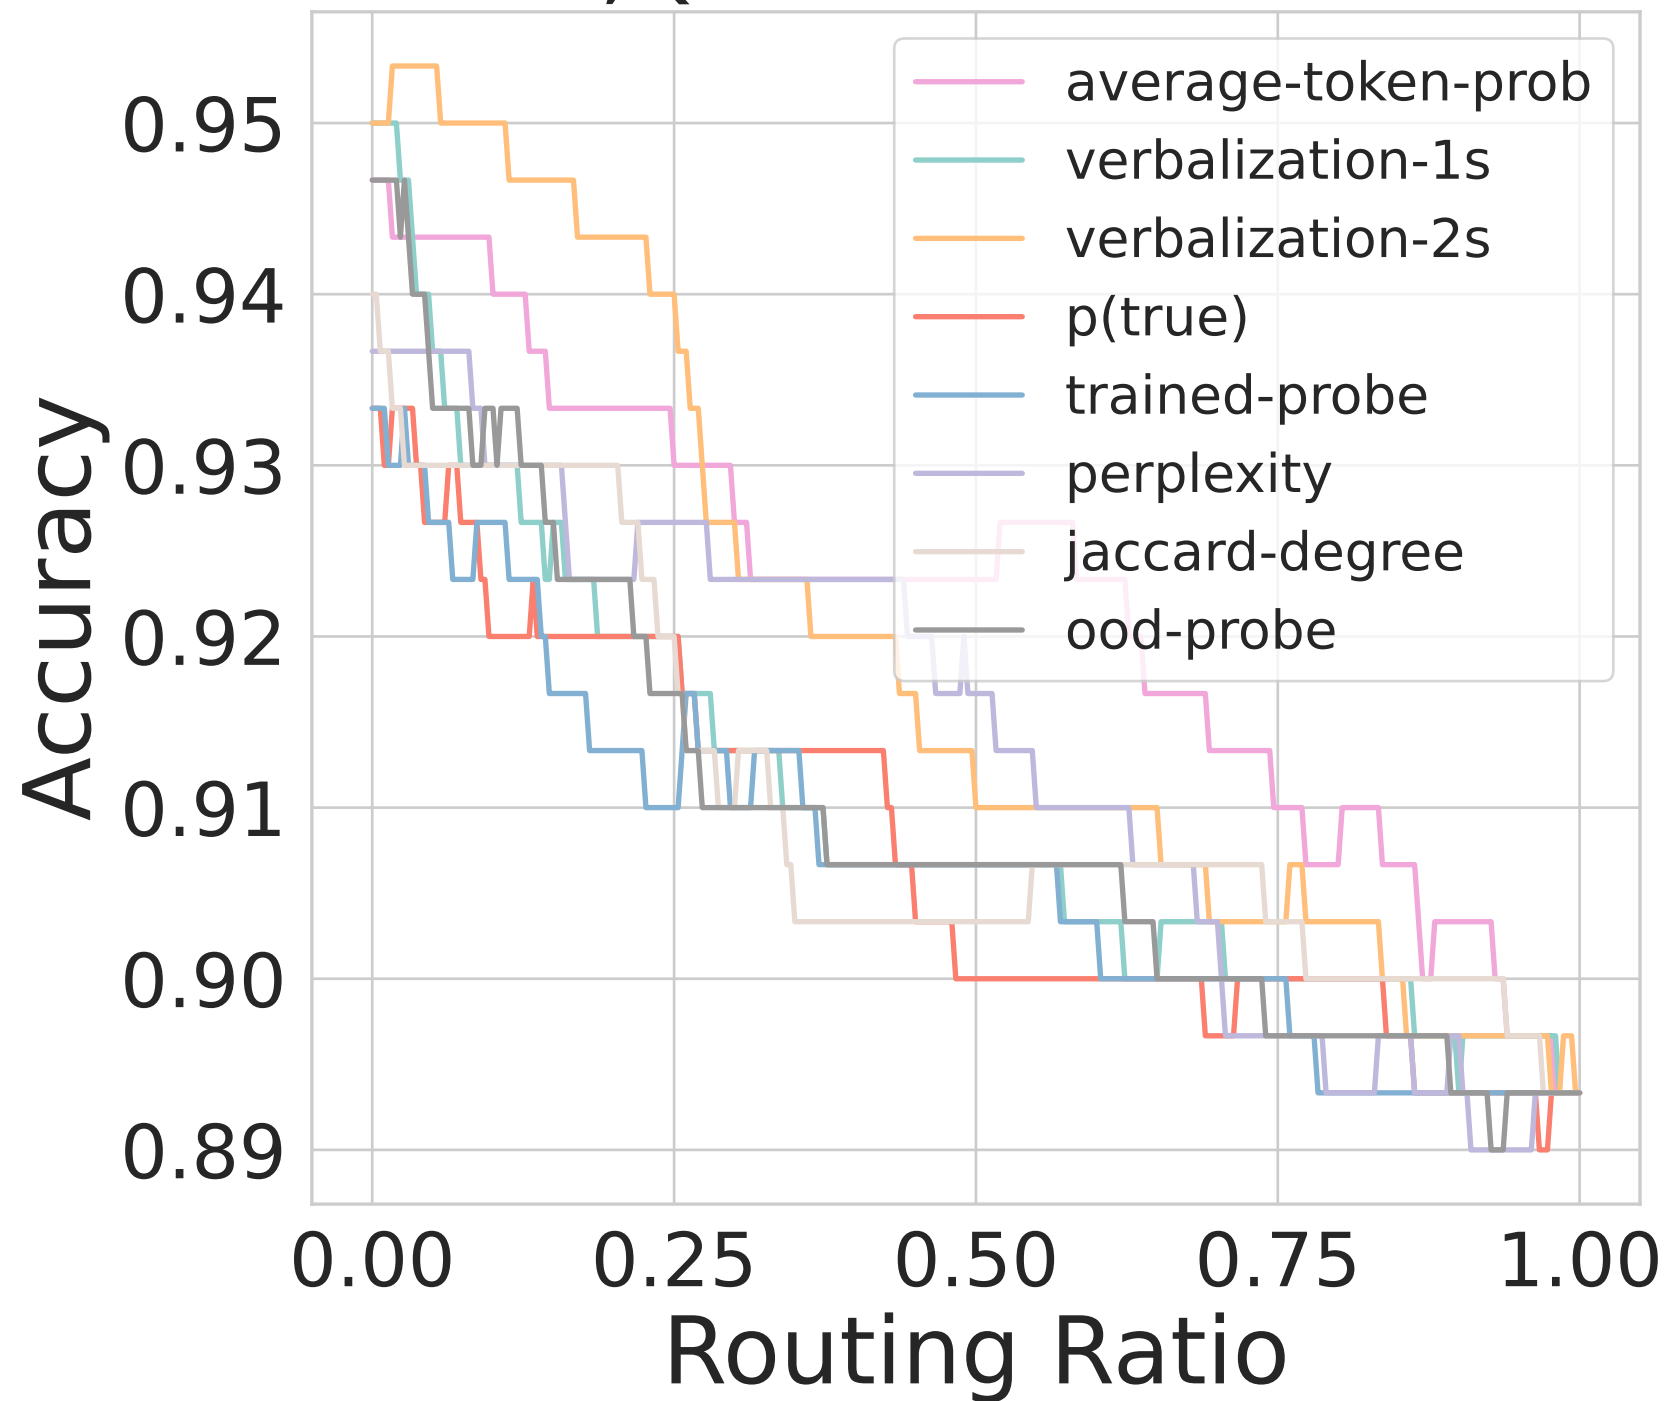

Supplement: supplementary_material [file rr_acc_svamp_Qwen3-4B_llama70.pdf › Routing_SLM_LLMs/Uncertainty-based Routing/w_legend/to_llama70/rr_acc_svamp_Qwen3-4B_llama70.pdf]

# SVAMP, granite-3.1-8b to Llama-3.1-70B

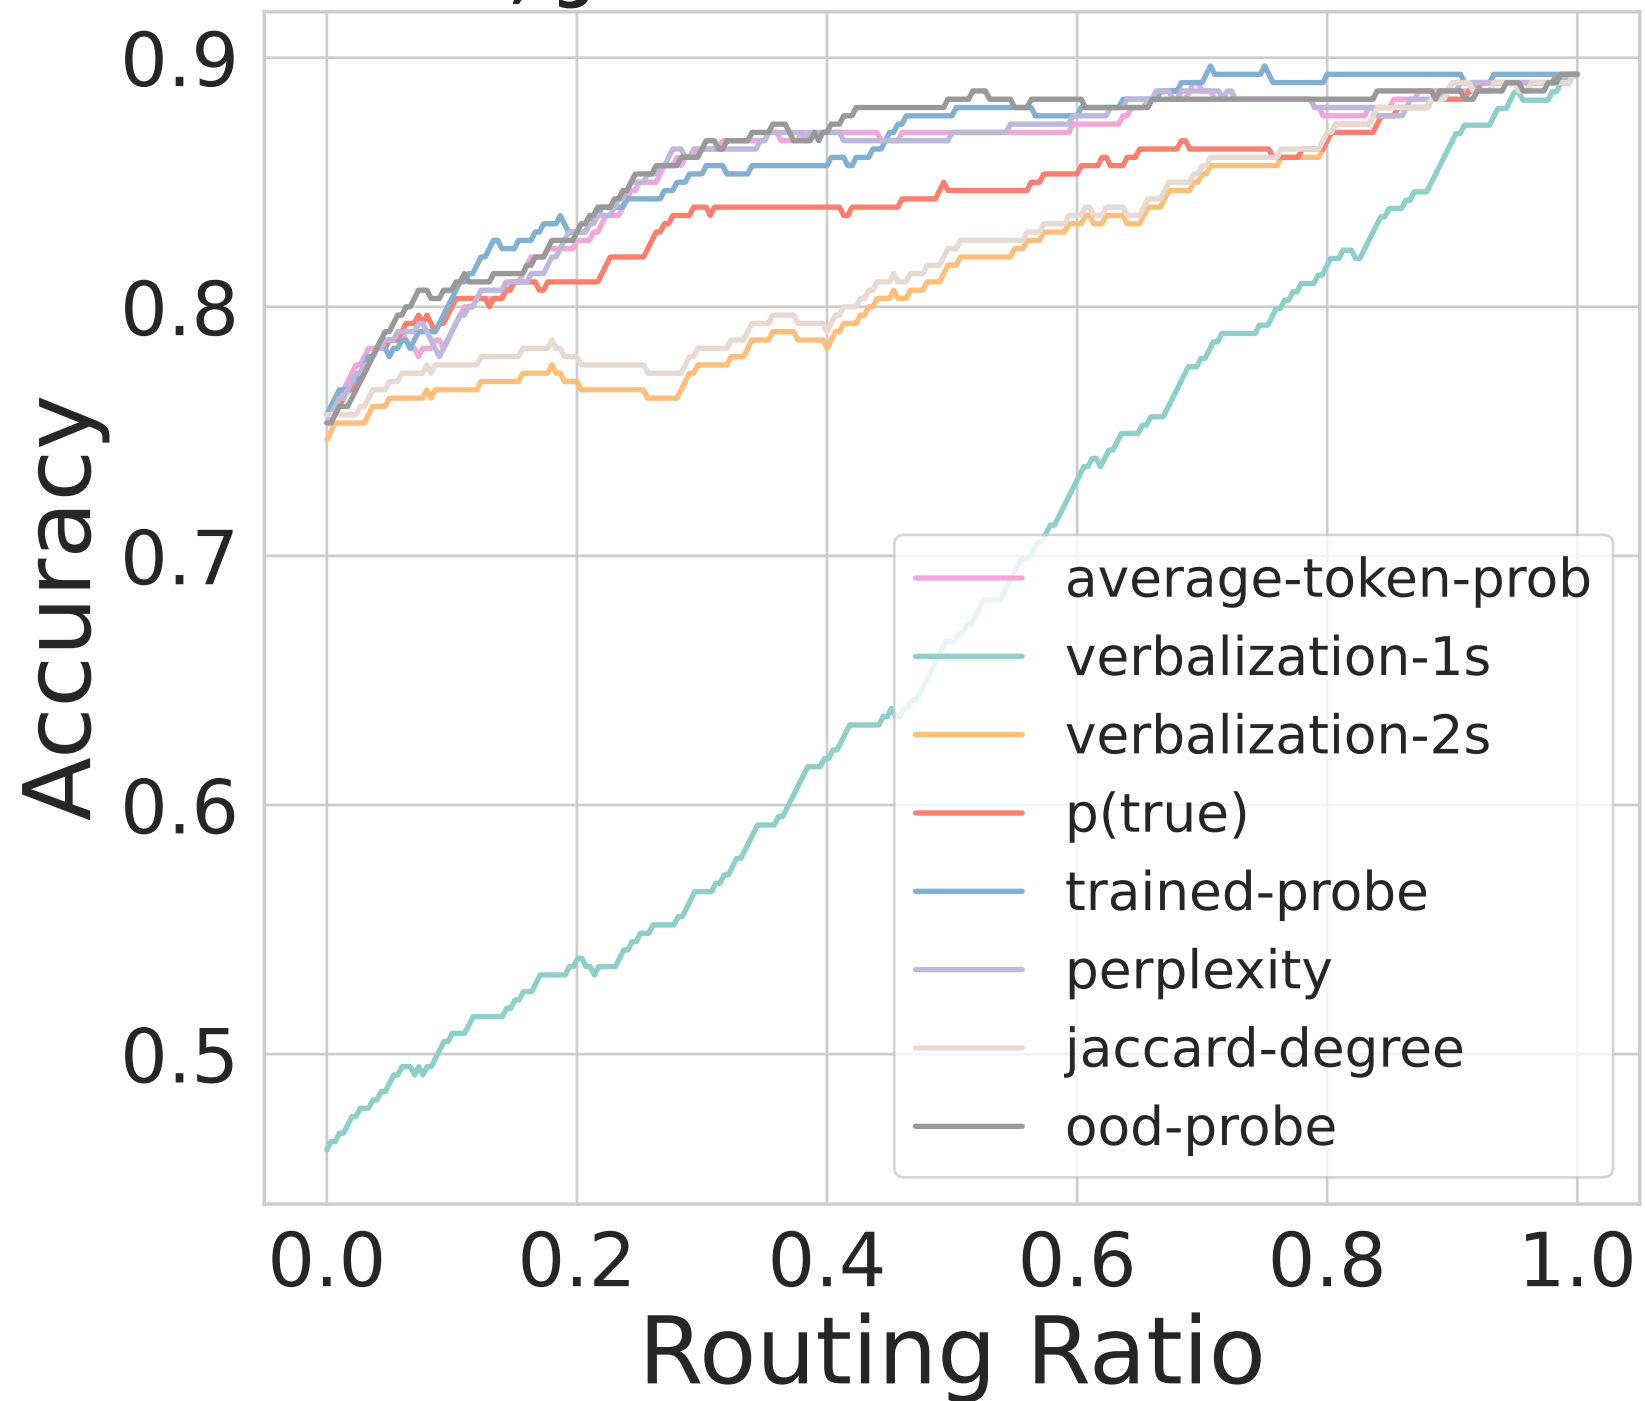

Supplement: supplementary_material [file rr_acc_svamp_granite-3.1-8b_llama70.pdf › Routing_SLM_LLMs/Uncertainty-based Routing/w_legend/to_llama70/rr_acc_svamp_granite-3.1-8b_llama70.pdf]

**SVAMP, llama-3.1-8b to Llama-3.1-70B**

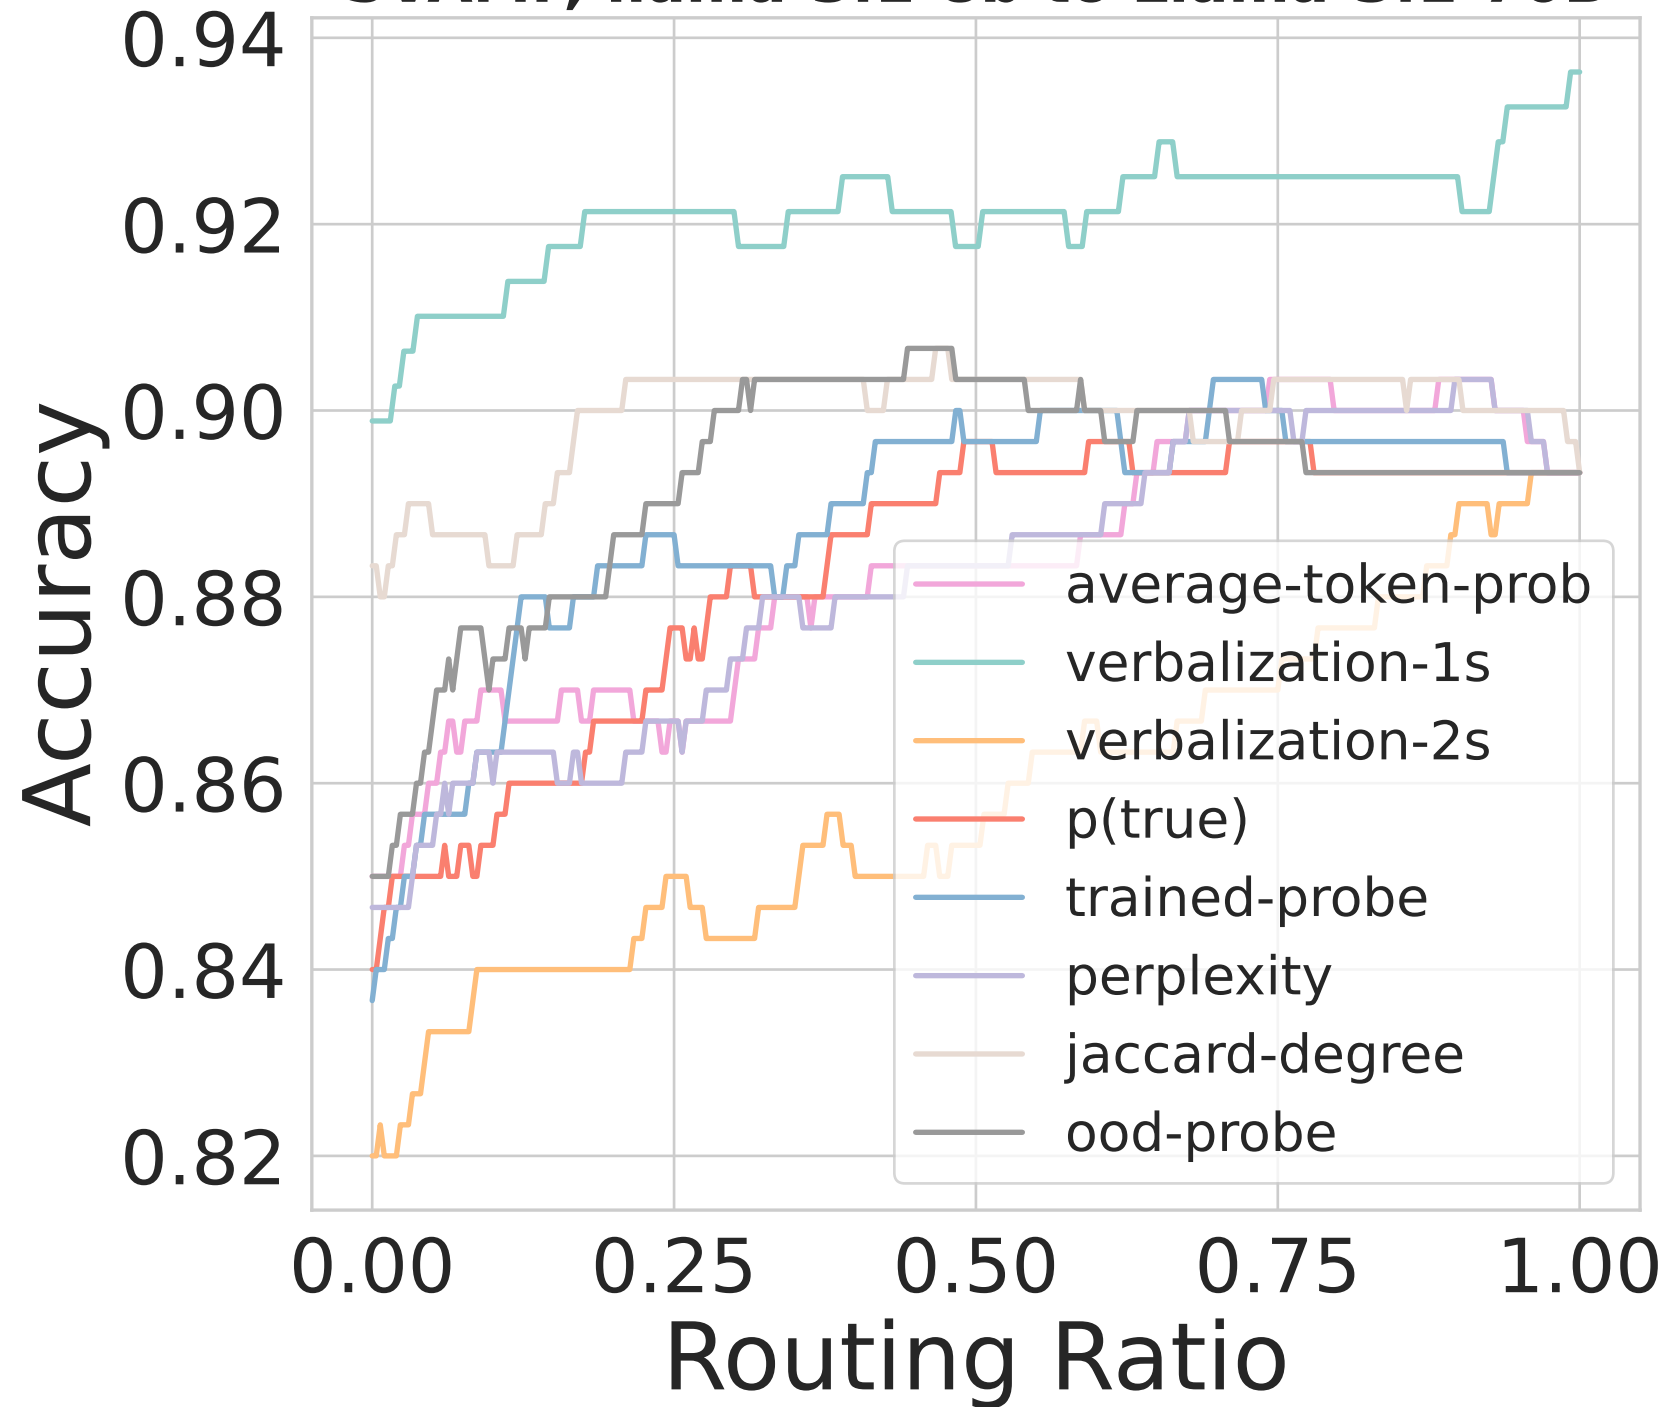

Supplement: supplementary_material [file rr_acc_svamp_llama-3.1-8b_llama70.pdf › Routing_SLM_LLMs/Uncertainty-based Routing/w_legend/to_llama70/rr_acc_svamp_llama-3.1-8b_llama70.pdf]

# SVAMP, llama-3.2-1b to Llama-3.1-70B

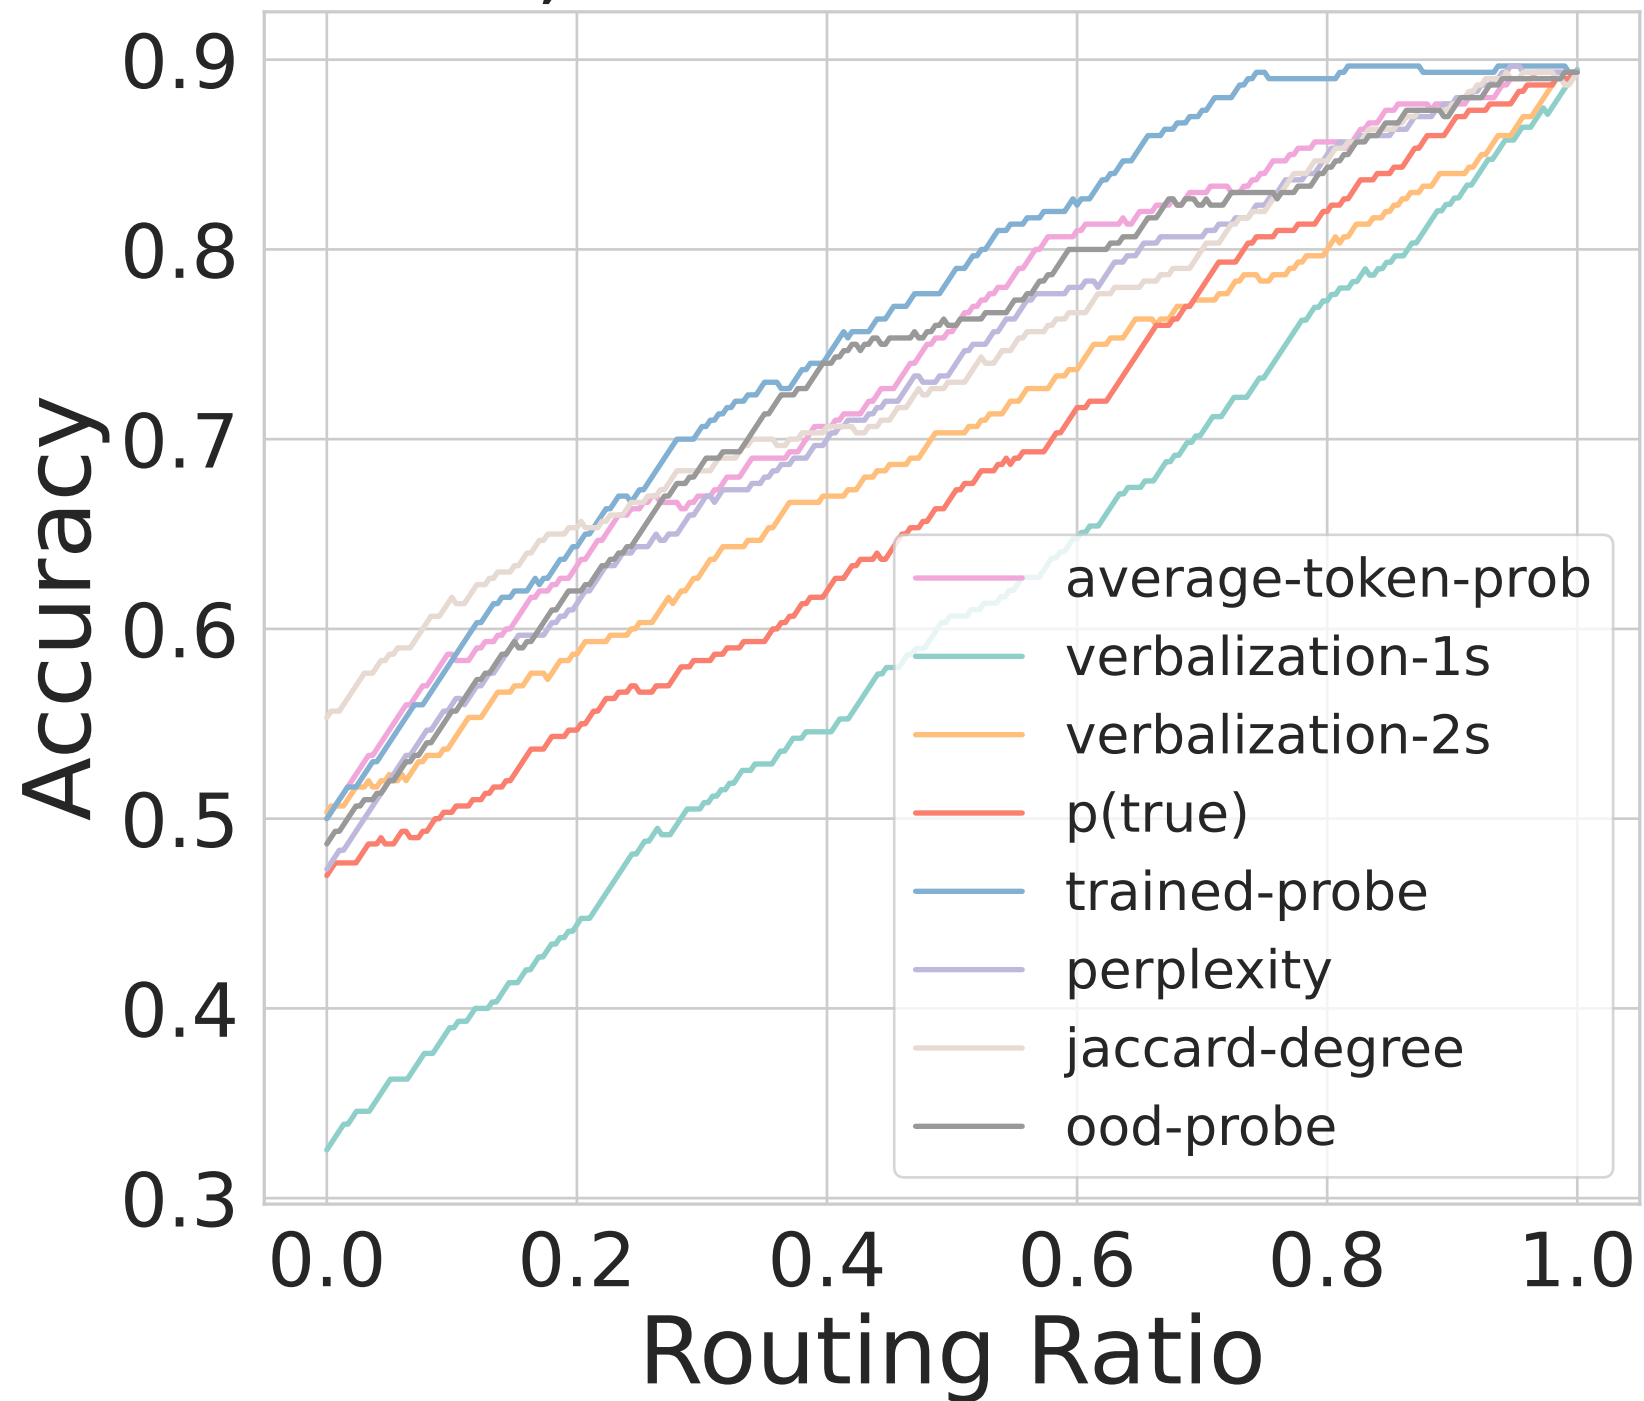

Supplement: supplementary_material [file rr_acc_svamp_llama-3.2-1b_llama70.pdf › Routing_SLM_LLMs/Uncertainty-based Routing/w_legend/to_llama70/rr_acc_svamp_llama-3.2-1b_llama70.pdf]

# SVAMP, llama-3.2-3b to Llama-3.1-70B

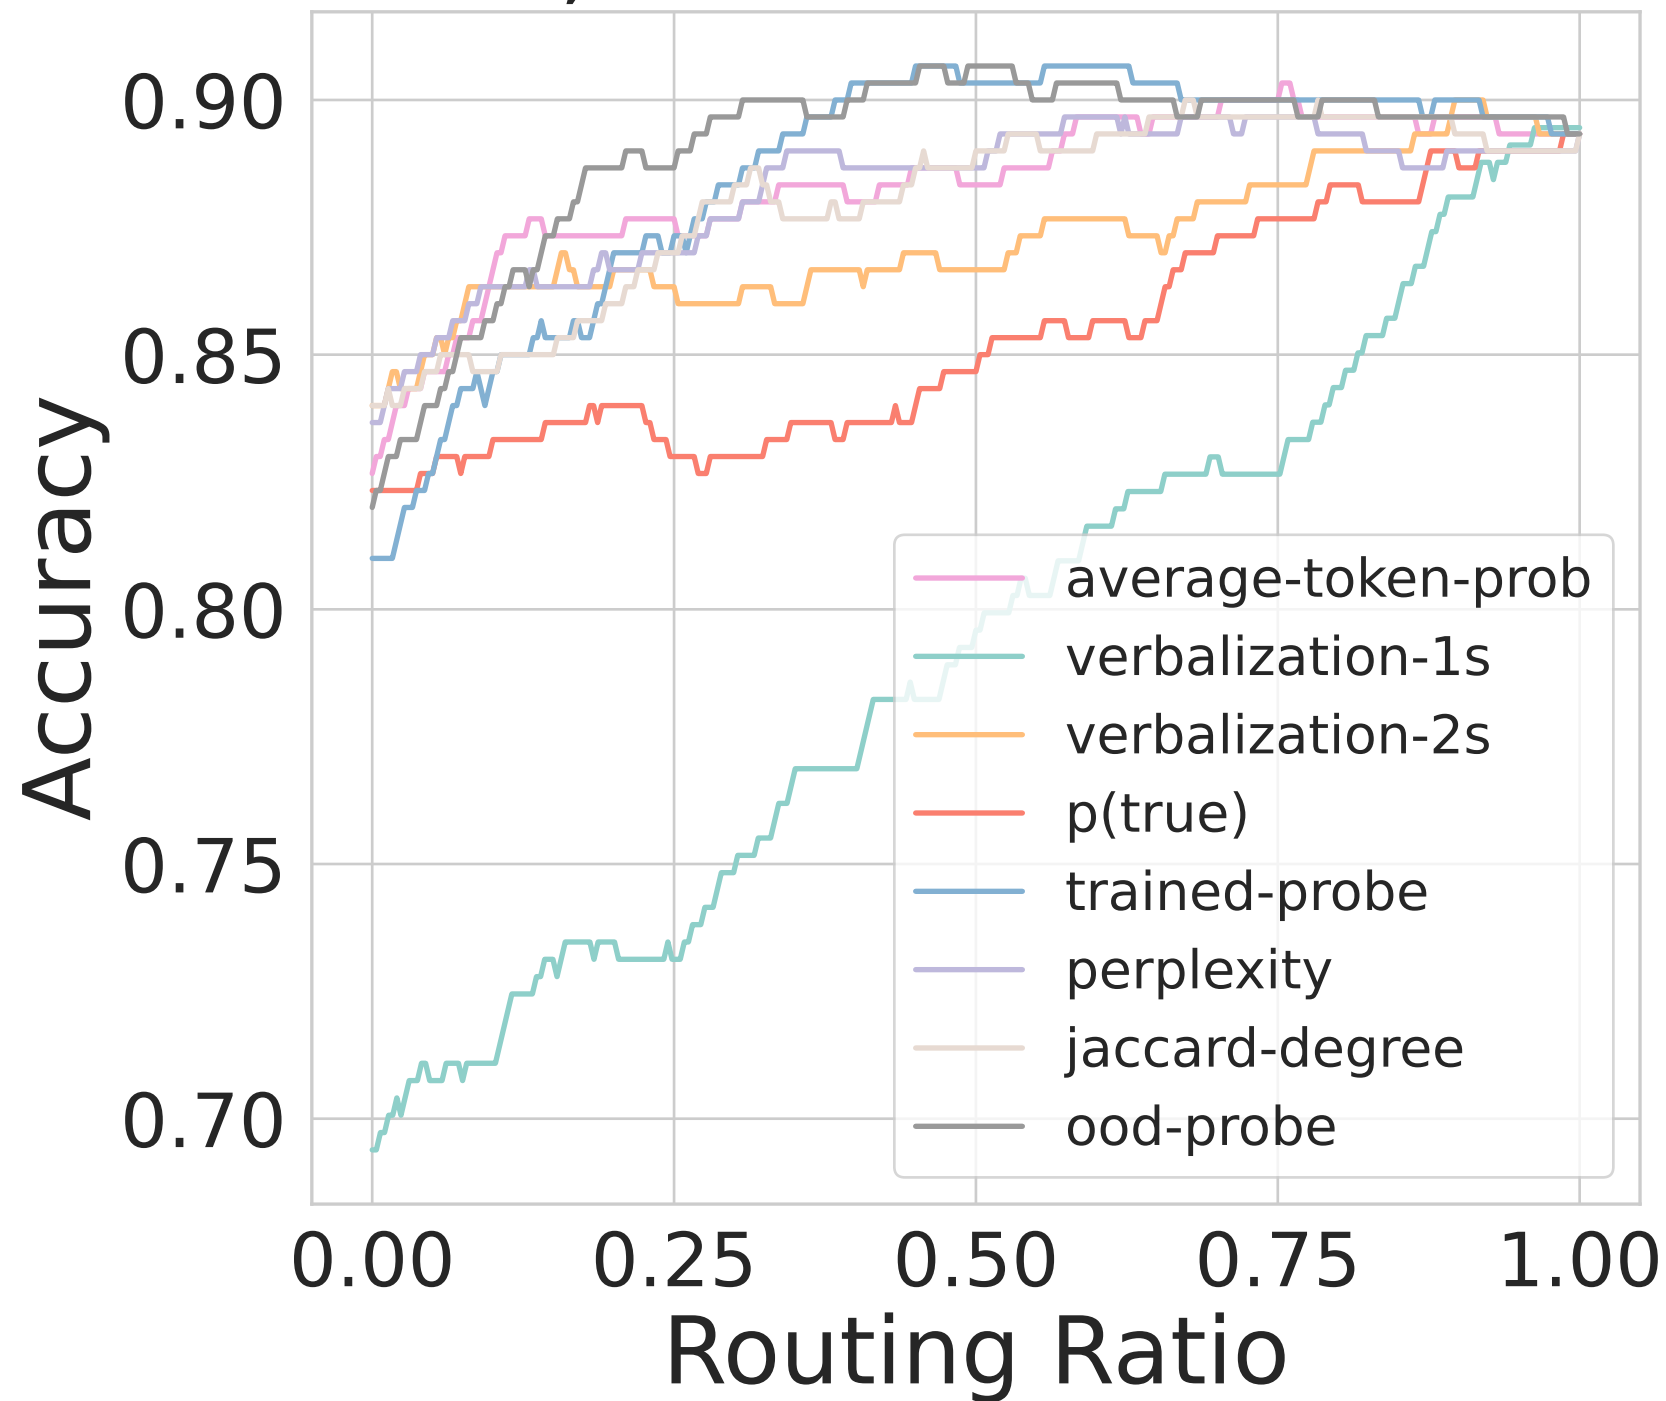

Supplement: supplementary_material [file rr_acc_svamp_llama-3.2-3b_llama70.pdf › Routing_SLM_LLMs/Uncertainty-based Routing/w_legend/to_llama70/rr_acc_svamp_llama-3.2-3b_llama70.pdf]

# SVAMP, mistral-7b to Llama-3.1-70B

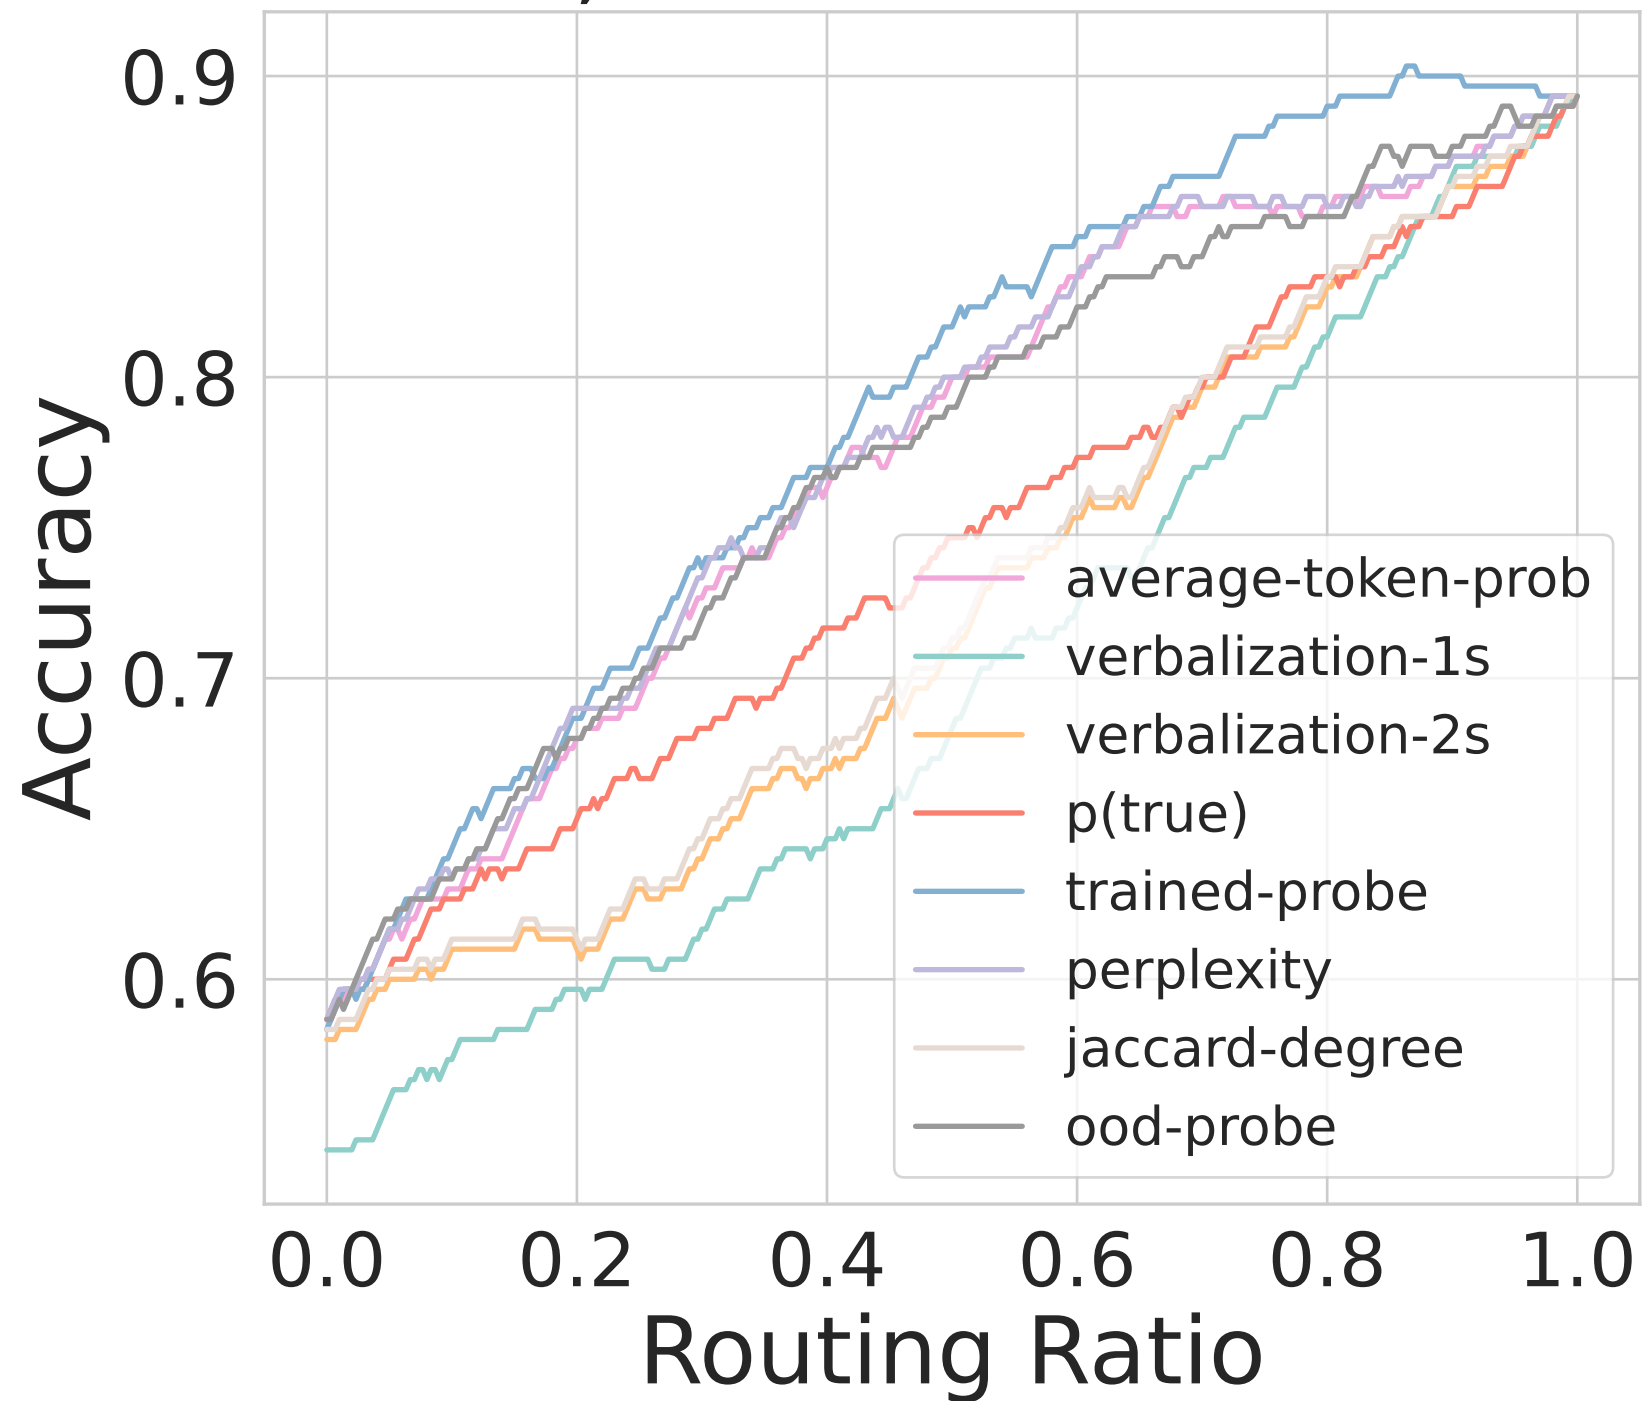

Supplement: supplementary_material [file rr_acc_svamp_mistral-7b_llama70.pdf › Routing_SLM_LLMs/Uncertainty-based Routing/w_legend/to_llama70/rr_acc_svamp_mistral-7b_llama70.pdf]

# SVAMP, phi-3.5-mini to Llama-3.1-70B

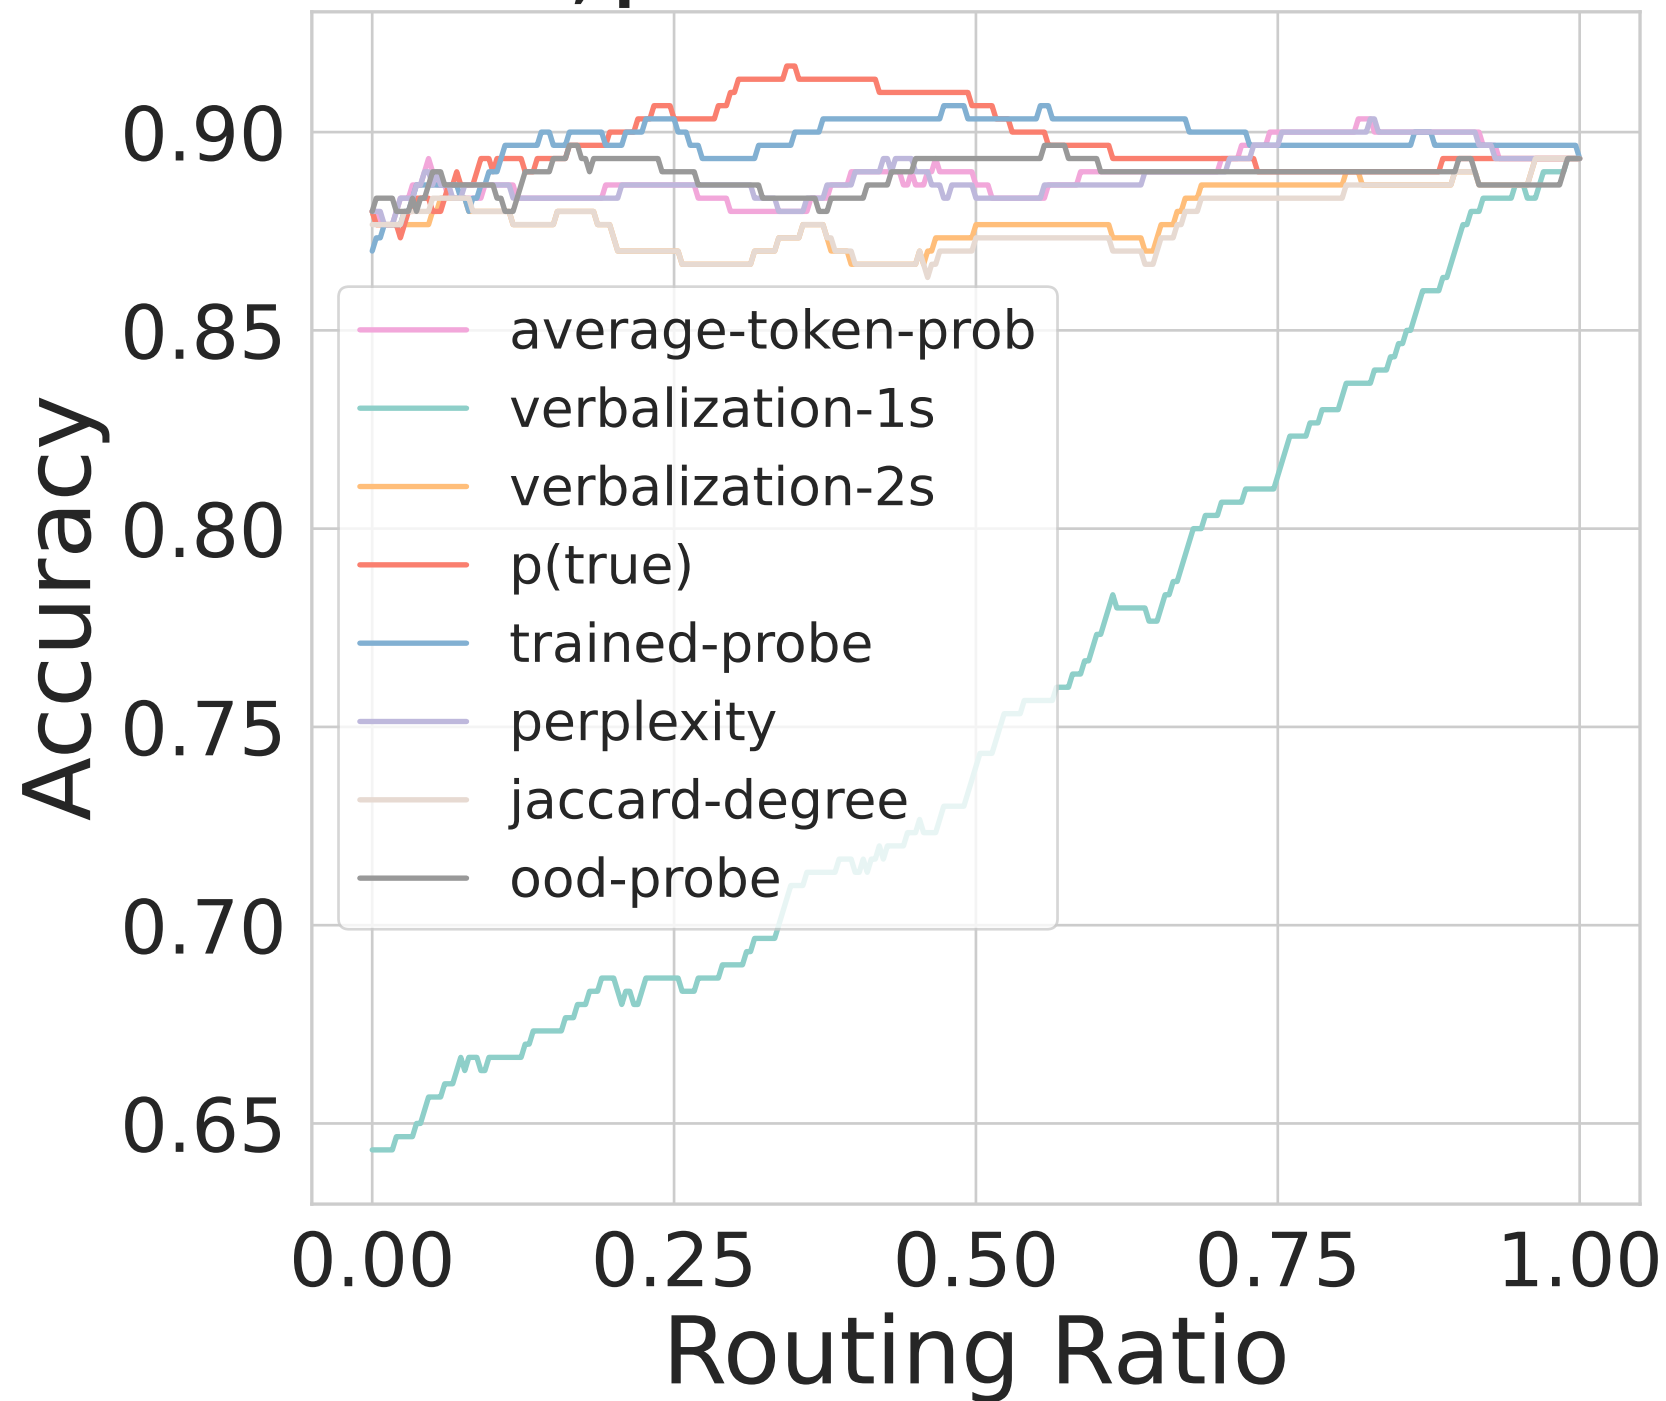

Supplement: supplementary_material [file rr_acc_svamp_phi-3.5-mini_llama70.pdf › Routing_SLM_LLMs/Uncertainty-based Routing/w_legend/to_llama70/rr_acc_svamp_phi-3.5-mini_llama70.pdf]

# SVAMP, phi-4-mini-reasoning to Llama-3.1-70B

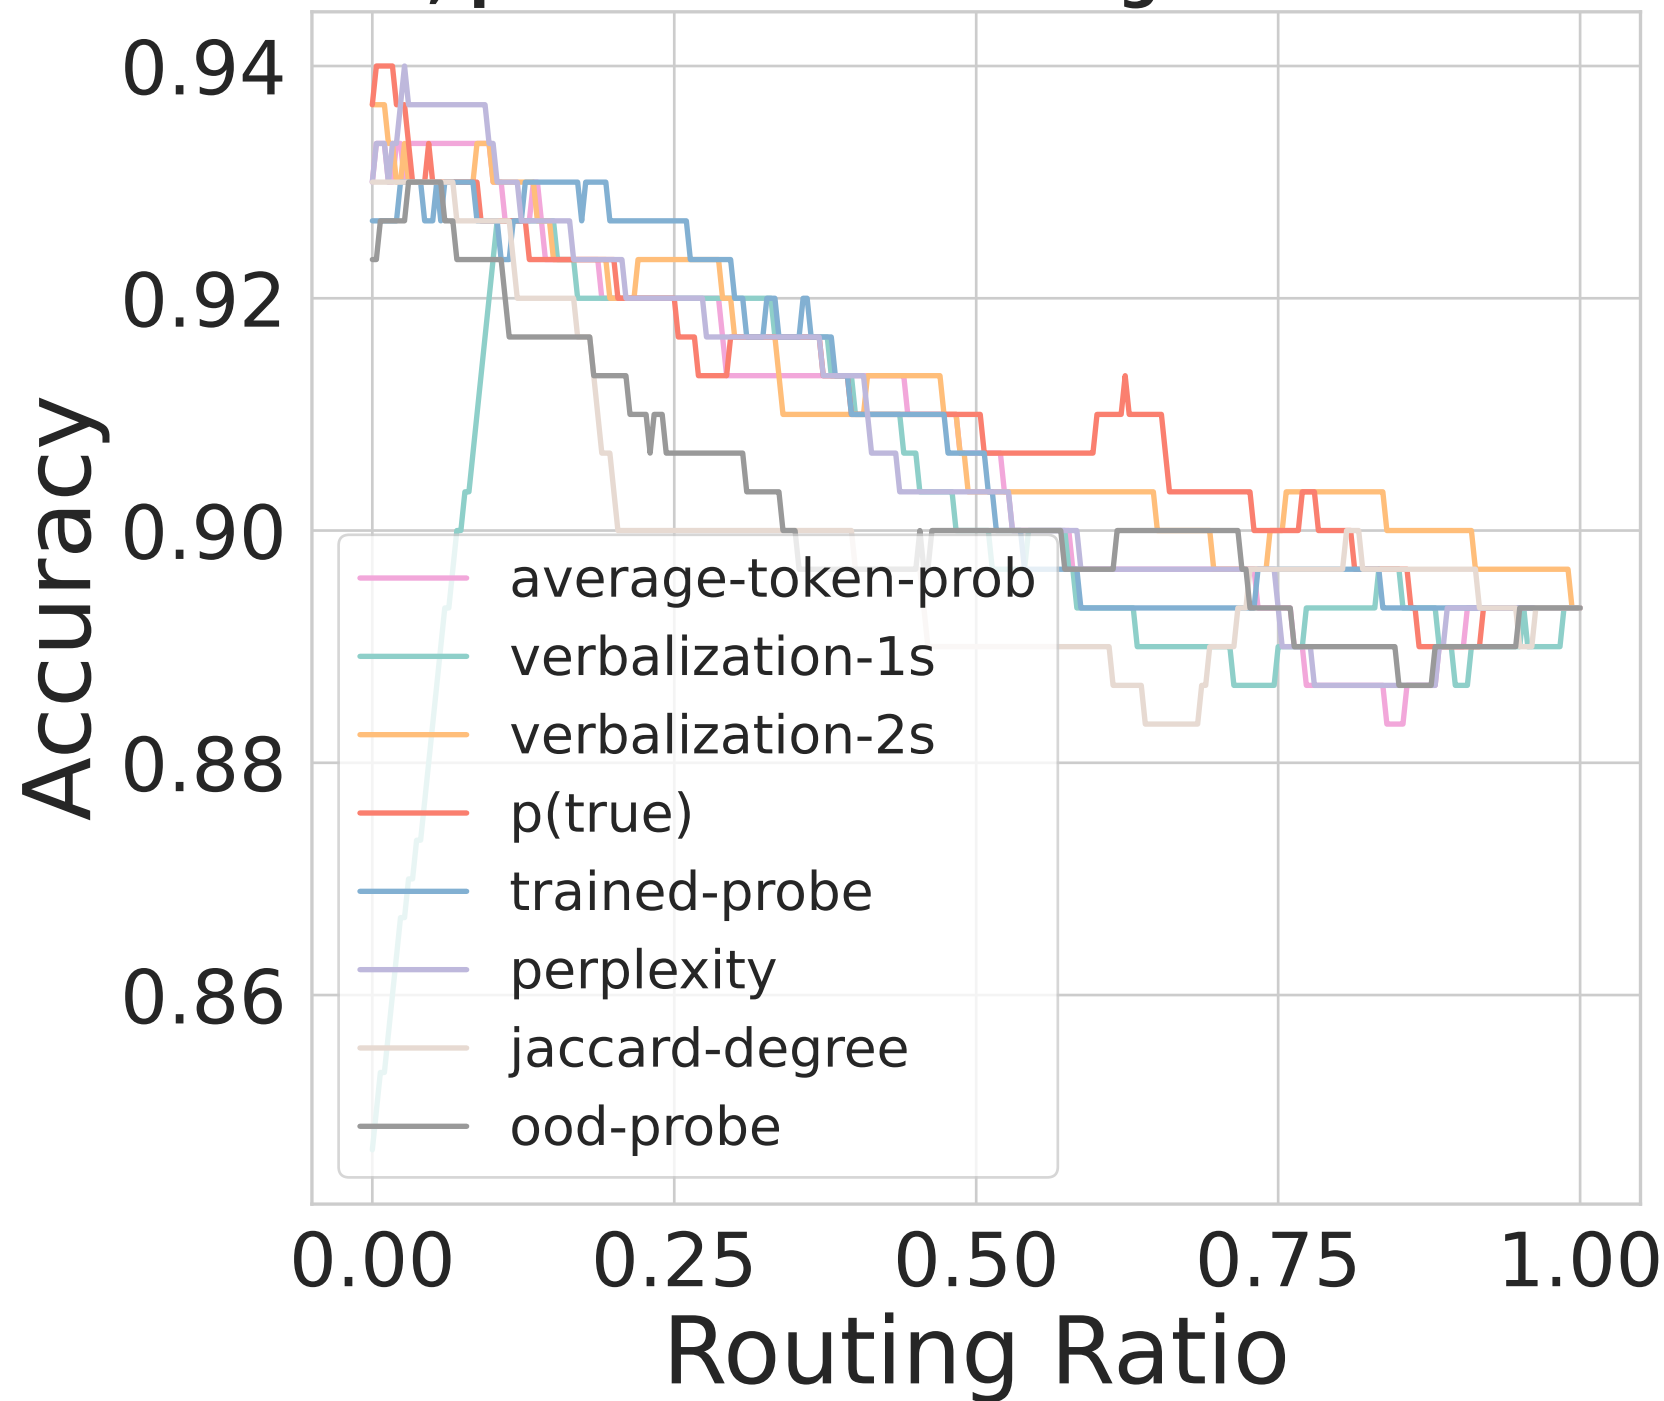

Supplement: supplementary_material [file rr_acc_svamp_phi-4-mini-reasoning_llama70.pdf › Routing_SLM_LLMs/Uncertainty-based Routing/w_legend/to_llama70/rr_acc_svamp_phi-4-mini-reasoning_llama70.pdf]

**SVAMP, qwen-2.5-7b to Llama-3.1-70B**

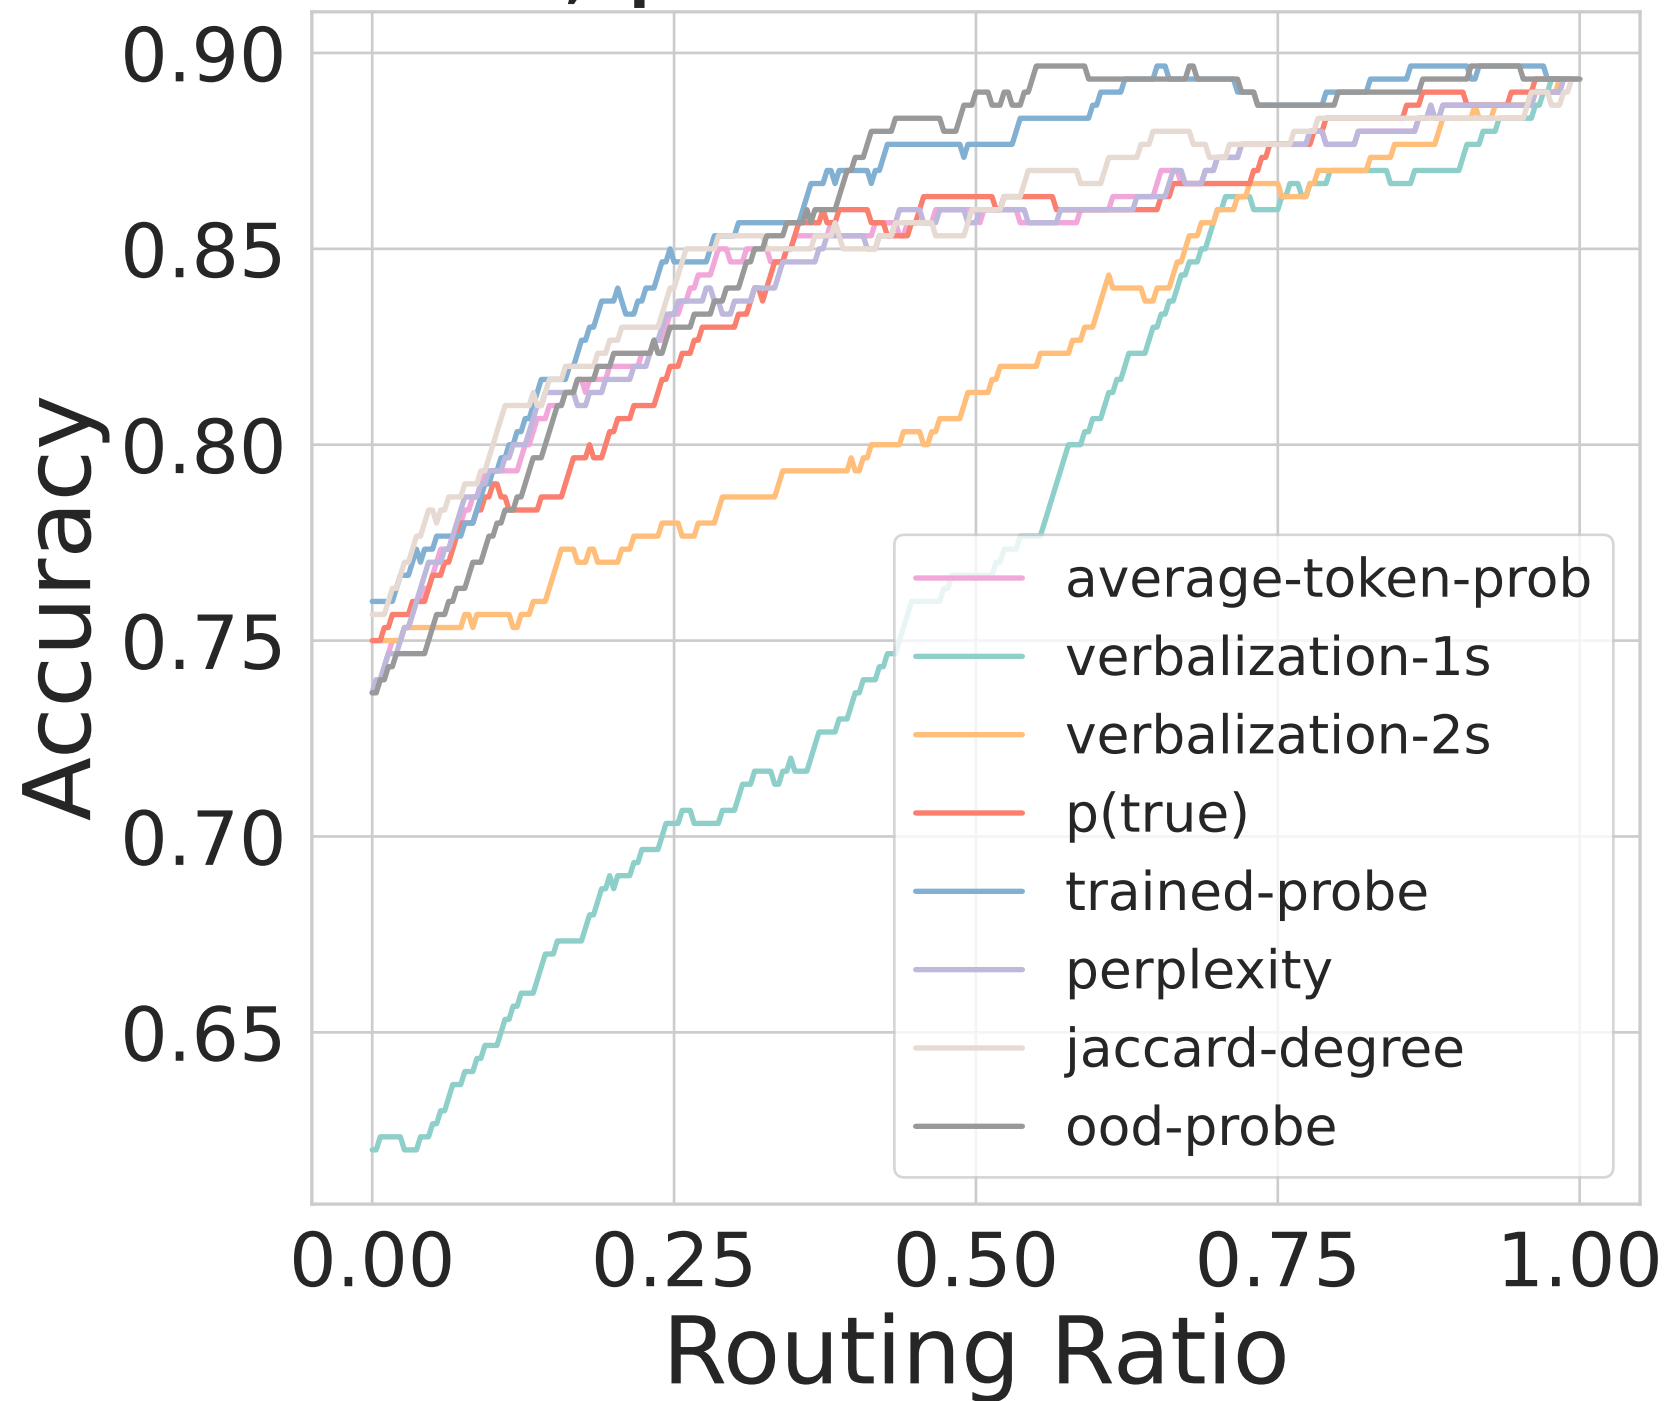

Supplement: supplementary_material [file rr_acc_svamp_qwen-2.5-7b_llama70.pdf › Routing_SLM_LLMs/Uncertainty-based Routing/w_legend/to_llama70/rr_acc_svamp_qwen-2.5-7b_llama70.pdf]

# SVAMP, rwkv to Llama-3.1-70B

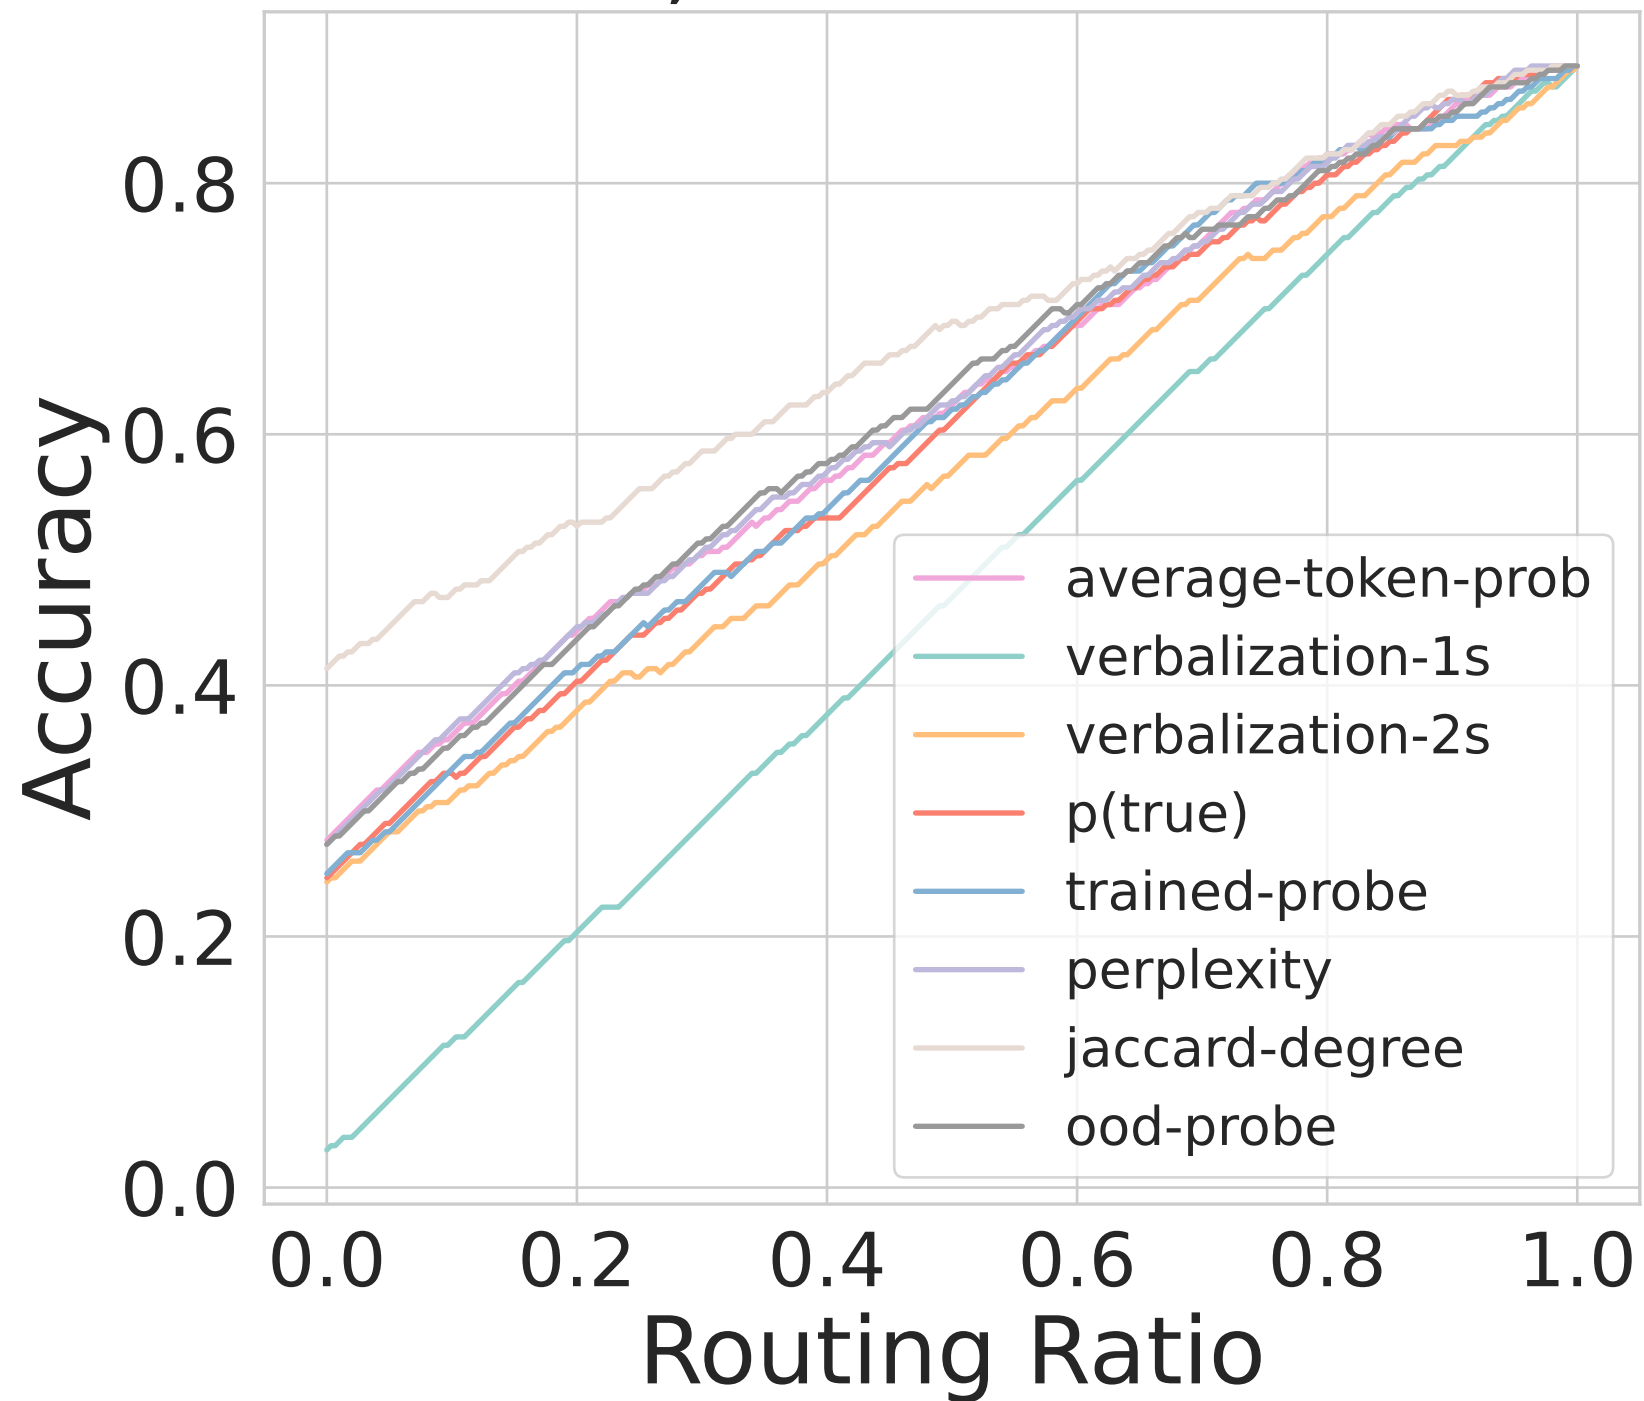

Supplement: supplementary_material [file rr_acc_svamp_rwkv_llama70.pdf › Routing_SLM_LLMs/Uncertainty-based Routing/w_legend/to_llama70/rr_acc_svamp_rwkv_llama70.pdf]

# TruthfulQA, Qwen3-0.6B to Llama-3.1-70B

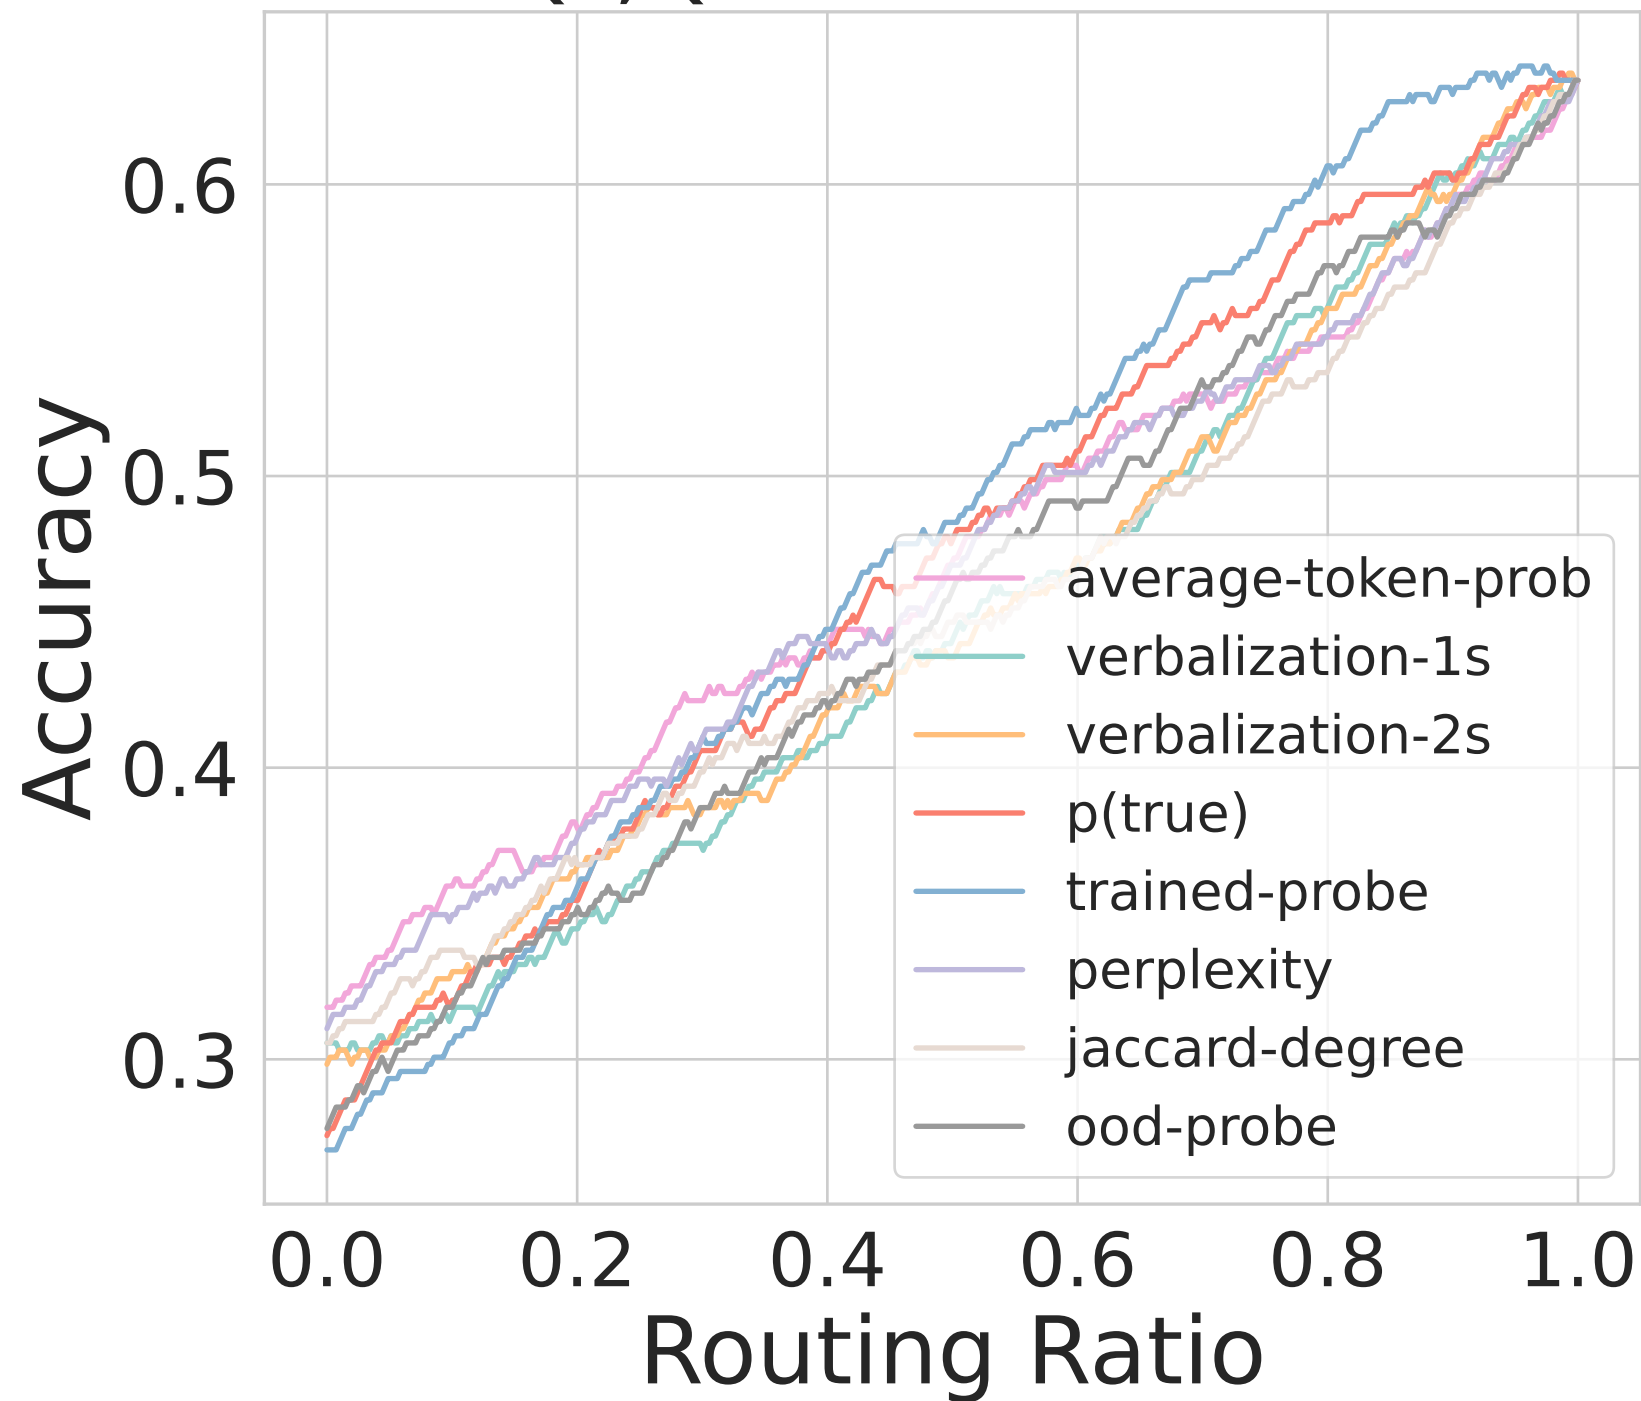

Supplement: supplementary_material [file rr_acc_truthful_qa_Qwen3-0.6B_llama70.pdf › Routing_SLM_LLMs/Uncertainty-based Routing/w_legend/to_llama70/rr_acc_truthful_qa_Qwen3-0.6B_llama70.pdf]

**TruthfulQA, Qwen3-1.7B to Llama-3.1-70B**

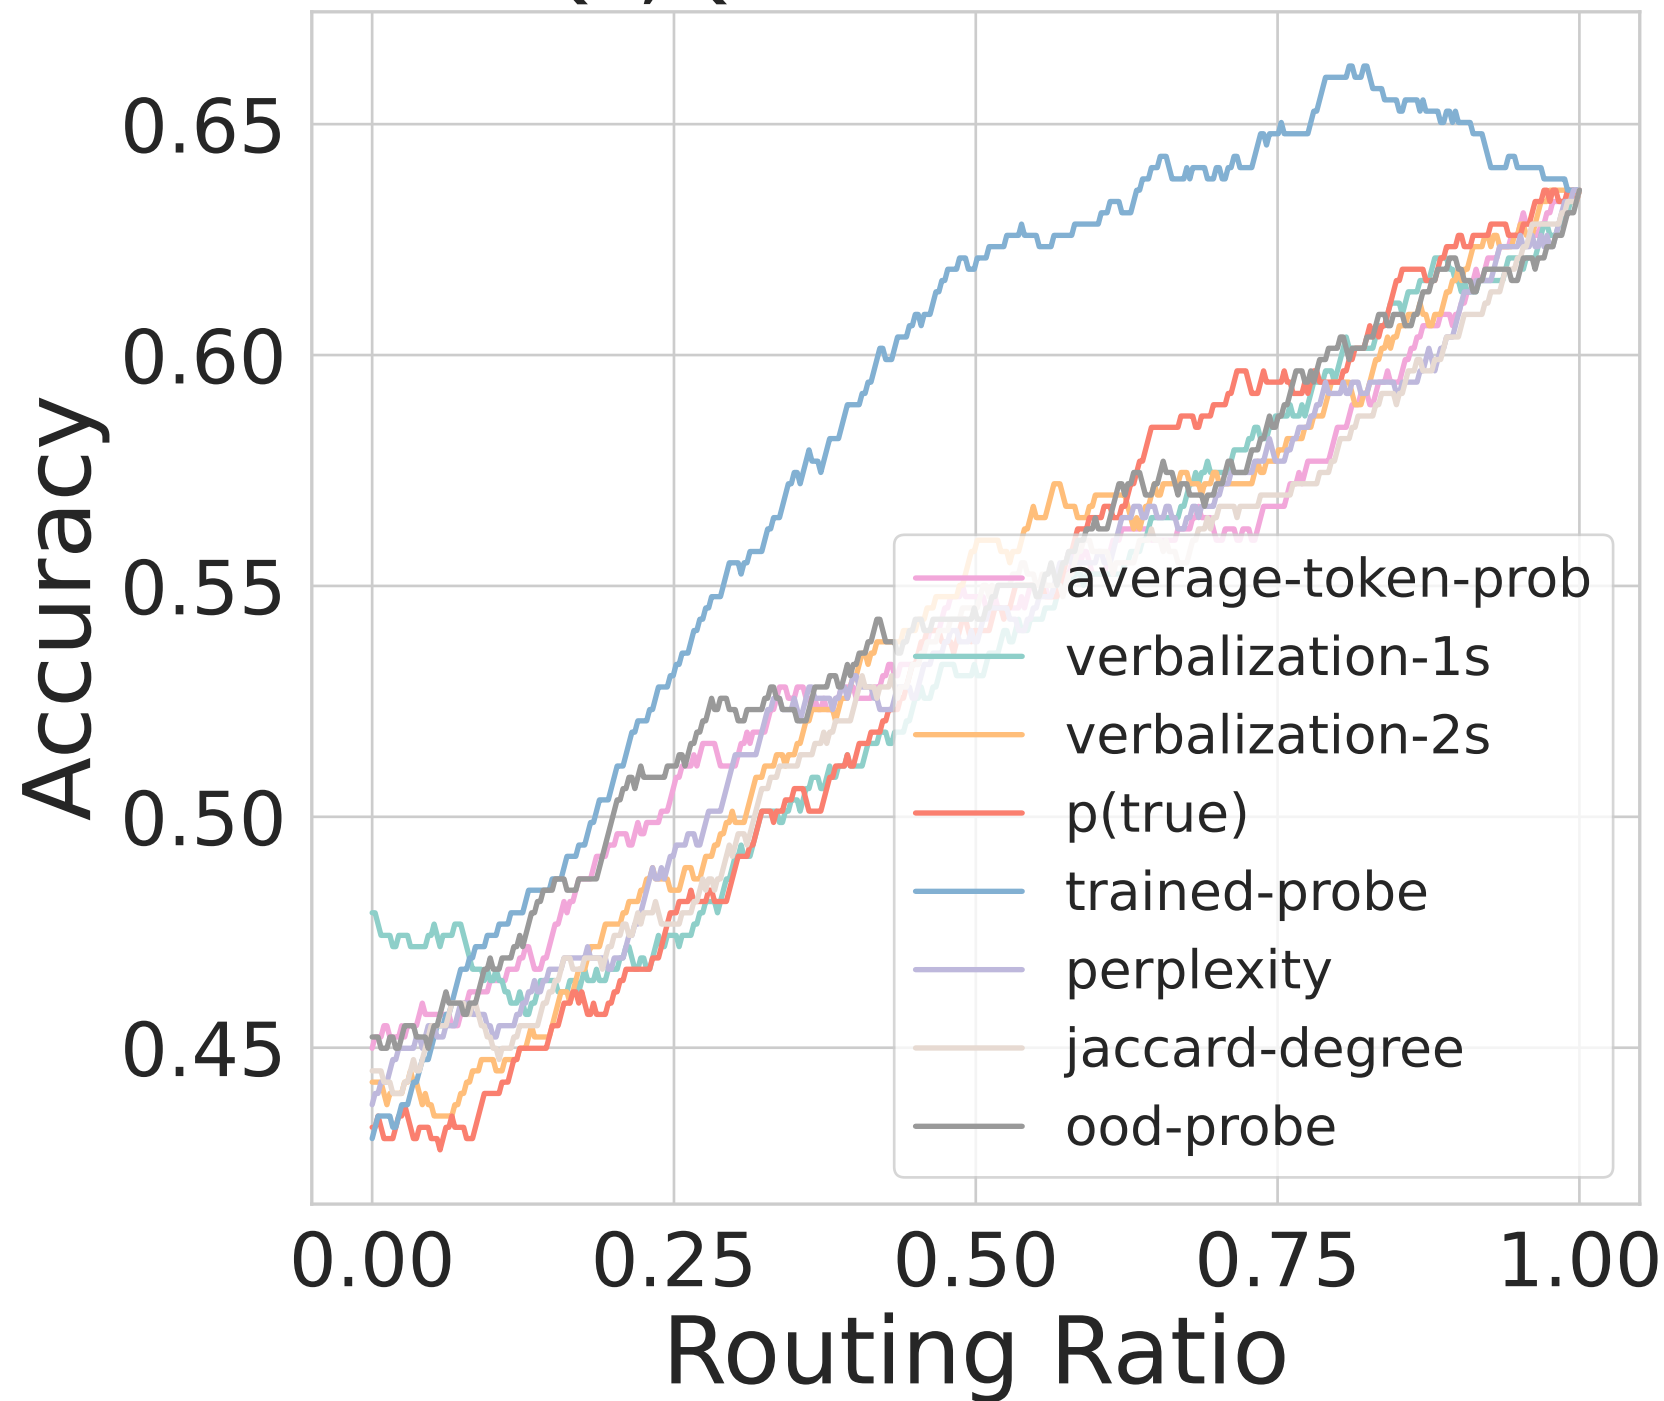

Supplement: supplementary_material [file rr_acc_truthful_qa_Qwen3-1.7B_llama70.pdf › Routing_SLM_LLMs/Uncertainty-based Routing/w_legend/to_llama70/rr_acc_truthful_qa_Qwen3-1.7B_llama70.pdf]

# TruthfulQA, Qwen3-4B to Llama-3.1-70B

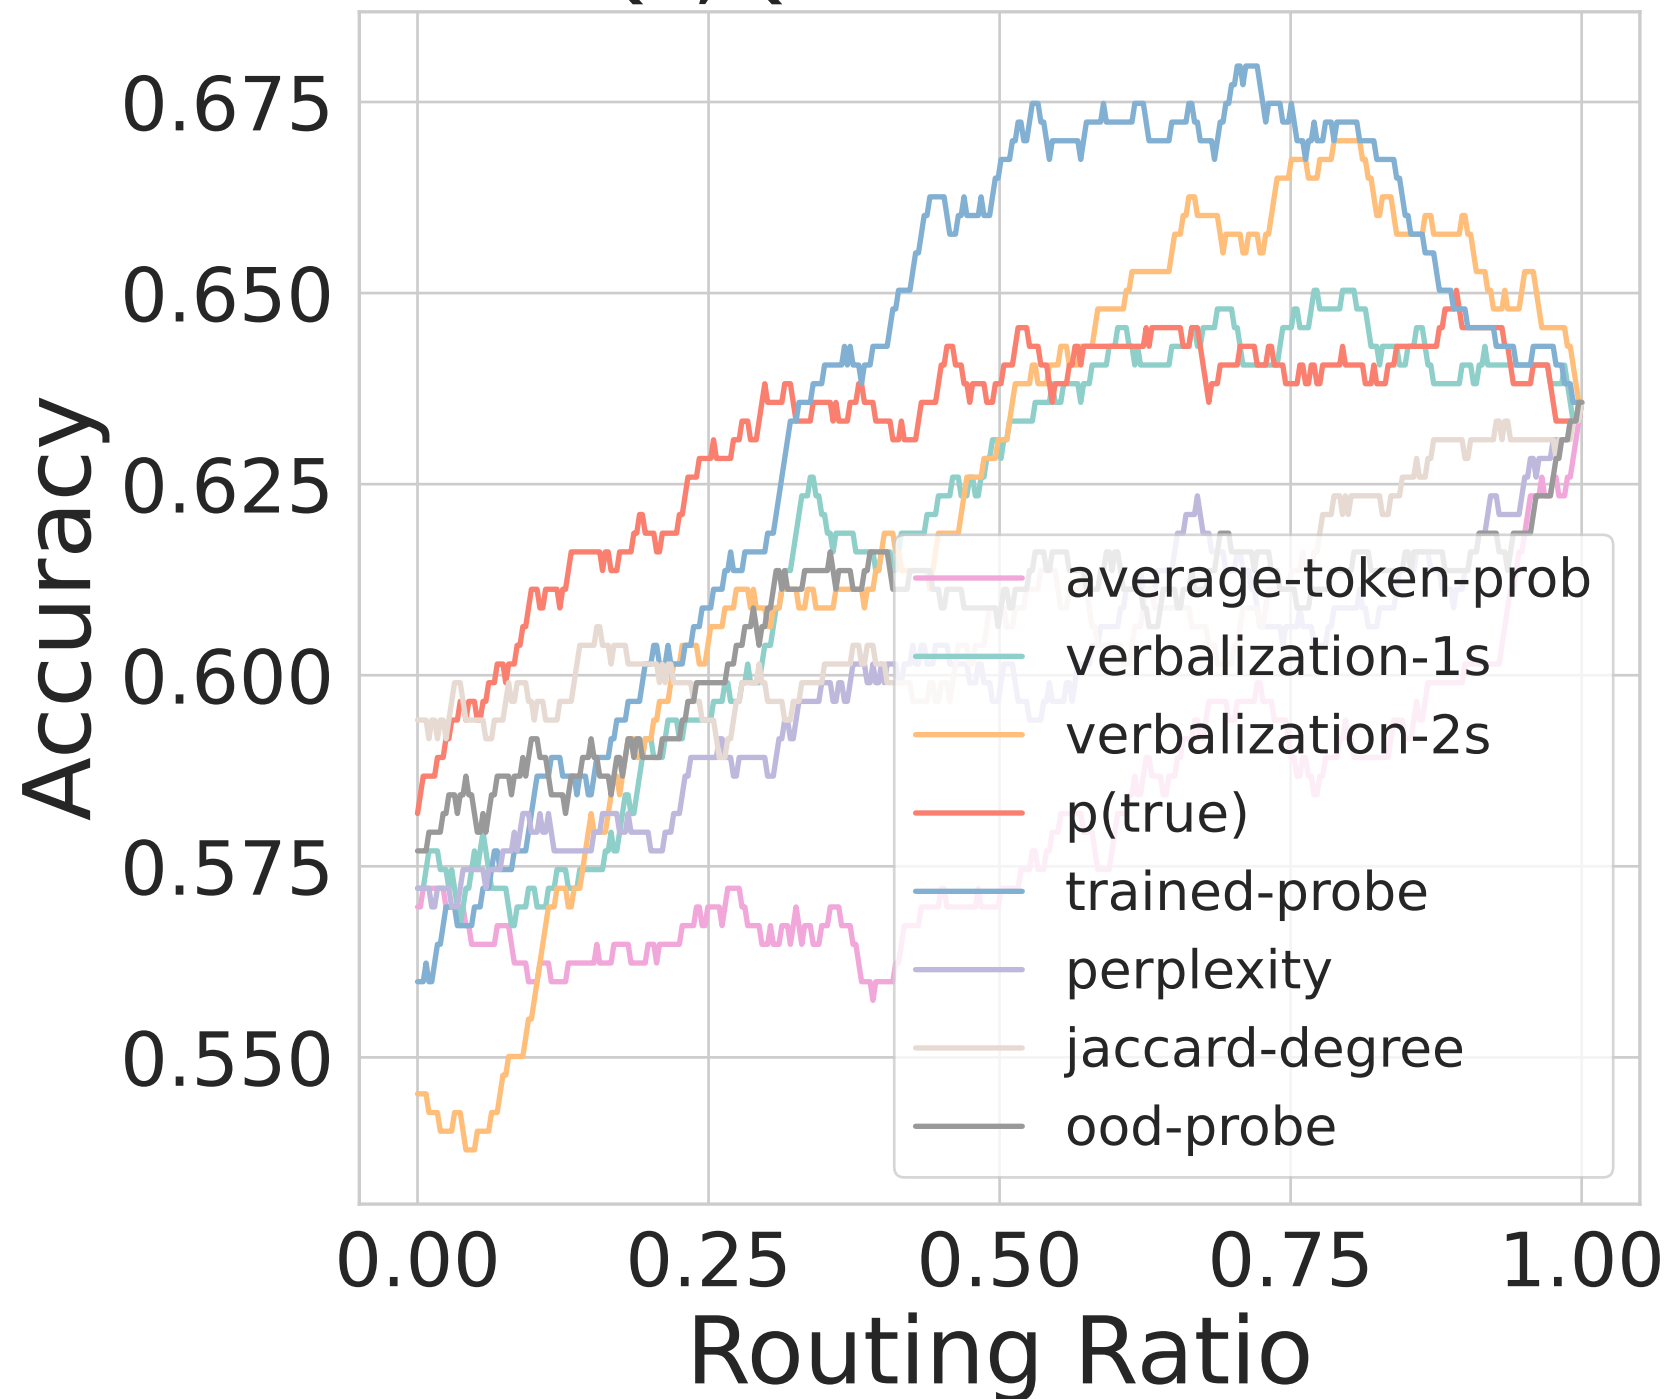

Supplement: supplementary_material [file rr_acc_truthful_qa_Qwen3-4B_llama70.pdf › Routing_SLM_LLMs/Uncertainty-based Routing/w_legend/to_llama70/rr_acc_truthful_qa_Qwen3-4B_llama70.pdf]

# TruthfulQA, llama-3.1-8b to Llama-3.1-70B

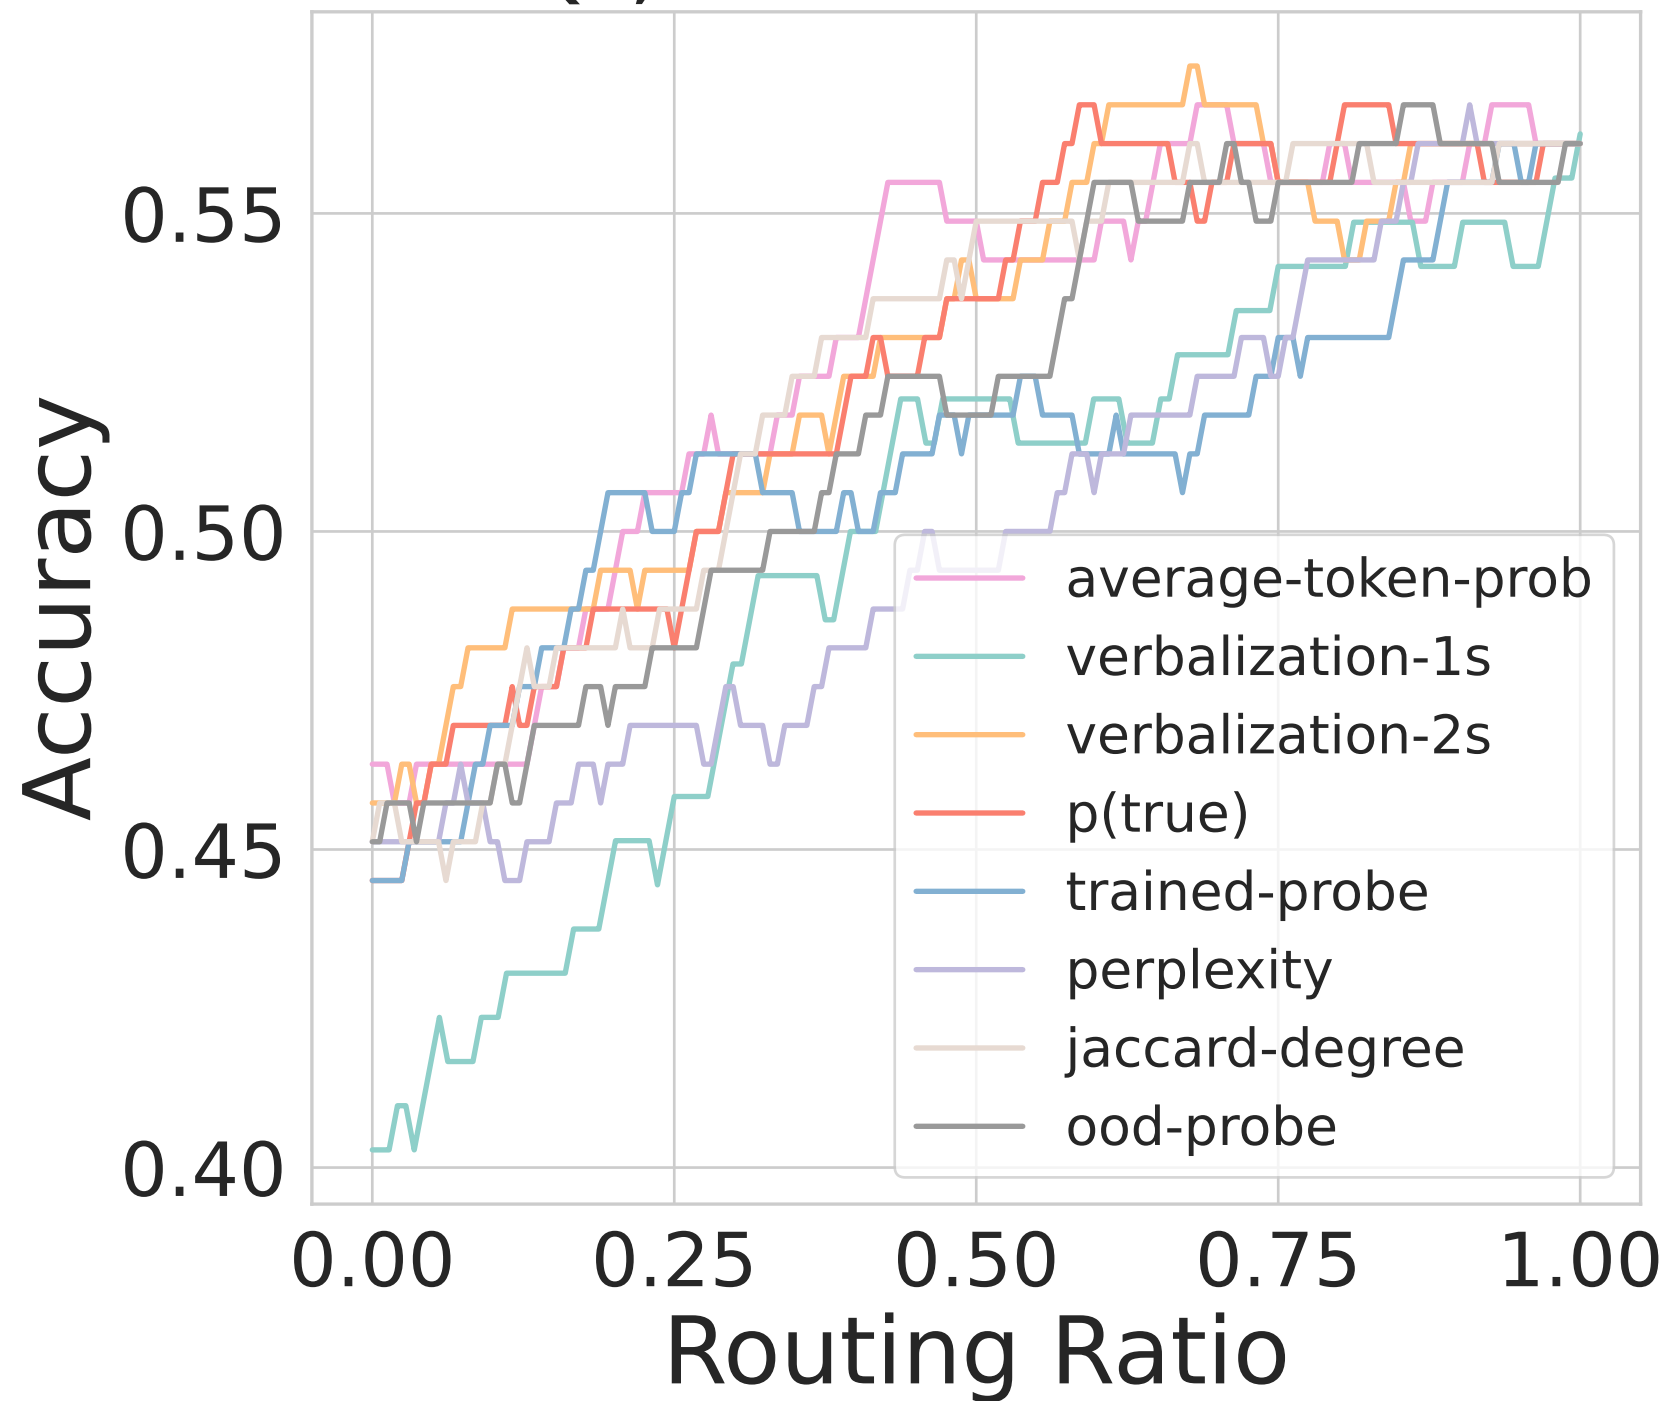

Supplement: supplementary_material [file rr_acc_truthful_qa_llama-3.1-8b_llama70.pdf › Routing_SLM_LLMs/Uncertainty-based Routing/w_legend/to_llama70/rr_acc_truthful_qa_llama-3.1-8b_llama70.pdf]

**TruthfulQA, llama-3.2-1b to Llama-3.1-70B**

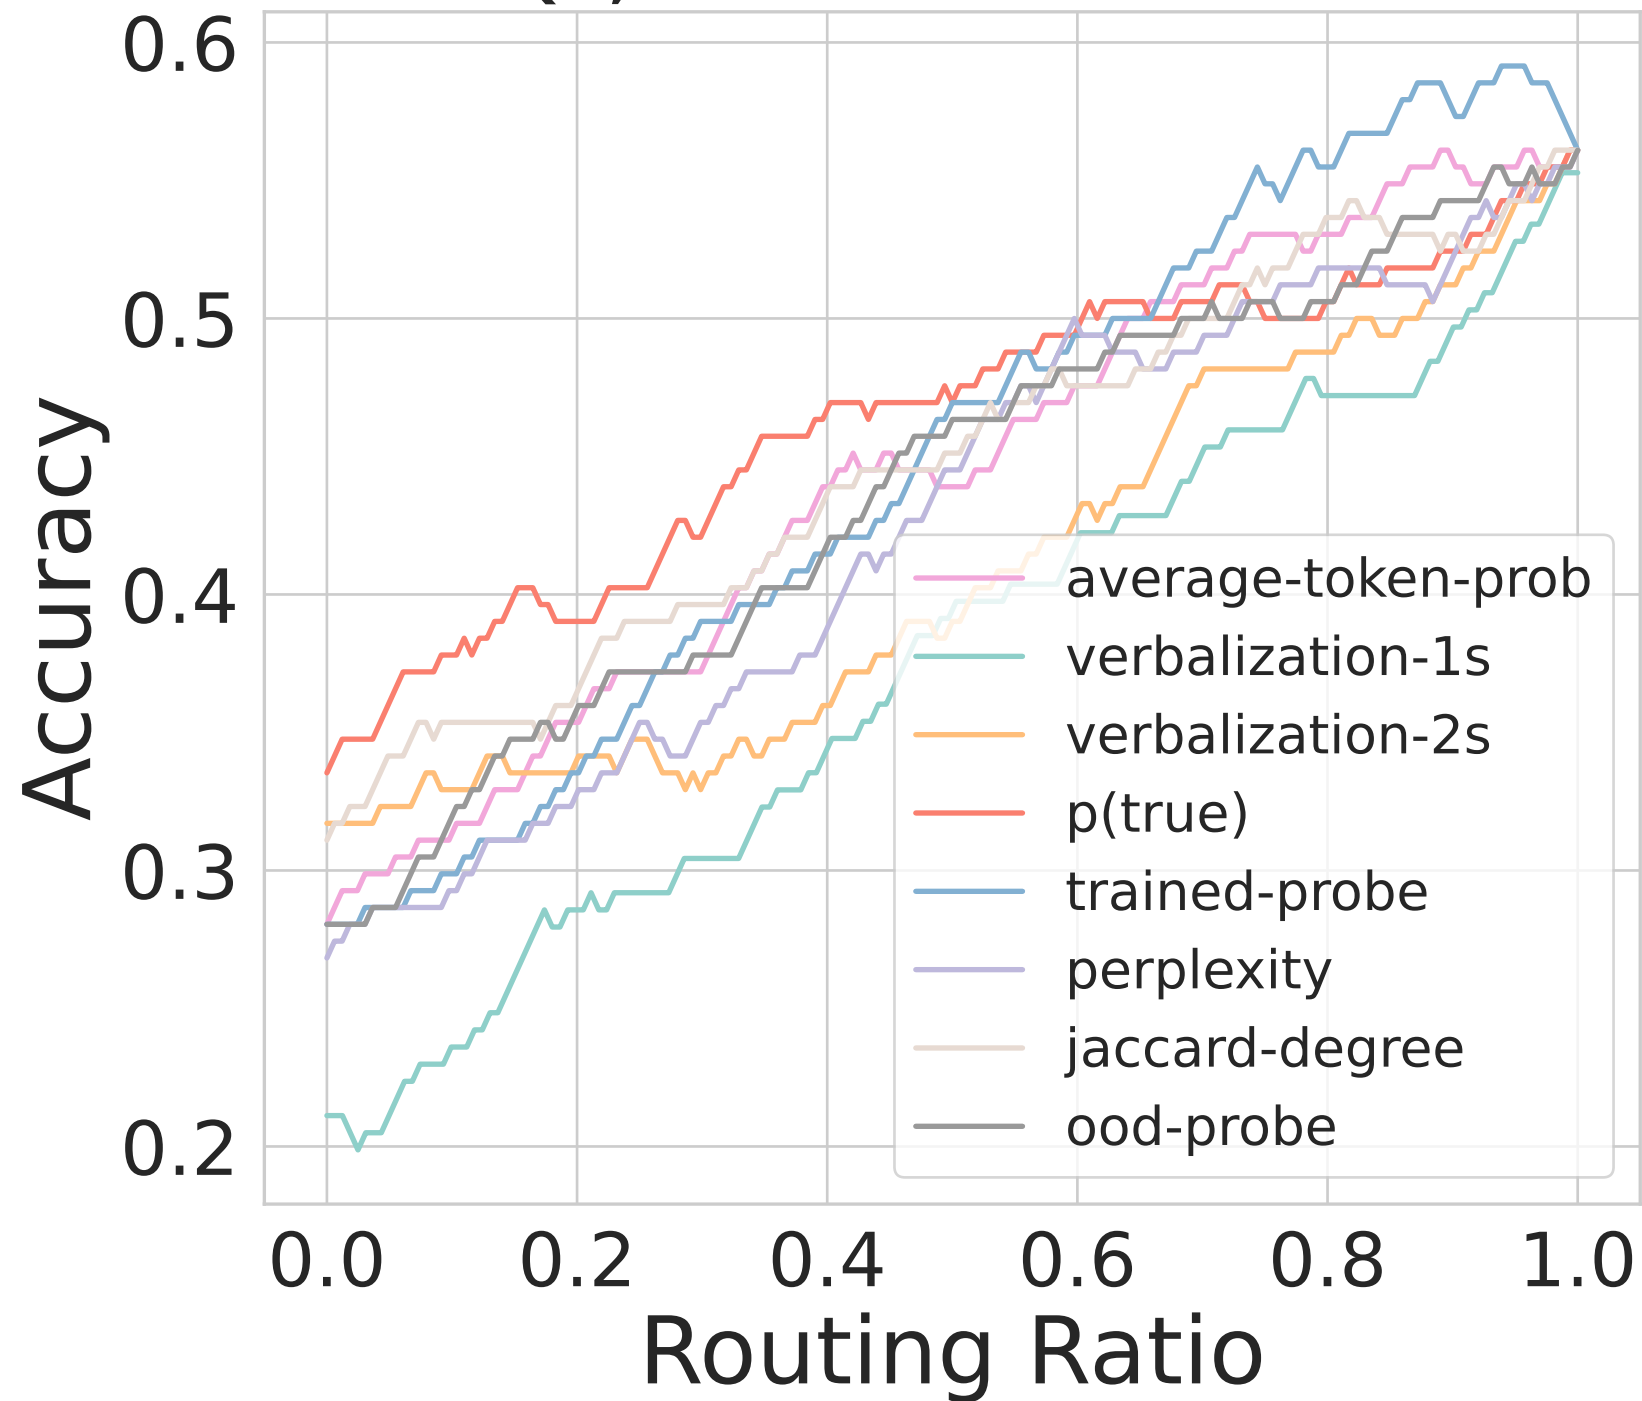

Supplement: supplementary_material [file rr_acc_truthful_qa_llama-3.2-1b_llama70.pdf › Routing_SLM_LLMs/Uncertainty-based Routing/w_legend/to_llama70/rr_acc_truthful_qa_llama-3.2-1b_llama70.pdf]

**TruthfulQA, llama-3.2-3b to Llama-3.1-70B**

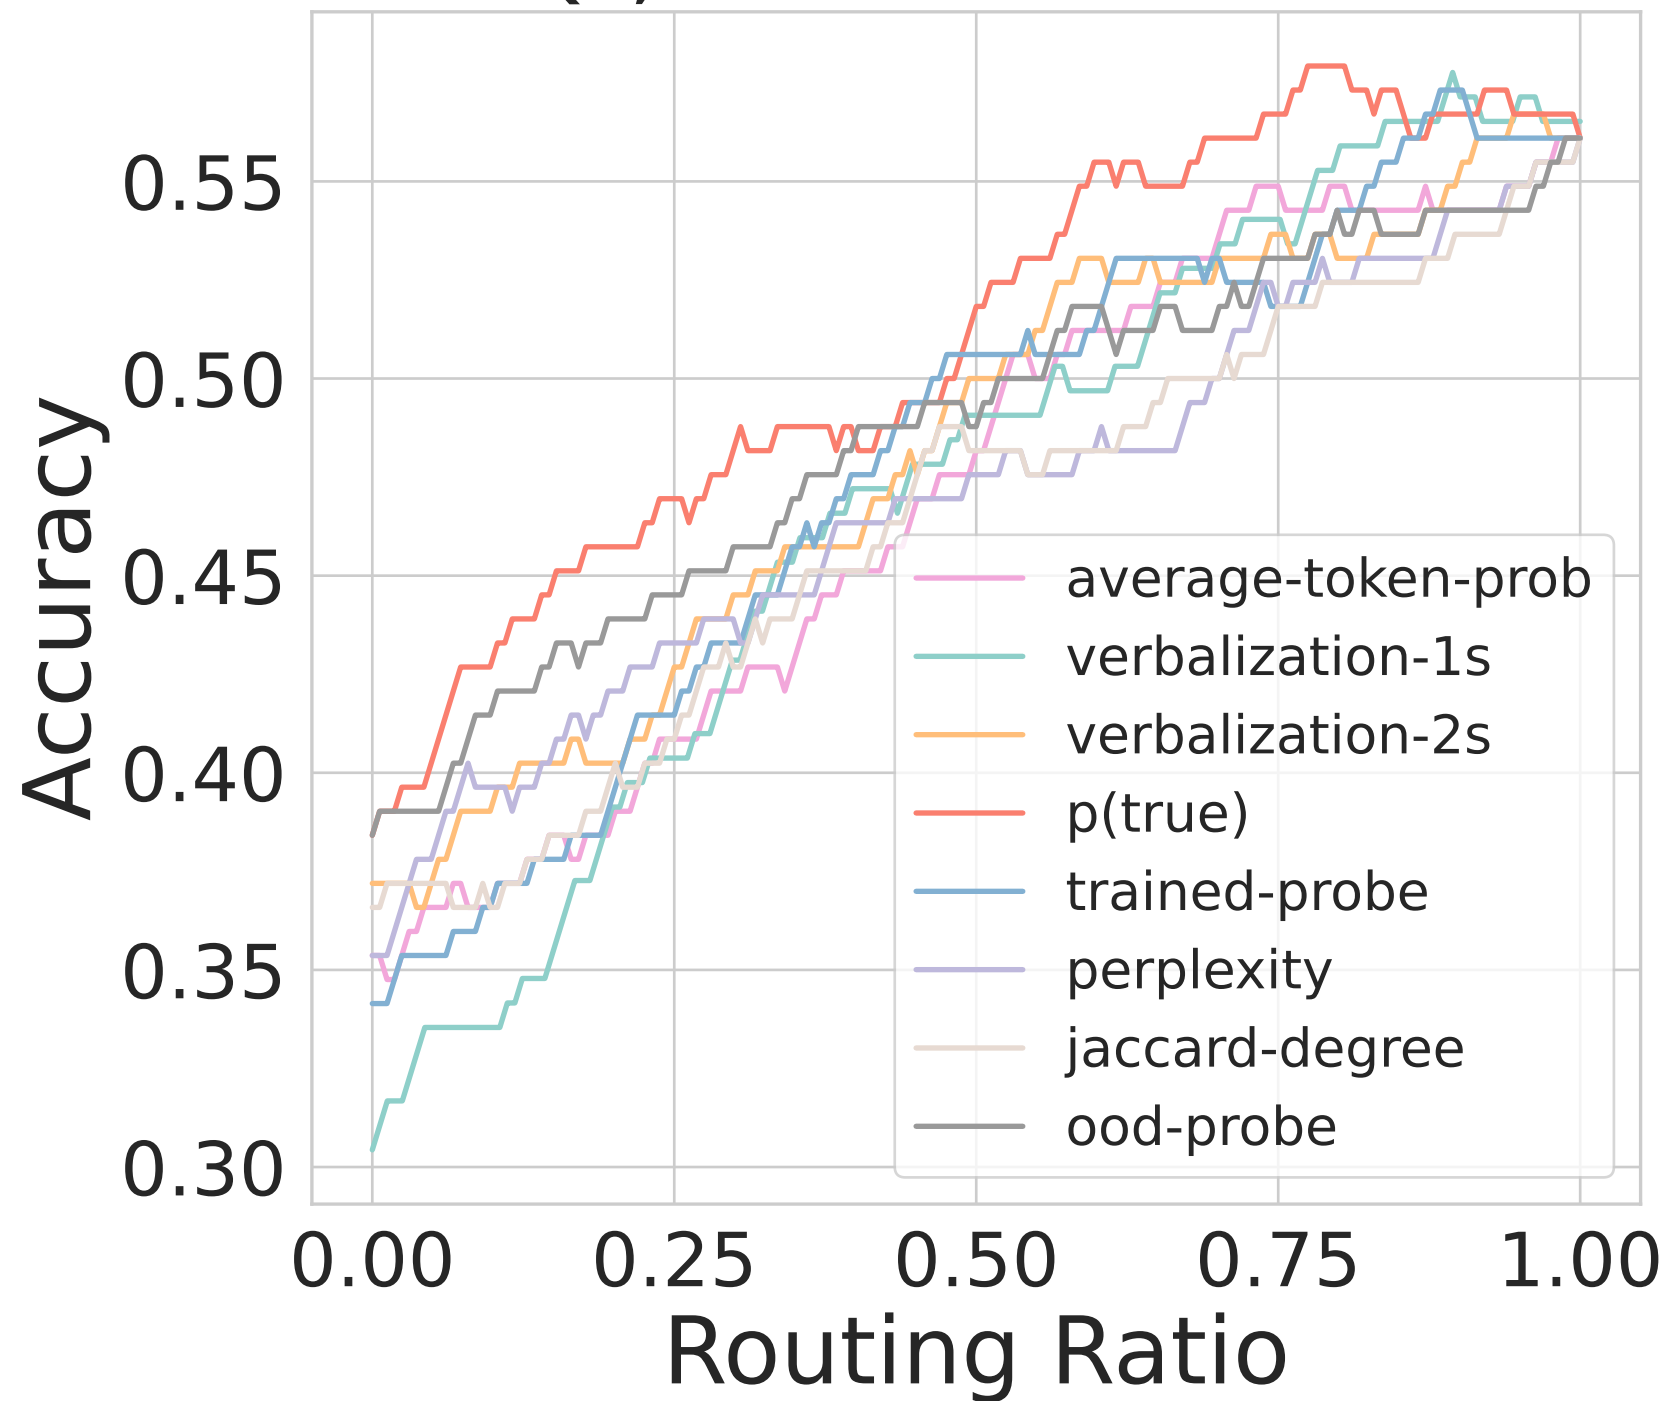

Supplement: supplementary_material [file rr_acc_truthful_qa_llama-3.2-3b_llama70.pdf › Routing_SLM_LLMs/Uncertainty-based Routing/w_legend/to_llama70/rr_acc_truthful_qa_llama-3.2-3b_llama70.pdf]

## TruthfulQA, mistral-7b to Llama-3.1-70B

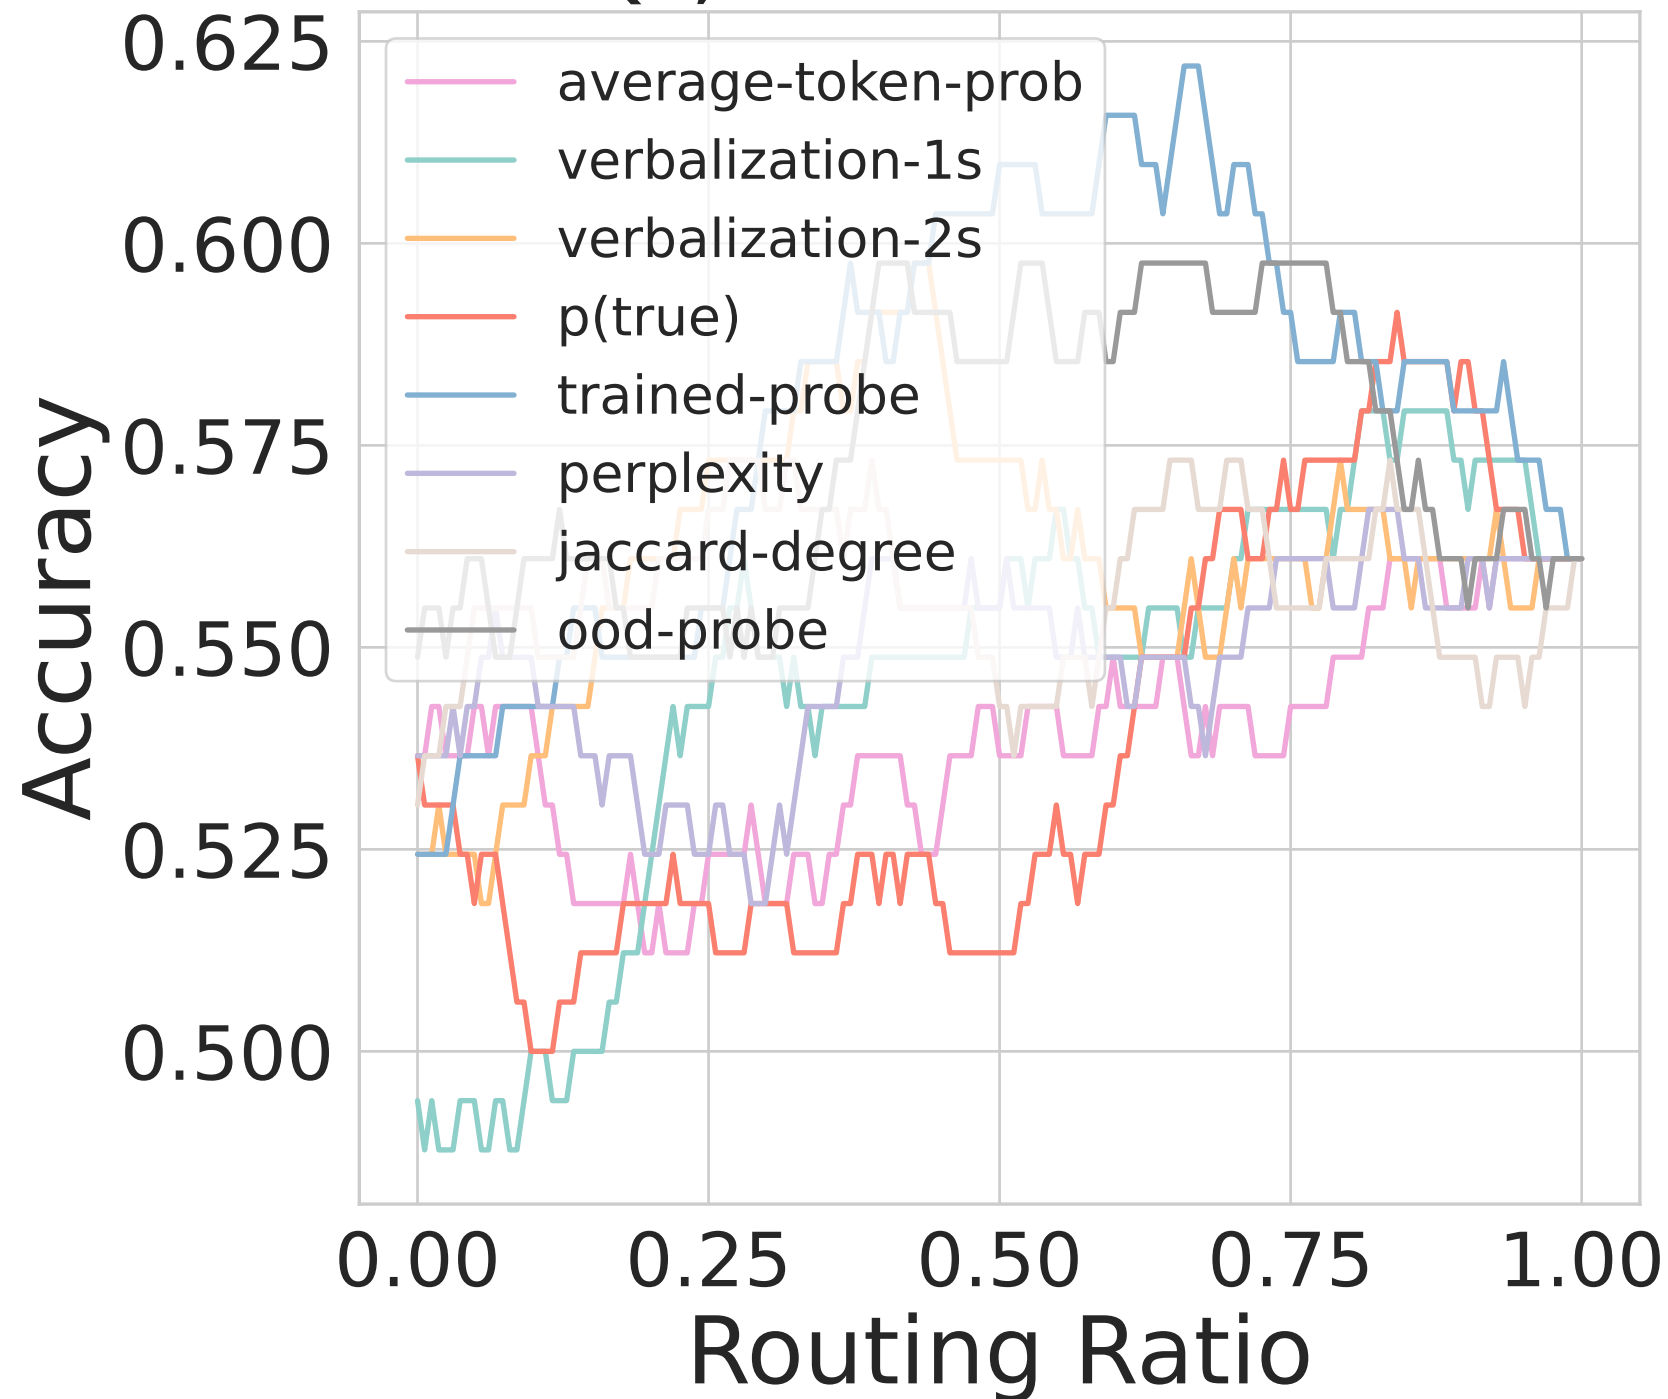

Supplement: supplementary_material [file rr_acc_truthful_qa_mistral-7b_llama70.pdf › Routing_SLM_LLMs/Uncertainty-based Routing/w_legend/to_llama70/rr_acc_truthful_qa_mistral-7b_llama70.pdf]

# TruthfulQA, phi-3.5-mini to Llama-3.1-70B

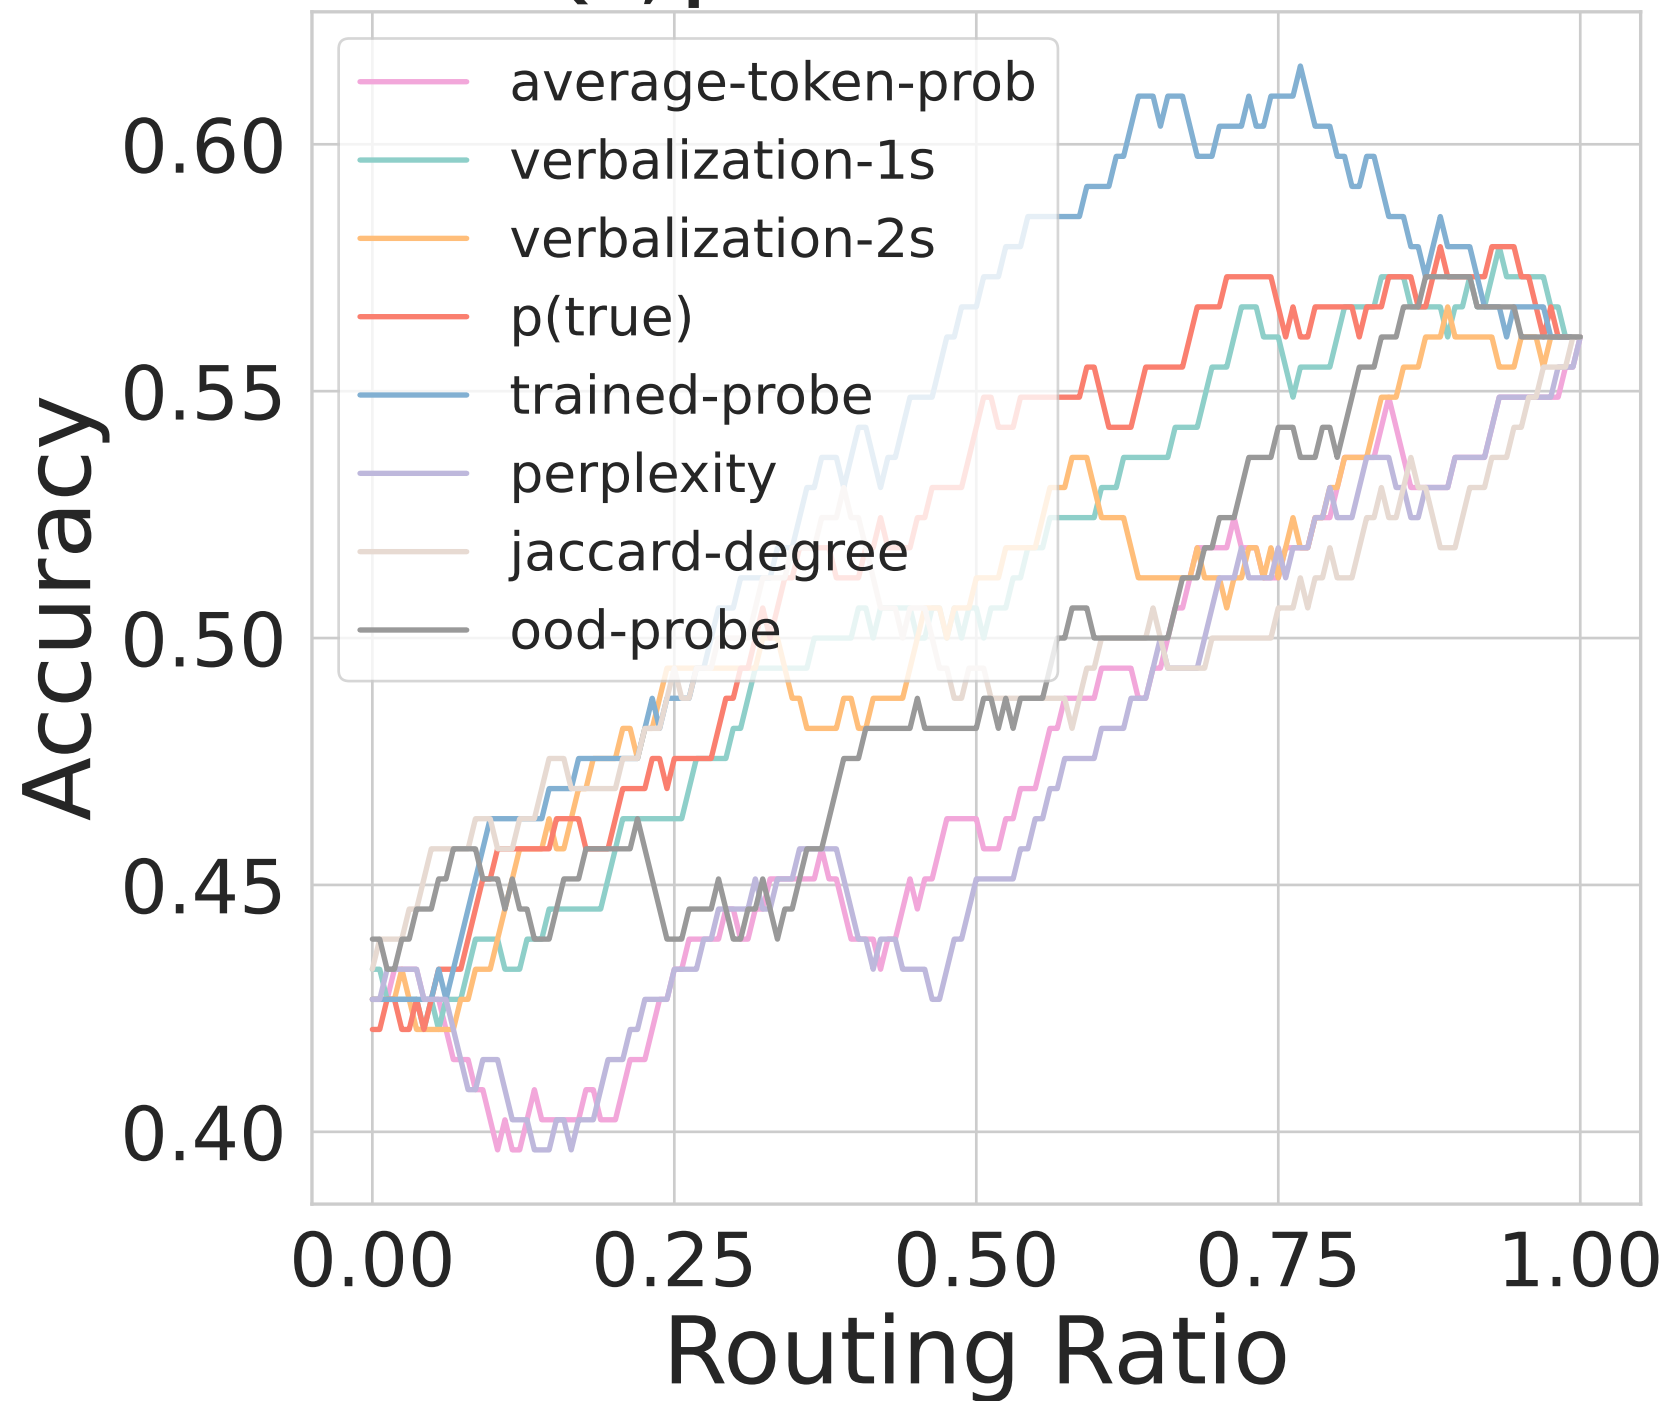

Supplement: supplementary_material [file rr_acc_truthful_qa_phi-3.5-mini_llama70.pdf › Routing_SLM_LLMs/Uncertainty-based Routing/w_legend/to_llama70/rr_acc_truthful_qa_phi-3.5-mini_llama70.pdf]

# TruthfulQA, phi-4-mini-reasoning to Llama-3.1-70B

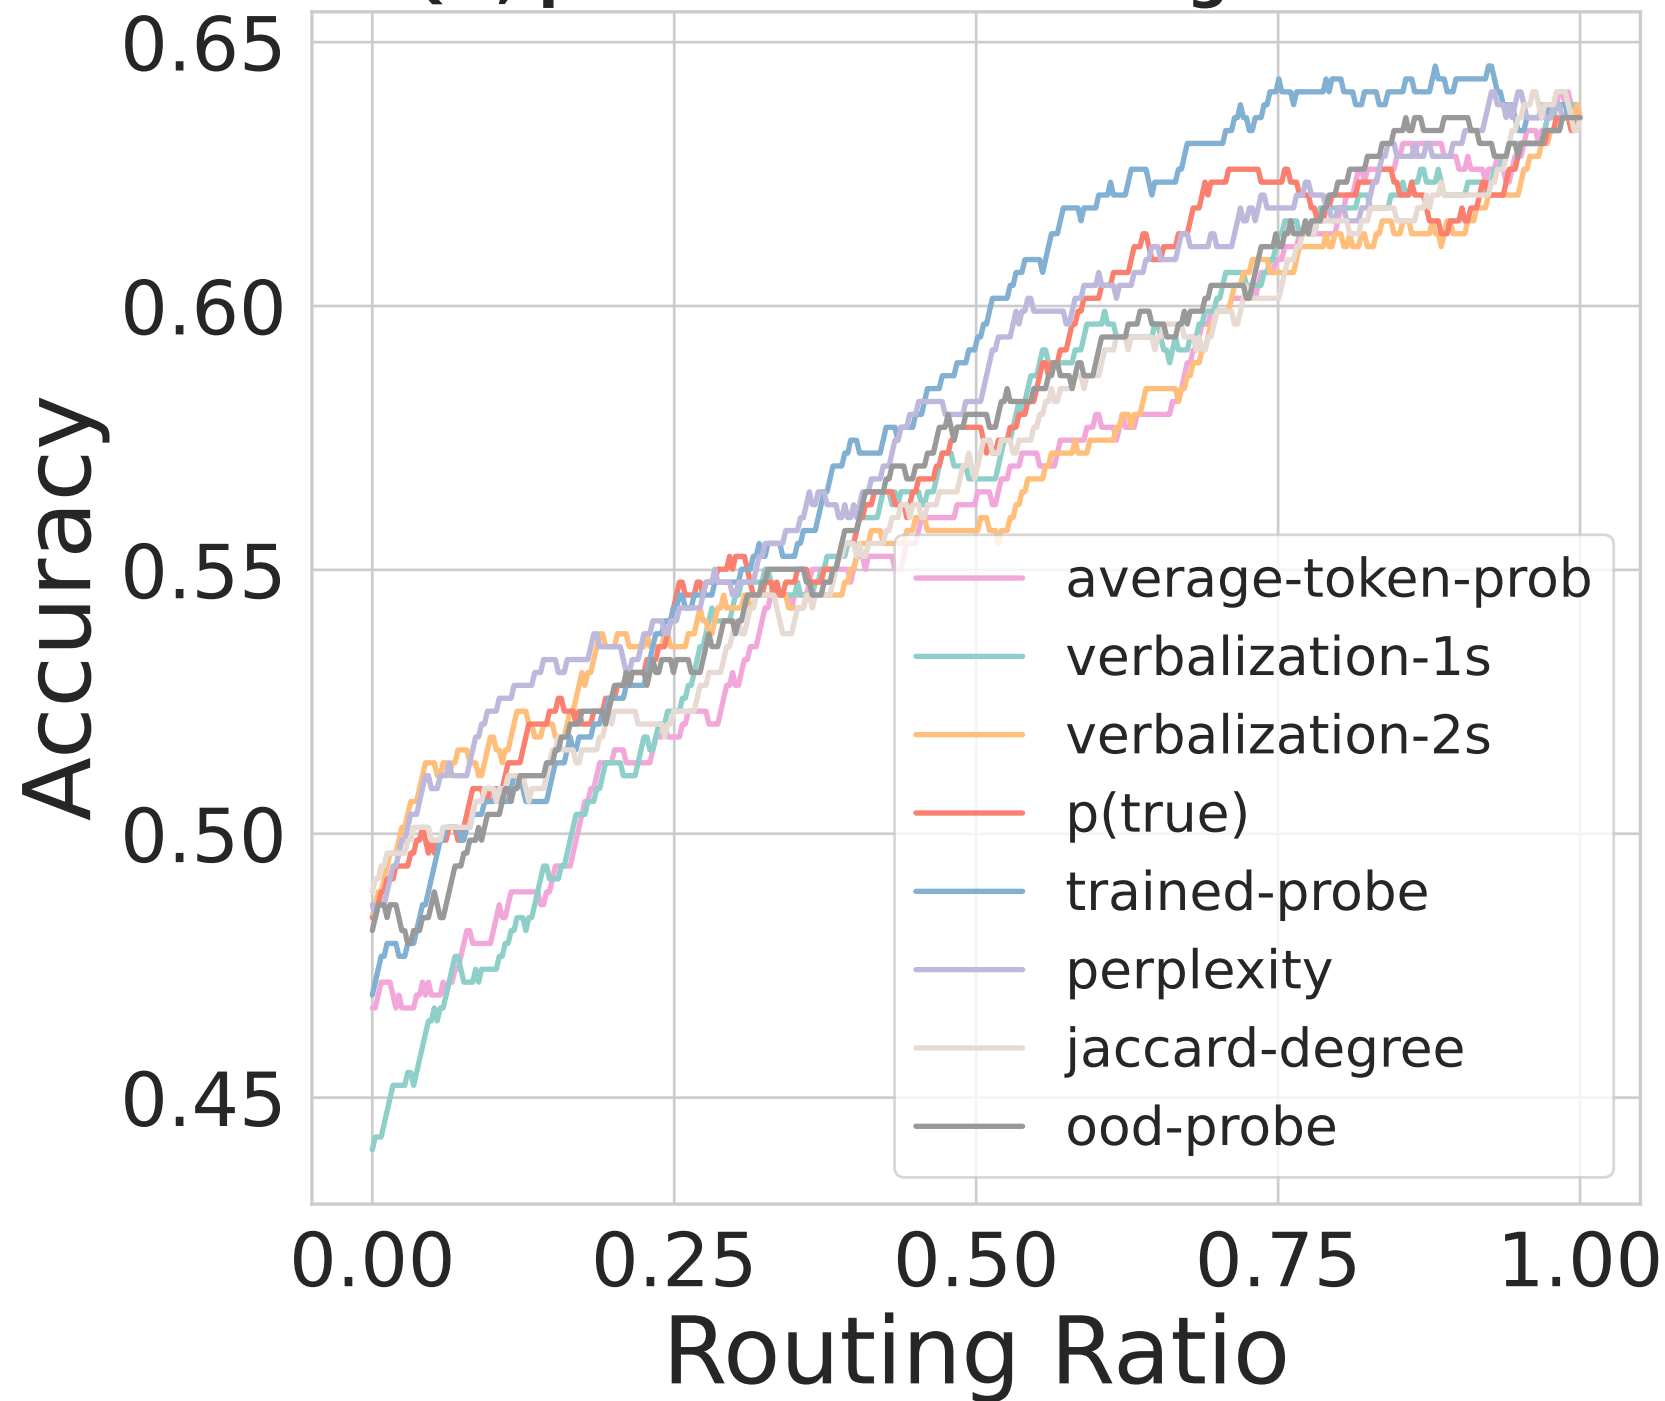

Supplement: supplementary_material [file rr_acc_truthful_qa_phi-4-mini-reasoning_llama70.pdf › Routing_SLM_LLMs/Uncertainty-based Routing/w_legend/to_llama70/rr_acc_truthful_qa_phi-4-mini-reasoning_llama70.pdf]

# TruthfulQA, qwen-2.5-7b to Llama-3.1-70B

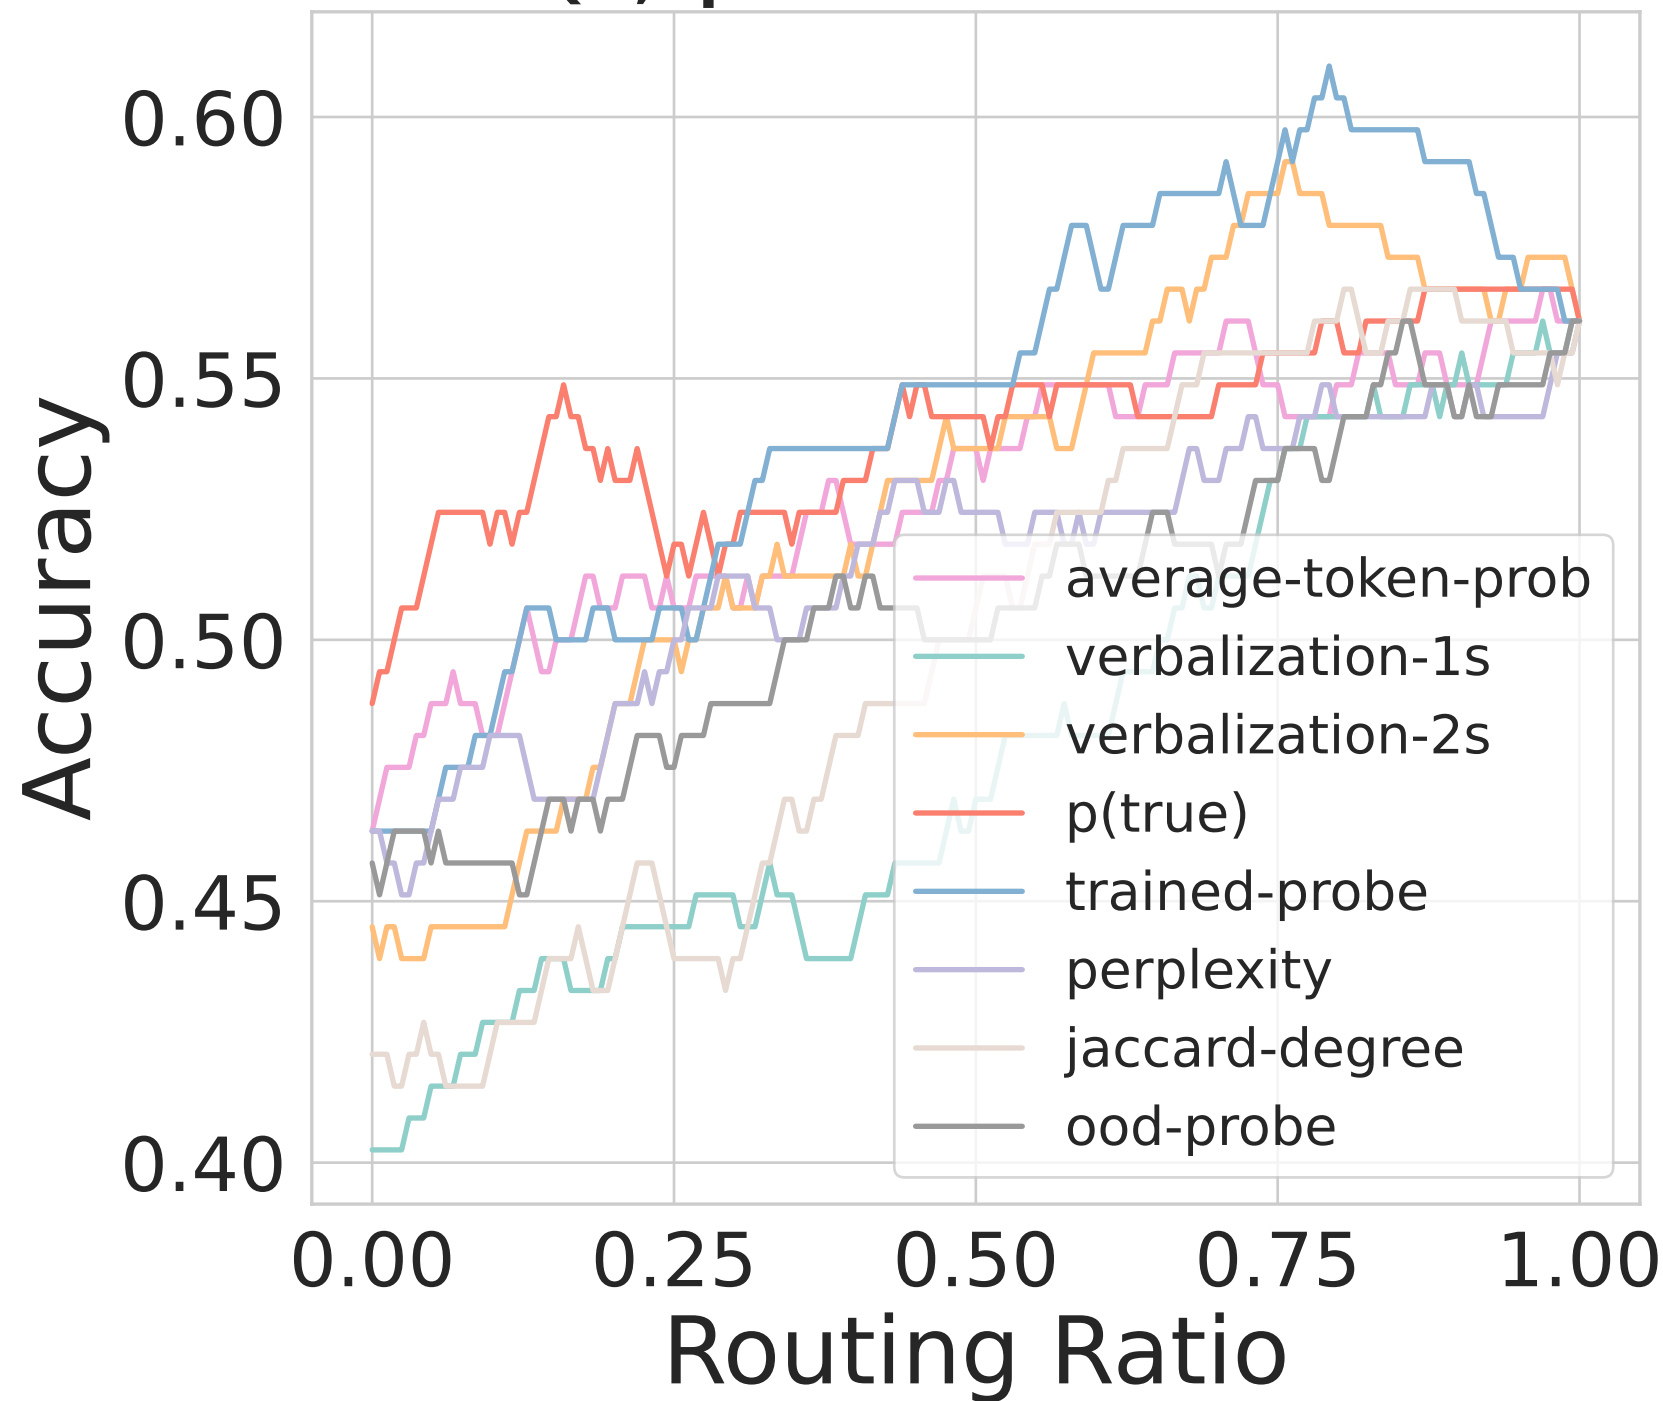

Supplement: supplementary_material [file rr_acc_truthful_qa_qwen-2.5-7b_llama70.pdf › Routing_SLM_LLMs/Uncertainty-based Routing/w_legend/to_llama70/rr_acc_truthful_qa_qwen-2.5-7b_llama70.pdf]

**TruthfulQA, rwkv to Llama-3.1-70B**

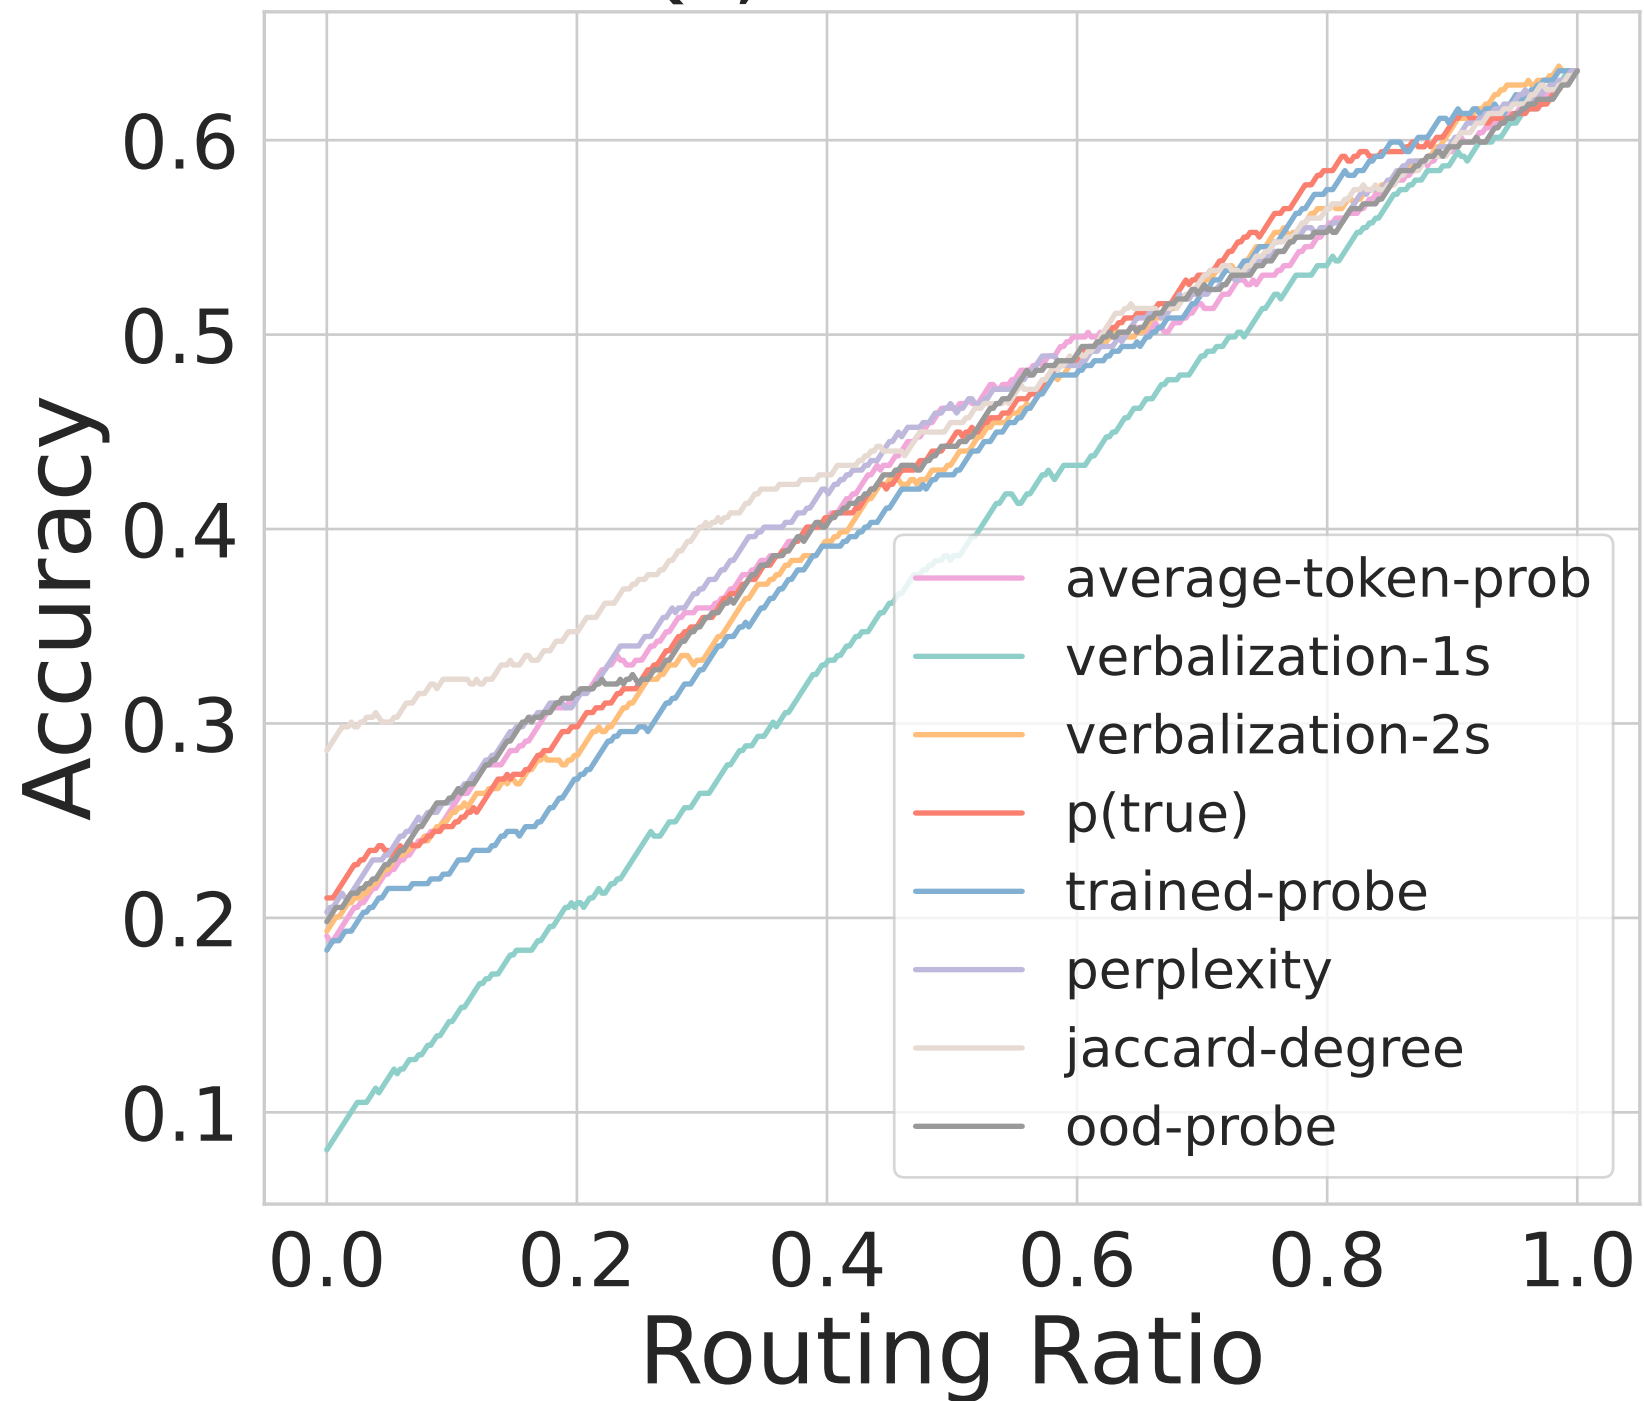

Supplement: supplementary_material [file rr_acc_truthful_qa_rwkv_llama70.pdf › Routing_SLM_LLMs/Uncertainty-based Routing/w_legend/to_llama70/rr_acc_truthful_qa_rwkv_llama70.pdf]

# WinoGrande, Qwen3-1.7B to Llama-3.1-70B

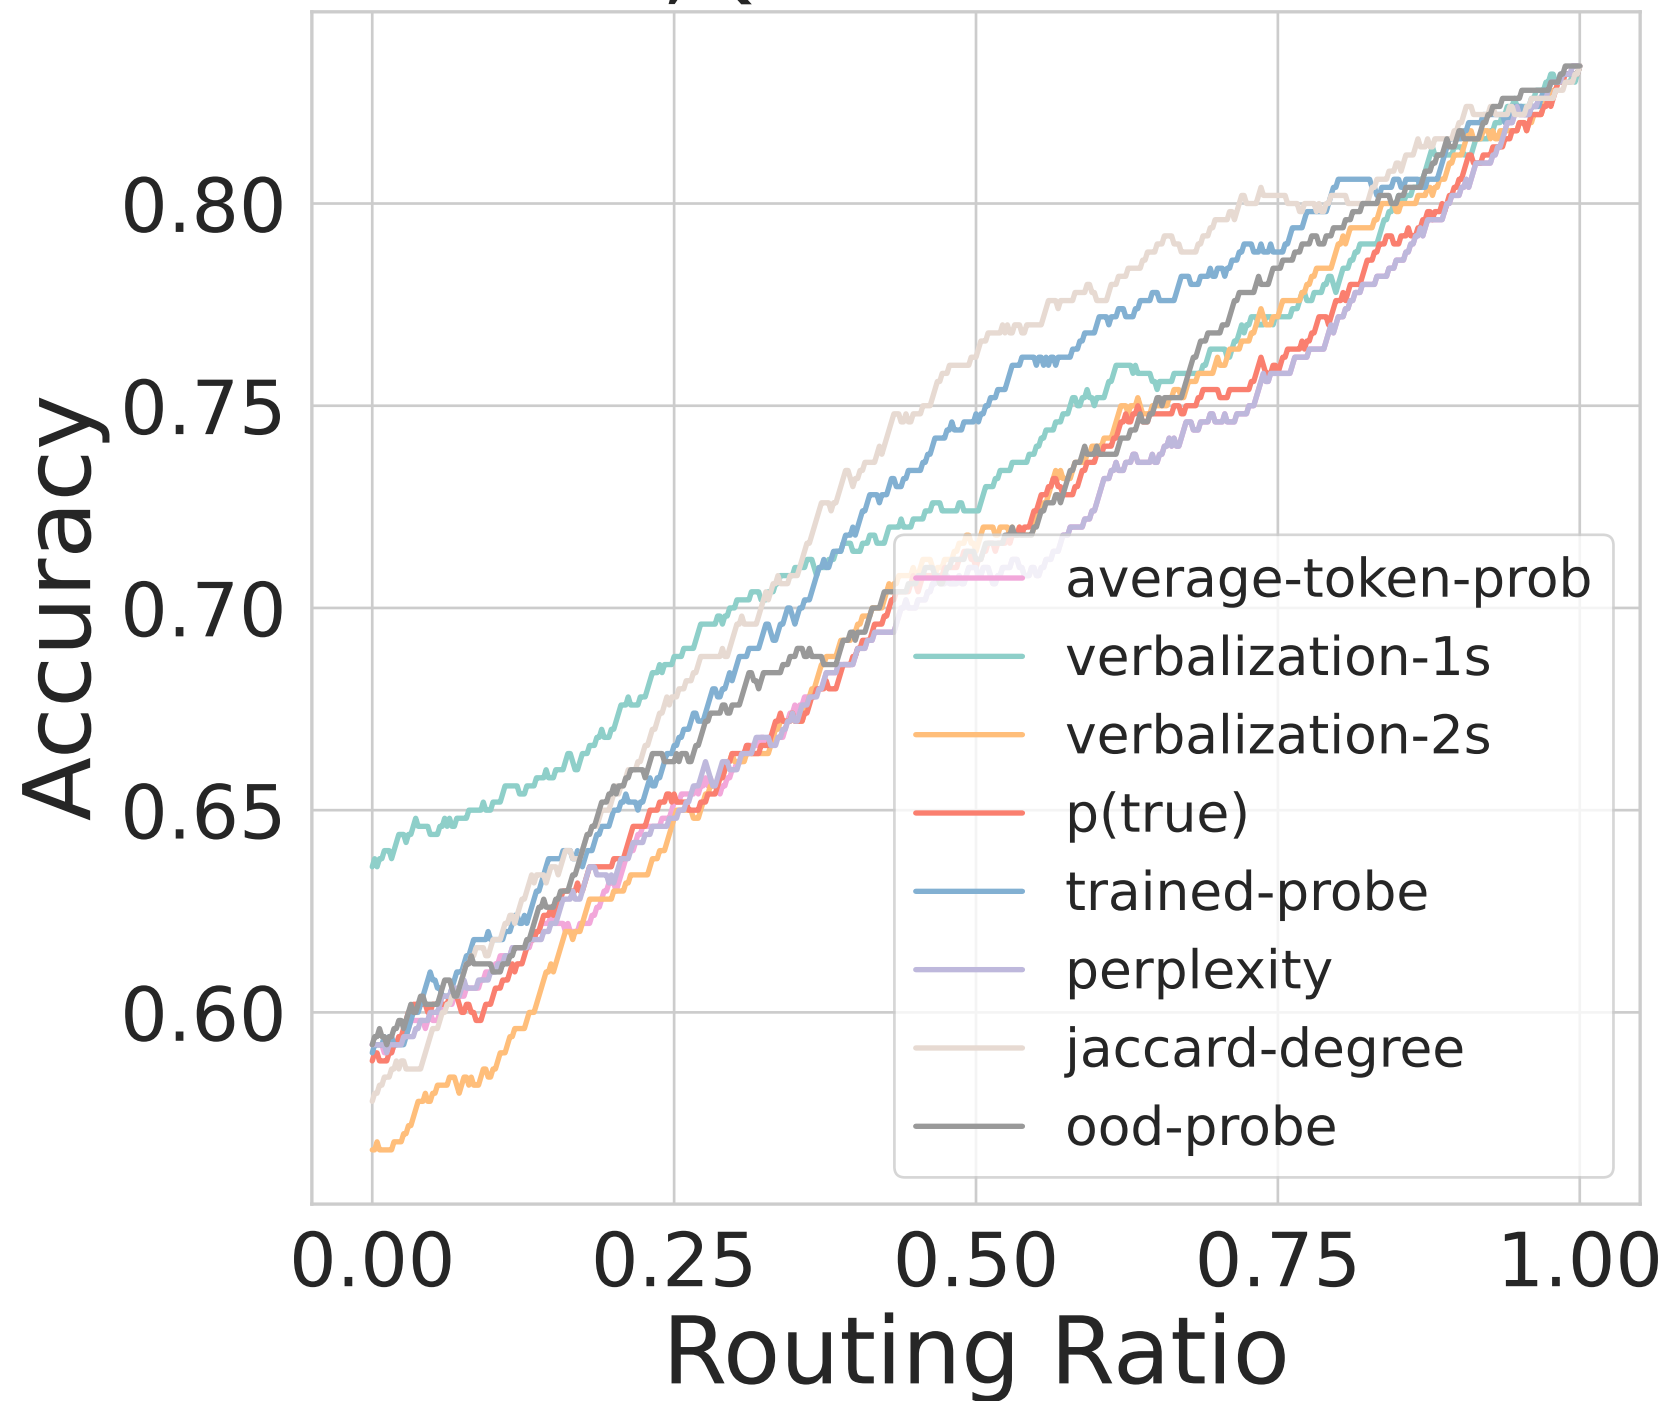

Supplement: supplementary_material [file rr_acc_winogrande_Qwen3-1.7B_llama70.pdf › Routing_SLM_LLMs/Uncertainty-based Routing/w_legend/to_llama70/rr_acc_winogrande_Qwen3-1.7B_llama70.pdf]

# WinoGrande, granite-3.1-8b to Llama-3.1-70B

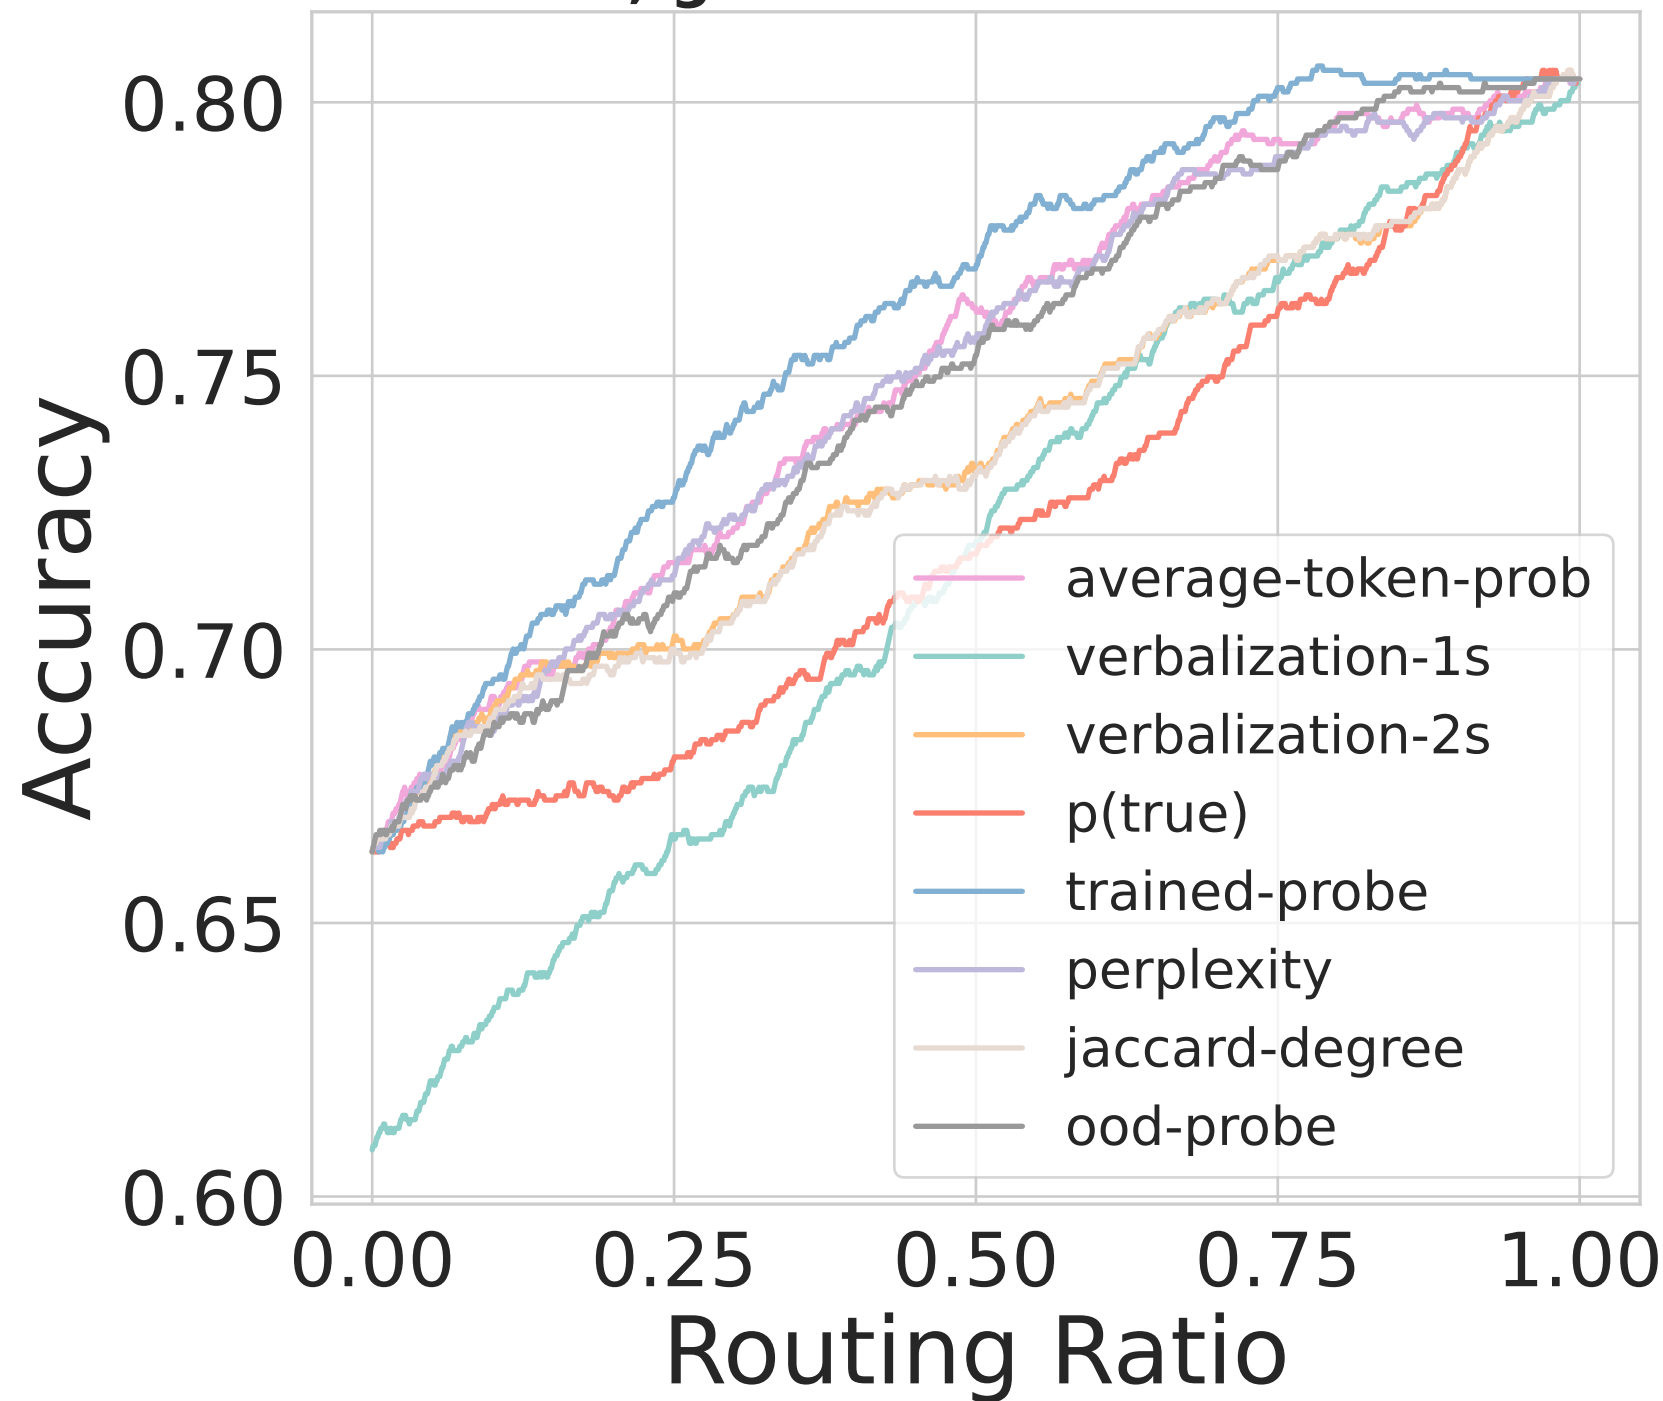

Supplement: supplementary_material [file rr_acc_winogrande_granite-3.1-8b_llama70.pdf › Routing_SLM_LLMs/Uncertainty-based Routing/w_legend/to_llama70/rr_acc_winogrande_granite-3.1-8b_llama70.pdf]

# WinoGrande, llama-3.2-1b to Llama-3.1-70B

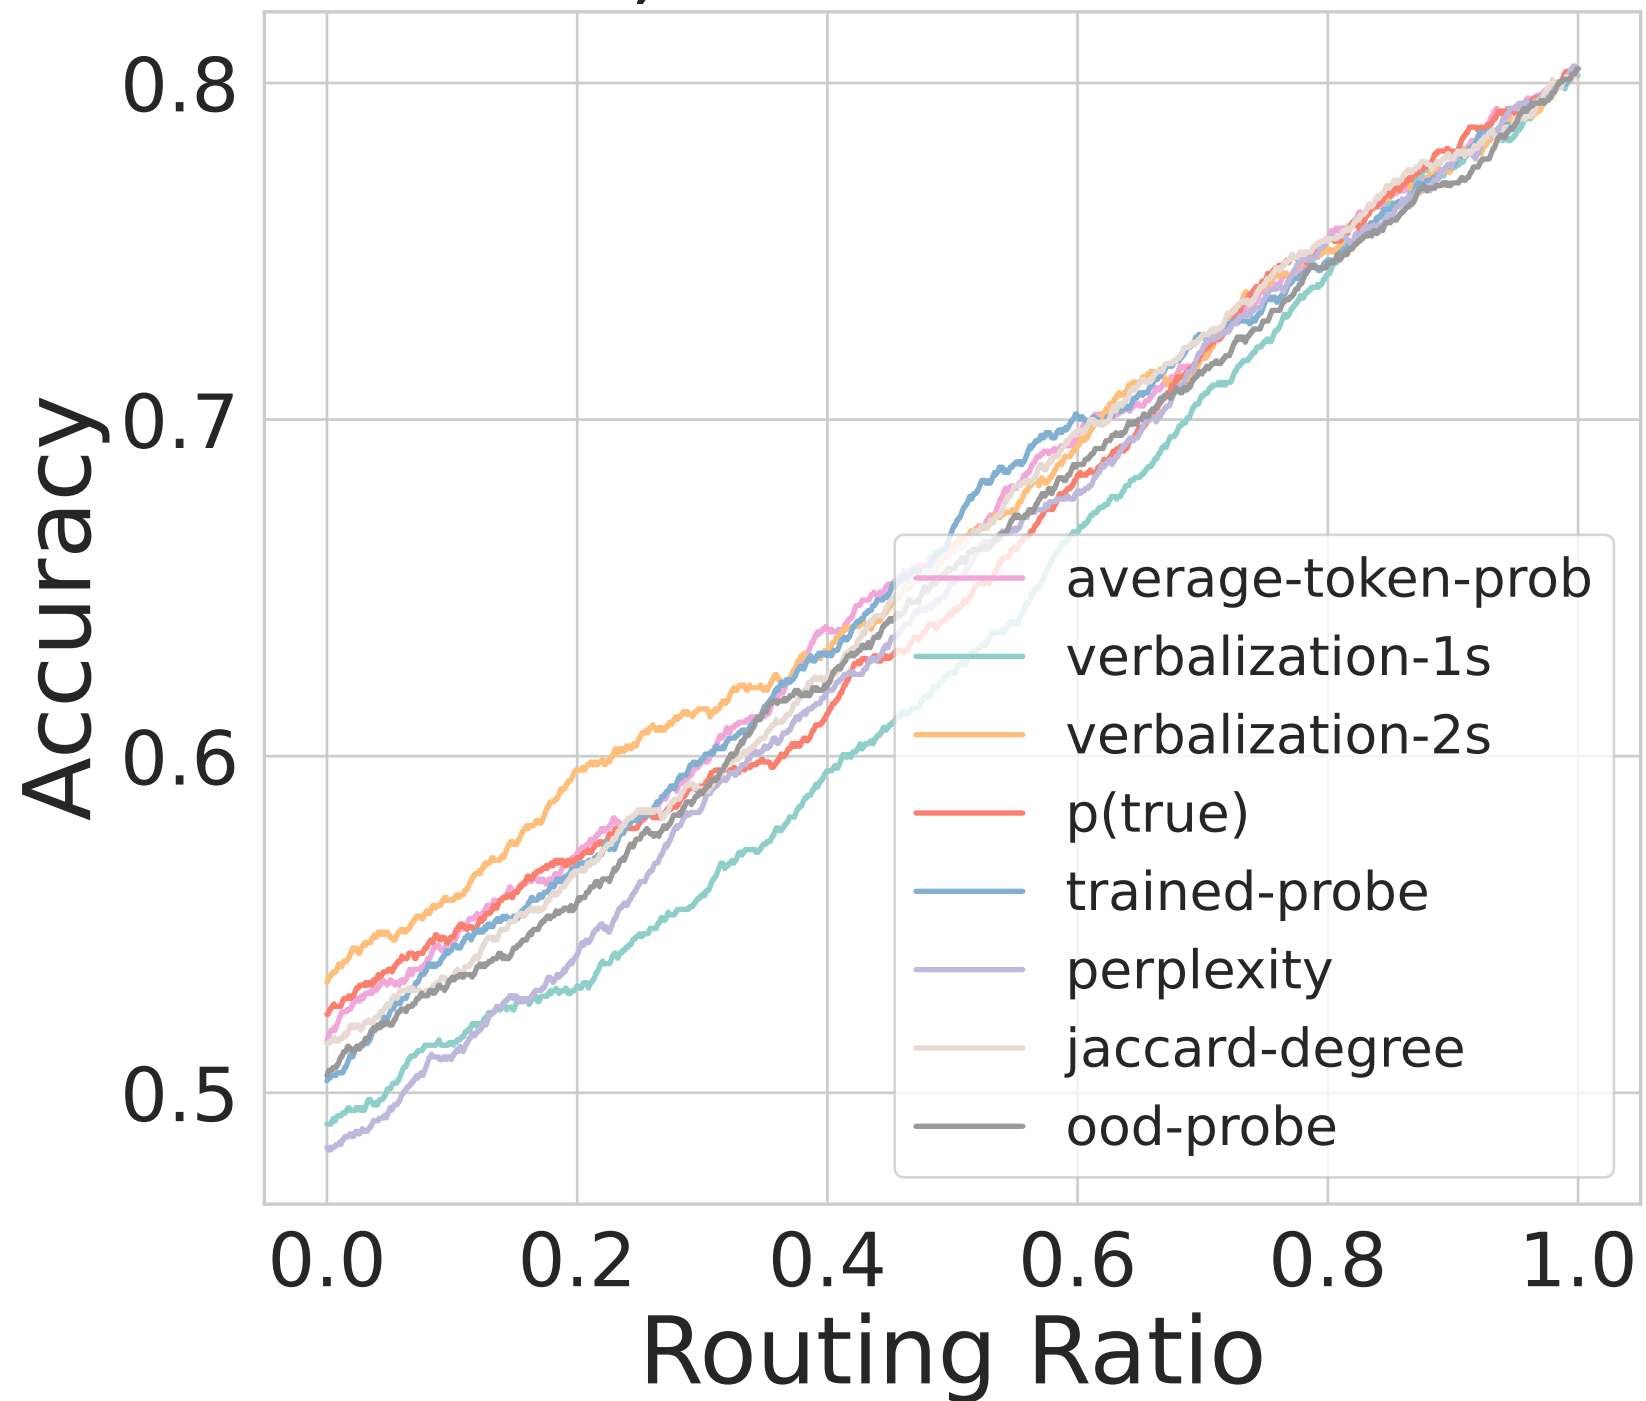

Supplement: supplementary_material [file rr_acc_winogrande_llama-3.2-1b_llama70.pdf › Routing_SLM_LLMs/Uncertainty-based Routing/w_legend/to_llama70/rr_acc_winogrande_llama-3.2-1b_llama70.pdf]

# WinoGrande, llama-3.2-3b to Llama-3.1-70B

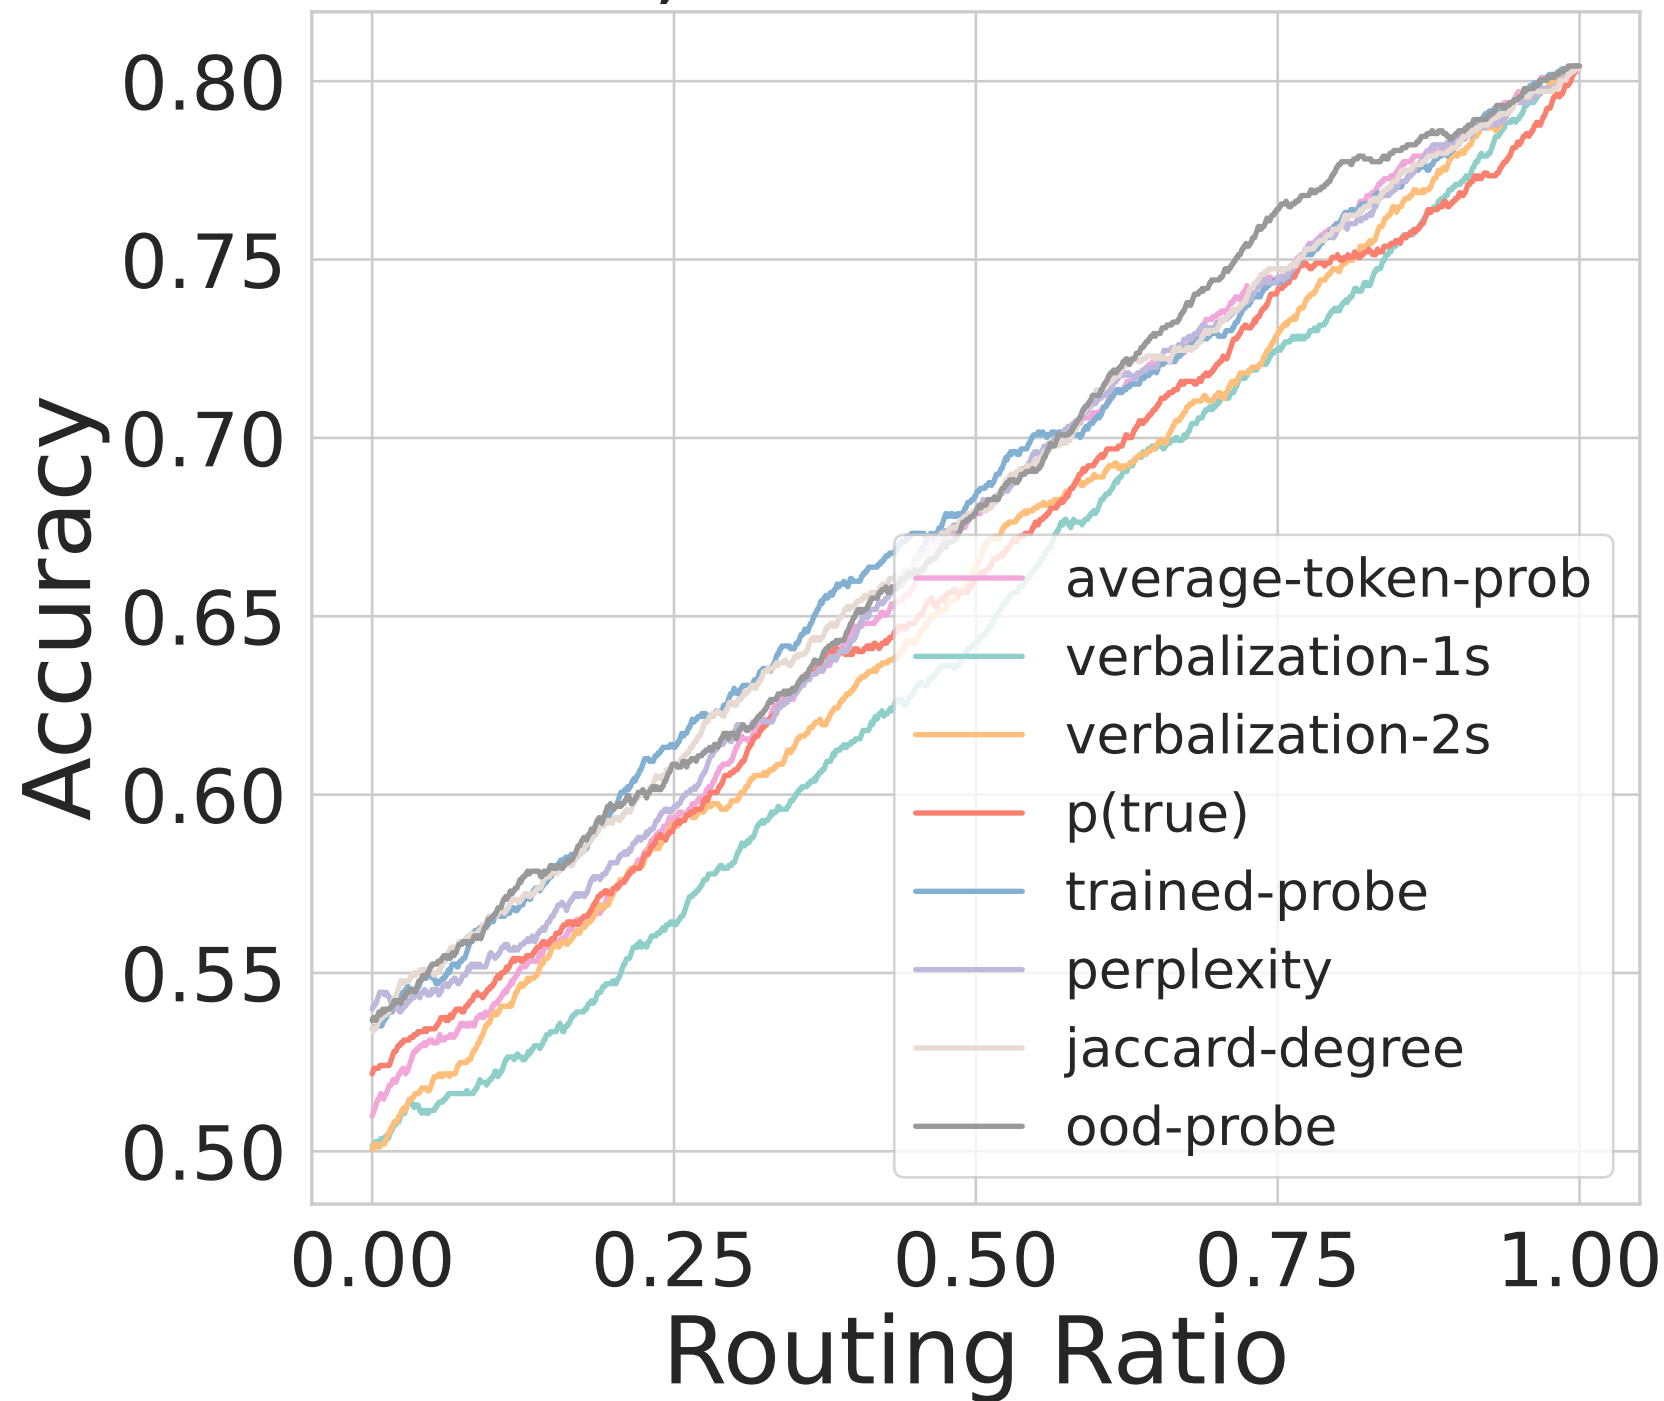

Supplement: supplementary_material [file rr_acc_winogrande_llama-3.2-3b_llama70.pdf › Routing_SLM_LLMs/Uncertainty-based Routing/w_legend/to_llama70/rr_acc_winogrande_llama-3.2-3b_llama70.pdf]

# WinoGrande, mistral-7b to Llama-3.1-70B

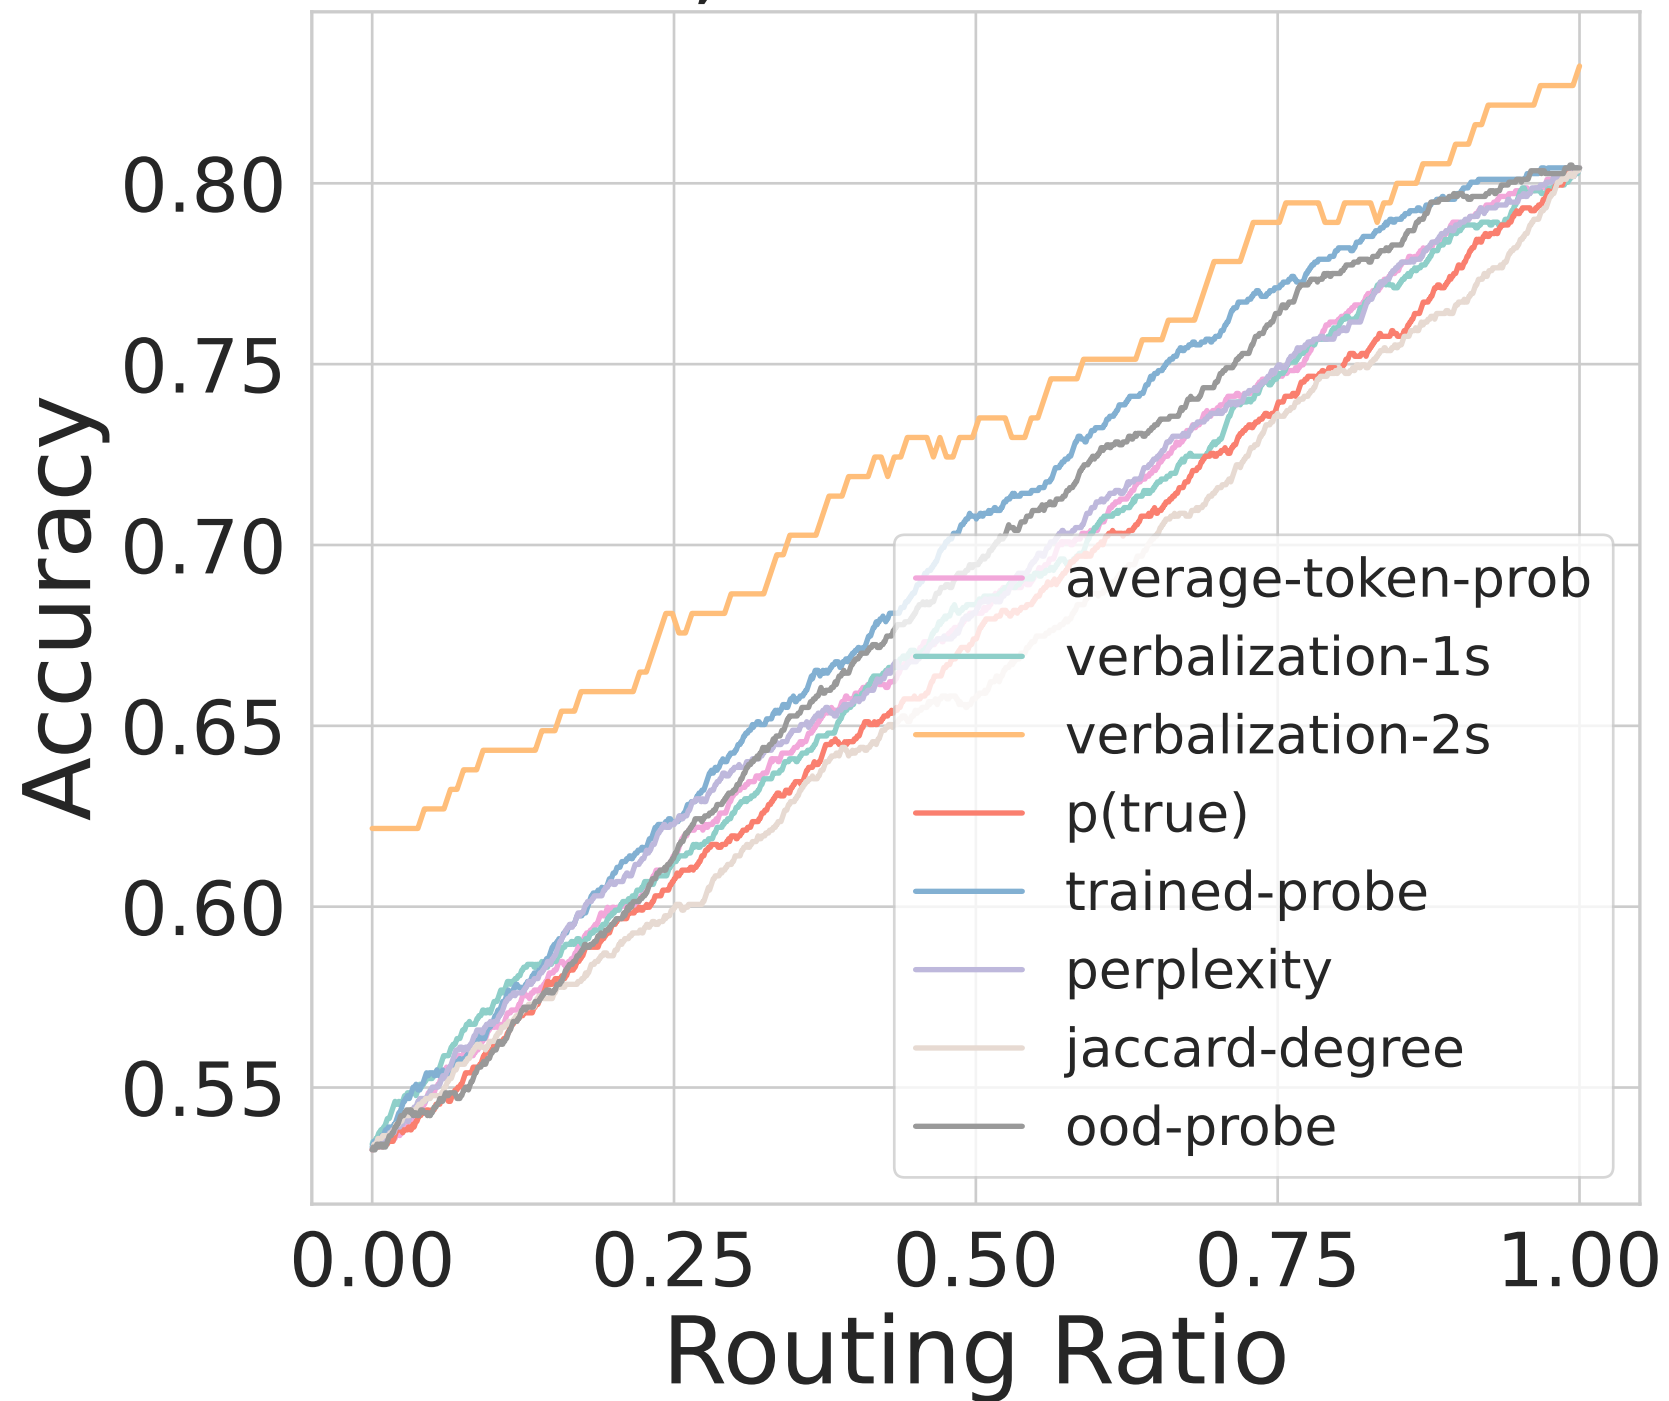

Supplement: supplementary_material [file rr_acc_winogrande_mistral-7b_llama70.pdf › Routing_SLM_LLMs/Uncertainty-based Routing/w_legend/to_llama70/rr_acc_winogrande_mistral-7b_llama70.pdf]

# WinoGrande, phi-4-mini-reasoning to Llama-3.1-70B

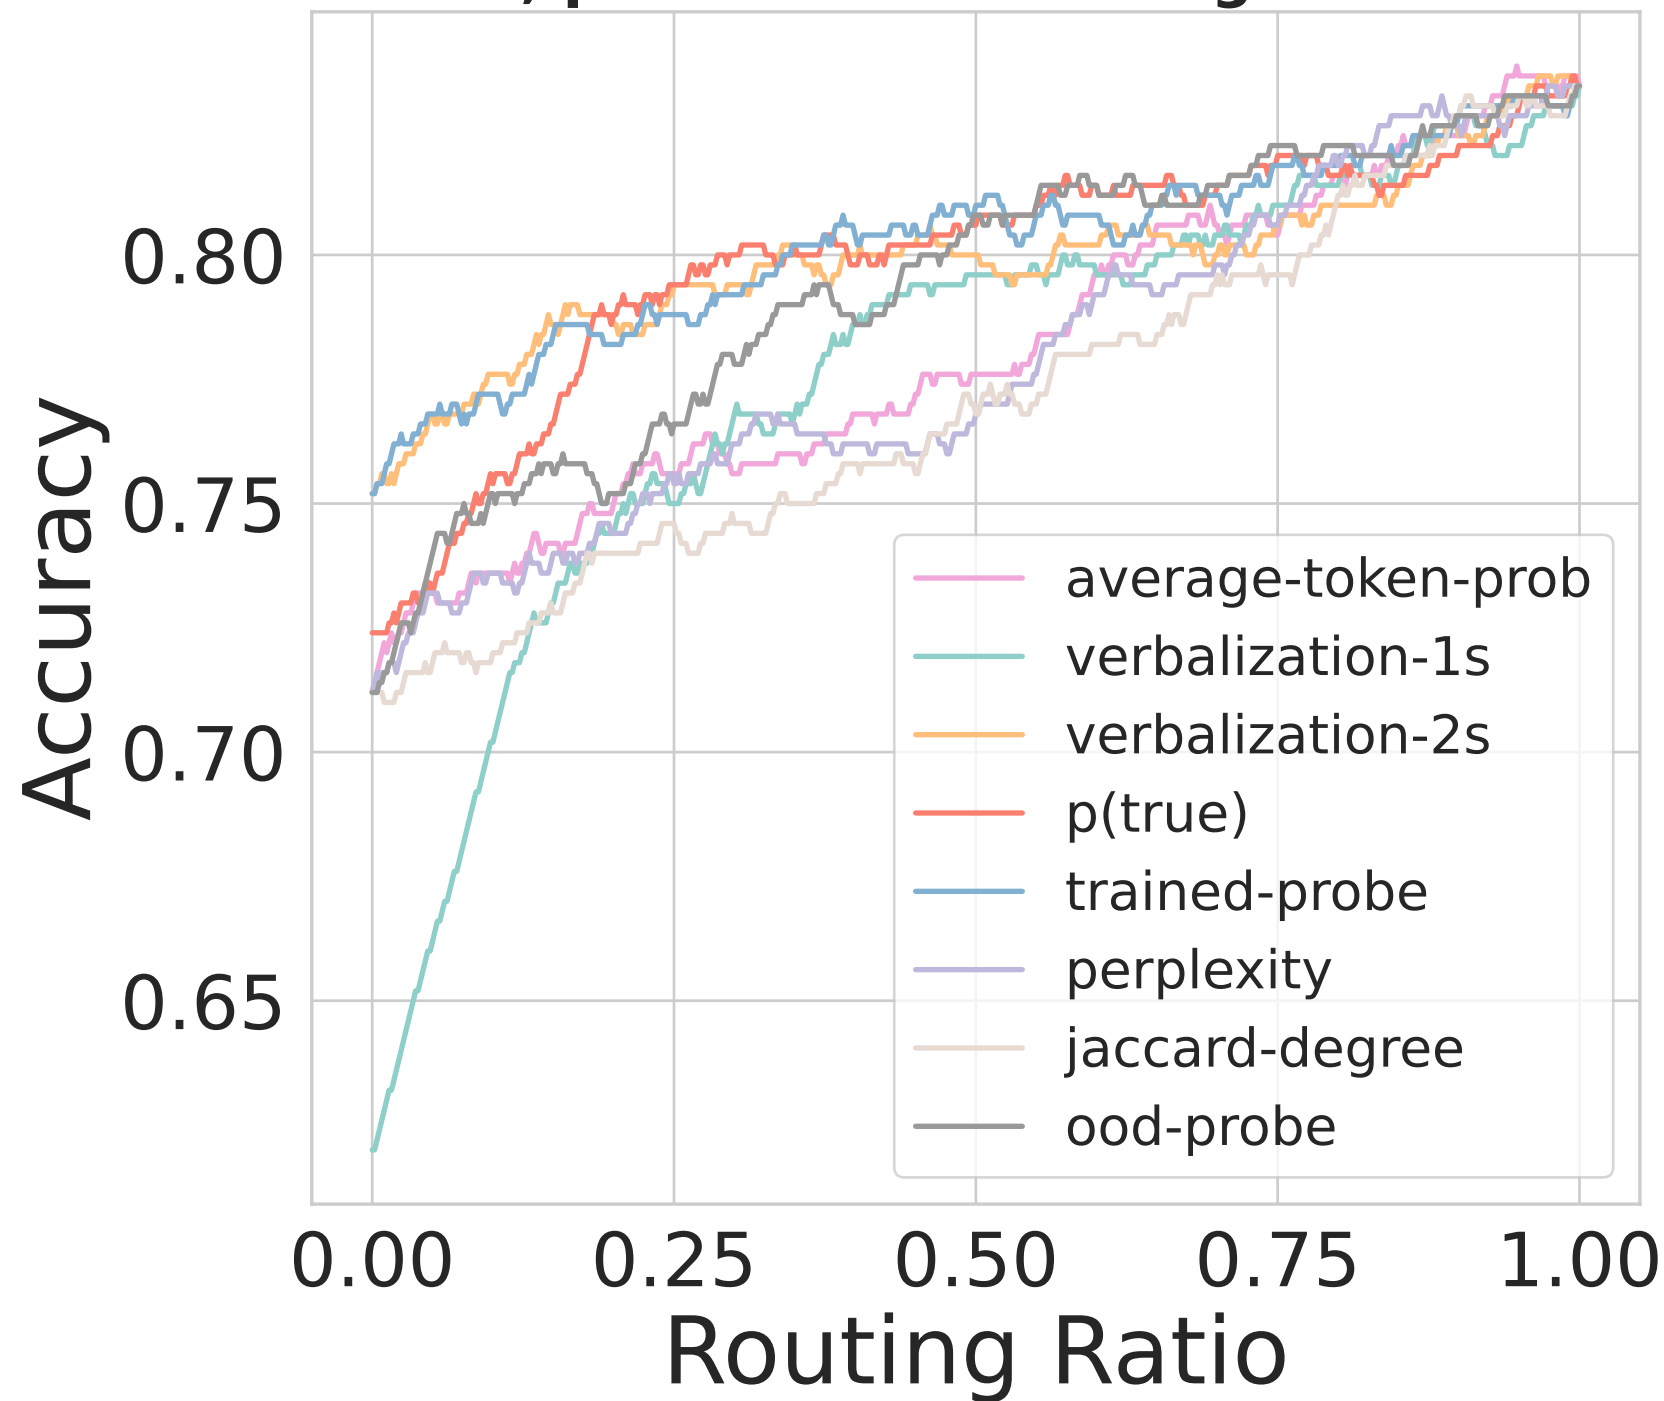

Supplement: supplementary_material [file rr_acc_winogrande_phi-4-mini-reasoning_llama70.pdf › Routing_SLM_LLMs/Uncertainty-based Routing/w_legend/to_llama70/rr_acc_winogrande_phi-4-mini-reasoning_llama70.pdf]

# WinoGrande, qwen-2.5-7b to Llama-3.1-70B

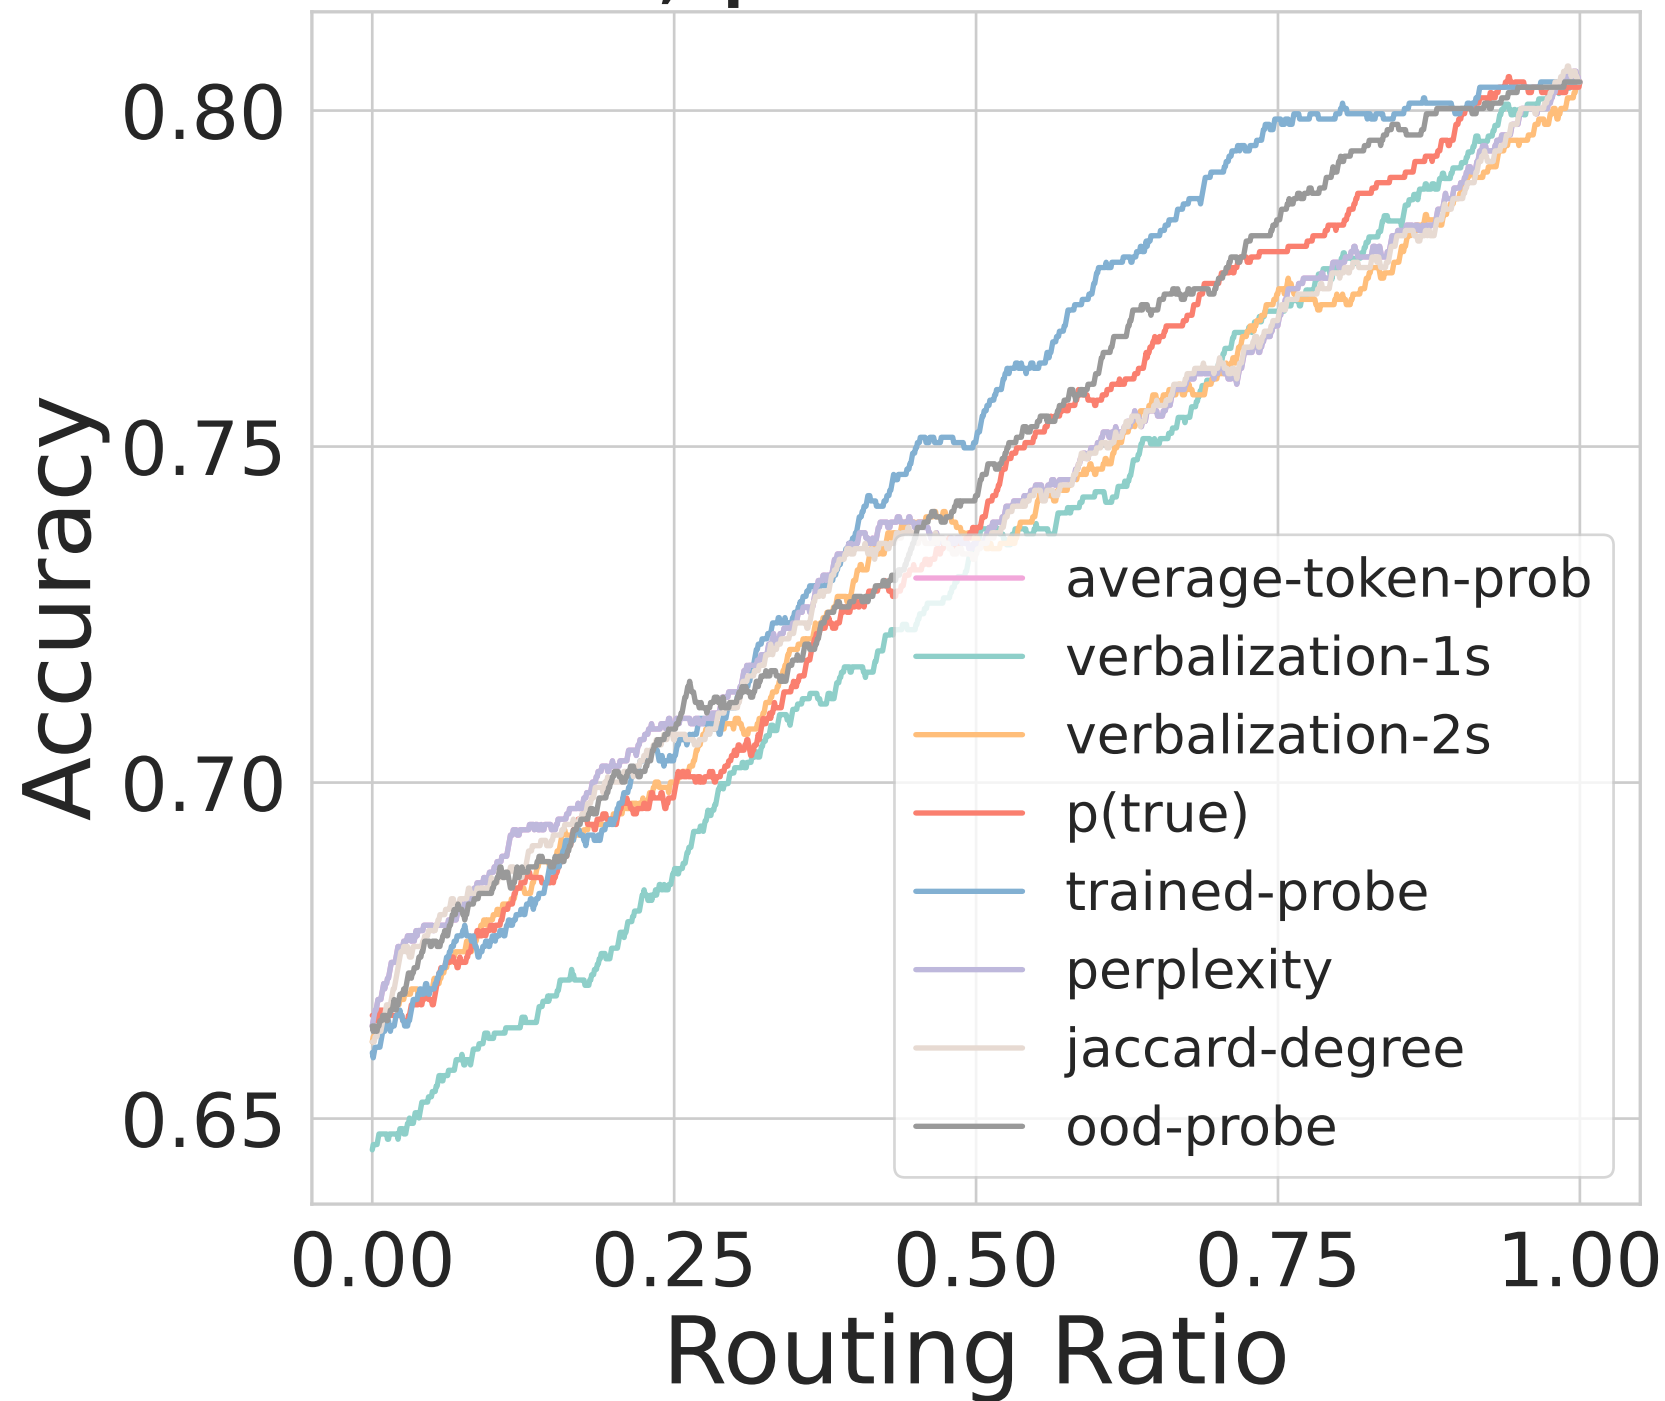

Supplement: supplementary_material [file rr_acc_winogrande_qwen-2.5-7b_llama70.pdf › Routing_SLM_LLMs/Uncertainty-based Routing/w_legend/to_llama70/rr_acc_winogrande_qwen-2.5-7b_llama70.pdf]

## AQuA, Qwen3-0.6B to Qwen3-32B

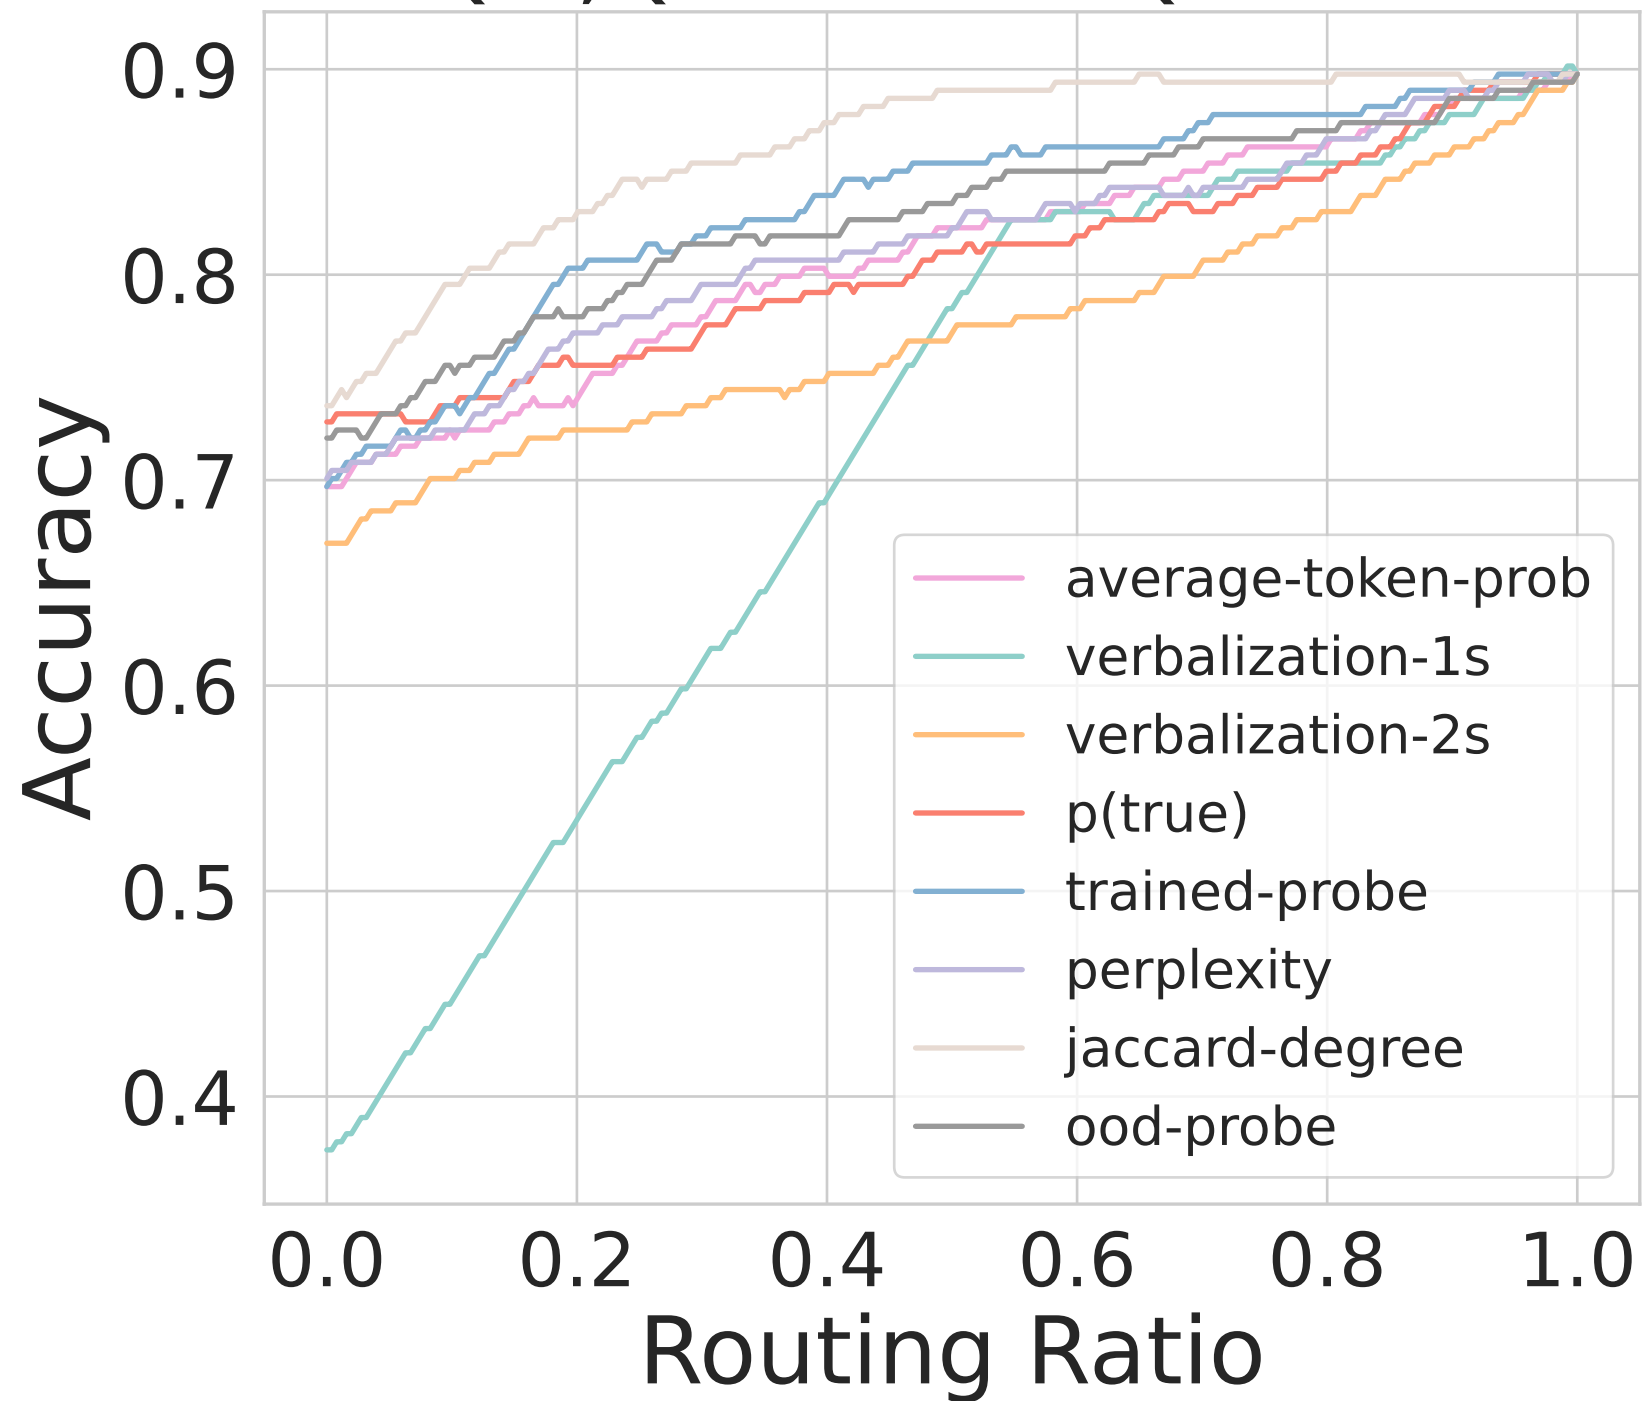

Supplement: supplementary_material [file rr_acc_aqua_Qwen3-0.6B_qwen32.pdf › Routing_SLM_LLMs/Uncertainty-based Routing/w_legend/to_qwen32/rr_acc_aqua_Qwen3-0.6B_qwen32.pdf]

**AQuA, Qwen3-1.7B to Qwen3-32B**

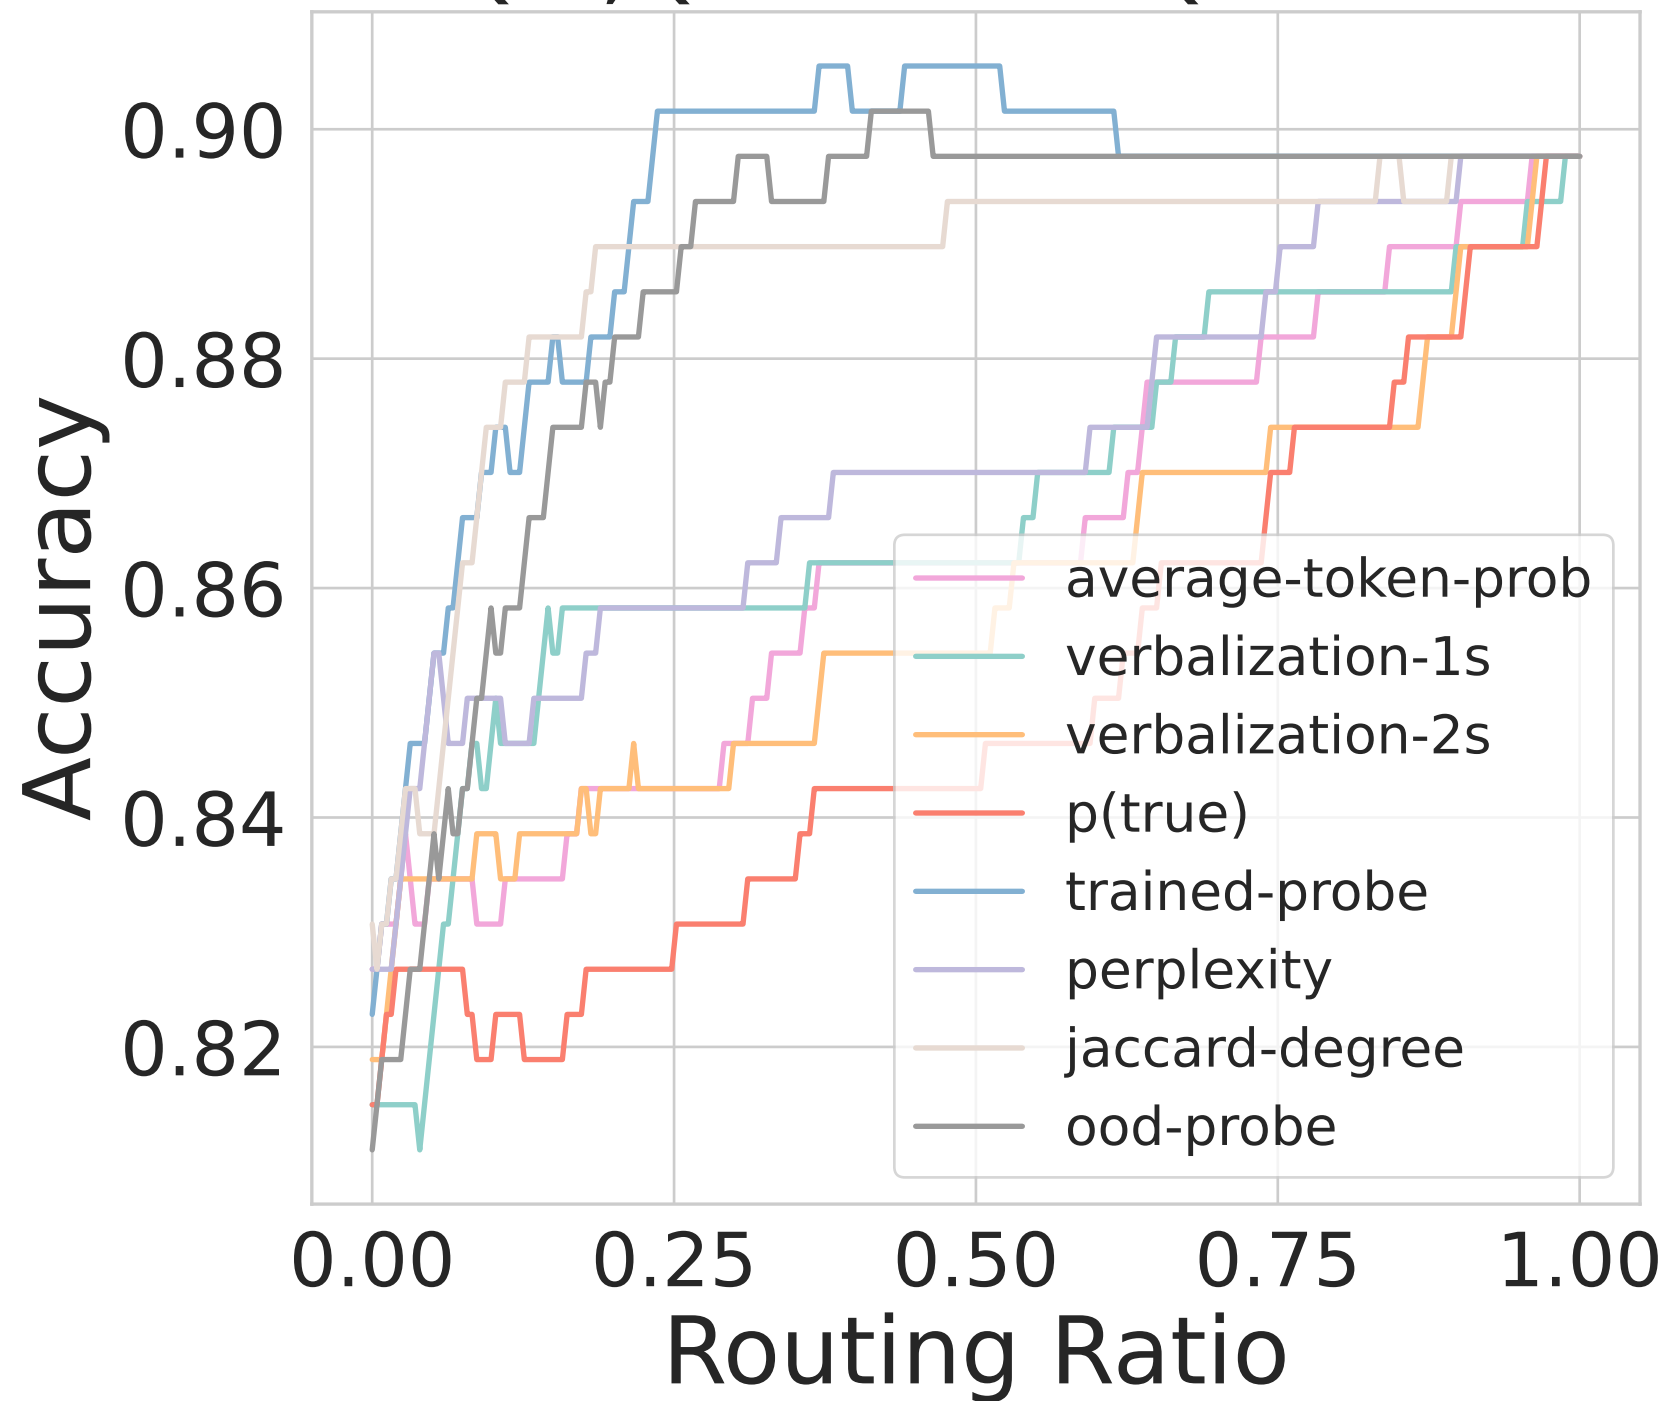

Supplement: supplementary_material [file rr_acc_aqua_Qwen3-1.7B_qwen32.pdf › Routing_SLM_LLMs/Uncertainty-based Routing/w_legend/to_qwen32/rr_acc_aqua_Qwen3-1.7B_qwen32.pdf]

**AQuA, Qwen3-4B to Qwen3-32B**

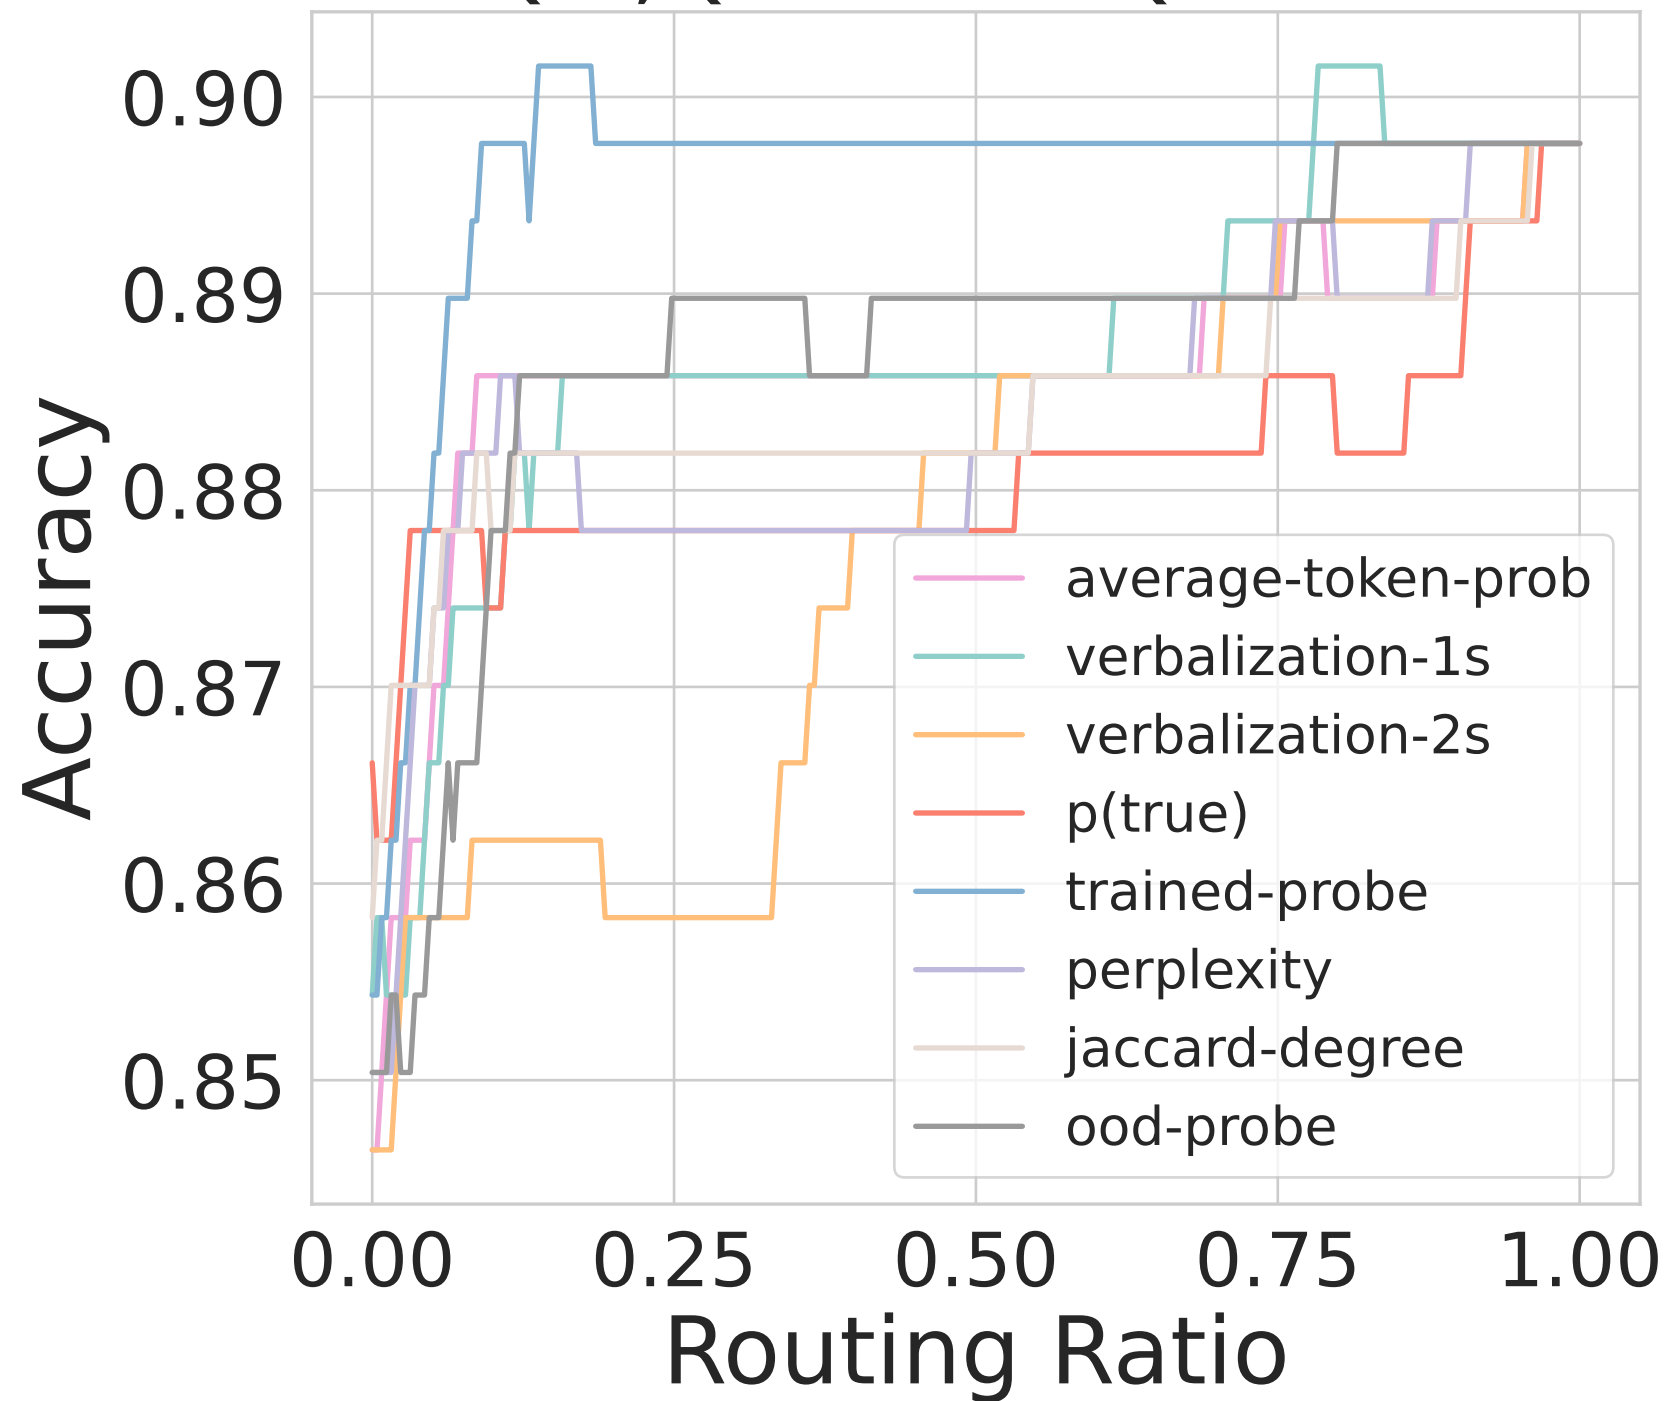

Supplement: supplementary_material [file rr_acc_aqua_Qwen3-4B_qwen32.pdf › Routing_SLM_LLMs/Uncertainty-based Routing/w_legend/to_qwen32/rr_acc_aqua_Qwen3-4B_qwen32.pdf]

**AQuA, granite-3.1-8b to Qwen3-32B**

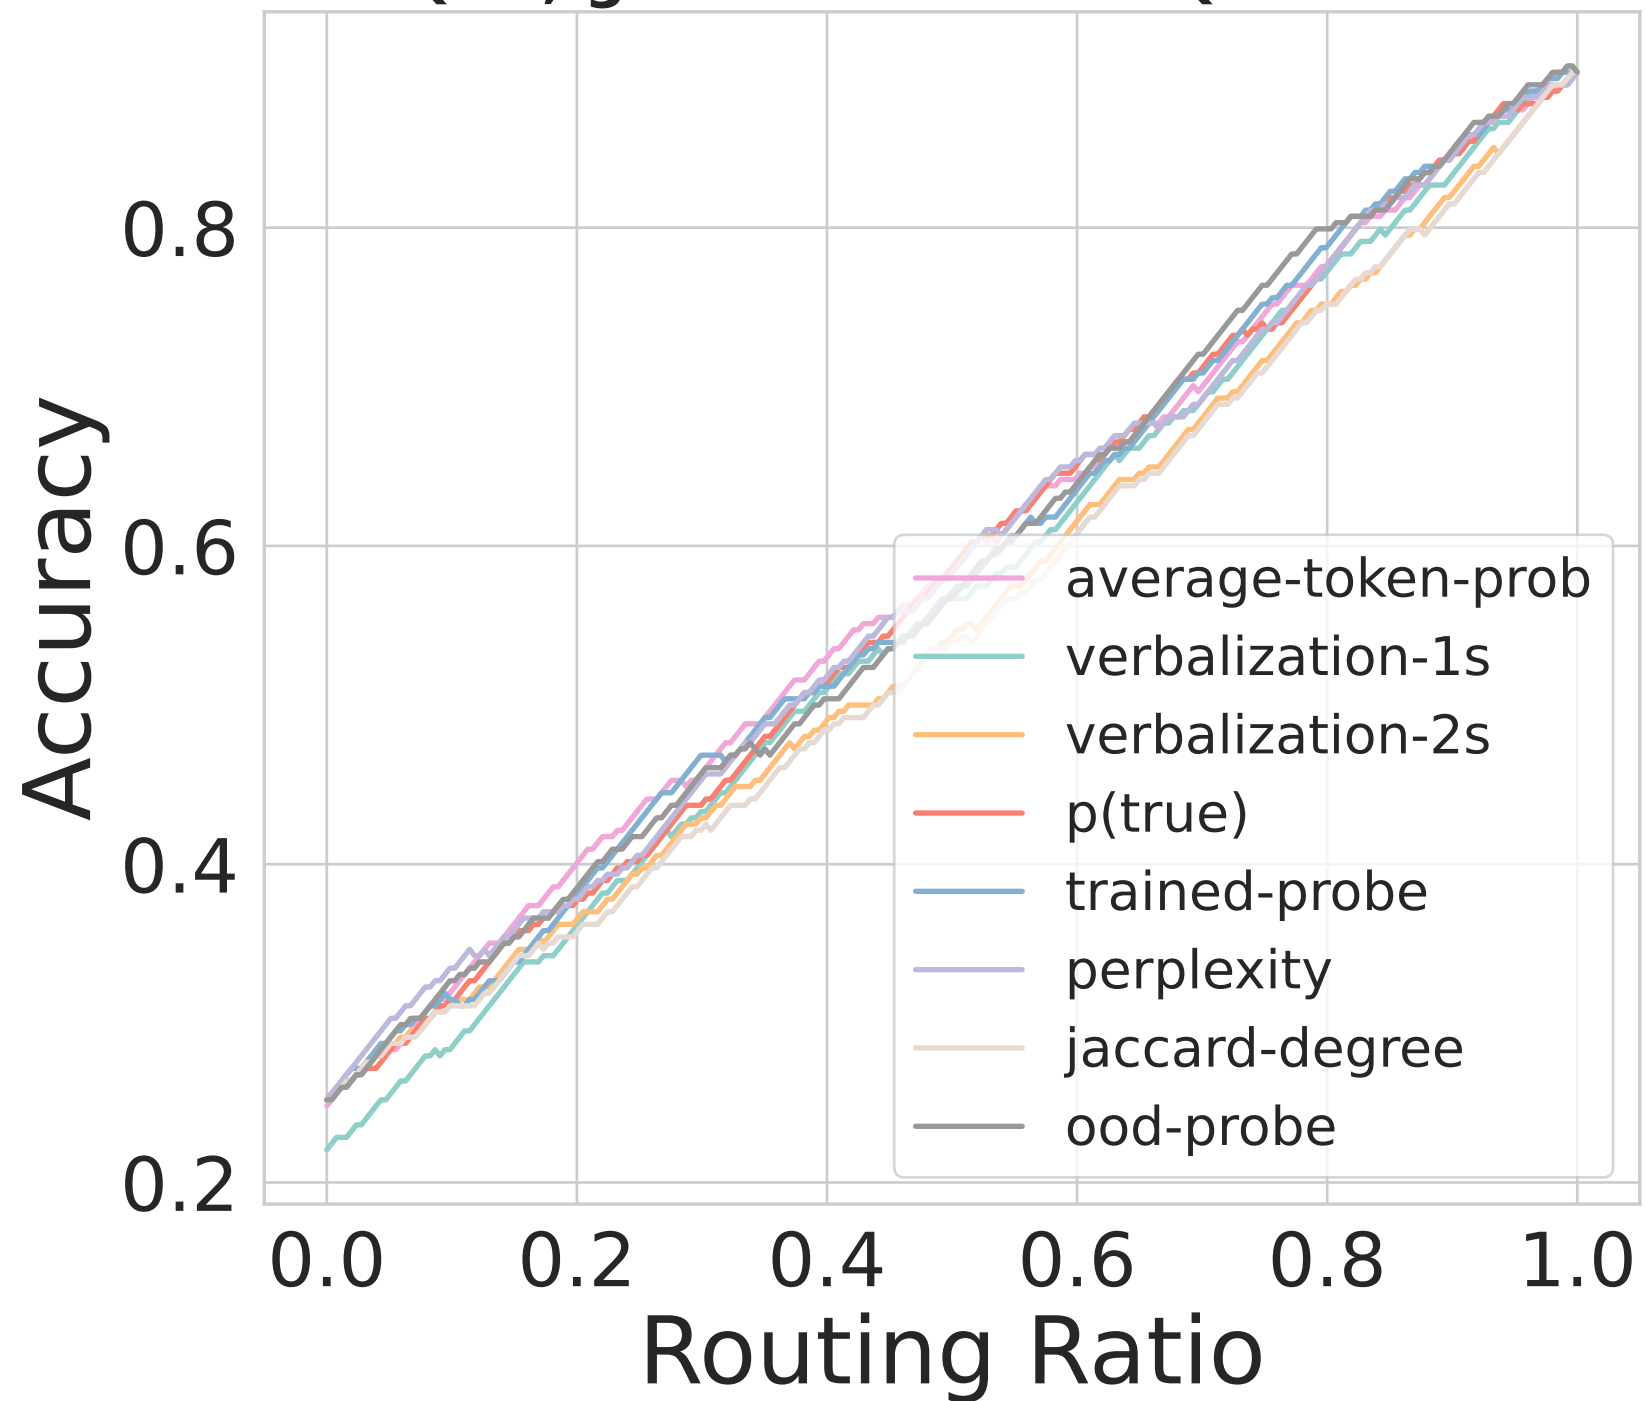

Supplement: supplementary_material [file rr_acc_aqua_granite-3.1-8b_qwen32.pdf › Routing_SLM_LLMs/Uncertainty-based Routing/w_legend/to_qwen32/rr_acc_aqua_granite-3.1-8b_qwen32.pdf]

# AQuA, llama-3.1-8b to Qwen3-32B

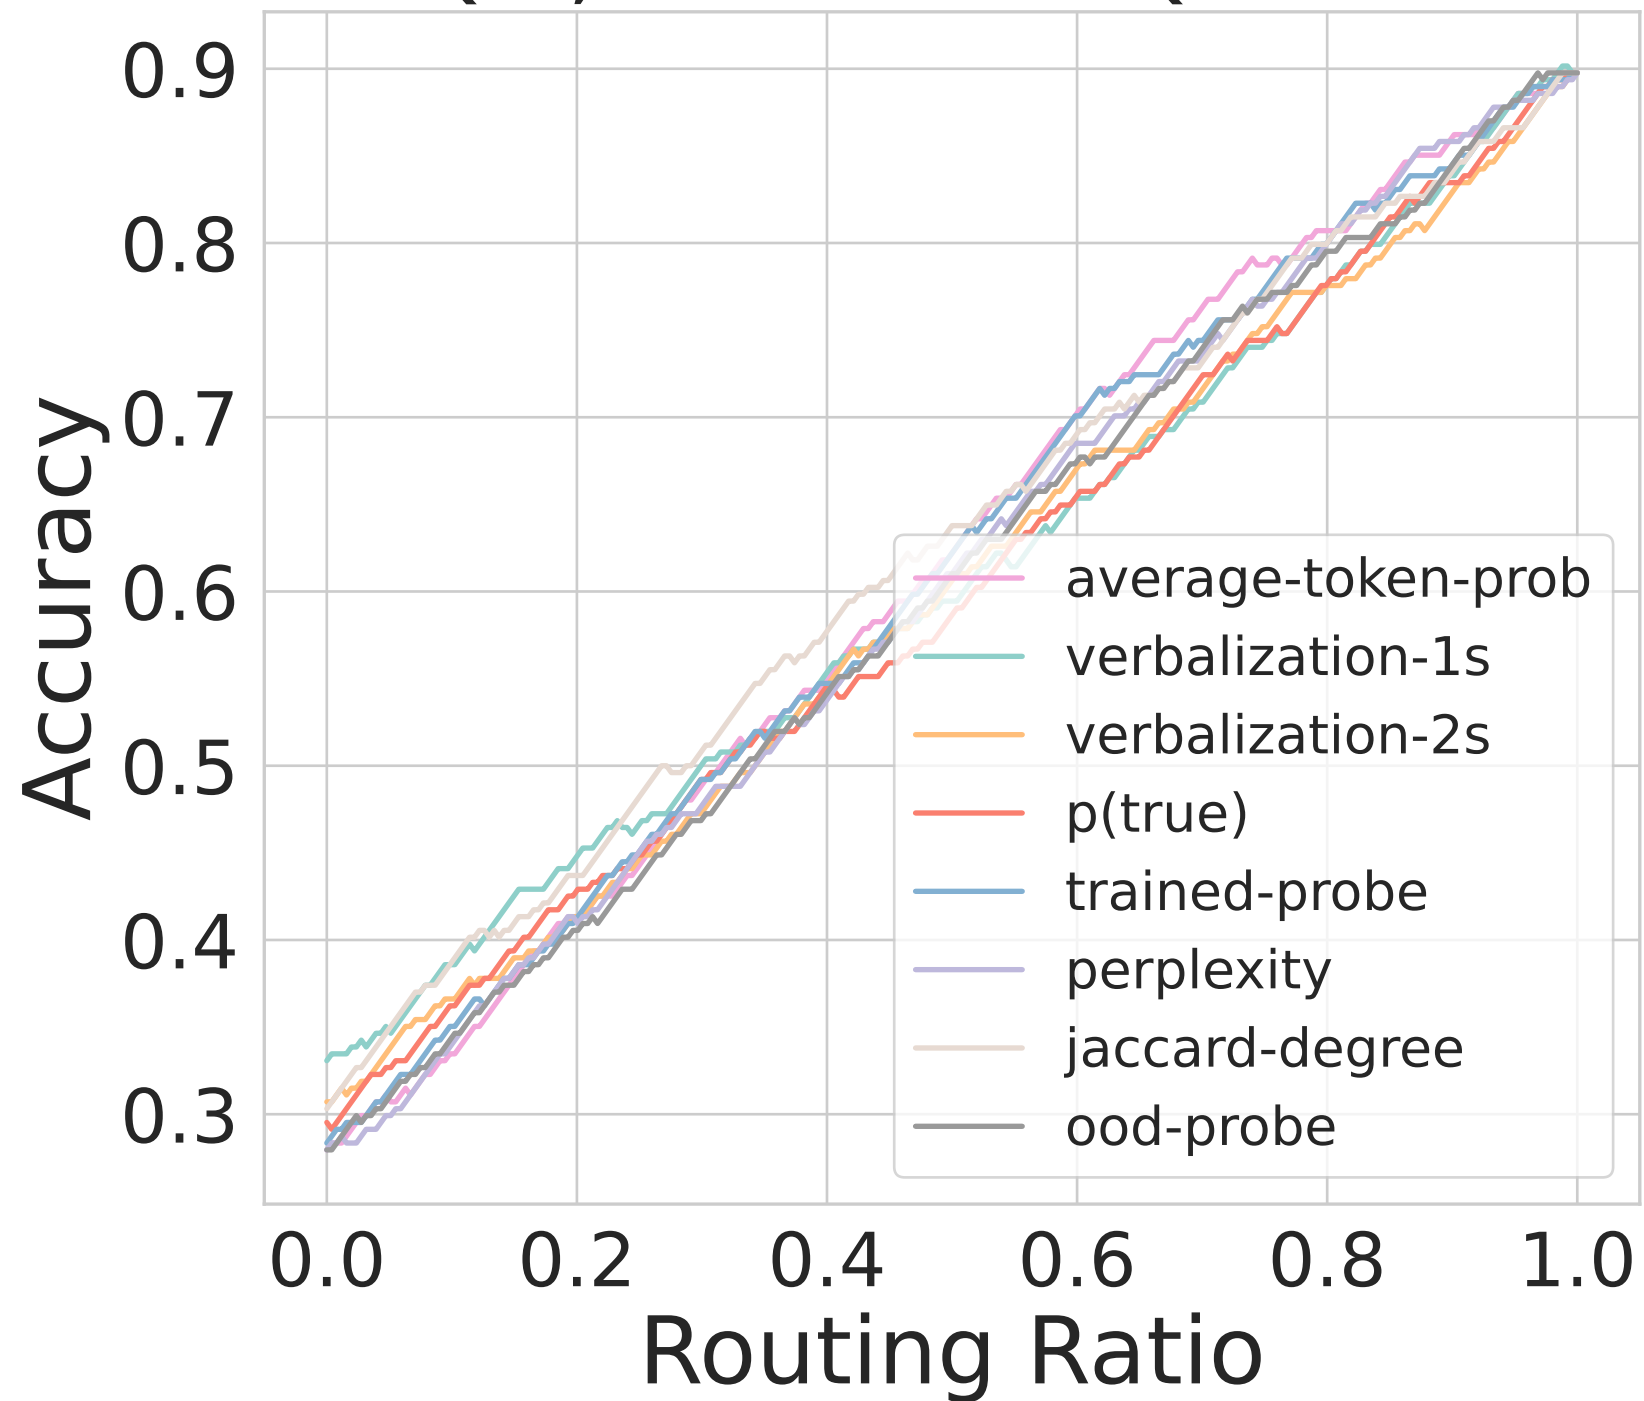

Supplement: supplementary_material [file rr_acc_aqua_llama-3.1-8b_qwen32.pdf › Routing_SLM_LLMs/Uncertainty-based Routing/w_legend/to_qwen32/rr_acc_aqua_llama-3.1-8b_qwen32.pdf]

# AQuA, llama-3.2-1b to Qwen3-32B

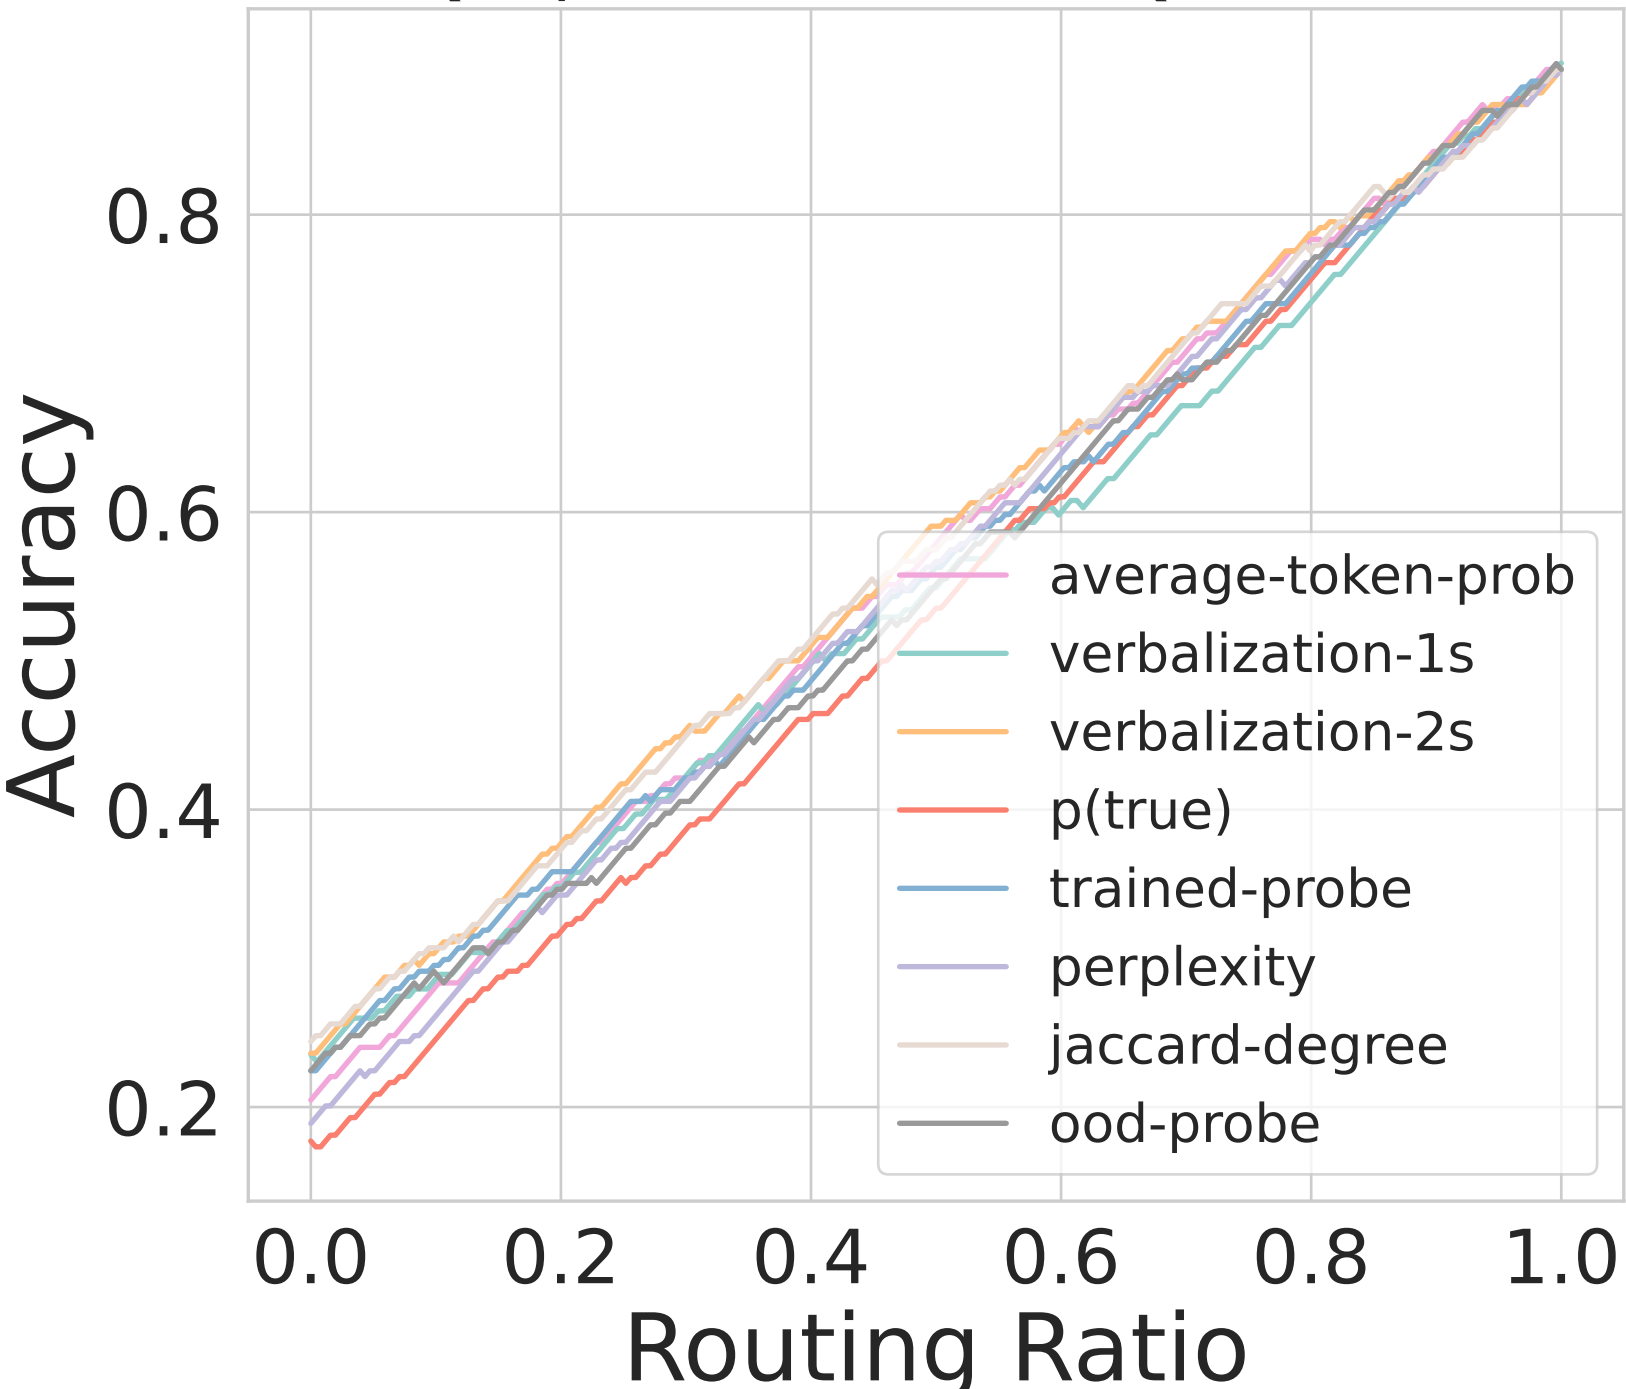

Supplement: supplementary_material [file rr_acc_aqua_llama-3.2-1b_qwen32.pdf › Routing_SLM_LLMs/Uncertainty-based Routing/w_legend/to_qwen32/rr_acc_aqua_llama-3.2-1b_qwen32.pdf]

**AQuA, llama-3.2-3b to Qwen3-32B**

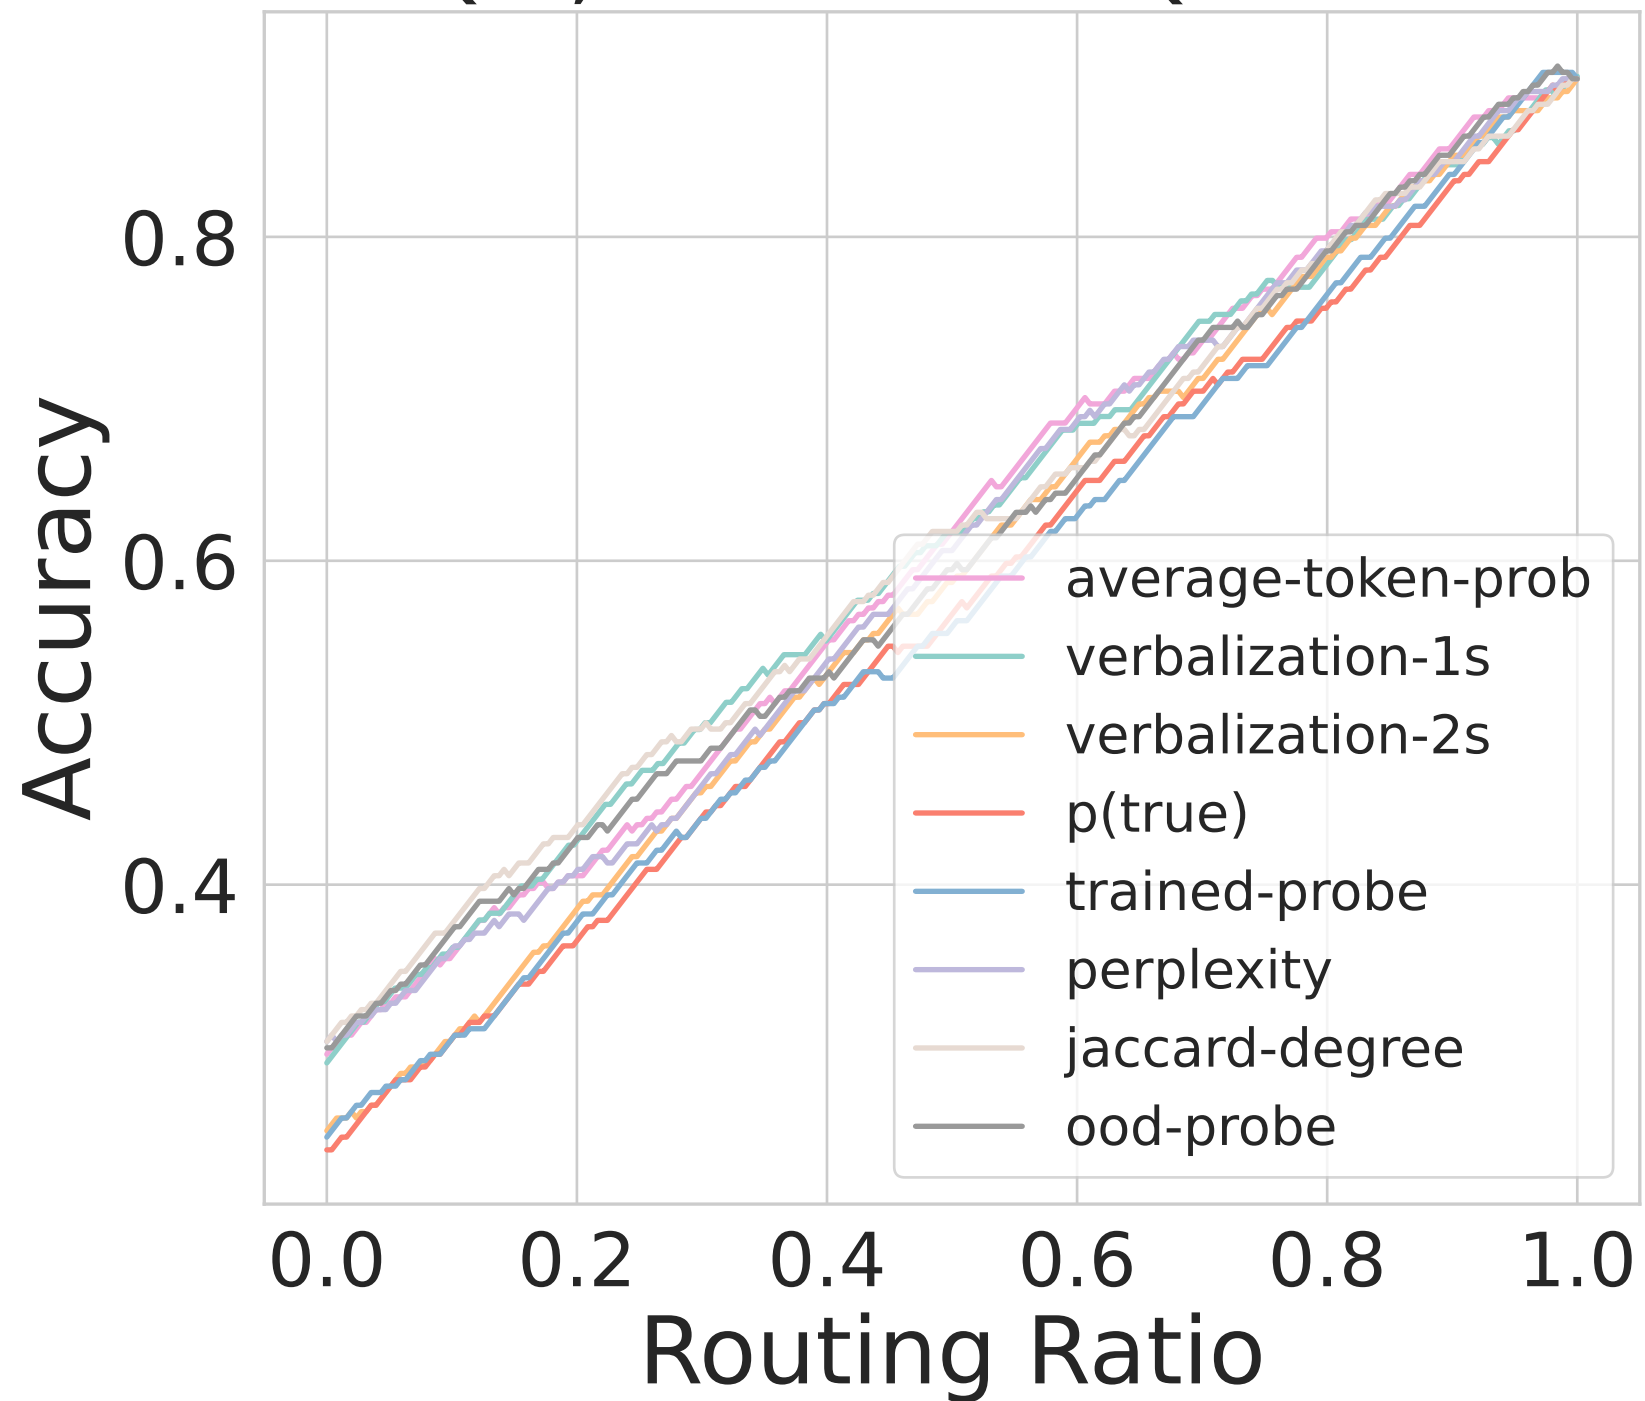

Supplement: supplementary_material [file rr_acc_aqua_llama-3.2-3b_qwen32.pdf › Routing_SLM_LLMs/Uncertainty-based Routing/w_legend/to_qwen32/rr_acc_aqua_llama-3.2-3b_qwen32.pdf]

**AQuA, mistral-7b to Qwen3-32B**

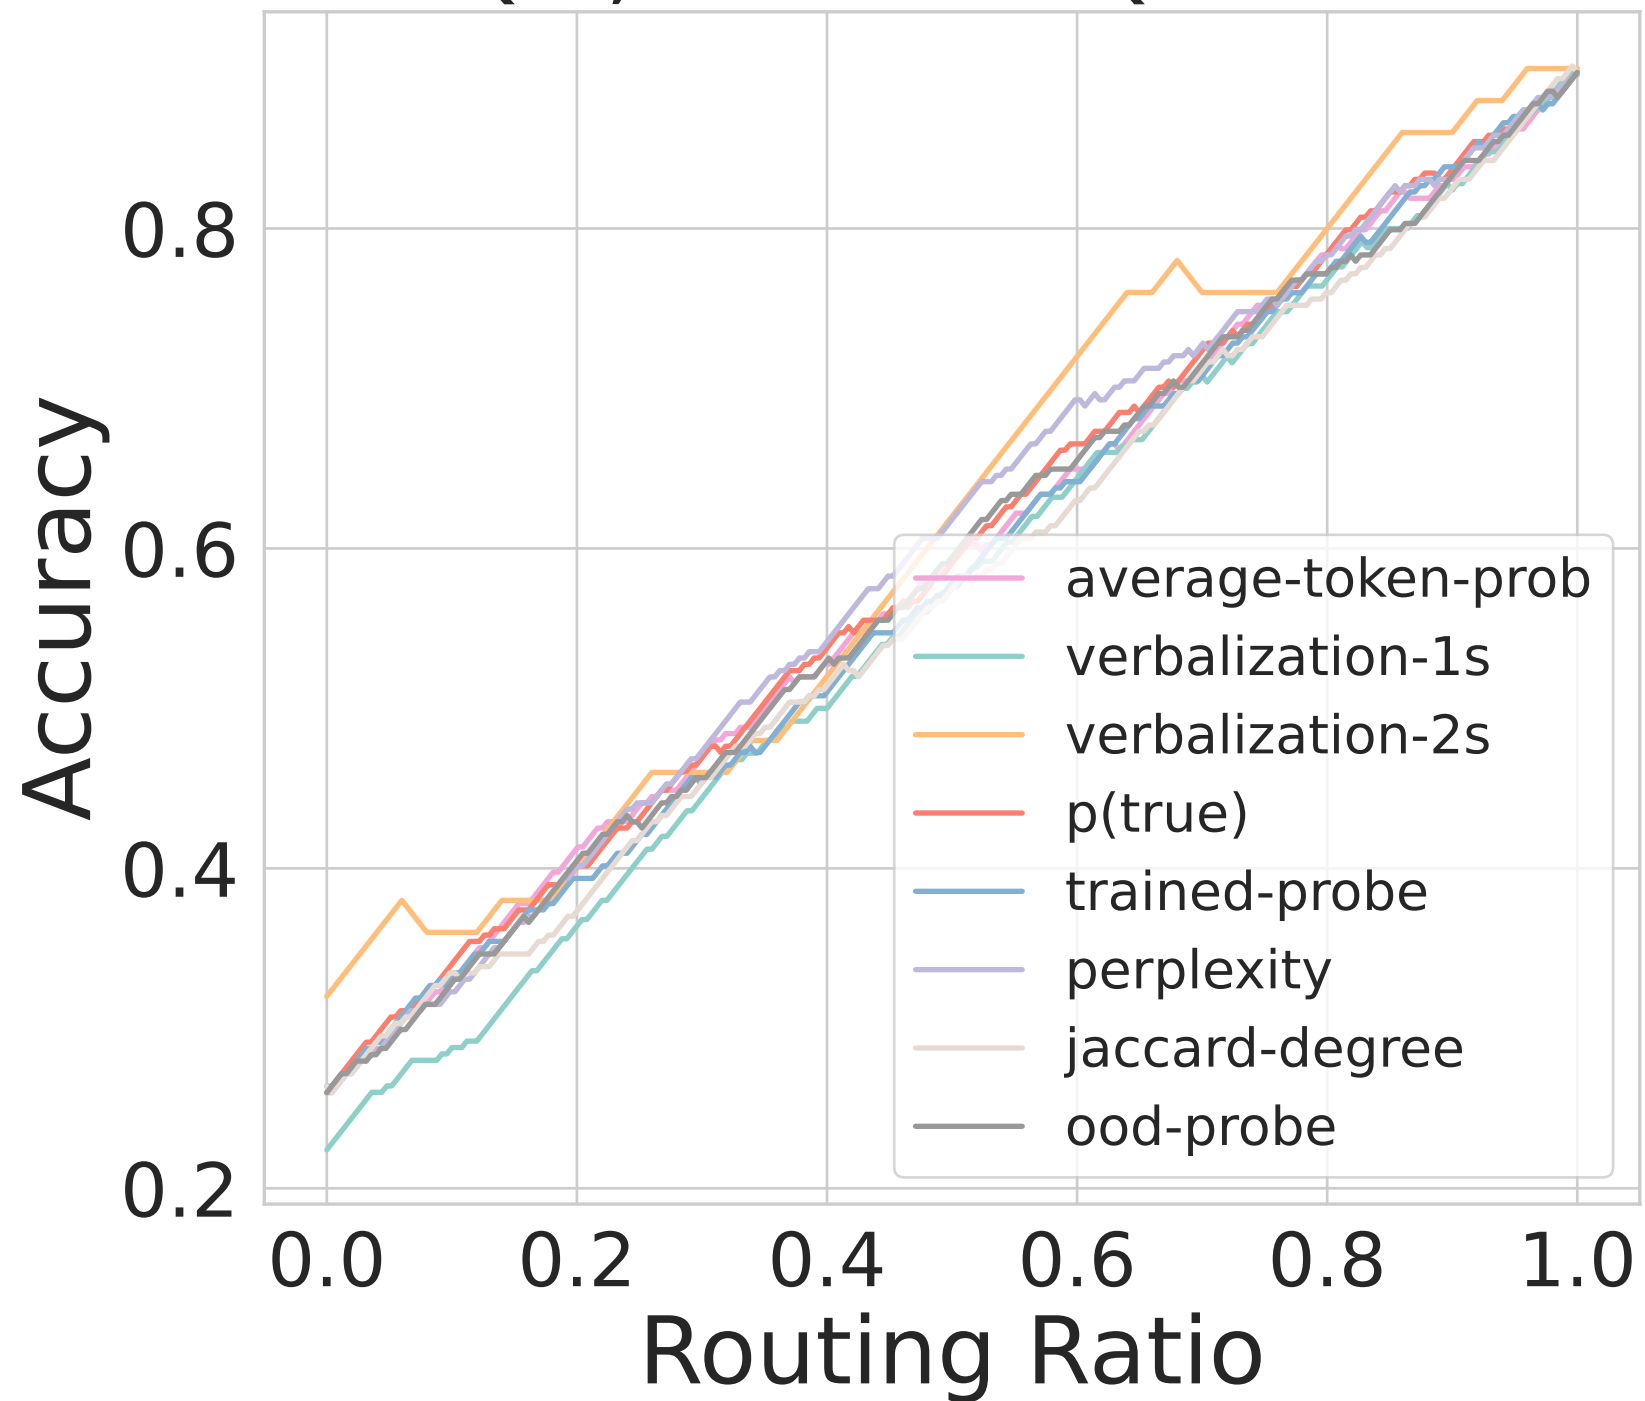

Supplement: supplementary_material [file rr_acc_aqua_mistral-7b_qwen32.pdf › Routing_SLM_LLMs/Uncertainty-based Routing/w_legend/to_qwen32/rr_acc_aqua_mistral-7b_qwen32.pdf]

# AQuA, phi-3.5-mini to Qwen3-32B

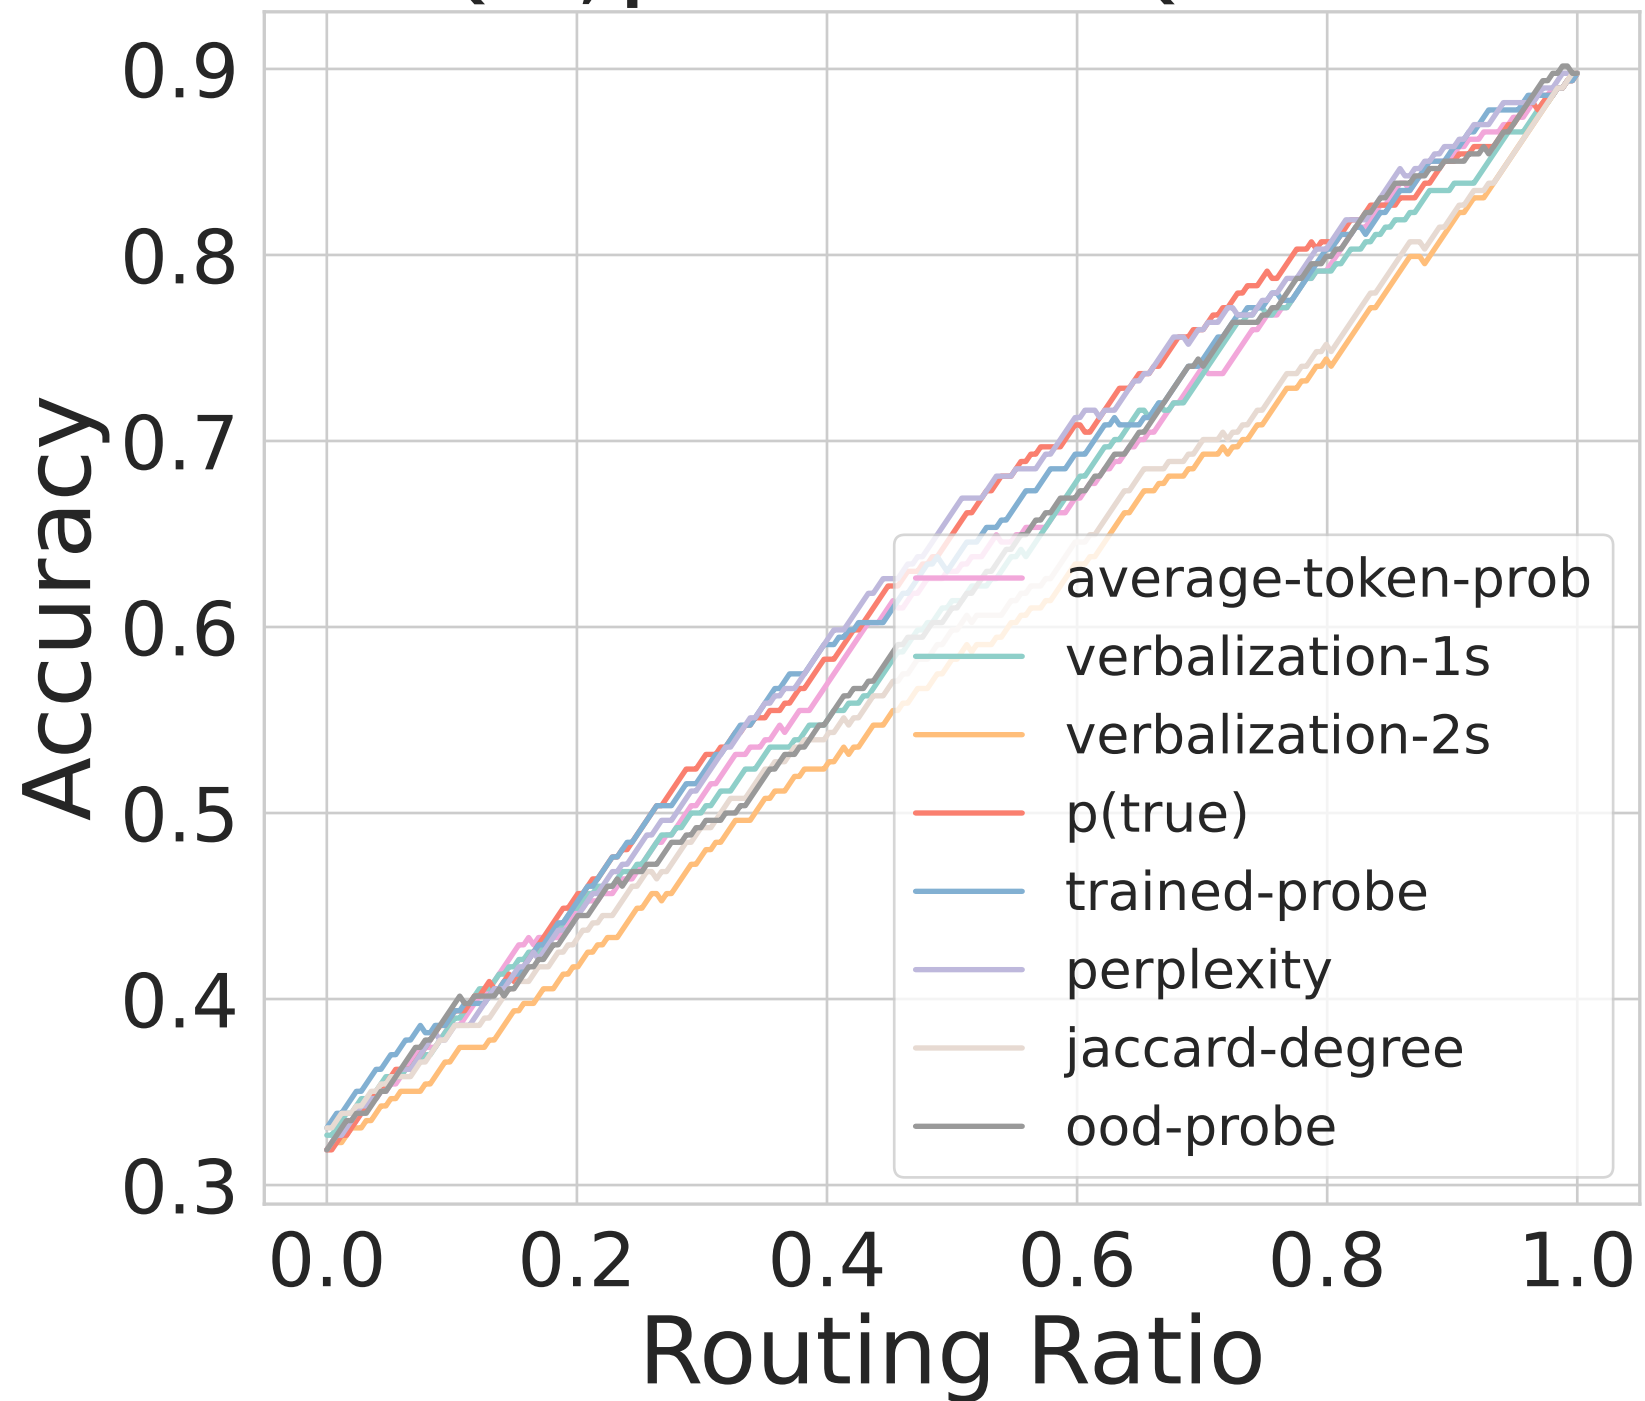

Supplement: supplementary_material [file rr_acc_aqua_phi-3.5-mini_qwen32.pdf › Routing_SLM_LLMs/Uncertainty-based Routing/w_legend/to_qwen32/rr_acc_aqua_phi-3.5-mini_qwen32.pdf]

# AQuA, phi-4-mini-reasoning to Qwen3-32B

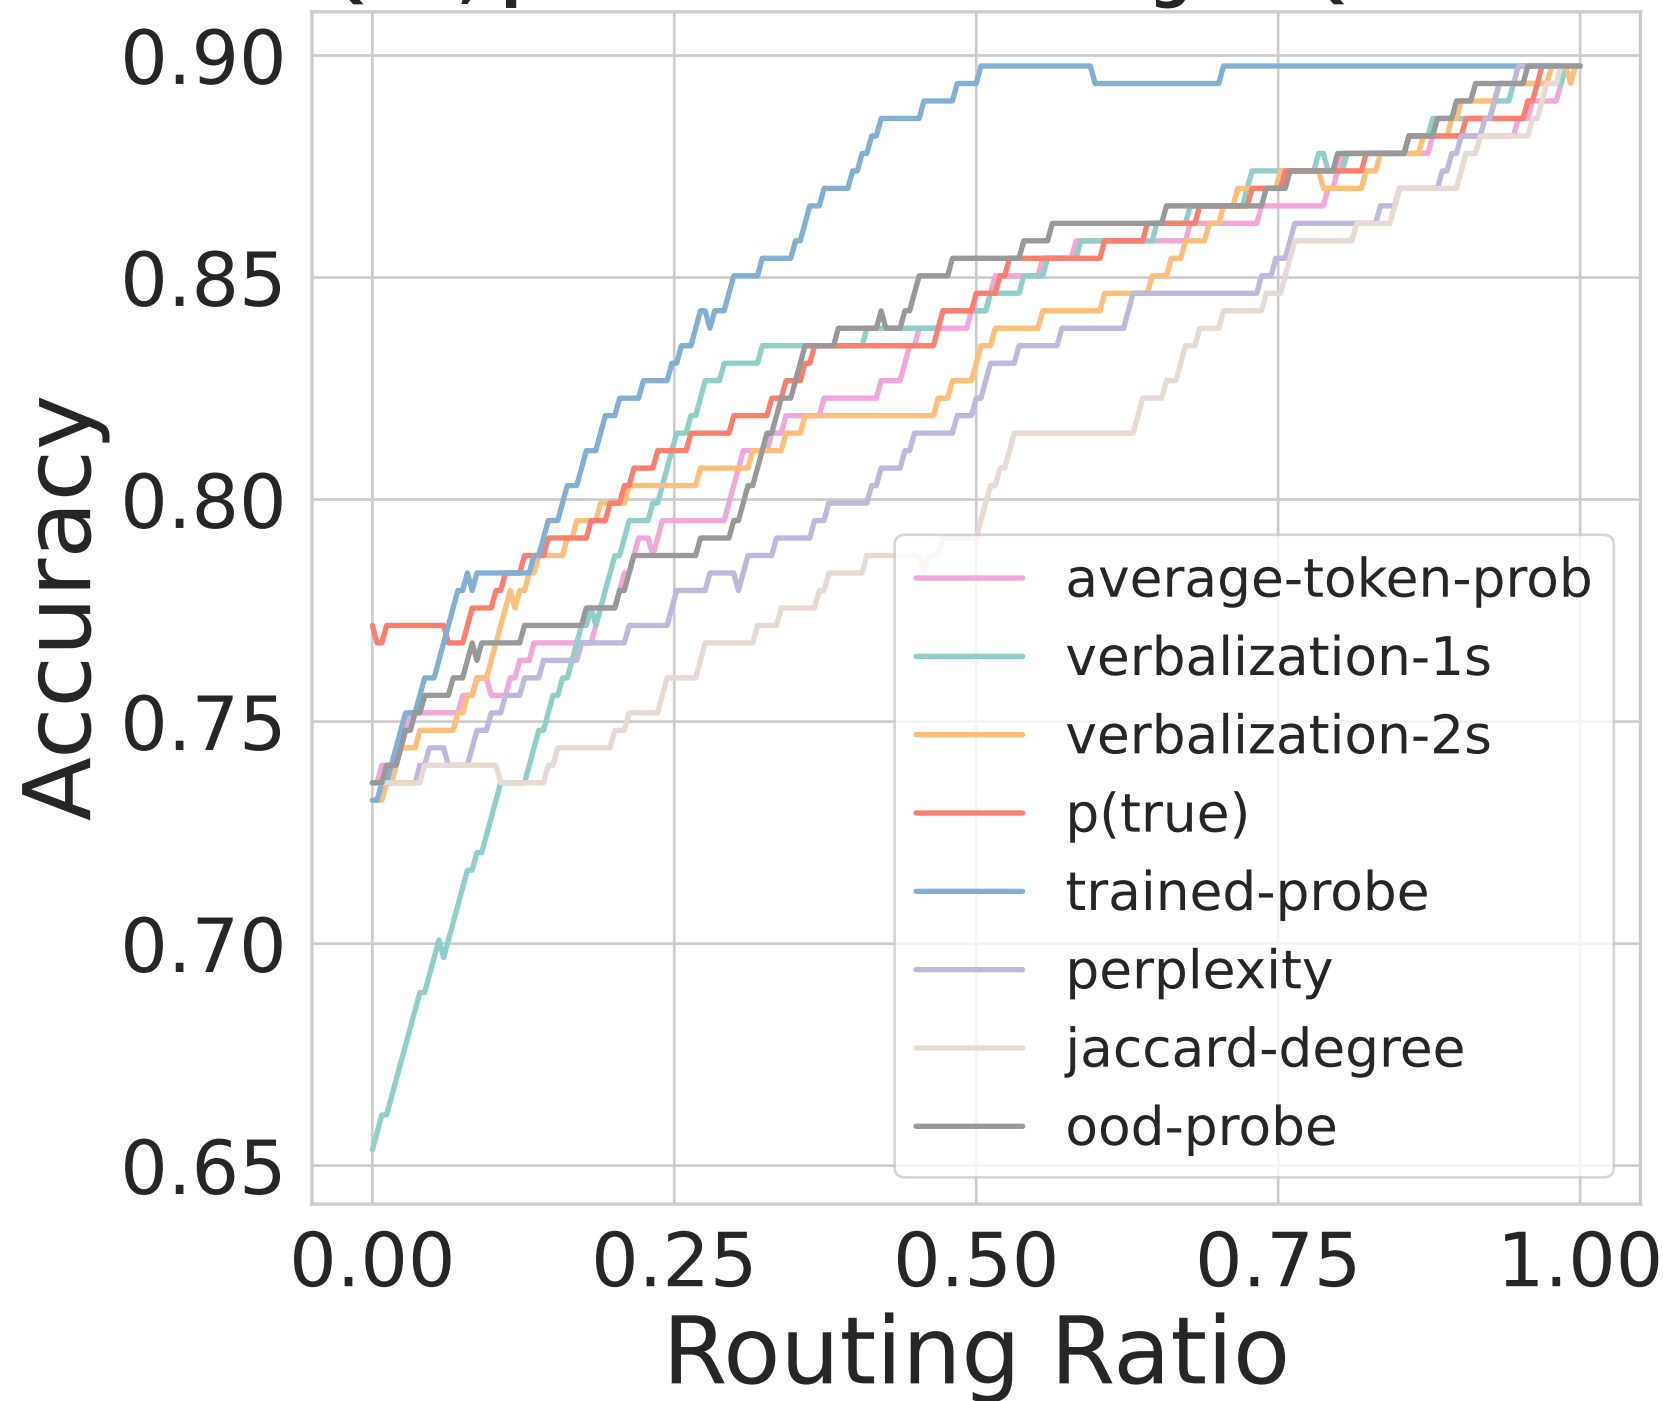

Supplement: supplementary_material [file rr_acc_aqua_phi-4-mini-reasoning_qwen32.pdf › Routing_SLM_LLMs/Uncertainty-based Routing/w_legend/to_qwen32/rr_acc_aqua_phi-4-mini-reasoning_qwen32.pdf]

**AQuA, rwkv to Qwen3-32B**

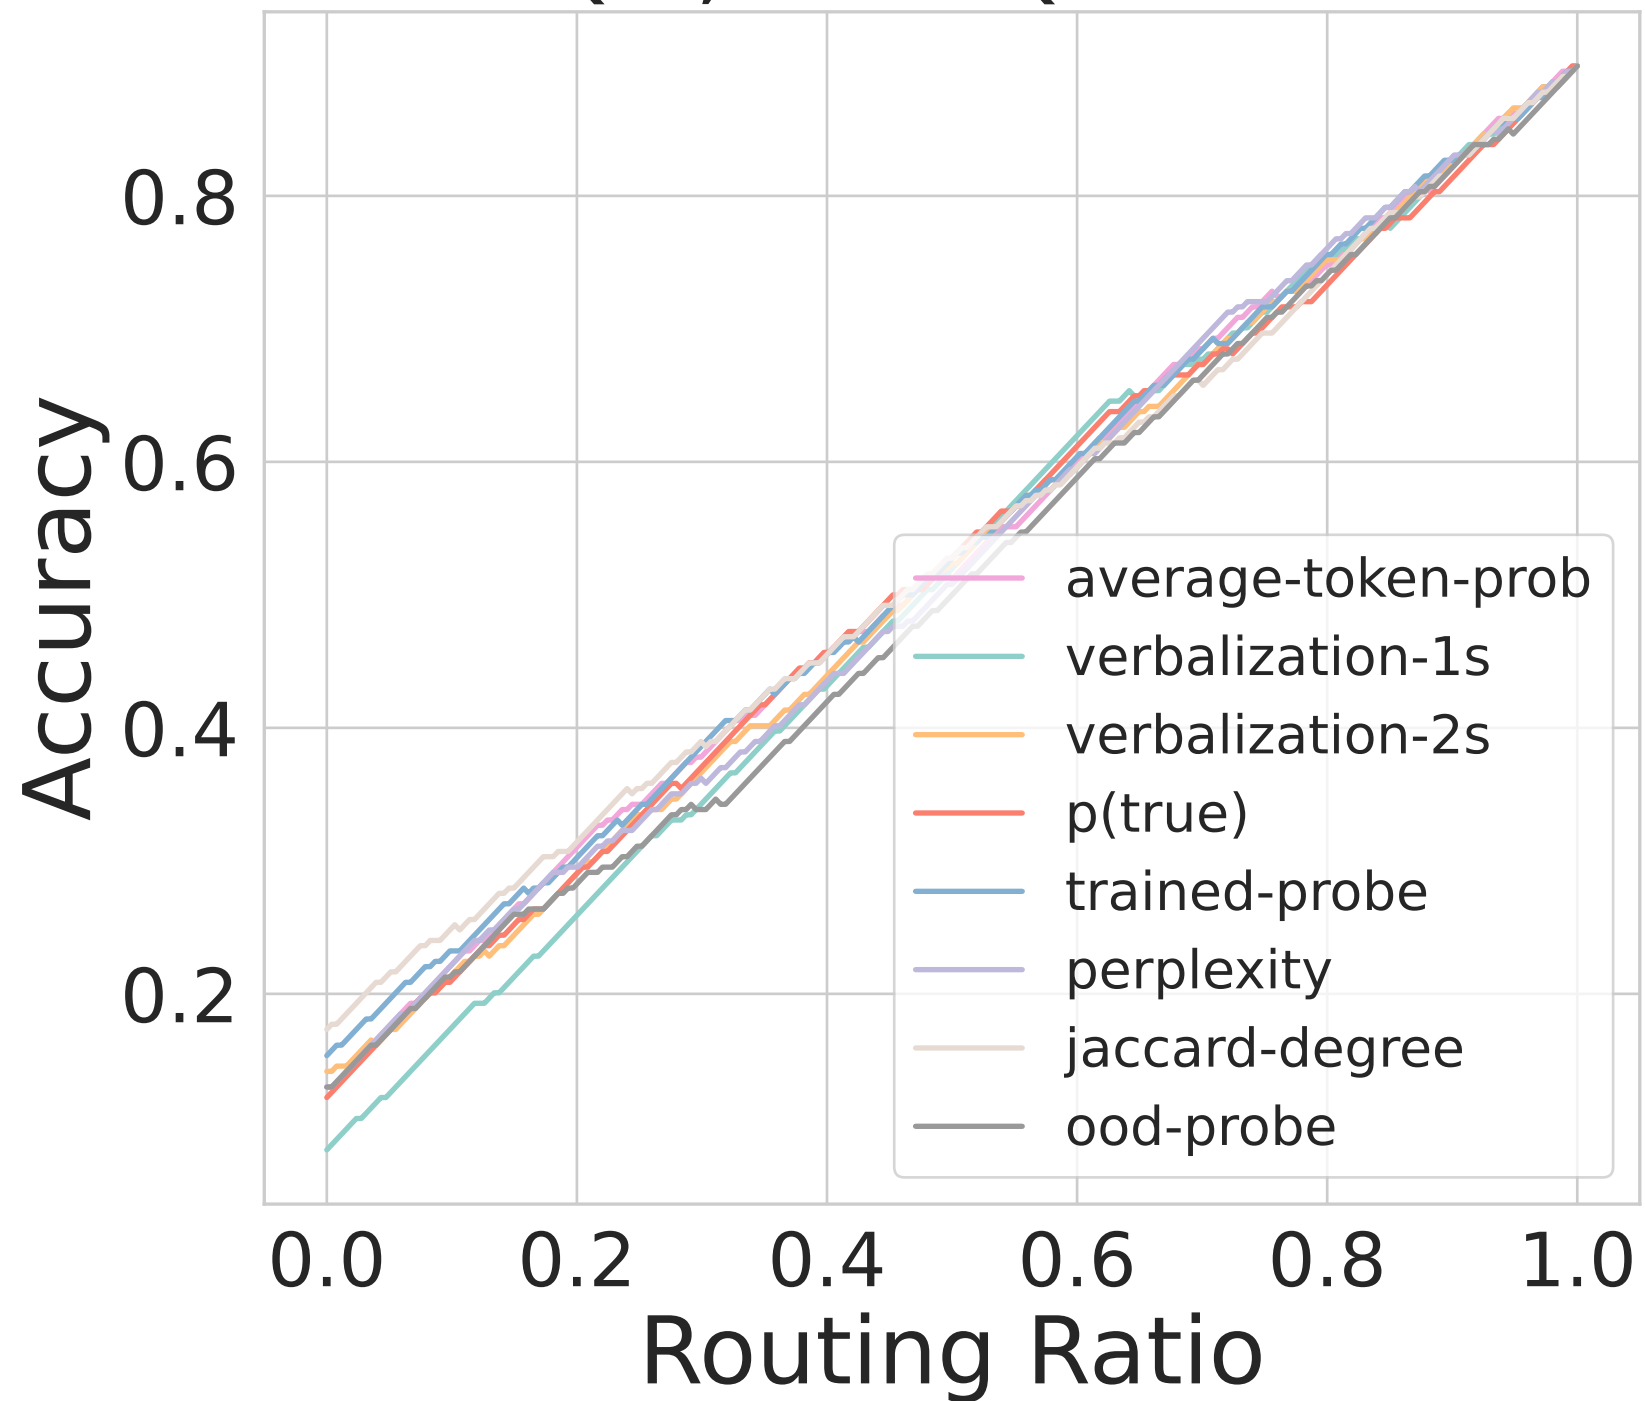

Supplement: supplementary_material [file rr_acc_aqua_rwkv_qwen32.pdf › Routing_SLM_LLMs/Uncertainty-based Routing/w_legend/to_qwen32/rr_acc_aqua_rwkv_qwen32.pdf]

**BoolQ, Qwen3-0.6B to Qwen3-32B**

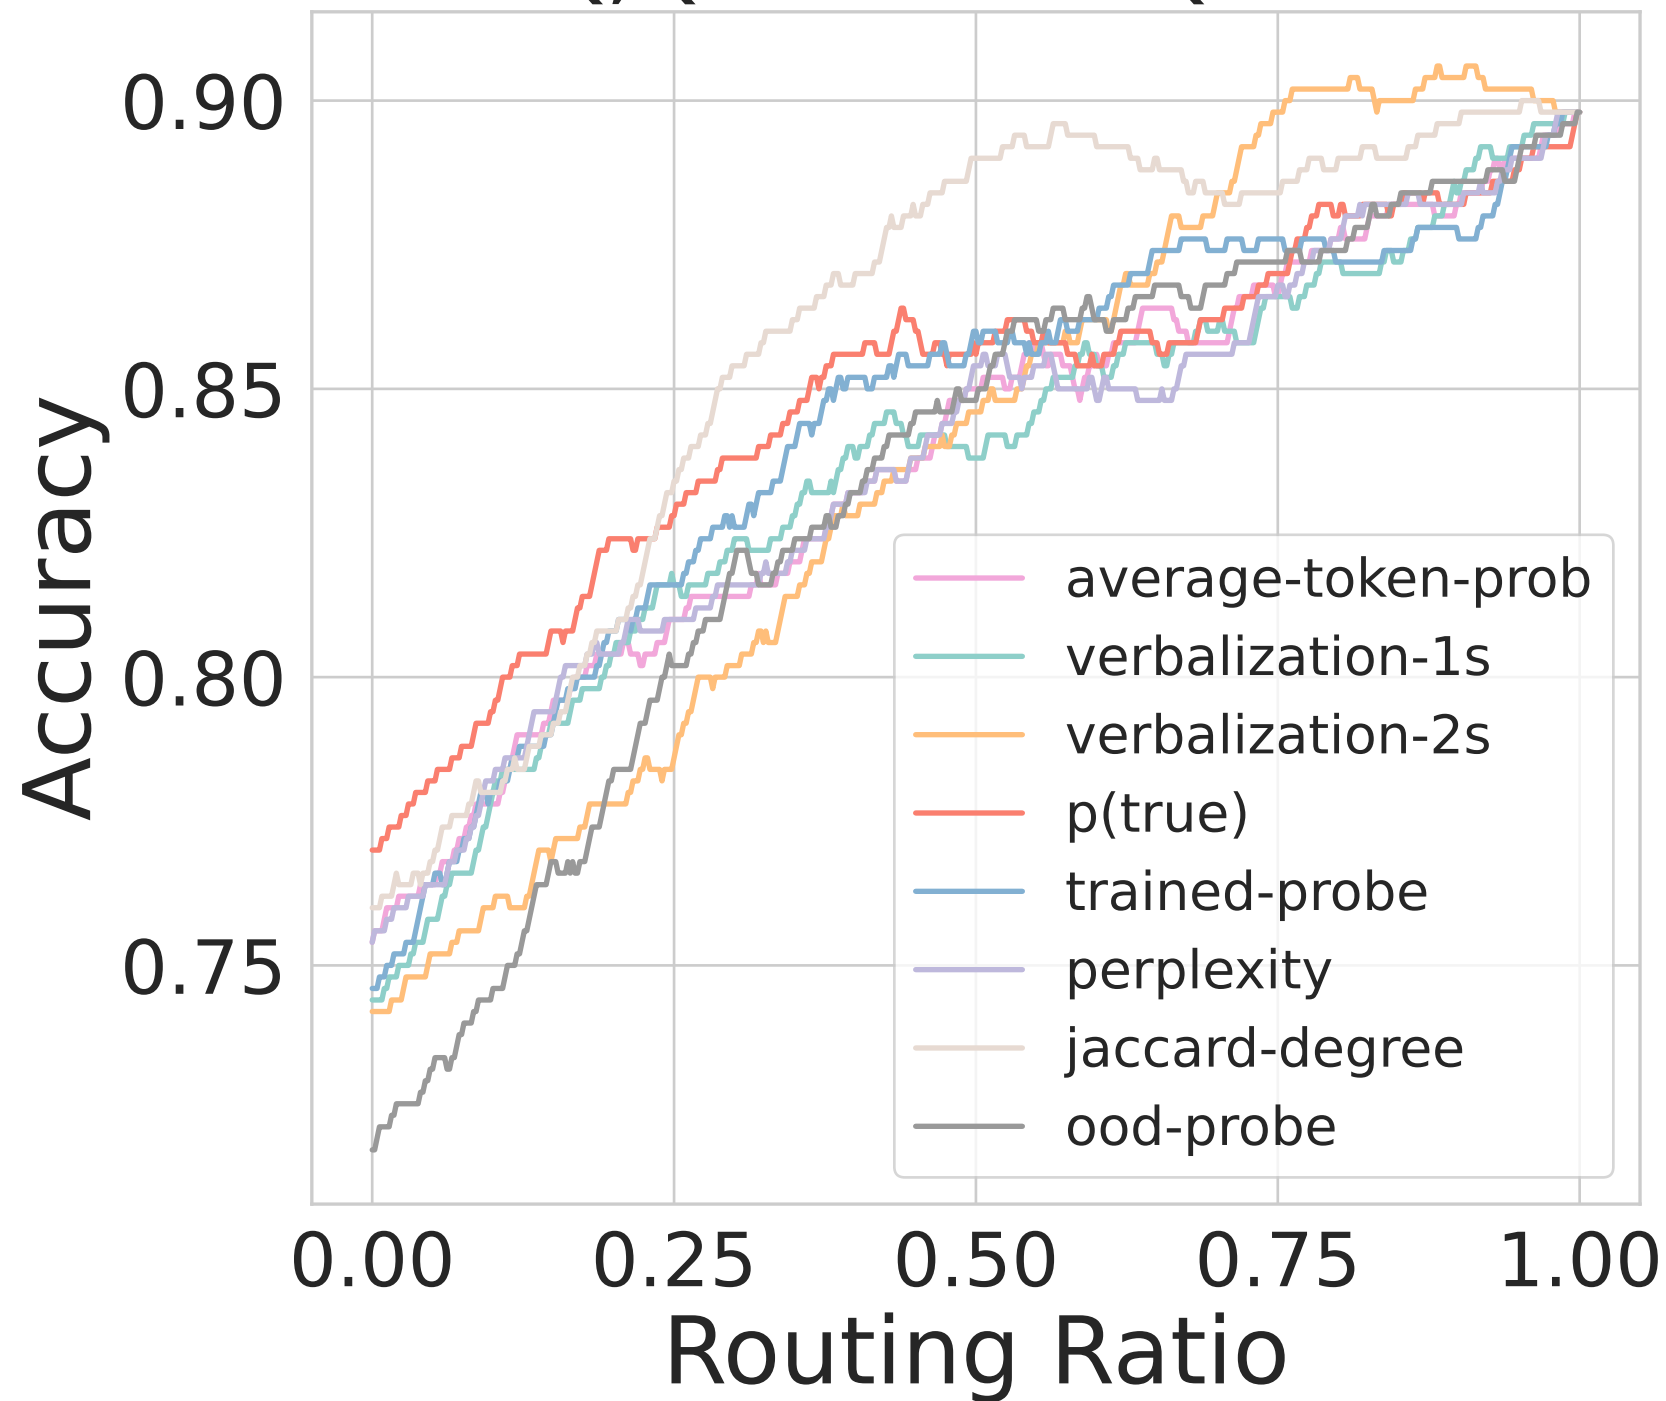

Supplement: supplementary_material [file rr_acc_boolq_Qwen3-0.6B_qwen32.pdf › Routing_SLM_LLMs/Uncertainty-based Routing/w_legend/to_qwen32/rr_acc_boolq_Qwen3-0.6B_qwen32.pdf]

**BoolQ, Qwen3-1.7B to Qwen3-32B**

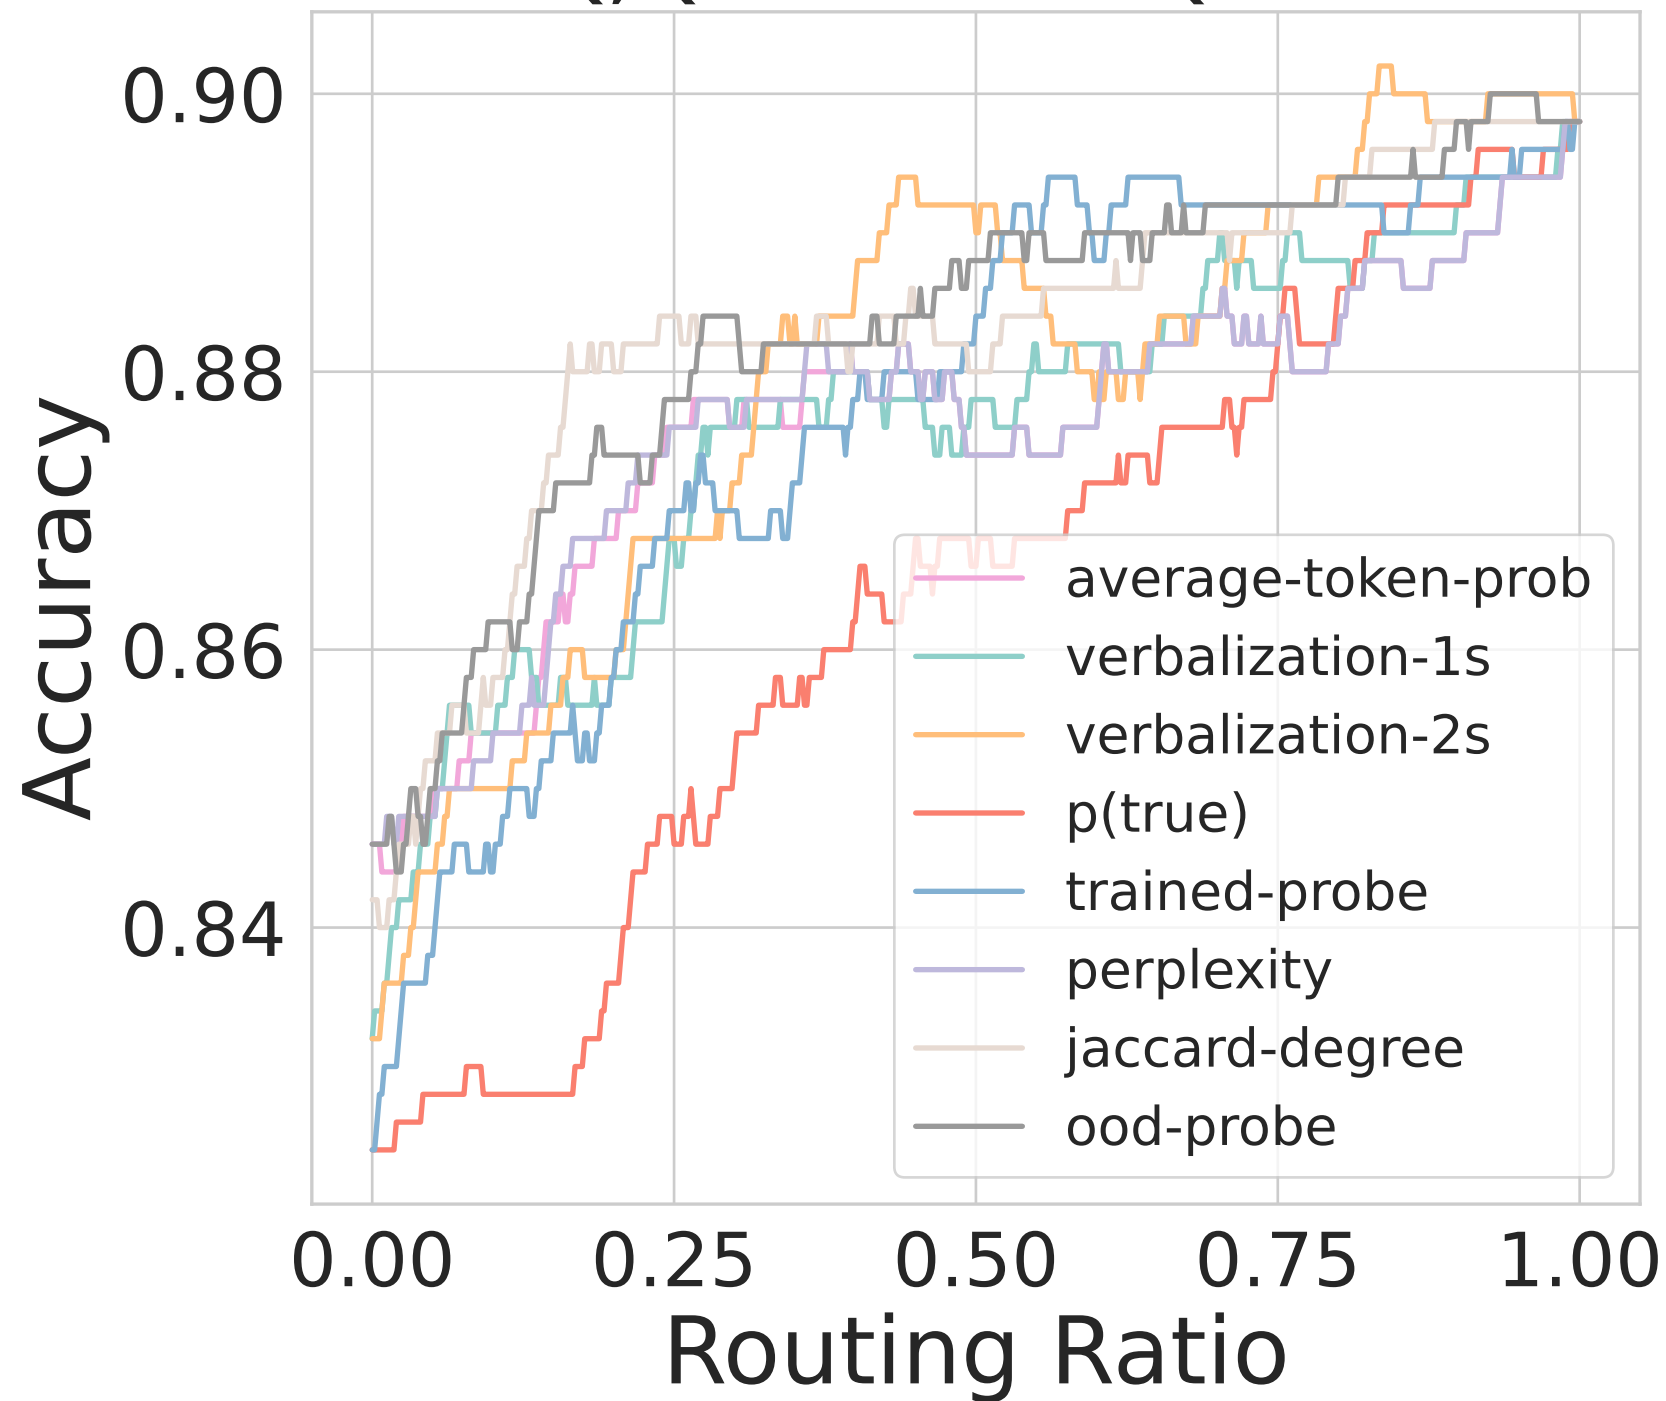

Supplement: supplementary_material [file rr_acc_boolq_Qwen3-1.7B_qwen32.pdf › Routing_SLM_LLMs/Uncertainty-based Routing/w_legend/to_qwen32/rr_acc_boolq_Qwen3-1.7B_qwen32.pdf]

**BoolQ, Qwen3-4B to Qwen3-32B**

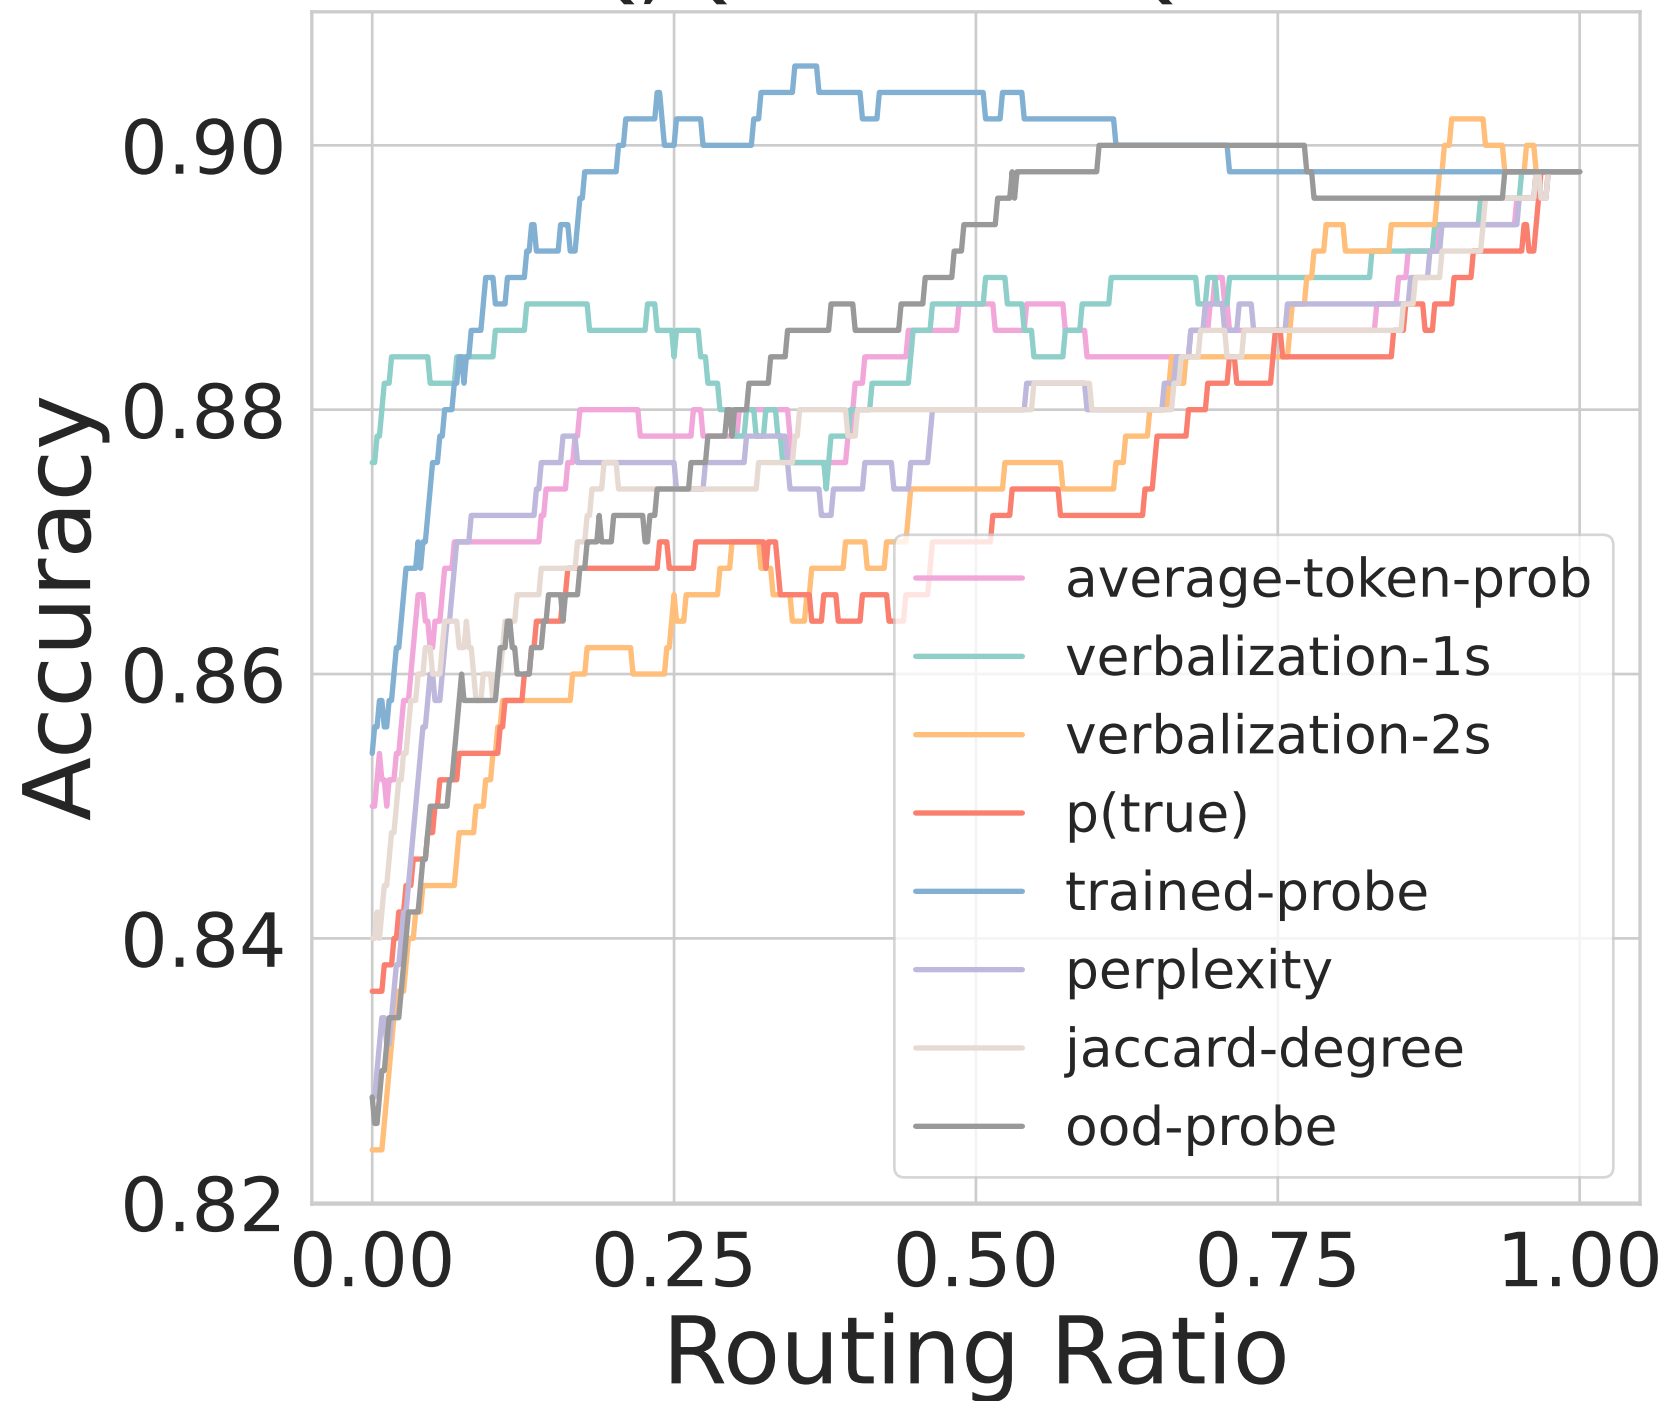

Supplement: supplementary_material [file rr_acc_boolq_Qwen3-4B_qwen32.pdf › Routing_SLM_LLMs/Uncertainty-based Routing/w_legend/to_qwen32/rr_acc_boolq_Qwen3-4B_qwen32.pdf]

**BoolQ, granite-3.1-8b to Qwen3-32B**

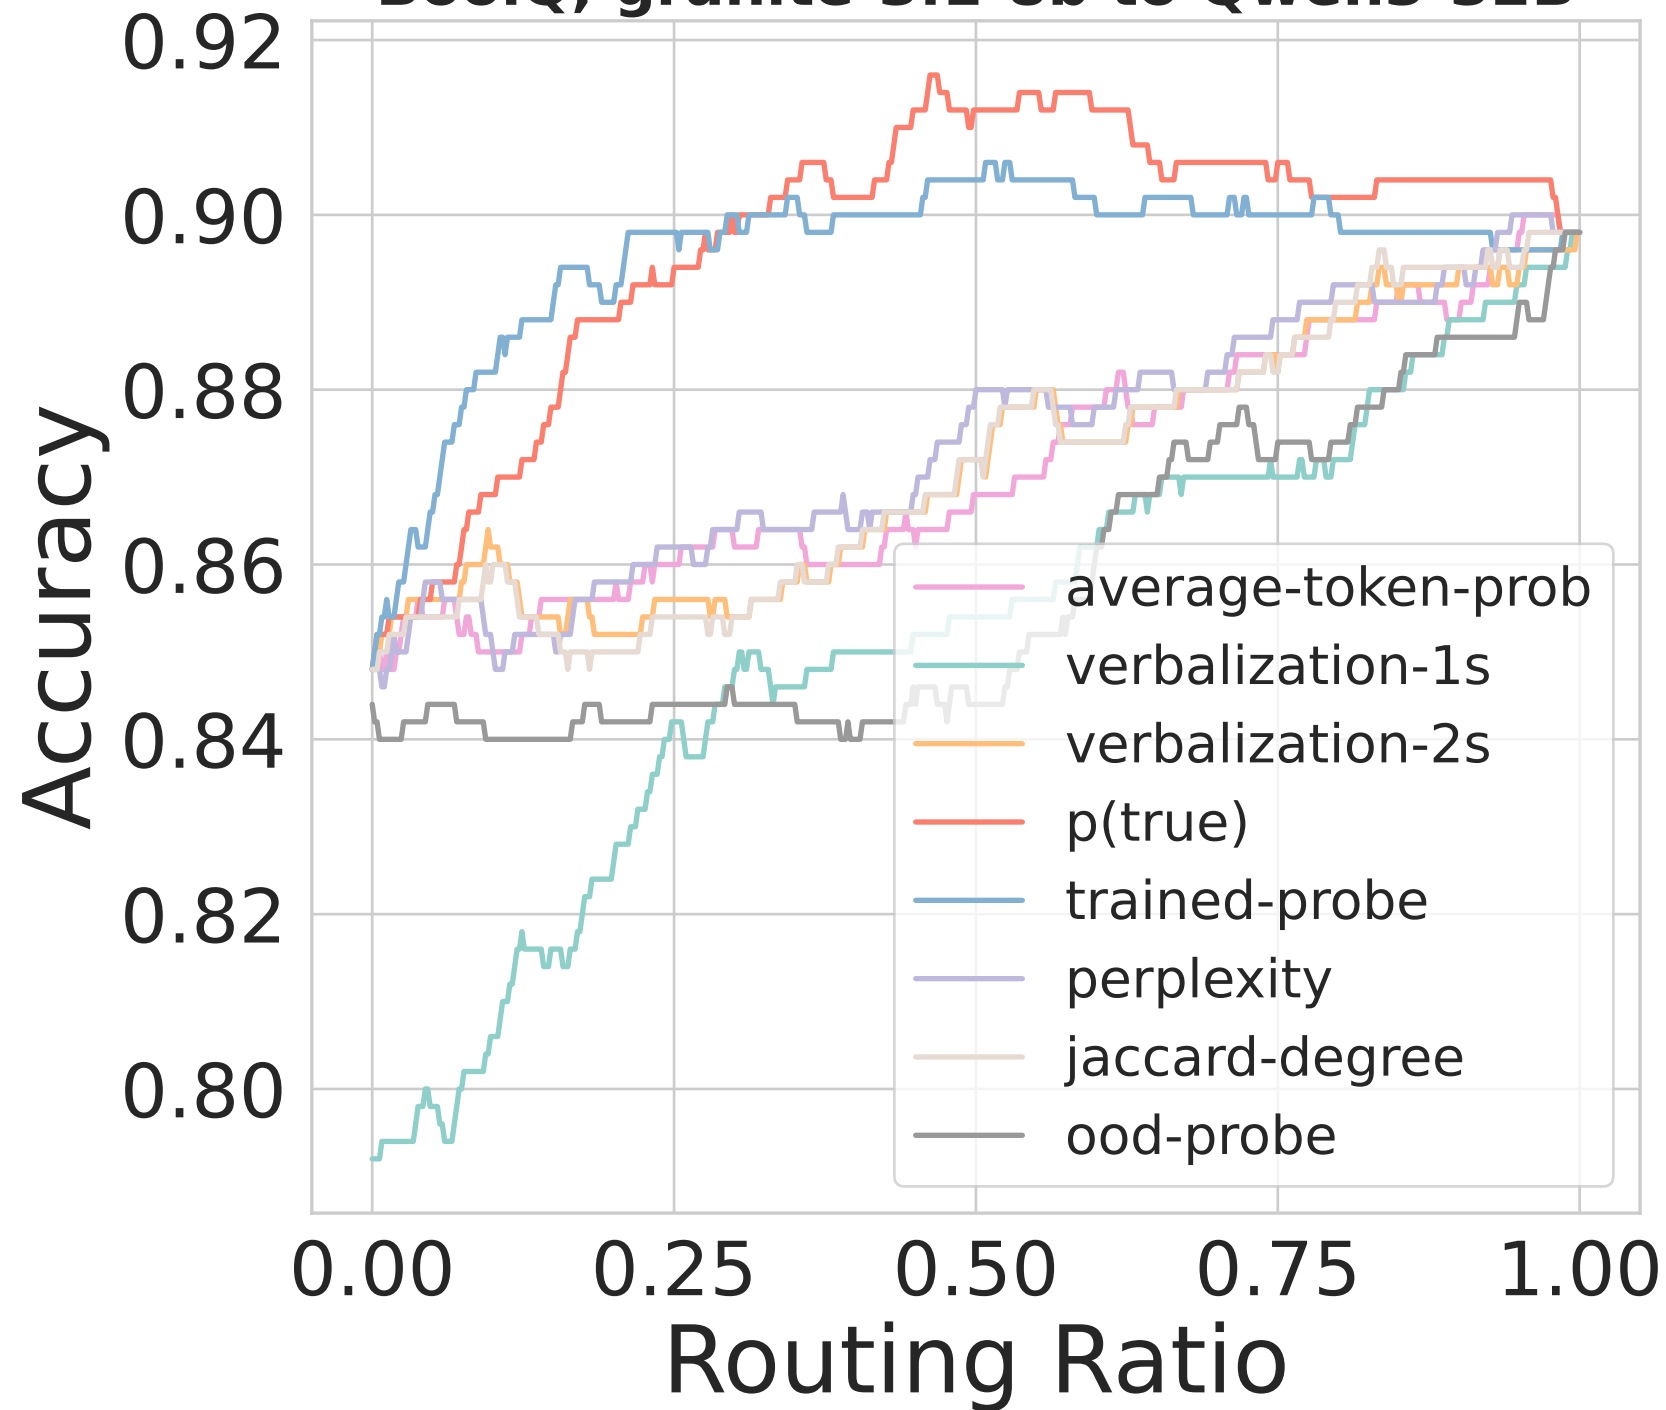

Supplement: supplementary_material [file rr_acc_boolq_granite-3.1-8b_qwen32.pdf › Routing_SLM_LLMs/Uncertainty-based Routing/w_legend/to_qwen32/rr_acc_boolq_granite-3.1-8b_qwen32.pdf]

**BoolQ, llama-3.1-8b to Qwen3-32B**

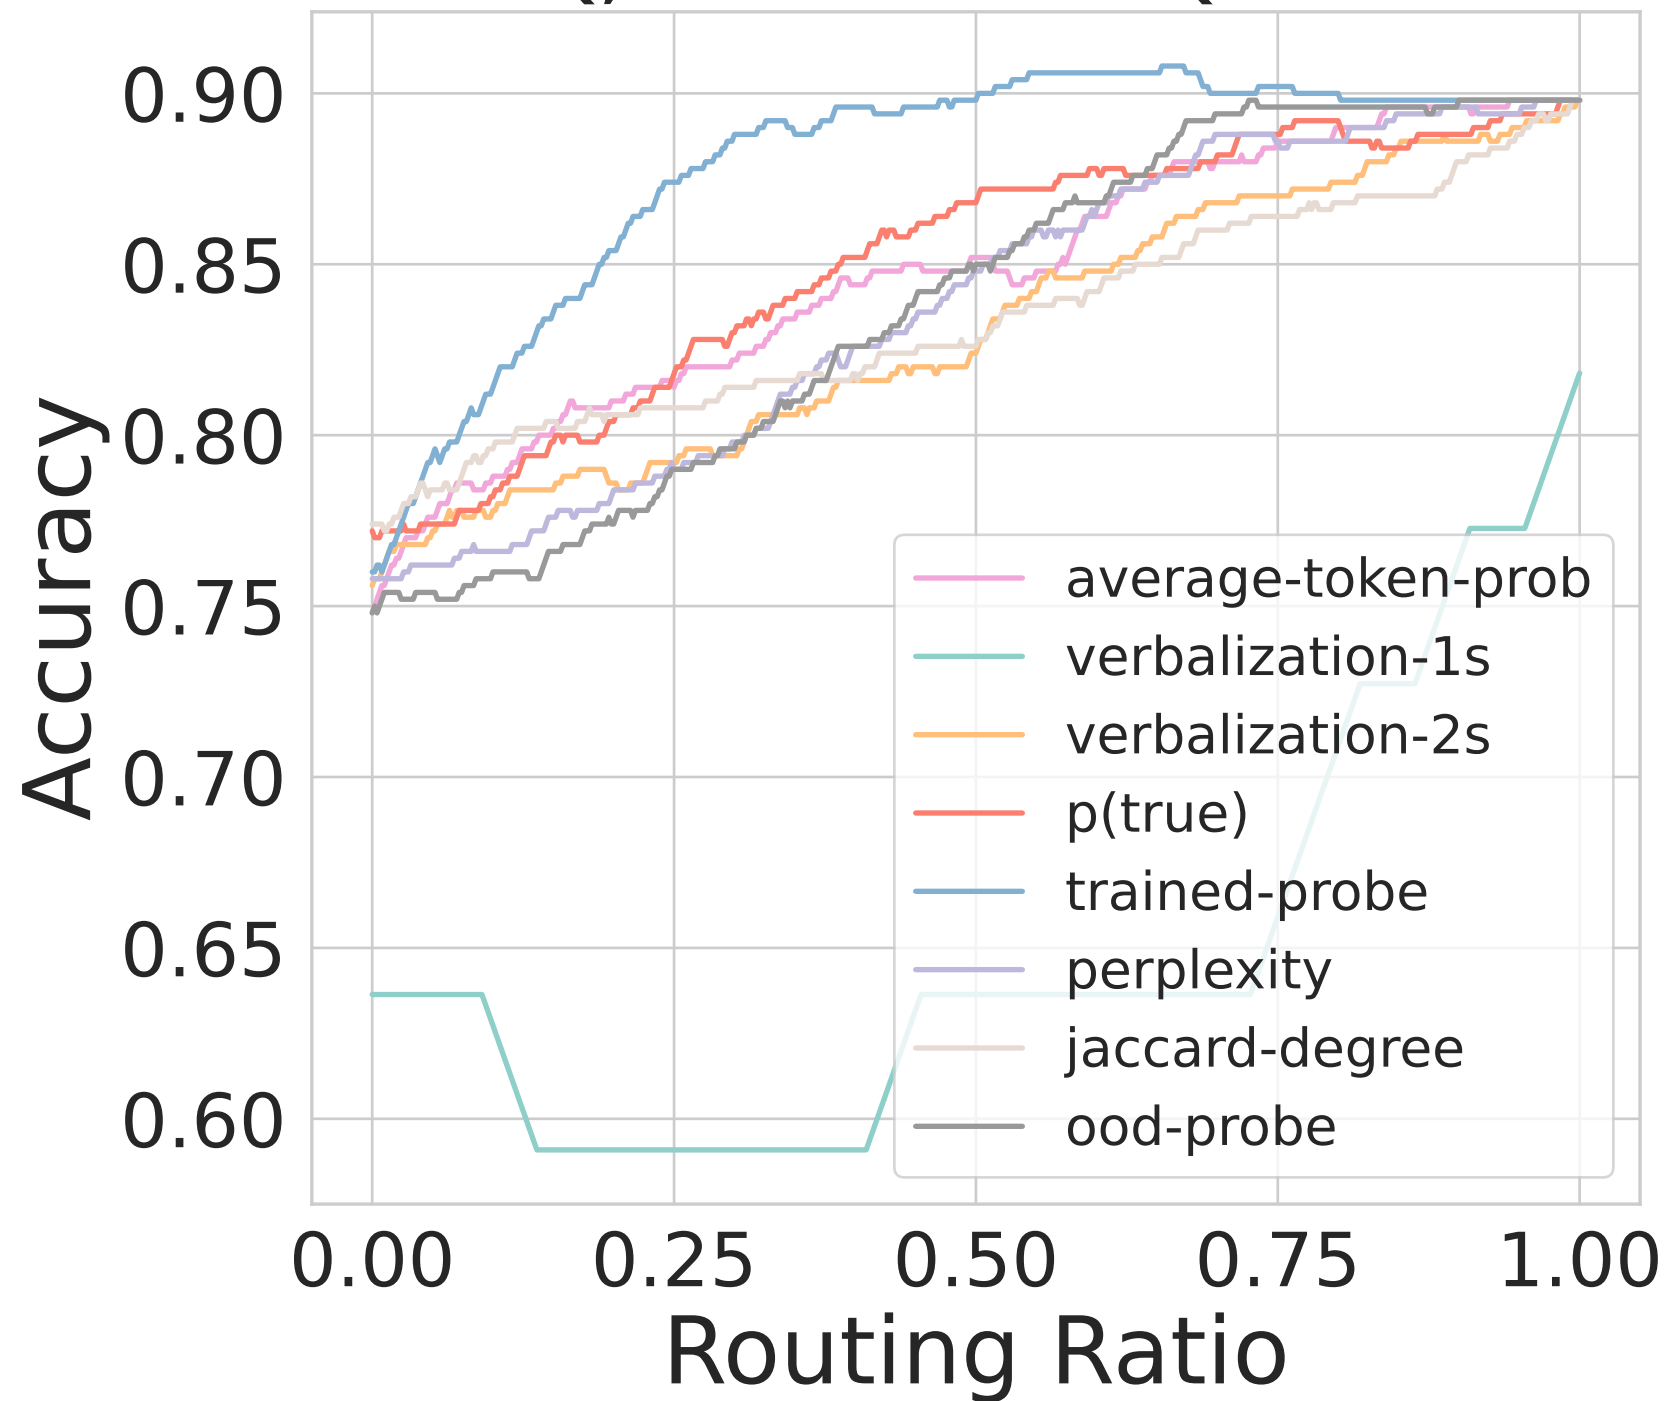

Supplement: supplementary_material [file rr_acc_boolq_llama-3.1-8b_qwen32.pdf › Routing_SLM_LLMs/Uncertainty-based Routing/w_legend/to_qwen32/rr_acc_boolq_llama-3.1-8b_qwen32.pdf]
