# Supplementary material (part 9 of 14)
Source: ML conference proceedings conference paper supplement (https://openreview.net/forum?id=smdbra3VEi)

# MultiArith, granite-3.1-8b to DeepSeek-R1

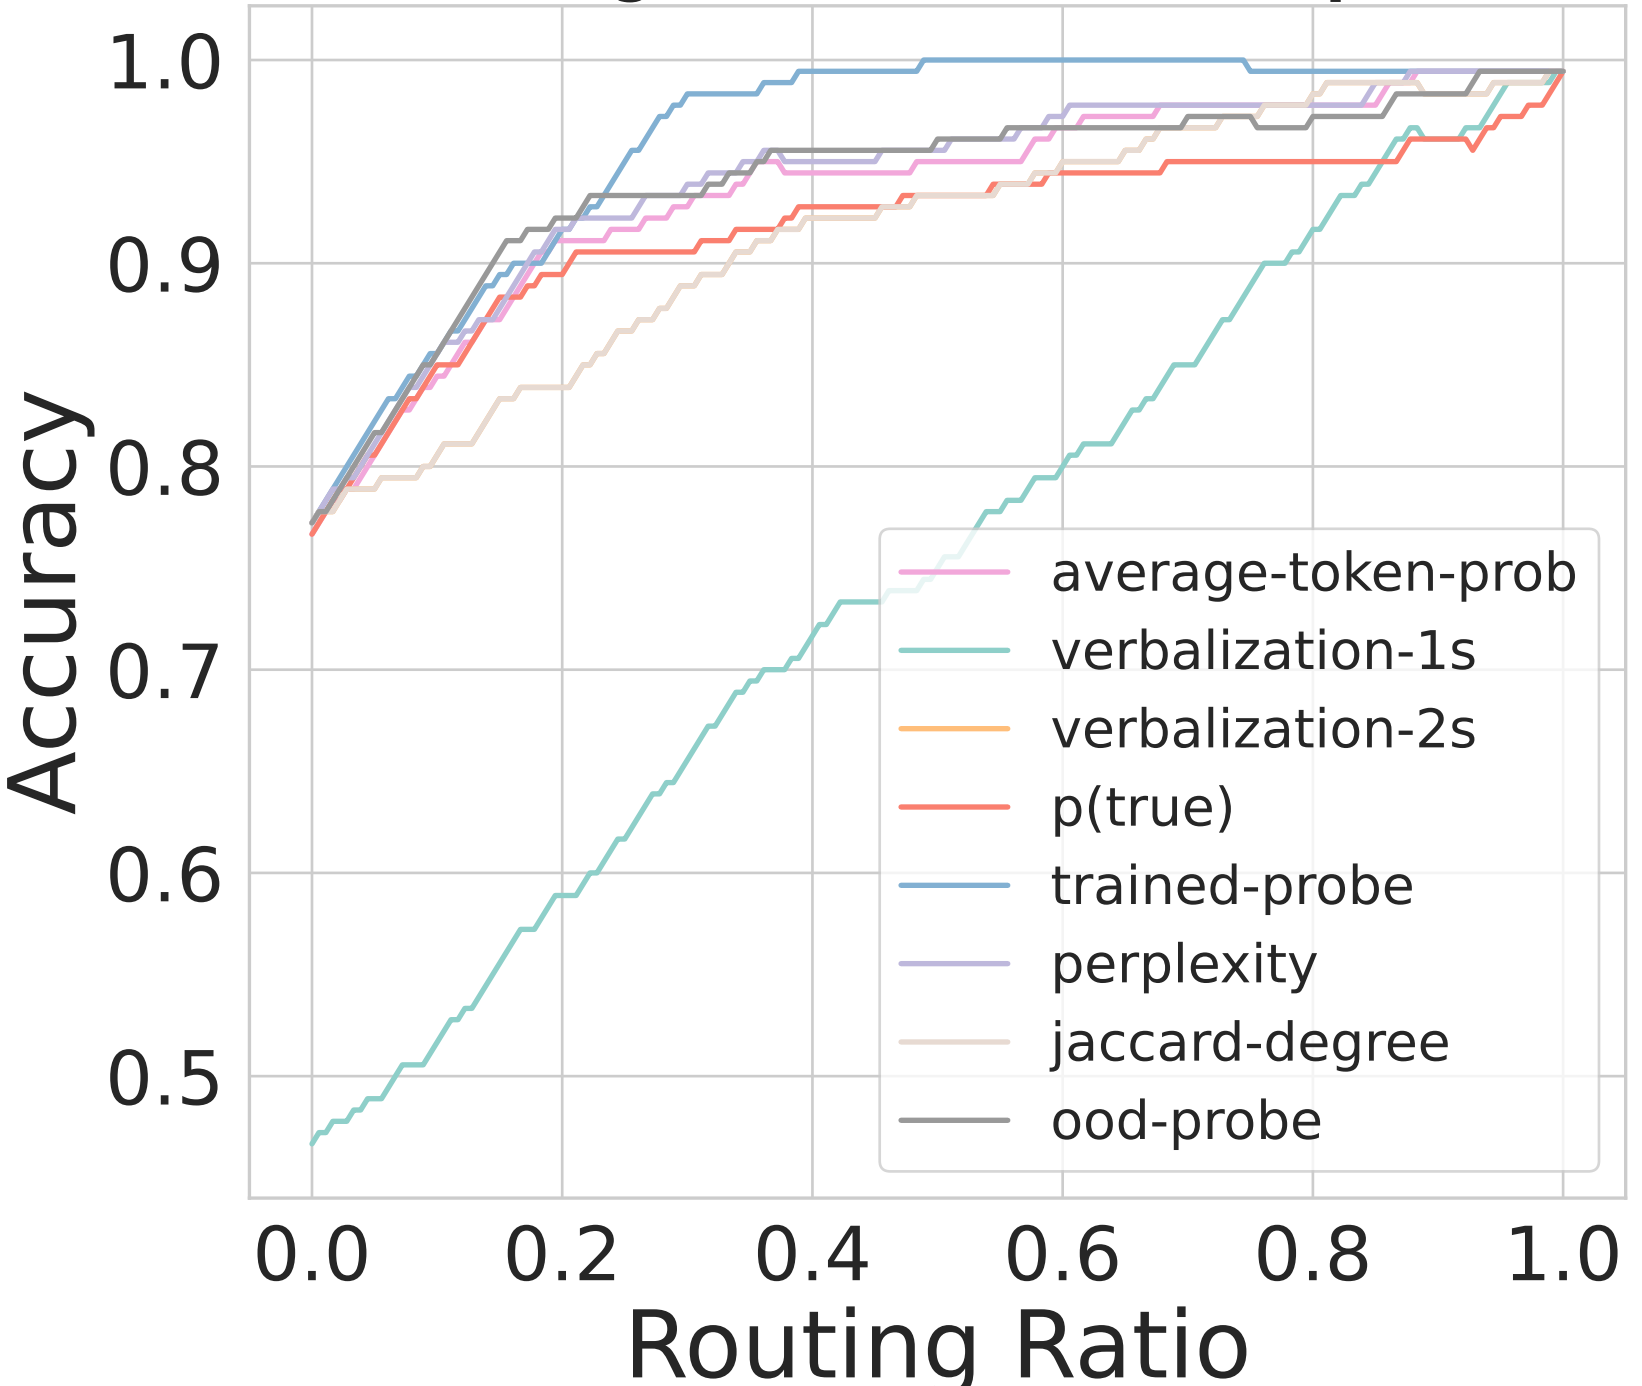

Supplement: supplementary_material [file rr_acc_multiarith_granite-3.1-8b_dsR1.pdf › Routing_SLM_LLMs/Uncertainty-based Routing/w_legend/to_dsR1/rr_acc_multiarith_granite-3.1-8b_dsR1.pdf]

**MultiArith, llama-3.1-8b to DeepSeek-R1**

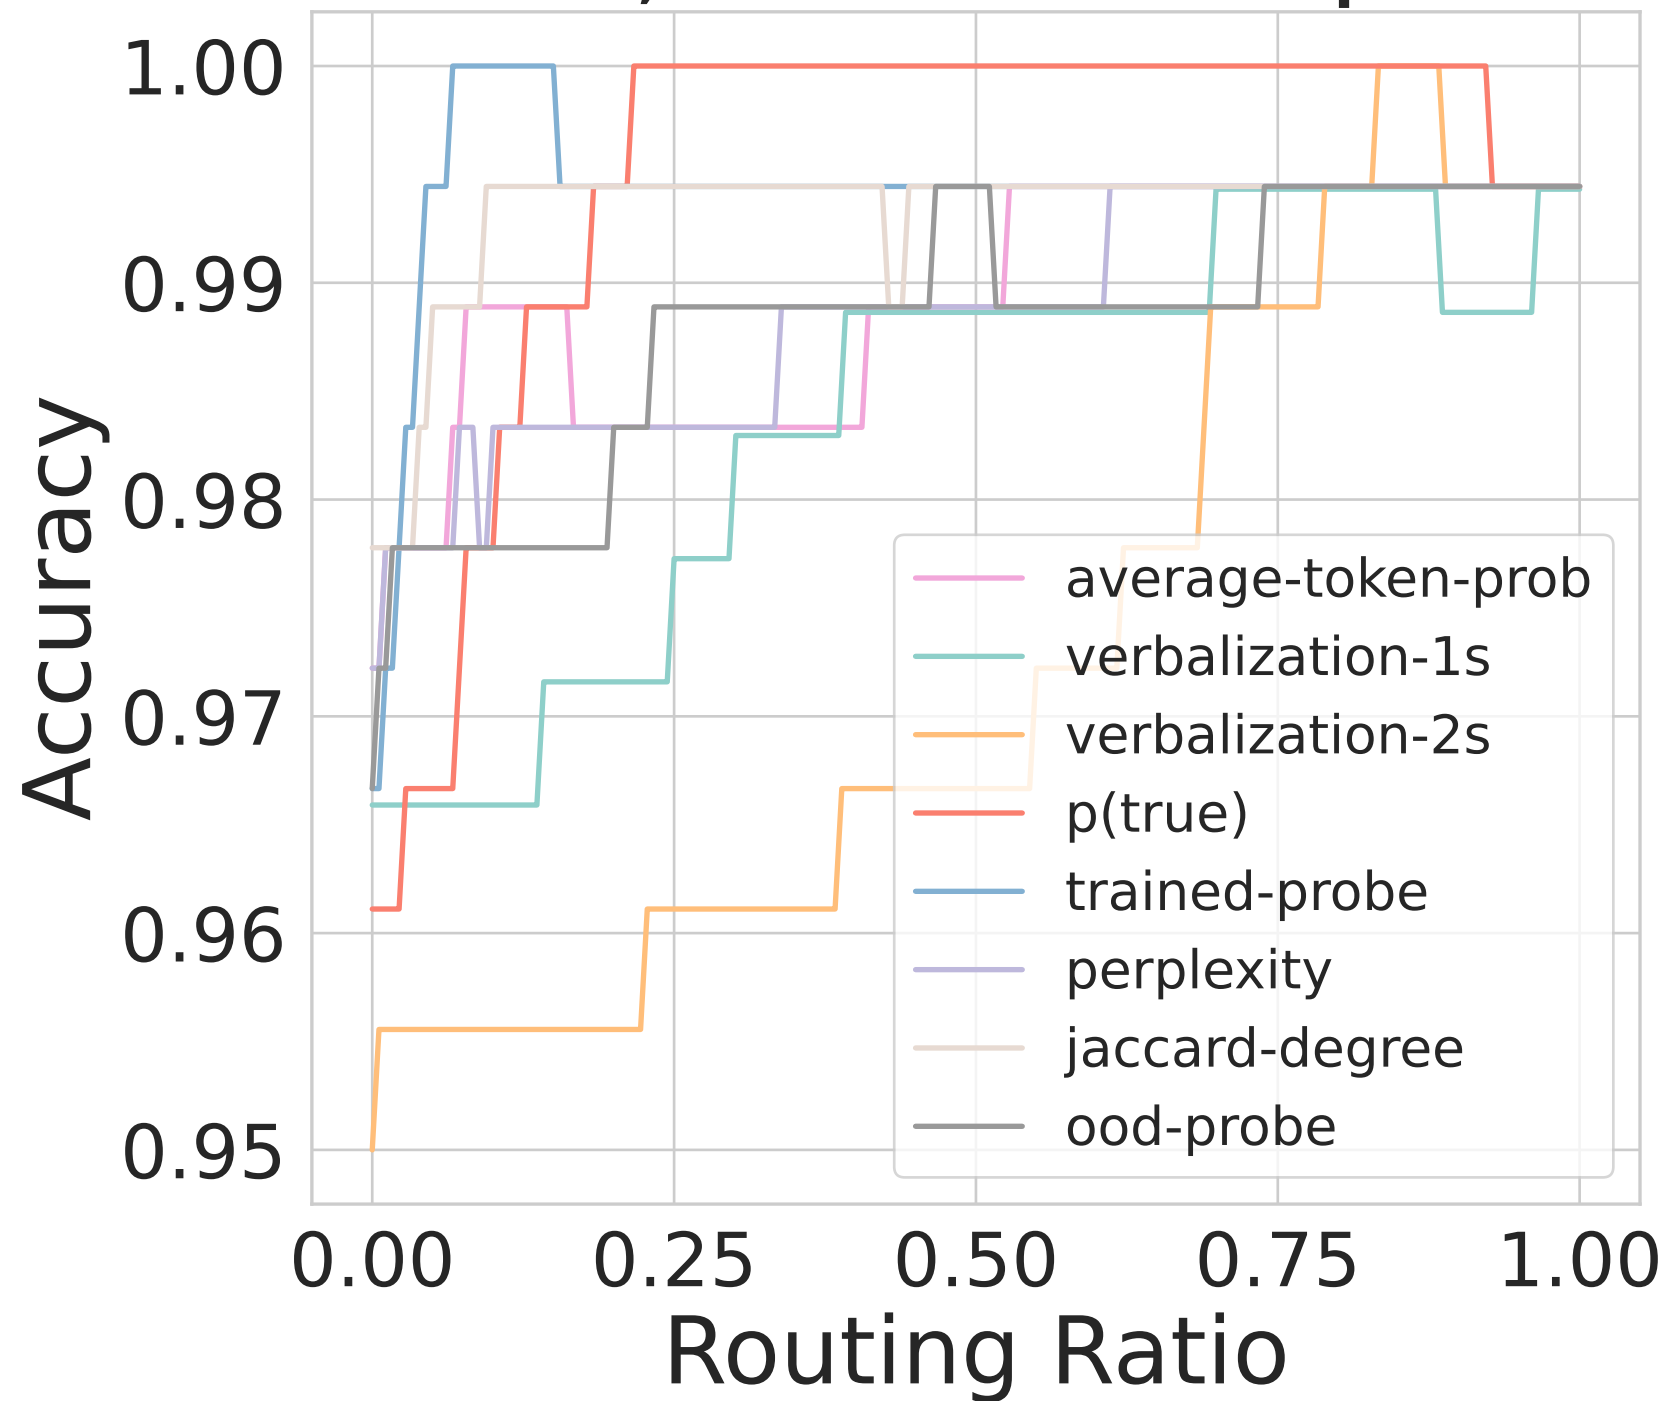

Supplement: supplementary_material [file rr_acc_multiarith_llama-3.1-8b_dsR1.pdf › Routing_SLM_LLMs/Uncertainty-based Routing/w_legend/to_dsR1/rr_acc_multiarith_llama-3.1-8b_dsR1.pdf]

# MultiArith, llama-3.2-1b to DeepSeek-R1

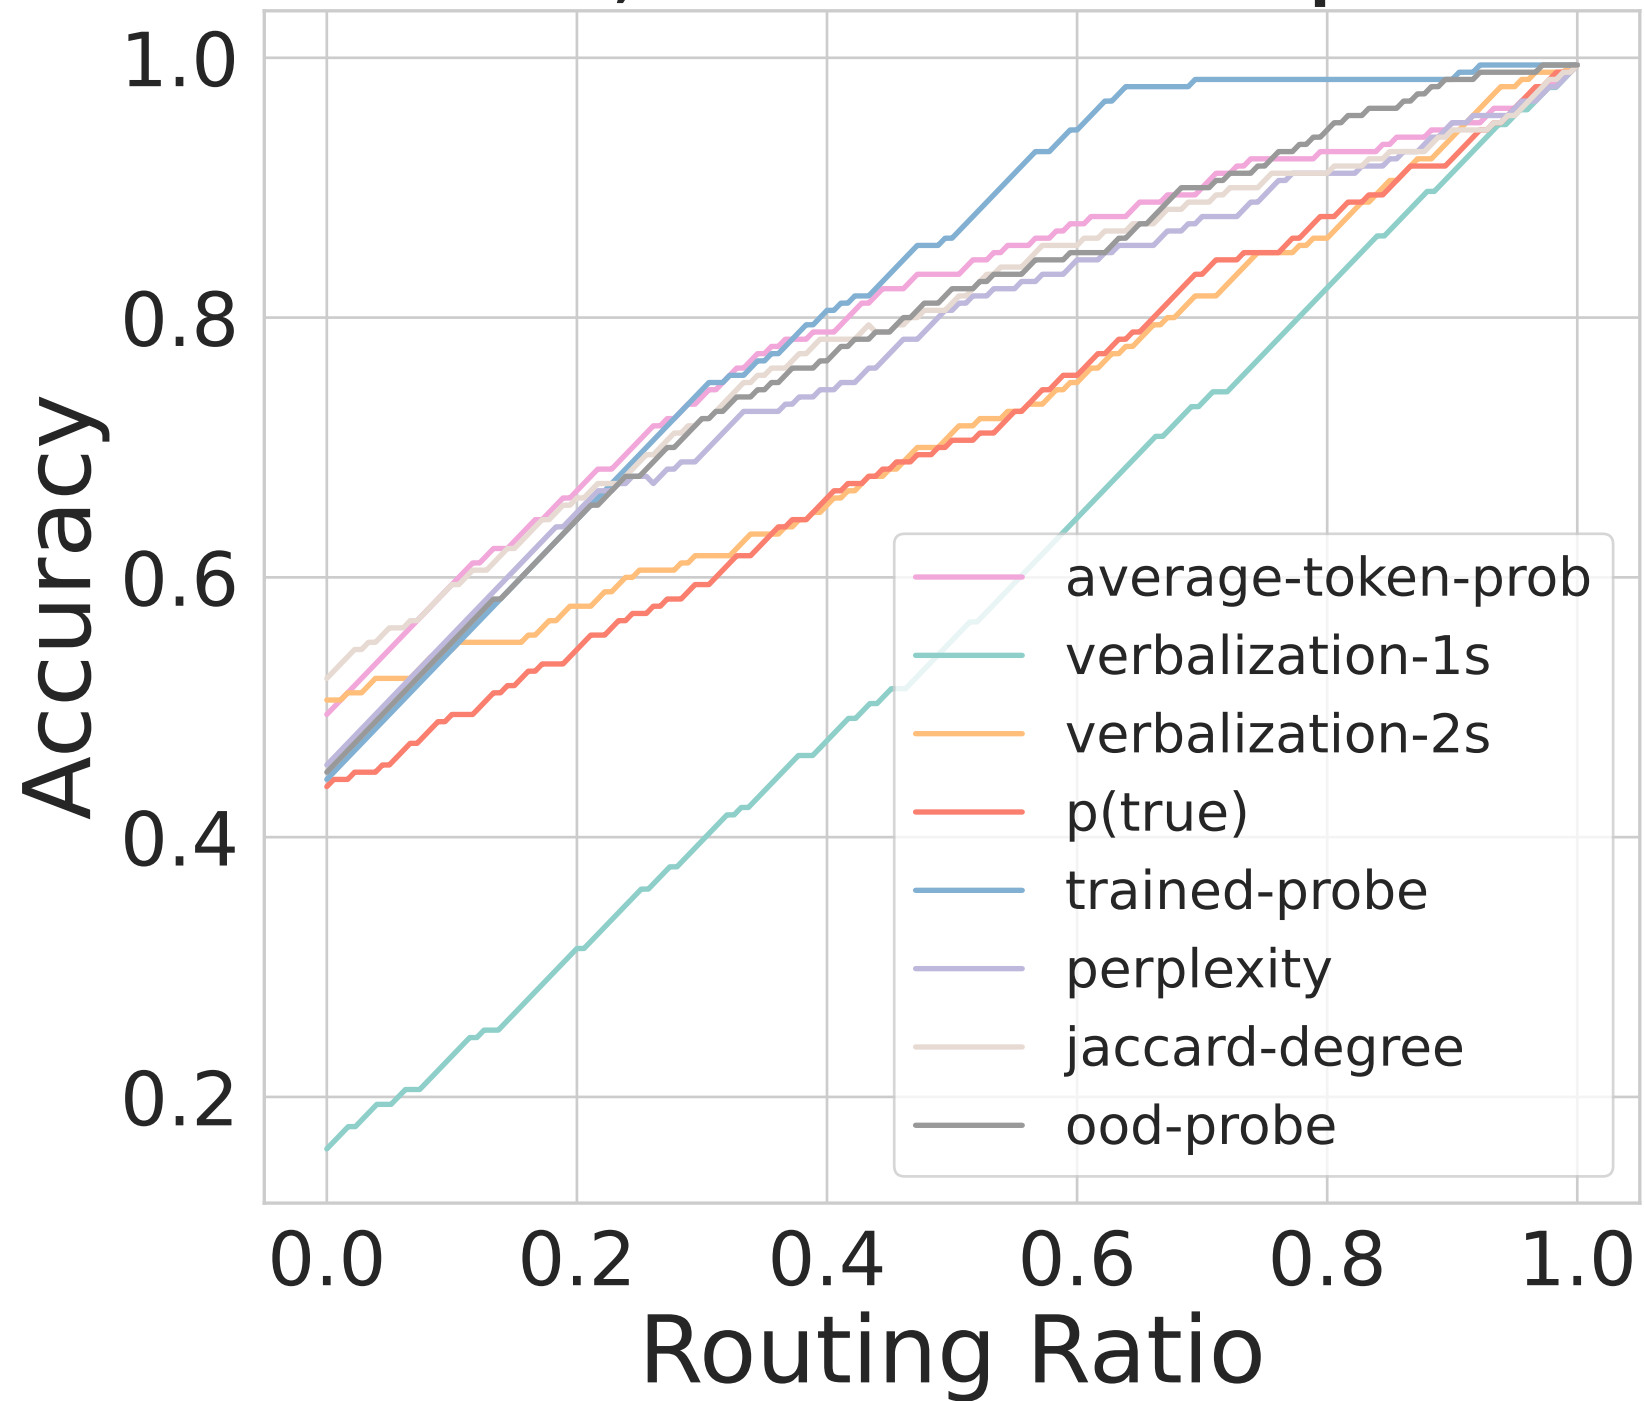

Supplement: supplementary_material [file rr_acc_multiarith_llama-3.2-1b_dsR1.pdf › Routing_SLM_LLMs/Uncertainty-based Routing/w_legend/to_dsR1/rr_acc_multiarith_llama-3.2-1b_dsR1.pdf]

# MultiArith, llama-3.2-3b to DeepSeek-R1

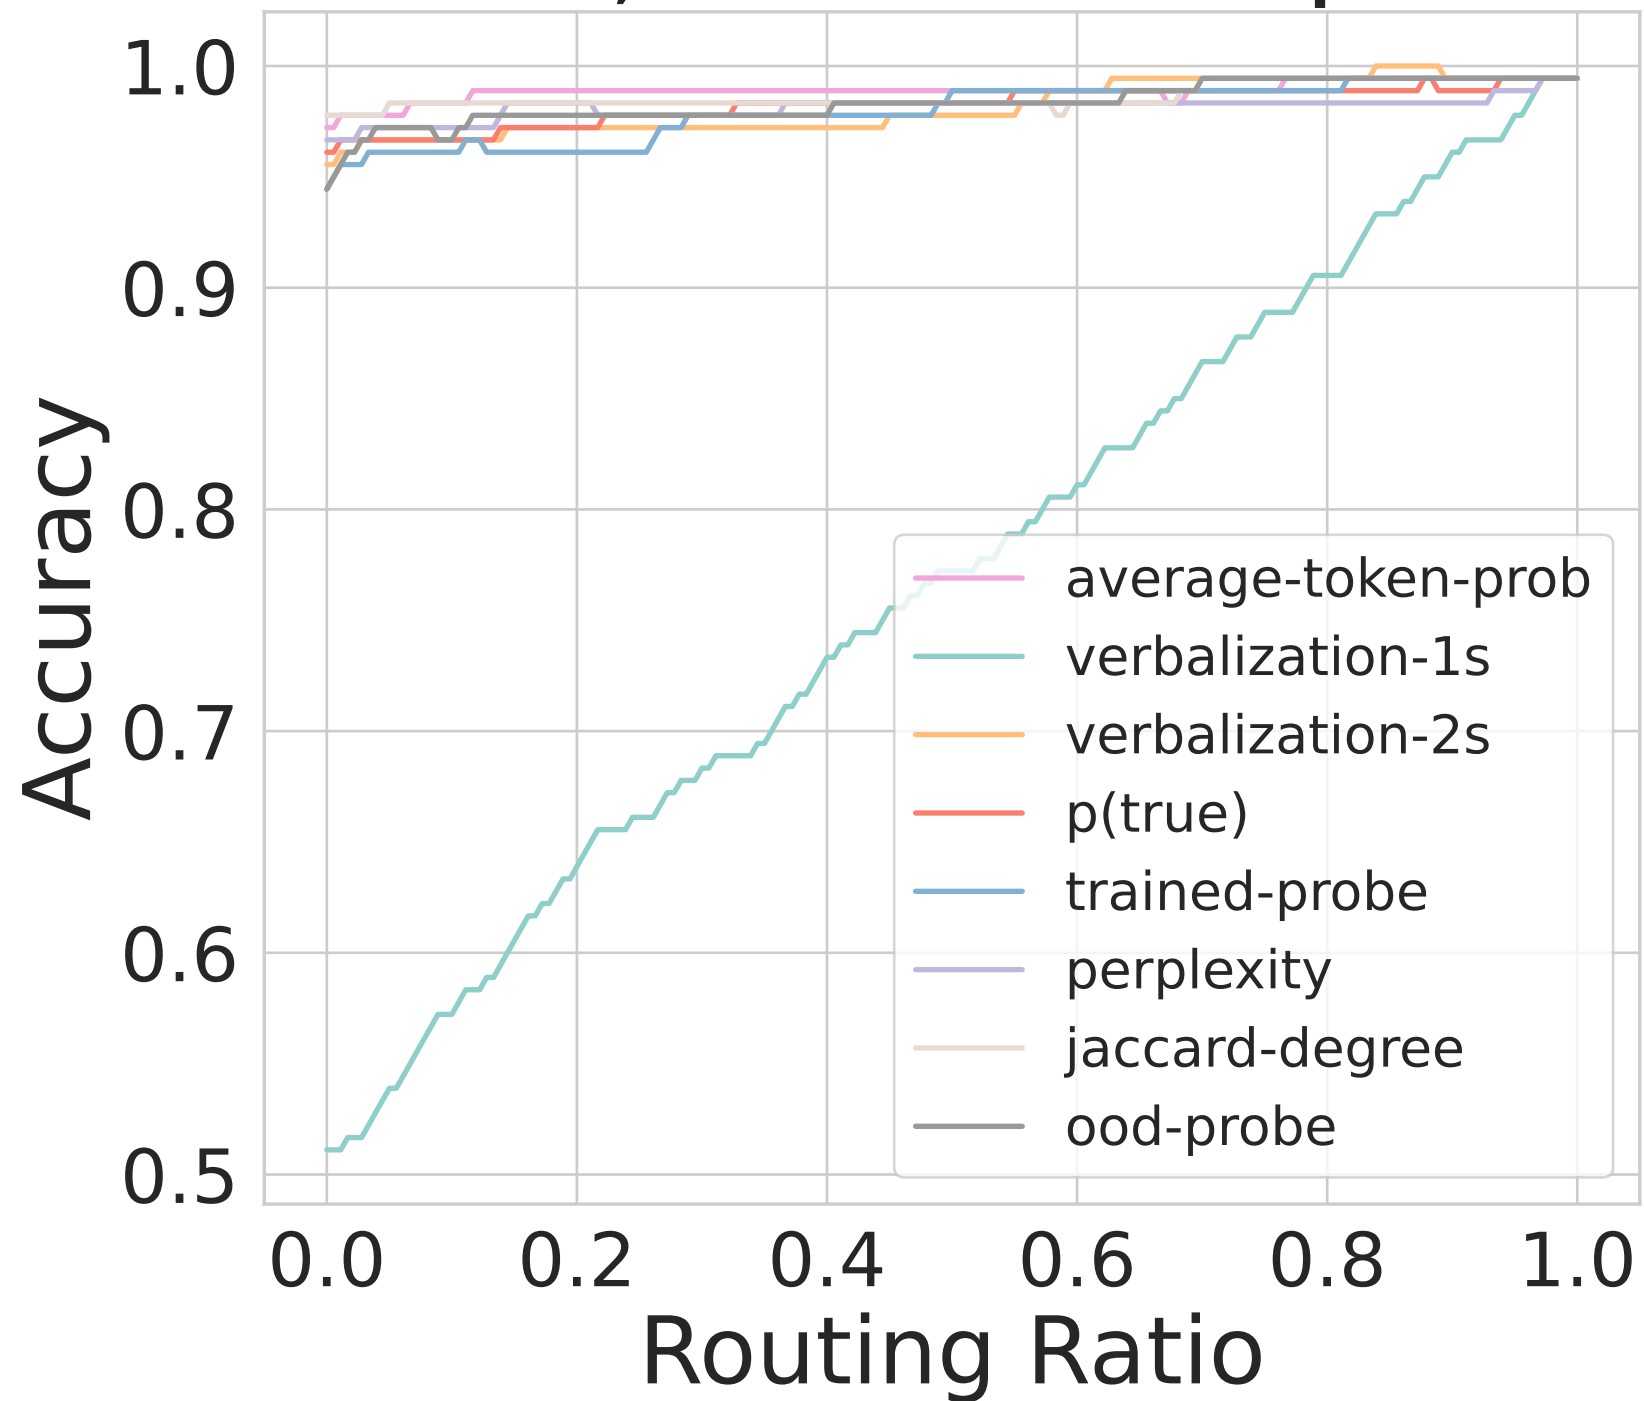

Supplement: supplementary_material [file rr_acc_multiarith_llama-3.2-3b_dsR1.pdf › Routing_SLM_LLMs/Uncertainty-based Routing/w_legend/to_dsR1/rr_acc_multiarith_llama-3.2-3b_dsR1.pdf]

# MultiArith, mistral-7b to DeepSeek-R1

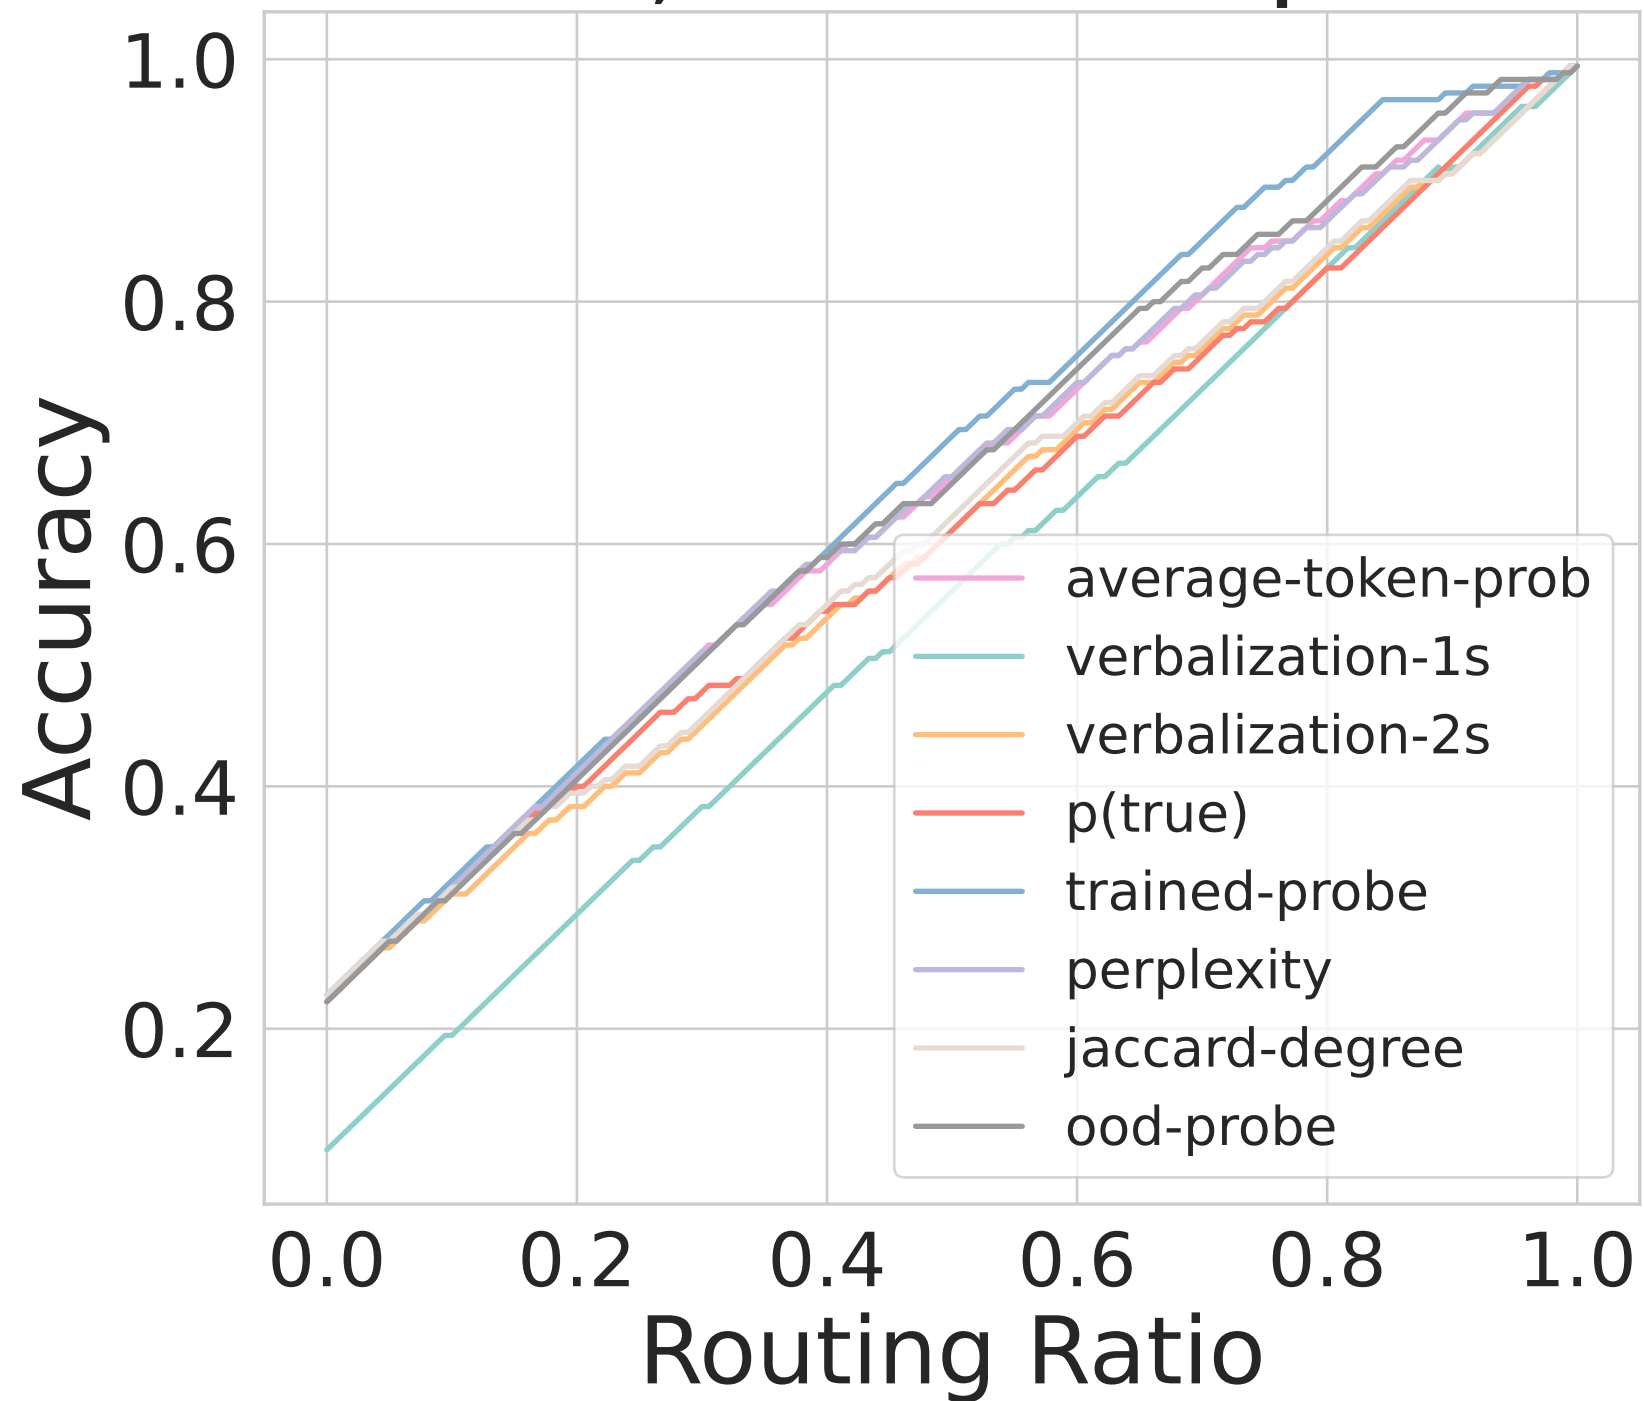

Supplement: supplementary_material [file rr_acc_multiarith_mistral-7b_dsR1.pdf › Routing_SLM_LLMs/Uncertainty-based Routing/w_legend/to_dsR1/rr_acc_multiarith_mistral-7b_dsR1.pdf]

# MultiArith, phi-3.5-mini to DeepSeek-R1

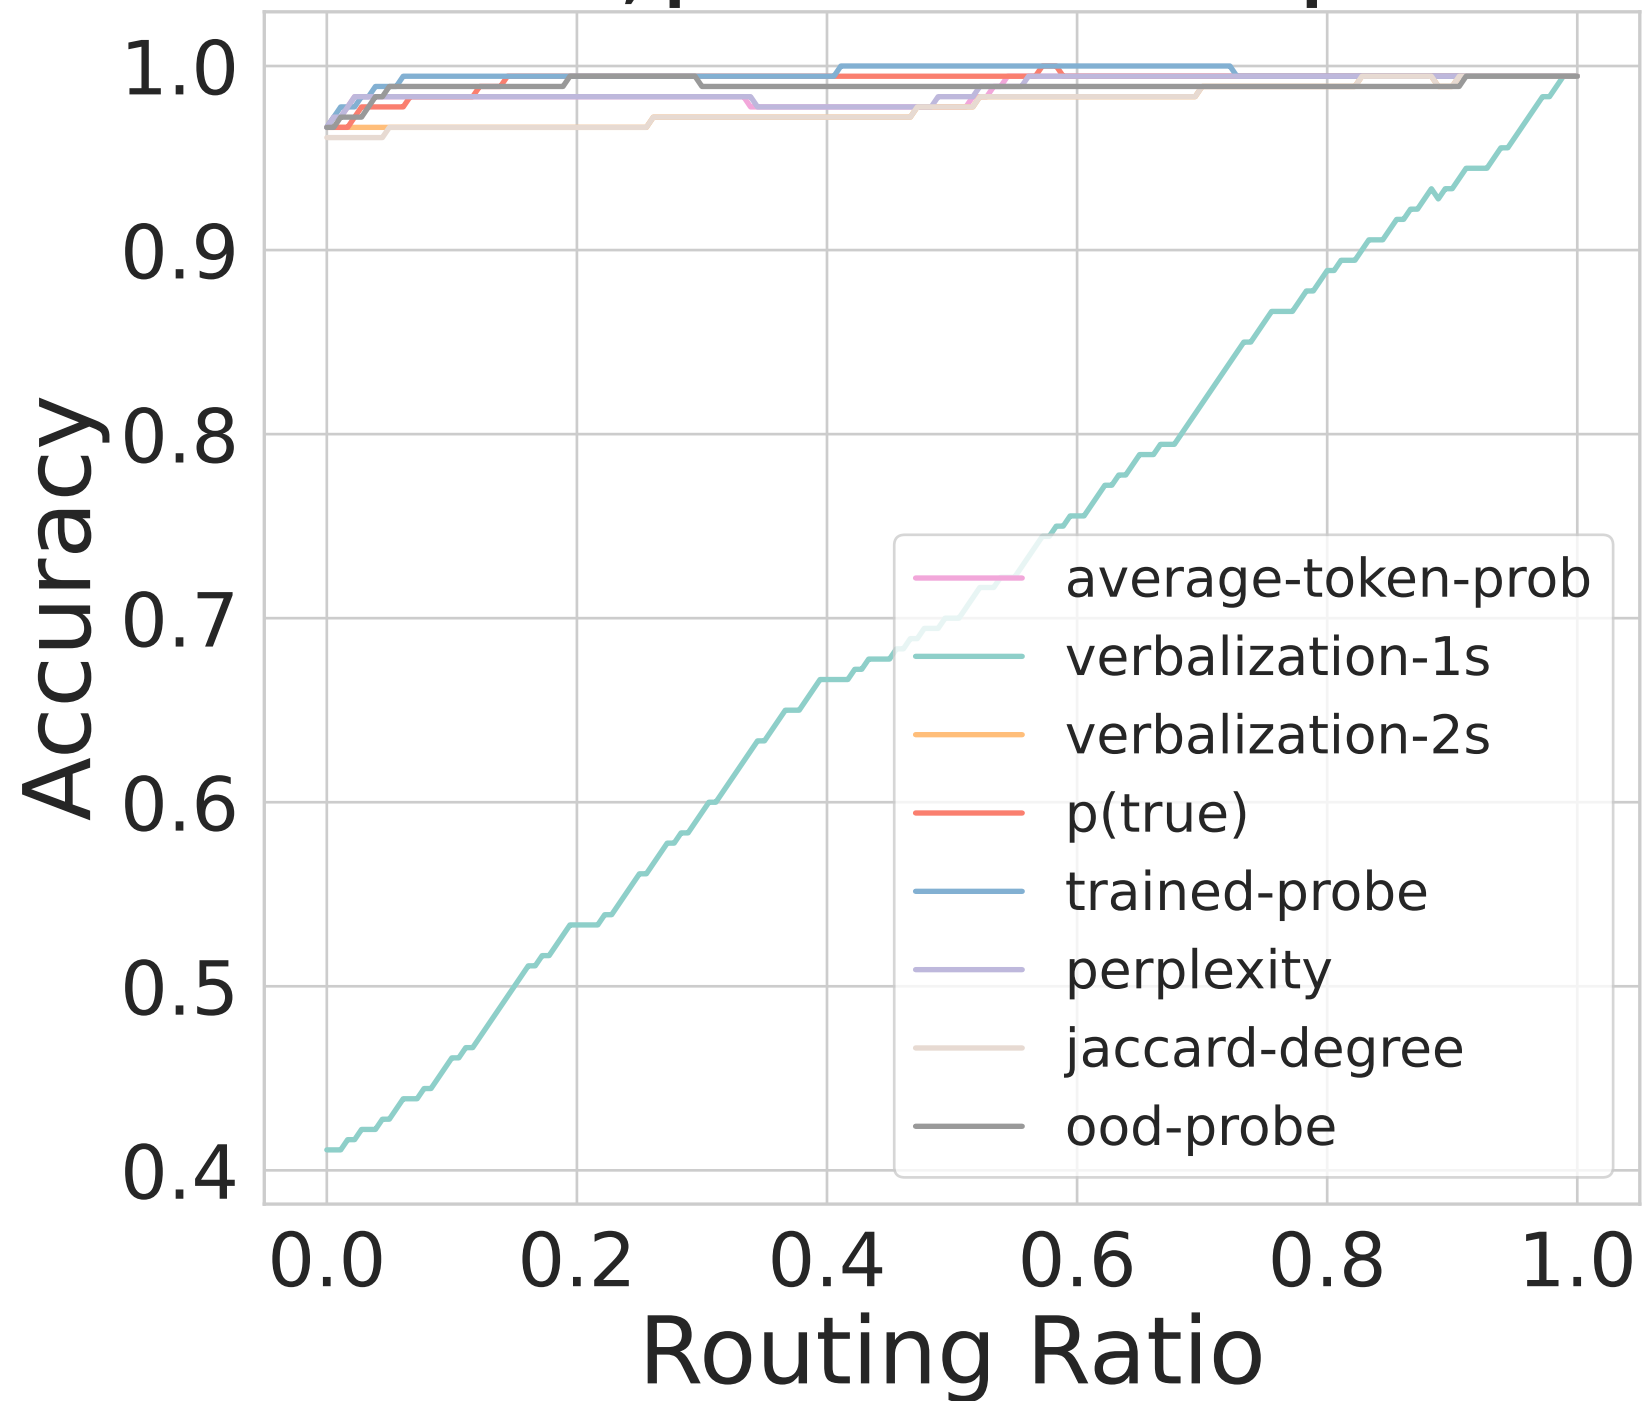

Supplement: supplementary_material [file rr_acc_multiarith_phi-3.5-mini_dsR1.pdf › Routing_SLM_LLMs/Uncertainty-based Routing/w_legend/to_dsR1/rr_acc_multiarith_phi-3.5-mini_dsR1.pdf]

# MultiArith, phi-4-mini-reasoning to DeepSeek-R1

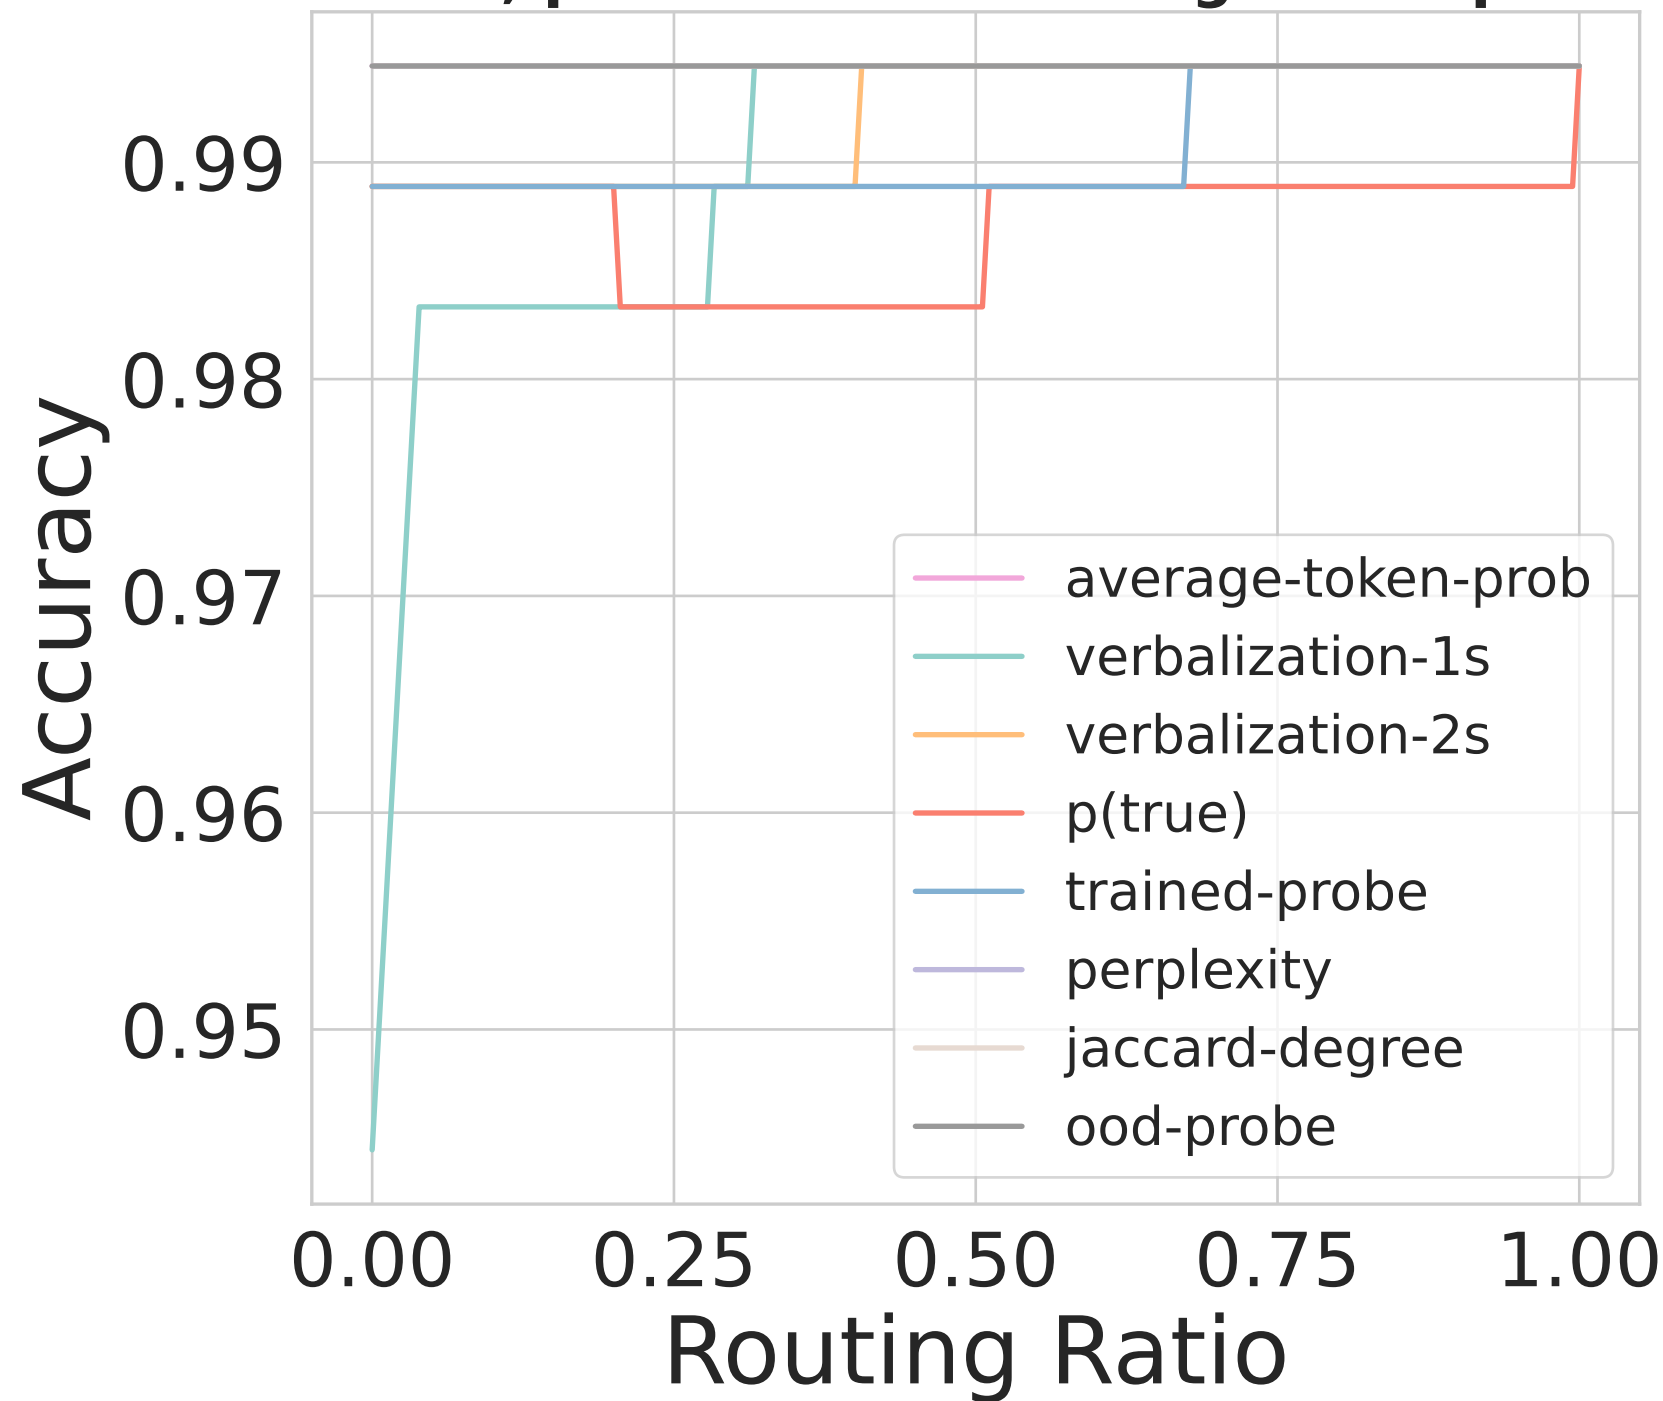

Supplement: supplementary_material [file rr_acc_multiarith_phi-4-mini-reasoning_dsR1.pdf › Routing_SLM_LLMs/Uncertainty-based Routing/w_legend/to_dsR1/rr_acc_multiarith_phi-4-mini-reasoning_dsR1.pdf]

# MultiArith, qwen-2.5-7b to DeepSeek-R1

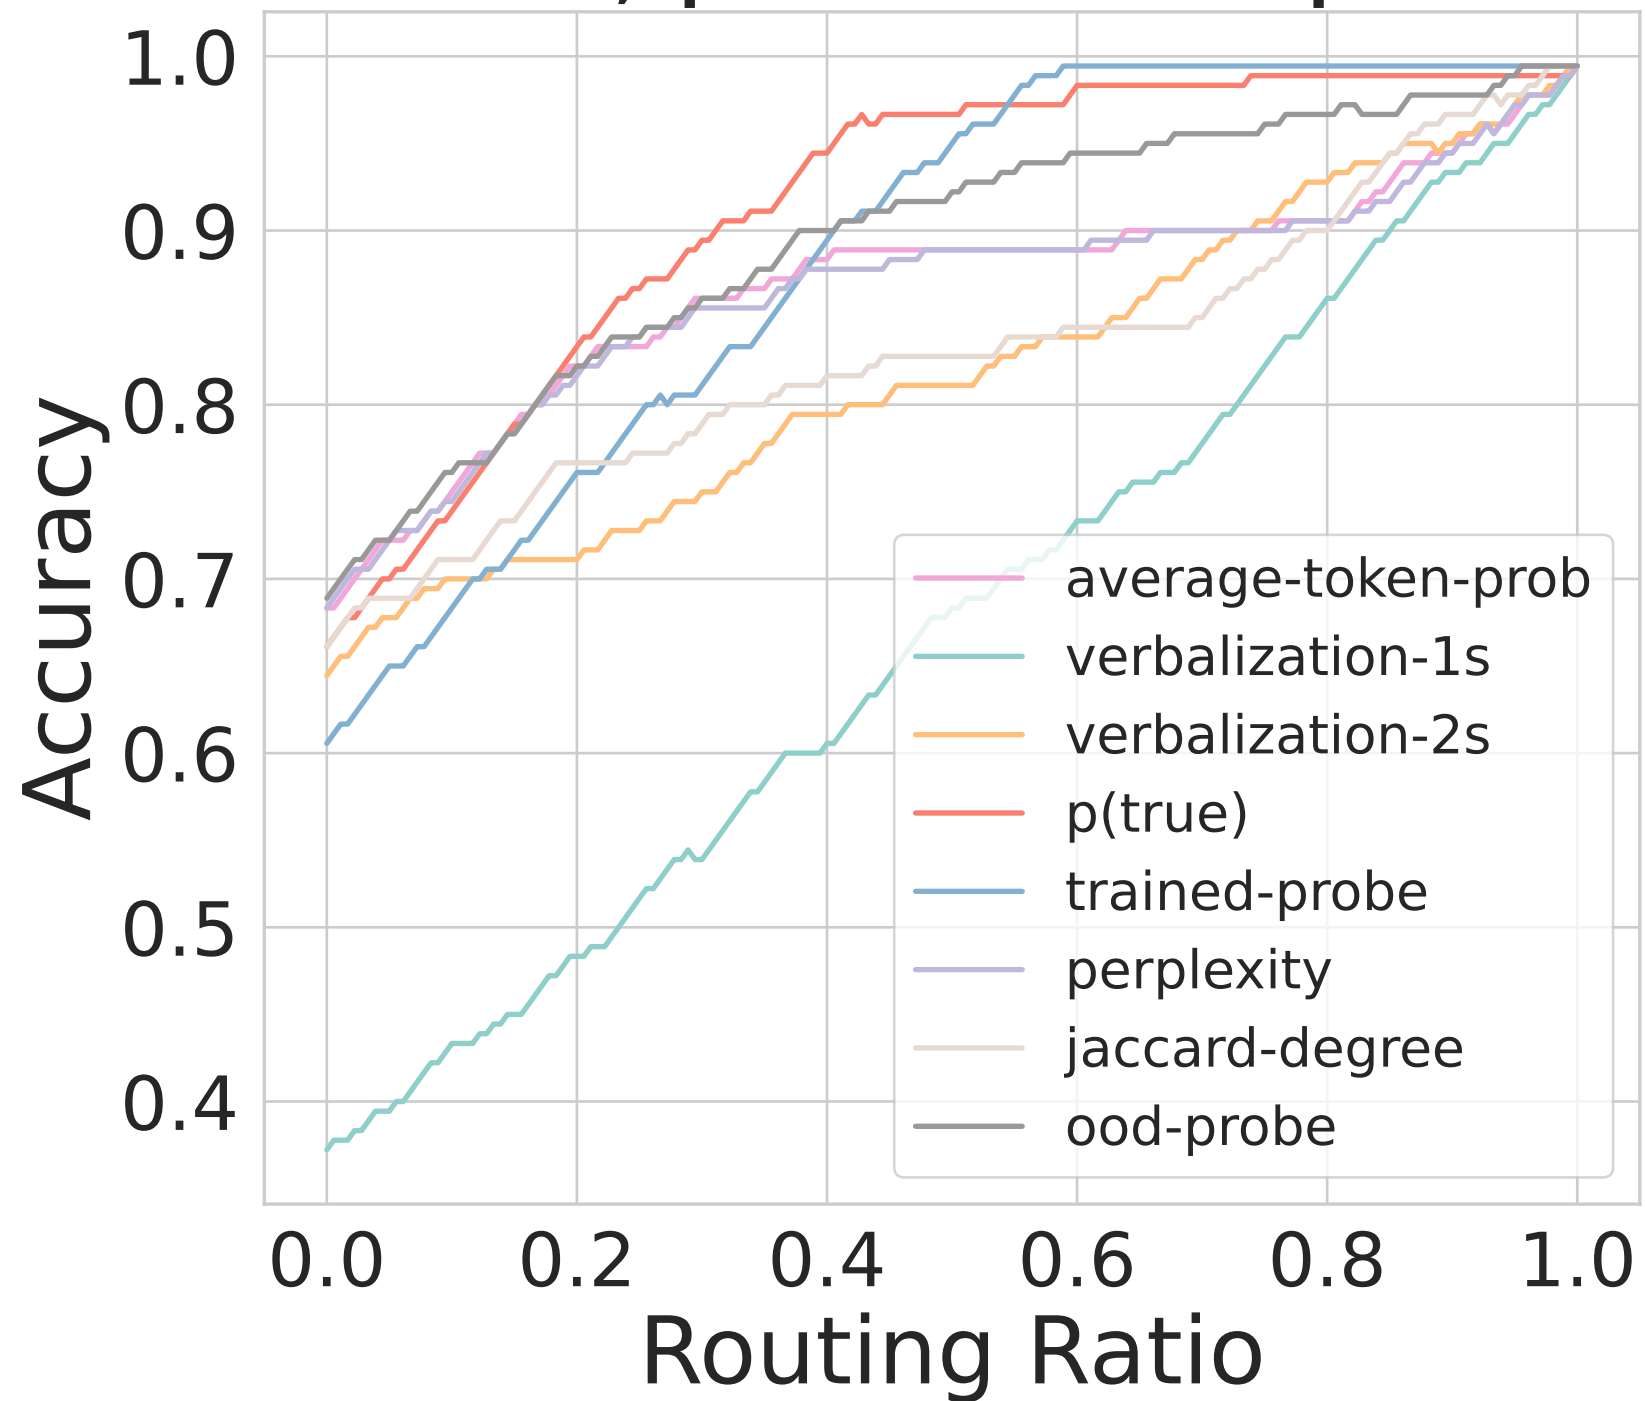

Supplement: supplementary_material [file rr_acc_multiarith_qwen-2.5-7b_dsR1.pdf › Routing_SLM_LLMs/Uncertainty-based Routing/w_legend/to_dsR1/rr_acc_multiarith_qwen-2.5-7b_dsR1.pdf]

# MultiArith, rwkv to DeepSeek-R1

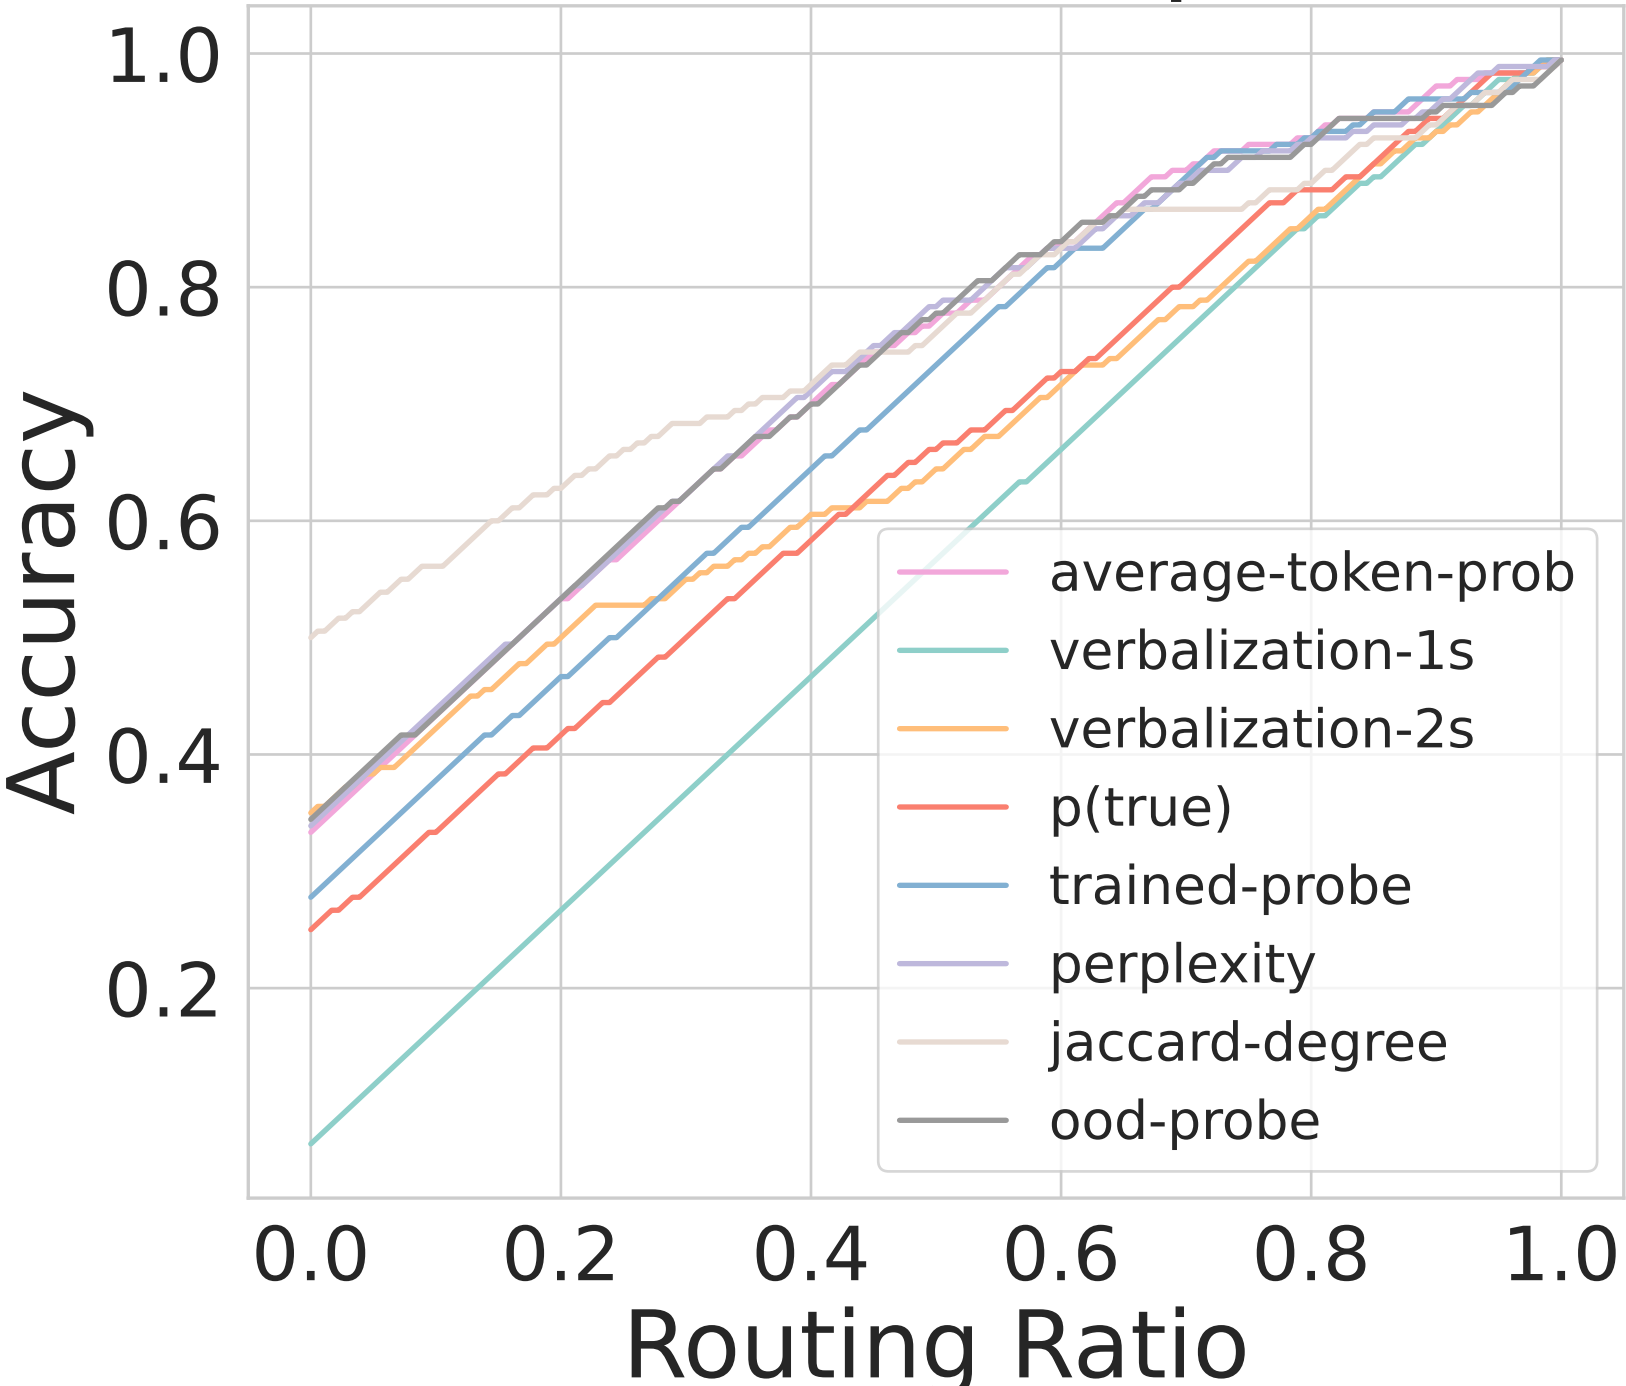

Supplement: supplementary_material [file rr_acc_multiarith_rwkv_dsR1.pdf › Routing_SLM_LLMs/Uncertainty-based Routing/w_legend/to_dsR1/rr_acc_multiarith_rwkv_dsR1.pdf]

# OpenBookQA, Qwen3-0.6B to DeepSeek-R1

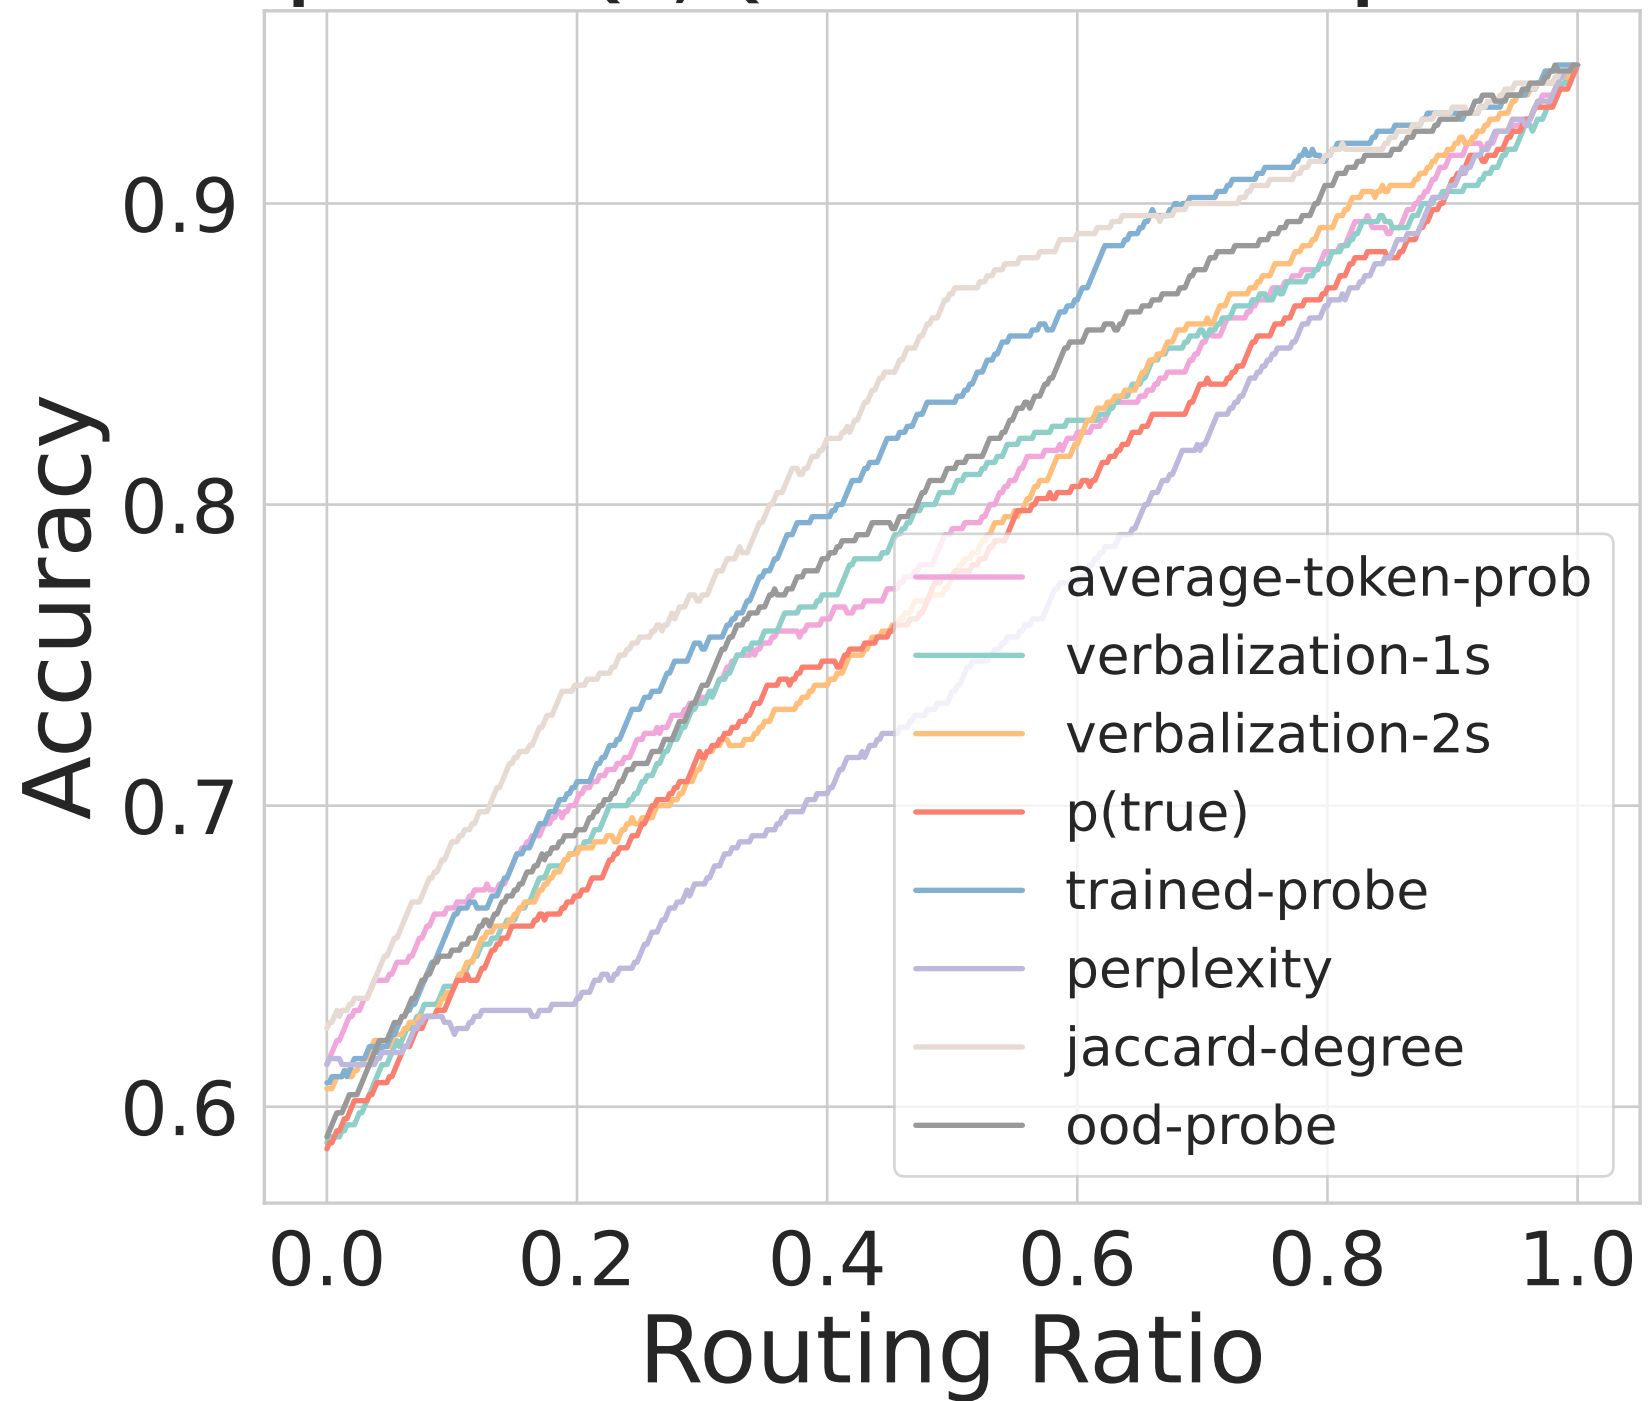

Supplement: supplementary_material [file rr_acc_openbook_qa_Qwen3-0.6B_dsR1.pdf › Routing_SLM_LLMs/Uncertainty-based Routing/w_legend/to_dsR1/rr_acc_openbook_qa_Qwen3-0.6B_dsR1.pdf]

# OpenBookQA, Qwen3-1.7B to DeepSeek-R1

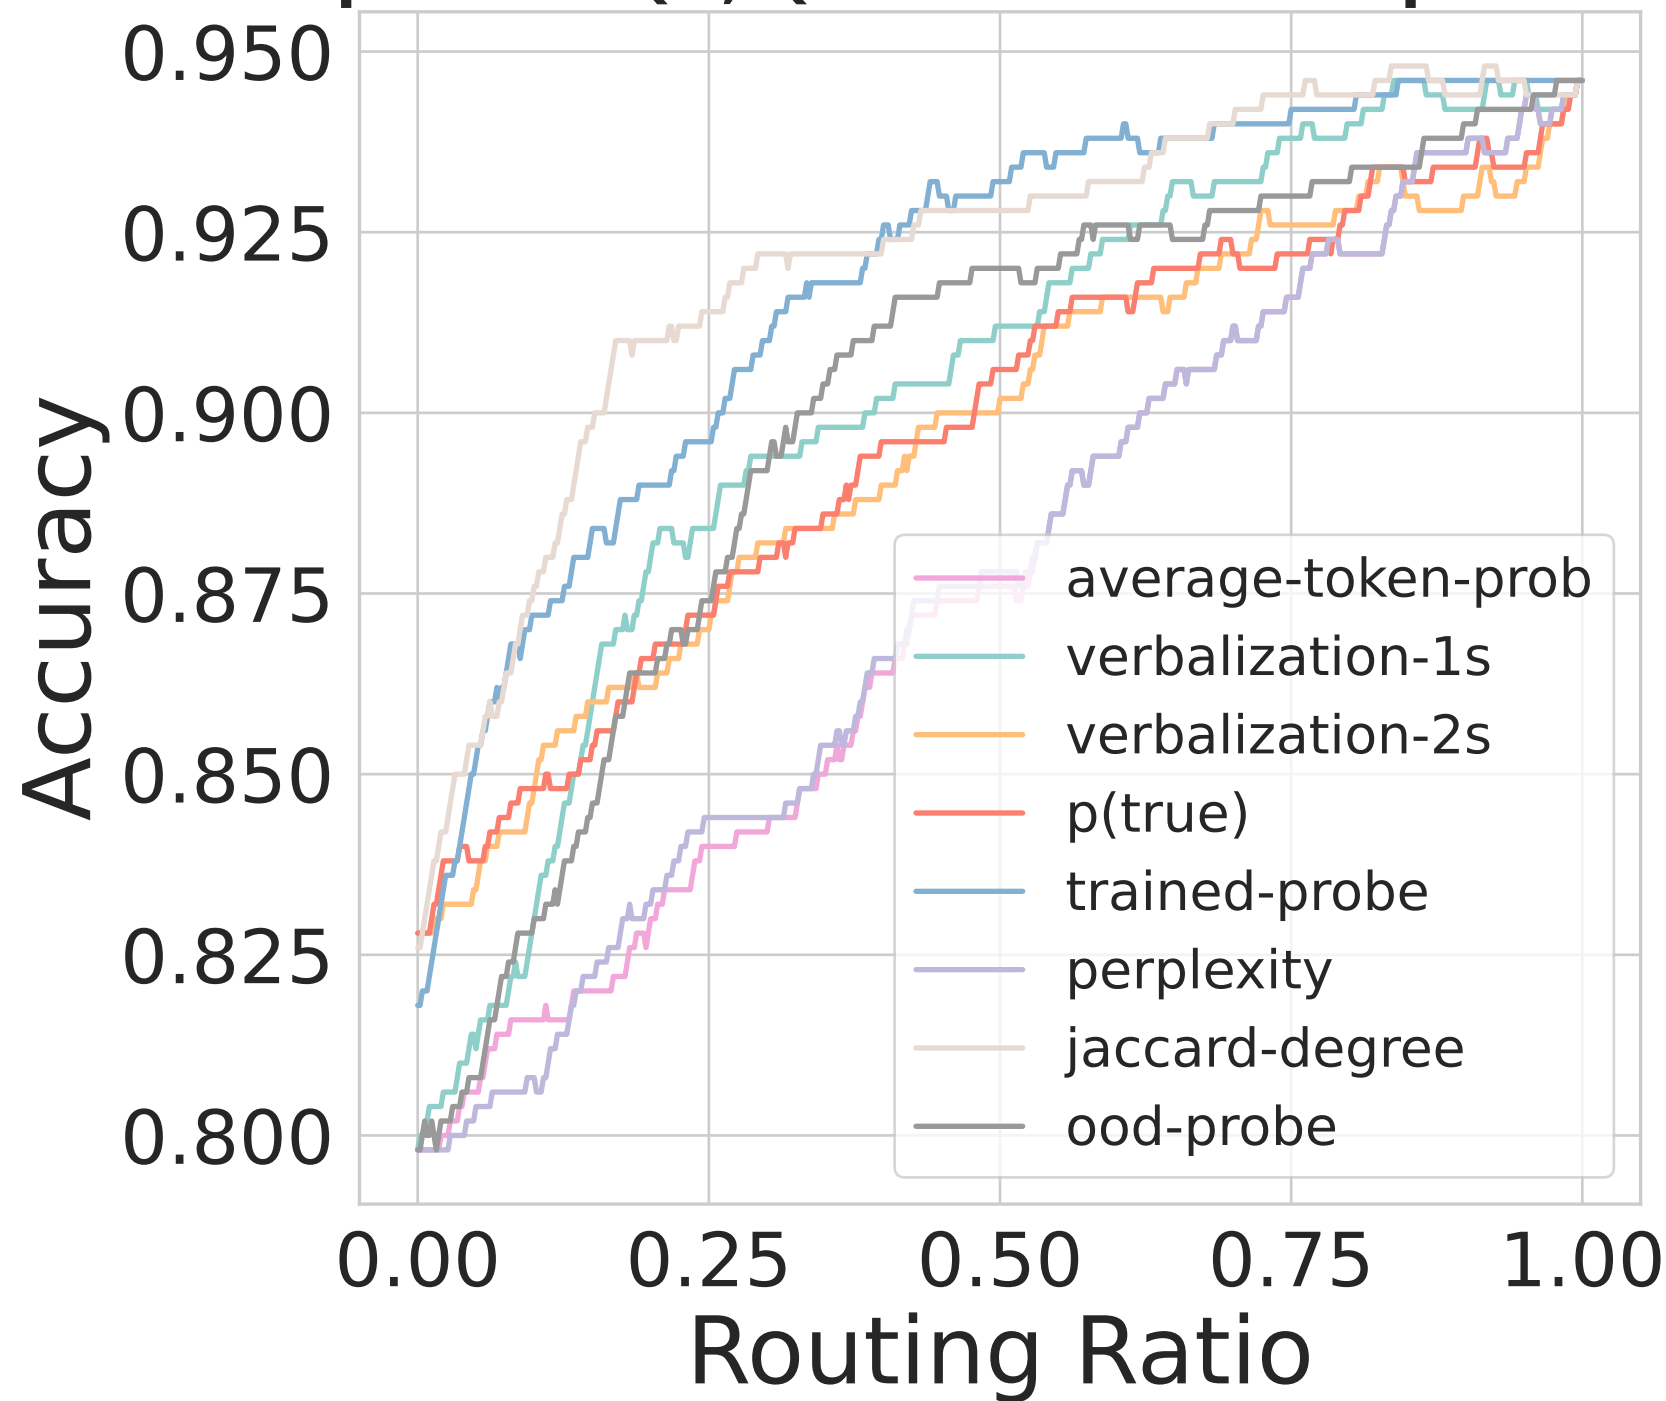

Supplement: supplementary_material [file rr_acc_openbook_qa_Qwen3-1.7B_dsR1.pdf › Routing_SLM_LLMs/Uncertainty-based Routing/w_legend/to_dsR1/rr_acc_openbook_qa_Qwen3-1.7B_dsR1.pdf]

OpenBookQA, Qwen3-4B to DeepSeek-R1

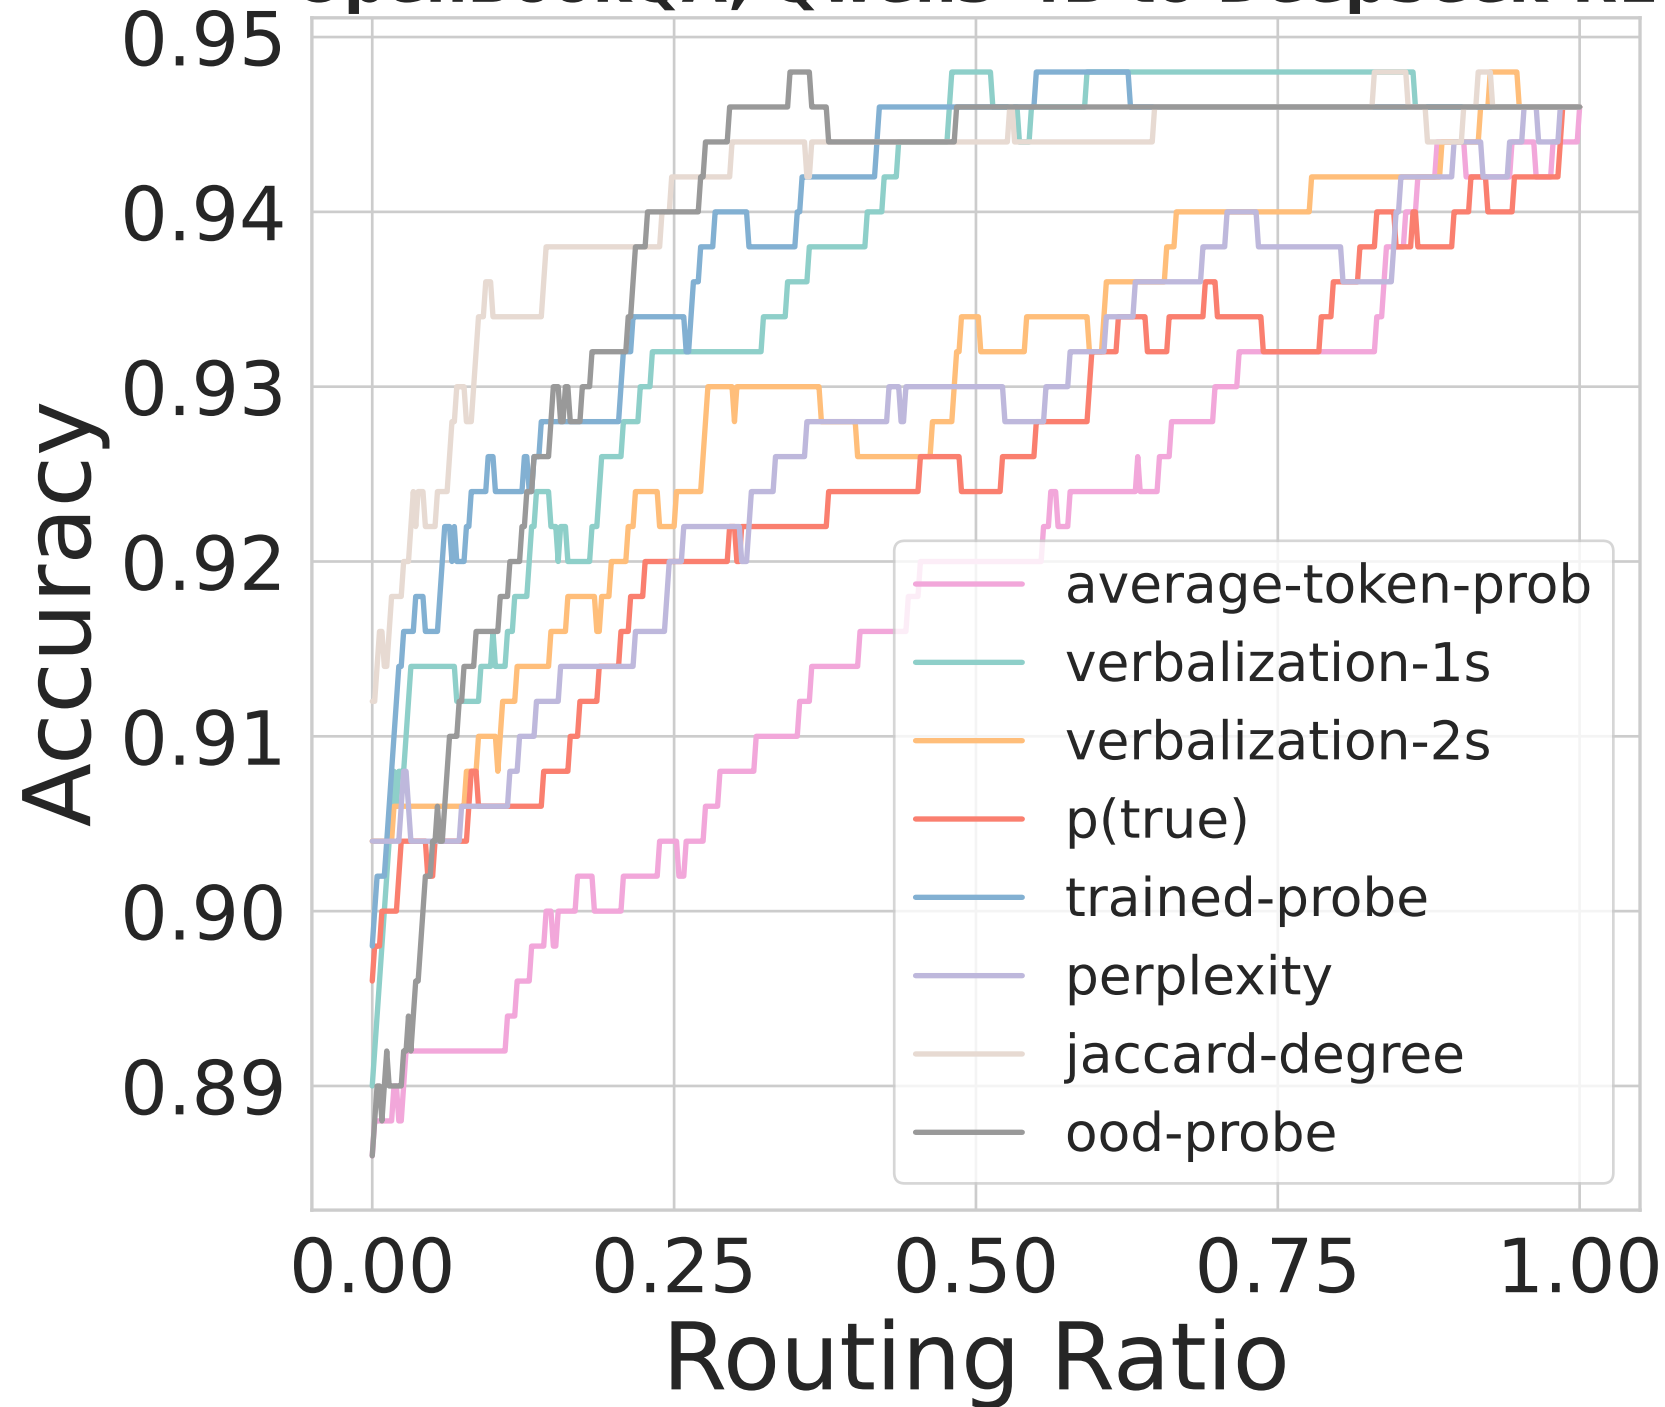

Supplement: supplementary_material [file rr_acc_openbook_qa_Qwen3-4B_dsR1.pdf › Routing_SLM_LLMs/Uncertainty-based Routing/w_legend/to_dsR1/rr_acc_openbook_qa_Qwen3-4B_dsR1.pdf]

# OpenBookQA, granite-3.1-8b to DeepSeek-R1

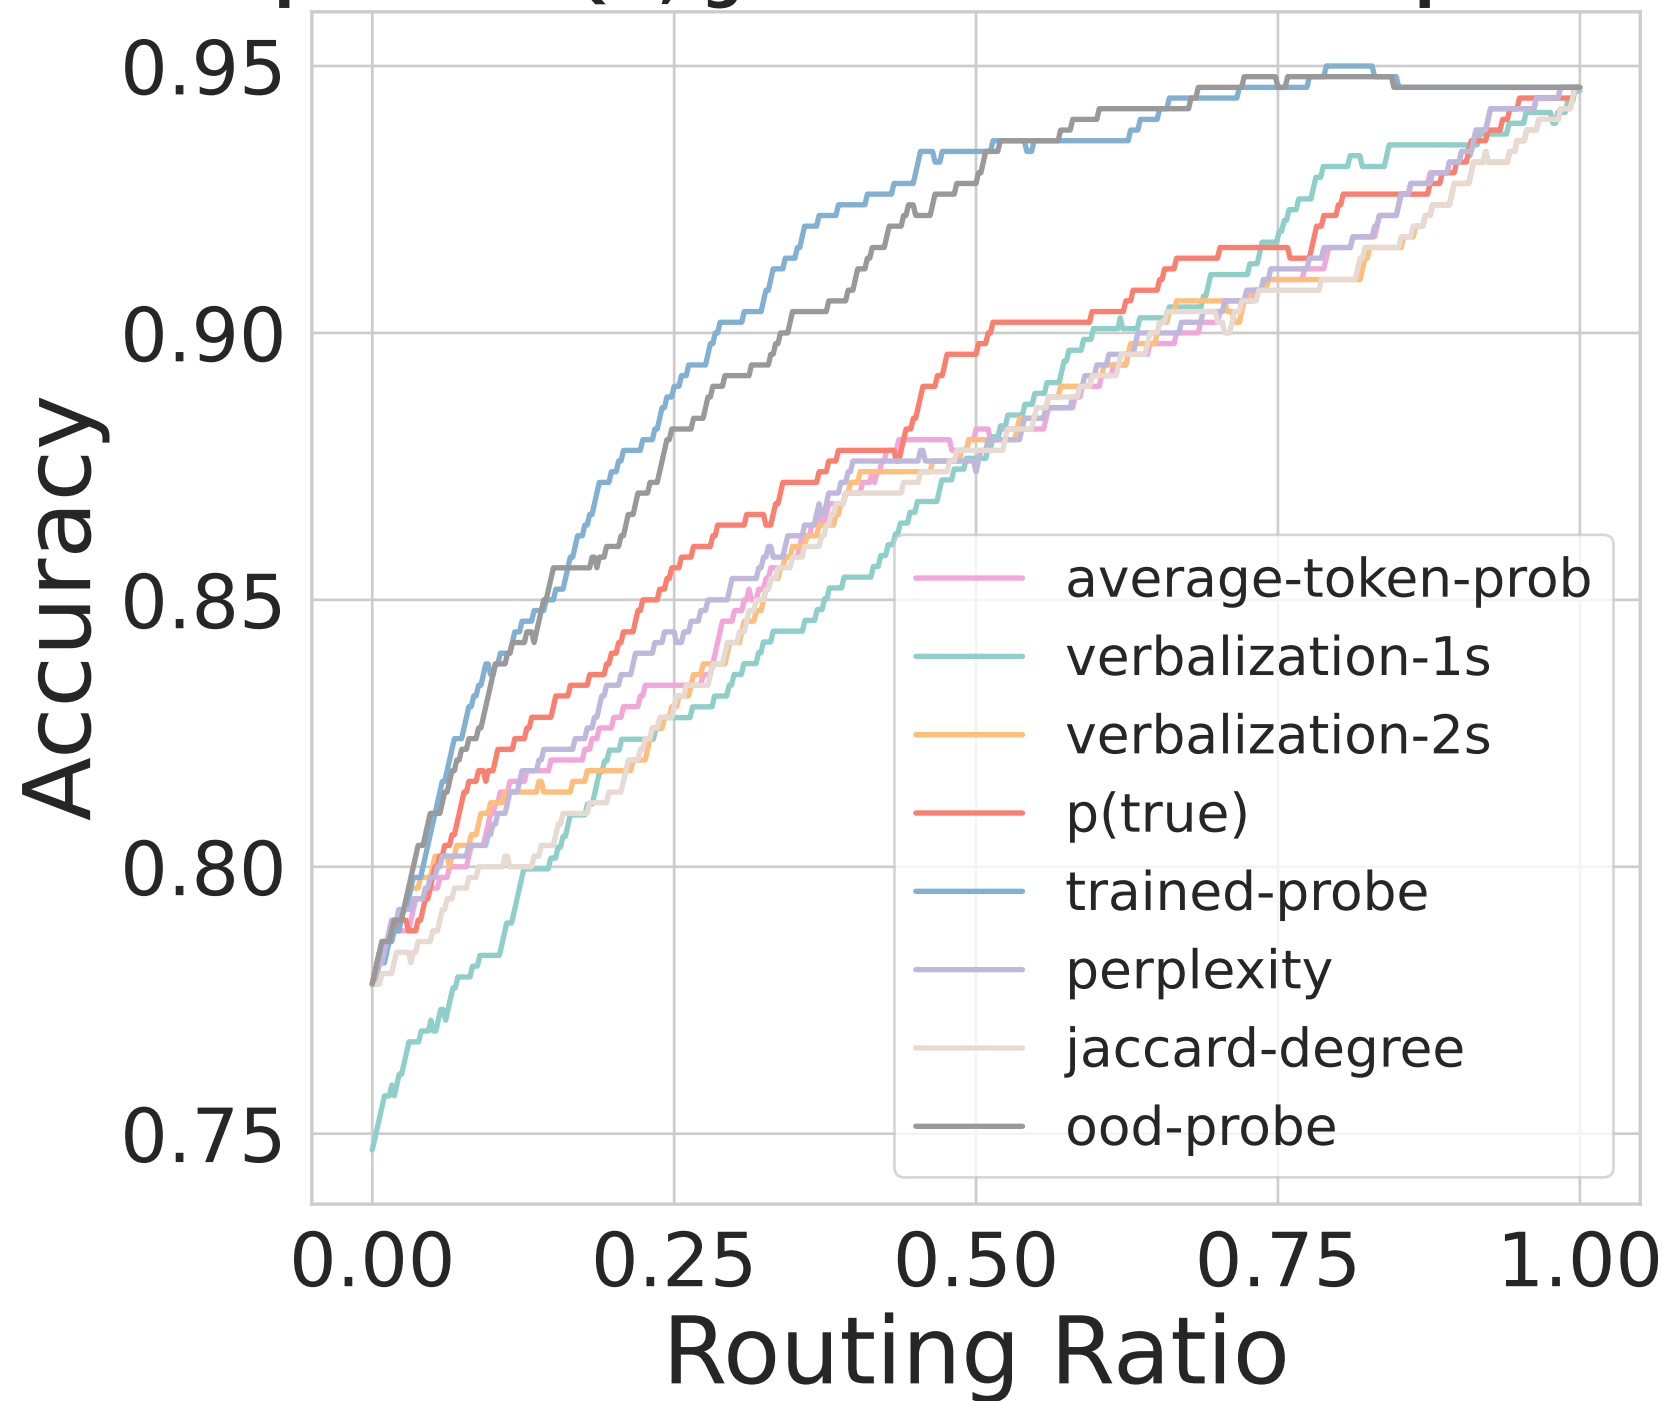

Supplement: supplementary_material [file rr_acc_openbook_qa_granite-3.1-8b_dsR1.pdf › Routing_SLM_LLMs/Uncertainty-based Routing/w_legend/to_dsR1/rr_acc_openbook_qa_granite-3.1-8b_dsR1.pdf]

# OpenBookQA, llama-3.1-8b to DeepSeek-R1

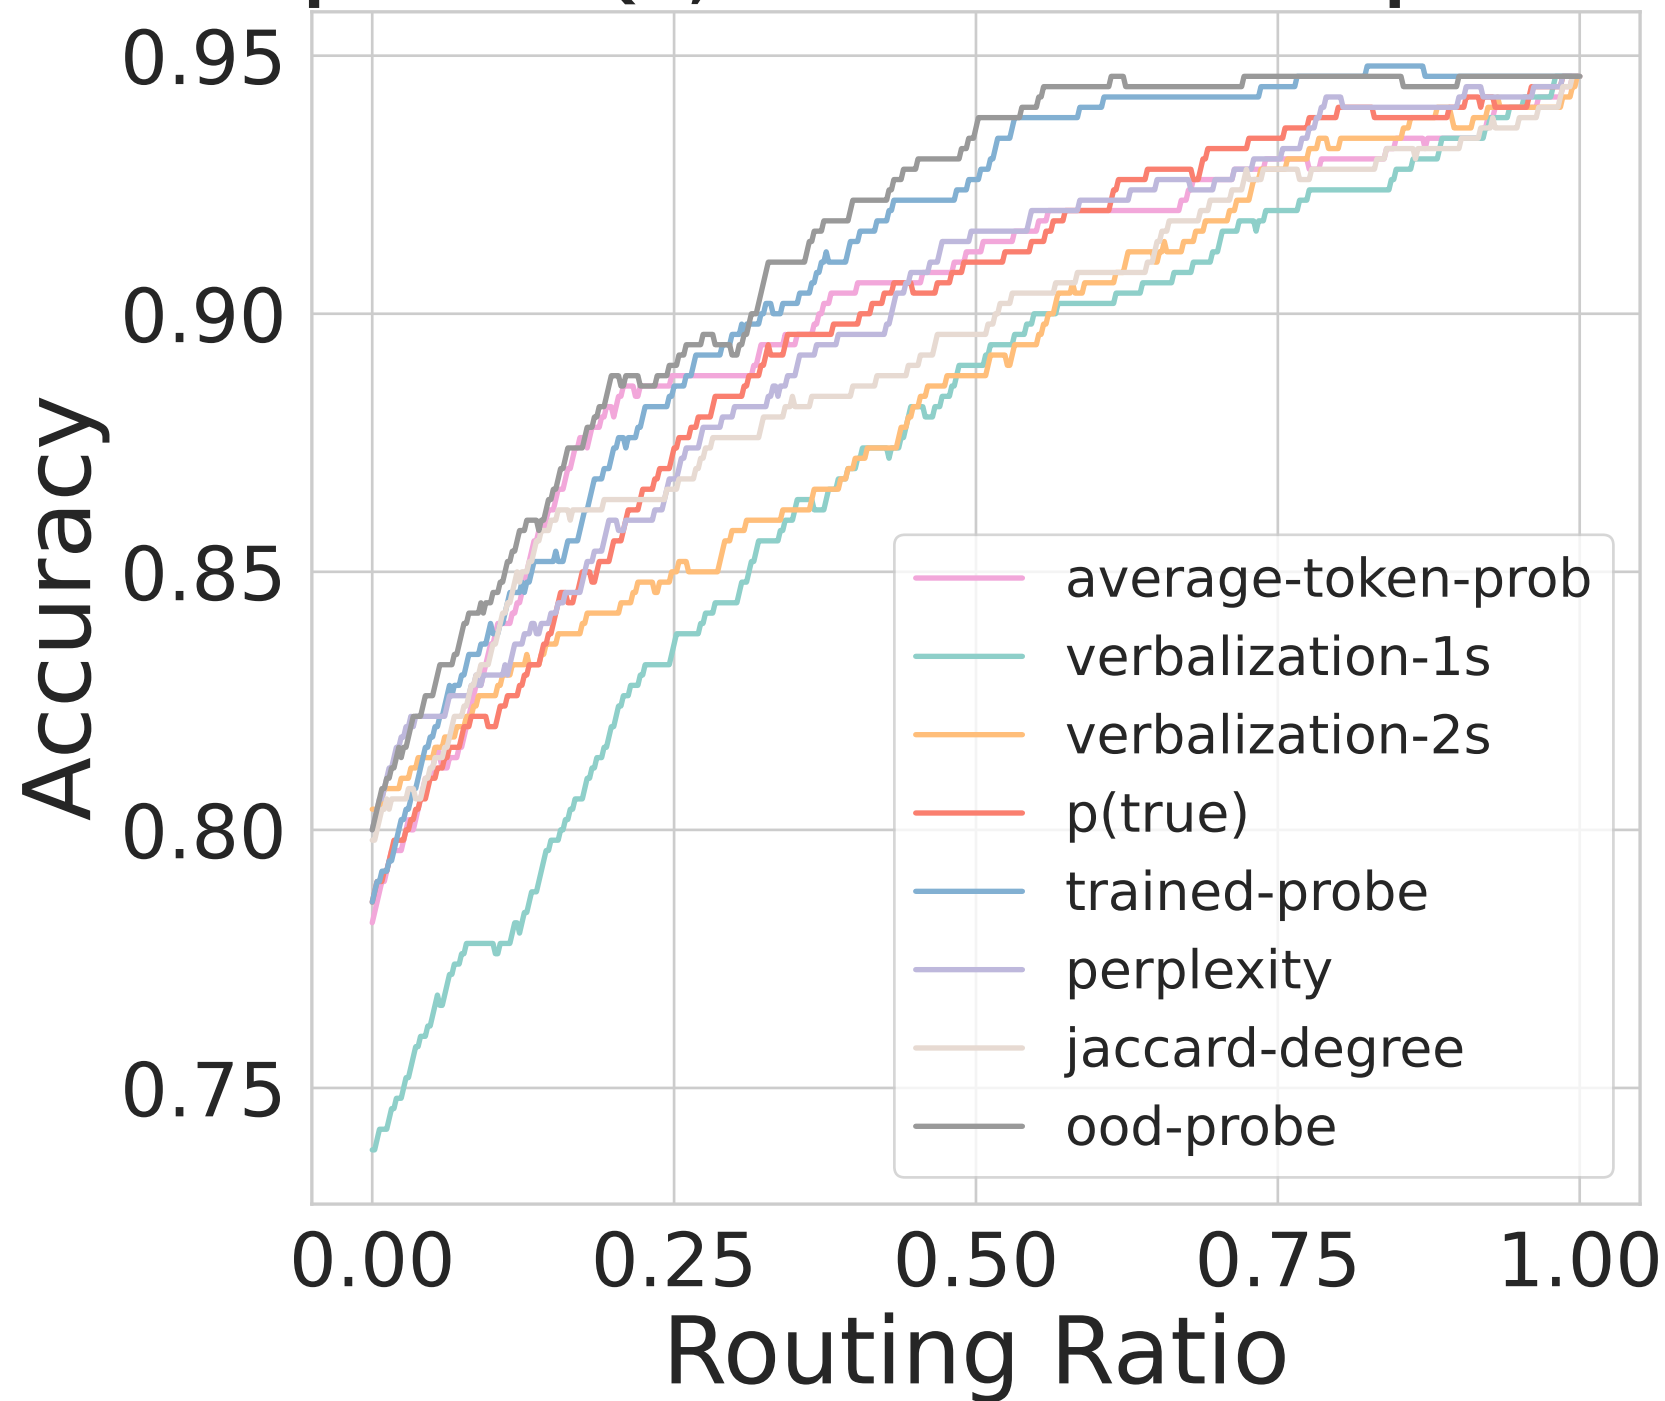

Supplement: supplementary_material [file rr_acc_openbook_qa_llama-3.1-8b_dsR1.pdf › Routing_SLM_LLMs/Uncertainty-based Routing/w_legend/to_dsR1/rr_acc_openbook_qa_llama-3.1-8b_dsR1.pdf]

# OpenBookQA, llama-3.2-1b to DeepSeek-R1

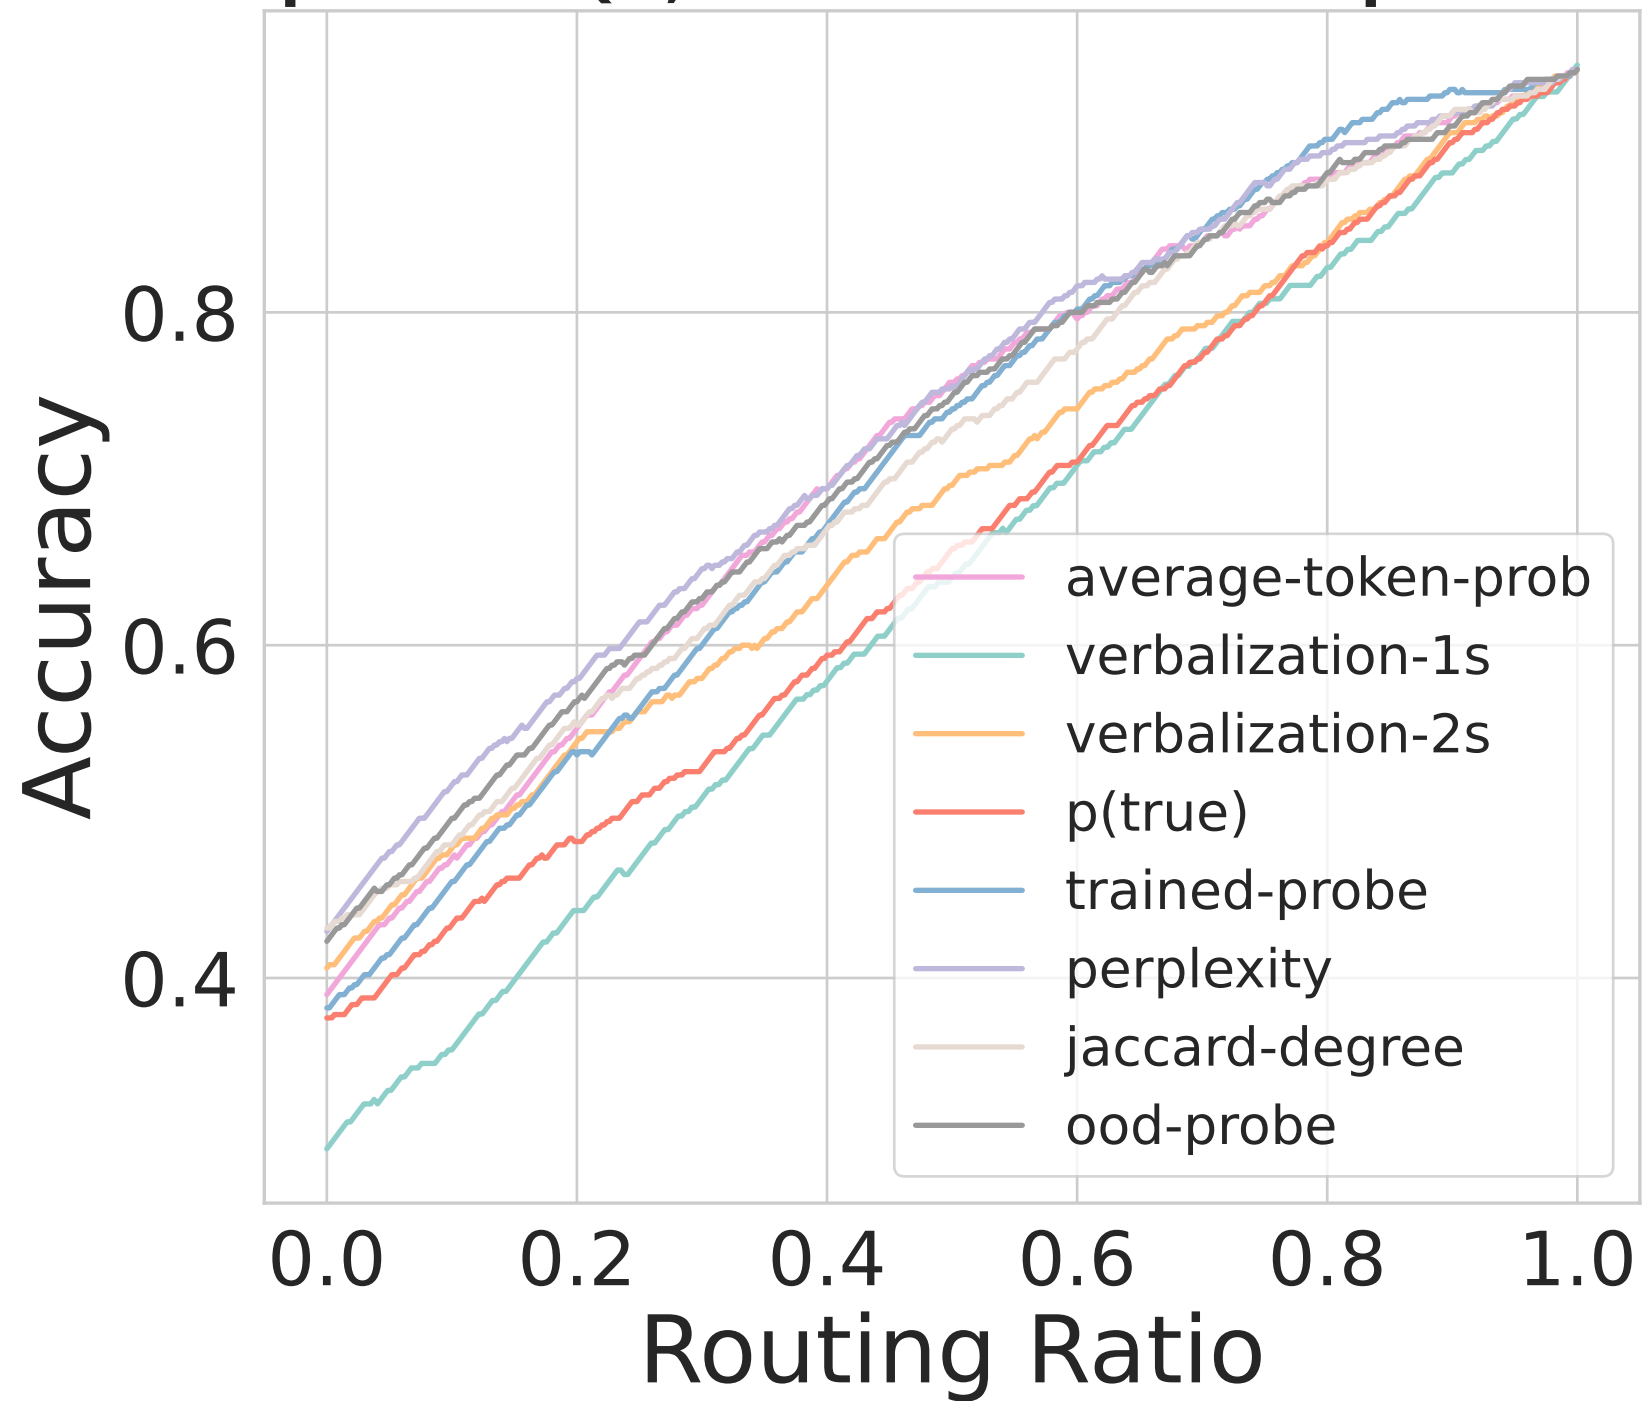

Supplement: supplementary_material [file rr_acc_openbook_qa_llama-3.2-1b_dsR1.pdf › Routing_SLM_LLMs/Uncertainty-based Routing/w_legend/to_dsR1/rr_acc_openbook_qa_llama-3.2-1b_dsR1.pdf]

# OpenBookQA, llama-3.2-3b to DeepSeek-R1

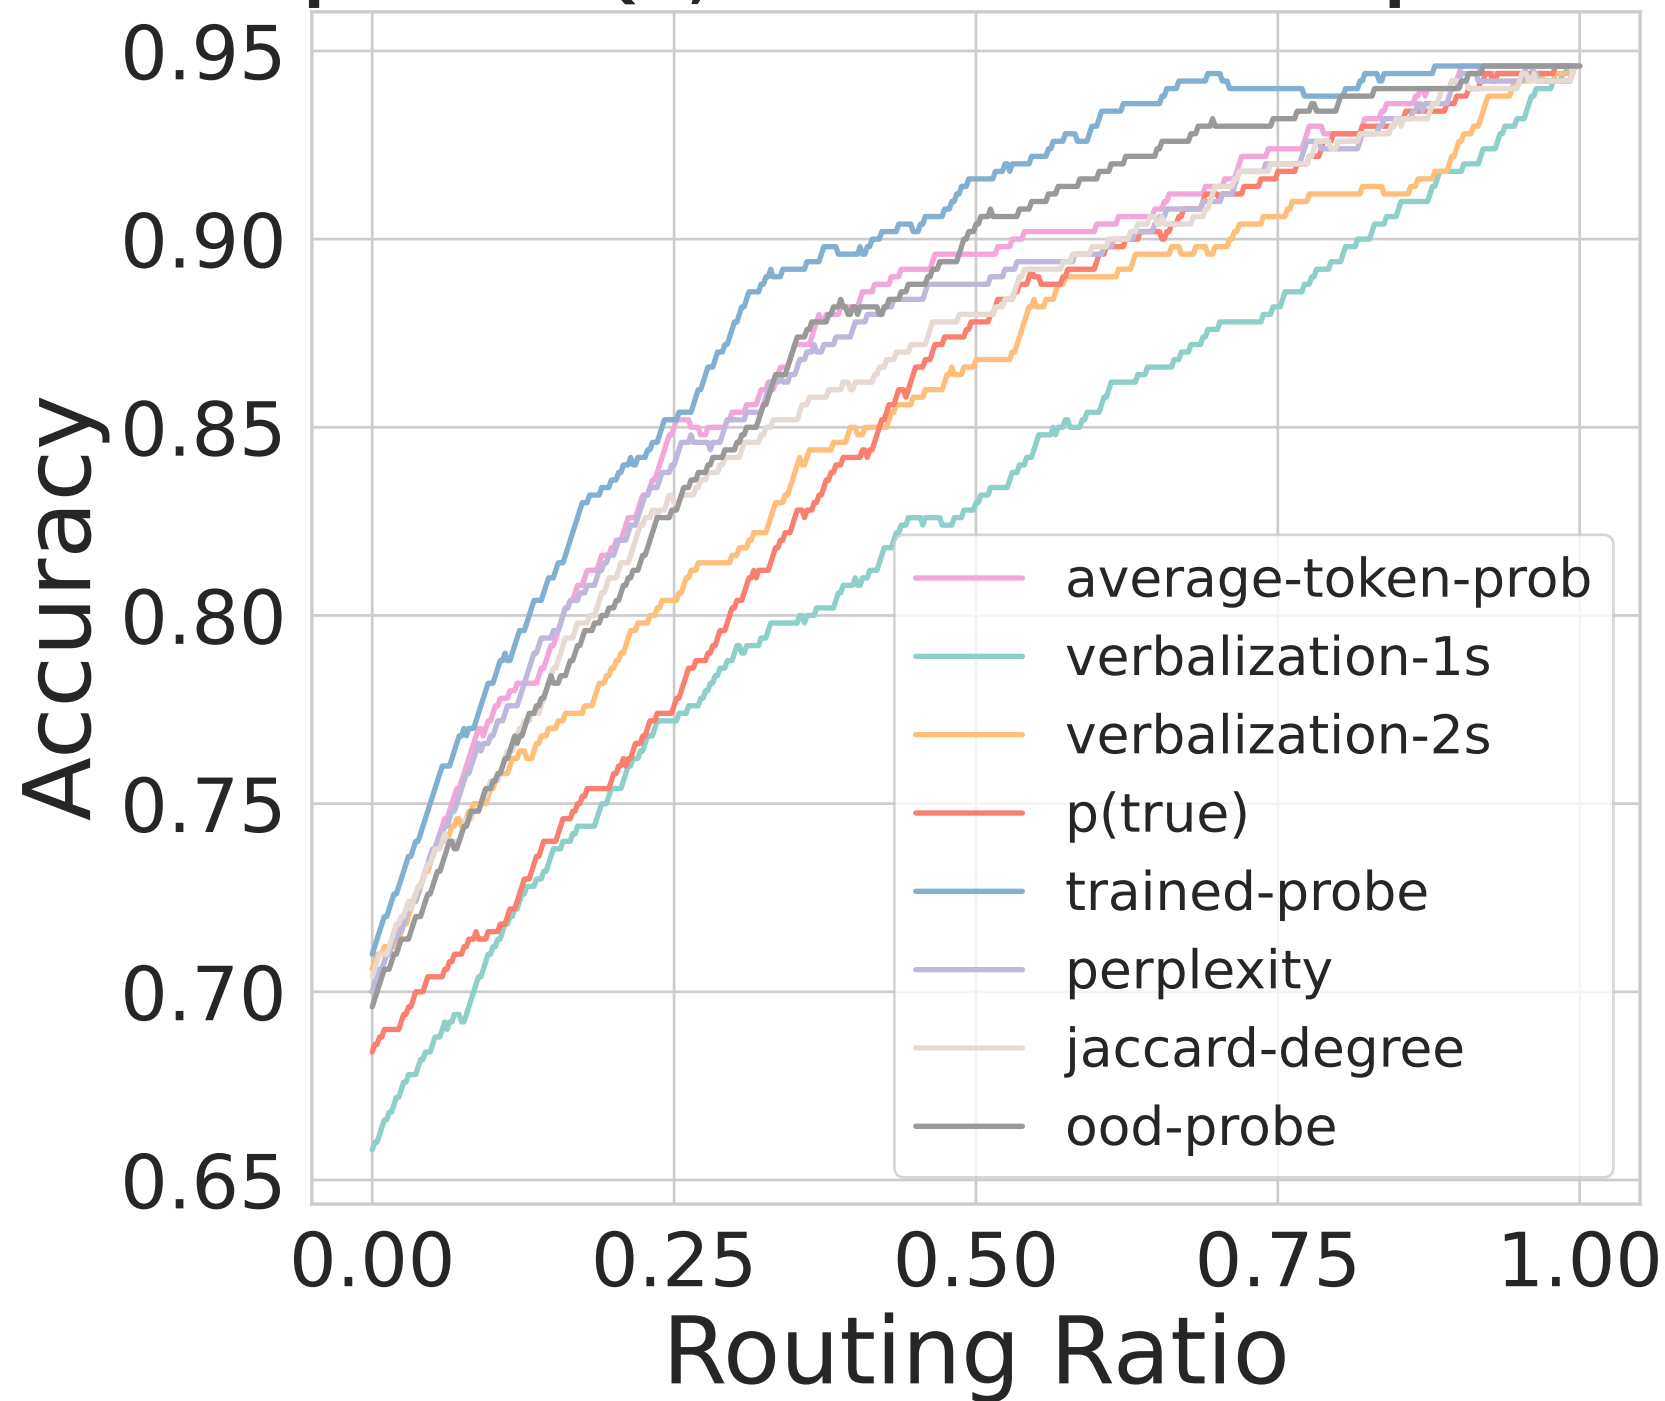

Supplement: supplementary_material [file rr_acc_openbook_qa_llama-3.2-3b_dsR1.pdf › Routing_SLM_LLMs/Uncertainty-based Routing/w_legend/to_dsR1/rr_acc_openbook_qa_llama-3.2-3b_dsR1.pdf]

# OpenBookQA, mistral-7b to DeepSeek-R1

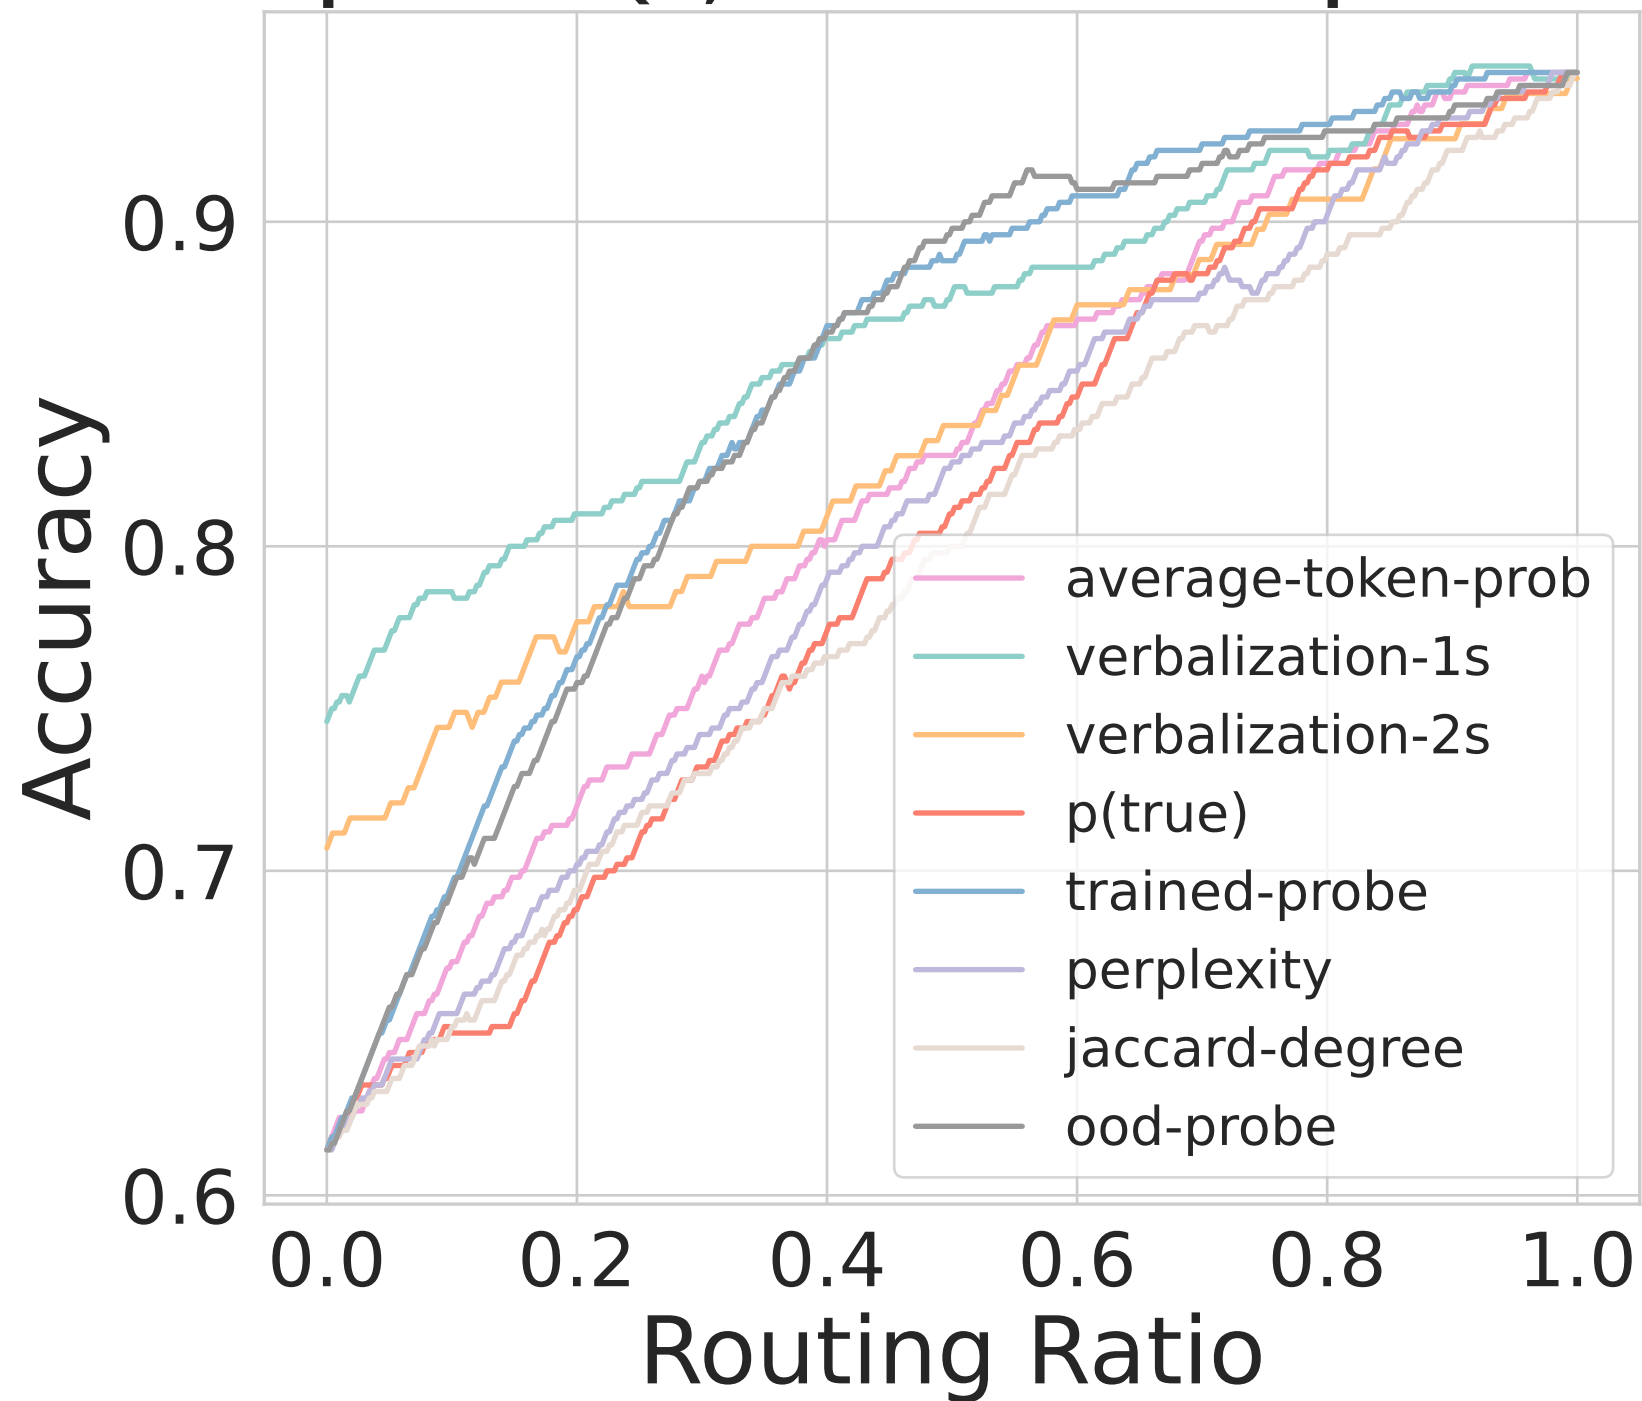

Supplement: supplementary_material [file rr_acc_openbook_qa_mistral-7b_dsR1.pdf › Routing_SLM_LLMs/Uncertainty-based Routing/w_legend/to_dsR1/rr_acc_openbook_qa_mistral-7b_dsR1.pdf]

# OpenBookQA, phi-3.5-mini to DeepSeek-R1

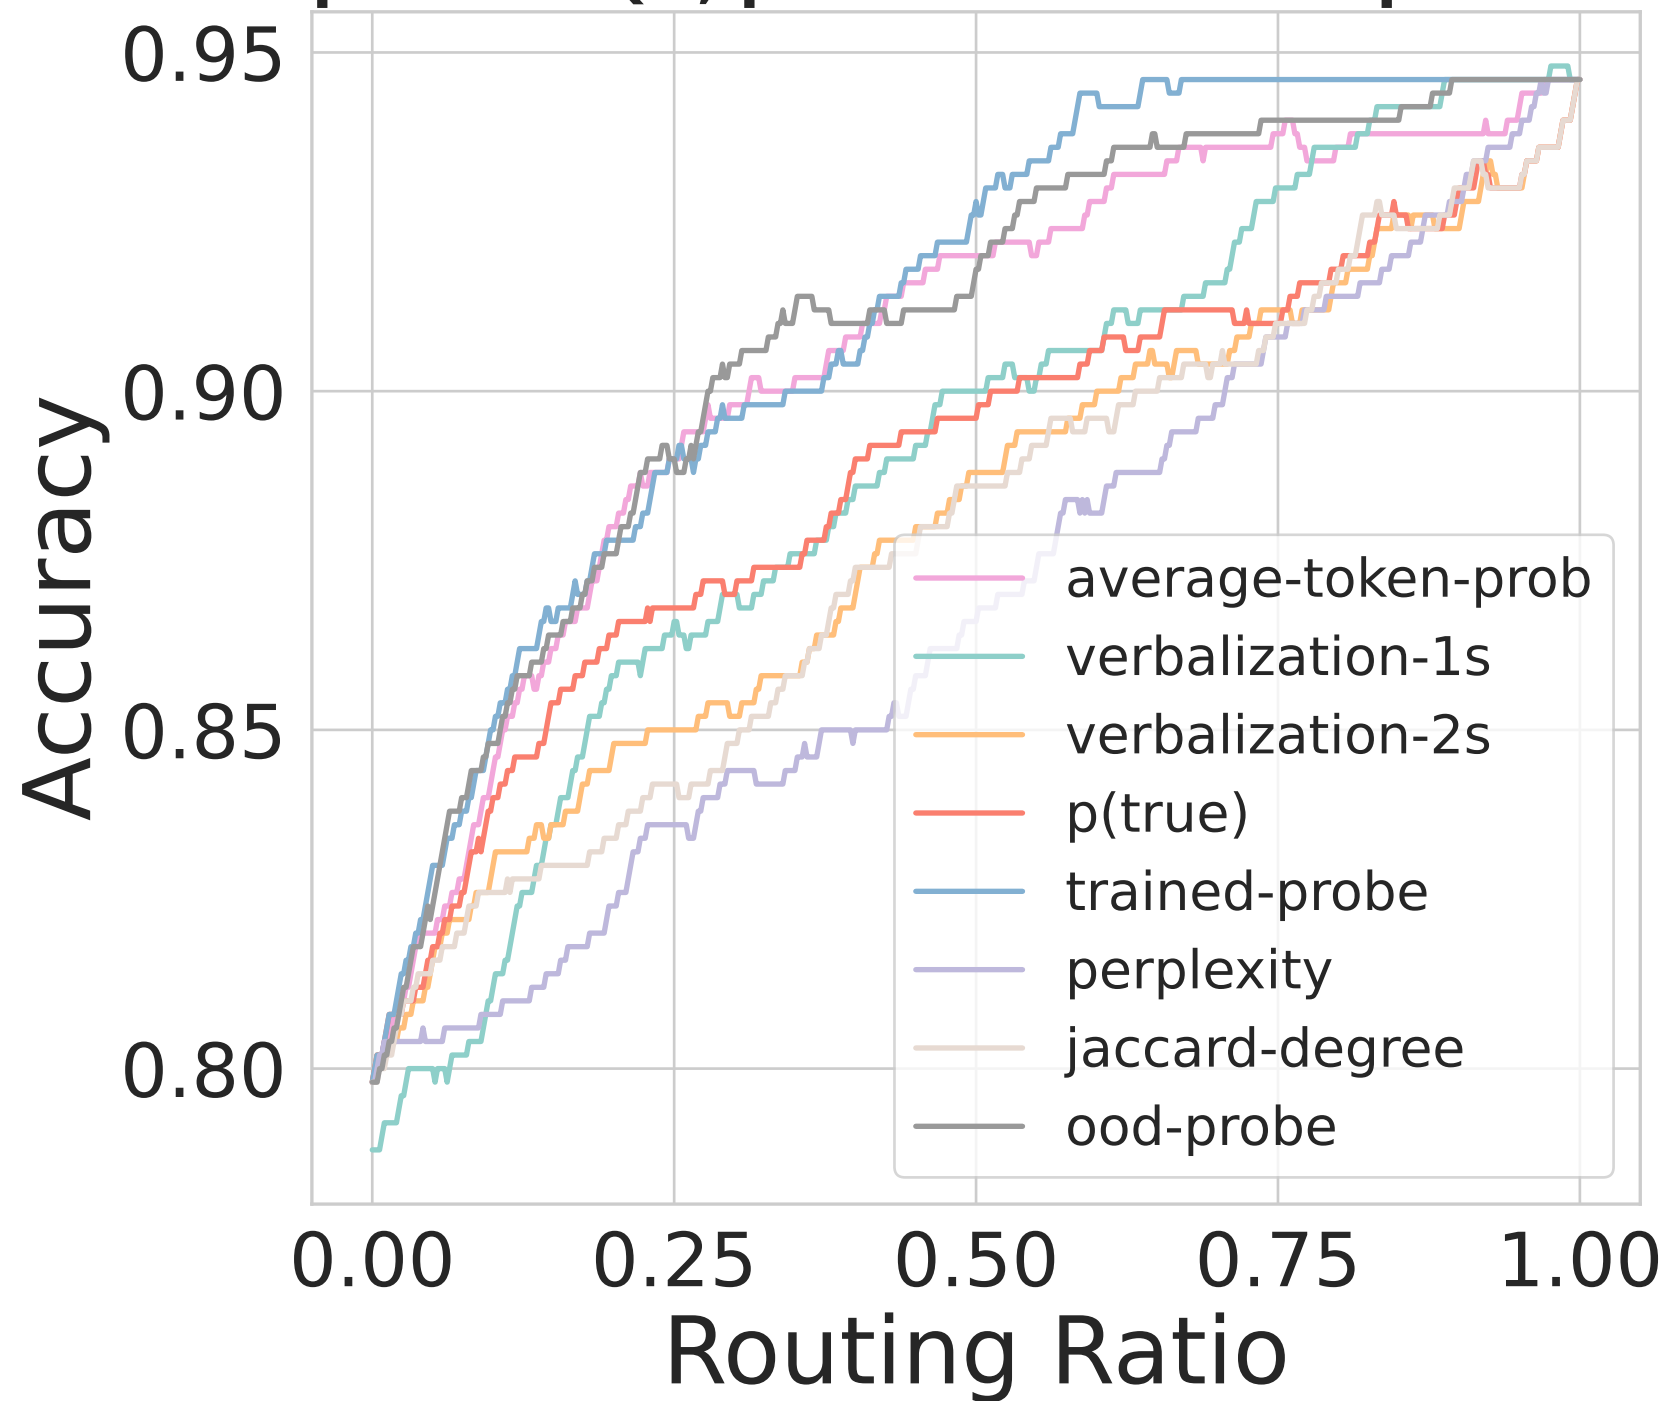

Supplement: supplementary_material [file rr_acc_openbook_qa_phi-3.5-mini_dsR1.pdf › Routing_SLM_LLMs/Uncertainty-based Routing/w_legend/to_dsR1/rr_acc_openbook_qa_phi-3.5-mini_dsR1.pdf]

# OpenBookQA, phi-4-mini-reasoning to DeepSeek-R1

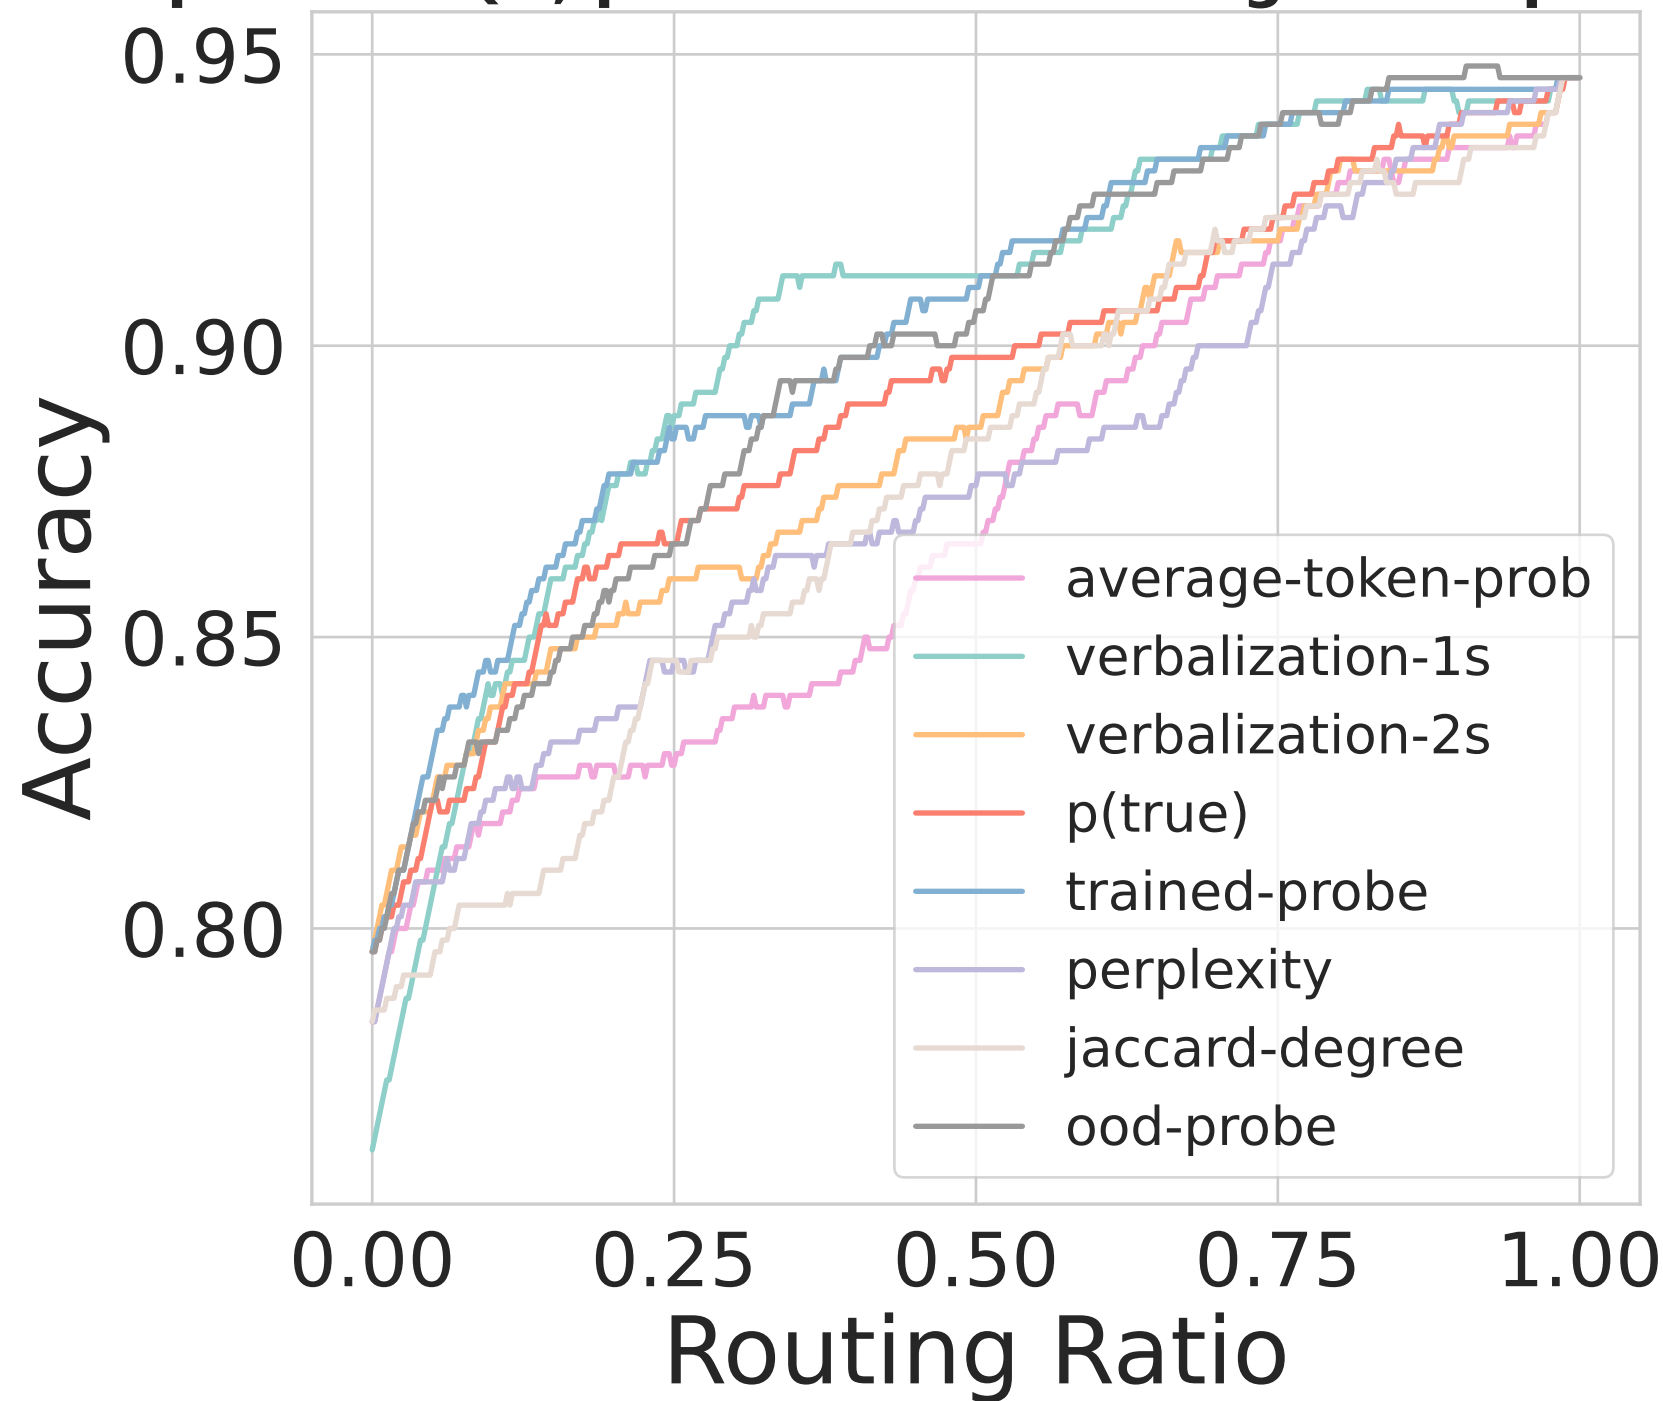

Supplement: supplementary_material [file rr_acc_openbook_qa_phi-4-mini-reasoning_dsR1.pdf › Routing_SLM_LLMs/Uncertainty-based Routing/w_legend/to_dsR1/rr_acc_openbook_qa_phi-4-mini-reasoning_dsR1.pdf]

# OpenBookQA, qwen-2.5-7b to DeepSeek-R1

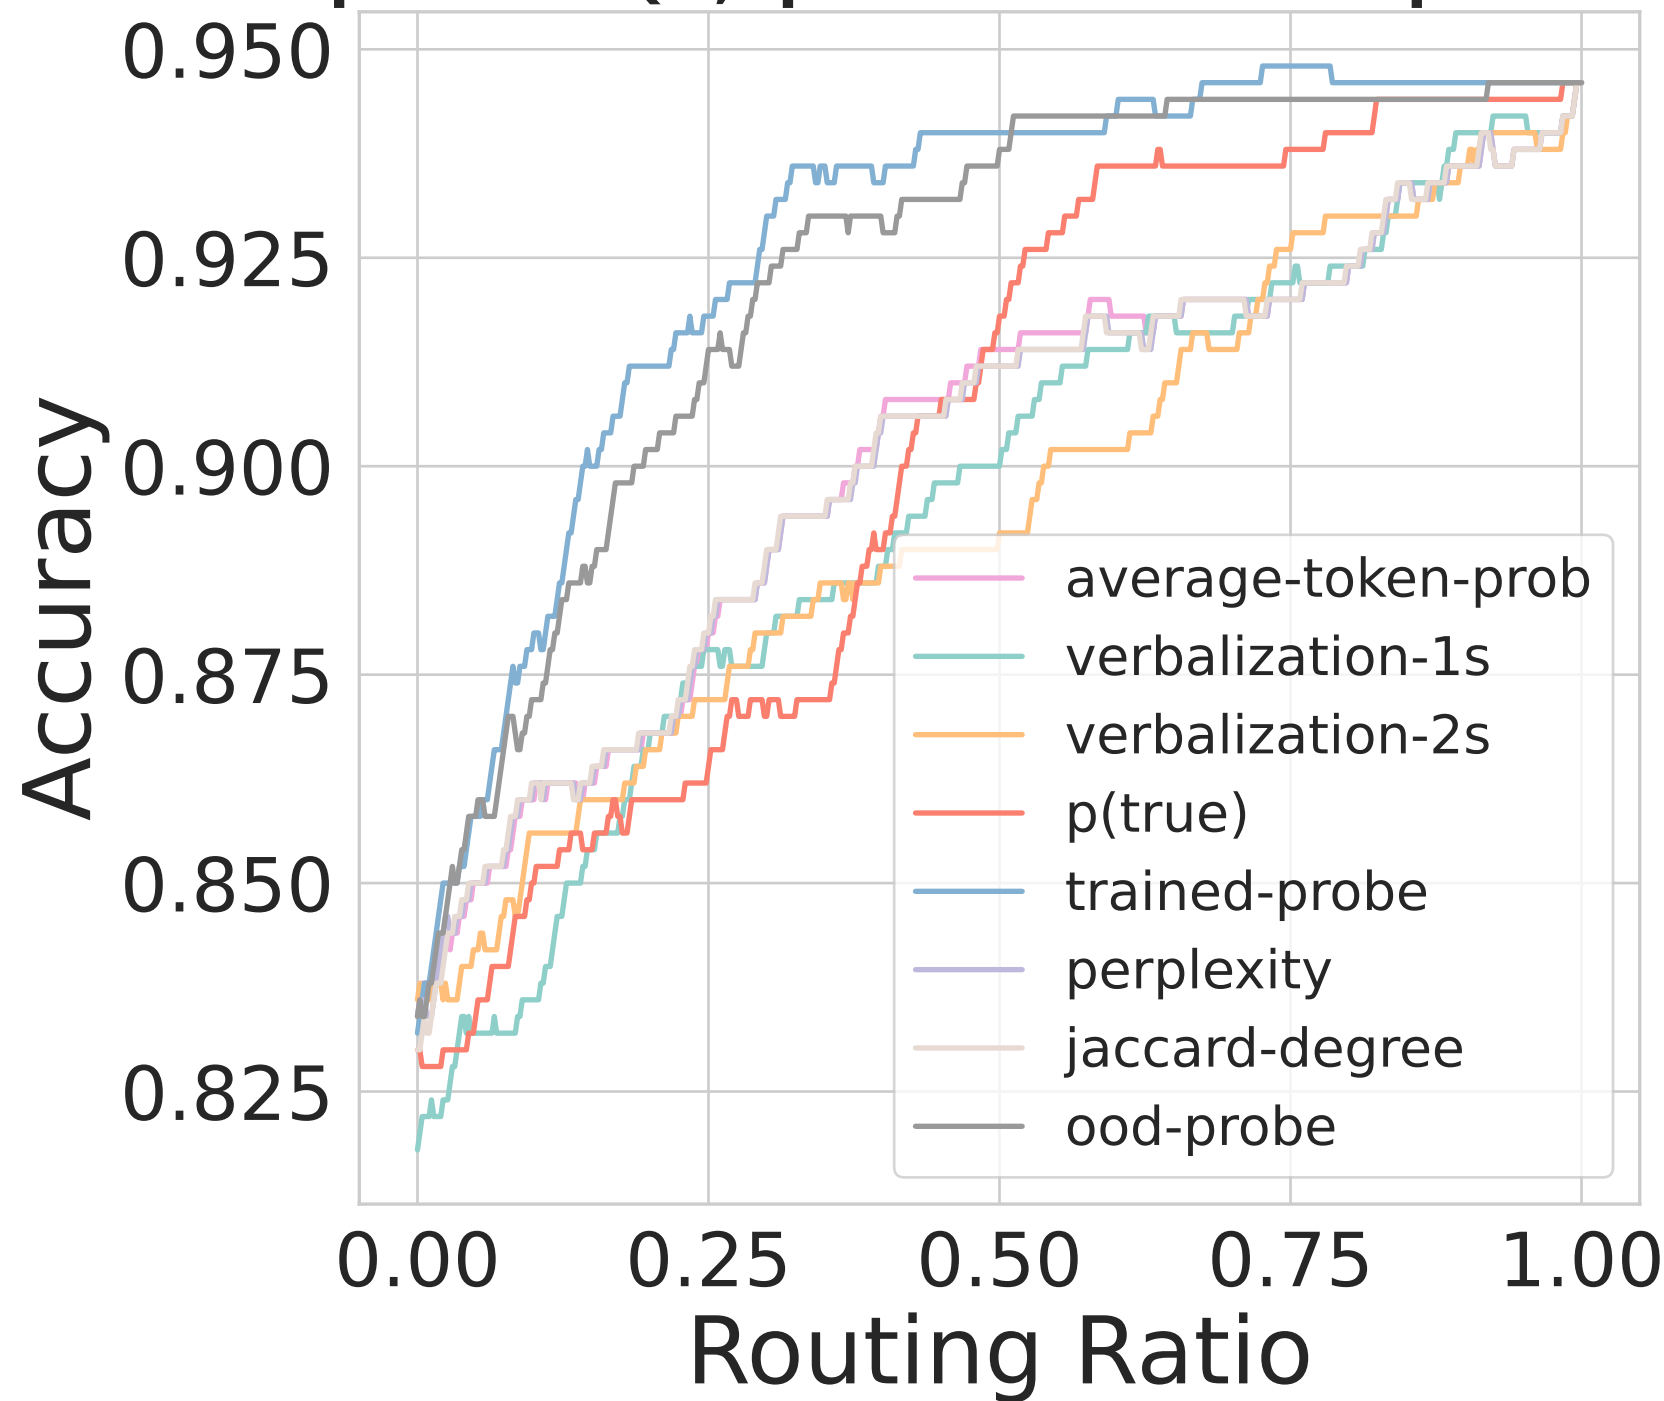

Supplement: supplementary_material [file rr_acc_openbook_qa_qwen-2.5-7b_dsR1.pdf › Routing_SLM_LLMs/Uncertainty-based Routing/w_legend/to_dsR1/rr_acc_openbook_qa_qwen-2.5-7b_dsR1.pdf]

# OpenBookQA, rwkv to DeepSeek-R1

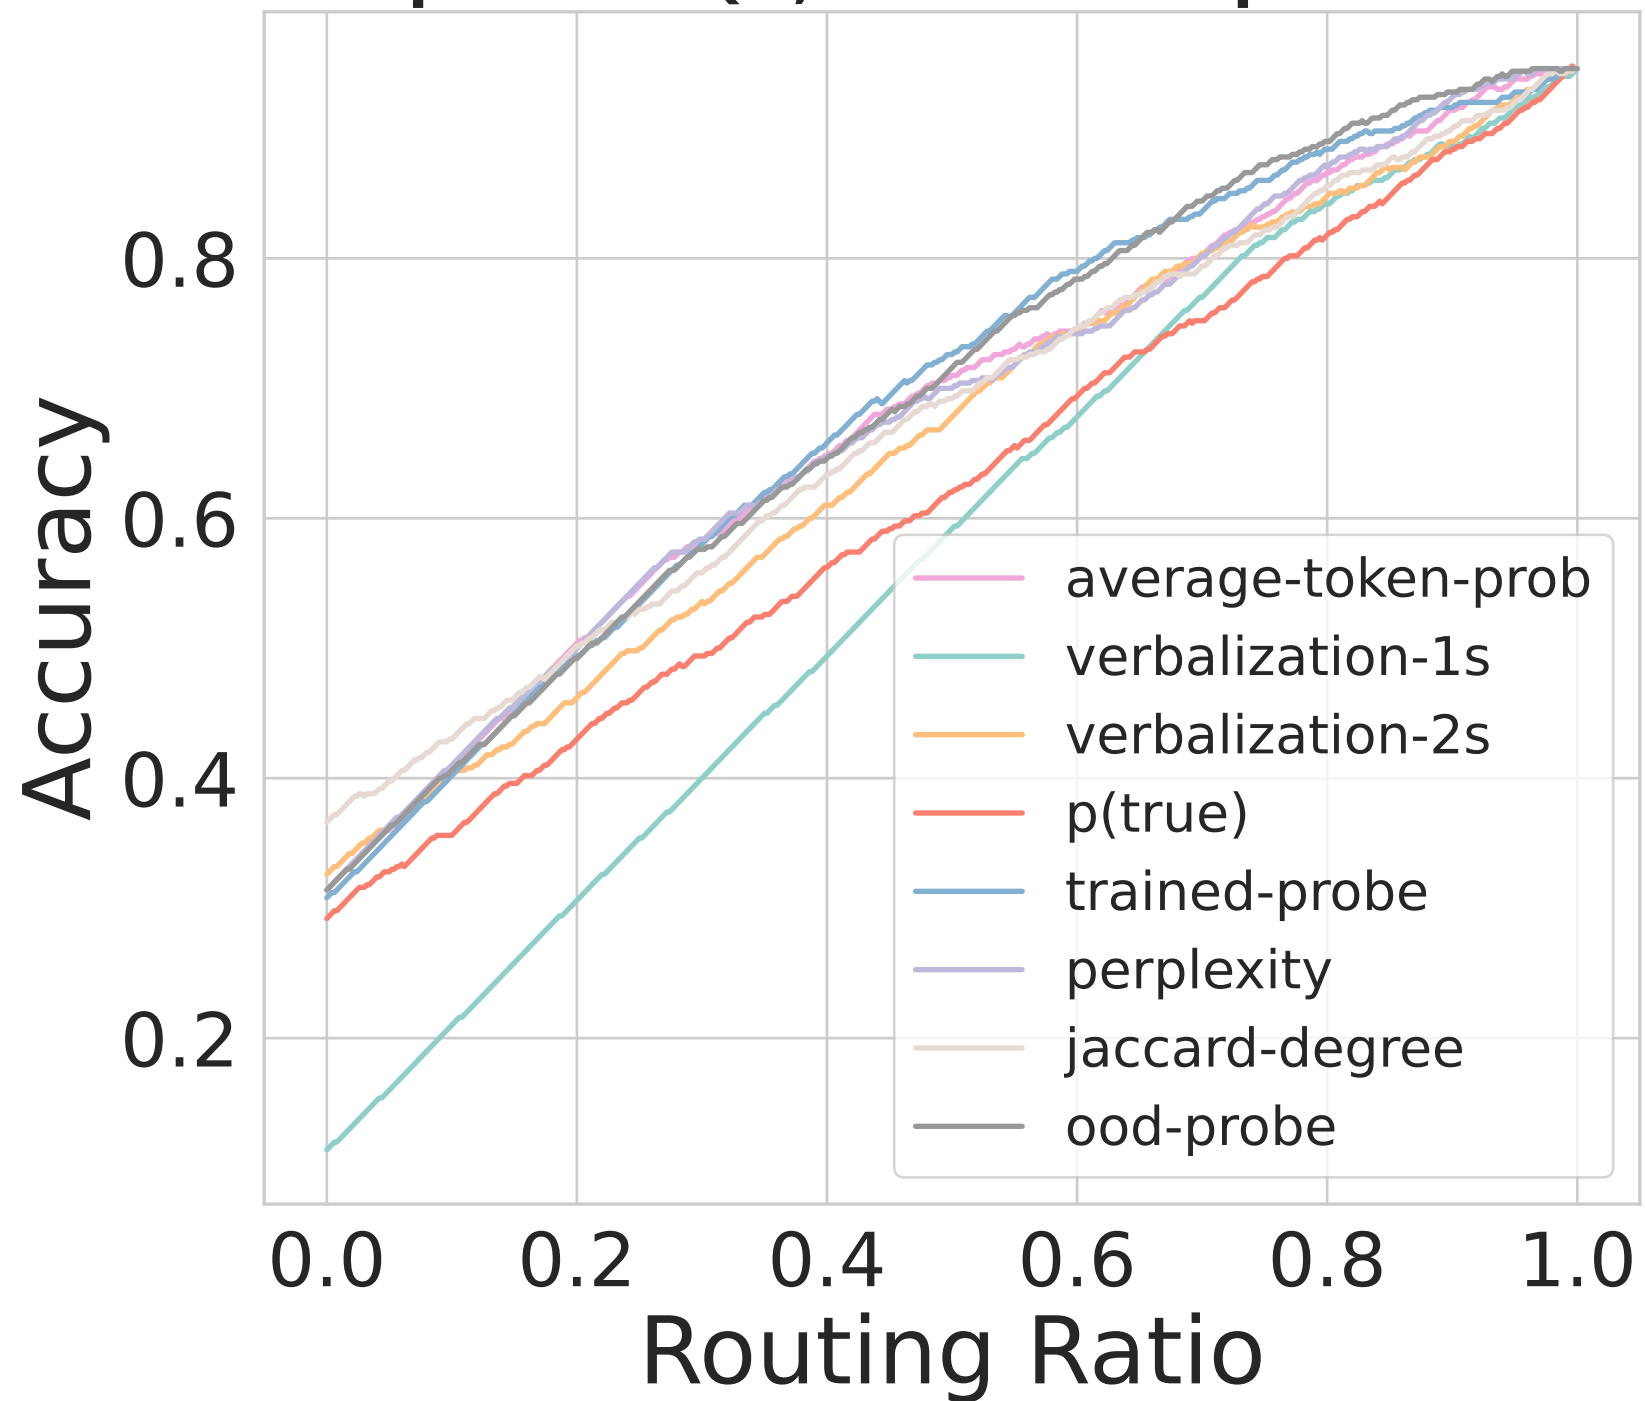

Supplement: supplementary_material [file rr_acc_openbook_qa_rwkv_dsR1.pdf › Routing_SLM_LLMs/Uncertainty-based Routing/w_legend/to_dsR1/rr_acc_openbook_qa_rwkv_dsR1.pdf]

# PIQA, Qwen3-0.6B to DeepSeek-R1

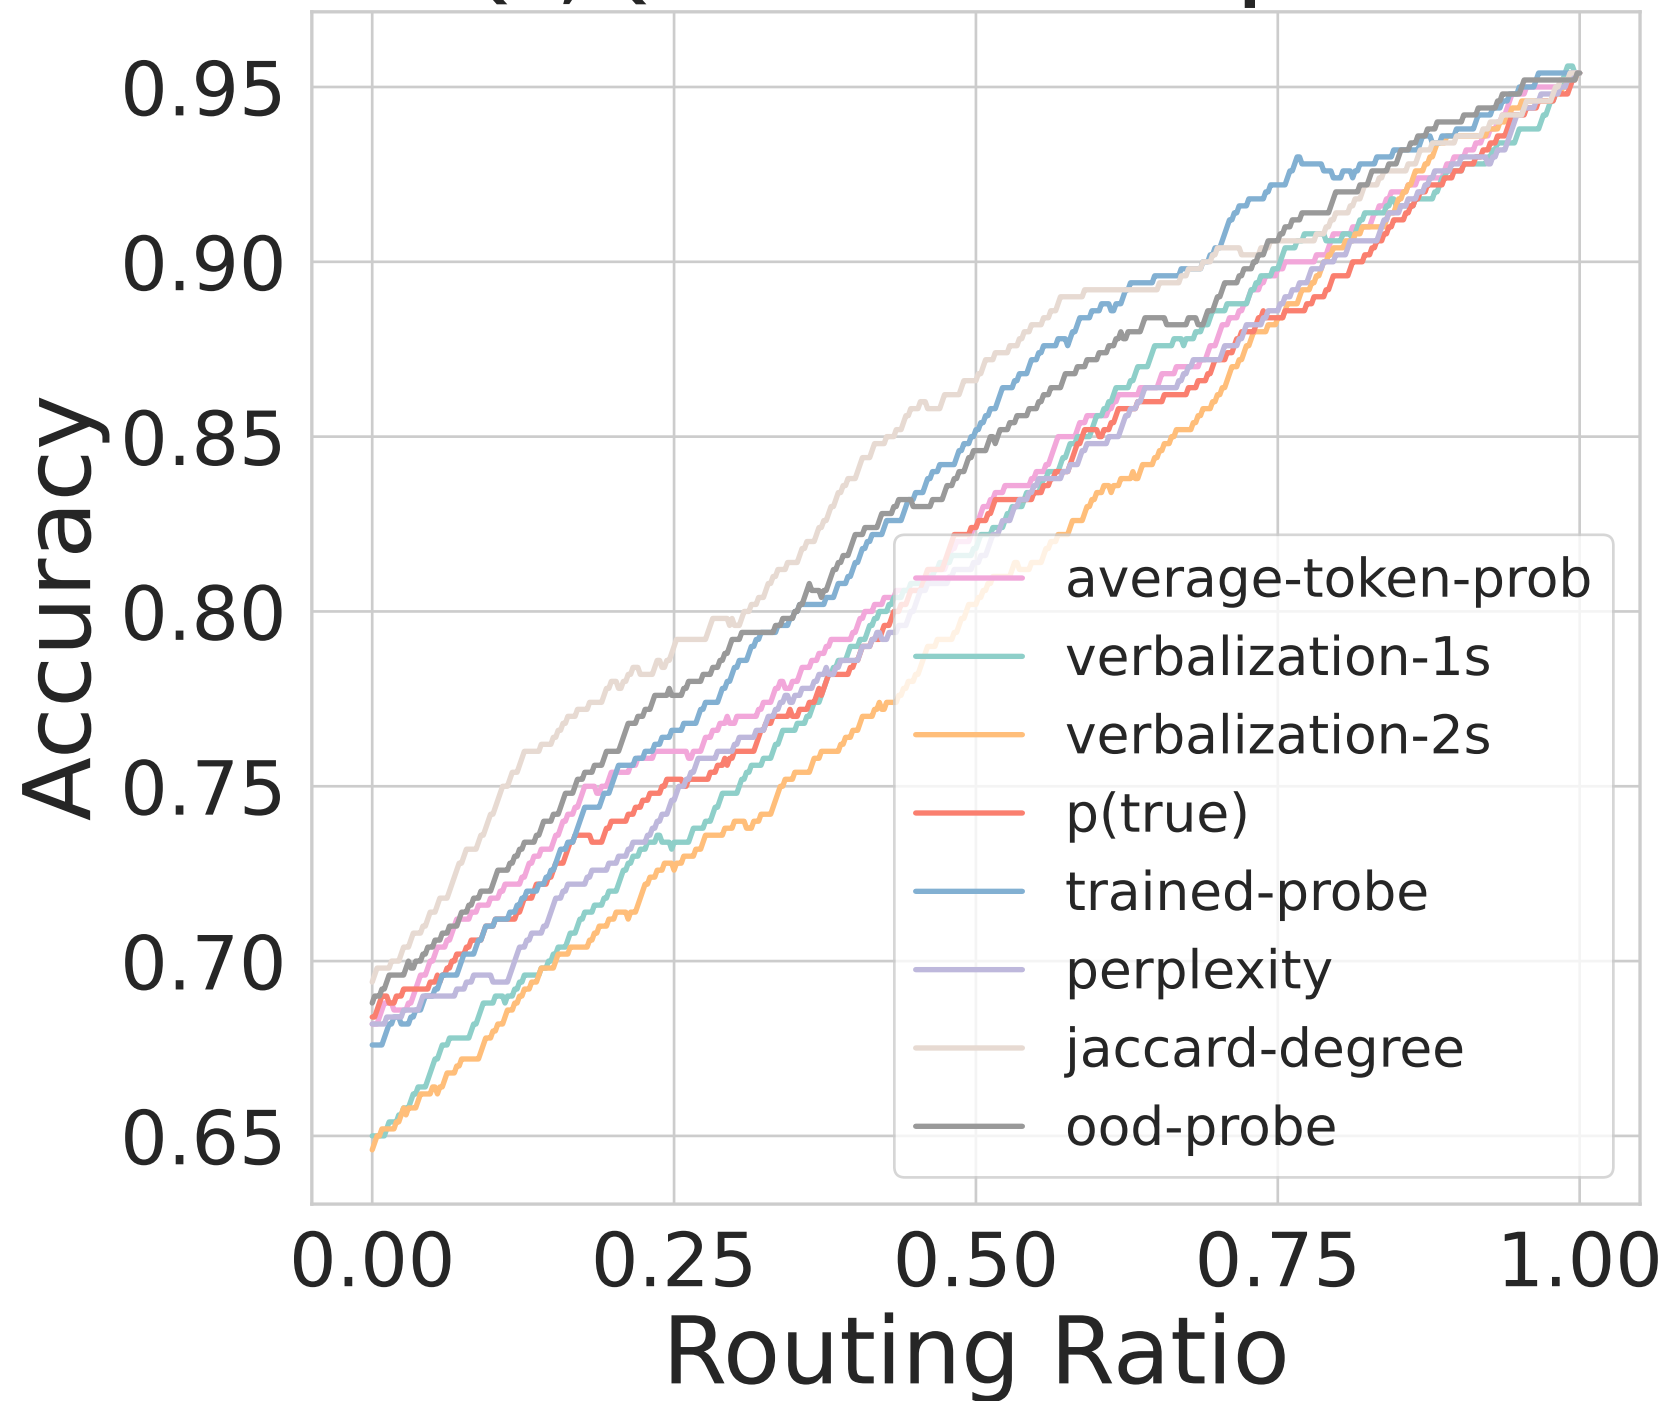

Supplement: supplementary_material [file rr_acc_pi_qa_Qwen3-0.6B_dsR1.pdf › Routing_SLM_LLMs/Uncertainty-based Routing/w_legend/to_dsR1/rr_acc_pi_qa_Qwen3-0.6B_dsR1.pdf]

# PIQA, Qwen3-1.7B to DeepSeek-R1

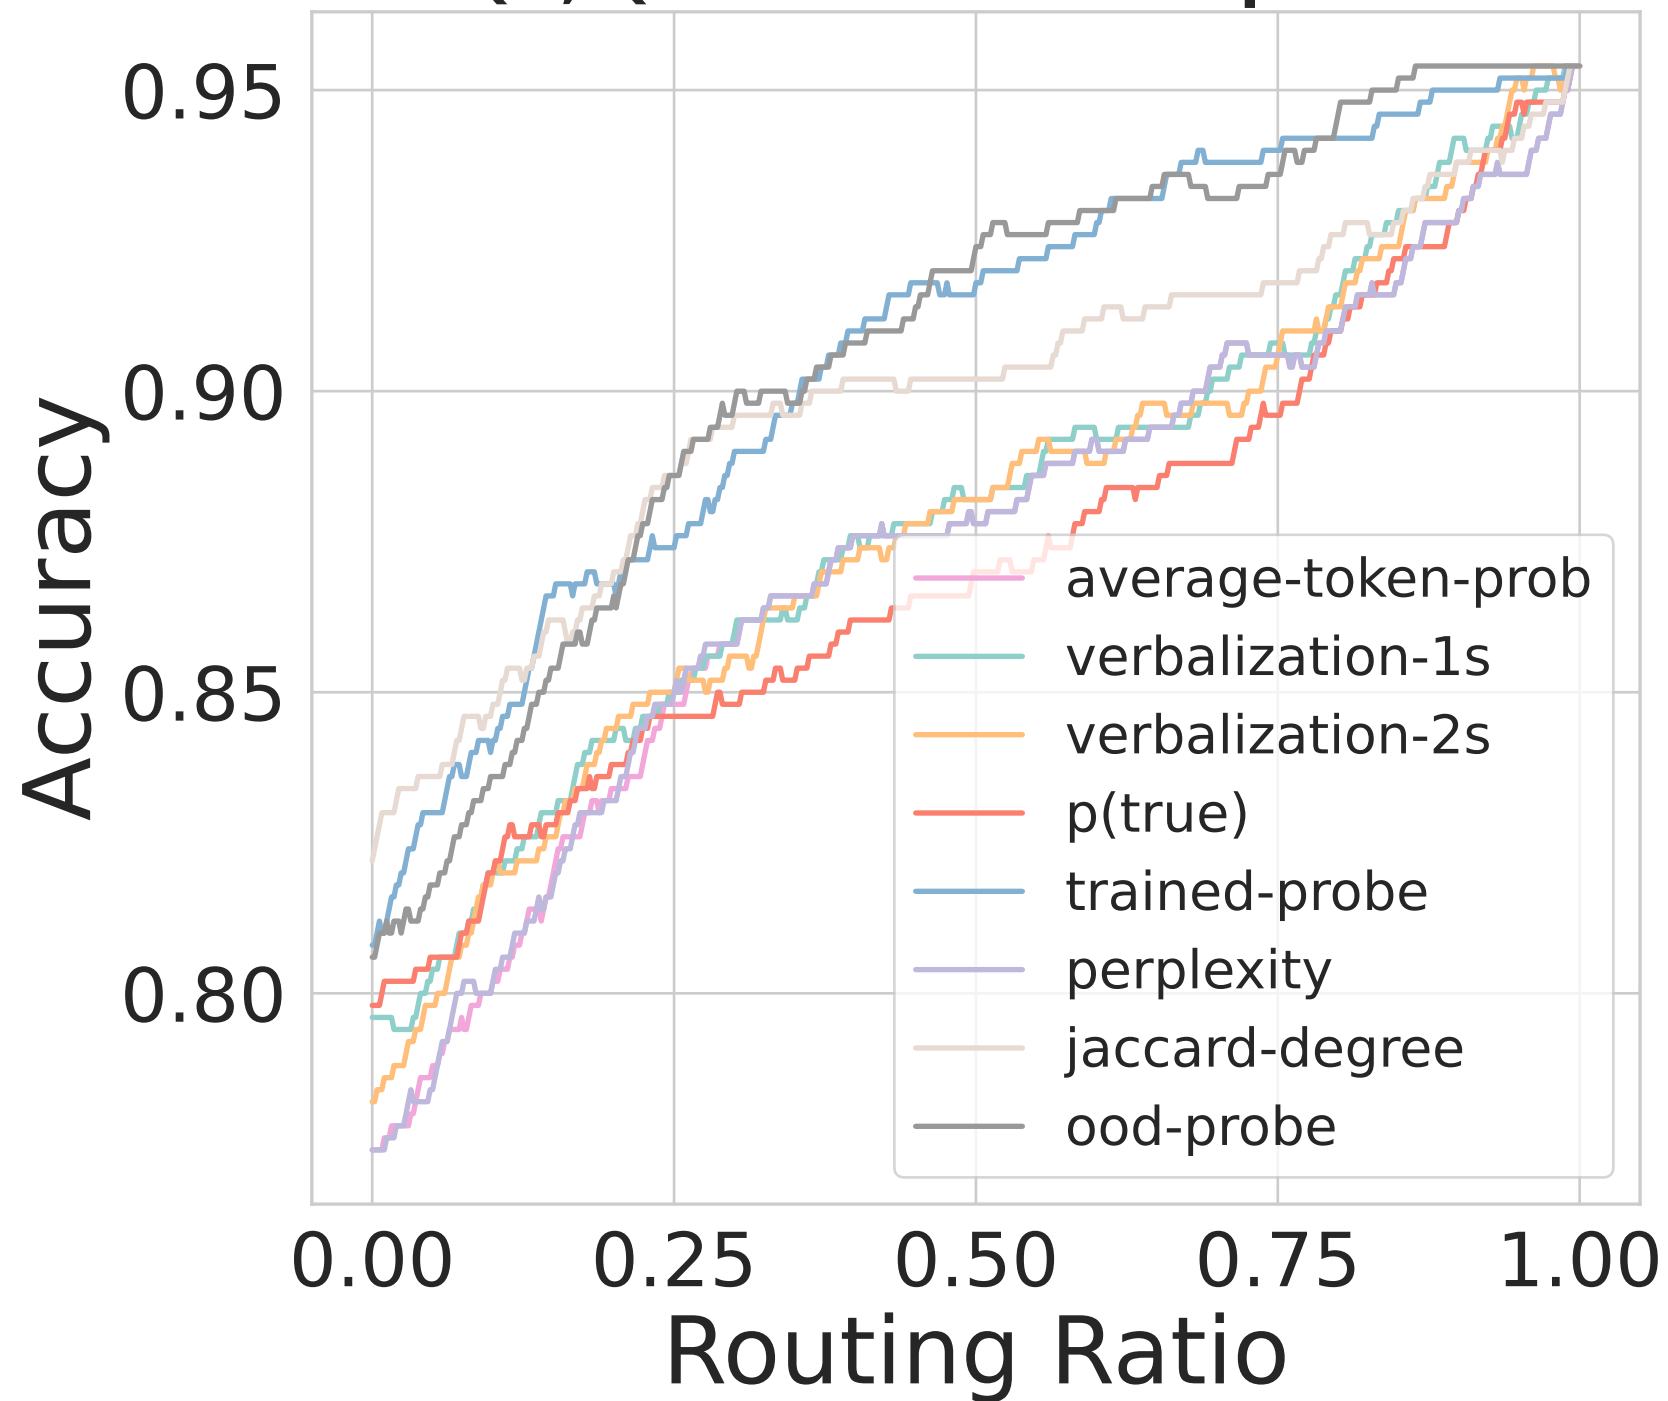

Supplement: supplementary_material [file rr_acc_pi_qa_Qwen3-1.7B_dsR1.pdf › Routing_SLM_LLMs/Uncertainty-based Routing/w_legend/to_dsR1/rr_acc_pi_qa_Qwen3-1.7B_dsR1.pdf]

**PIQA, granite-3.1-8b to DeepSeek-R1**

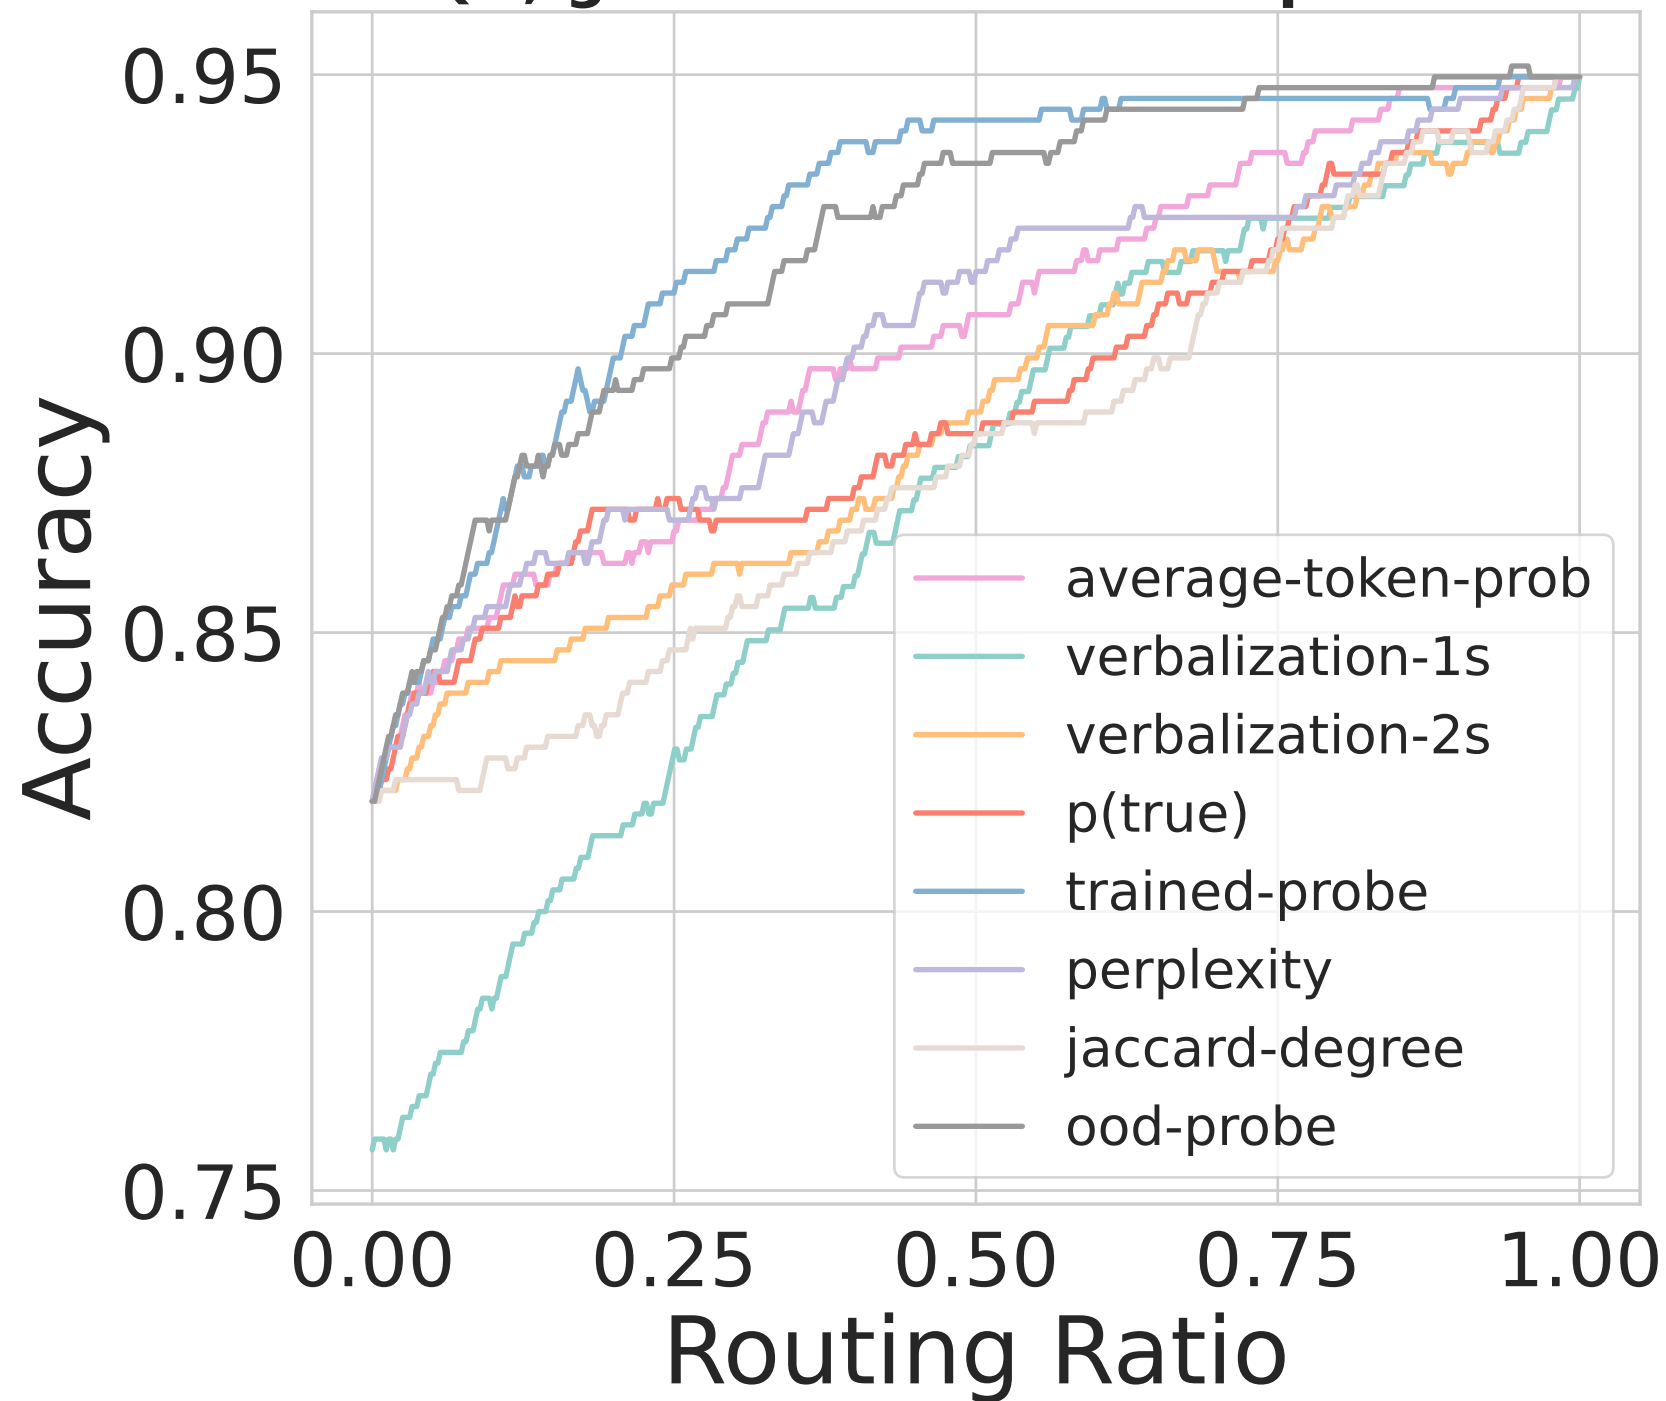

Supplement: supplementary_material [file rr_acc_pi_qa_granite-3.1-8b_dsR1.pdf › Routing_SLM_LLMs/Uncertainty-based Routing/w_legend/to_dsR1/rr_acc_pi_qa_granite-3.1-8b_dsR1.pdf]

# PIQA, llama-3.1-8b to DeepSeek-R1

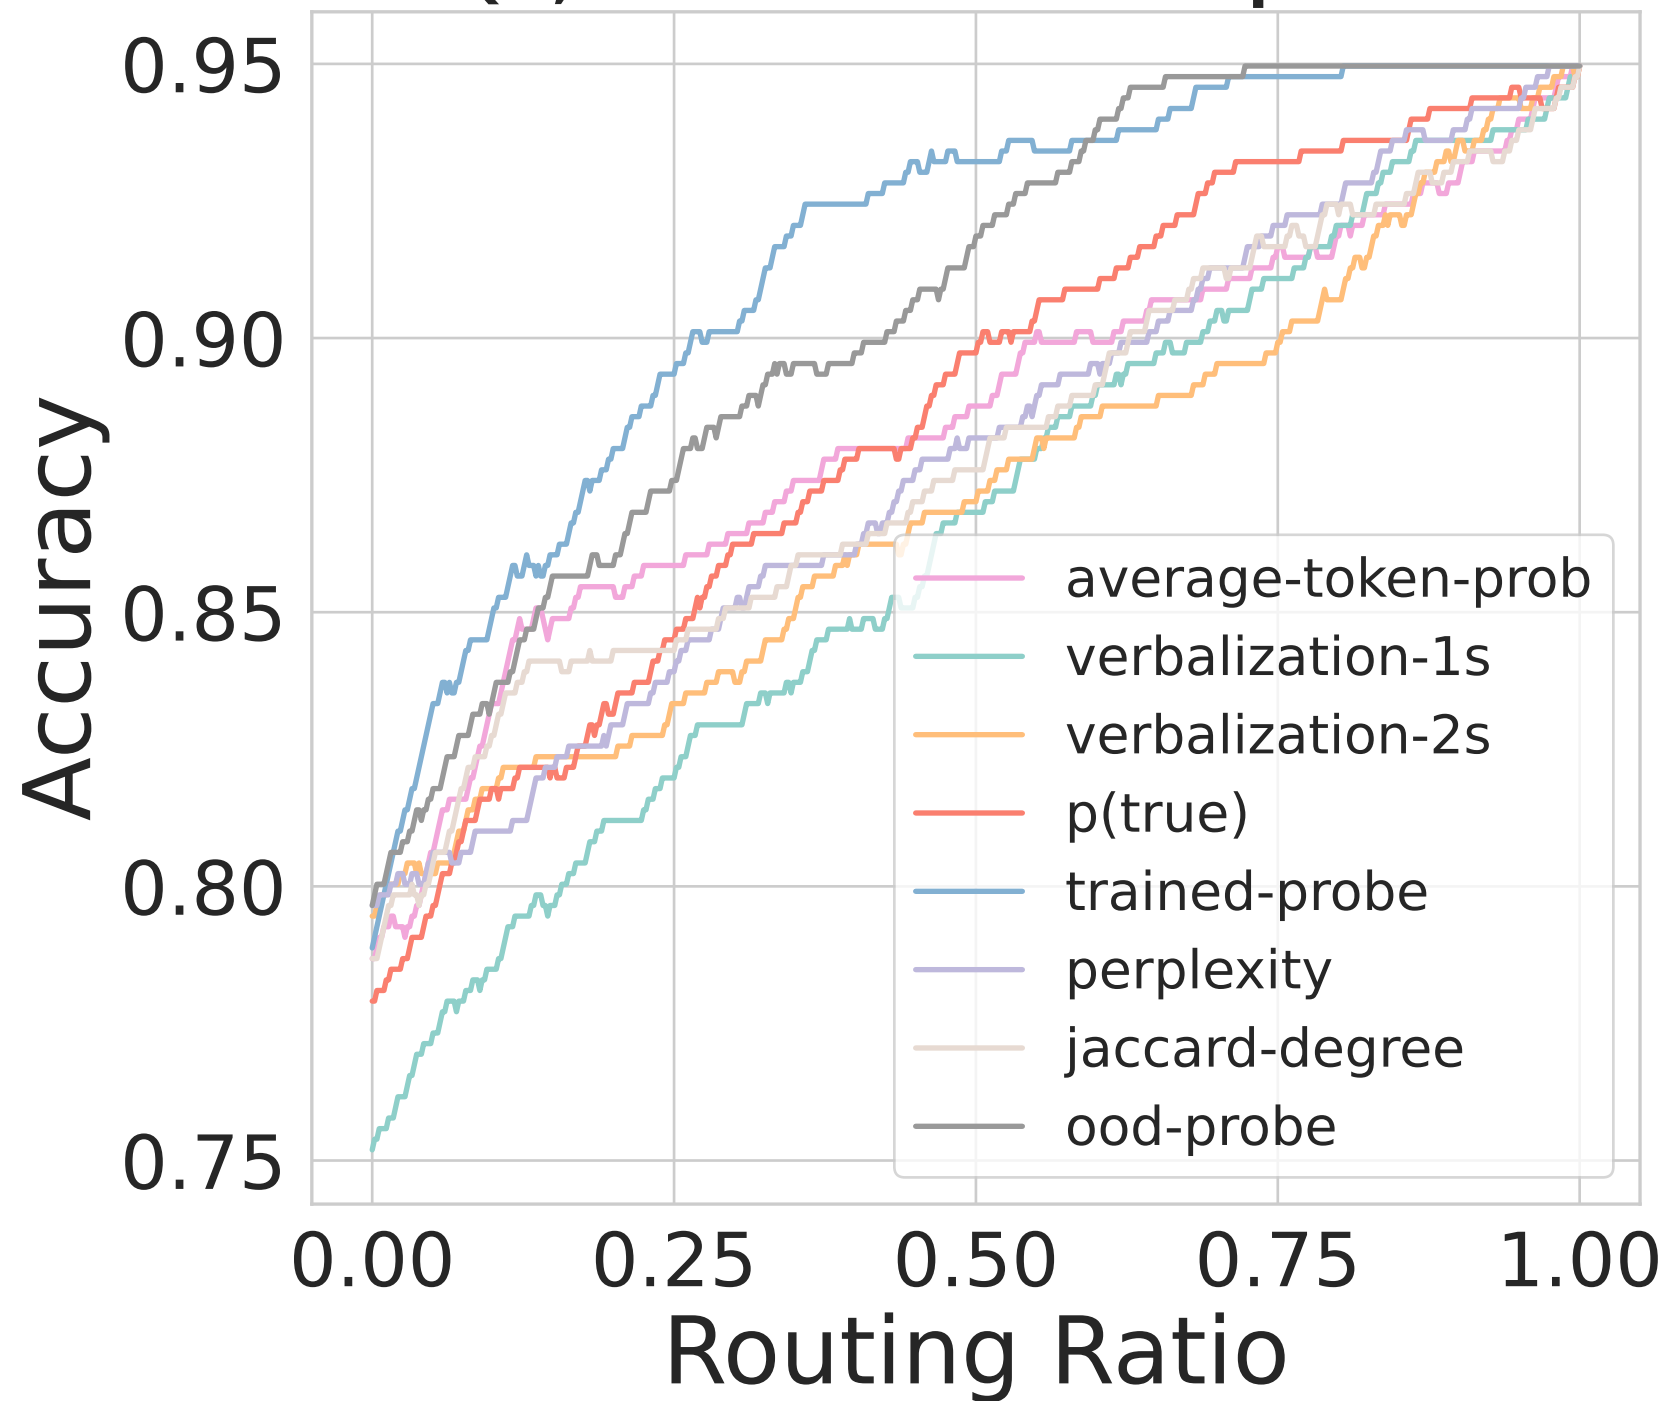

Supplement: supplementary_material [file rr_acc_pi_qa_llama-3.1-8b_dsR1.pdf › Routing_SLM_LLMs/Uncertainty-based Routing/w_legend/to_dsR1/rr_acc_pi_qa_llama-3.1-8b_dsR1.pdf]

# PIQA, llama-3.2-1b to DeepSeek-R1

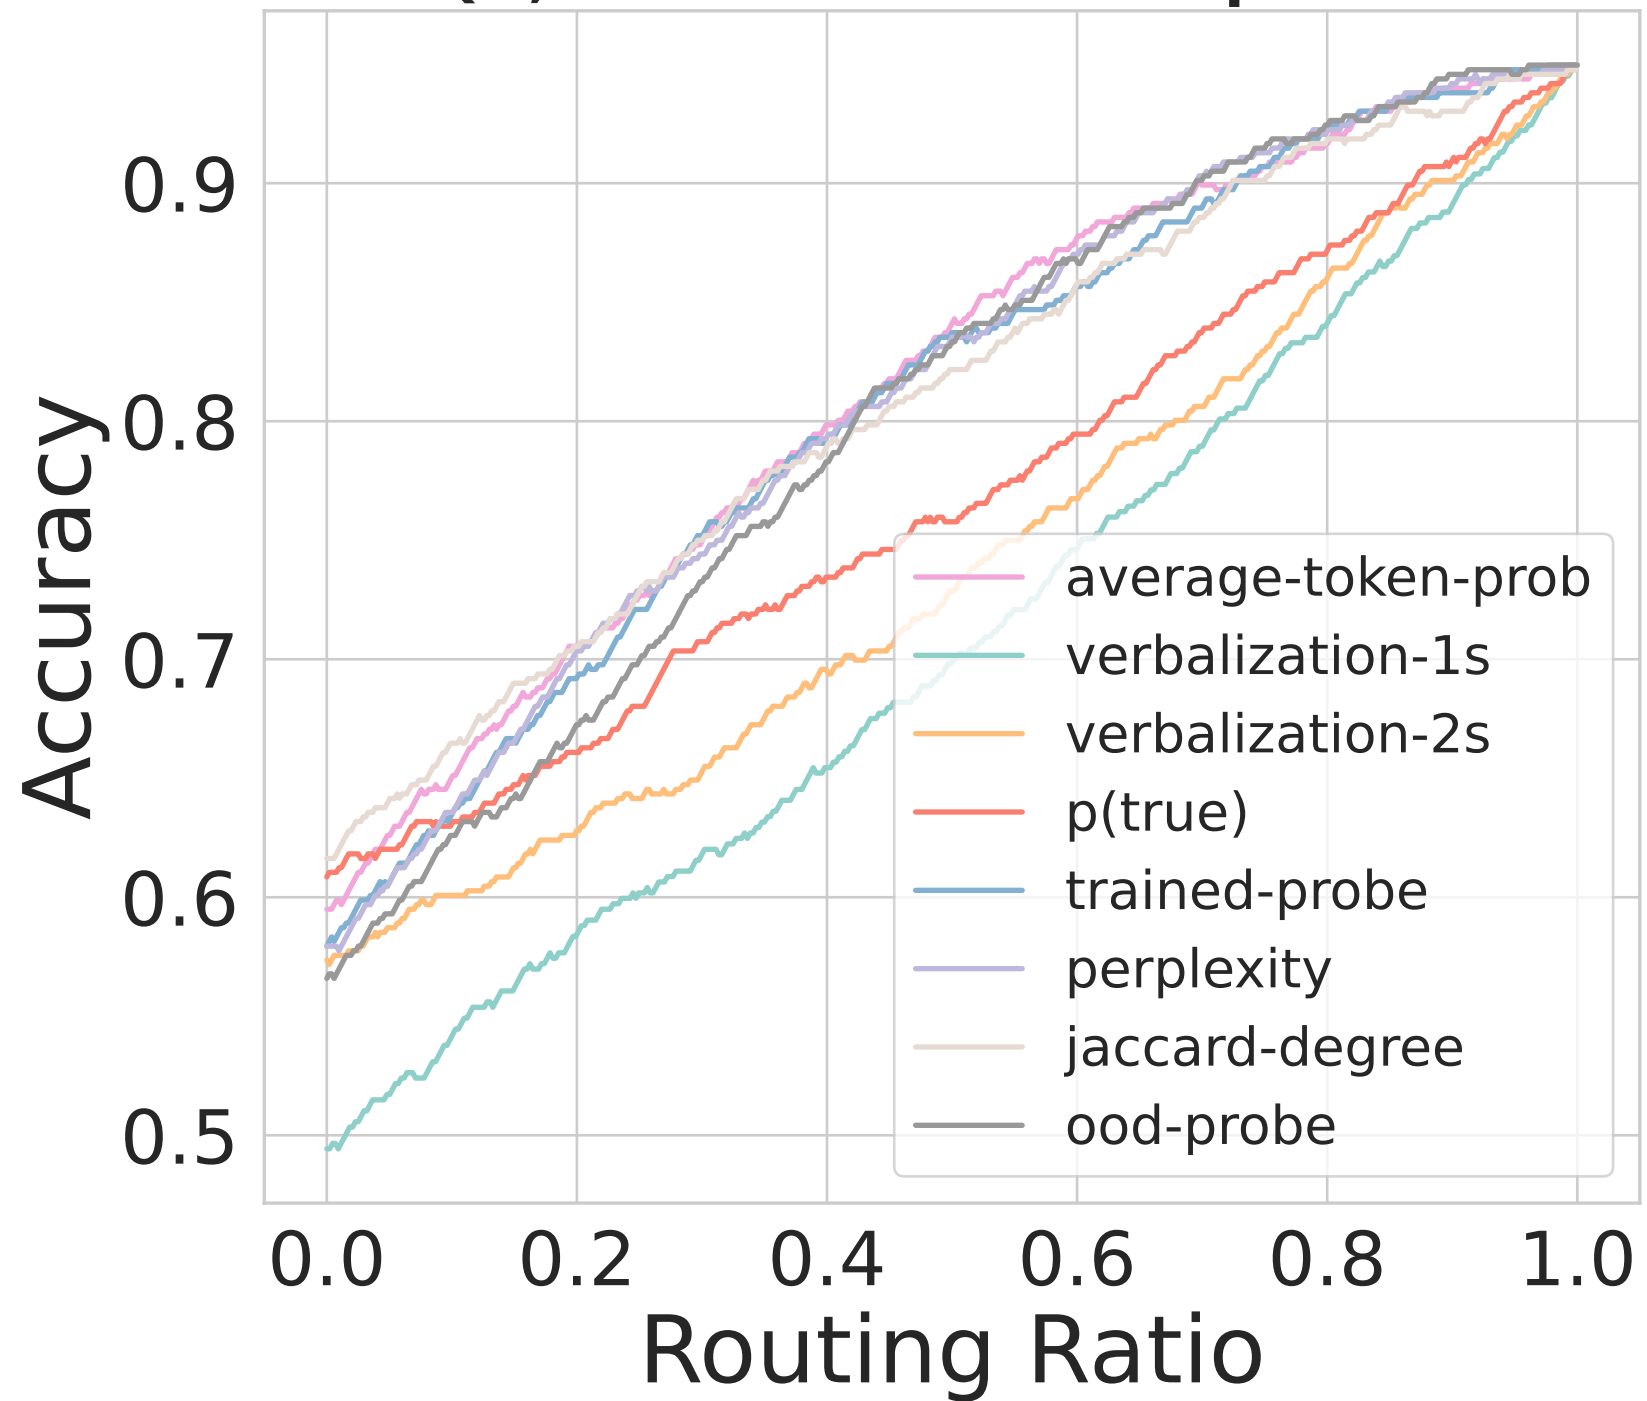

Supplement: supplementary_material [file rr_acc_pi_qa_llama-3.2-1b_dsR1.pdf › Routing_SLM_LLMs/Uncertainty-based Routing/w_legend/to_dsR1/rr_acc_pi_qa_llama-3.2-1b_dsR1.pdf]

# PIQA, llama-3.2-3b to DeepSeek-R1

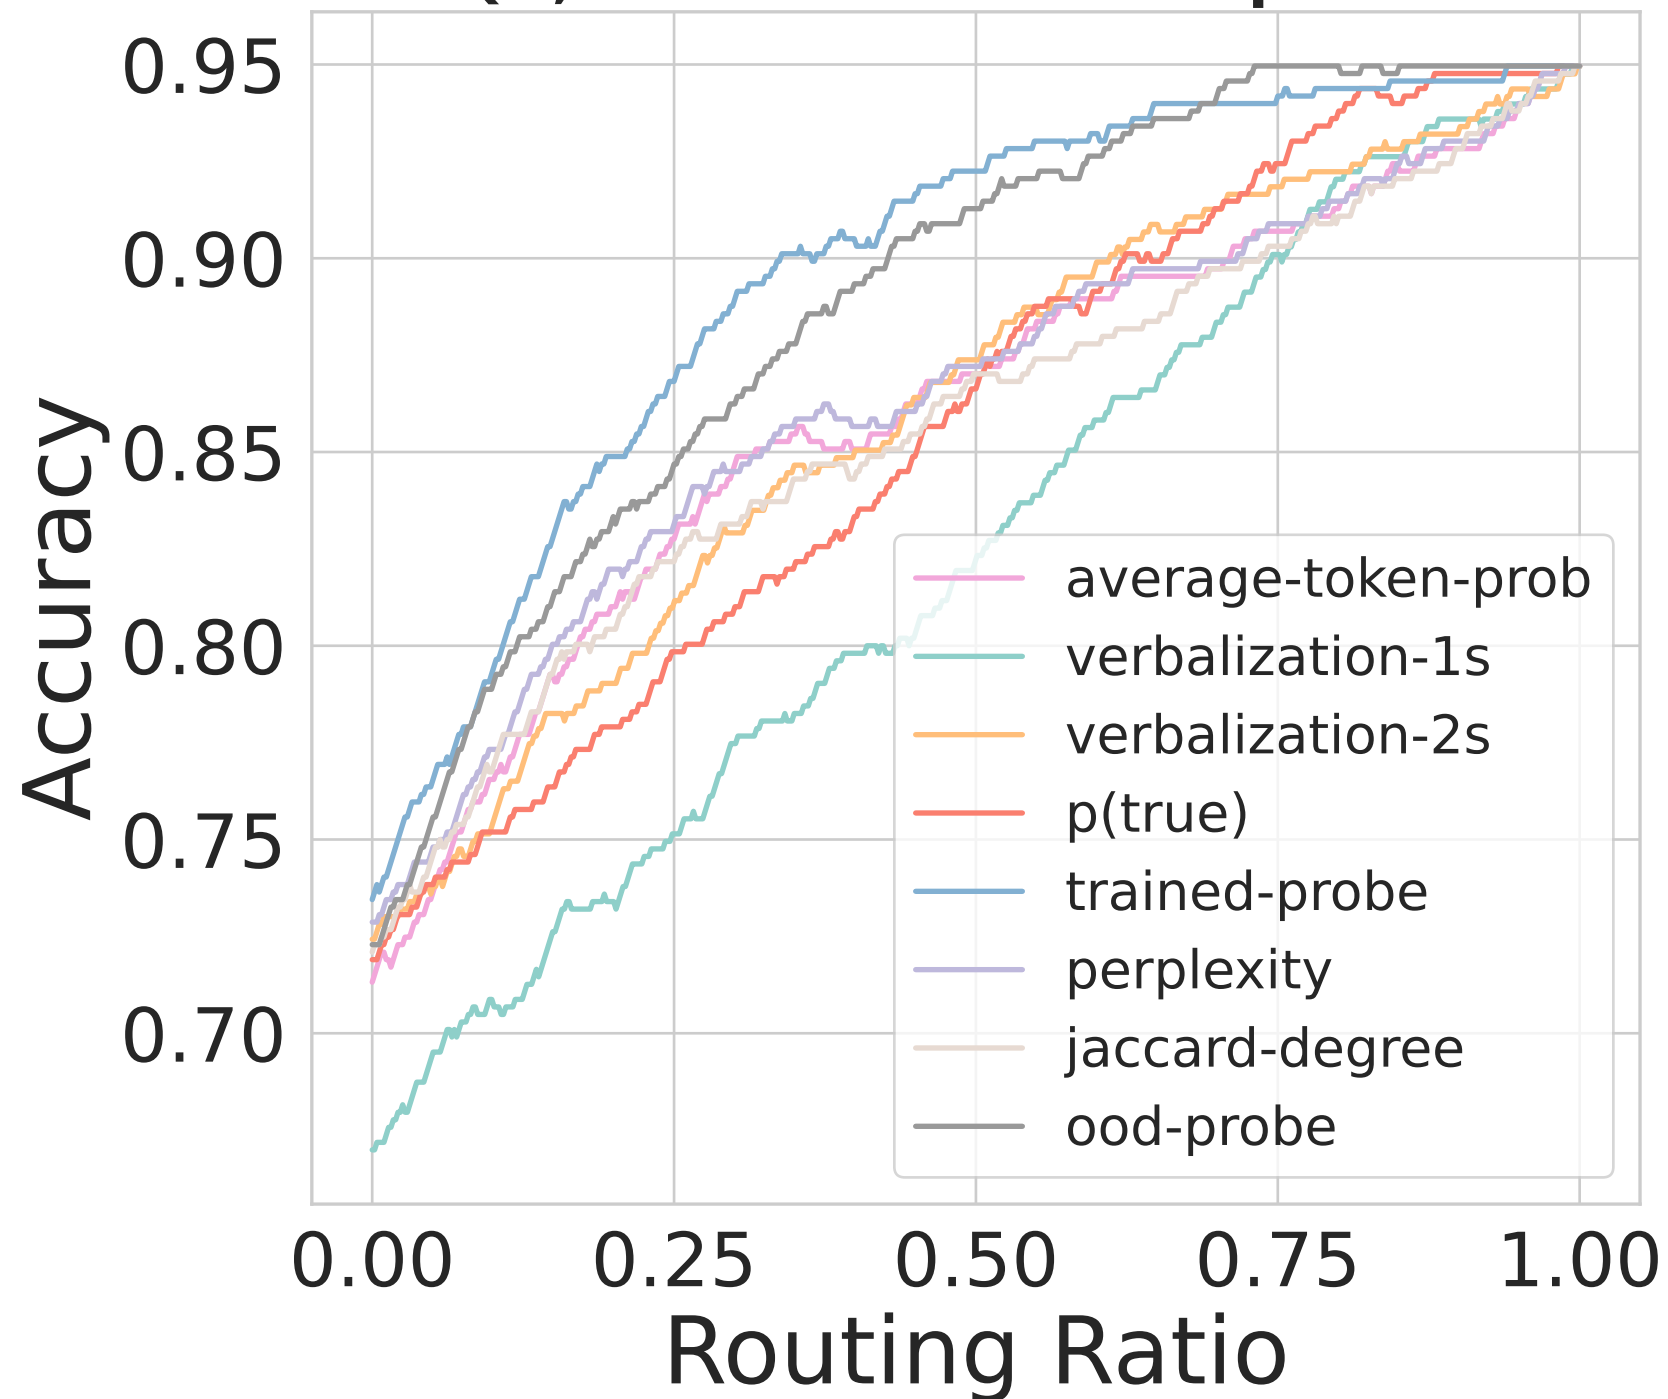

Supplement: supplementary_material [file rr_acc_pi_qa_llama-3.2-3b_dsR1.pdf › Routing_SLM_LLMs/Uncertainty-based Routing/w_legend/to_dsR1/rr_acc_pi_qa_llama-3.2-3b_dsR1.pdf]

**PIQA, mistral-7b to DeepSeek-R1**

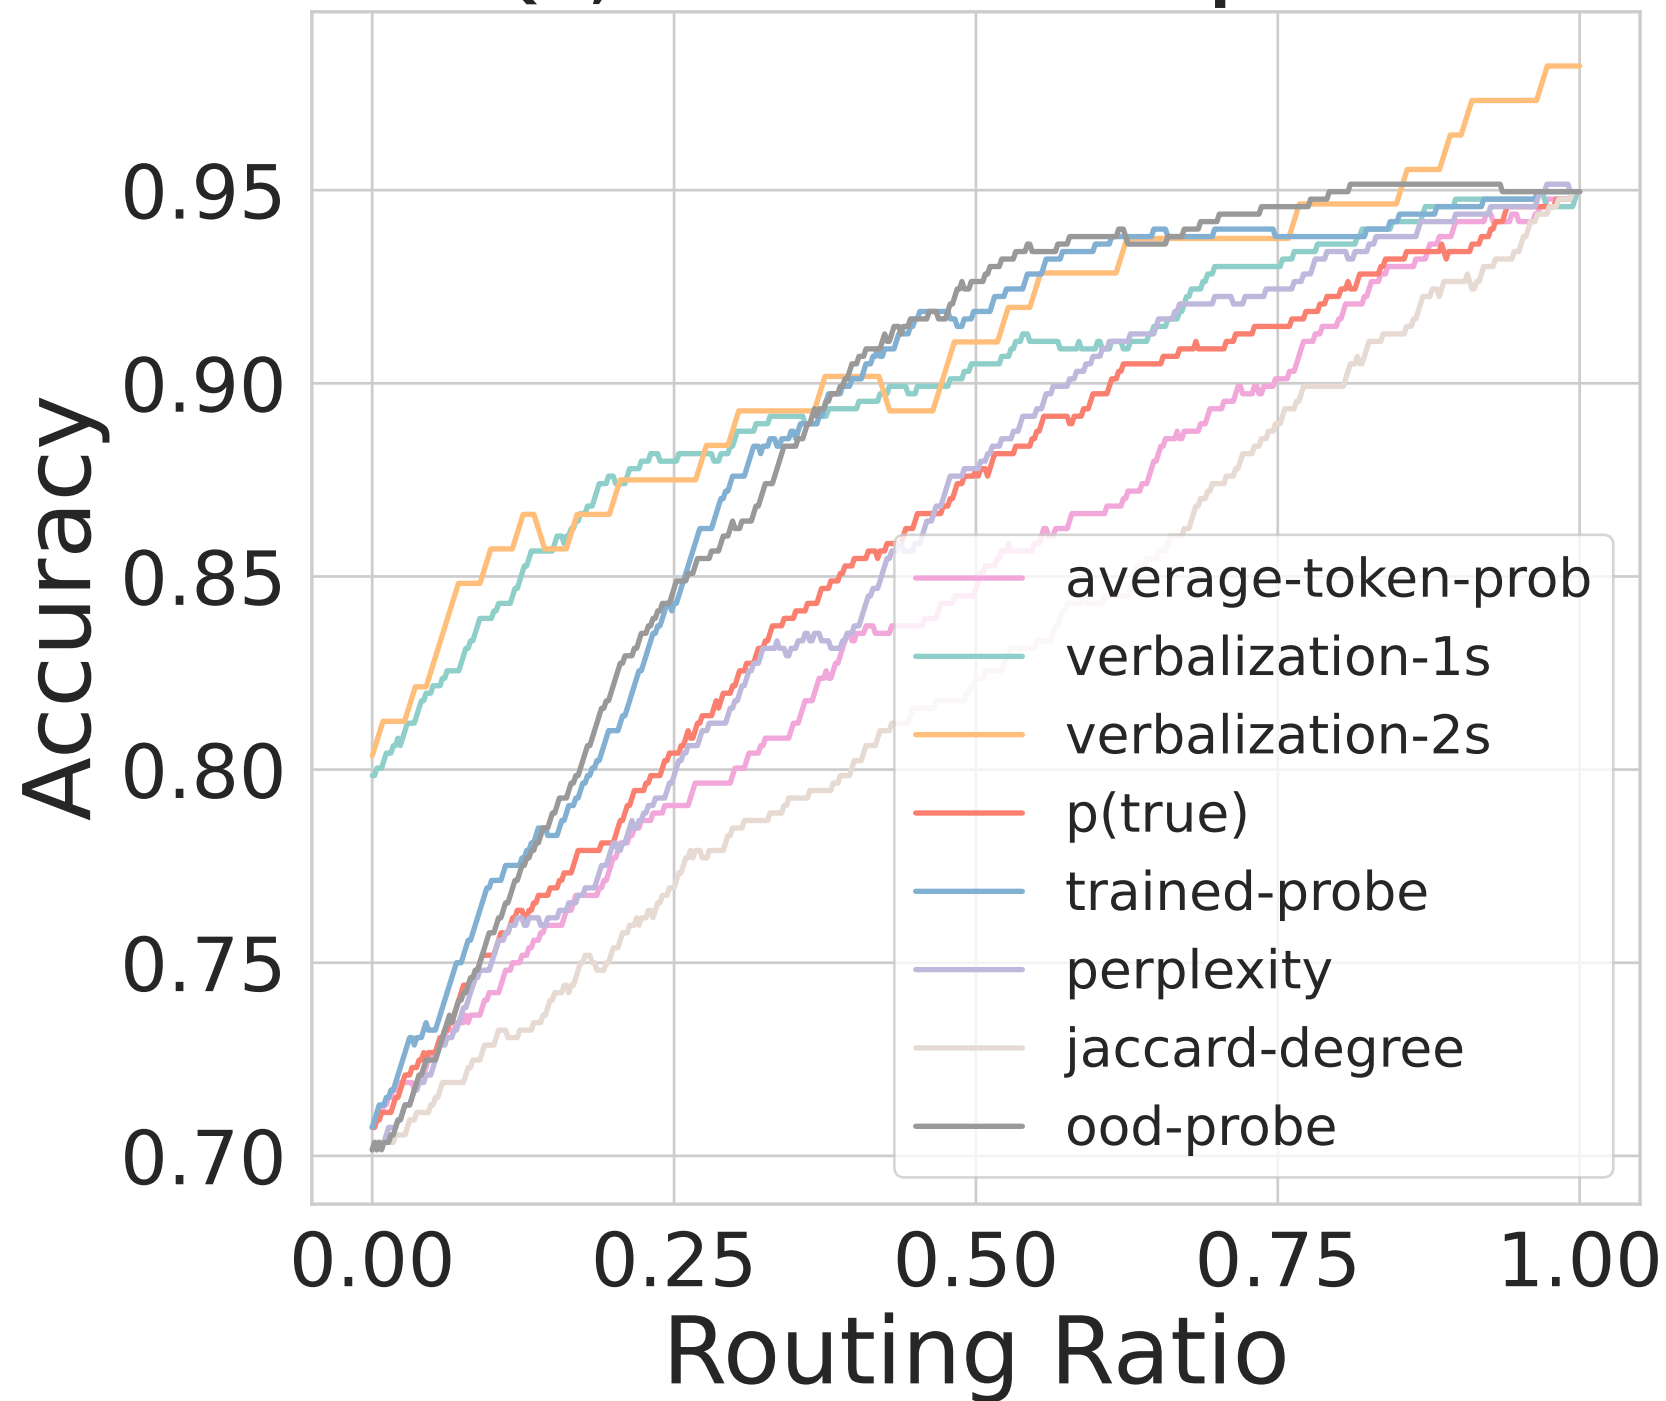

Supplement: supplementary_material [file rr_acc_pi_qa_mistral-7b_dsR1.pdf › Routing_SLM_LLMs/Uncertainty-based Routing/w_legend/to_dsR1/rr_acc_pi_qa_mistral-7b_dsR1.pdf]

**PIQA, phi-3.5-mini to DeepSeek-R1**

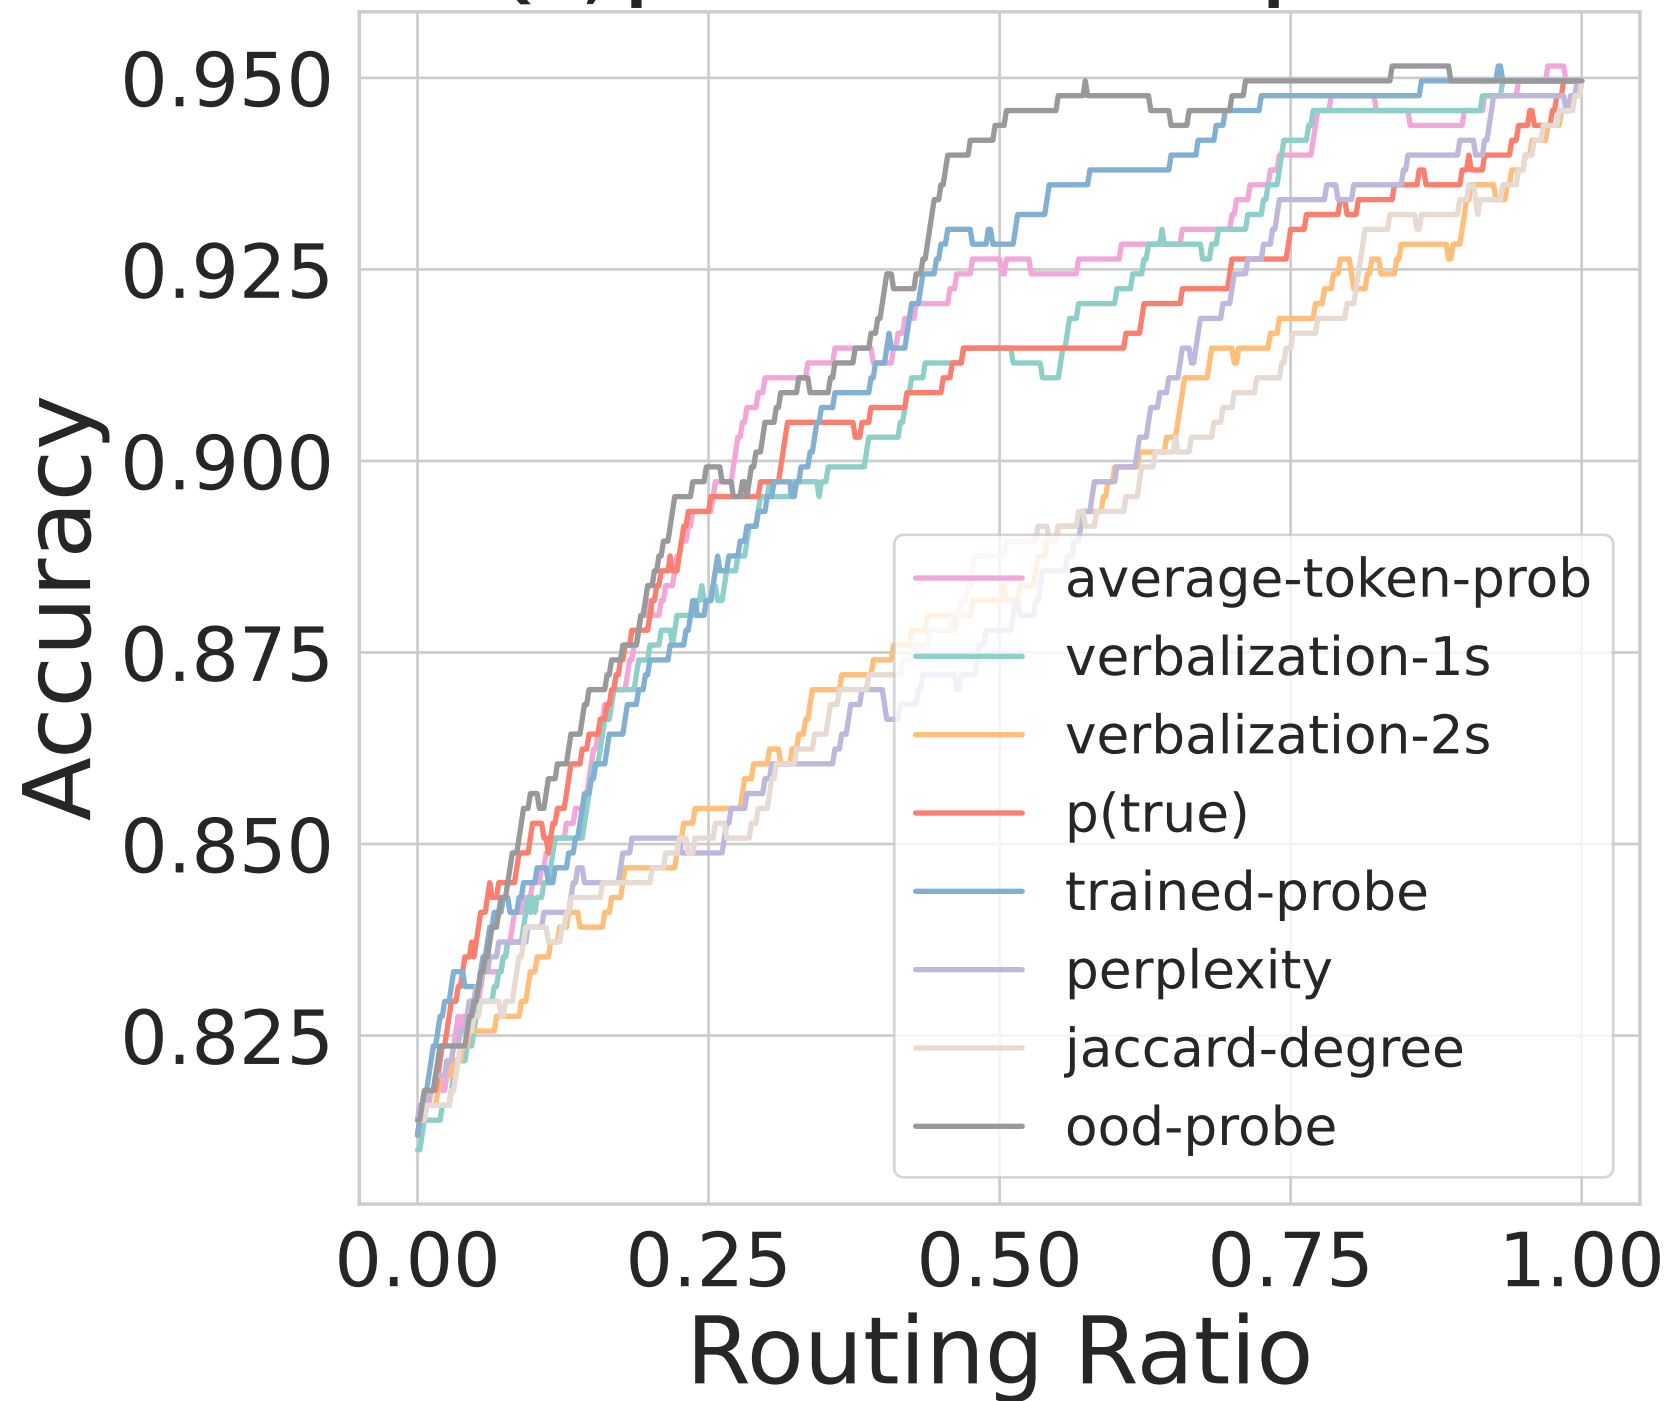

Supplement: supplementary_material [file rr_acc_pi_qa_phi-3.5-mini_dsR1.pdf › Routing_SLM_LLMs/Uncertainty-based Routing/w_legend/to_dsR1/rr_acc_pi_qa_phi-3.5-mini_dsR1.pdf]

**PIQA, qwen-2.5-7b to DeepSeek-R1**

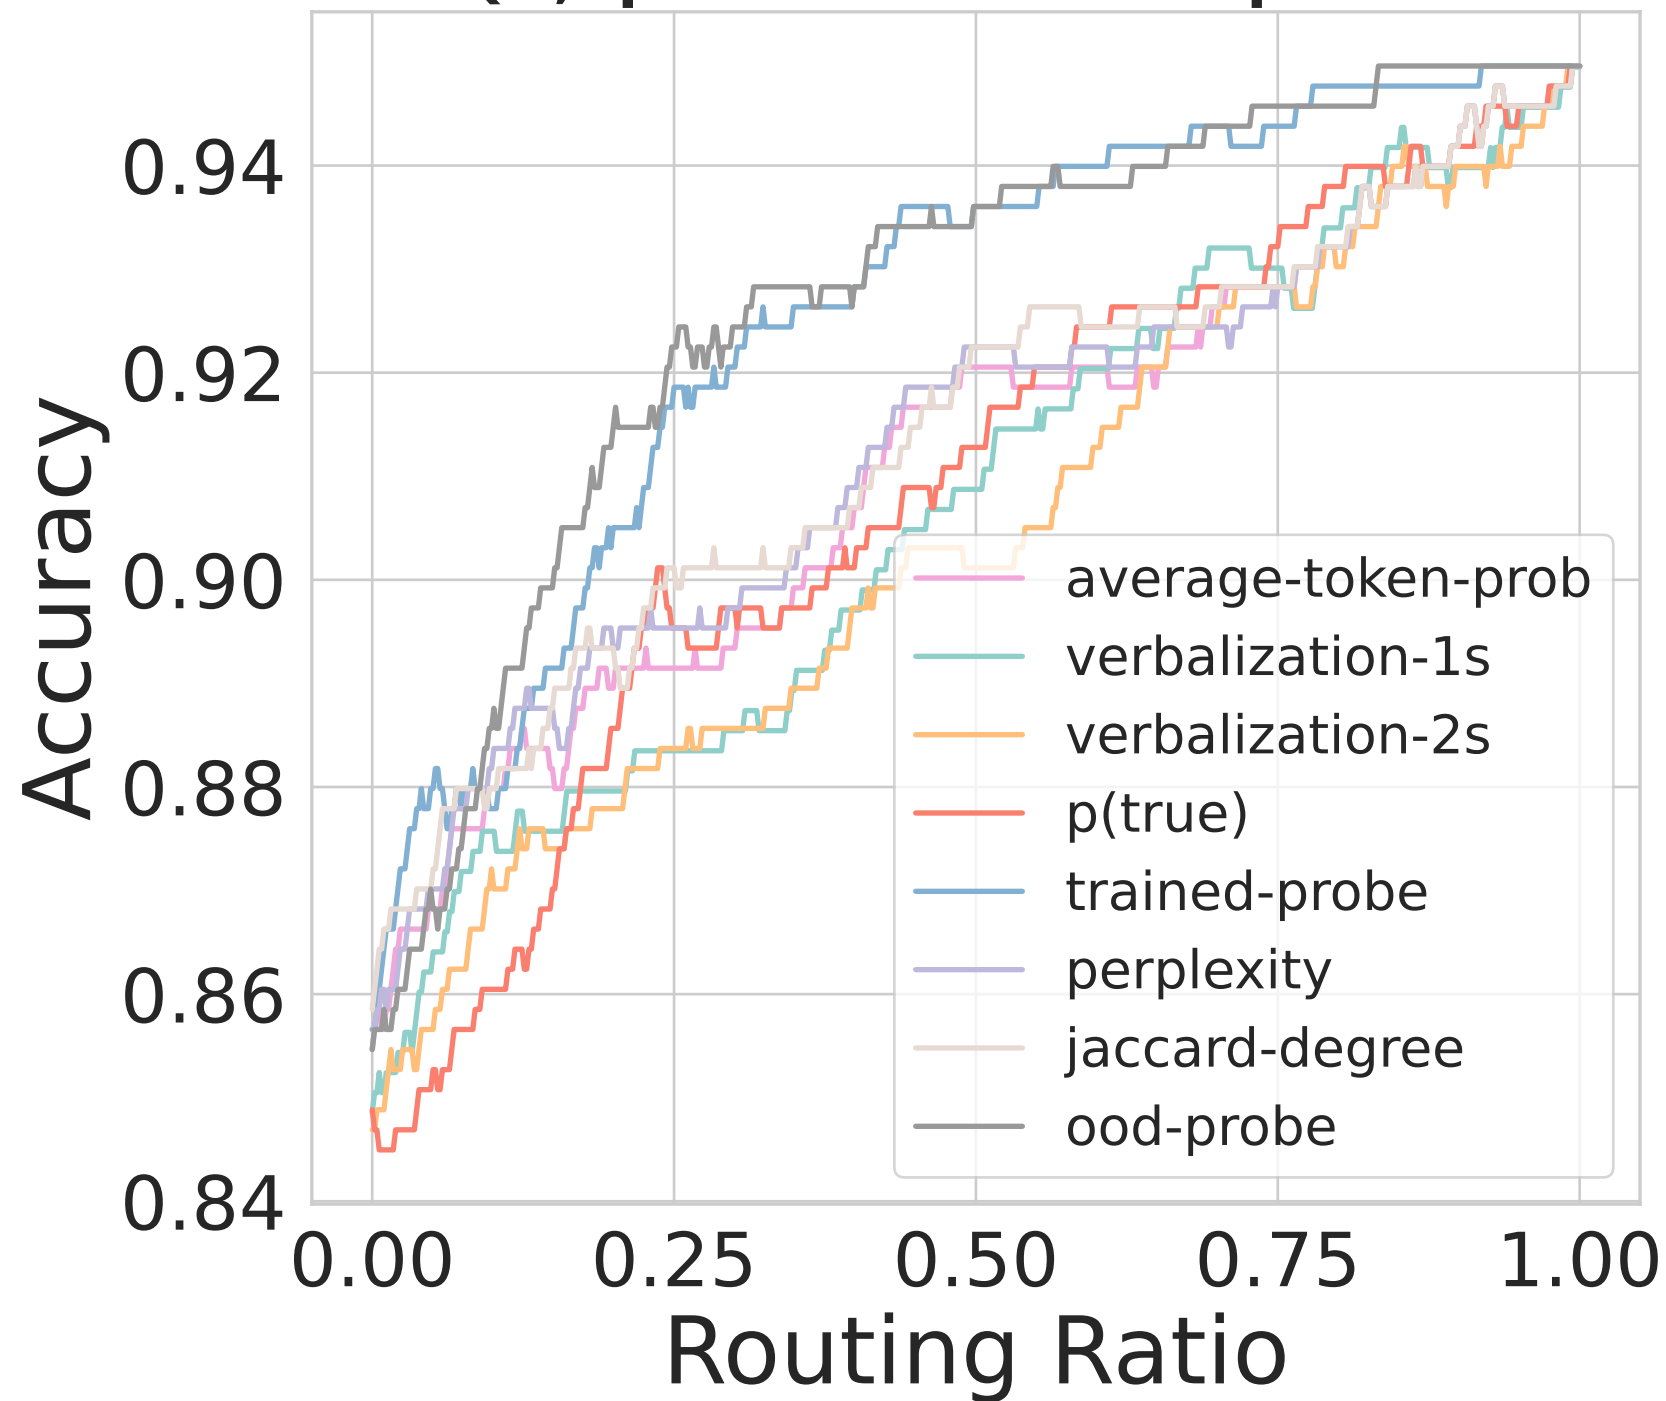

Supplement: supplementary_material [file rr_acc_pi_qa_qwen-2.5-7b_dsR1.pdf › Routing_SLM_LLMs/Uncertainty-based Routing/w_legend/to_dsR1/rr_acc_pi_qa_qwen-2.5-7b_dsR1.pdf]

# PIQA, rwkv to DeepSeek-R1

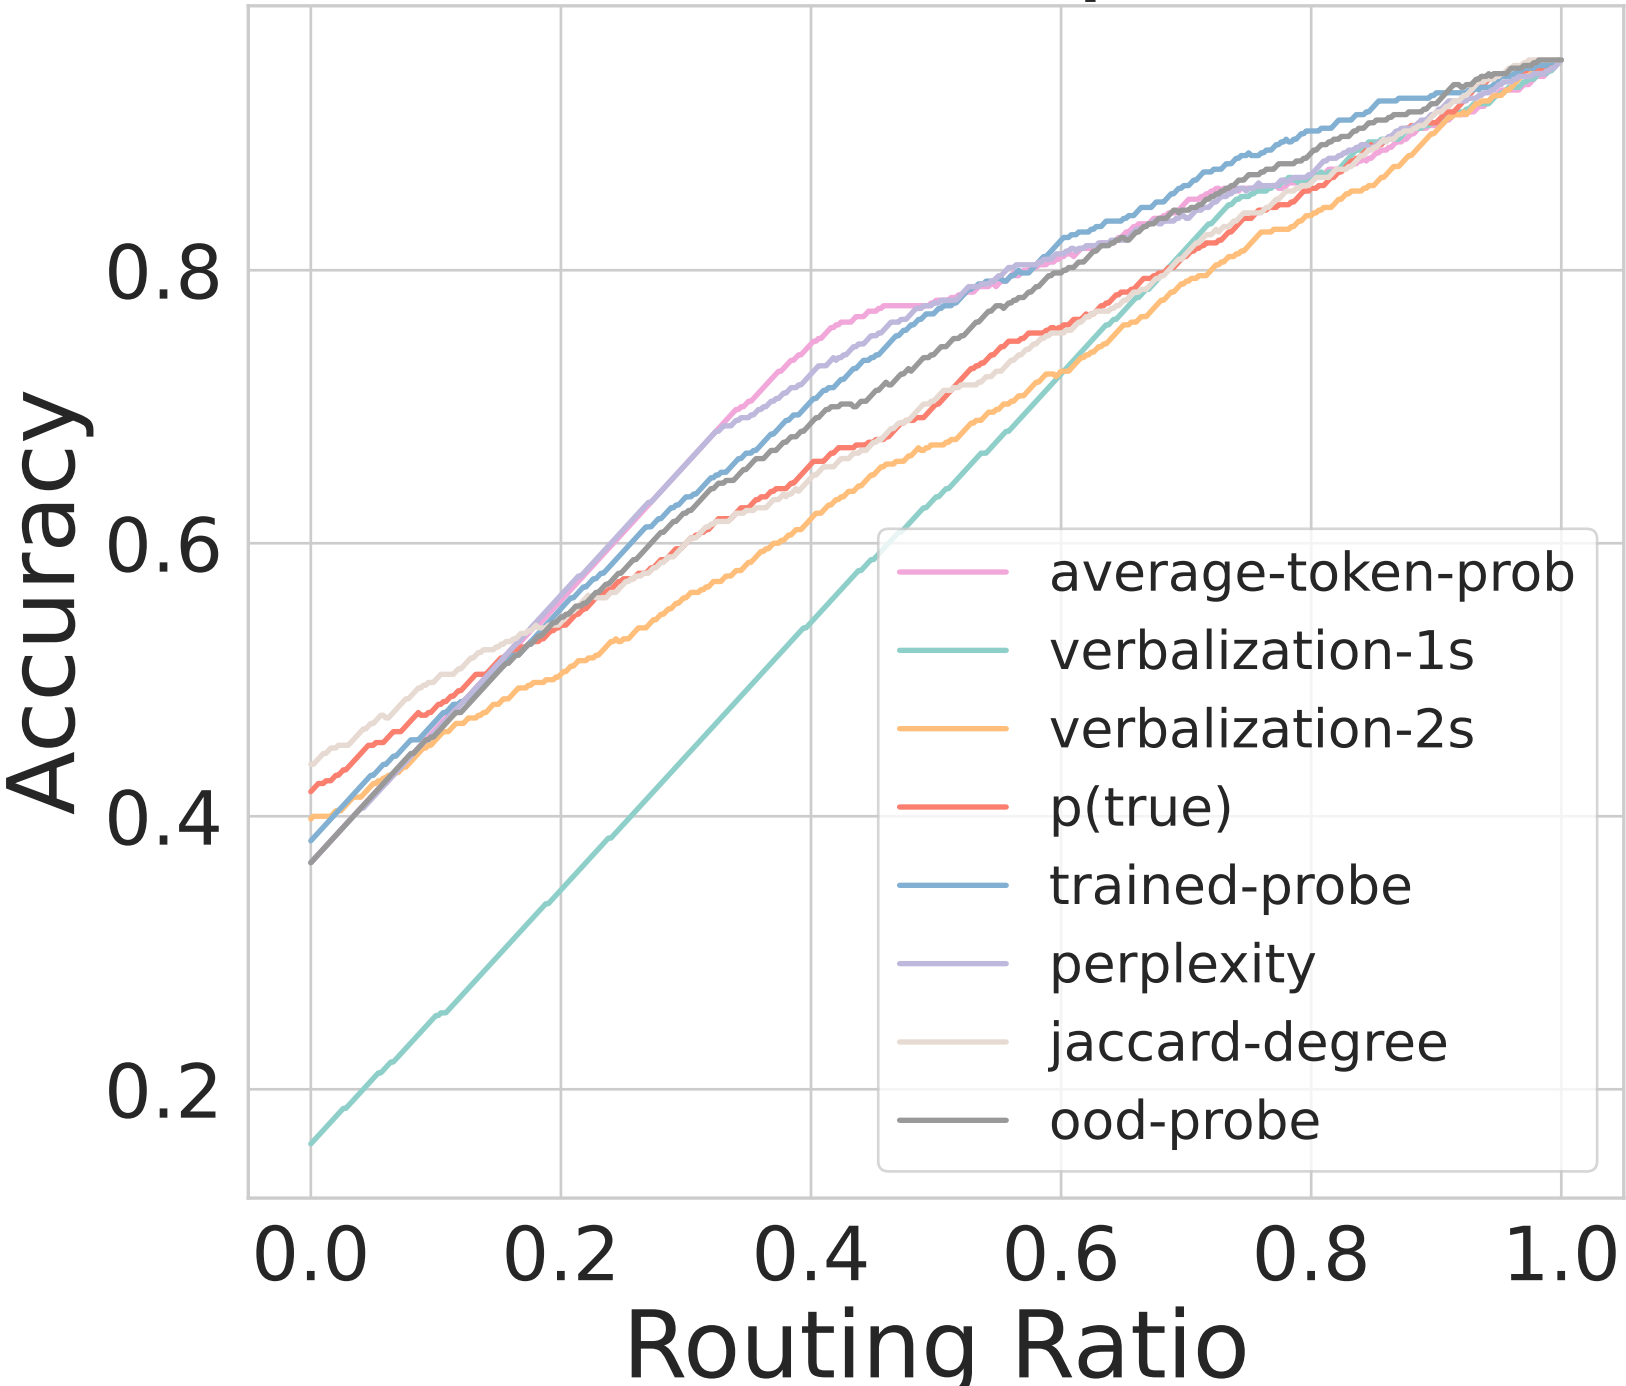

Supplement: supplementary_material [file rr_acc_pi_qa_rwkv_dsR1.pdf › Routing_SLM_LLMs/Uncertainty-based Routing/w_legend/to_dsR1/rr_acc_pi_qa_rwkv_dsR1.pdf]

## Social IQa, Qwen3-0.6B to DeepSeek-R1

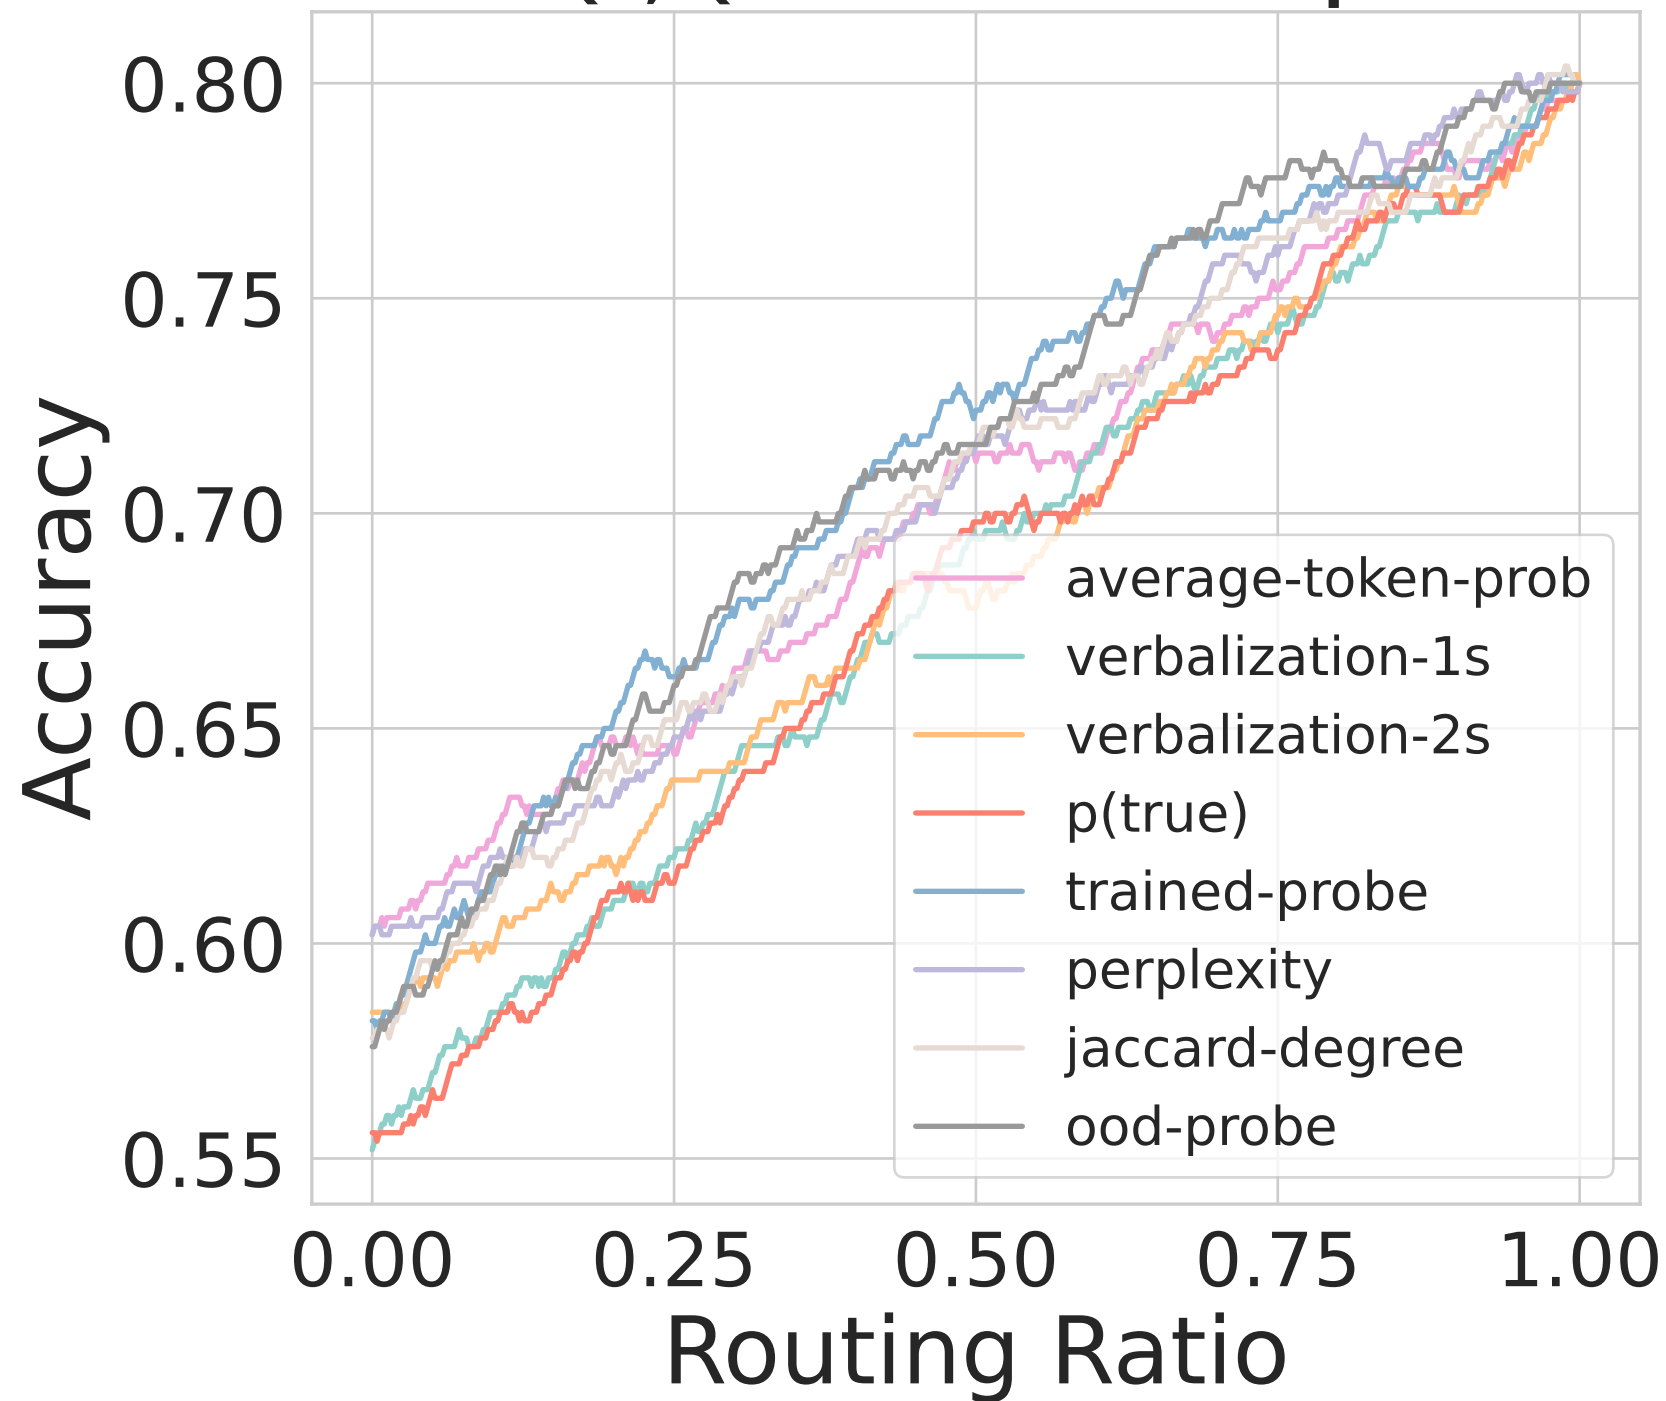

Supplement: supplementary_material [file rr_acc_social_i_qa_Qwen3-0.6B_dsR1.pdf › Routing_SLM_LLMs/Uncertainty-based Routing/w_legend/to_dsR1/rr_acc_social_i_qa_Qwen3-0.6B_dsR1.pdf]

# Social IQa, Qwen3-1.7B to DeepSeek-R1

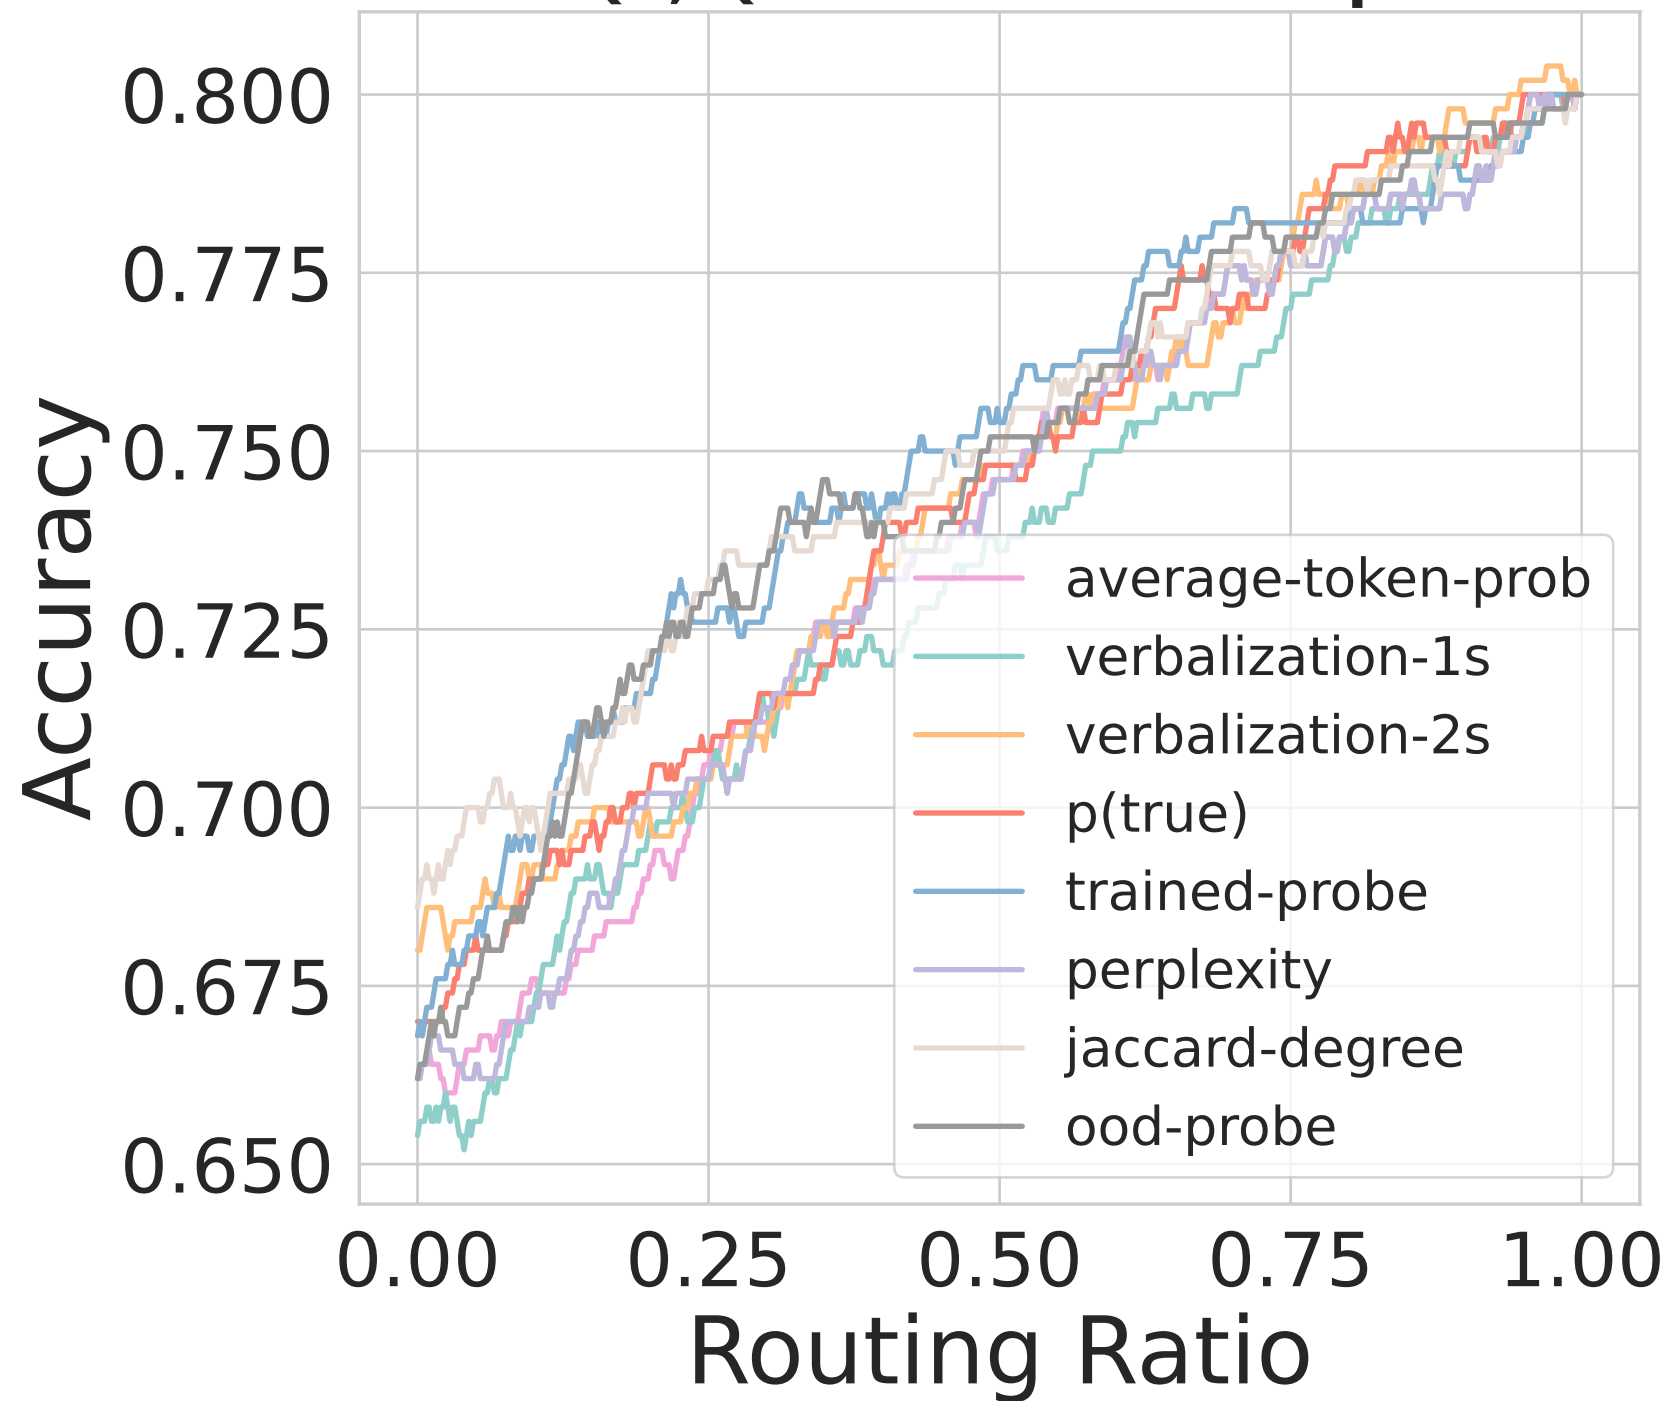

Supplement: supplementary_material [file rr_acc_social_i_qa_Qwen3-1.7B_dsR1.pdf › Routing_SLM_LLMs/Uncertainty-based Routing/w_legend/to_dsR1/rr_acc_social_i_qa_Qwen3-1.7B_dsR1.pdf]

**Social IQa, Qwen3-4B to DeepSeek-R1**

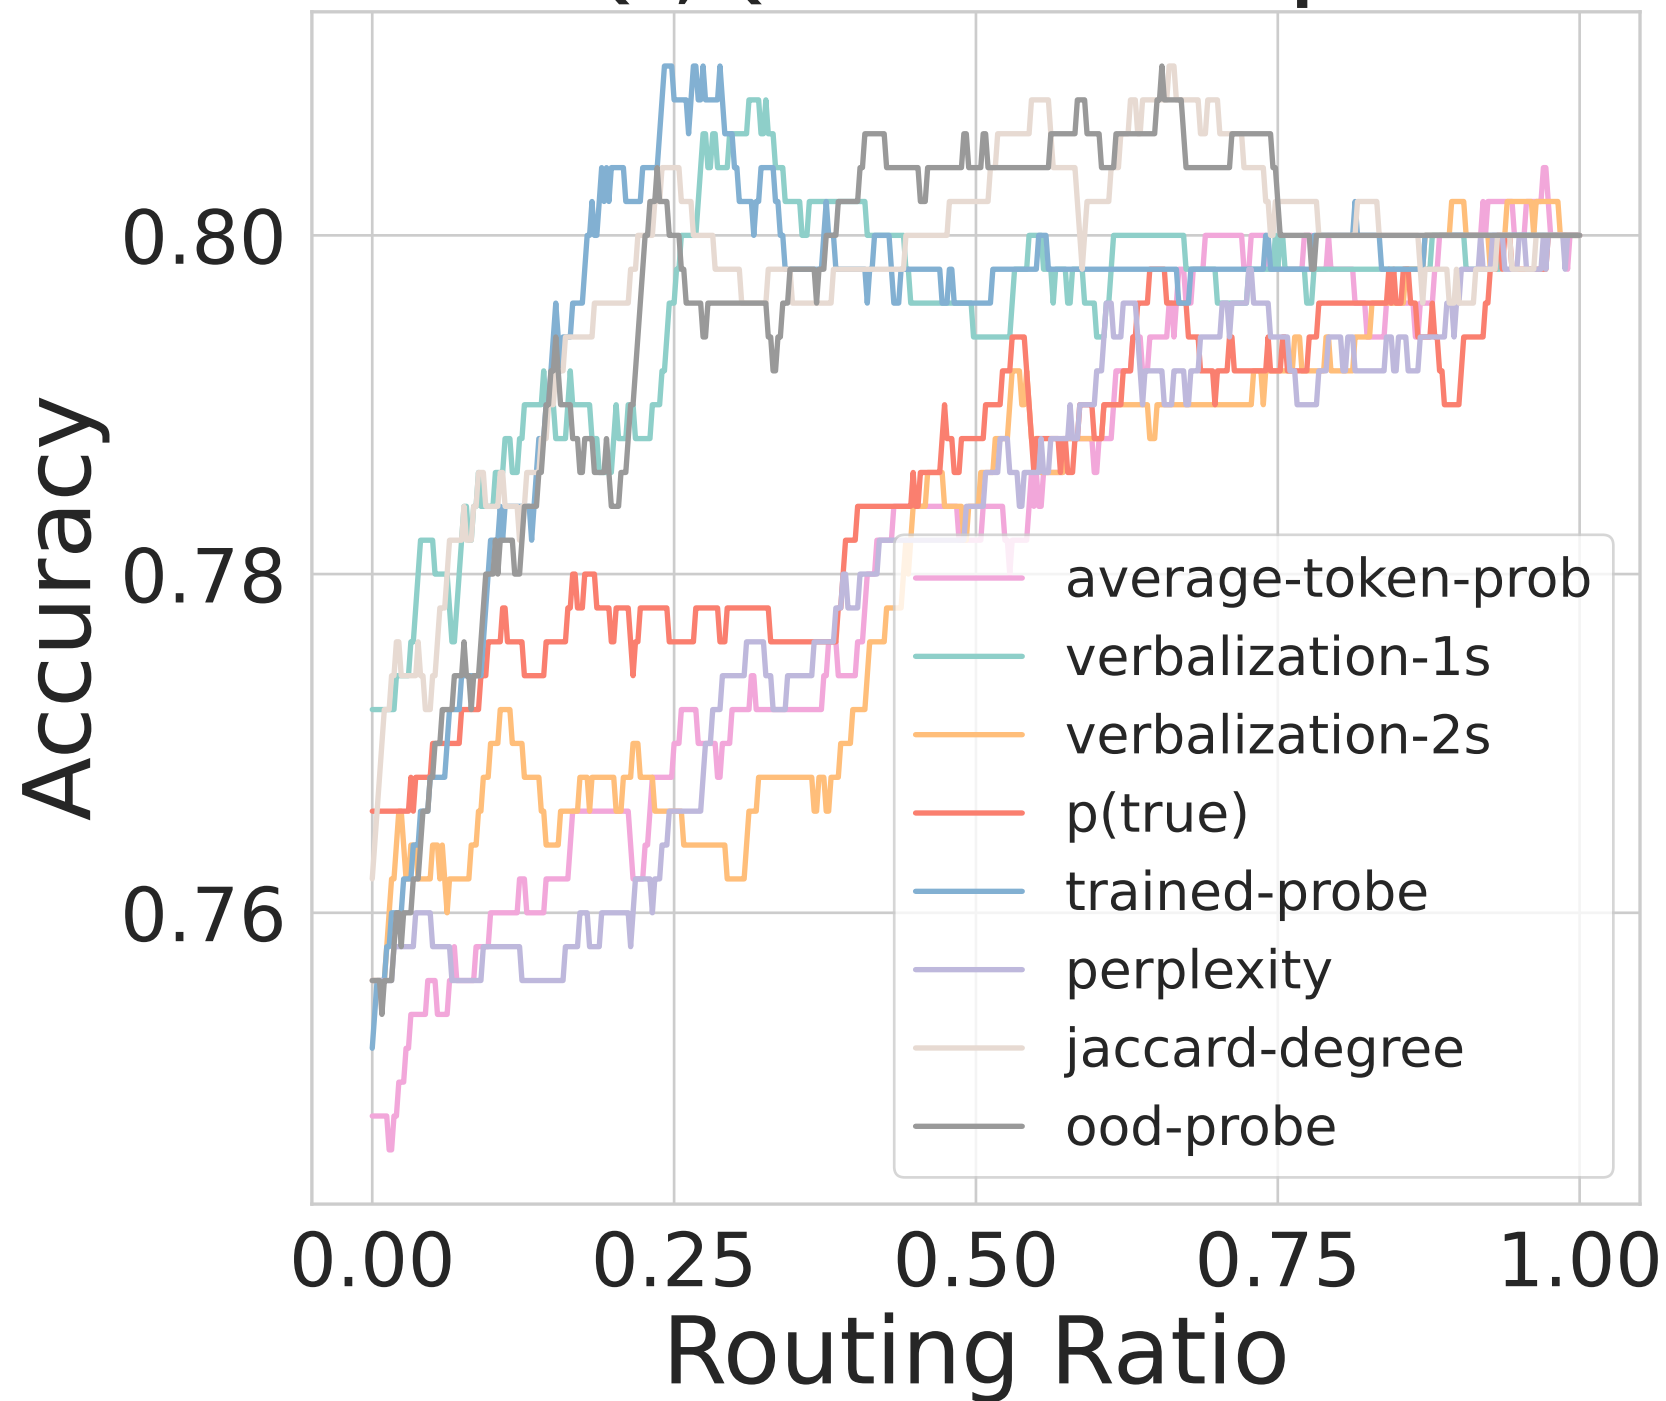

Supplement: supplementary_material [file rr_acc_social_i_qa_Qwen3-4B_dsR1.pdf › Routing_SLM_LLMs/Uncertainty-based Routing/w_legend/to_dsR1/rr_acc_social_i_qa_Qwen3-4B_dsR1.pdf]

**Social IQa, granite-3.1-8b to DeepSeek-R1**

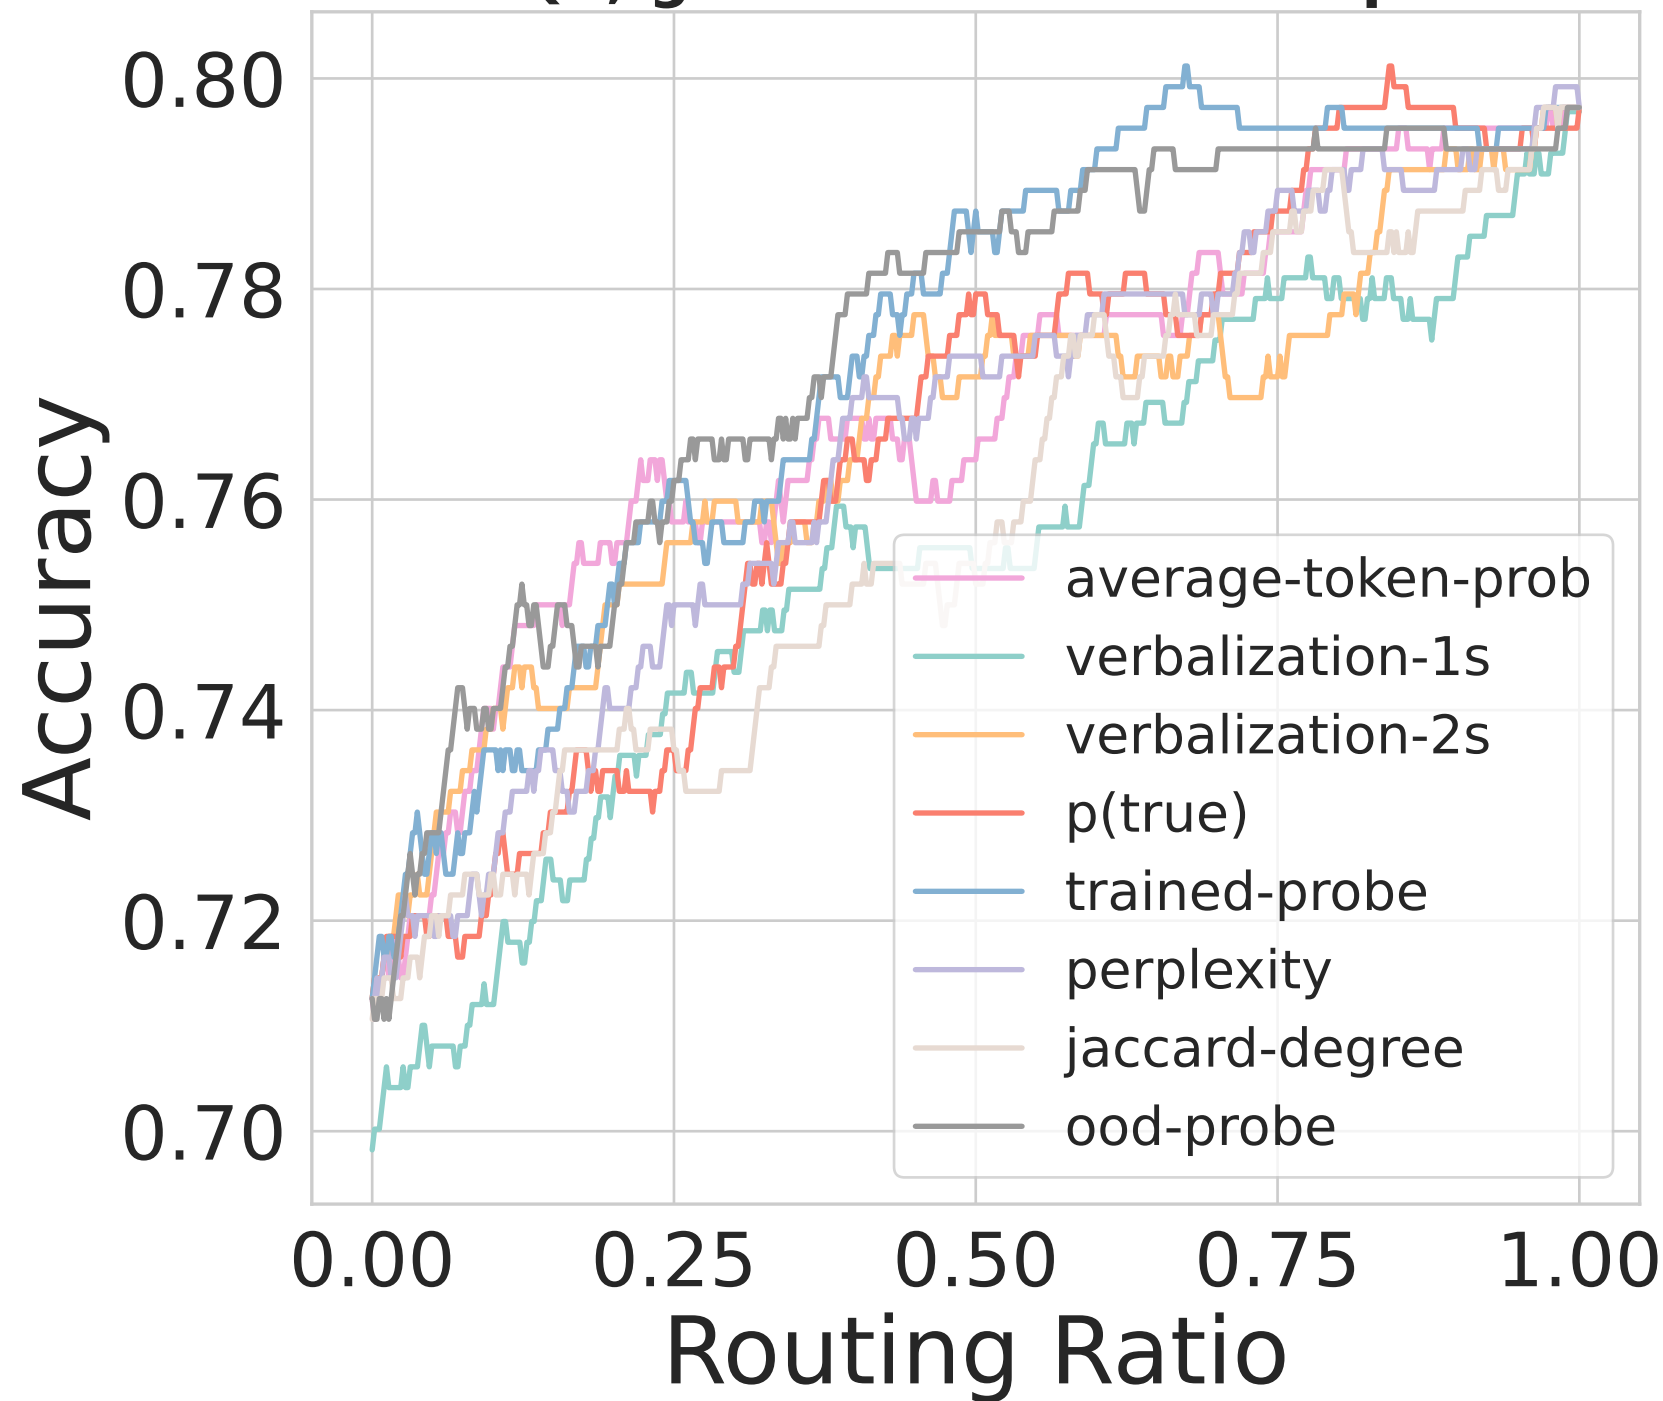

Supplement: supplementary_material [file rr_acc_social_i_qa_granite-3.1-8b_dsR1.pdf › Routing_SLM_LLMs/Uncertainty-based Routing/w_legend/to_dsR1/rr_acc_social_i_qa_granite-3.1-8b_dsR1.pdf]

**Social IQa, llama-3.2-1b to DeepSeek-R1**

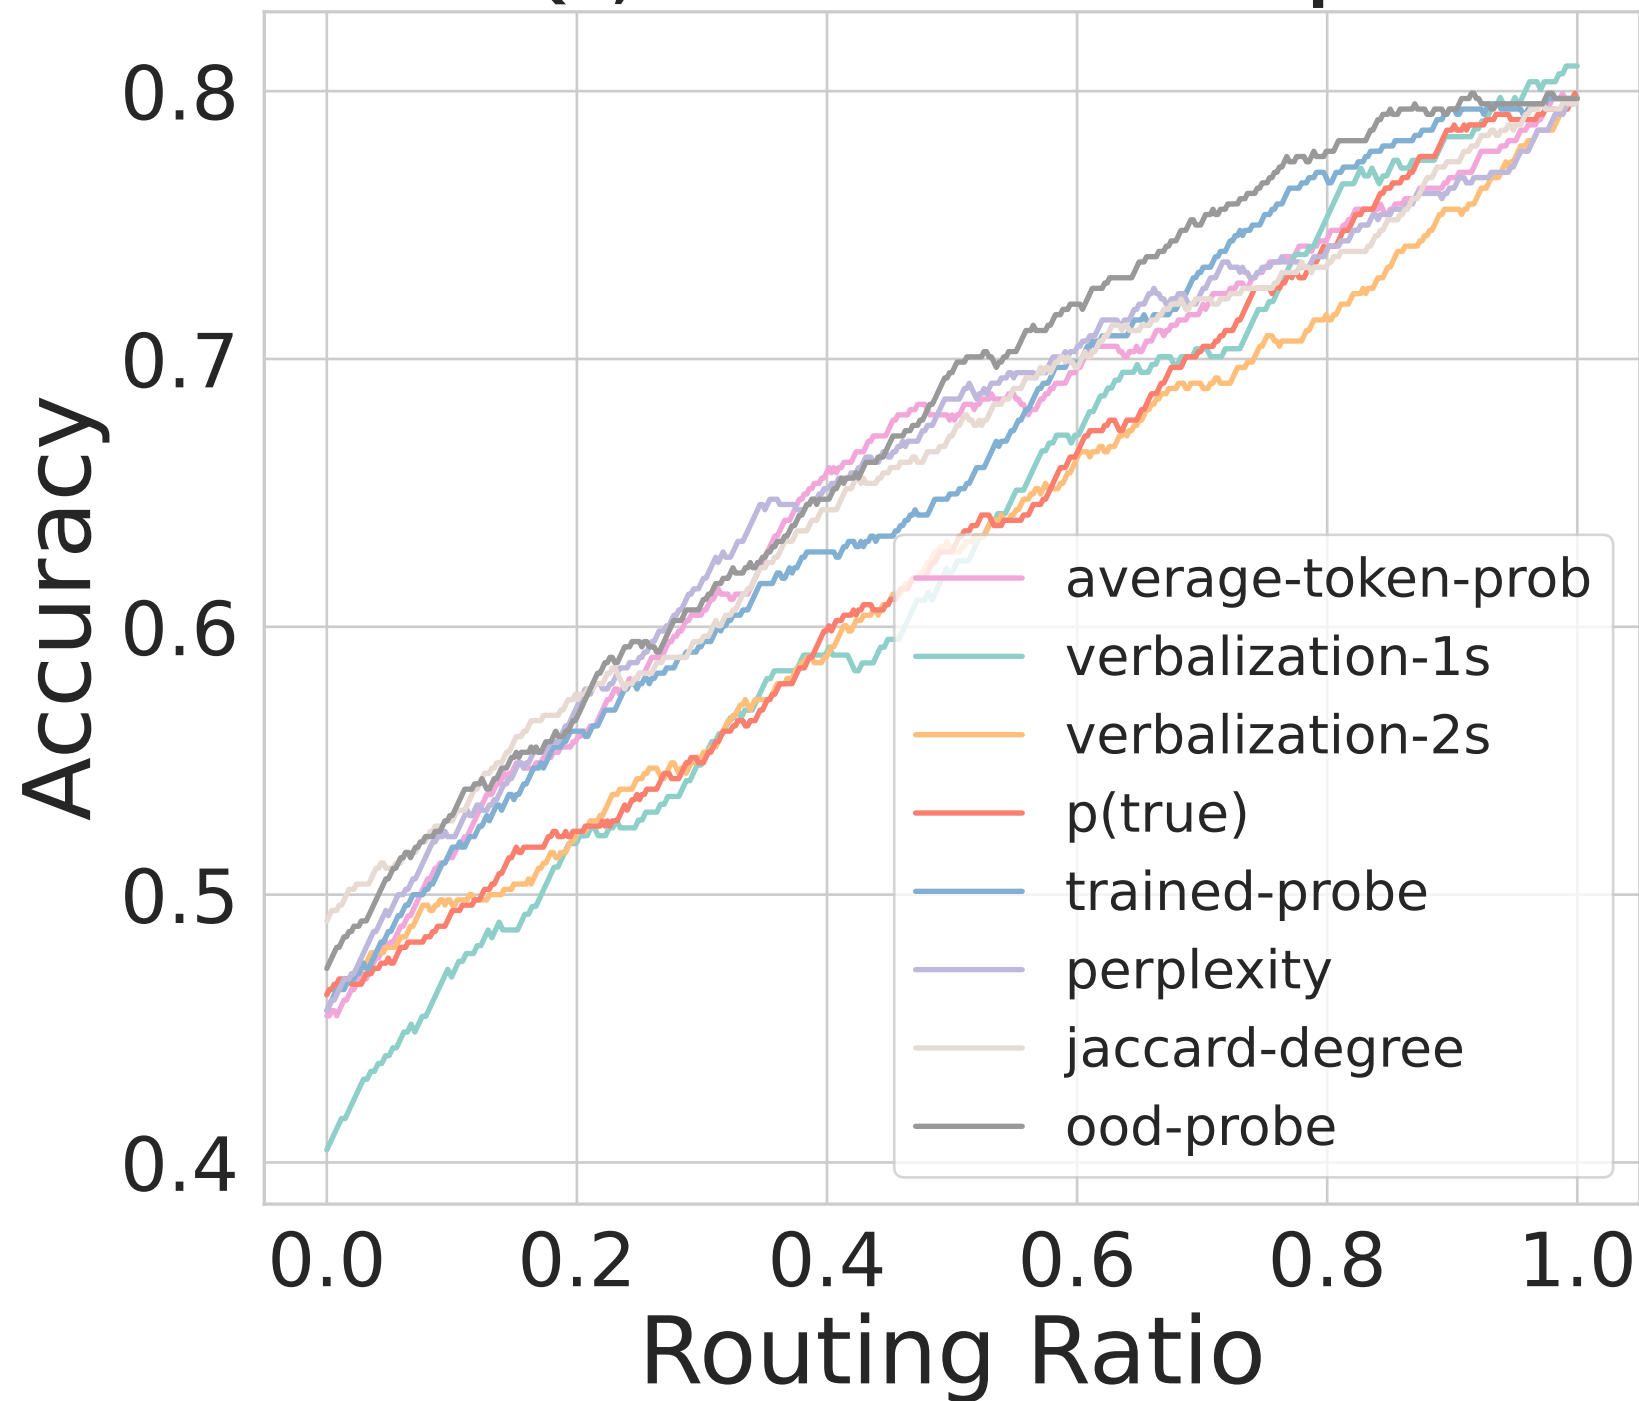

Supplement: supplementary_material [file rr_acc_social_i_qa_llama-3.2-1b_dsR1.pdf › Routing_SLM_LLMs/Uncertainty-based Routing/w_legend/to_dsR1/rr_acc_social_i_qa_llama-3.2-1b_dsR1.pdf]

# Social IQa, llama-3.2-3b to DeepSeek-R1

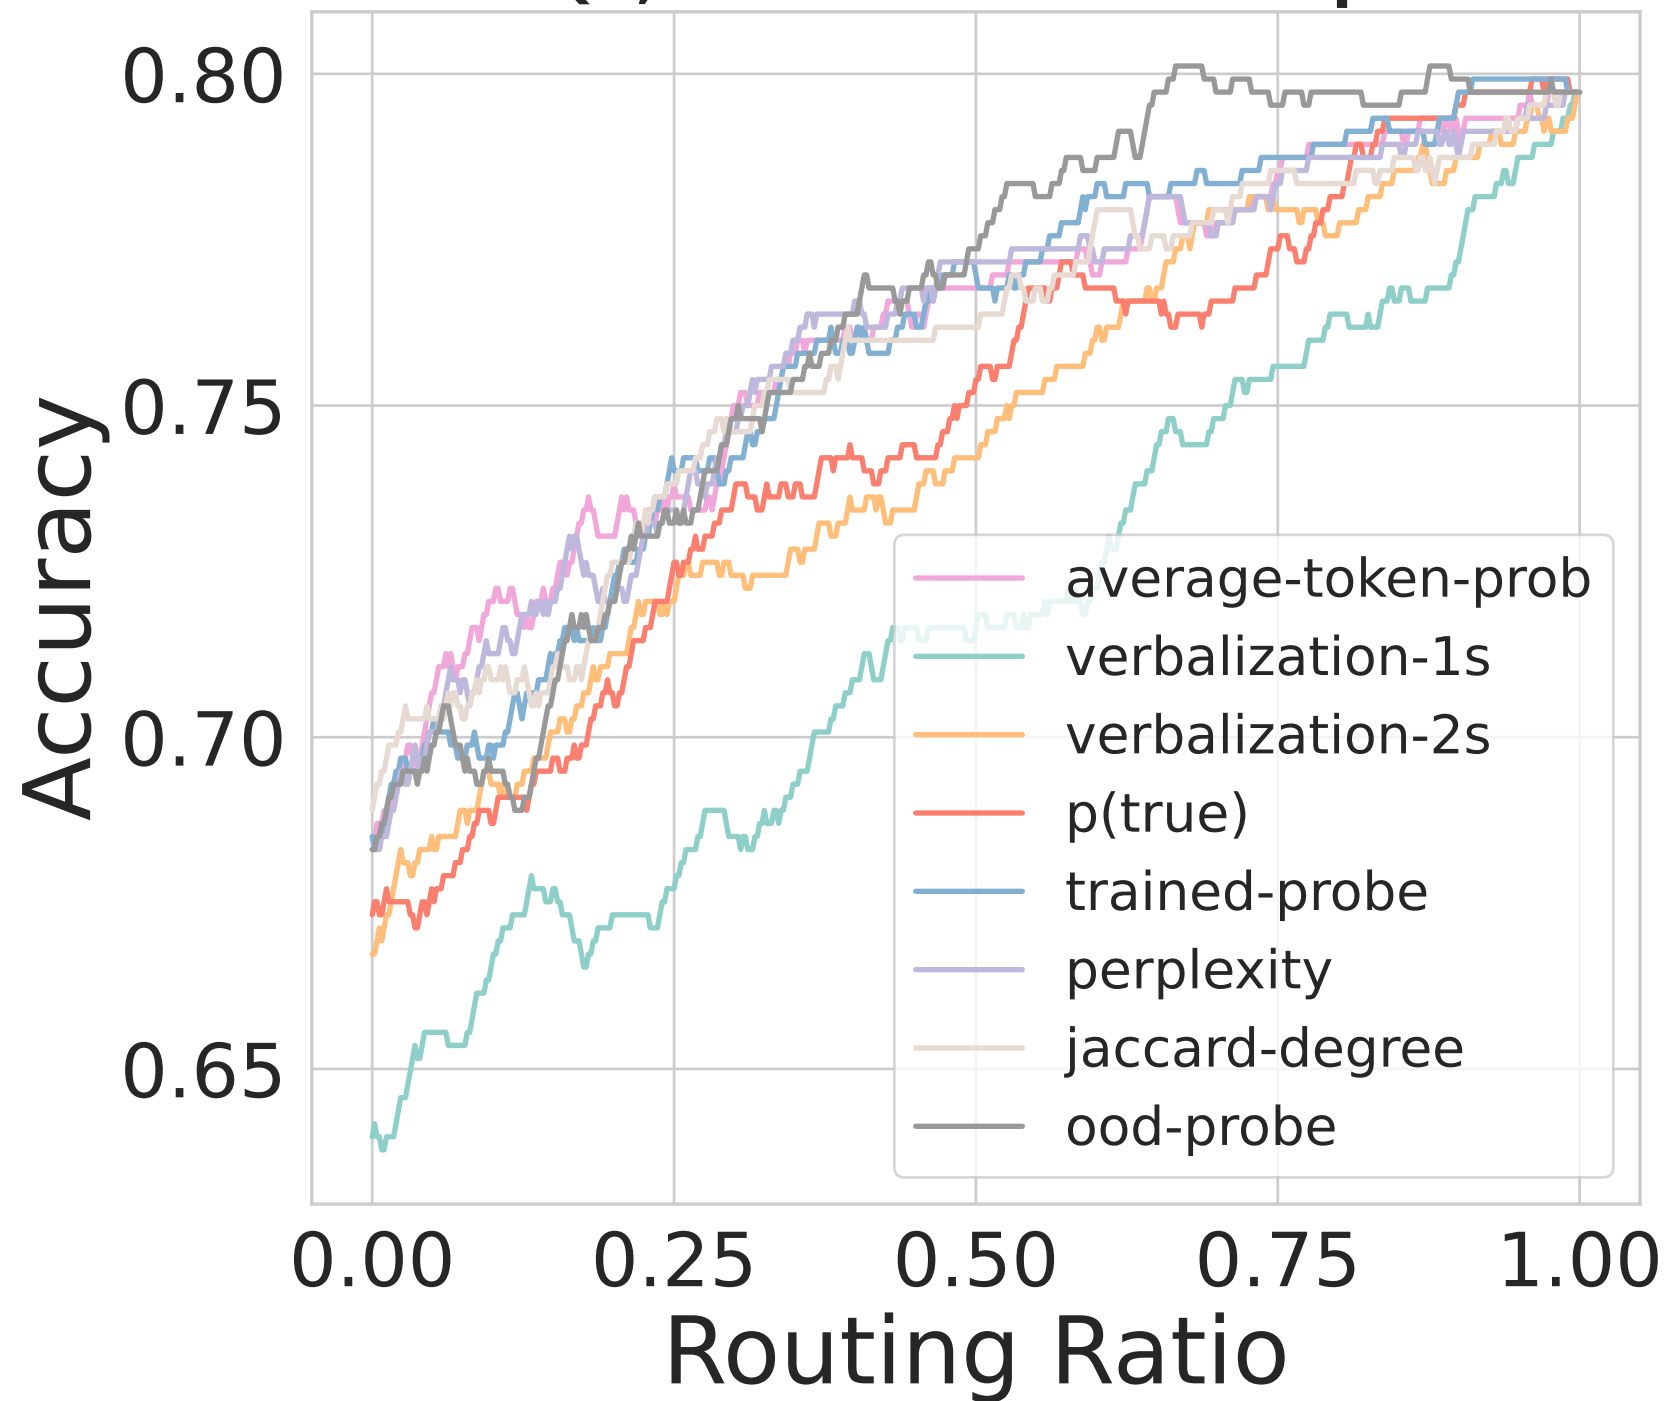

Supplement: supplementary_material [file rr_acc_social_i_qa_llama-3.2-3b_dsR1.pdf › Routing_SLM_LLMs/Uncertainty-based Routing/w_legend/to_dsR1/rr_acc_social_i_qa_llama-3.2-3b_dsR1.pdf]

**Social IQa, mistral-7b to DeepSeek-R1**

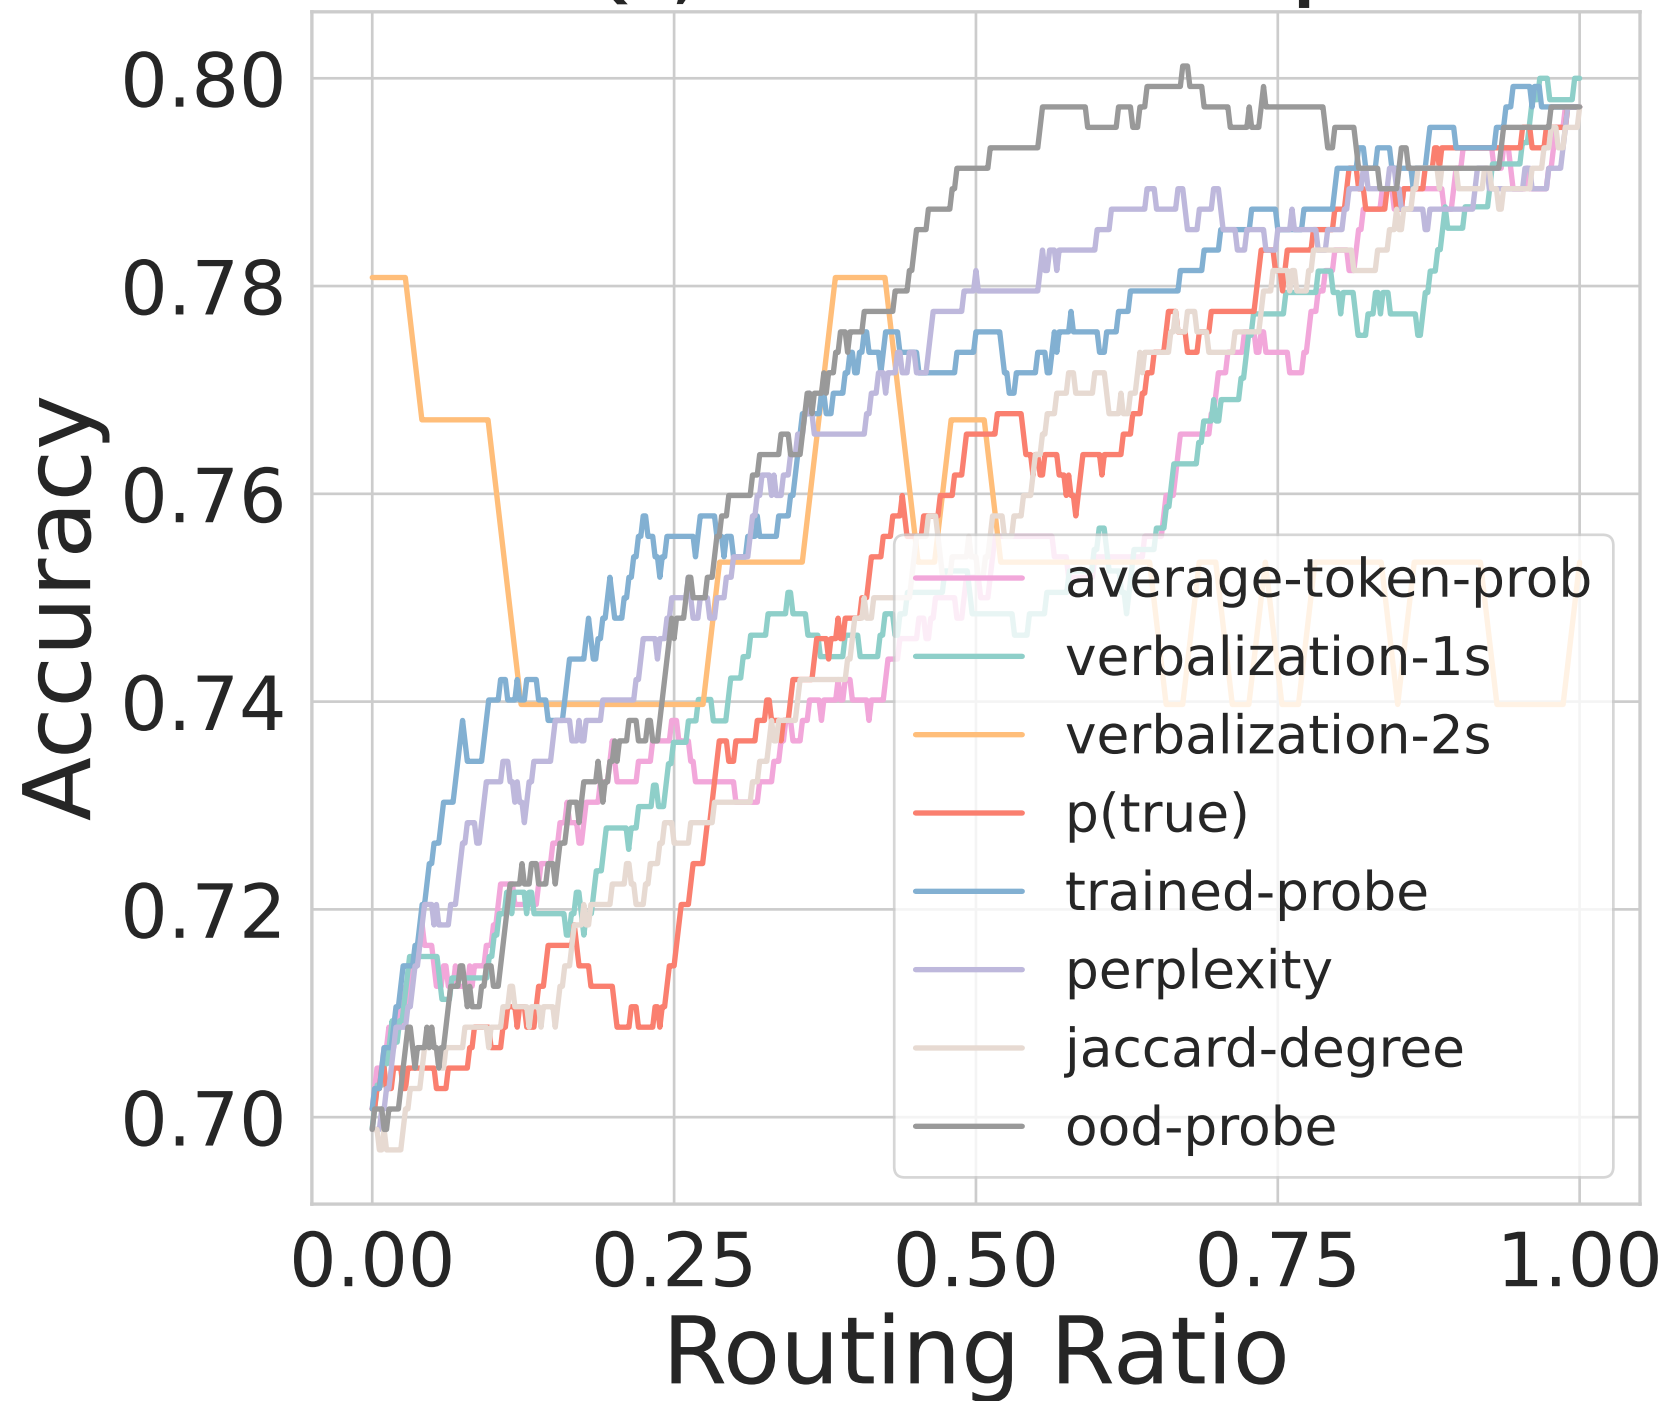

Supplement: supplementary_material [file rr_acc_social_i_qa_mistral-7b_dsR1.pdf › Routing_SLM_LLMs/Uncertainty-based Routing/w_legend/to_dsR1/rr_acc_social_i_qa_mistral-7b_dsR1.pdf]

**Social IQa, phi-3.5-mini to DeepSeek-R1**

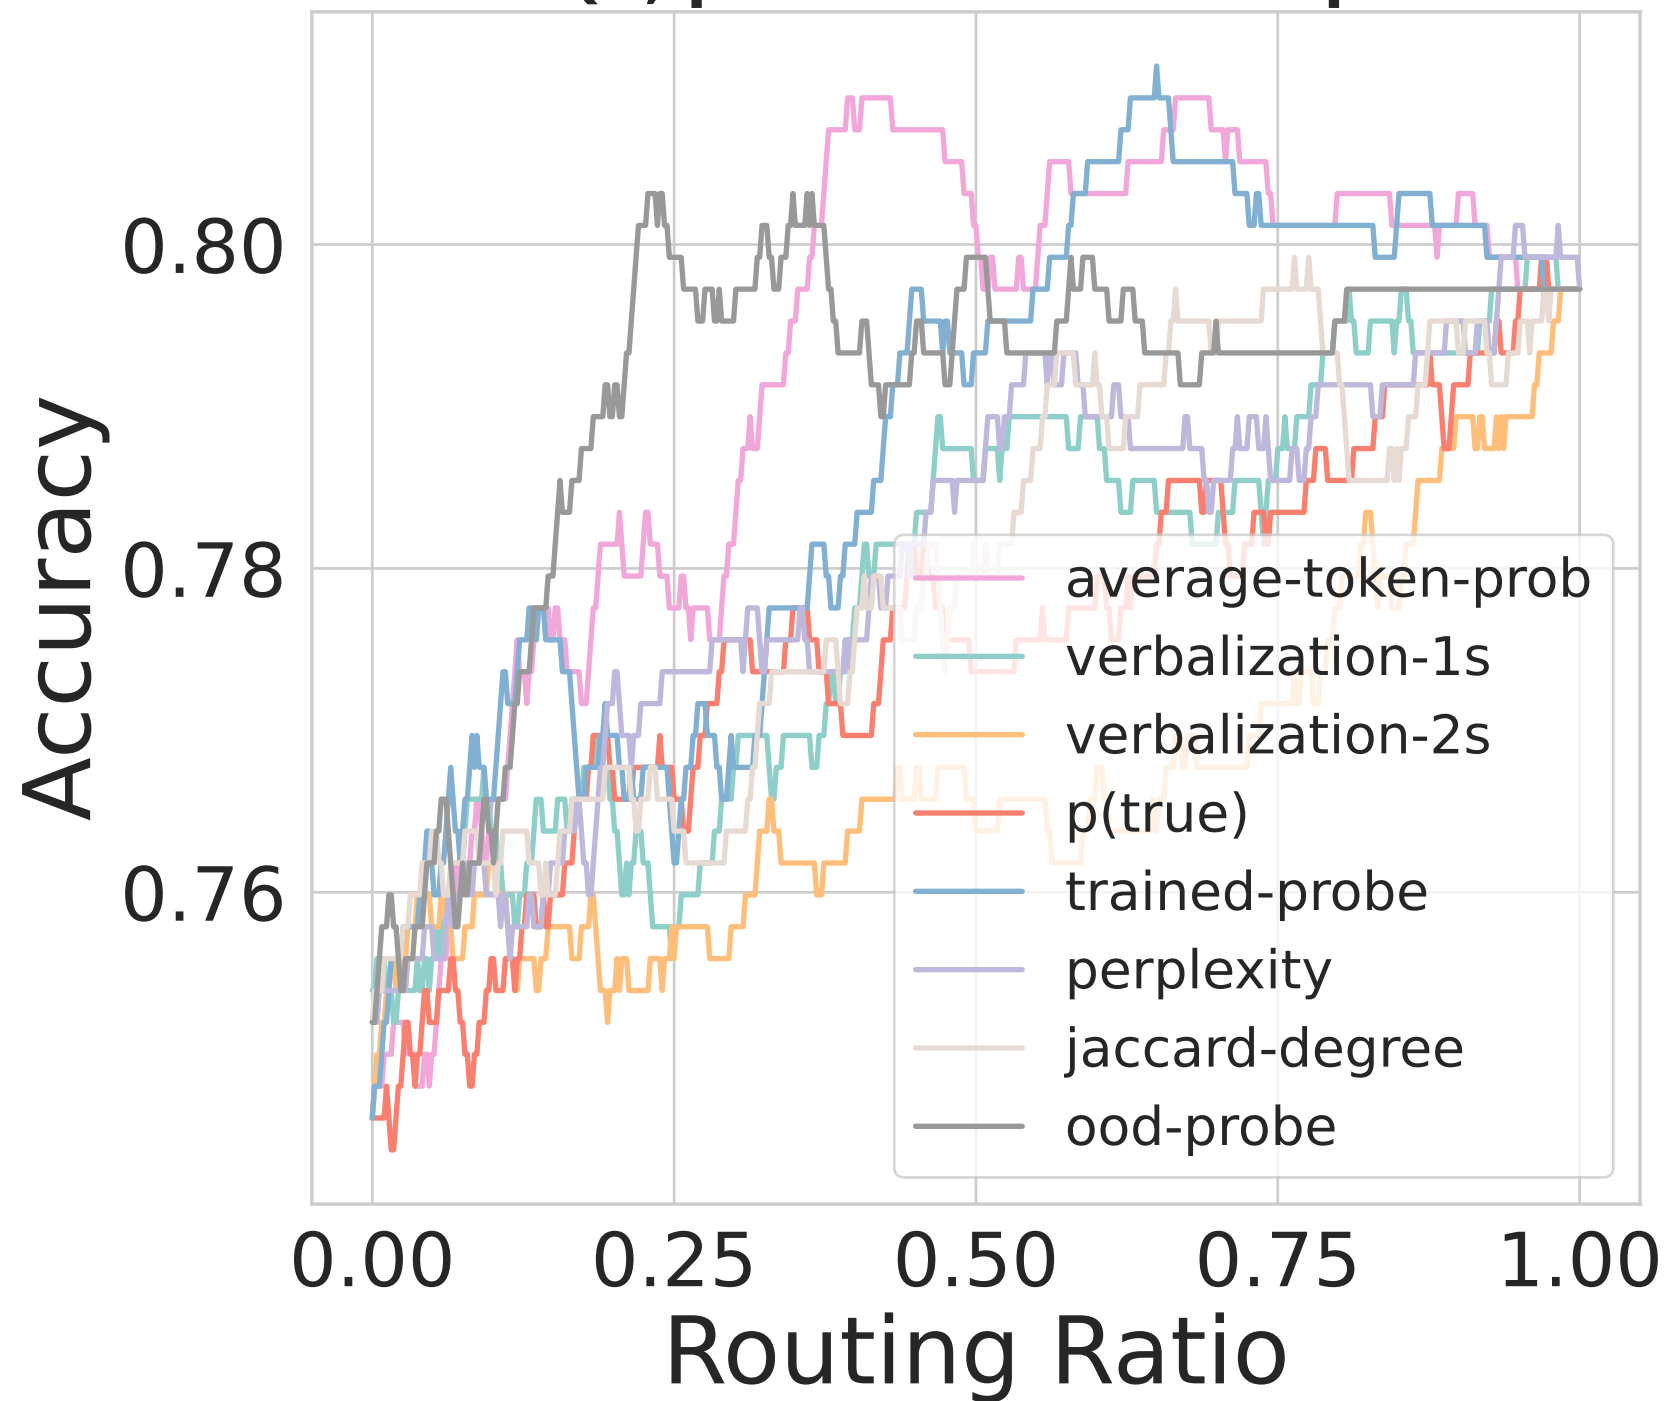

Supplement: supplementary_material [file rr_acc_social_i_qa_phi-3.5-mini_dsR1.pdf › Routing_SLM_LLMs/Uncertainty-based Routing/w_legend/to_dsR1/rr_acc_social_i_qa_phi-3.5-mini_dsR1.pdf]

# Social IQa, phi-4-mini-reasoning to DeepSeek-R1

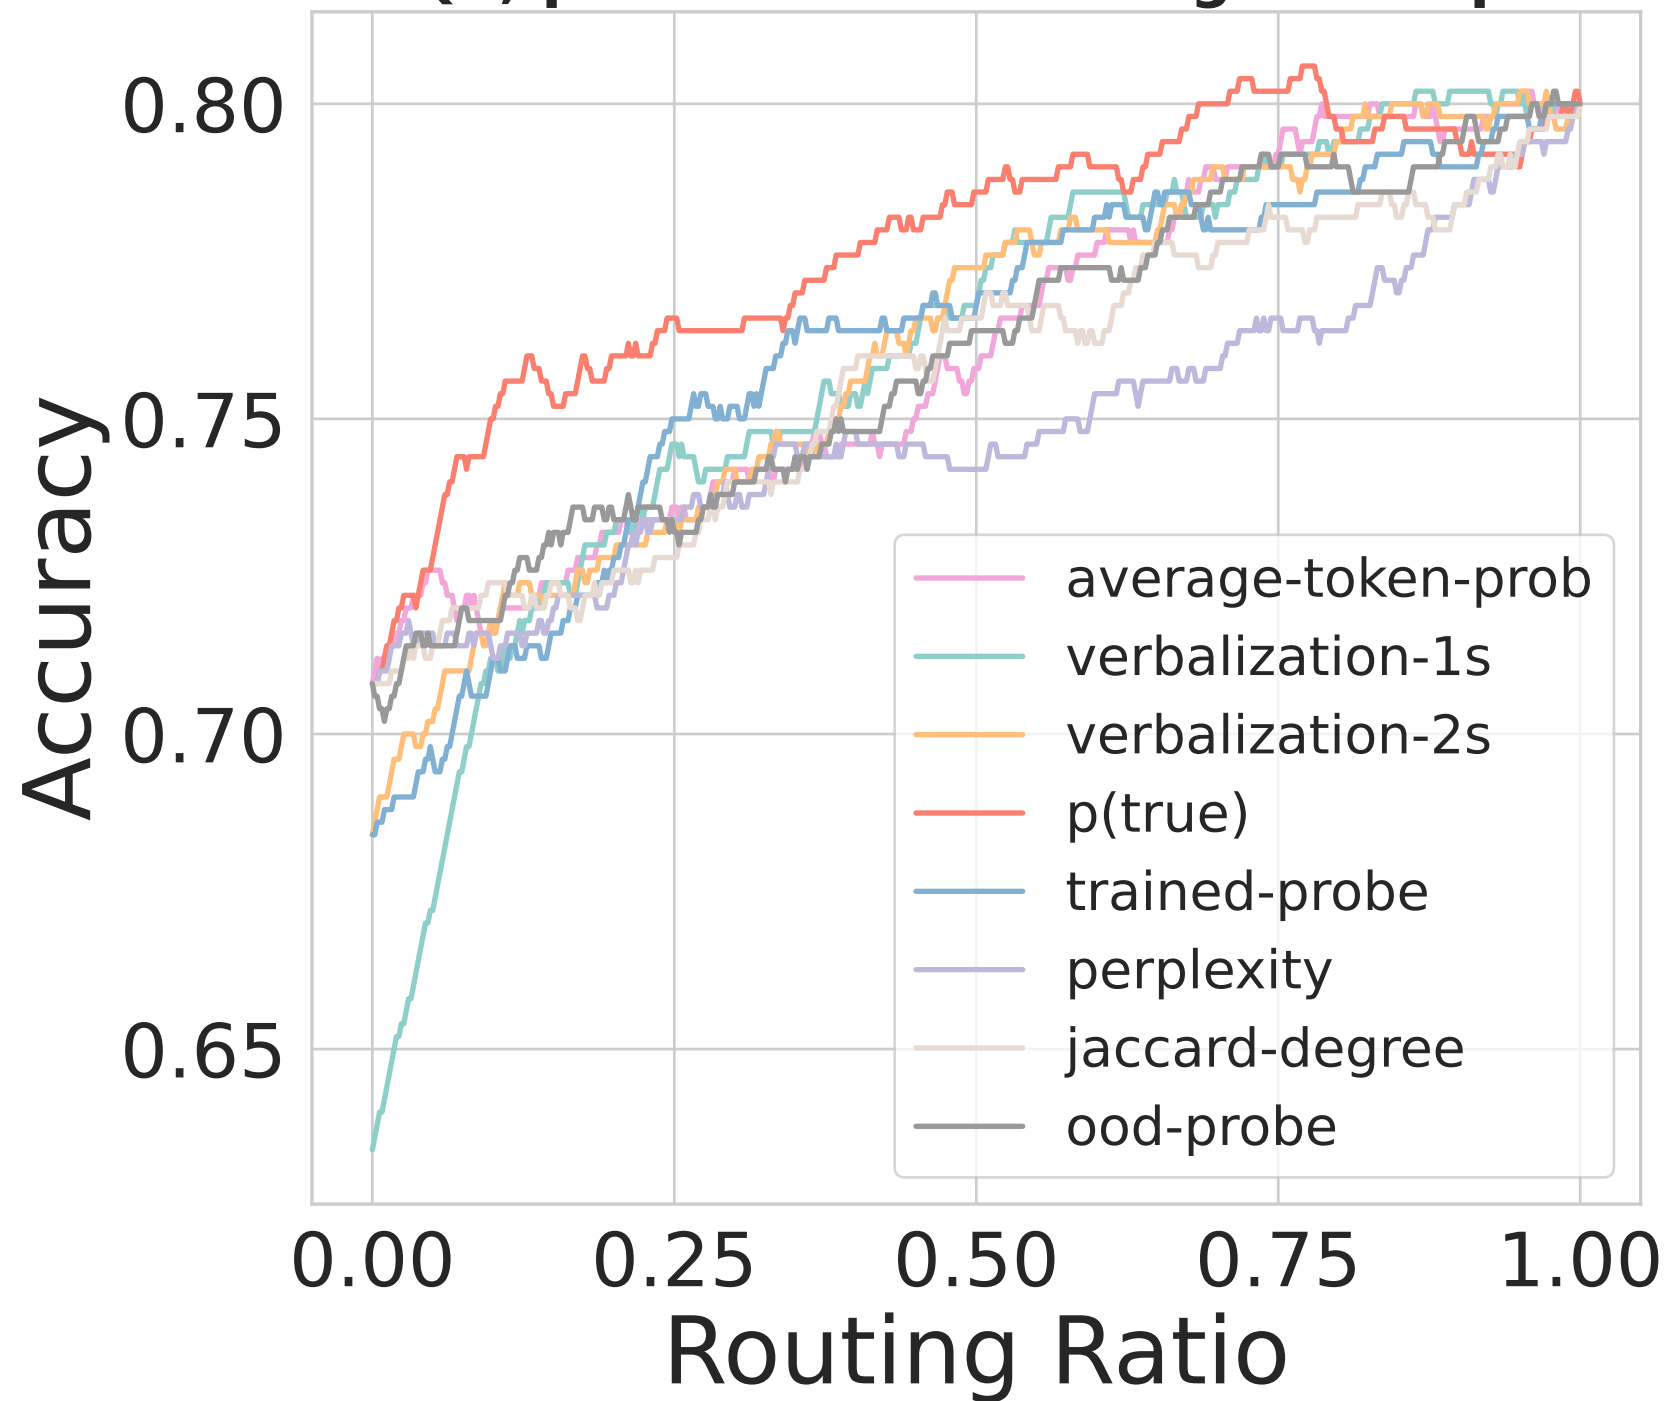

Supplement: supplementary_material [file rr_acc_social_i_qa_phi-4-mini-reasoning_dsR1.pdf › Routing_SLM_LLMs/Uncertainty-based Routing/w_legend/to_dsR1/rr_acc_social_i_qa_phi-4-mini-reasoning_dsR1.pdf]

**Social IQa, qwen-2.5-7b to DeepSeek-R1**

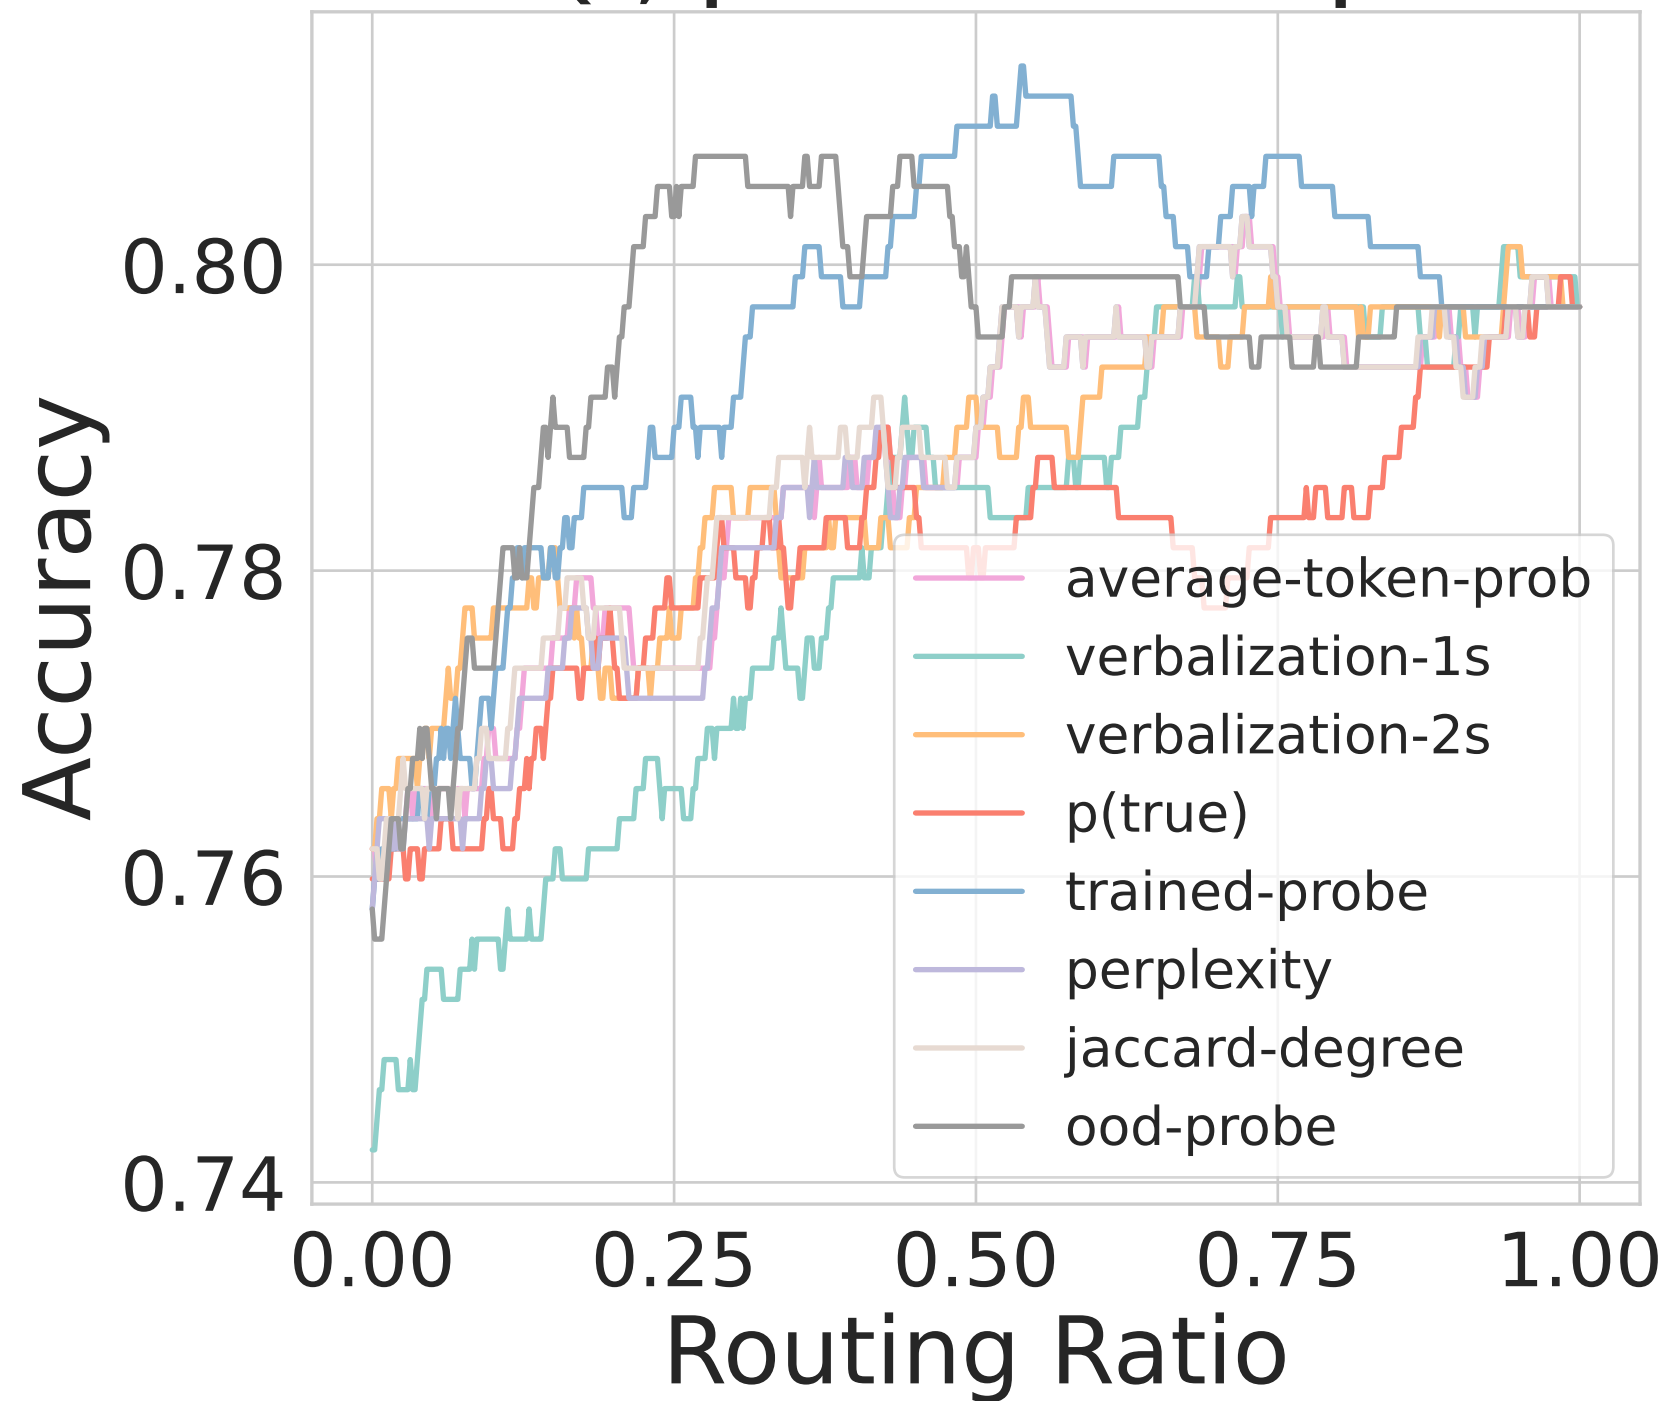

Supplement: supplementary_material [file rr_acc_social_i_qa_qwen-2.5-7b_dsR1.pdf › Routing_SLM_LLMs/Uncertainty-based Routing/w_legend/to_dsR1/rr_acc_social_i_qa_qwen-2.5-7b_dsR1.pdf]

# Social IQa, rwkv to DeepSeek-R1

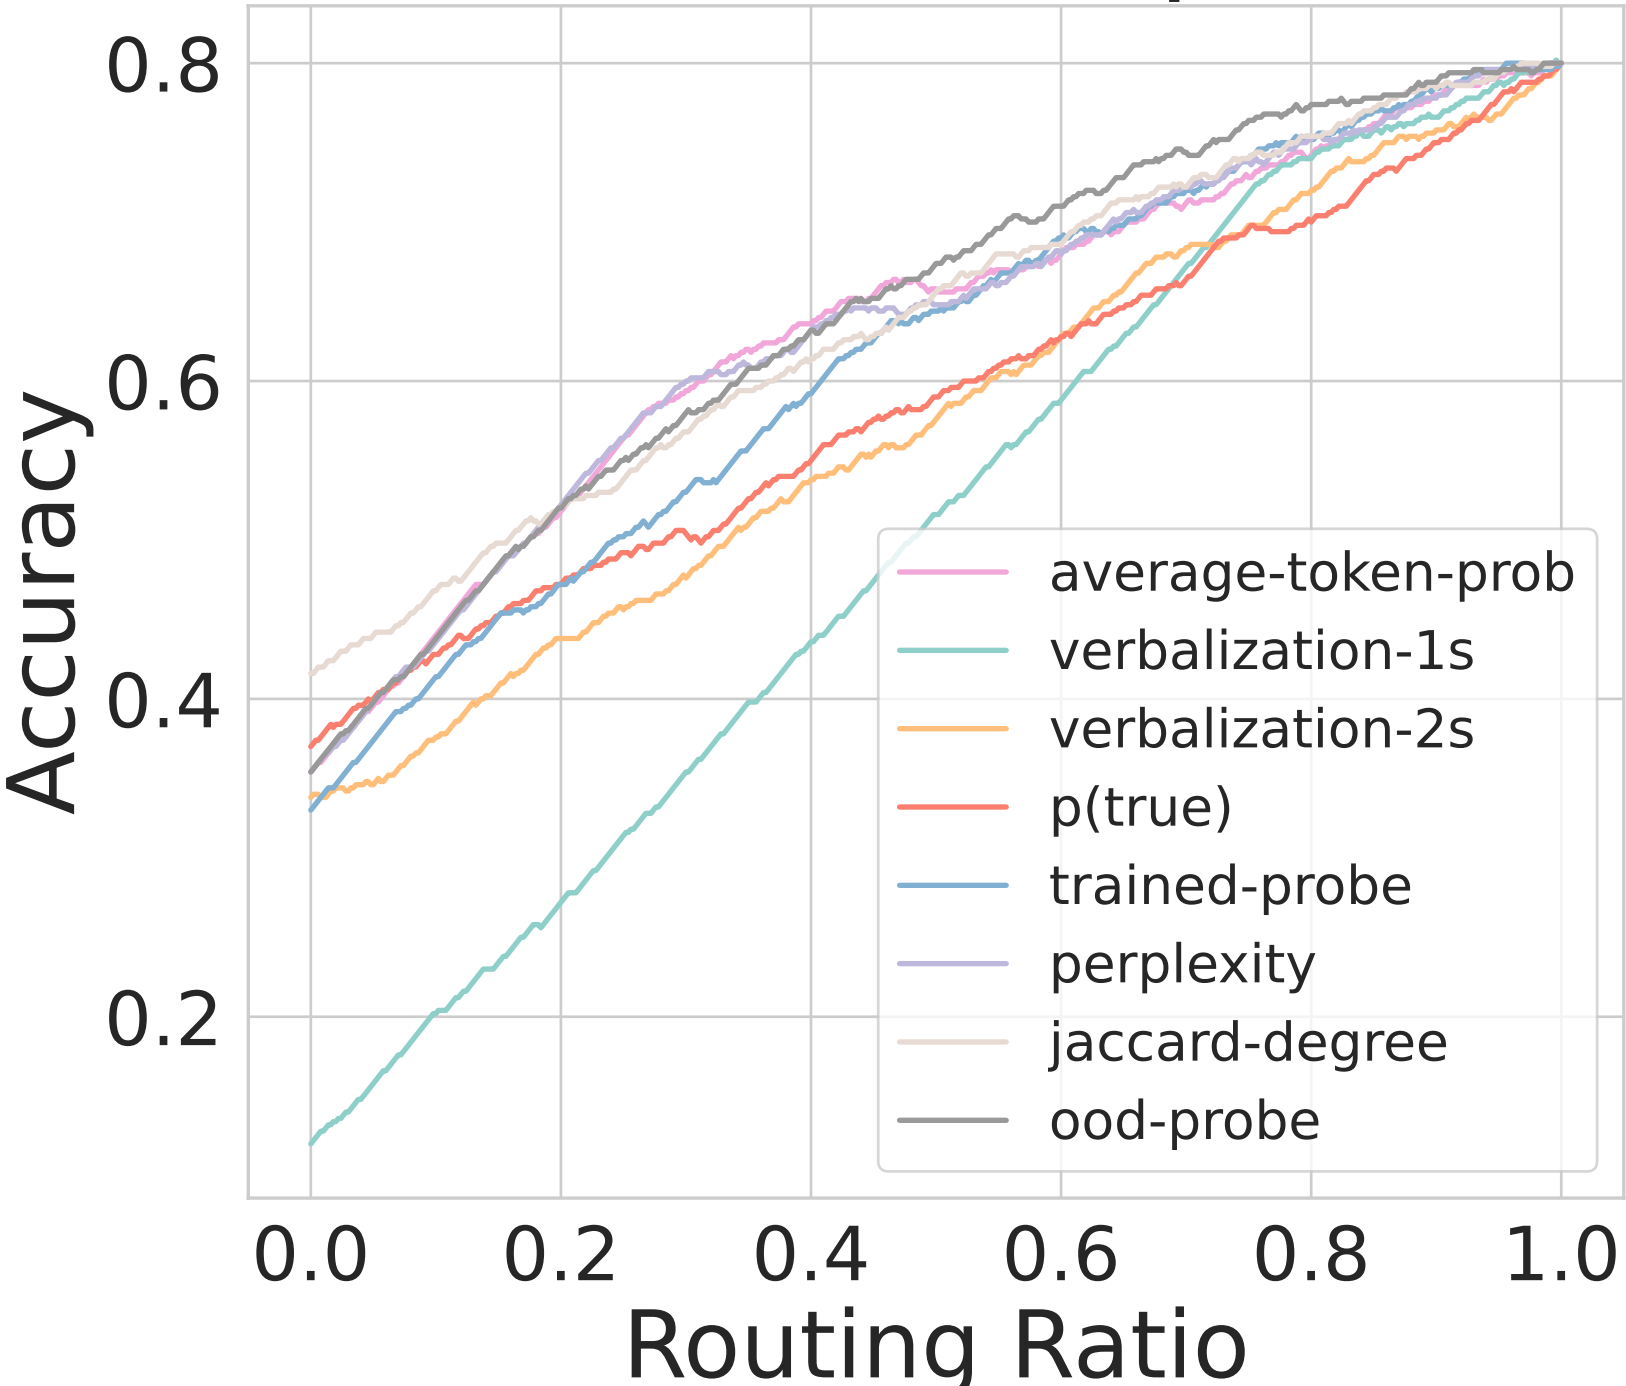

Supplement: supplementary_material [file rr_acc_social_i_qa_rwkv_dsR1.pdf › Routing_SLM_LLMs/Uncertainty-based Routing/w_legend/to_dsR1/rr_acc_social_i_qa_rwkv_dsR1.pdf]

# SVAMP, Qwen3-0.6B to DeepSeek-R1

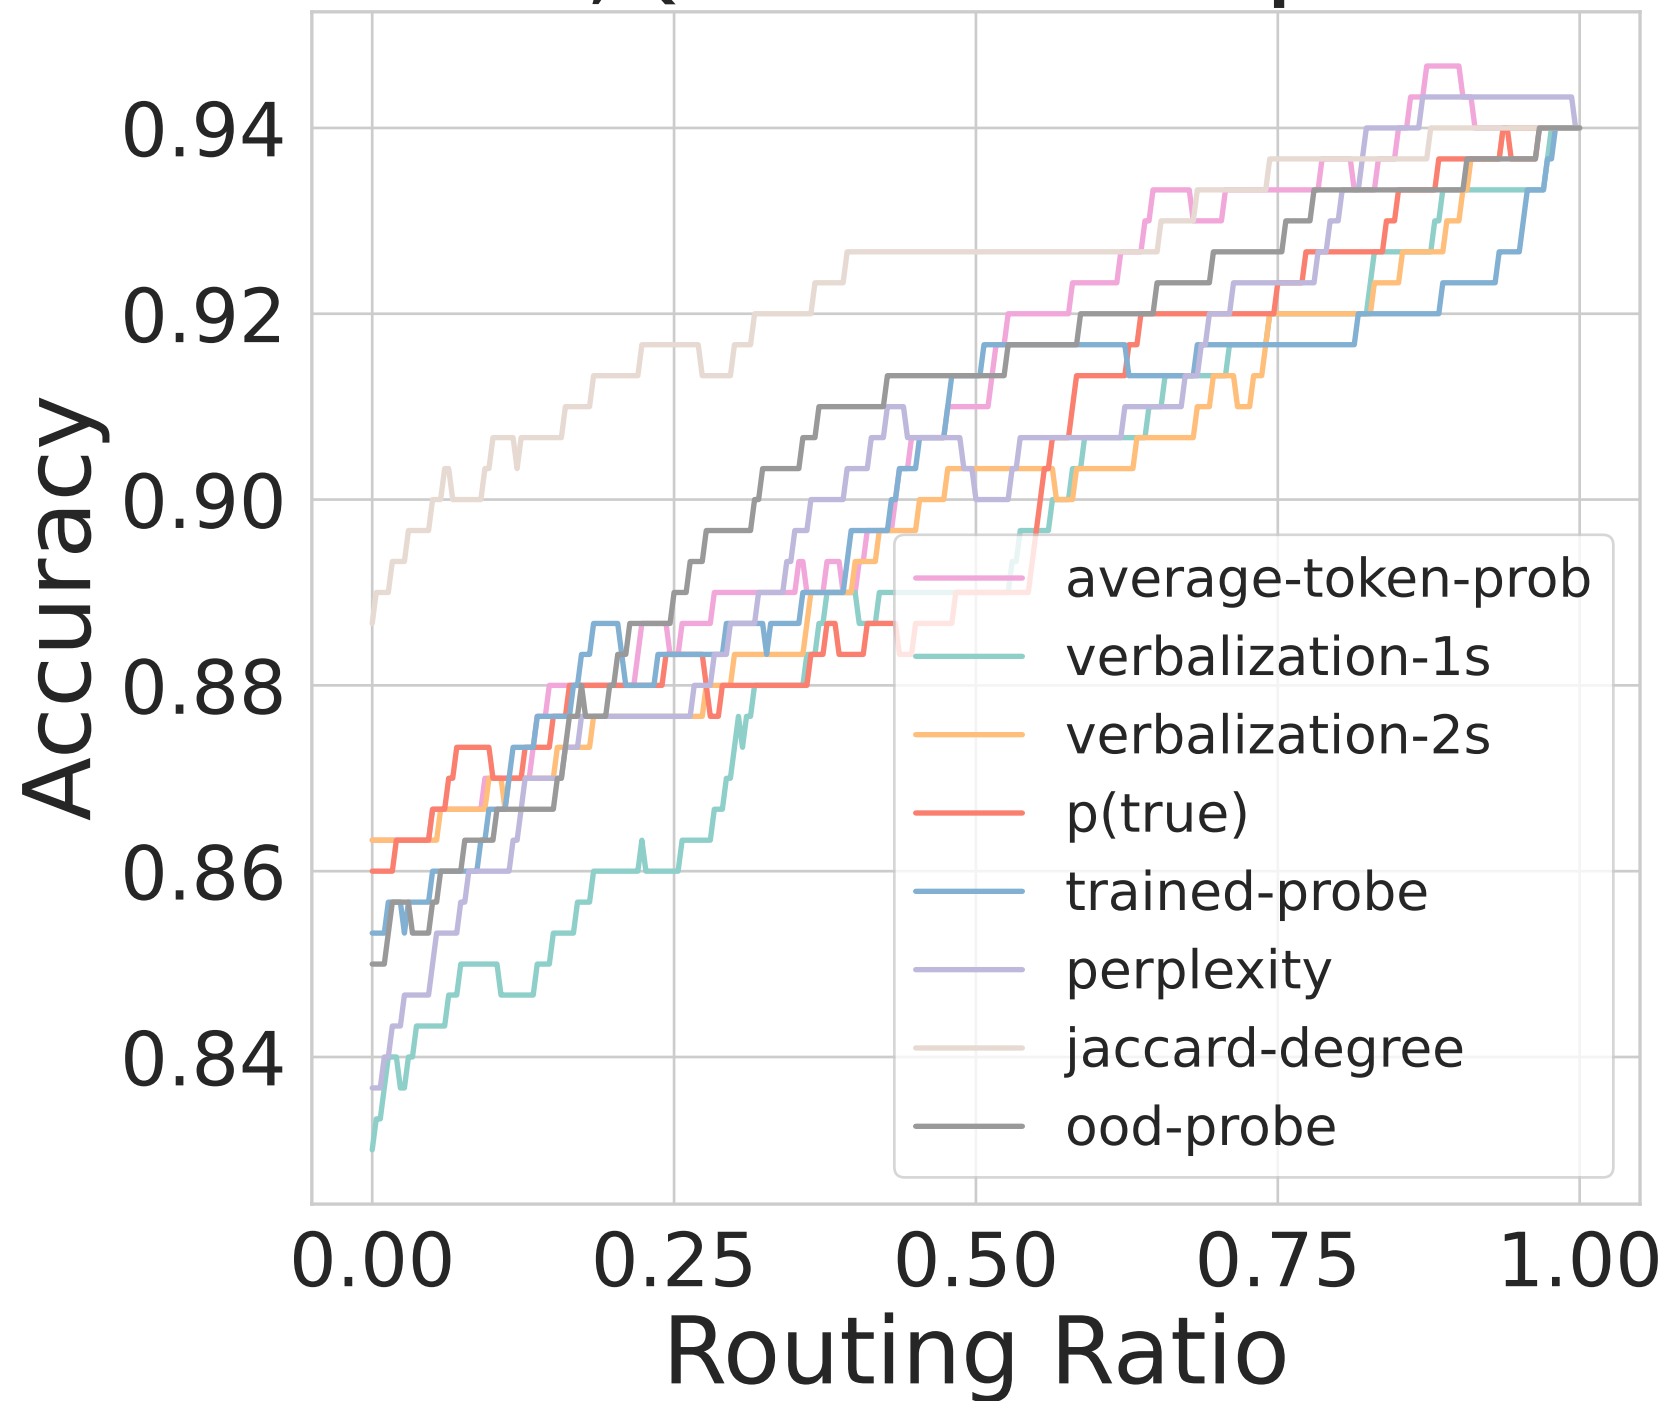

Supplement: supplementary_material [file rr_acc_svamp_Qwen3-0.6B_dsR1.pdf › Routing_SLM_LLMs/Uncertainty-based Routing/w_legend/to_dsR1/rr_acc_svamp_Qwen3-0.6B_dsR1.pdf]

# SVAMP, Qwen3-1.7B to DeepSeek-R1

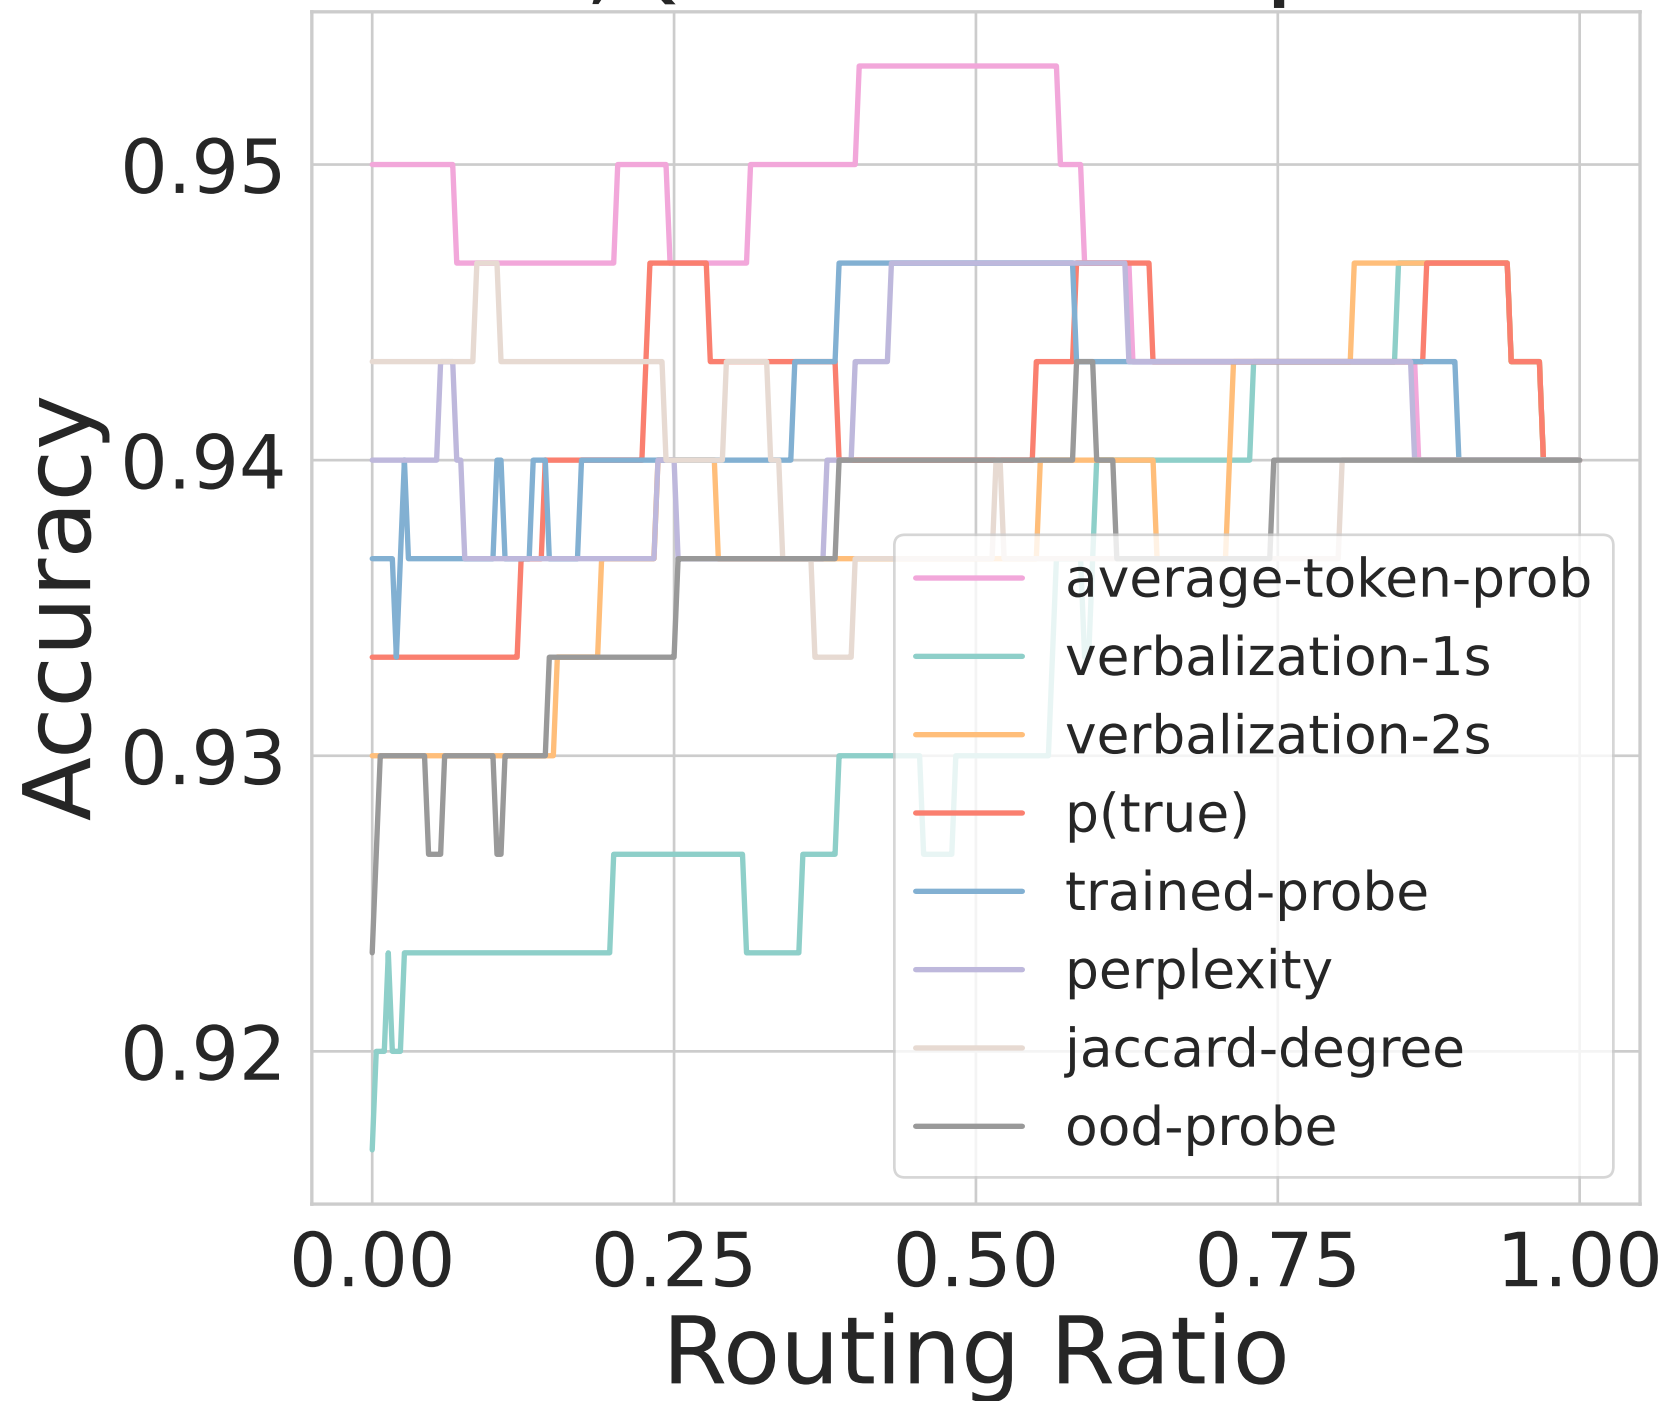

Supplement: supplementary_material [file rr_acc_svamp_Qwen3-1.7B_dsR1.pdf › Routing_SLM_LLMs/Uncertainty-based Routing/w_legend/to_dsR1/rr_acc_svamp_Qwen3-1.7B_dsR1.pdf]

# SVAMP, Qwen3-4B to DeepSeek-R1

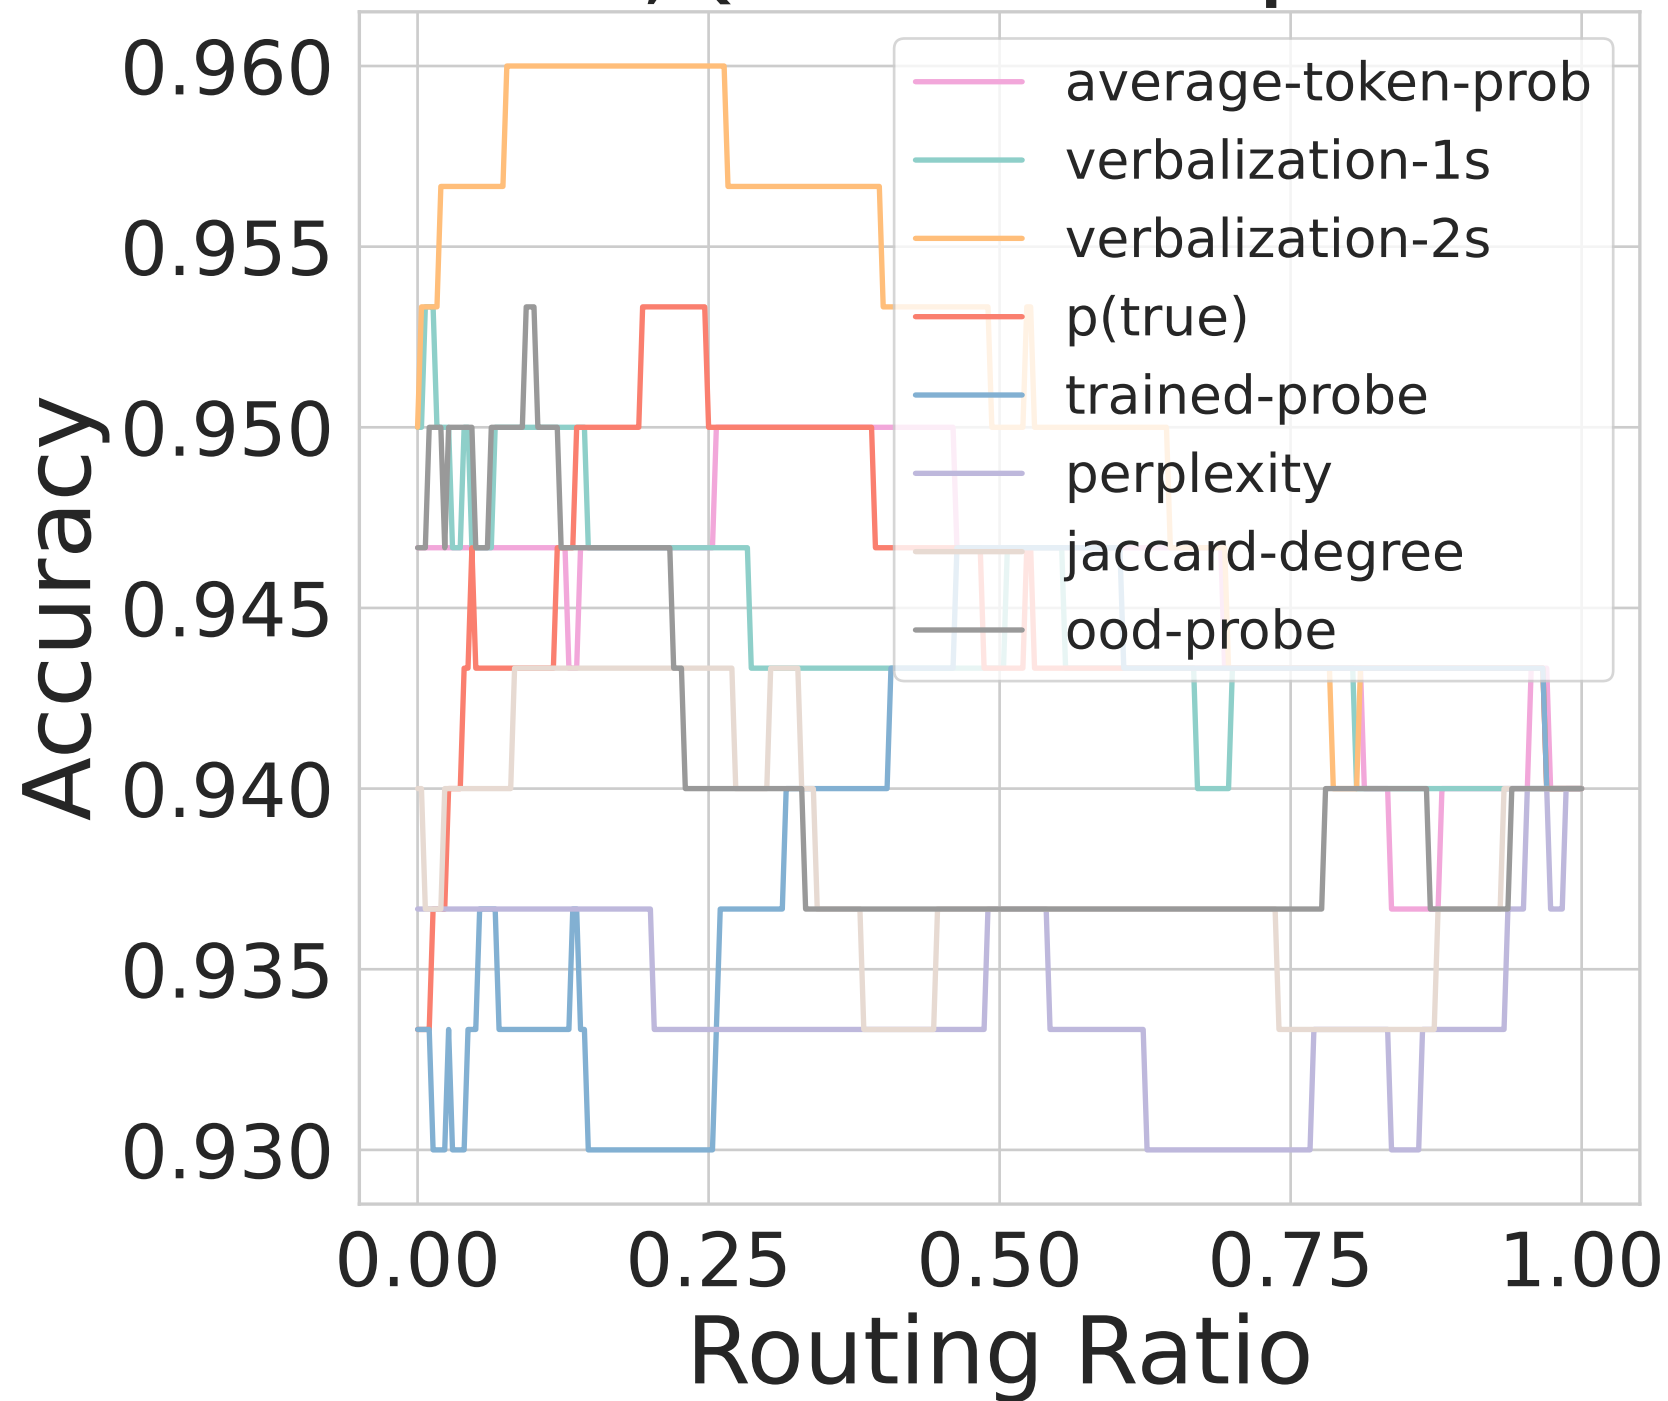

Supplement: supplementary_material [file rr_acc_svamp_Qwen3-4B_dsR1.pdf › Routing_SLM_LLMs/Uncertainty-based Routing/w_legend/to_dsR1/rr_acc_svamp_Qwen3-4B_dsR1.pdf]

# SVAMP, granite-3.1-8b to DeepSeek-R1

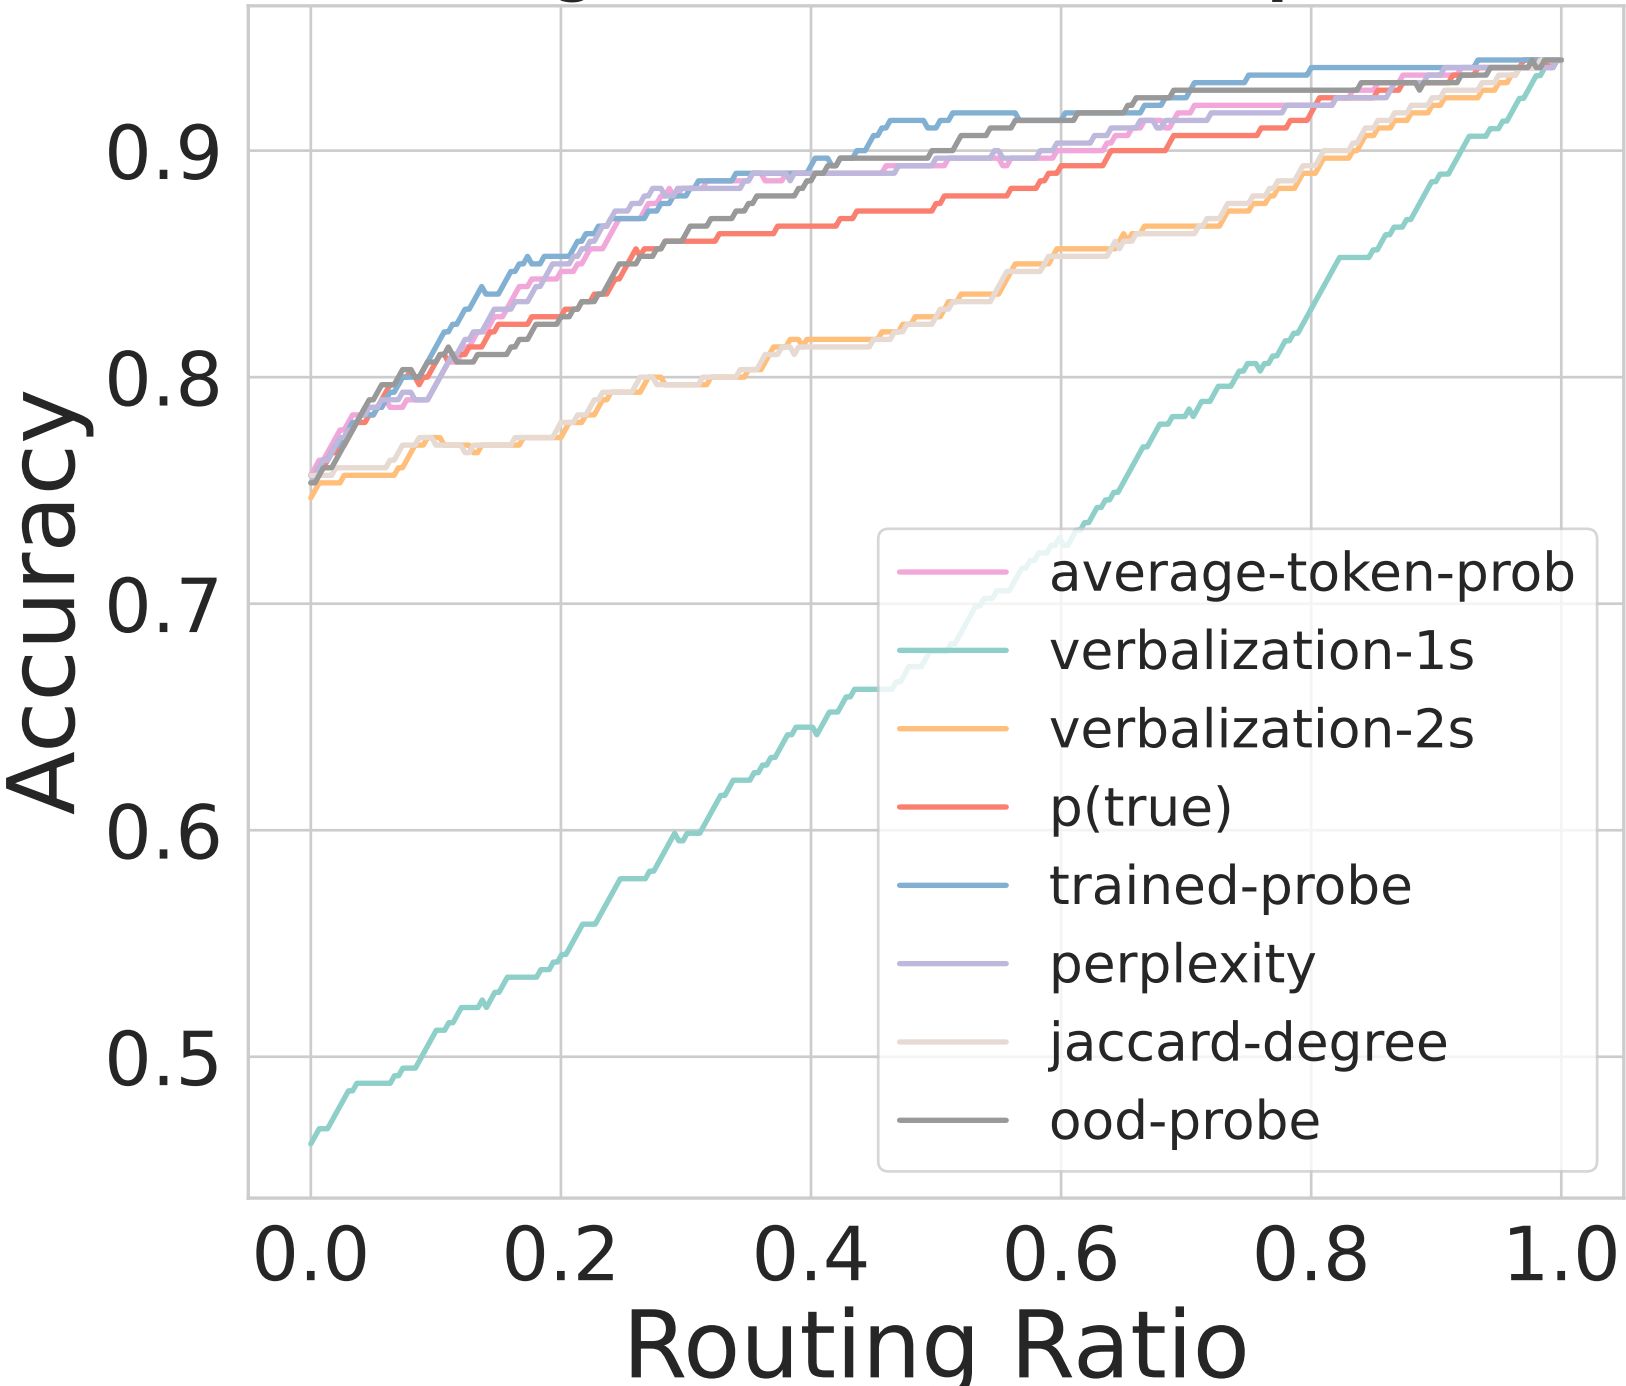

Supplement: supplementary_material [file rr_acc_svamp_granite-3.1-8b_dsR1.pdf › Routing_SLM_LLMs/Uncertainty-based Routing/w_legend/to_dsR1/rr_acc_svamp_granite-3.1-8b_dsR1.pdf]

# SVAMP, llama-3.1-8b to DeepSeek-R1

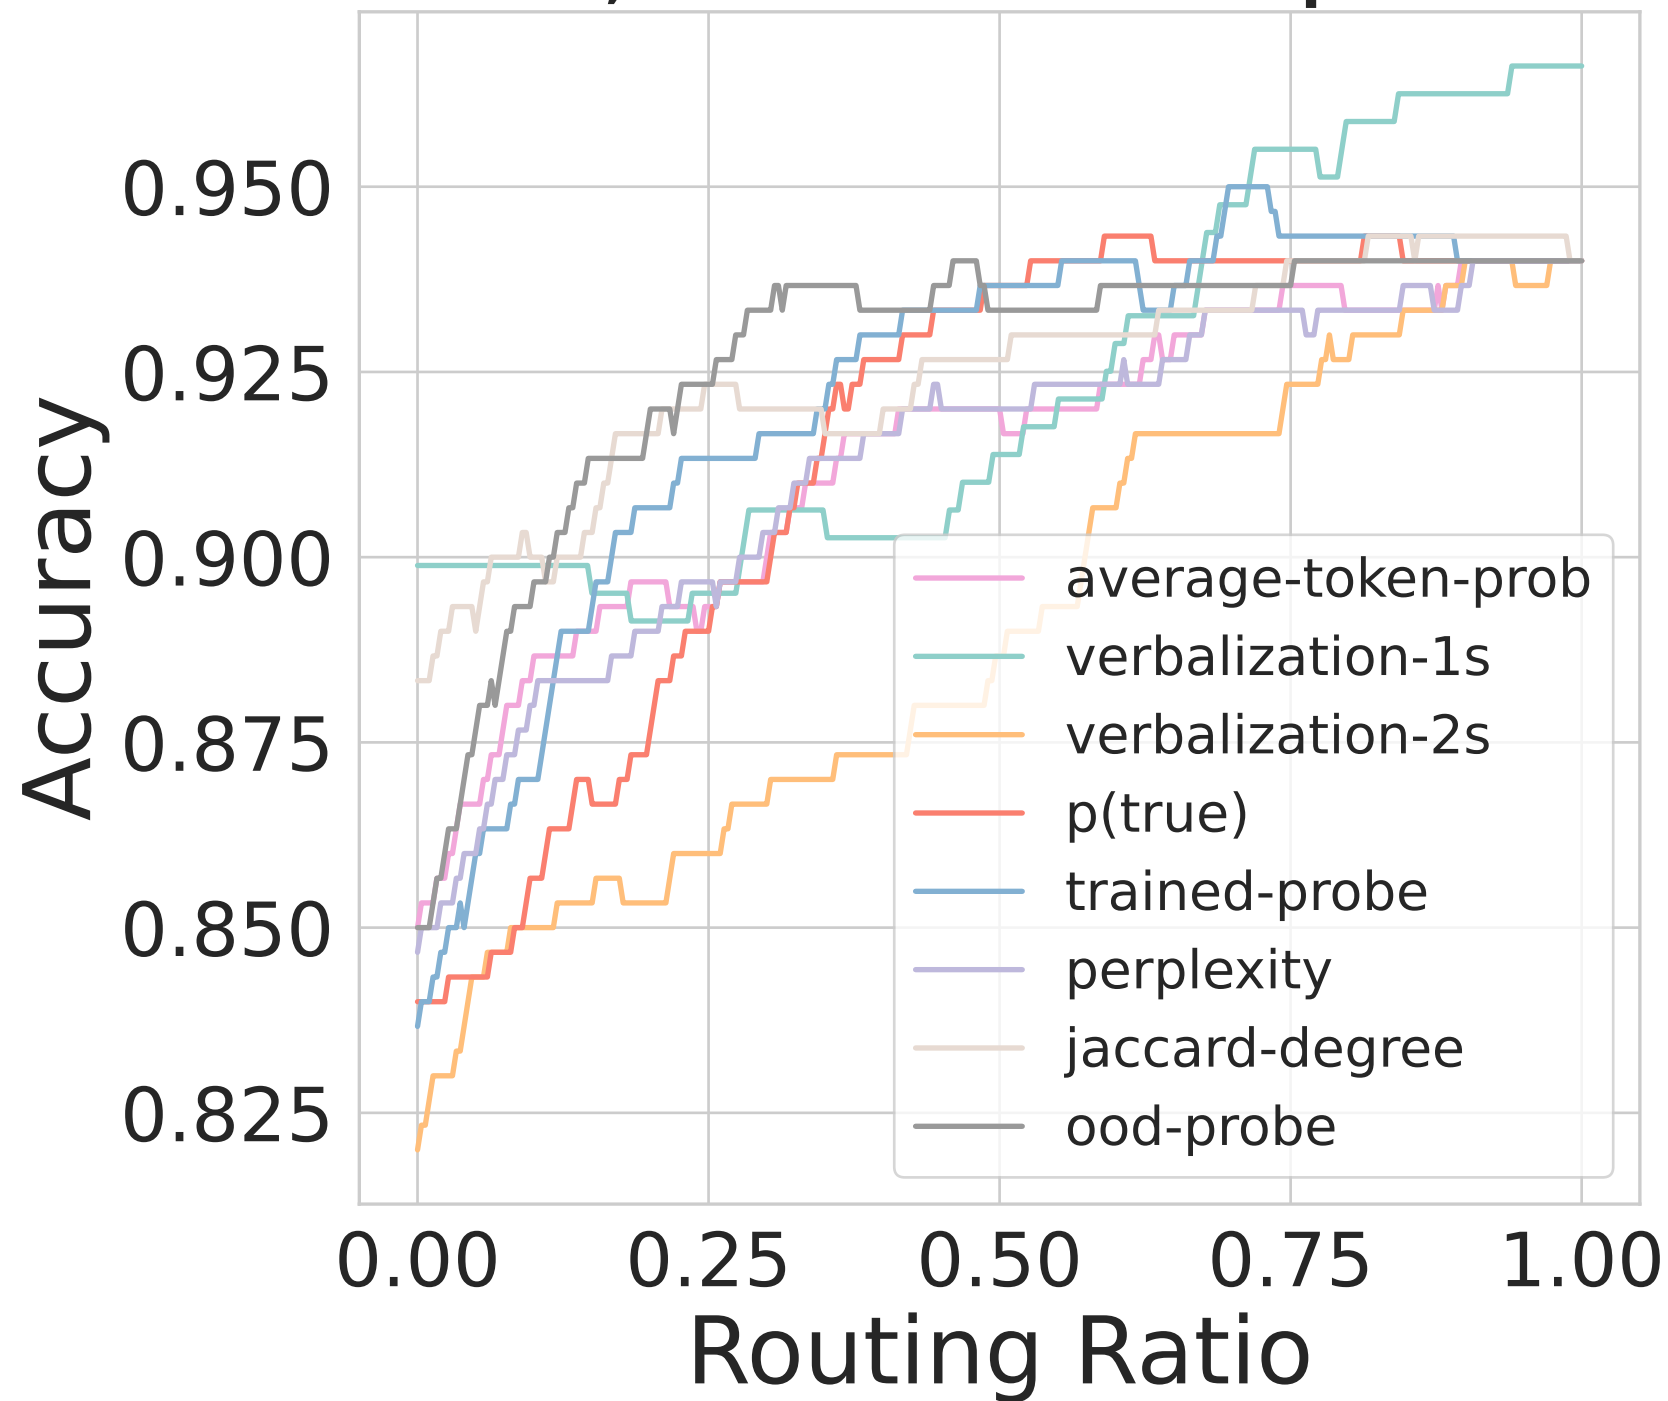

Supplement: supplementary_material [file rr_acc_svamp_llama-3.1-8b_dsR1.pdf › Routing_SLM_LLMs/Uncertainty-based Routing/w_legend/to_dsR1/rr_acc_svamp_llama-3.1-8b_dsR1.pdf]

# SVAMP, llama-3.2-1b to DeepSeek-R1

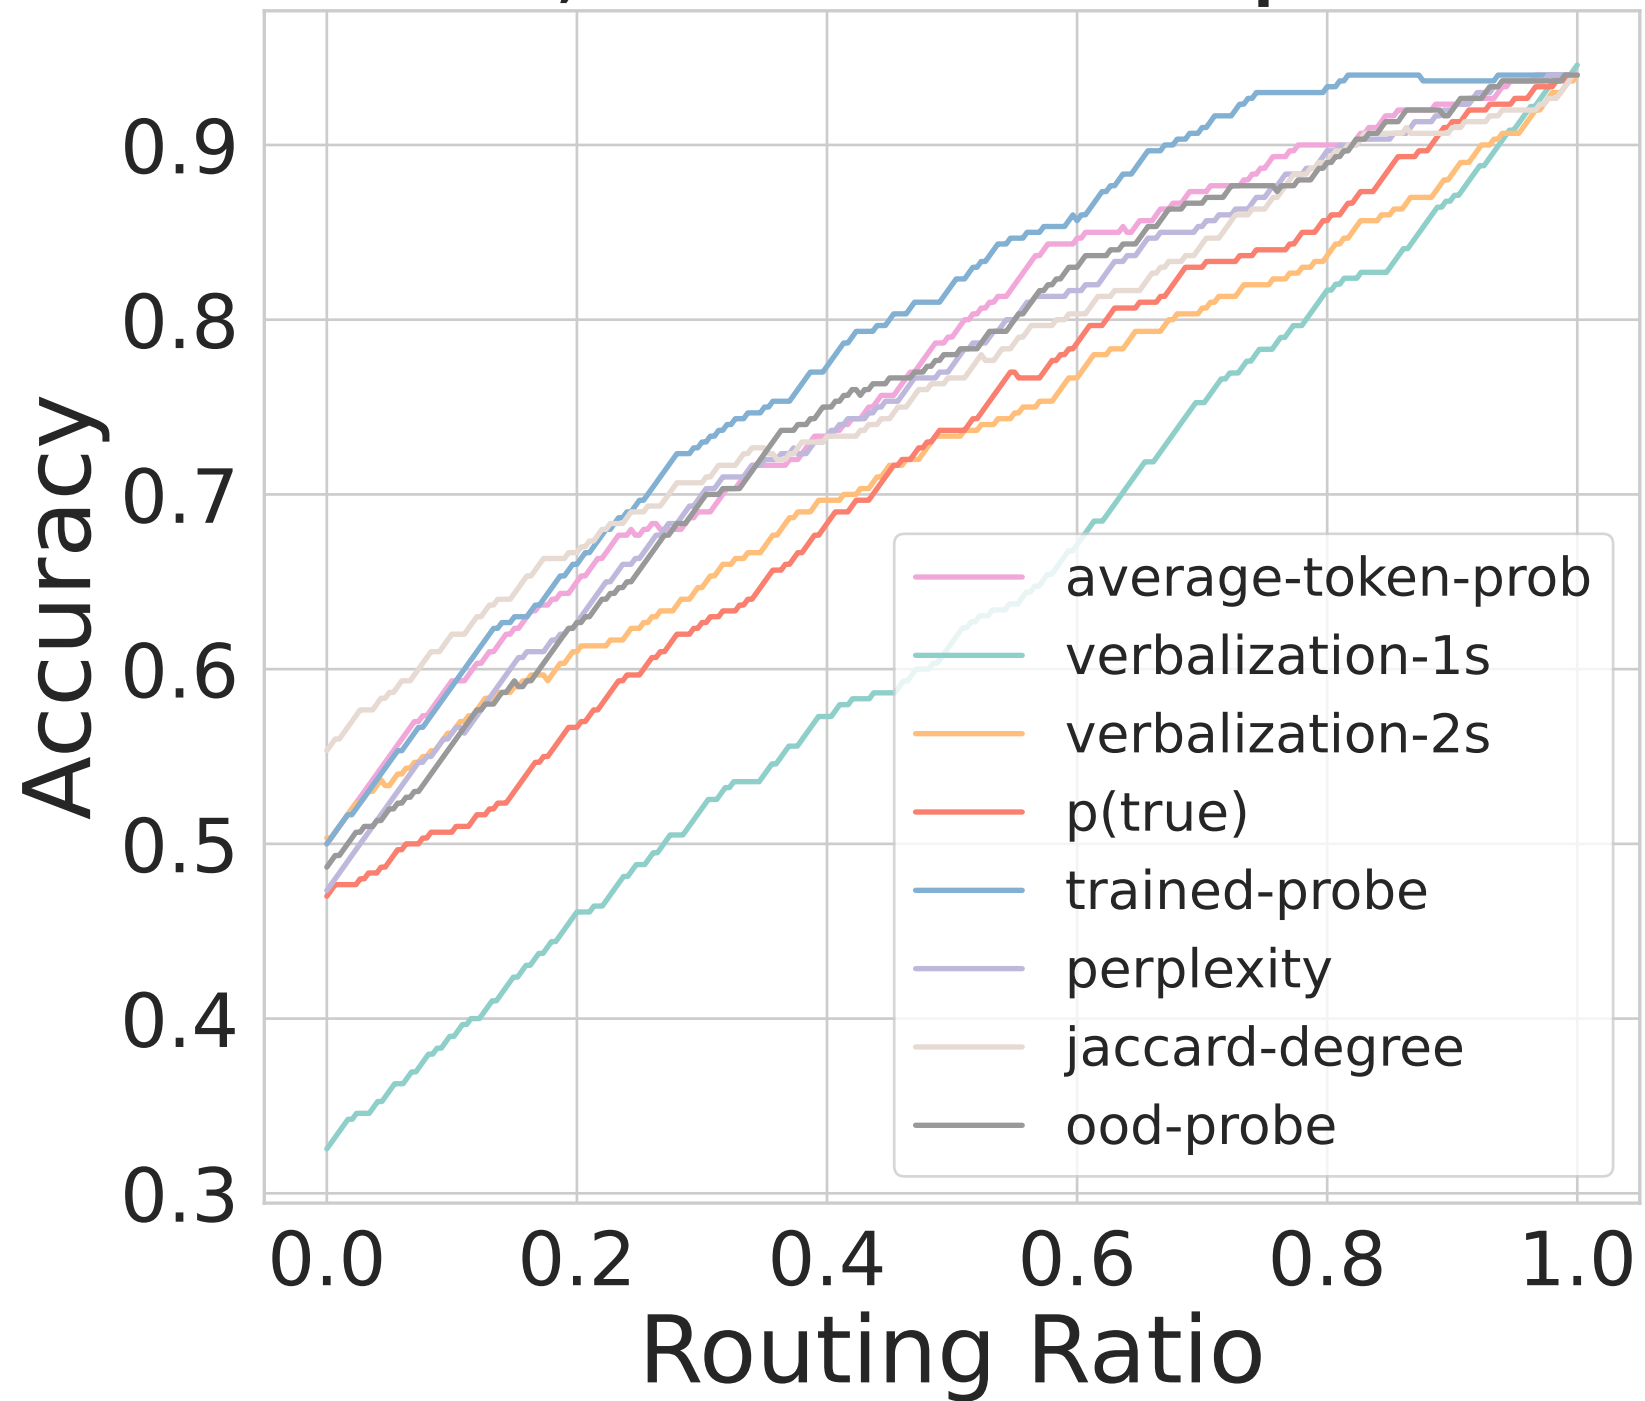

Supplement: supplementary_material [file rr_acc_svamp_llama-3.2-1b_dsR1.pdf › Routing_SLM_LLMs/Uncertainty-based Routing/w_legend/to_dsR1/rr_acc_svamp_llama-3.2-1b_dsR1.pdf]

# SVAMP, llama-3.2-3b to DeepSeek-R1

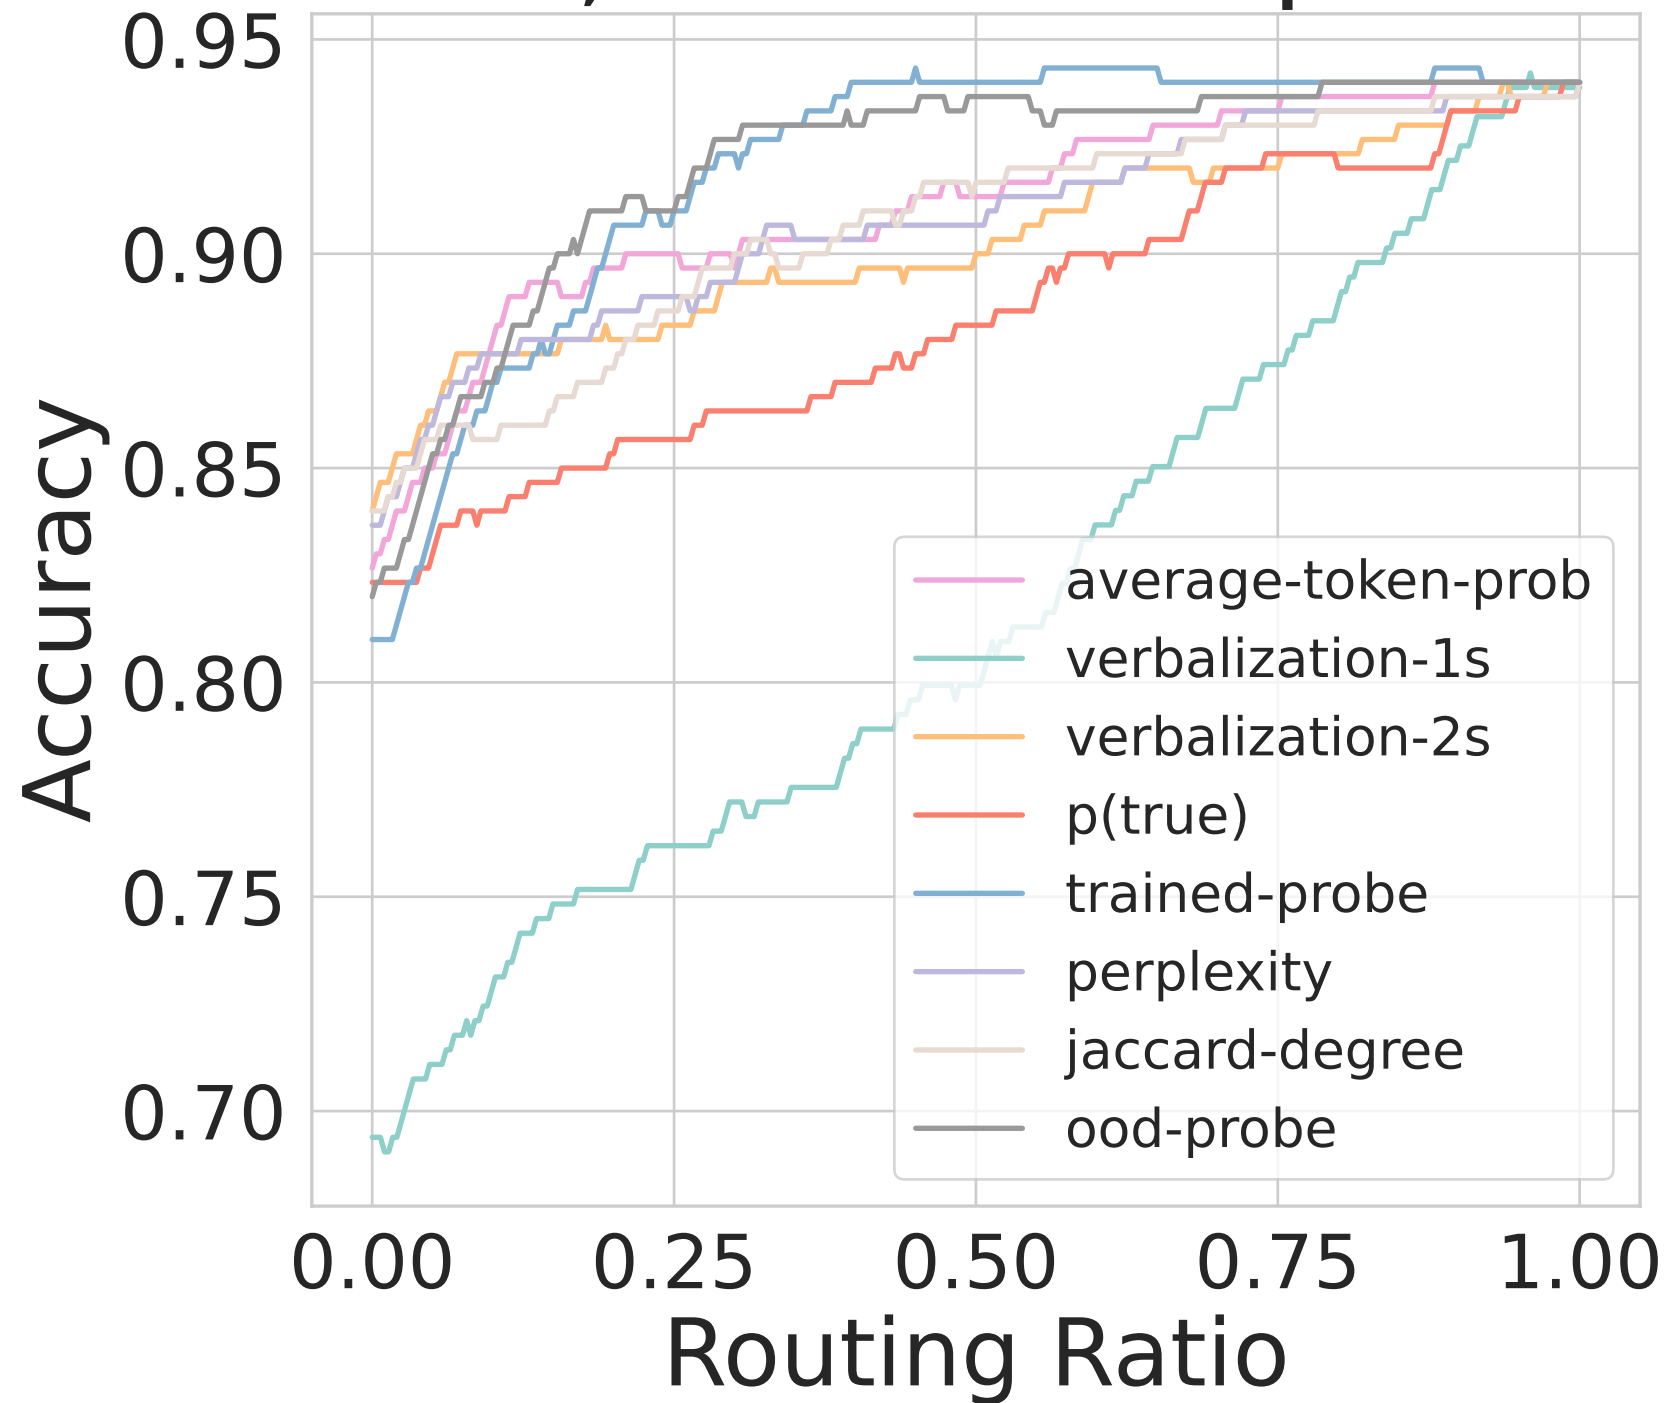

Supplement: supplementary_material [file rr_acc_svamp_llama-3.2-3b_dsR1.pdf › Routing_SLM_LLMs/Uncertainty-based Routing/w_legend/to_dsR1/rr_acc_svamp_llama-3.2-3b_dsR1.pdf]

# SVAMP, phi-3.5-mini to DeepSeek-R1

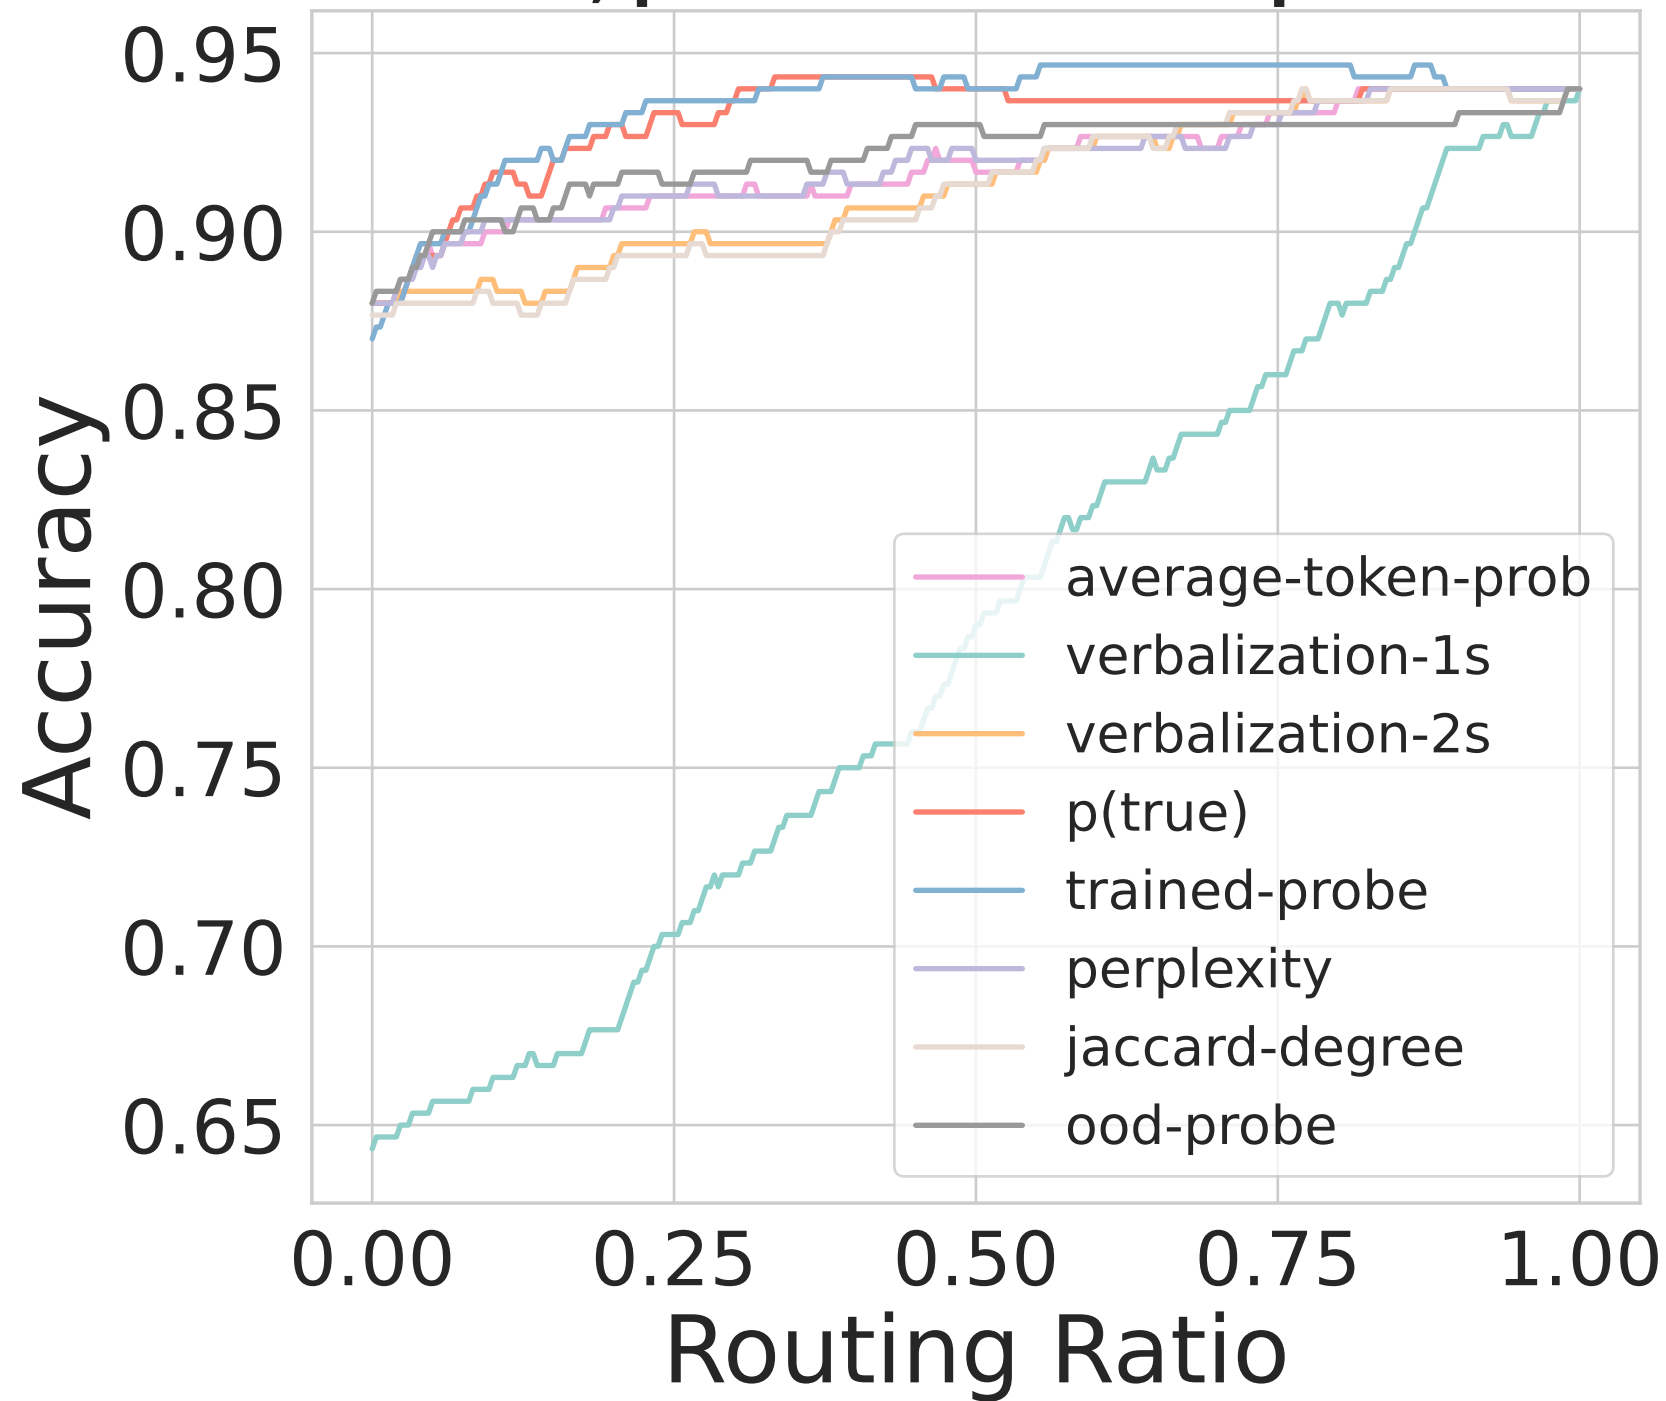

Supplement: supplementary_material [file rr_acc_svamp_phi-3.5-mini_dsR1.pdf › Routing_SLM_LLMs/Uncertainty-based Routing/w_legend/to_dsR1/rr_acc_svamp_phi-3.5-mini_dsR1.pdf]

# SVAMP, qwen-2.5-7b to DeepSeek-R1

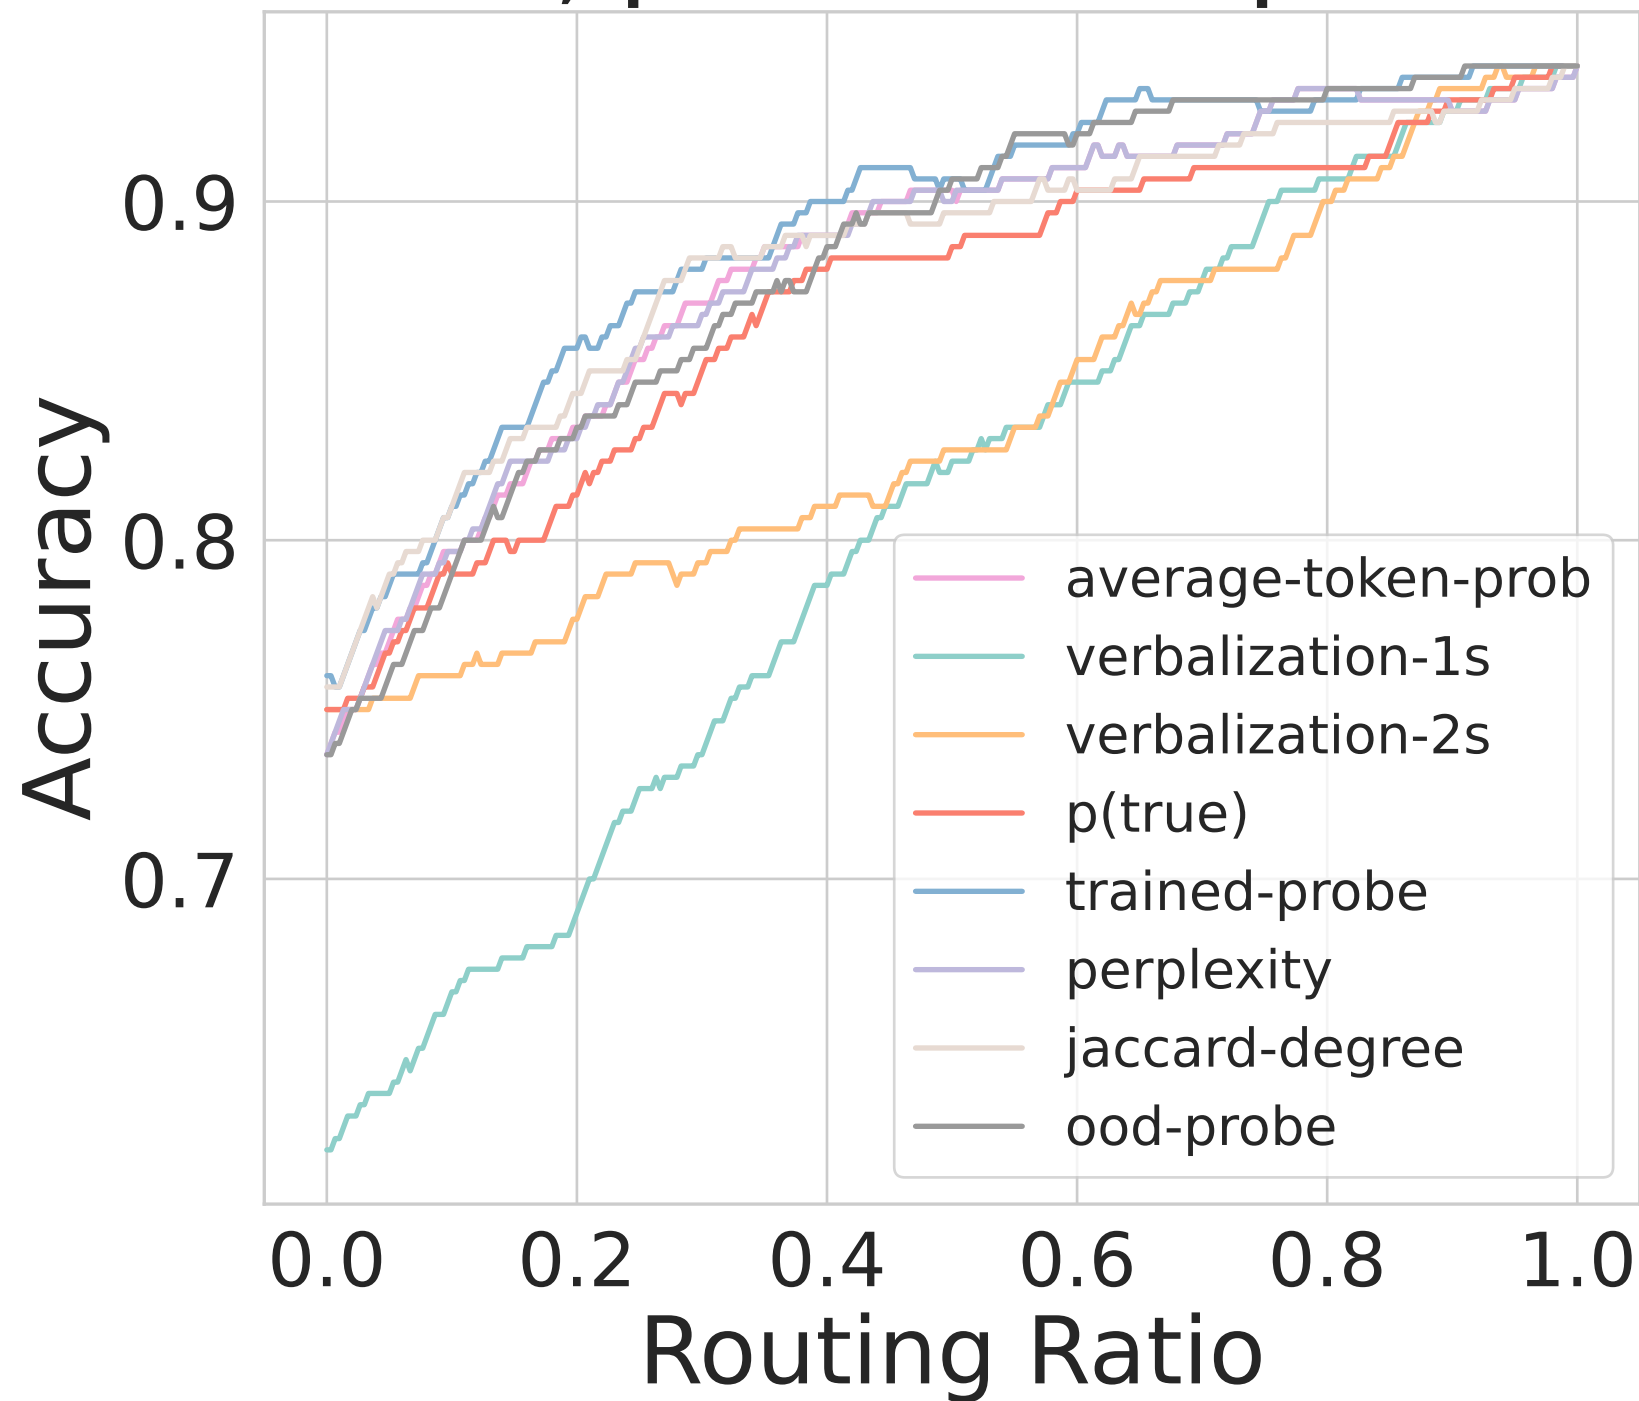

Supplement: supplementary_material [file rr_acc_svamp_qwen-2.5-7b_dsR1.pdf › Routing_SLM_LLMs/Uncertainty-based Routing/w_legend/to_dsR1/rr_acc_svamp_qwen-2.5-7b_dsR1.pdf]

# SVAMP, rwkv to DeepSeek-R1

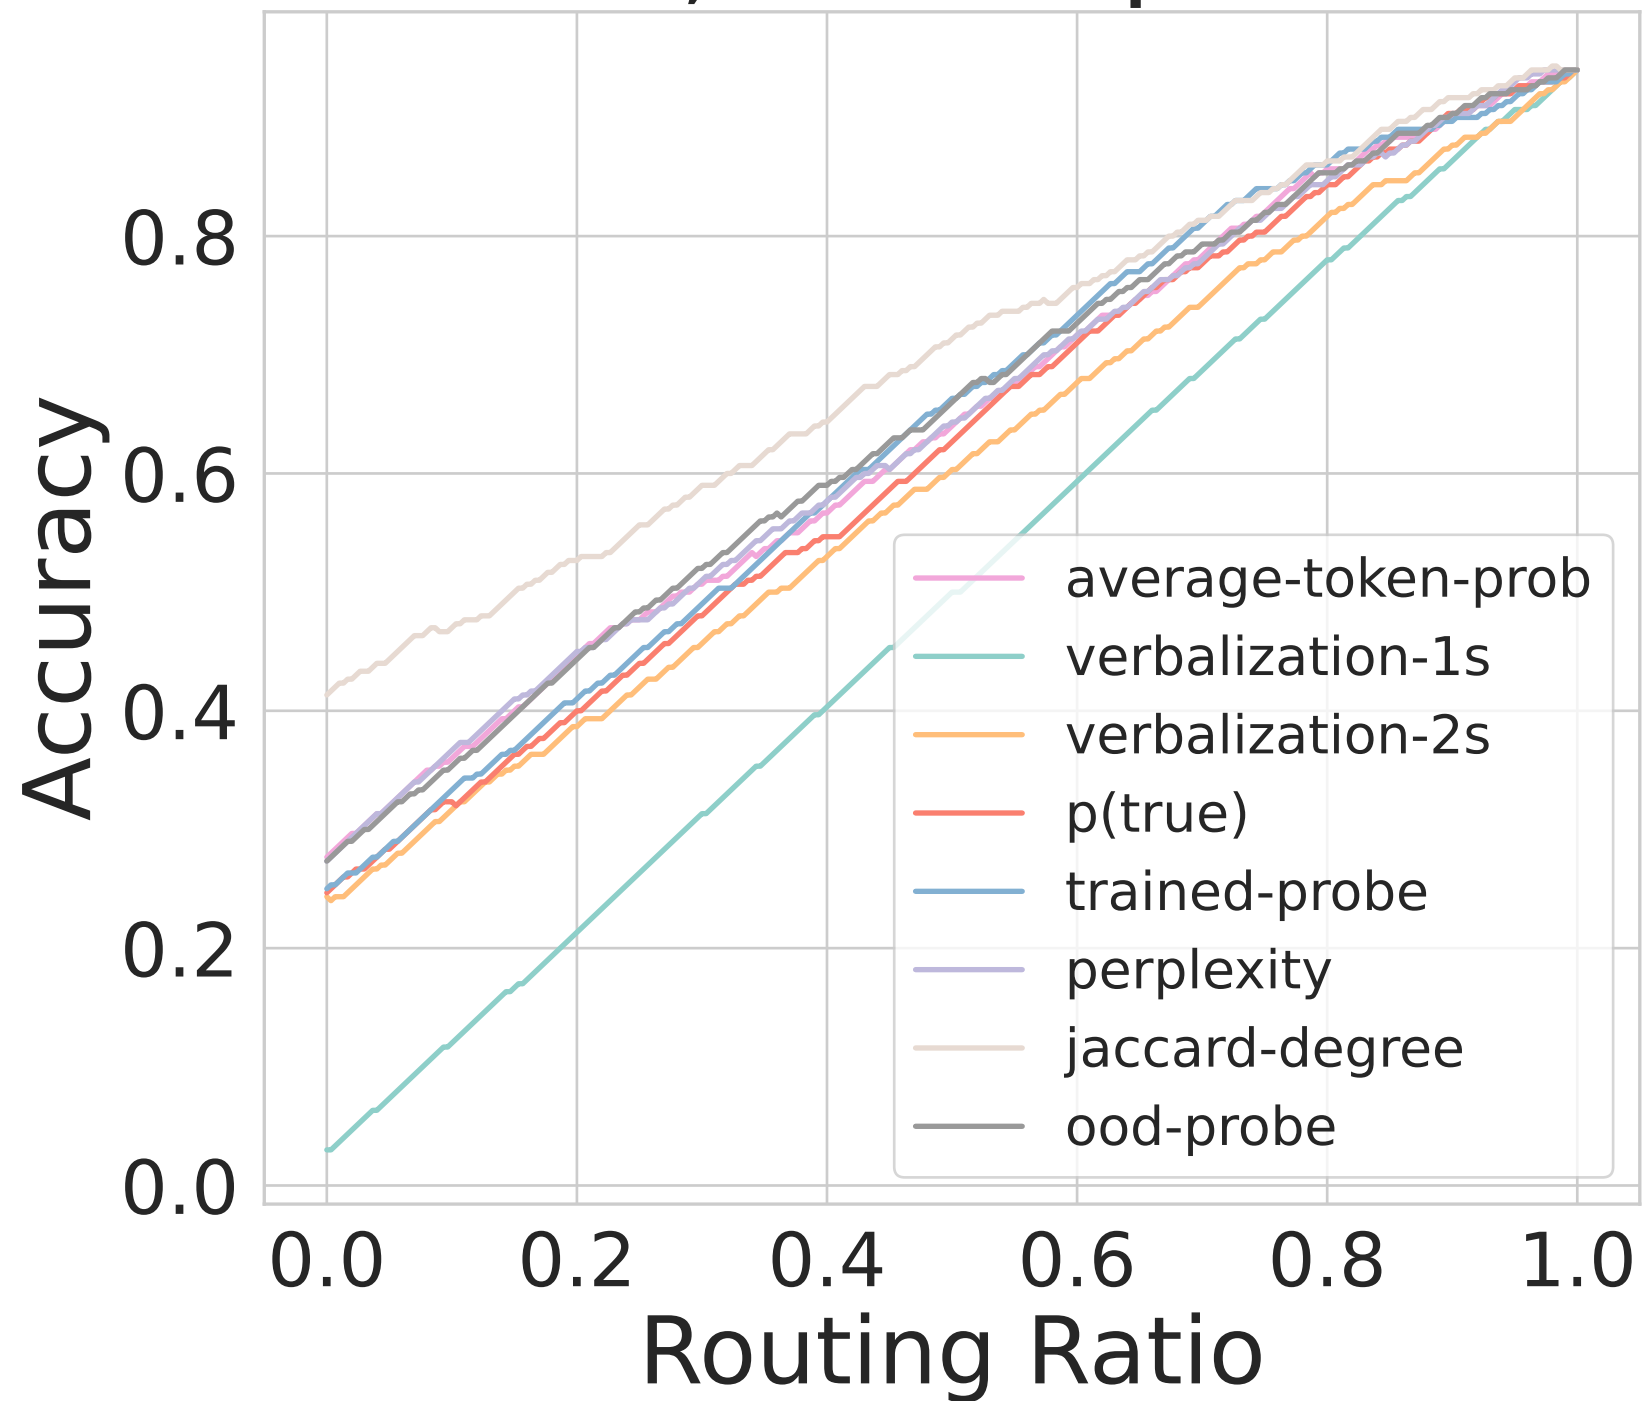

Supplement: supplementary_material [file rr_acc_svamp_rwkv_dsR1.pdf › Routing_SLM_LLMs/Uncertainty-based Routing/w_legend/to_dsR1/rr_acc_svamp_rwkv_dsR1.pdf]

**TruthfulQA, Qwen3-0.6B to DeepSeek-R1**

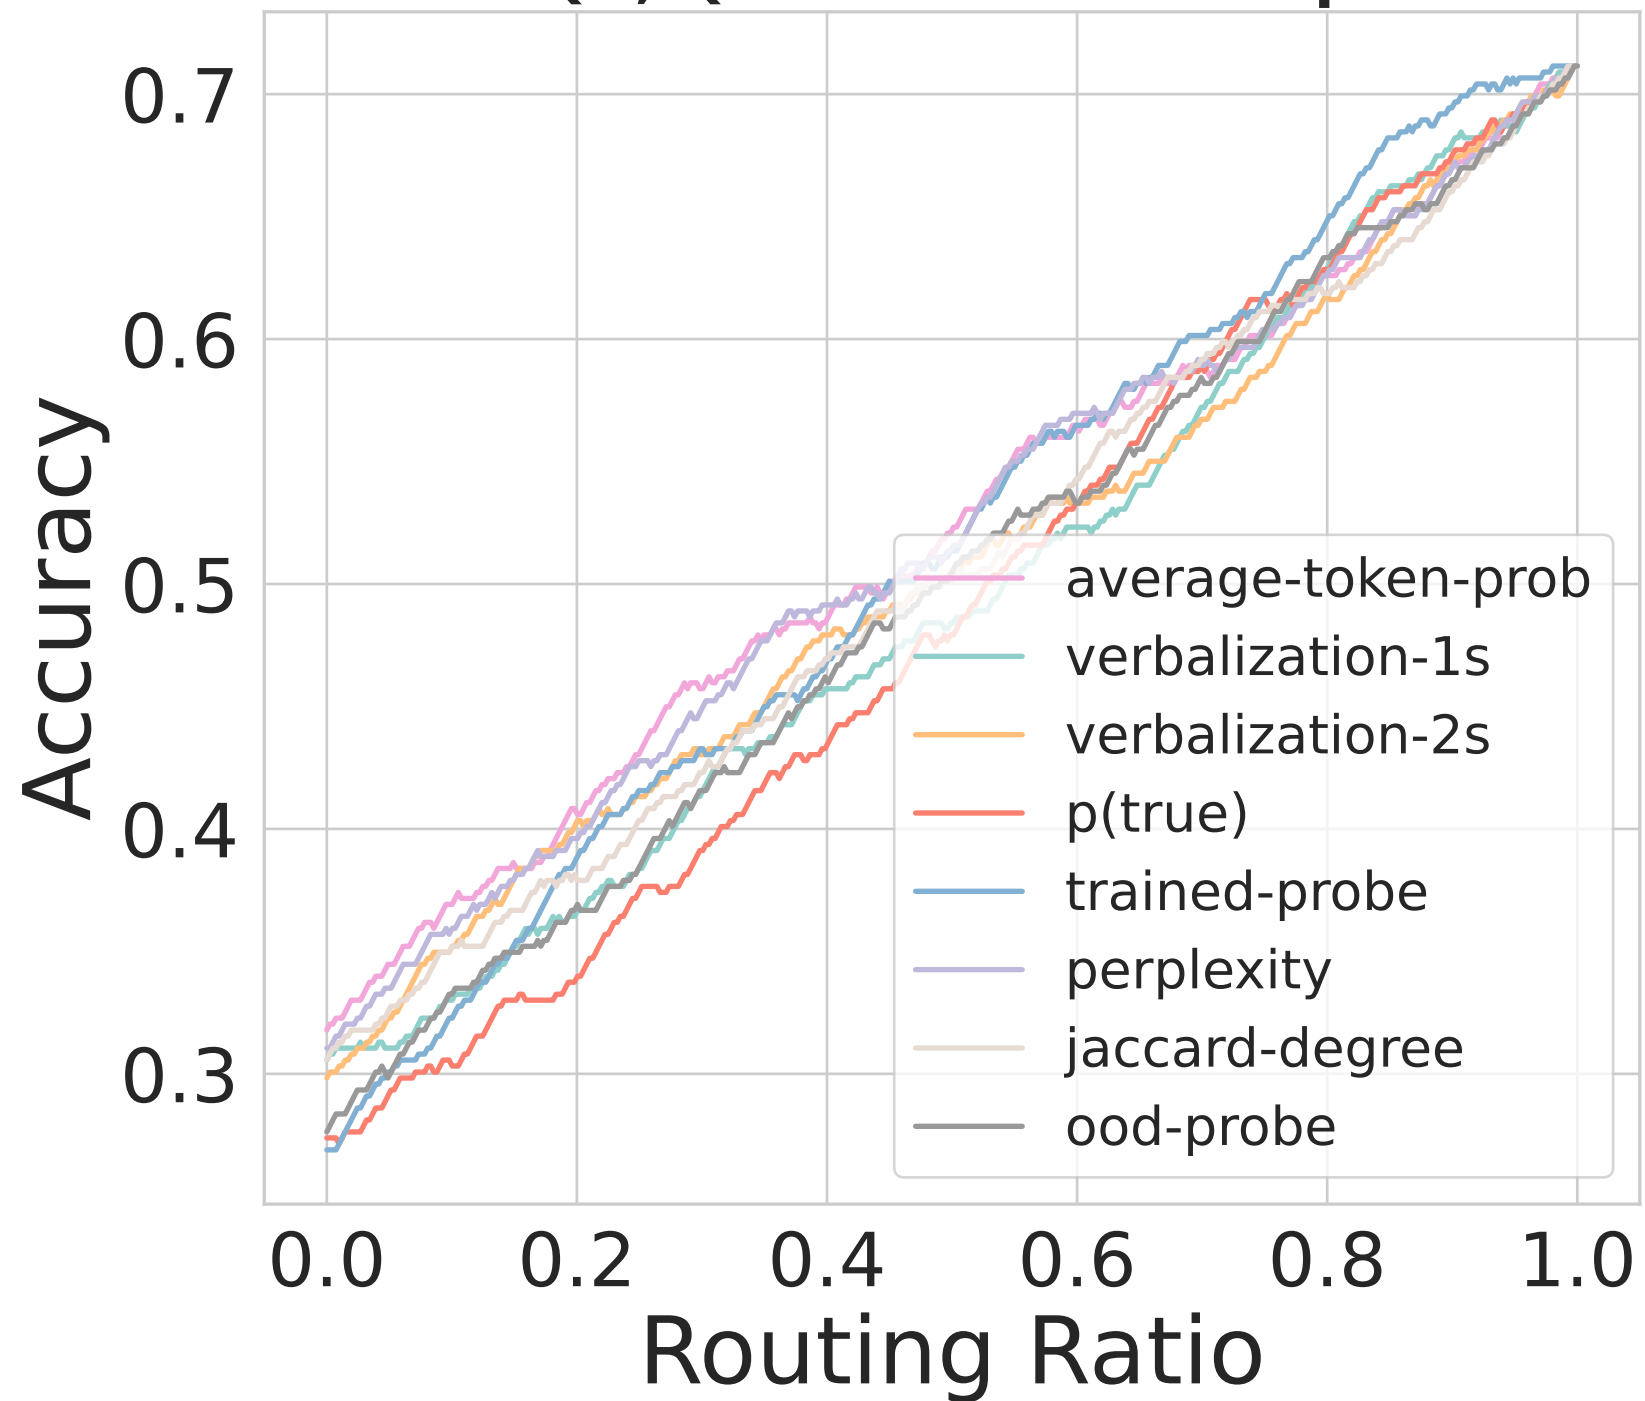

Supplement: supplementary_material [file rr_acc_truthful_qa_Qwen3-0.6B_dsR1.pdf › Routing_SLM_LLMs/Uncertainty-based Routing/w_legend/to_dsR1/rr_acc_truthful_qa_Qwen3-0.6B_dsR1.pdf]

**TruthfulQA, Qwen3-4B to DeepSeek-R1**

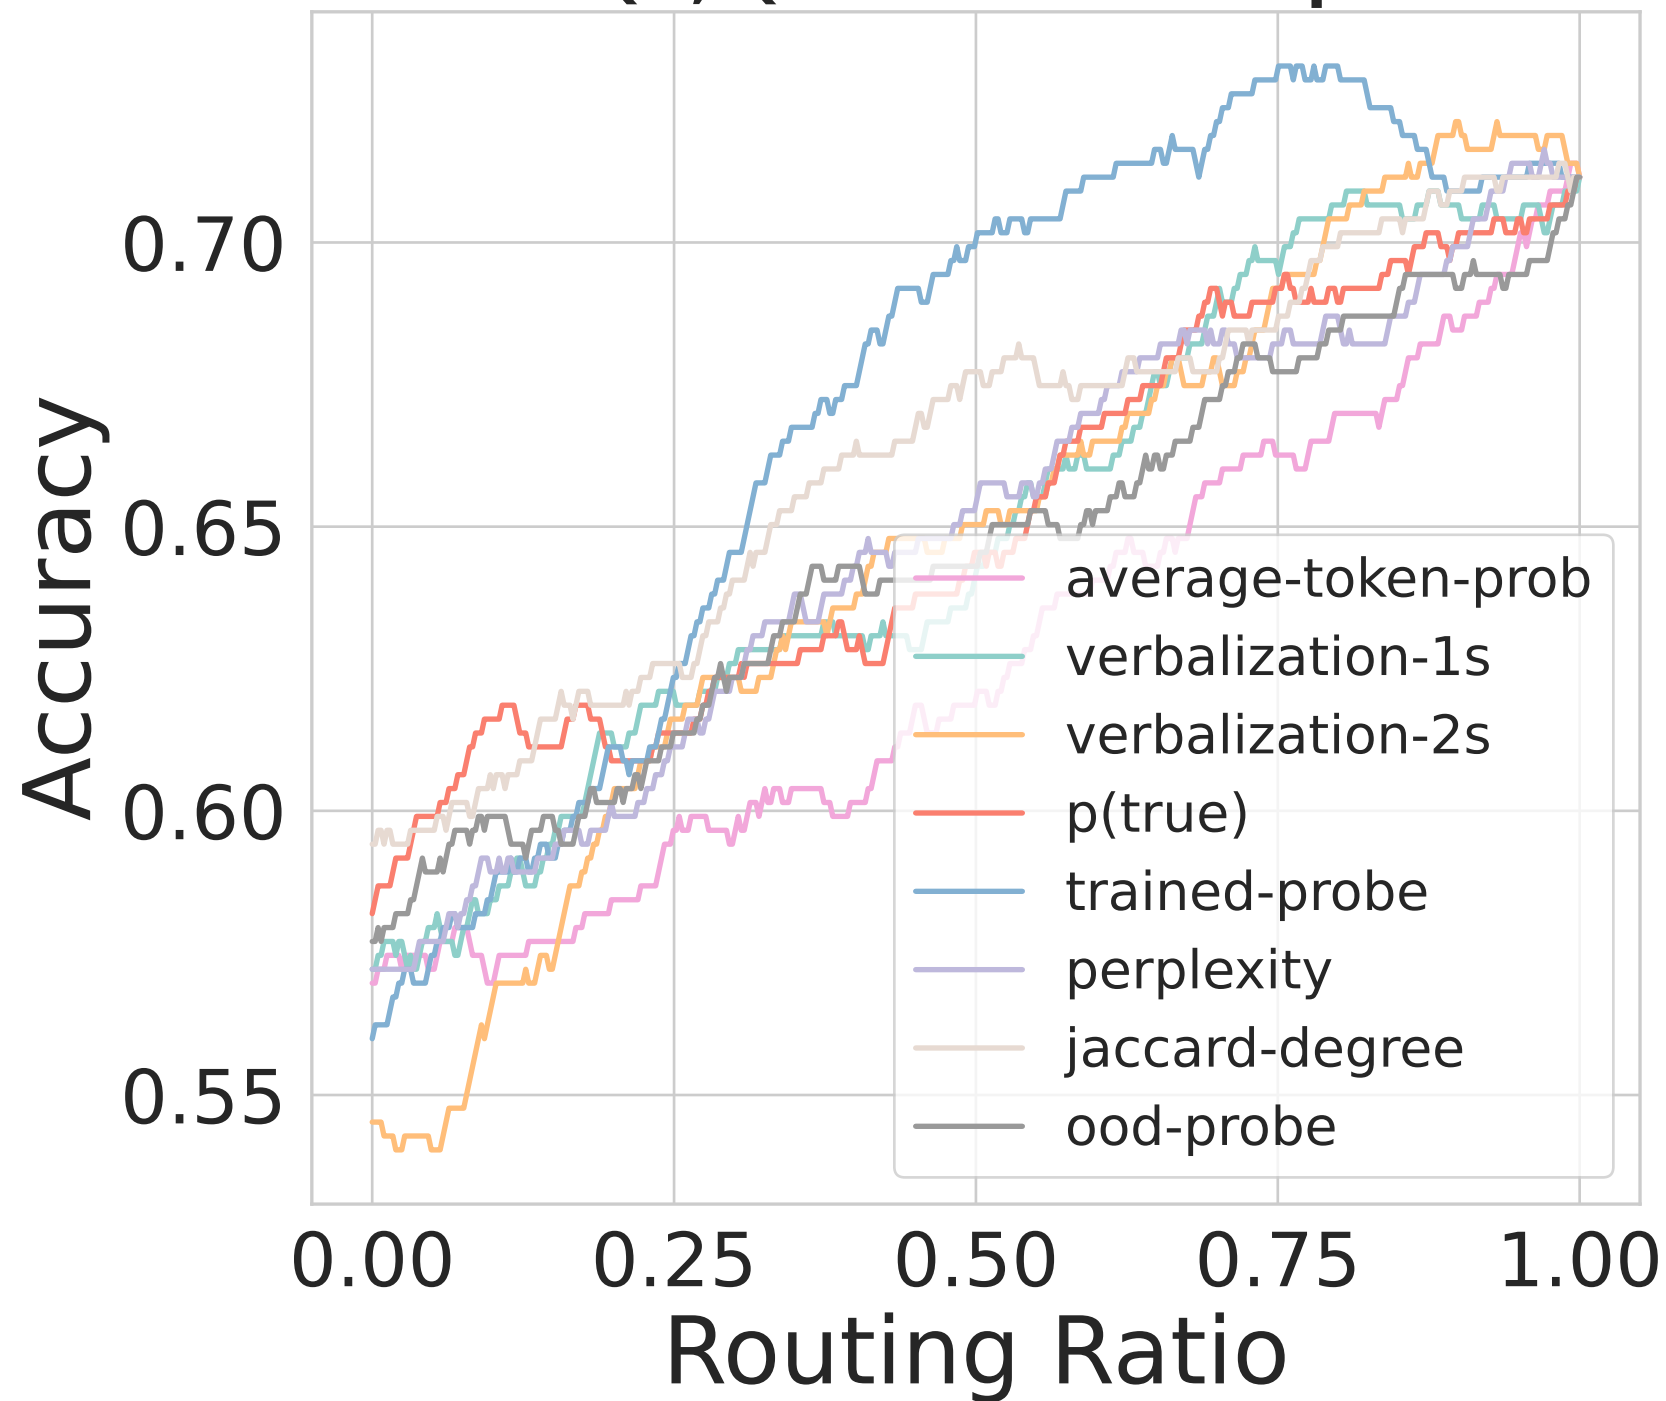

Supplement: supplementary_material [file rr_acc_truthful_qa_Qwen3-4B_dsR1.pdf › Routing_SLM_LLMs/Uncertainty-based Routing/w_legend/to_dsR1/rr_acc_truthful_qa_Qwen3-4B_dsR1.pdf]

# TruthfulQA, granite-3.1-8b to DeepSeek-R1

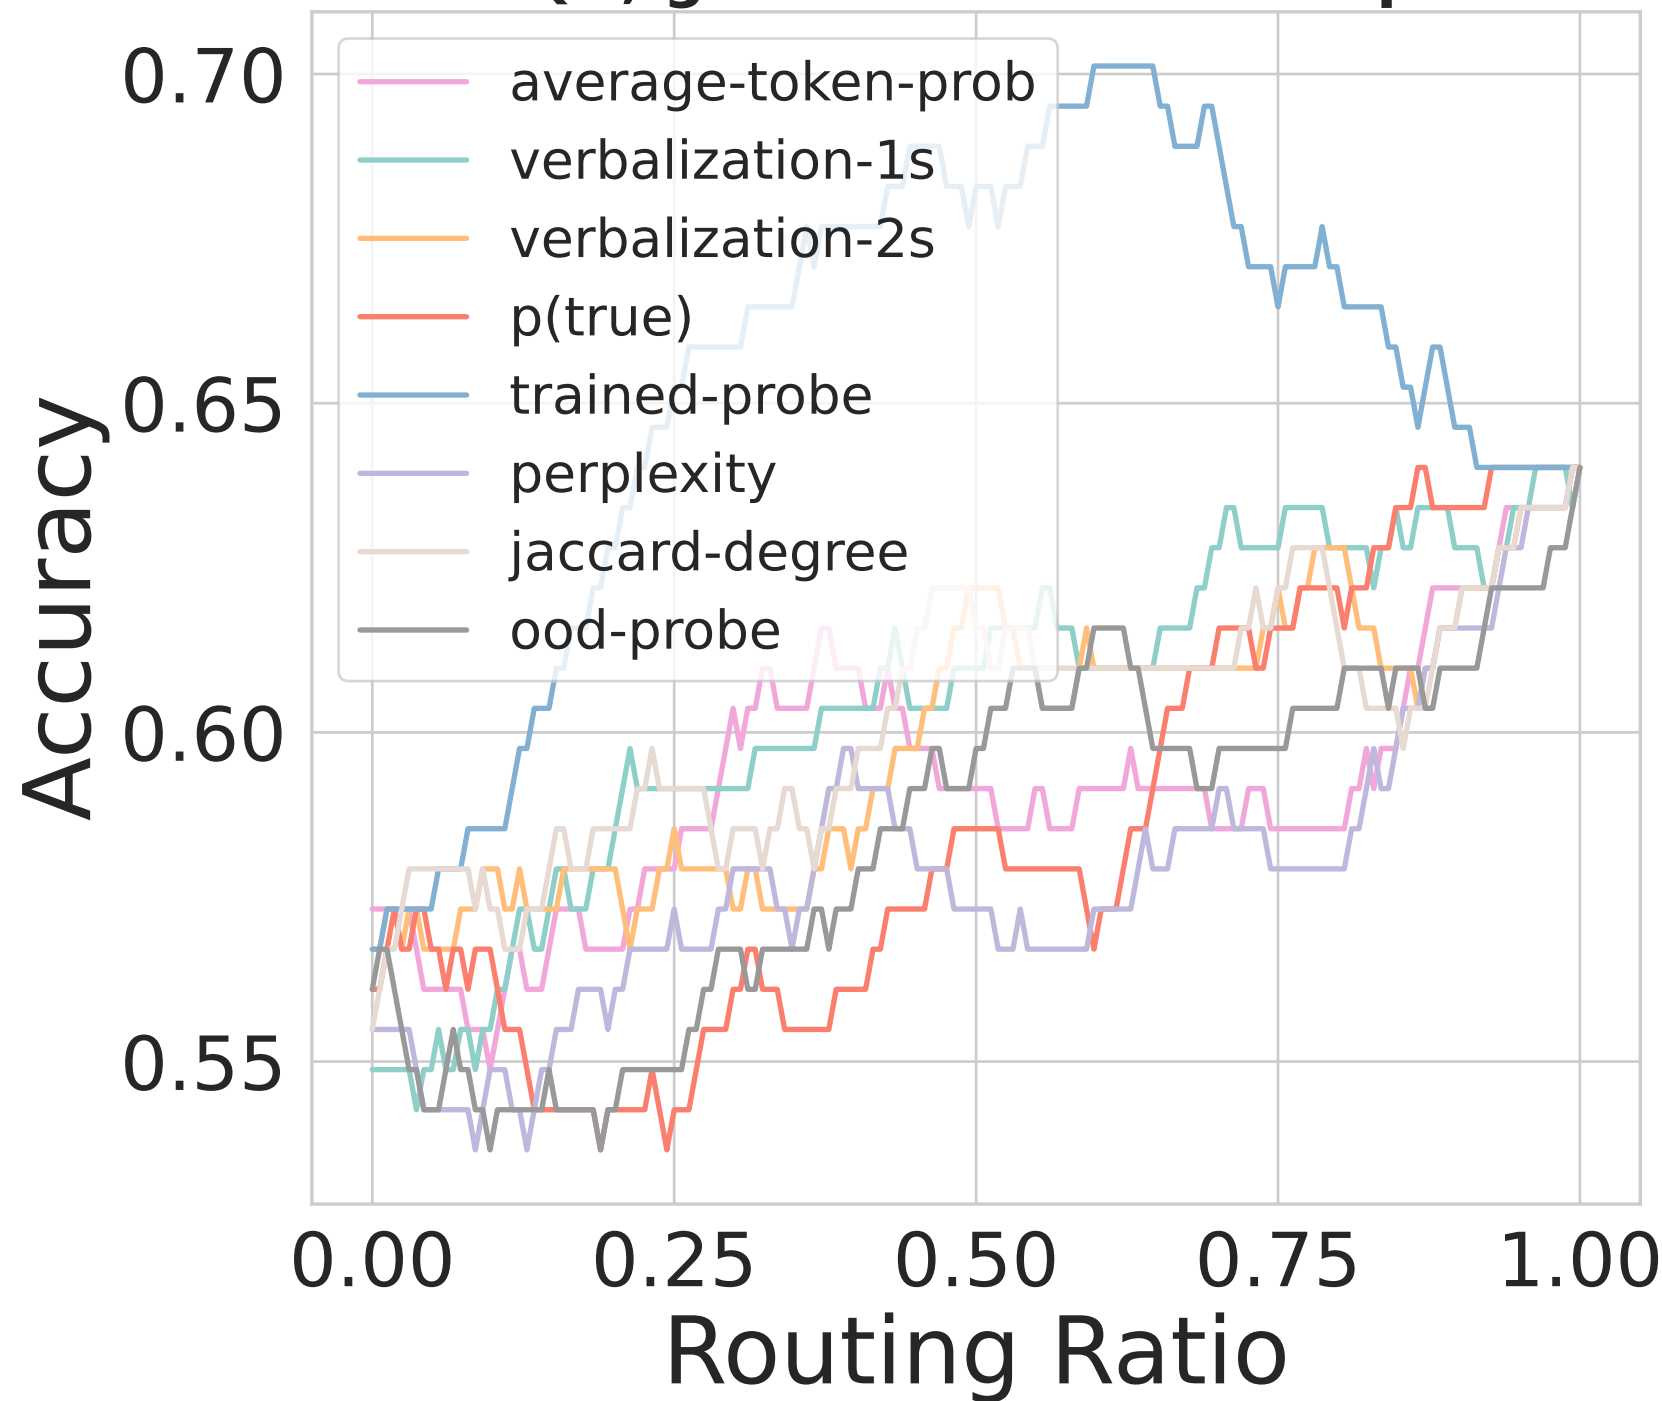

Supplement: supplementary_material [file rr_acc_truthful_qa_granite-3.1-8b_dsR1.pdf › Routing_SLM_LLMs/Uncertainty-based Routing/w_legend/to_dsR1/rr_acc_truthful_qa_granite-3.1-8b_dsR1.pdf]

# TruthfulQA, llama-3.1-8b to DeepSeek-R1

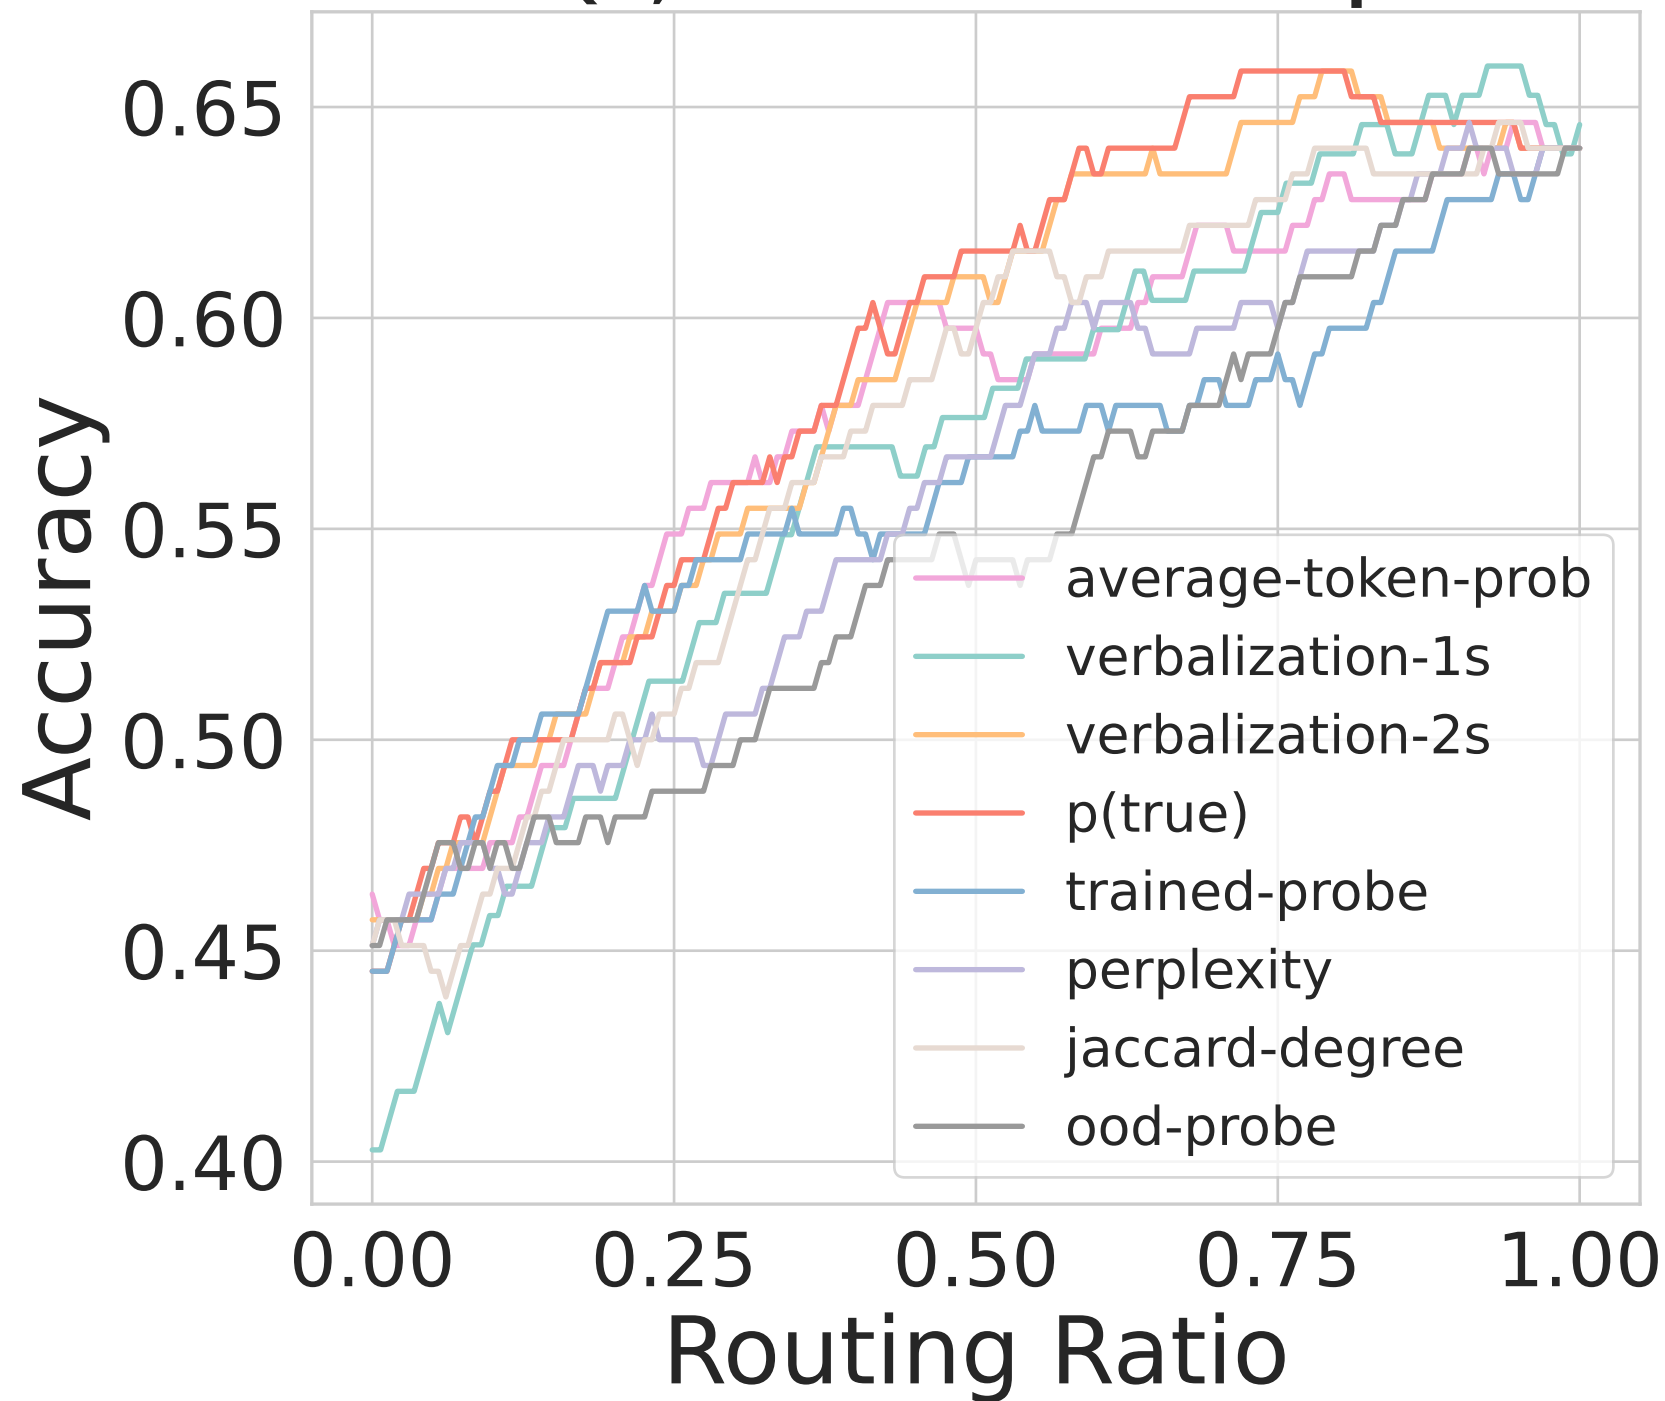

Supplement: supplementary_material [file rr_acc_truthful_qa_llama-3.1-8b_dsR1.pdf › Routing_SLM_LLMs/Uncertainty-based Routing/w_legend/to_dsR1/rr_acc_truthful_qa_llama-3.1-8b_dsR1.pdf]

# TruthfulQA, llama-3.2-1b to DeepSeek-R1

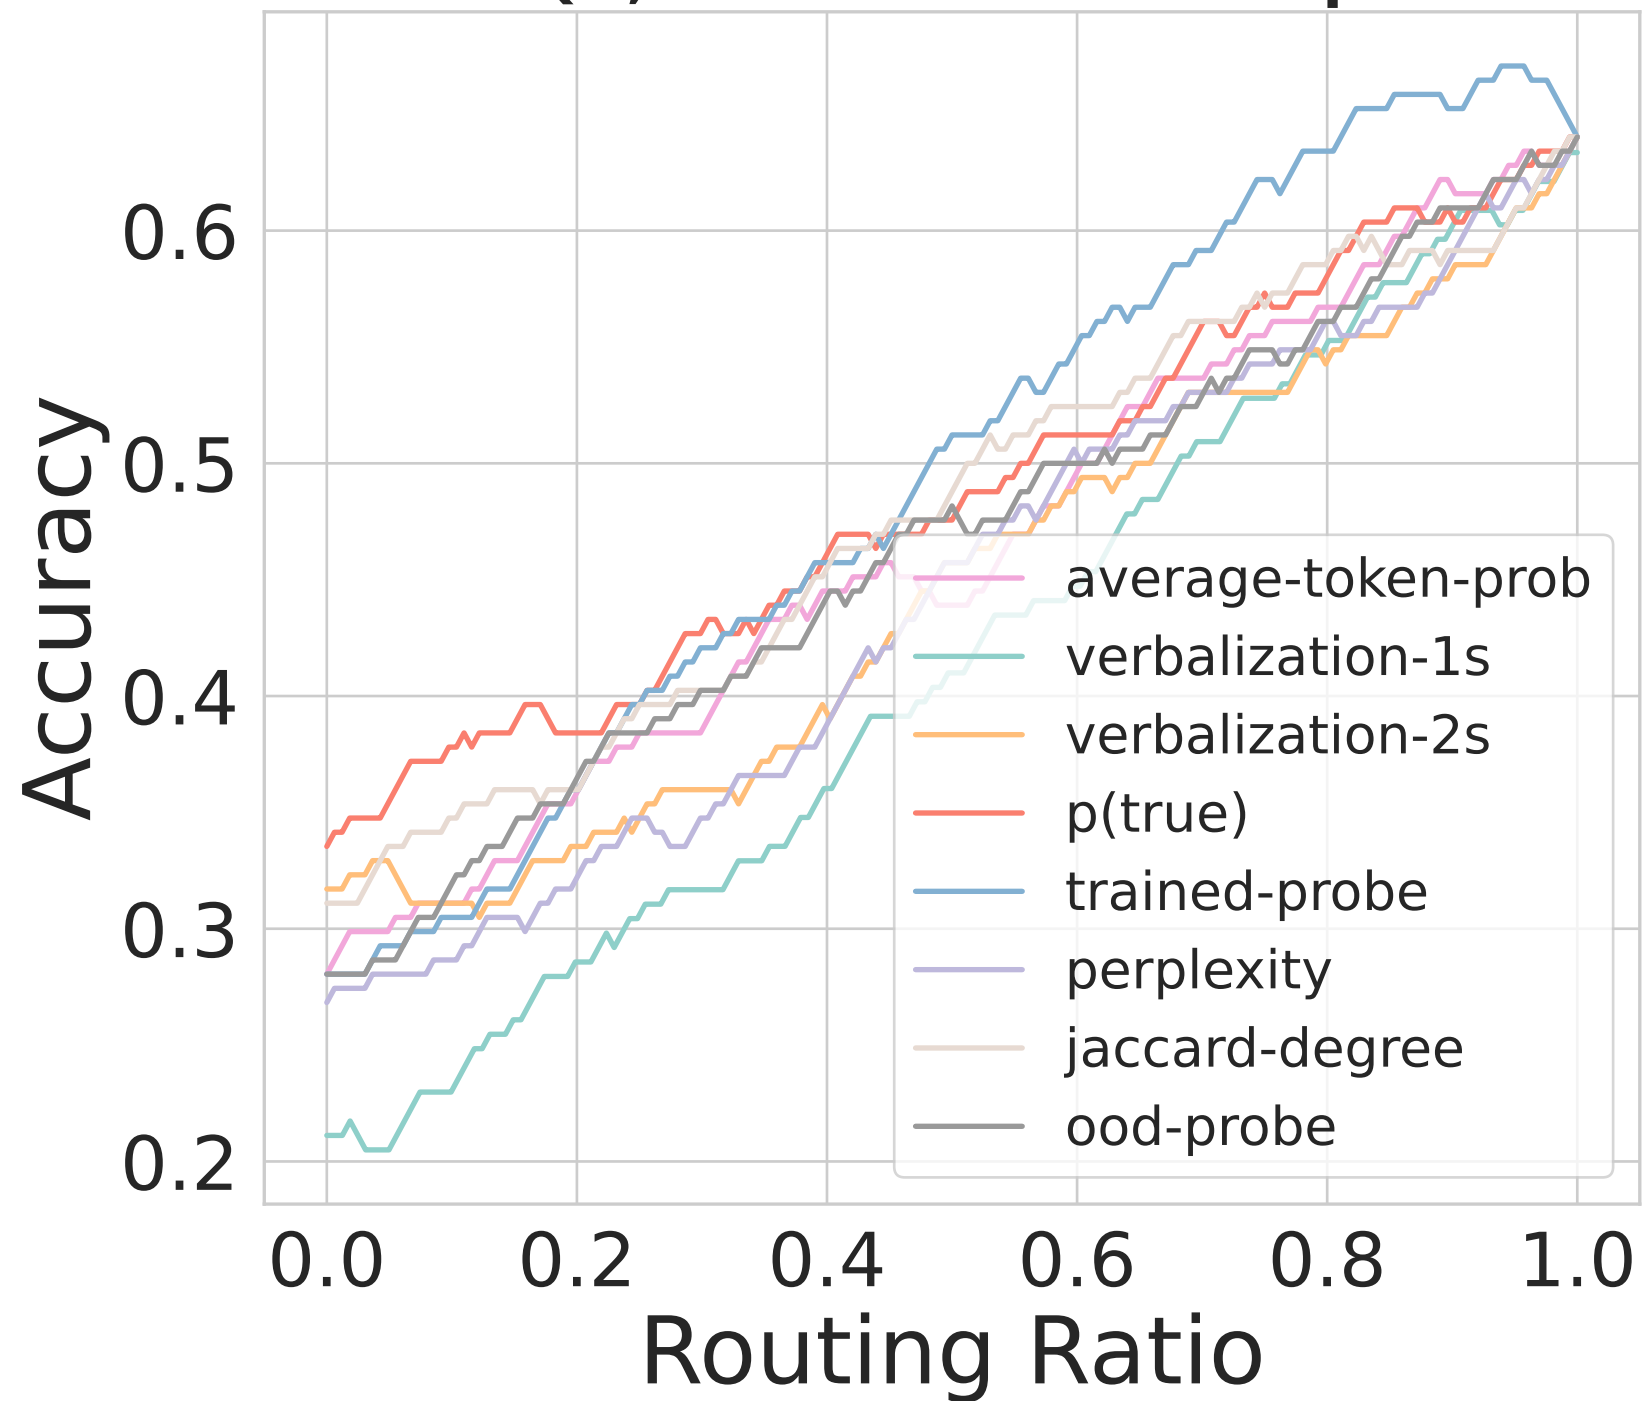

Supplement: supplementary_material [file rr_acc_truthful_qa_llama-3.2-1b_dsR1.pdf › Routing_SLM_LLMs/Uncertainty-based Routing/w_legend/to_dsR1/rr_acc_truthful_qa_llama-3.2-1b_dsR1.pdf]

# TruthfulQA, llama-3.2-3b to DeepSeek-R1

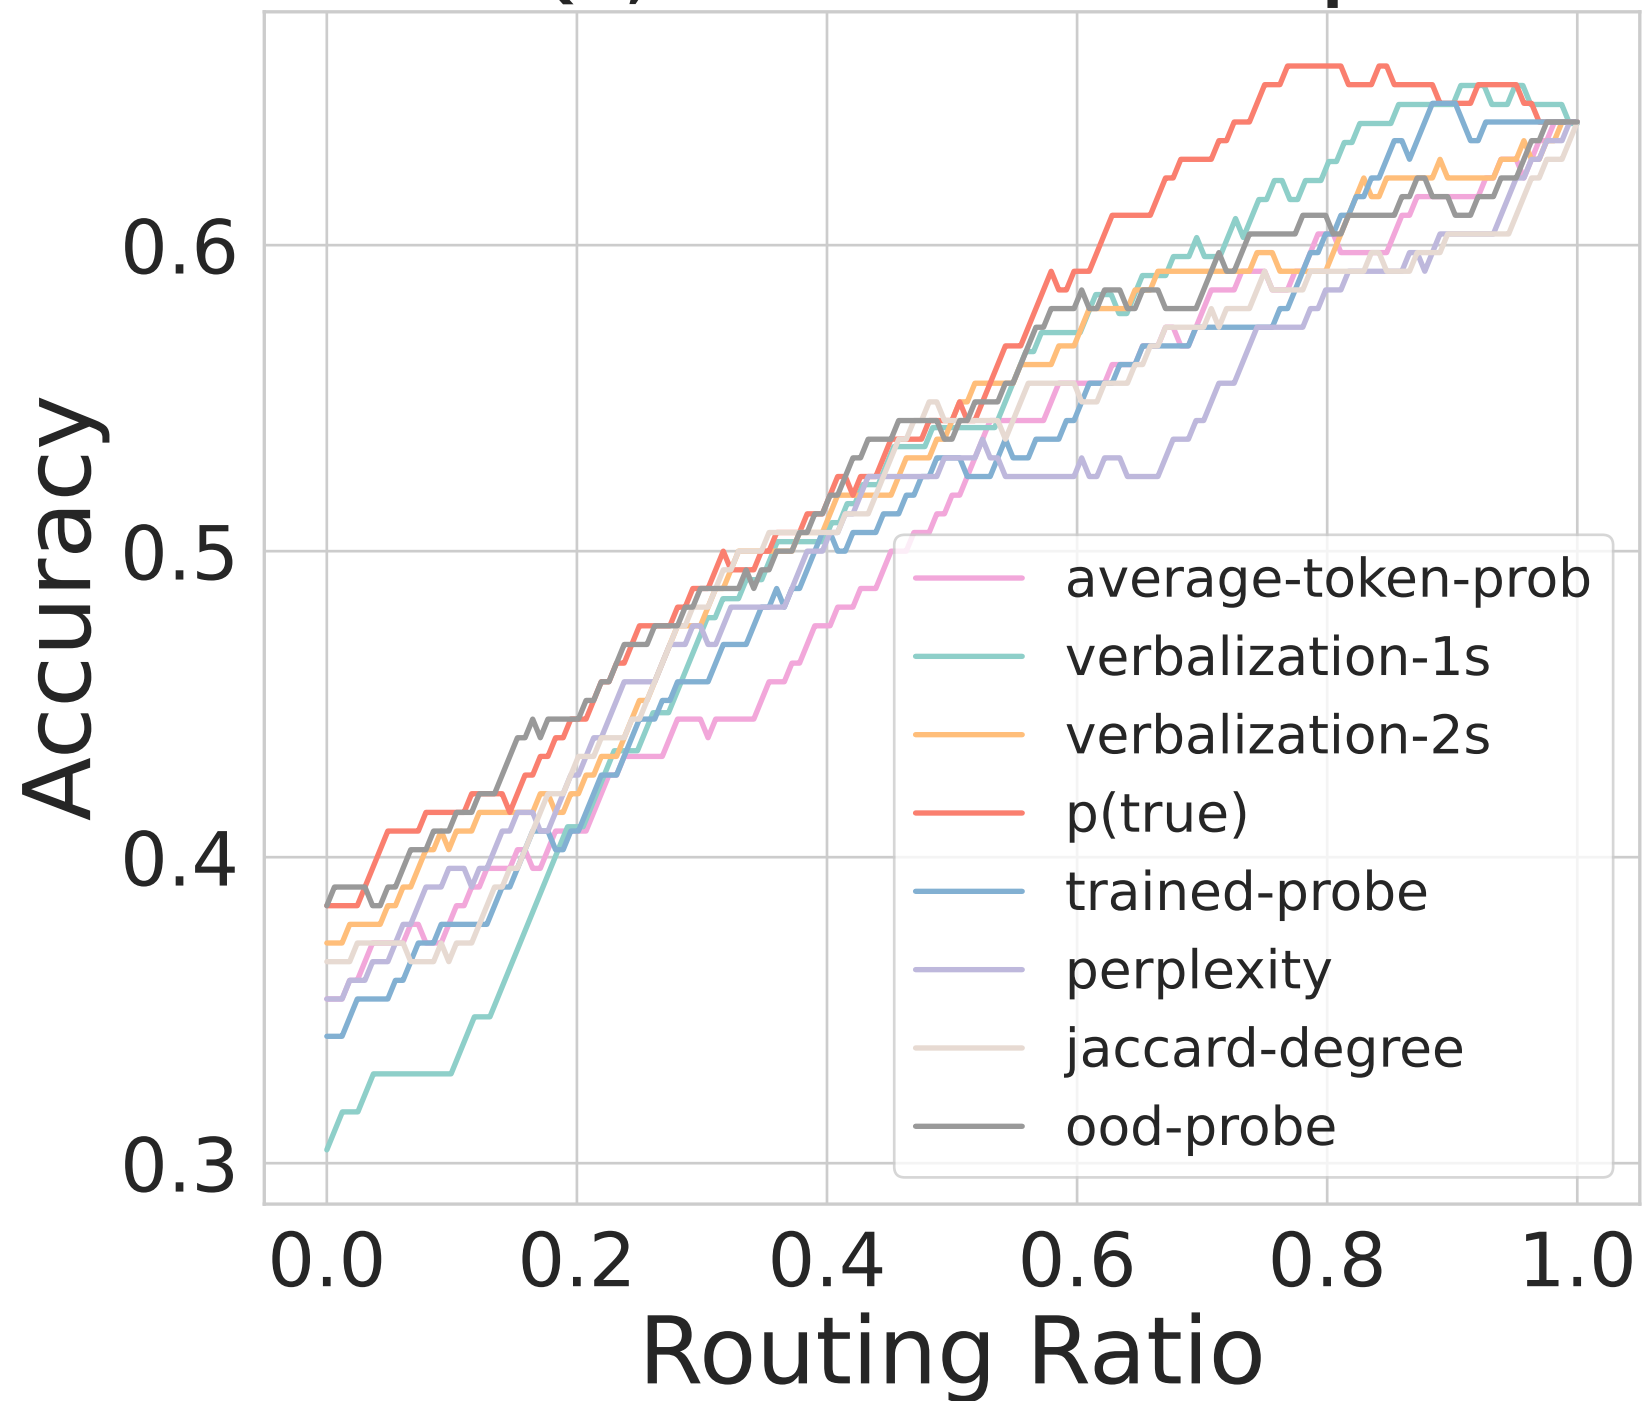

Supplement: supplementary_material [file rr_acc_truthful_qa_llama-3.2-3b_dsR1.pdf › Routing_SLM_LLMs/Uncertainty-based Routing/w_legend/to_dsR1/rr_acc_truthful_qa_llama-3.2-3b_dsR1.pdf]

# TruthfulQA, mistral-7b to DeepSeek-R1

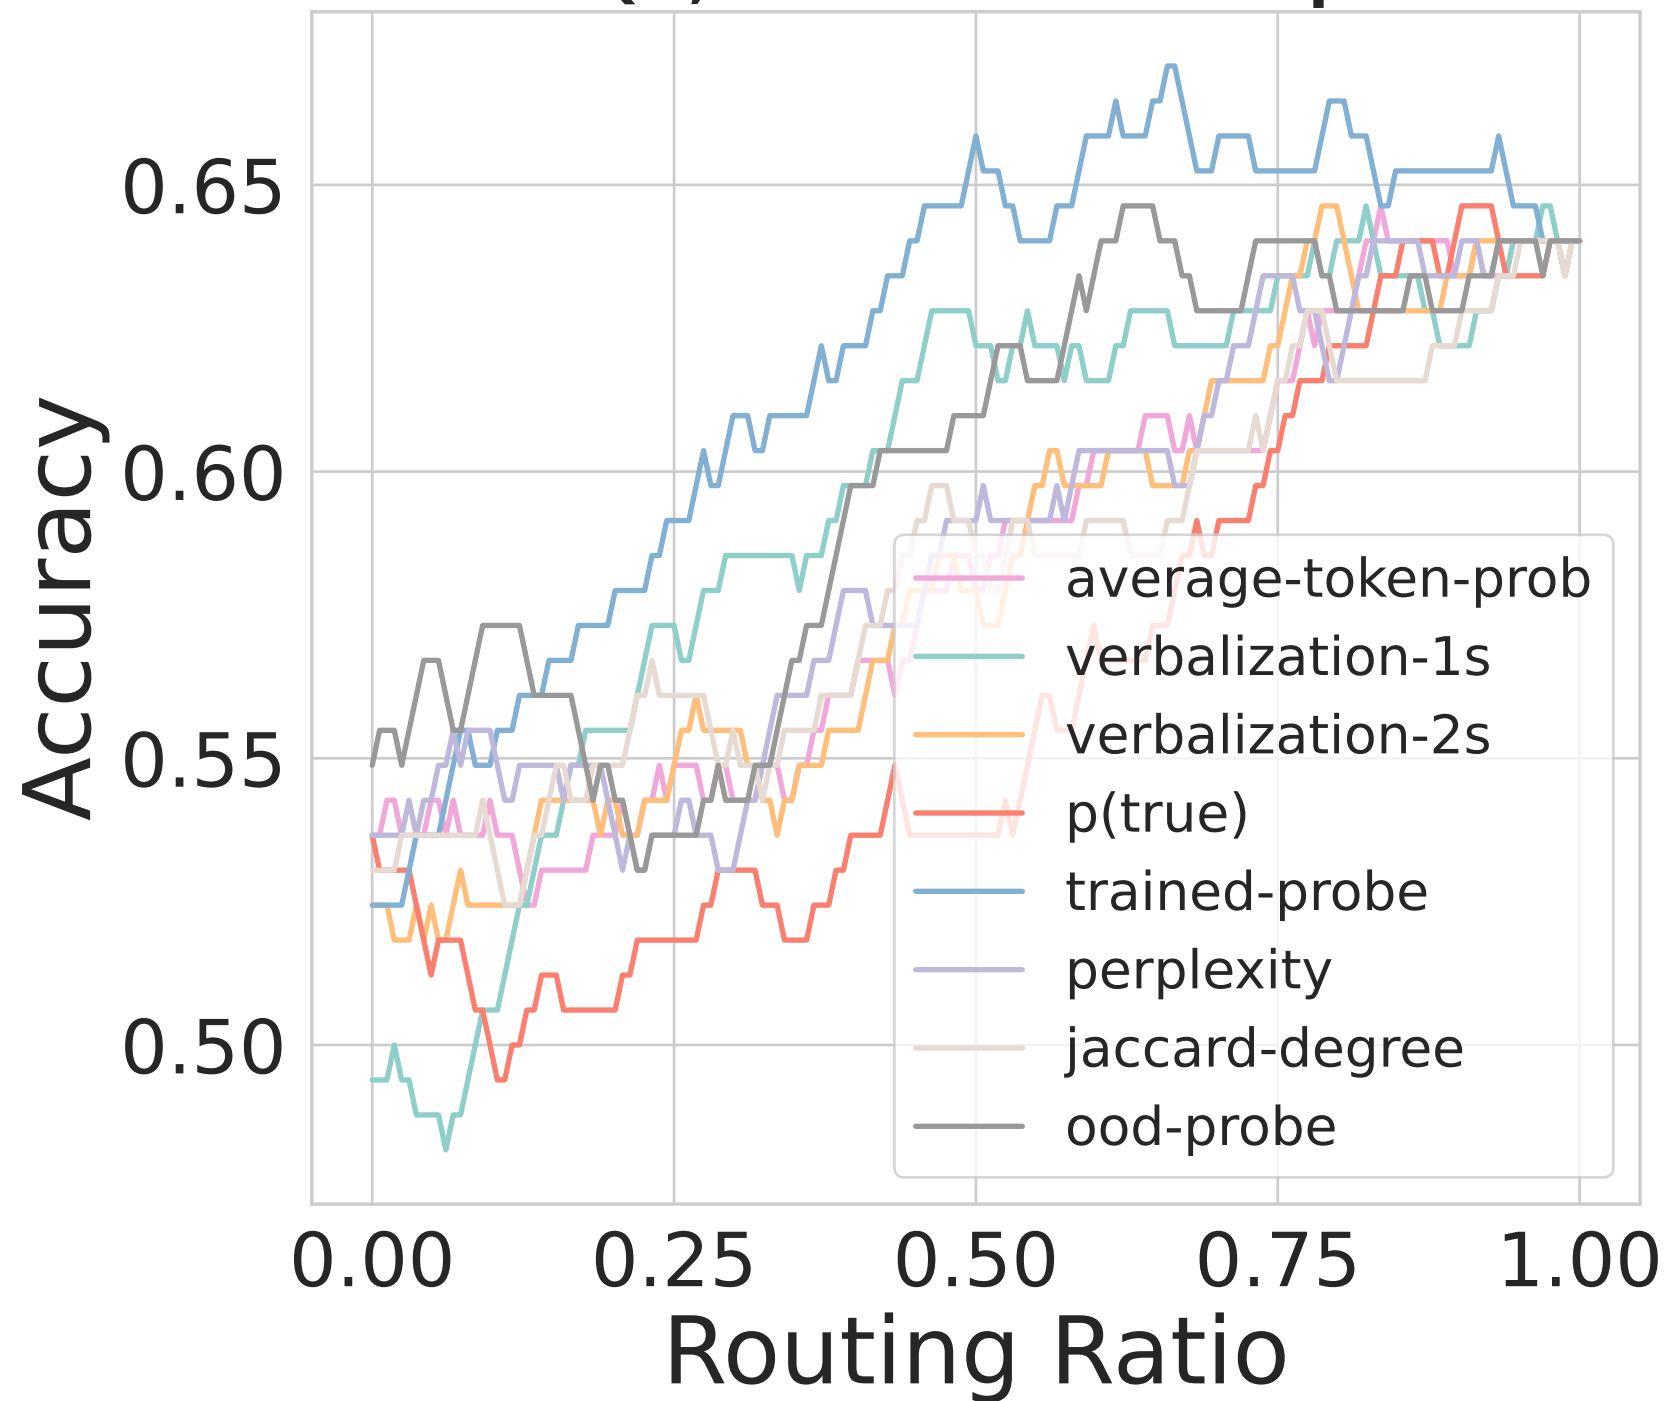

Supplement: supplementary_material [file rr_acc_truthful_qa_mistral-7b_dsR1.pdf › Routing_SLM_LLMs/Uncertainty-based Routing/w_legend/to_dsR1/rr_acc_truthful_qa_mistral-7b_dsR1.pdf]

# TruthfulQA, phi-3.5-mini to DeepSeek-R1

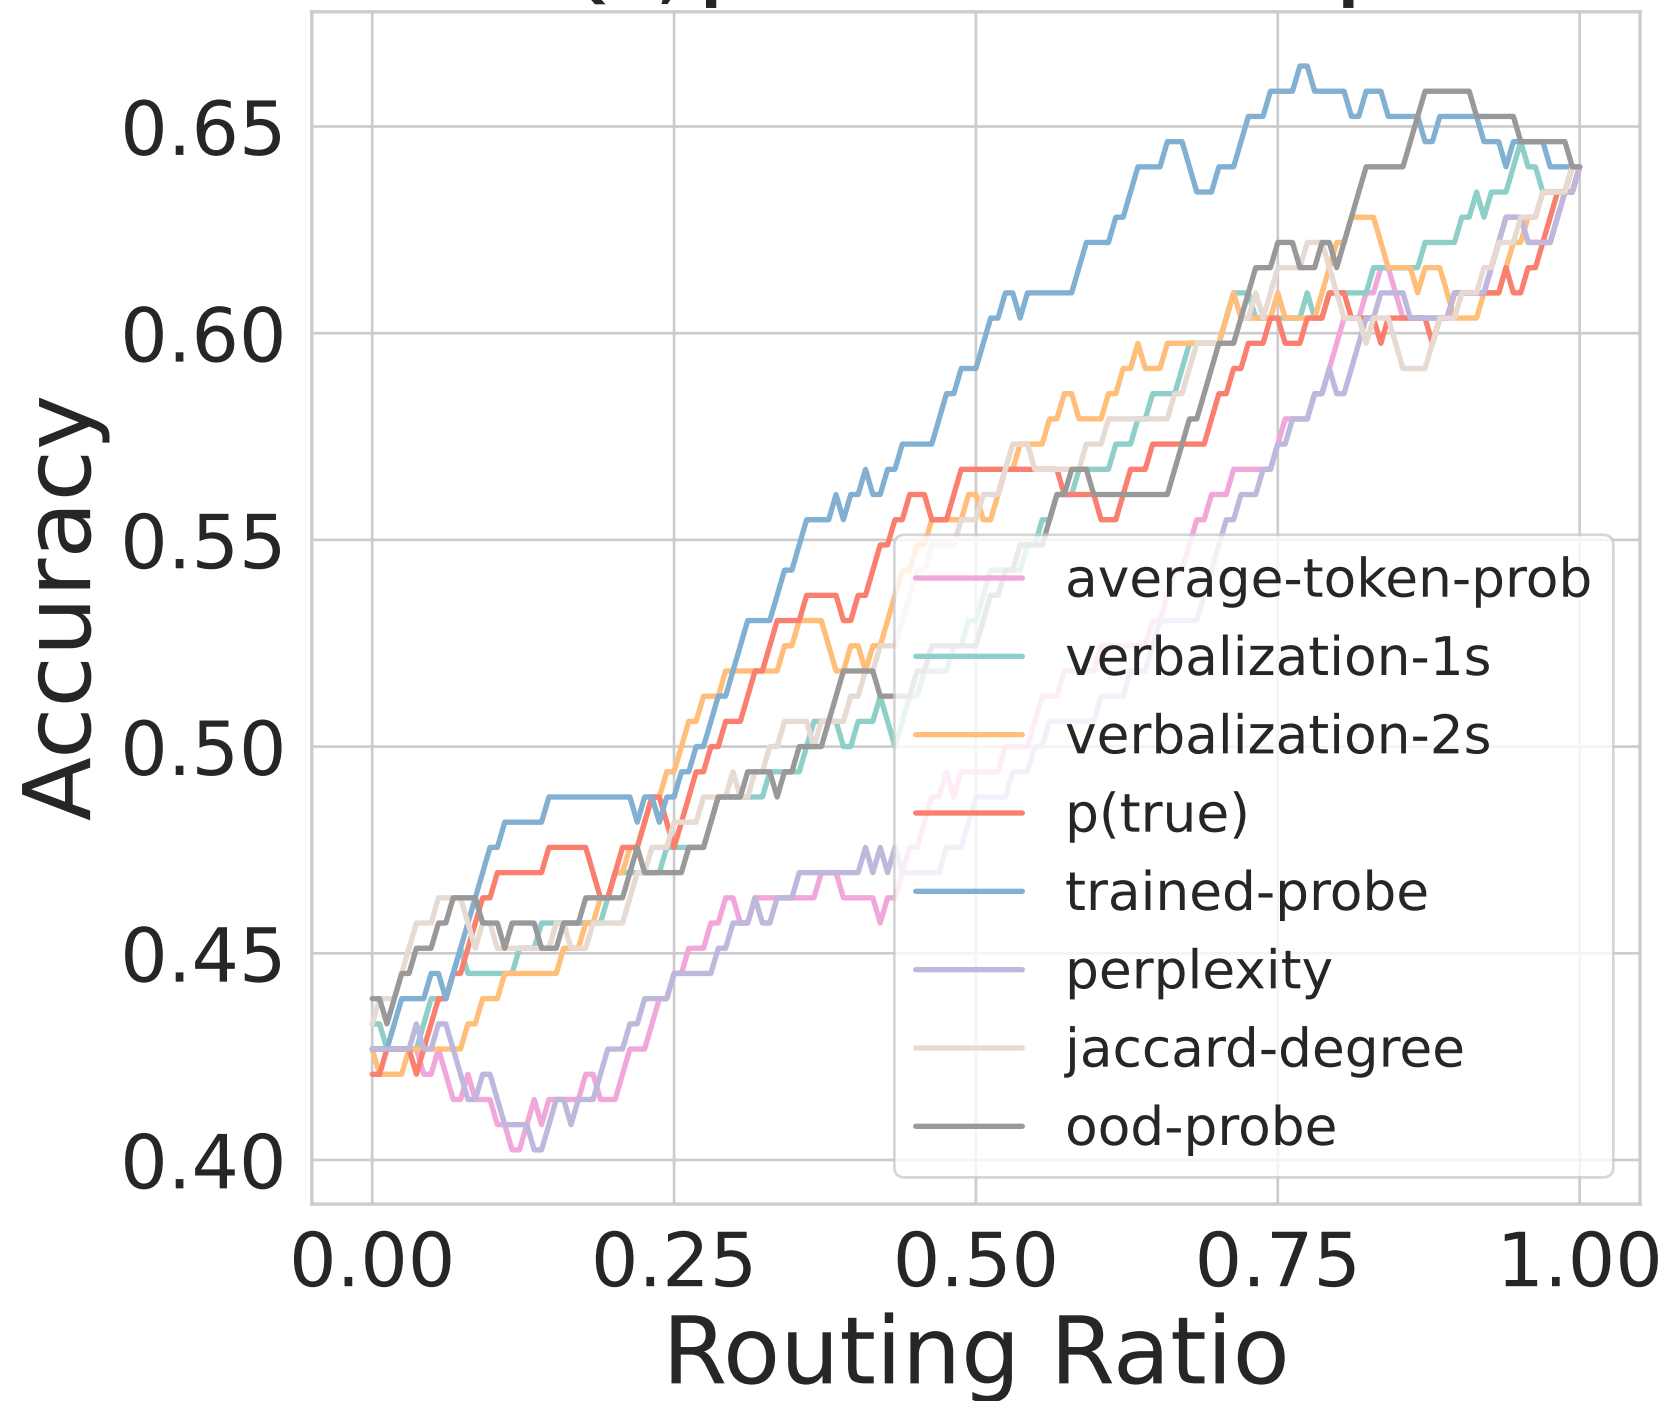

Supplement: supplementary_material [file rr_acc_truthful_qa_phi-3.5-mini_dsR1.pdf › Routing_SLM_LLMs/Uncertainty-based Routing/w_legend/to_dsR1/rr_acc_truthful_qa_phi-3.5-mini_dsR1.pdf]

# TruthfulQA, phi-4-mini-reasoning to DeepSeek-R1

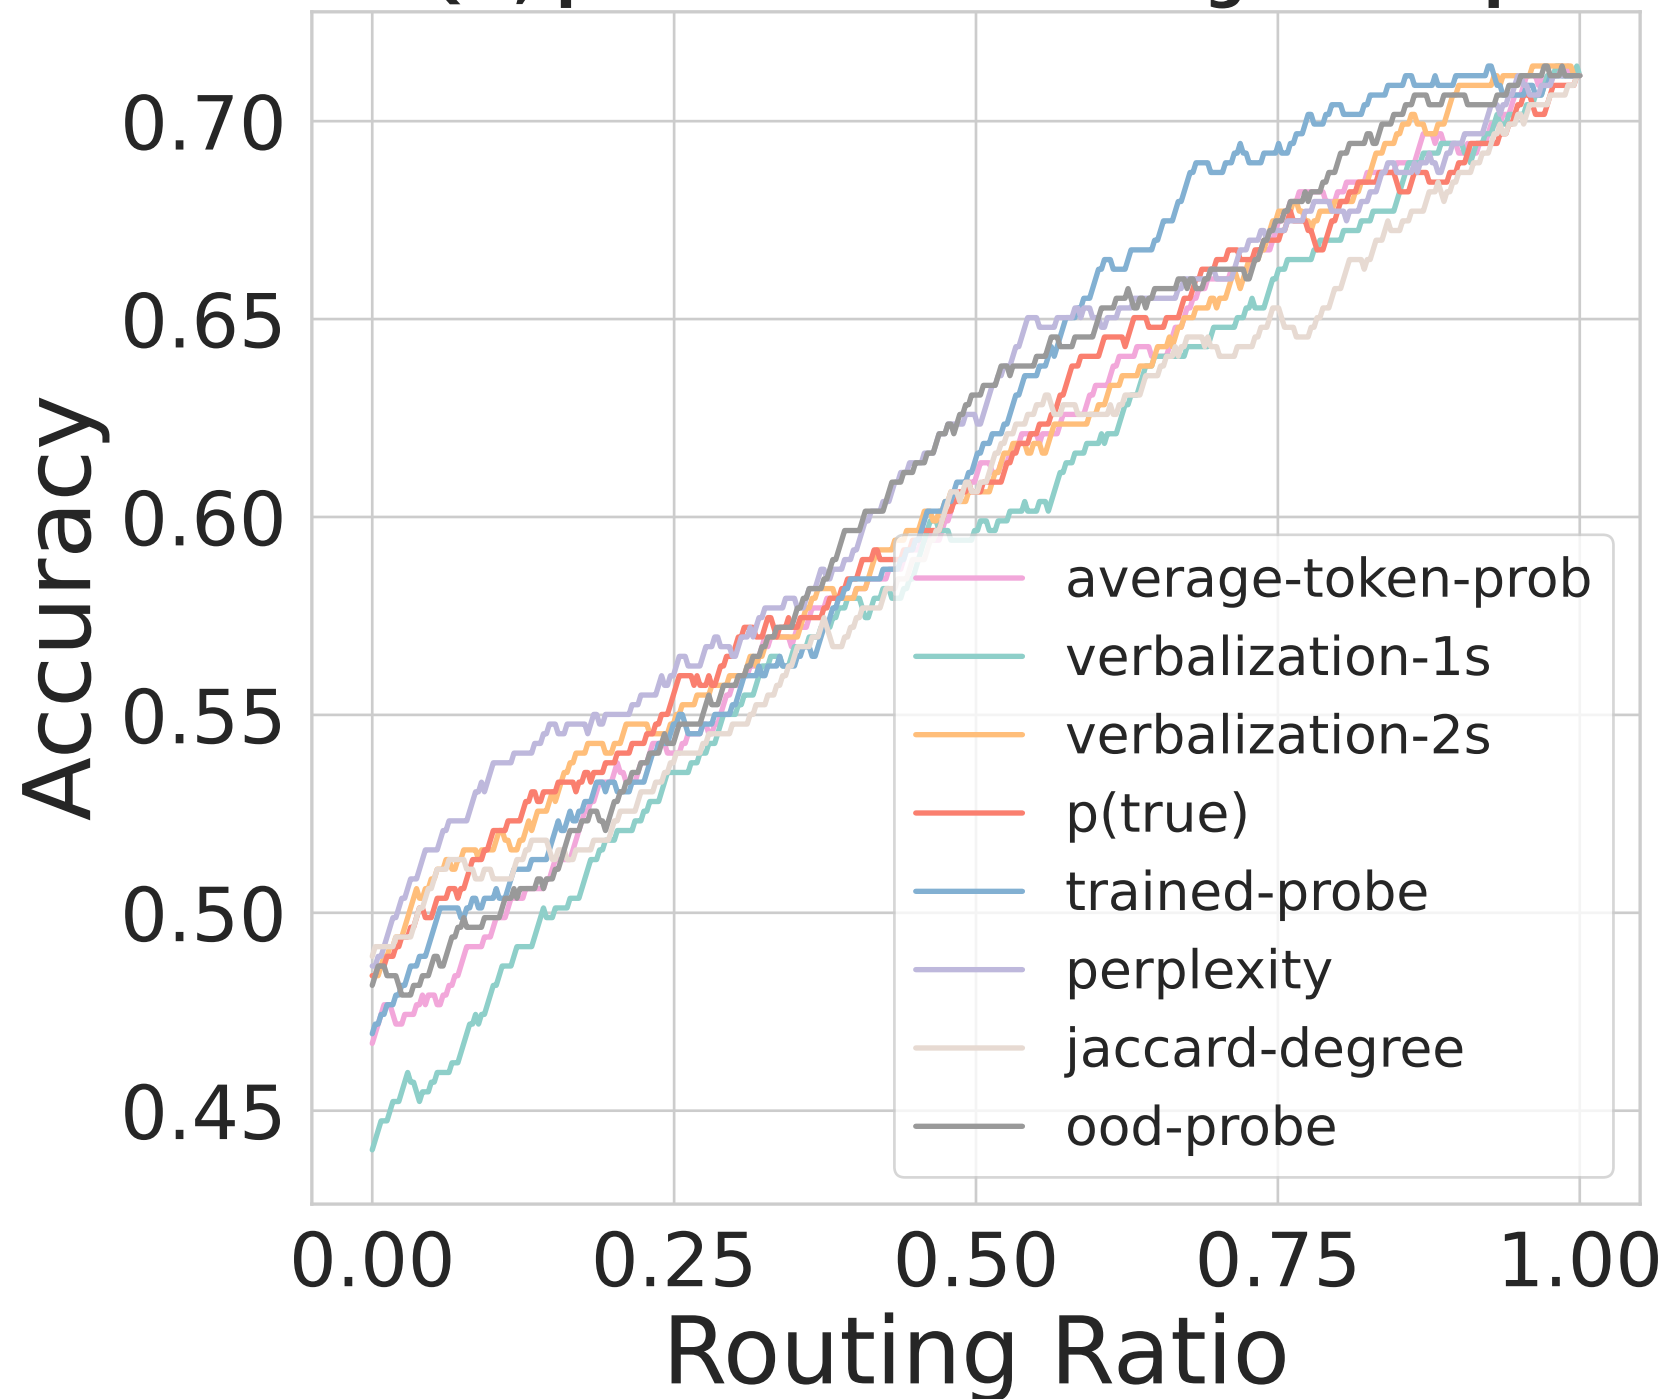

Supplement: supplementary_material [file rr_acc_truthful_qa_phi-4-mini-reasoning_dsR1.pdf › Routing_SLM_LLMs/Uncertainty-based Routing/w_legend/to_dsR1/rr_acc_truthful_qa_phi-4-mini-reasoning_dsR1.pdf]

# TruthfulQA, qwen-2.5-7b to DeepSeek-R1

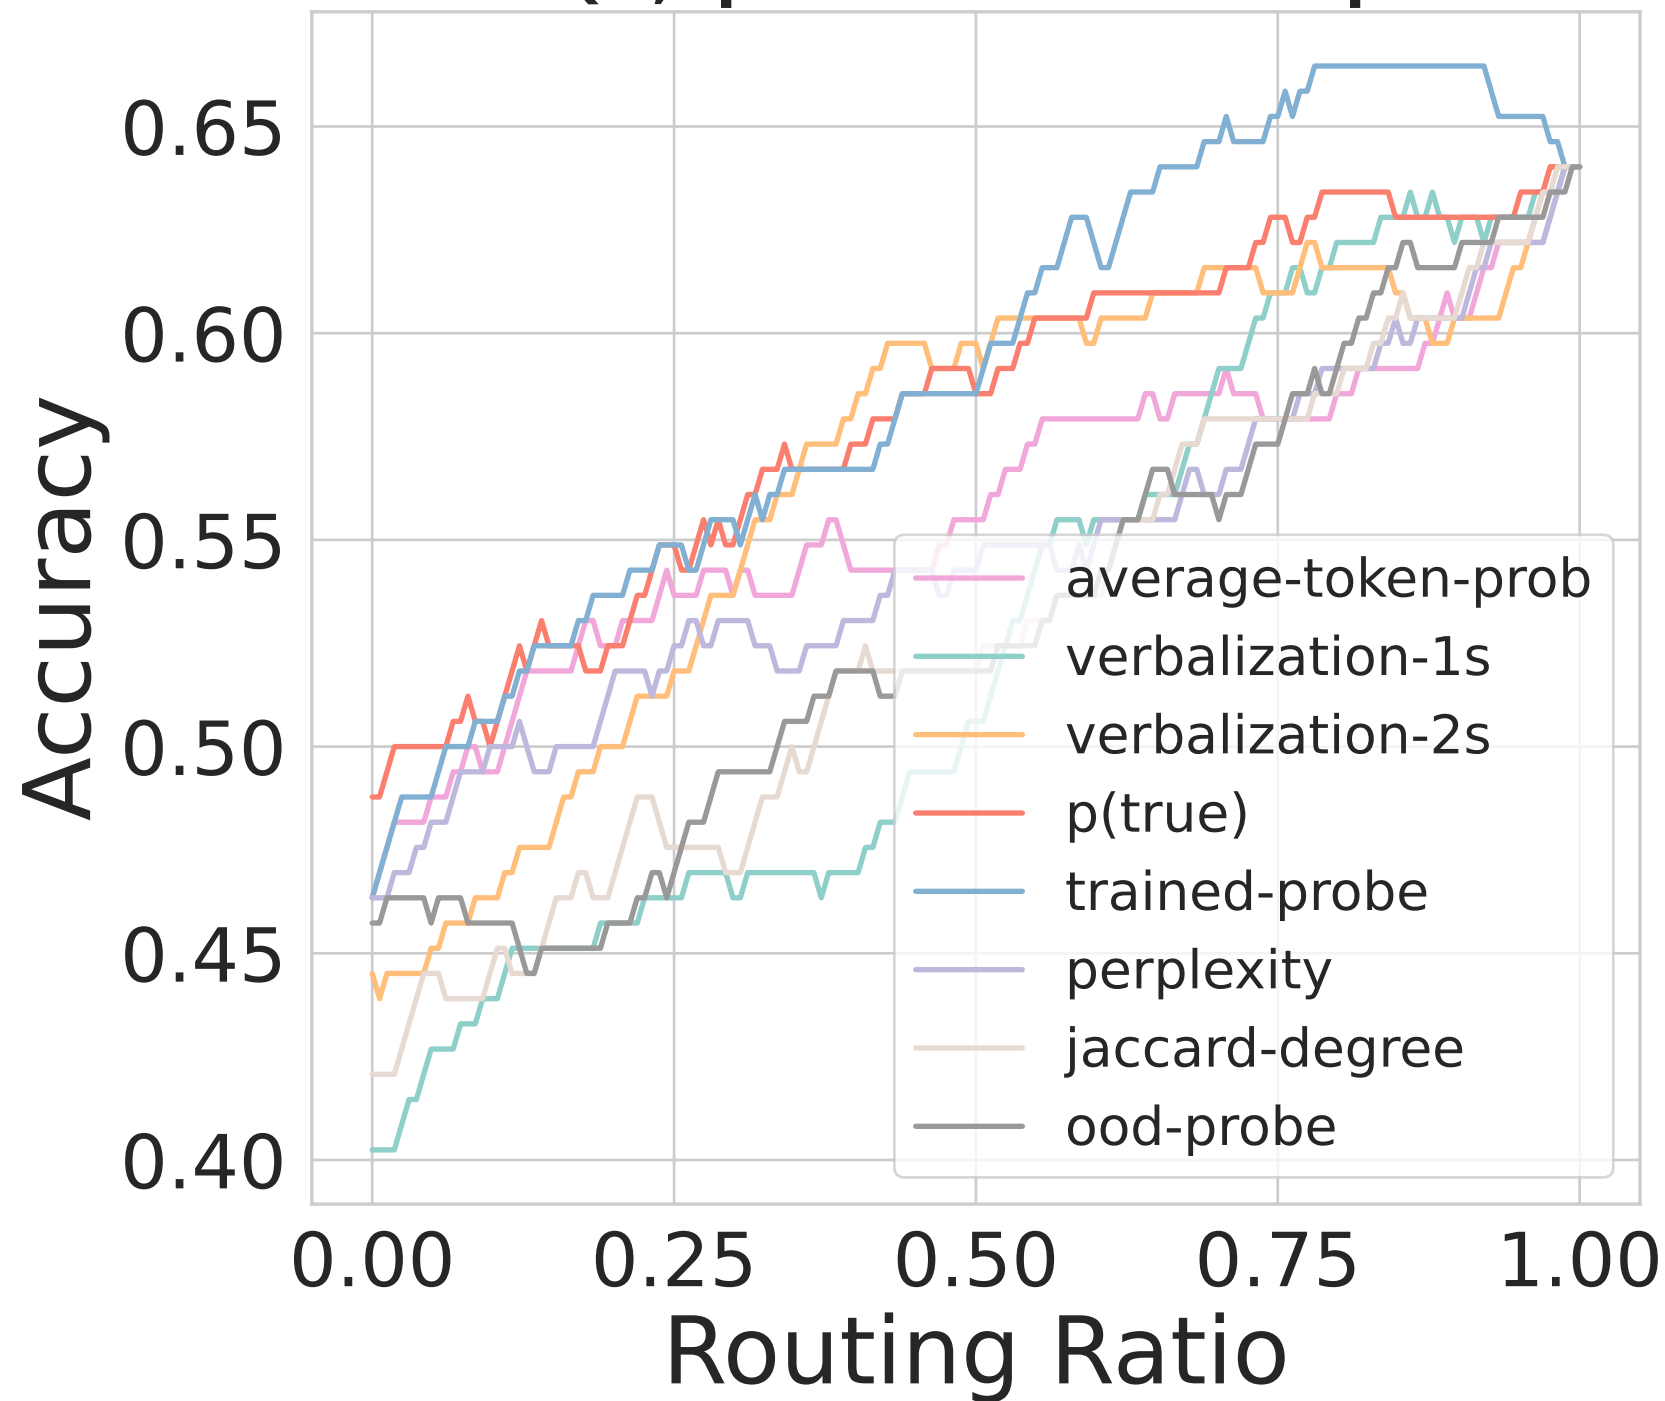

Supplement: supplementary_material [file rr_acc_truthful_qa_qwen-2.5-7b_dsR1.pdf › Routing_SLM_LLMs/Uncertainty-based Routing/w_legend/to_dsR1/rr_acc_truthful_qa_qwen-2.5-7b_dsR1.pdf]

# TruthfulQA, rwkv to DeepSeek-R1

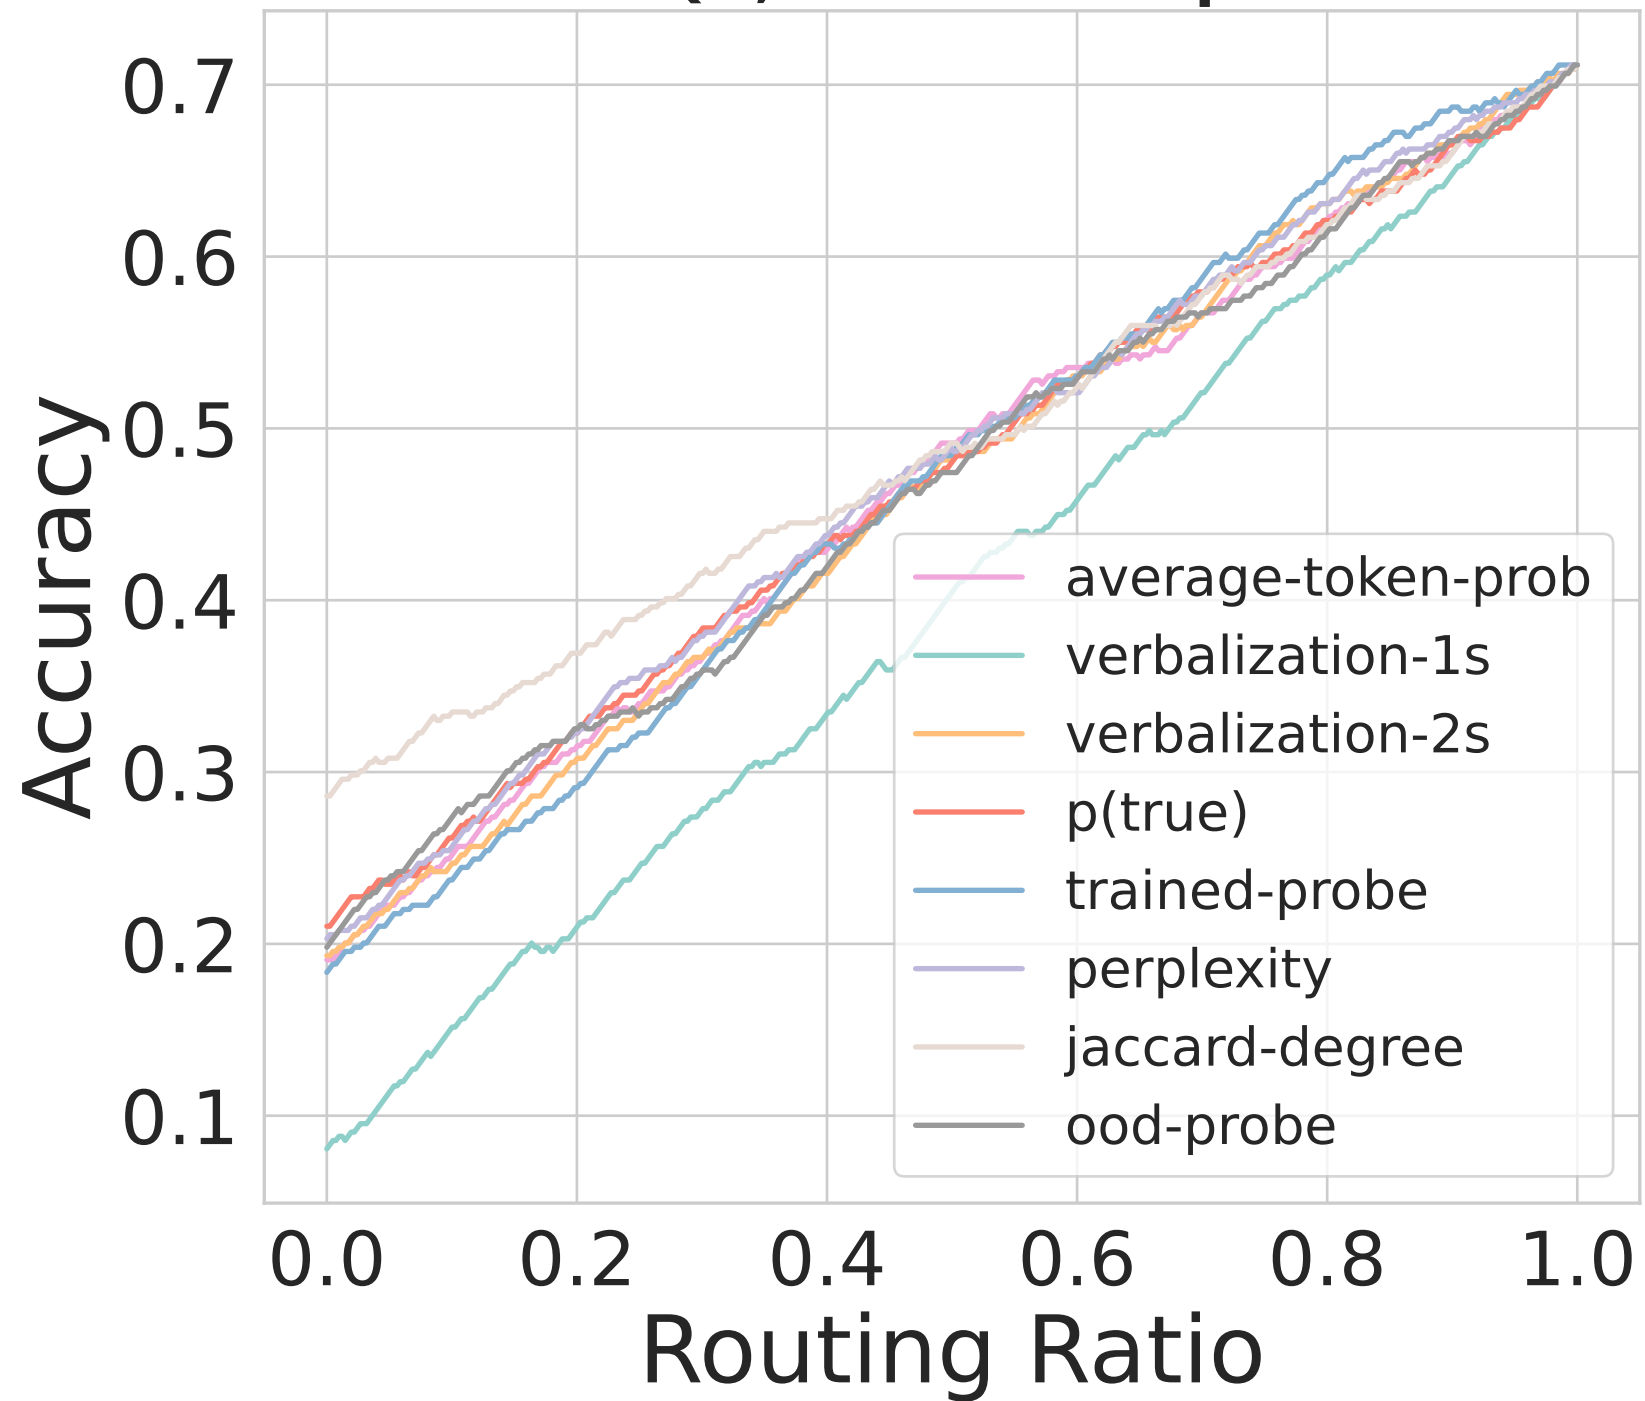

Supplement: supplementary_material [file rr_acc_truthful_qa_rwkv_dsR1.pdf › Routing_SLM_LLMs/Uncertainty-based Routing/w_legend/to_dsR1/rr_acc_truthful_qa_rwkv_dsR1.pdf]

# WinoGrande, Qwen3-0.6B to DeepSeek-R1

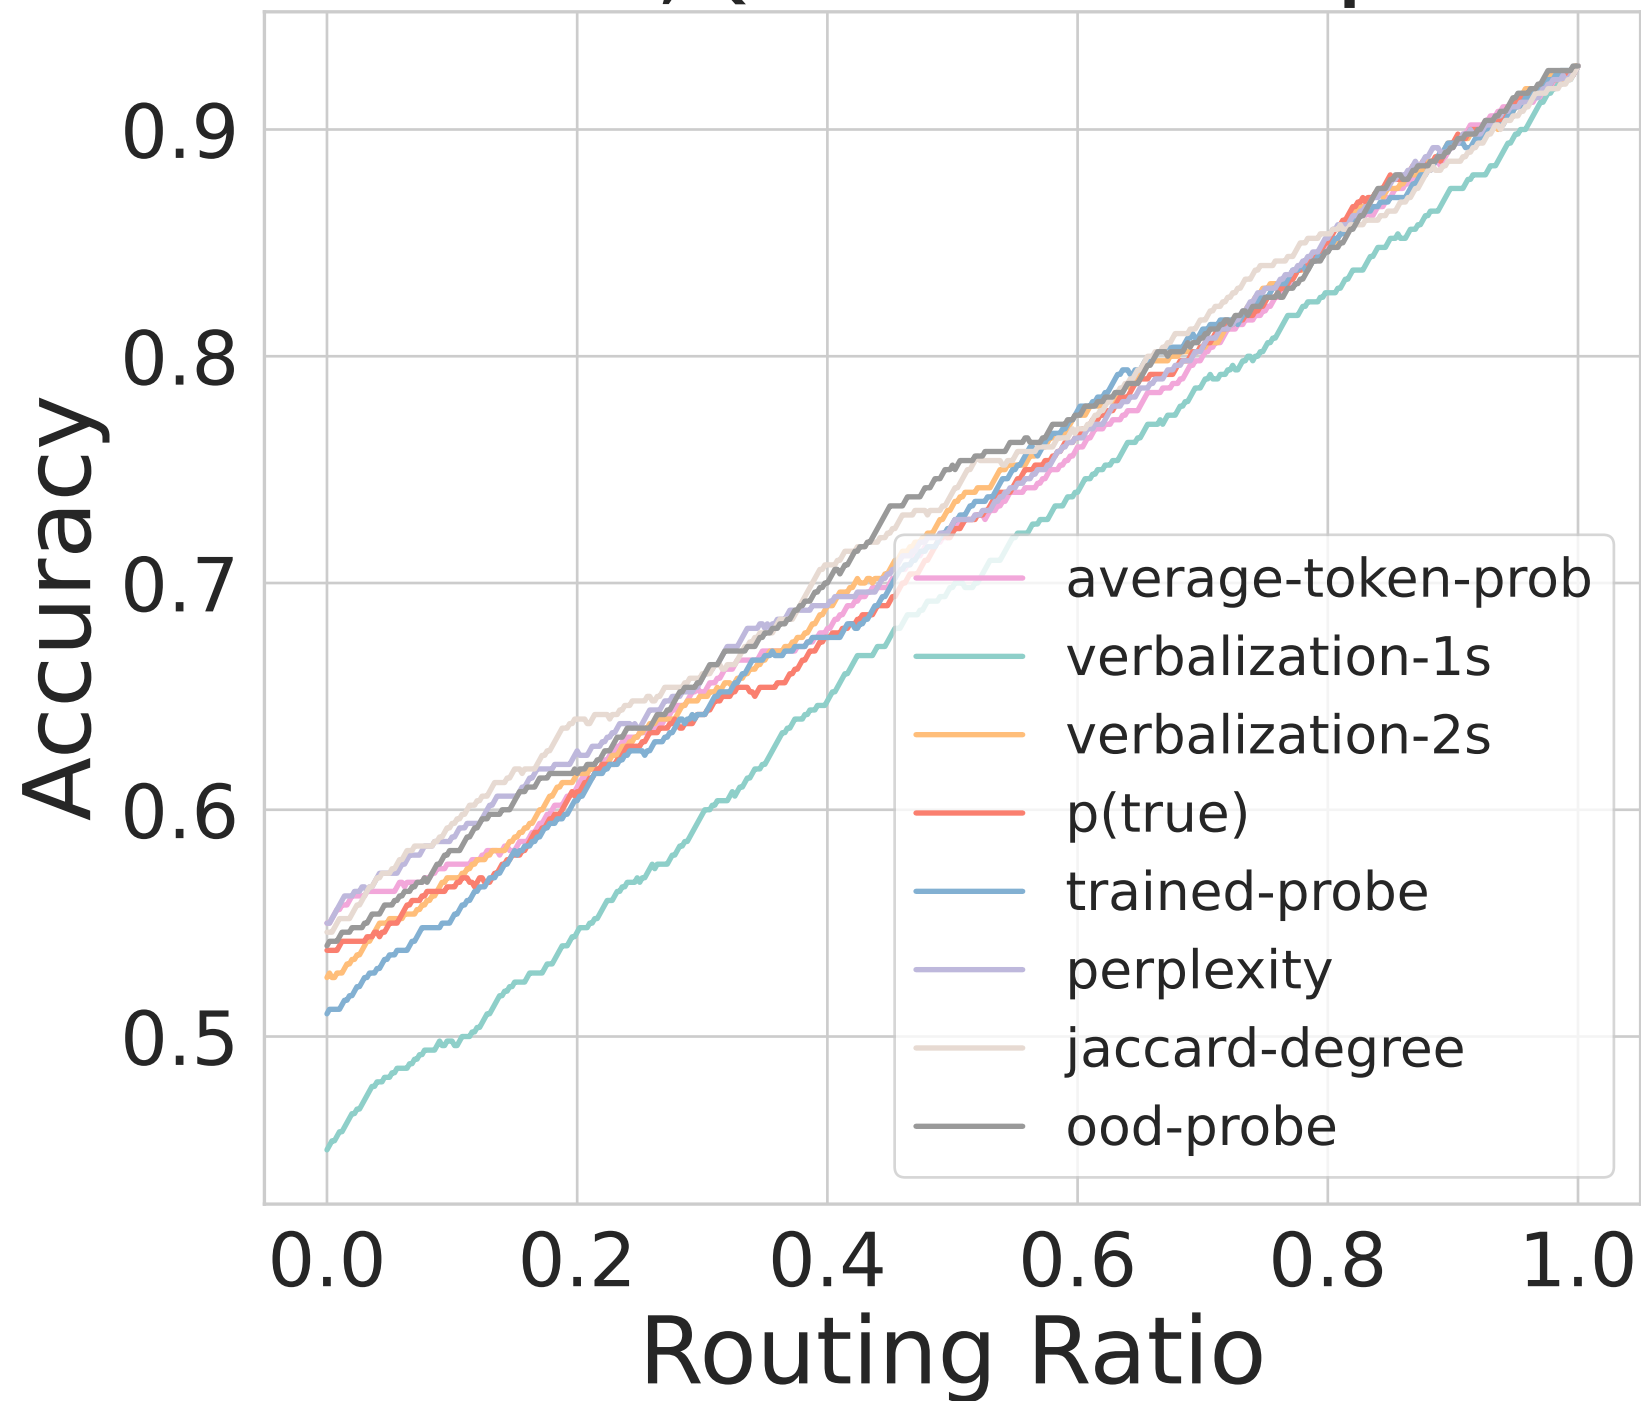

Supplement: supplementary_material [file rr_acc_winogrande_Qwen3-0.6B_dsR1.pdf › Routing_SLM_LLMs/Uncertainty-based Routing/w_legend/to_dsR1/rr_acc_winogrande_Qwen3-0.6B_dsR1.pdf]

# WinoGrande, Qwen3-4B to DeepSeek-R1

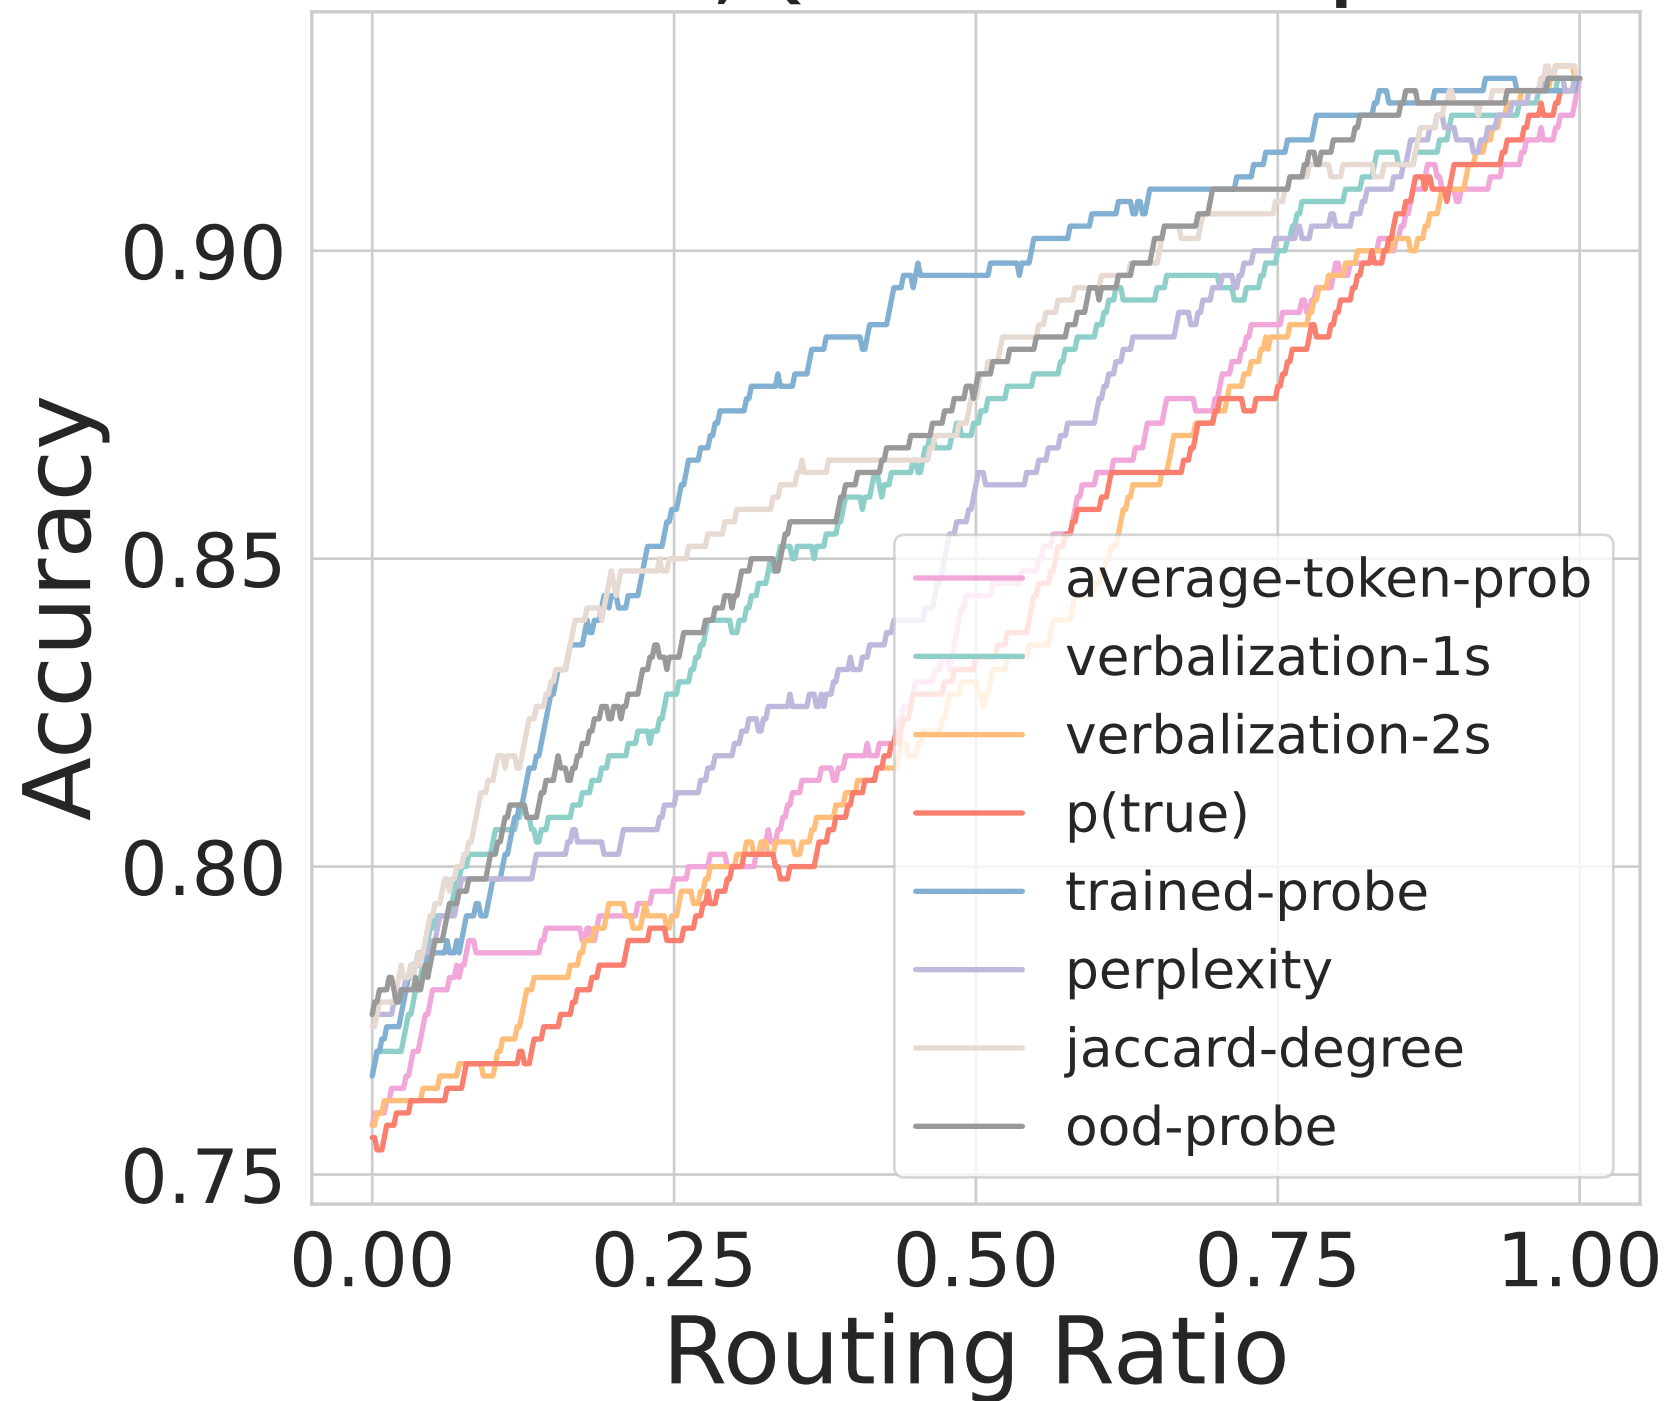

Supplement: supplementary_material [file rr_acc_winogrande_Qwen3-4B_dsR1.pdf › Routing_SLM_LLMs/Uncertainty-based Routing/w_legend/to_dsR1/rr_acc_winogrande_Qwen3-4B_dsR1.pdf]

# WinoGrande, granite-3.1-8b to DeepSeek-R1

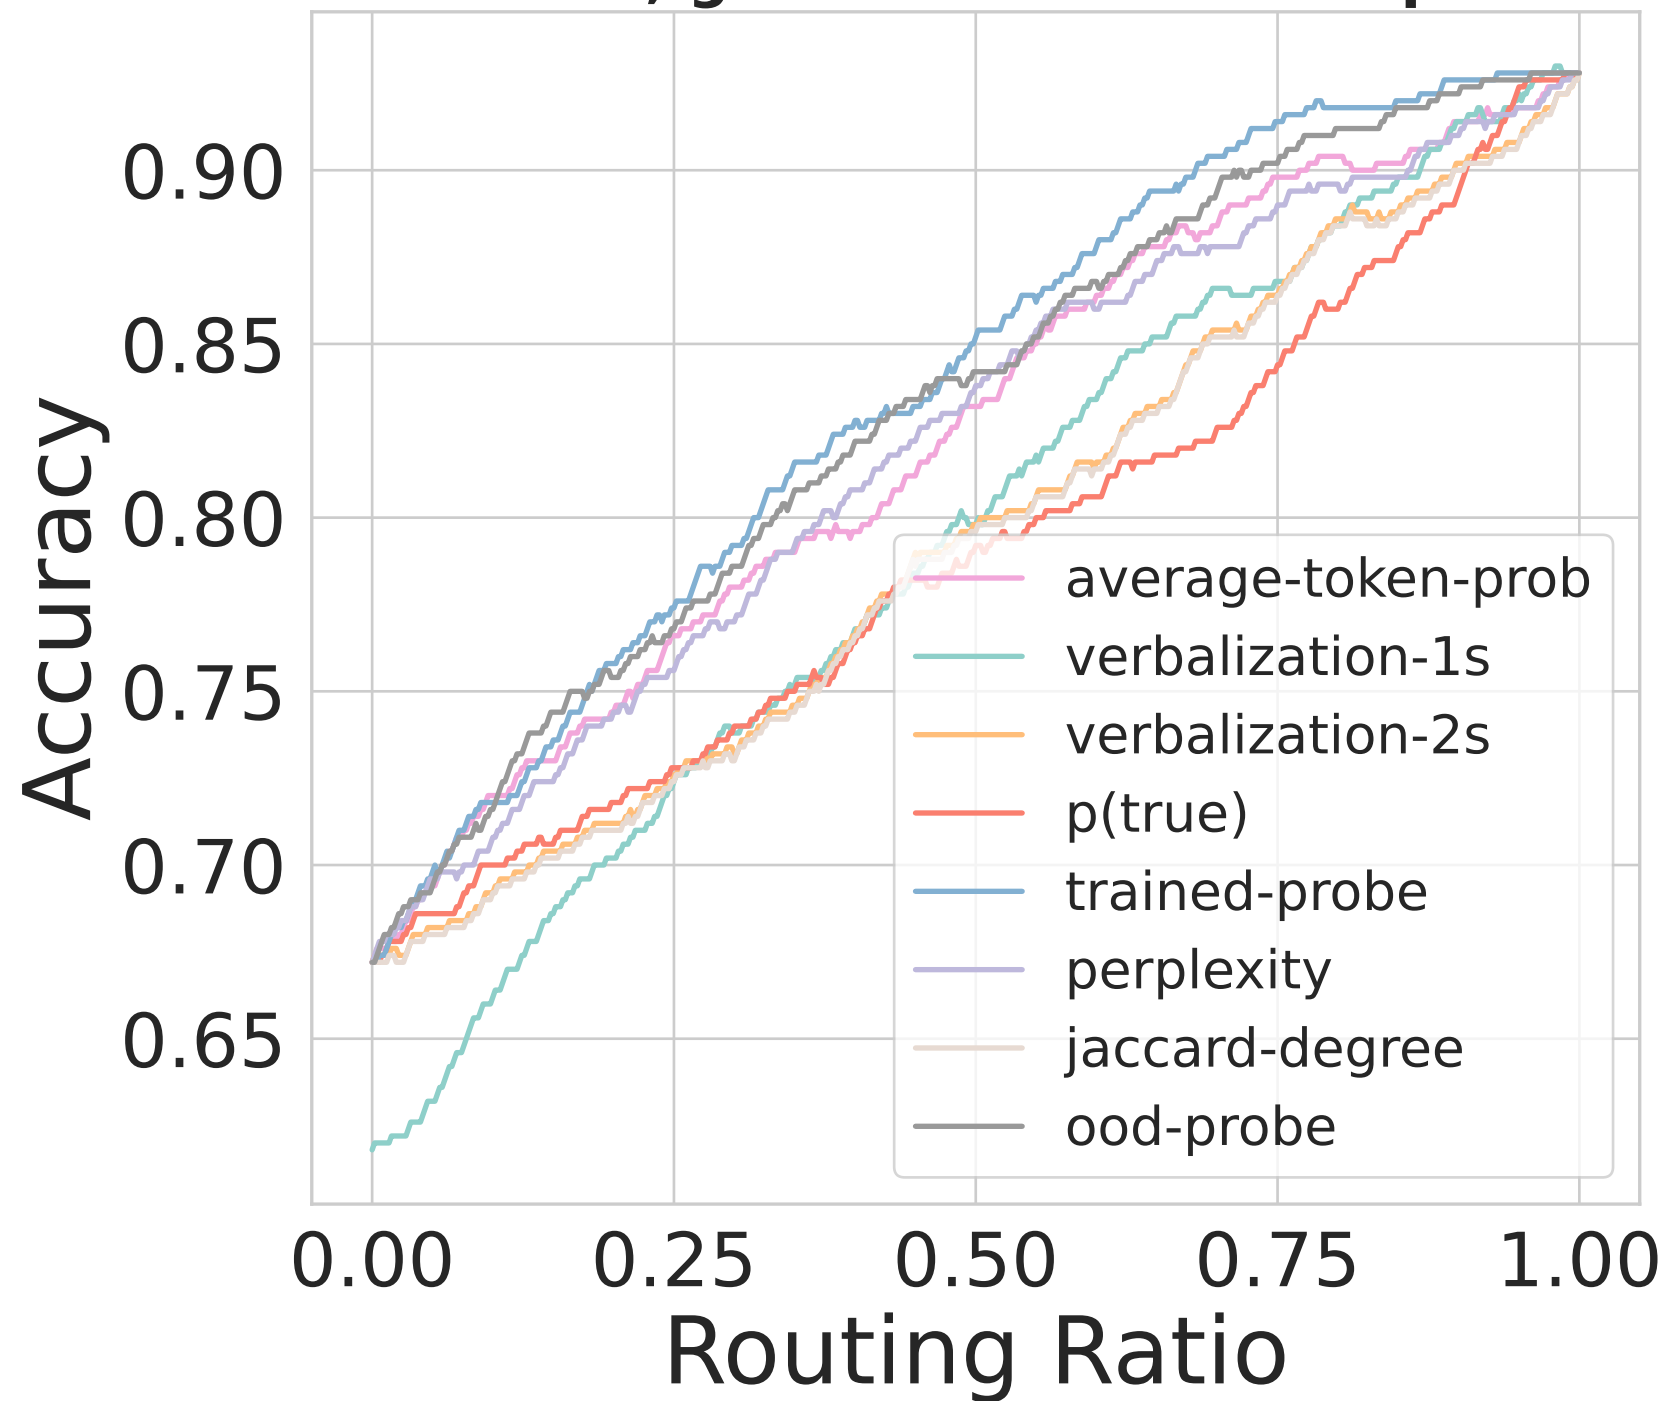

Supplement: supplementary_material [file rr_acc_winogrande_granite-3.1-8b_dsR1.pdf › Routing_SLM_LLMs/Uncertainty-based Routing/w_legend/to_dsR1/rr_acc_winogrande_granite-3.1-8b_dsR1.pdf]

# WinoGrande, llama-3.1-8b to DeepSeek-R1

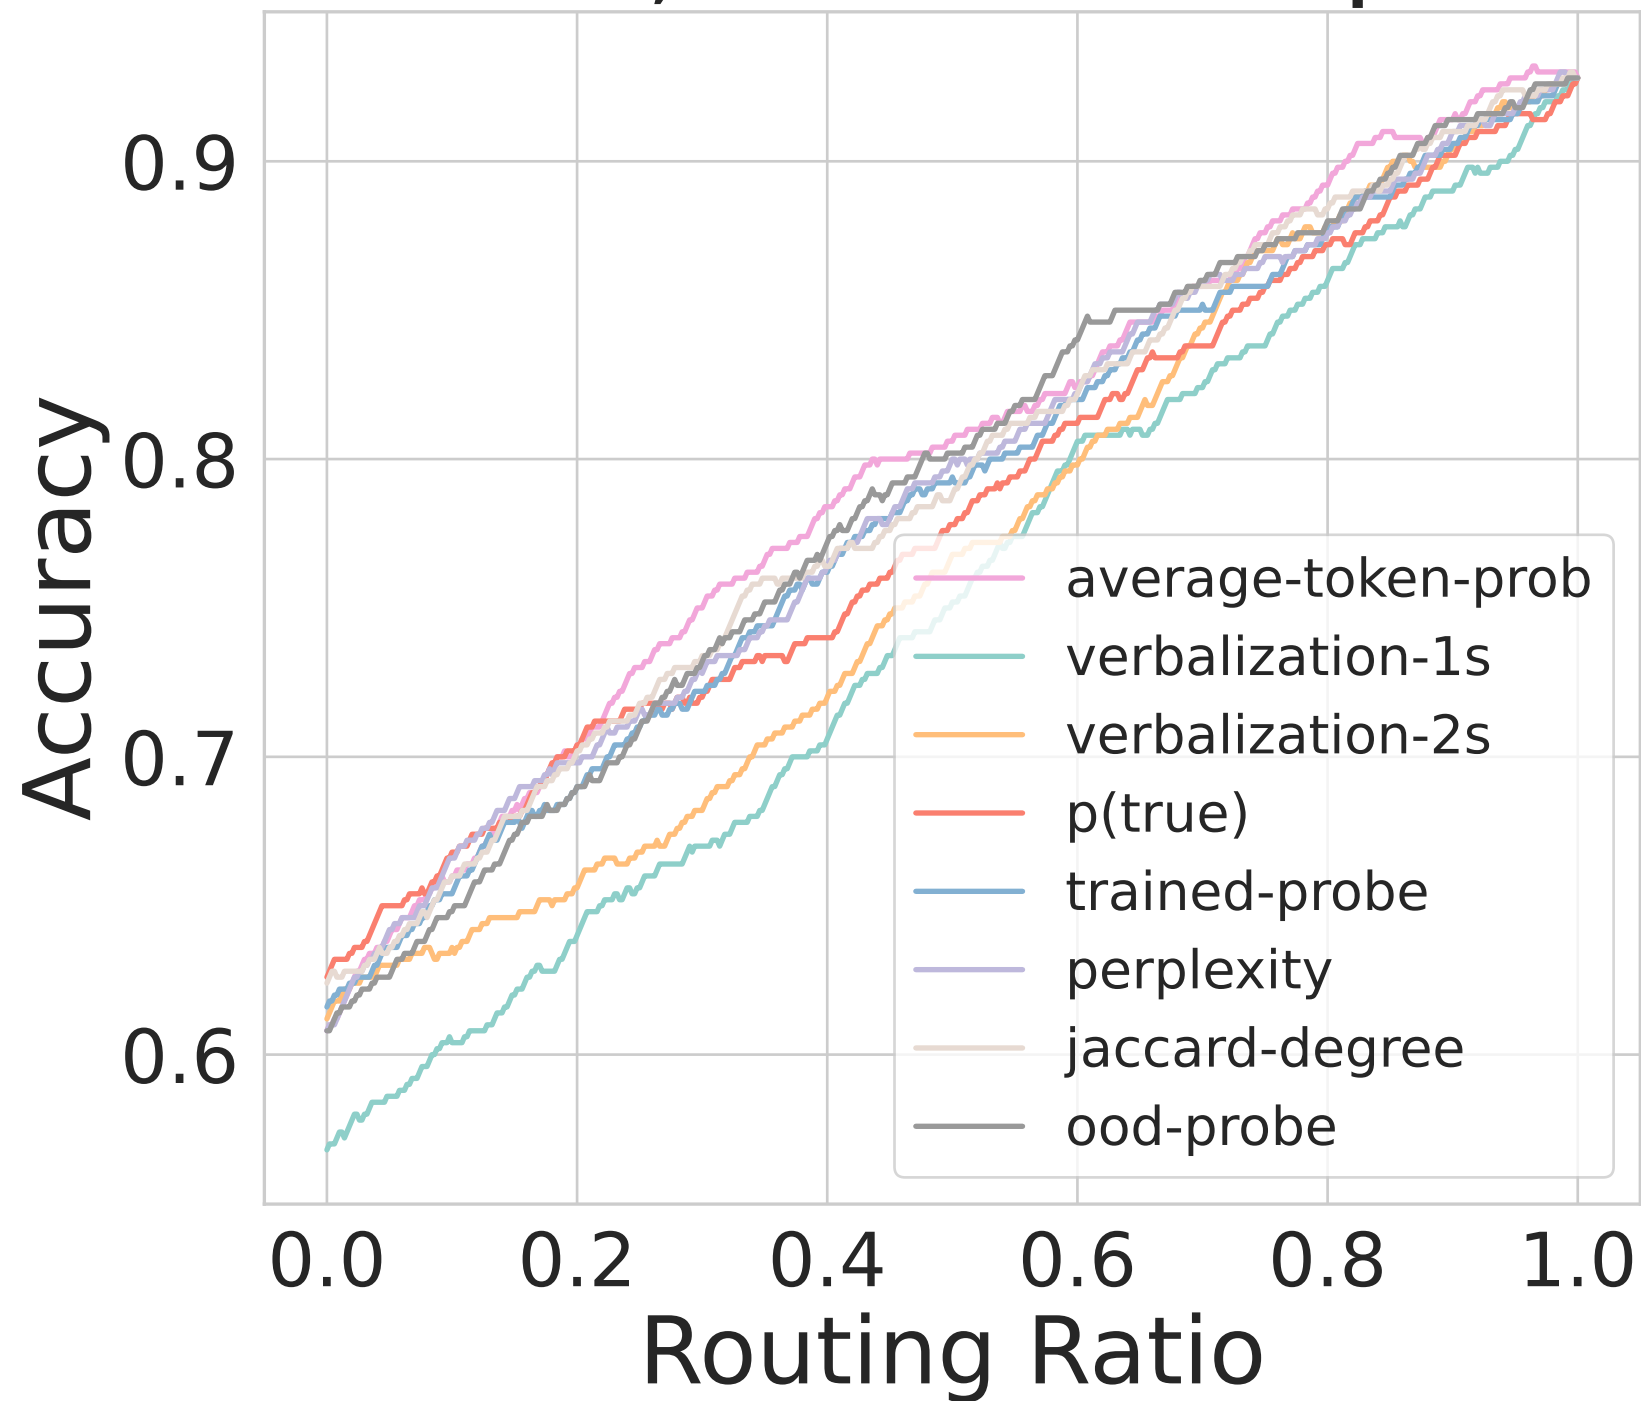

Supplement: supplementary_material [file rr_acc_winogrande_llama-3.1-8b_dsR1.pdf › Routing_SLM_LLMs/Uncertainty-based Routing/w_legend/to_dsR1/rr_acc_winogrande_llama-3.1-8b_dsR1.pdf]

# WinoGrande, llama-3.2-1b to DeepSeek-R1

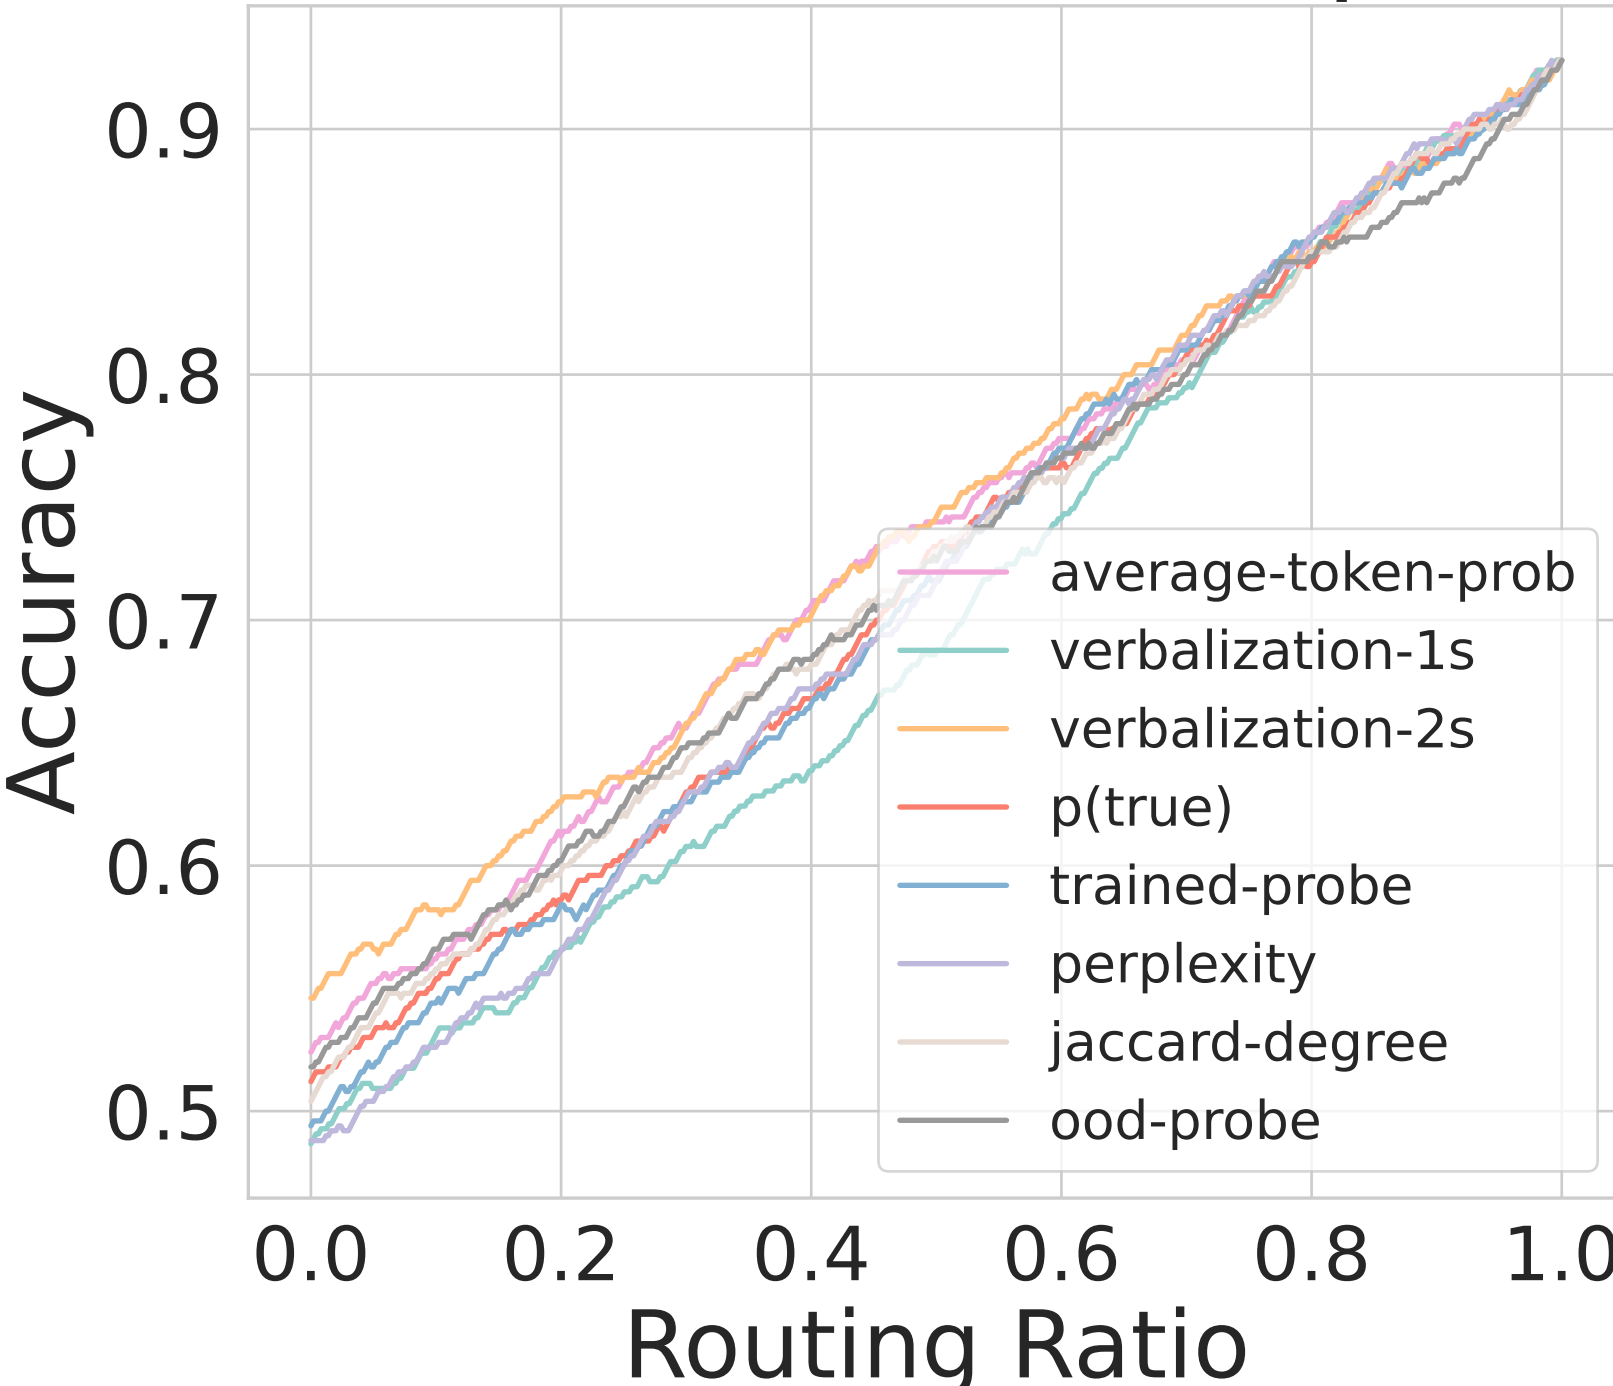

Supplement: supplementary_material [file rr_acc_winogrande_llama-3.2-1b_dsR1.pdf › Routing_SLM_LLMs/Uncertainty-based Routing/w_legend/to_dsR1/rr_acc_winogrande_llama-3.2-1b_dsR1.pdf]

# WinoGrande, llama-3.2-3b to DeepSeek-R1

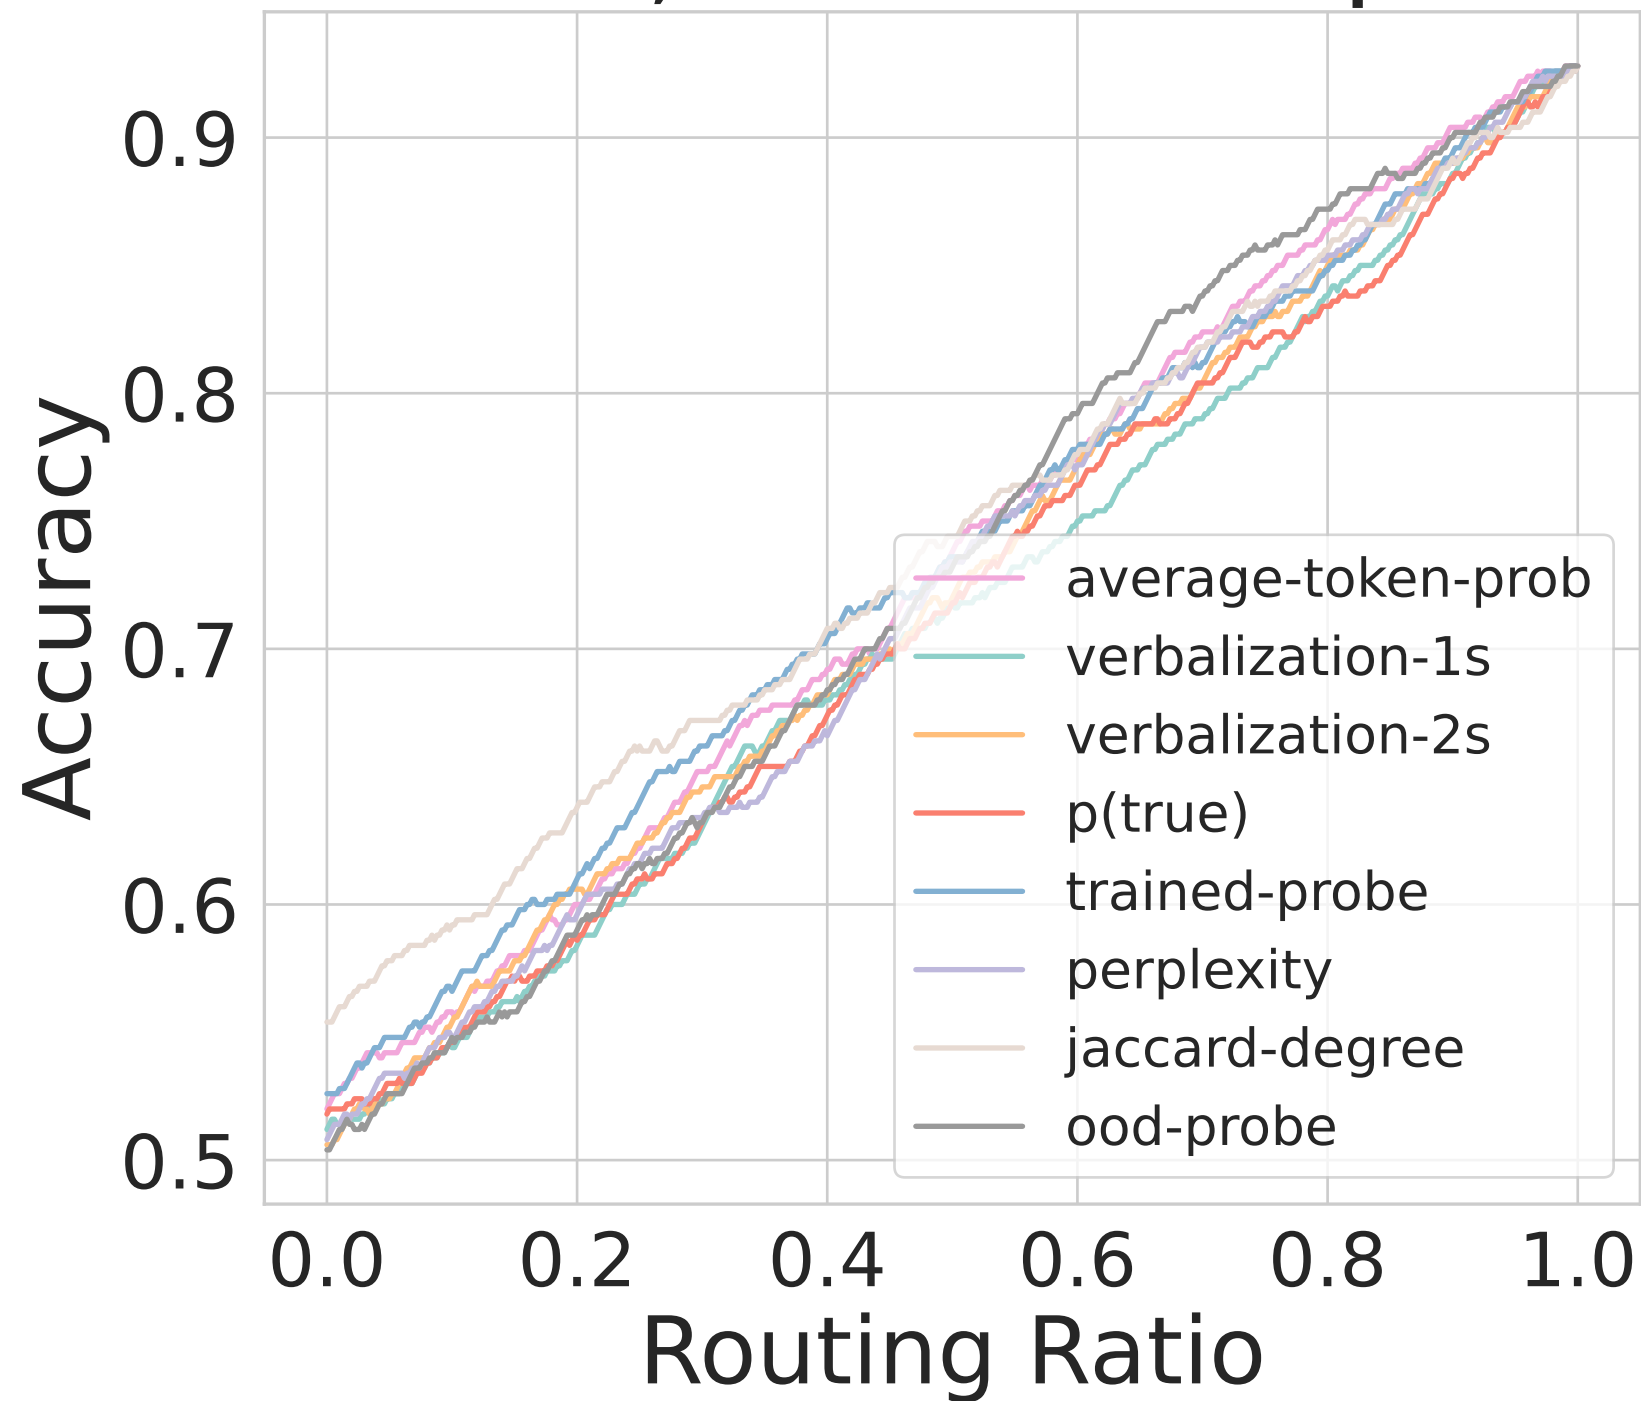

Supplement: supplementary_material [file rr_acc_winogrande_llama-3.2-3b_dsR1.pdf › Routing_SLM_LLMs/Uncertainty-based Routing/w_legend/to_dsR1/rr_acc_winogrande_llama-3.2-3b_dsR1.pdf]

# WinoGrande, mistral-7b to DeepSeek-R1

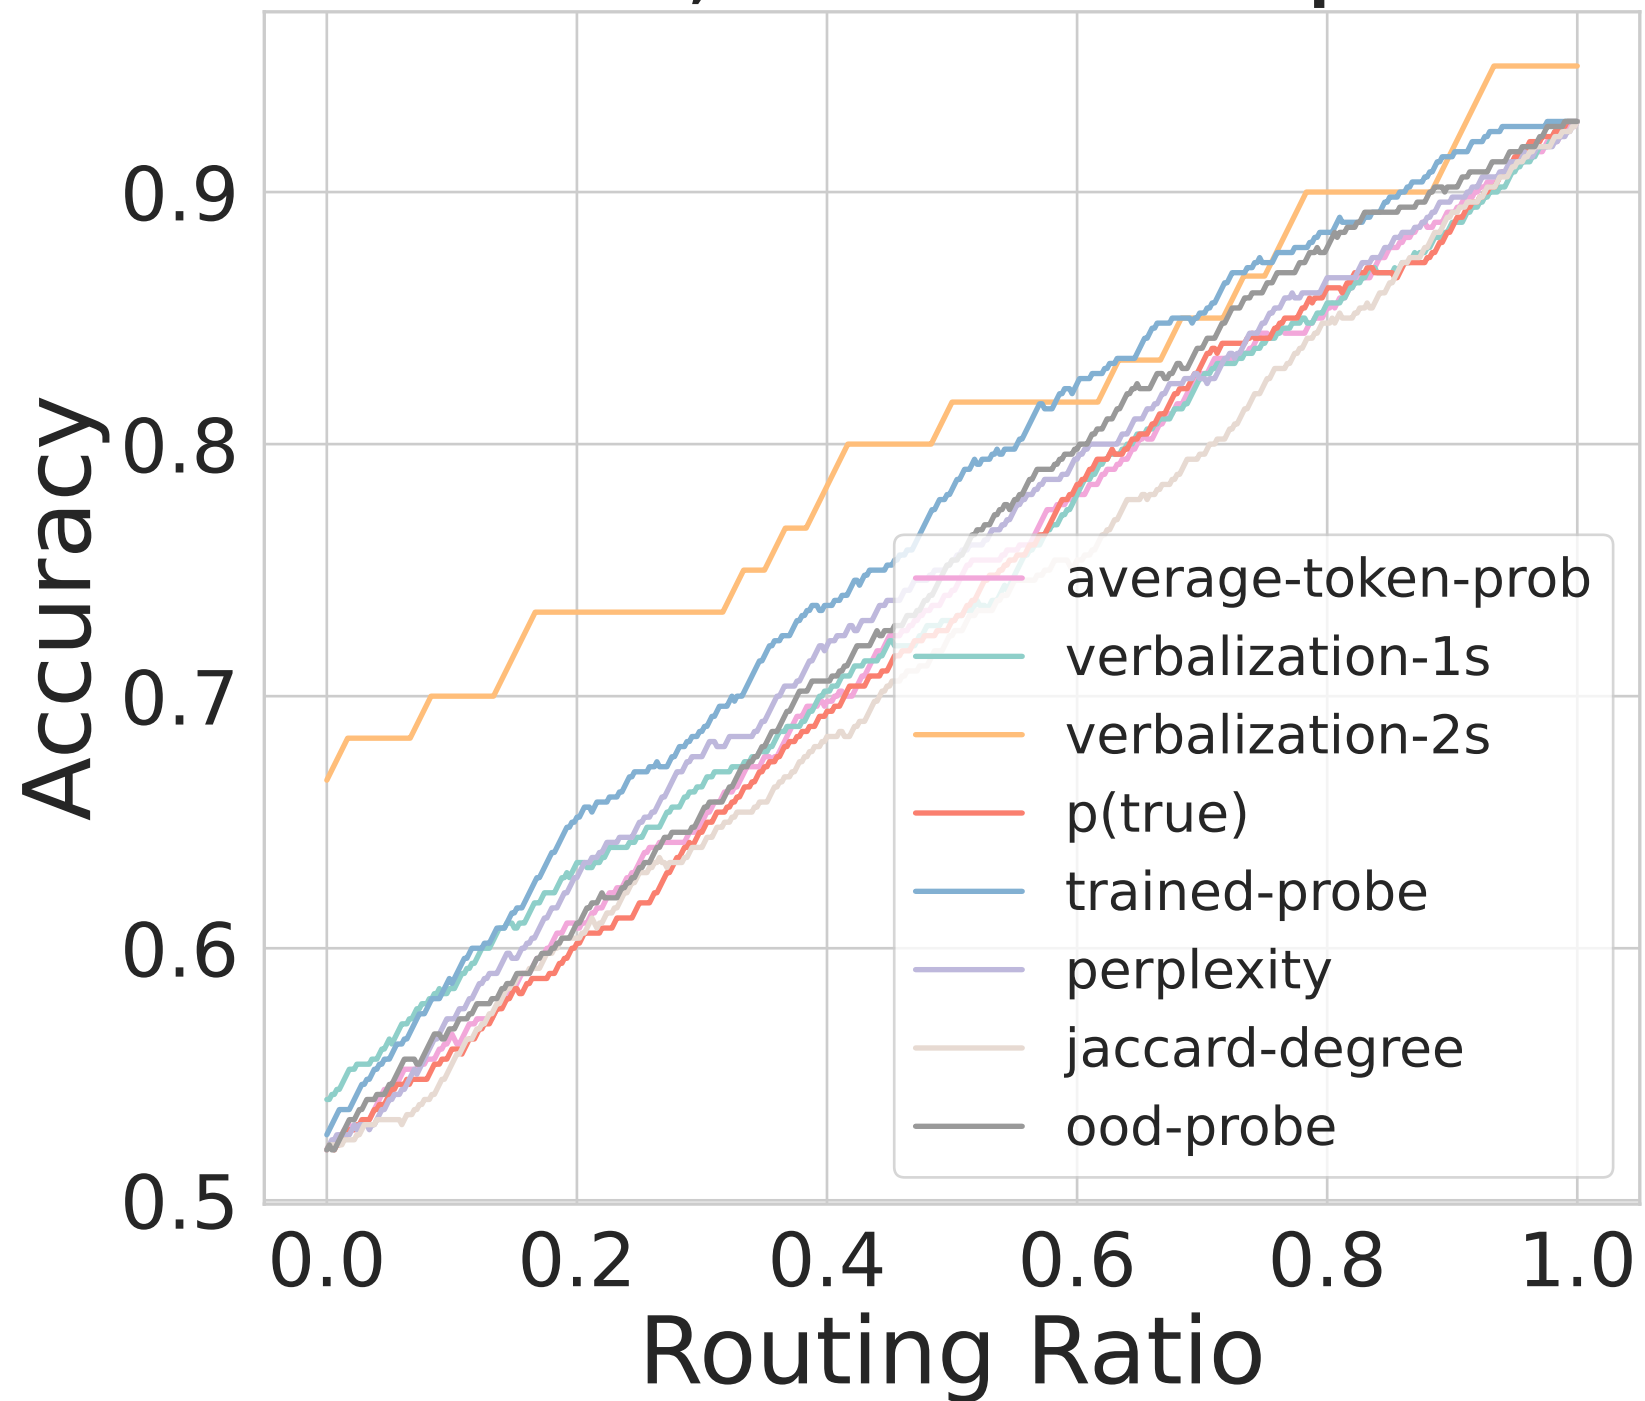

Supplement: supplementary_material [file rr_acc_winogrande_mistral-7b_dsR1.pdf › Routing_SLM_LLMs/Uncertainty-based Routing/w_legend/to_dsR1/rr_acc_winogrande_mistral-7b_dsR1.pdf]

# WinoGrande, phi-3.5-mini to DeepSeek-R1

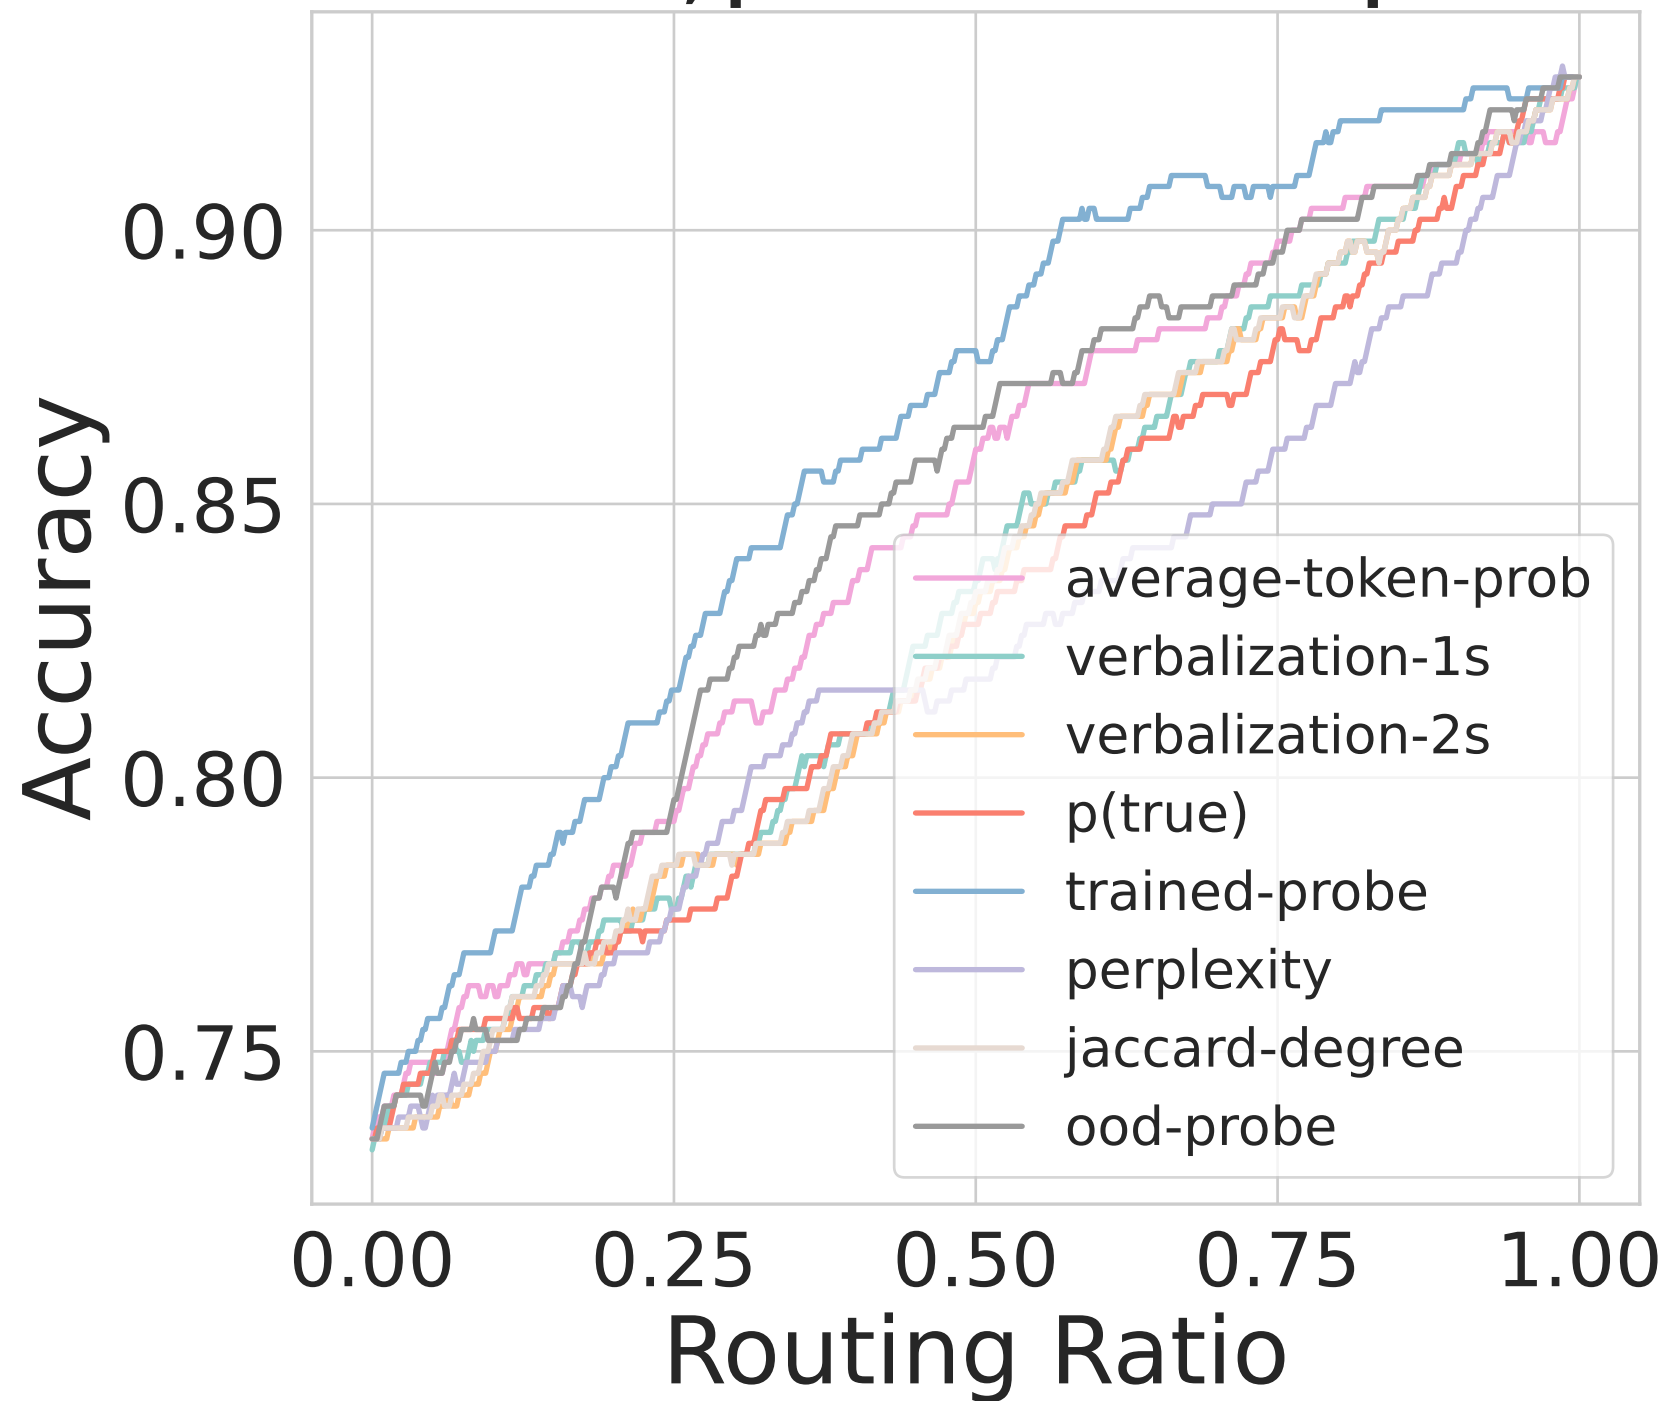

Supplement: supplementary_material [file rr_acc_winogrande_phi-3.5-mini_dsR1.pdf › Routing_SLM_LLMs/Uncertainty-based Routing/w_legend/to_dsR1/rr_acc_winogrande_phi-3.5-mini_dsR1.pdf]

# WinoGrande, phi-4-mini-reasoning to DeepSeek-R1

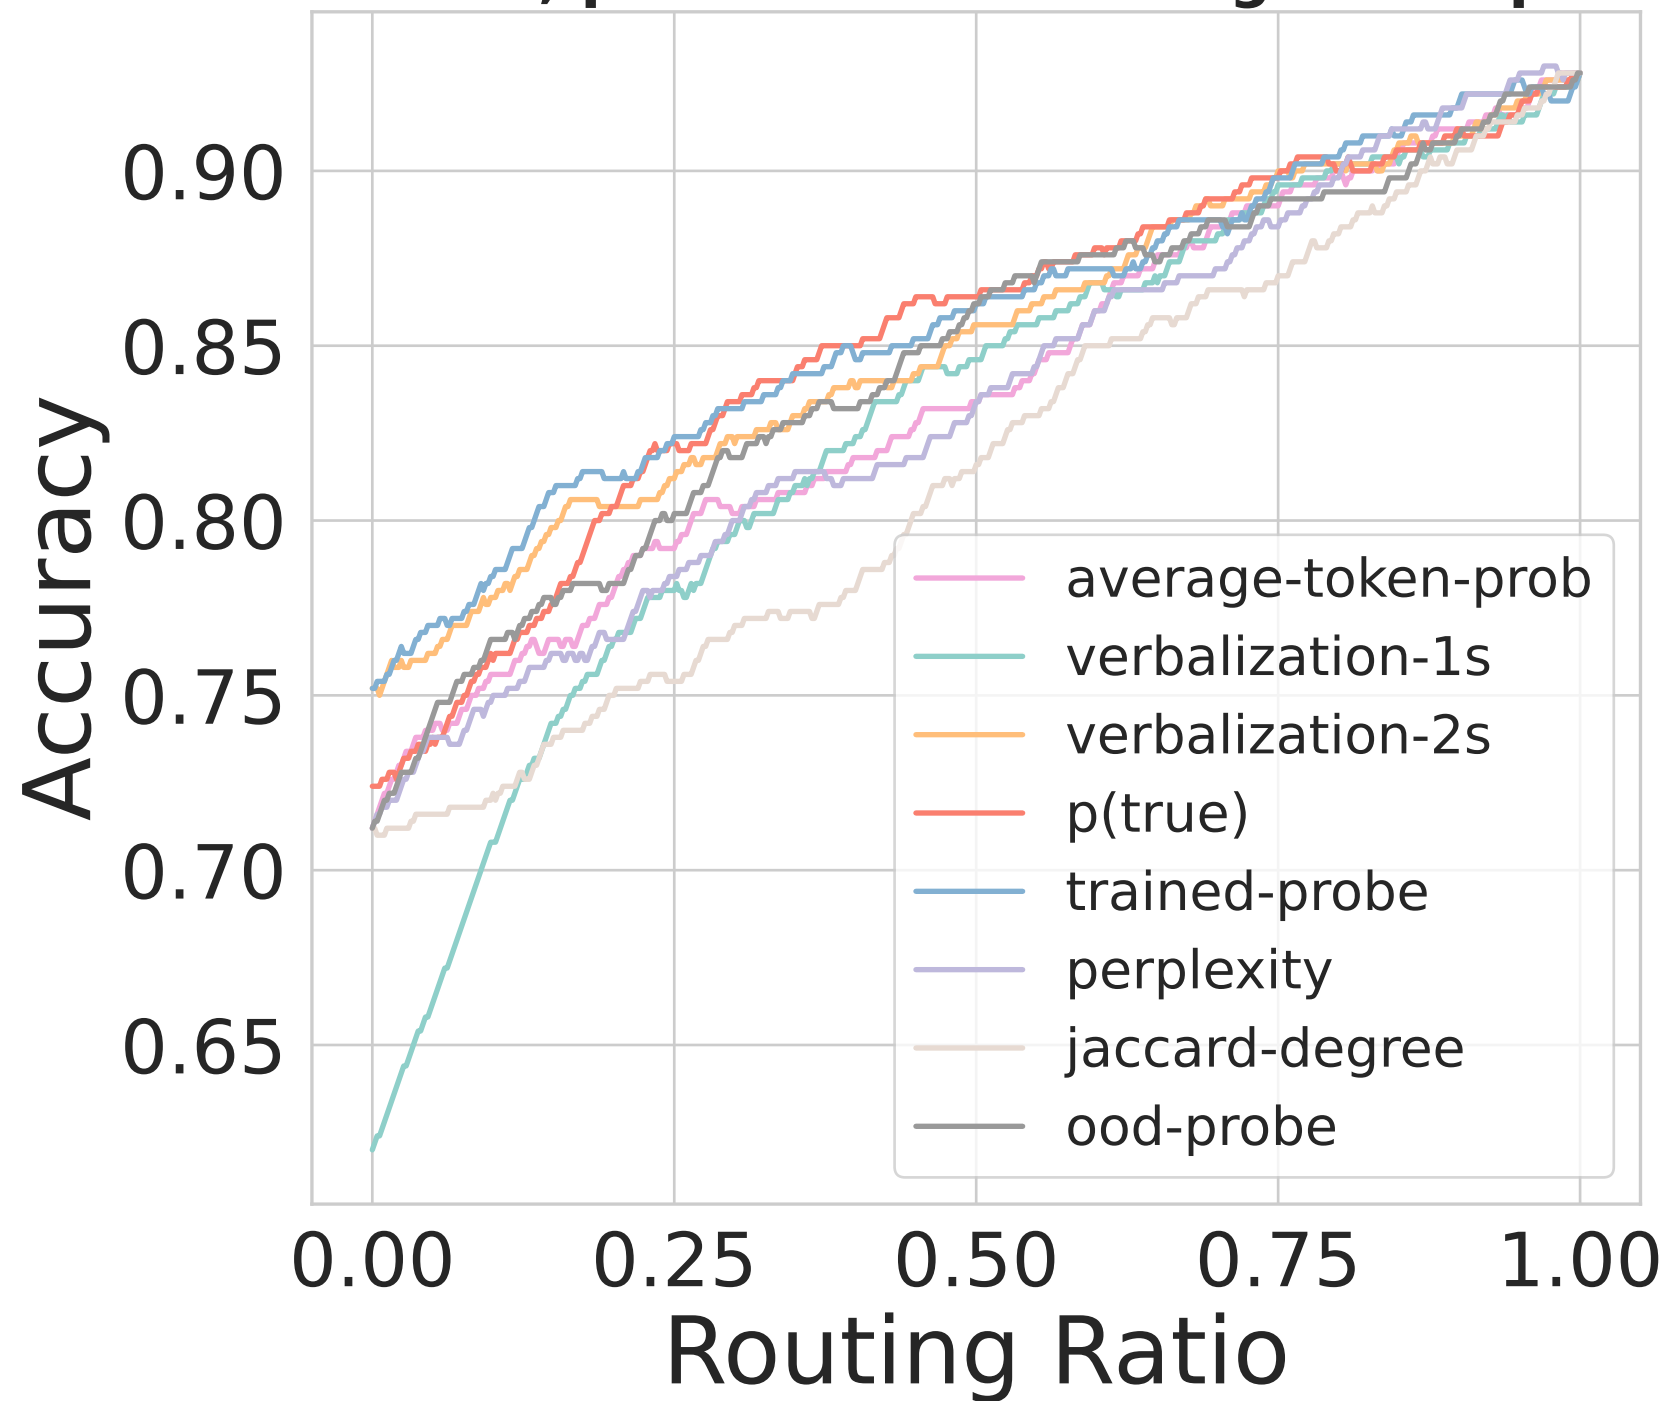

Supplement: supplementary_material [file rr_acc_winogrande_phi-4-mini-reasoning_dsR1.pdf › Routing_SLM_LLMs/Uncertainty-based Routing/w_legend/to_dsR1/rr_acc_winogrande_phi-4-mini-reasoning_dsR1.pdf]

# WinoGrande, rwkv to DeepSeek-R1

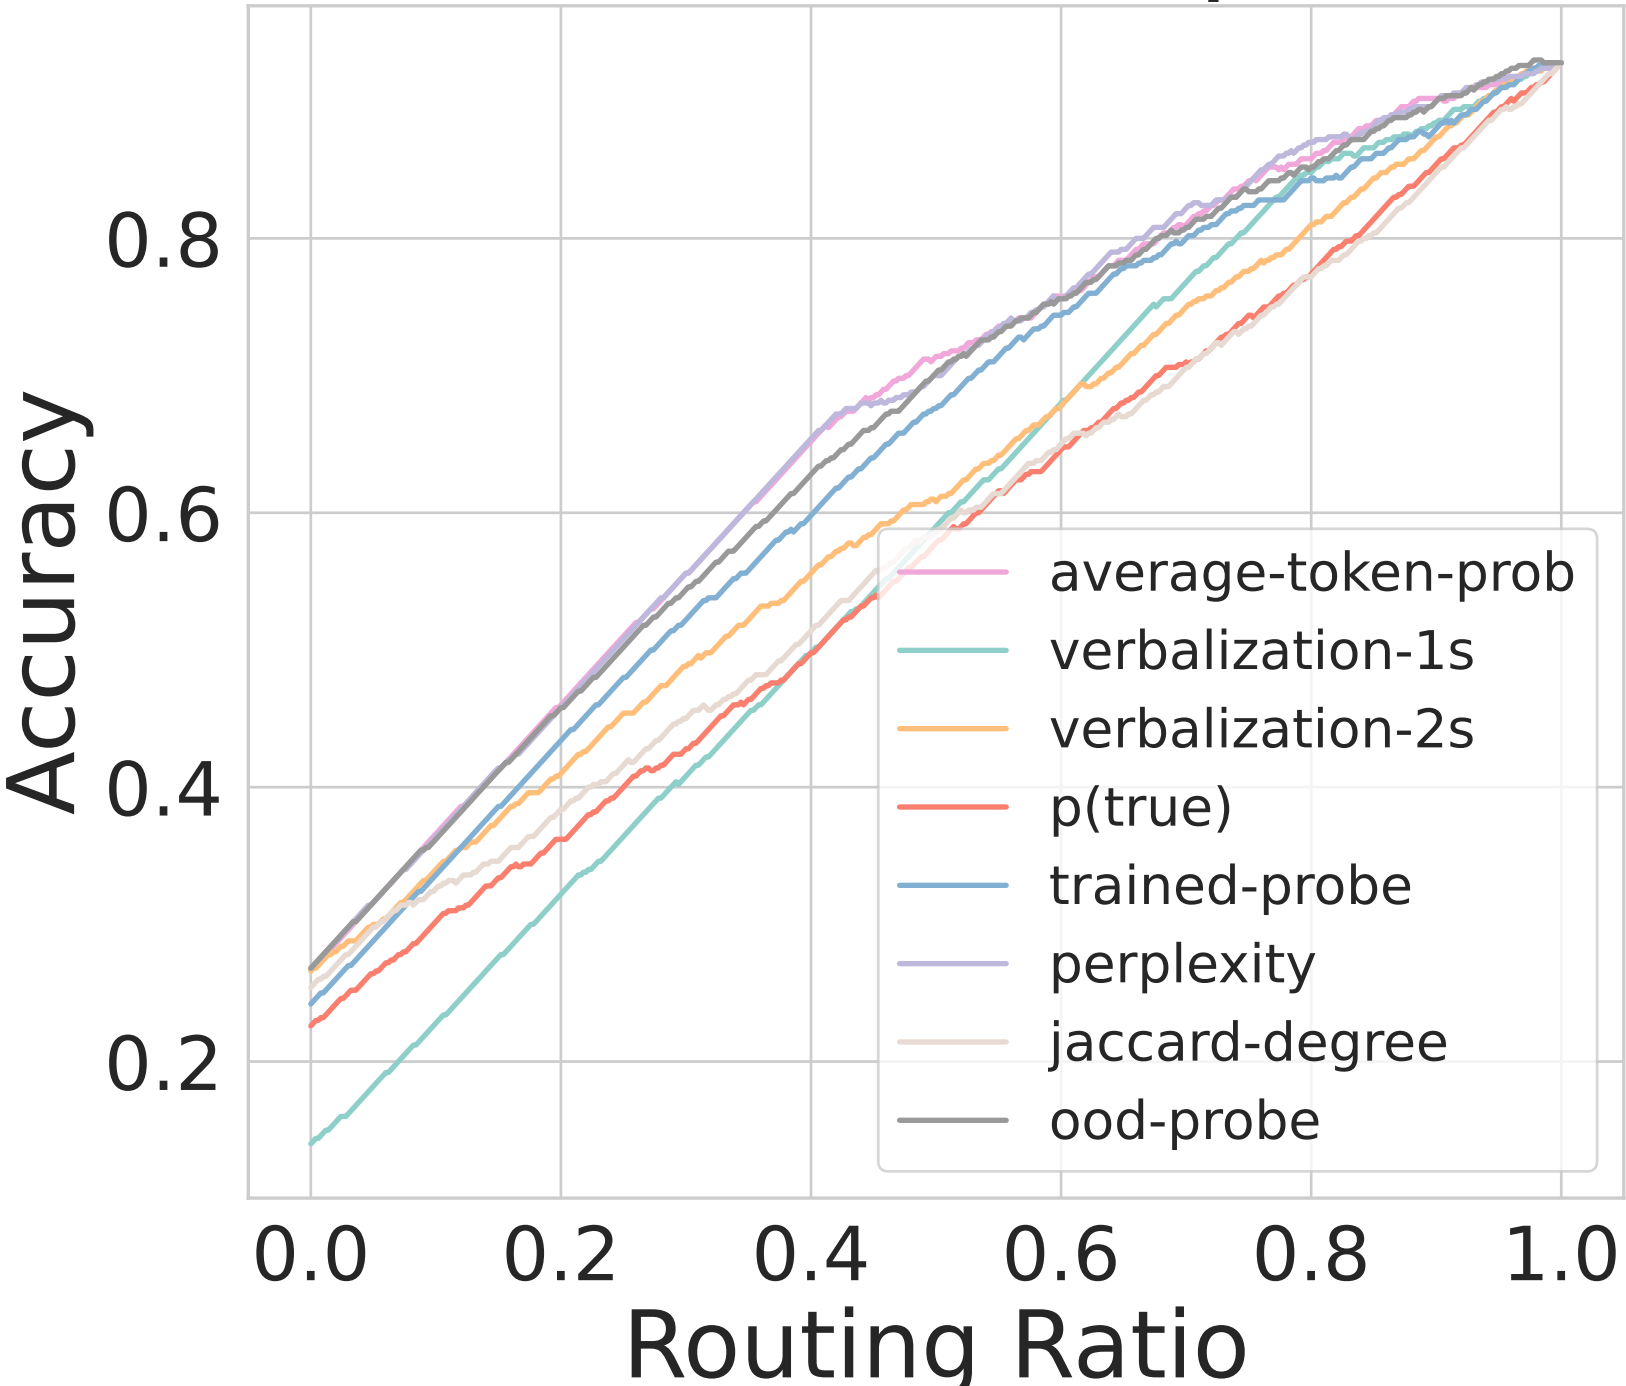

Supplement: supplementary_material [file rr_acc_winogrande_rwkv_dsR1.pdf › Routing_SLM_LLMs/Uncertainty-based Routing/w_legend/to_dsR1/rr_acc_winogrande_rwkv_dsR1.pdf]

## AQuA, Qwen3-0.6B to GPT-4.1 mini

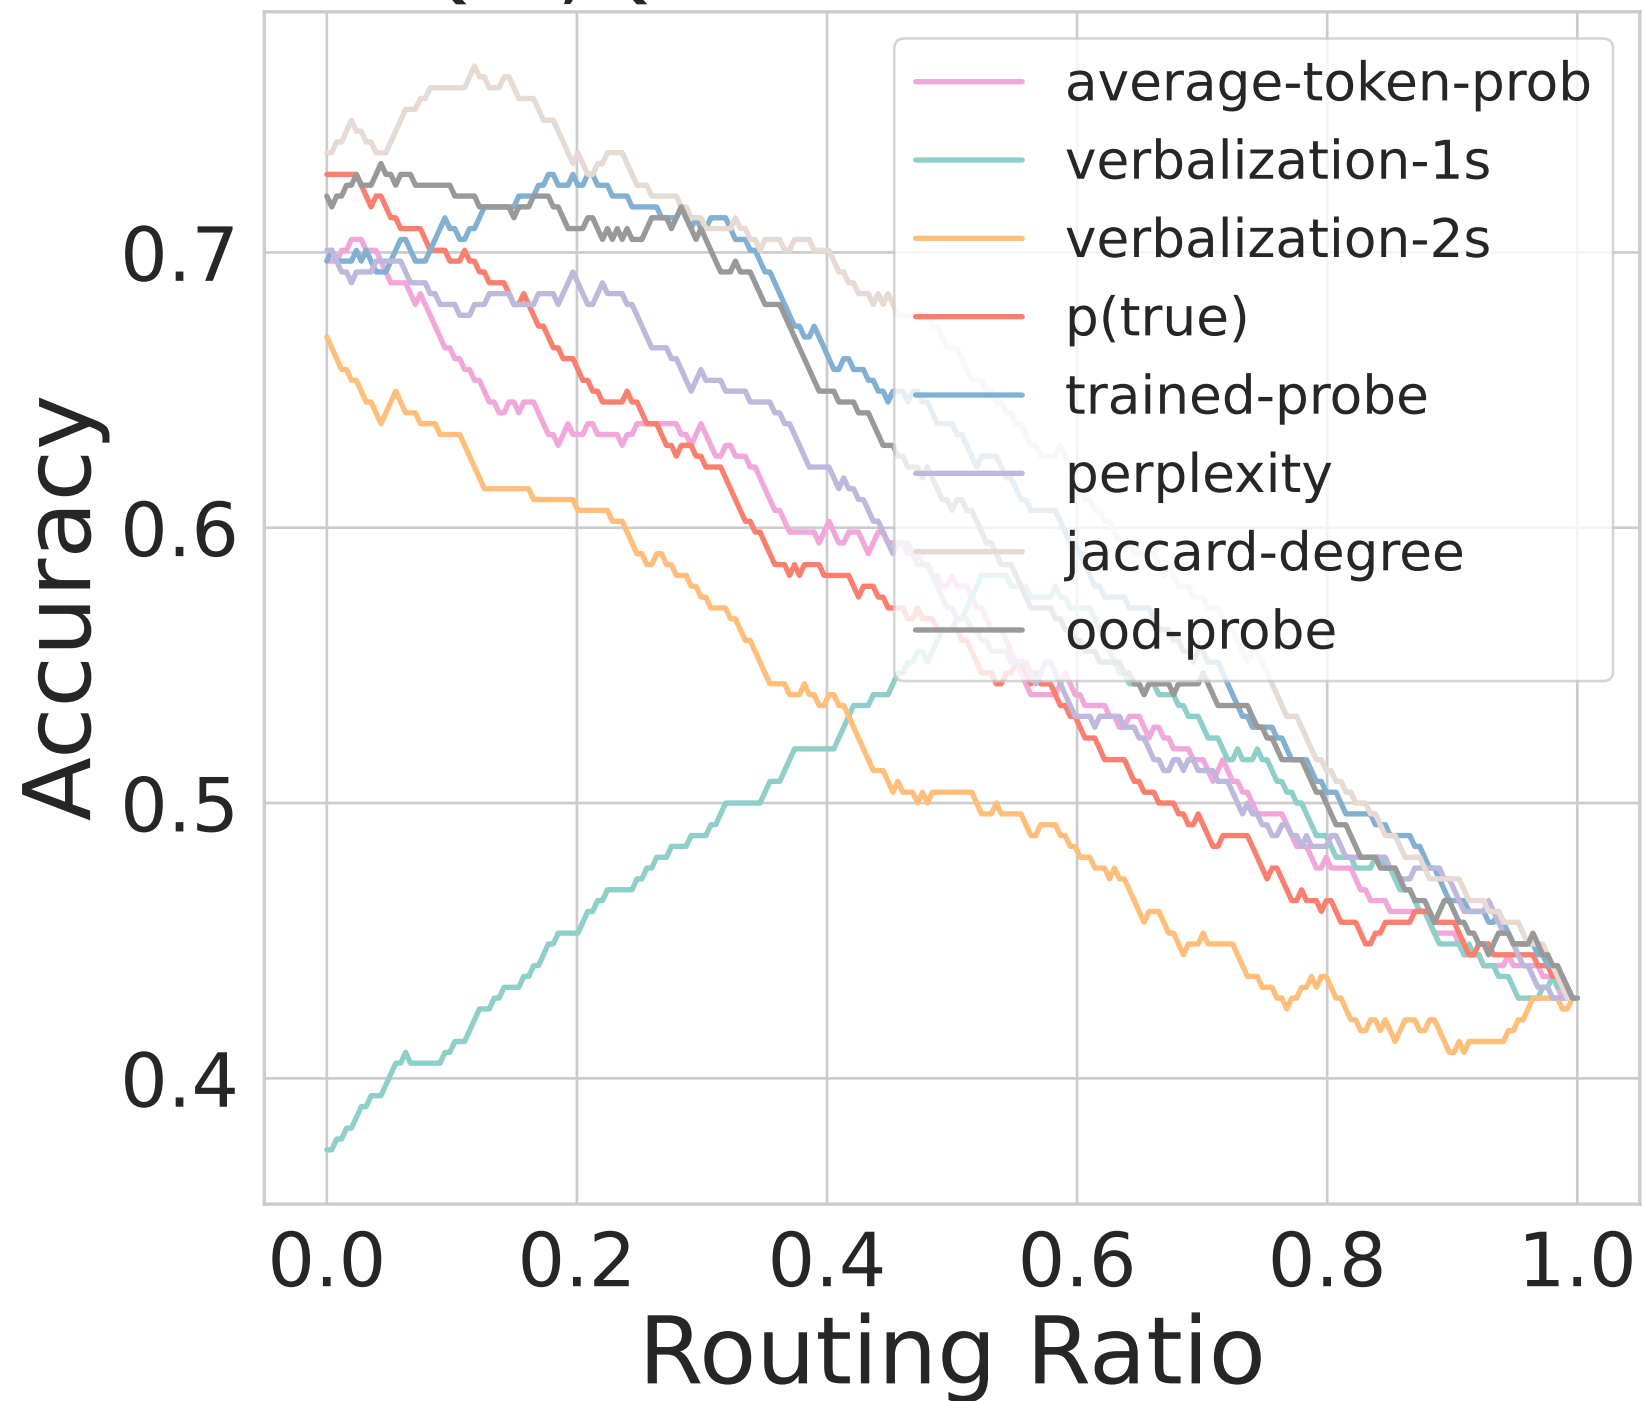

Supplement: supplementary_material [file rr_acc_aqua_Qwen3-0.6B_gpt41.pdf › Routing_SLM_LLMs/Uncertainty-based Routing/w_legend/to_gpt41/rr_acc_aqua_Qwen3-0.6B_gpt41.pdf]

## AQuA, Qwen3-4B to GPT-4.1 mini

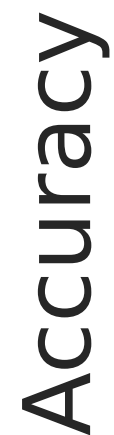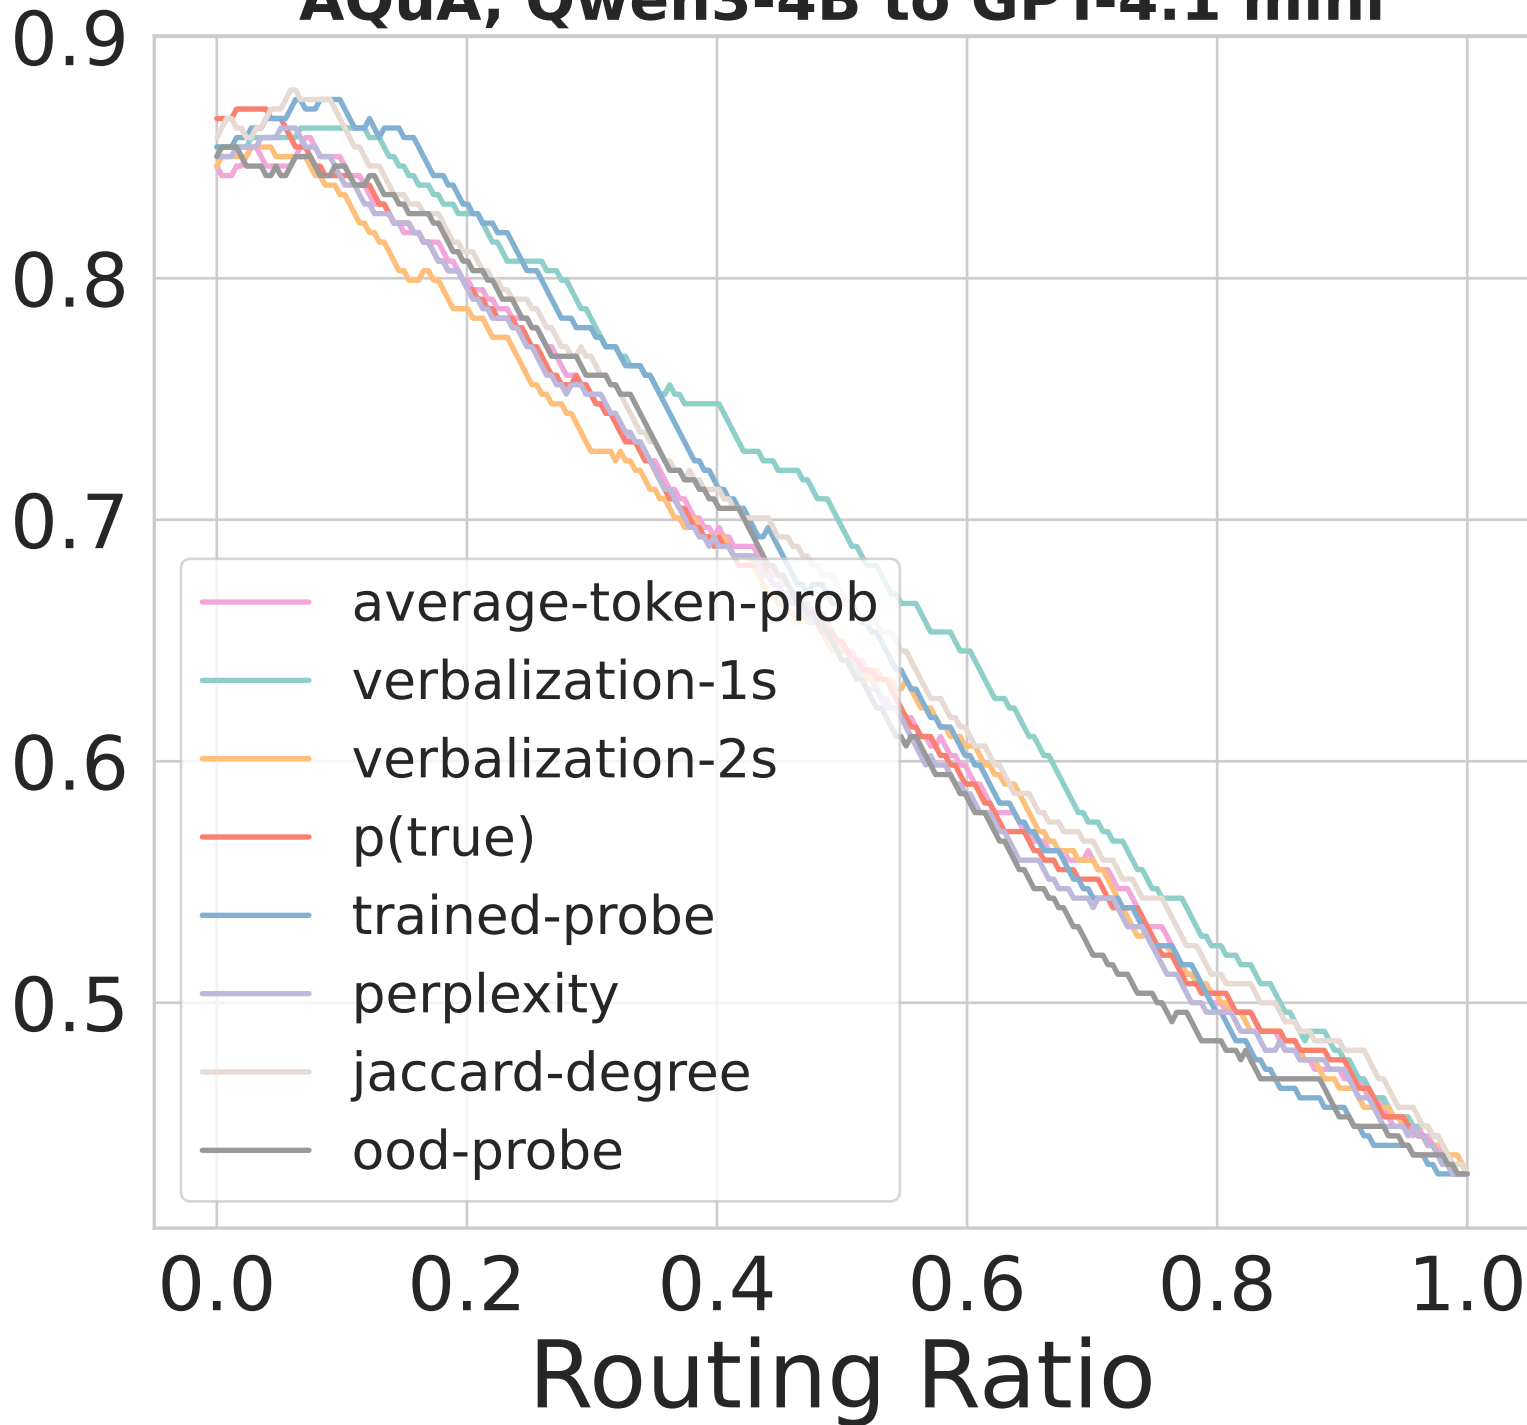

Supplement: supplementary_material [file rr_acc_aqua_Qwen3-4B_gpt41.pdf › Routing_SLM_LLMs/Uncertainty-based Routing/w_legend/to_gpt41/rr_acc_aqua_Qwen3-4B_gpt41.pdf]

## AQuA, granite-3.1-8b to GPT-4.1 mini

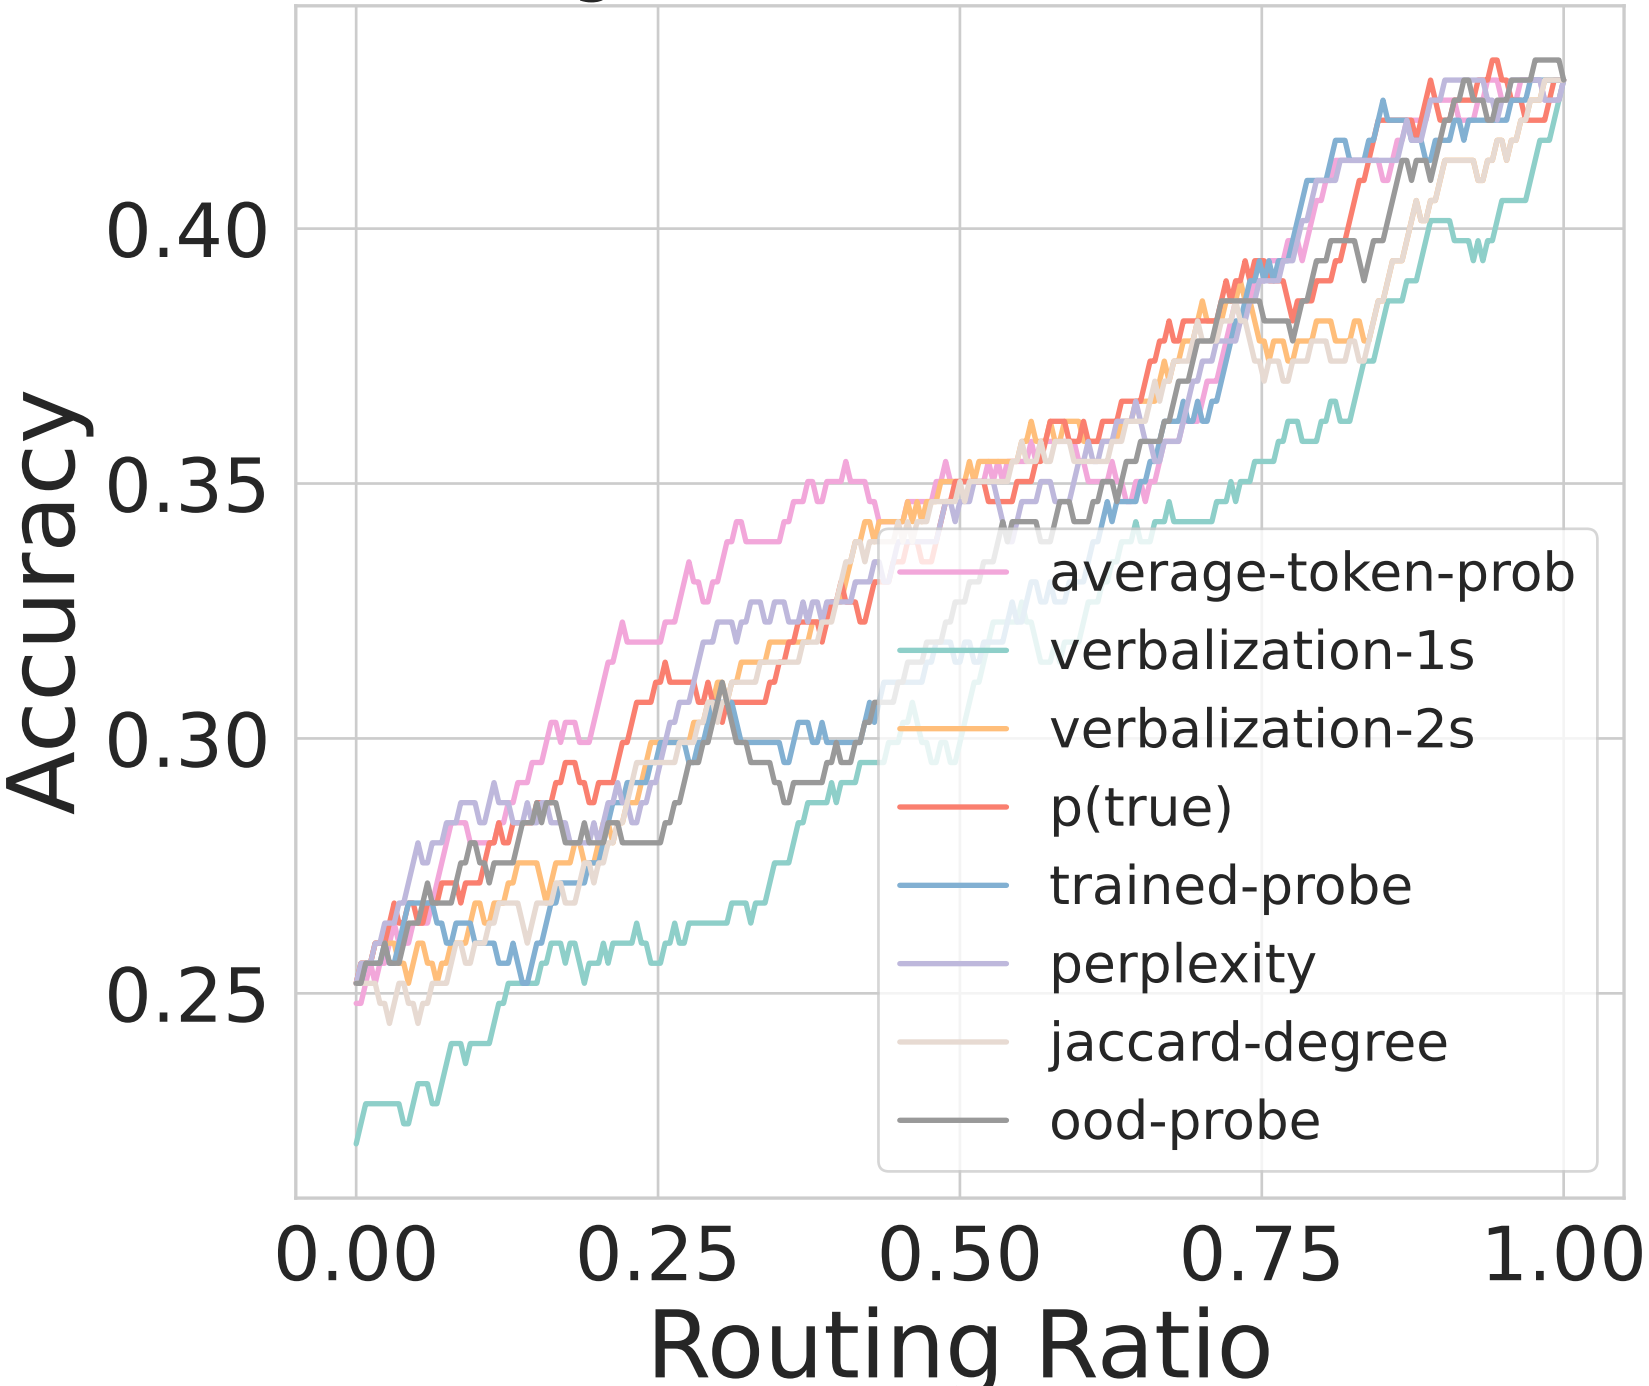

Supplement: supplementary_material [file rr_acc_aqua_granite-3.1-8b_gpt41.pdf › Routing_SLM_LLMs/Uncertainty-based Routing/w_legend/to_gpt41/rr_acc_aqua_granite-3.1-8b_gpt41.pdf]

**AQuA, llama-3.1-8b to GPT-4.1 mini**

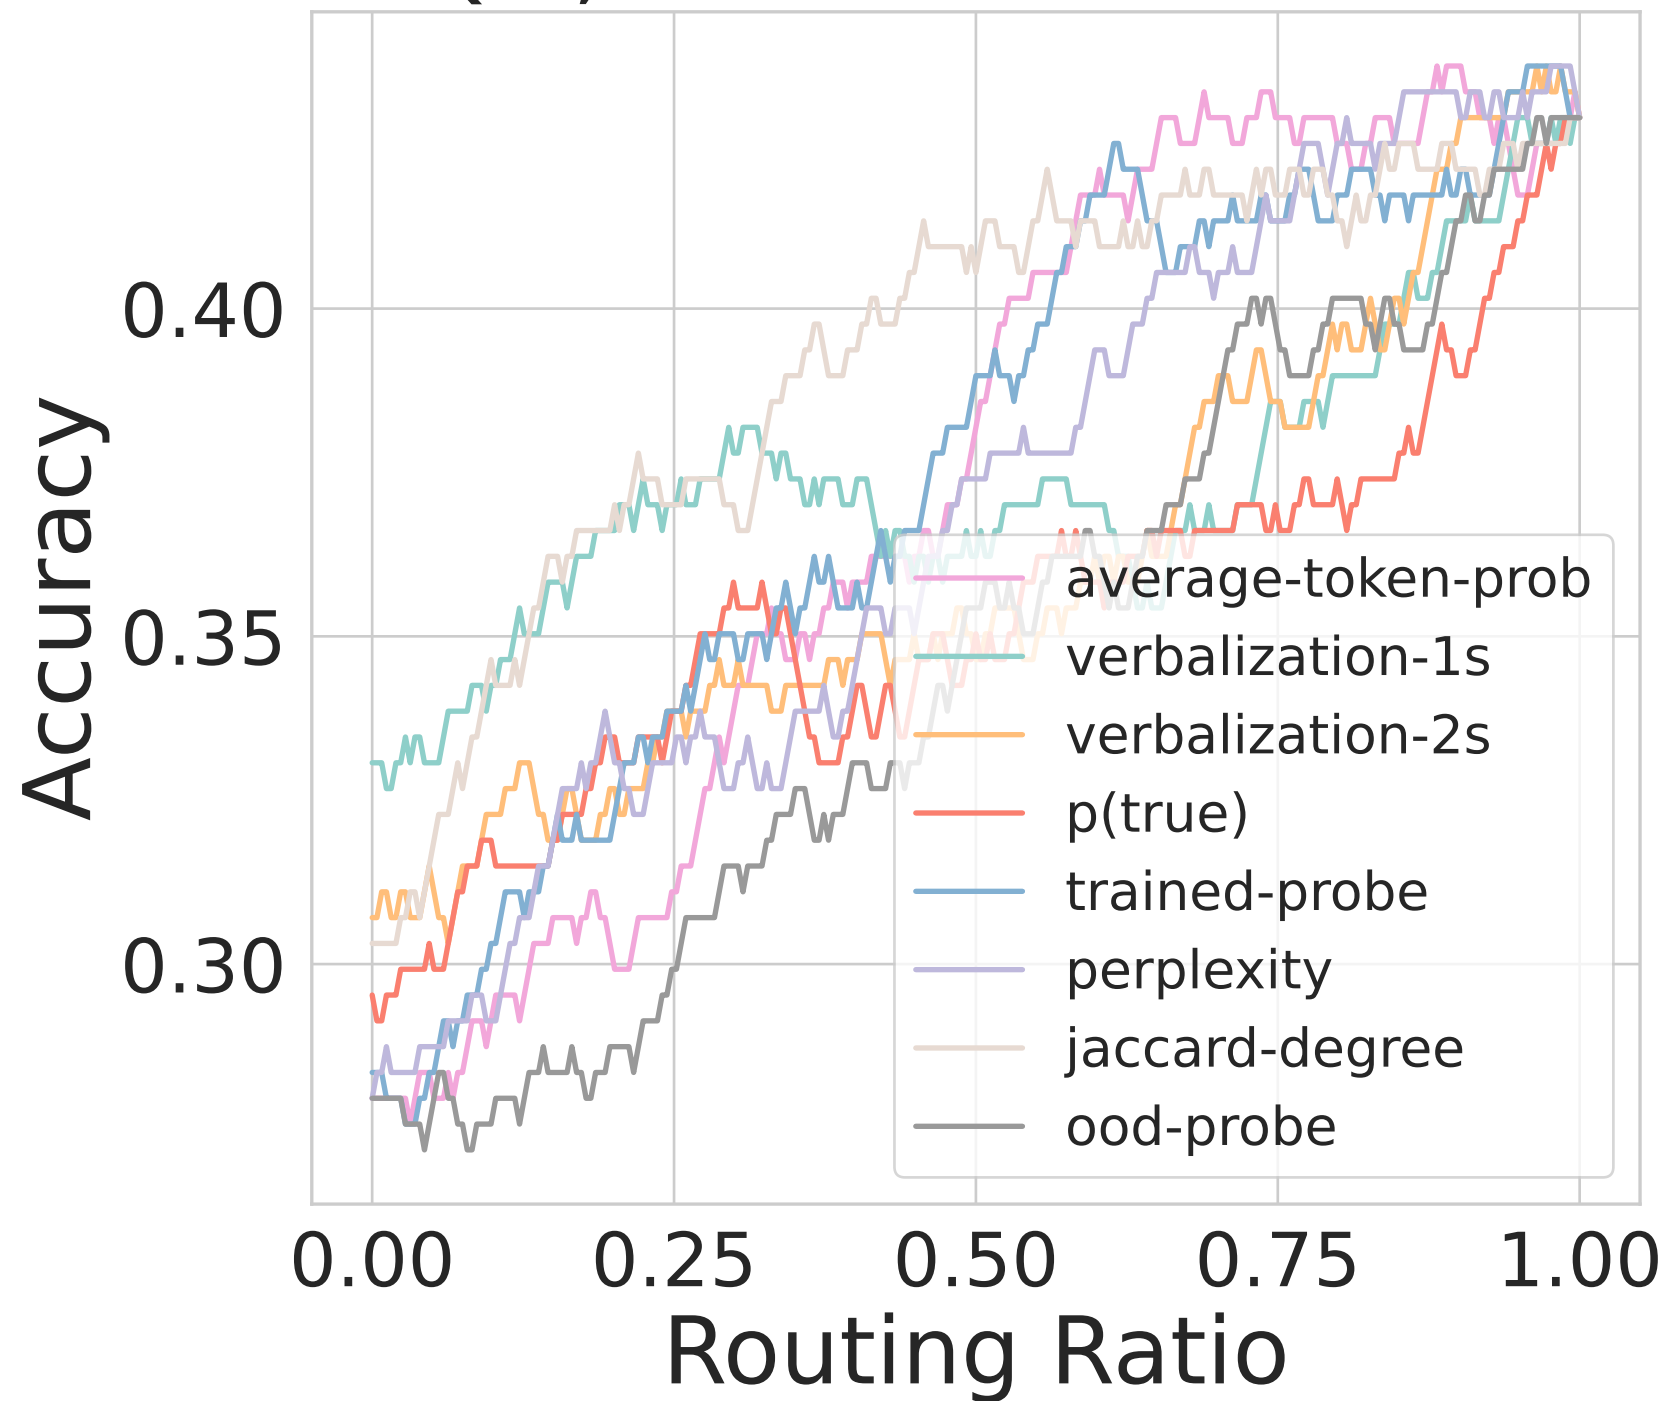

Supplement: supplementary_material [file rr_acc_aqua_llama-3.1-8b_gpt41.pdf › Routing_SLM_LLMs/Uncertainty-based Routing/w_legend/to_gpt41/rr_acc_aqua_llama-3.1-8b_gpt41.pdf]

**AQuA, llama-3.2-1b to GPT-4.1 mini**

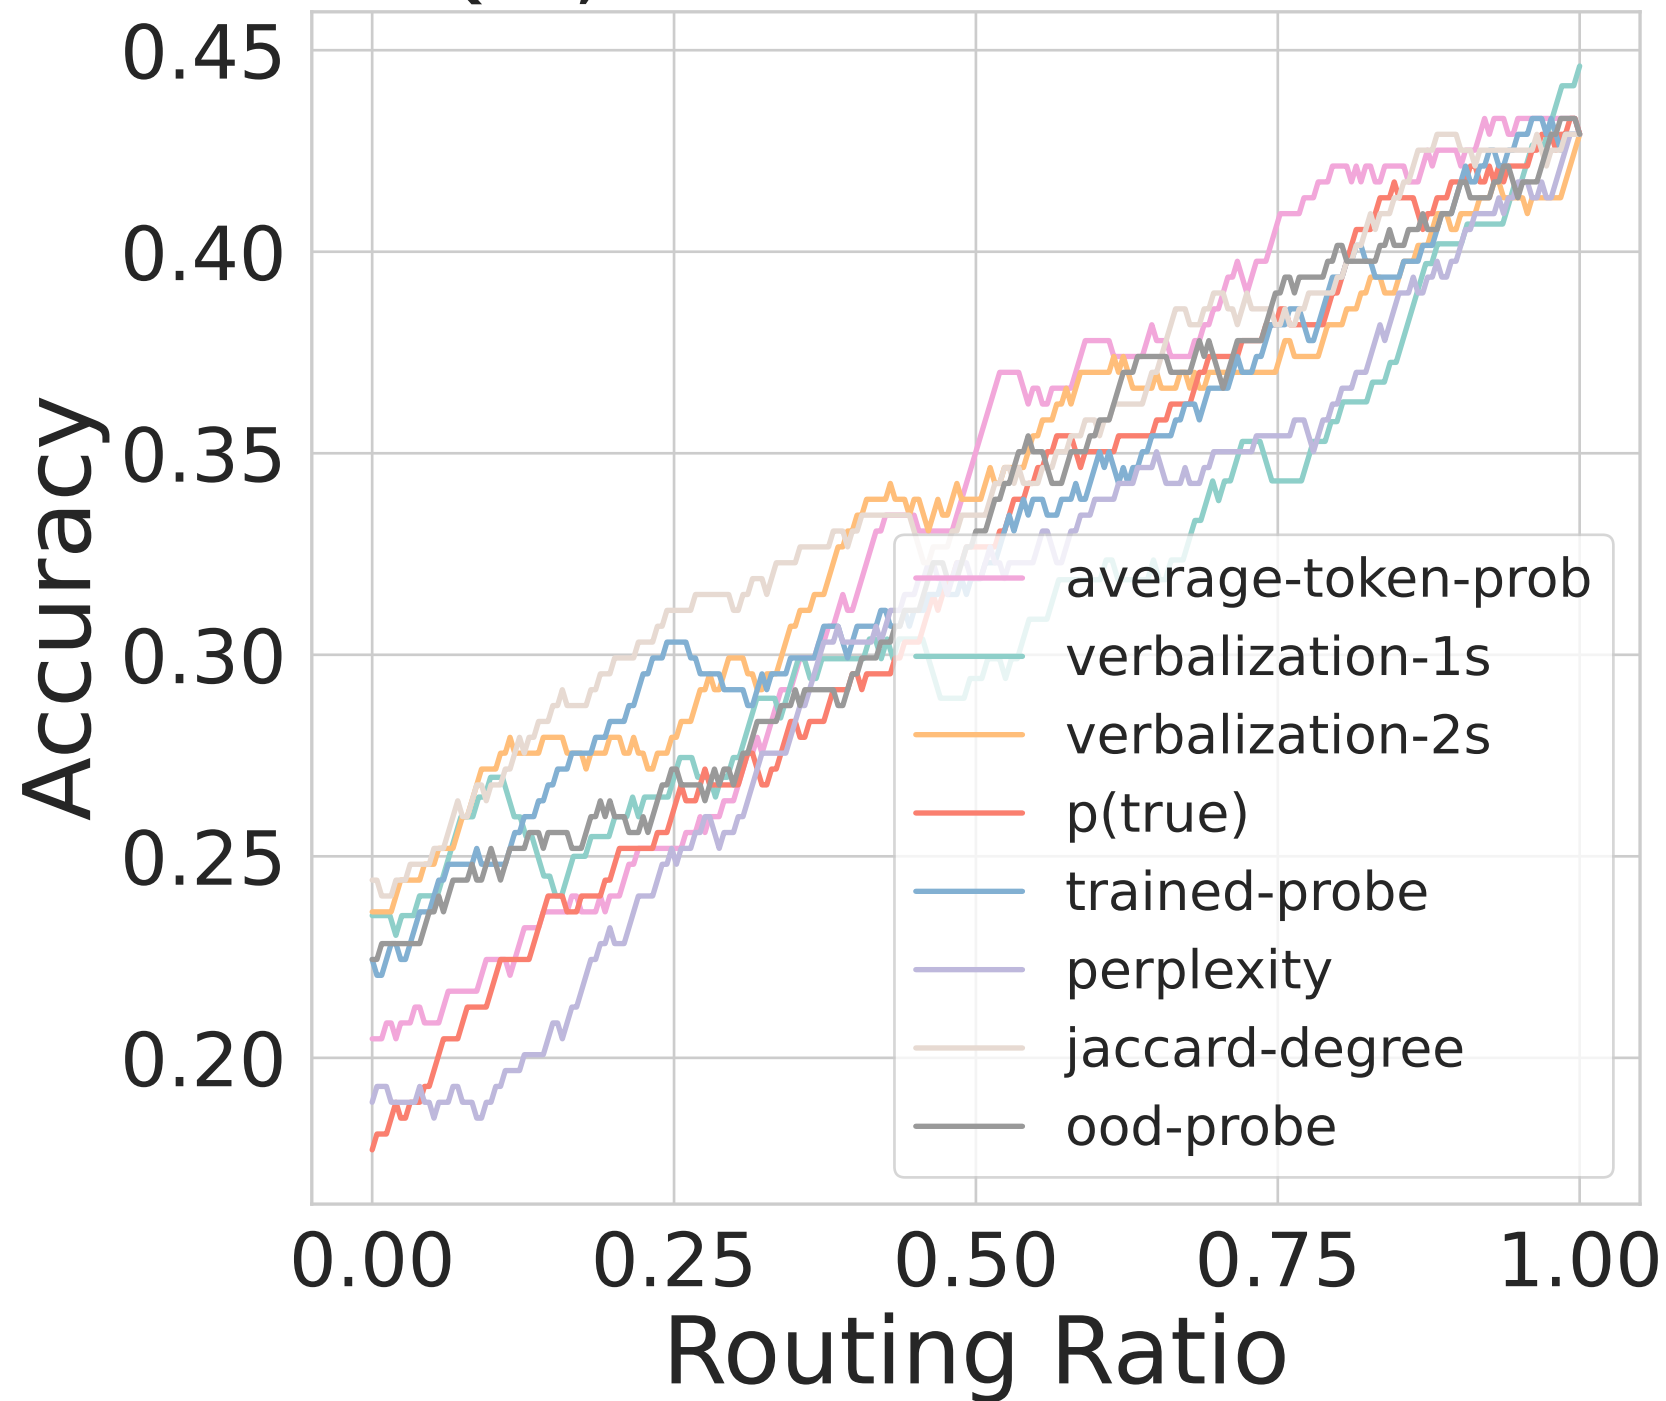

Supplement: supplementary_material [file rr_acc_aqua_llama-3.2-1b_gpt41.pdf › Routing_SLM_LLMs/Uncertainty-based Routing/w_legend/to_gpt41/rr_acc_aqua_llama-3.2-1b_gpt41.pdf]

## AQuA, llama-3.2-3b to GPT-4.1 mini

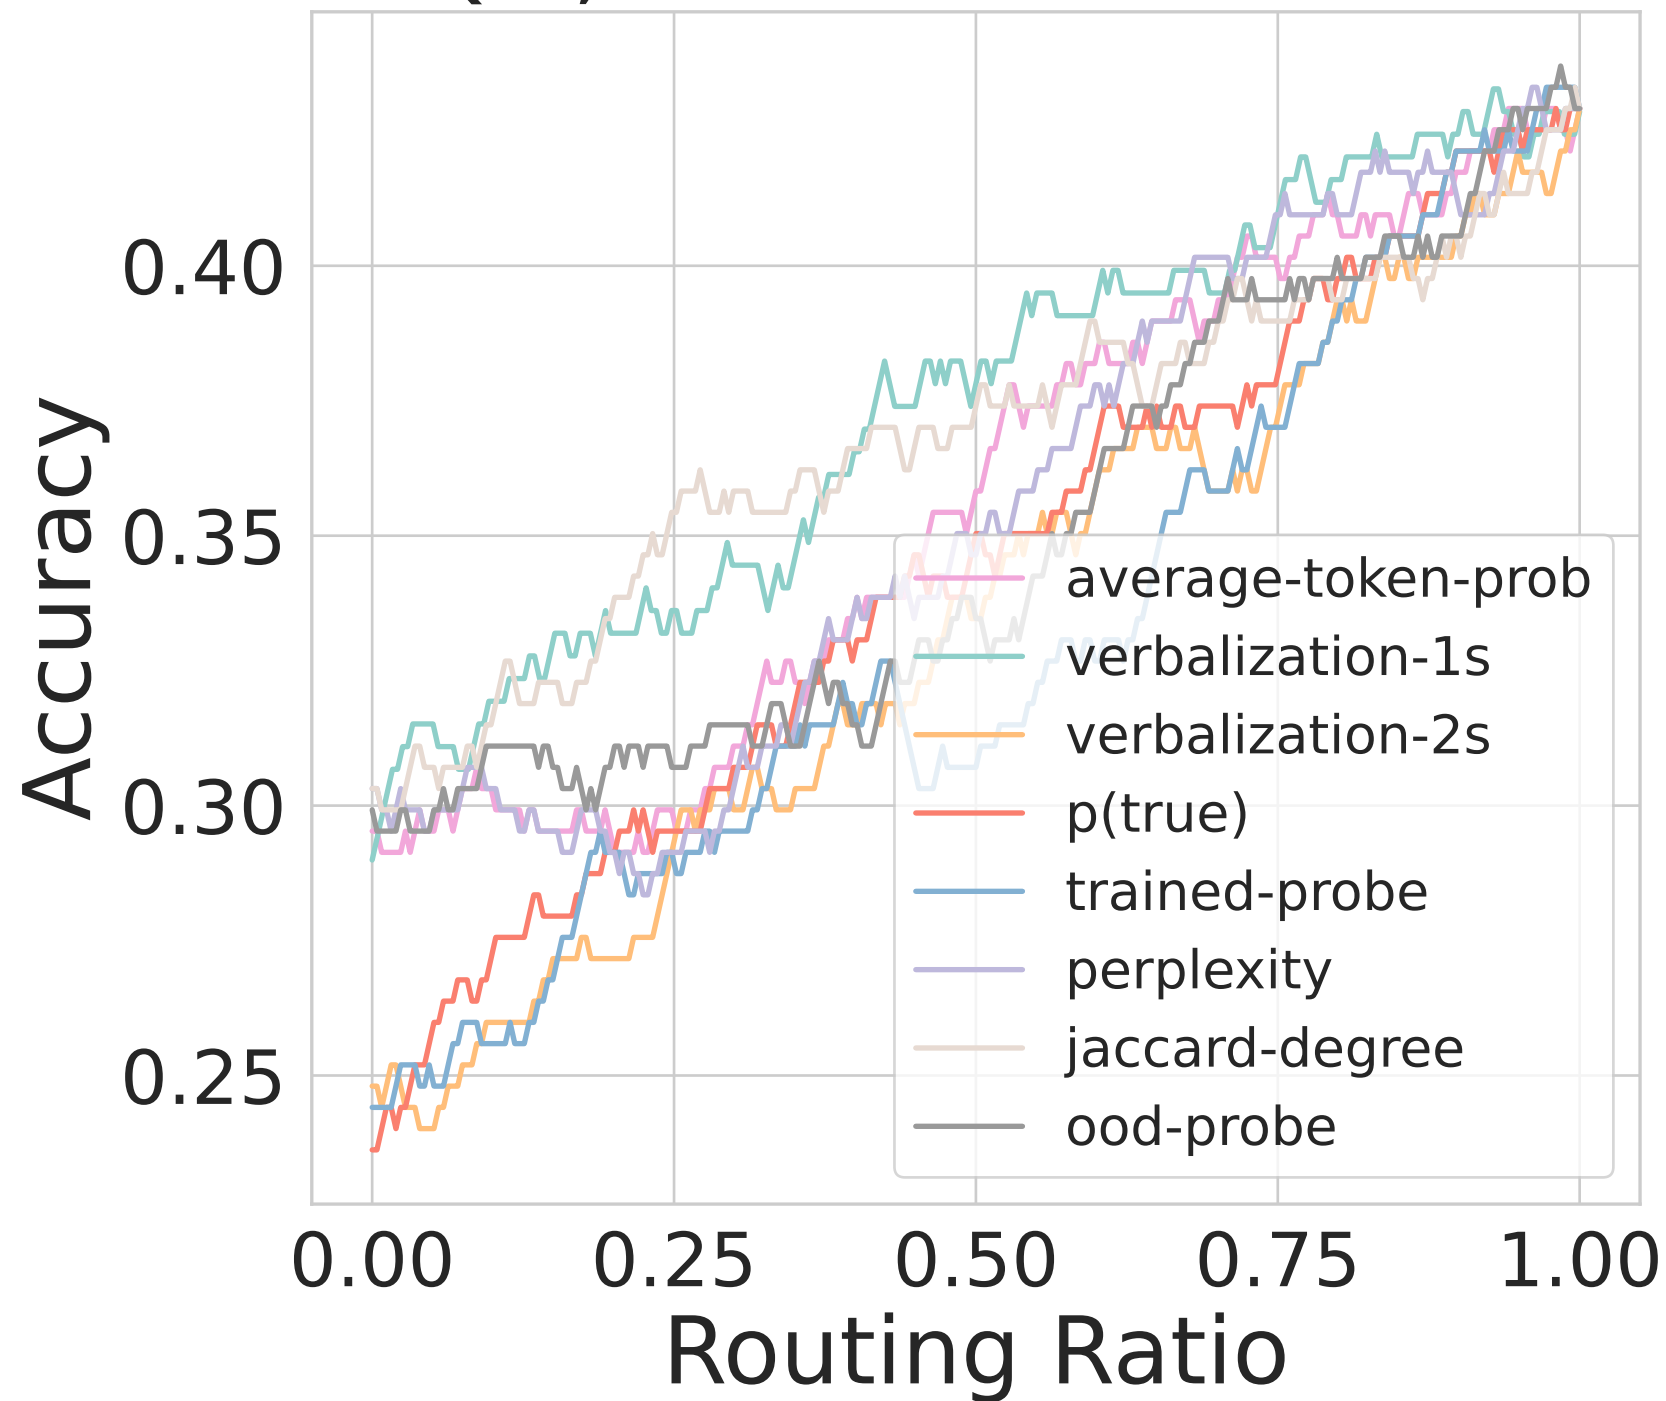

Supplement: supplementary_material [file rr_acc_aqua_llama-3.2-3b_gpt41.pdf › Routing_SLM_LLMs/Uncertainty-based Routing/w_legend/to_gpt41/rr_acc_aqua_llama-3.2-3b_gpt41.pdf]

**AQuA, mistral-7b to GPT-4.1 mini**

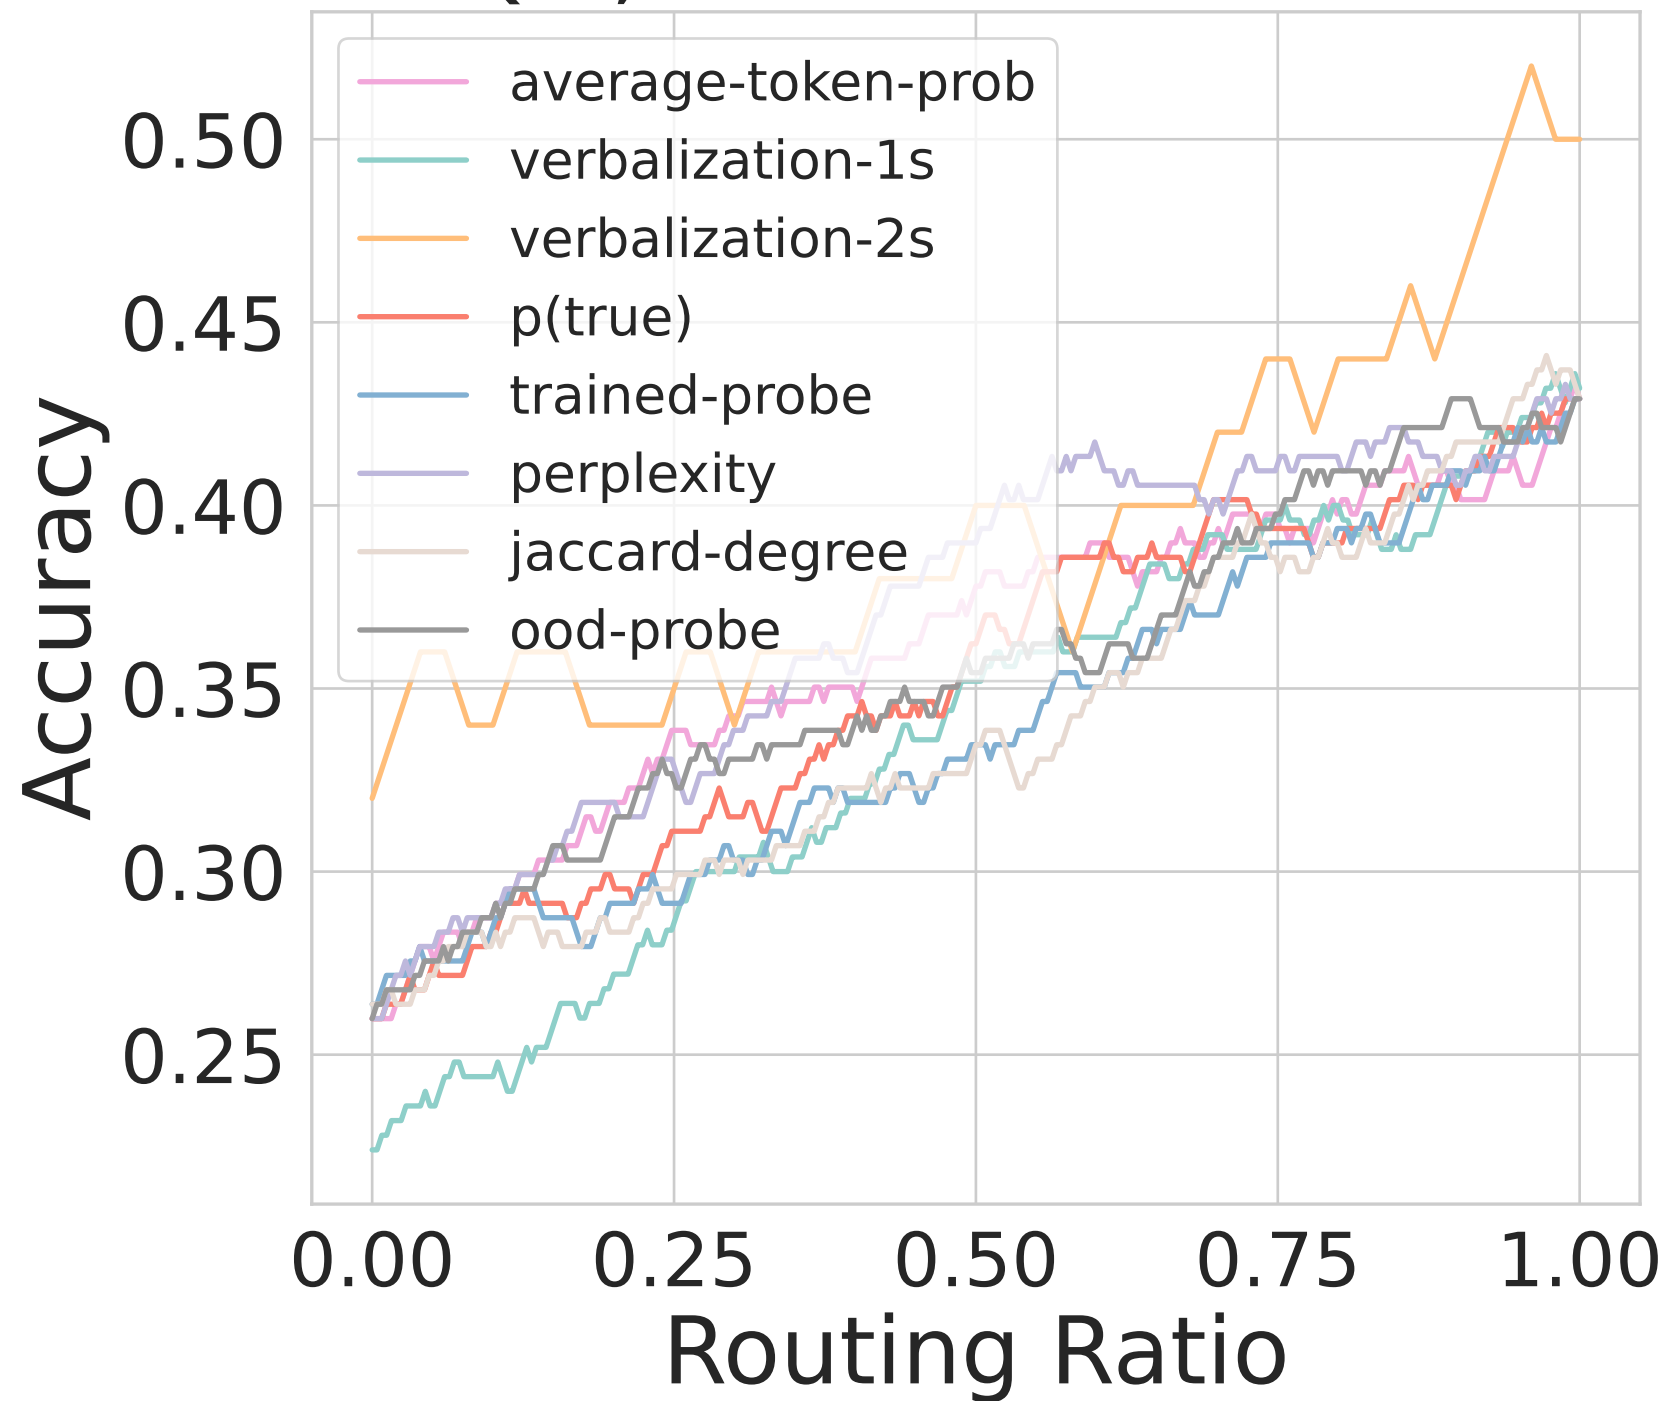

Supplement: supplementary_material [file rr_acc_aqua_mistral-7b_gpt41.pdf › Routing_SLM_LLMs/Uncertainty-based Routing/w_legend/to_gpt41/rr_acc_aqua_mistral-7b_gpt41.pdf]

**AQuA, phi-3.5-mini to GPT-4.1 mini**

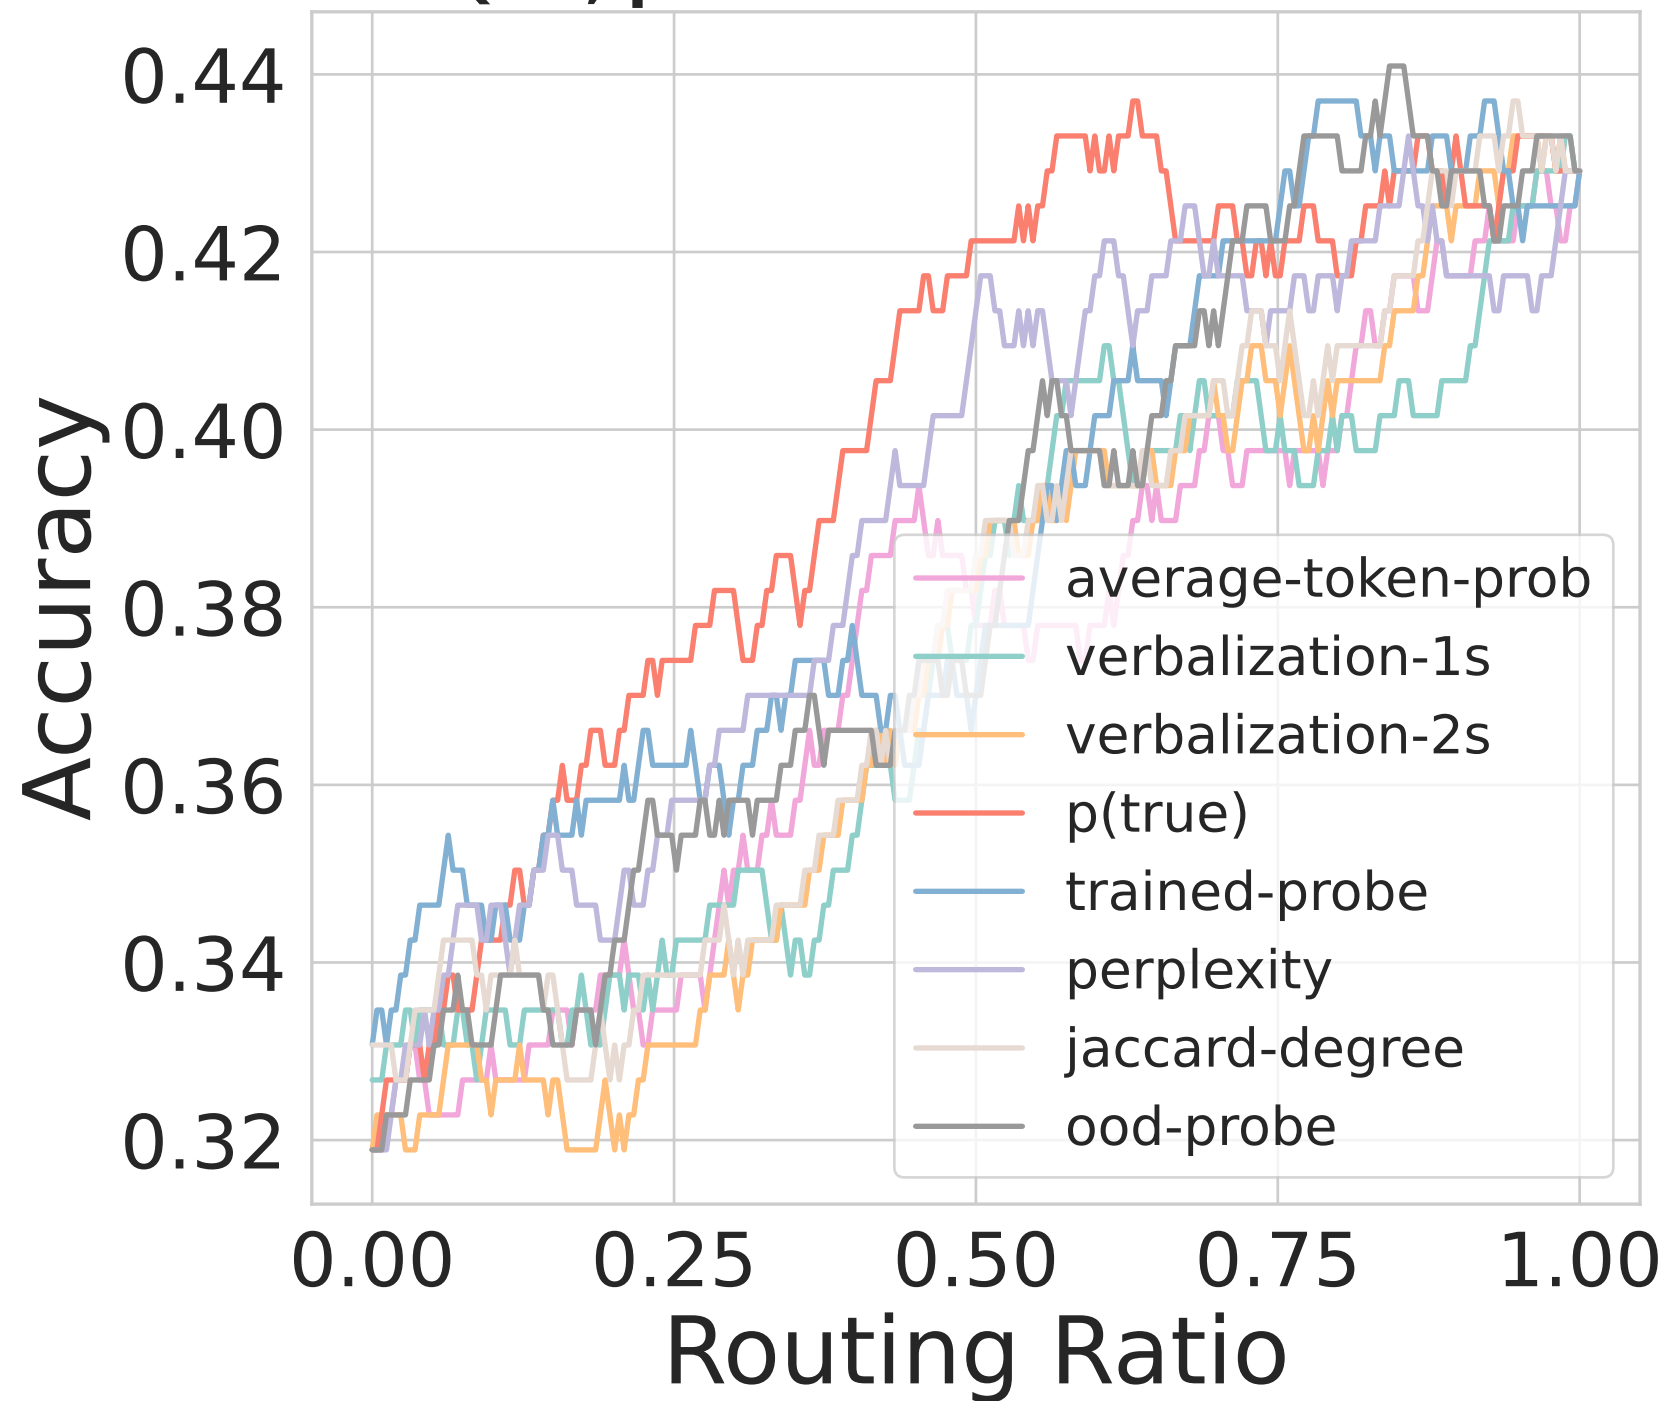

Supplement: supplementary_material [file rr_acc_aqua_phi-3.5-mini_gpt41.pdf › Routing_SLM_LLMs/Uncertainty-based Routing/w_legend/to_gpt41/rr_acc_aqua_phi-3.5-mini_gpt41.pdf]

# AQuA, phi-4-mini-reasoning to GPT-4.1 mini

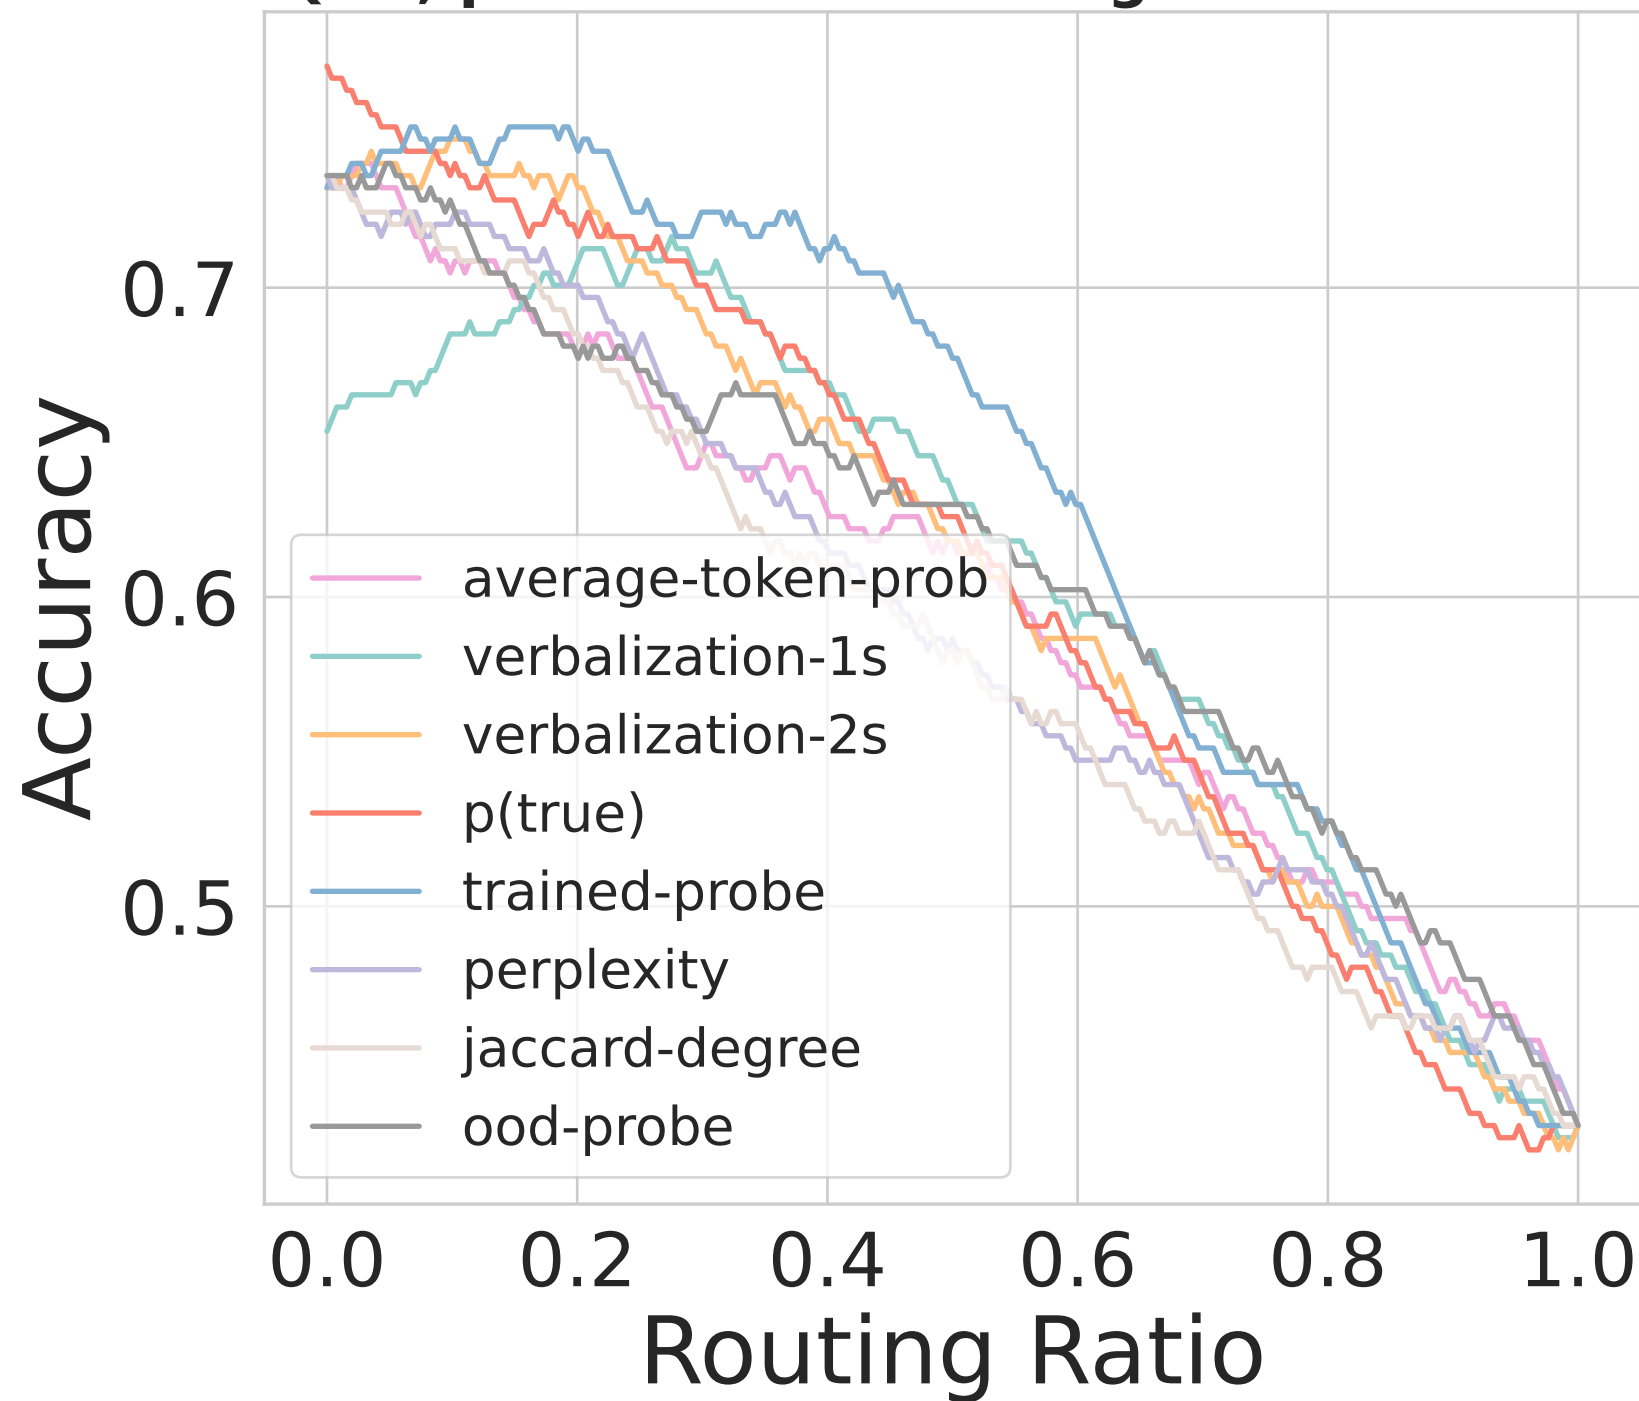

Supplement: supplementary_material [file rr_acc_aqua_phi-4-mini-reasoning_gpt41.pdf › Routing_SLM_LLMs/Uncertainty-based Routing/w_legend/to_gpt41/rr_acc_aqua_phi-4-mini-reasoning_gpt41.pdf]

## AQuA, qwen-2.5-7b to GPT-4.1 mini

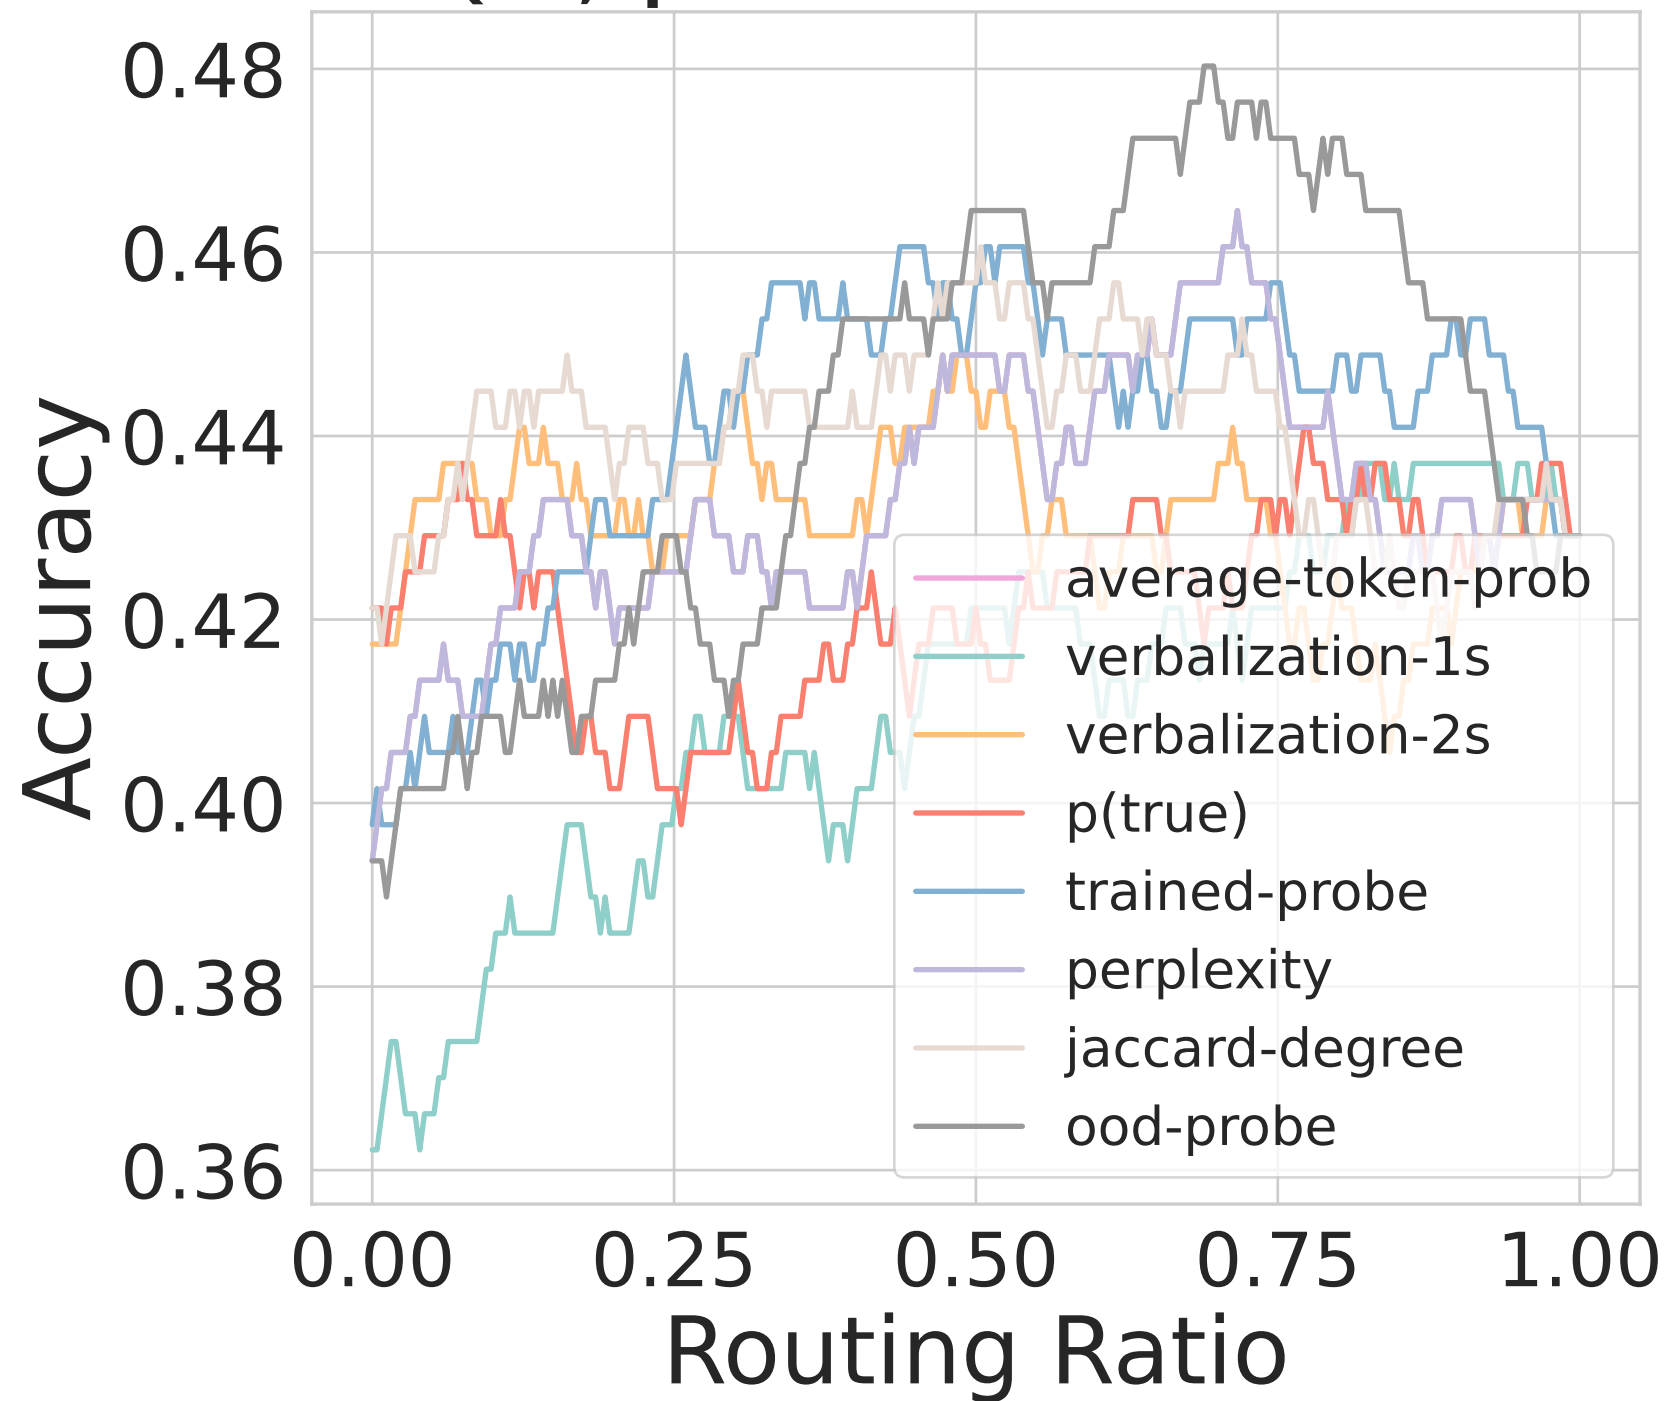

Supplement: supplementary_material [file rr_acc_aqua_qwen-2.5-7b_gpt41.pdf › Routing_SLM_LLMs/Uncertainty-based Routing/w_legend/to_gpt41/rr_acc_aqua_qwen-2.5-7b_gpt41.pdf]

## AQuA, rwkv to GPT-4.1 mini

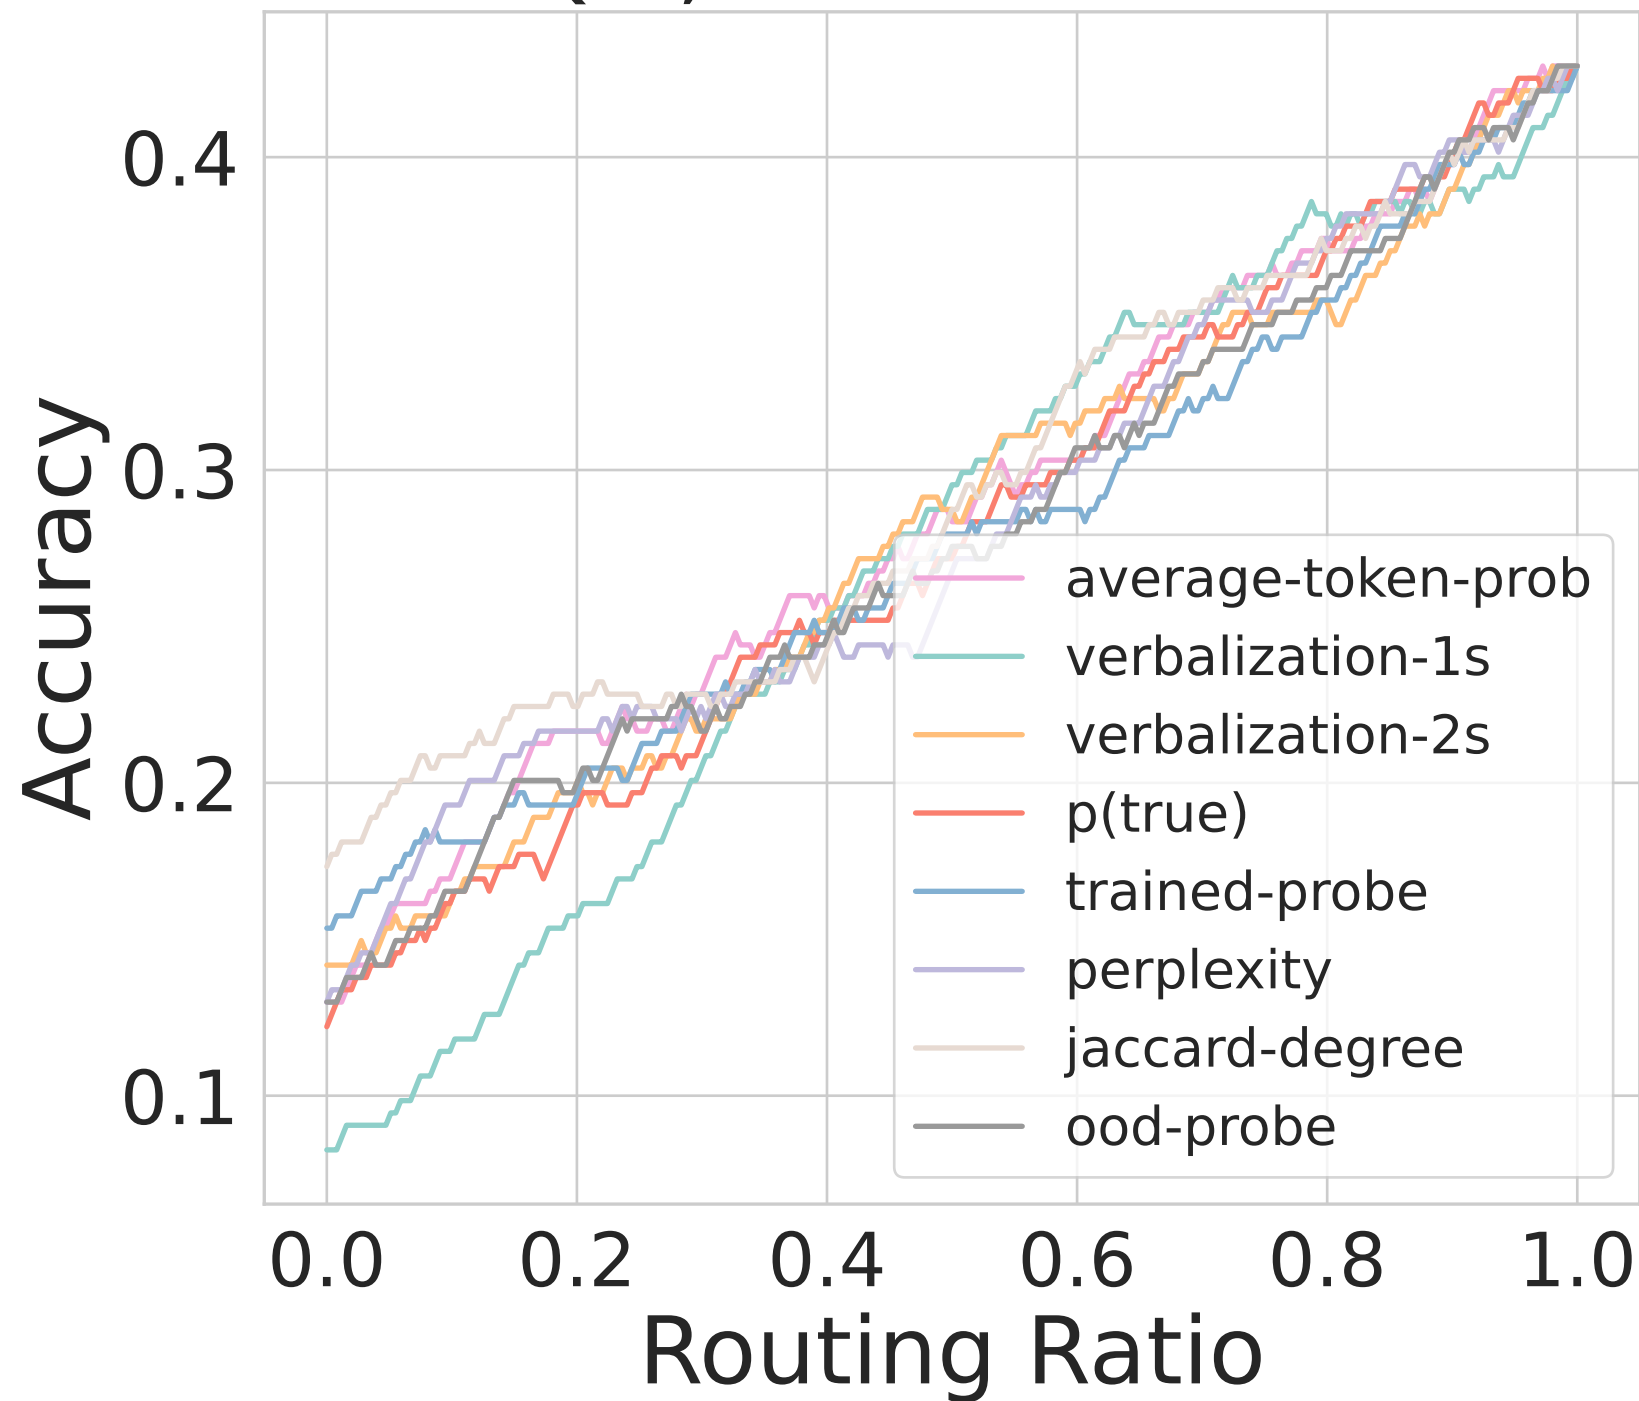

Supplement: supplementary_material [file rr_acc_aqua_rwkv_gpt41.pdf › Routing_SLM_LLMs/Uncertainty-based Routing/w_legend/to_gpt41/rr_acc_aqua_rwkv_gpt41.pdf]

## BoolQ, Qwen3-0.6B to GPT-4.1 mini

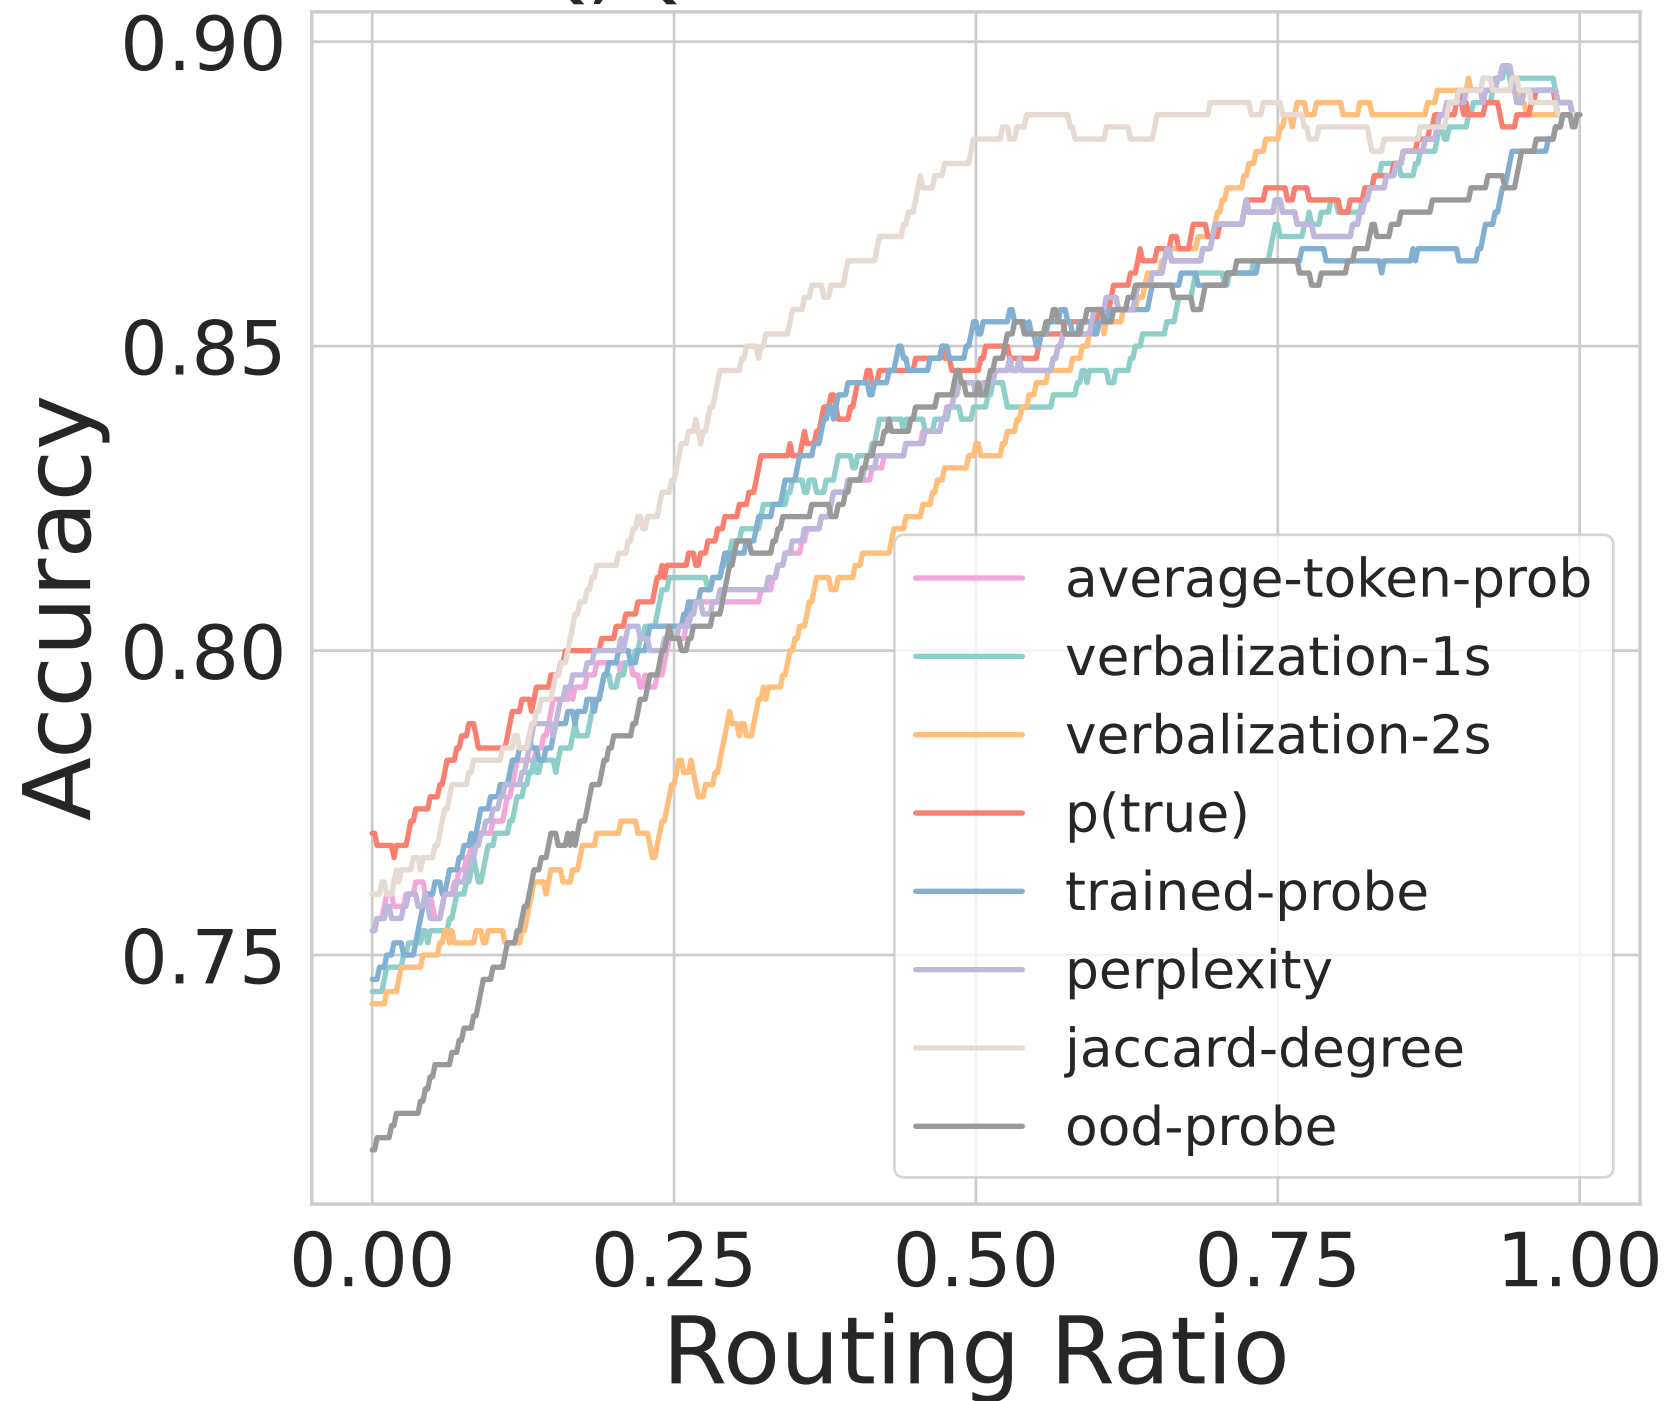

Supplement: supplementary_material [file rr_acc_boolq_Qwen3-0.6B_gpt41.pdf › Routing_SLM_LLMs/Uncertainty-based Routing/w_legend/to_gpt41/rr_acc_boolq_Qwen3-0.6B_gpt41.pdf]

**BoolQ, Qwen3-1.7B to GPT-4.1 mini**

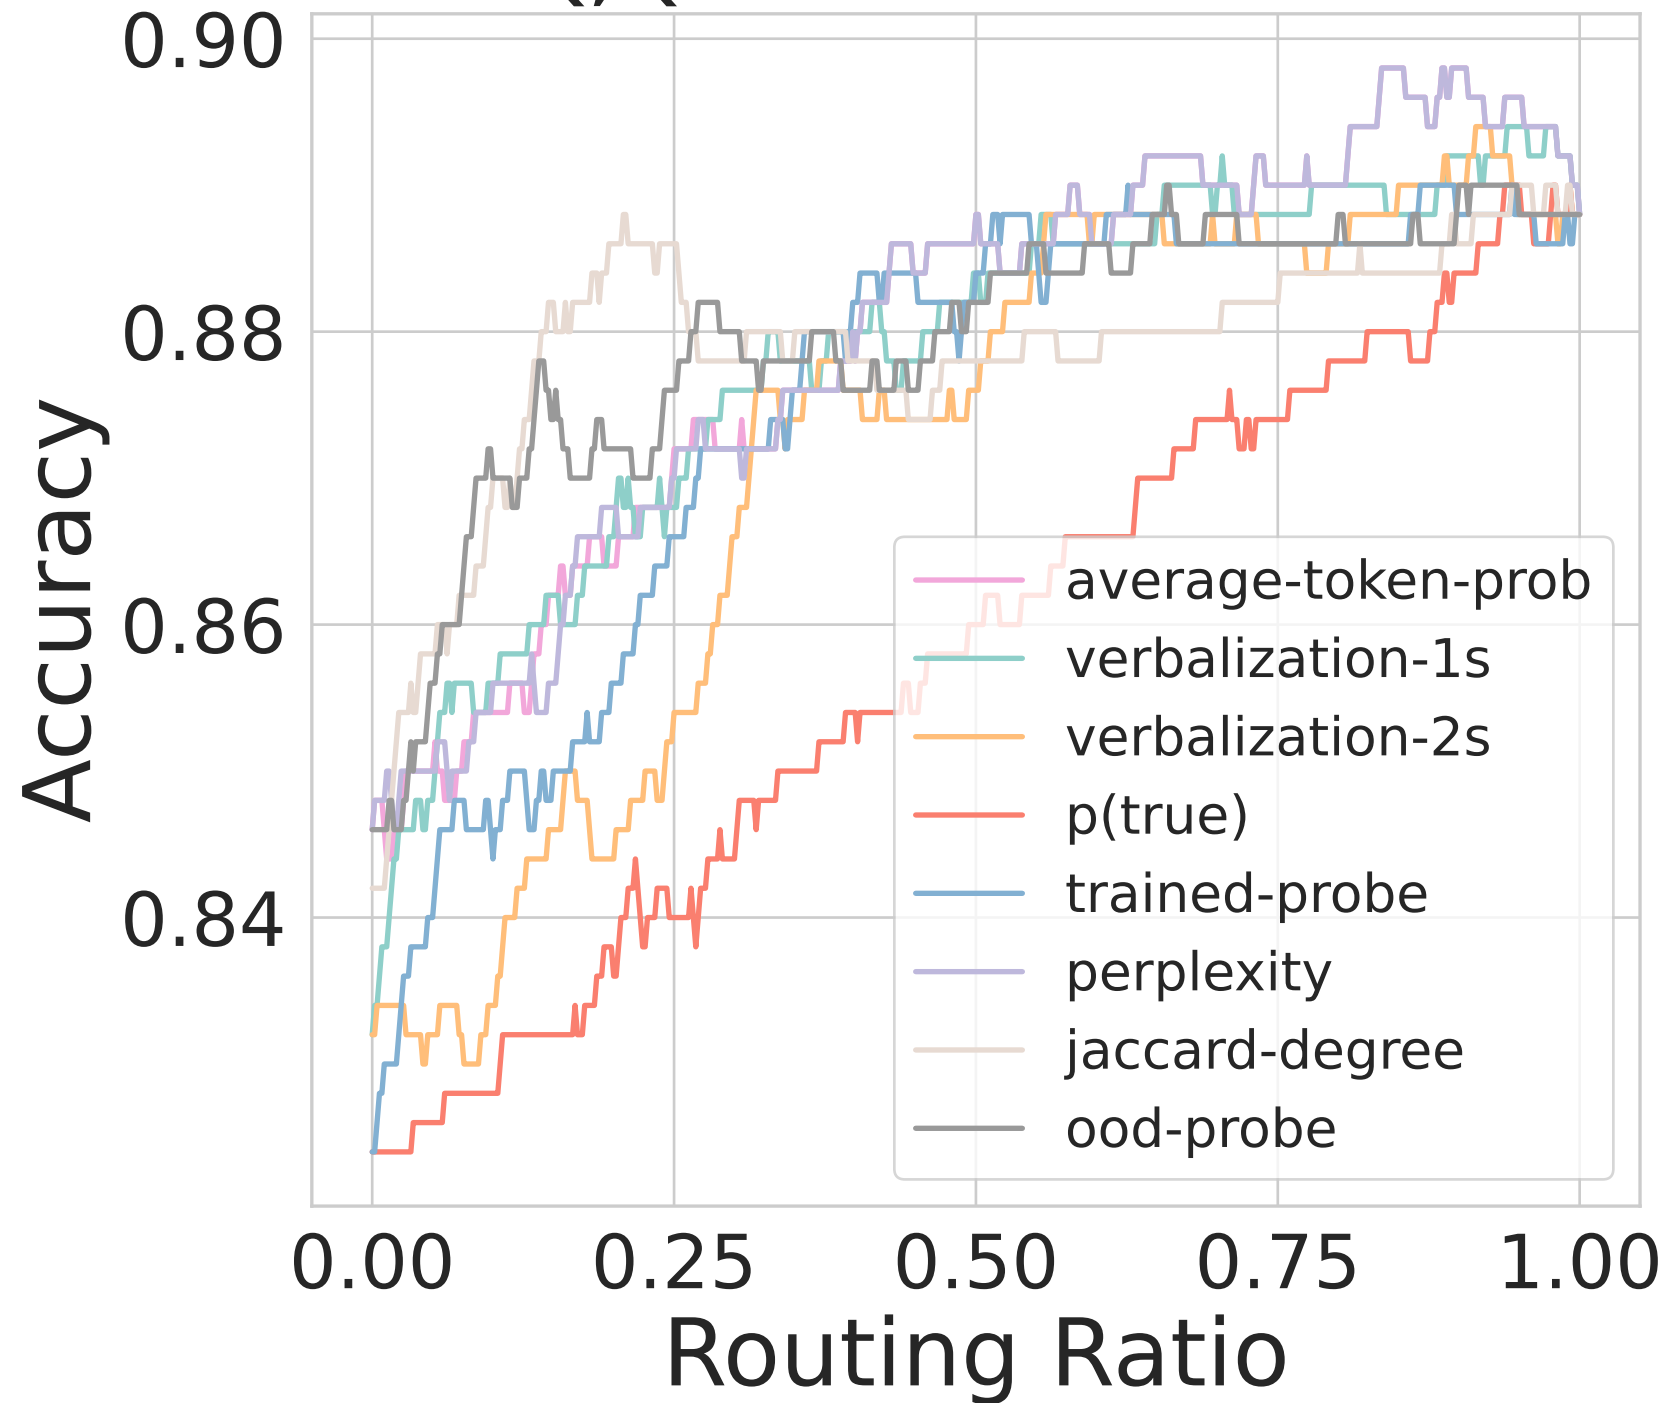

Supplement: supplementary_material [file rr_acc_boolq_Qwen3-1.7B_gpt41.pdf › Routing_SLM_LLMs/Uncertainty-based Routing/w_legend/to_gpt41/rr_acc_boolq_Qwen3-1.7B_gpt41.pdf]

**BoolQ, Qwen3-4B to GPT-4.1 mini**

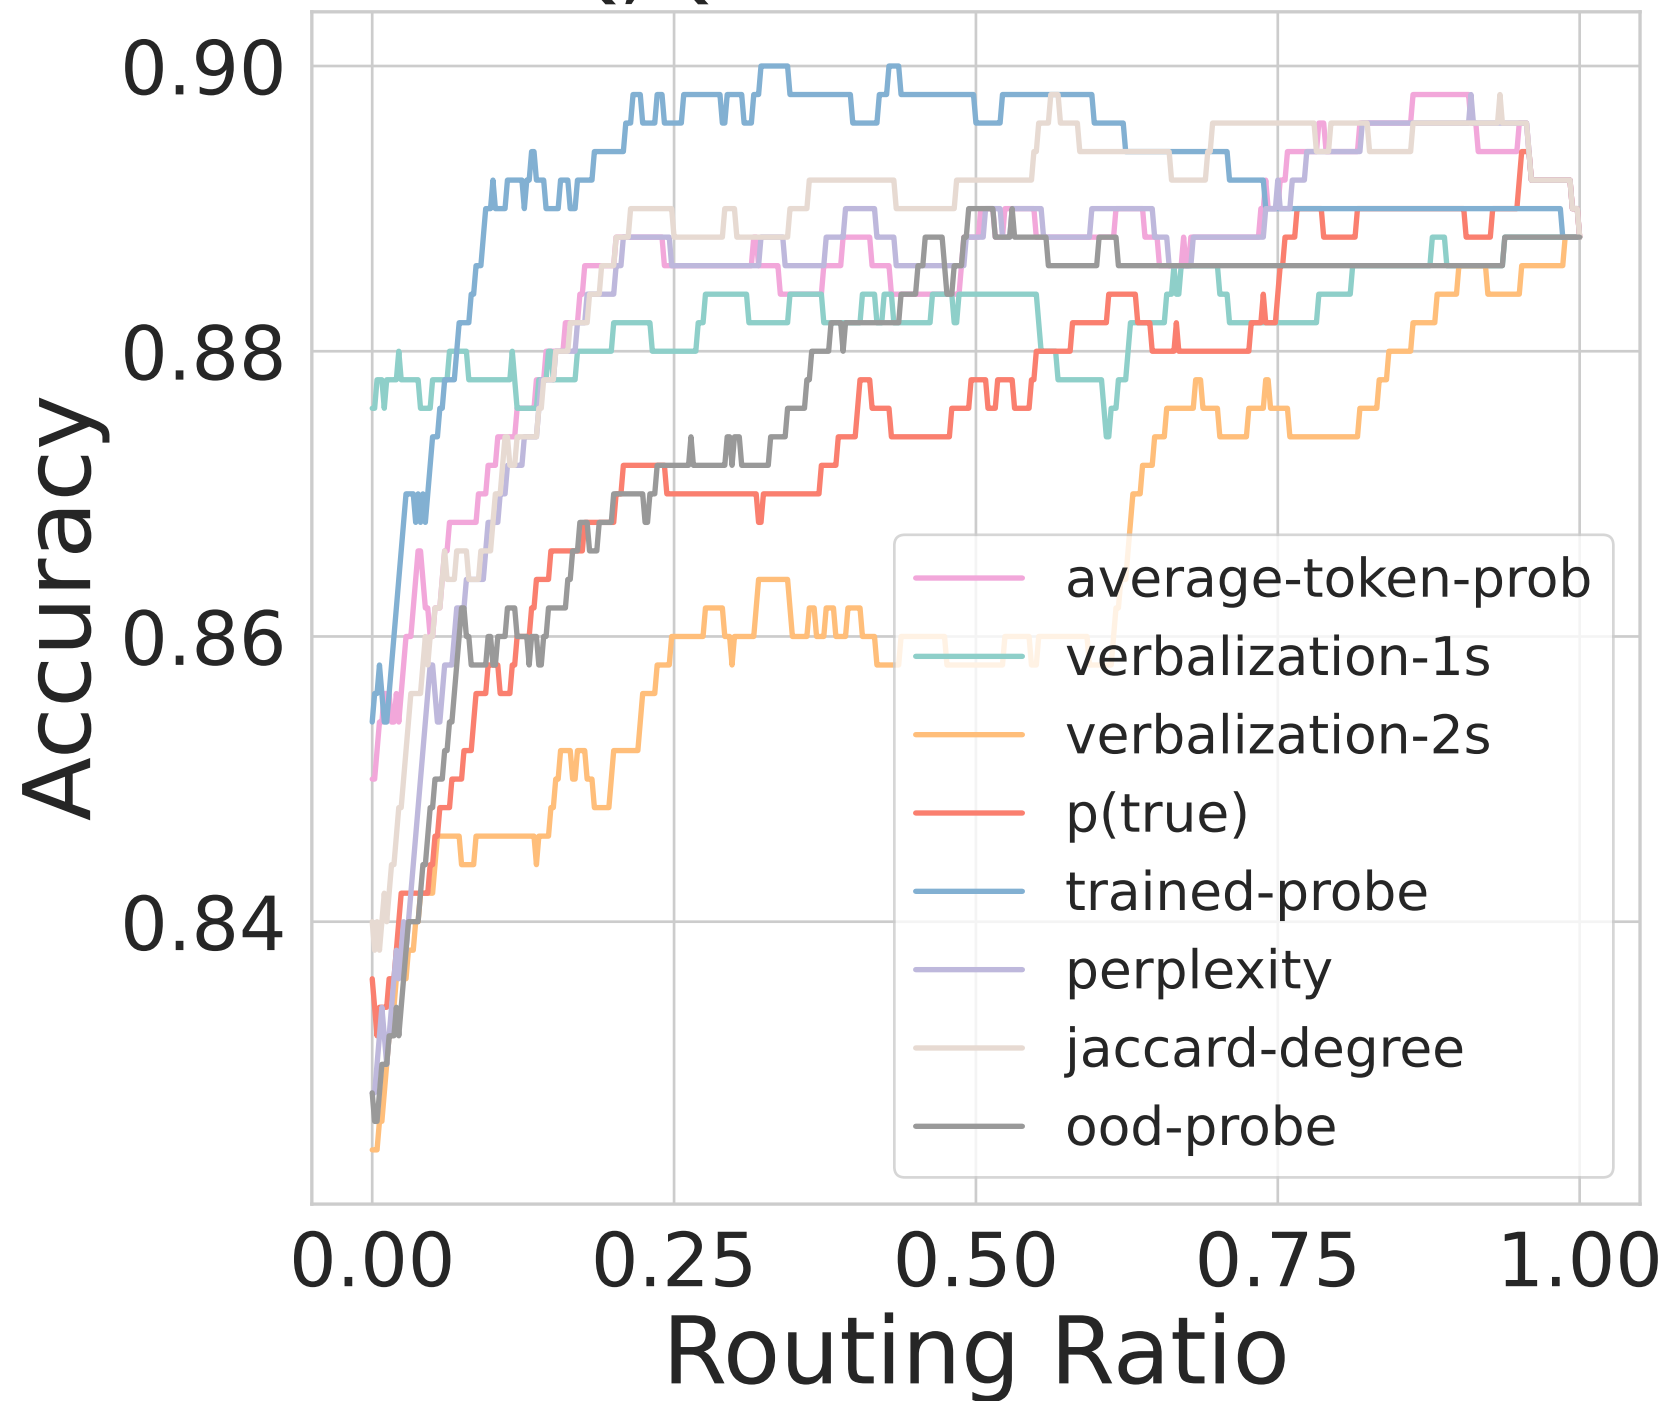

Supplement: supplementary_material [file rr_acc_boolq_Qwen3-4B_gpt41.pdf › Routing_SLM_LLMs/Uncertainty-based Routing/w_legend/to_gpt41/rr_acc_boolq_Qwen3-4B_gpt41.pdf]

## BoolQ, granite-3.1-8b to GPT-4.1 mini

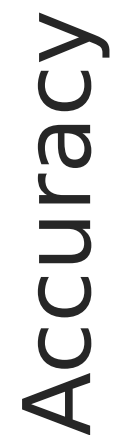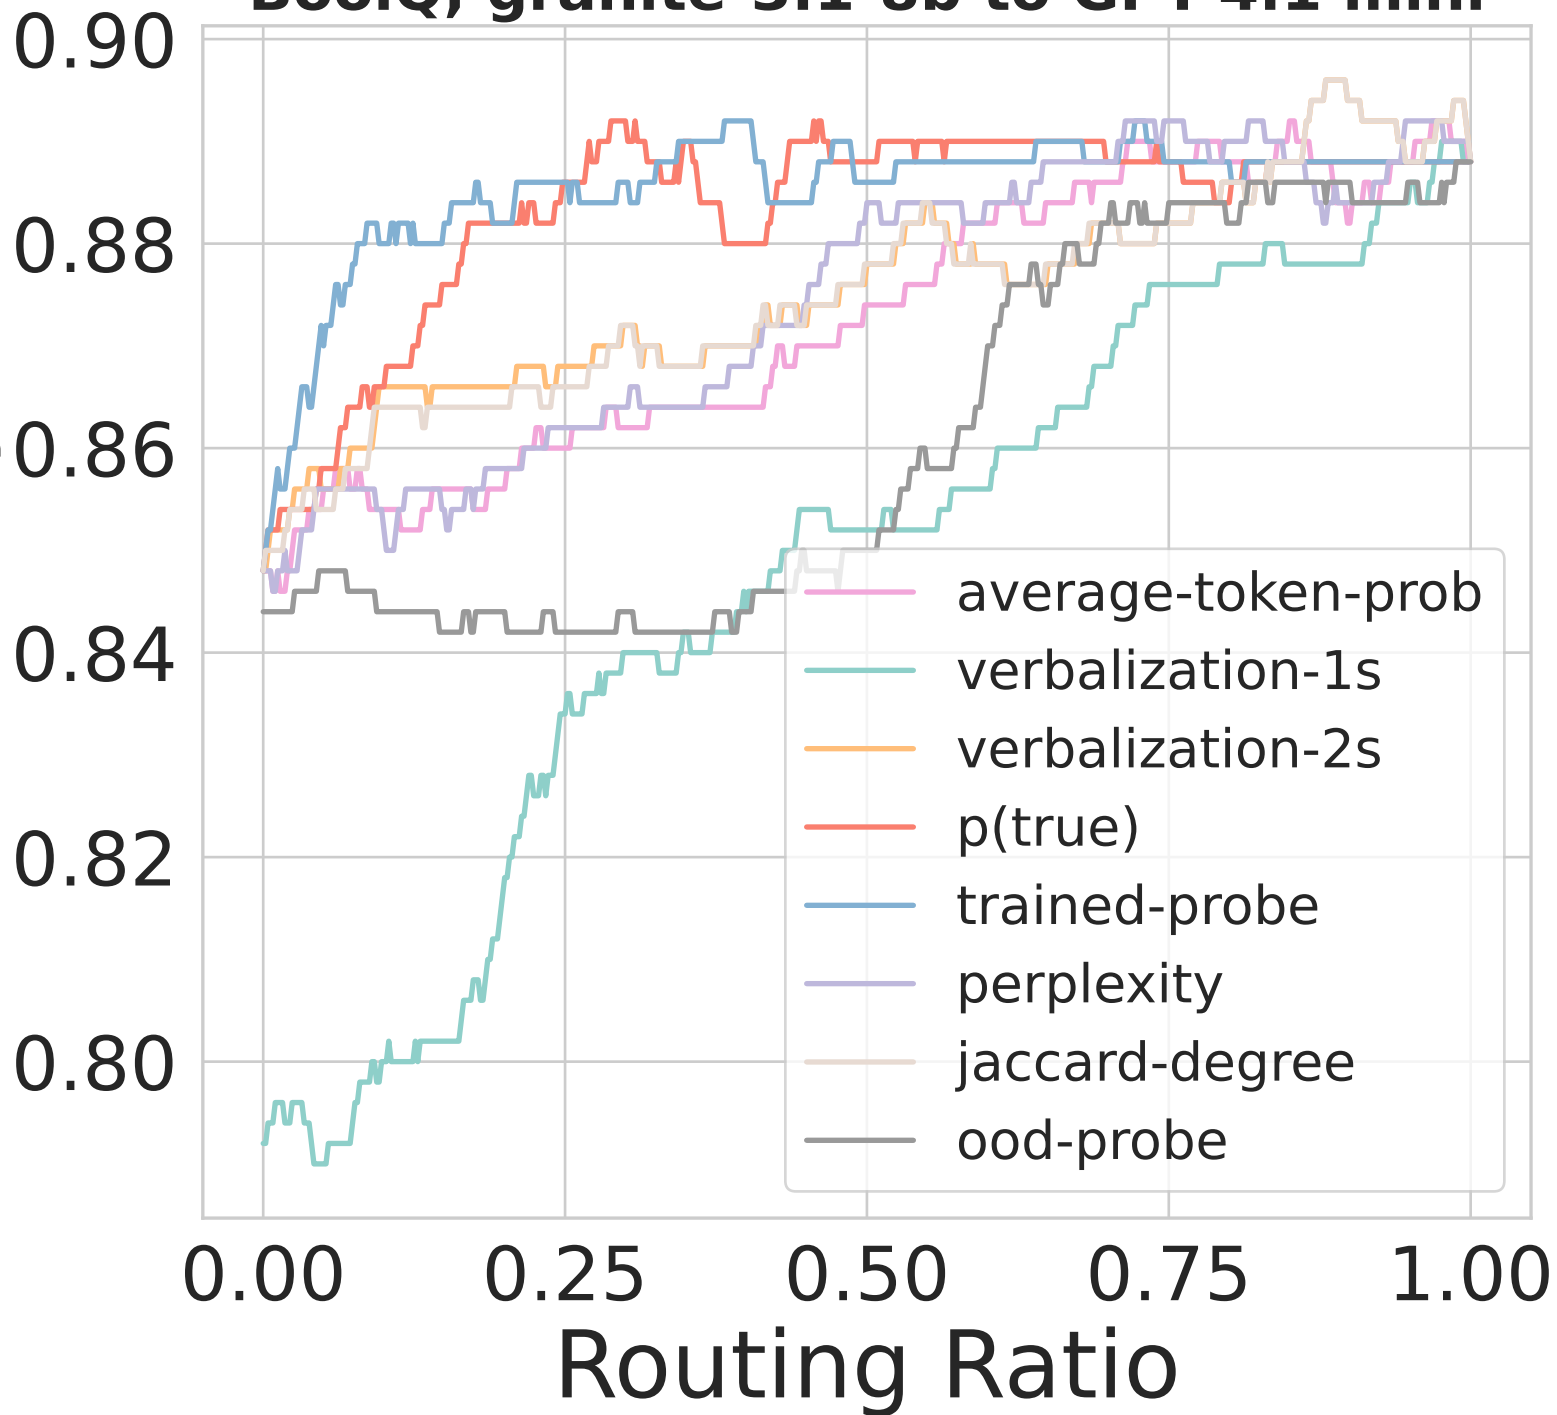

Supplement: supplementary_material [file rr_acc_boolq_granite-3.1-8b_gpt41.pdf › Routing_SLM_LLMs/Uncertainty-based Routing/w_legend/to_gpt41/rr_acc_boolq_granite-3.1-8b_gpt41.pdf]

# BoolQ, llama-3.1-8b to GPT-4.1 mini

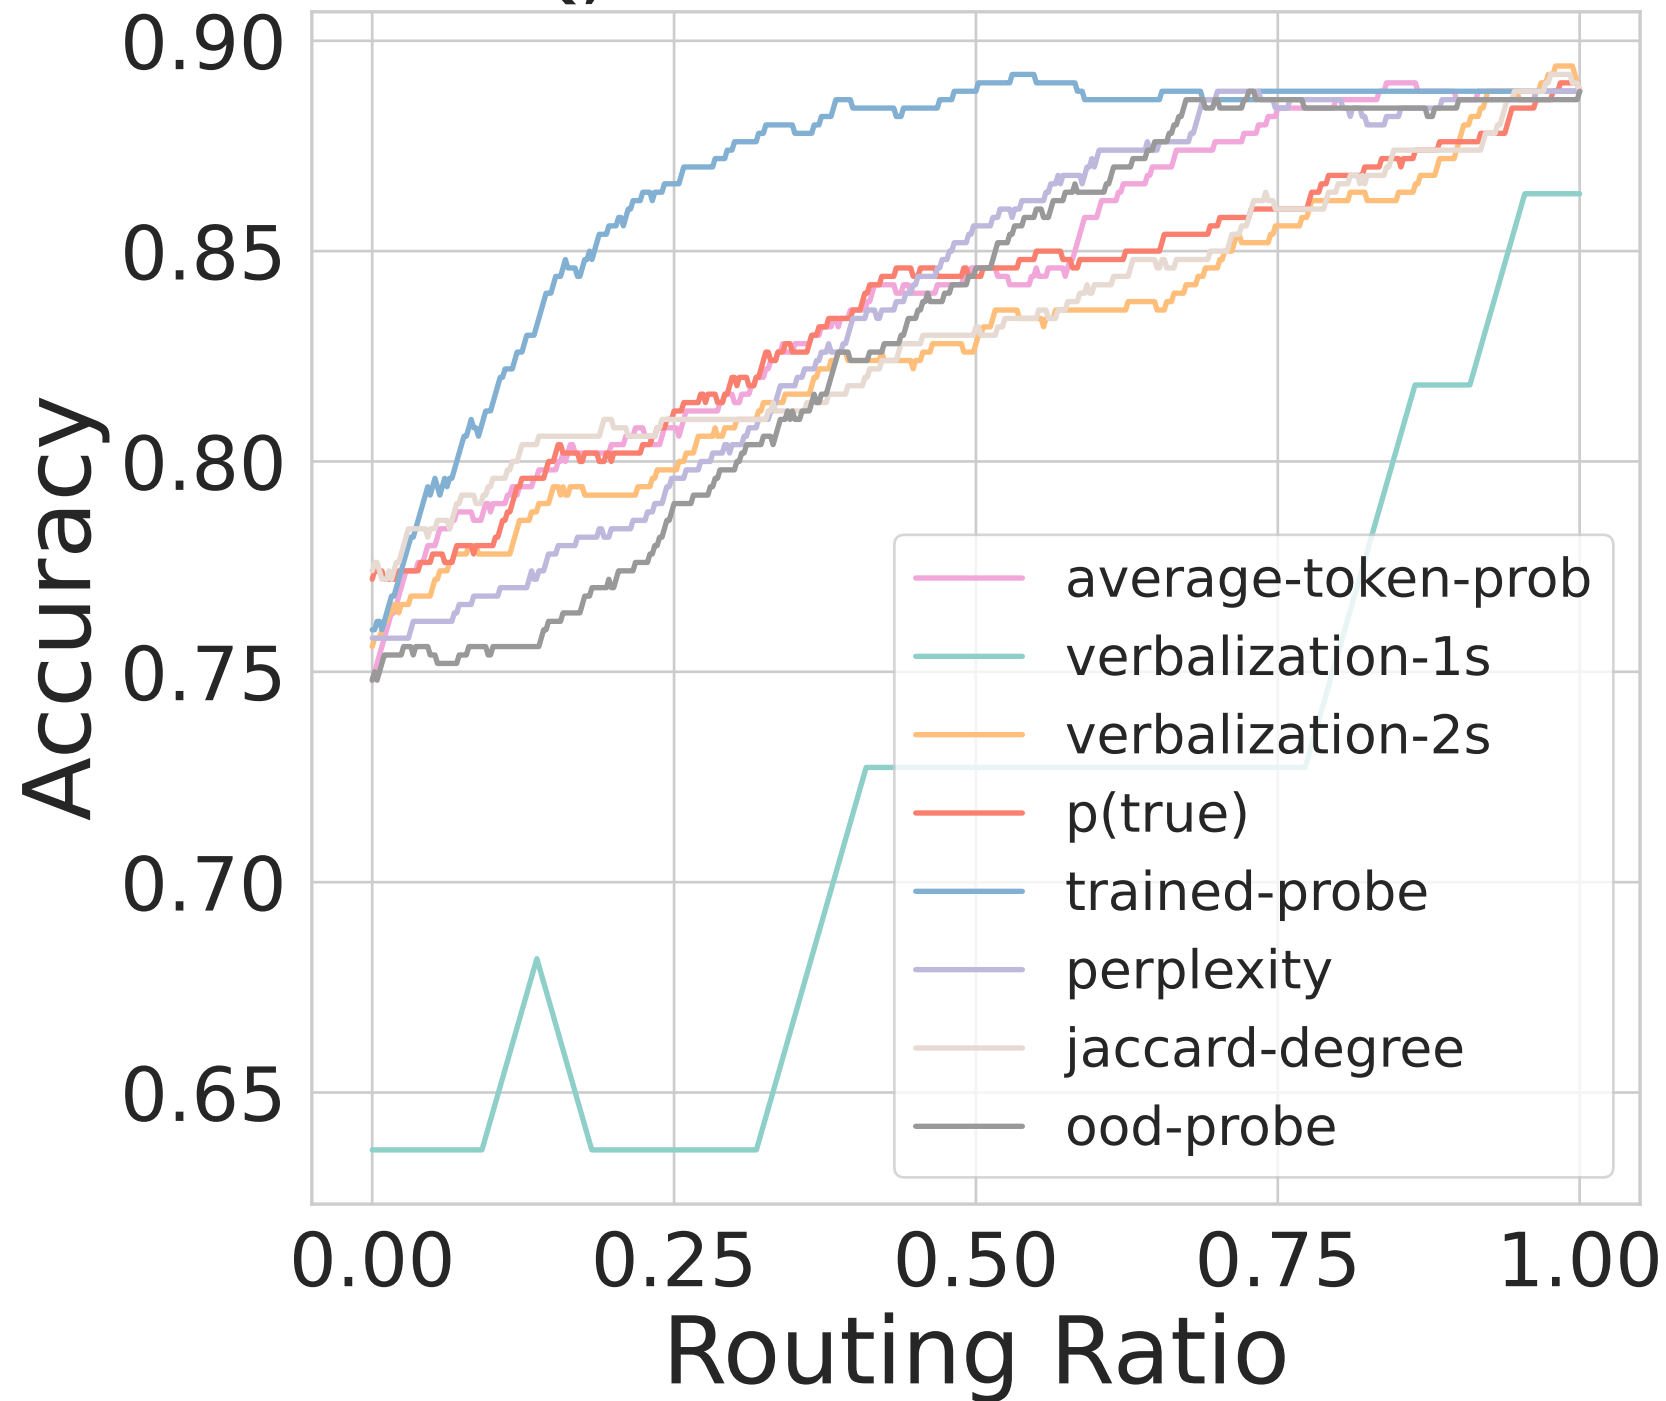

Supplement: supplementary_material [file rr_acc_boolq_llama-3.1-8b_gpt41.pdf › Routing_SLM_LLMs/Uncertainty-based Routing/w_legend/to_gpt41/rr_acc_boolq_llama-3.1-8b_gpt41.pdf]

# BoolQ, llama-3.2-1b to GPT-4.1 mini

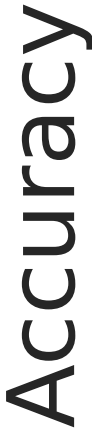

verbalization-1s

 $p(\text{true})$ 

perplexity

ood-probe

|  |  |
|--|--|
|  |  |
|  |  |

Supplement: supplementary_material [file rr_acc_boolq_llama-3.2-1b_gpt41.pdf › Routing_SLM_LLMs/Uncertainty-based Routing/w_legend/to_gpt41/rr_acc_boolq_llama-3.2-1b_gpt41.pdf]

## BoolQ, llama-3.2-3b to GPT-4.1 mini

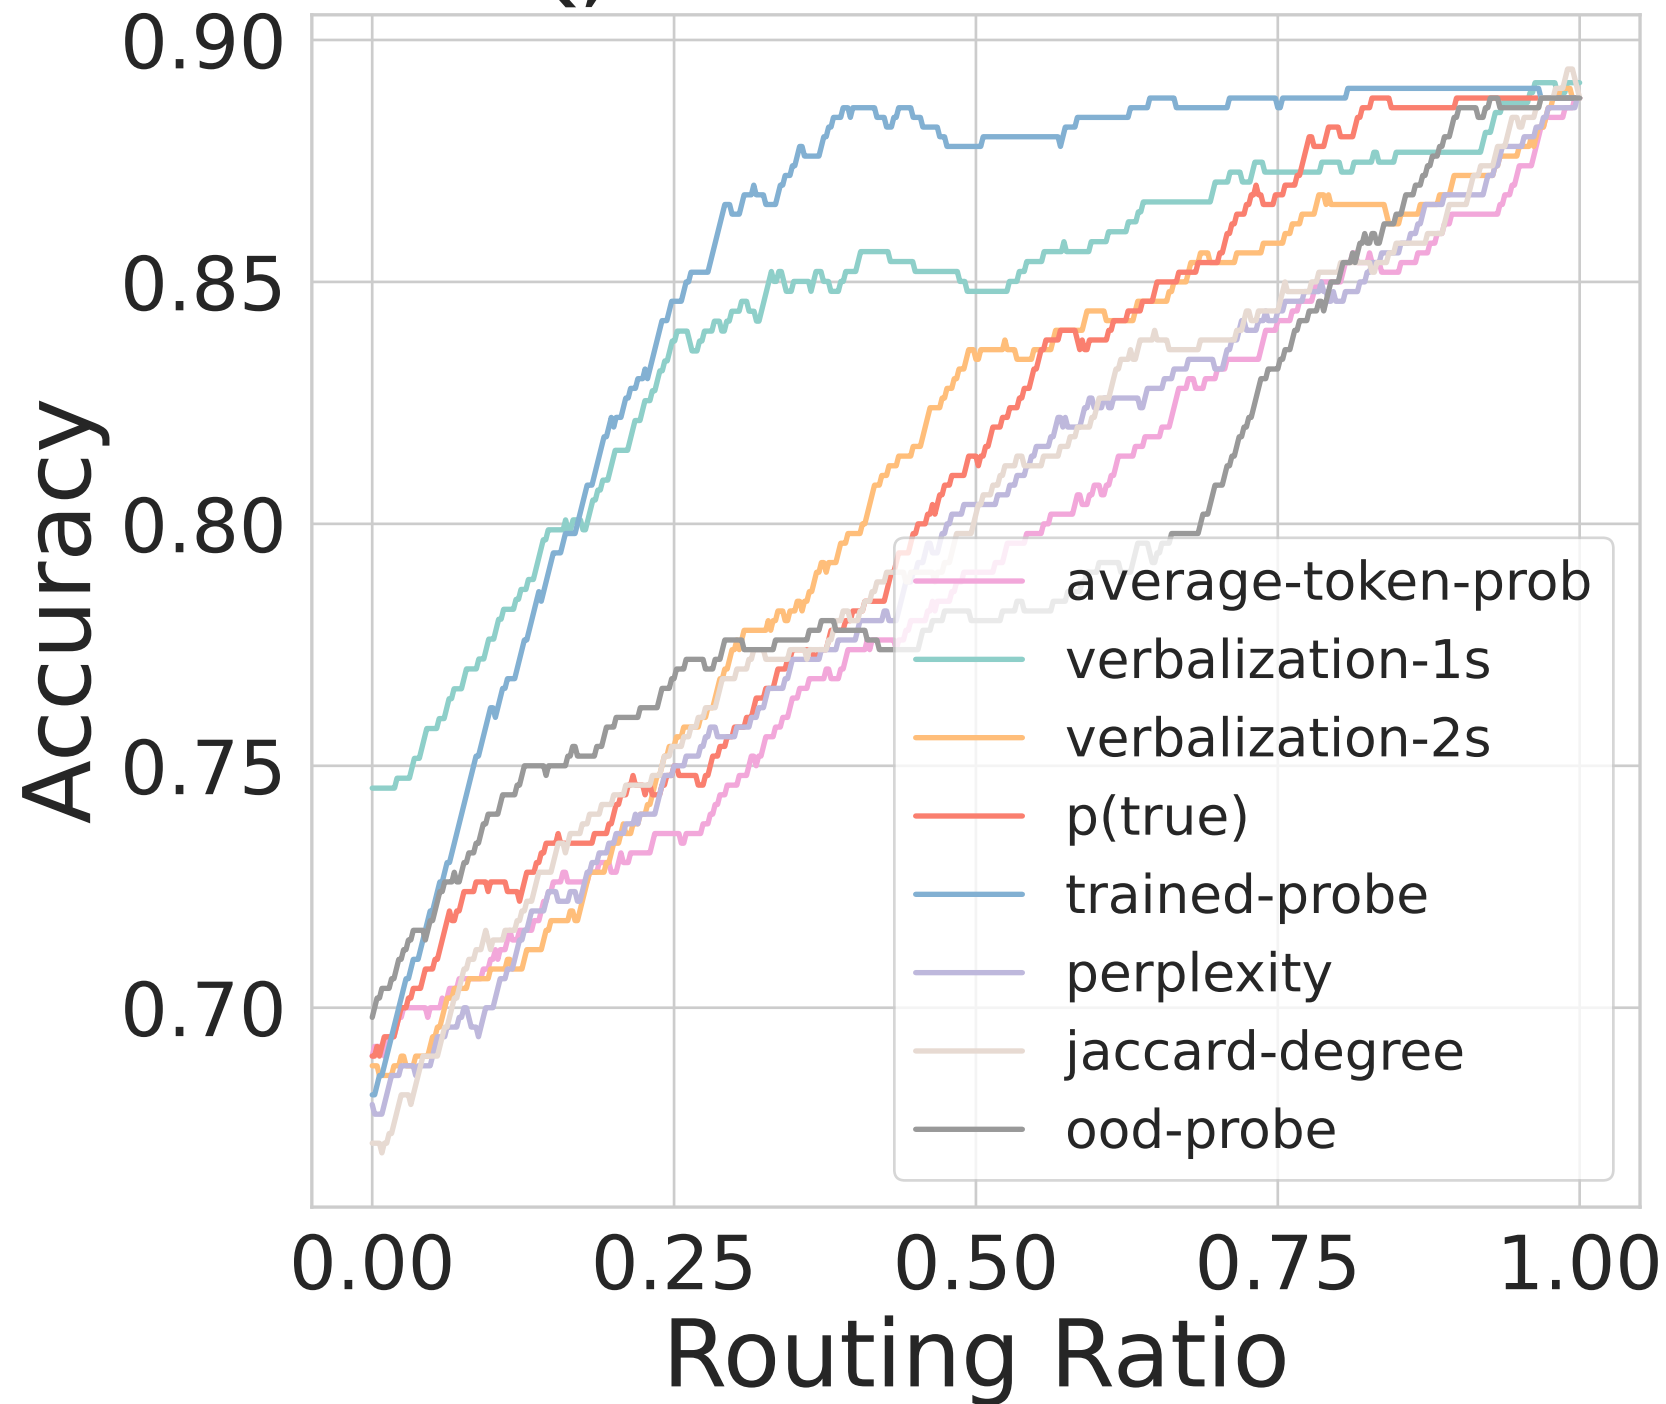

Supplement: supplementary_material [file rr_acc_boolq_llama-3.2-3b_gpt41.pdf › Routing_SLM_LLMs/Uncertainty-based Routing/w_legend/to_gpt41/rr_acc_boolq_llama-3.2-3b_gpt41.pdf]

# BoolQ, mistral-7b to GPT-4.1 mini

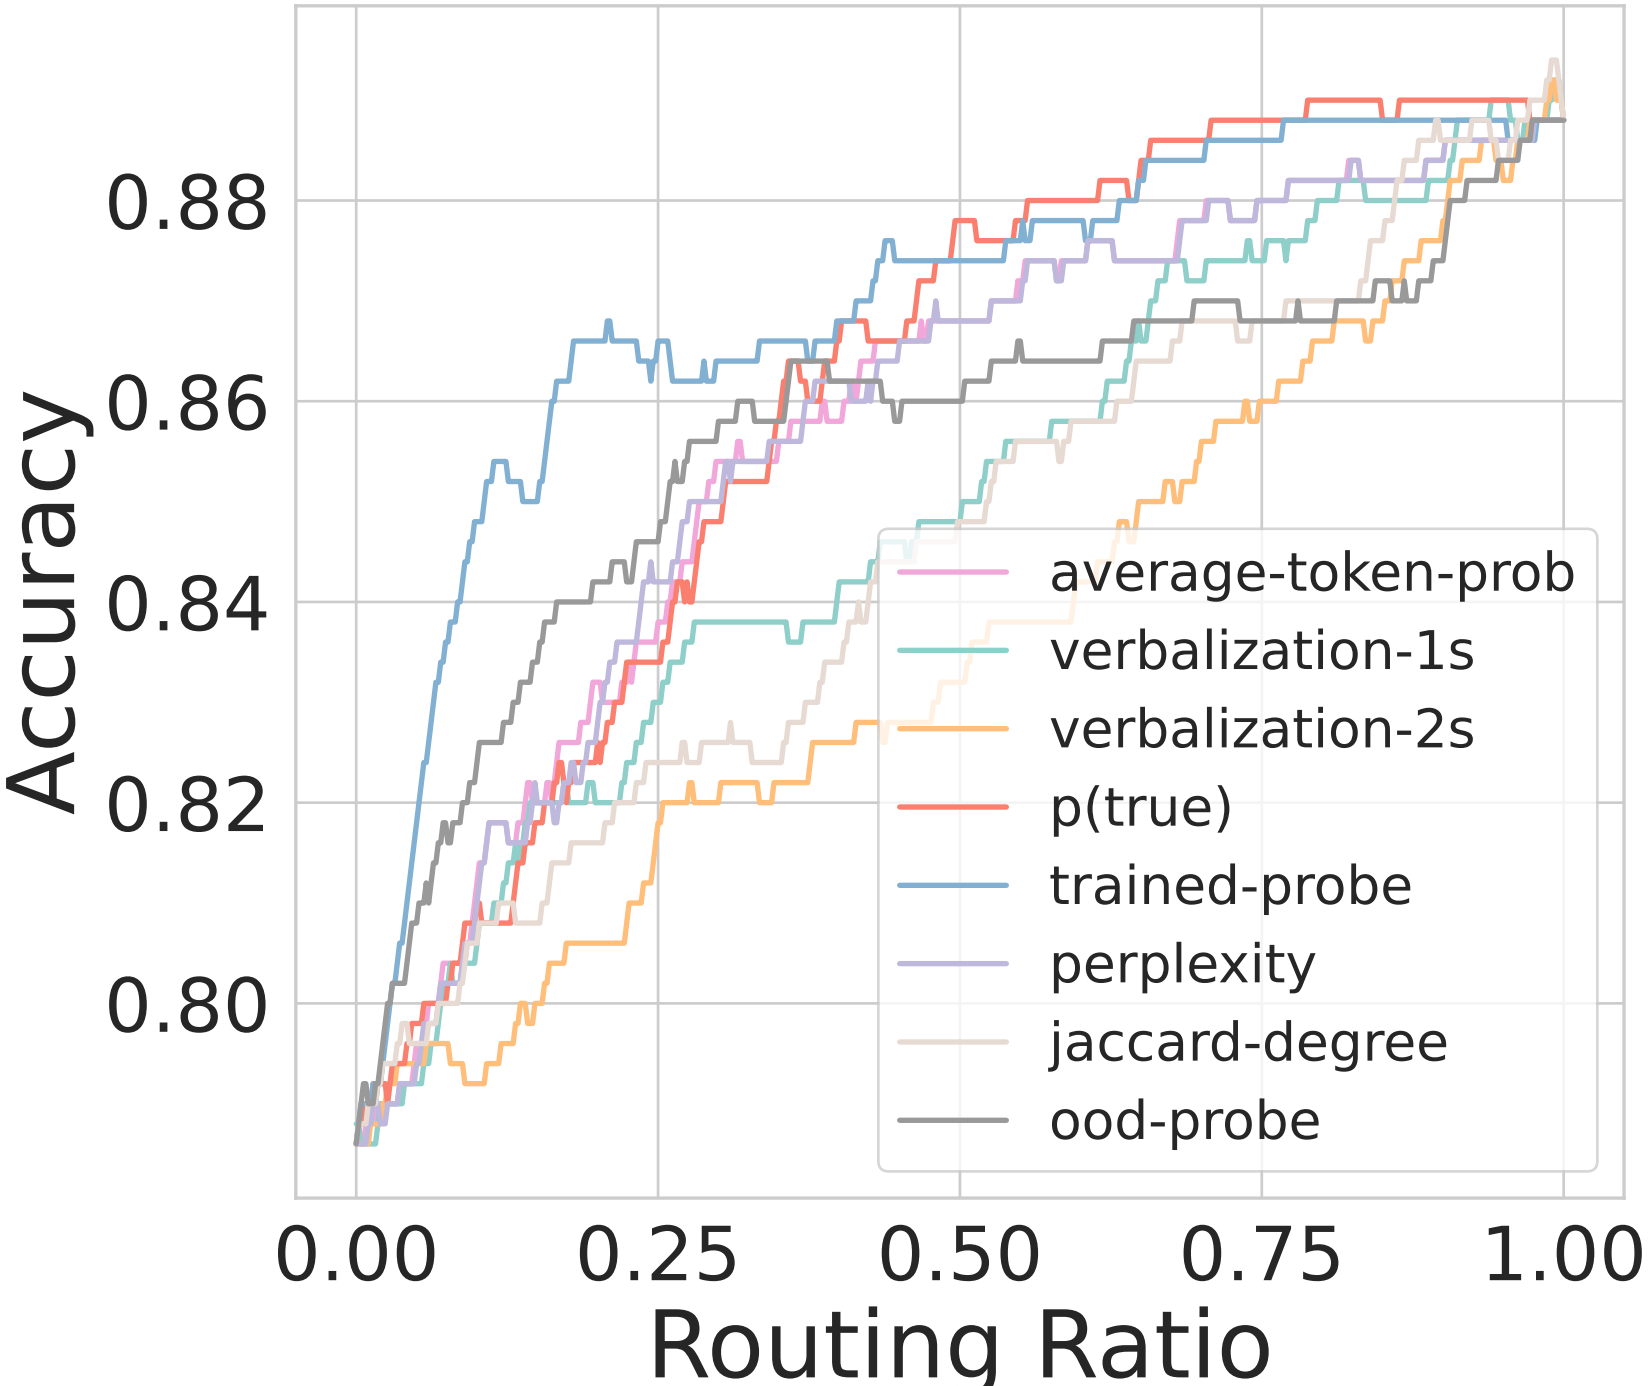

Supplement: supplementary_material [file rr_acc_boolq_mistral-7b_gpt41.pdf › Routing_SLM_LLMs/Uncertainty-based Routing/w_legend/to_gpt41/rr_acc_boolq_mistral-7b_gpt41.pdf]

**BoolQ, phi-3.5-mini to GPT-4.1 mini**

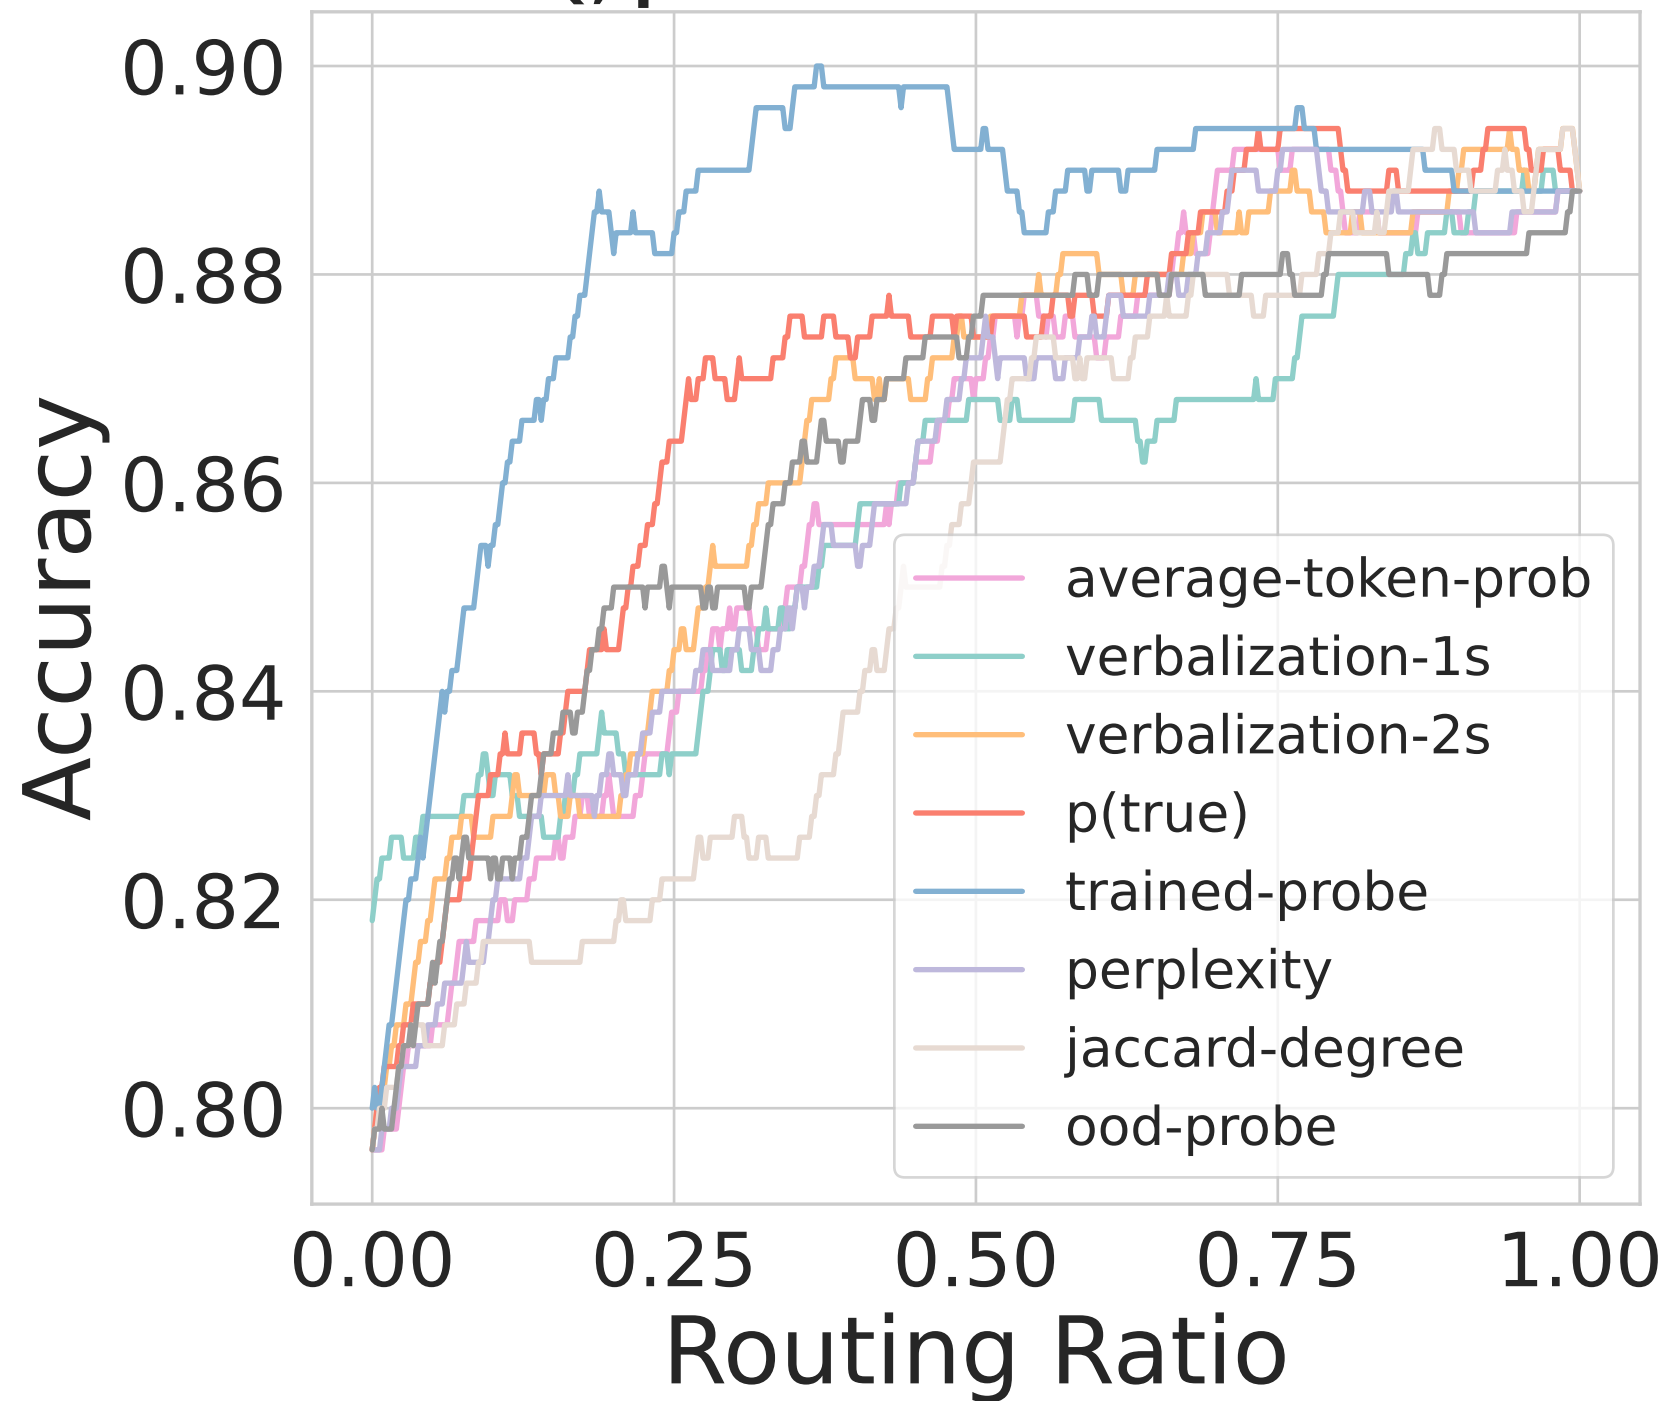

Supplement: supplementary_material [file rr_acc_boolq_phi-3.5-mini_gpt41.pdf › Routing_SLM_LLMs/Uncertainty-based Routing/w_legend/to_gpt41/rr_acc_boolq_phi-3.5-mini_gpt41.pdf]

# BoolQ, phi-4-mini-reasoning to GPT-4.1 mini

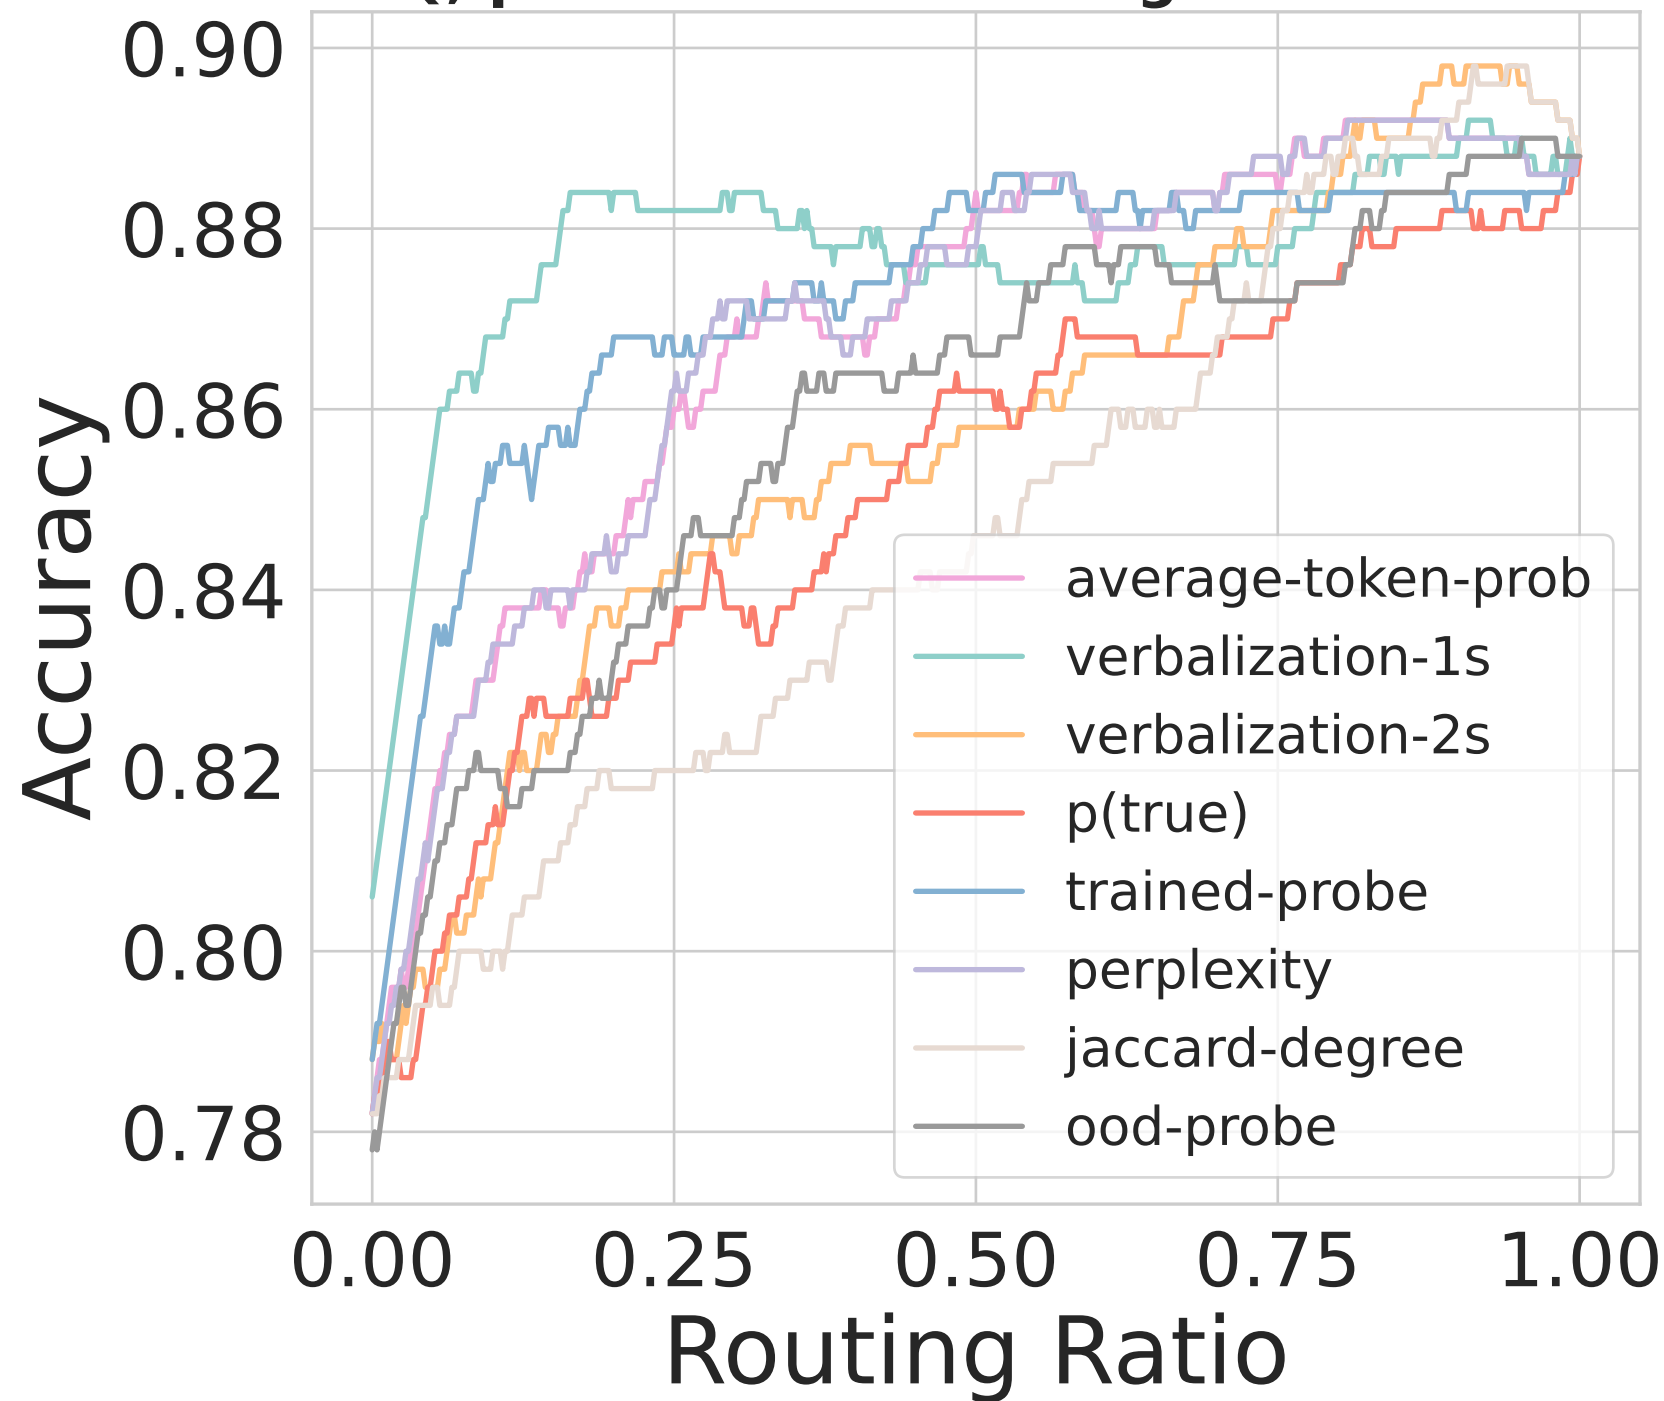

Supplement: supplementary_material [file rr_acc_boolq_phi-4-mini-reasoning_gpt41.pdf › Routing_SLM_LLMs/Uncertainty-based Routing/w_legend/to_gpt41/rr_acc_boolq_phi-4-mini-reasoning_gpt41.pdf]

**BoolQ, qwen-2.5-7b to GPT-4.1 mini**

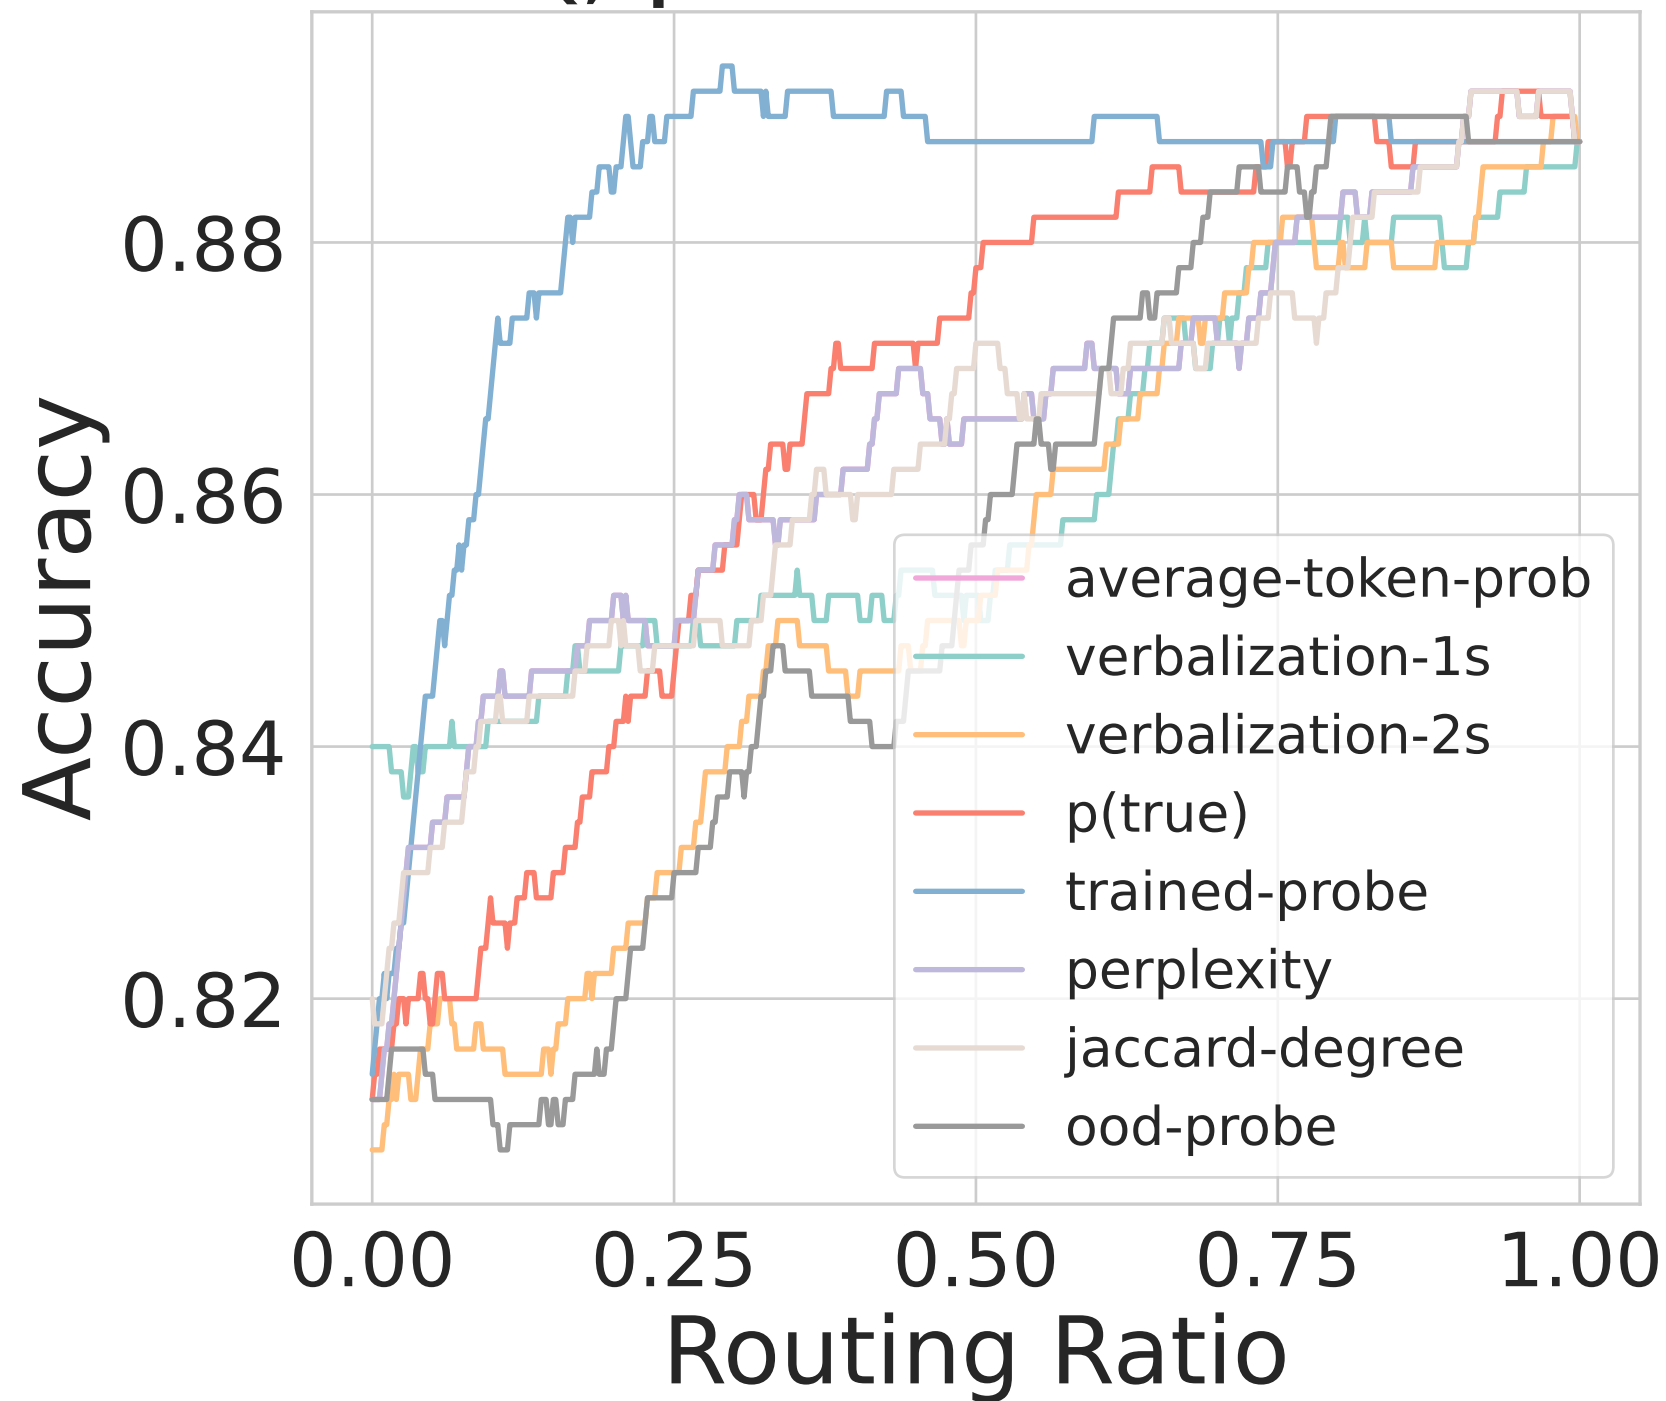

Supplement: supplementary_material [file rr_acc_boolq_qwen-2.5-7b_gpt41.pdf › Routing_SLM_LLMs/Uncertainty-based Routing/w_legend/to_gpt41/rr_acc_boolq_qwen-2.5-7b_gpt41.pdf]

## BoolQ, rwkv to GPT-4.1 mini

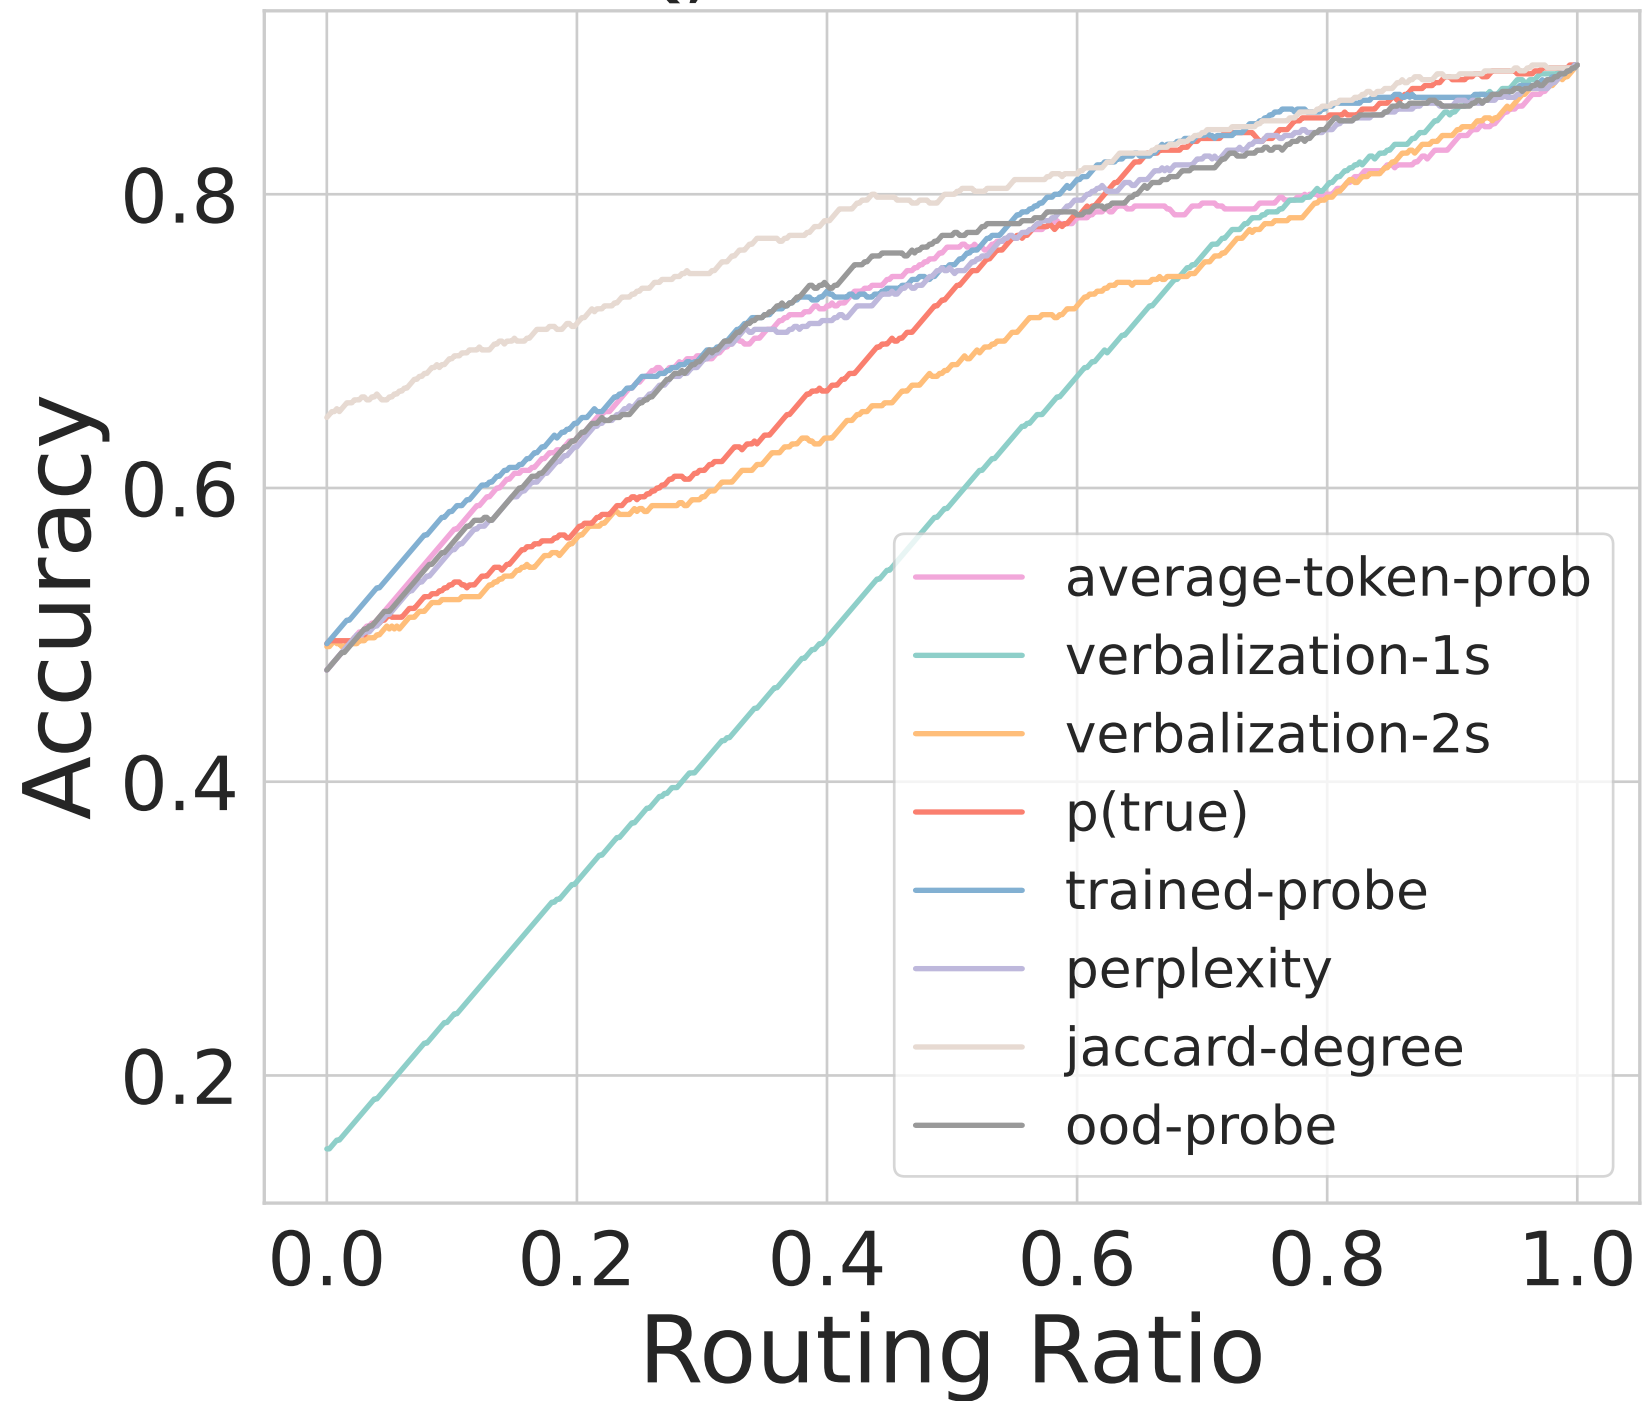

Supplement: supplementary_material [file rr_acc_boolq_rwkv_gpt41.pdf › Routing_SLM_LLMs/Uncertainty-based Routing/w_legend/to_gpt41/rr_acc_boolq_rwkv_gpt41.pdf]

## CoQA, Qwen3-0.6B to GPT-4.1 mini

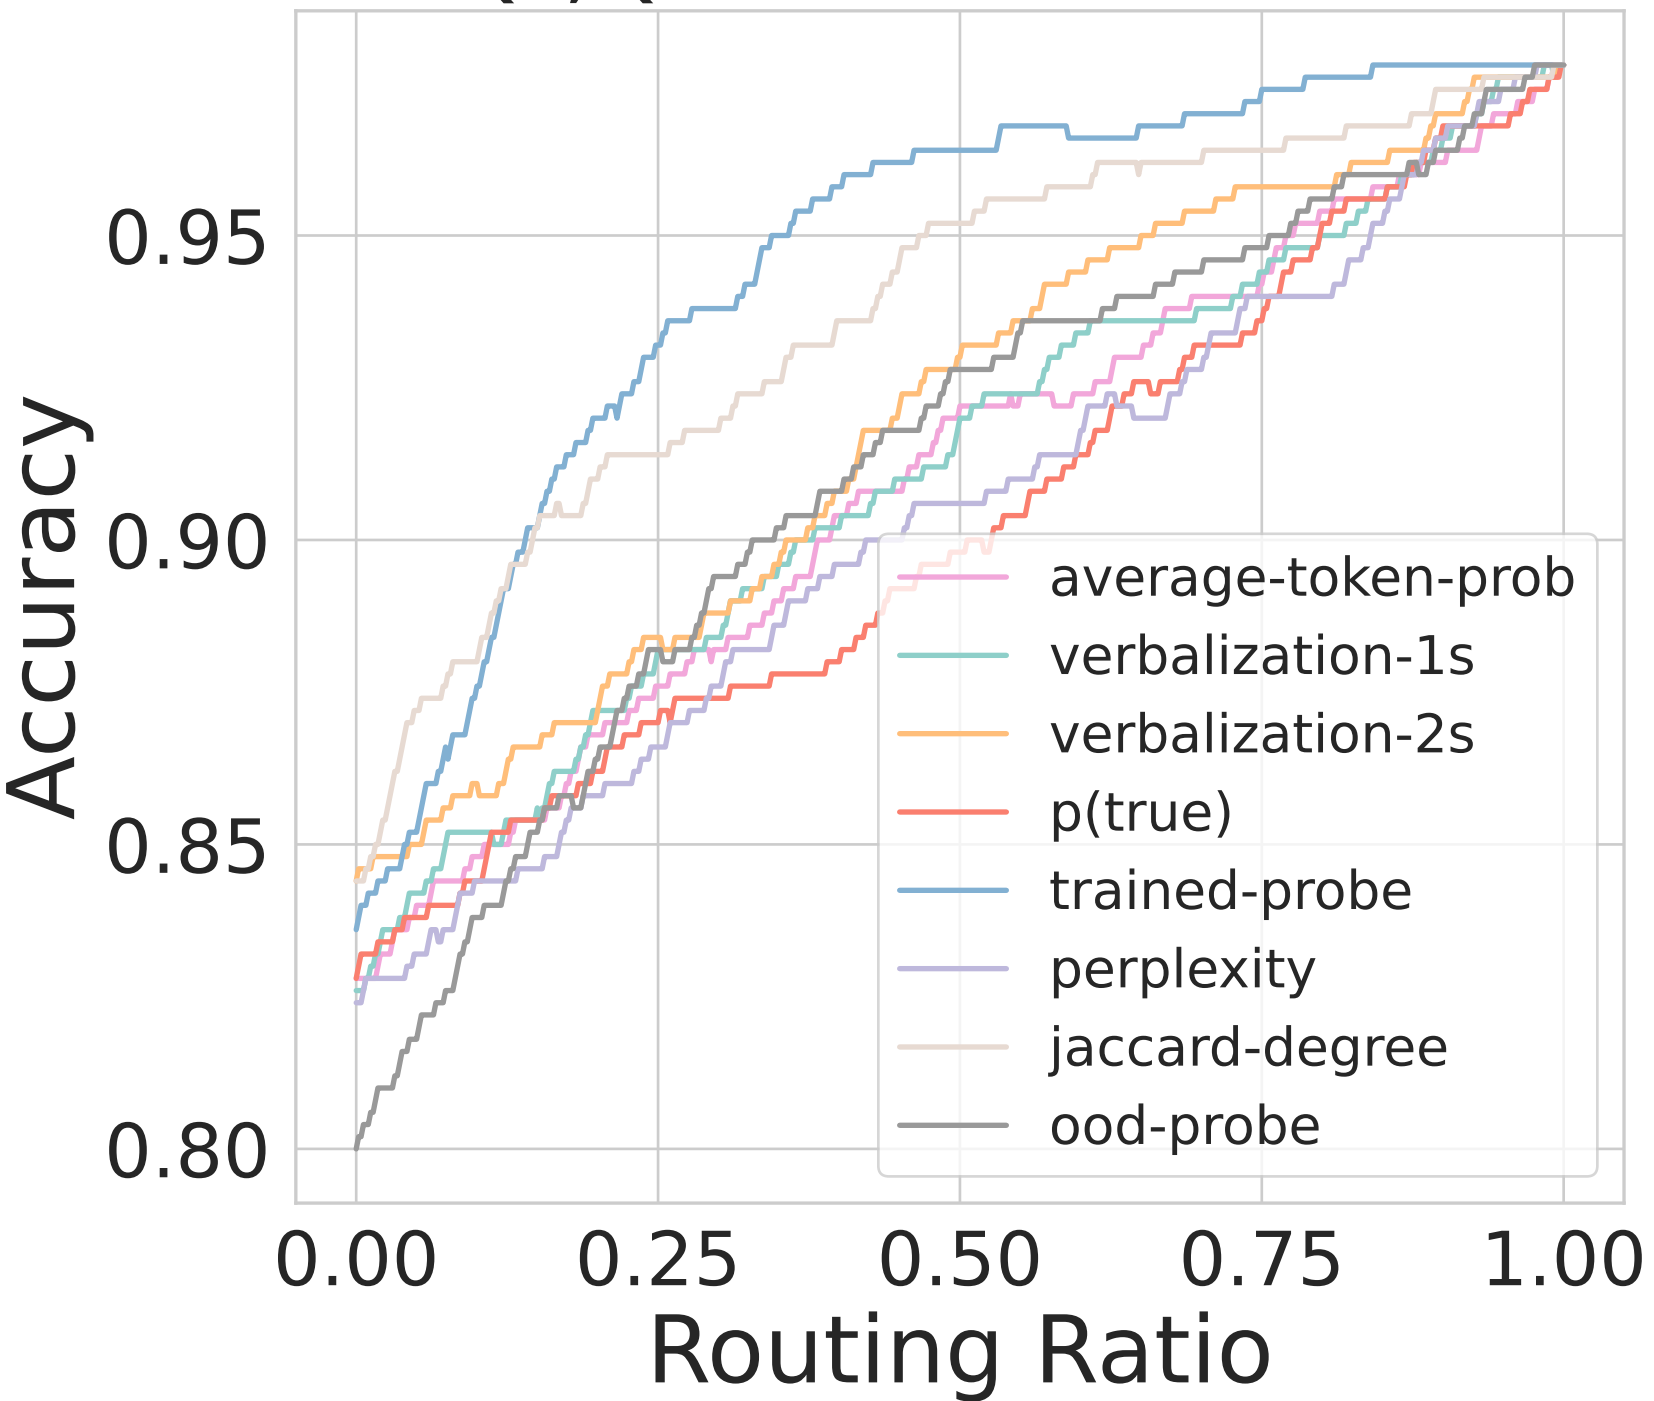

Supplement: supplementary_material [file rr_acc_co_qa_Qwen3-0.6B_gpt41.pdf › Routing_SLM_LLMs/Uncertainty-based Routing/w_legend/to_gpt41/rr_acc_co_qa_Qwen3-0.6B_gpt41.pdf]

CoQA, Qwen3-1.7B to GPT-4.1 mini

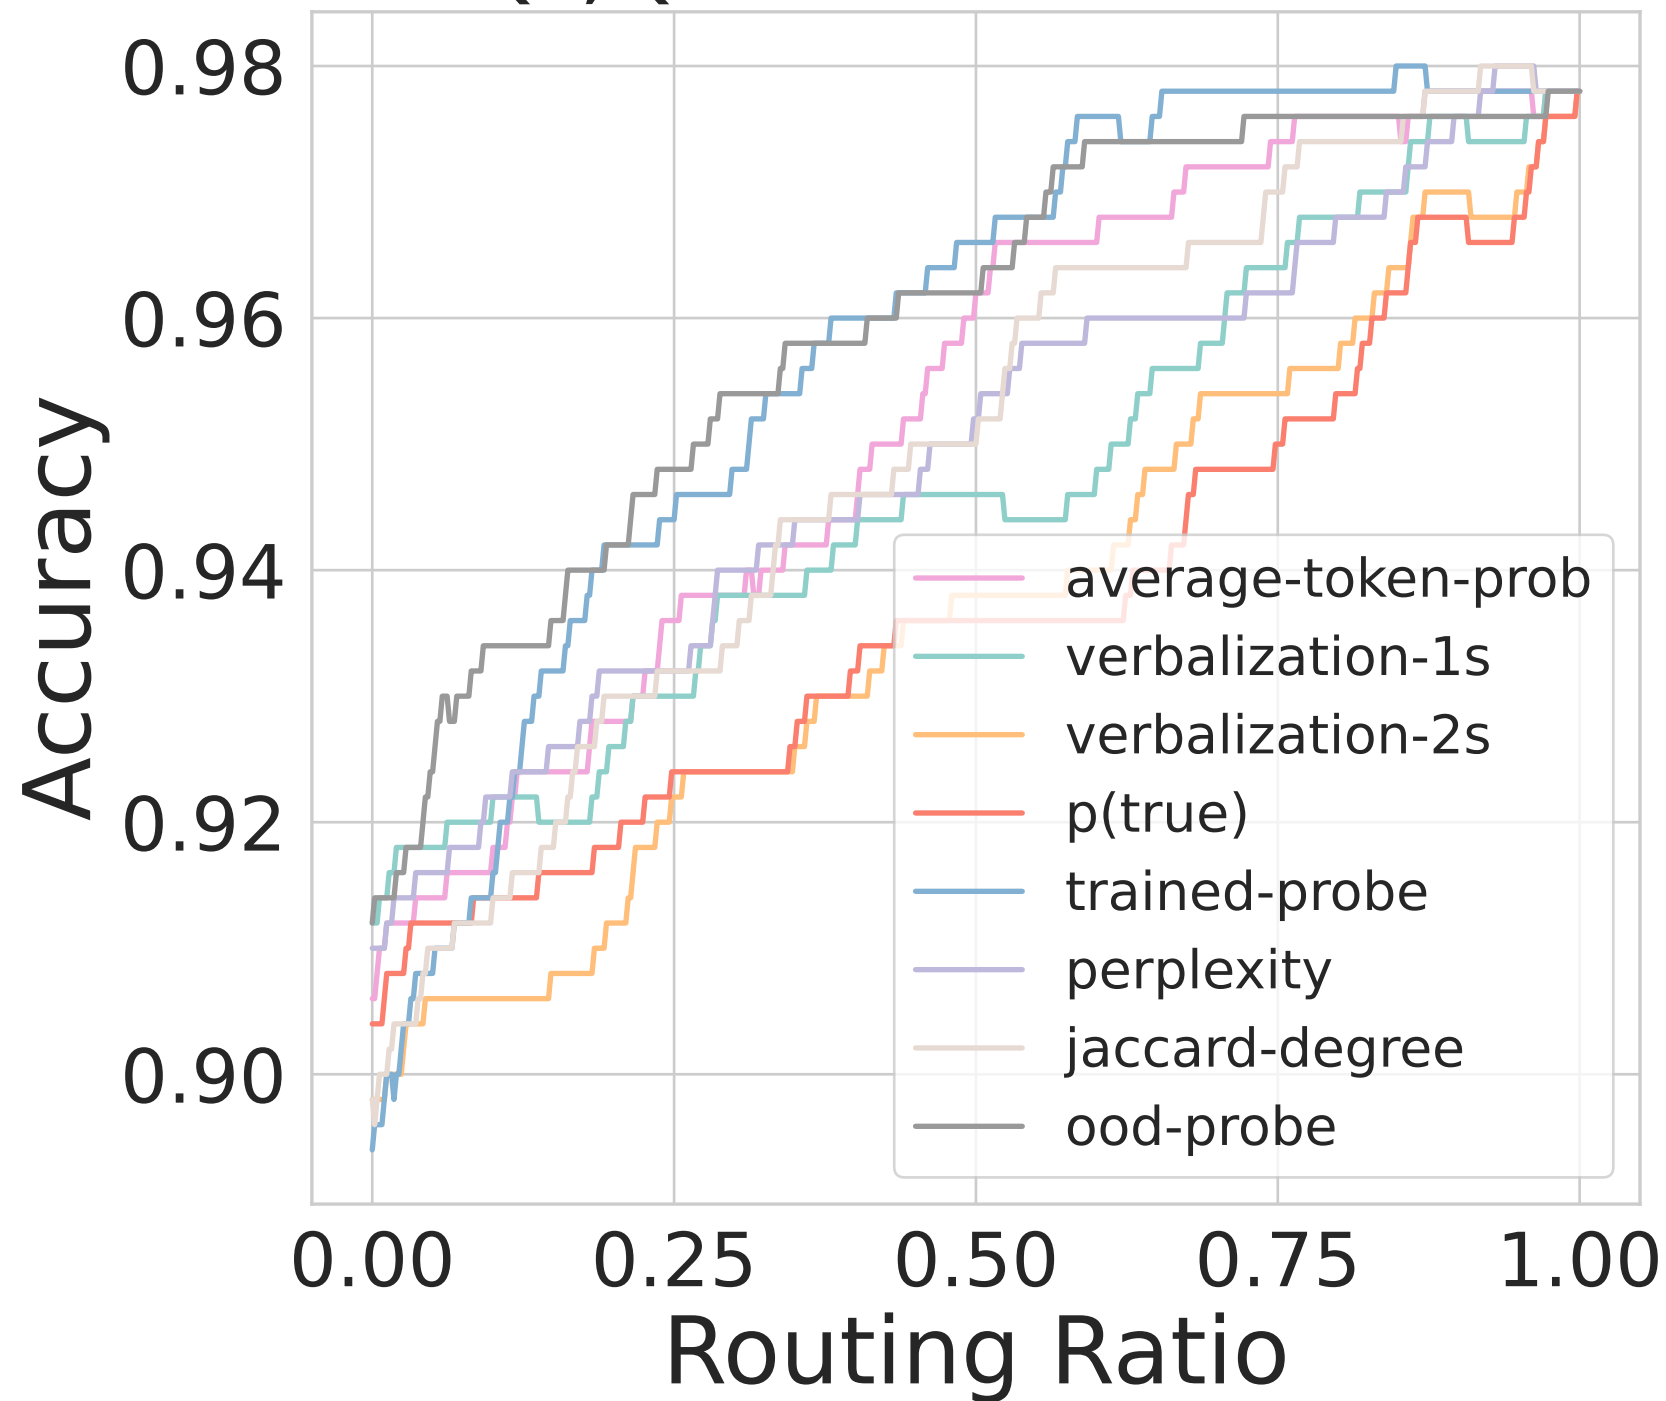

Supplement: supplementary_material [file rr_acc_co_qa_Qwen3-1.7B_gpt41.pdf › Routing_SLM_LLMs/Uncertainty-based Routing/w_legend/to_gpt41/rr_acc_co_qa_Qwen3-1.7B_gpt41.pdf]

## CoQA, Qwen3-4B to GPT-4.1 mini

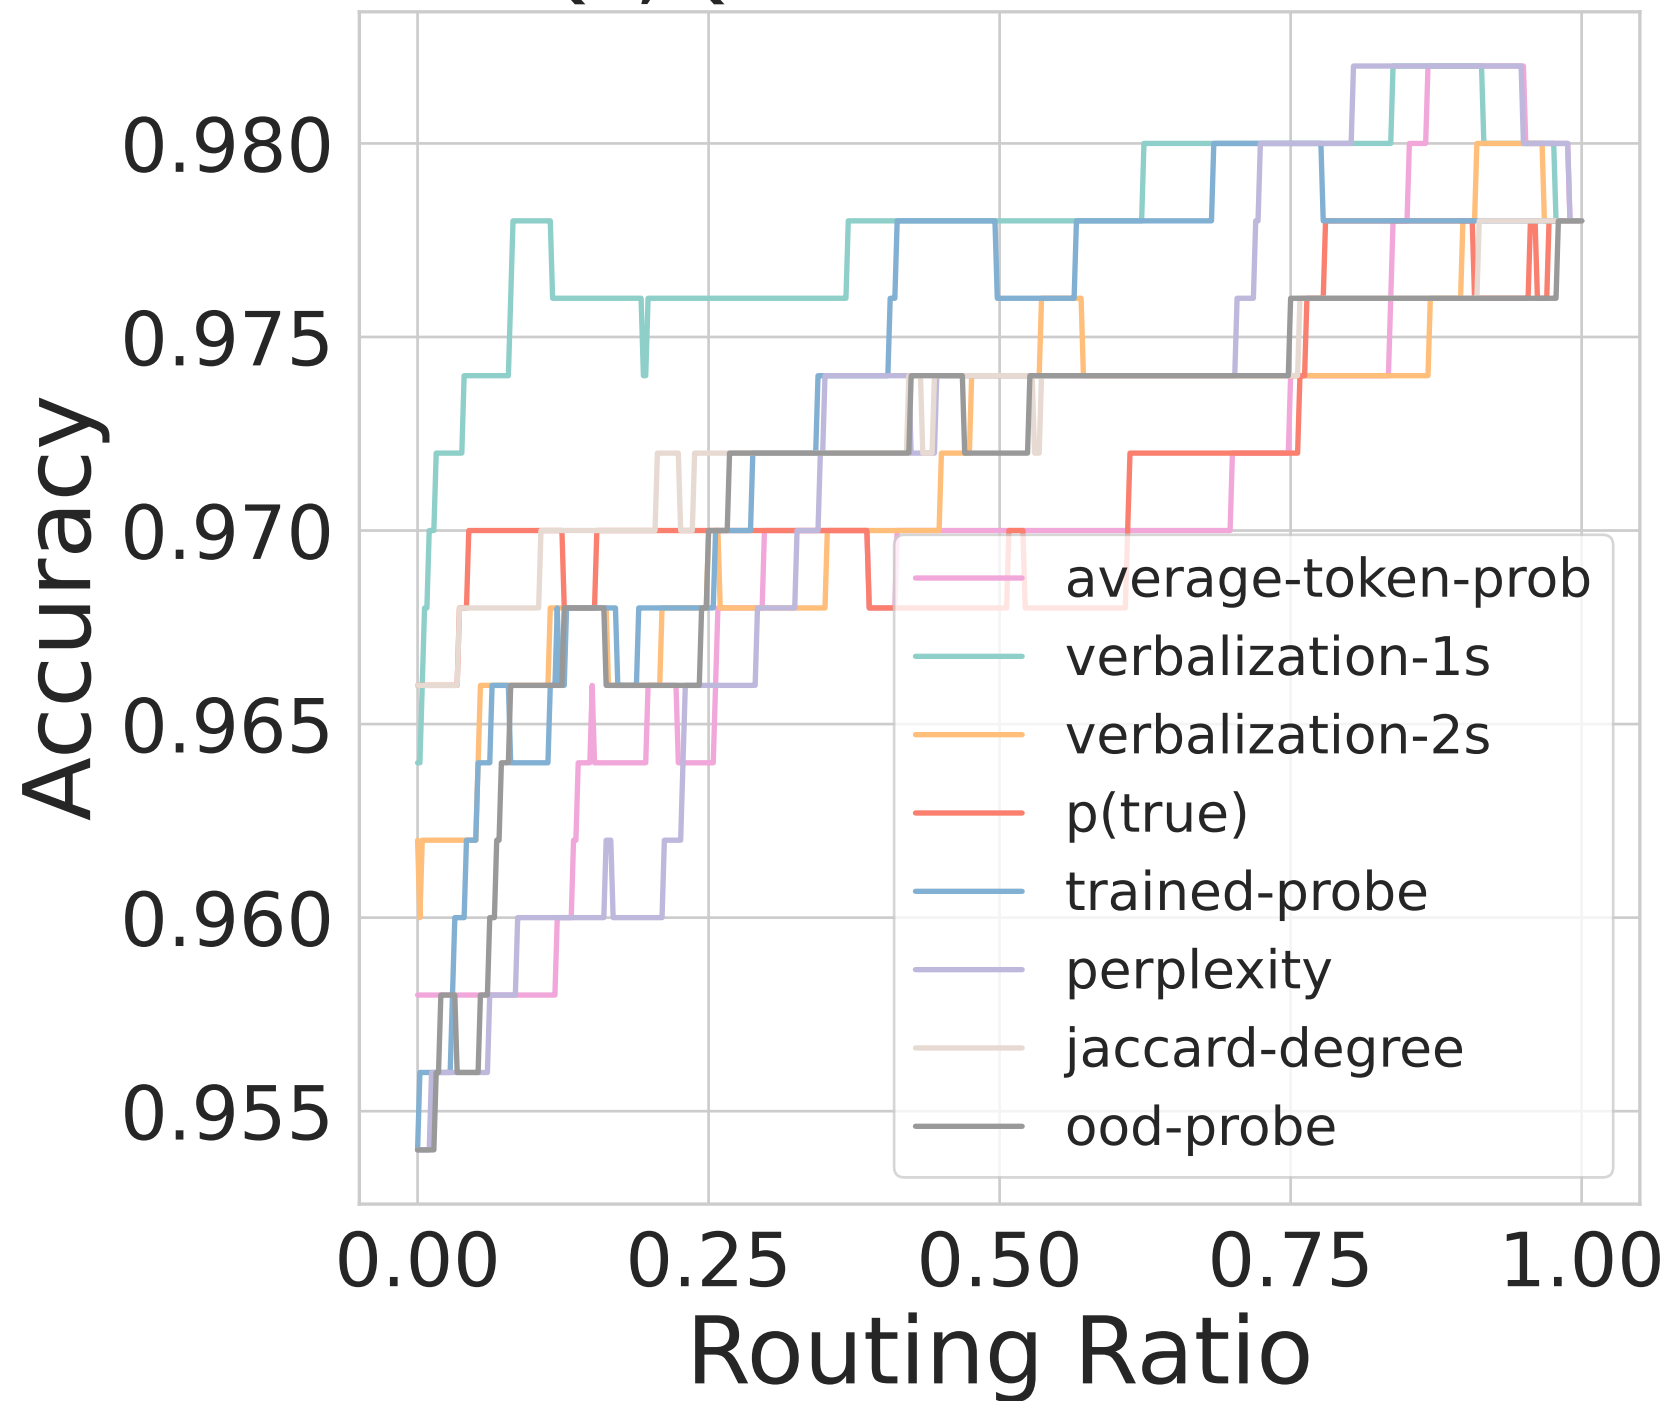

Supplement: supplementary_material [file rr_acc_co_qa_Qwen3-4B_gpt41.pdf › Routing_SLM_LLMs/Uncertainty-based Routing/w_legend/to_gpt41/rr_acc_co_qa_Qwen3-4B_gpt41.pdf]

CoQA, granite-3.1-8b to GPT-4.1 mini

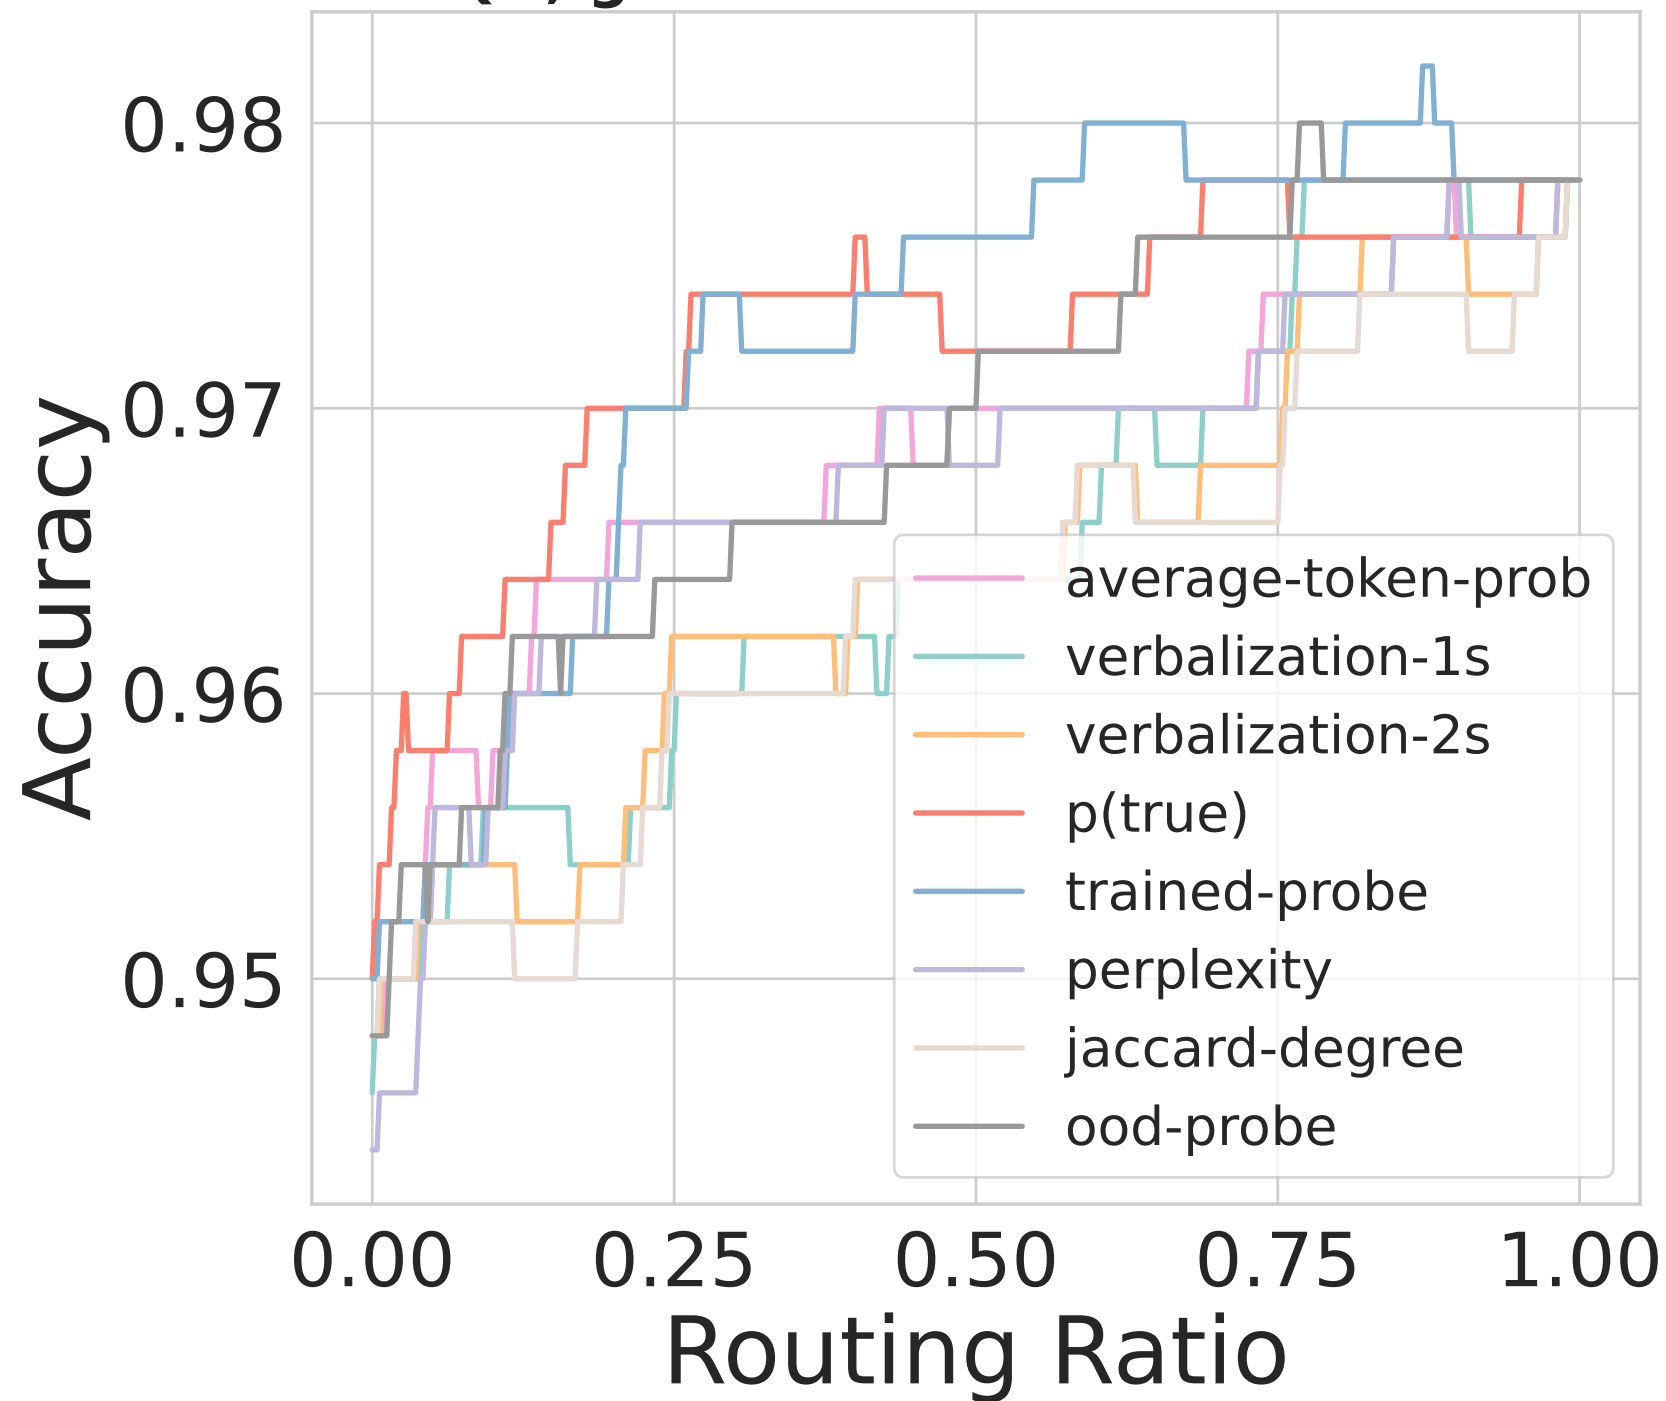

Supplement: supplementary_material [file rr_acc_co_qa_granite-3.1-8b_gpt41.pdf › Routing_SLM_LLMs/Uncertainty-based Routing/w_legend/to_gpt41/rr_acc_co_qa_granite-3.1-8b_gpt41.pdf]
