# Supplementary material (part 14 of 14)
Source: ML conference proceedings conference paper supplement (https://openreview.net/forum?id=smdbra3VEi)

**PIQA, llama-3.1-8b to Qwen3-32B**

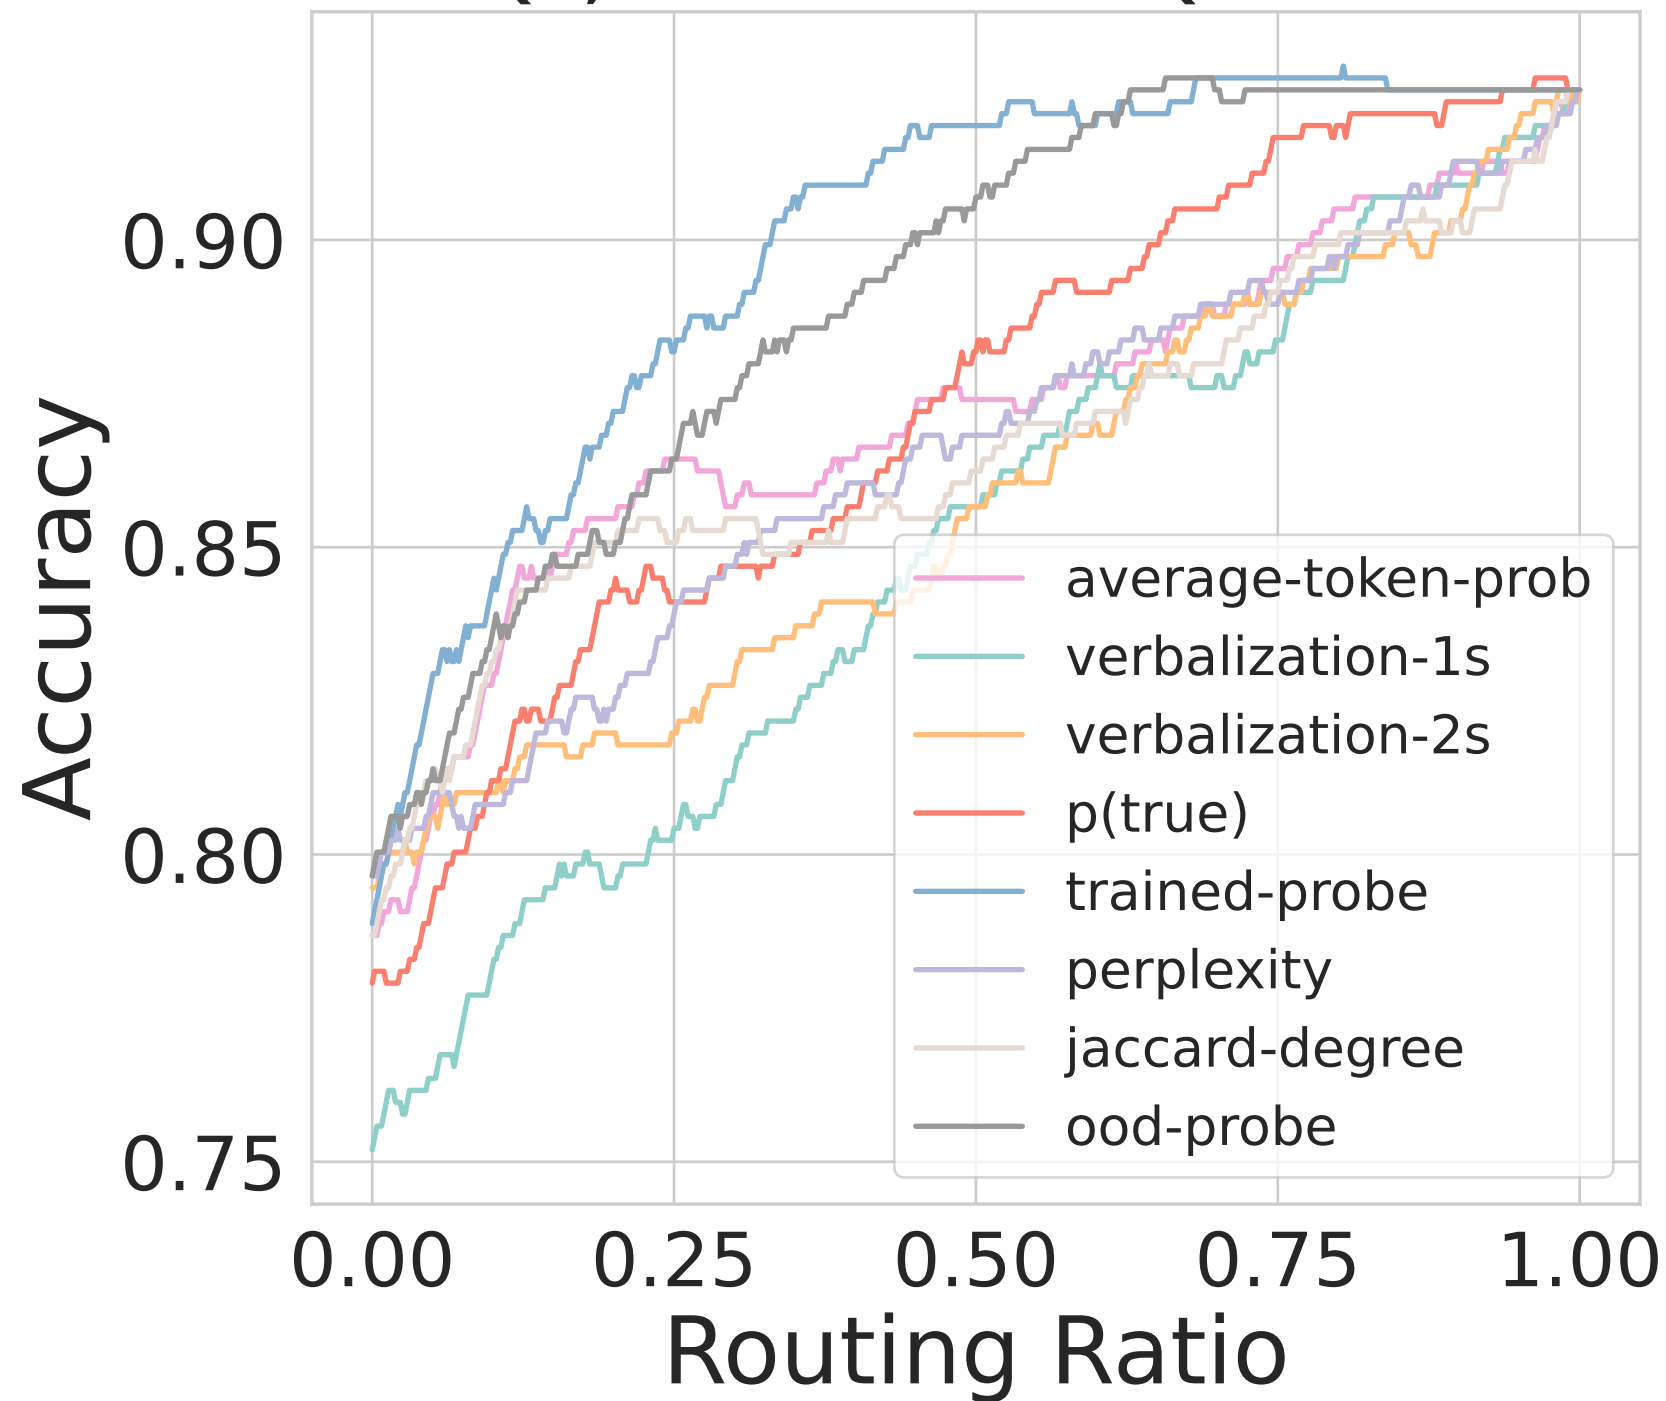

Supplement: supplementary_material [file rr_acc_pi_qa_llama-3.1-8b_qwen32.pdf › Routing_SLM_LLMs/Uncertainty-based Routing/w_legend/to_qwen32/rr_acc_pi_qa_llama-3.1-8b_qwen32.pdf]

## PIQA, llama-3.2-1b to Qwen3-32B

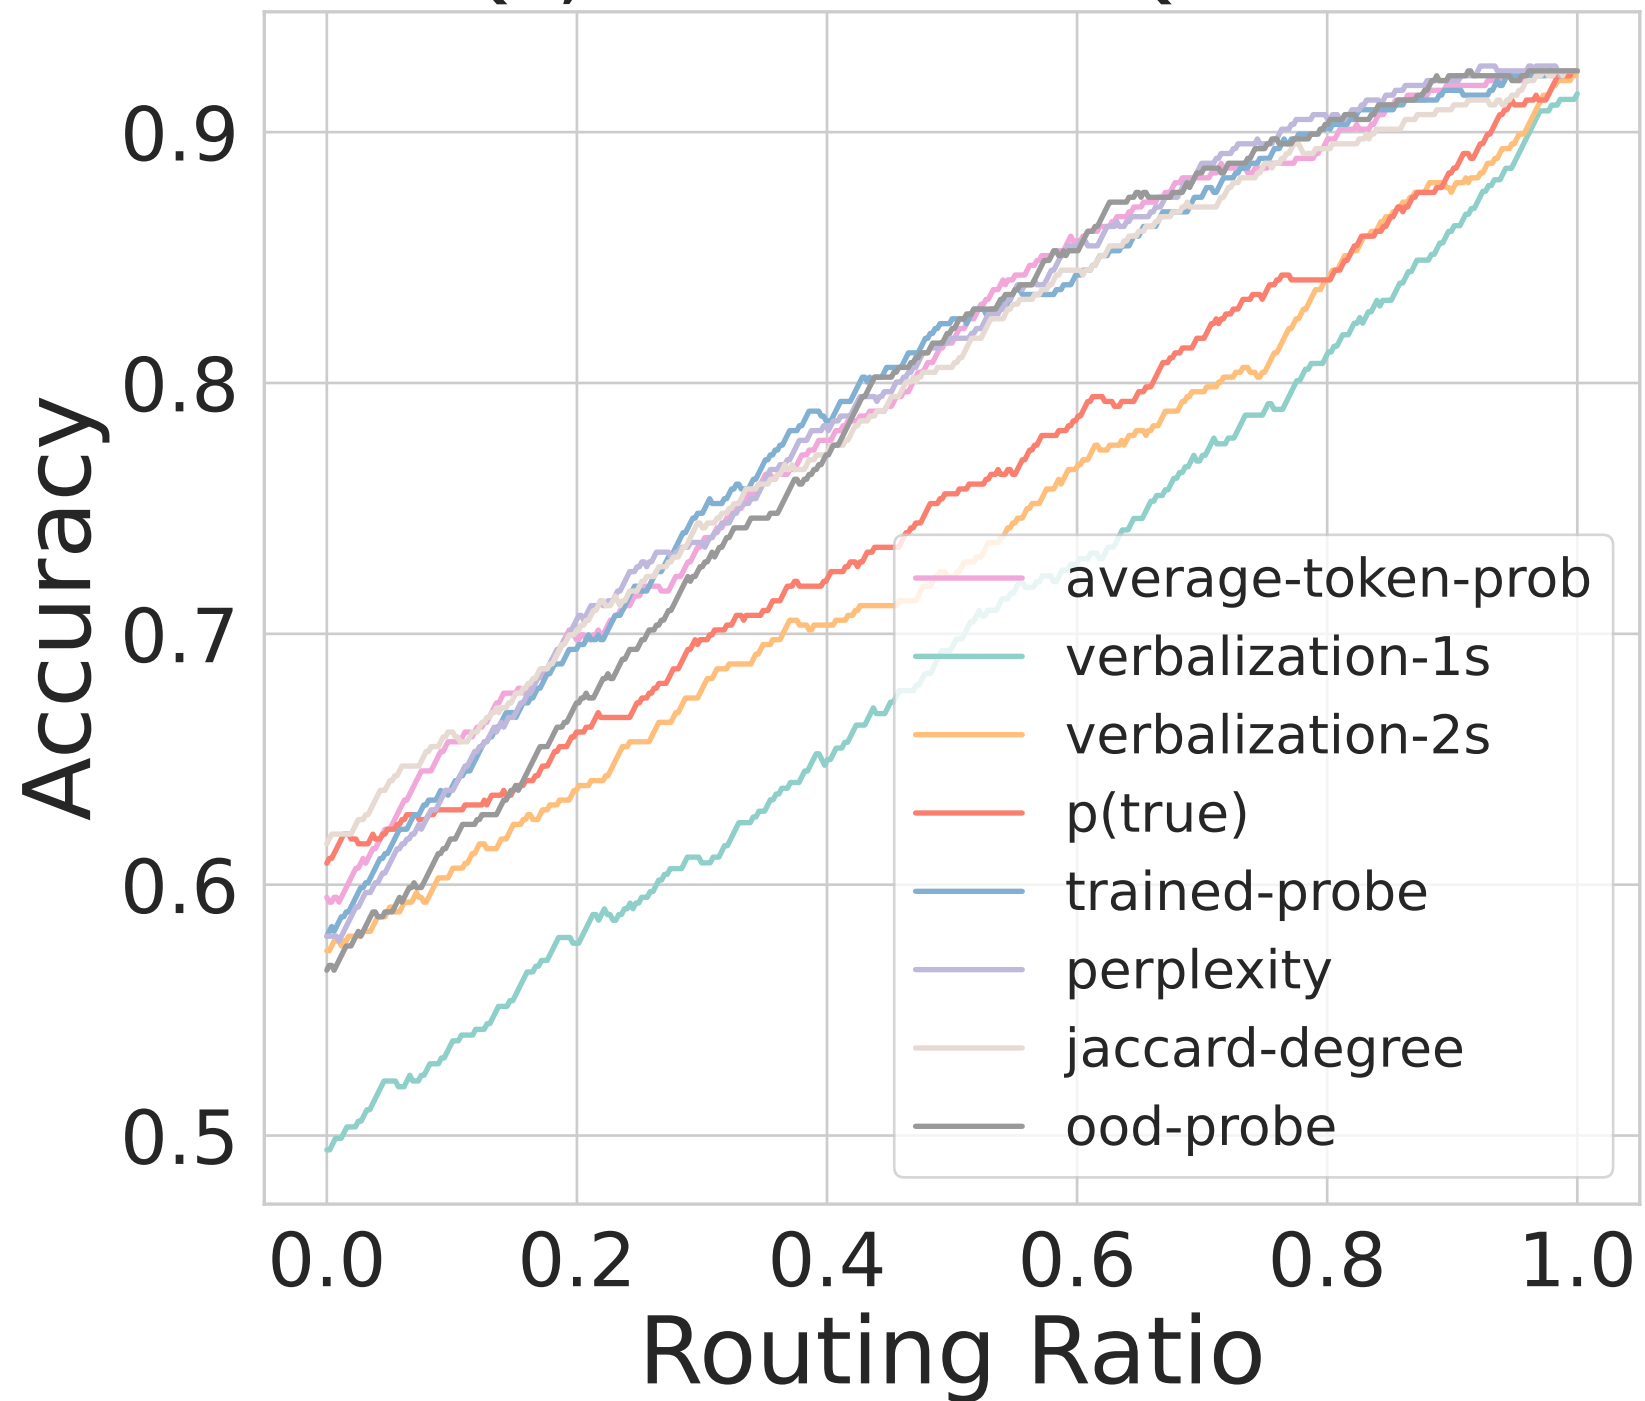

Supplement: supplementary_material [file rr_acc_pi_qa_llama-3.2-1b_qwen32.pdf › Routing_SLM_LLMs/Uncertainty-based Routing/w_legend/to_qwen32/rr_acc_pi_qa_llama-3.2-1b_qwen32.pdf]

# PIQA, llama-3.2-3b to Qwen3-32B

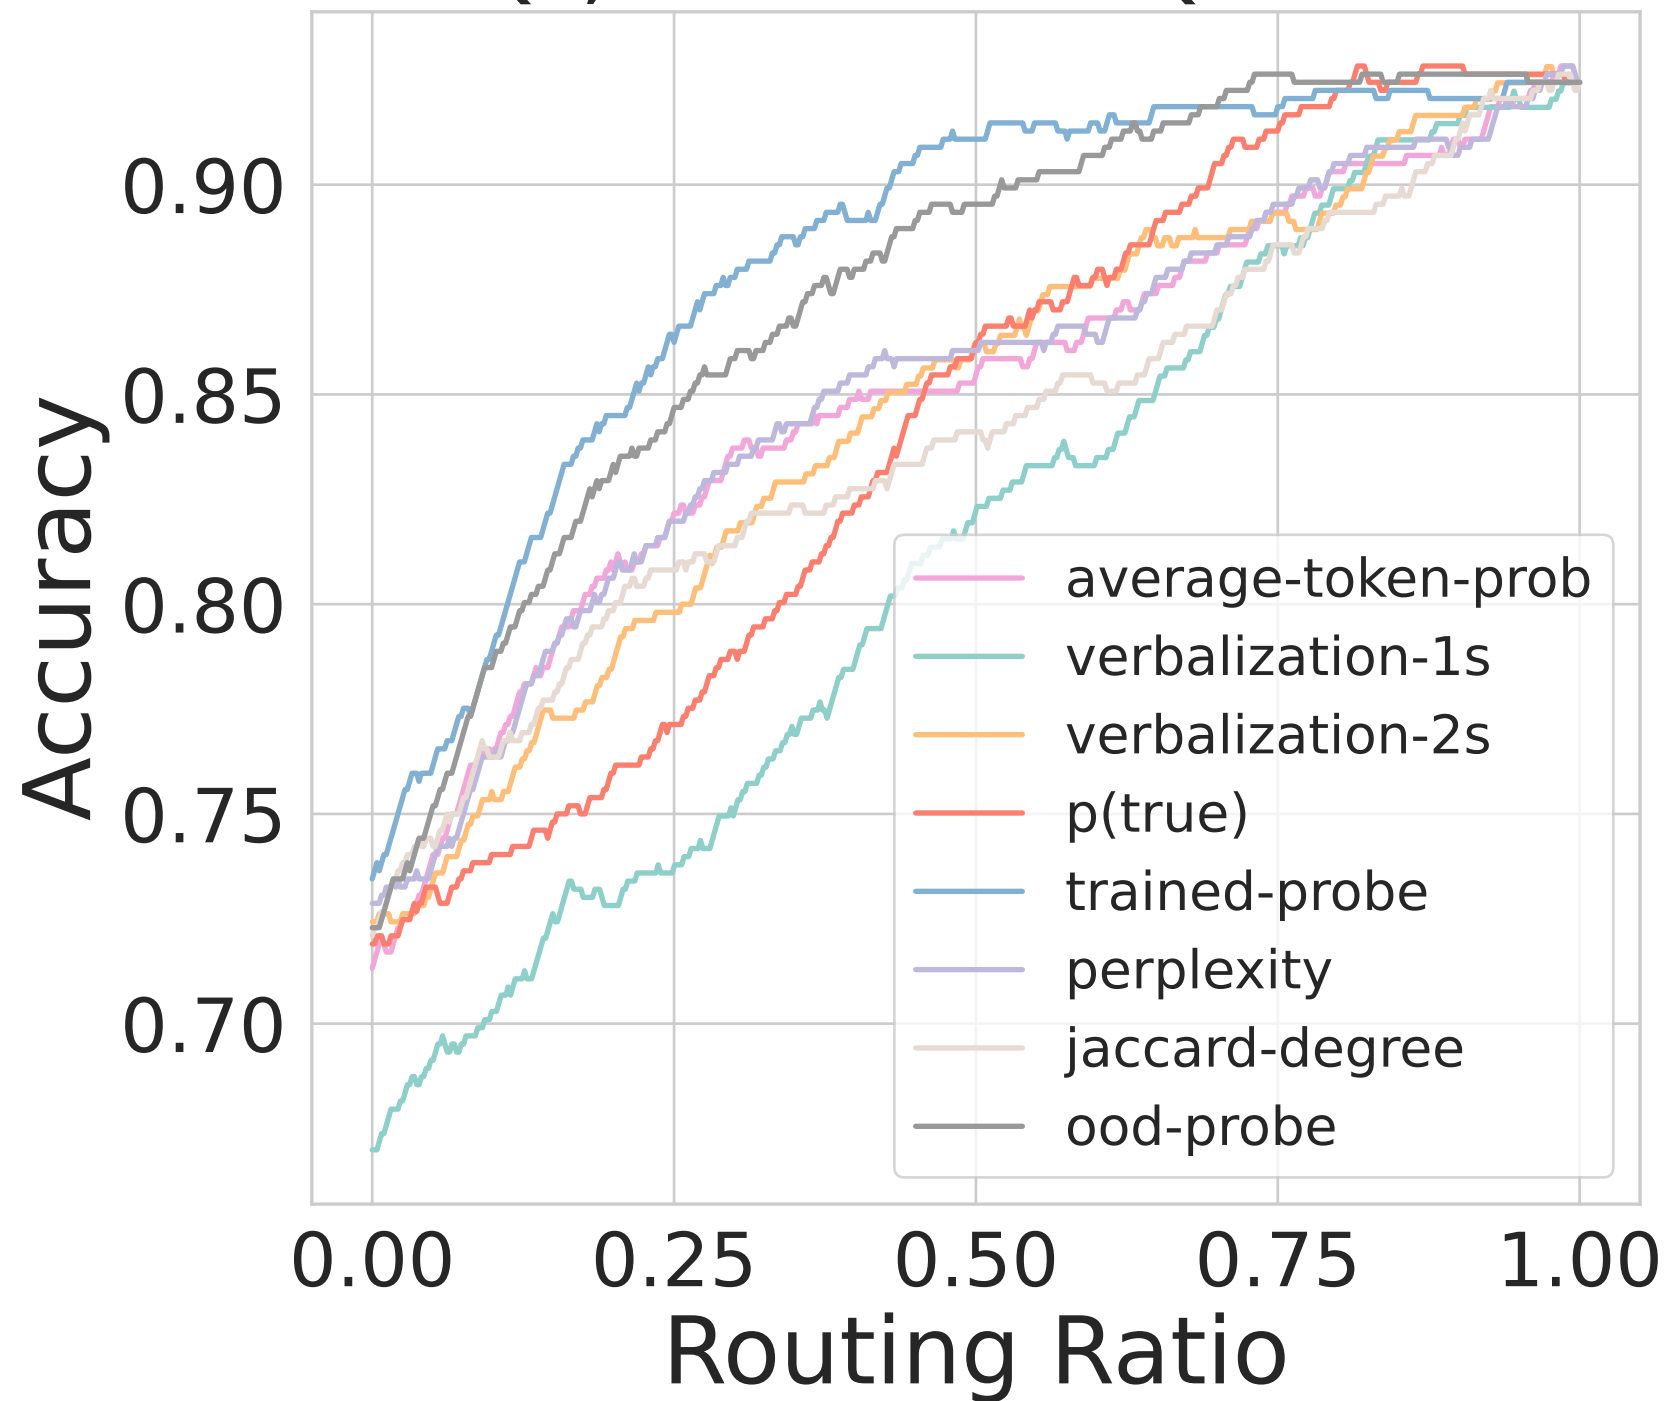

Supplement: supplementary_material [file rr_acc_pi_qa_llama-3.2-3b_qwen32.pdf › Routing_SLM_LLMs/Uncertainty-based Routing/w_legend/to_qwen32/rr_acc_pi_qa_llama-3.2-3b_qwen32.pdf]

**PIQA, mistral-7b to Qwen3-32B**

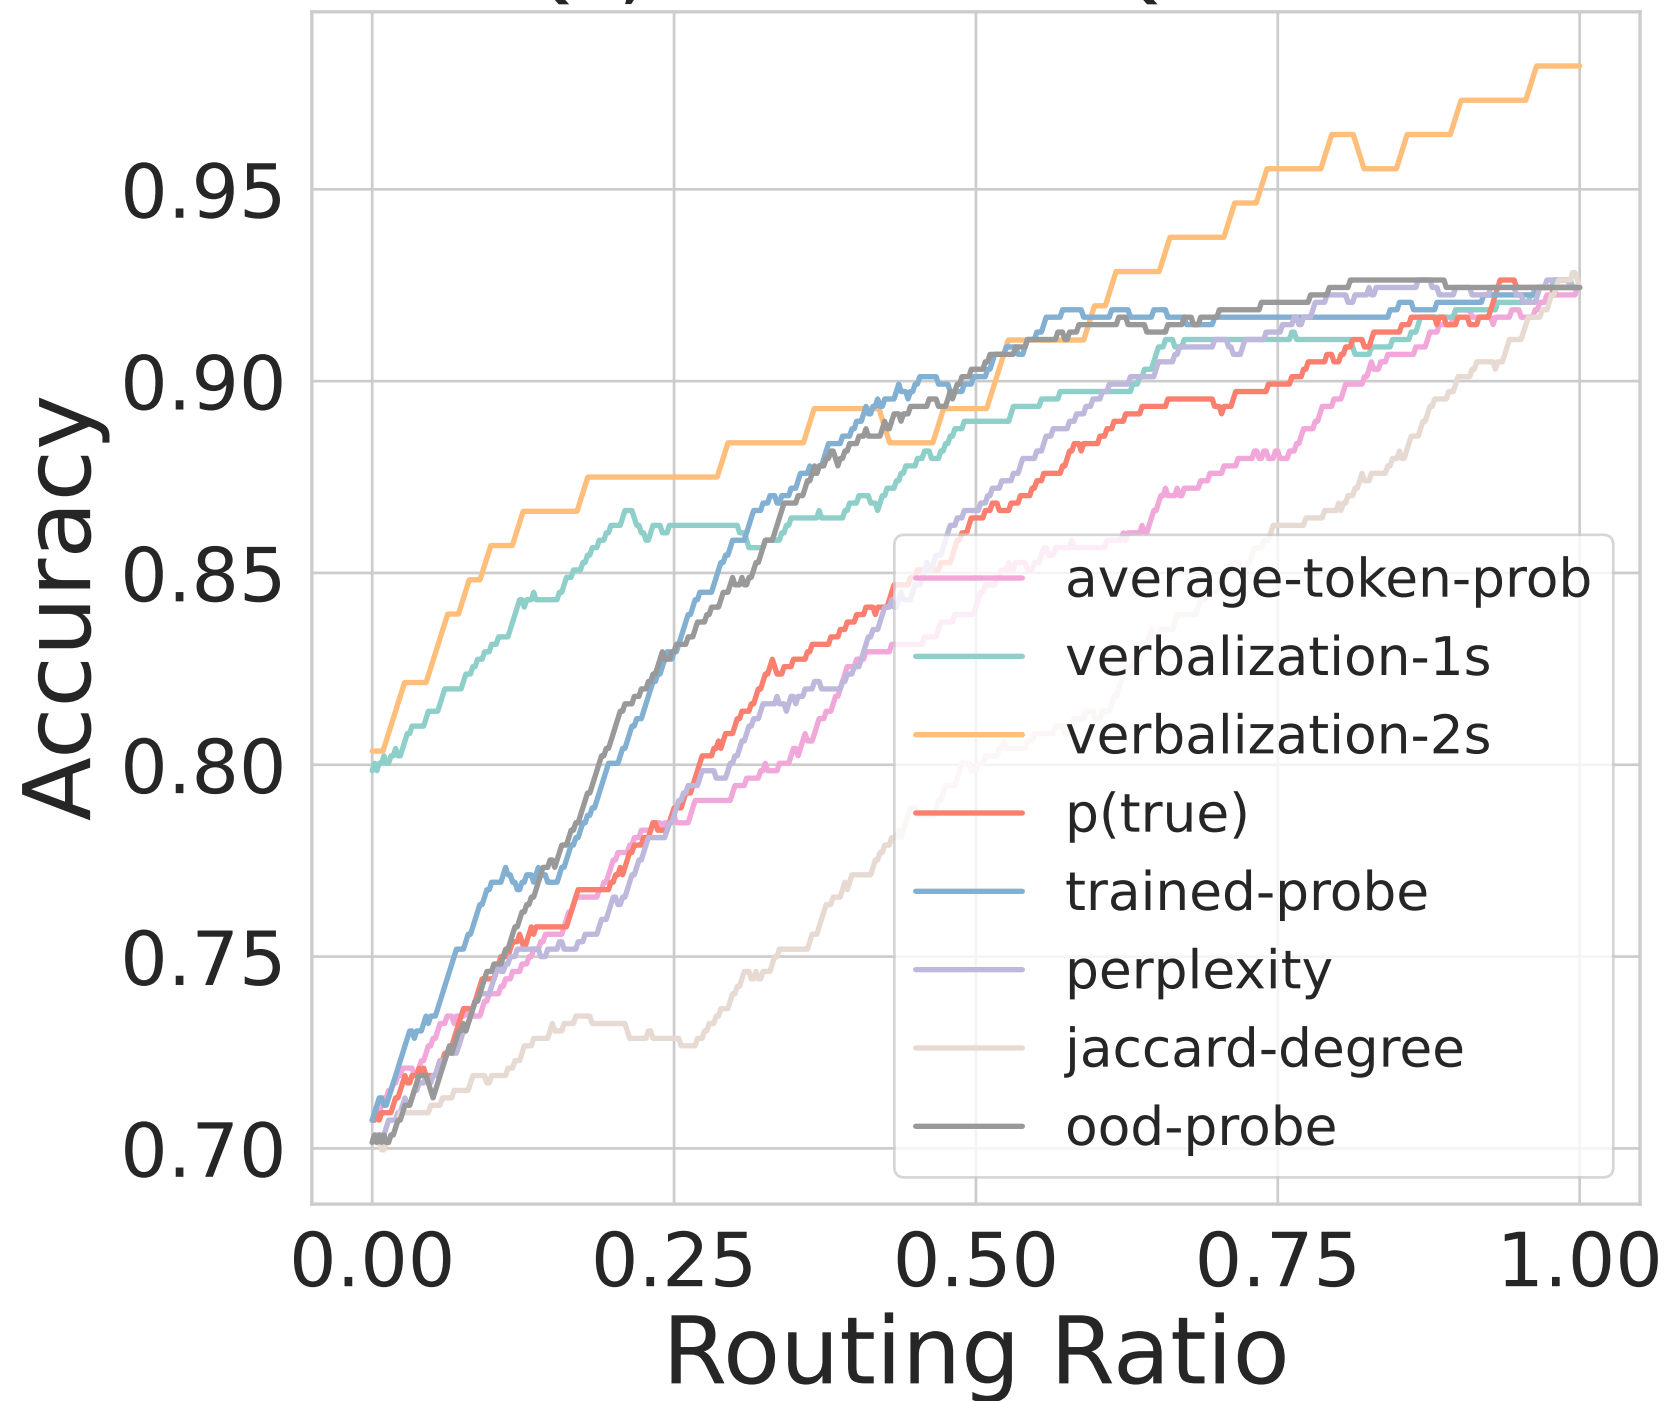

Supplement: supplementary_material [file rr_acc_pi_qa_mistral-7b_qwen32.pdf › Routing_SLM_LLMs/Uncertainty-based Routing/w_legend/to_qwen32/rr_acc_pi_qa_mistral-7b_qwen32.pdf]

**PIQA, phi-3.5-mini to Qwen3-32B**

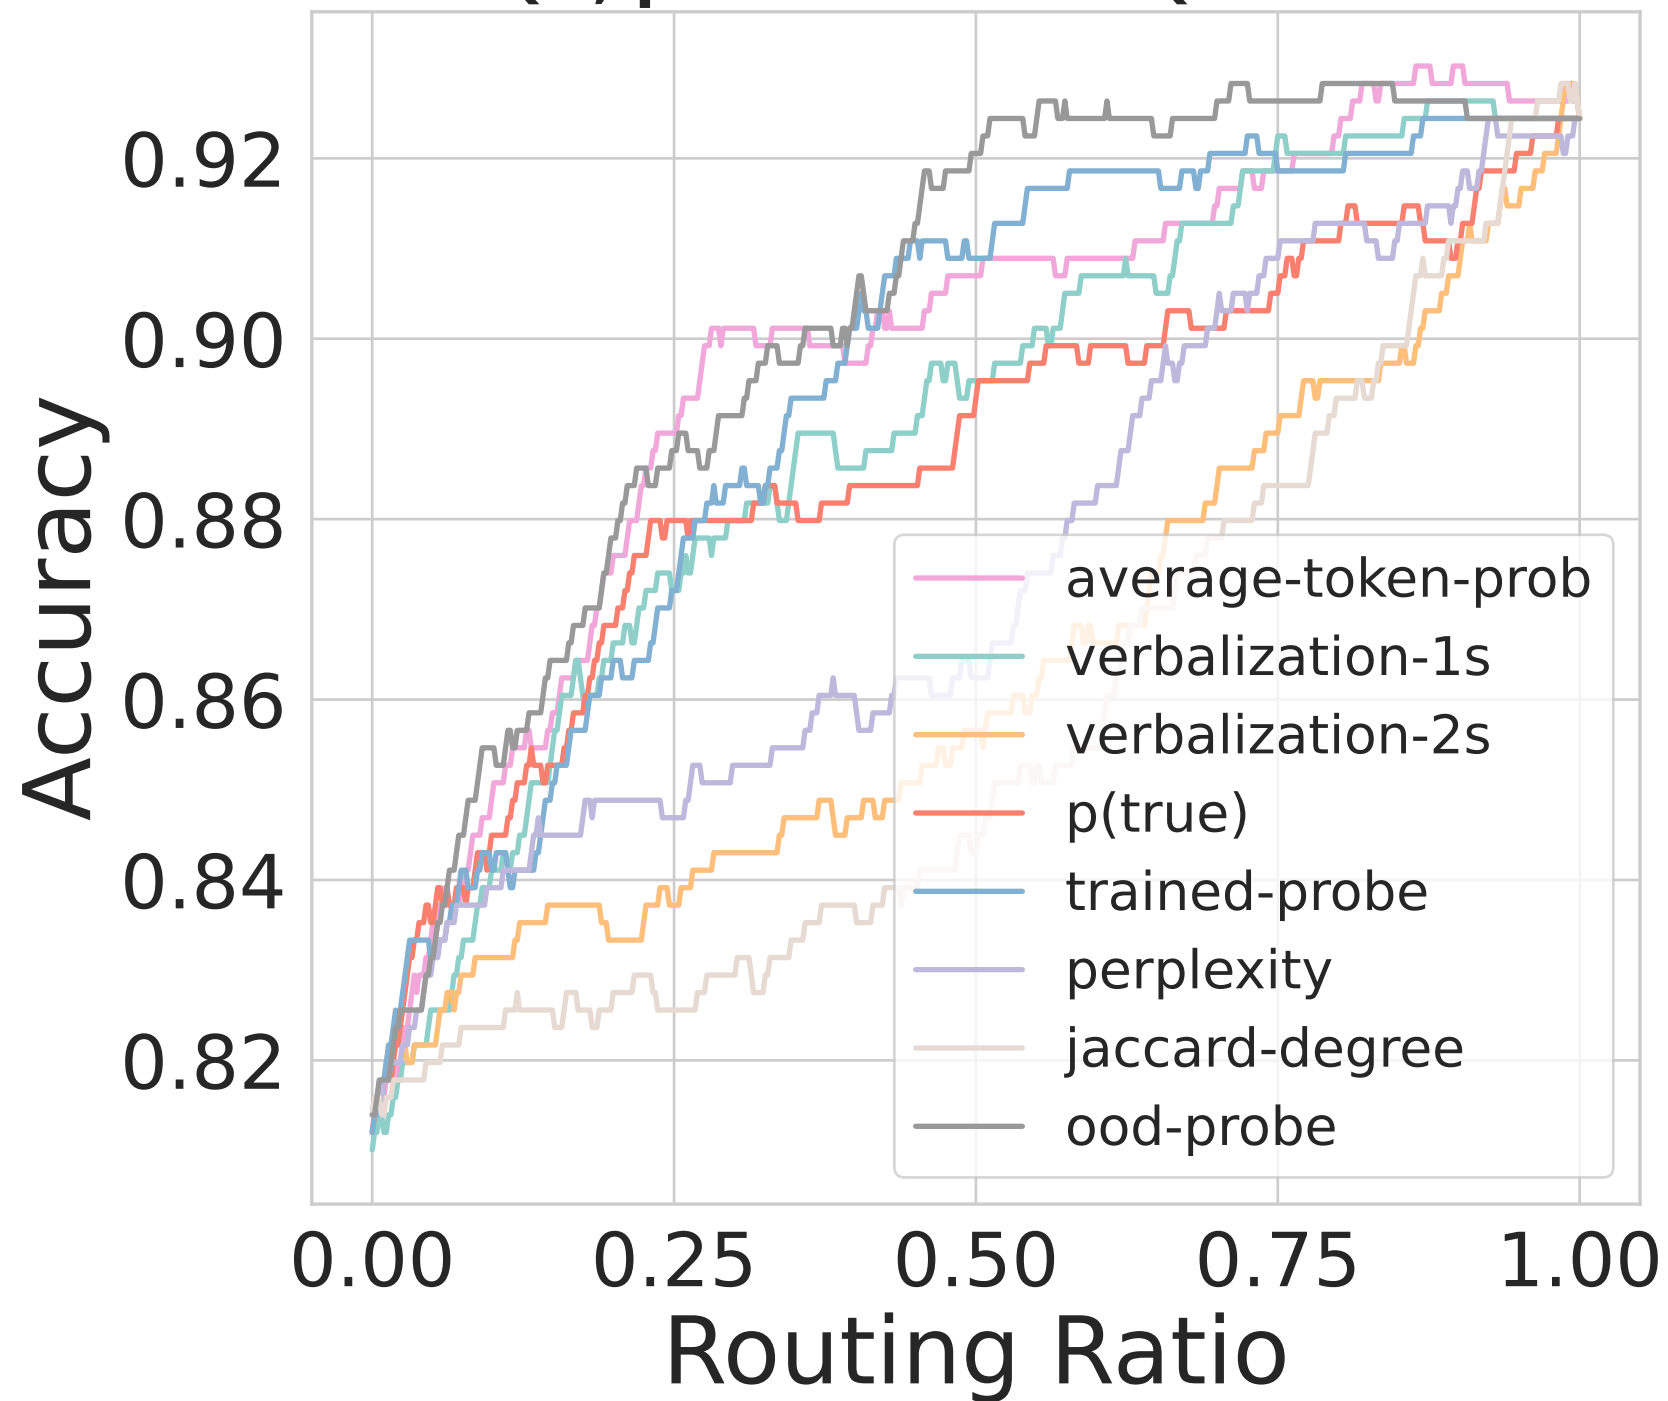

Supplement: supplementary_material [file rr_acc_pi_qa_phi-3.5-mini_qwen32.pdf › Routing_SLM_LLMs/Uncertainty-based Routing/w_legend/to_qwen32/rr_acc_pi_qa_phi-3.5-mini_qwen32.pdf]

# PIQA, phi-4-mini-reasoning to Qwen3-32B

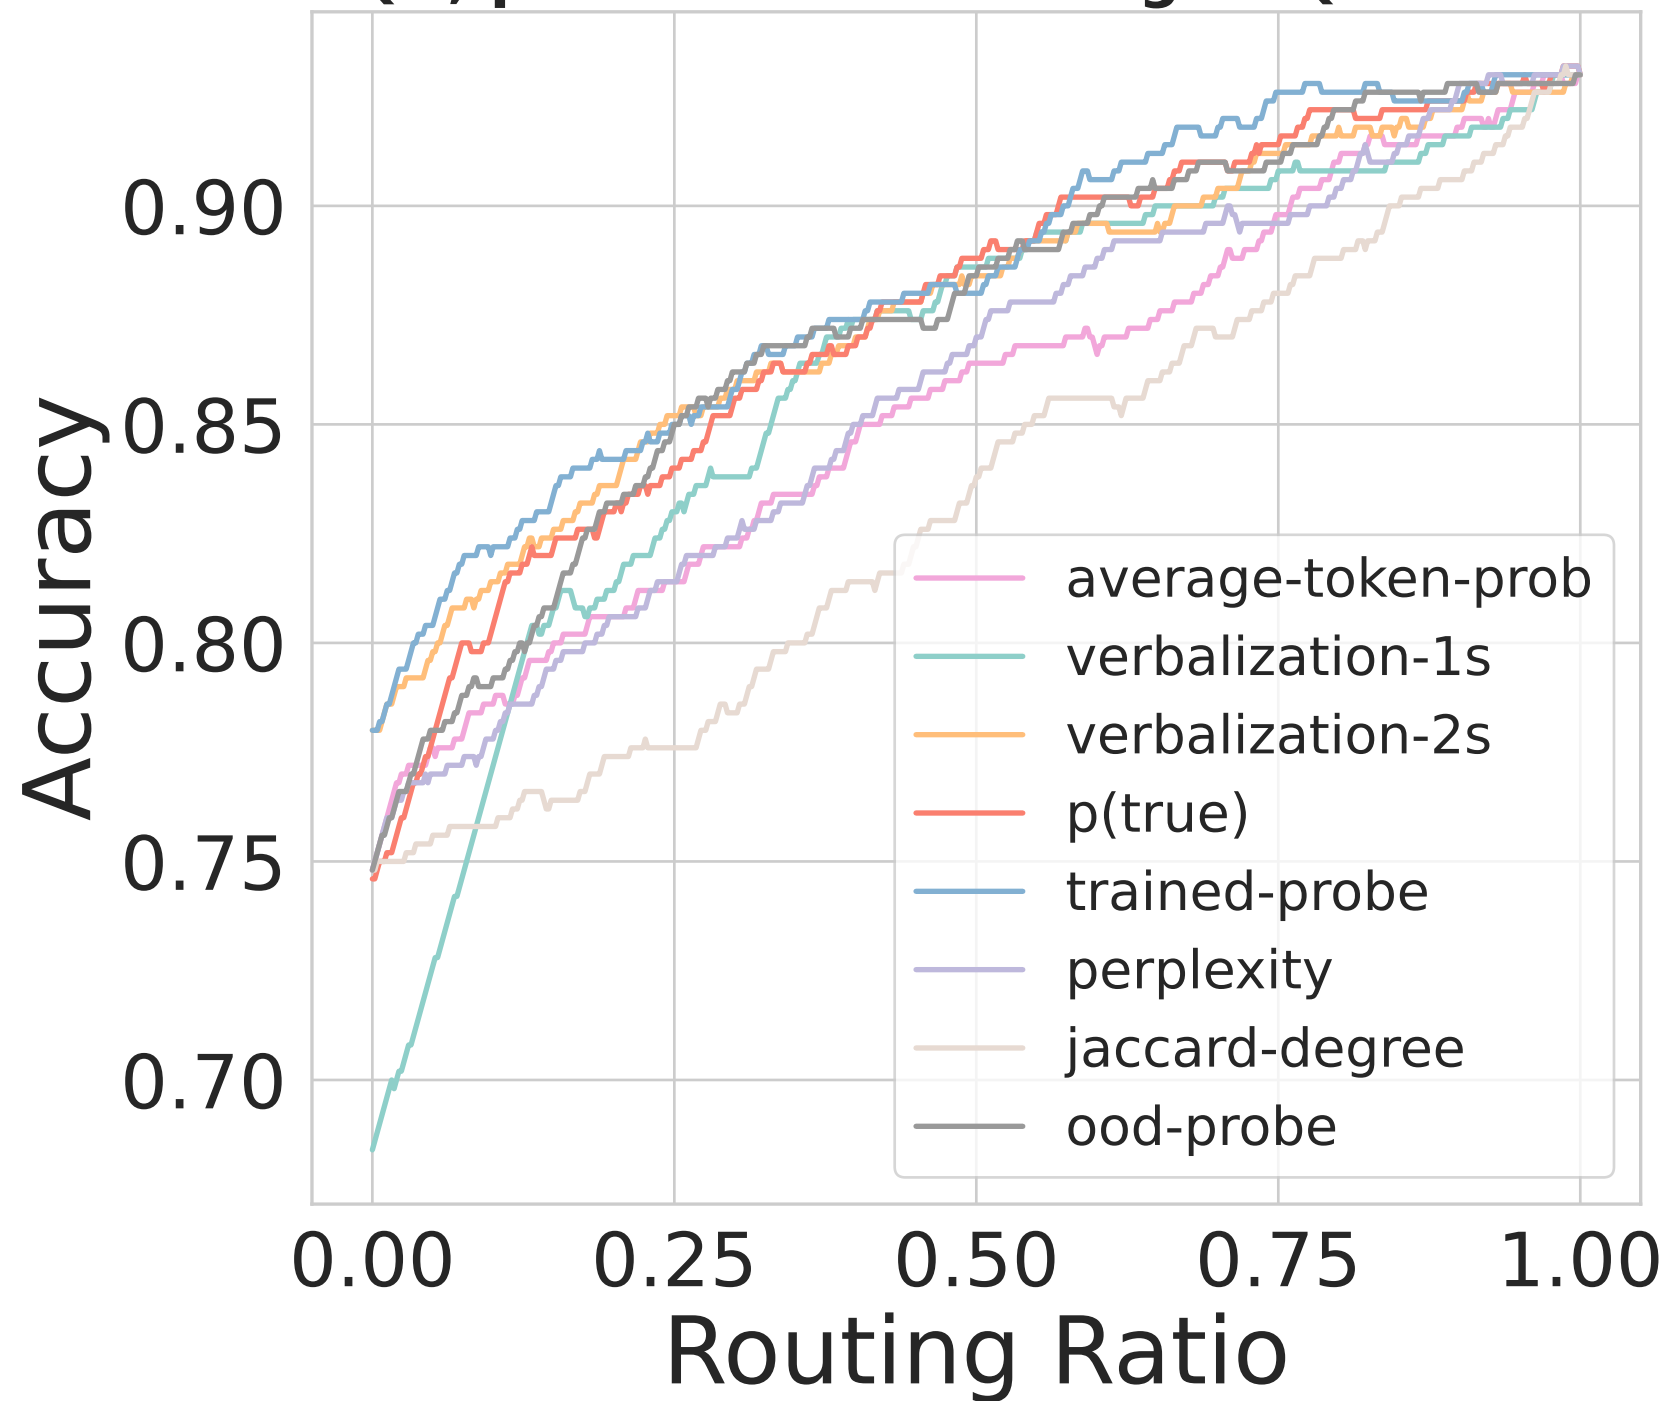

Supplement: supplementary_material [file rr_acc_pi_qa_phi-4-mini-reasoning_qwen32.pdf › Routing_SLM_LLMs/Uncertainty-based Routing/w_legend/to_qwen32/rr_acc_pi_qa_phi-4-mini-reasoning_qwen32.pdf]

**PIQA, qwen-2.5-7b to Qwen3-32B**

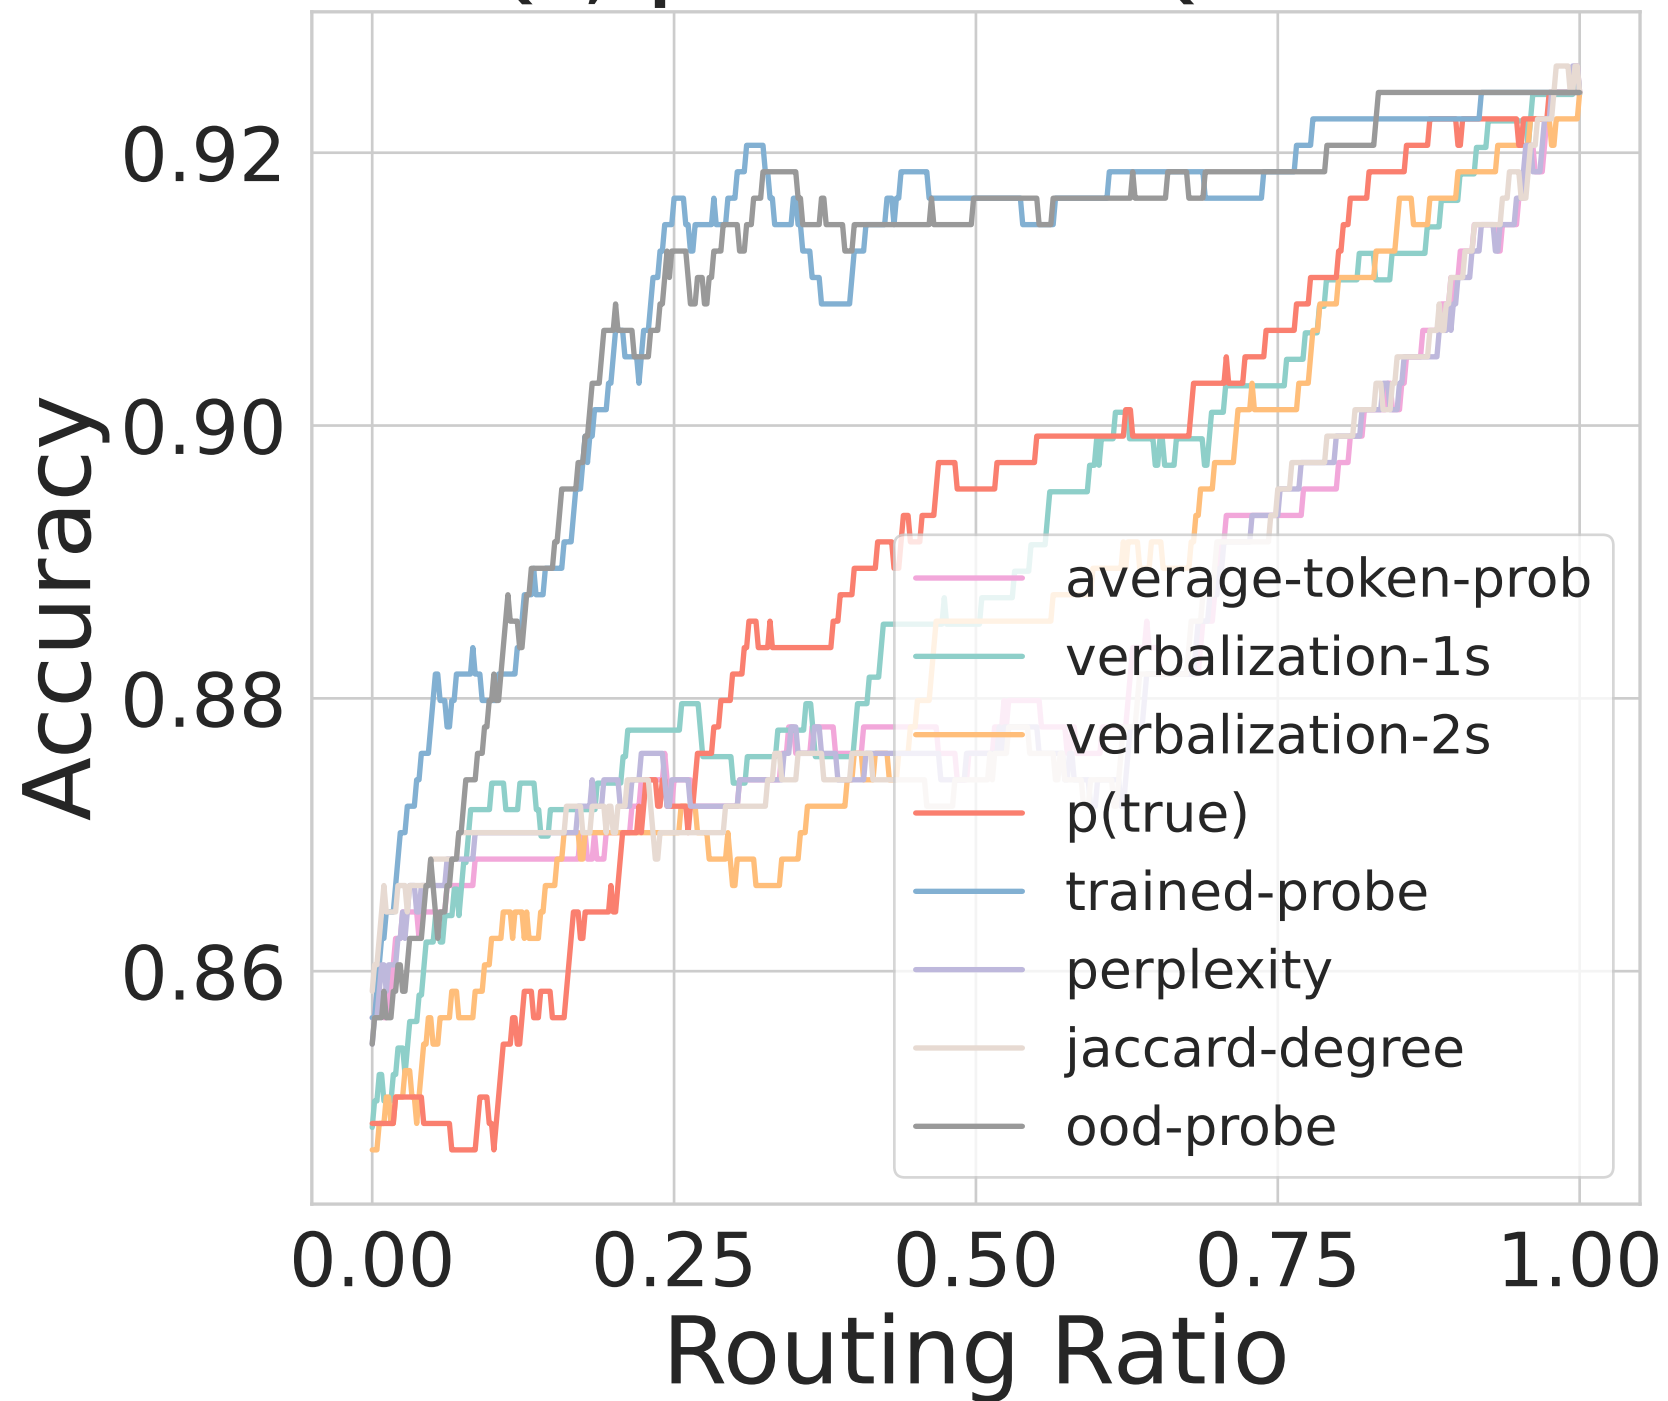

Supplement: supplementary_material [file rr_acc_pi_qa_qwen-2.5-7b_qwen32.pdf › Routing_SLM_LLMs/Uncertainty-based Routing/w_legend/to_qwen32/rr_acc_pi_qa_qwen-2.5-7b_qwen32.pdf]

# PIQA, rwkv to Qwen3-32B

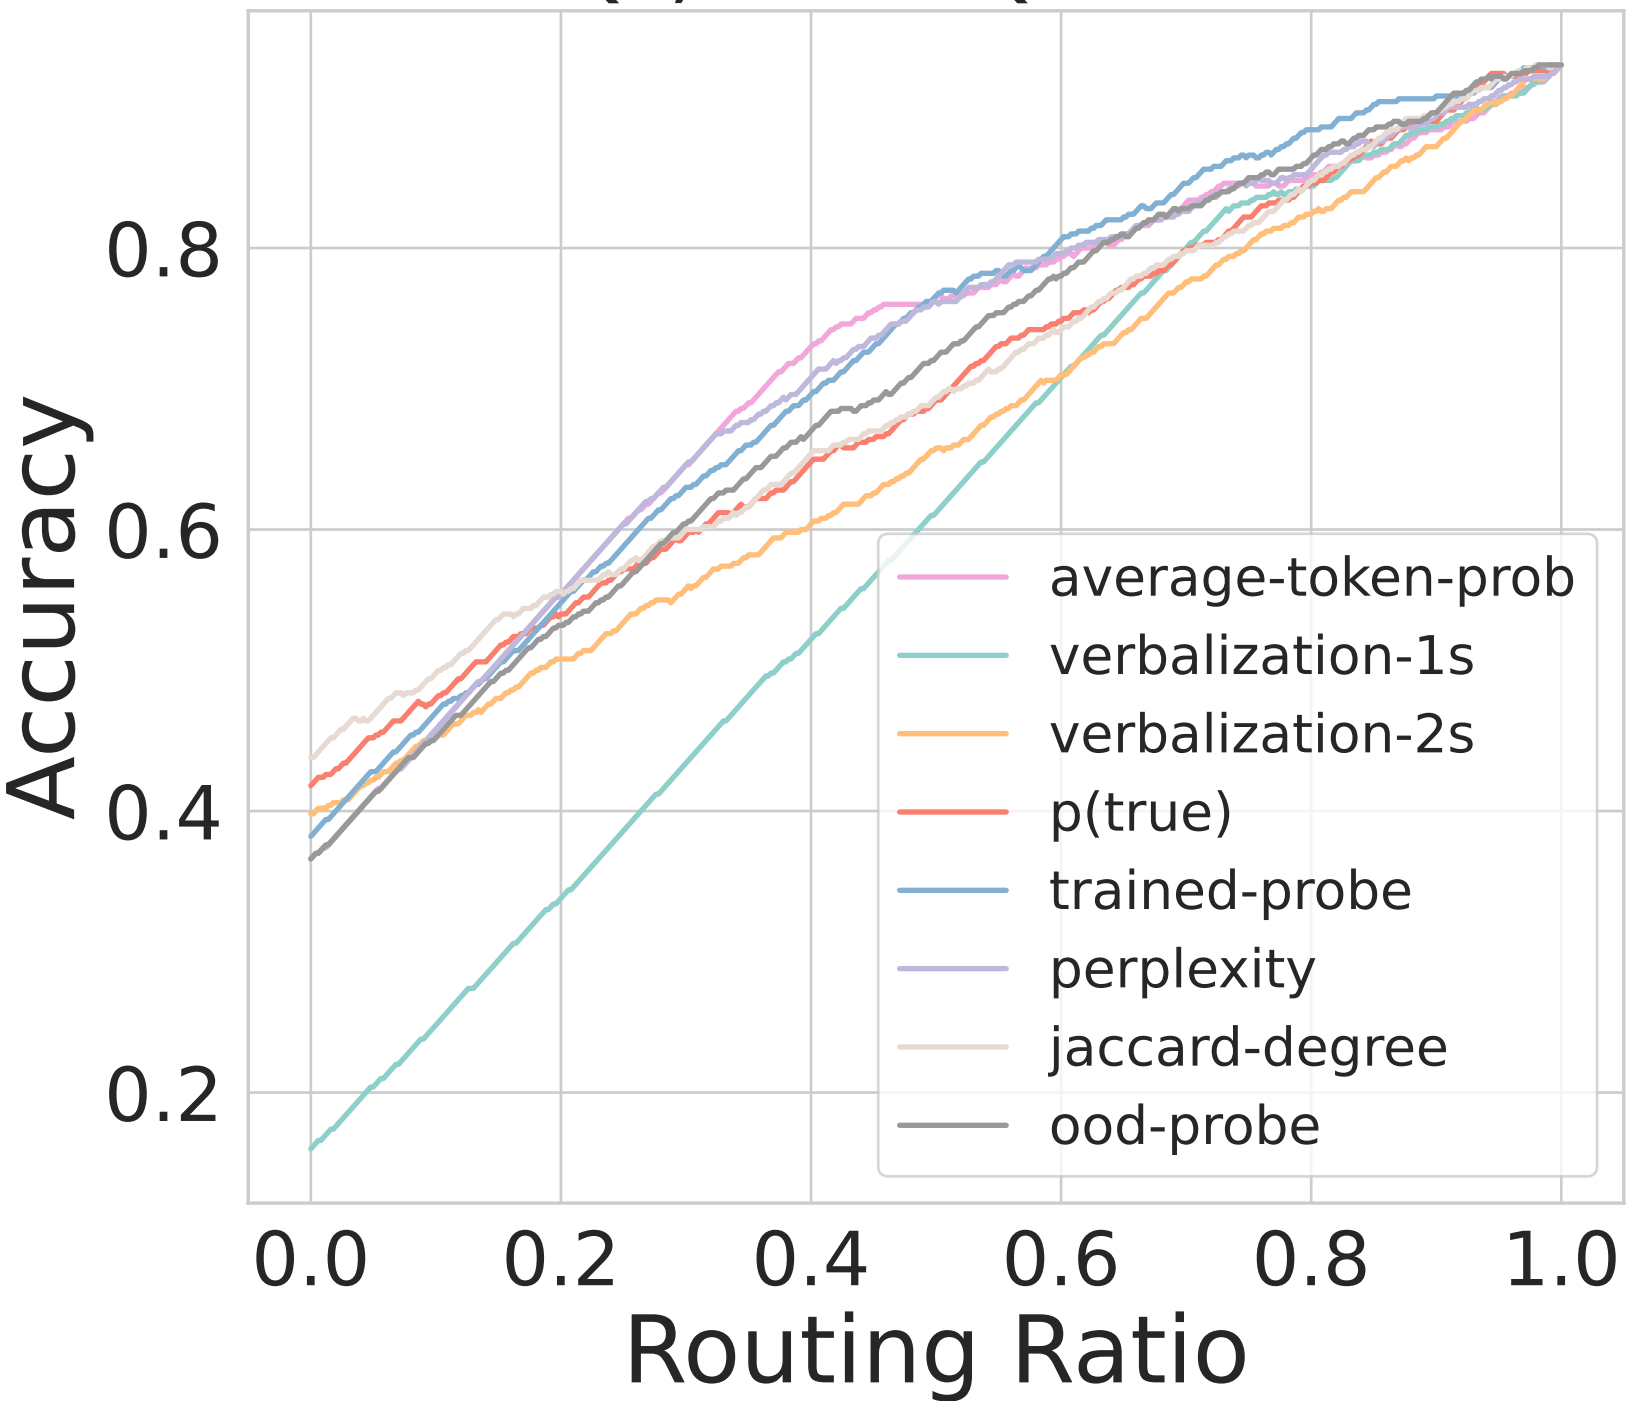

Supplement: supplementary_material [file rr_acc_pi_qa_rwkv_qwen32.pdf › Routing_SLM_LLMs/Uncertainty-based Routing/w_legend/to_qwen32/rr_acc_pi_qa_rwkv_qwen32.pdf]

## Social IQa, Qwen3-0.6B to Qwen3-32B

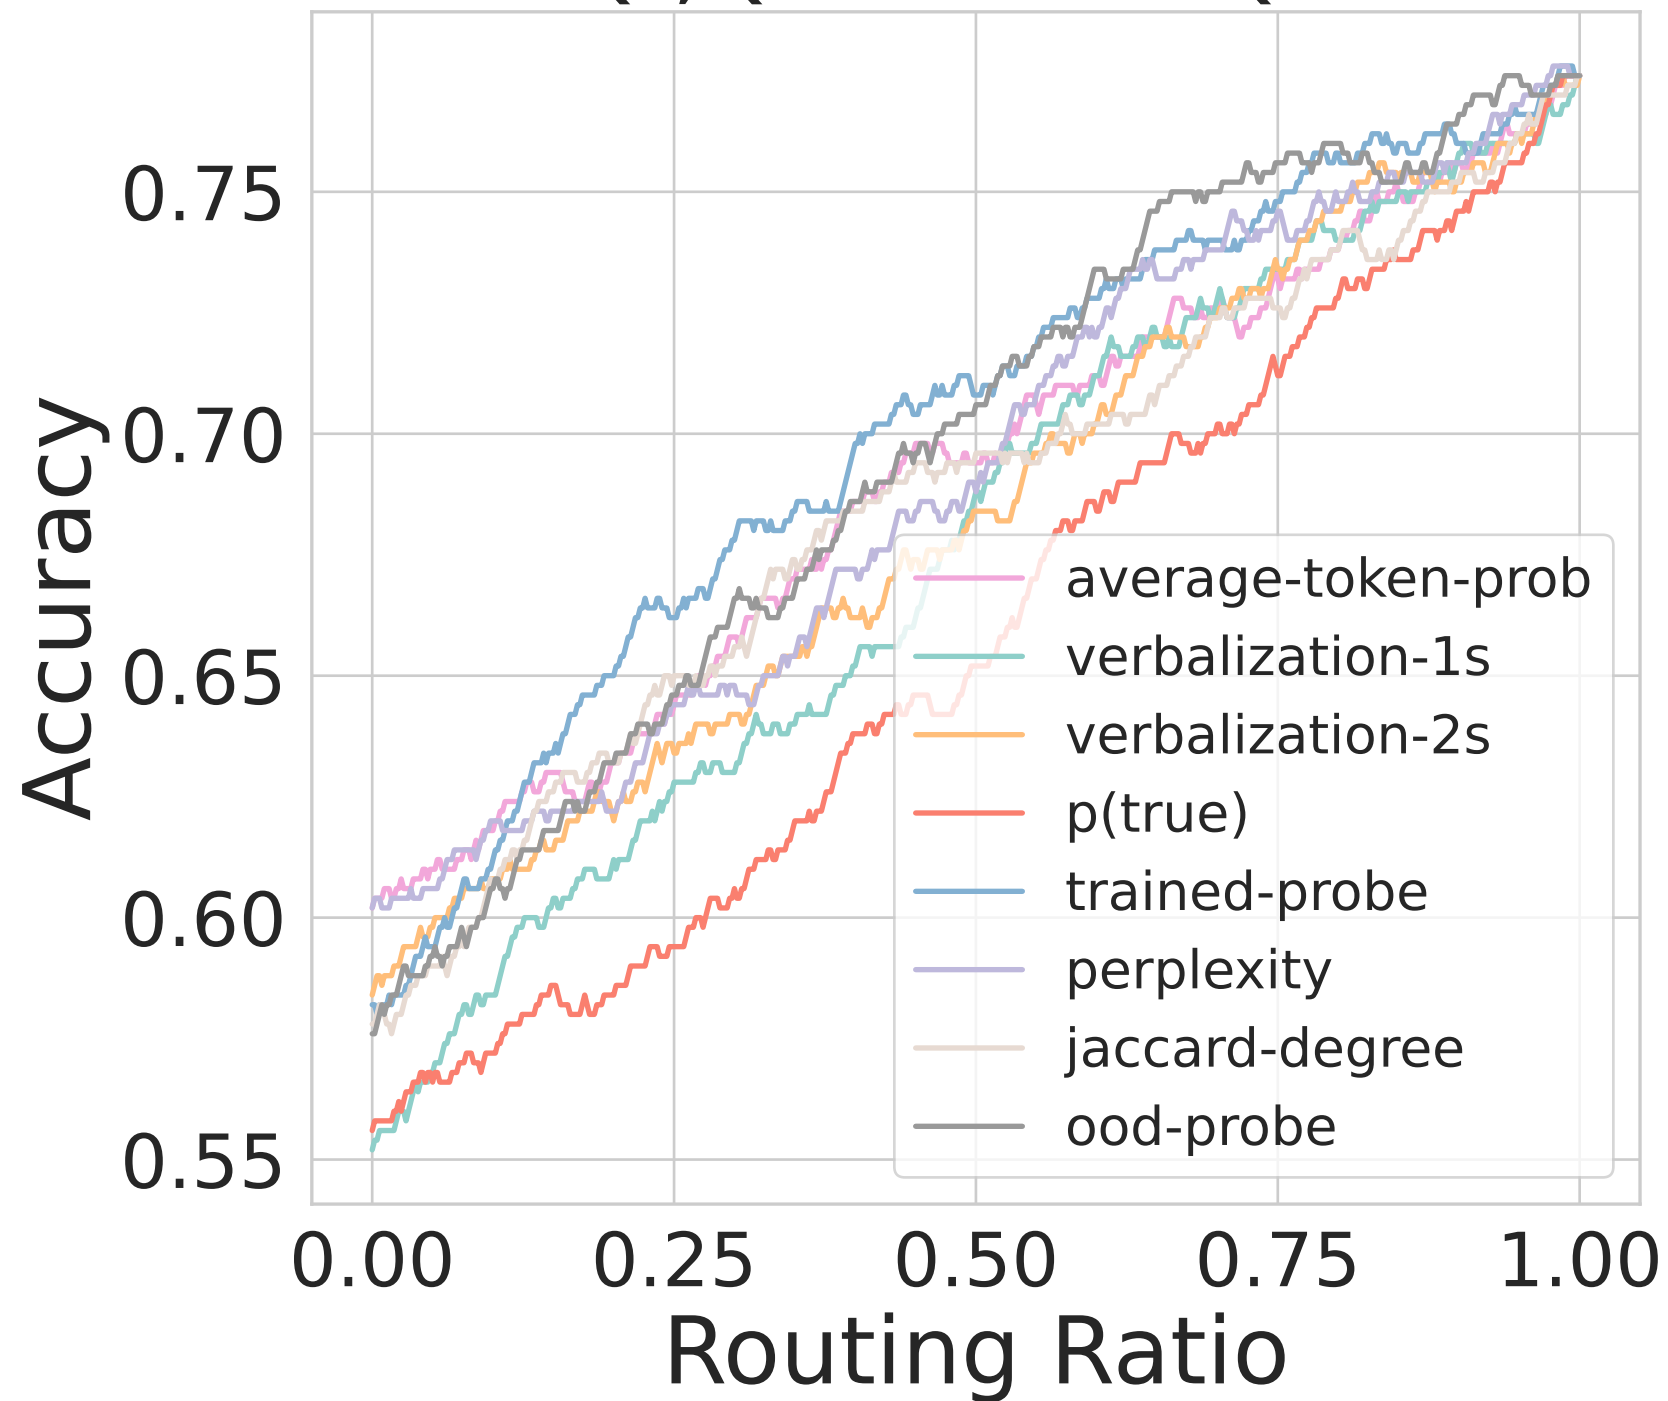

Supplement: supplementary_material [file rr_acc_social_i_qa_Qwen3-0.6B_qwen32.pdf › Routing_SLM_LLMs/Uncertainty-based Routing/w_legend/to_qwen32/rr_acc_social_i_qa_Qwen3-0.6B_qwen32.pdf]

**Social IQa, Qwen3-1.7B to Qwen3-32B**

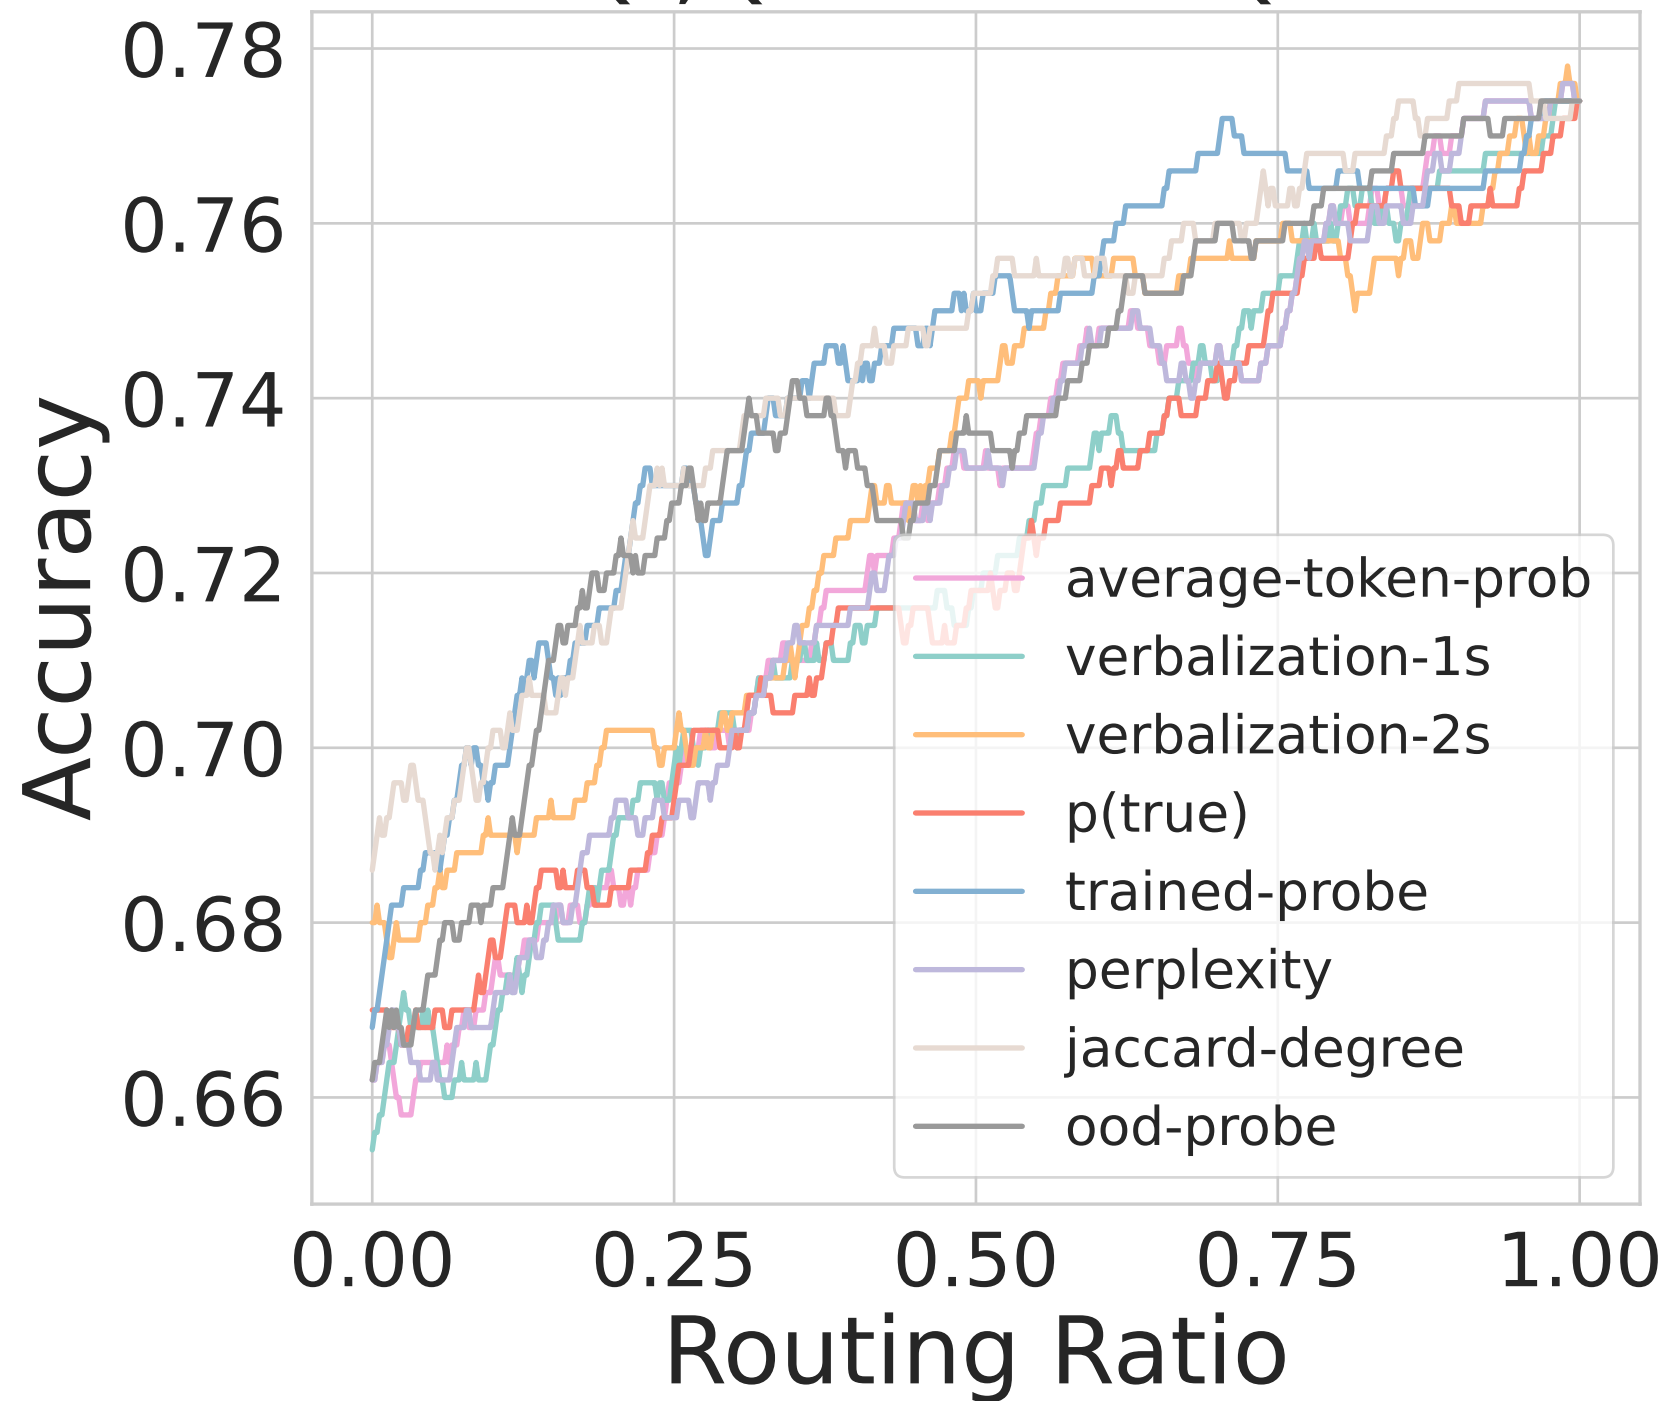

Supplement: supplementary_material [file rr_acc_social_i_qa_Qwen3-1.7B_qwen32.pdf › Routing_SLM_LLMs/Uncertainty-based Routing/w_legend/to_qwen32/rr_acc_social_i_qa_Qwen3-1.7B_qwen32.pdf]

# Social IQa, granite-3.1-8b to Qwen3-32B

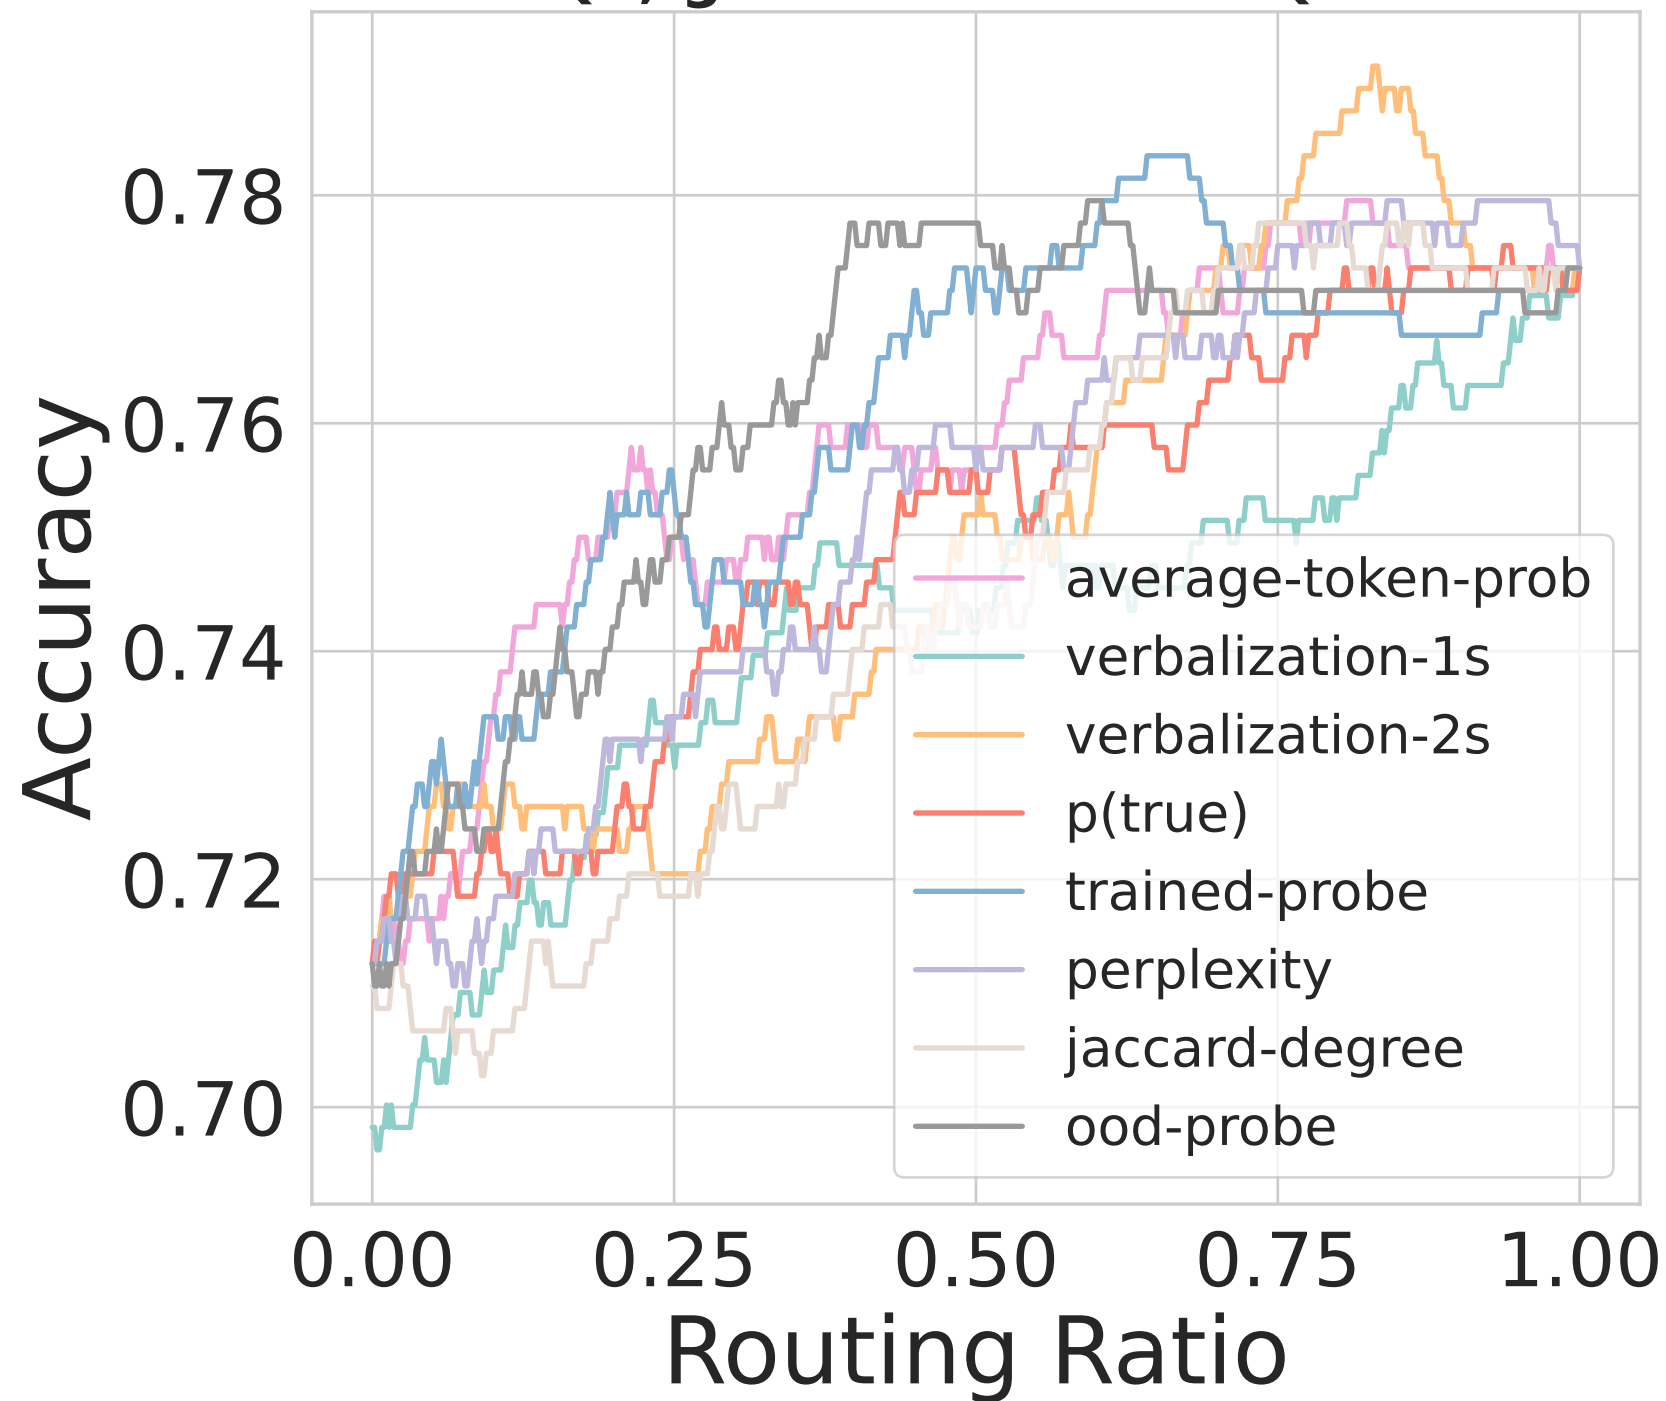

Supplement: supplementary_material [file rr_acc_social_i_qa_granite-3.1-8b_qwen32.pdf › Routing_SLM_LLMs/Uncertainty-based Routing/w_legend/to_qwen32/rr_acc_social_i_qa_granite-3.1-8b_qwen32.pdf]

## Social IQa, llama-3.2-1b to Qwen3-32B

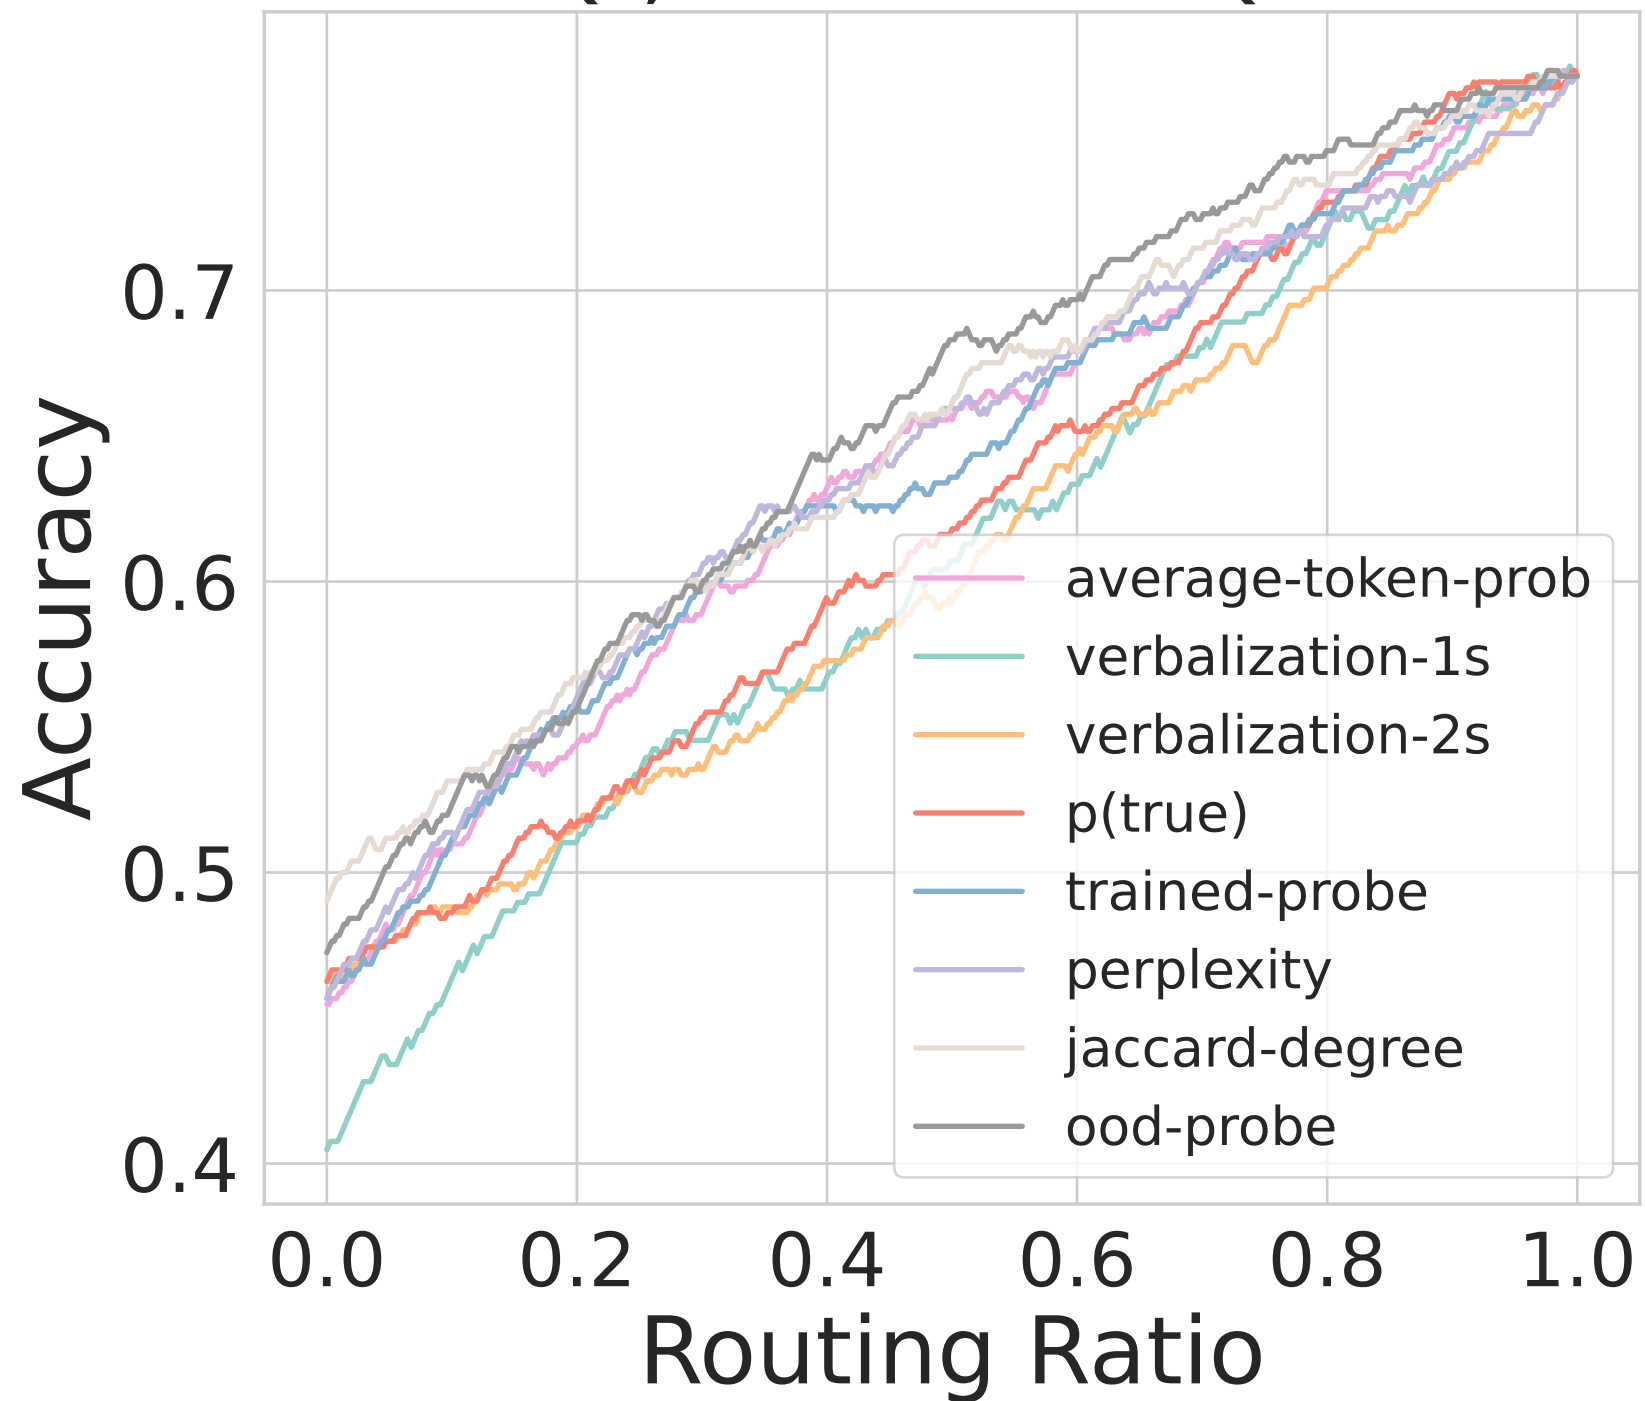

Supplement: supplementary_material [file rr_acc_social_i_qa_llama-3.2-1b_qwen32.pdf › Routing_SLM_LLMs/Uncertainty-based Routing/w_legend/to_qwen32/rr_acc_social_i_qa_llama-3.2-1b_qwen32.pdf]

**Social IQa, mistral-7b to Qwen3-32B**

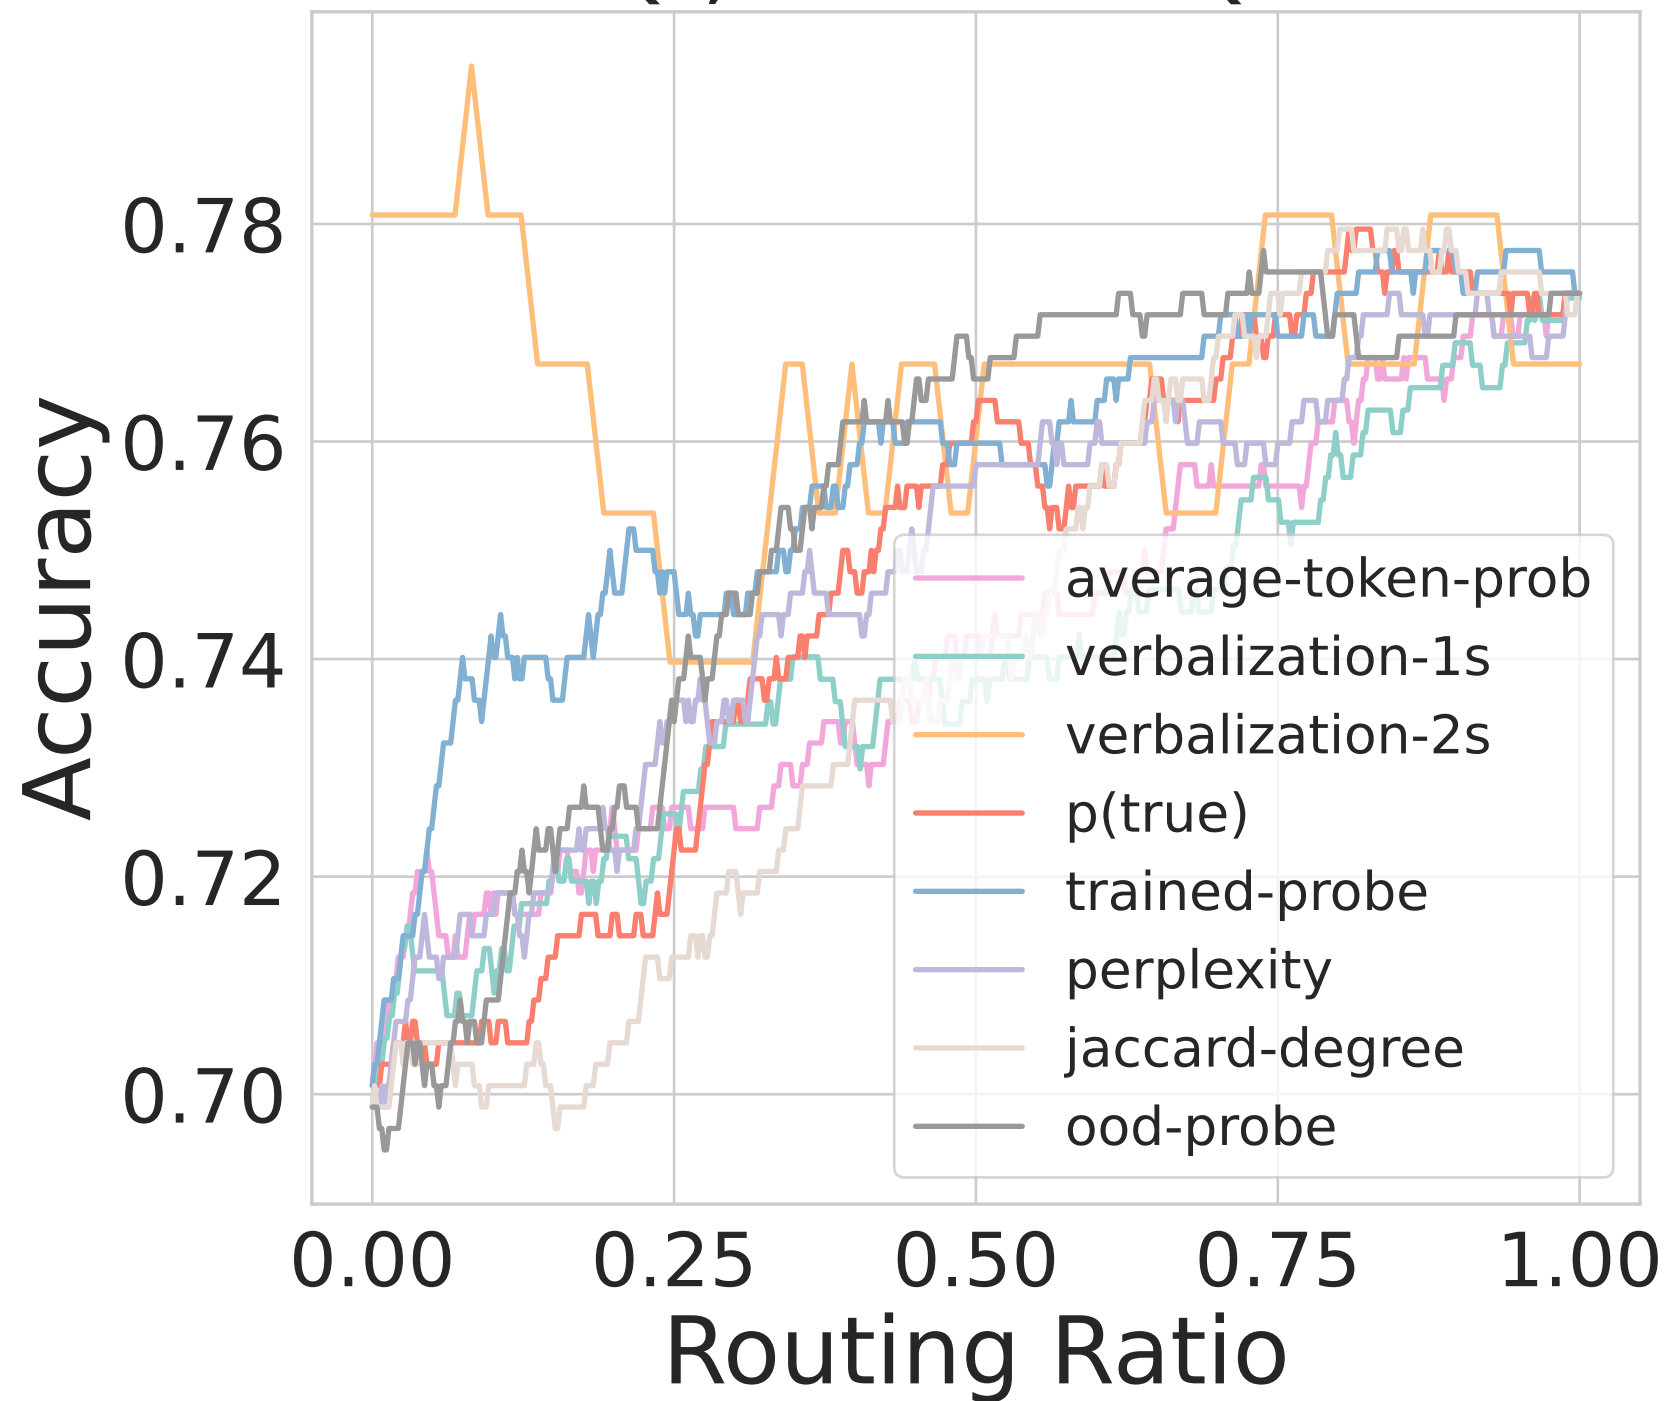

Supplement: supplementary_material [file rr_acc_social_i_qa_mistral-7b_qwen32.pdf › Routing_SLM_LLMs/Uncertainty-based Routing/w_legend/to_qwen32/rr_acc_social_i_qa_mistral-7b_qwen32.pdf]

**Social IQa, phi-3.5-mini to Qwen3-32B**

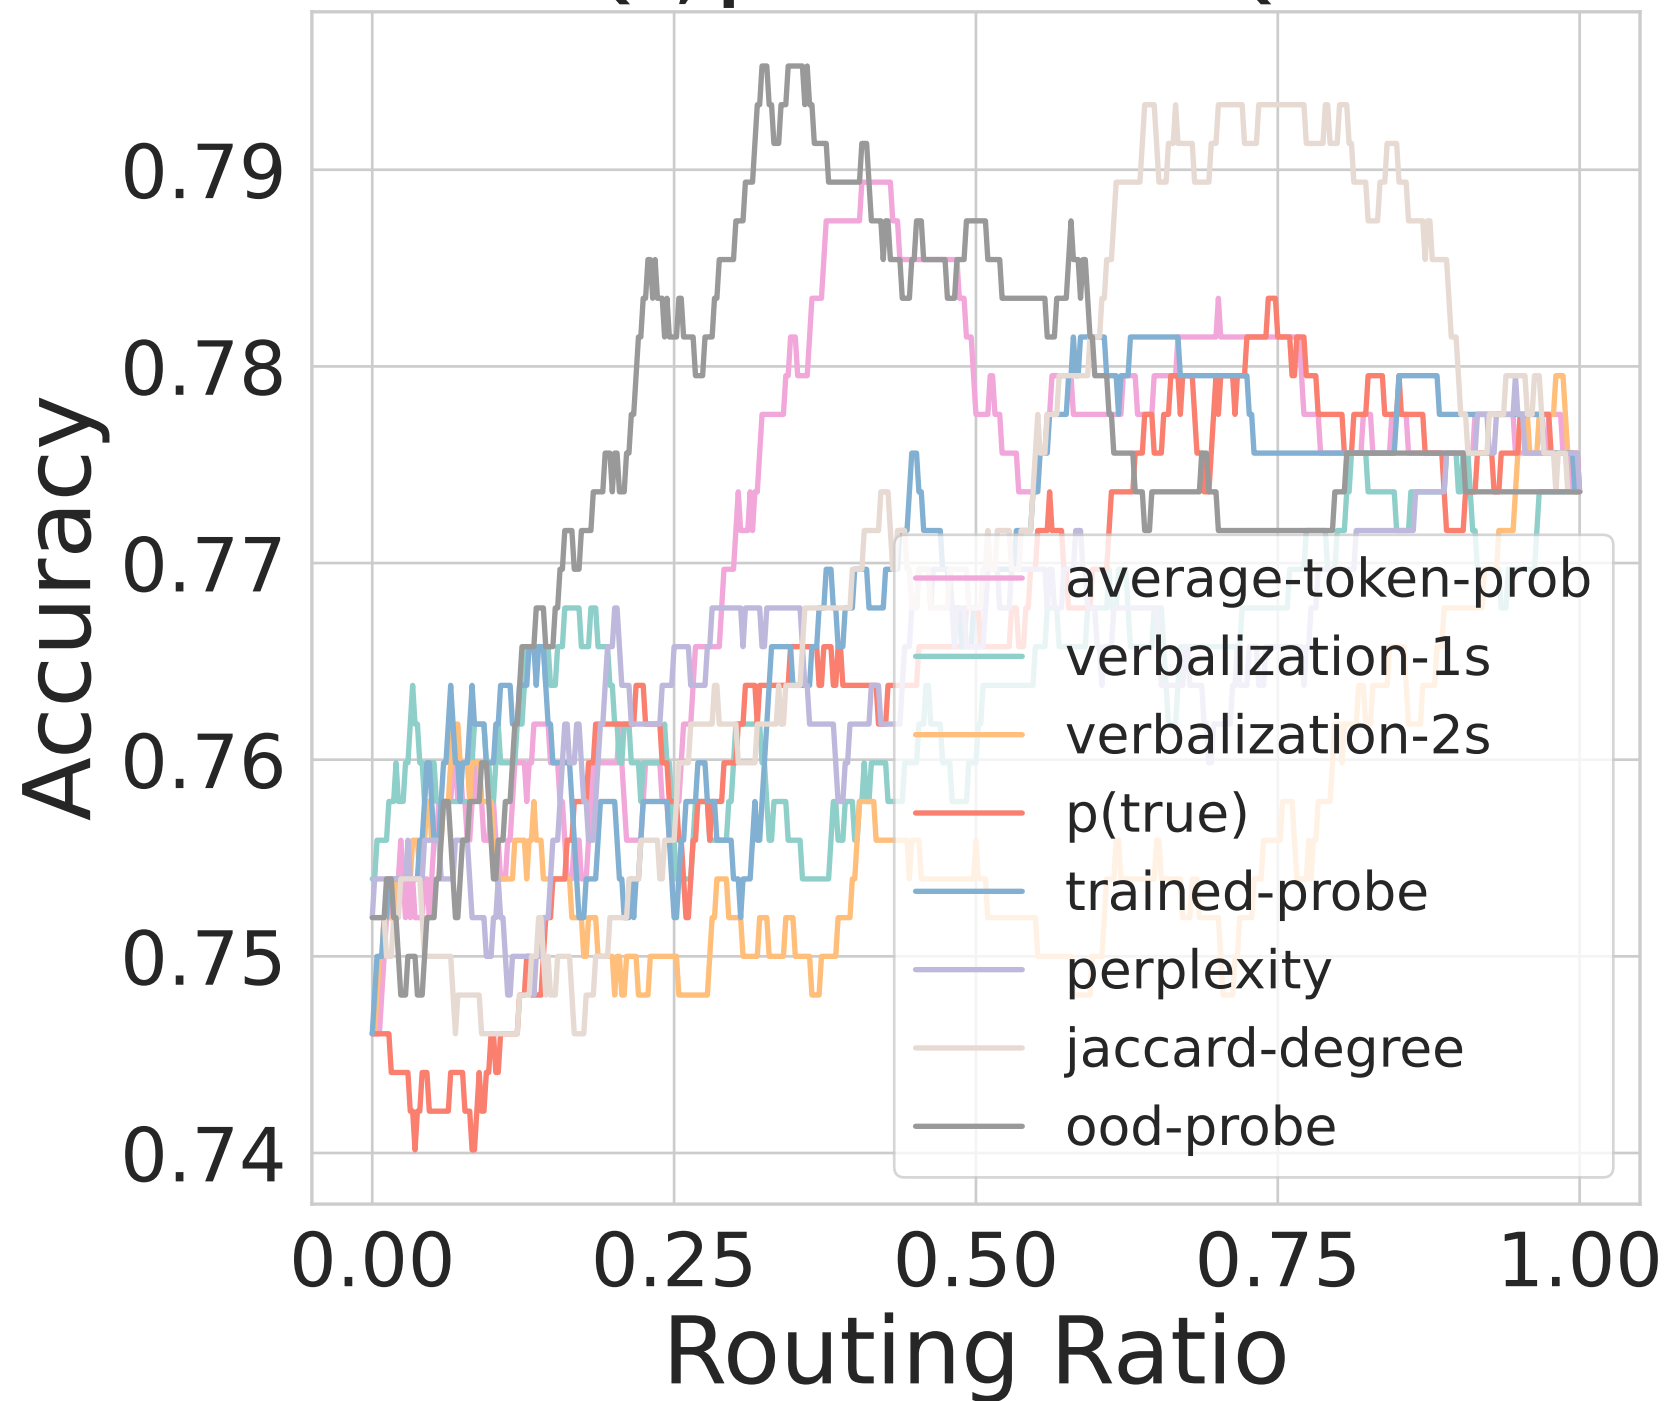

Supplement: supplementary_material [file rr_acc_social_i_qa_phi-3.5-mini_qwen32.pdf › Routing_SLM_LLMs/Uncertainty-based Routing/w_legend/to_qwen32/rr_acc_social_i_qa_phi-3.5-mini_qwen32.pdf]

# Social IQa, phi-4-mini-reasoning to Qwen3-32B

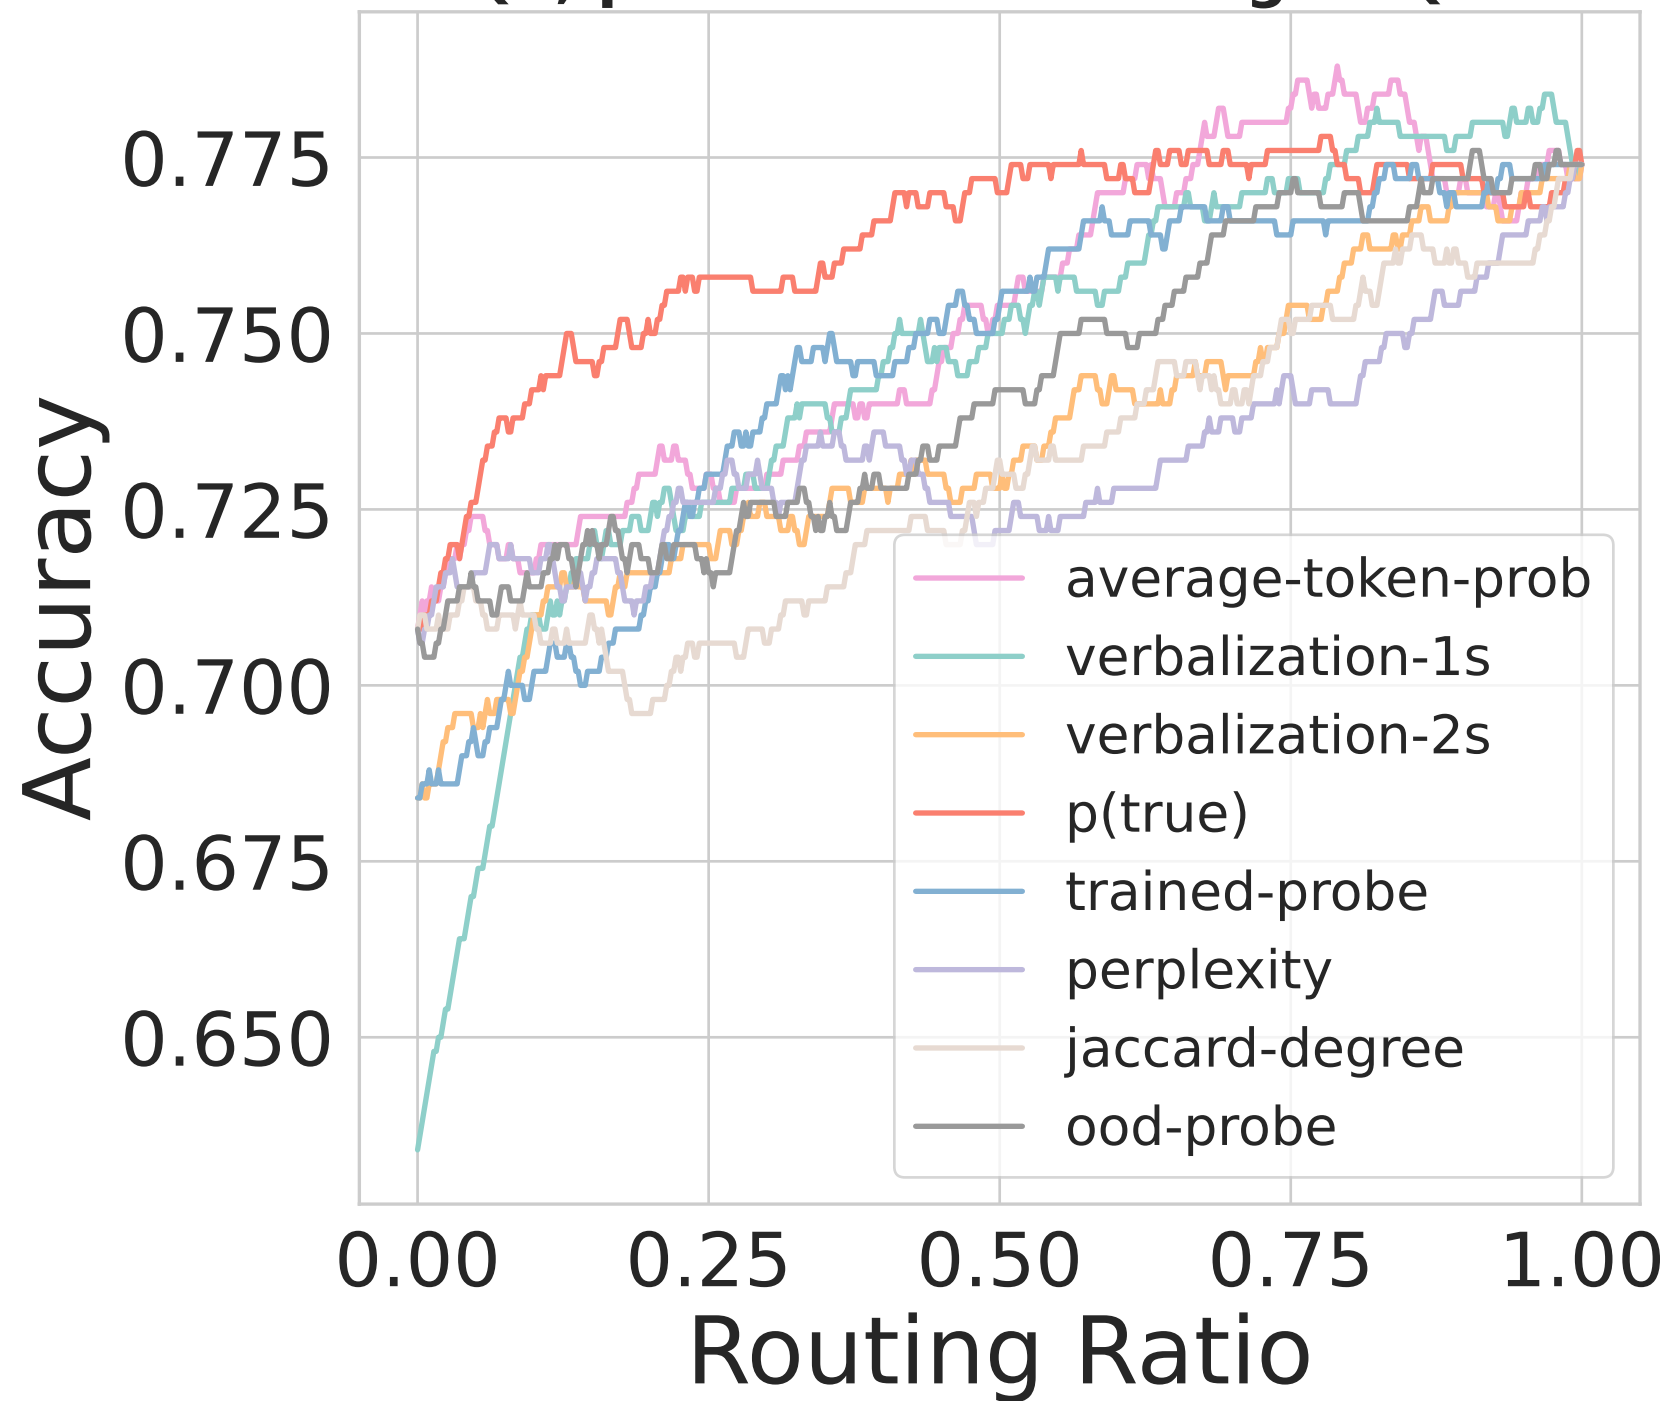

Supplement: supplementary_material [file rr_acc_social_i_qa_phi-4-mini-reasoning_qwen32.pdf › Routing_SLM_LLMs/Uncertainty-based Routing/w_legend/to_qwen32/rr_acc_social_i_qa_phi-4-mini-reasoning_qwen32.pdf]

**Social IQa, qwen-2.5-7b to Qwen3-32B**

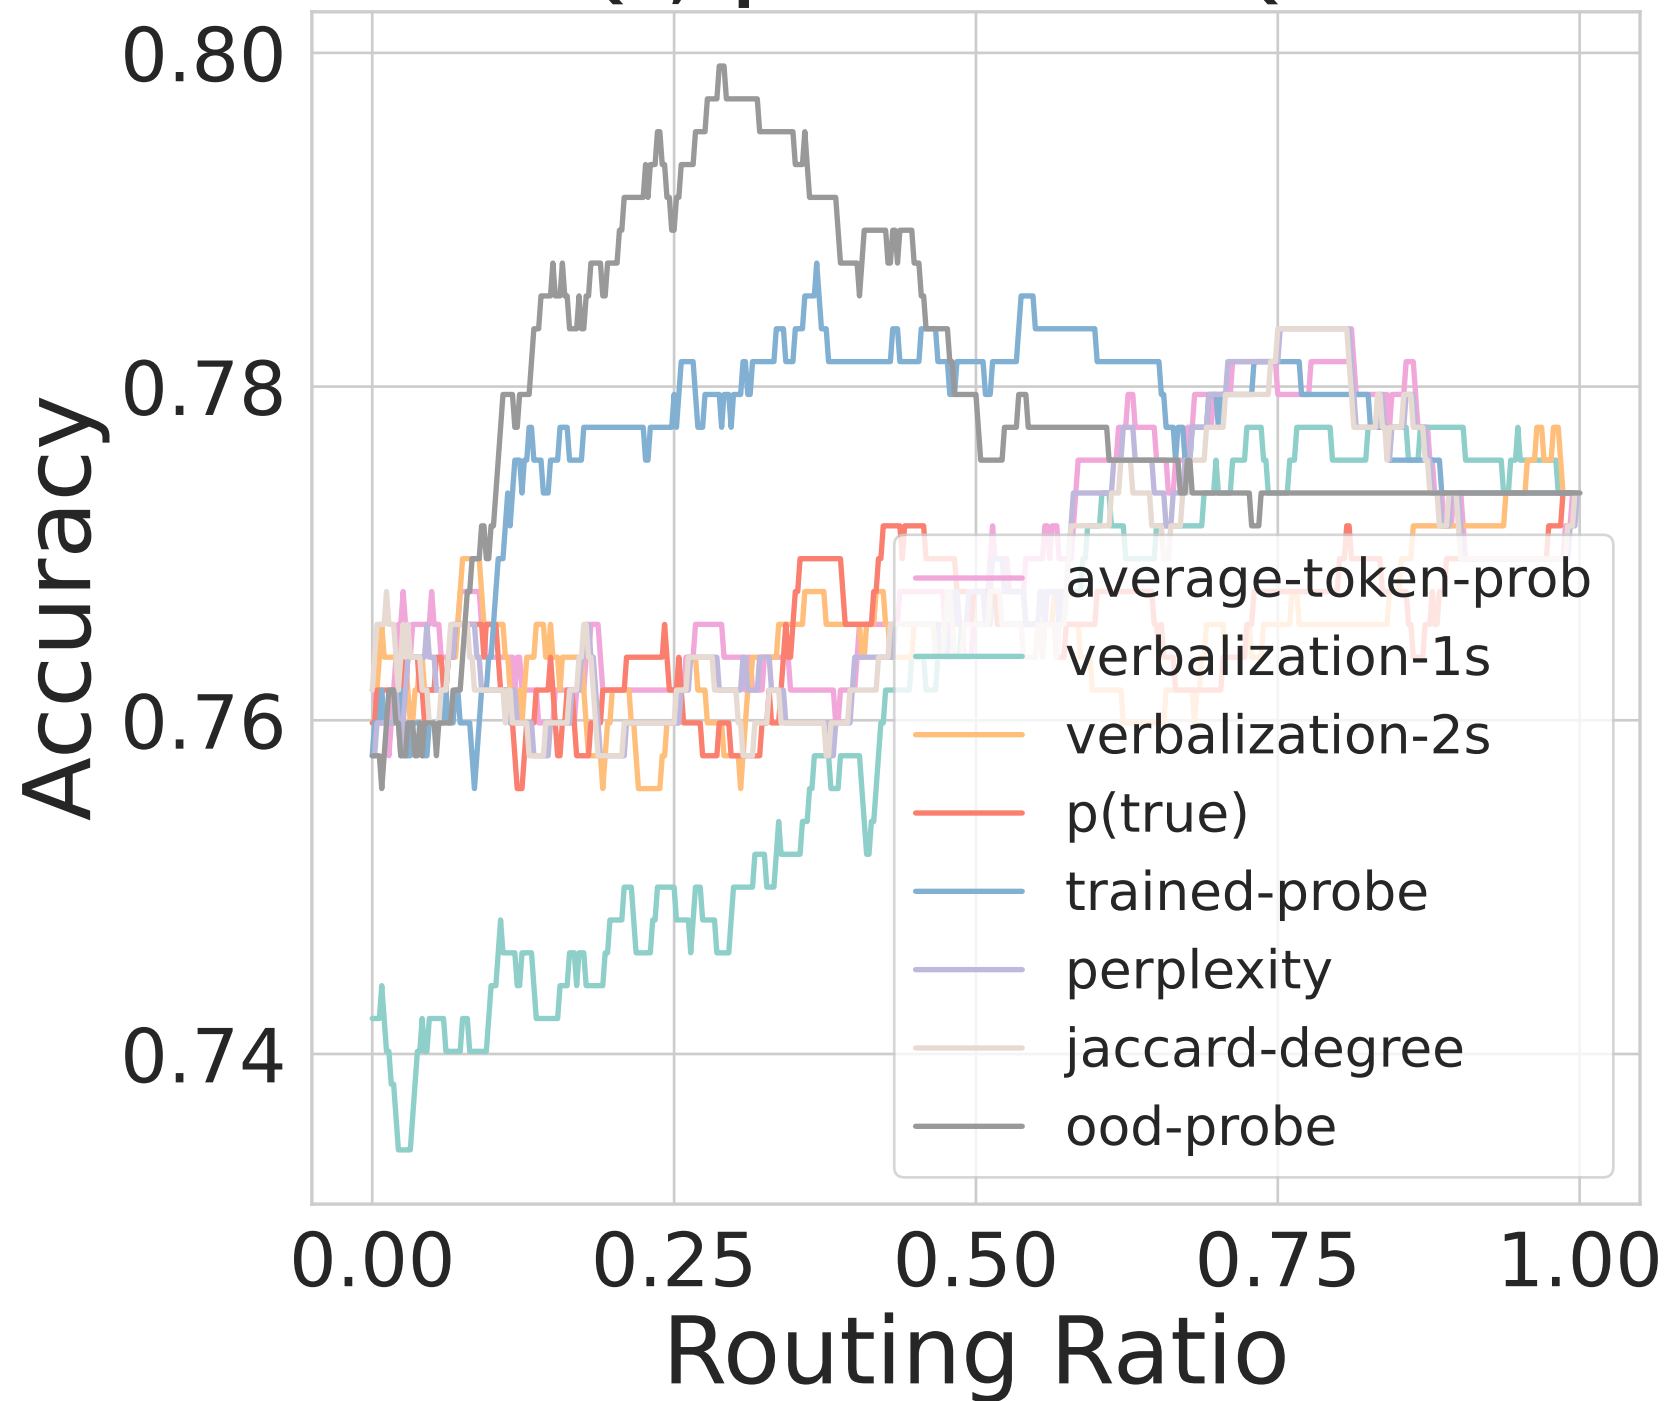

Supplement: supplementary_material [file rr_acc_social_i_qa_qwen-2.5-7b_qwen32.pdf › Routing_SLM_LLMs/Uncertainty-based Routing/w_legend/to_qwen32/rr_acc_social_i_qa_qwen-2.5-7b_qwen32.pdf]

**Social IQa, rwkv to Qwen3-32B**

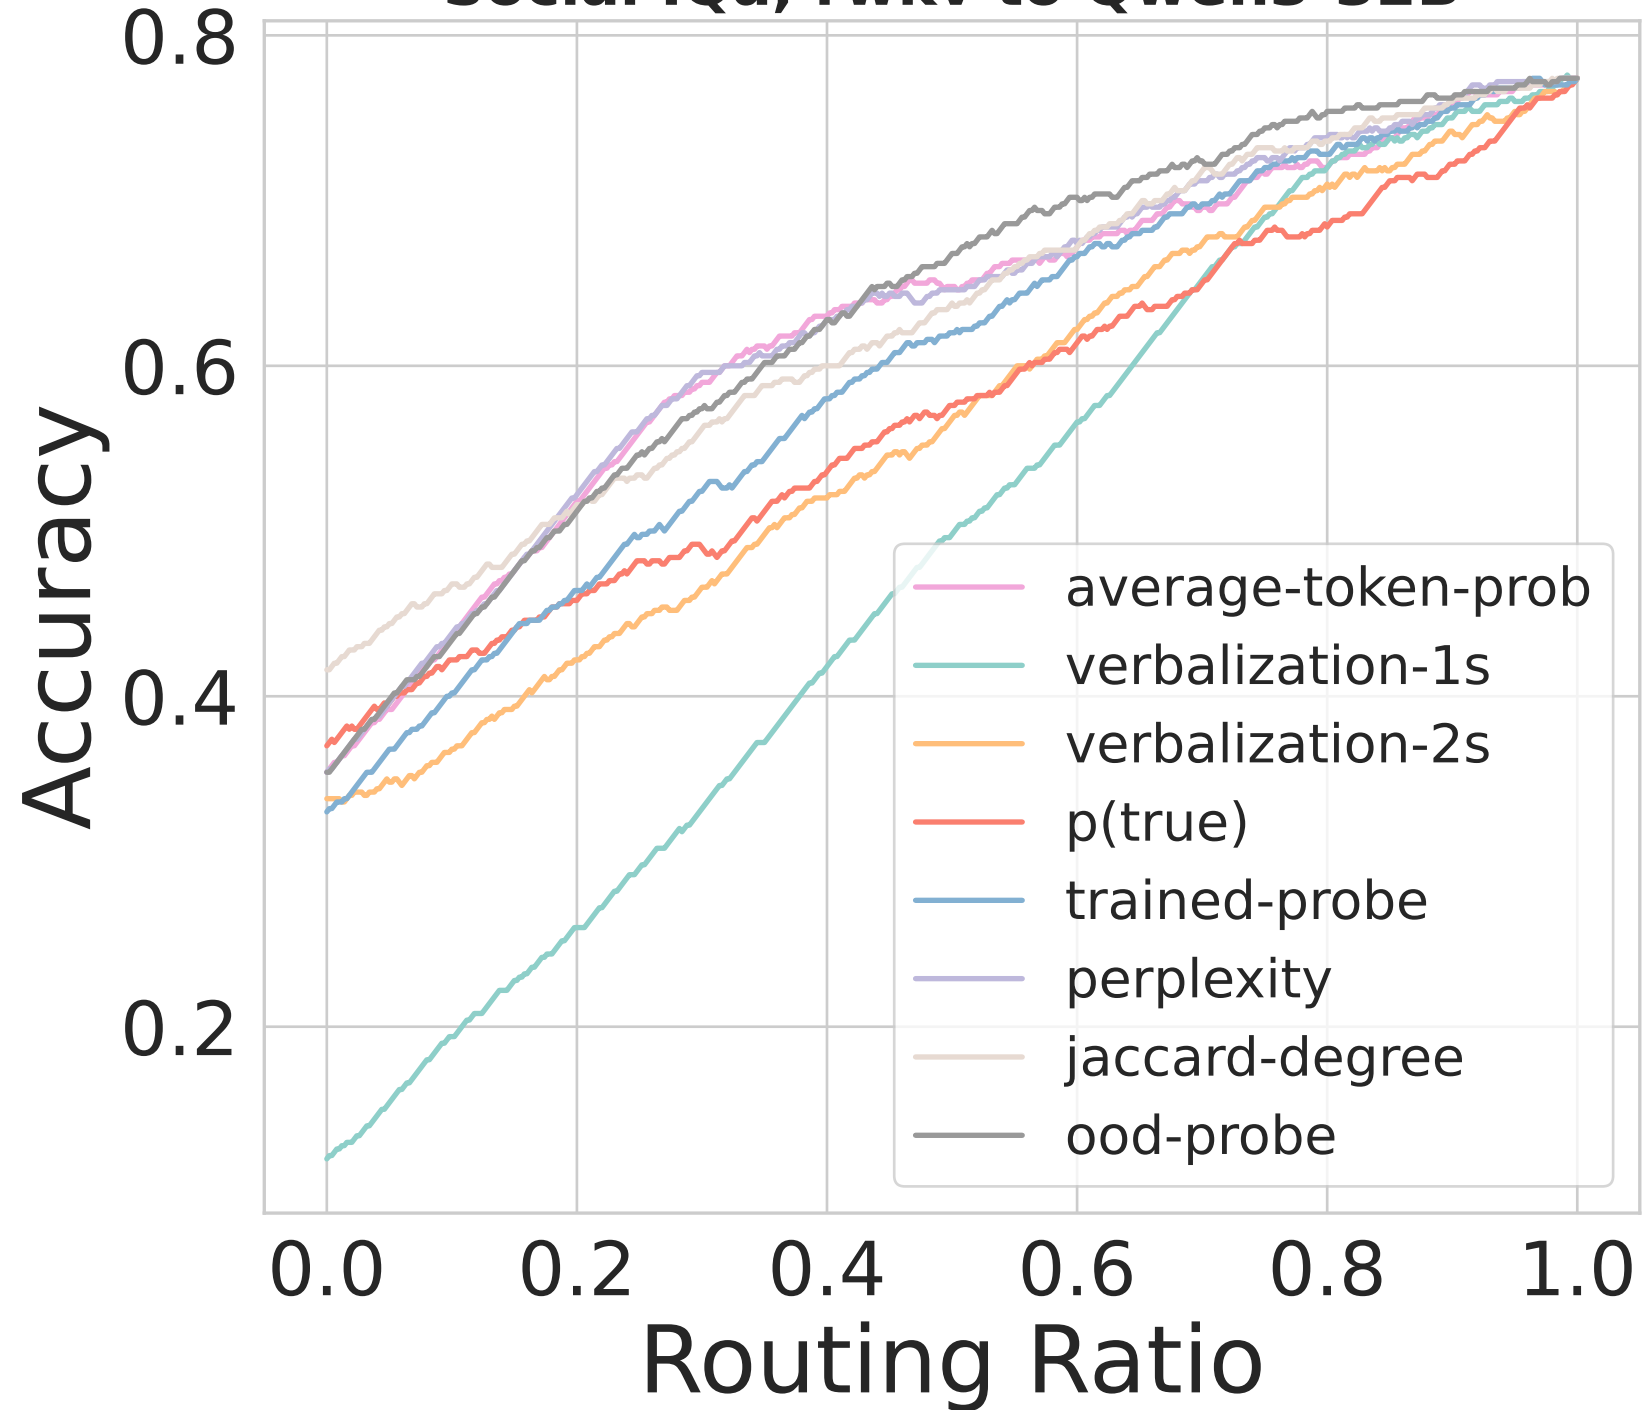

Supplement: supplementary_material [file rr_acc_social_i_qa_rwkv_qwen32.pdf › Routing_SLM_LLMs/Uncertainty-based Routing/w_legend/to_qwen32/rr_acc_social_i_qa_rwkv_qwen32.pdf]

## SVAMP, Qwen3-1.7B to Qwen3-32B

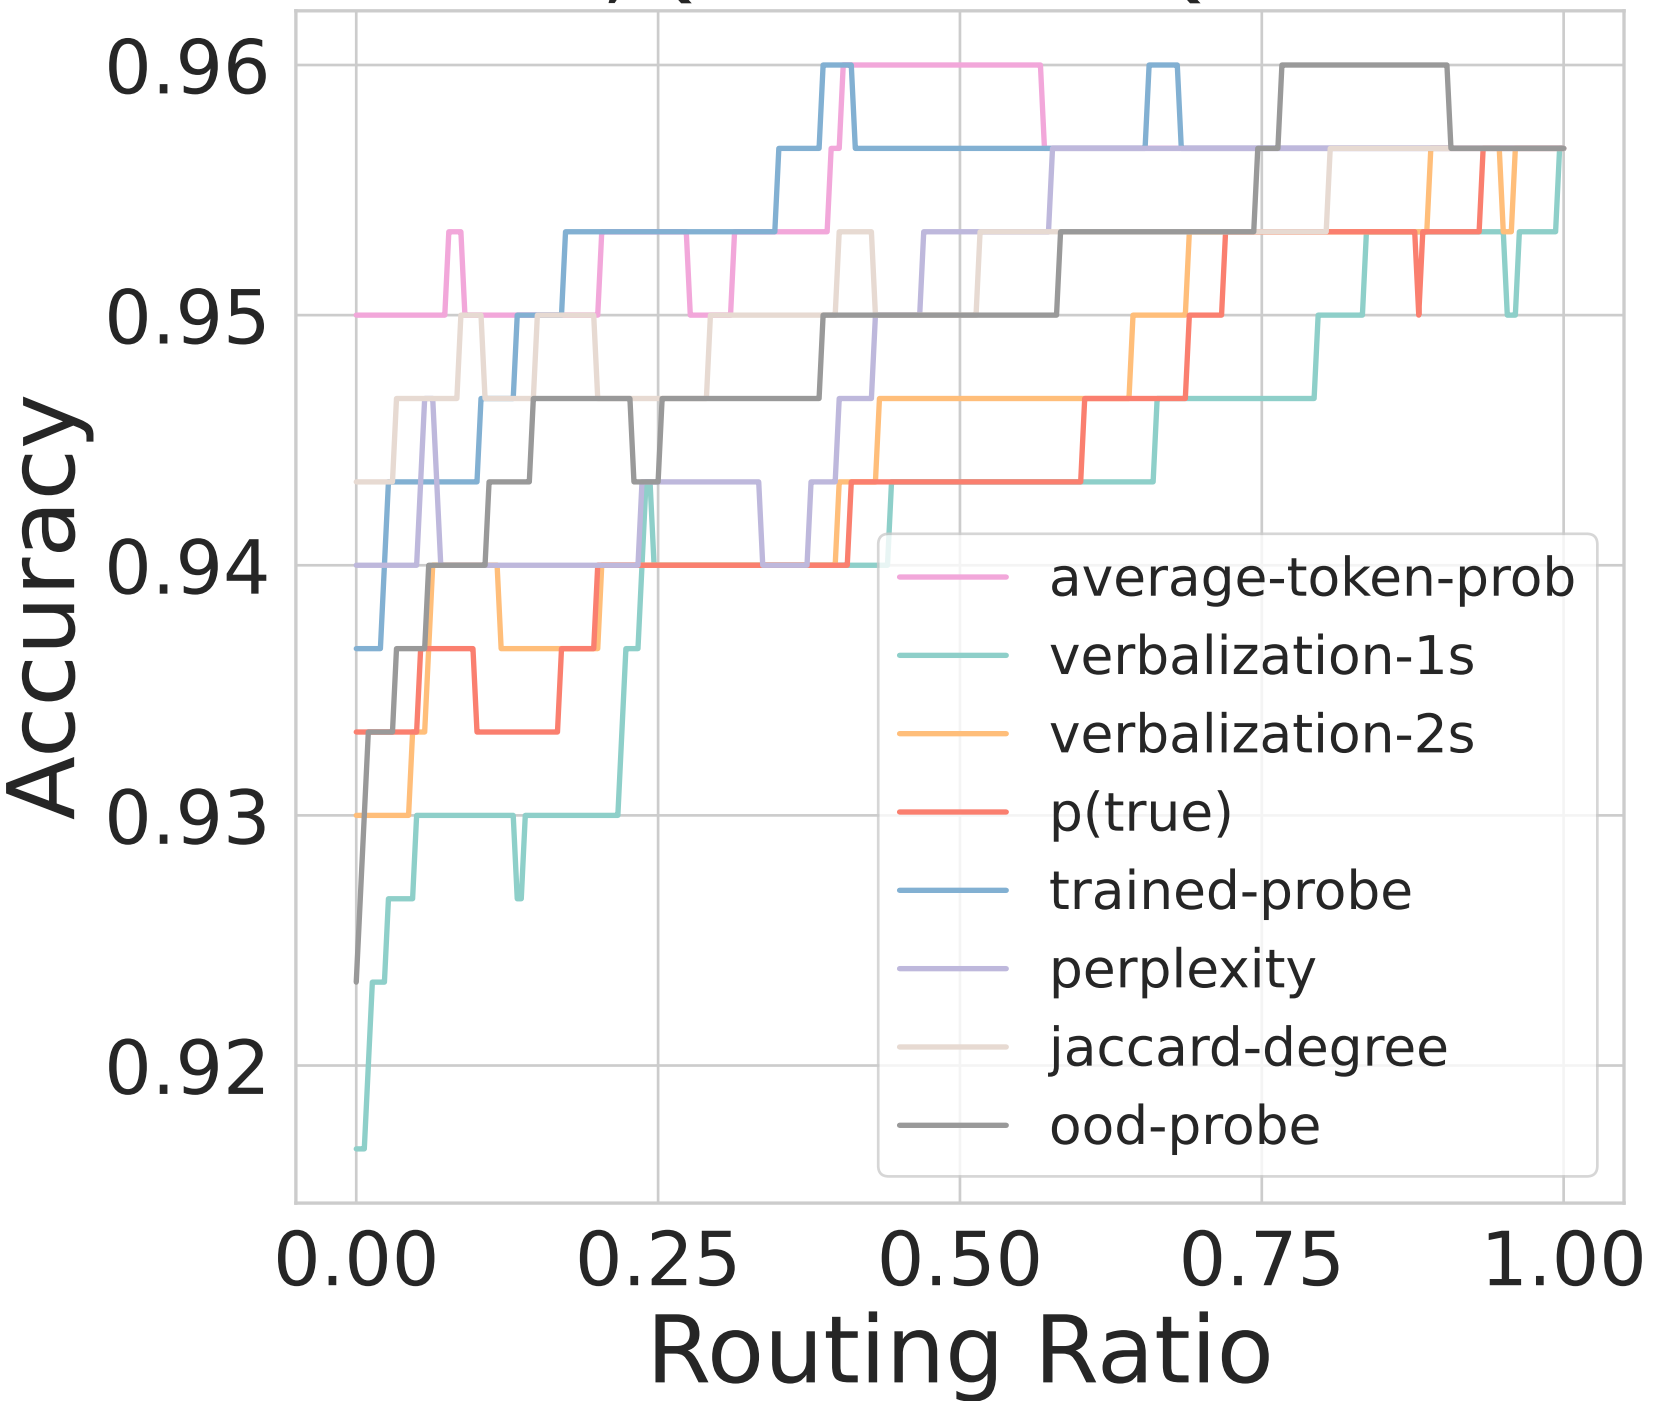

Supplement: supplementary_material [file rr_acc_svamp_Qwen3-1.7B_qwen32.pdf › Routing_SLM_LLMs/Uncertainty-based Routing/w_legend/to_qwen32/rr_acc_svamp_Qwen3-1.7B_qwen32.pdf]

**SVAMP, Qwen3-4B to Qwen3-32B**

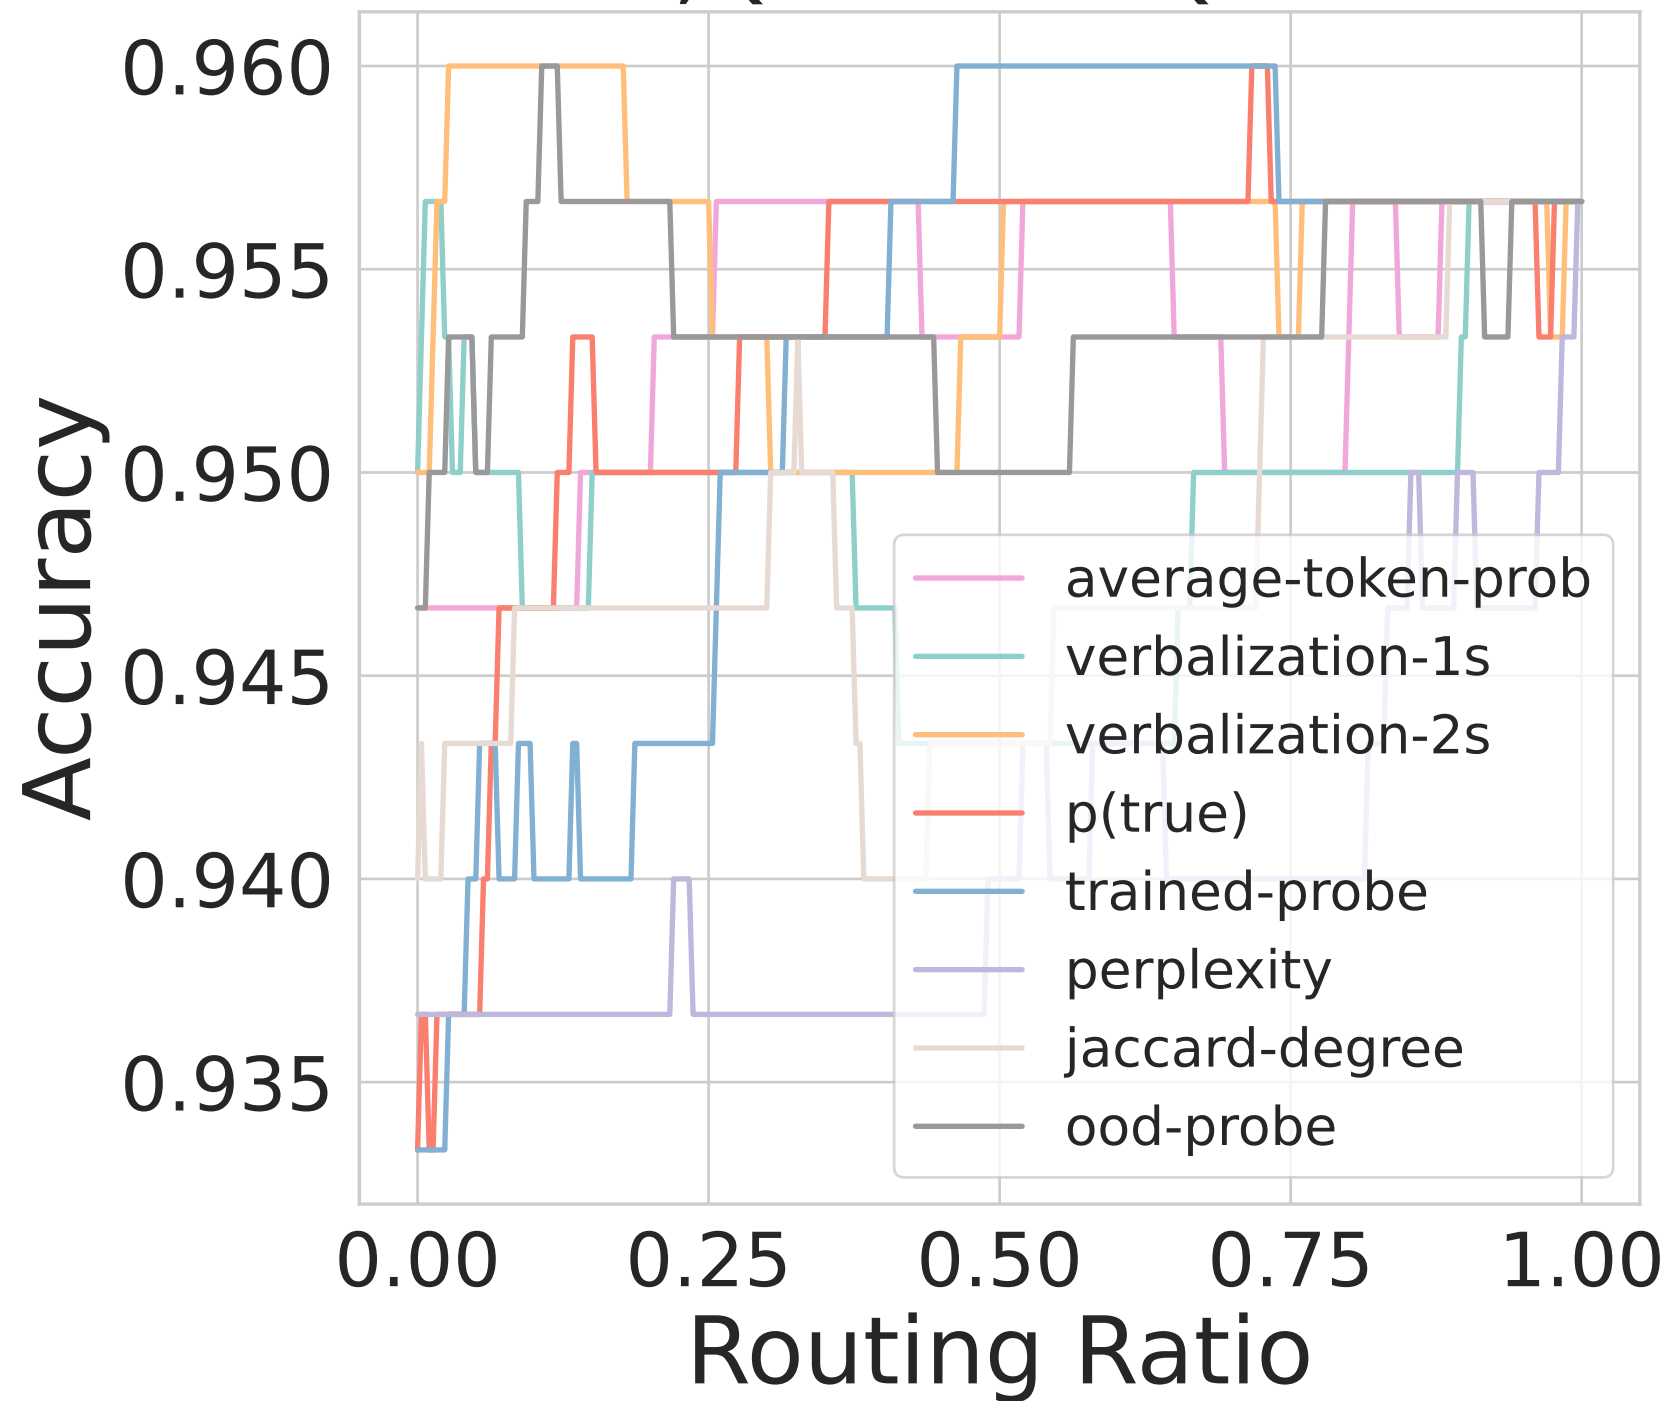

Supplement: supplementary_material [file rr_acc_svamp_Qwen3-4B_qwen32.pdf › Routing_SLM_LLMs/Uncertainty-based Routing/w_legend/to_qwen32/rr_acc_svamp_Qwen3-4B_qwen32.pdf]

# SVAMP, granite-3.1-8b to Qwen3-32B

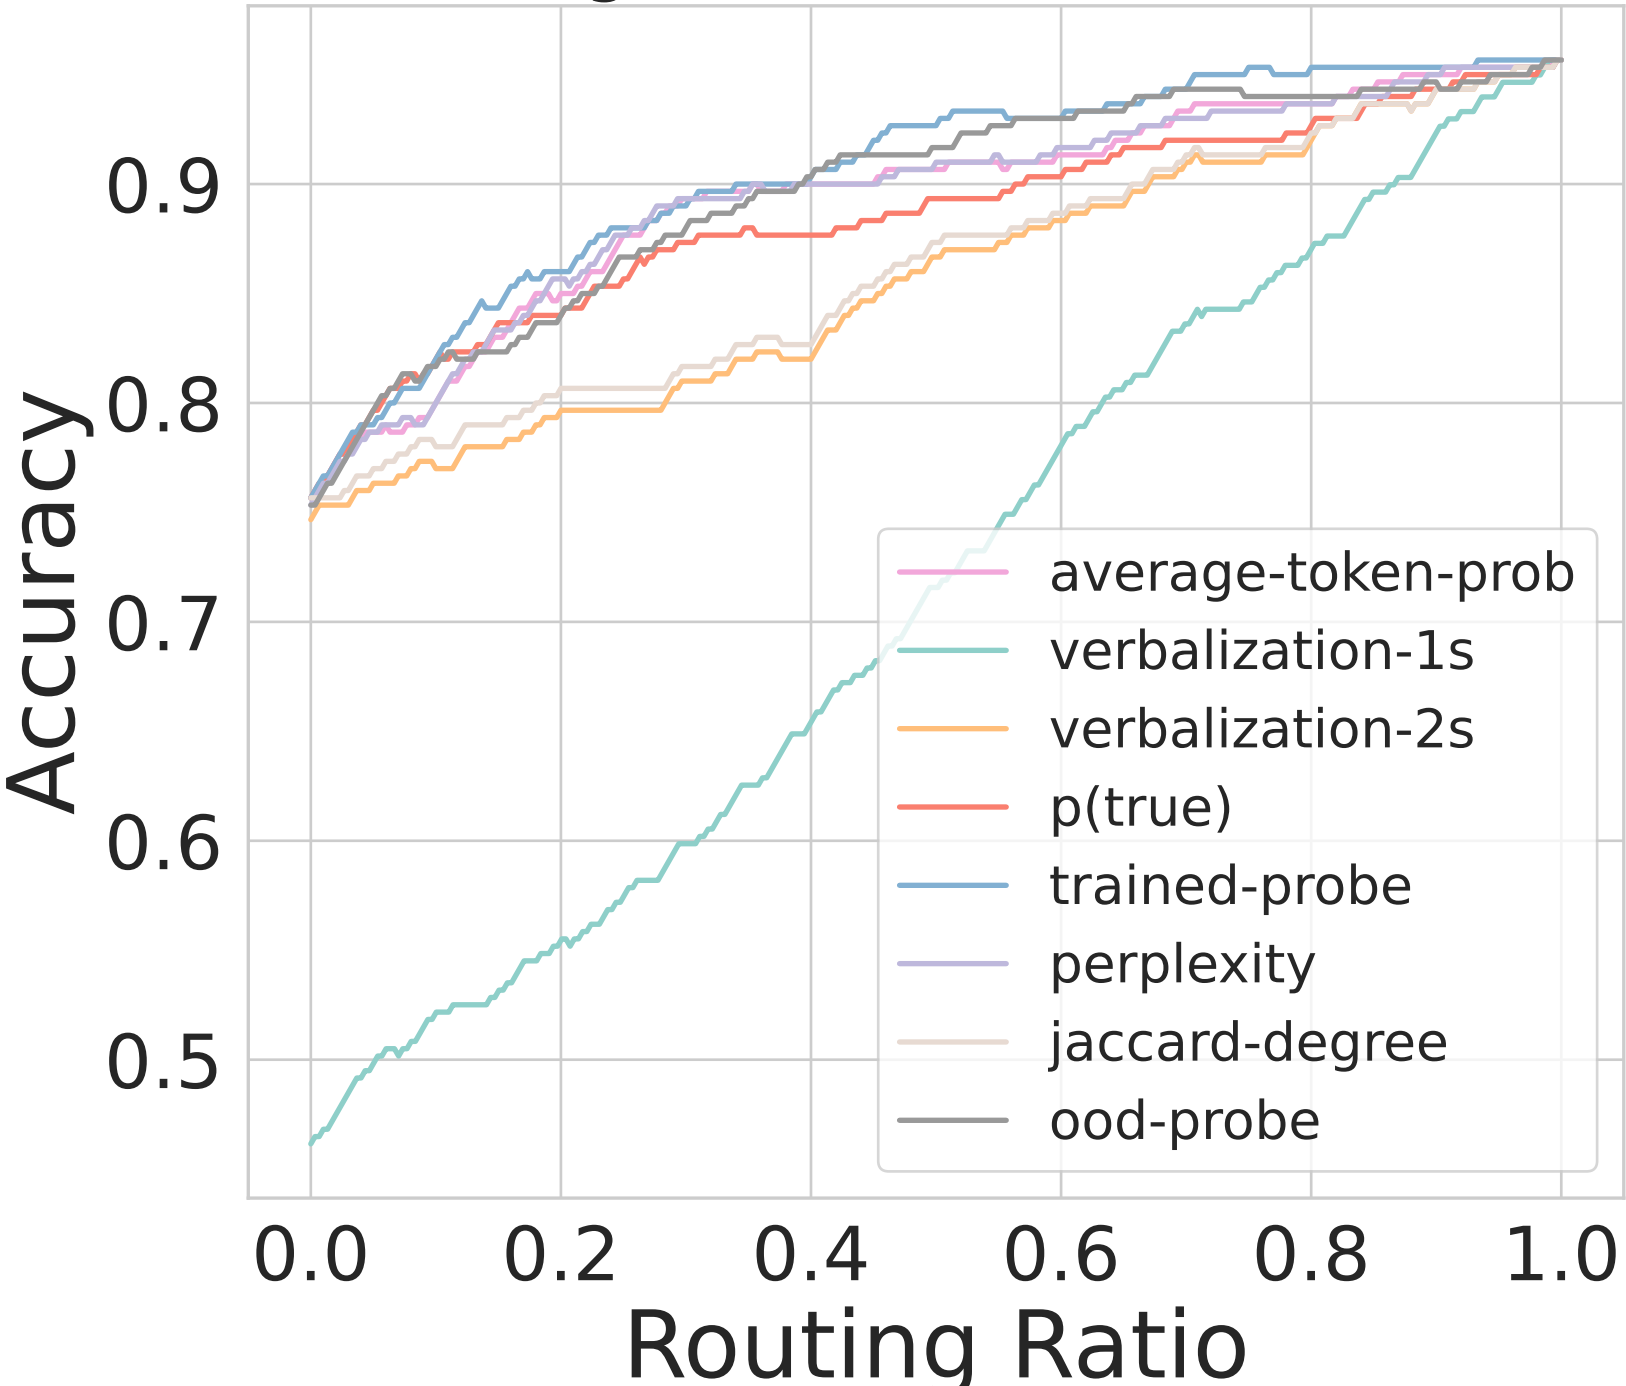

Supplement: supplementary_material [file rr_acc_svamp_granite-3.1-8b_qwen32.pdf › Routing_SLM_LLMs/Uncertainty-based Routing/w_legend/to_qwen32/rr_acc_svamp_granite-3.1-8b_qwen32.pdf]

**SVAMP, llama-3.1-8b to Qwen3-32B**

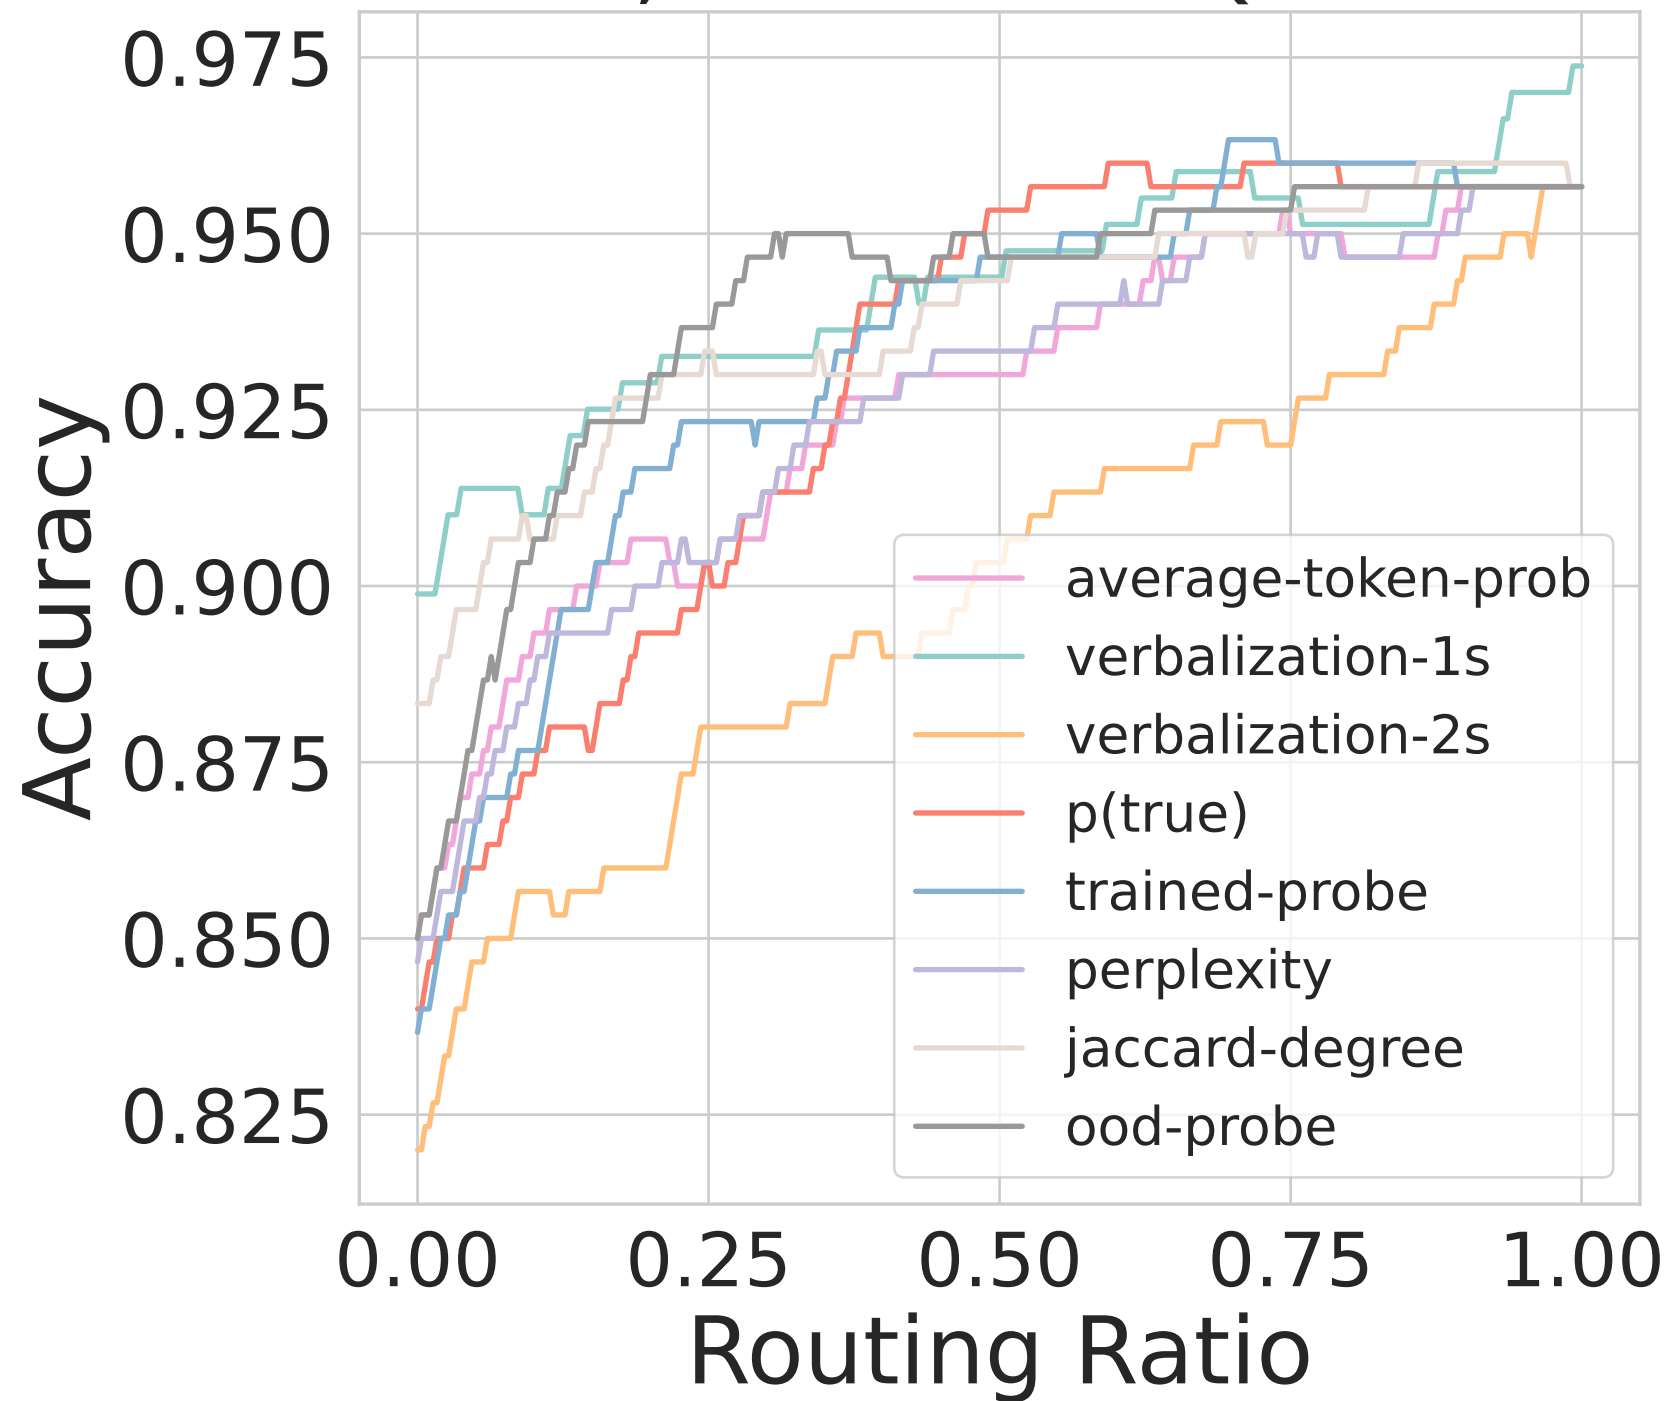

Supplement: supplementary_material [file rr_acc_svamp_llama-3.1-8b_qwen32.pdf › Routing_SLM_LLMs/Uncertainty-based Routing/w_legend/to_qwen32/rr_acc_svamp_llama-3.1-8b_qwen32.pdf]

# SVAMP, llama-3.2-1b to Qwen3-32B

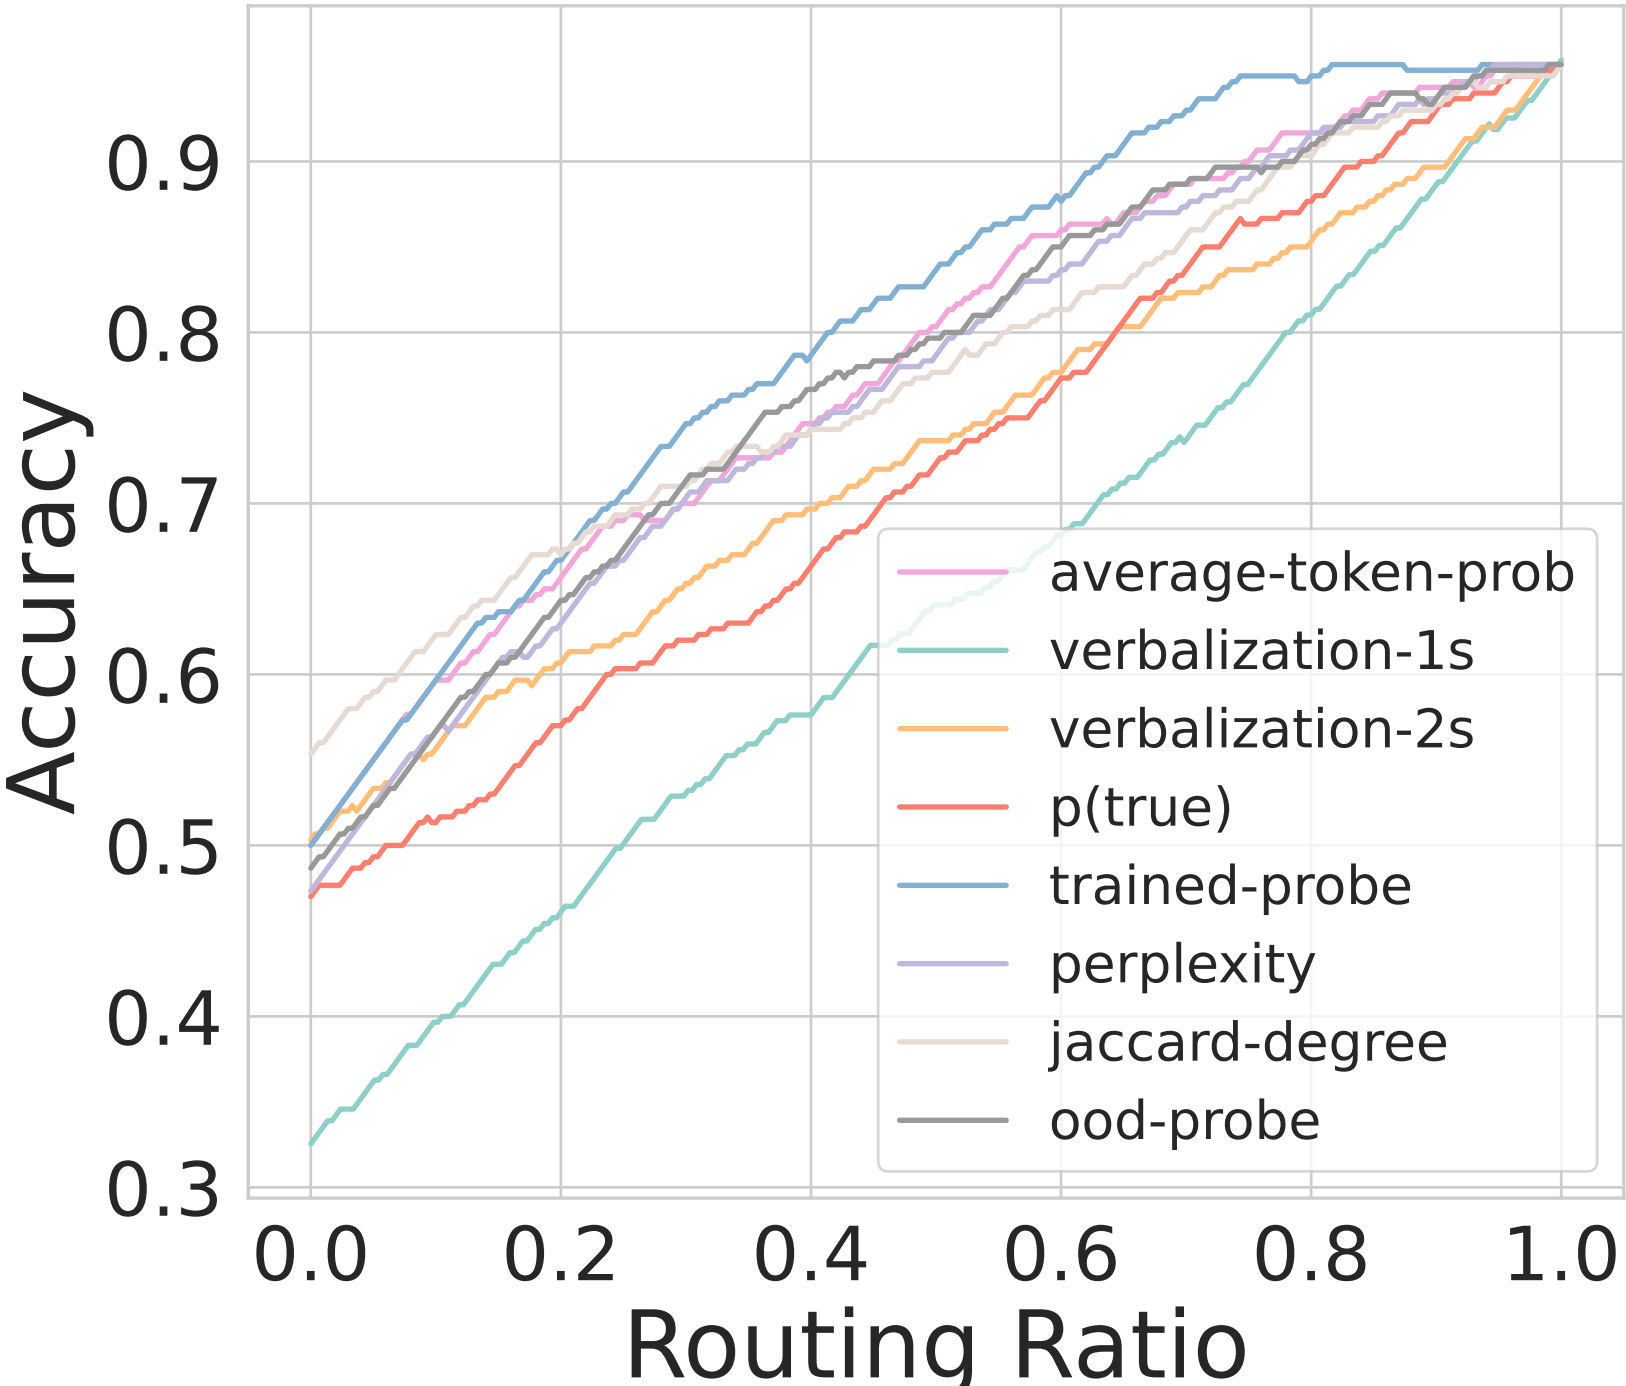

Supplement: supplementary_material [file rr_acc_svamp_llama-3.2-1b_qwen32.pdf › Routing_SLM_LLMs/Uncertainty-based Routing/w_legend/to_qwen32/rr_acc_svamp_llama-3.2-1b_qwen32.pdf]

# SVAMP, llama-3.2-3b to Qwen3-32B

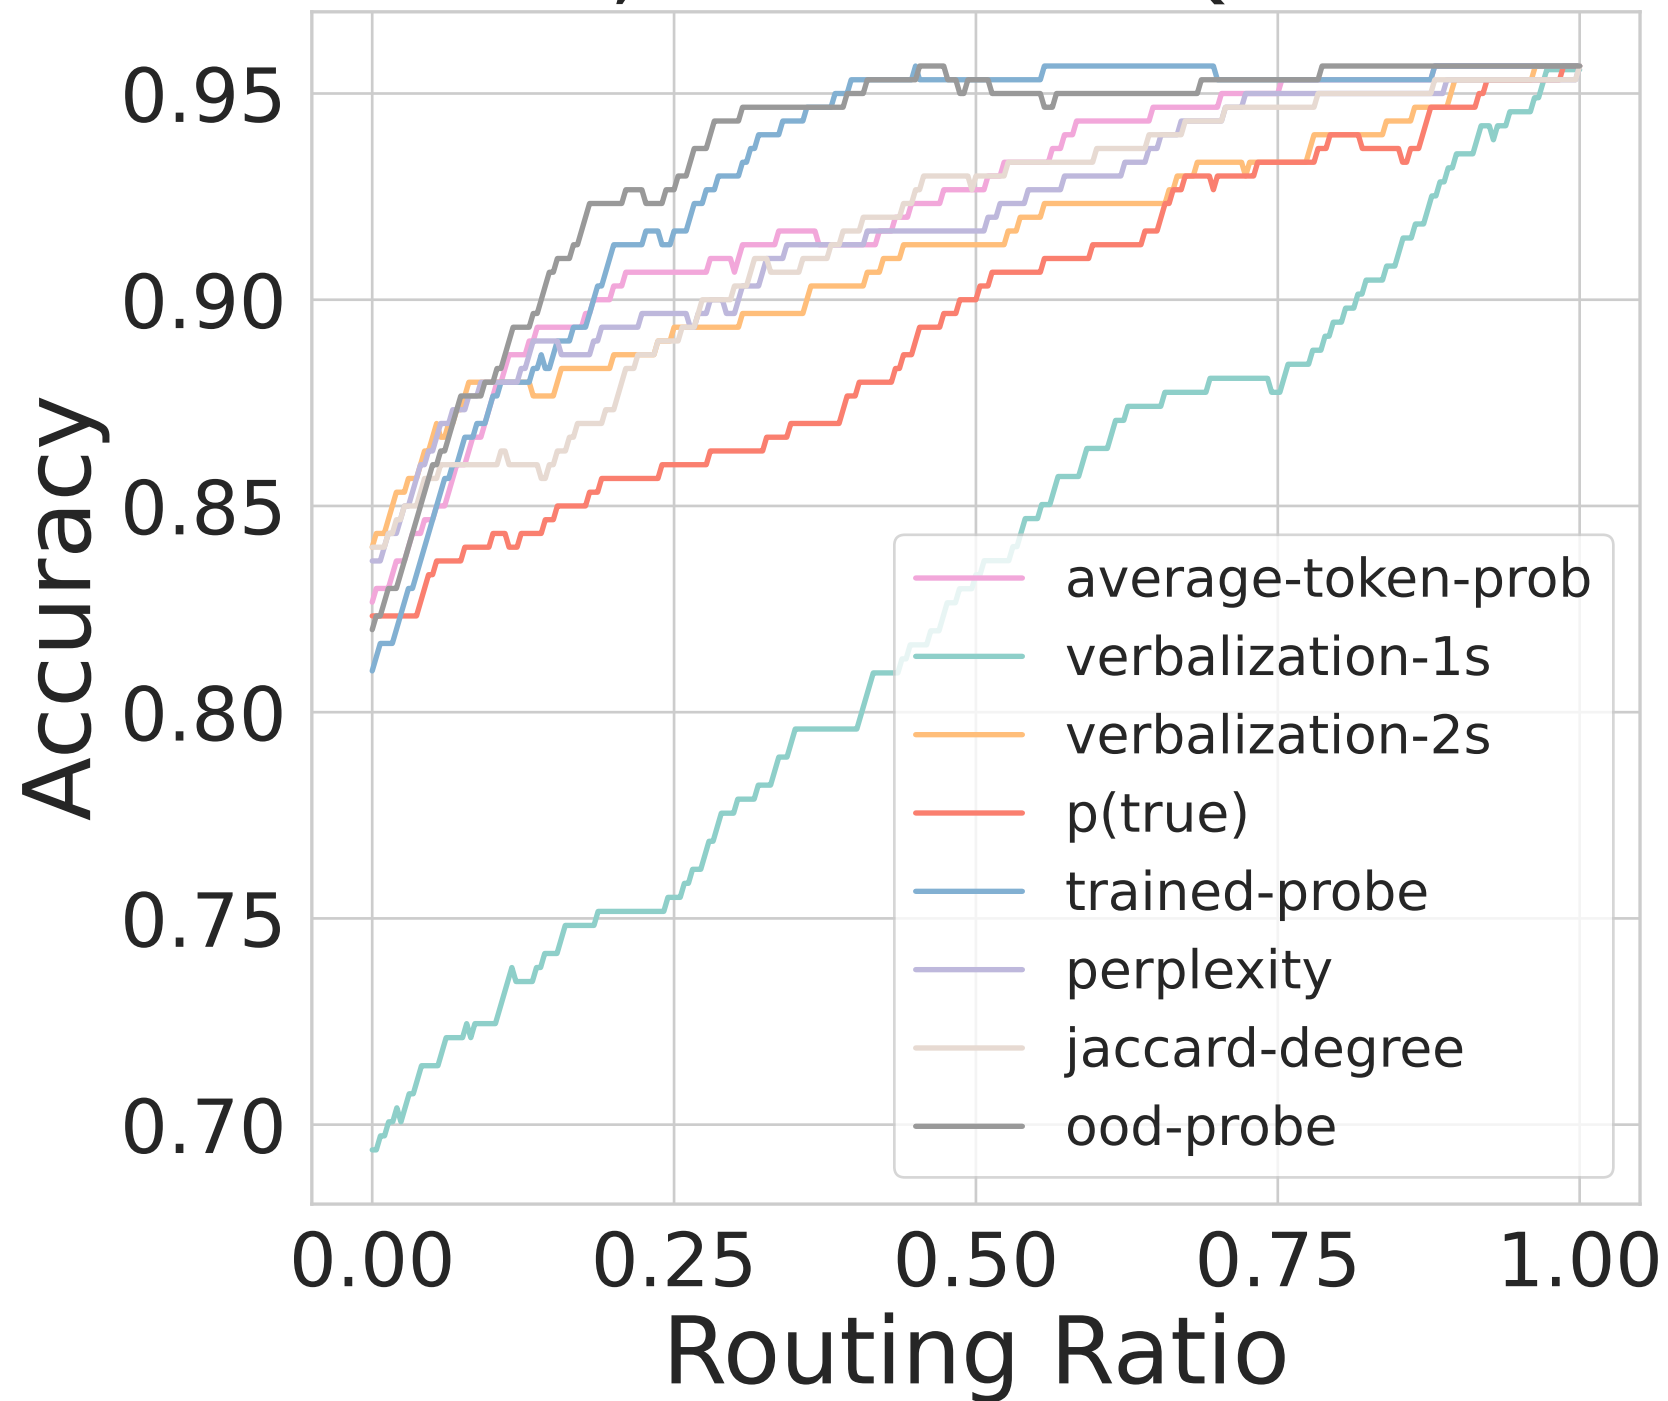

Supplement: supplementary_material [file rr_acc_svamp_llama-3.2-3b_qwen32.pdf › Routing_SLM_LLMs/Uncertainty-based Routing/w_legend/to_qwen32/rr_acc_svamp_llama-3.2-3b_qwen32.pdf]

**SVAMP, mistral-7b to Qwen3-32B**

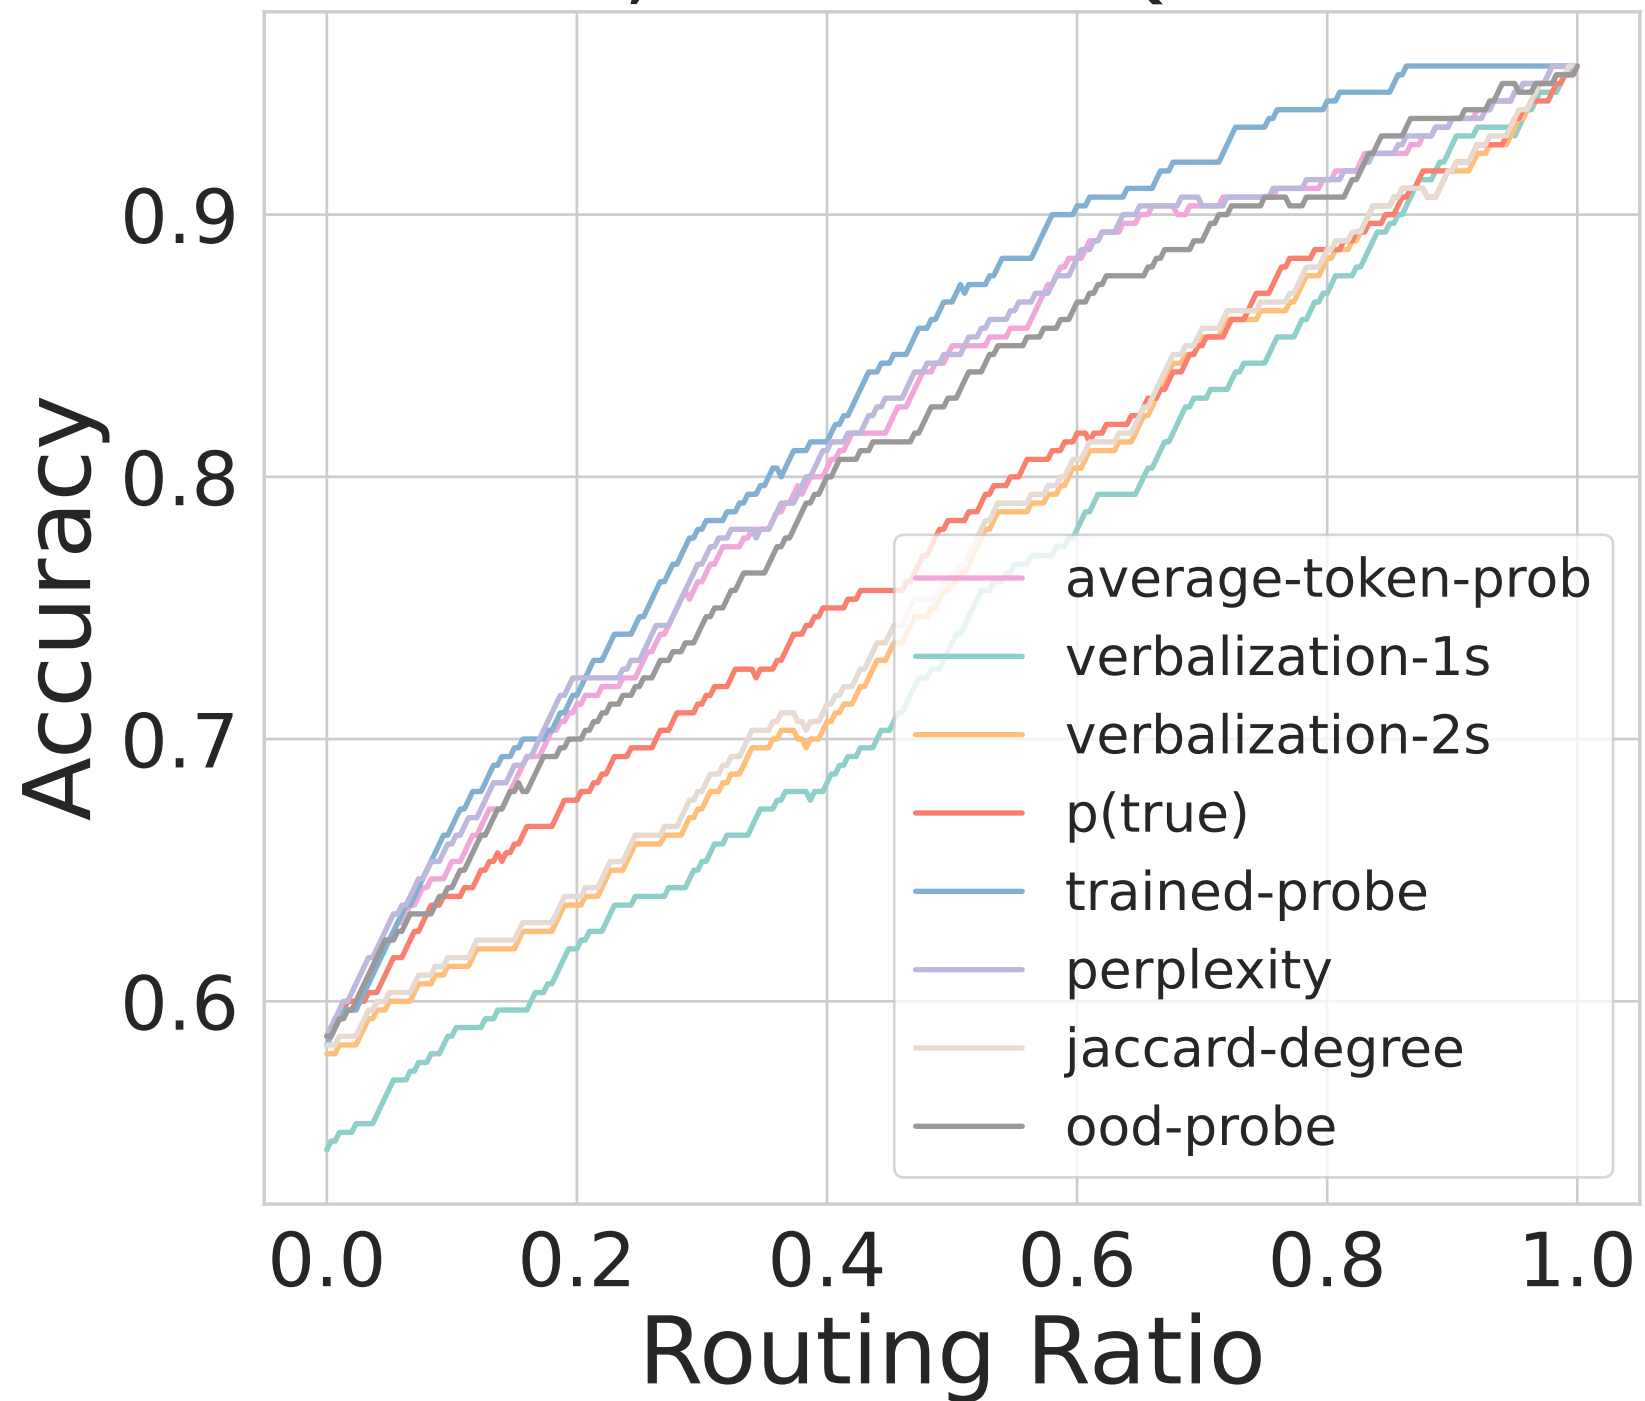

Supplement: supplementary_material [file rr_acc_svamp_mistral-7b_qwen32.pdf › Routing_SLM_LLMs/Uncertainty-based Routing/w_legend/to_qwen32/rr_acc_svamp_mistral-7b_qwen32.pdf]

# SVAMP, phi-3.5-mini to Qwen3-32B

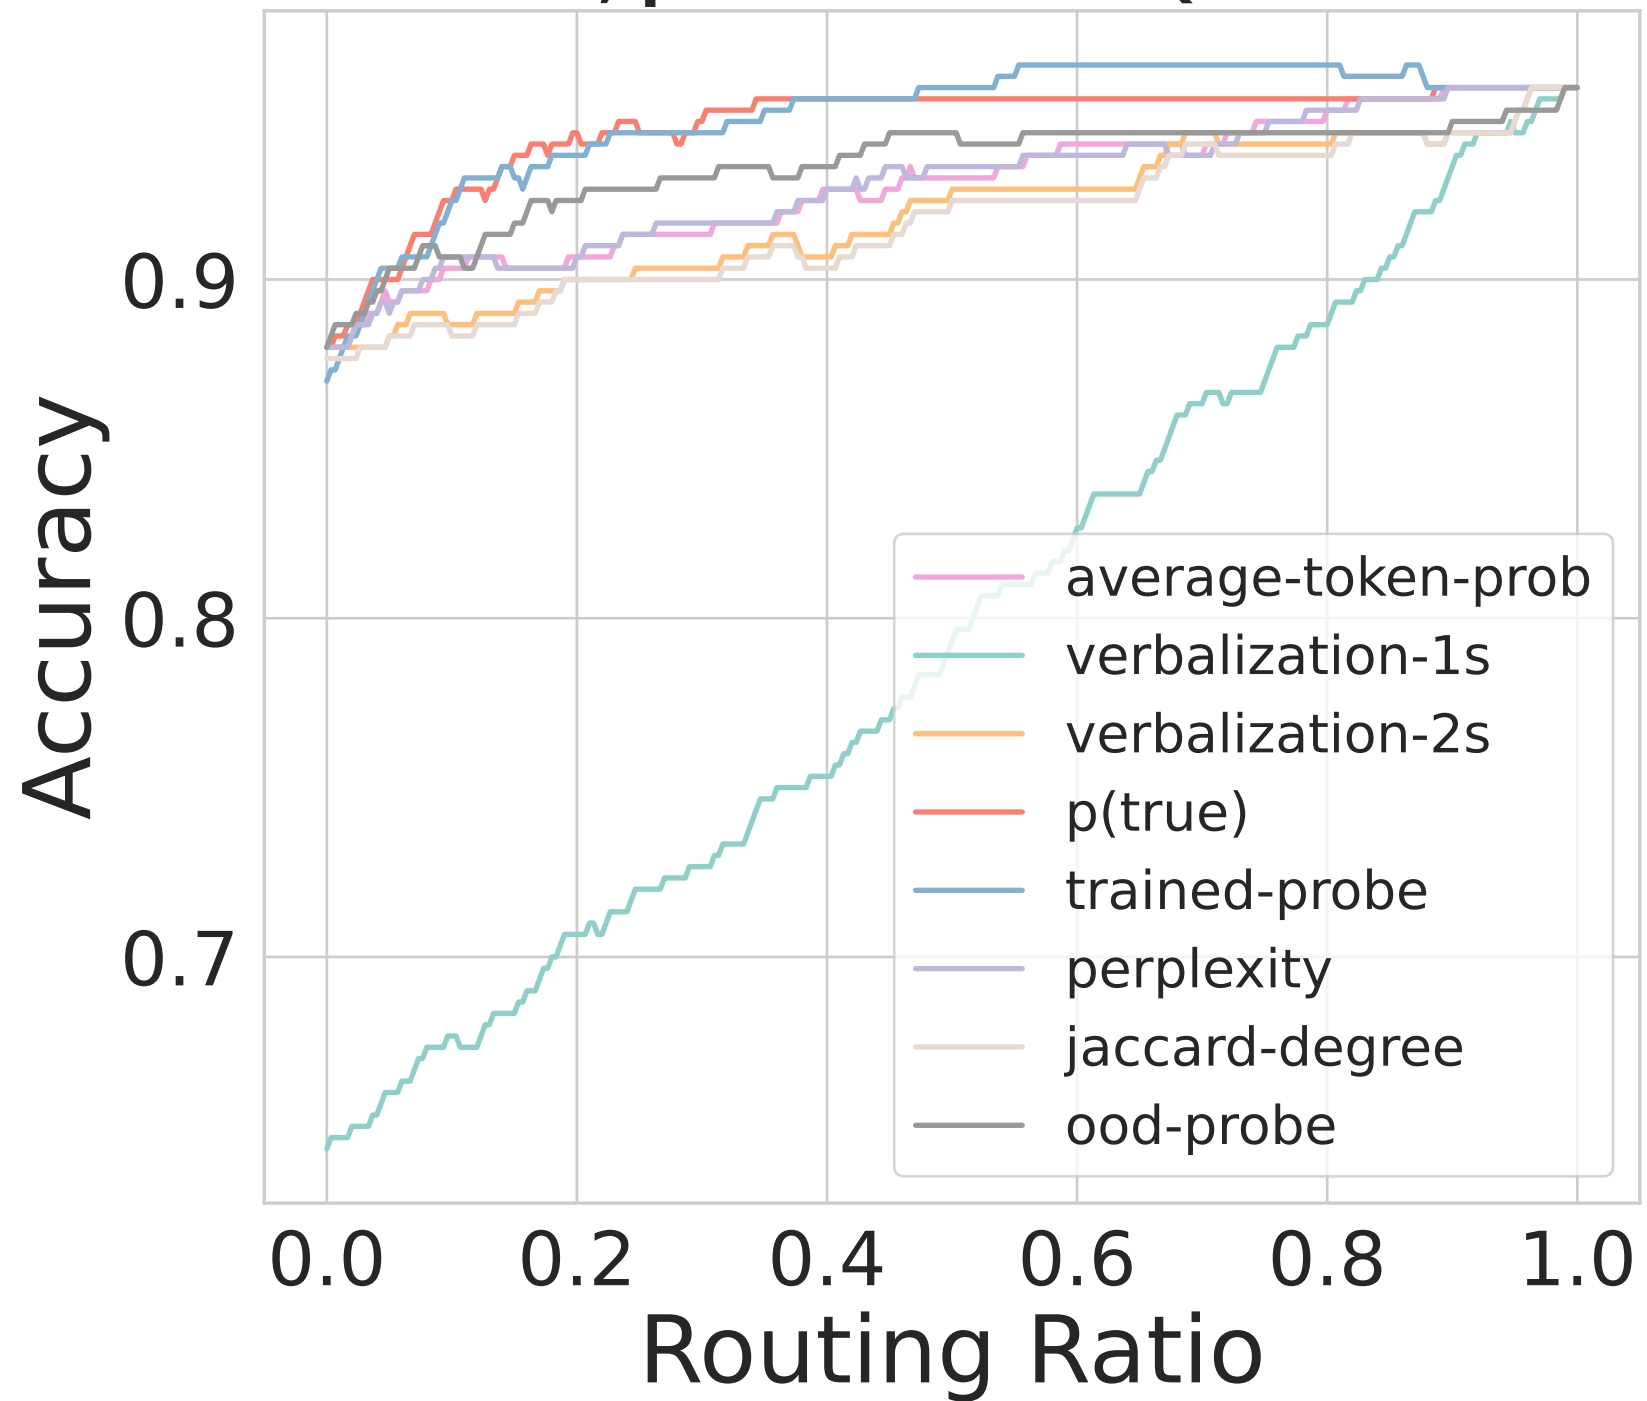

Supplement: supplementary_material [file rr_acc_svamp_phi-3.5-mini_qwen32.pdf › Routing_SLM_LLMs/Uncertainty-based Routing/w_legend/to_qwen32/rr_acc_svamp_phi-3.5-mini_qwen32.pdf]

# SVAMP, phi-4-mini-reasoning to Qwen3-32B

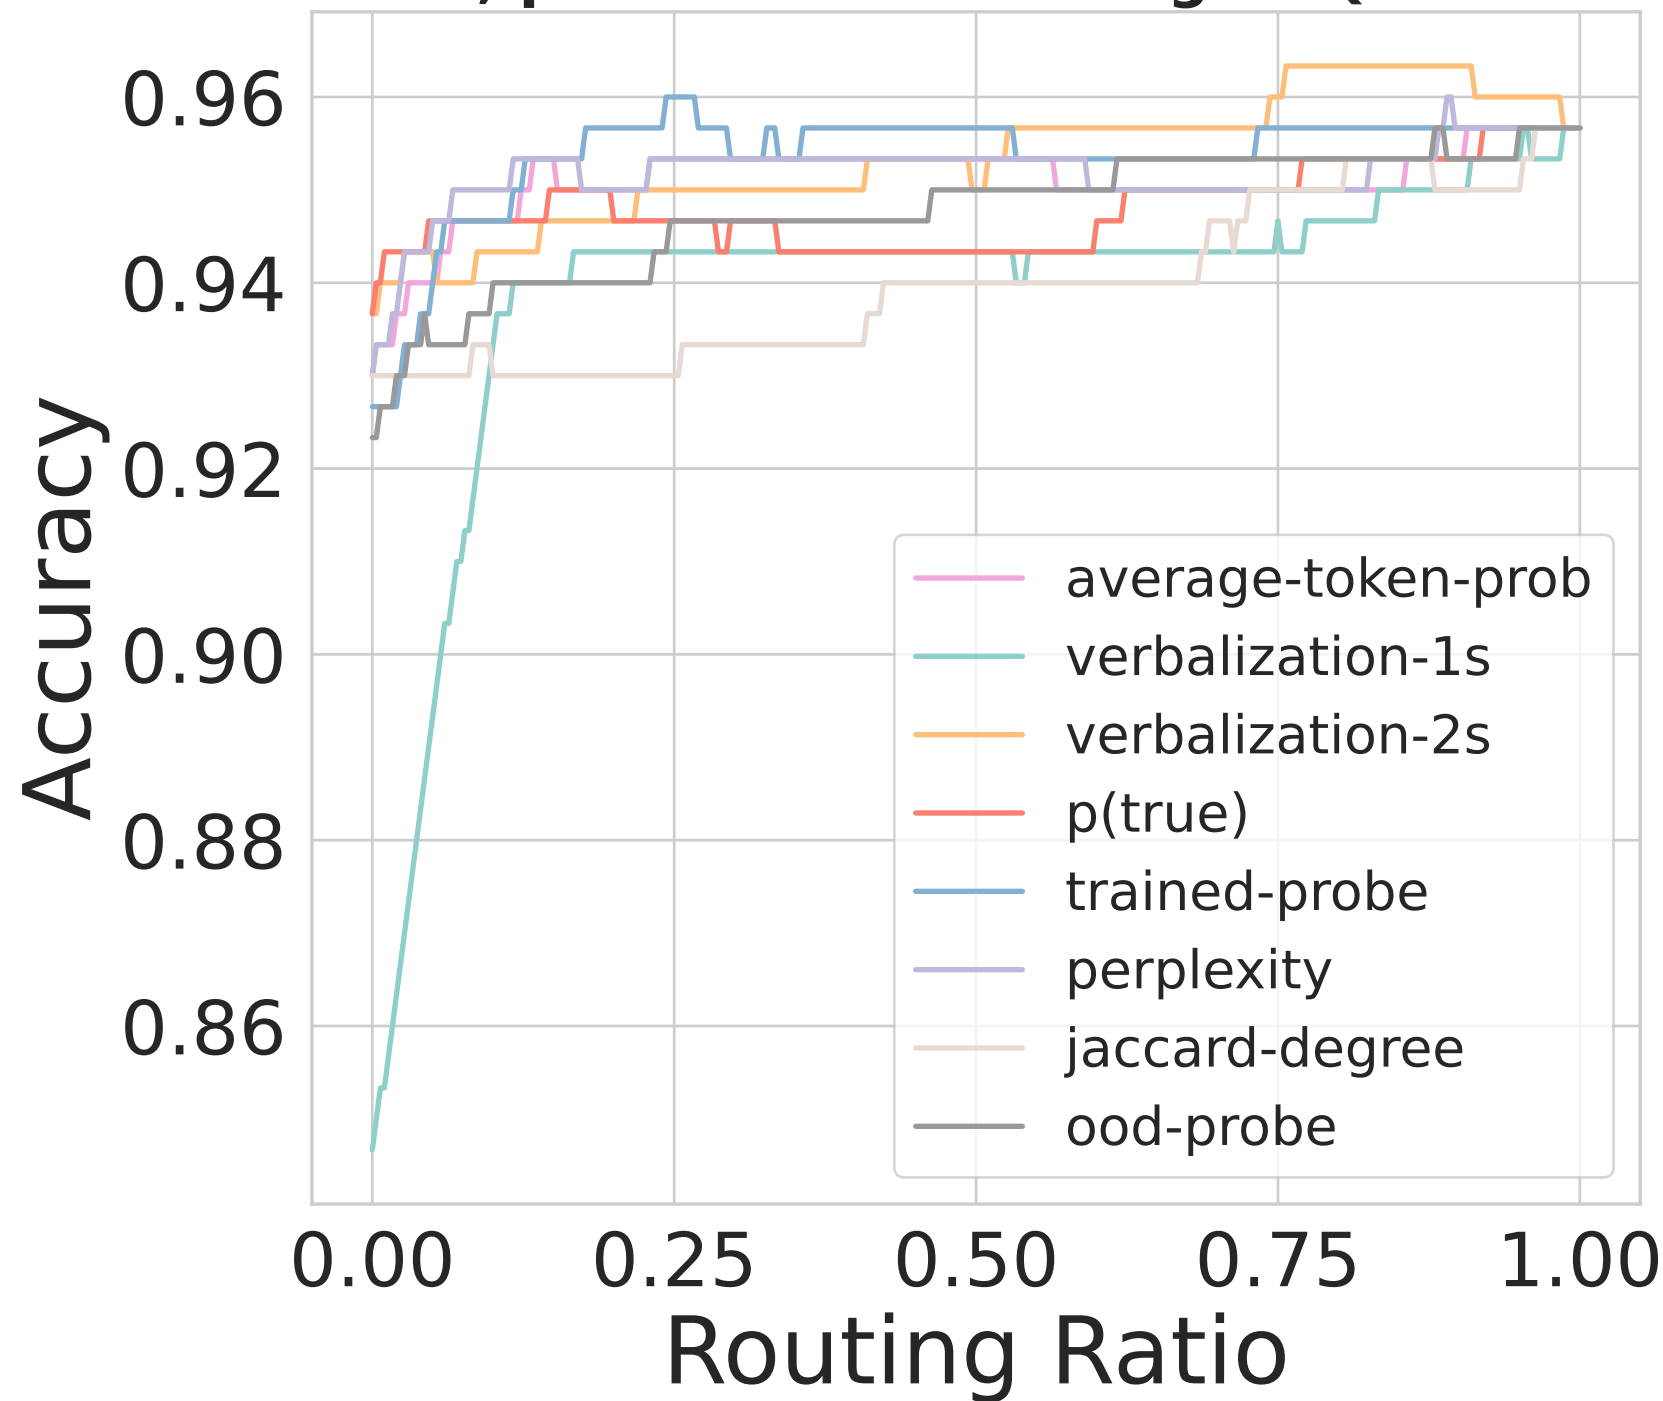

Supplement: supplementary_material [file rr_acc_svamp_phi-4-mini-reasoning_qwen32.pdf › Routing_SLM_LLMs/Uncertainty-based Routing/w_legend/to_qwen32/rr_acc_svamp_phi-4-mini-reasoning_qwen32.pdf]

# SVAMP, rwkv to Qwen3-32B

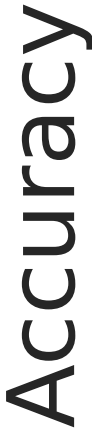

verbalization-1s

 $p(\text{true})$ 

perplexity

ood-probe

Supplement: supplementary_material [file rr_acc_svamp_rwkv_qwen32.pdf › Routing_SLM_LLMs/Uncertainty-based Routing/w_legend/to_qwen32/rr_acc_svamp_rwkv_qwen32.pdf]

## TruthfulQA, Qwen3-1.7B to Qwen3-32B

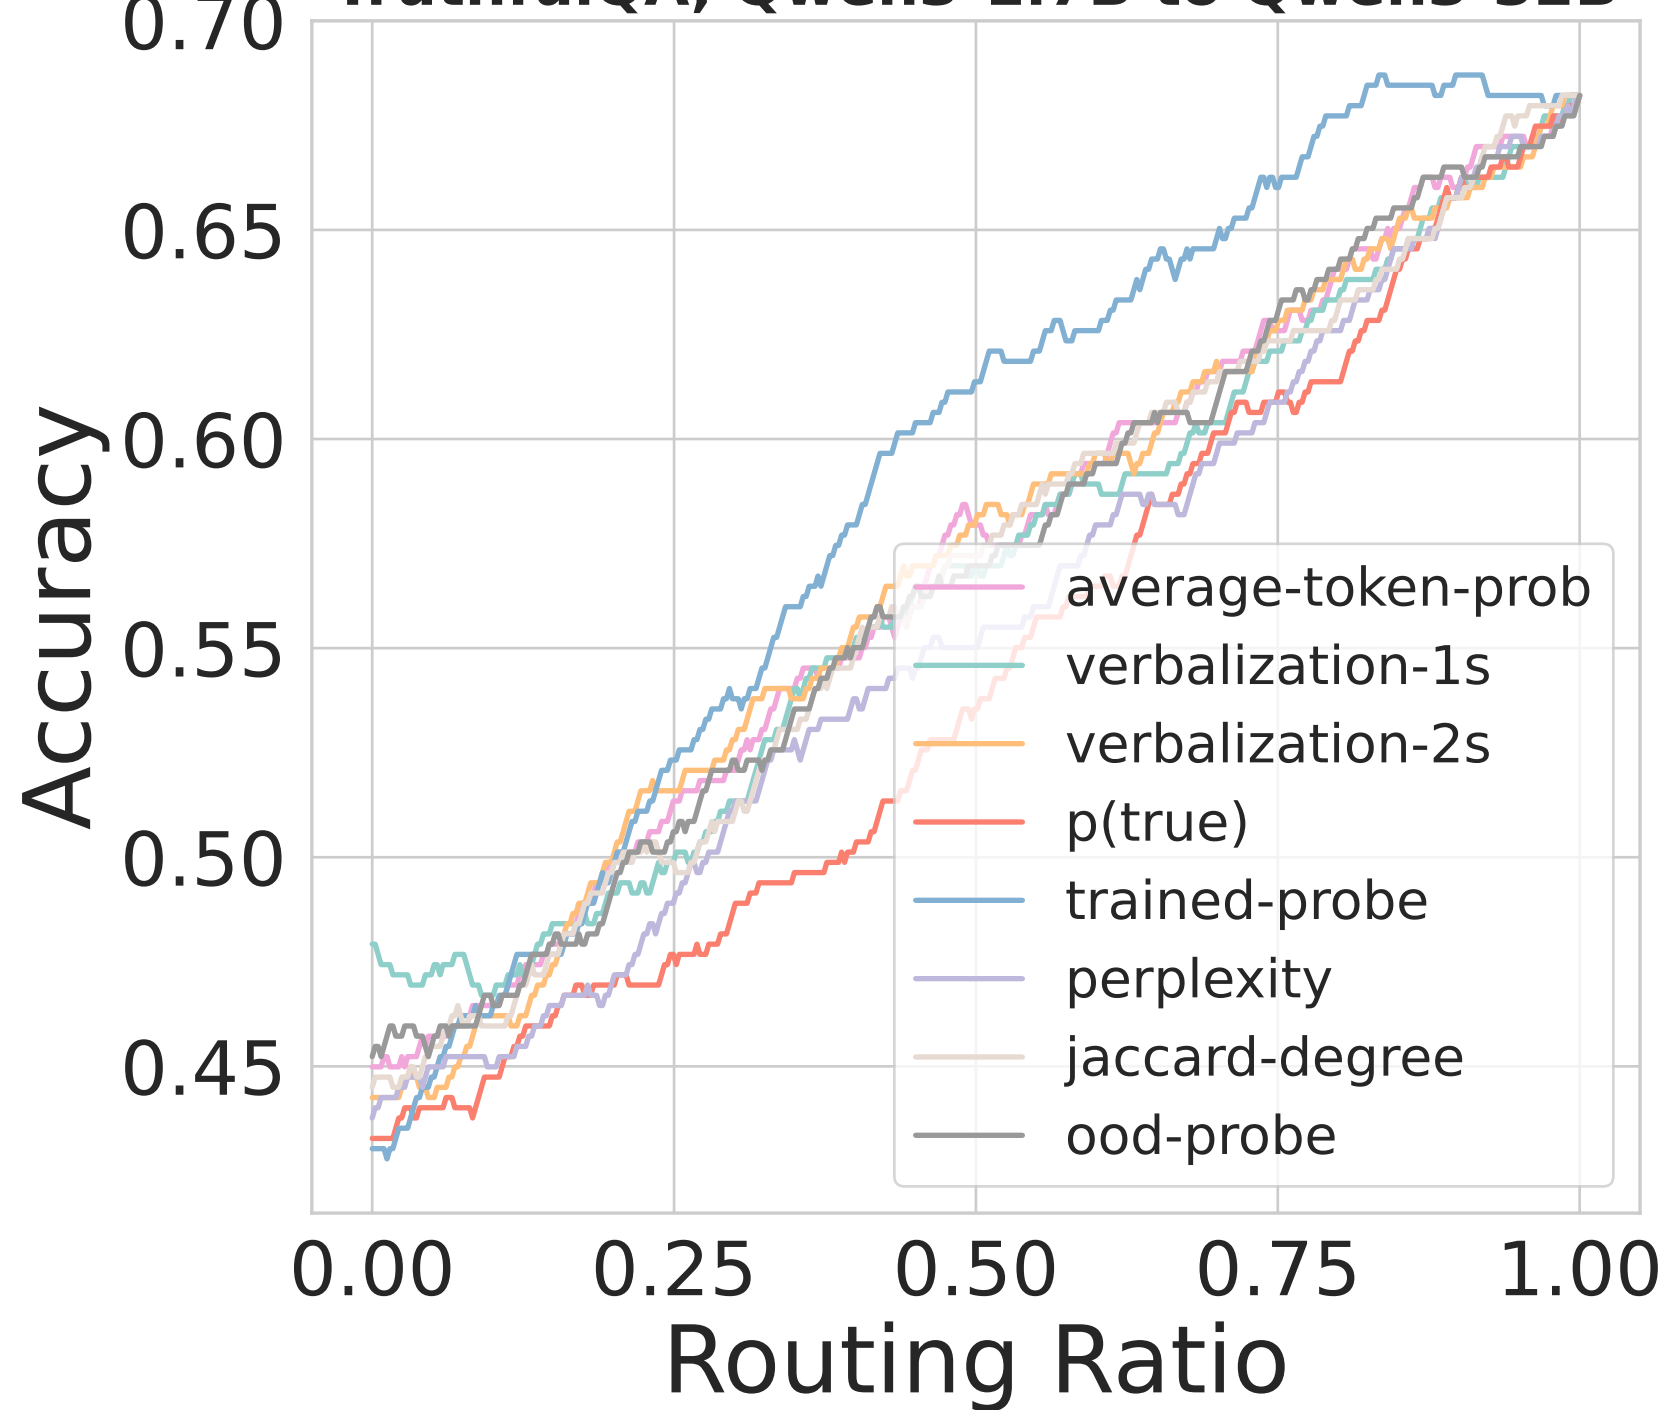

Supplement: supplementary_material [file rr_acc_truthful_qa_Qwen3-1.7B_qwen32.pdf › Routing_SLM_LLMs/Uncertainty-based Routing/w_legend/to_qwen32/rr_acc_truthful_qa_Qwen3-1.7B_qwen32.pdf]

TruthfulQA, Qwen3-4B to Qwen3-32B

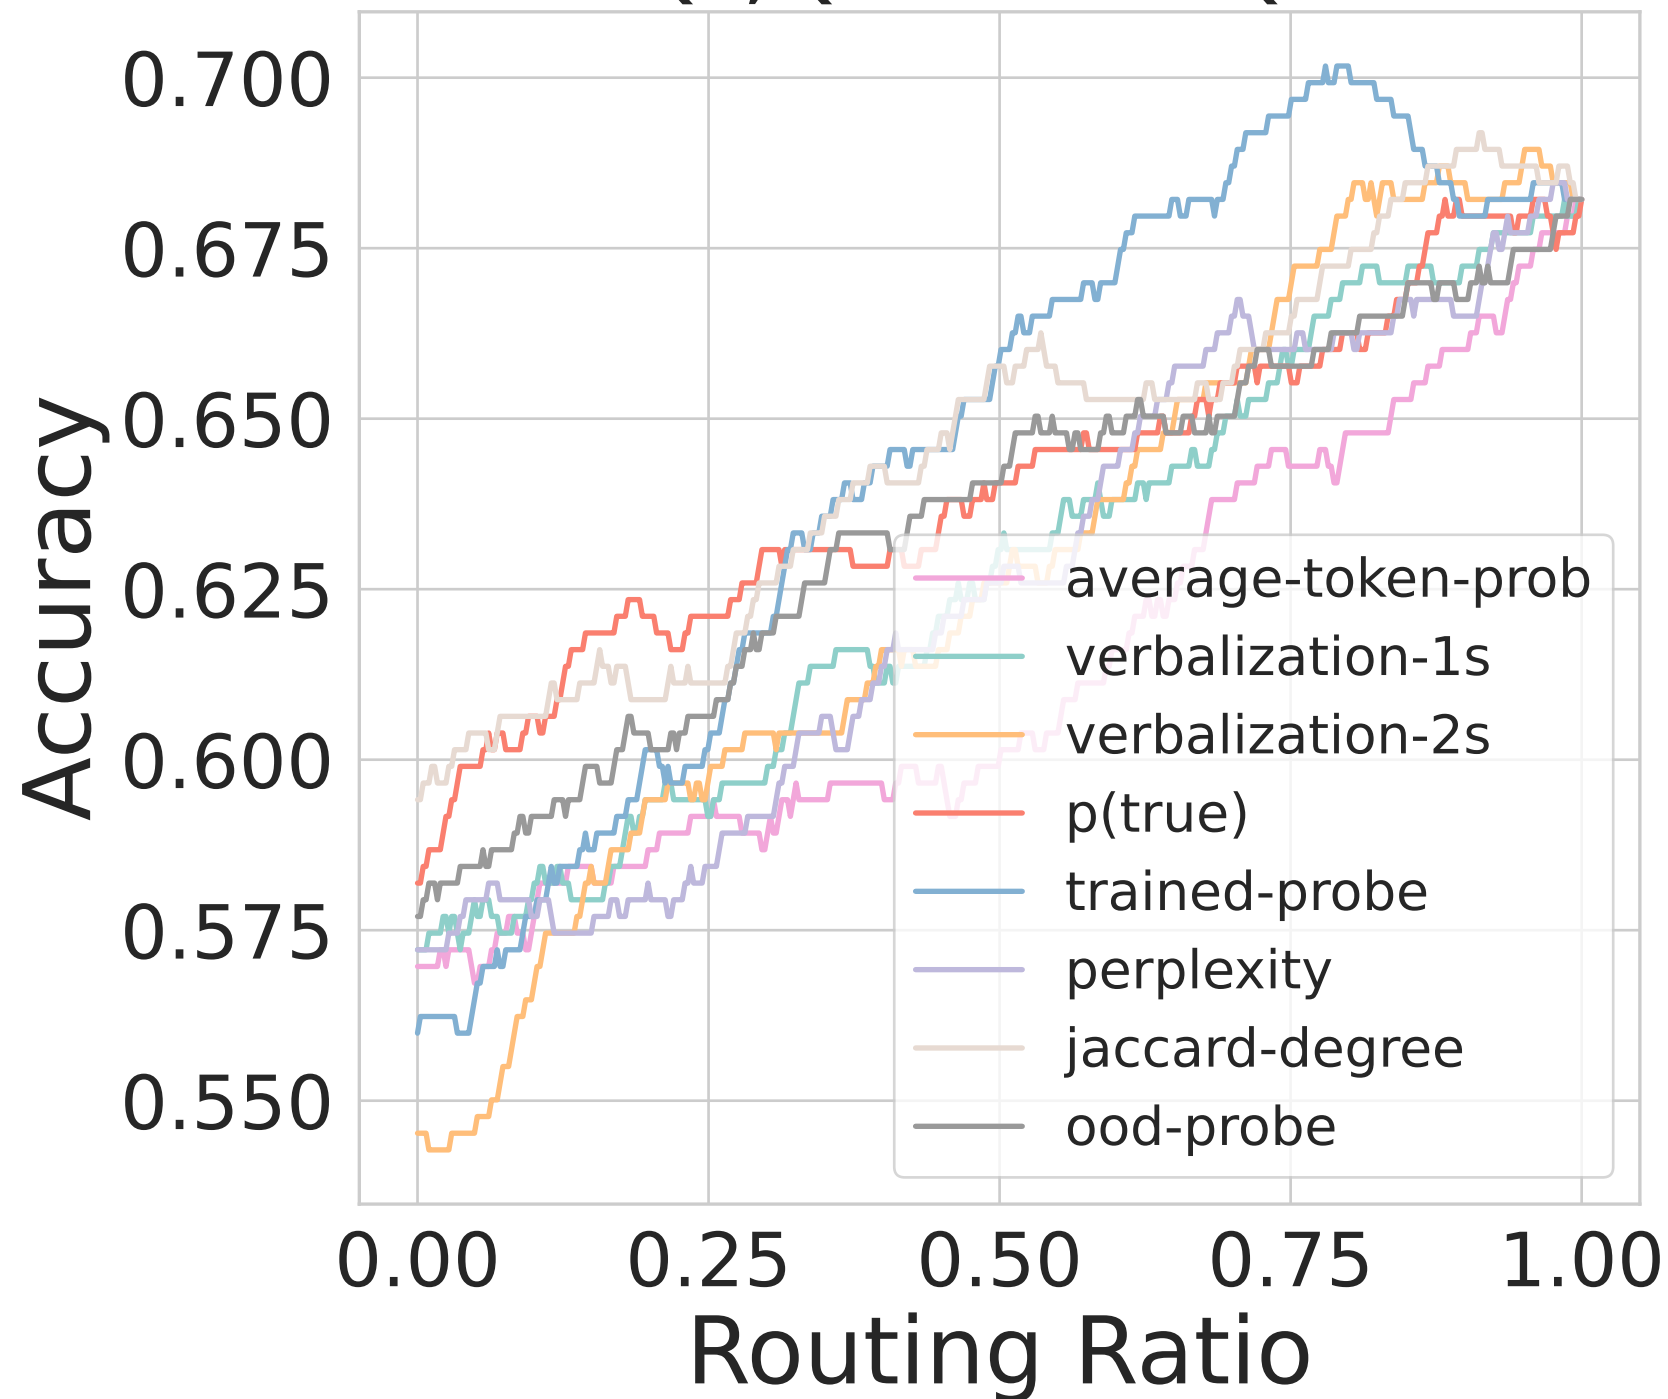

Supplement: supplementary_material [file rr_acc_truthful_qa_Qwen3-4B_qwen32.pdf › Routing_SLM_LLMs/Uncertainty-based Routing/w_legend/to_qwen32/rr_acc_truthful_qa_Qwen3-4B_qwen32.pdf]

# TruthfulQA, granite-3.1-8b to Qwen3-32B

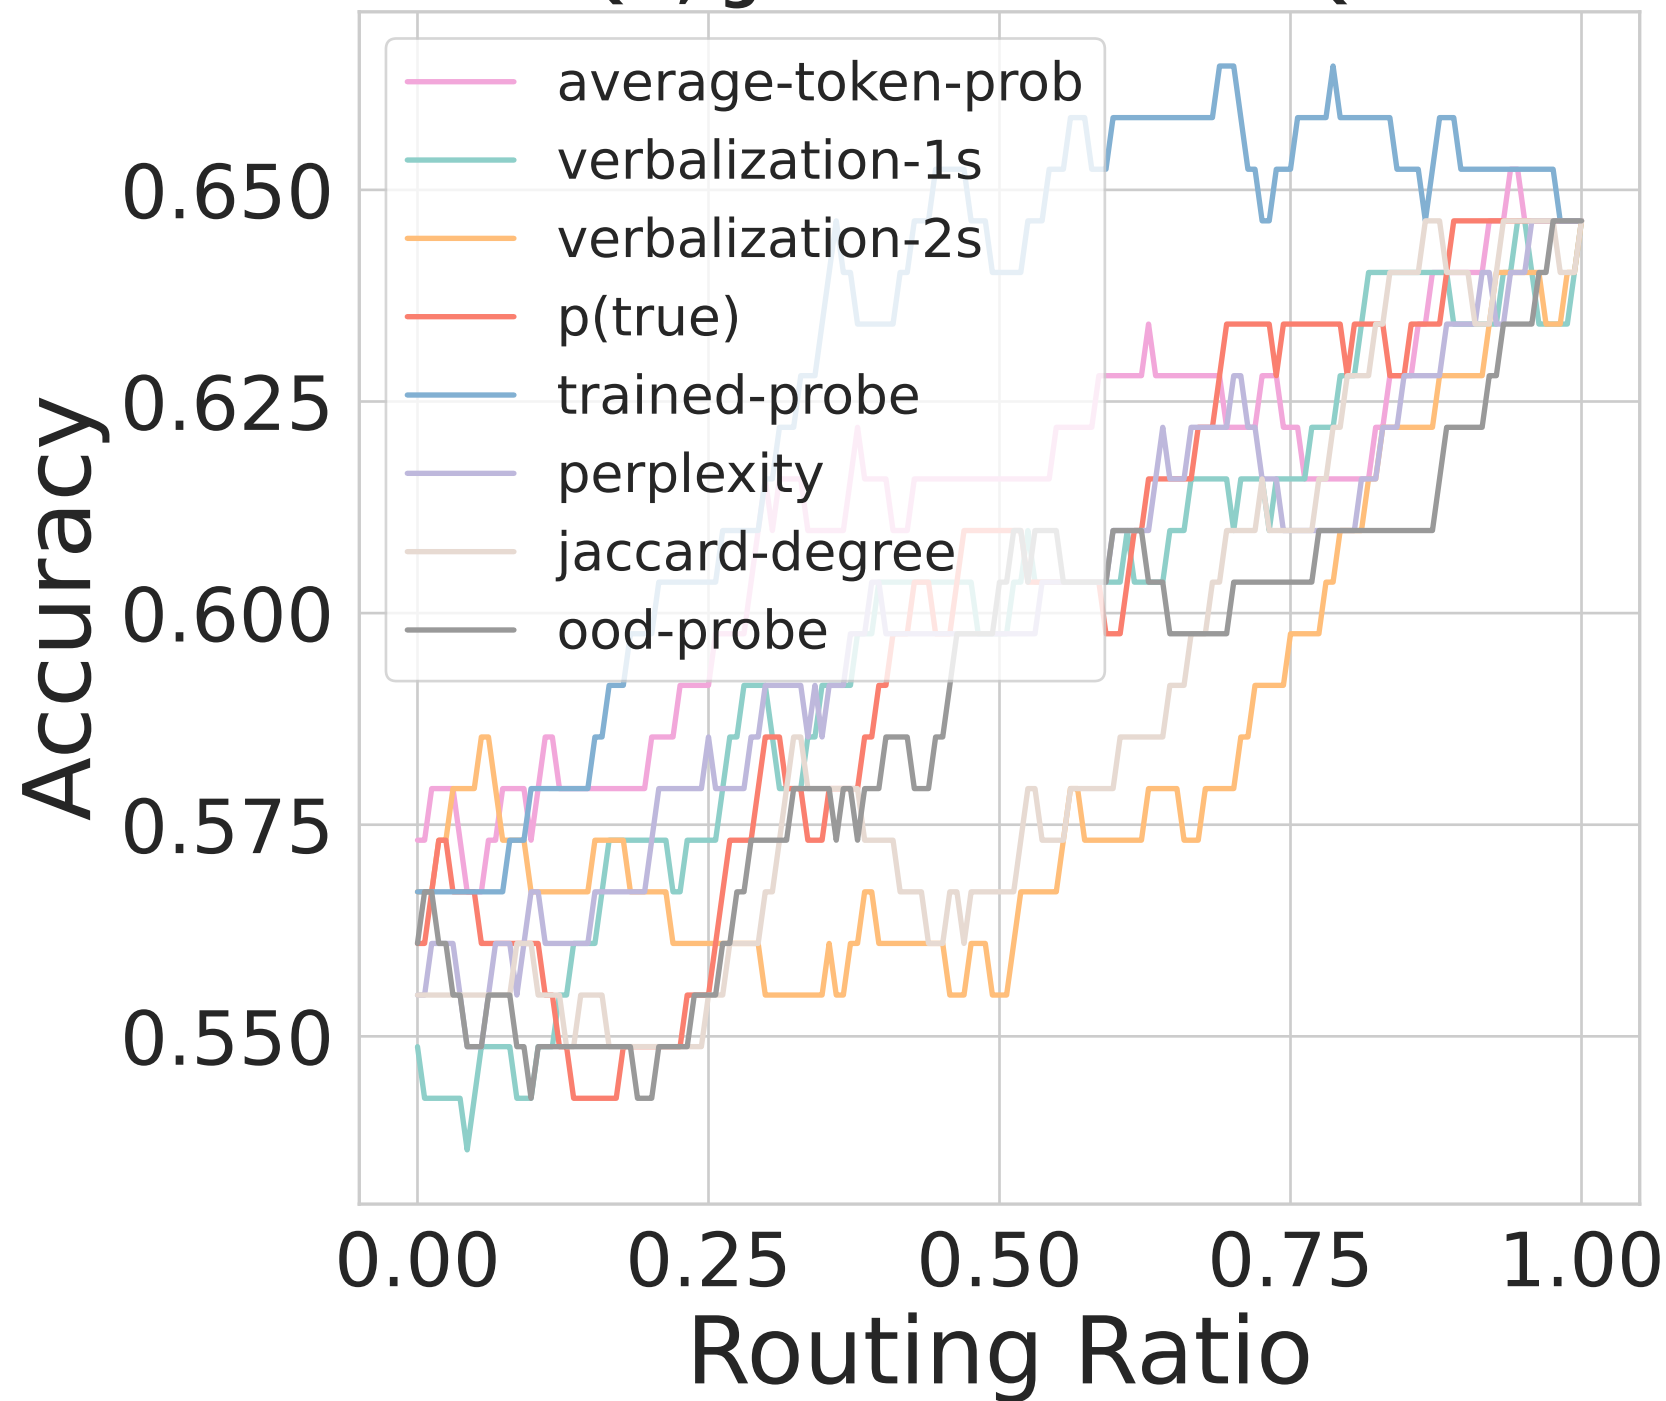

Supplement: supplementary_material [file rr_acc_truthful_qa_granite-3.1-8b_qwen32.pdf › Routing_SLM_LLMs/Uncertainty-based Routing/w_legend/to_qwen32/rr_acc_truthful_qa_granite-3.1-8b_qwen32.pdf]

TruthfulQA, llama-3.1-8b to Qwen3-32B

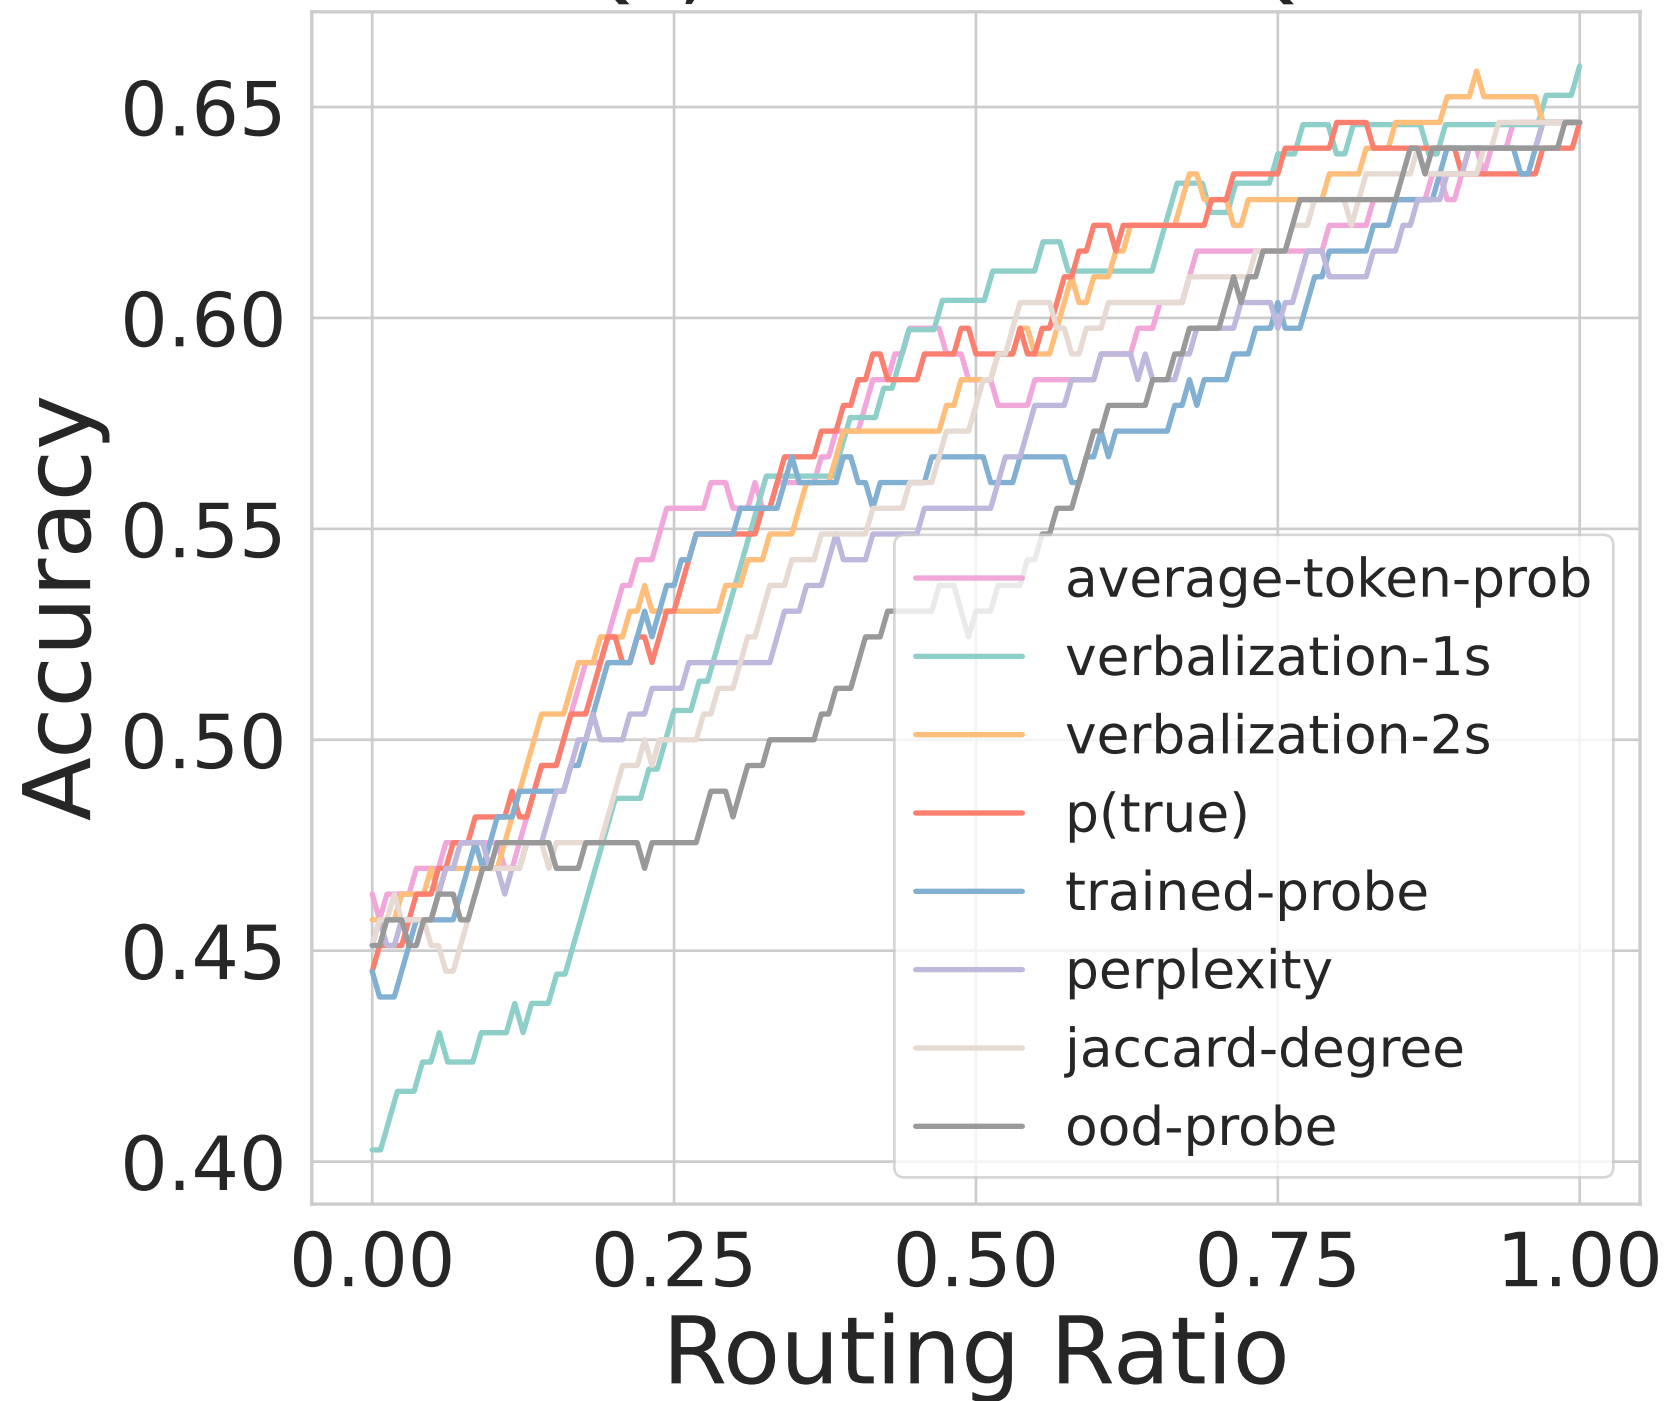

Supplement: supplementary_material [file rr_acc_truthful_qa_llama-3.1-8b_qwen32.pdf › Routing_SLM_LLMs/Uncertainty-based Routing/w_legend/to_qwen32/rr_acc_truthful_qa_llama-3.1-8b_qwen32.pdf]

## TruthfulQA, llama-3.2-3b to Qwen3-32B

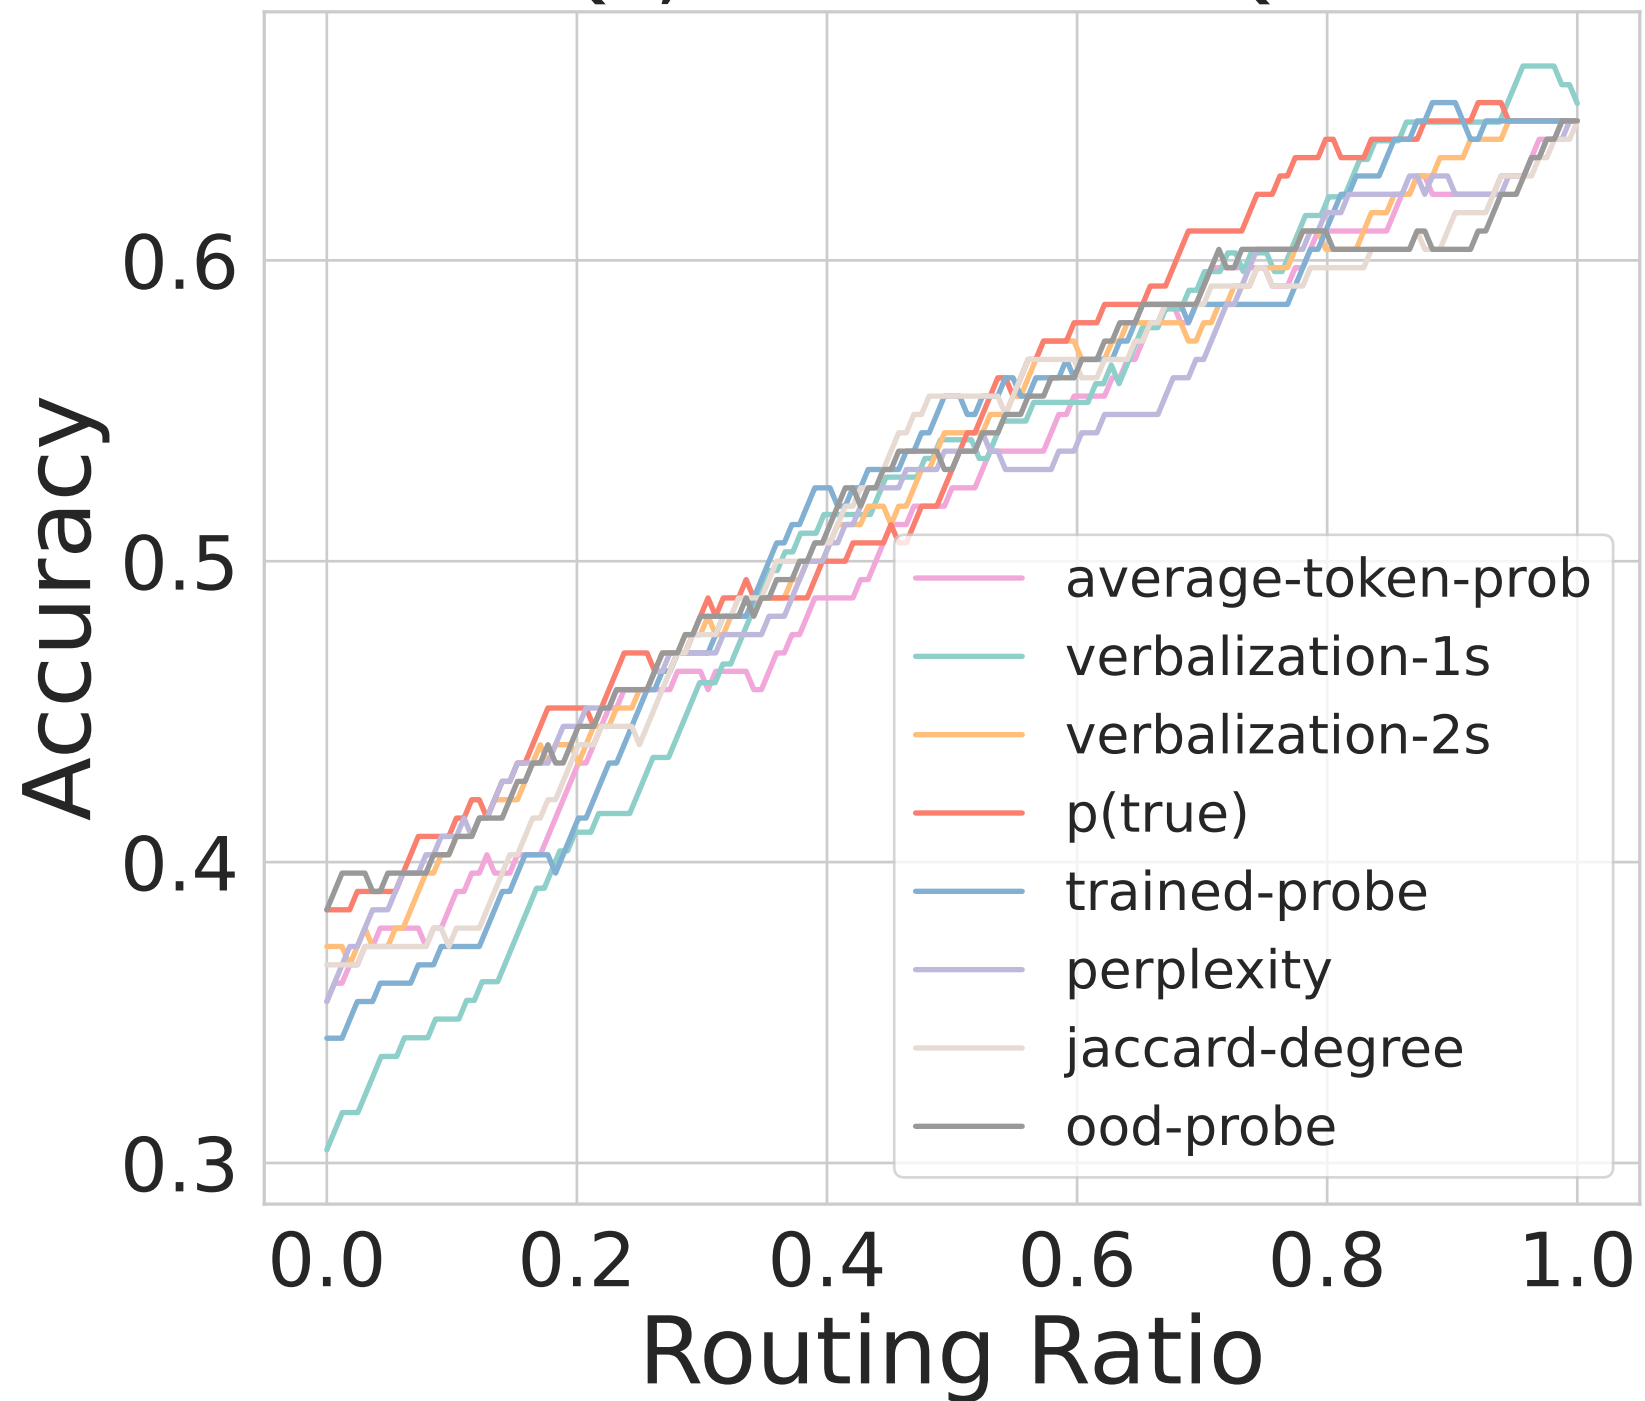

Supplement: supplementary_material [file rr_acc_truthful_qa_llama-3.2-3b_qwen32.pdf › Routing_SLM_LLMs/Uncertainty-based Routing/w_legend/to_qwen32/rr_acc_truthful_qa_llama-3.2-3b_qwen32.pdf]

TruthfulQA, mistral-7b to Qwen3-32B

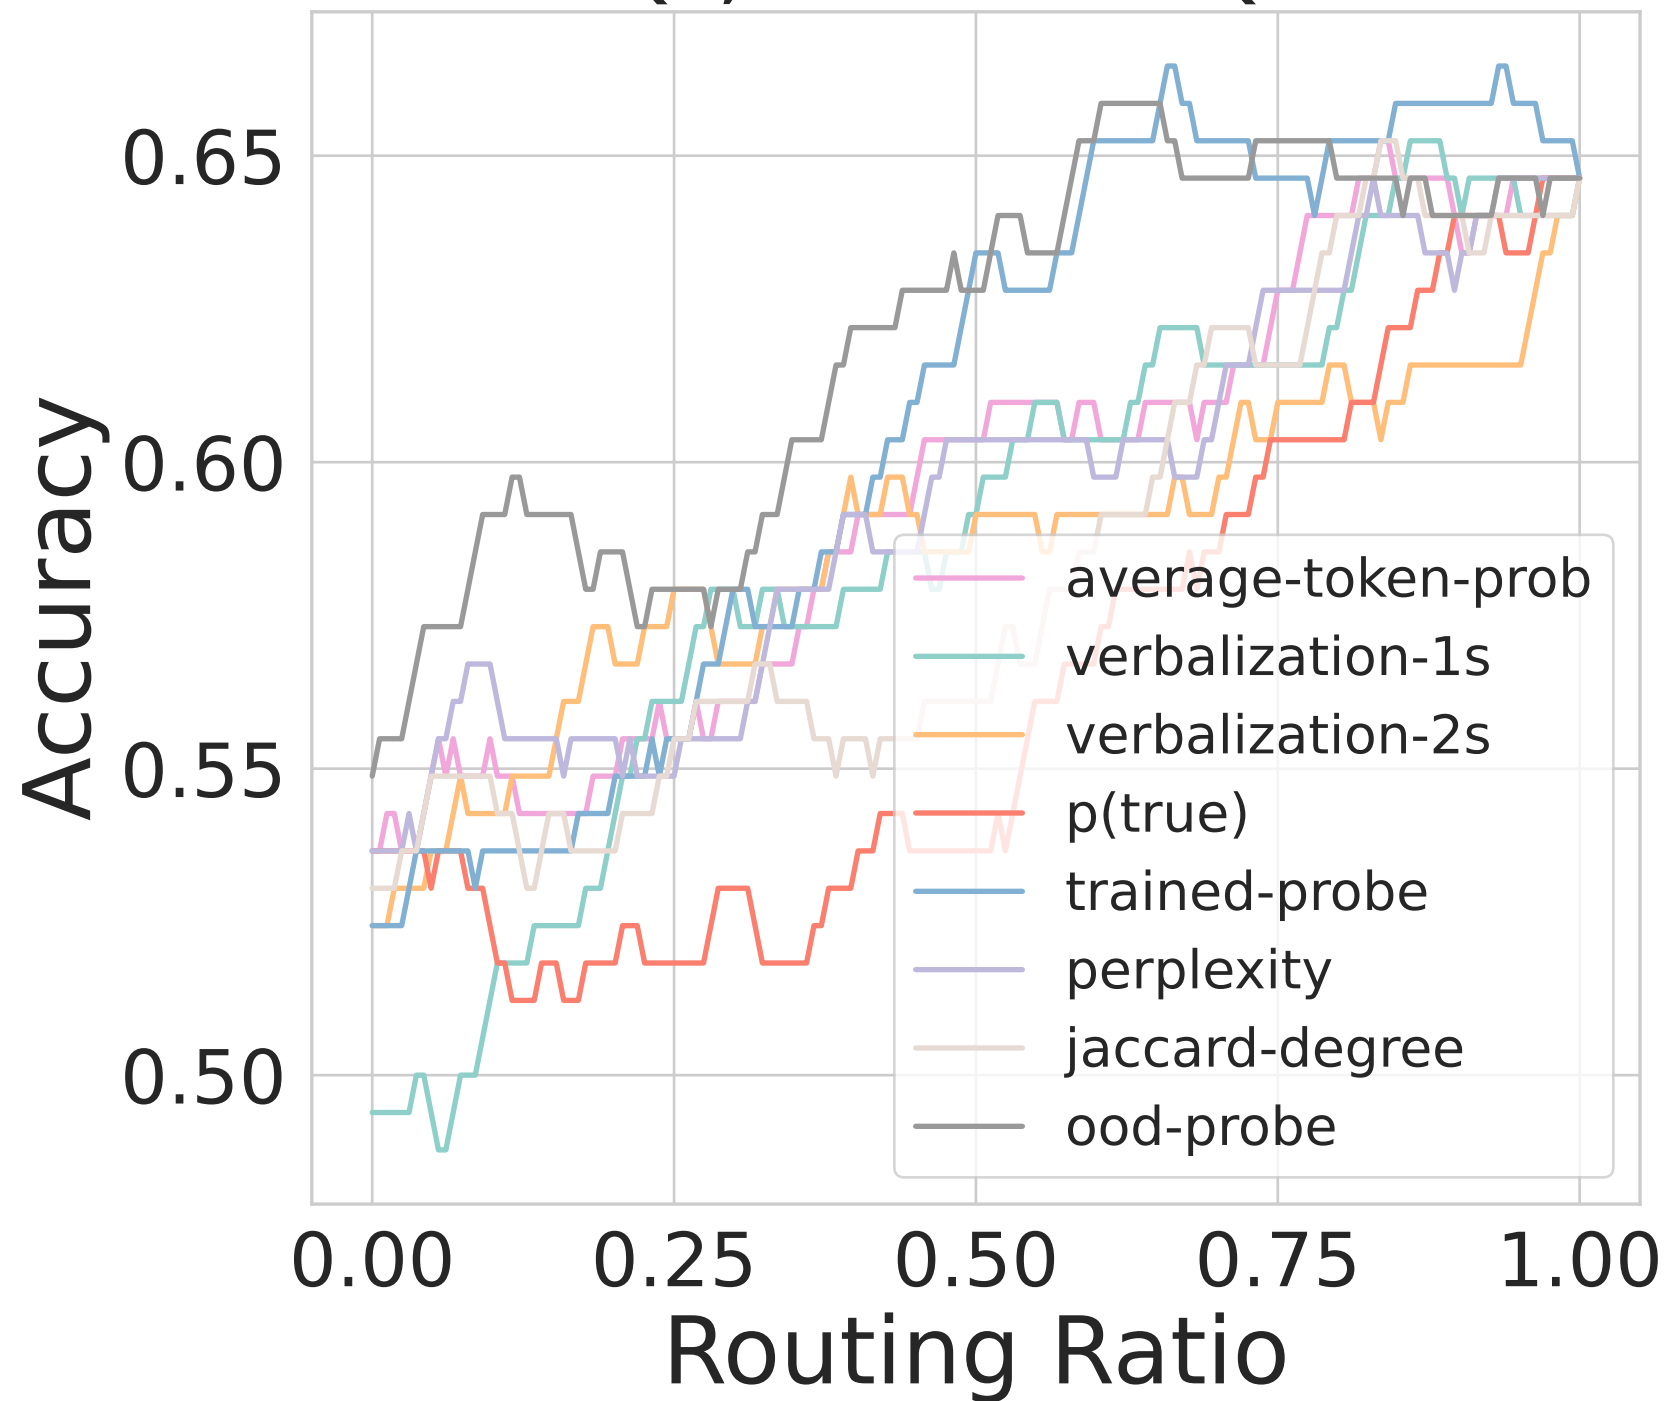

Supplement: supplementary_material [file rr_acc_truthful_qa_mistral-7b_qwen32.pdf › Routing_SLM_LLMs/Uncertainty-based Routing/w_legend/to_qwen32/rr_acc_truthful_qa_mistral-7b_qwen32.pdf]

# TruthfulQA, phi-3.5-mini to Qwen3-32B

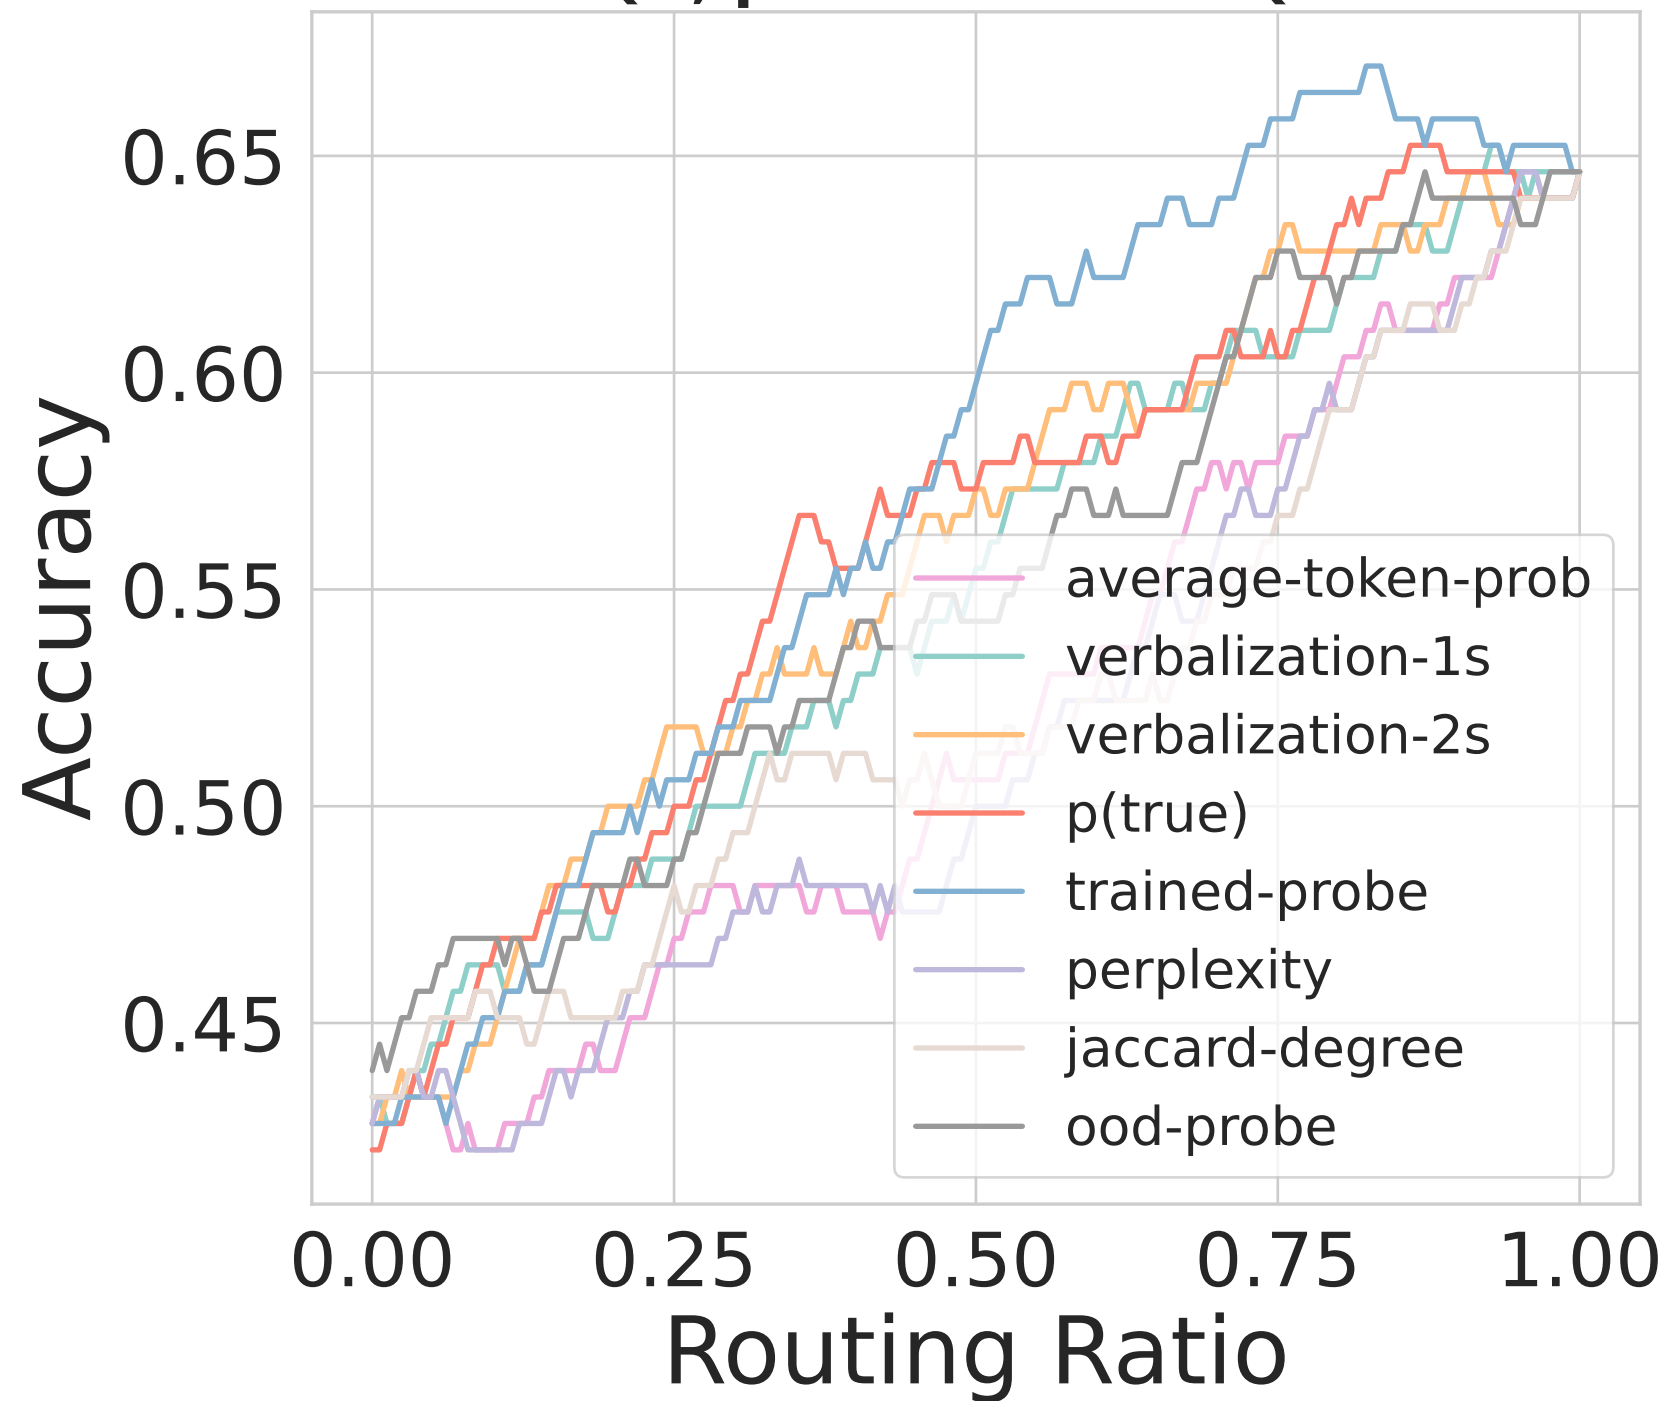

Supplement: supplementary_material [file rr_acc_truthful_qa_phi-3.5-mini_qwen32.pdf › Routing_SLM_LLMs/Uncertainty-based Routing/w_legend/to_qwen32/rr_acc_truthful_qa_phi-3.5-mini_qwen32.pdf]

# TruthfulQA, phi-4-mini-reasoning to Qwen3-32B

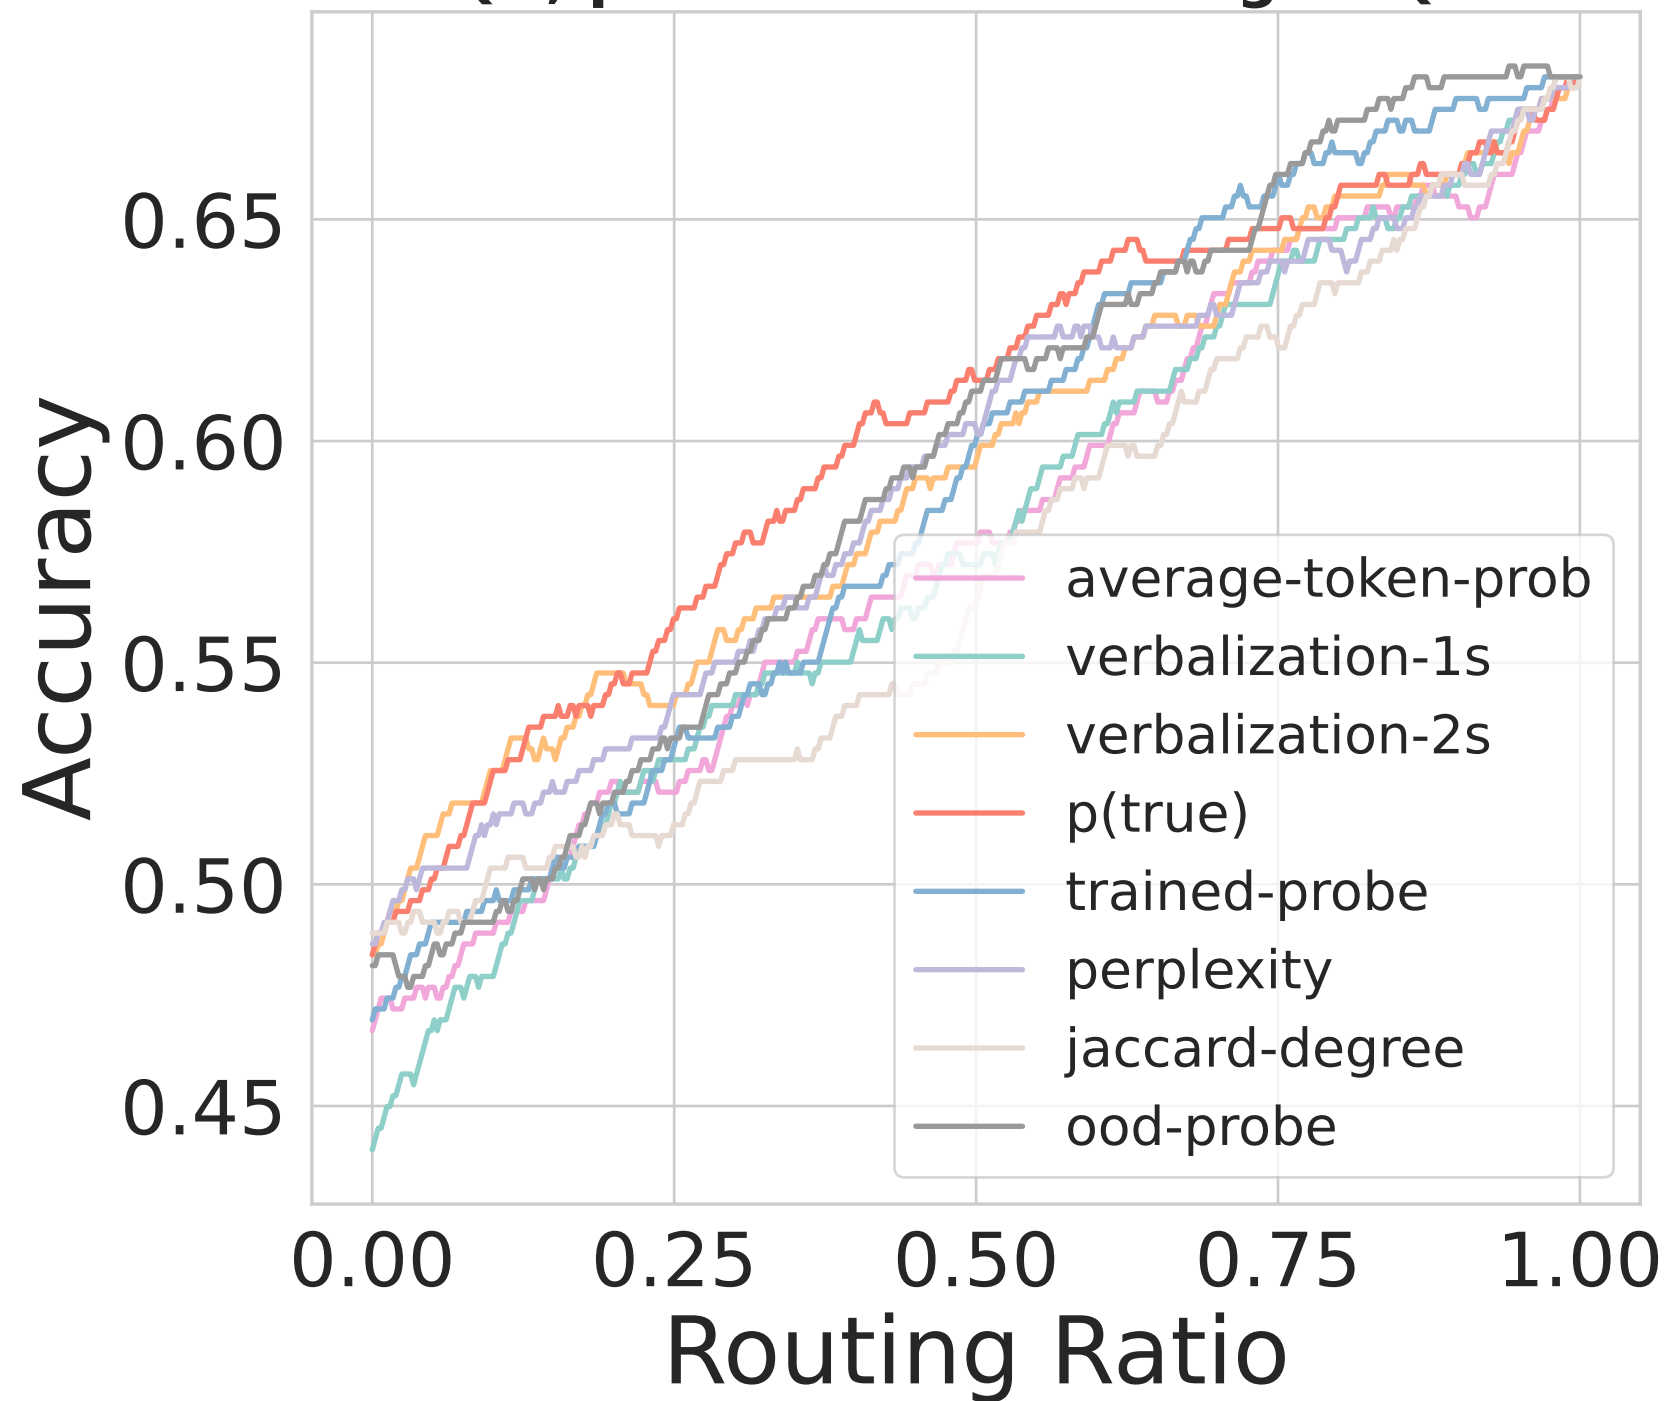

Supplement: supplementary_material [file rr_acc_truthful_qa_phi-4-mini-reasoning_qwen32.pdf › Routing_SLM_LLMs/Uncertainty-based Routing/w_legend/to_qwen32/rr_acc_truthful_qa_phi-4-mini-reasoning_qwen32.pdf]

TruthfulQA, qwen-2.5-7b to Qwen3-32B

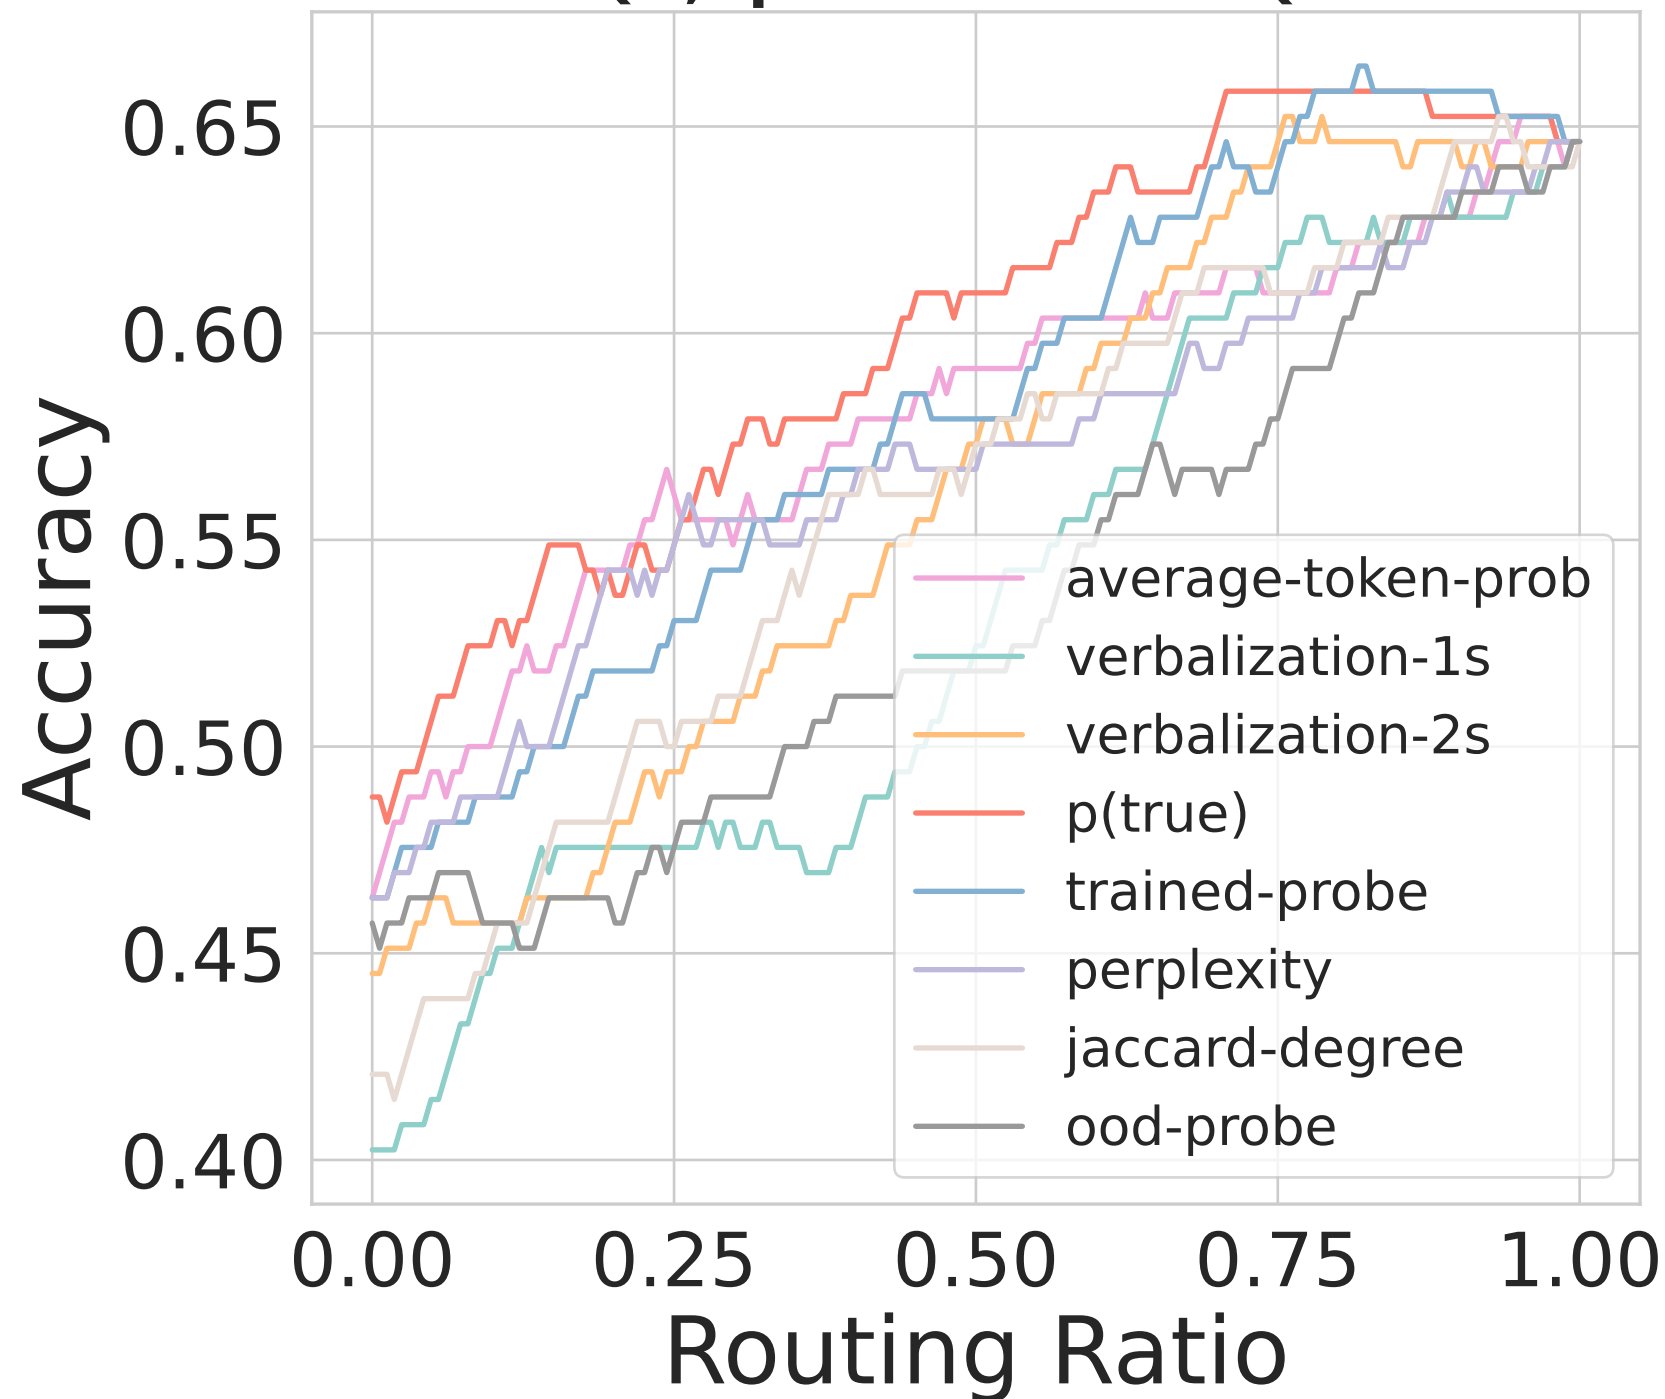

Supplement: supplementary_material [file rr_acc_truthful_qa_qwen-2.5-7b_qwen32.pdf › Routing_SLM_LLMs/Uncertainty-based Routing/w_legend/to_qwen32/rr_acc_truthful_qa_qwen-2.5-7b_qwen32.pdf]

# WinoGrande, Qwen3-0.6B to Qwen3-32B

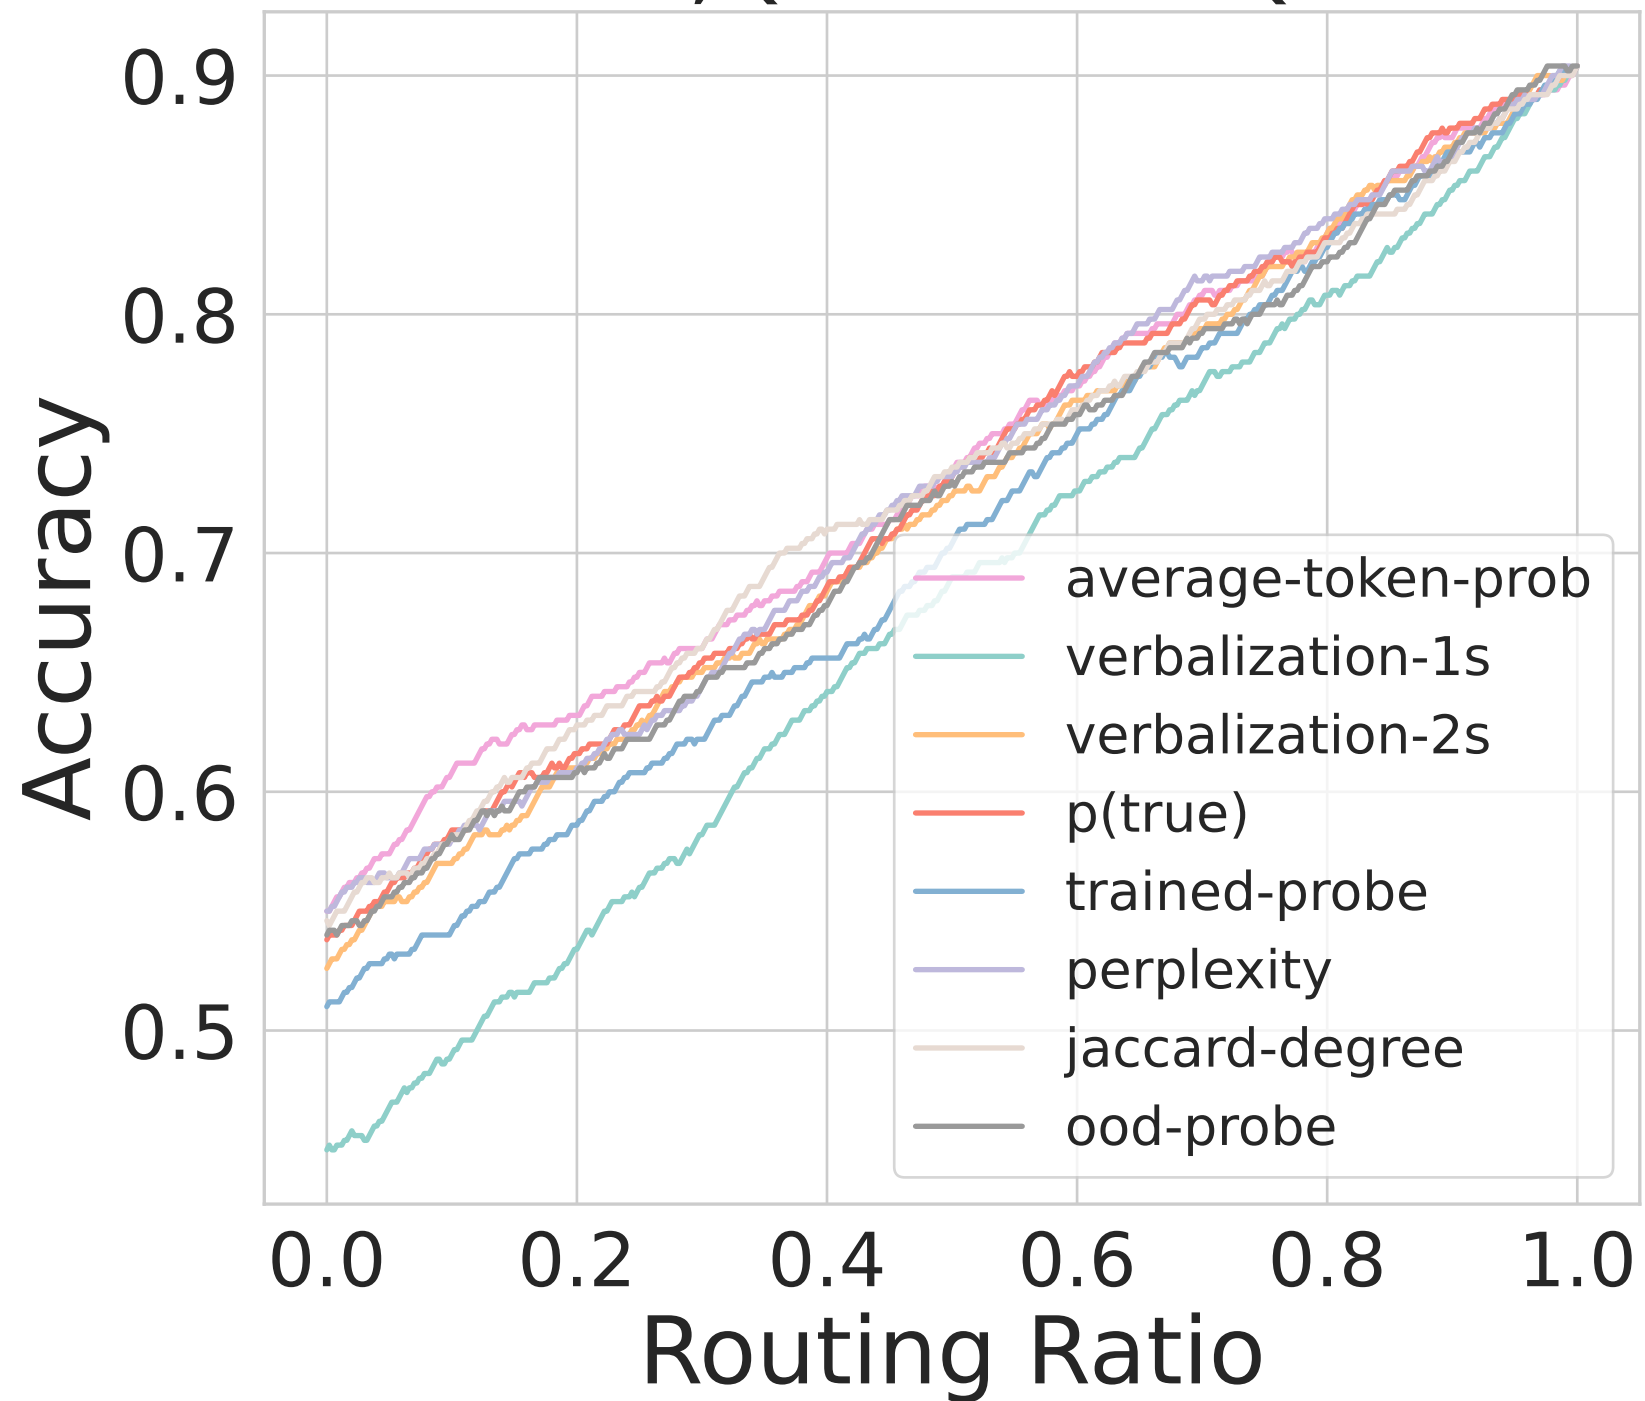

Supplement: supplementary_material [file rr_acc_winogrande_Qwen3-0.6B_qwen32.pdf › Routing_SLM_LLMs/Uncertainty-based Routing/w_legend/to_qwen32/rr_acc_winogrande_Qwen3-0.6B_qwen32.pdf]

# WinoGrande, Qwen3-1.7B to Qwen3-32B

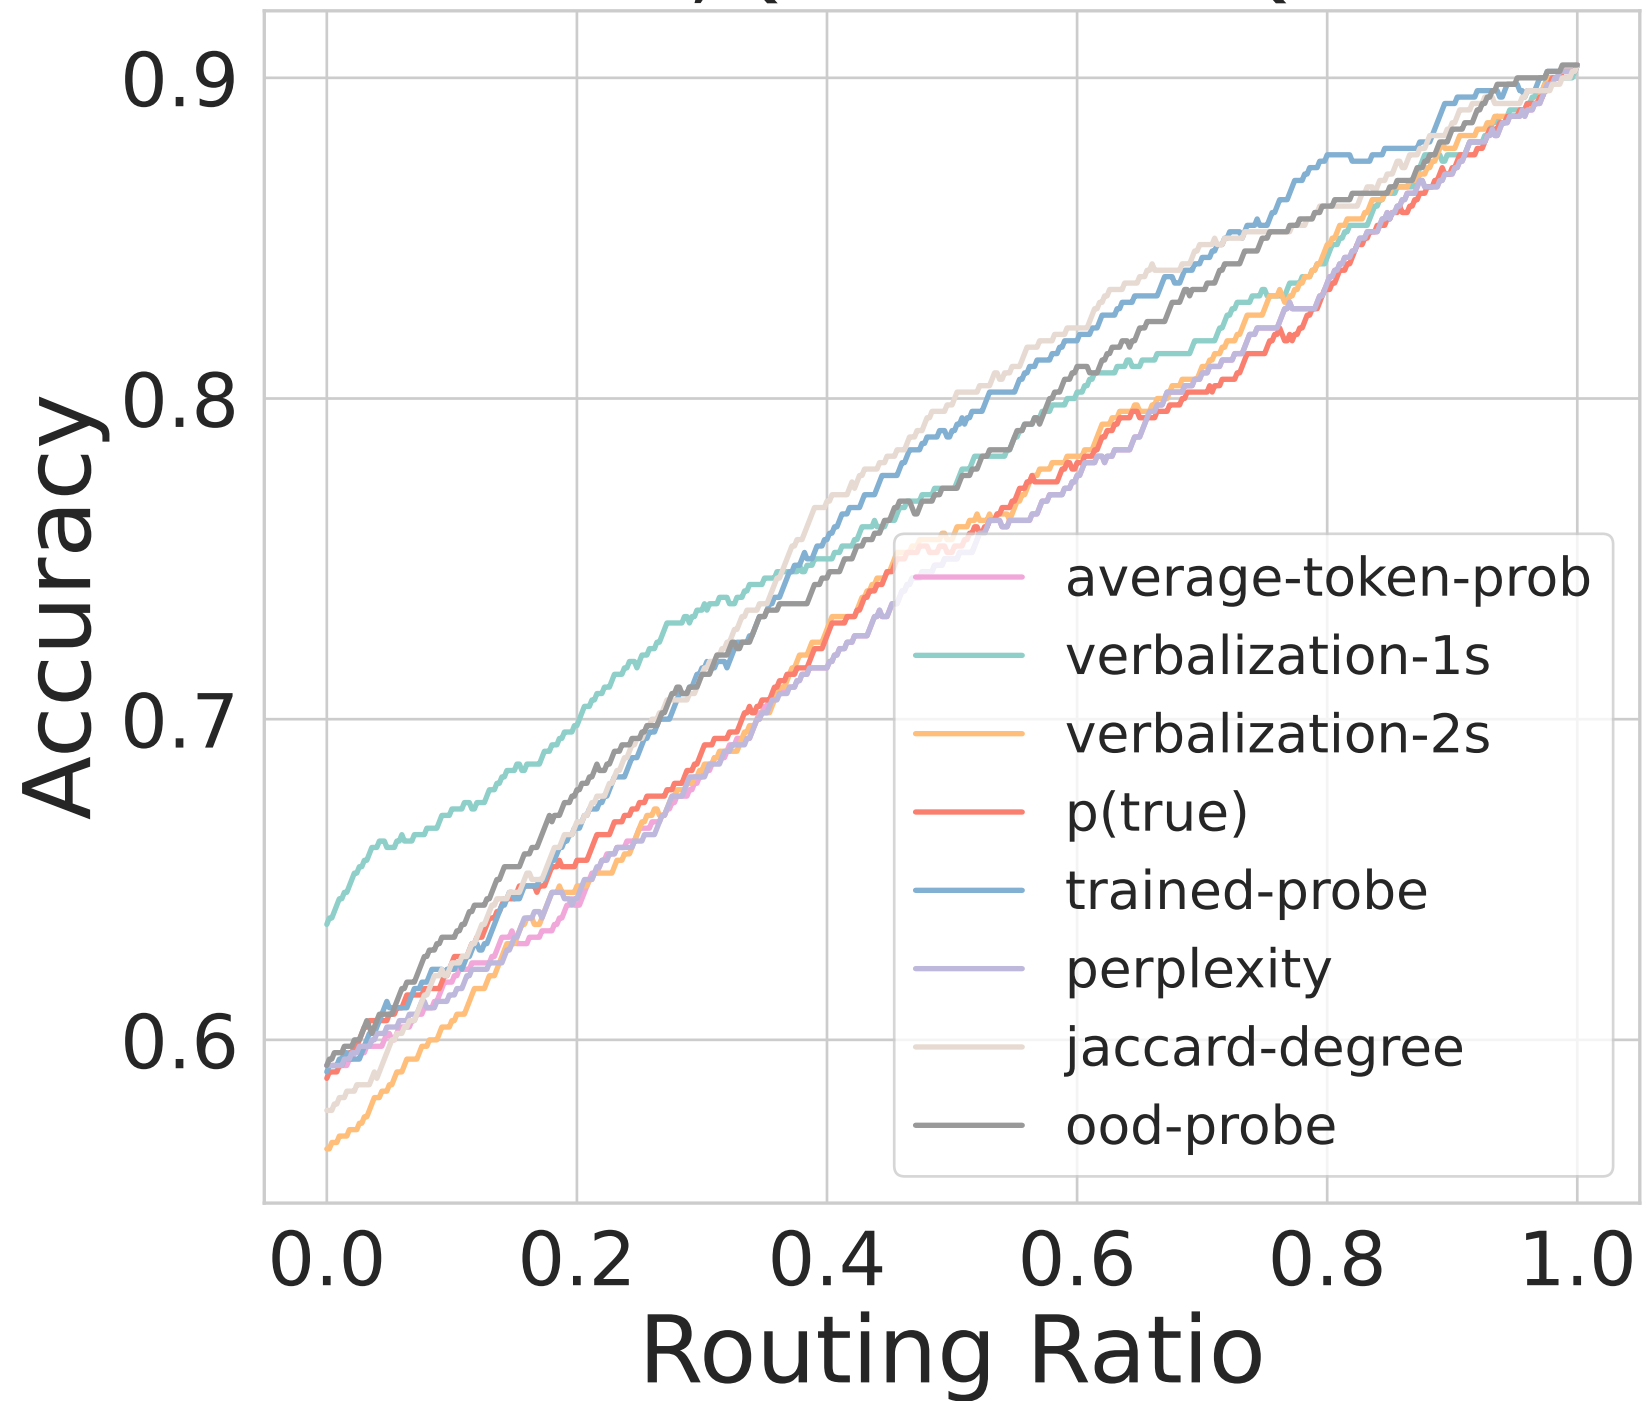

Supplement: supplementary_material [file rr_acc_winogrande_Qwen3-1.7B_qwen32.pdf › Routing_SLM_LLMs/Uncertainty-based Routing/w_legend/to_qwen32/rr_acc_winogrande_Qwen3-1.7B_qwen32.pdf]

# WinoGrande, Qwen3-4B to Qwen3-32B

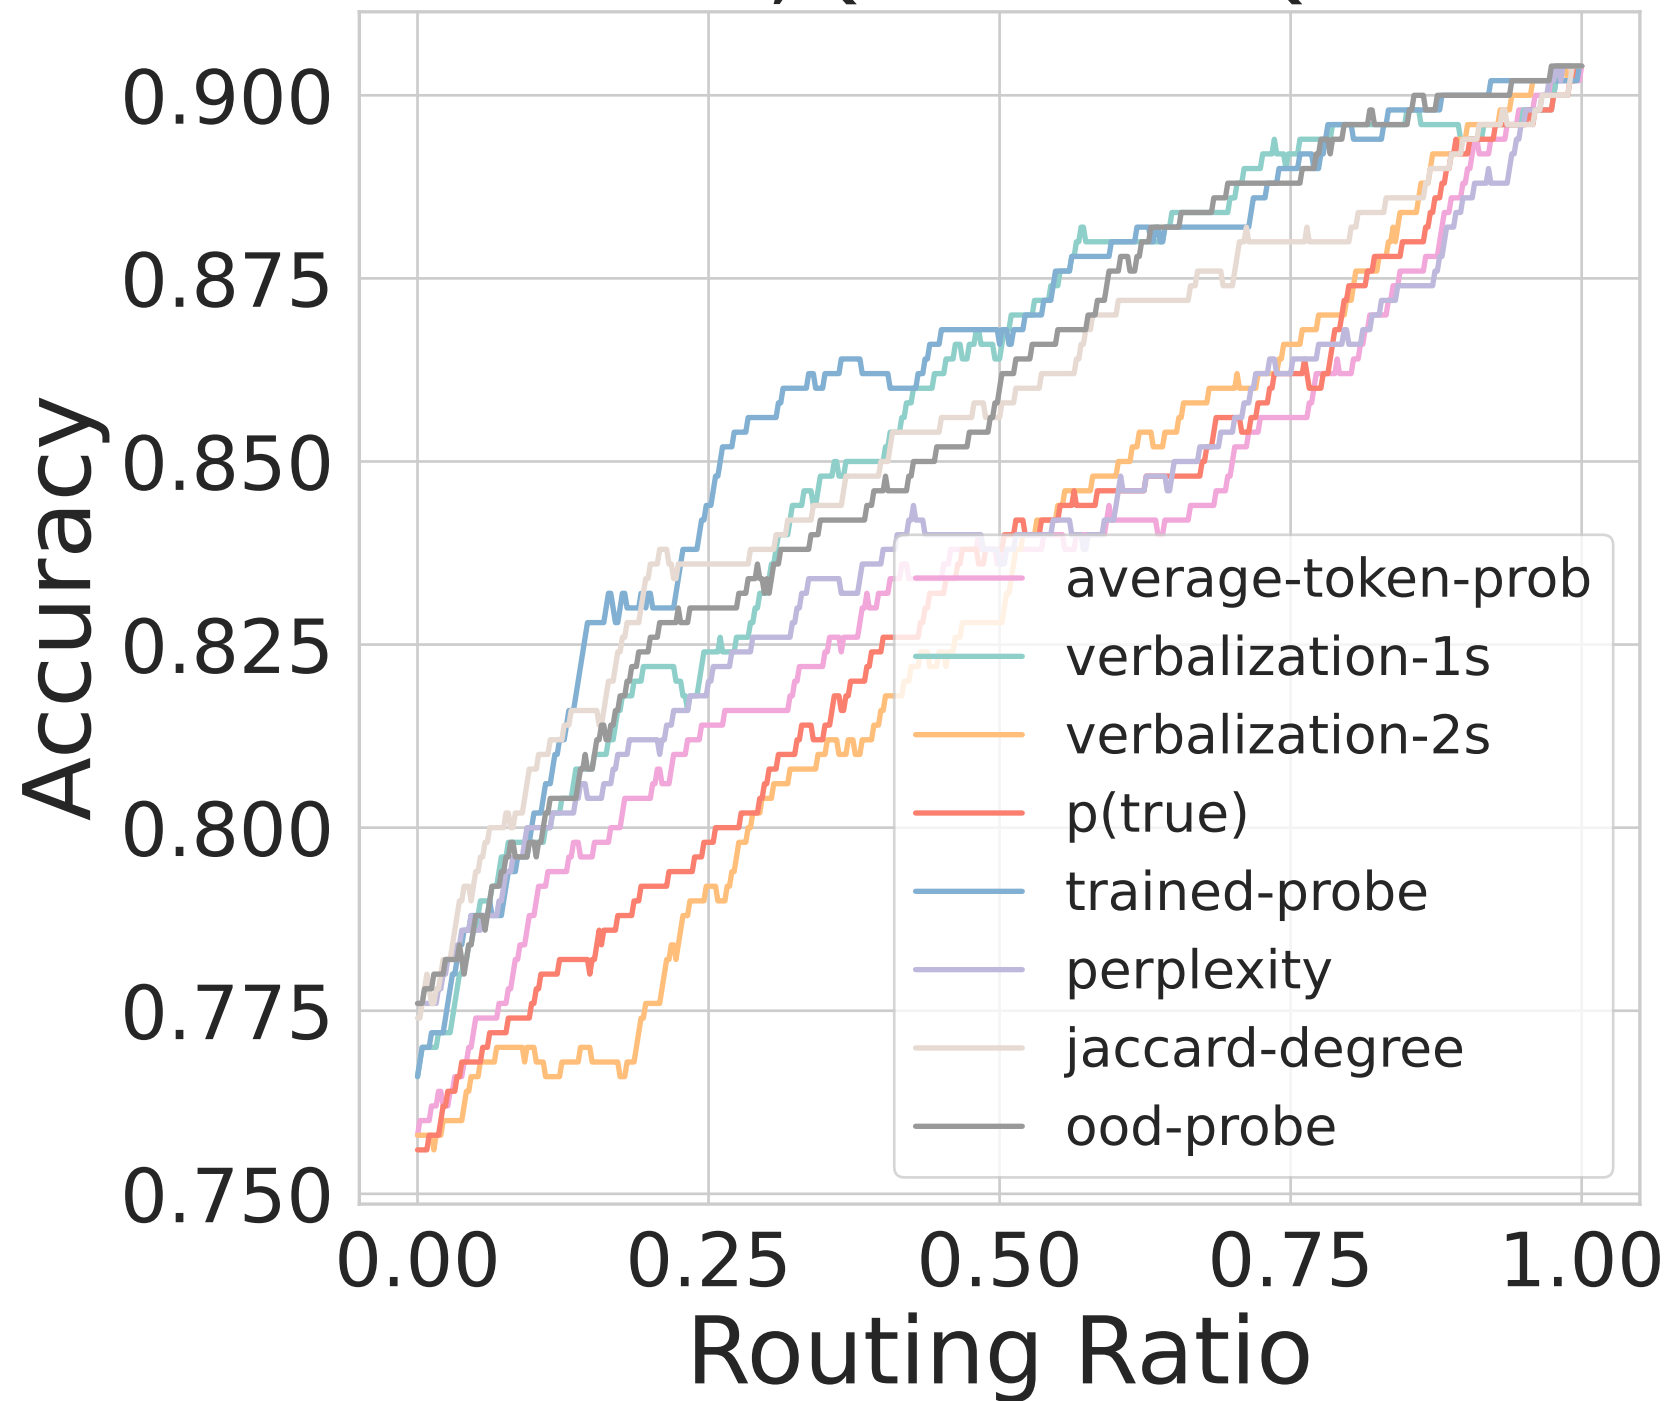

Supplement: supplementary_material [file rr_acc_winogrande_Qwen3-4B_qwen32.pdf › Routing_SLM_LLMs/Uncertainty-based Routing/w_legend/to_qwen32/rr_acc_winogrande_Qwen3-4B_qwen32.pdf]

# WinoGrande, granite-3.1-8b to Qwen3-32B

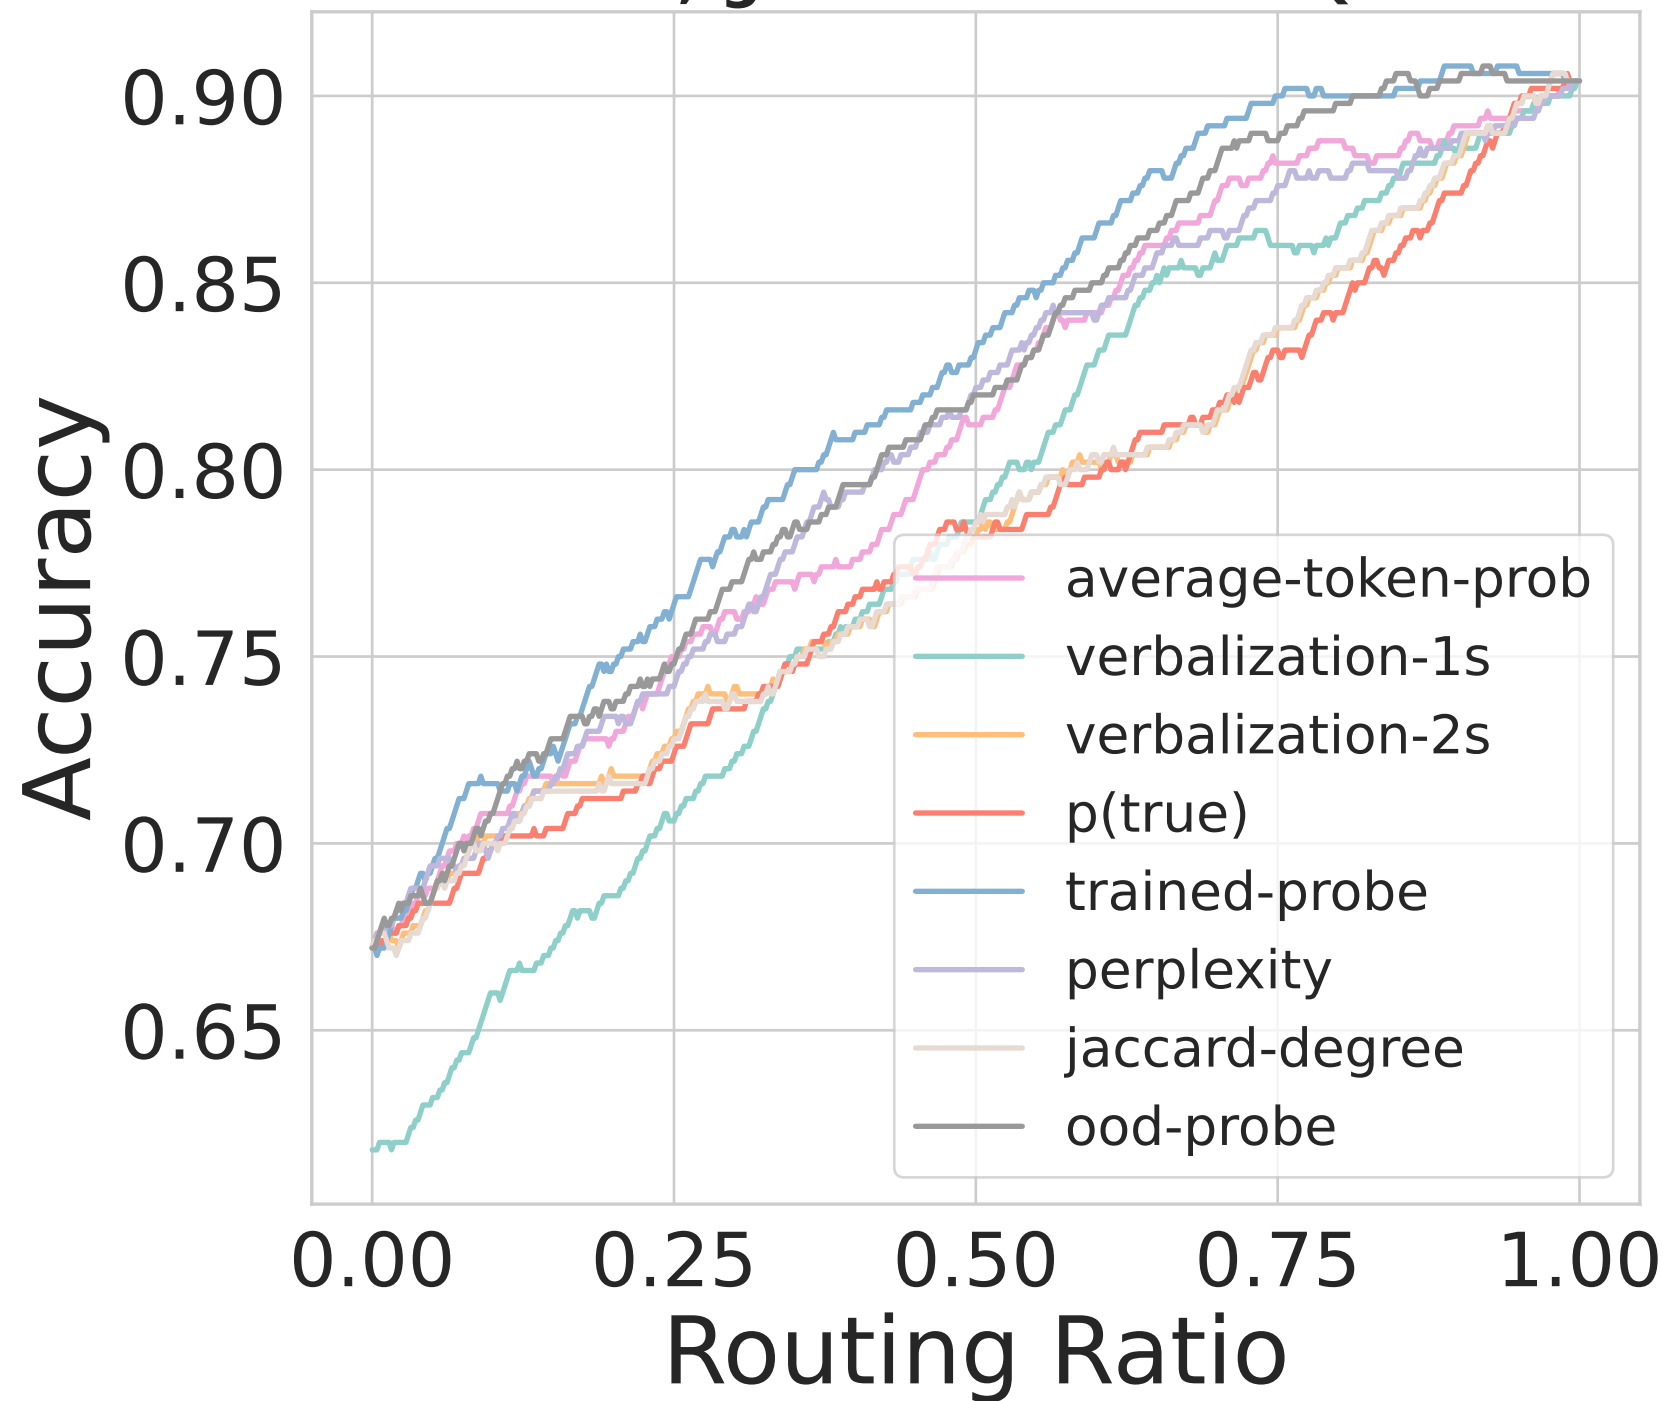

Supplement: supplementary_material [file rr_acc_winogrande_granite-3.1-8b_qwen32.pdf › Routing_SLM_LLMs/Uncertainty-based Routing/w_legend/to_qwen32/rr_acc_winogrande_granite-3.1-8b_qwen32.pdf]

# WinoGrande, llama-3.1-8b to Qwen3-32B

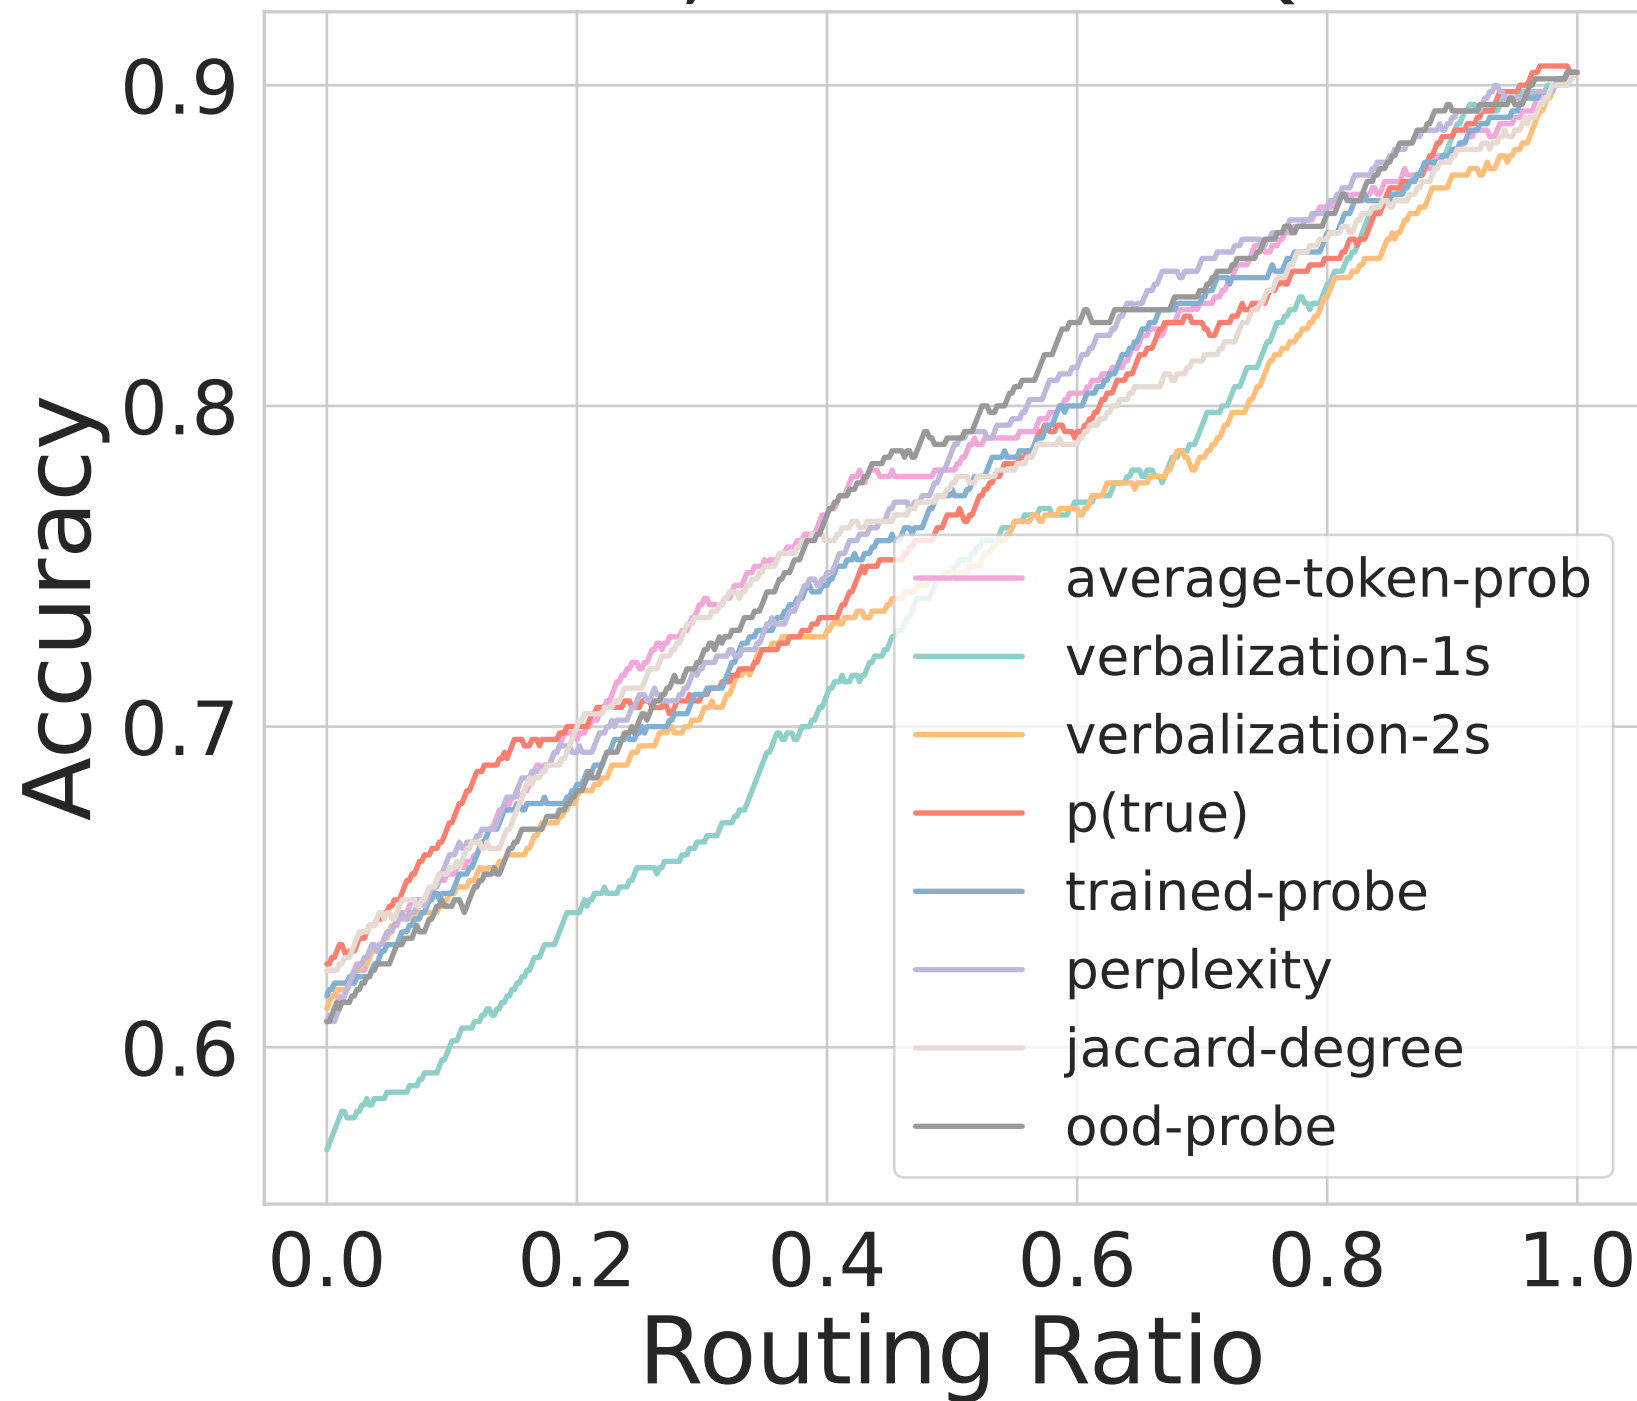

Supplement: supplementary_material [file rr_acc_winogrande_llama-3.1-8b_qwen32.pdf › Routing_SLM_LLMs/Uncertainty-based Routing/w_legend/to_qwen32/rr_acc_winogrande_llama-3.1-8b_qwen32.pdf]

# WinoGrande, llama-3.2-1b to Qwen3-32B

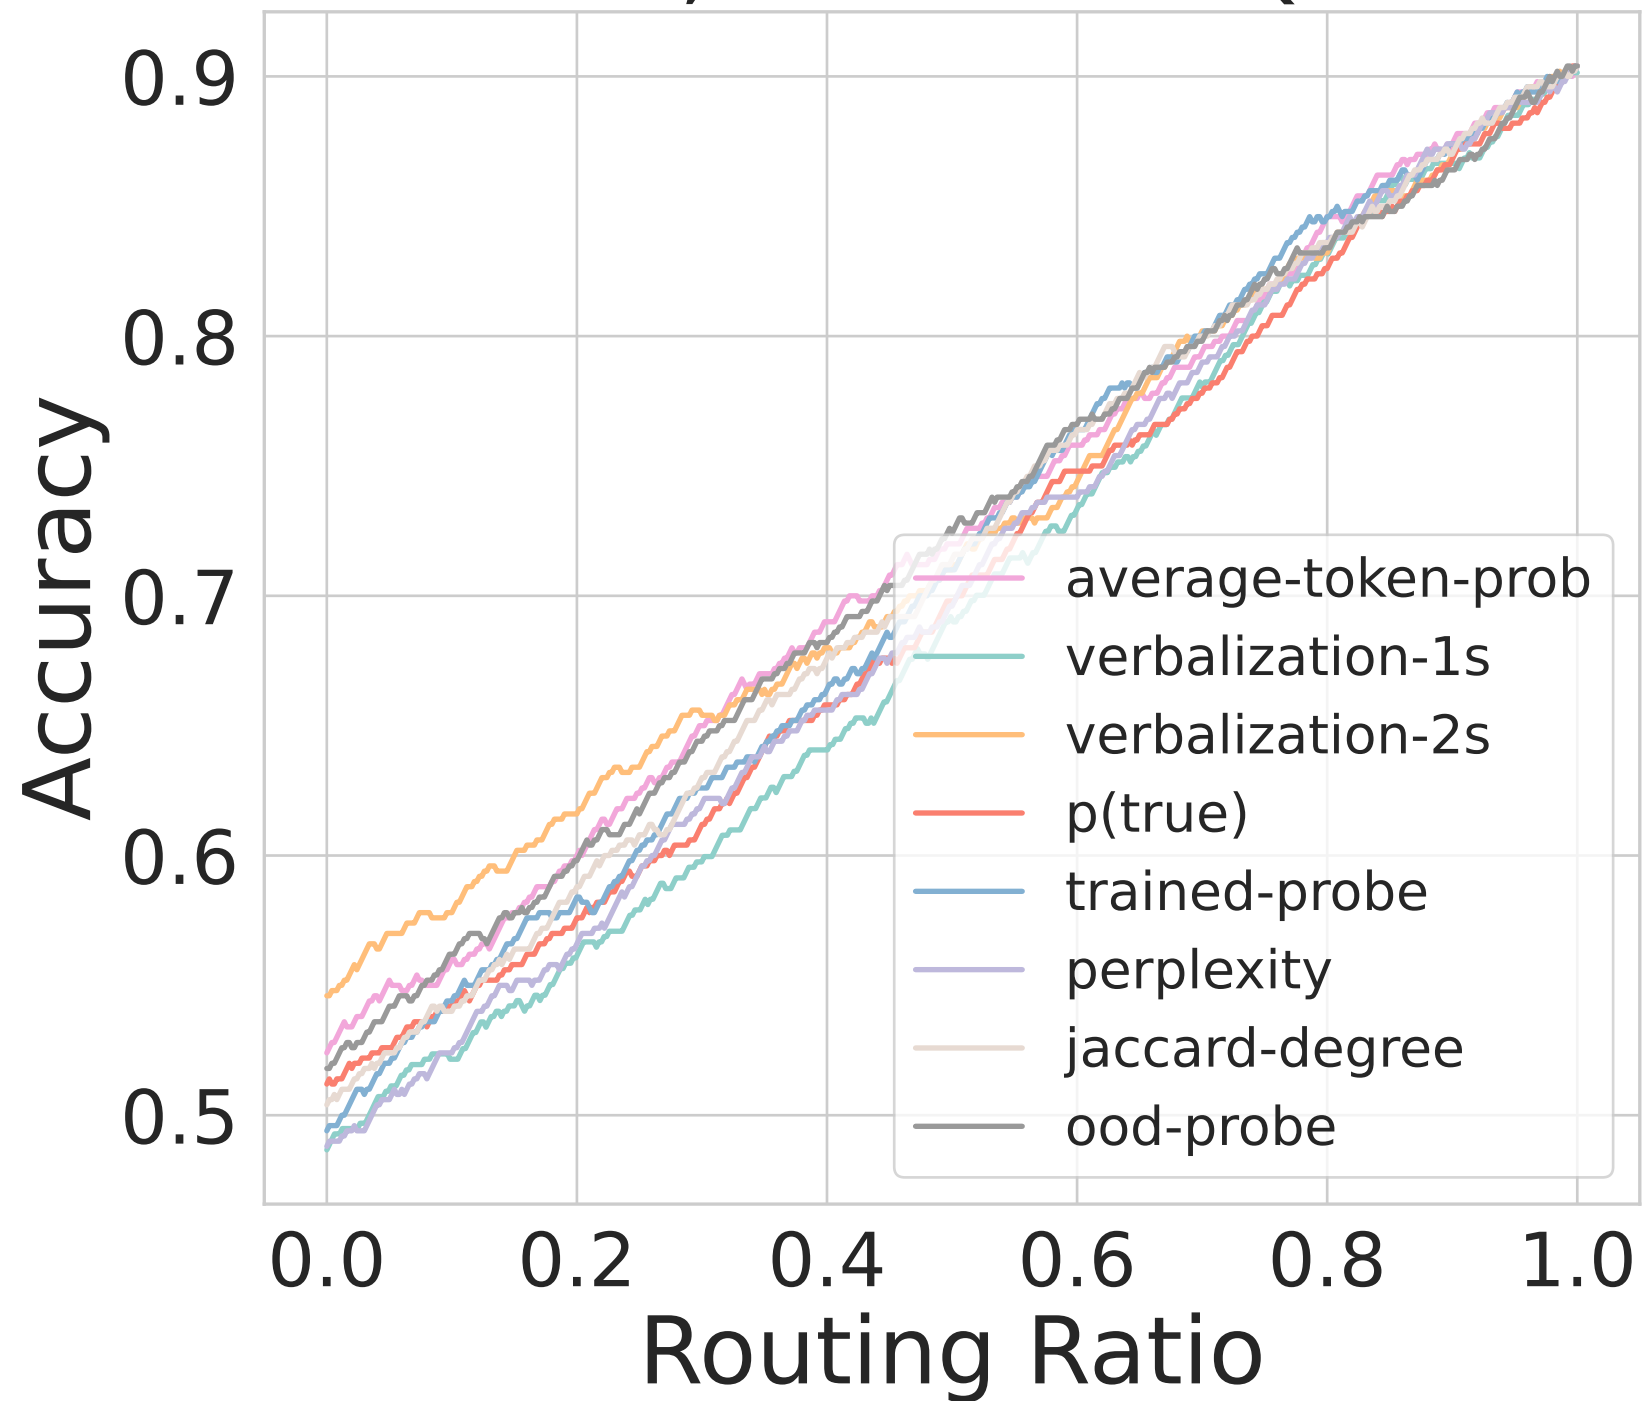

Supplement: supplementary_material [file rr_acc_winogrande_llama-3.2-1b_qwen32.pdf › Routing_SLM_LLMs/Uncertainty-based Routing/w_legend/to_qwen32/rr_acc_winogrande_llama-3.2-1b_qwen32.pdf]

# WinoGrande, llama-3.2-3b to Qwen3-32B

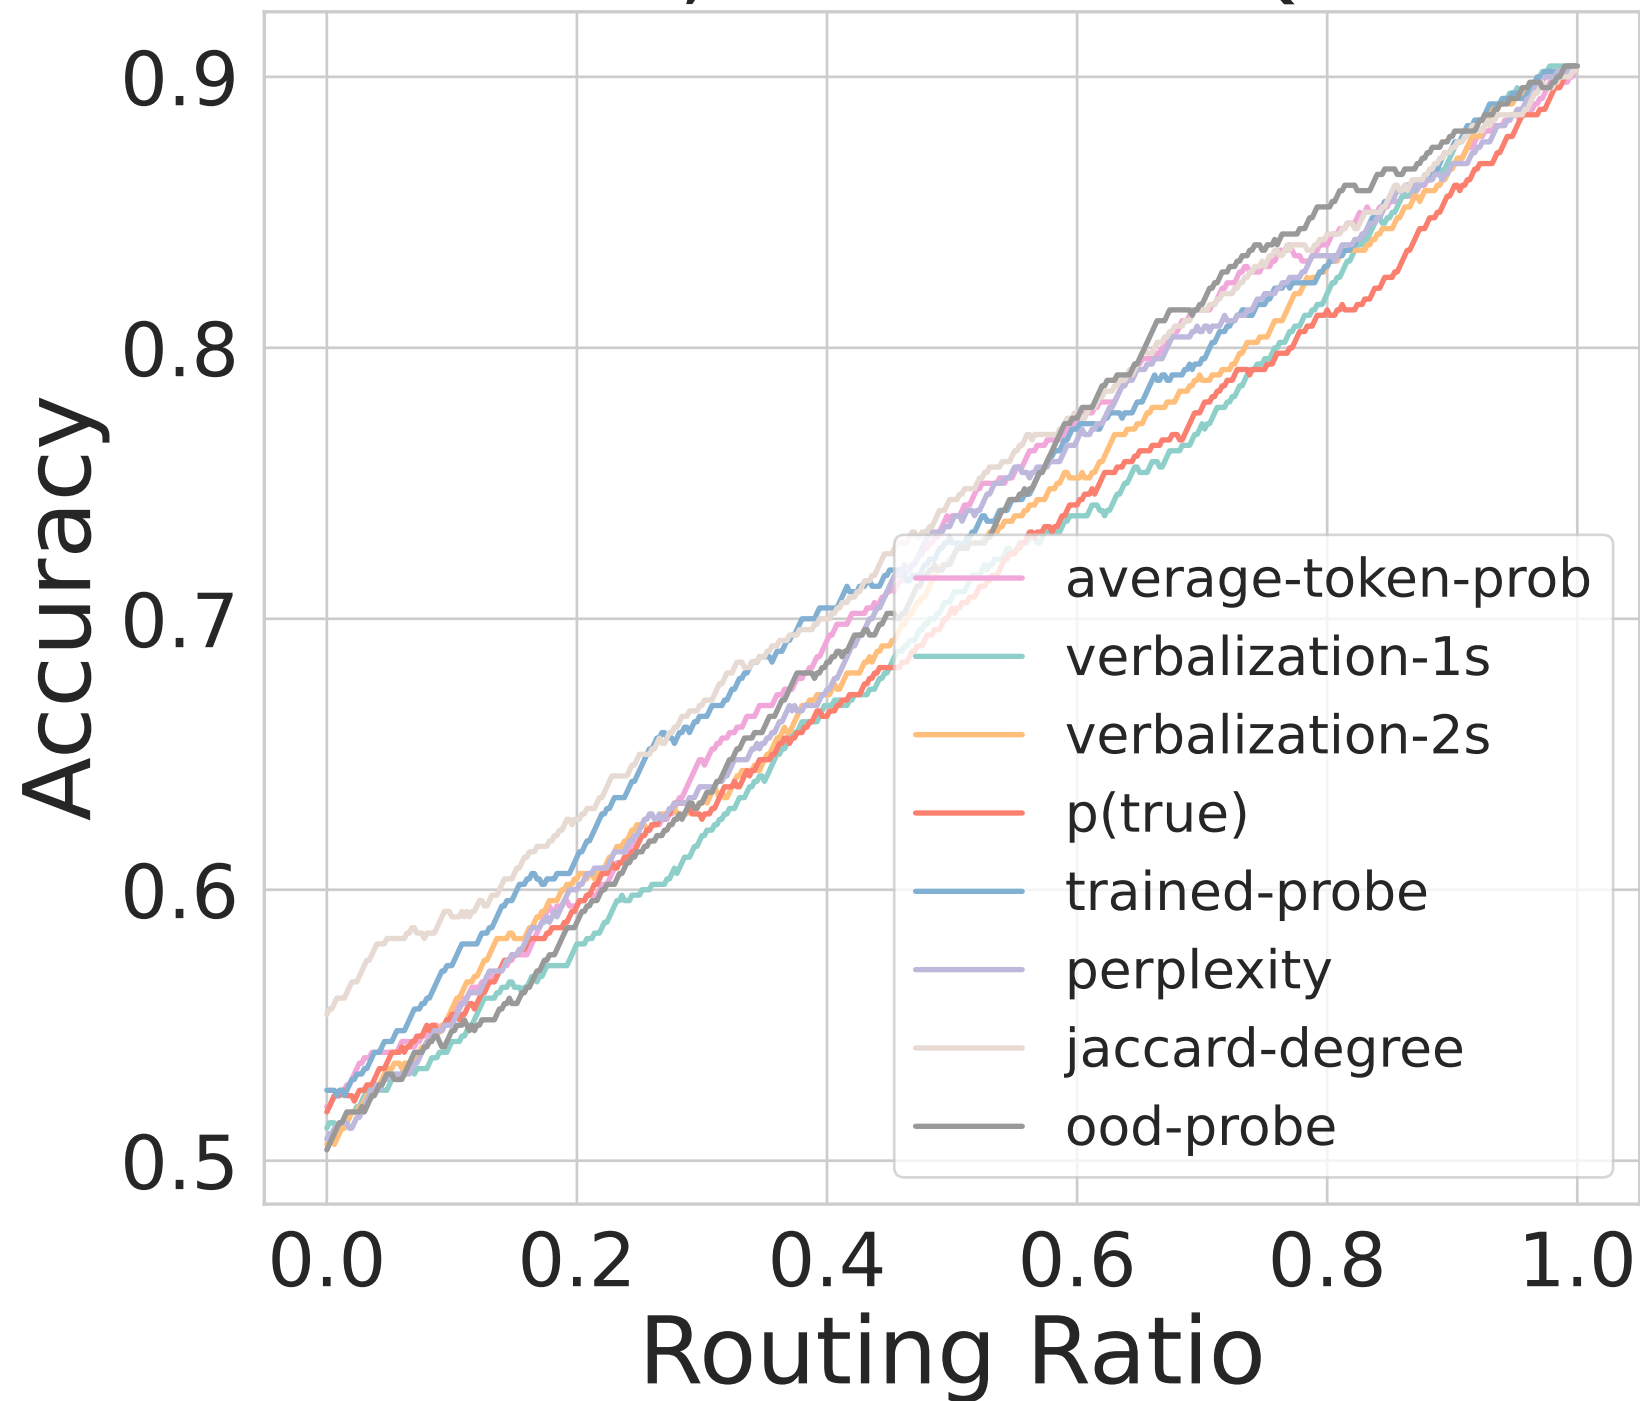

Supplement: supplementary_material [file rr_acc_winogrande_llama-3.2-3b_qwen32.pdf › Routing_SLM_LLMs/Uncertainty-based Routing/w_legend/to_qwen32/rr_acc_winogrande_llama-3.2-3b_qwen32.pdf]

WinoGrande, mistral-7b to Qwen3-32B

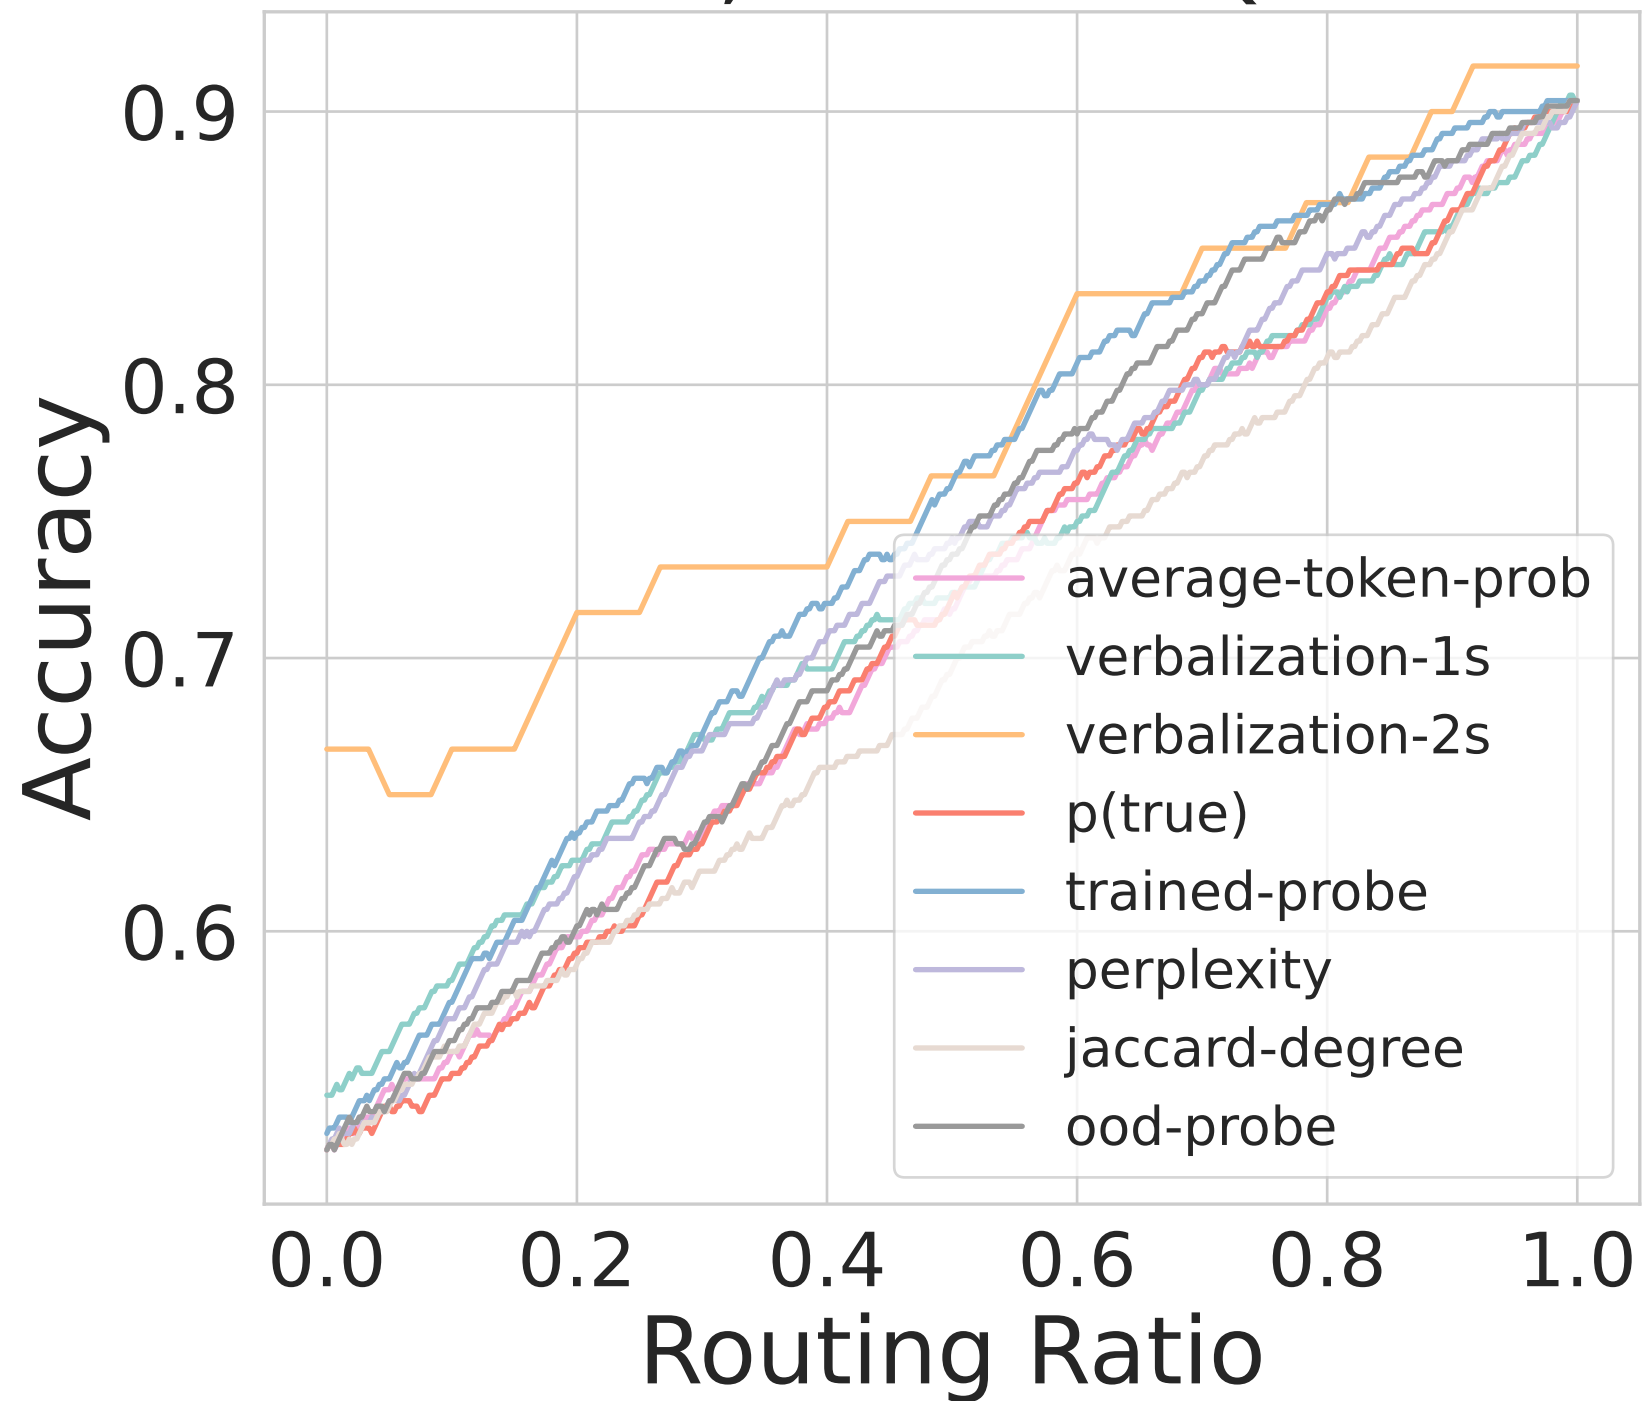

Supplement: supplementary_material [file rr_acc_winogrande_mistral-7b_qwen32.pdf › Routing_SLM_LLMs/Uncertainty-based Routing/w_legend/to_qwen32/rr_acc_winogrande_mistral-7b_qwen32.pdf]

# WinoGrande, phi-3.5-mini to Qwen3-32B

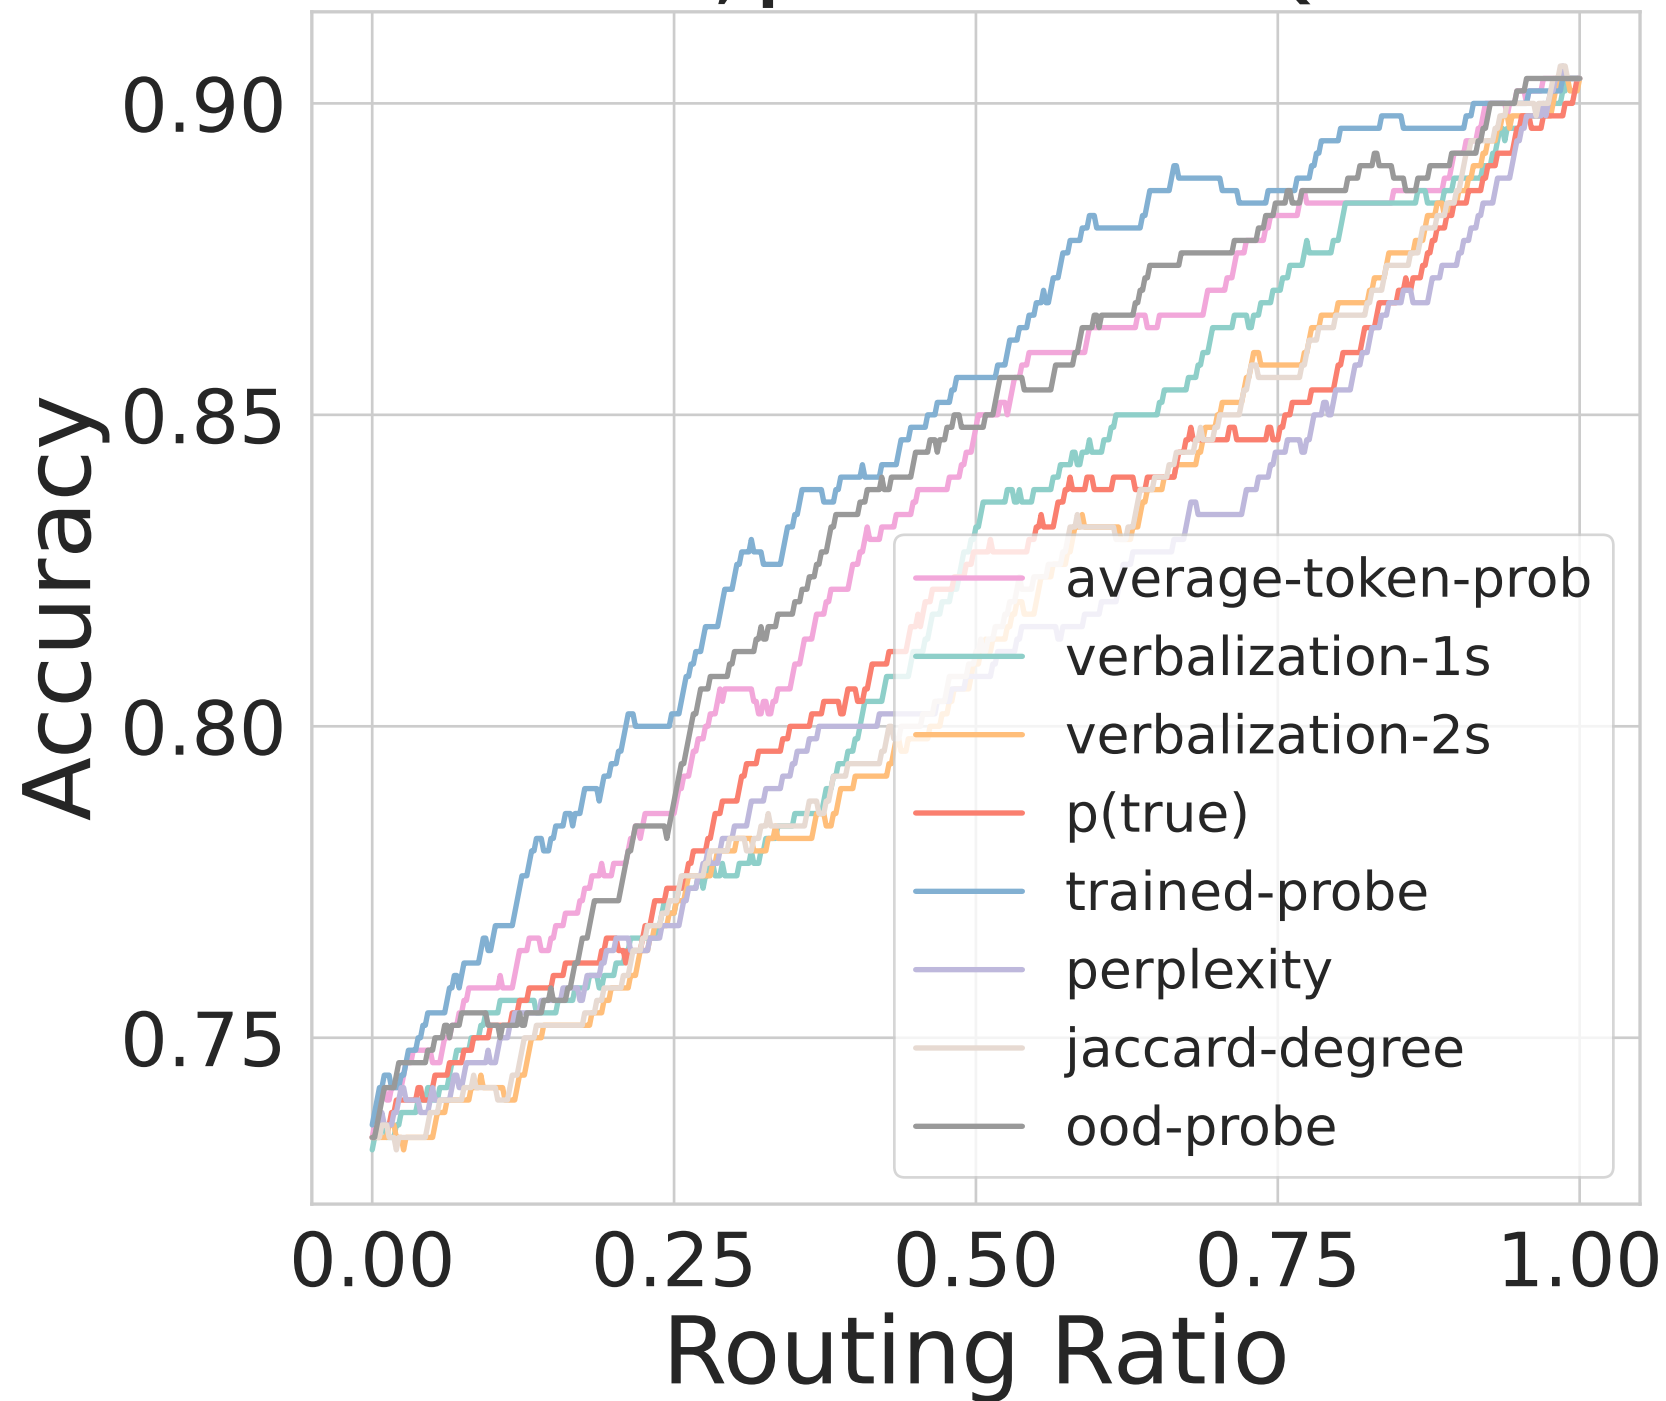

Supplement: supplementary_material [file rr_acc_winogrande_phi-3.5-mini_qwen32.pdf › Routing_SLM_LLMs/Uncertainty-based Routing/w_legend/to_qwen32/rr_acc_winogrande_phi-3.5-mini_qwen32.pdf]

# WinoGrande, phi-4-mini-reasoning to Qwen3-32B

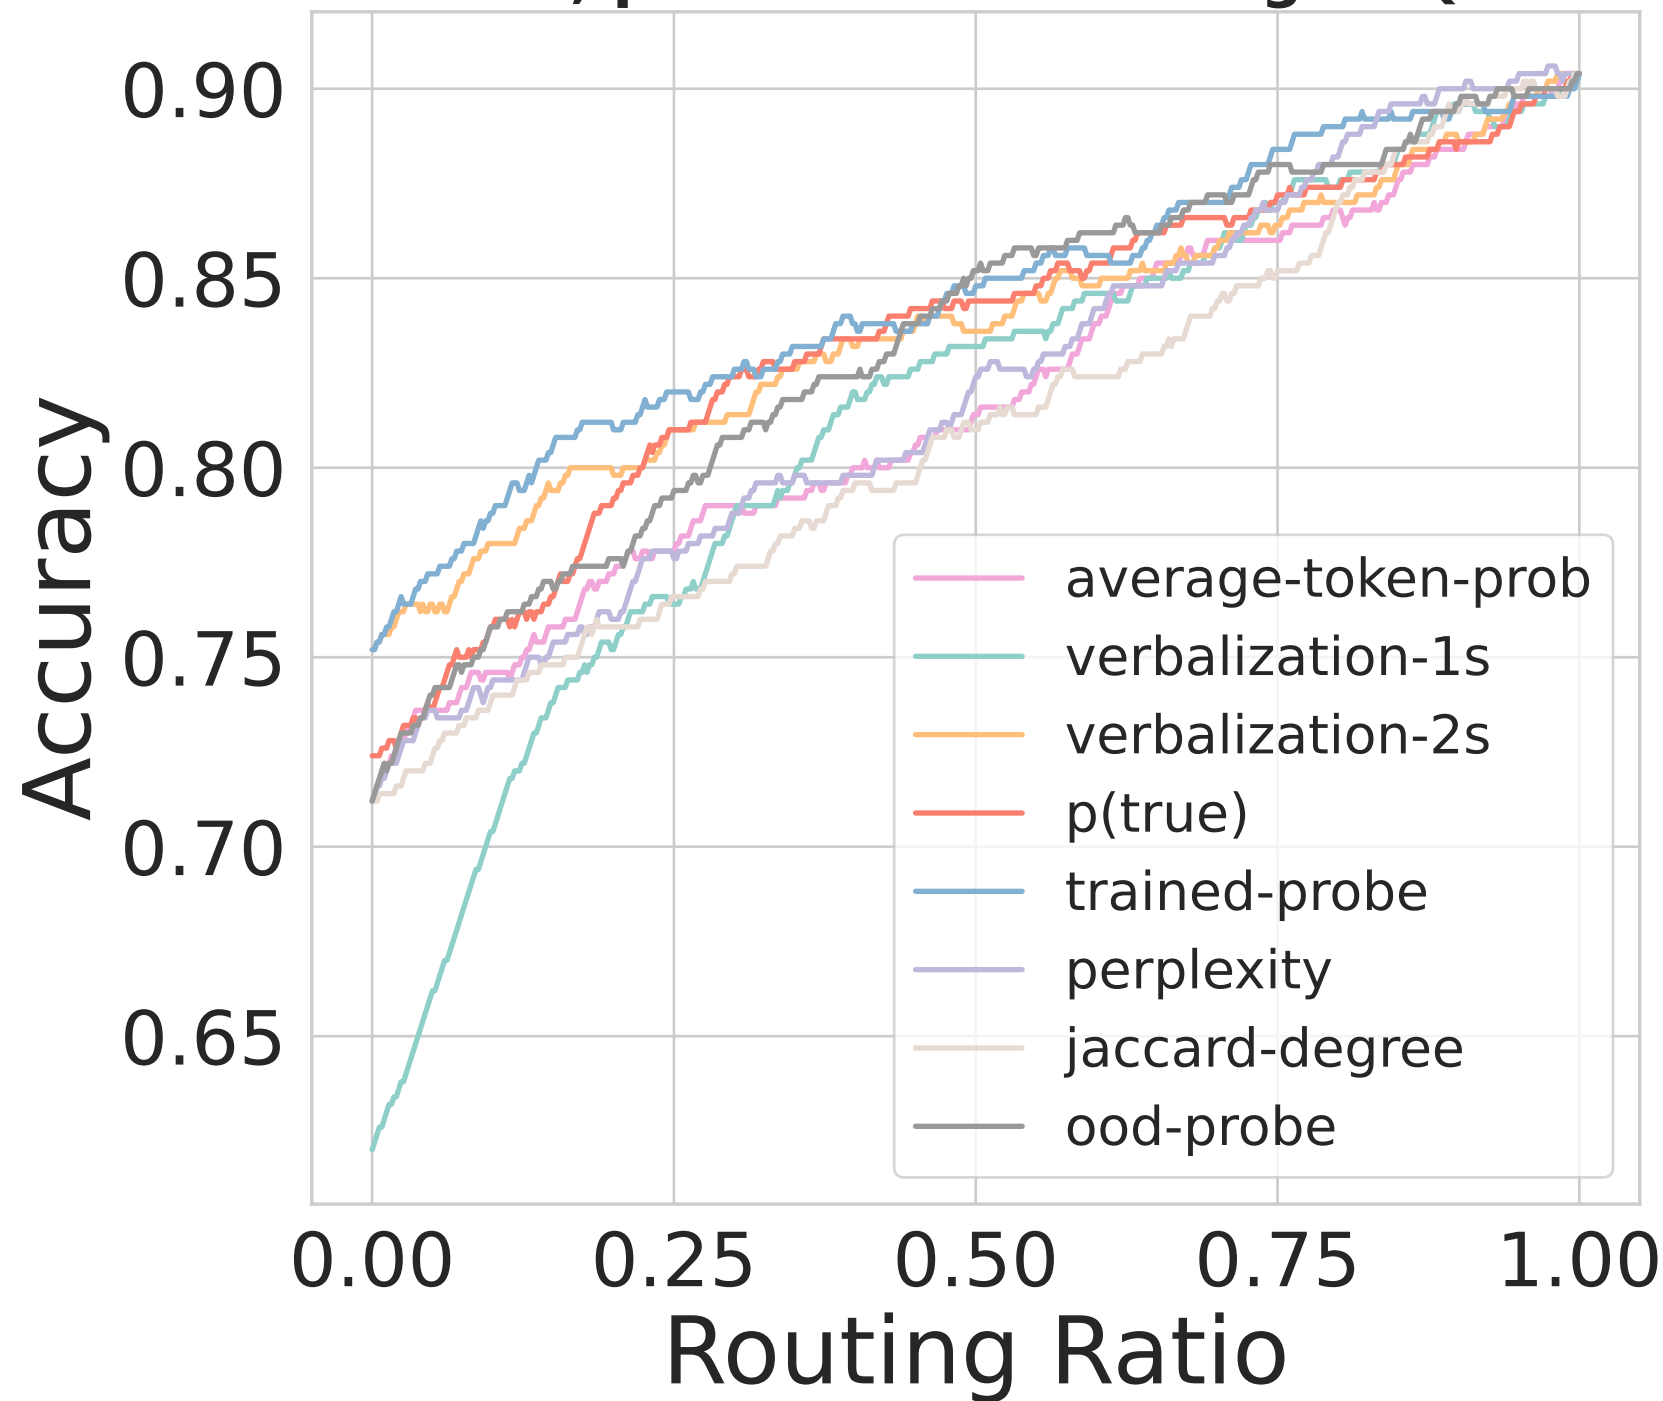

Supplement: supplementary_material [file rr_acc_winogrande_phi-4-mini-reasoning_qwen32.pdf › Routing_SLM_LLMs/Uncertainty-based Routing/w_legend/to_qwen32/rr_acc_winogrande_phi-4-mini-reasoning_qwen32.pdf]

# WinoGrande, qwen-2.5-7b to Qwen3-32B

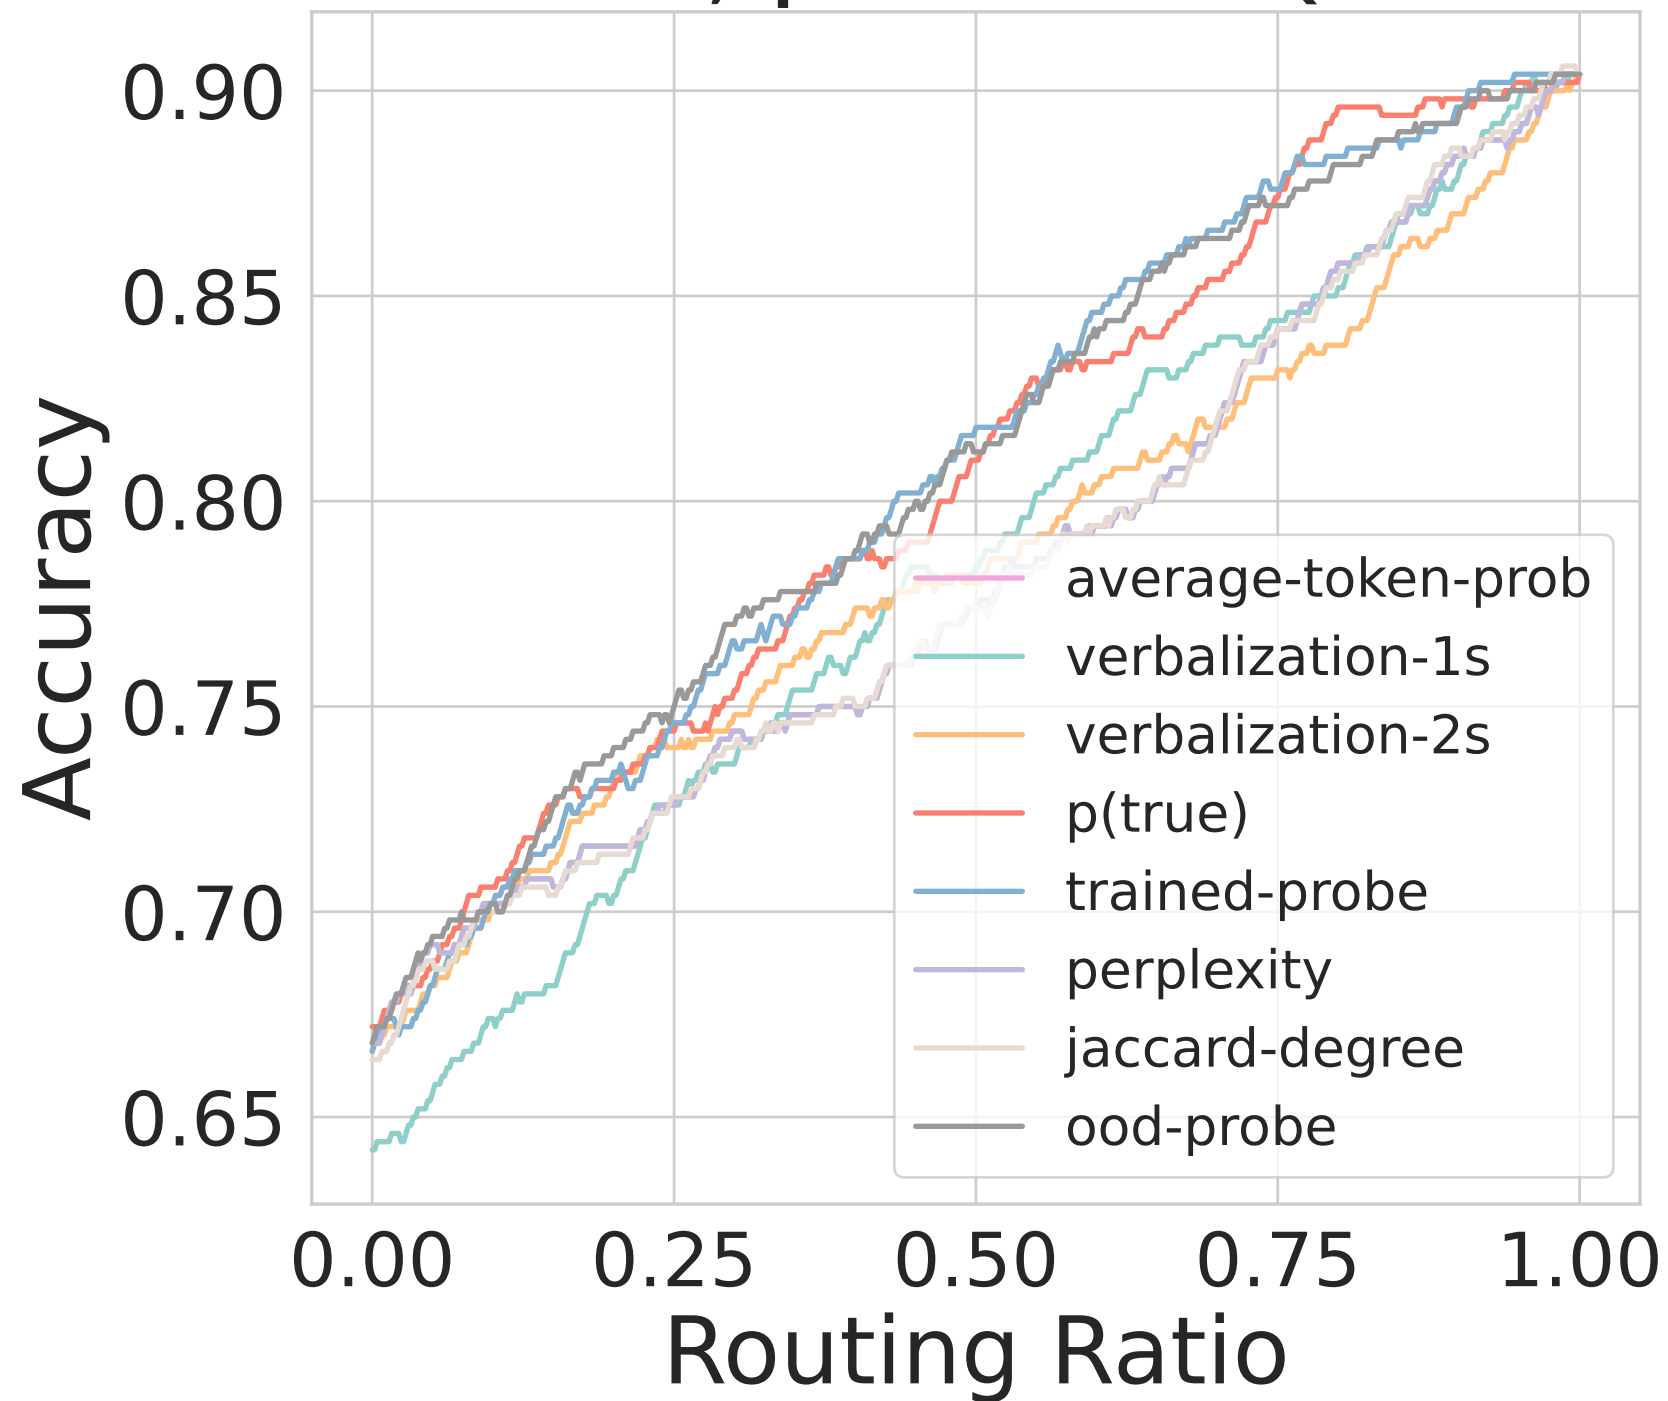

Supplement: supplementary_material [file rr_acc_winogrande_qwen-2.5-7b_qwen32.pdf › Routing_SLM_LLMs/Uncertainty-based Routing/w_legend/to_qwen32/rr_acc_winogrande_qwen-2.5-7b_qwen32.pdf]

# WinoGrande, rwkv to Qwen3-32B

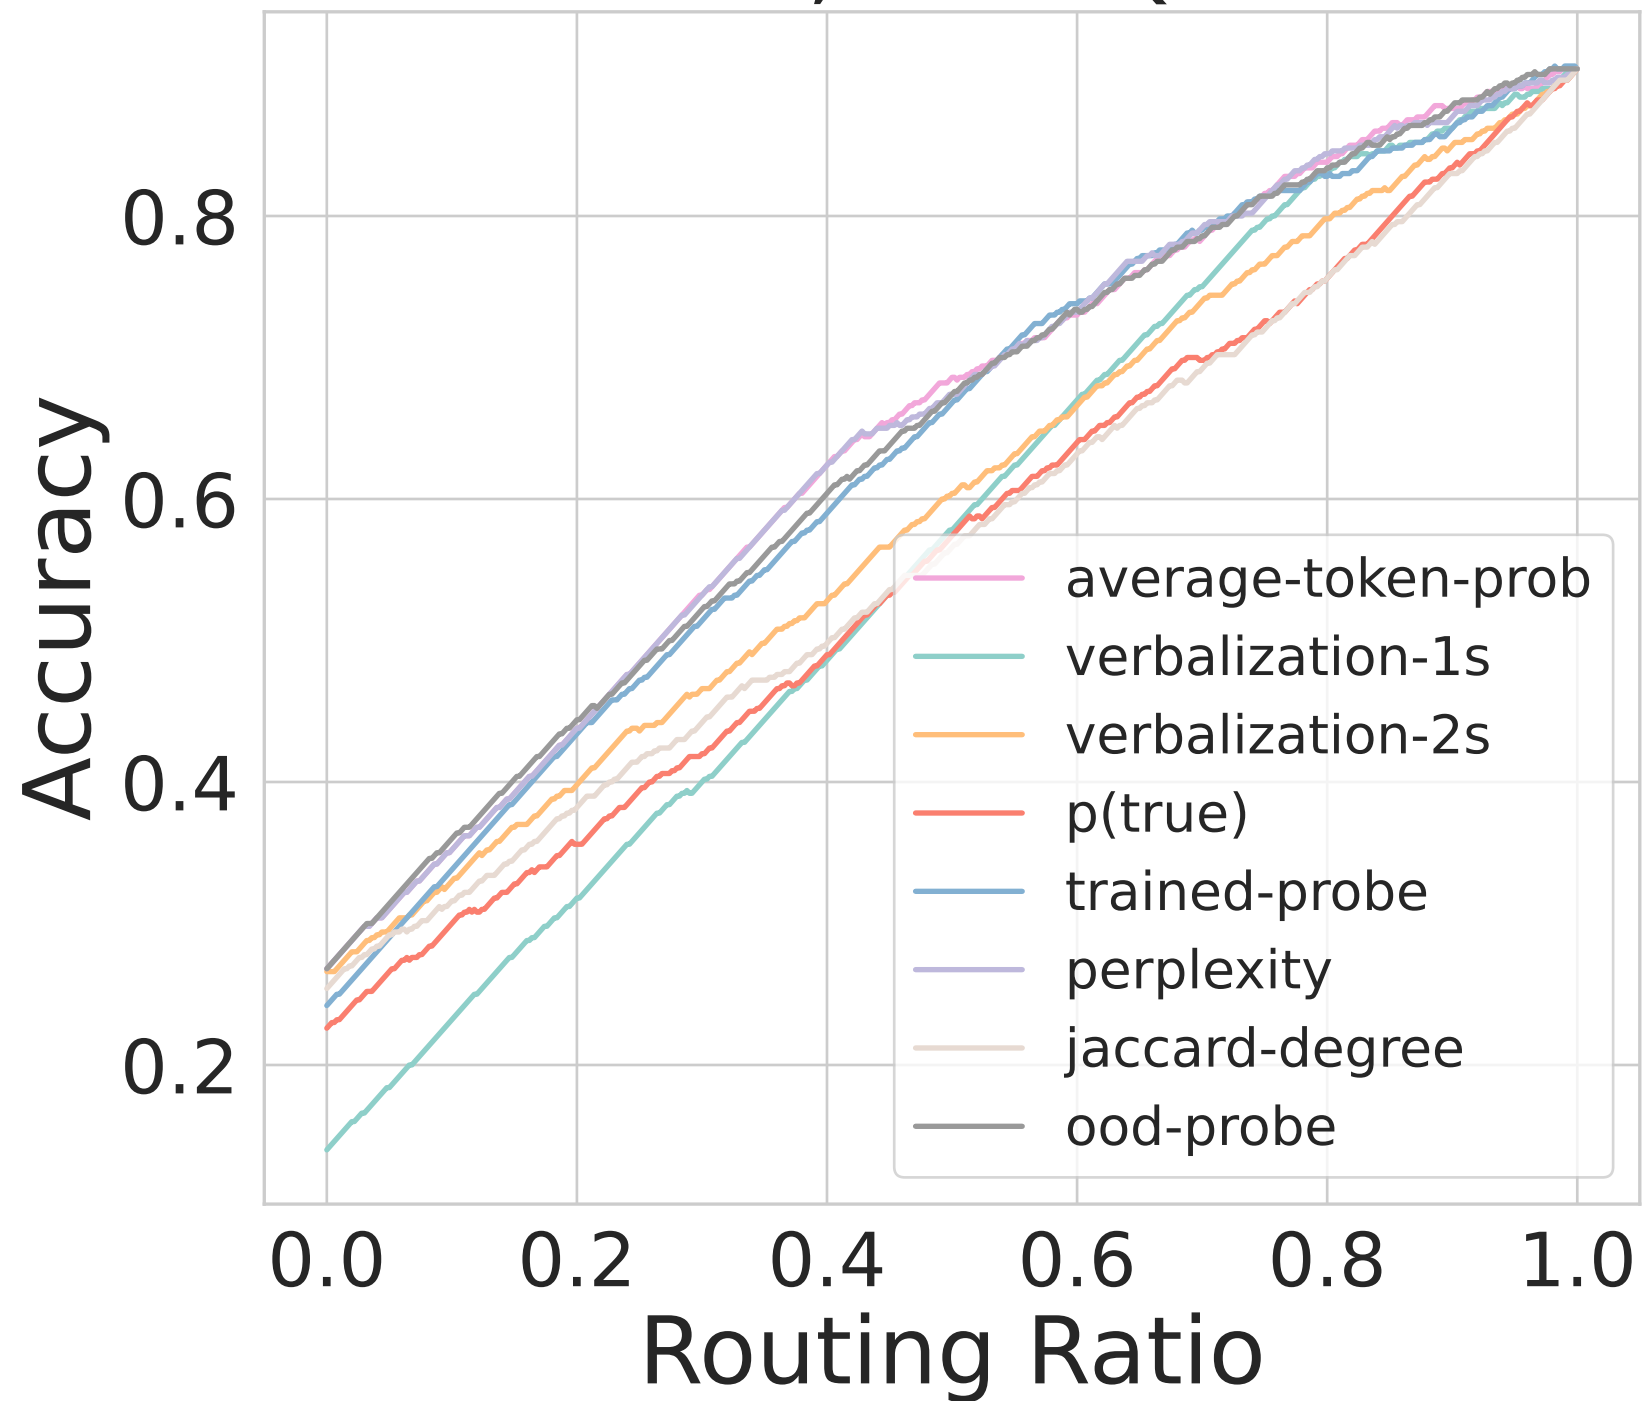

Supplement: supplementary_material [file rr_acc_winogrande_rwkv_qwen32.pdf › Routing_SLM_LLMs/Uncertainty-based Routing/w_legend/to_qwen32/rr_acc_winogrande_rwkv_qwen32.pdf]
