# Supplementary material (part 11 of 14)
Source: ML conference proceedings conference paper supplement (https://openreview.net/forum?id=smdbra3VEi)

**SVAMP, llama-3.2-3b to GPT-4.1 mini**

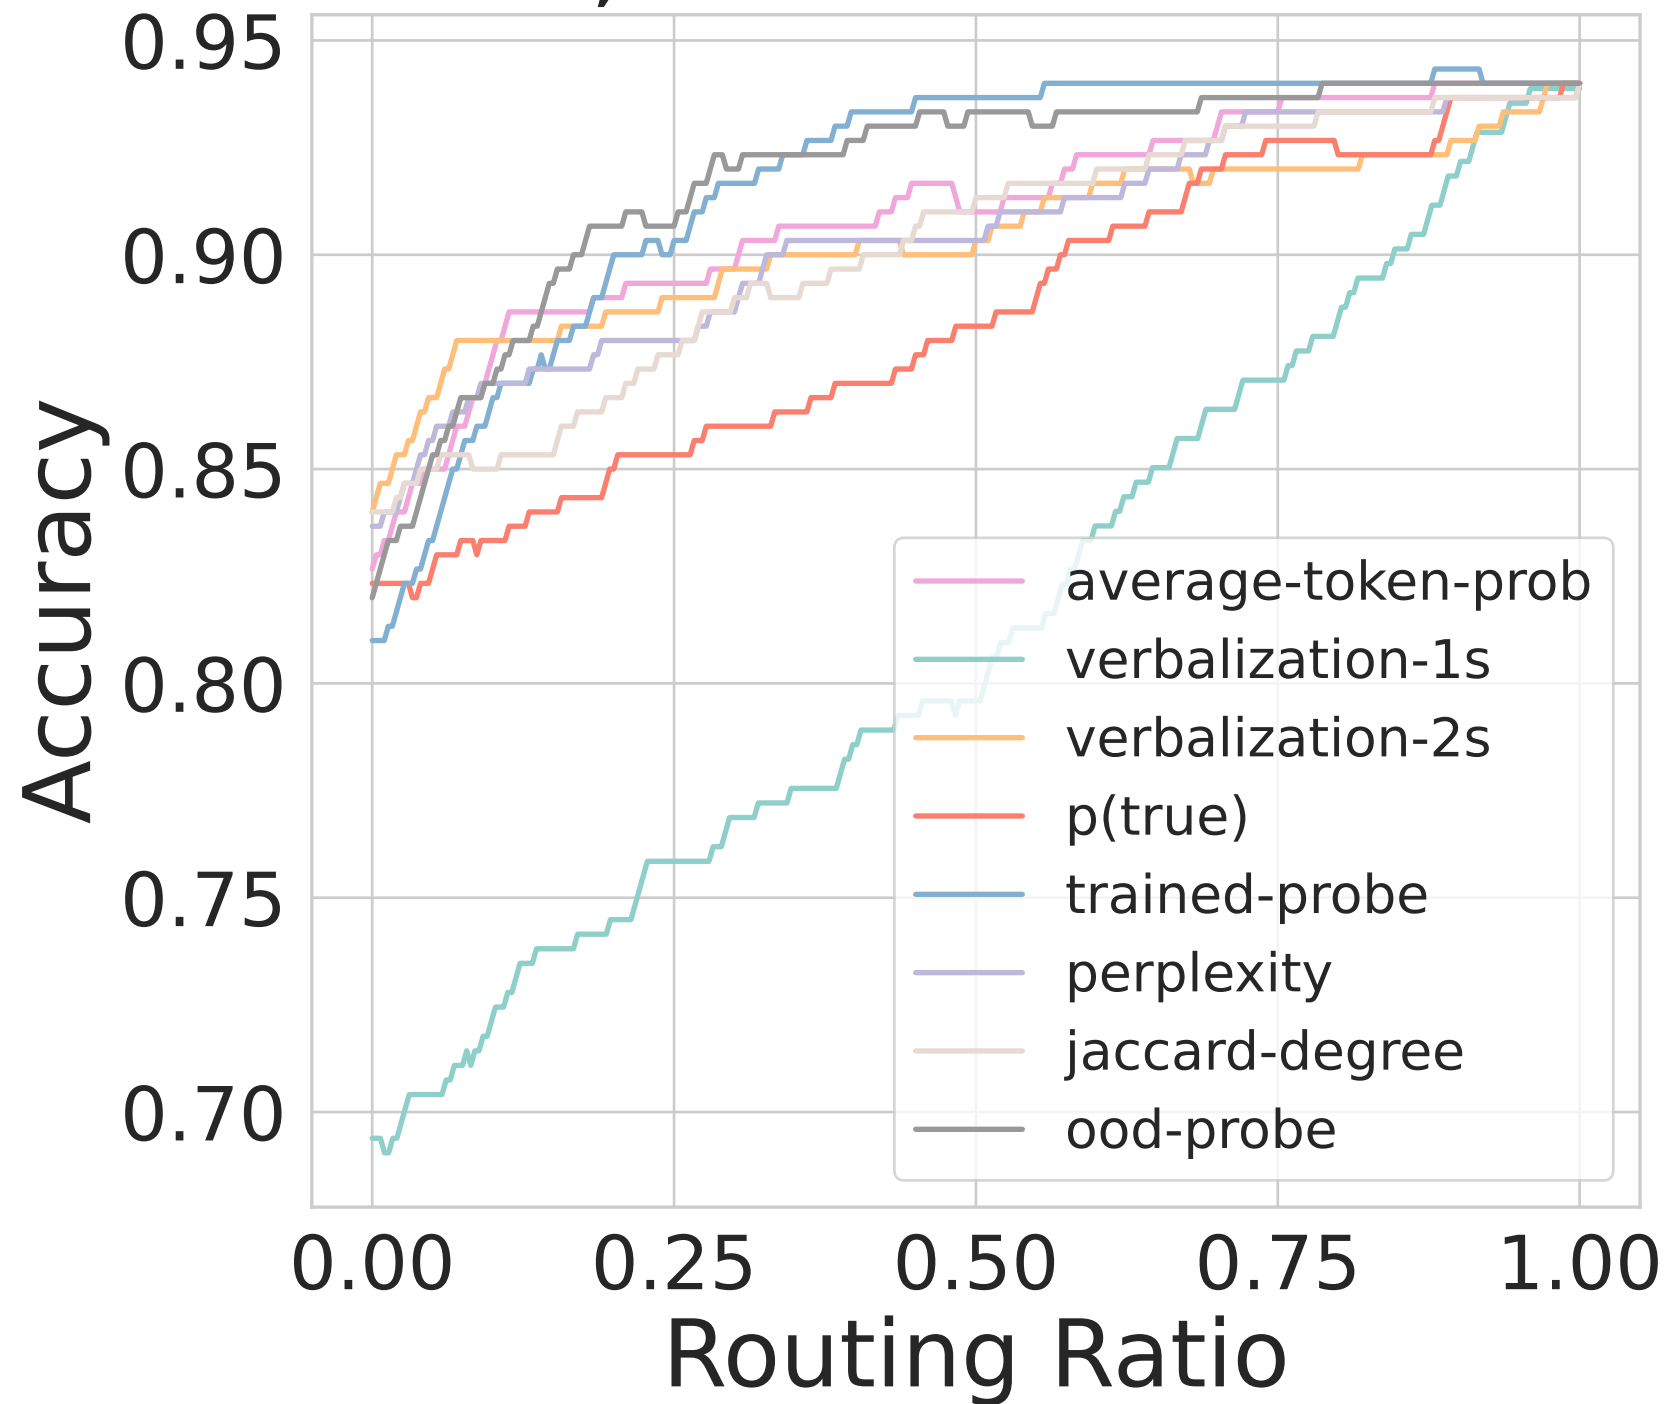

Supplement: supplementary_material [file rr_acc_svamp_llama-3.2-3b_gpt41.pdf › Routing_SLM_LLMs/Uncertainty-based Routing/w_legend/to_gpt41/rr_acc_svamp_llama-3.2-3b_gpt41.pdf]

## SVAMP, phi-3.5-mini to GPT-4.1 mini

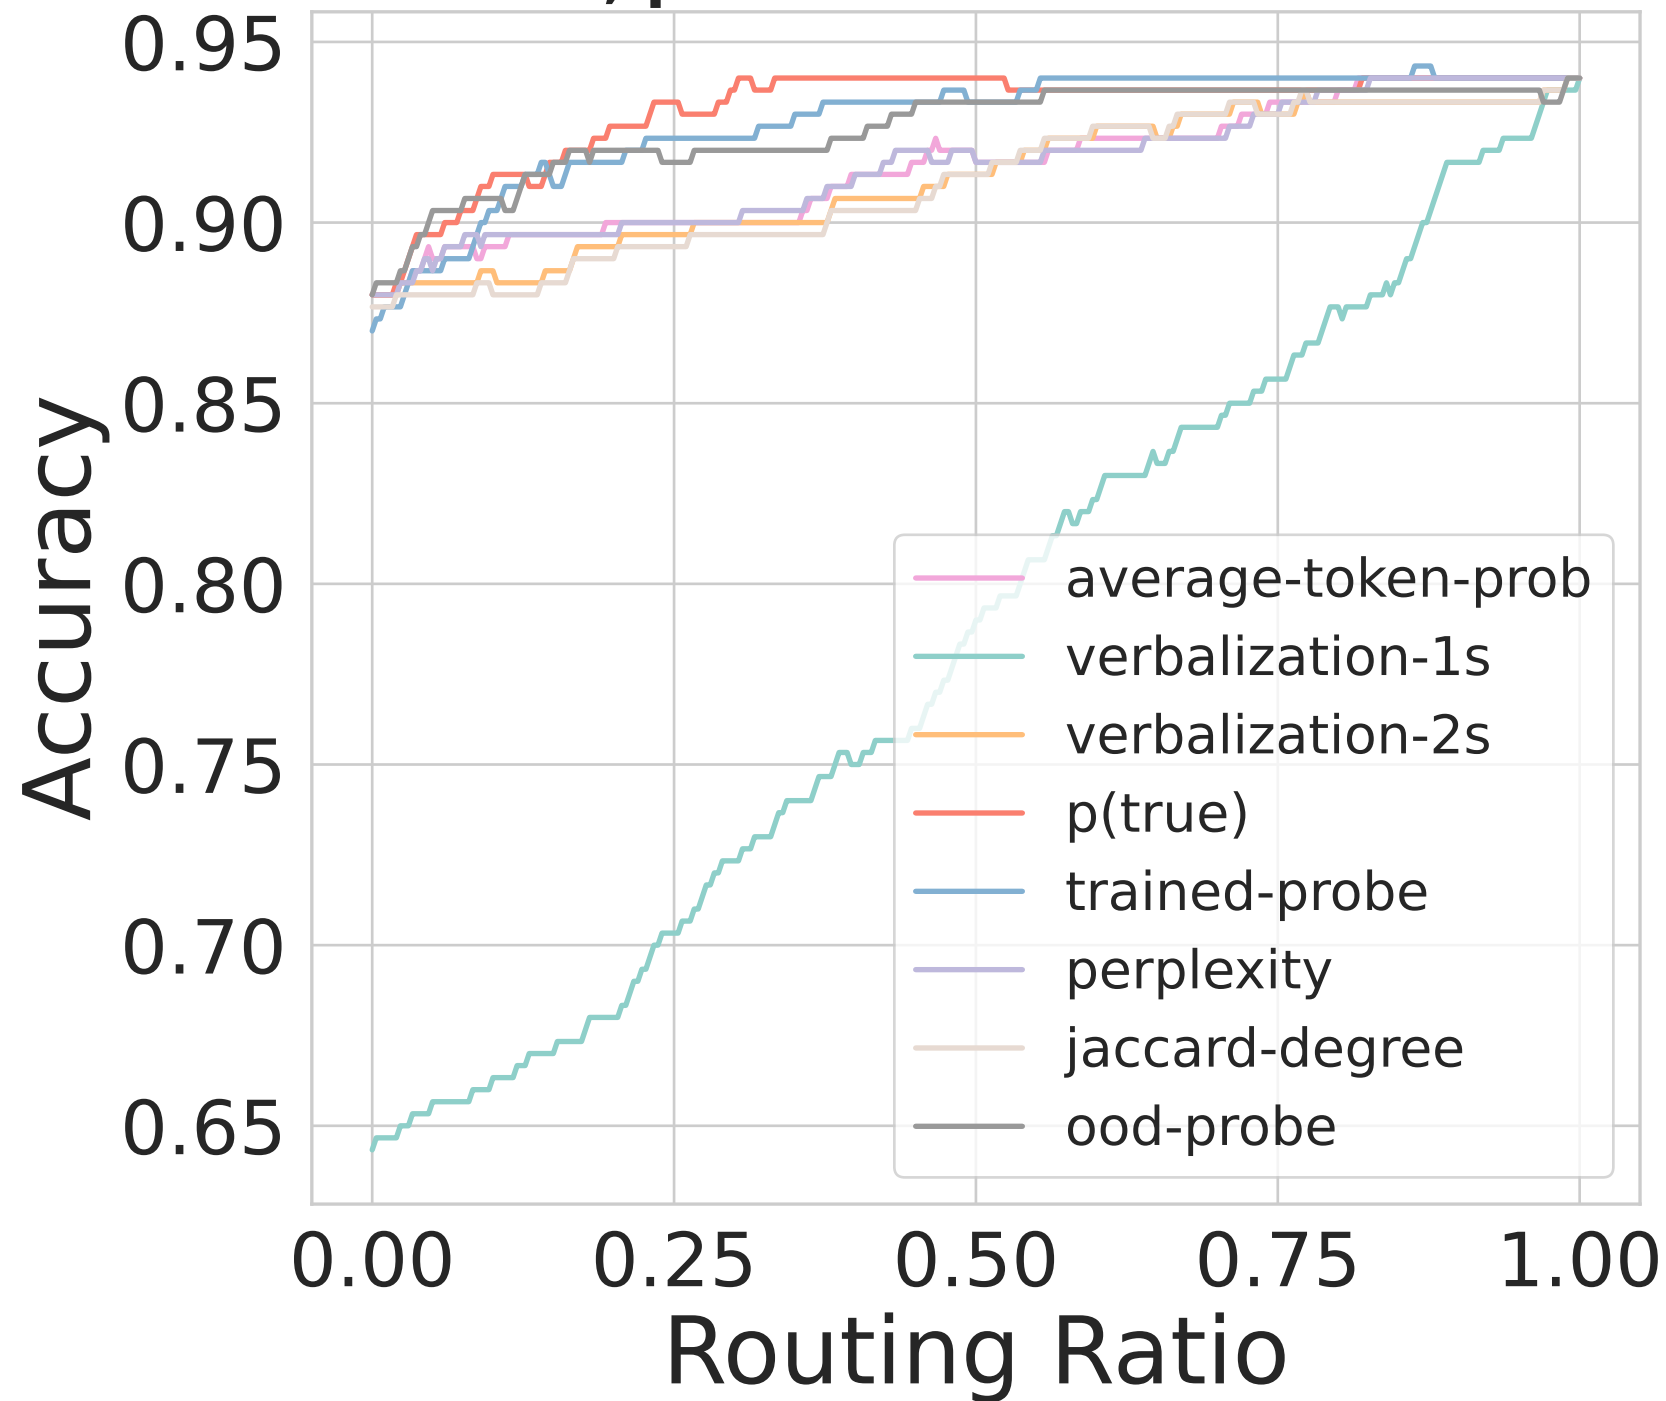

Supplement: supplementary_material [file rr_acc_svamp_phi-3.5-mini_gpt41.pdf › Routing_SLM_LLMs/Uncertainty-based Routing/w_legend/to_gpt41/rr_acc_svamp_phi-3.5-mini_gpt41.pdf]

# SVAMP, phi-4-mini-reasoning to GPT-4.1 mini

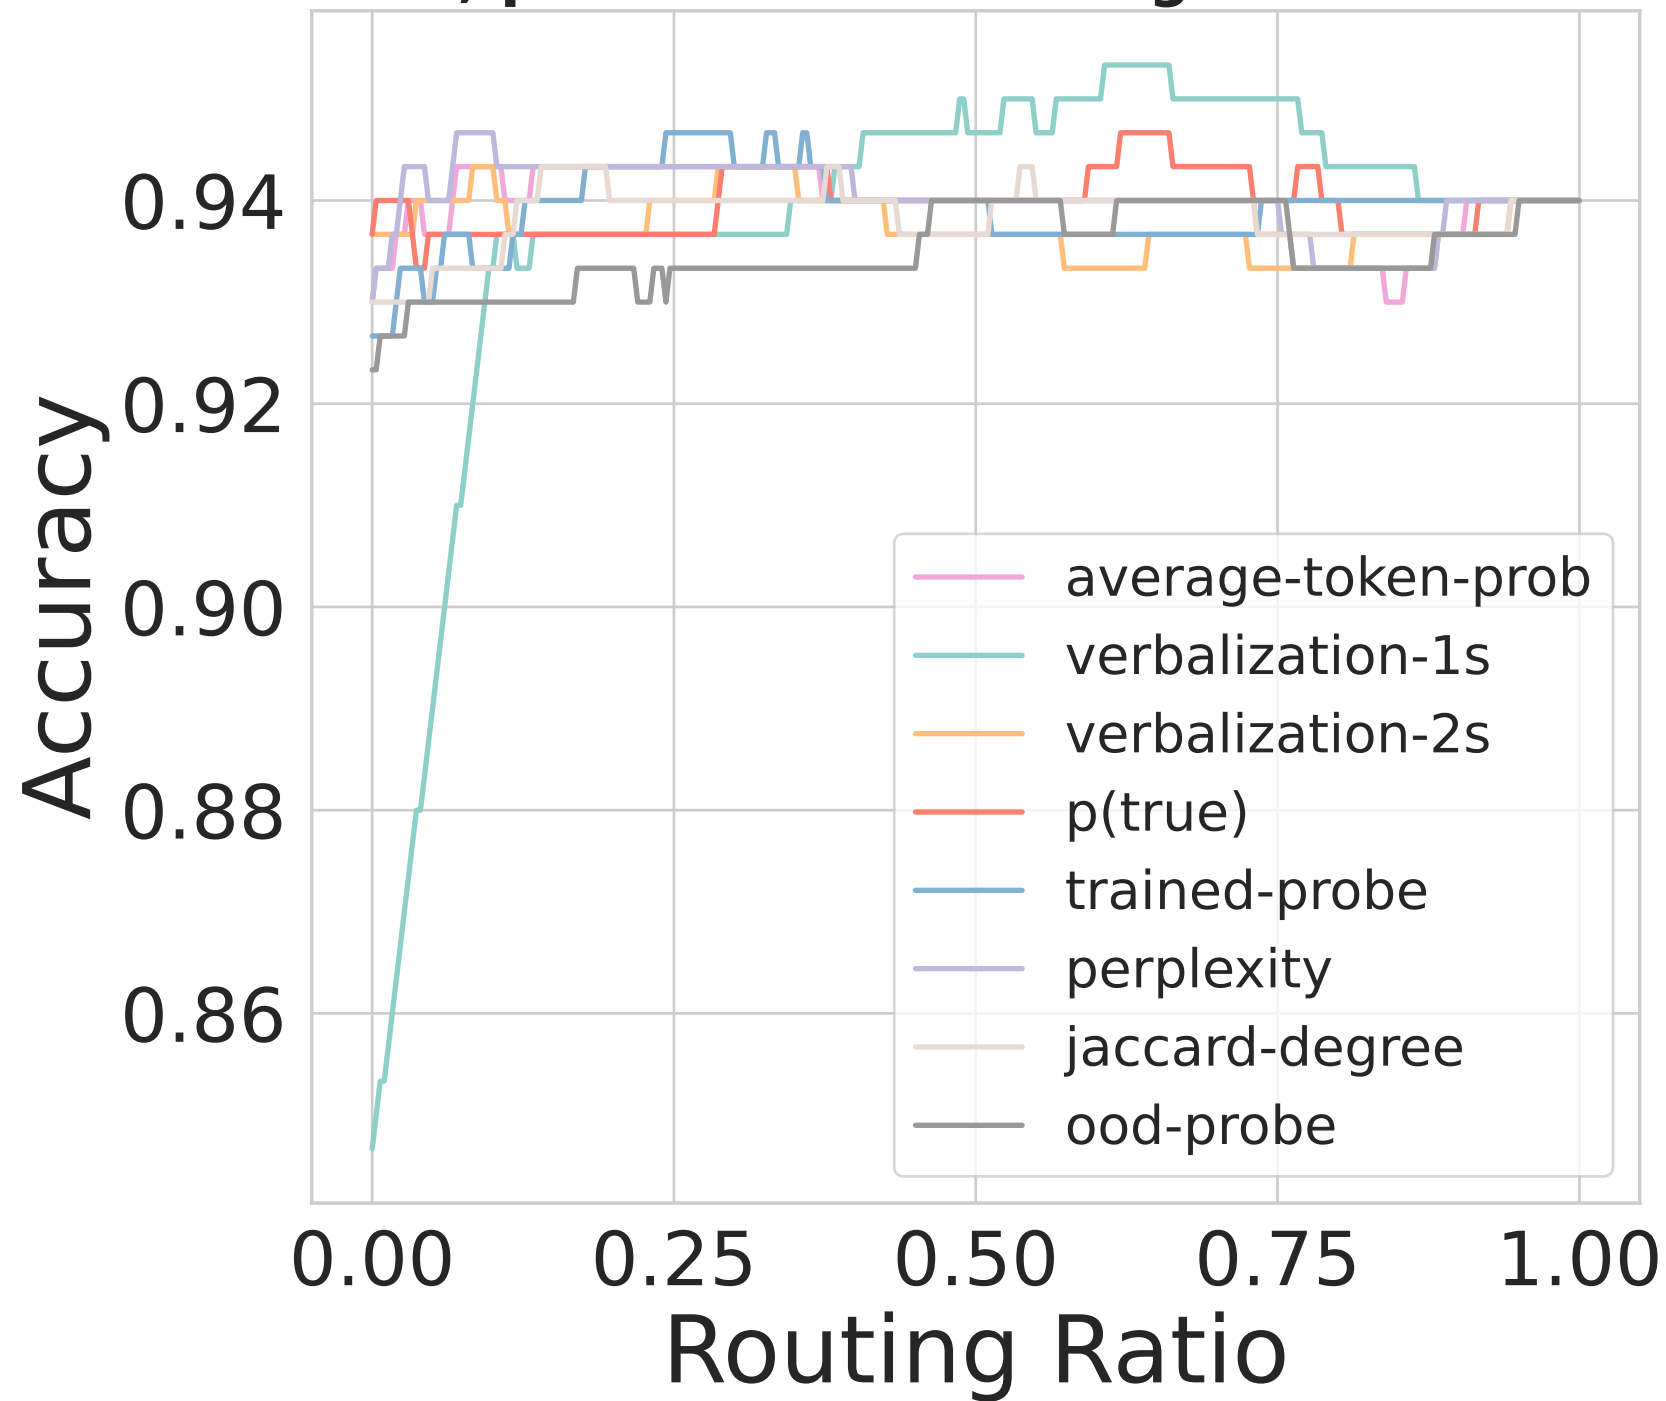

Supplement: supplementary_material [file rr_acc_svamp_phi-4-mini-reasoning_gpt41.pdf › Routing_SLM_LLMs/Uncertainty-based Routing/w_legend/to_gpt41/rr_acc_svamp_phi-4-mini-reasoning_gpt41.pdf]

**SVAMP, rwkv to GPT-4.1 mini**

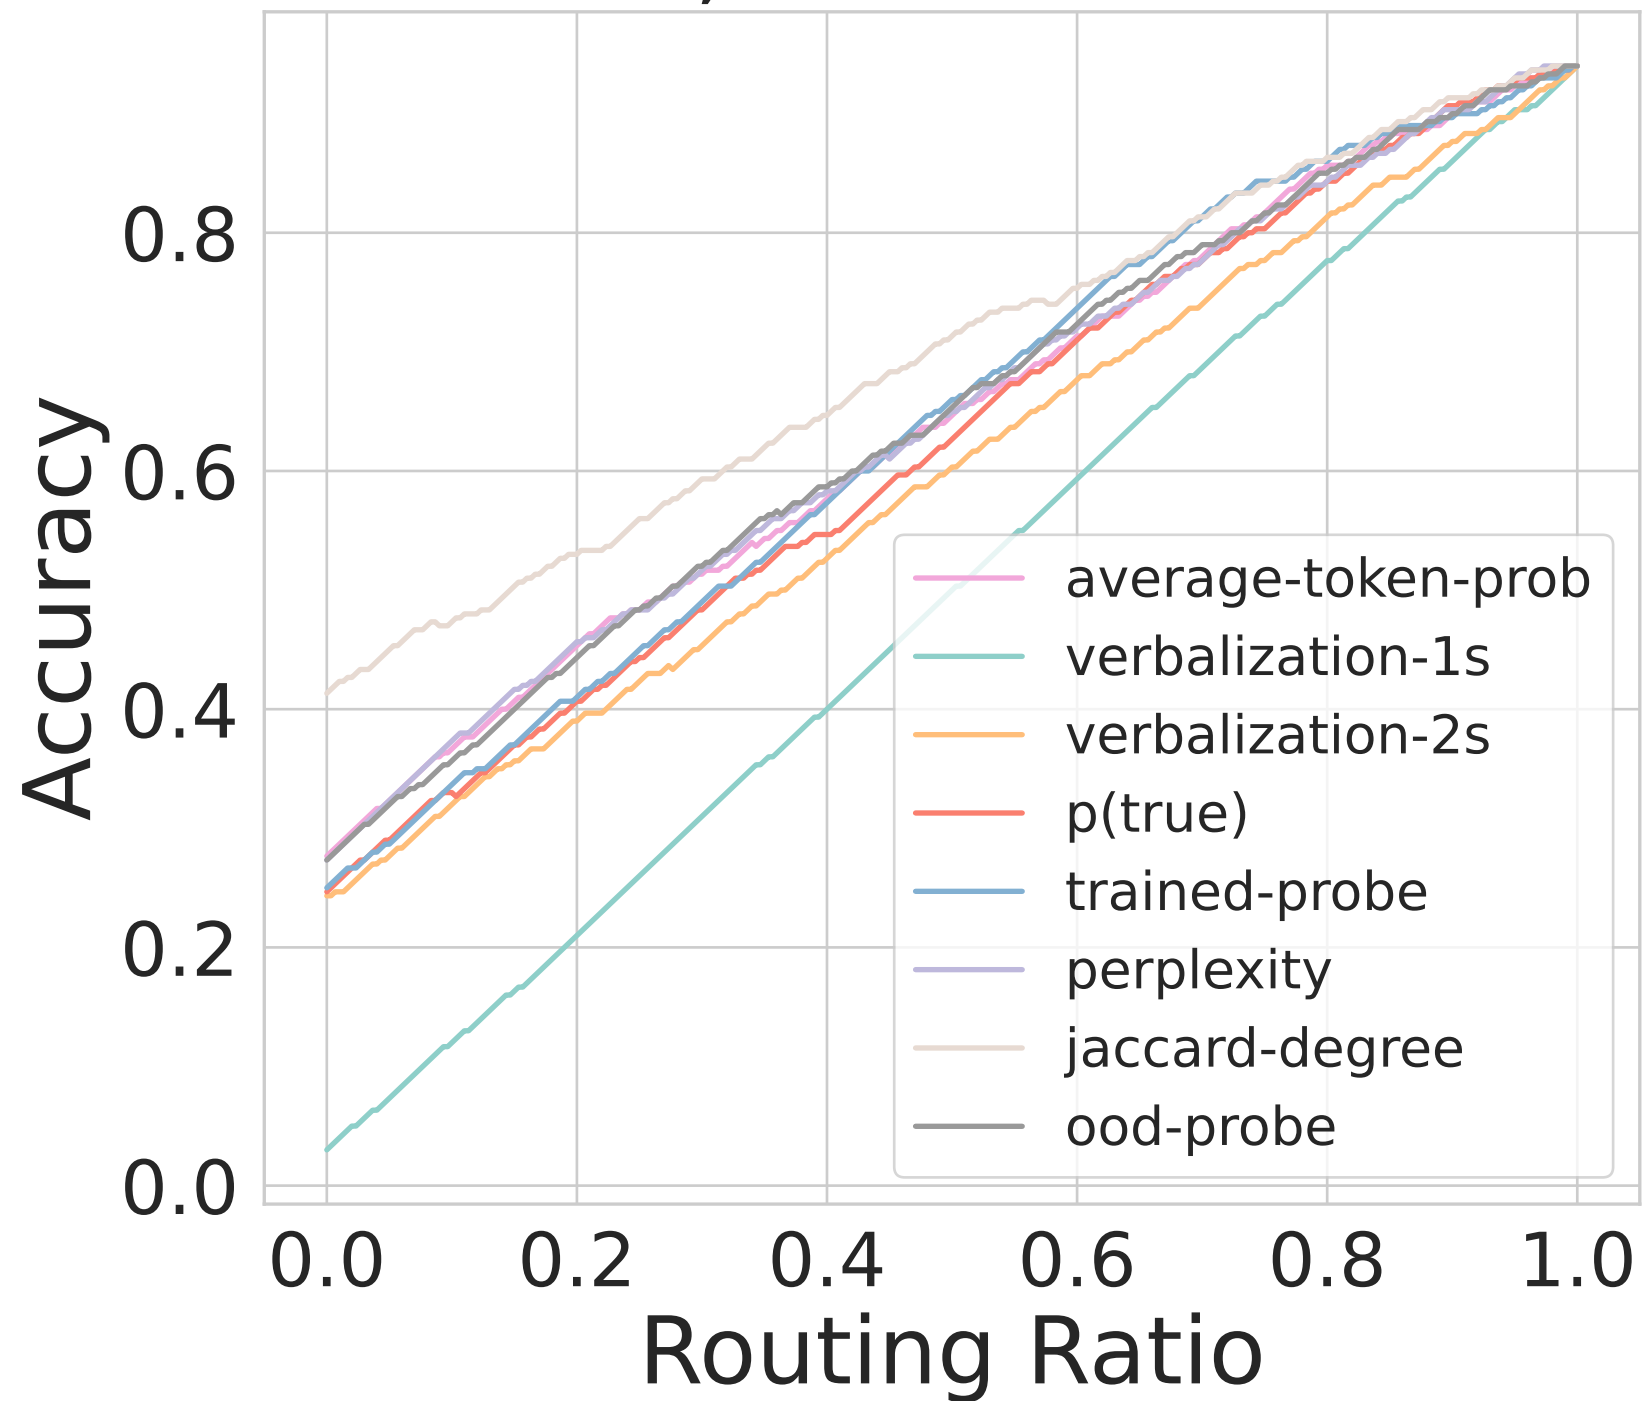

Supplement: supplementary_material [file rr_acc_svamp_rwkv_gpt41.pdf › Routing_SLM_LLMs/Uncertainty-based Routing/w_legend/to_gpt41/rr_acc_svamp_rwkv_gpt41.pdf]

TruthfulQA, Qwen3-0.6B to GPT-4.1 mini

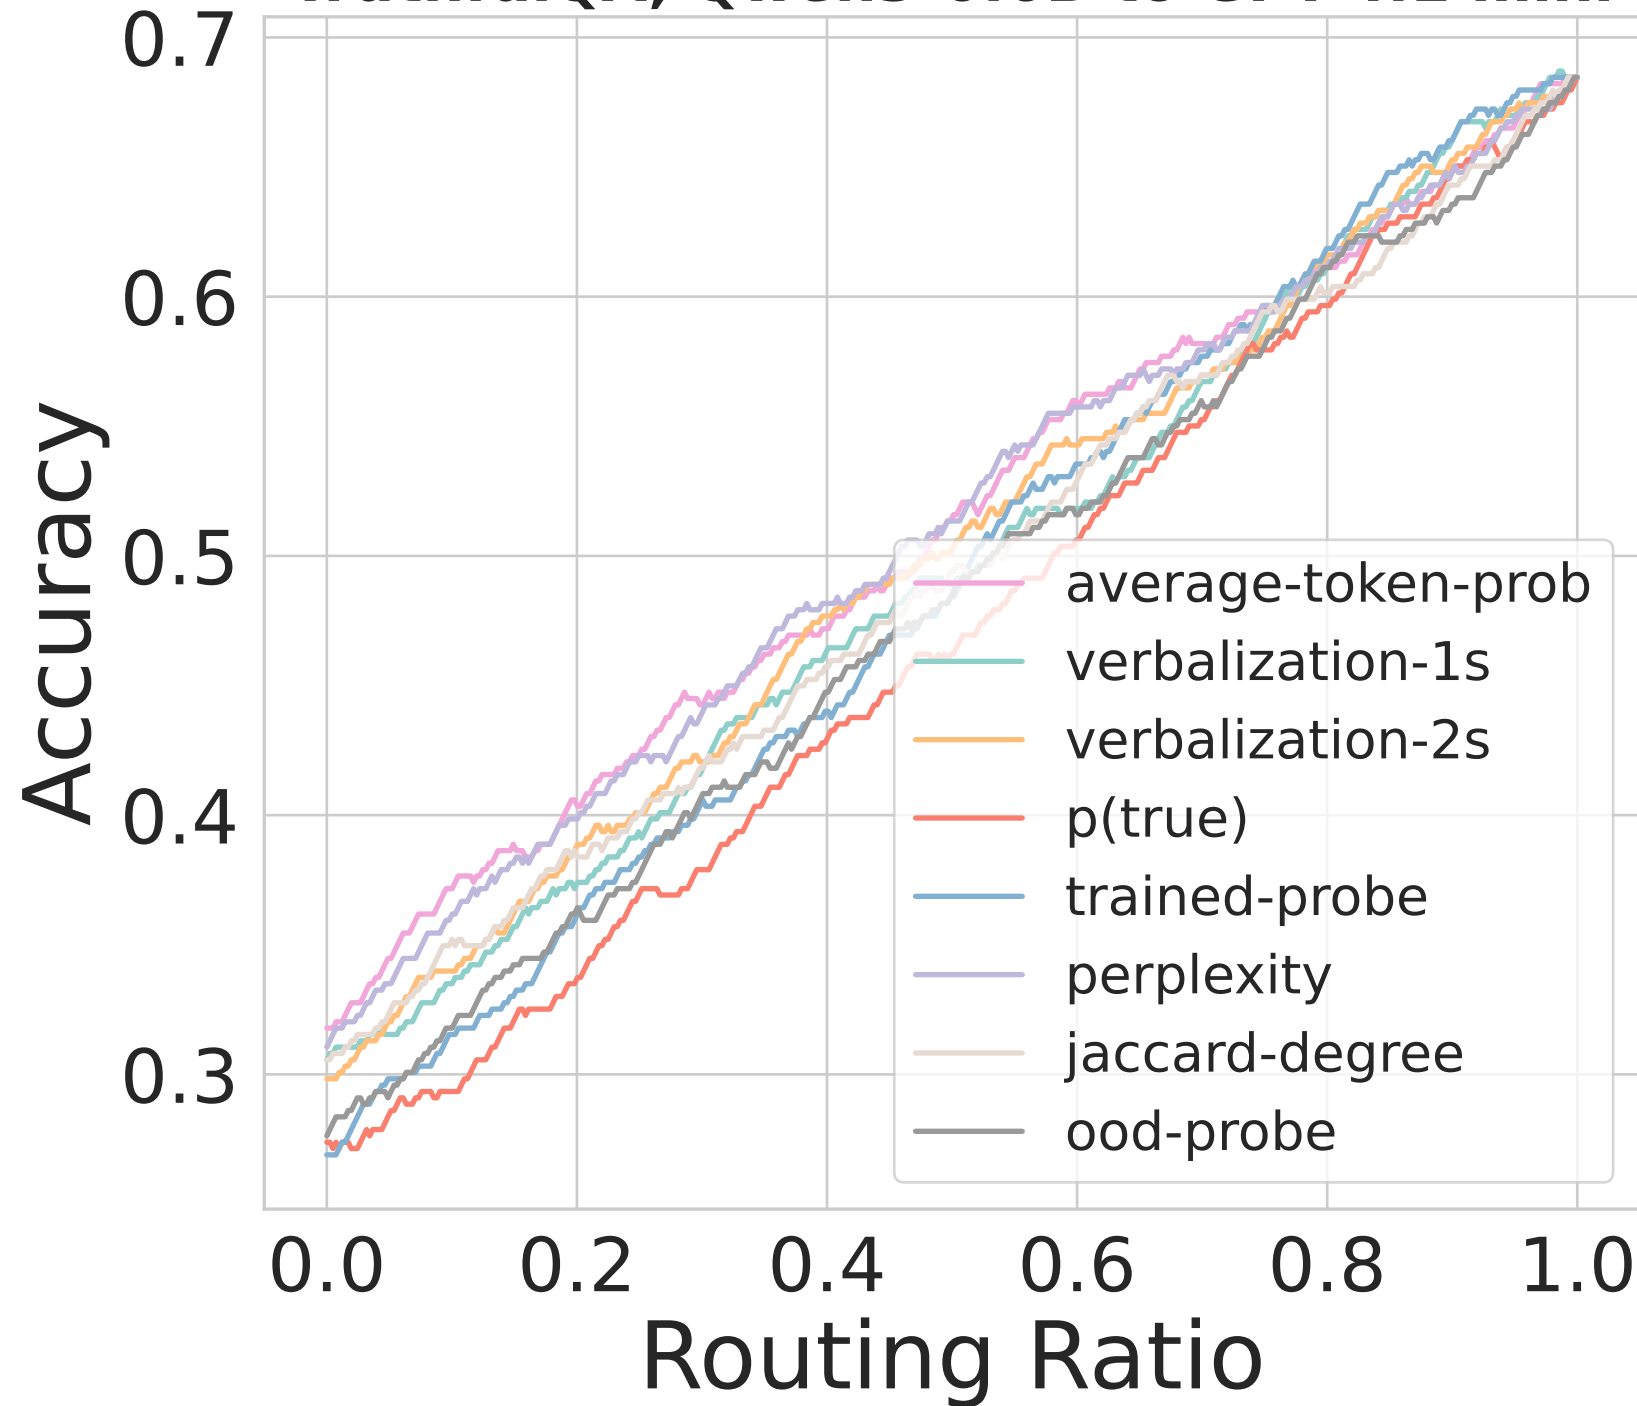

Supplement: supplementary_material [file rr_acc_truthful_qa_Qwen3-0.6B_gpt41.pdf › Routing_SLM_LLMs/Uncertainty-based Routing/w_legend/to_gpt41/rr_acc_truthful_qa_Qwen3-0.6B_gpt41.pdf]

## TruthfulQA, Qwen3-1.7B to GPT-4.1 mini

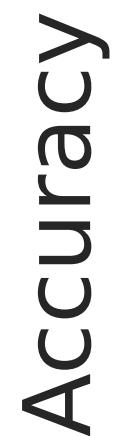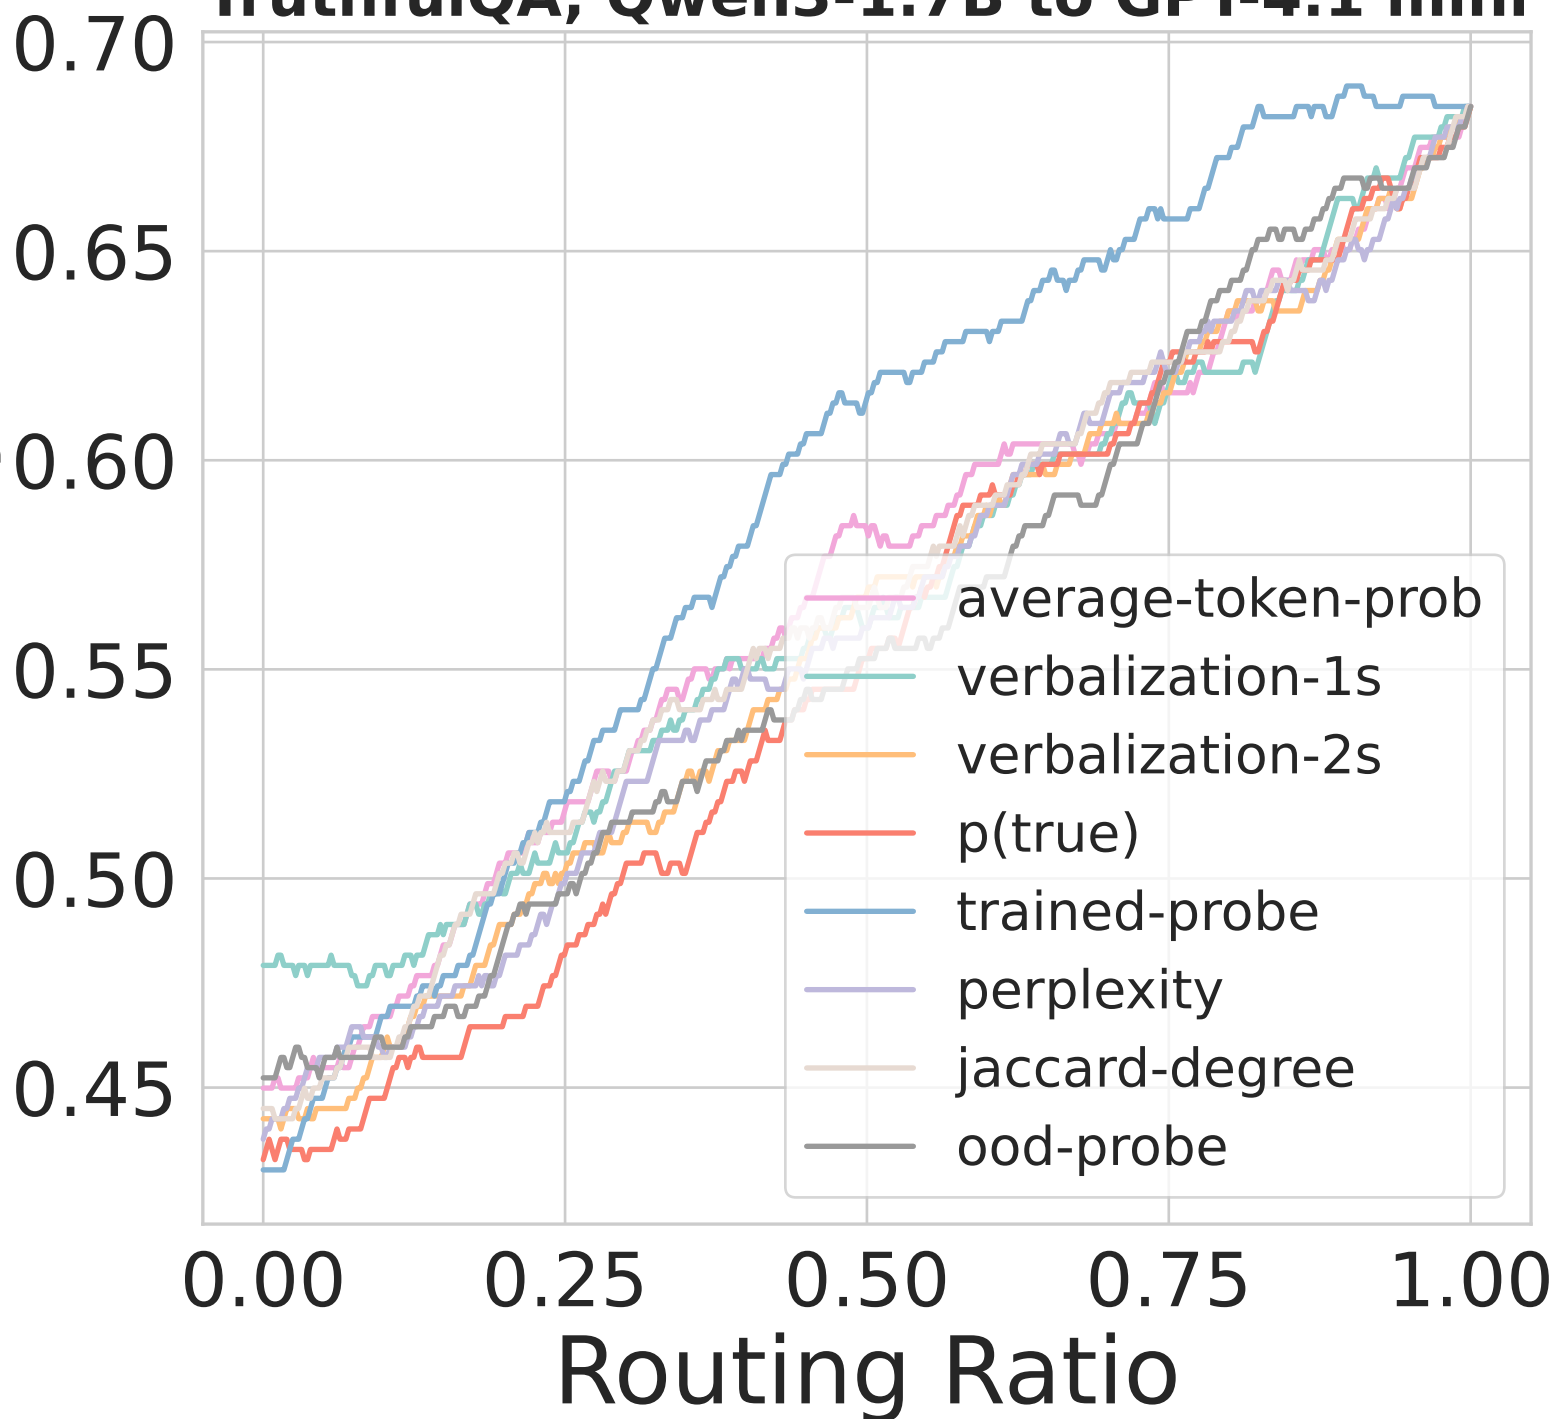

Supplement: supplementary_material [file rr_acc_truthful_qa_Qwen3-1.7B_gpt41.pdf › Routing_SLM_LLMs/Uncertainty-based Routing/w_legend/to_gpt41/rr_acc_truthful_qa_Qwen3-1.7B_gpt41.pdf]

**TruthfulQA, Qwen3-4B to GPT-4.1 mini**

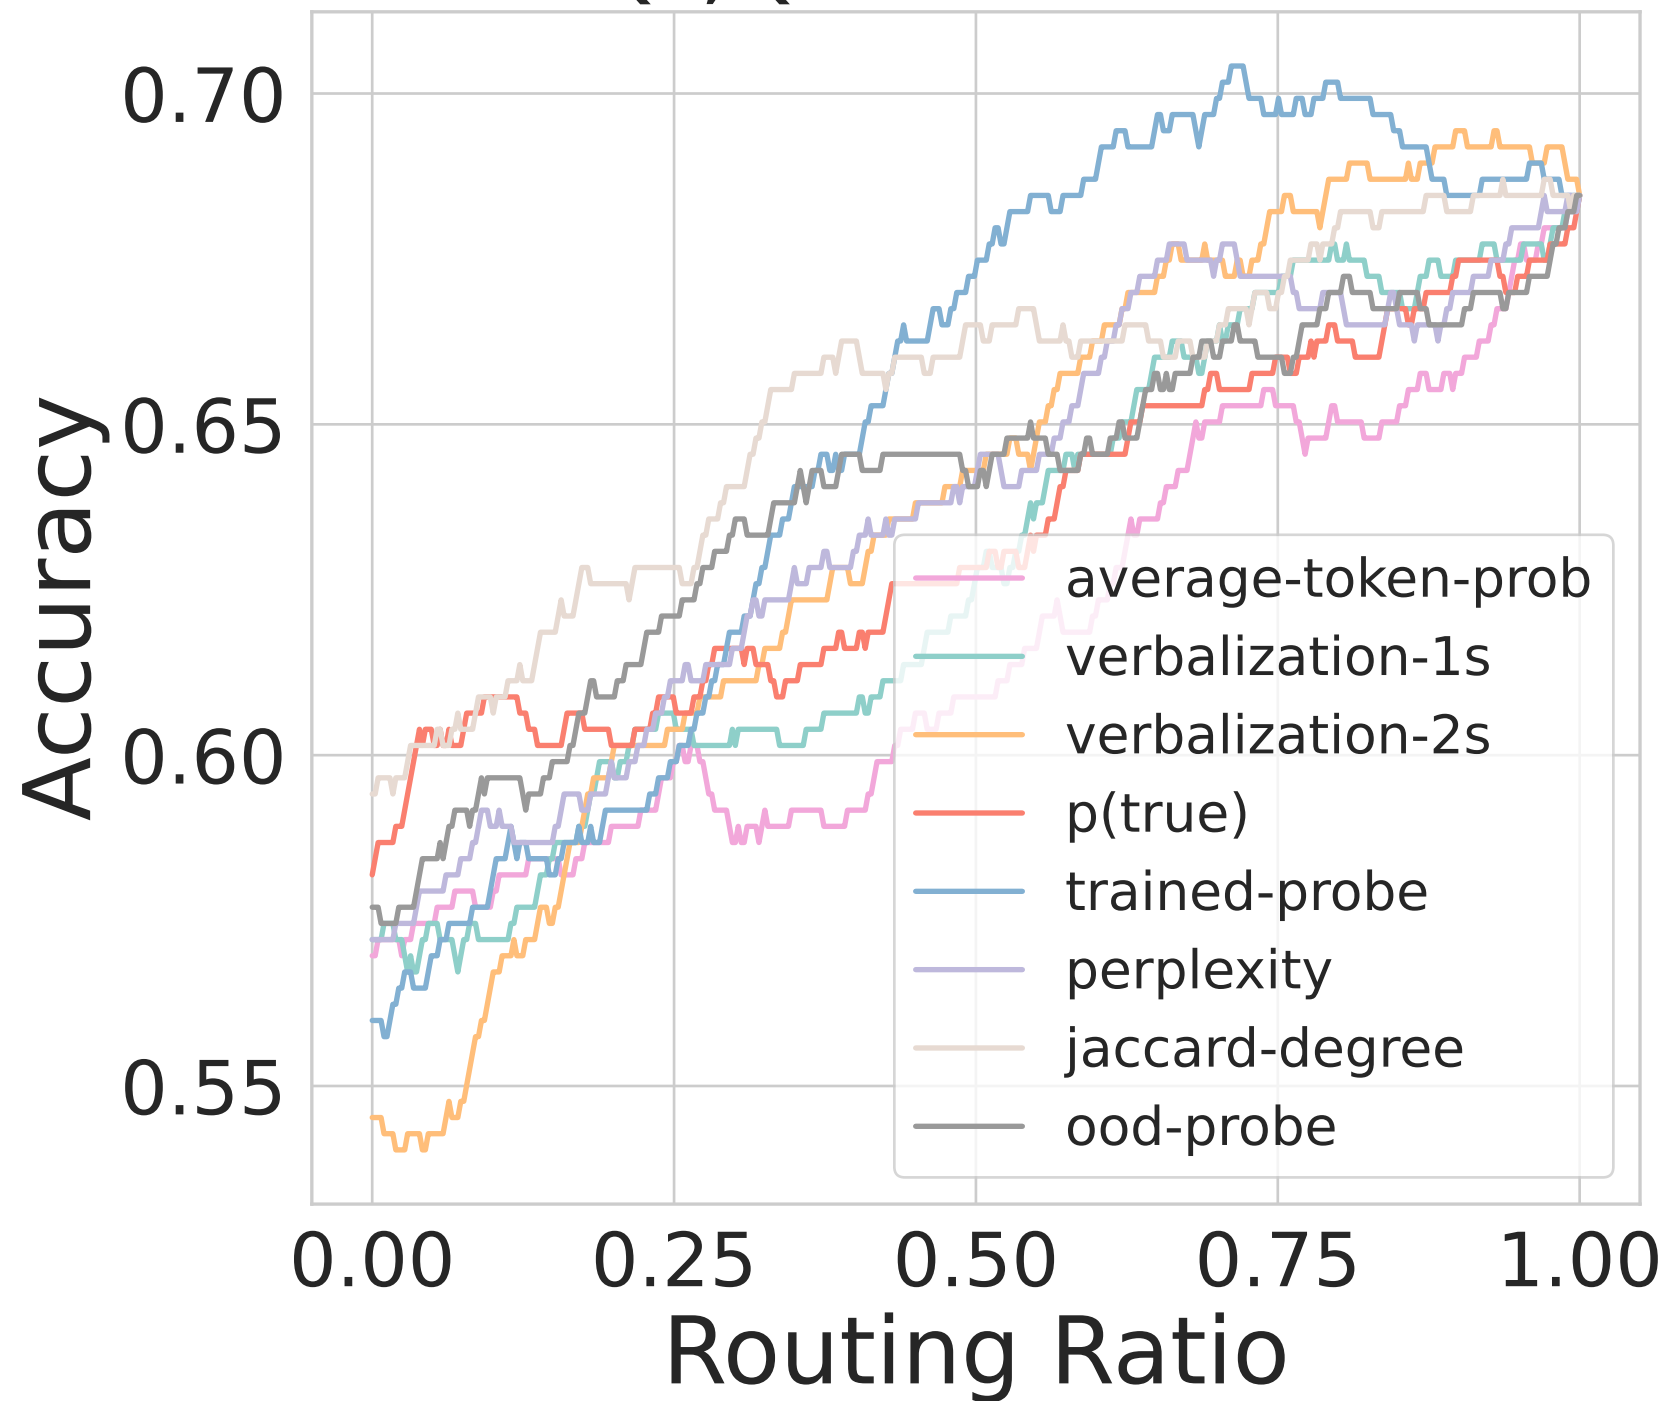

Supplement: supplementary_material [file rr_acc_truthful_qa_Qwen3-4B_gpt41.pdf › Routing_SLM_LLMs/Uncertainty-based Routing/w_legend/to_gpt41/rr_acc_truthful_qa_Qwen3-4B_gpt41.pdf]

**TruthfulQA, llama-3.1-8b to GPT-4.1 mini**

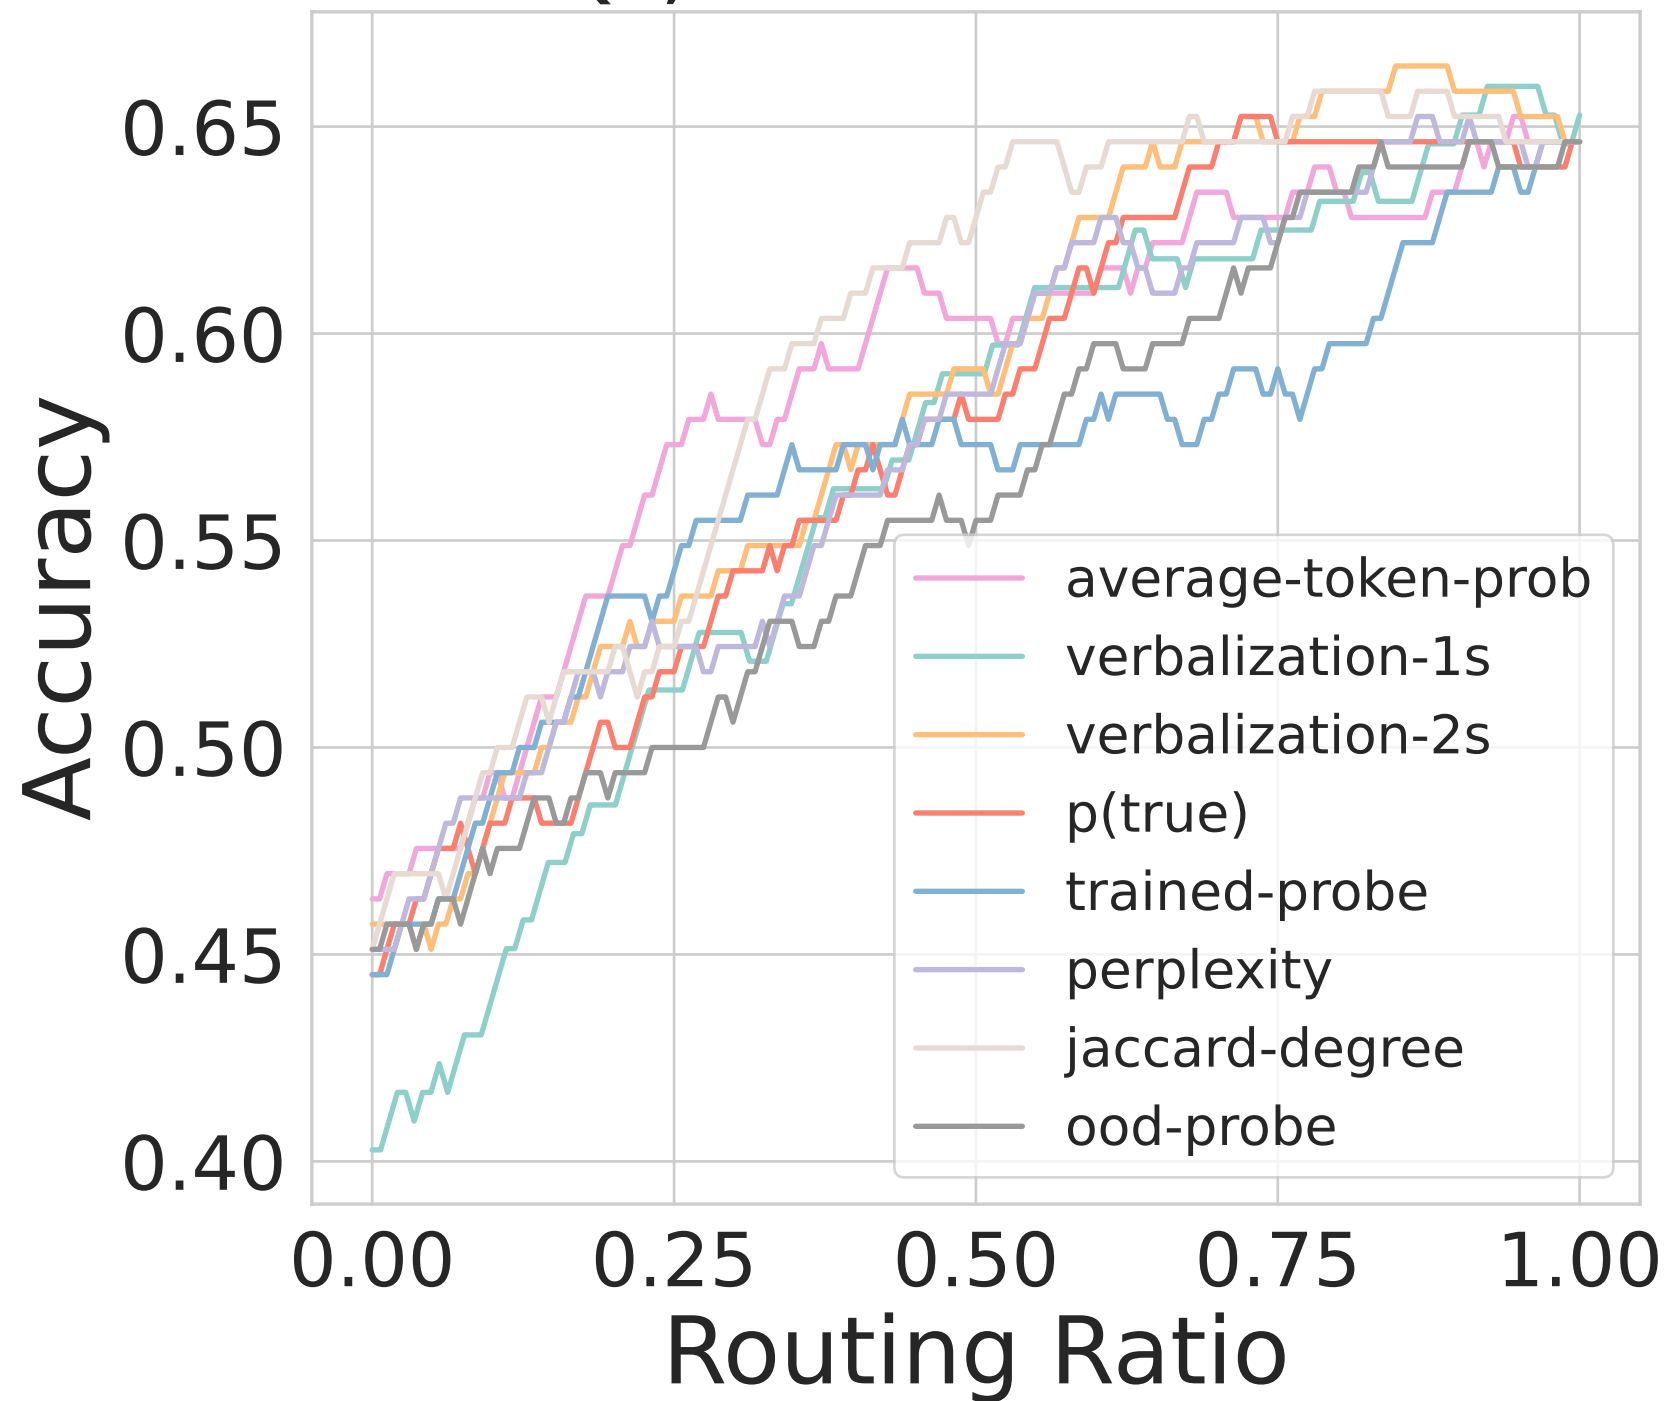

Supplement: supplementary_material [file rr_acc_truthful_qa_llama-3.1-8b_gpt41.pdf › Routing_SLM_LLMs/Uncertainty-based Routing/w_legend/to_gpt41/rr_acc_truthful_qa_llama-3.1-8b_gpt41.pdf]

**TruthfulQA, llama-3.2-1b to GPT-4.1 mini**

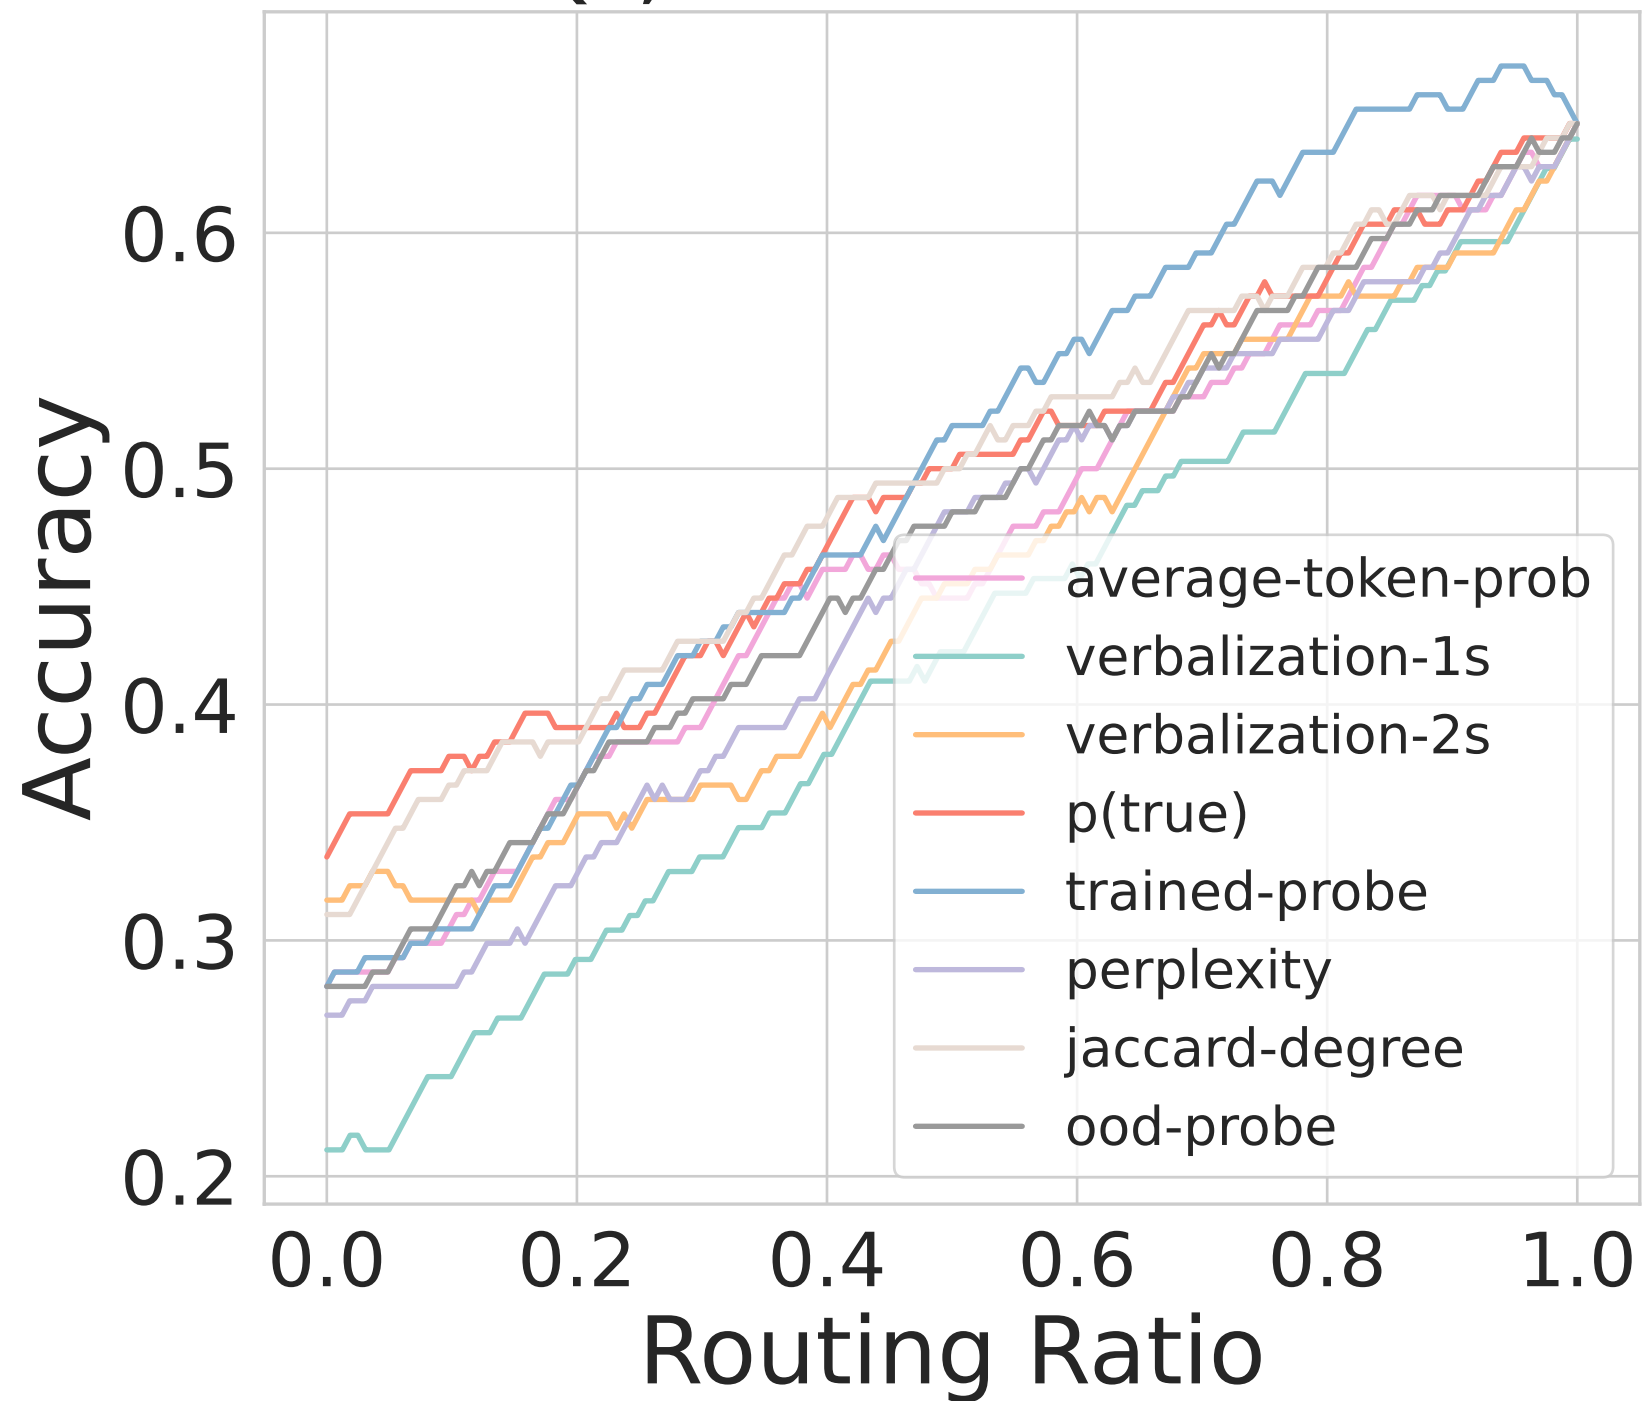

Supplement: supplementary_material [file rr_acc_truthful_qa_llama-3.2-1b_gpt41.pdf › Routing_SLM_LLMs/Uncertainty-based Routing/w_legend/to_gpt41/rr_acc_truthful_qa_llama-3.2-1b_gpt41.pdf]

## TruthfulQA, llama-3.2-3b to GPT-4.1 mini

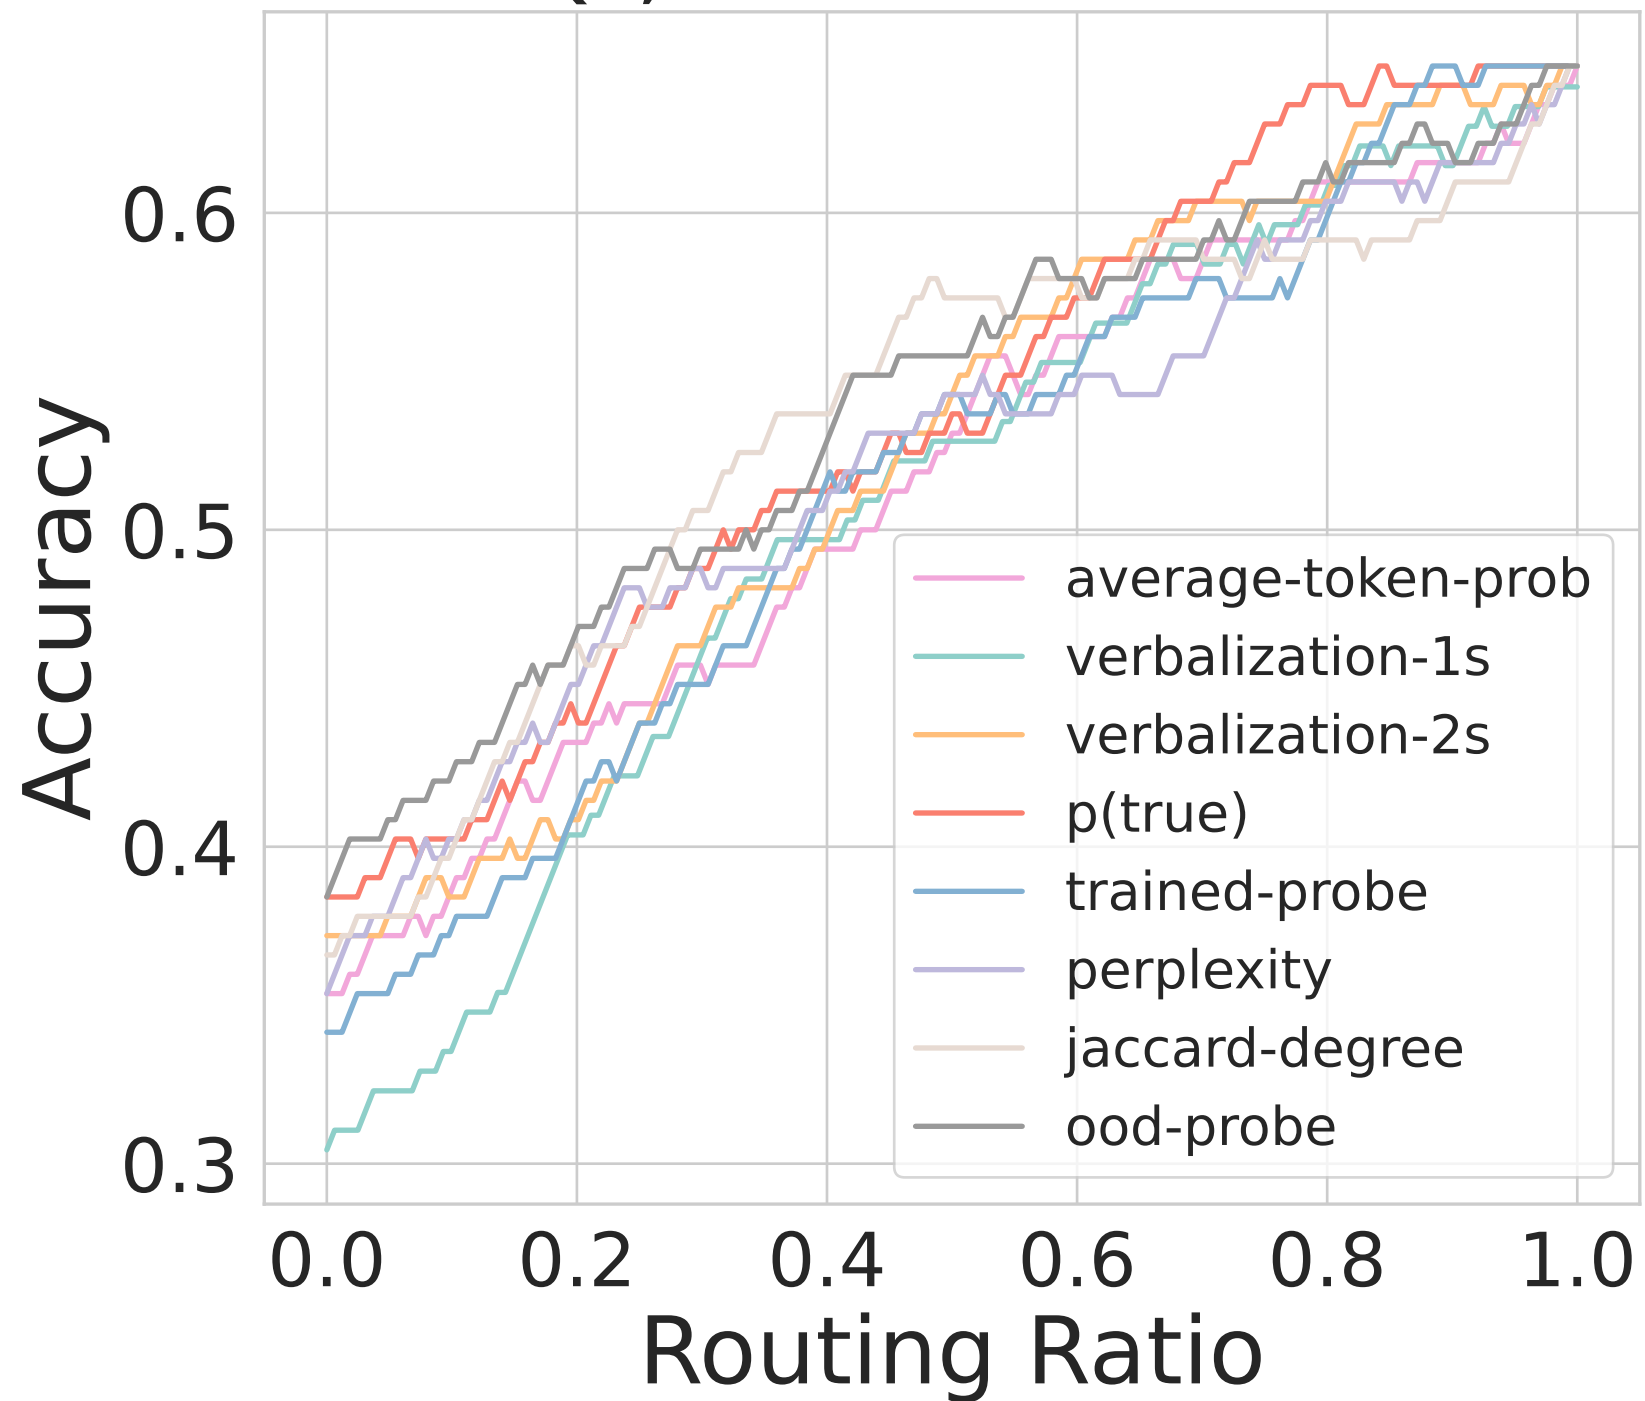

Supplement: supplementary_material [file rr_acc_truthful_qa_llama-3.2-3b_gpt41.pdf › Routing_SLM_LLMs/Uncertainty-based Routing/w_legend/to_gpt41/rr_acc_truthful_qa_llama-3.2-3b_gpt41.pdf]

## TruthfulQA, mistral-7b to GPT-4.1 mini

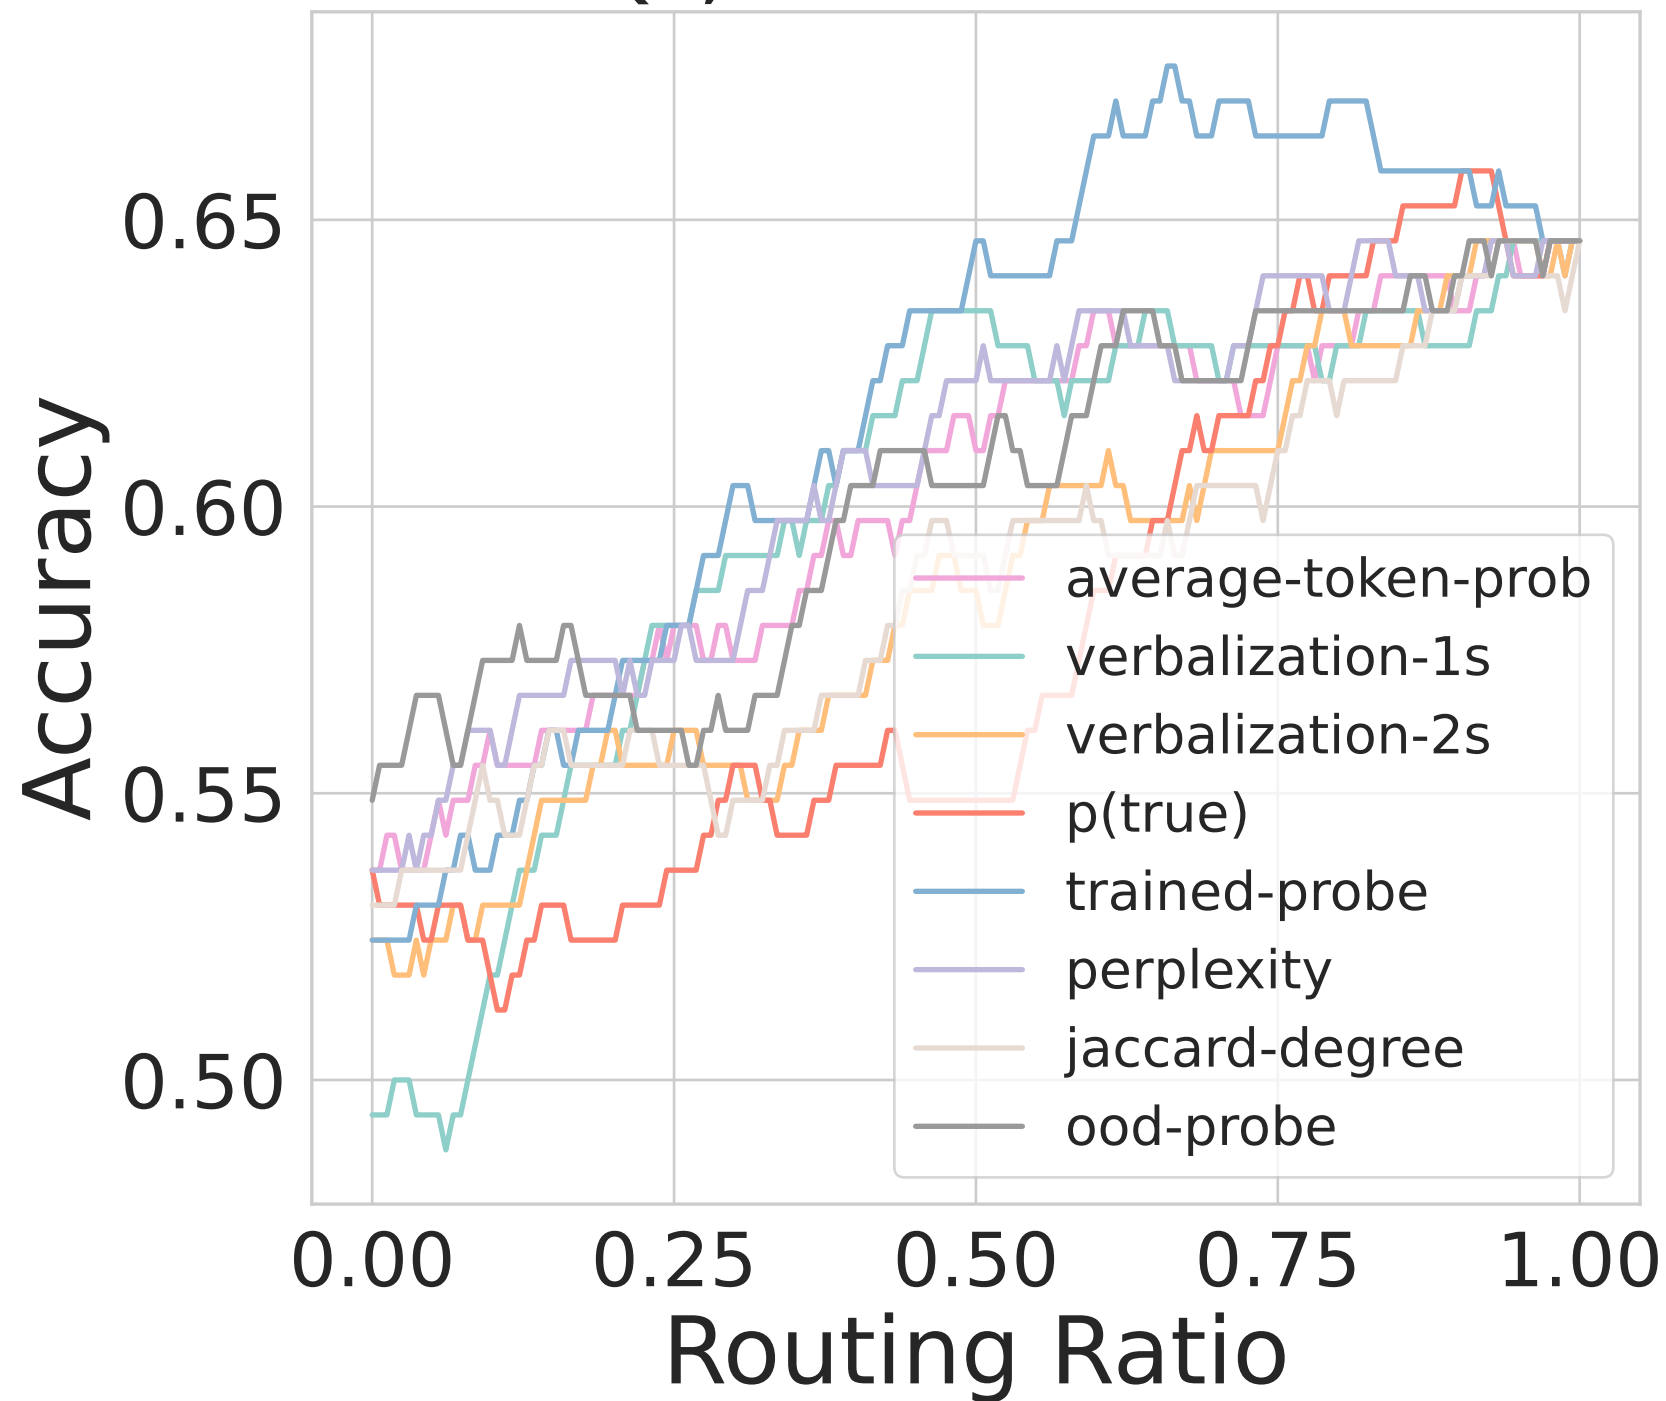

Supplement: supplementary_material [file rr_acc_truthful_qa_mistral-7b_gpt41.pdf › Routing_SLM_LLMs/Uncertainty-based Routing/w_legend/to_gpt41/rr_acc_truthful_qa_mistral-7b_gpt41.pdf]

TruthfulQA, phi-3.5-mini to GPT-4.1 mini

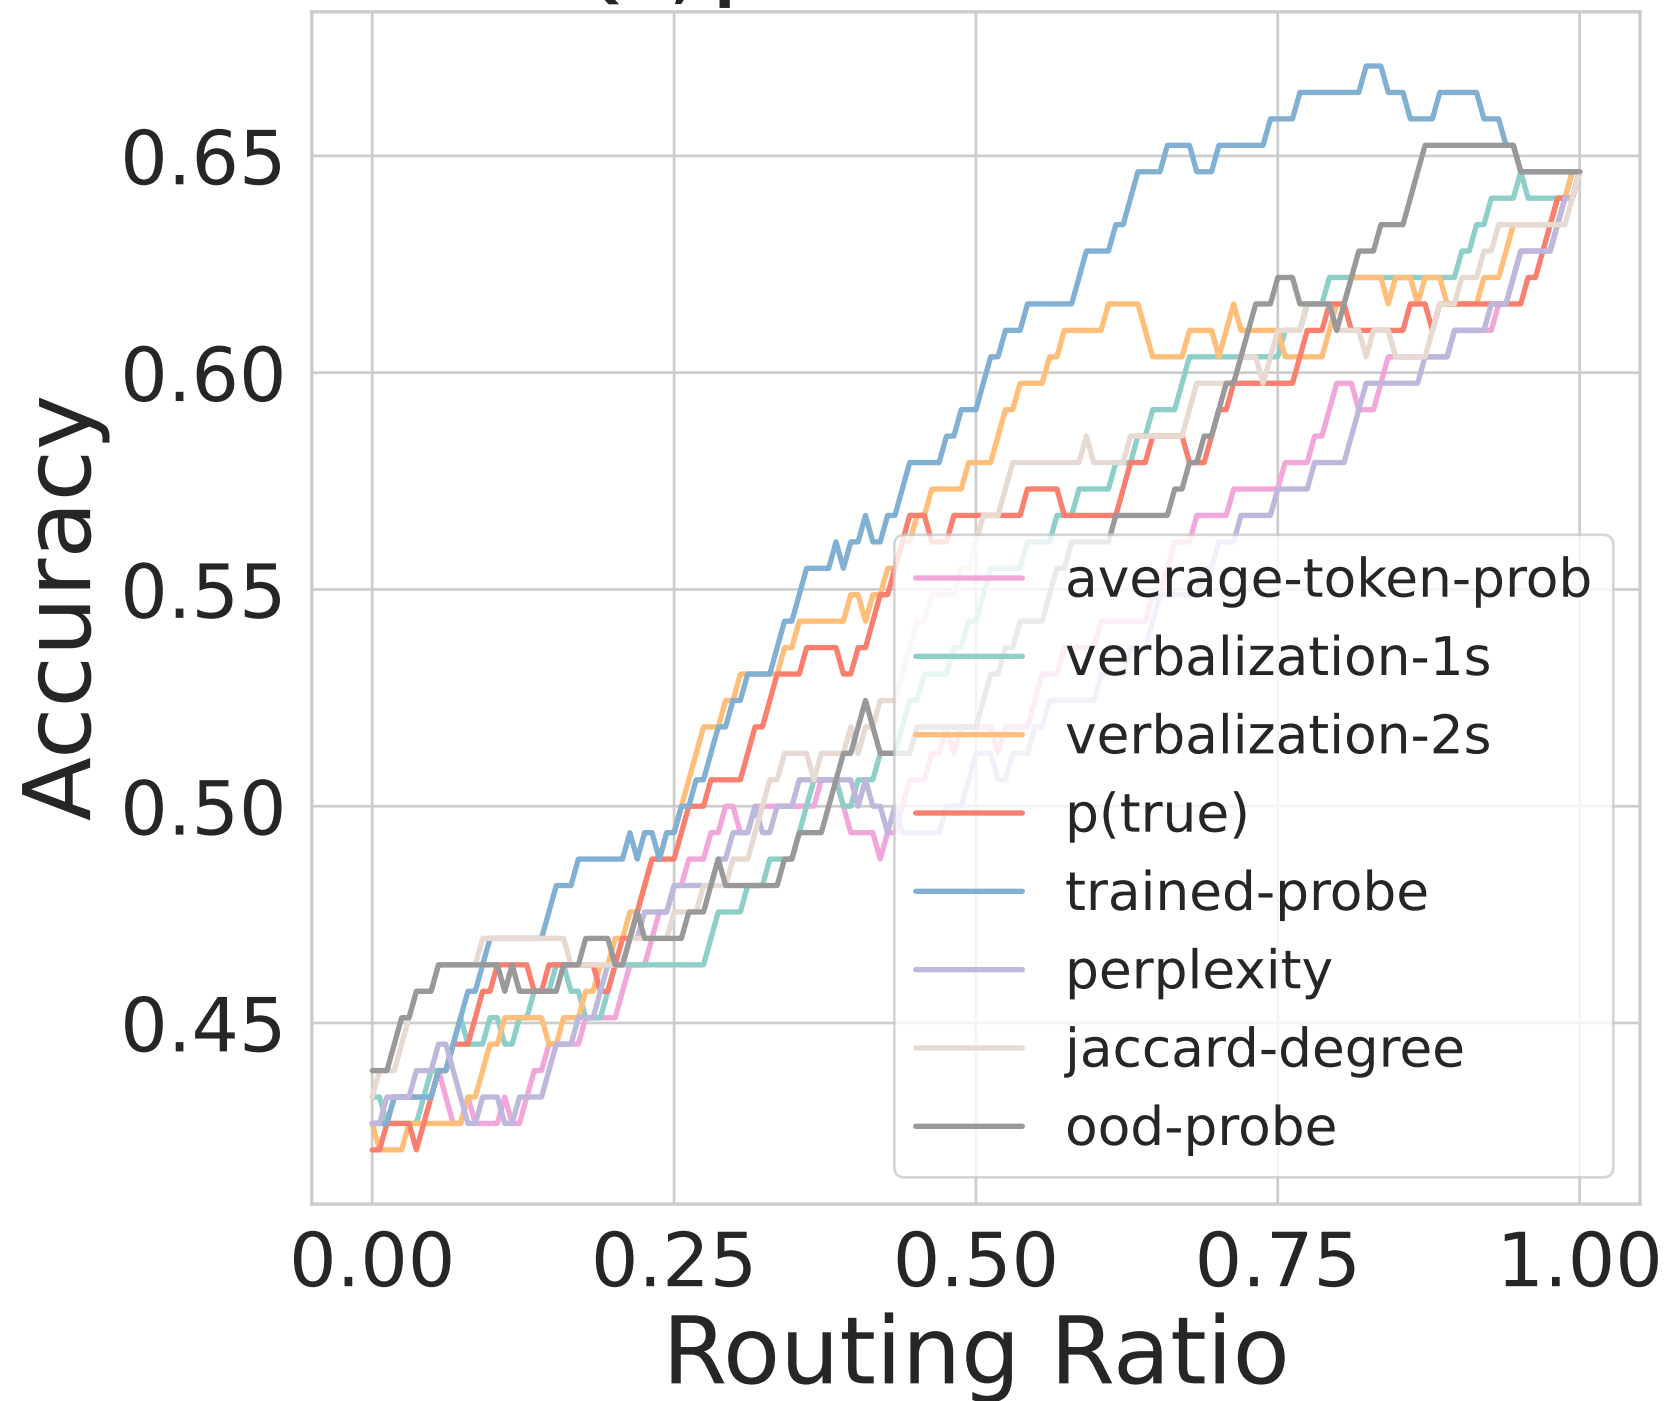

Supplement: supplementary_material [file rr_acc_truthful_qa_phi-3.5-mini_gpt41.pdf › Routing_SLM_LLMs/Uncertainty-based Routing/w_legend/to_gpt41/rr_acc_truthful_qa_phi-3.5-mini_gpt41.pdf]

# TruthfulQA, phi-4-mini-reasoning to GPT-4.1 mini

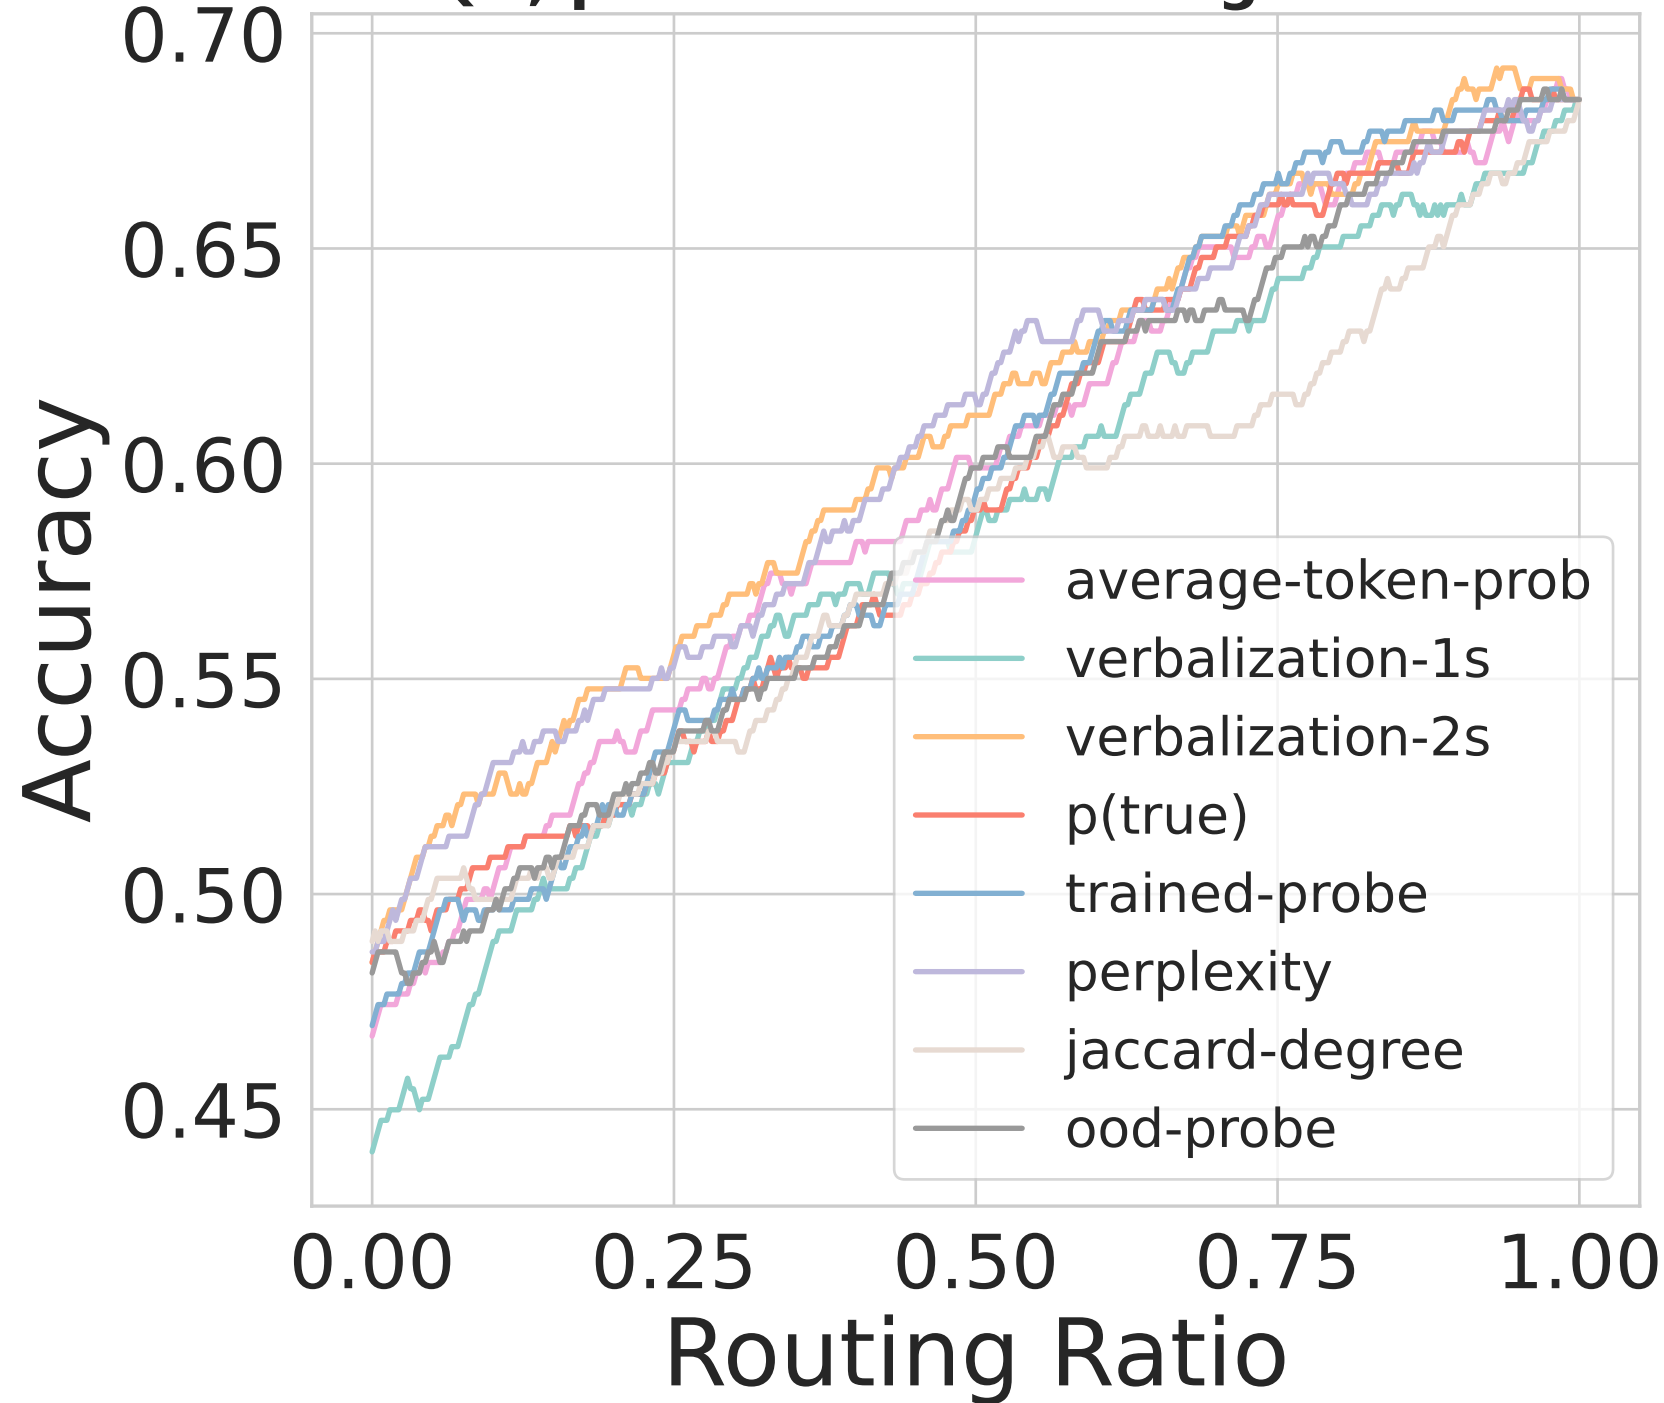

Supplement: supplementary_material [file rr_acc_truthful_qa_phi-4-mini-reasoning_gpt41.pdf › Routing_SLM_LLMs/Uncertainty-based Routing/w_legend/to_gpt41/rr_acc_truthful_qa_phi-4-mini-reasoning_gpt41.pdf]

TruthfulQA, qwen-2.5-7b to GPT-4.1 mini

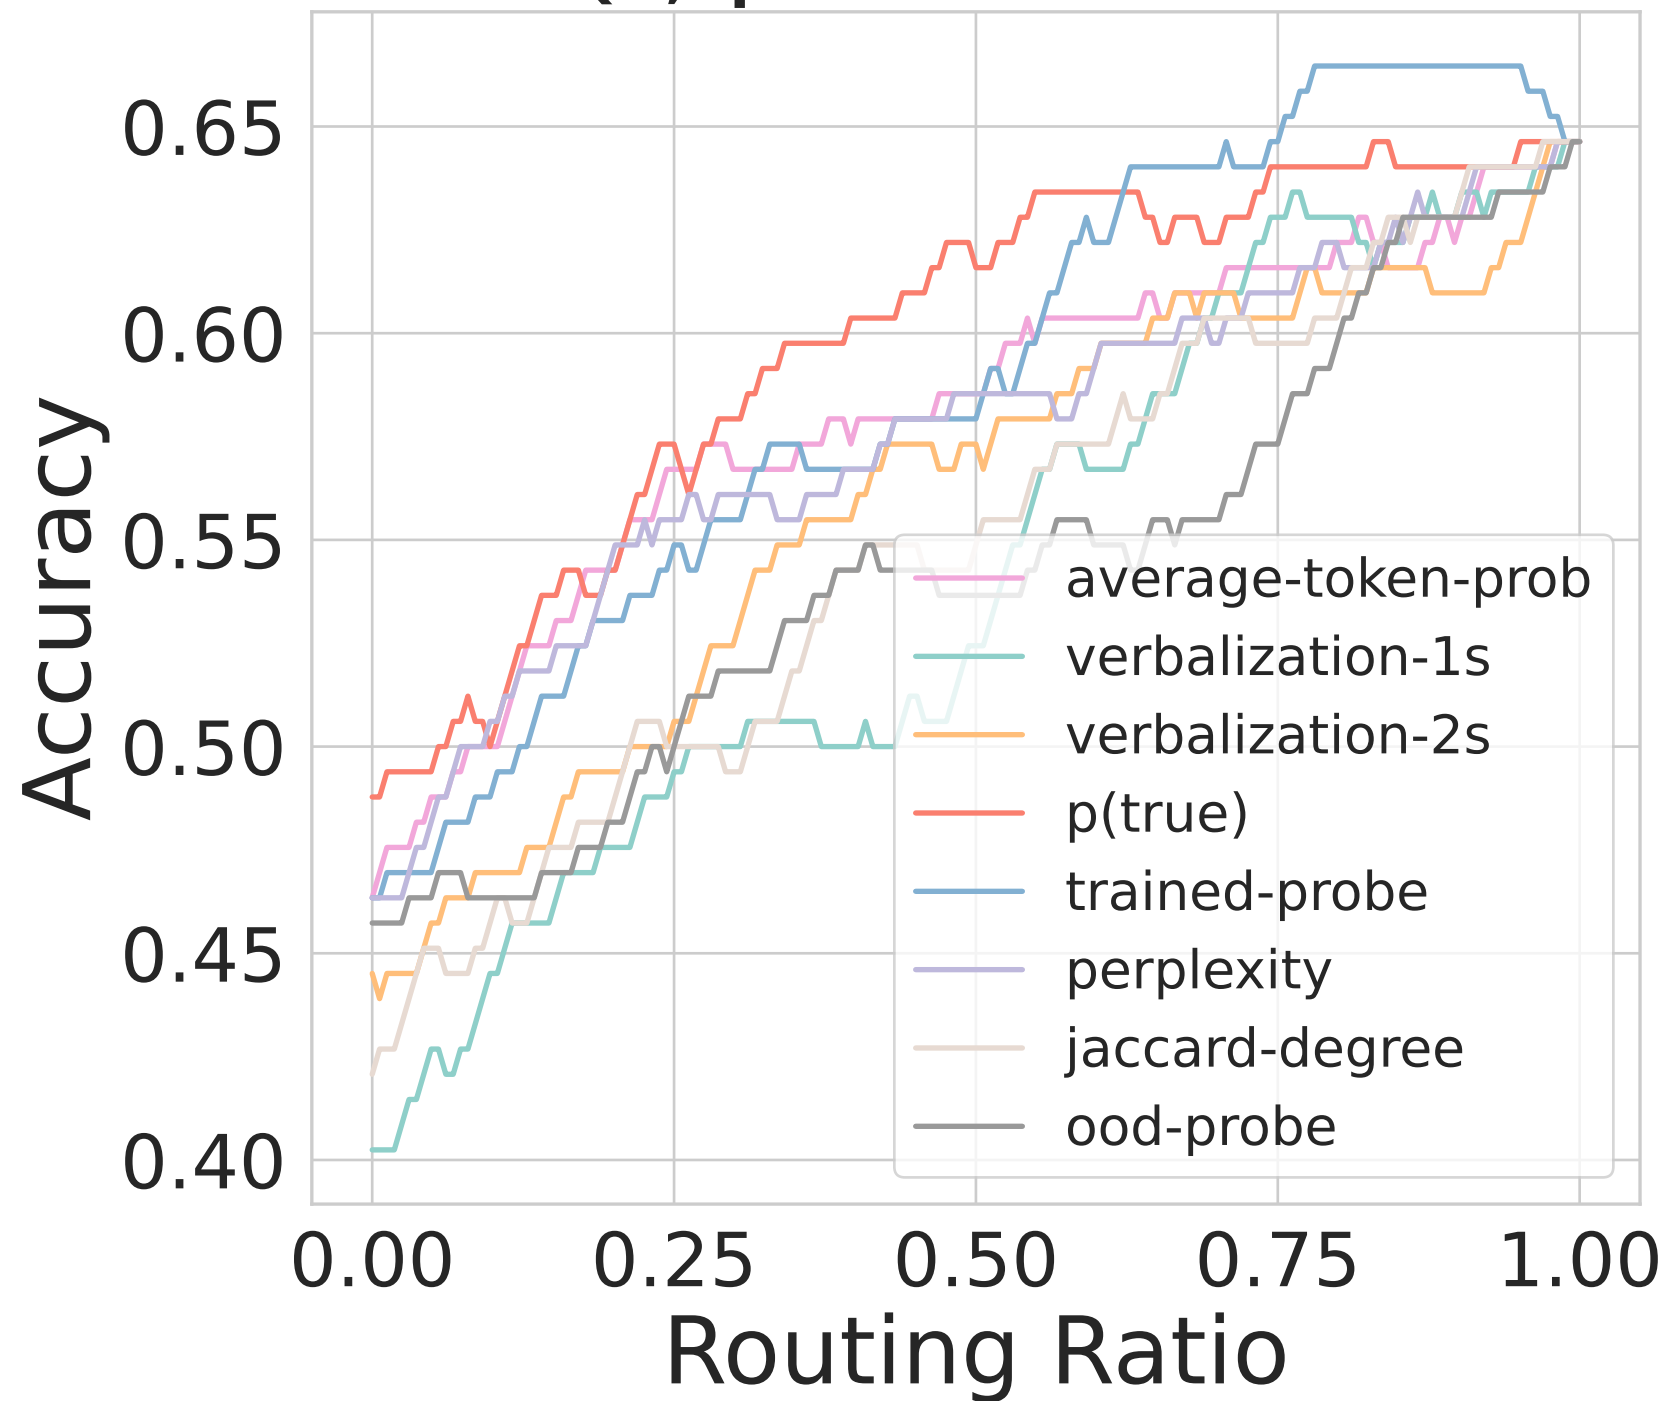

Supplement: supplementary_material [file rr_acc_truthful_qa_qwen-2.5-7b_gpt41.pdf › Routing_SLM_LLMs/Uncertainty-based Routing/w_legend/to_gpt41/rr_acc_truthful_qa_qwen-2.5-7b_gpt41.pdf]

## TruthfulQA, rwkv to GPT-4.1 mini

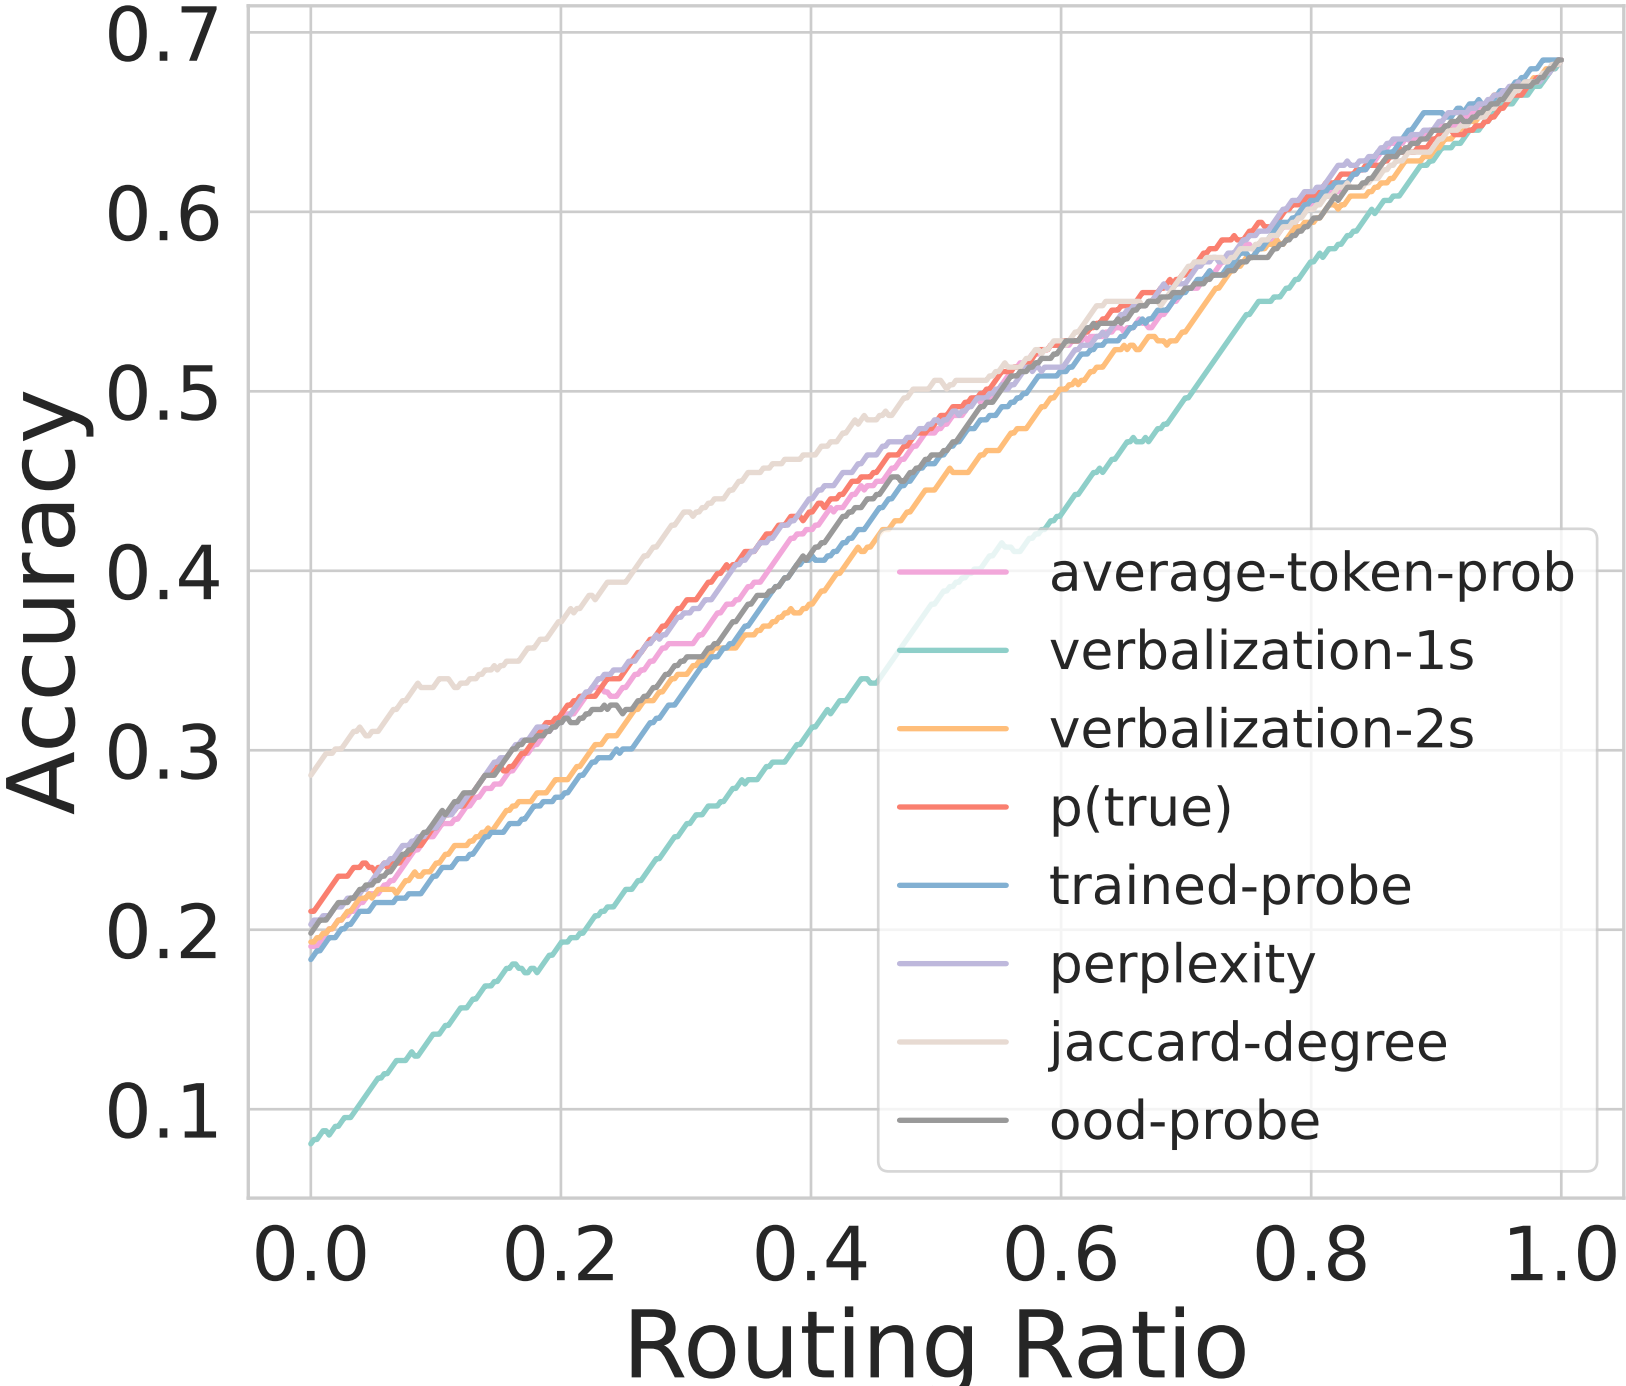

Supplement: supplementary_material [file rr_acc_truthful_qa_rwkv_gpt41.pdf › Routing_SLM_LLMs/Uncertainty-based Routing/w_legend/to_gpt41/rr_acc_truthful_qa_rwkv_gpt41.pdf]

# WinoGrande, Qwen3-0.6B to GPT-4.1 mini

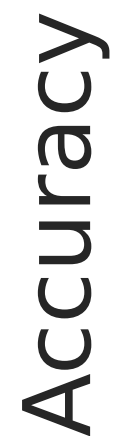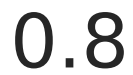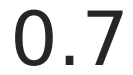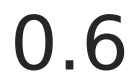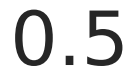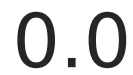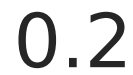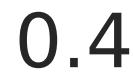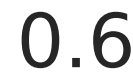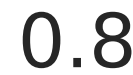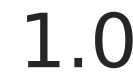

# Routing Ratio

Supplement: supplementary_material [file rr_acc_winogrande_Qwen3-0.6B_gpt41.pdf › Routing_SLM_LLMs/Uncertainty-based Routing/w_legend/to_gpt41/rr_acc_winogrande_Qwen3-0.6B_gpt41.pdf]

# WinoGrande, Qwen3-1.7B to GPT-4.1 mini

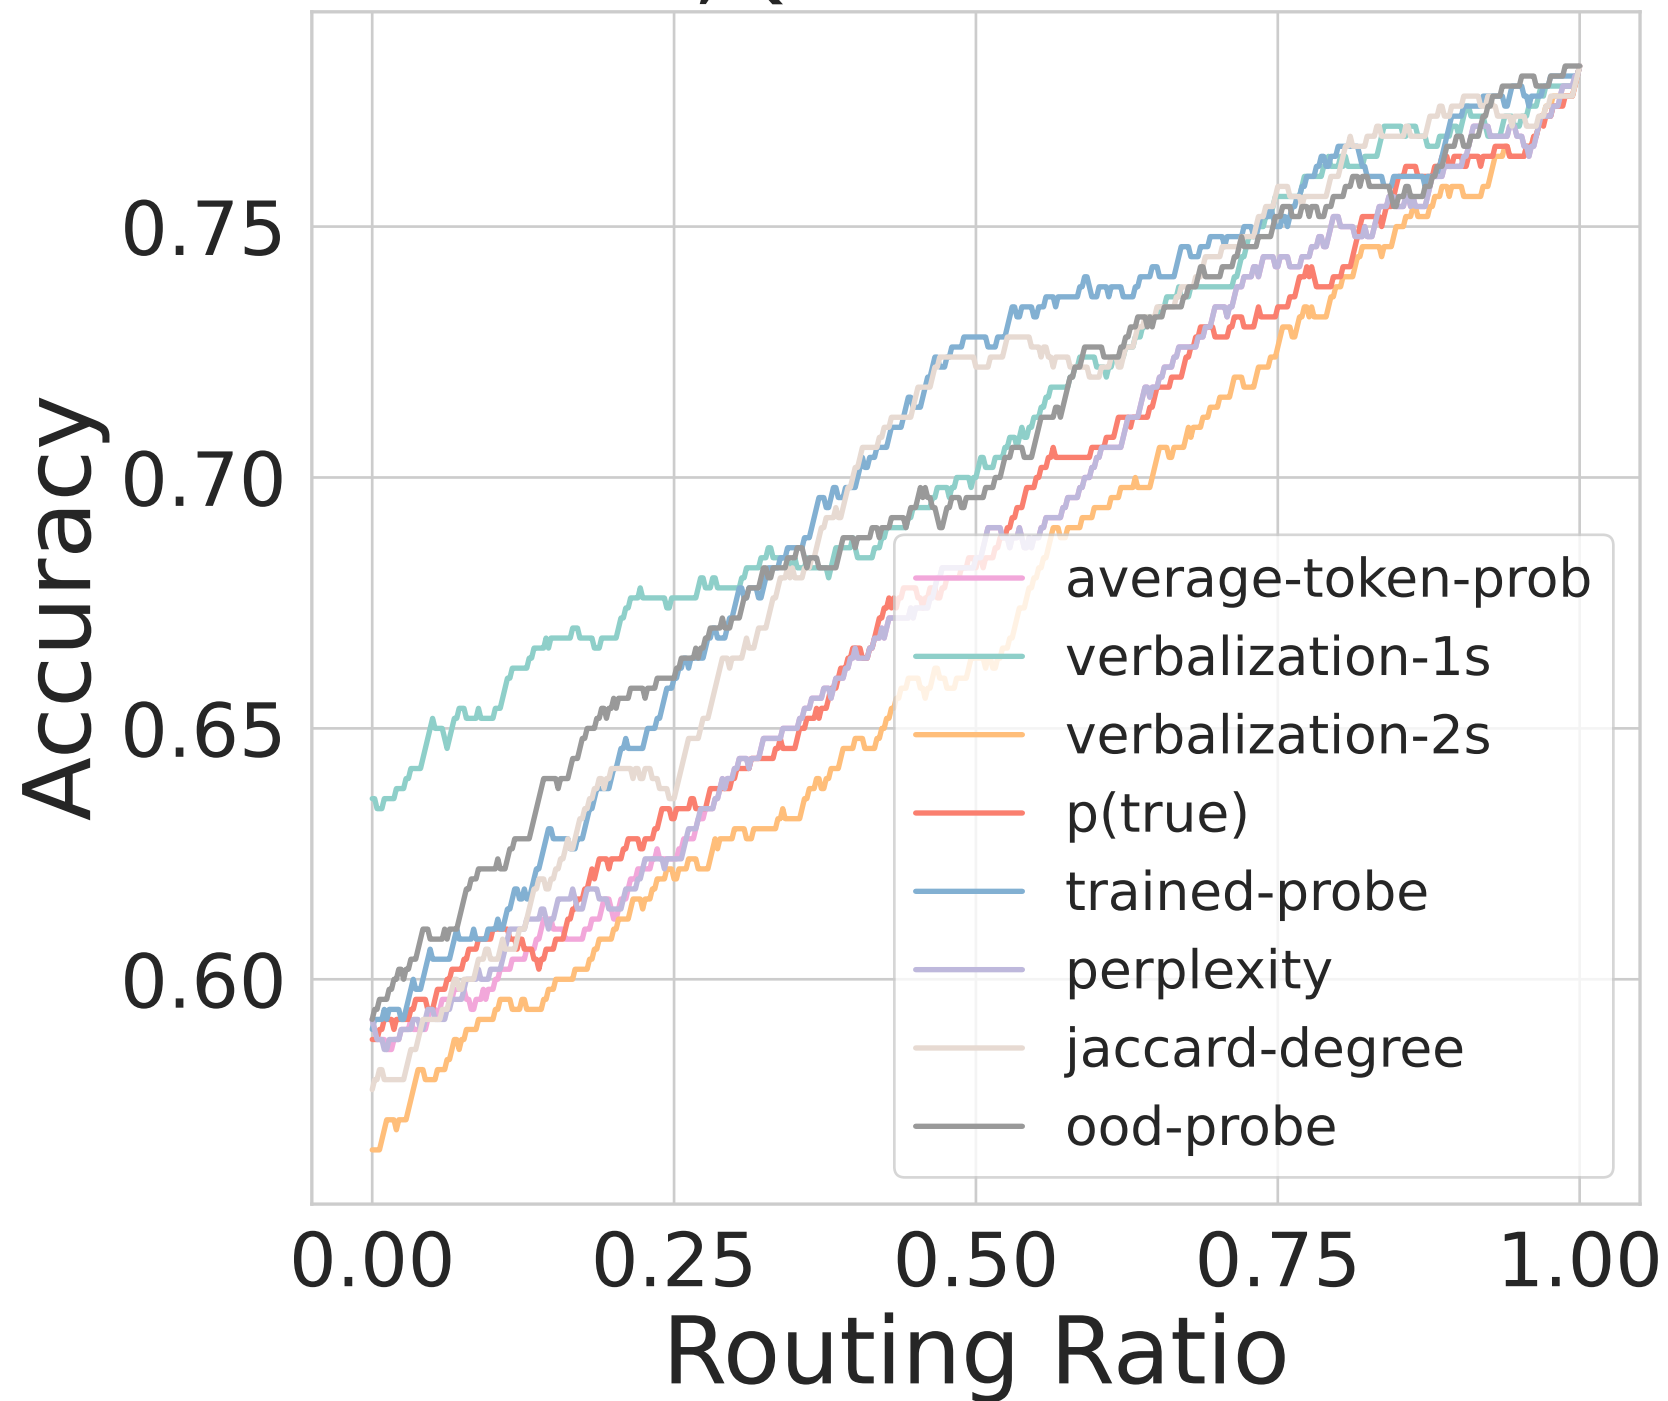

Supplement: supplementary_material [file rr_acc_winogrande_Qwen3-1.7B_gpt41.pdf › Routing_SLM_LLMs/Uncertainty-based Routing/w_legend/to_gpt41/rr_acc_winogrande_Qwen3-1.7B_gpt41.pdf]

WinoGrande, Qwen3-4B to GPT-4.1 mini

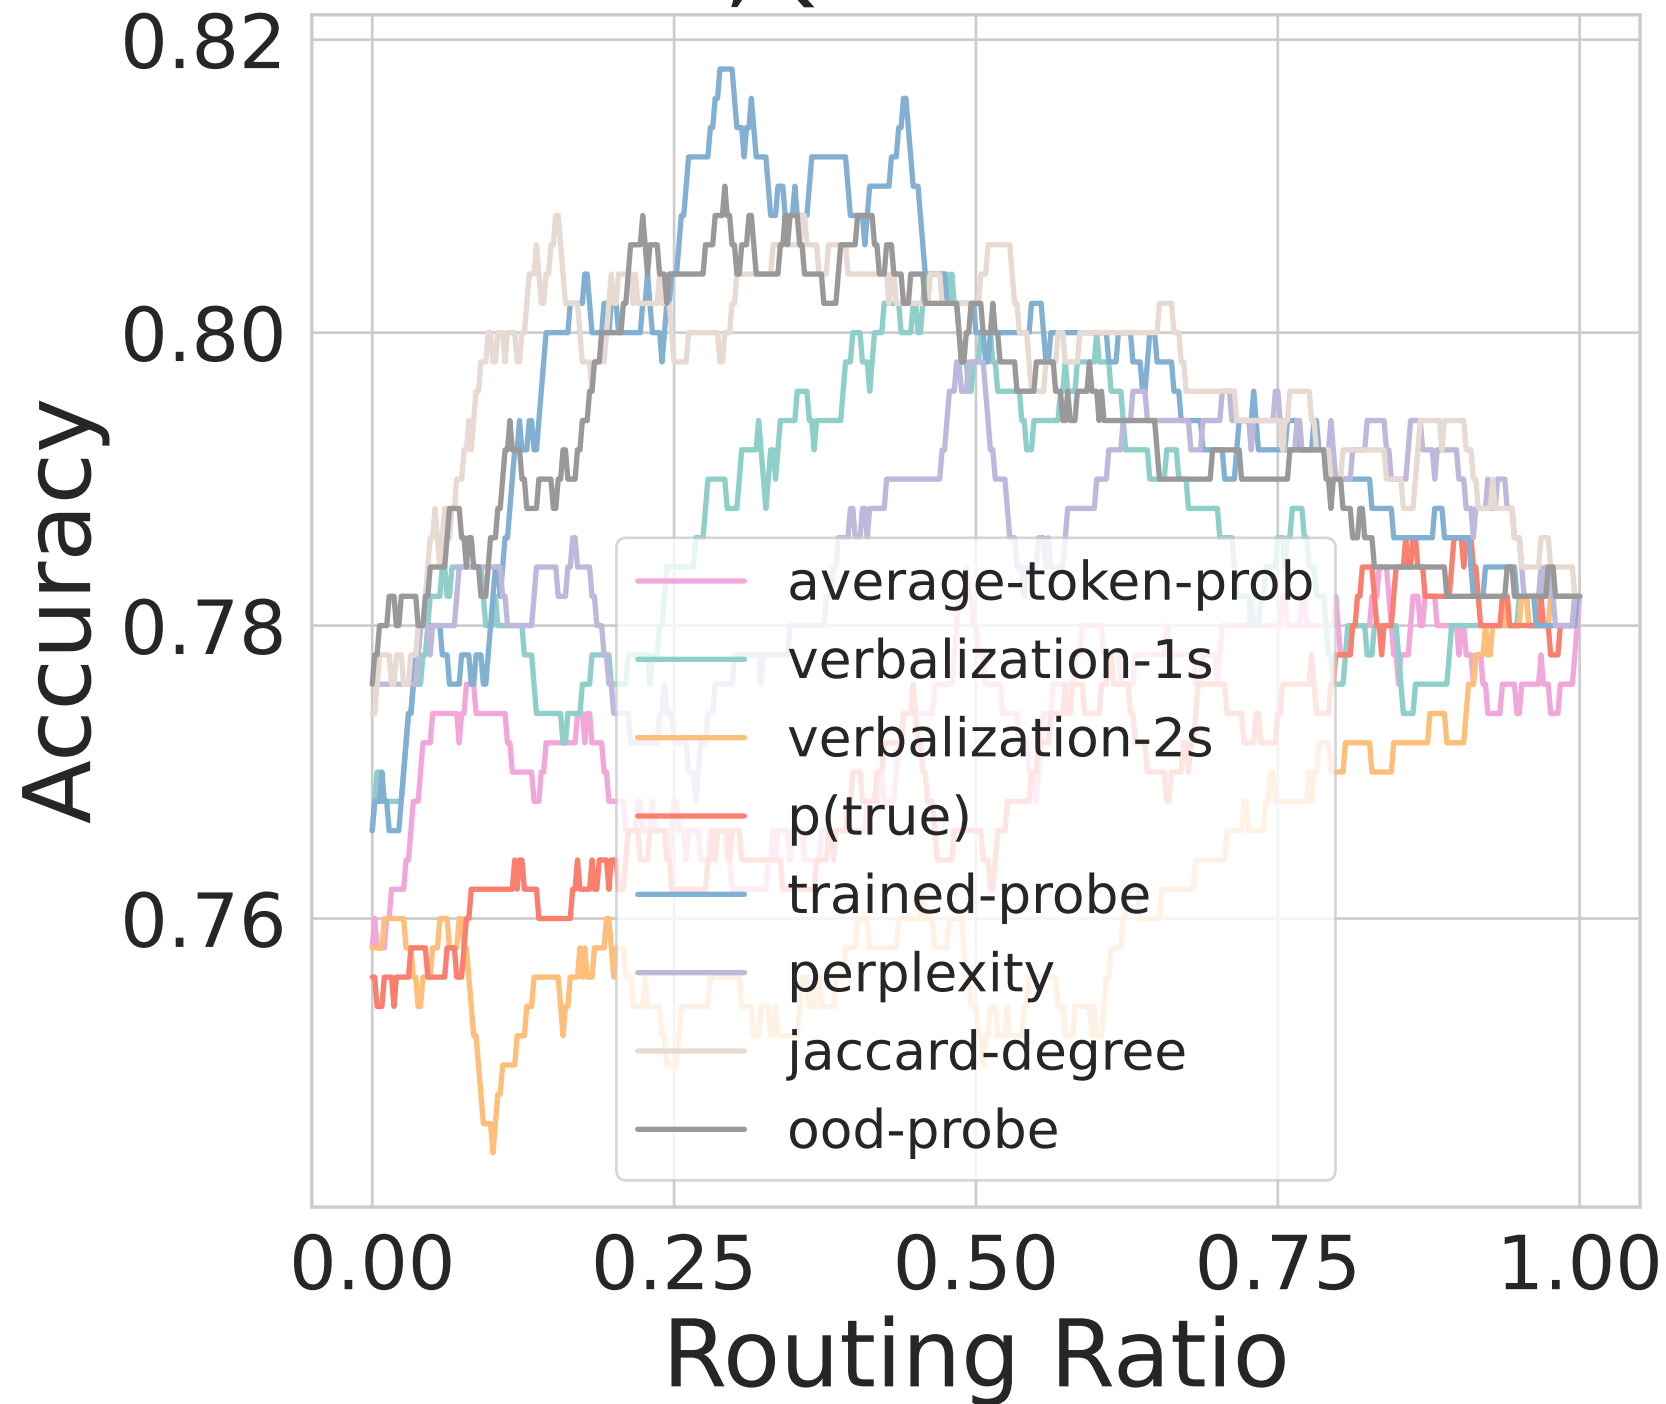

Supplement: supplementary_material [file rr_acc_winogrande_Qwen3-4B_gpt41.pdf › Routing_SLM_LLMs/Uncertainty-based Routing/w_legend/to_gpt41/rr_acc_winogrande_Qwen3-4B_gpt41.pdf]

# WinoGrande, granite-3.1-8b to GPT-4.1 mini

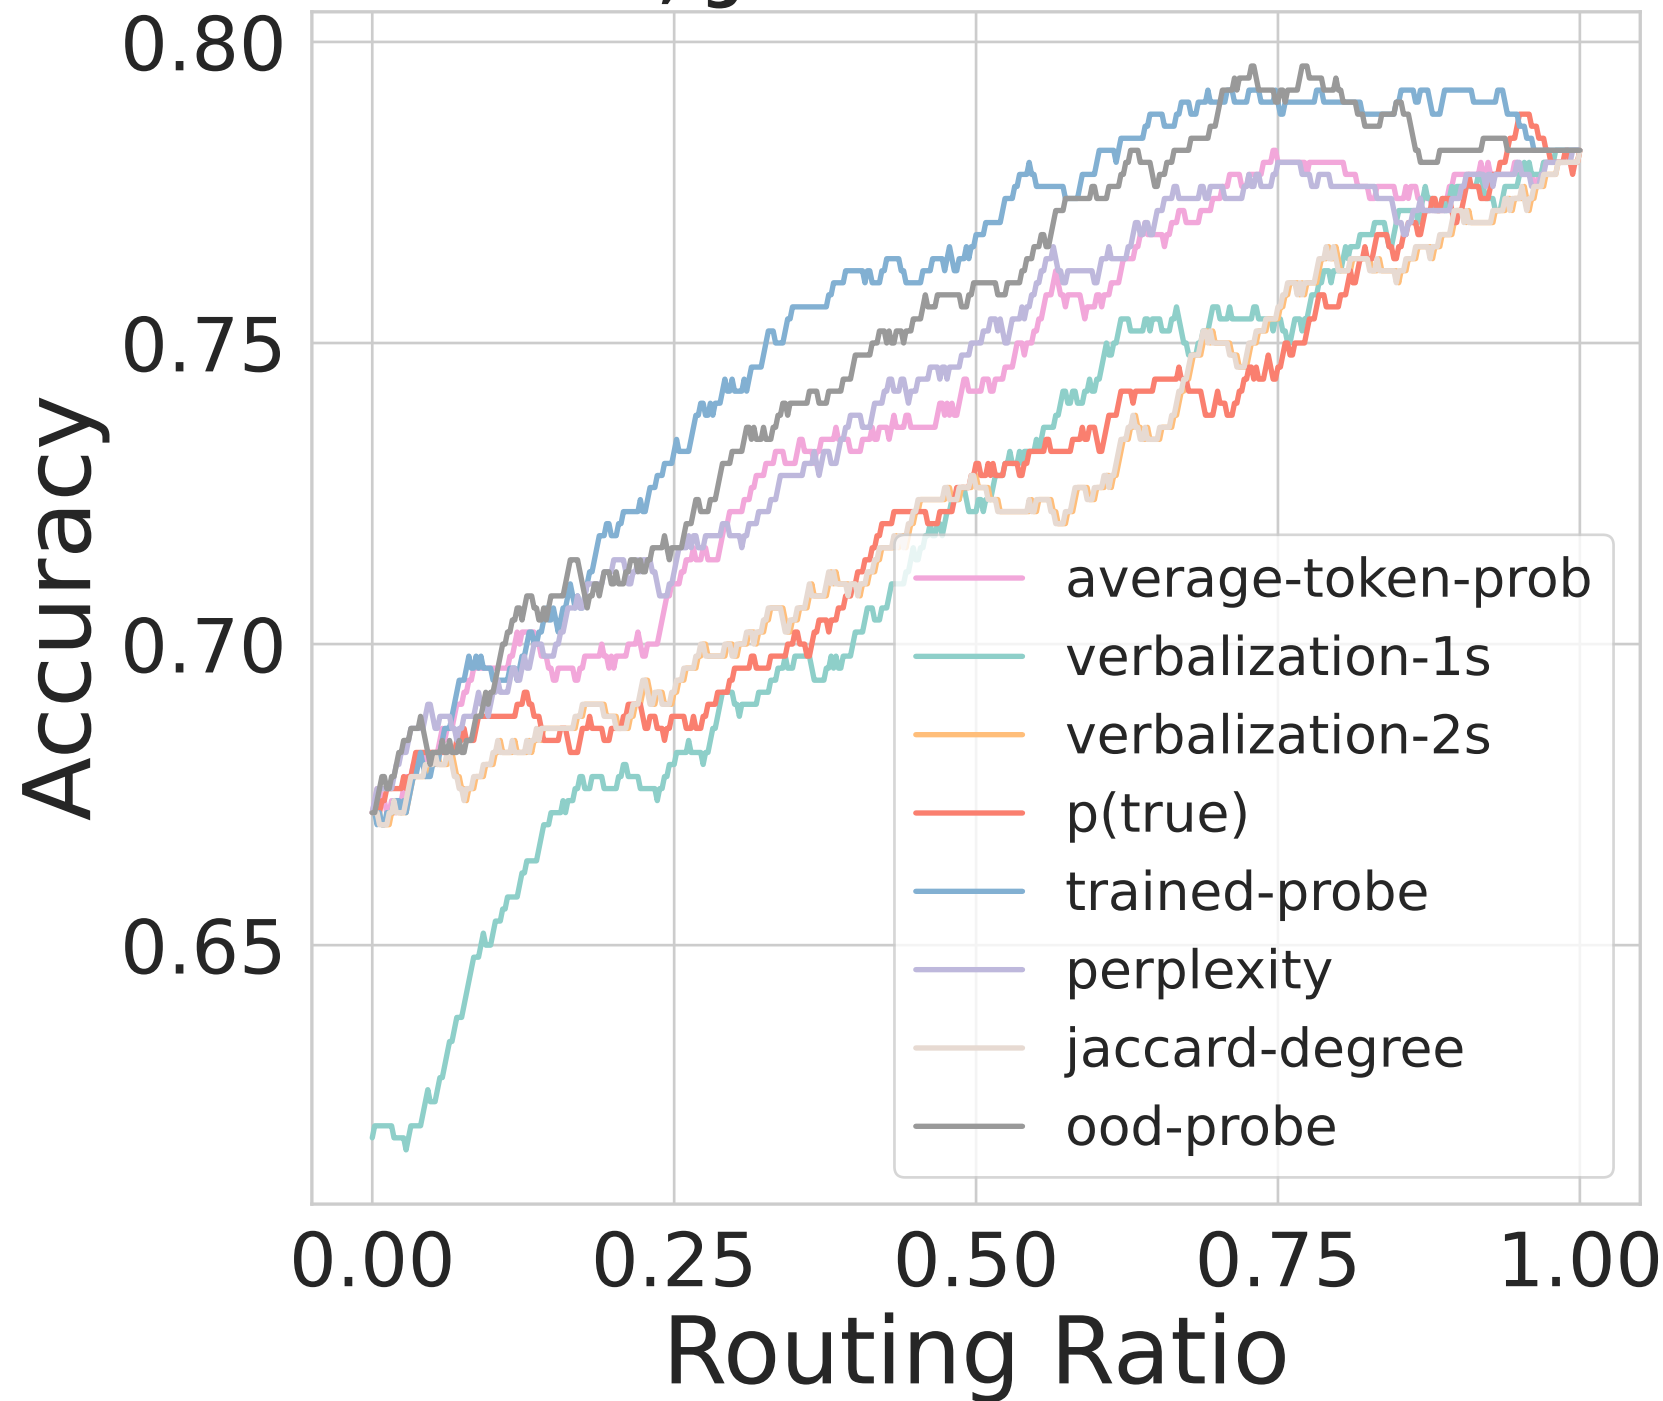

Supplement: supplementary_material [file rr_acc_winogrande_granite-3.1-8b_gpt41.pdf › Routing_SLM_LLMs/Uncertainty-based Routing/w_legend/to_gpt41/rr_acc_winogrande_granite-3.1-8b_gpt41.pdf]

# WinoGrande, llama-3.1-8b to GPT-4.1 mini

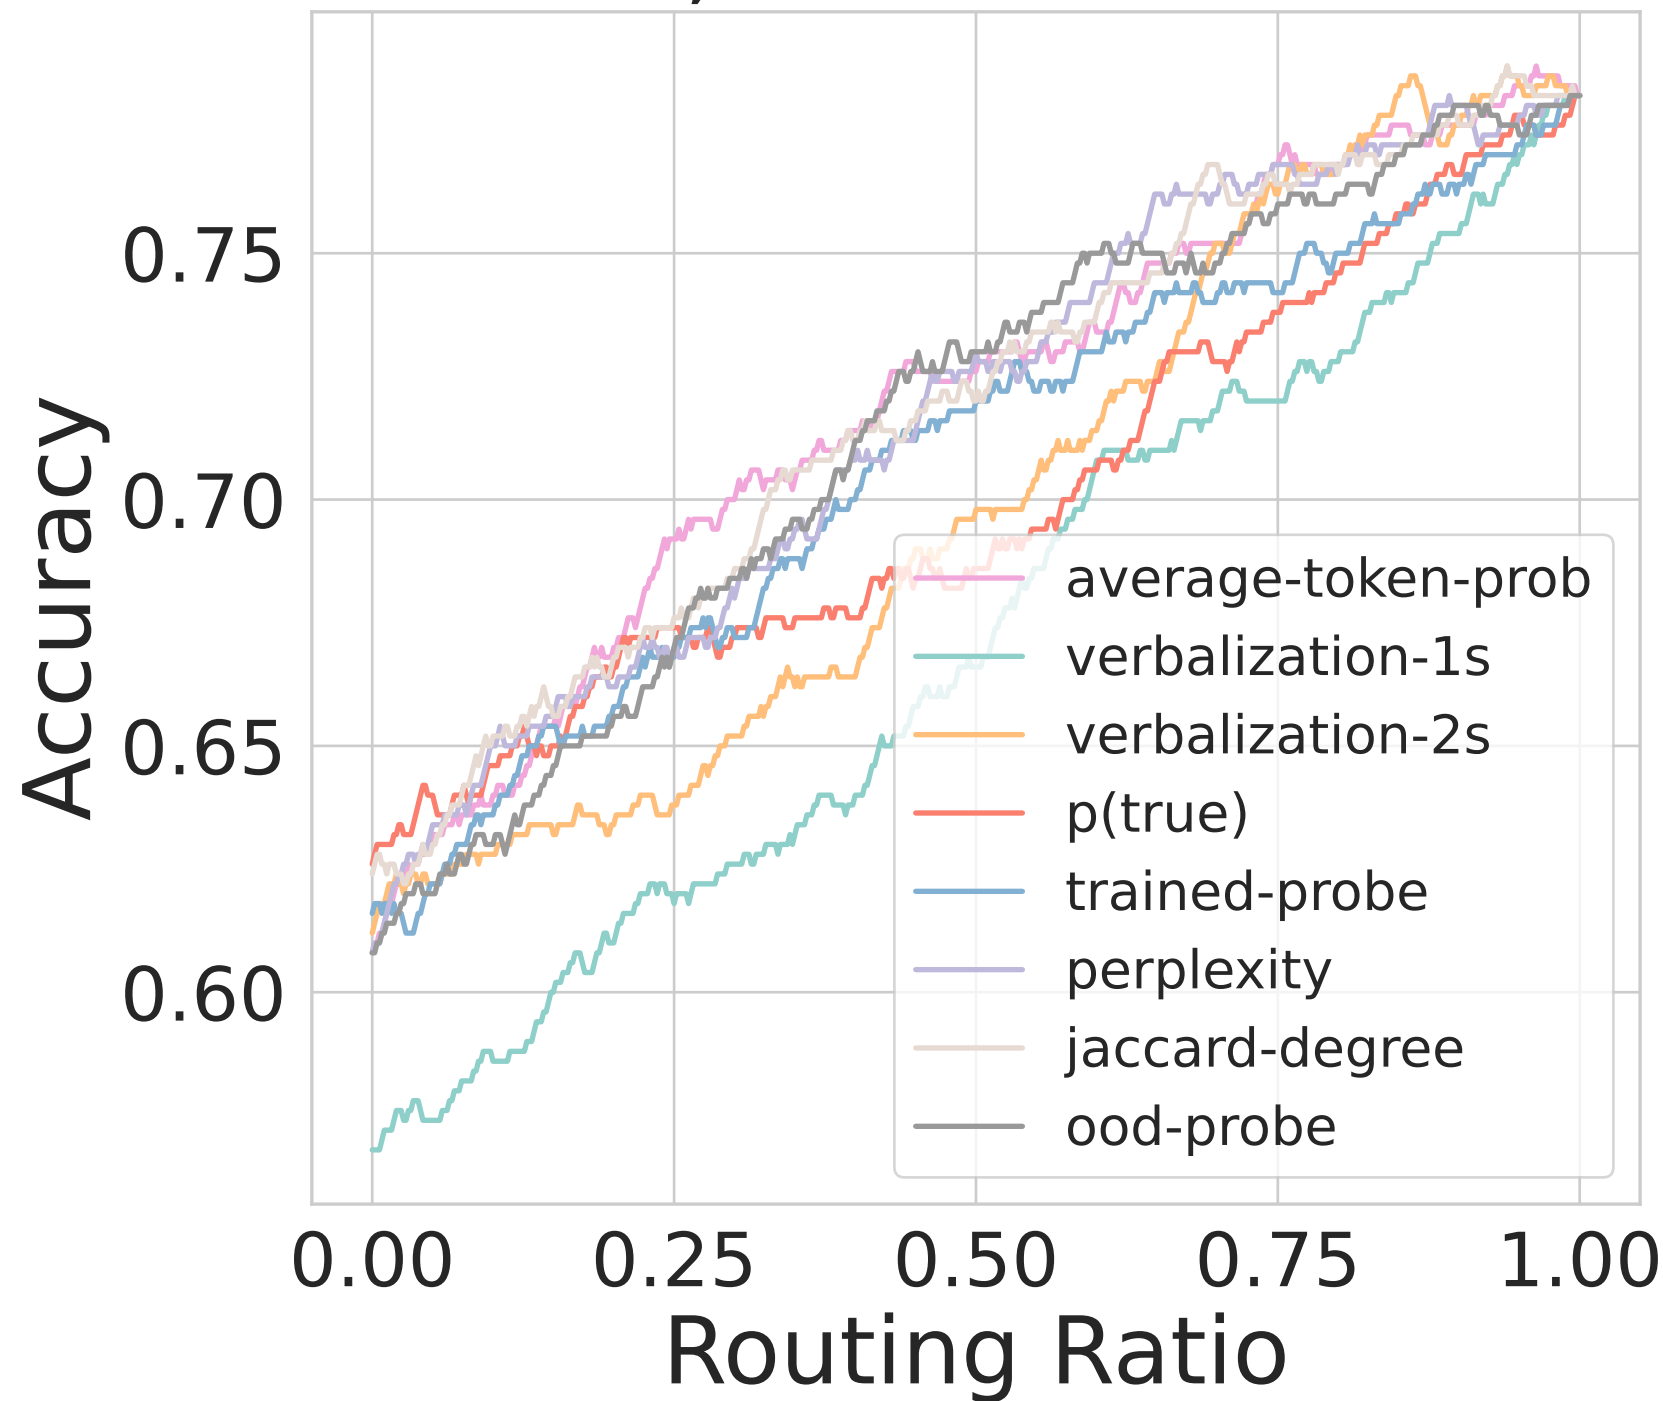

Supplement: supplementary_material [file rr_acc_winogrande_llama-3.1-8b_gpt41.pdf › Routing_SLM_LLMs/Uncertainty-based Routing/w_legend/to_gpt41/rr_acc_winogrande_llama-3.1-8b_gpt41.pdf]

# WinoGrande, llama-3.2-3b to GPT-4.1 mini

Accuracy

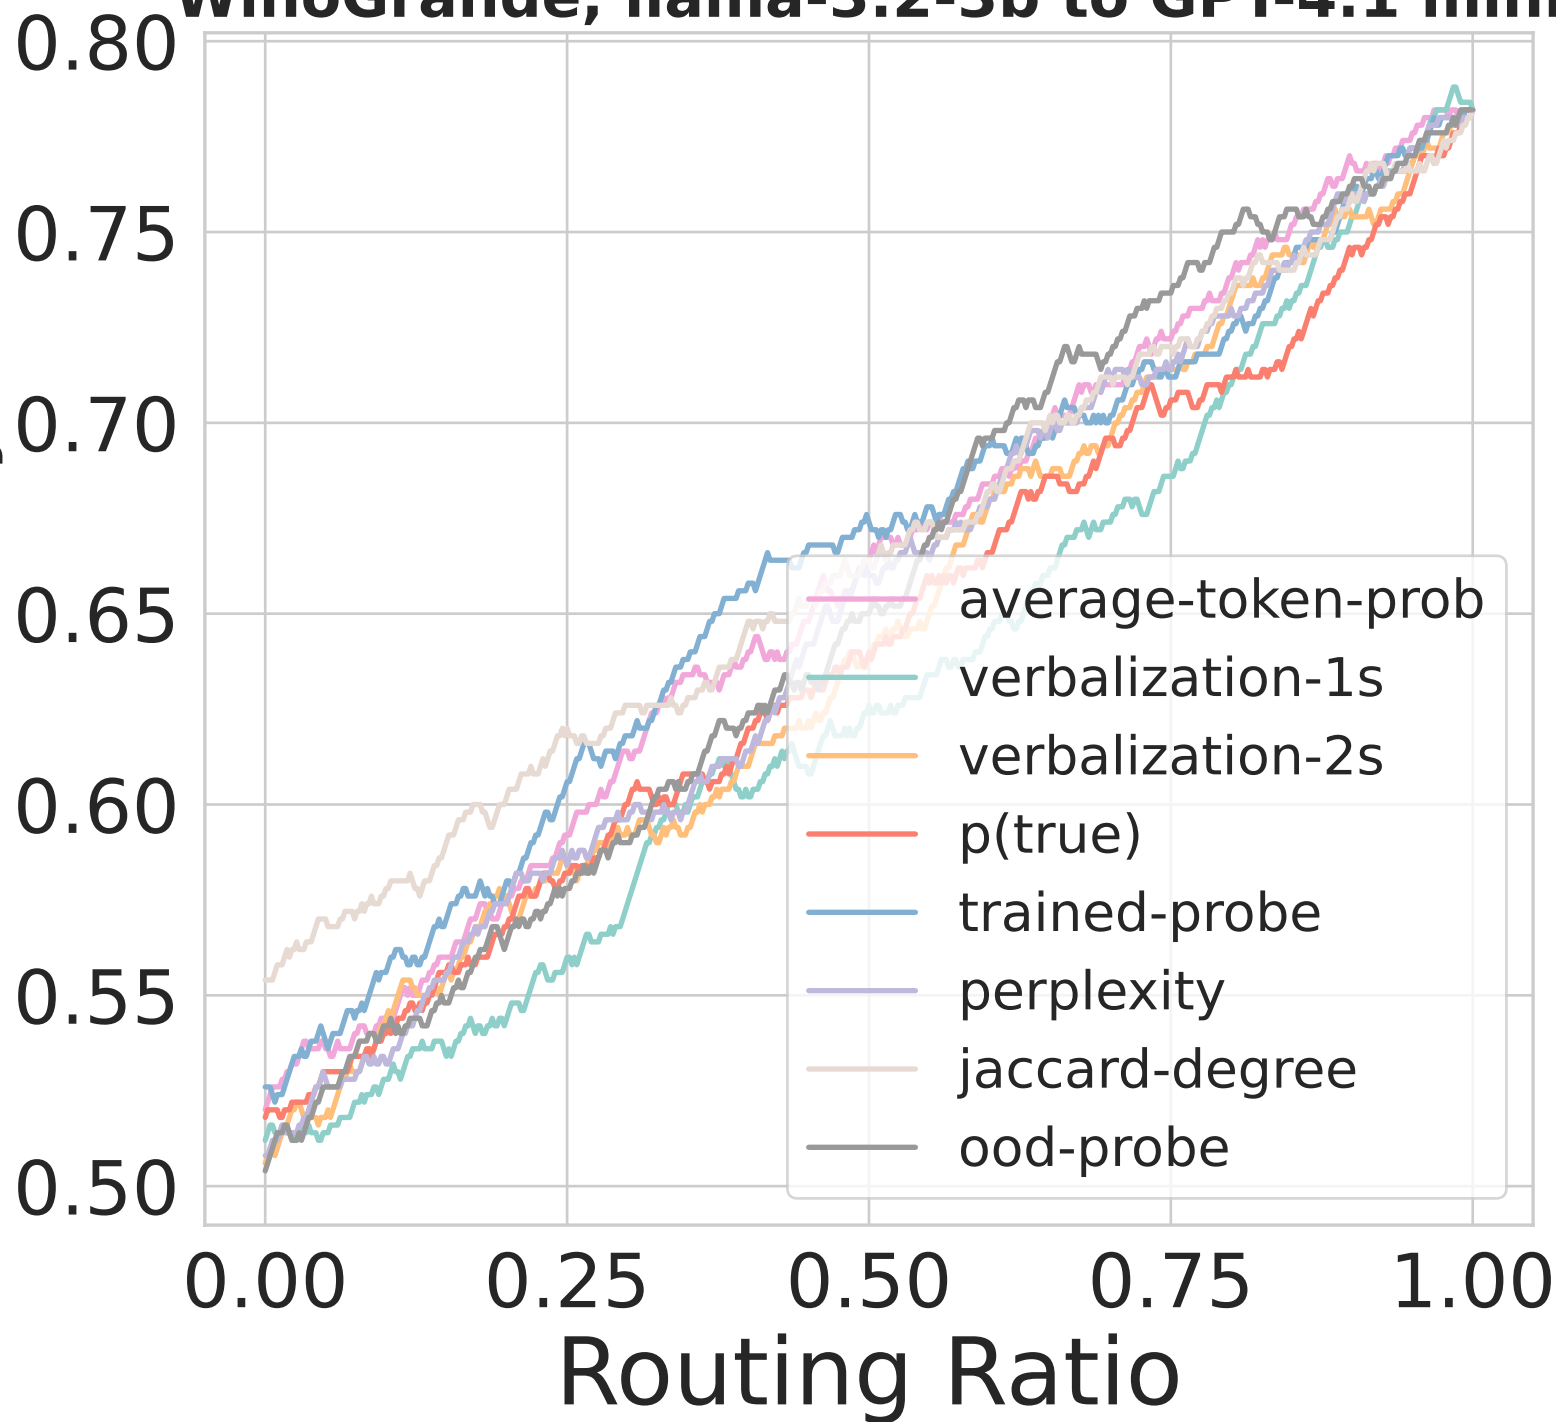

Supplement: supplementary_material [file rr_acc_winogrande_llama-3.2-3b_gpt41.pdf › Routing_SLM_LLMs/Uncertainty-based Routing/w_legend/to_gpt41/rr_acc_winogrande_llama-3.2-3b_gpt41.pdf]

**WinoGrande, mistral-7b to GPT-4.1 mini**

Accuracy

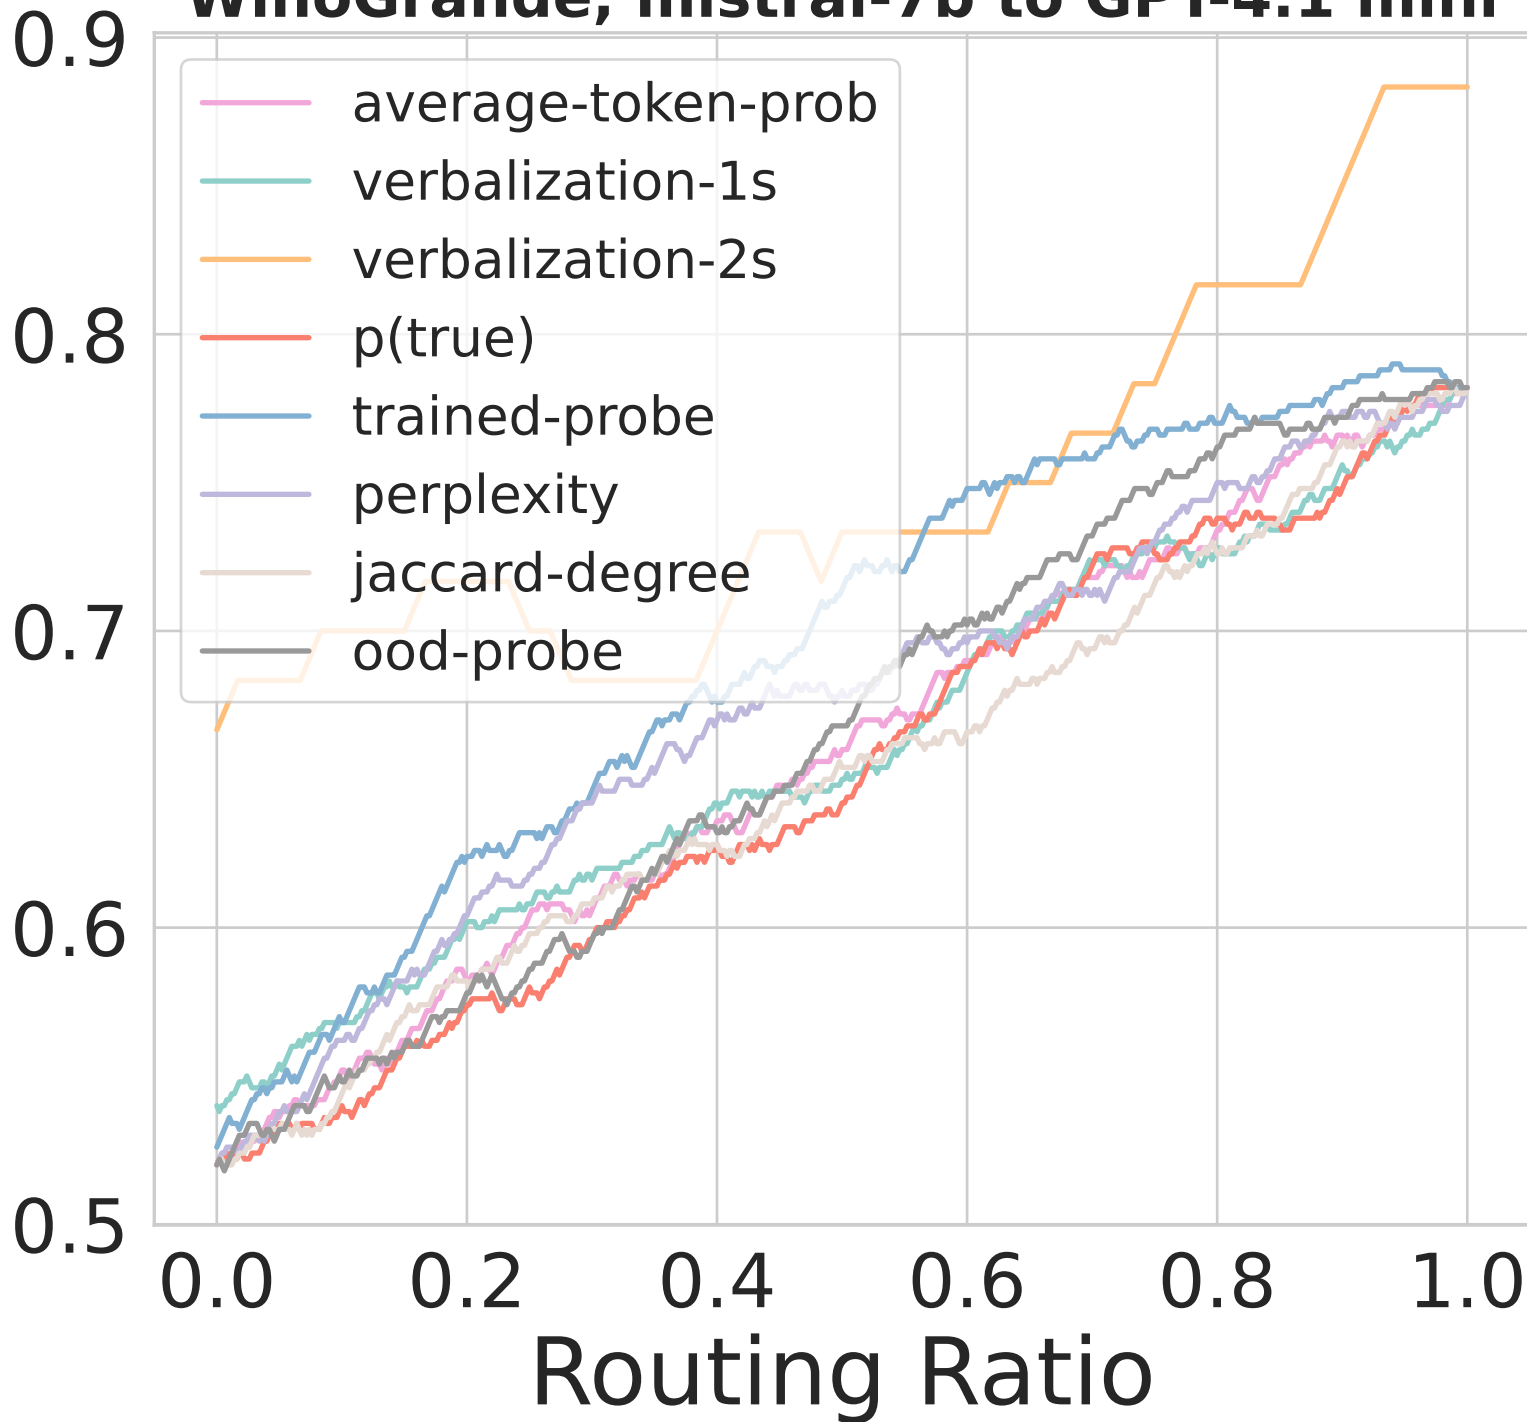

Supplement: supplementary_material [file rr_acc_winogrande_mistral-7b_gpt41.pdf › Routing_SLM_LLMs/Uncertainty-based Routing/w_legend/to_gpt41/rr_acc_winogrande_mistral-7b_gpt41.pdf]

# WinoGrande, phi-3.5-mini to GPT-4.1 mini

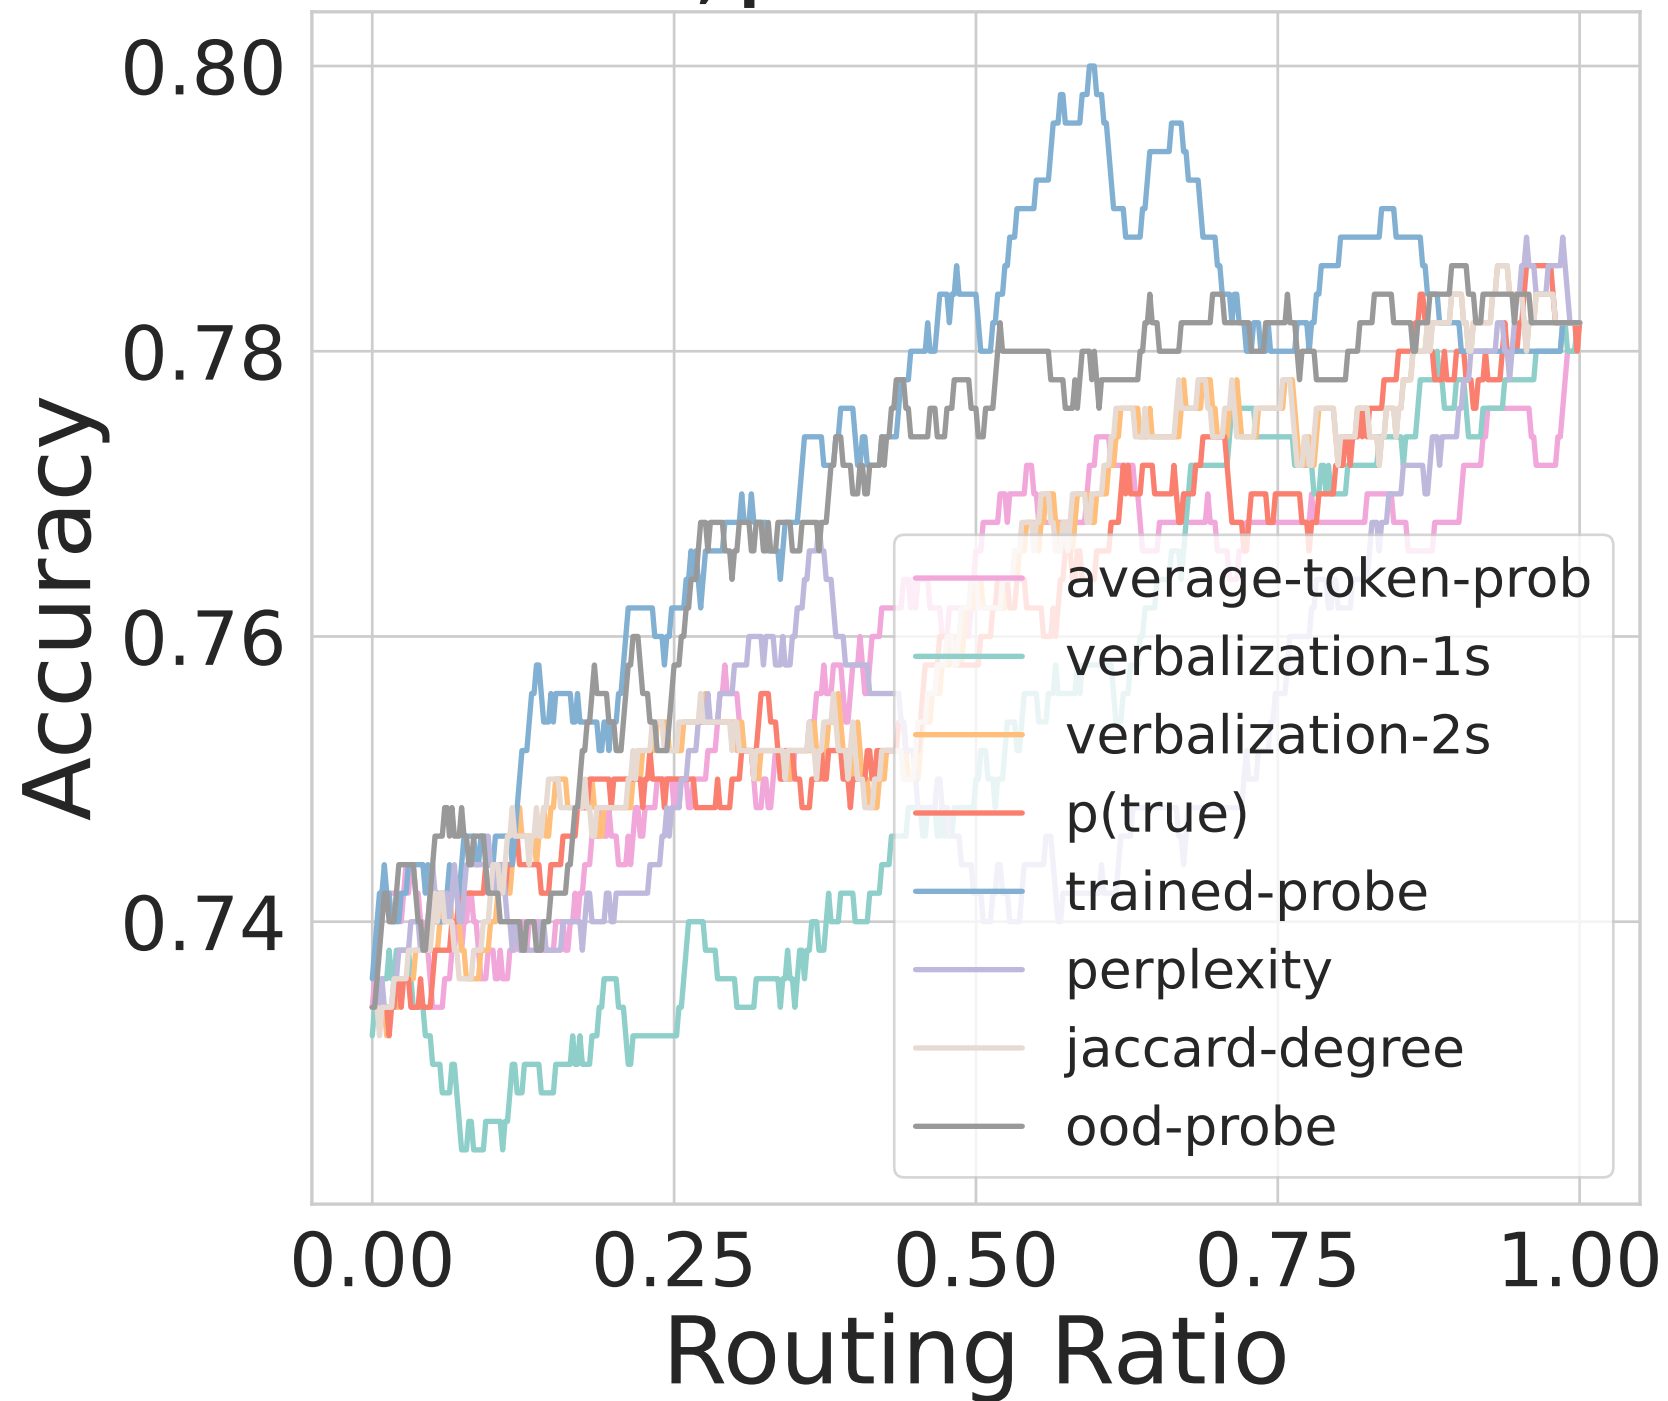

Supplement: supplementary_material [file rr_acc_winogrande_phi-3.5-mini_gpt41.pdf › Routing_SLM_LLMs/Uncertainty-based Routing/w_legend/to_gpt41/rr_acc_winogrande_phi-3.5-mini_gpt41.pdf]

# WinoGrande, phi-4-mini-reasoning to GPT-4.1 mini

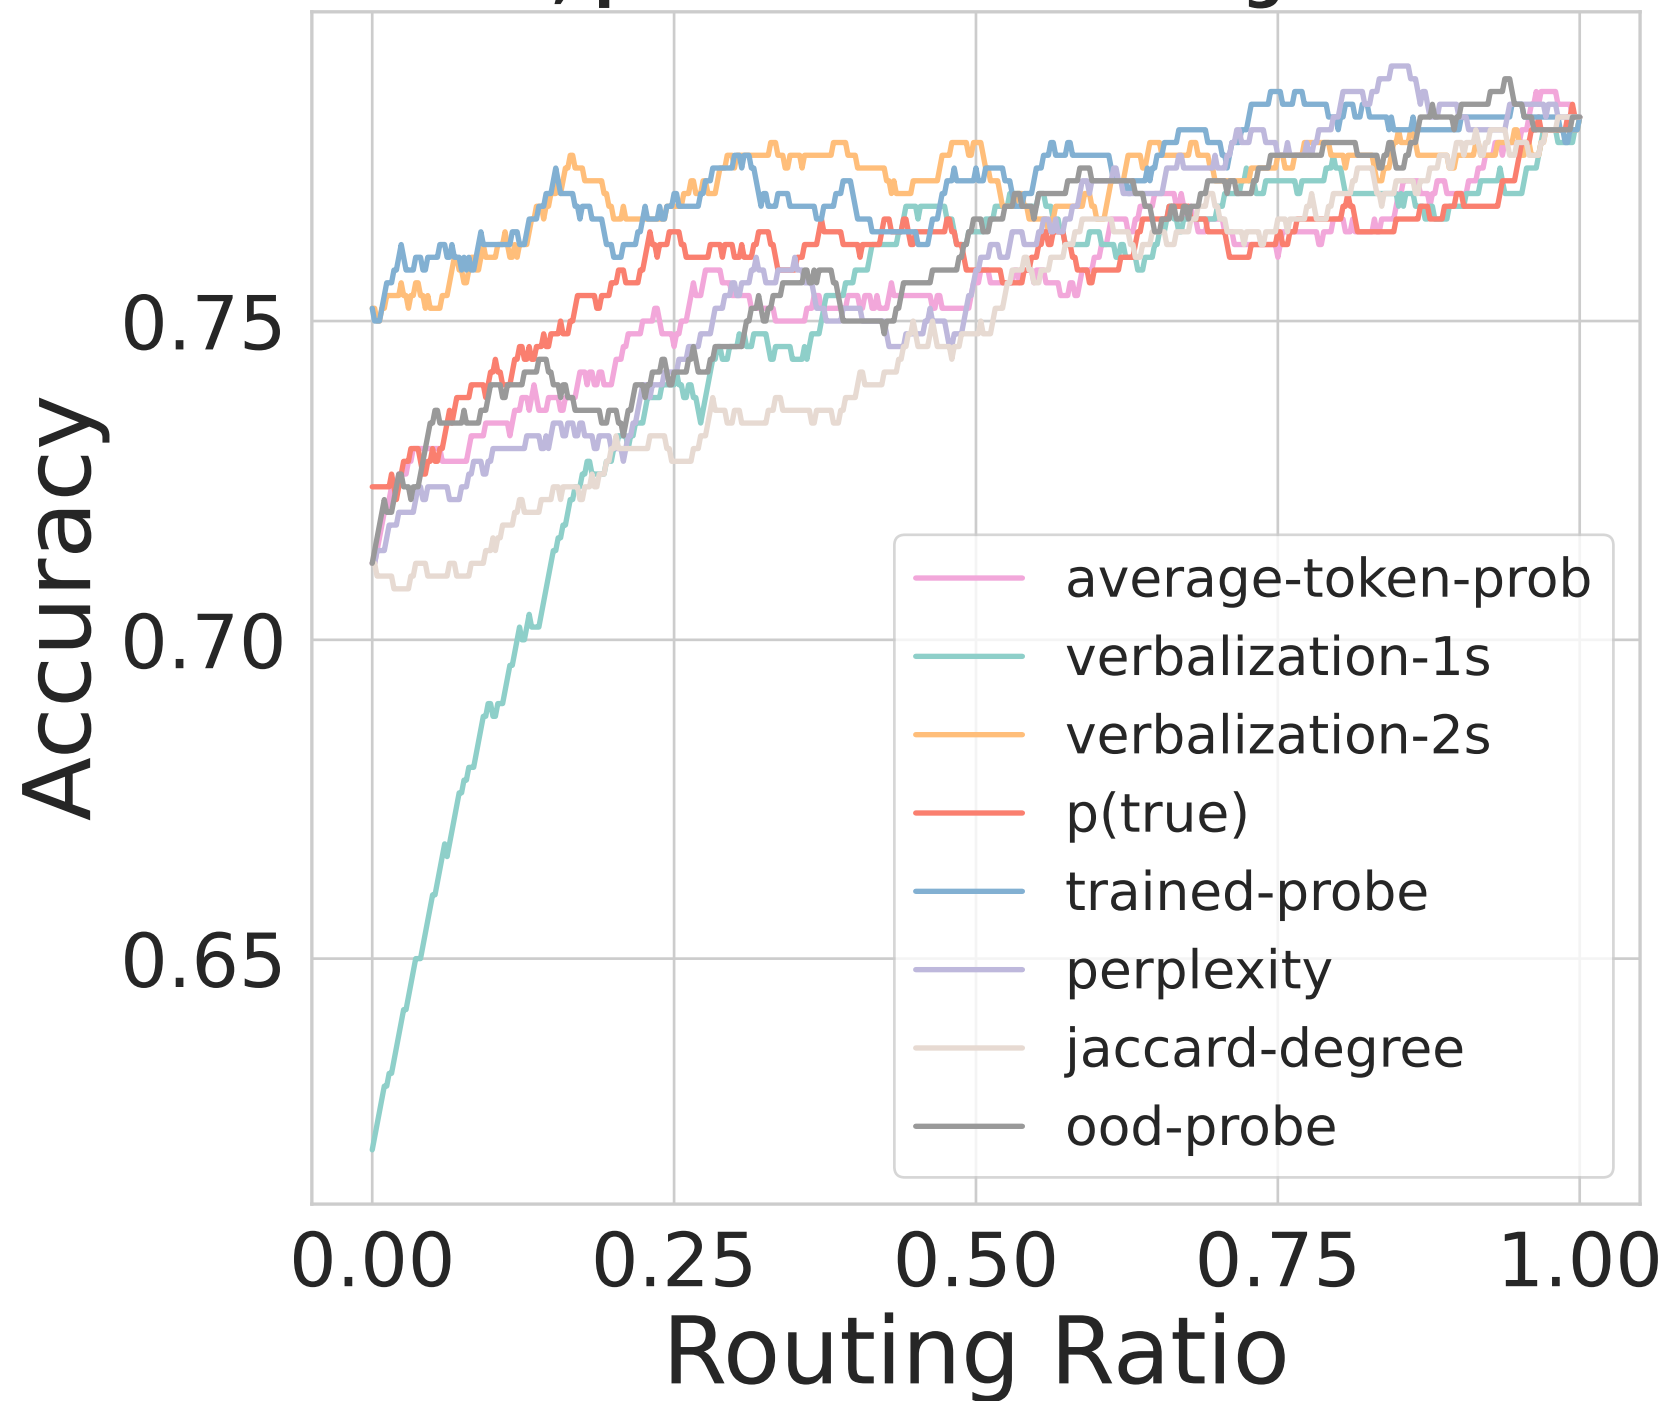

Supplement: supplementary_material [file rr_acc_winogrande_phi-4-mini-reasoning_gpt41.pdf › Routing_SLM_LLMs/Uncertainty-based Routing/w_legend/to_gpt41/rr_acc_winogrande_phi-4-mini-reasoning_gpt41.pdf]

# WinoGrande, qwen-2.5-7b to GPT-4.1 mini

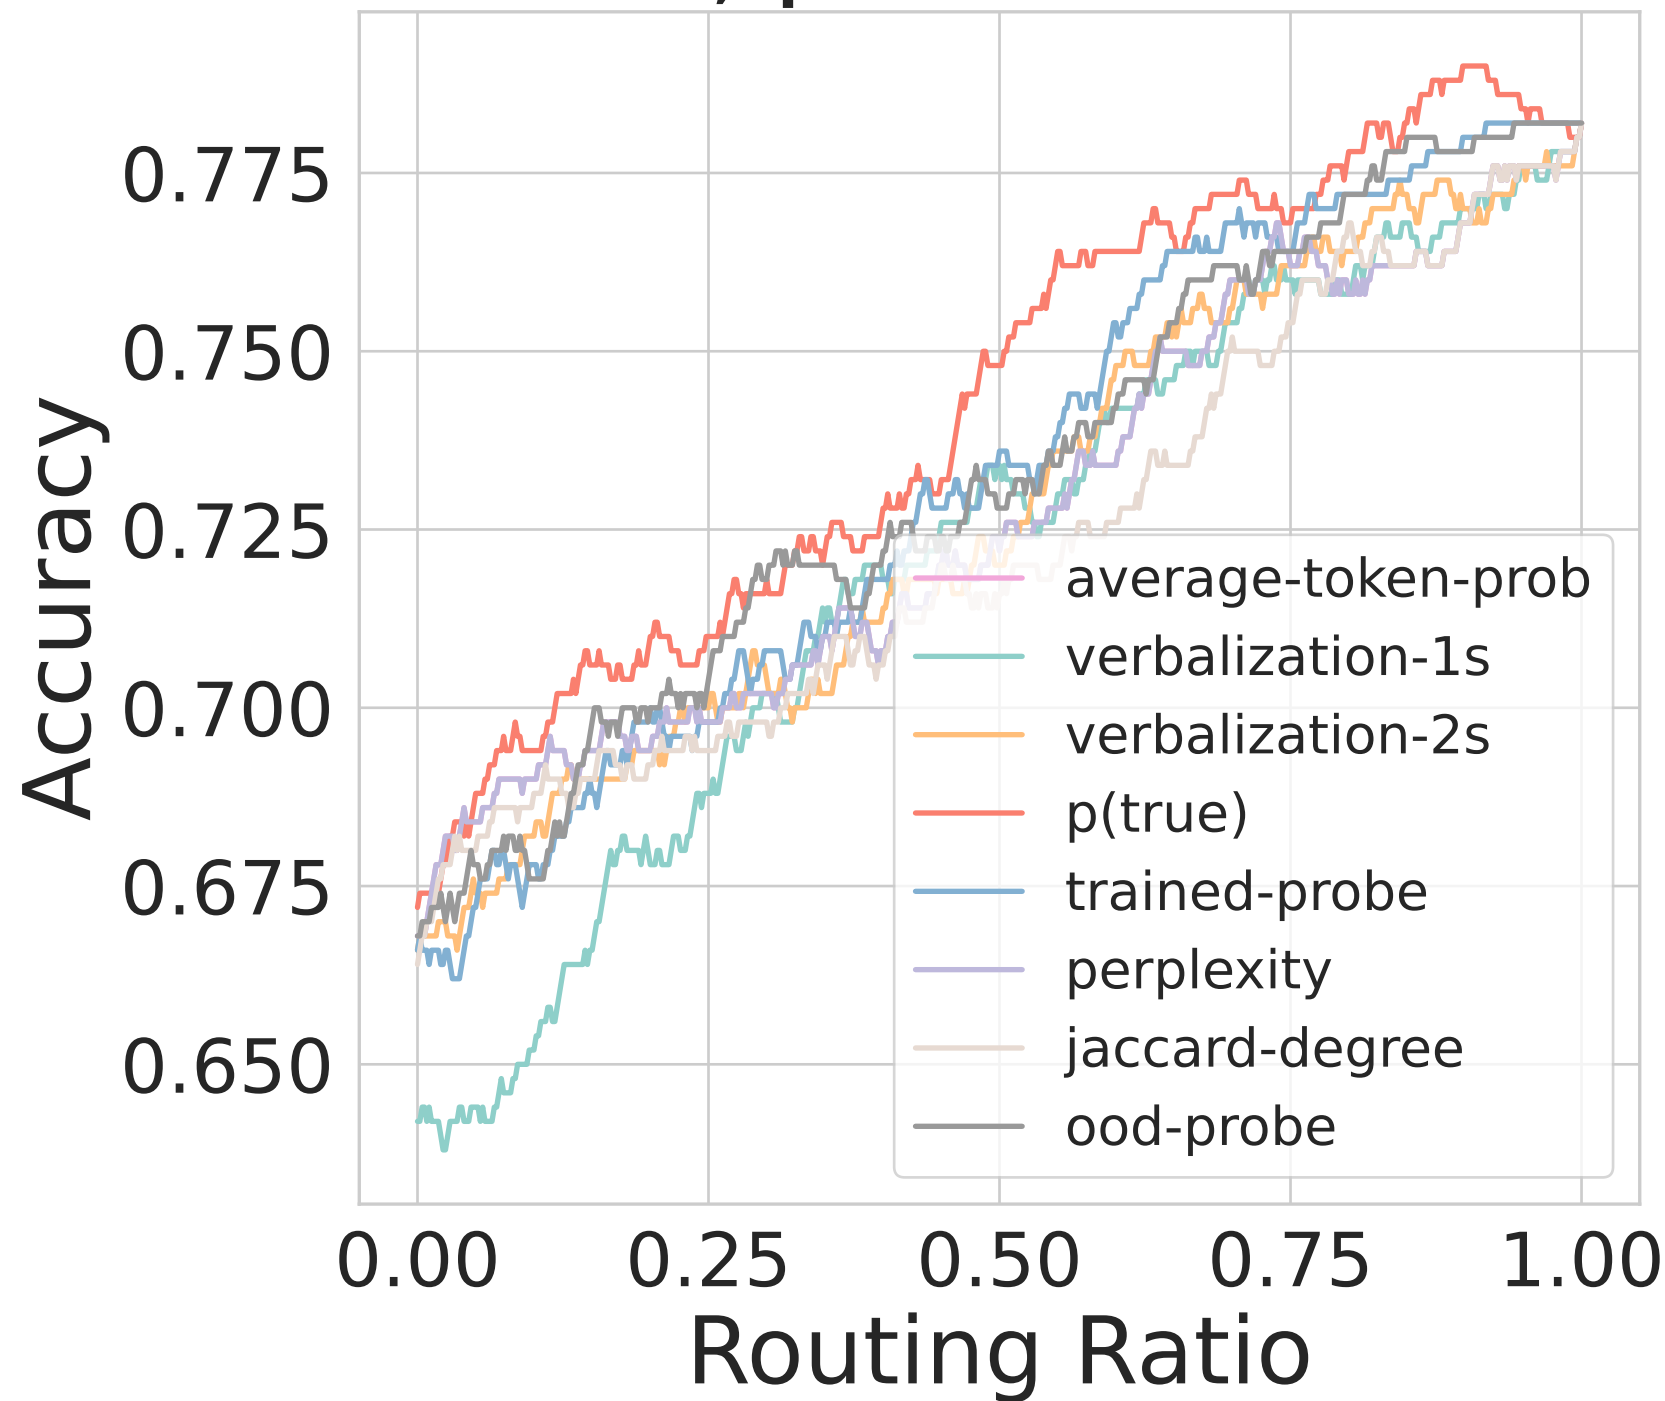

Supplement: supplementary_material [file rr_acc_winogrande_qwen-2.5-7b_gpt41.pdf › Routing_SLM_LLMs/Uncertainty-based Routing/w_legend/to_gpt41/rr_acc_winogrande_qwen-2.5-7b_gpt41.pdf]

## WinoGrande, rwkv to GPT-4.1 mini

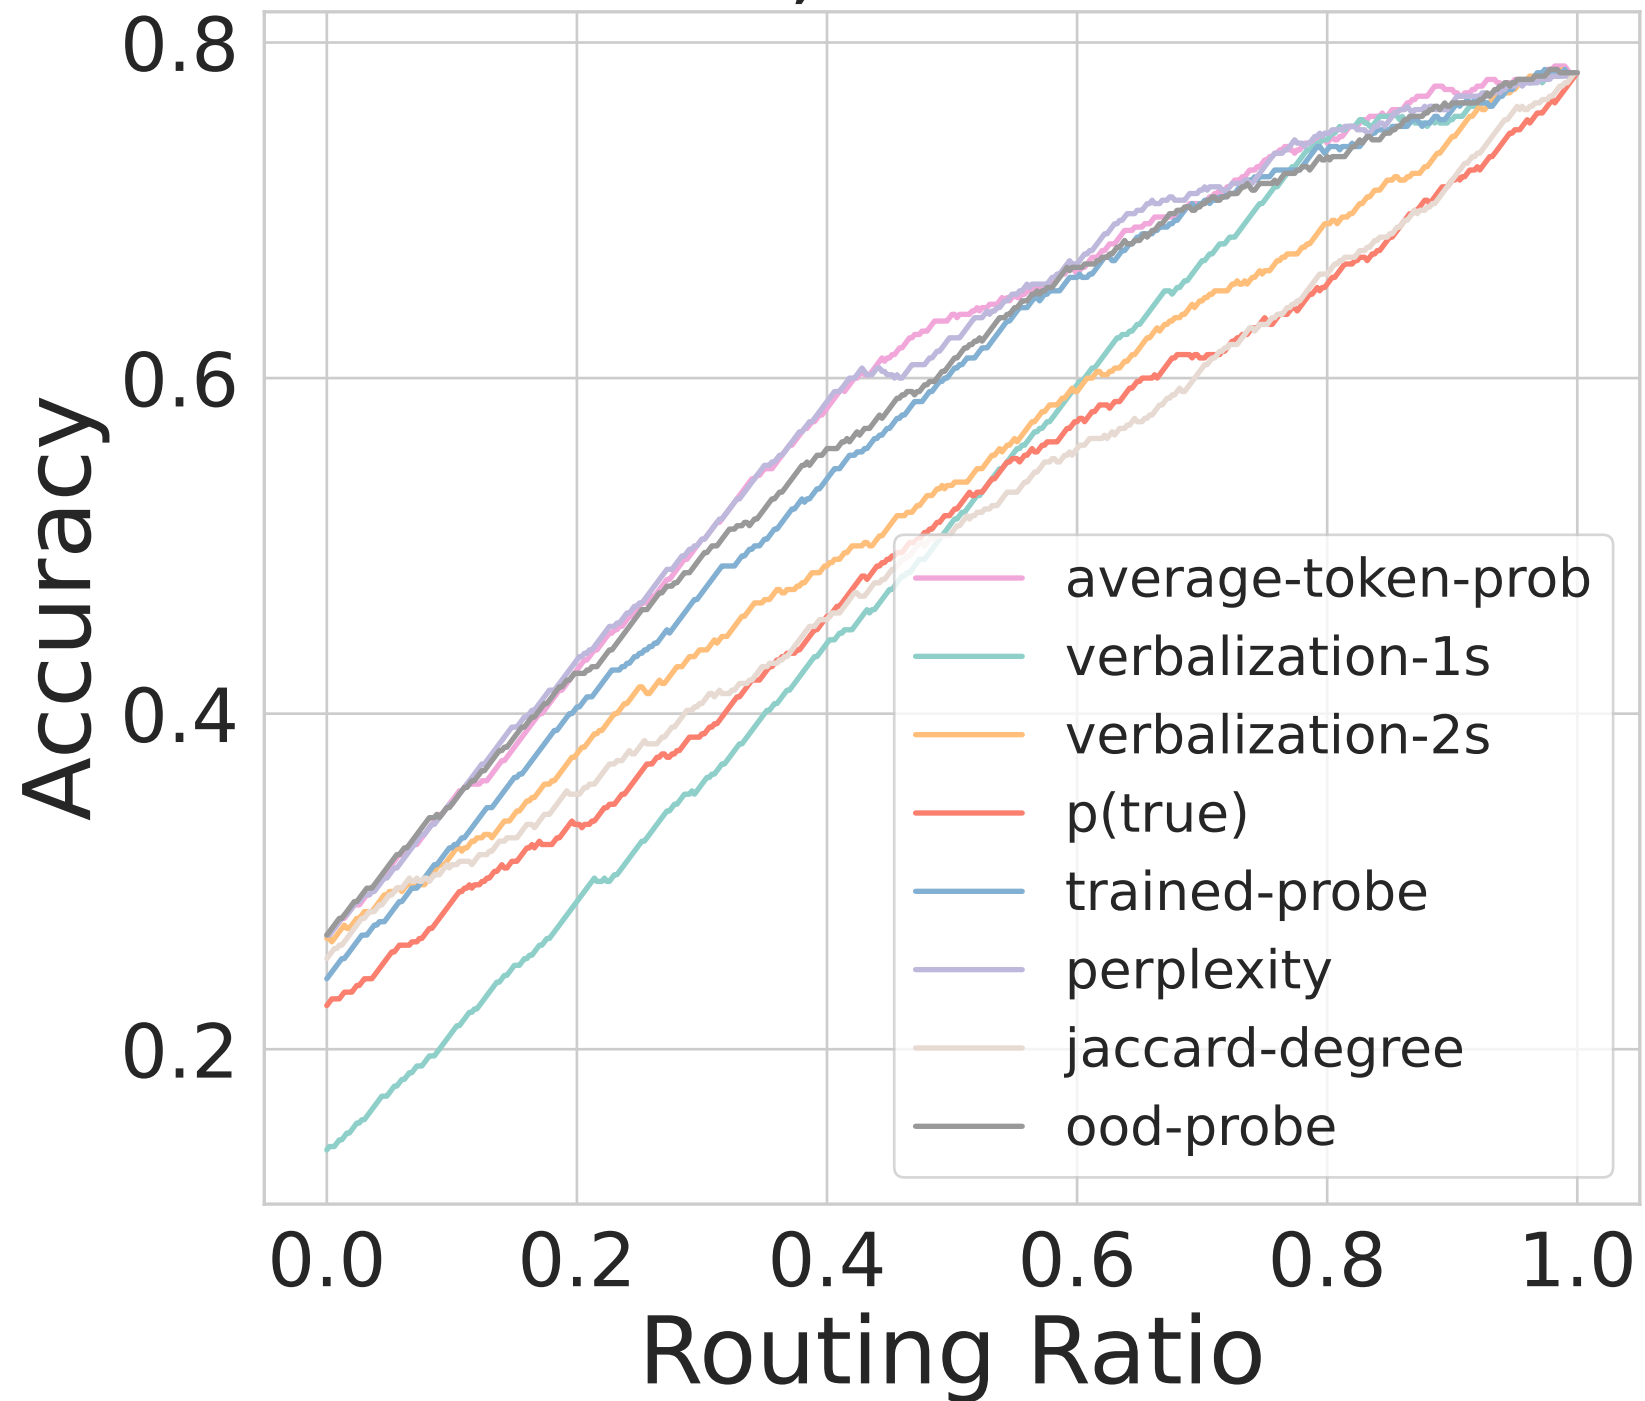

Supplement: supplementary_material [file rr_acc_winogrande_rwkv_gpt41.pdf › Routing_SLM_LLMs/Uncertainty-based Routing/w_legend/to_gpt41/rr_acc_winogrande_rwkv_gpt41.pdf]

**AQuA, Qwen3-4B to Llama-3.1-70B**

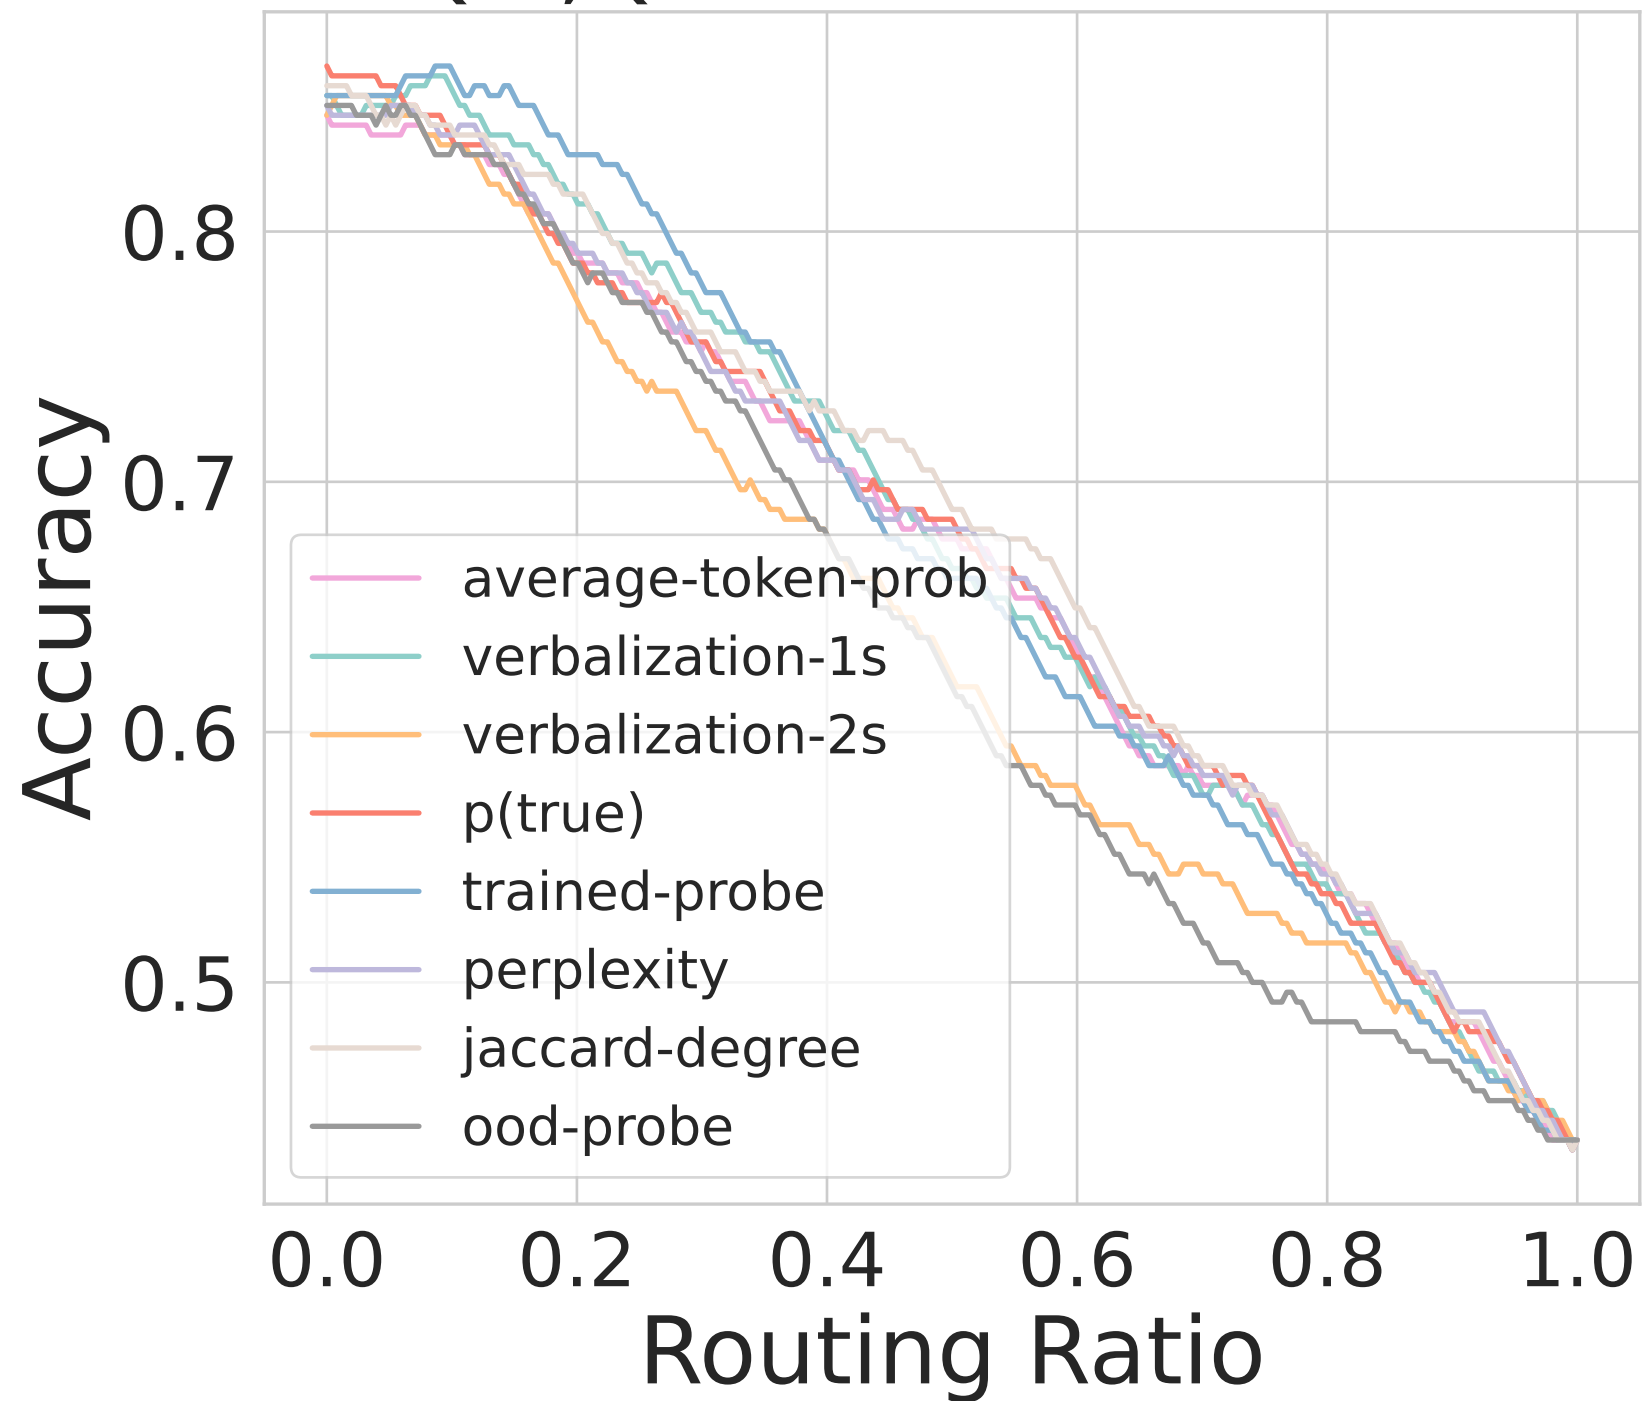

Supplement: supplementary_material [file rr_acc_aqua_Qwen3-4B_llama70.pdf › Routing_SLM_LLMs/Uncertainty-based Routing/w_legend/to_llama70/rr_acc_aqua_Qwen3-4B_llama70.pdf]

**AQuA, granite-3.1-8b to Llama-3.1-70B**

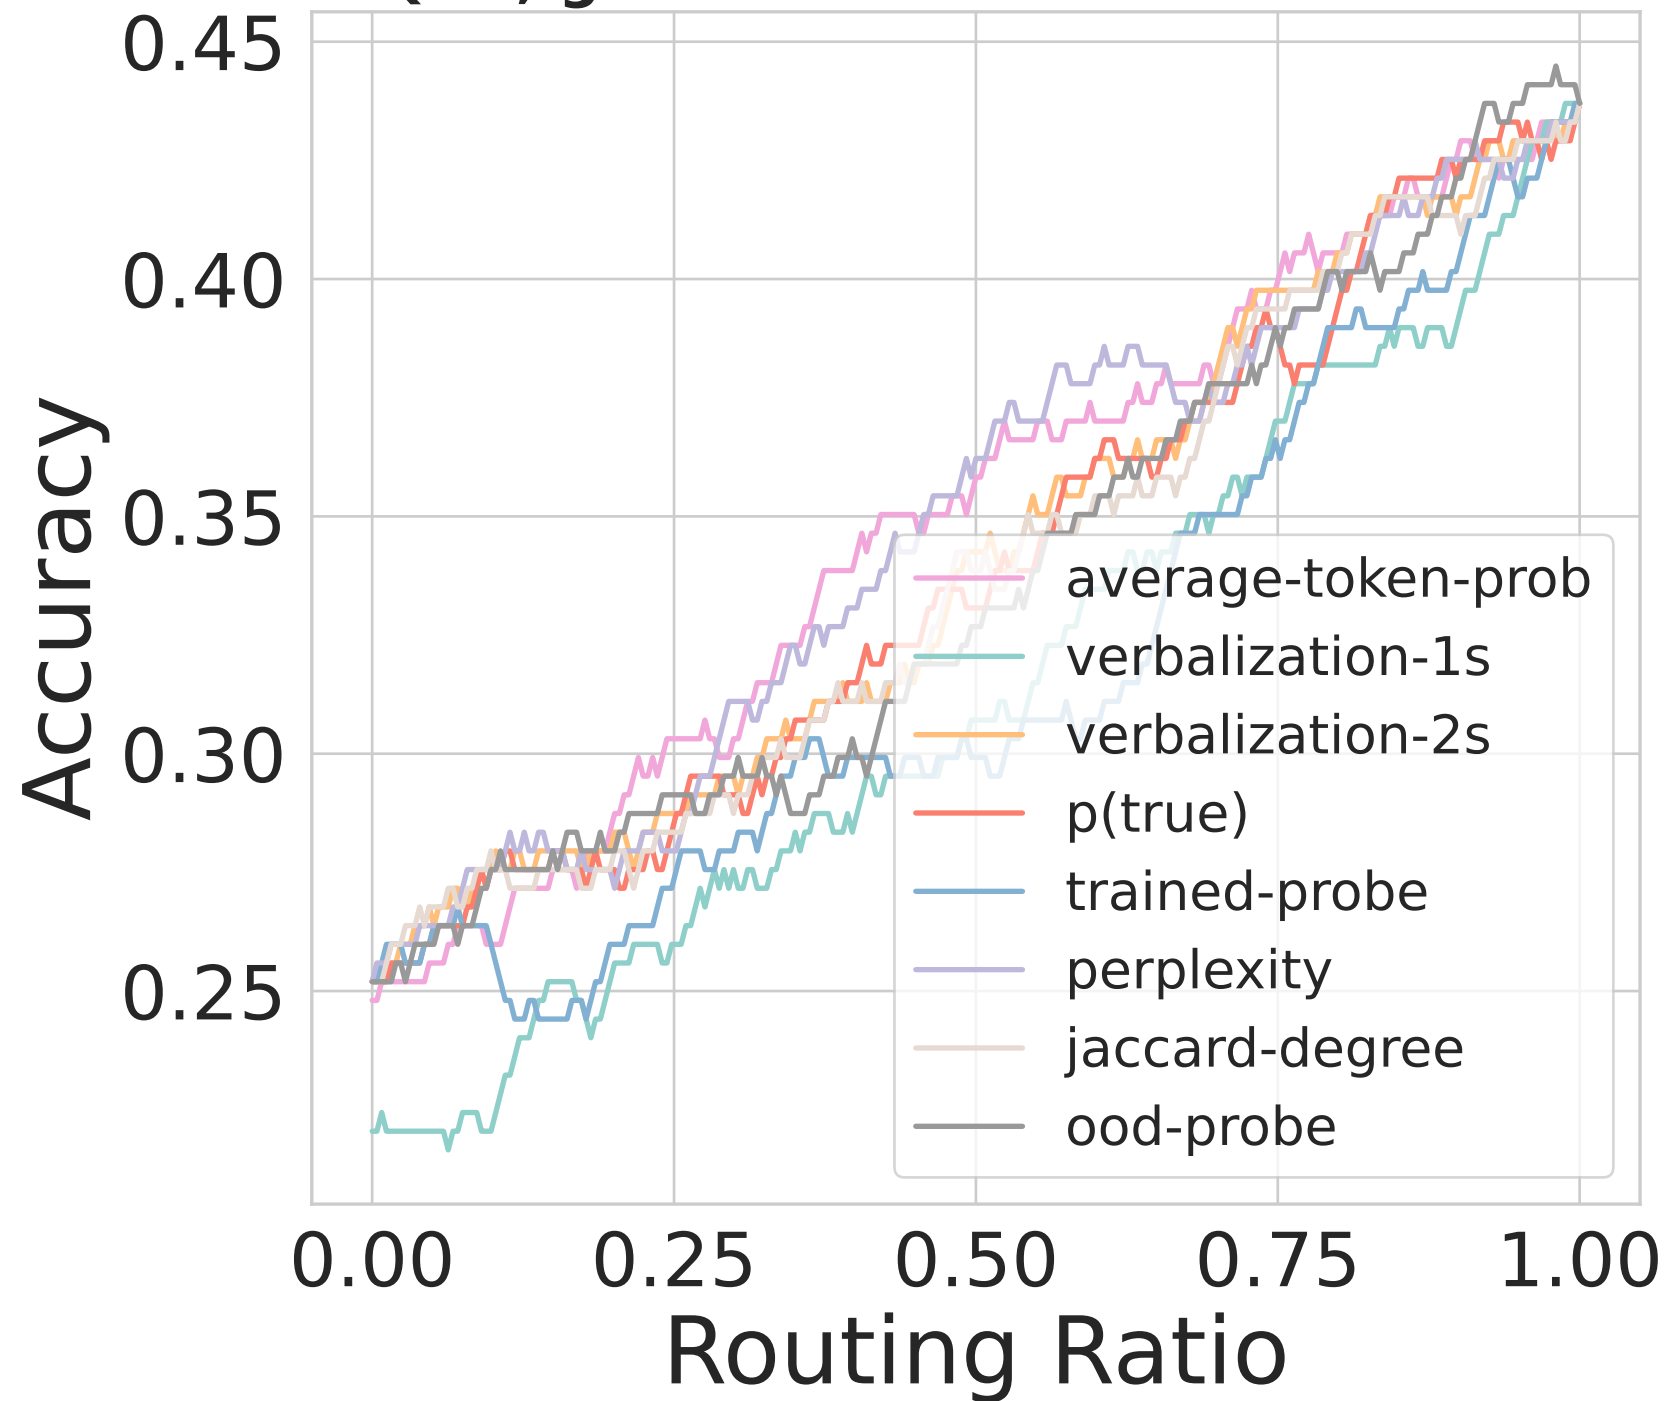

Supplement: supplementary_material [file rr_acc_aqua_granite-3.1-8b_llama70.pdf › Routing_SLM_LLMs/Uncertainty-based Routing/w_legend/to_llama70/rr_acc_aqua_granite-3.1-8b_llama70.pdf]

# AQuA, llama-3.1-8b to Llama-3.1-70B

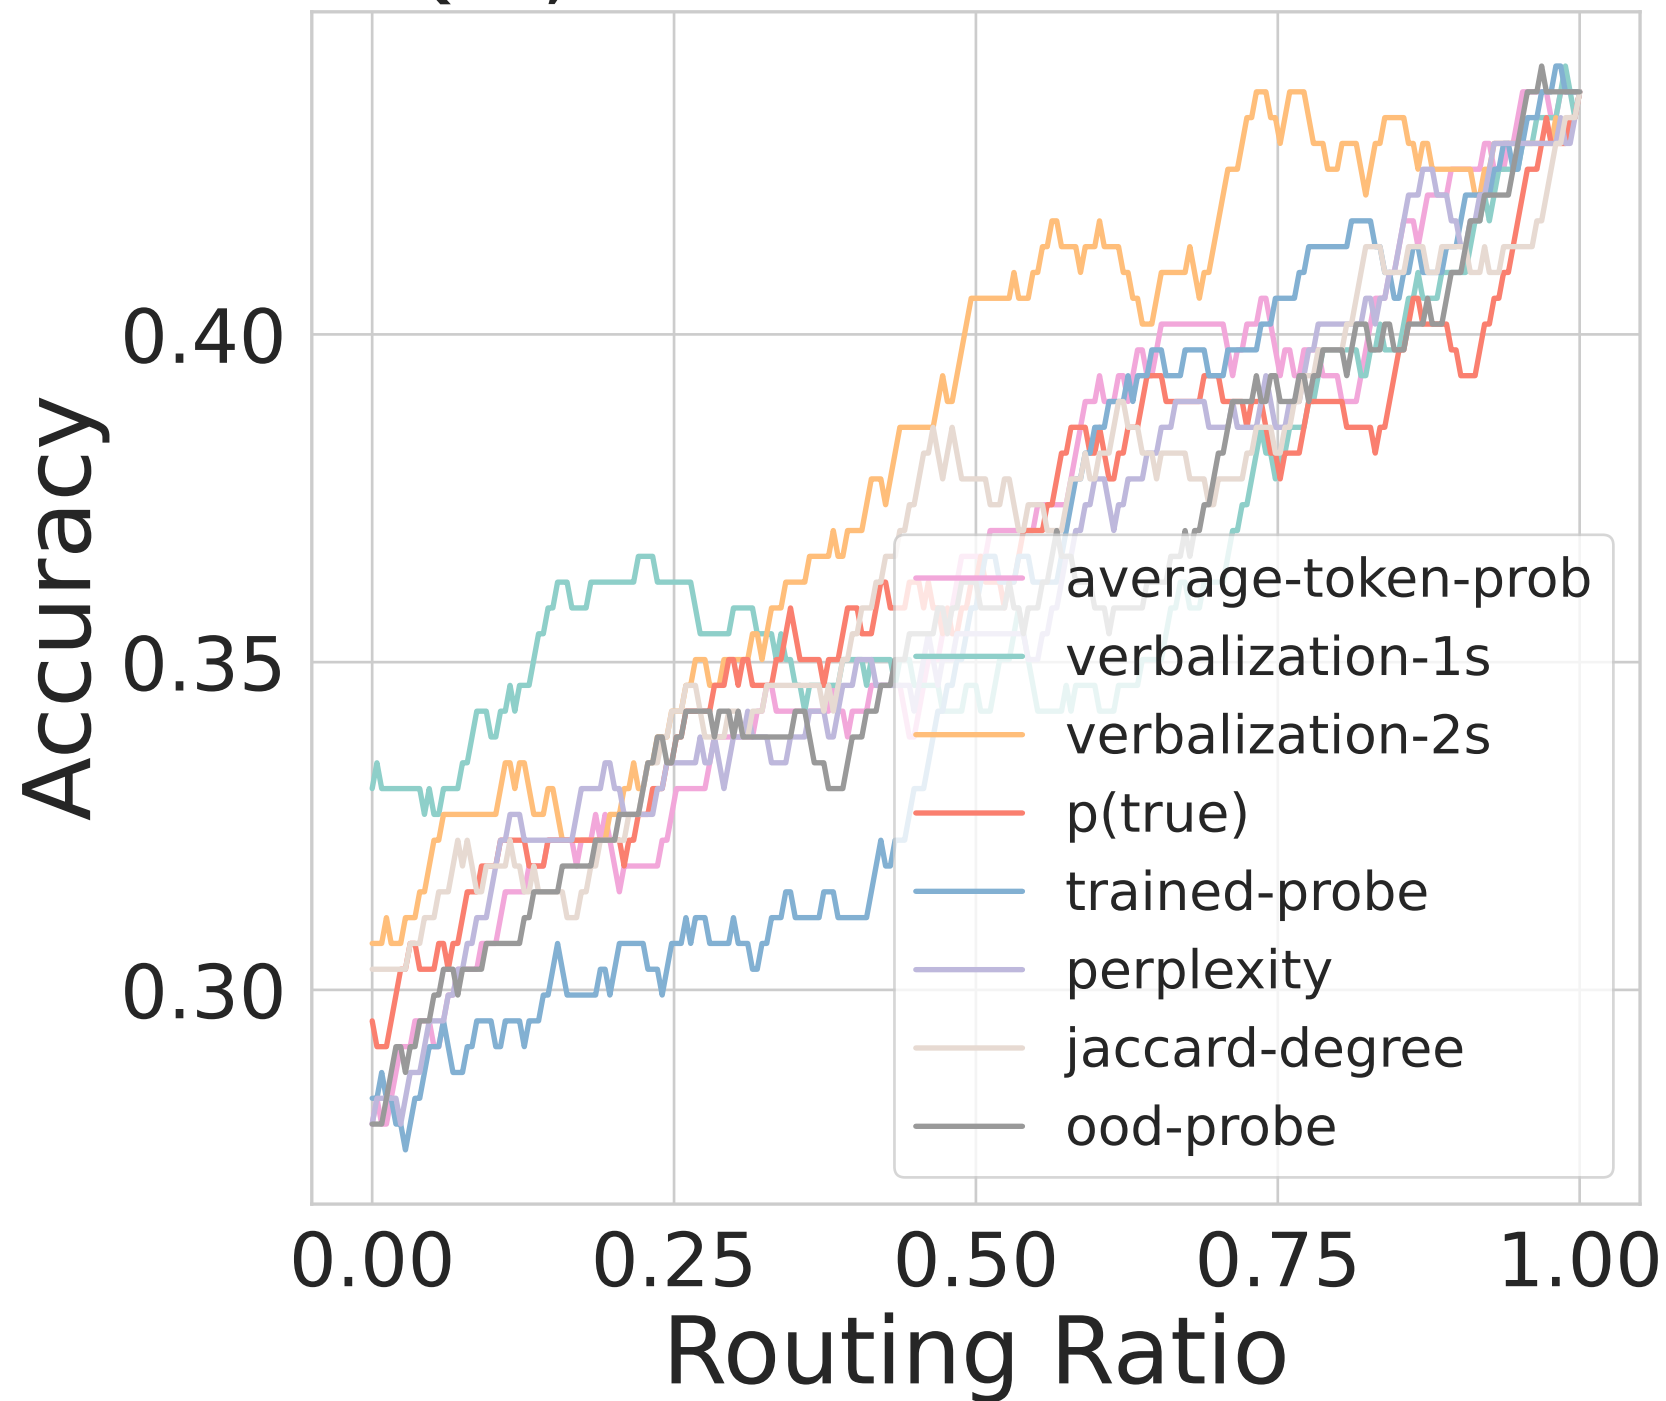

Supplement: supplementary_material [file rr_acc_aqua_llama-3.1-8b_llama70.pdf › Routing_SLM_LLMs/Uncertainty-based Routing/w_legend/to_llama70/rr_acc_aqua_llama-3.1-8b_llama70.pdf]

# AQuA, llama-3.2-1b to Llama-3.1-70B

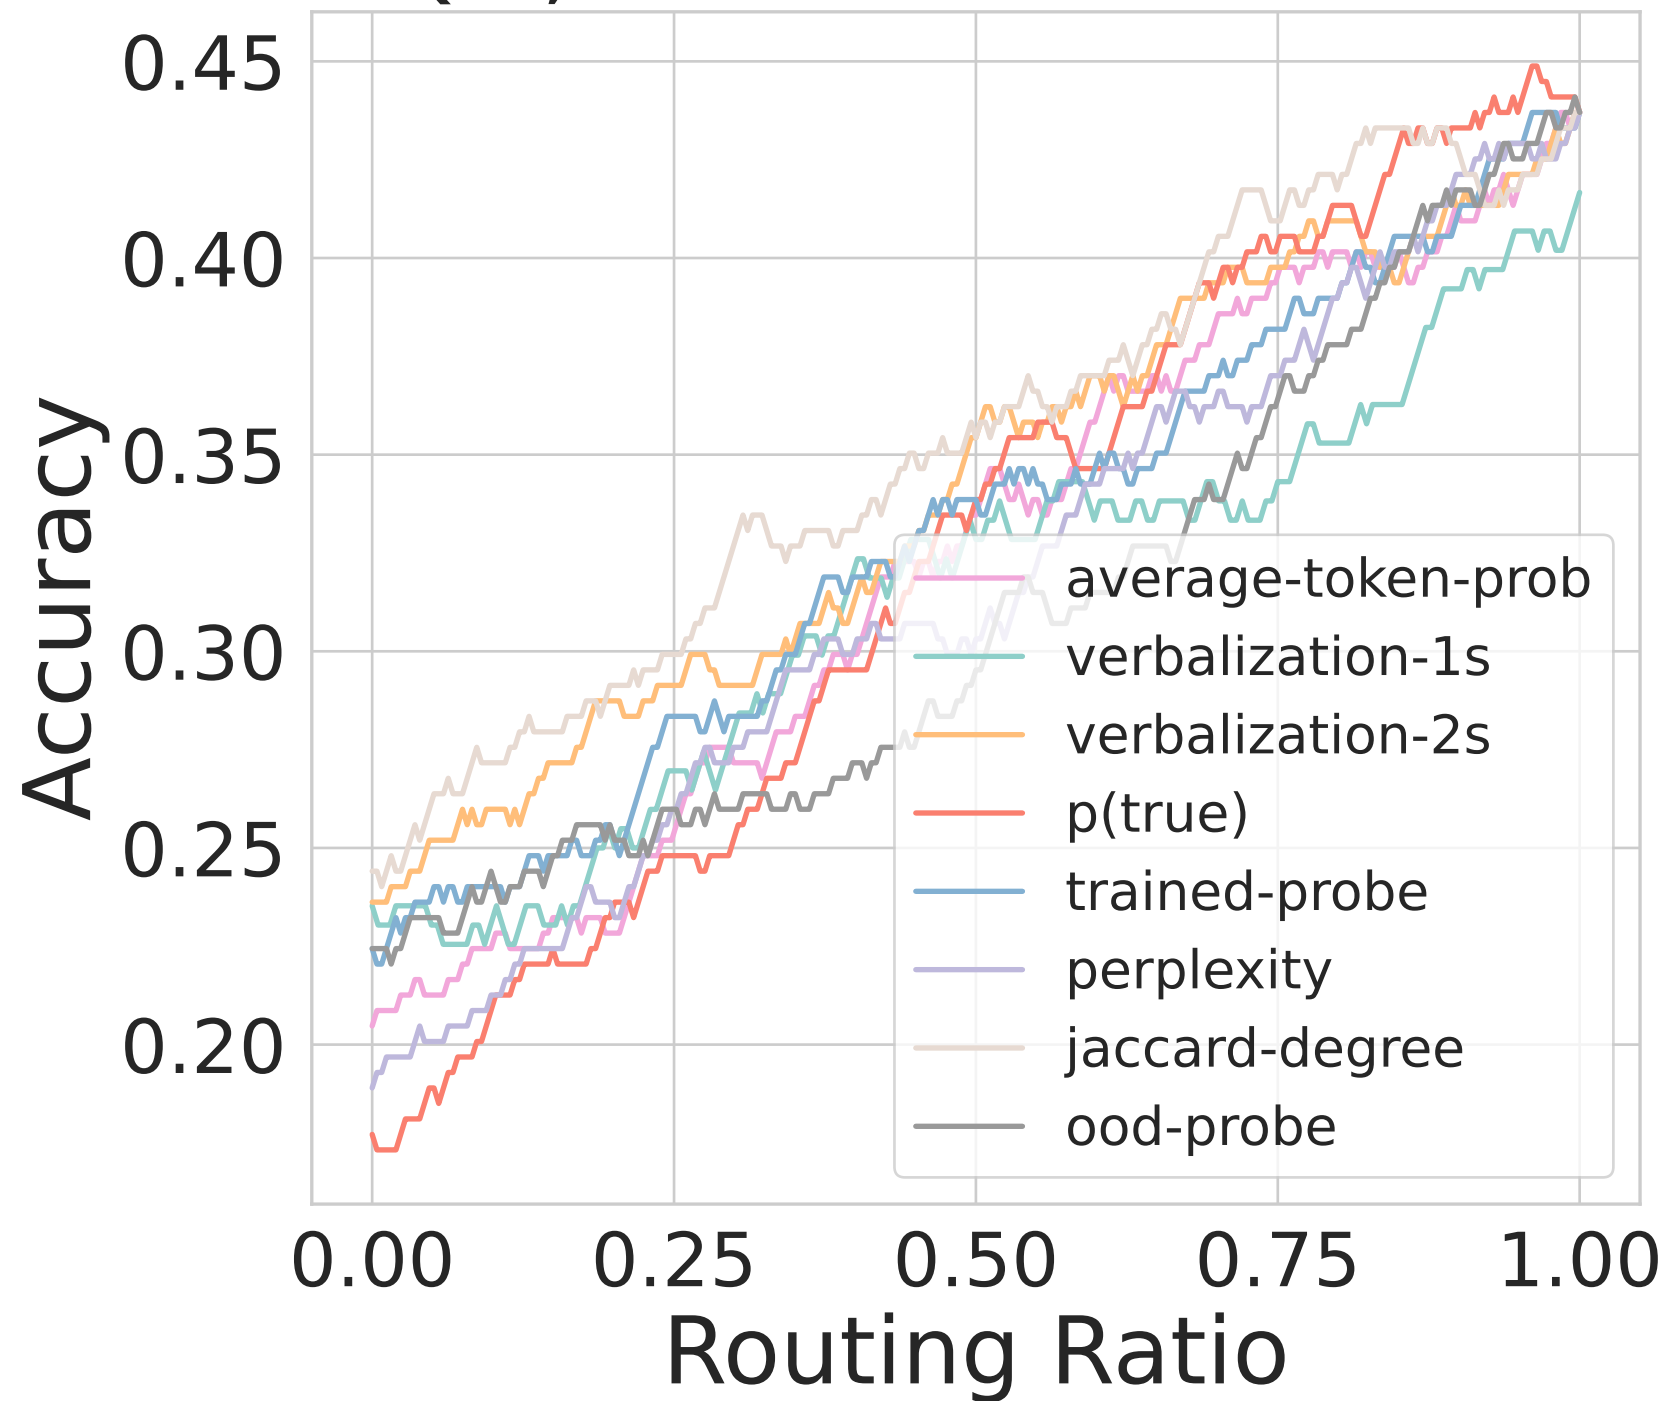

Supplement: supplementary_material [file rr_acc_aqua_llama-3.2-1b_llama70.pdf › Routing_SLM_LLMs/Uncertainty-based Routing/w_legend/to_llama70/rr_acc_aqua_llama-3.2-1b_llama70.pdf]

**AQuA, llama-3.2-3b to Llama-3.1-70B**

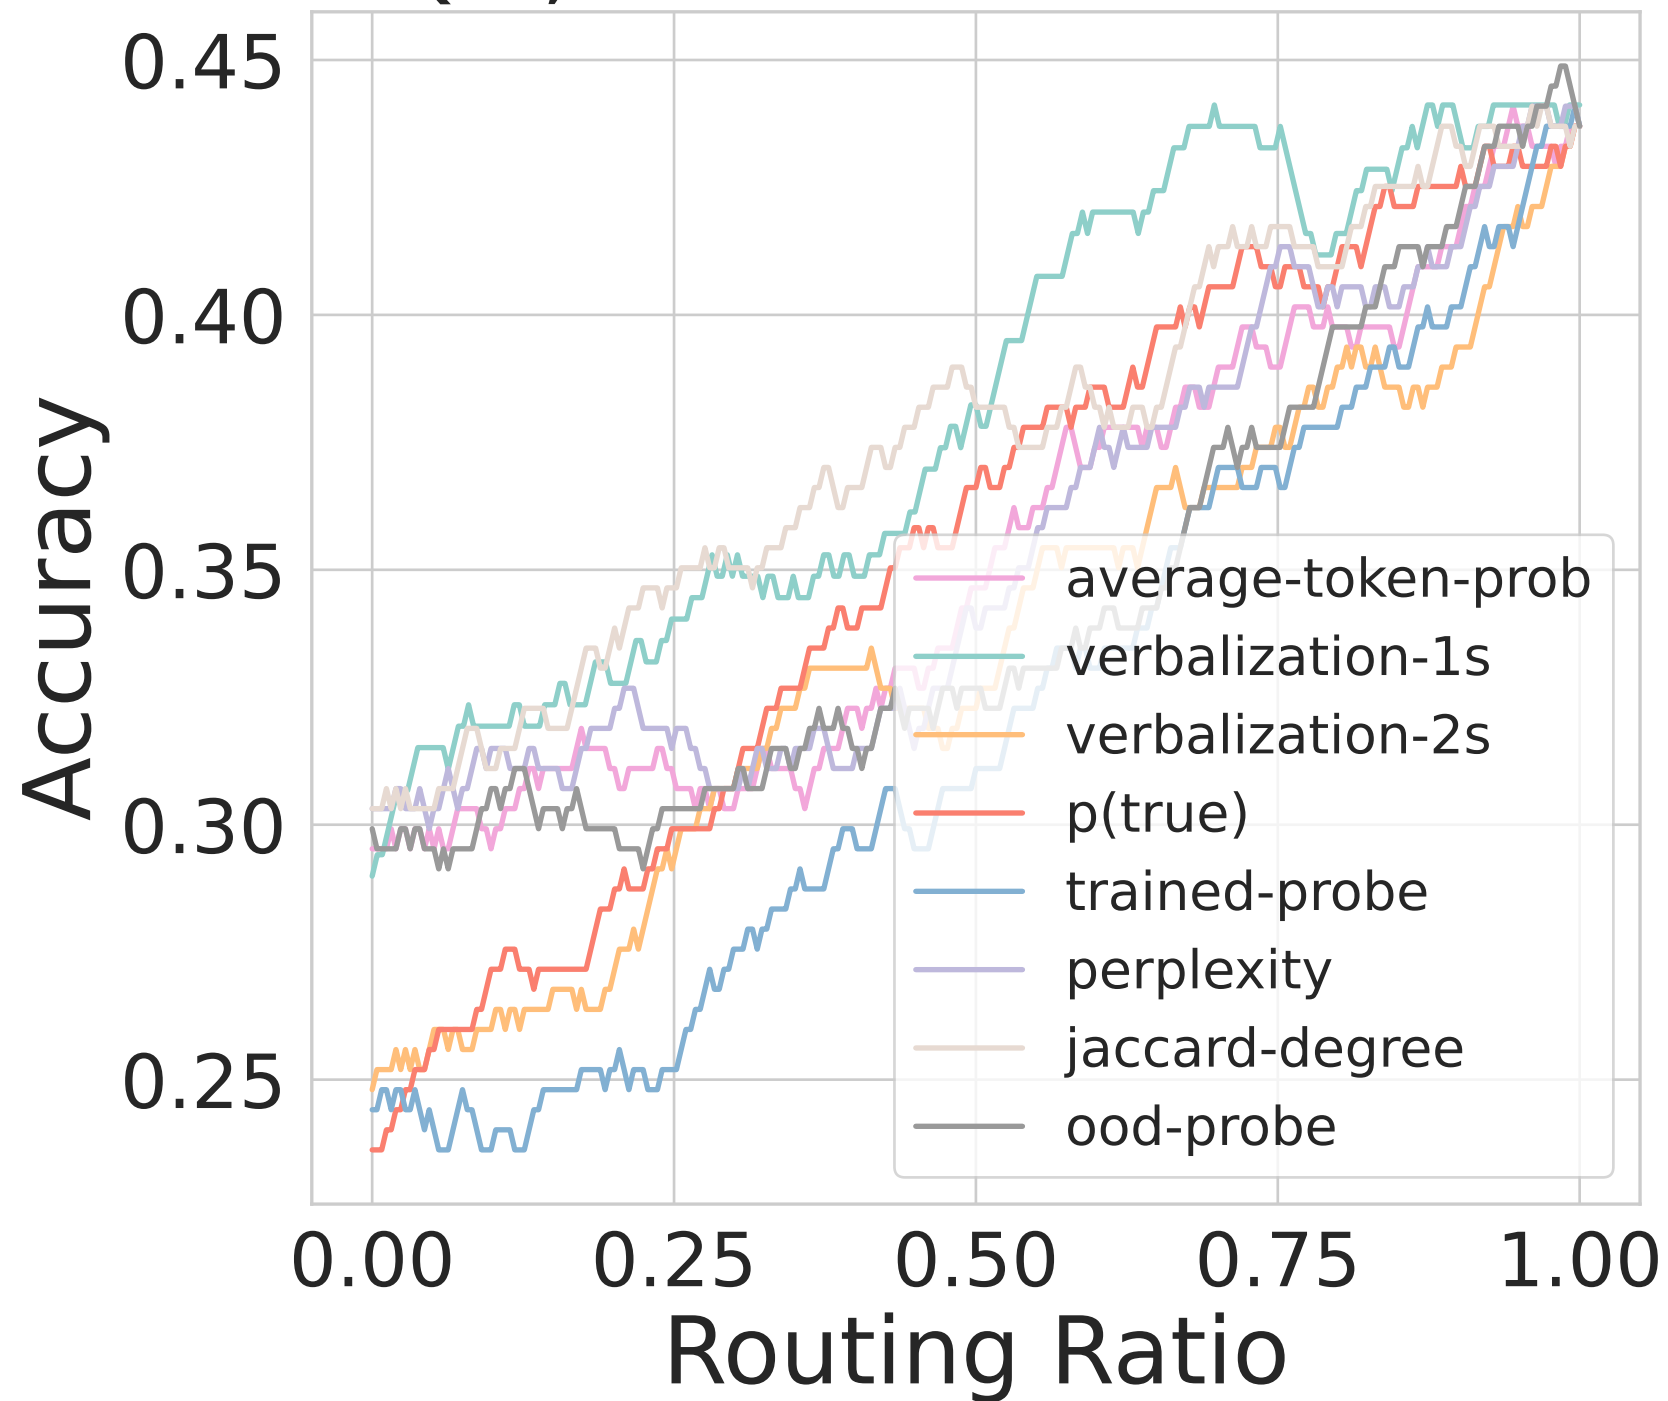

Supplement: supplementary_material [file rr_acc_aqua_llama-3.2-3b_llama70.pdf › Routing_SLM_LLMs/Uncertainty-based Routing/w_legend/to_llama70/rr_acc_aqua_llama-3.2-3b_llama70.pdf]

**AQuA, mistral-7b to Llama-3.1-70B**

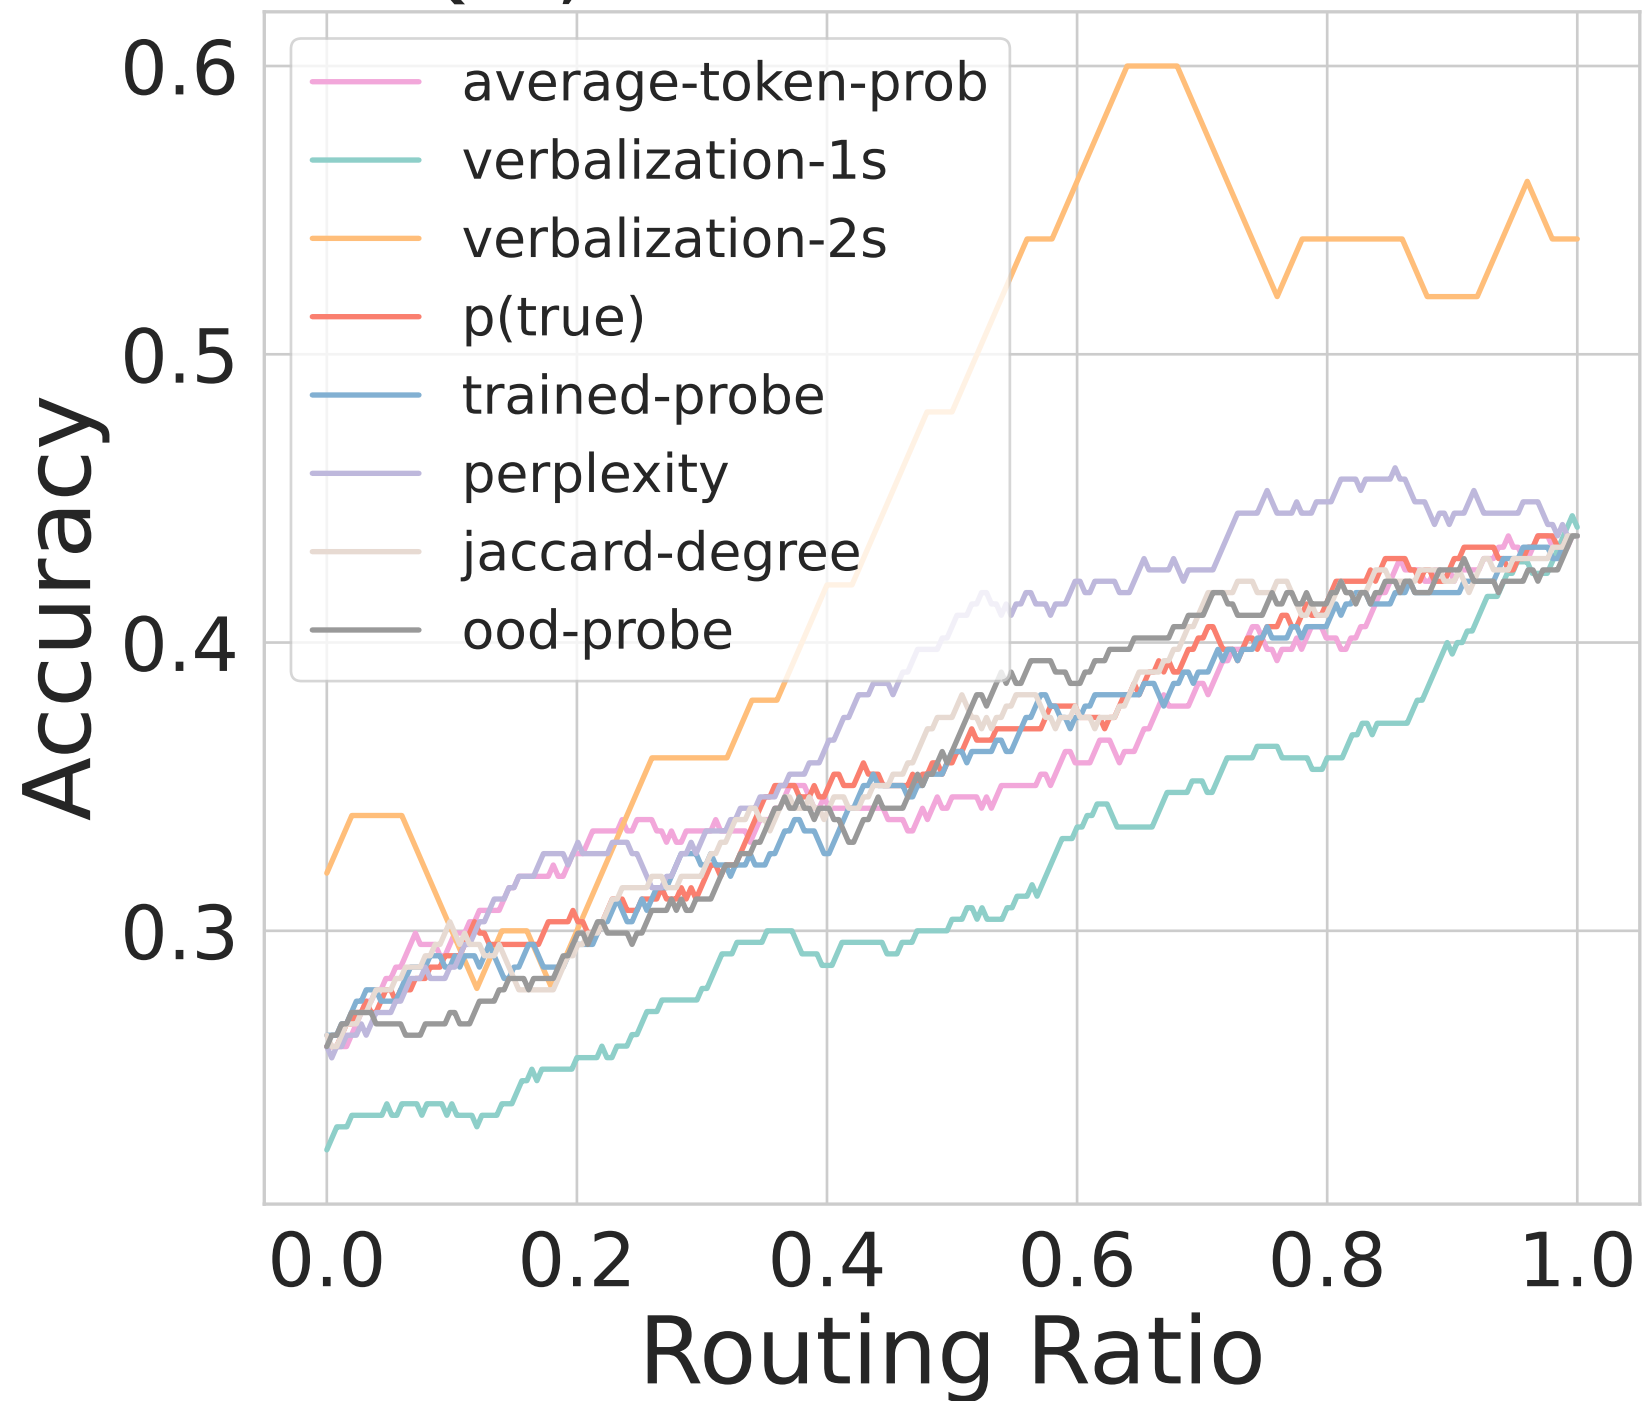

Supplement: supplementary_material [file rr_acc_aqua_mistral-7b_llama70.pdf › Routing_SLM_LLMs/Uncertainty-based Routing/w_legend/to_llama70/rr_acc_aqua_mistral-7b_llama70.pdf]

# AQuA, phi-3.5-mini to Llama-3.1-70B

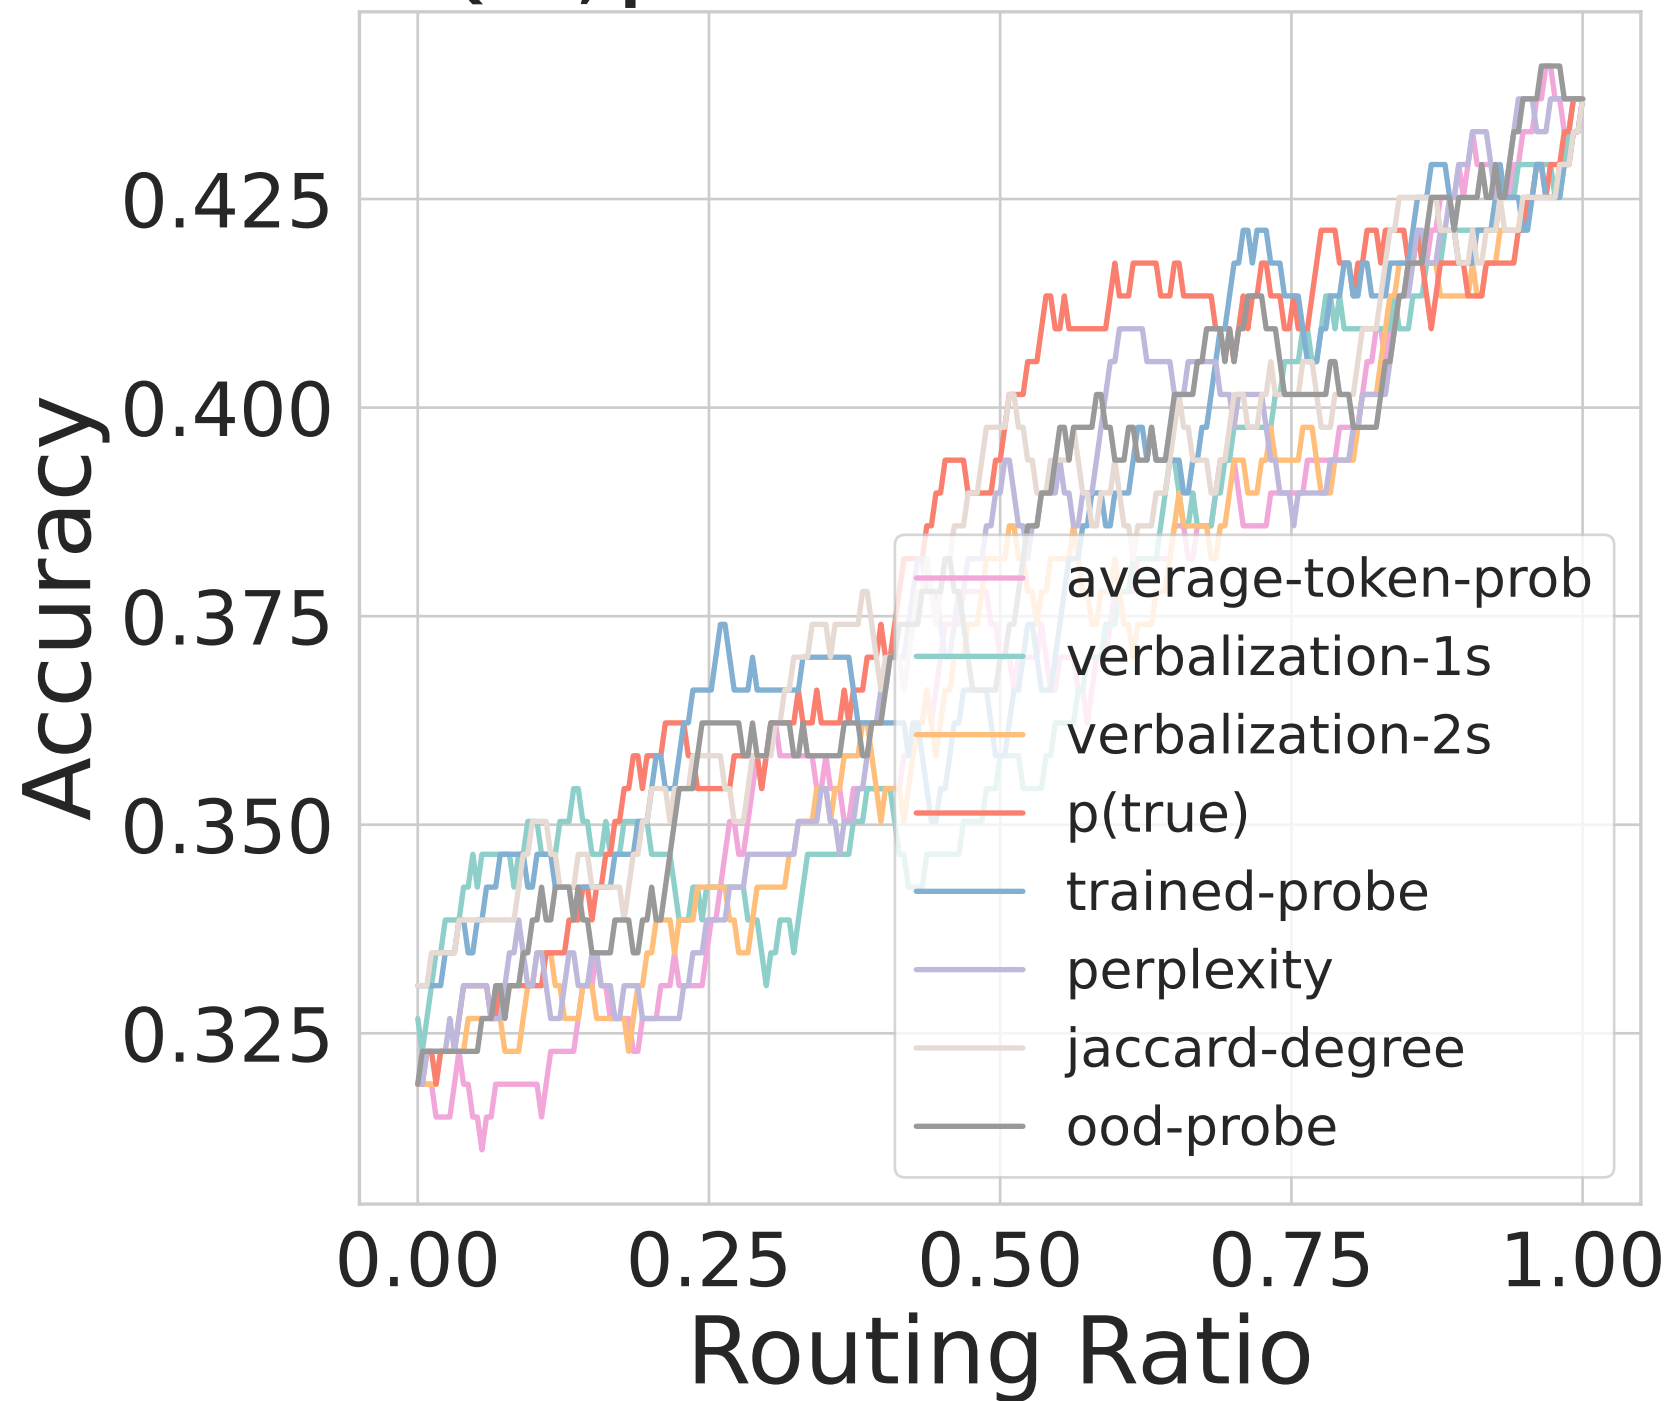

Supplement: supplementary_material [file rr_acc_aqua_phi-3.5-mini_llama70.pdf › Routing_SLM_LLMs/Uncertainty-based Routing/w_legend/to_llama70/rr_acc_aqua_phi-3.5-mini_llama70.pdf]

**AQuA, qwen-2.5-7b to Llama-3.1-70B**

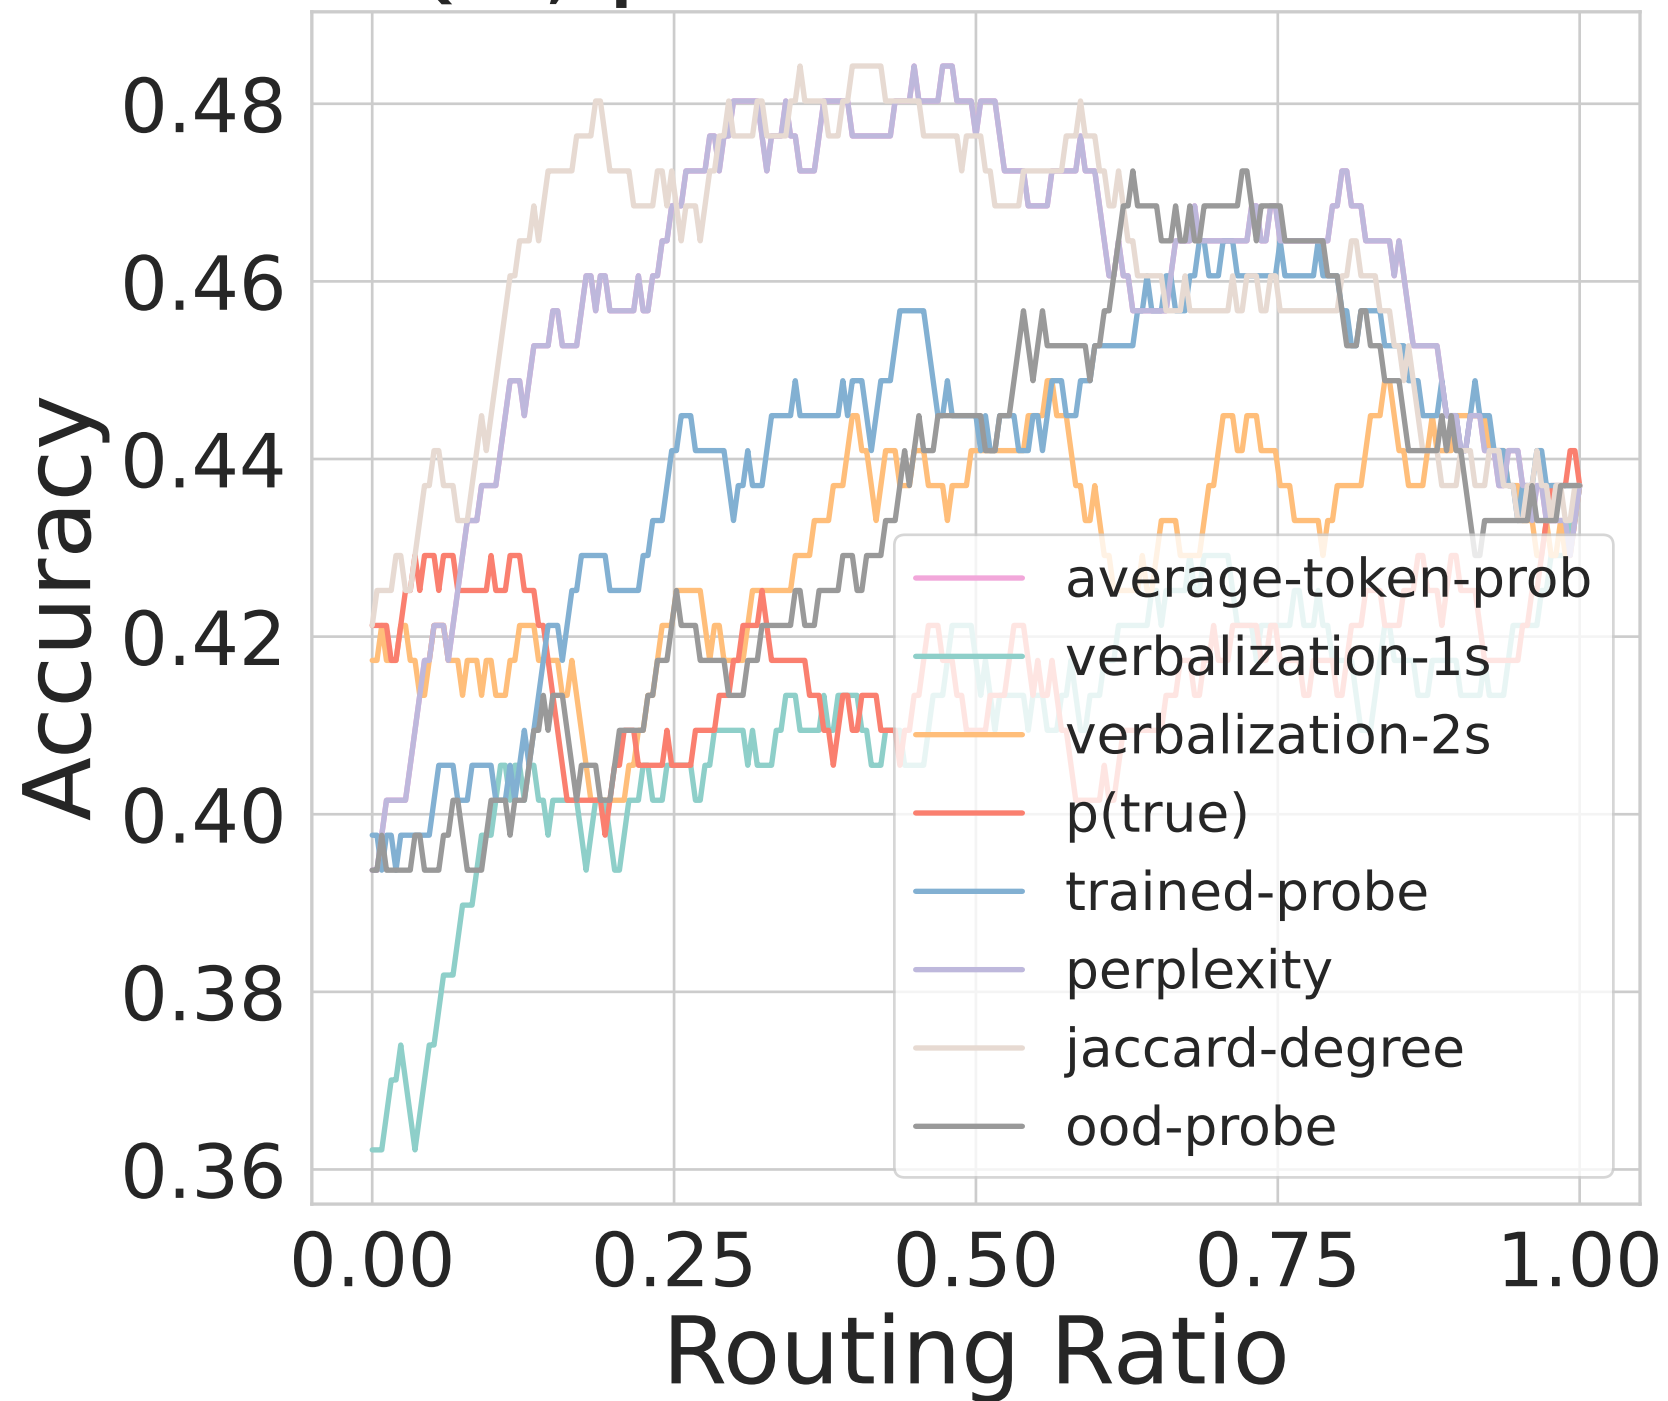

Supplement: supplementary_material [file rr_acc_aqua_qwen-2.5-7b_llama70.pdf › Routing_SLM_LLMs/Uncertainty-based Routing/w_legend/to_llama70/rr_acc_aqua_qwen-2.5-7b_llama70.pdf]

# AQuA, rwkv to Llama-3.1-70B

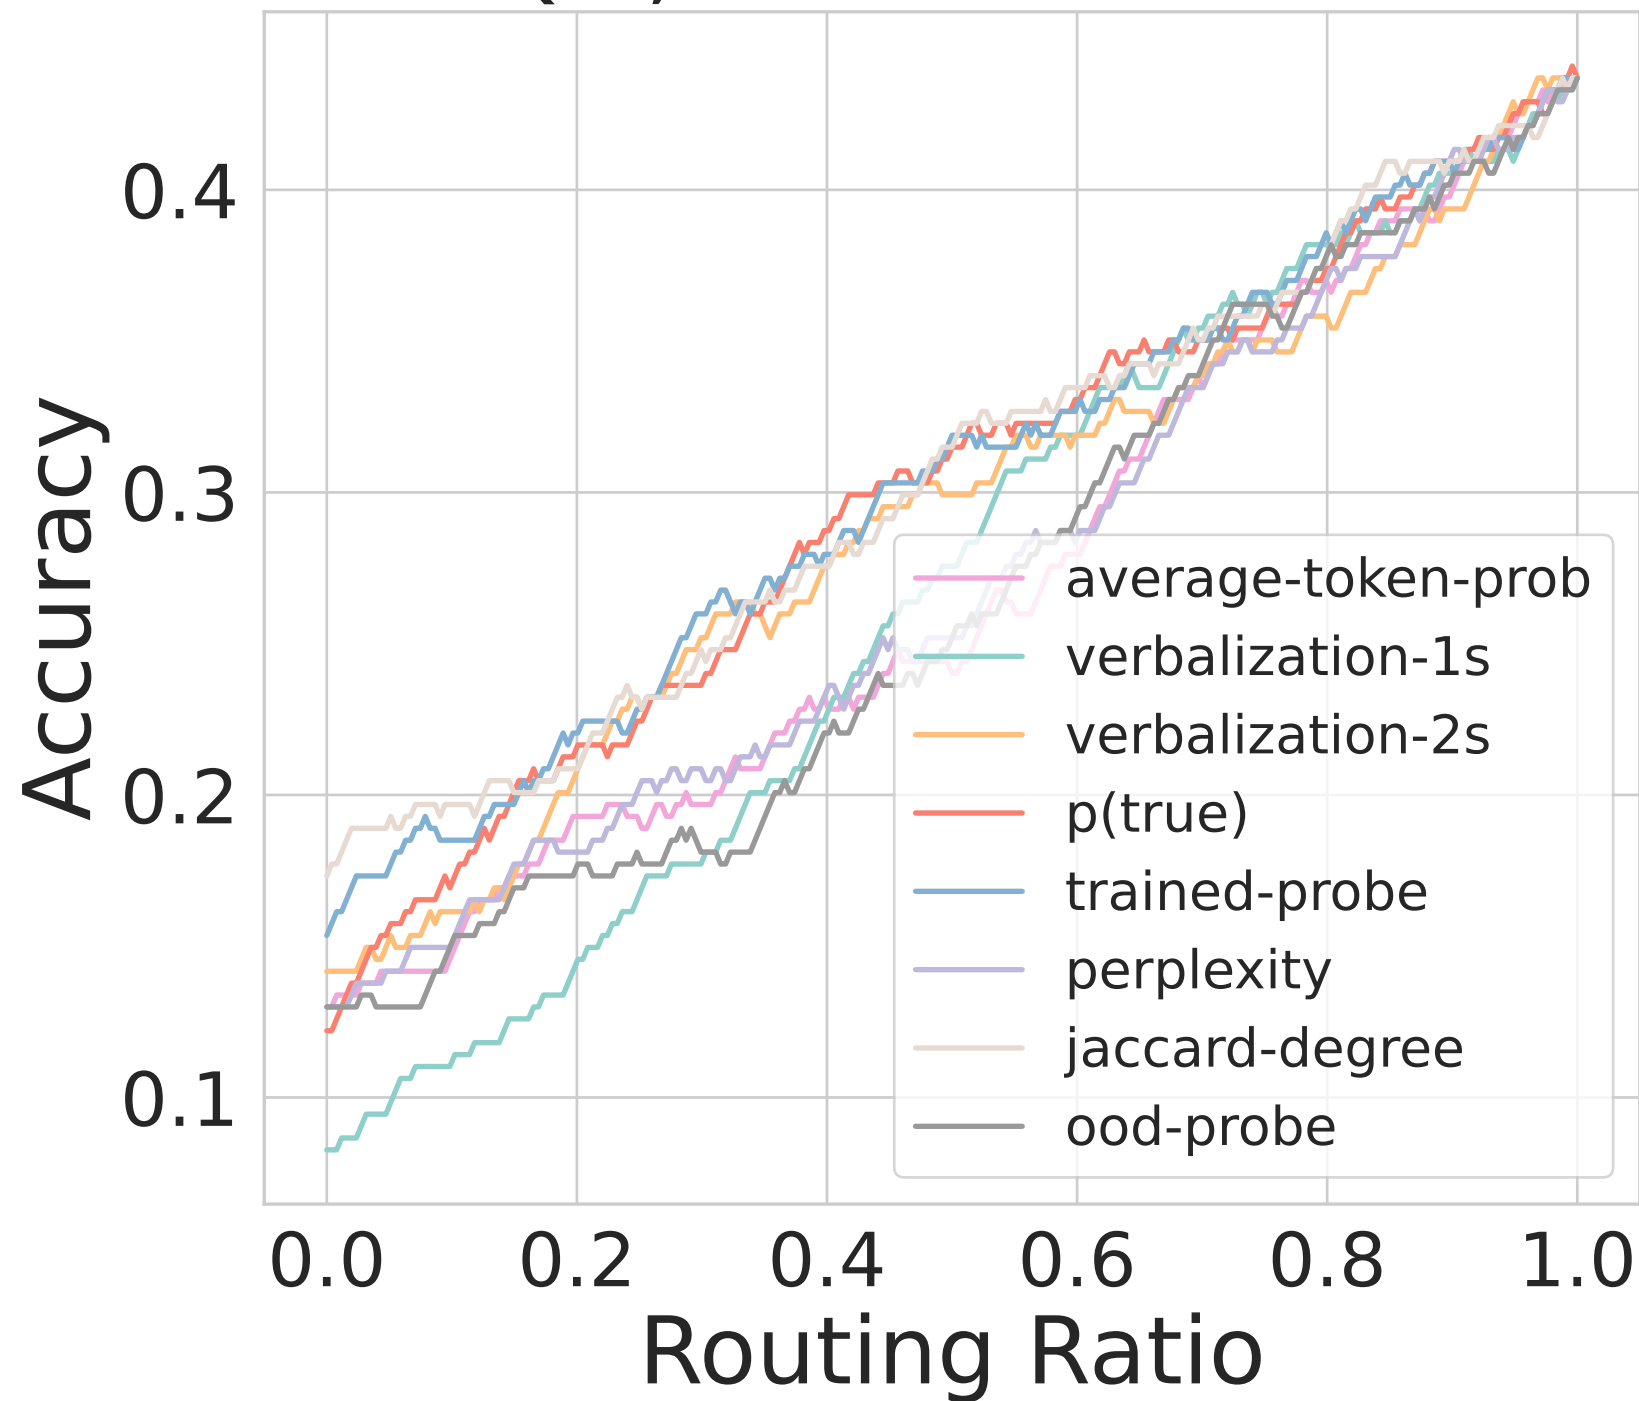

Supplement: supplementary_material [file rr_acc_aqua_rwkv_llama70.pdf › Routing_SLM_LLMs/Uncertainty-based Routing/w_legend/to_llama70/rr_acc_aqua_rwkv_llama70.pdf]

# BoolQ, Qwen3-0.6B to Llama-3.1-70B

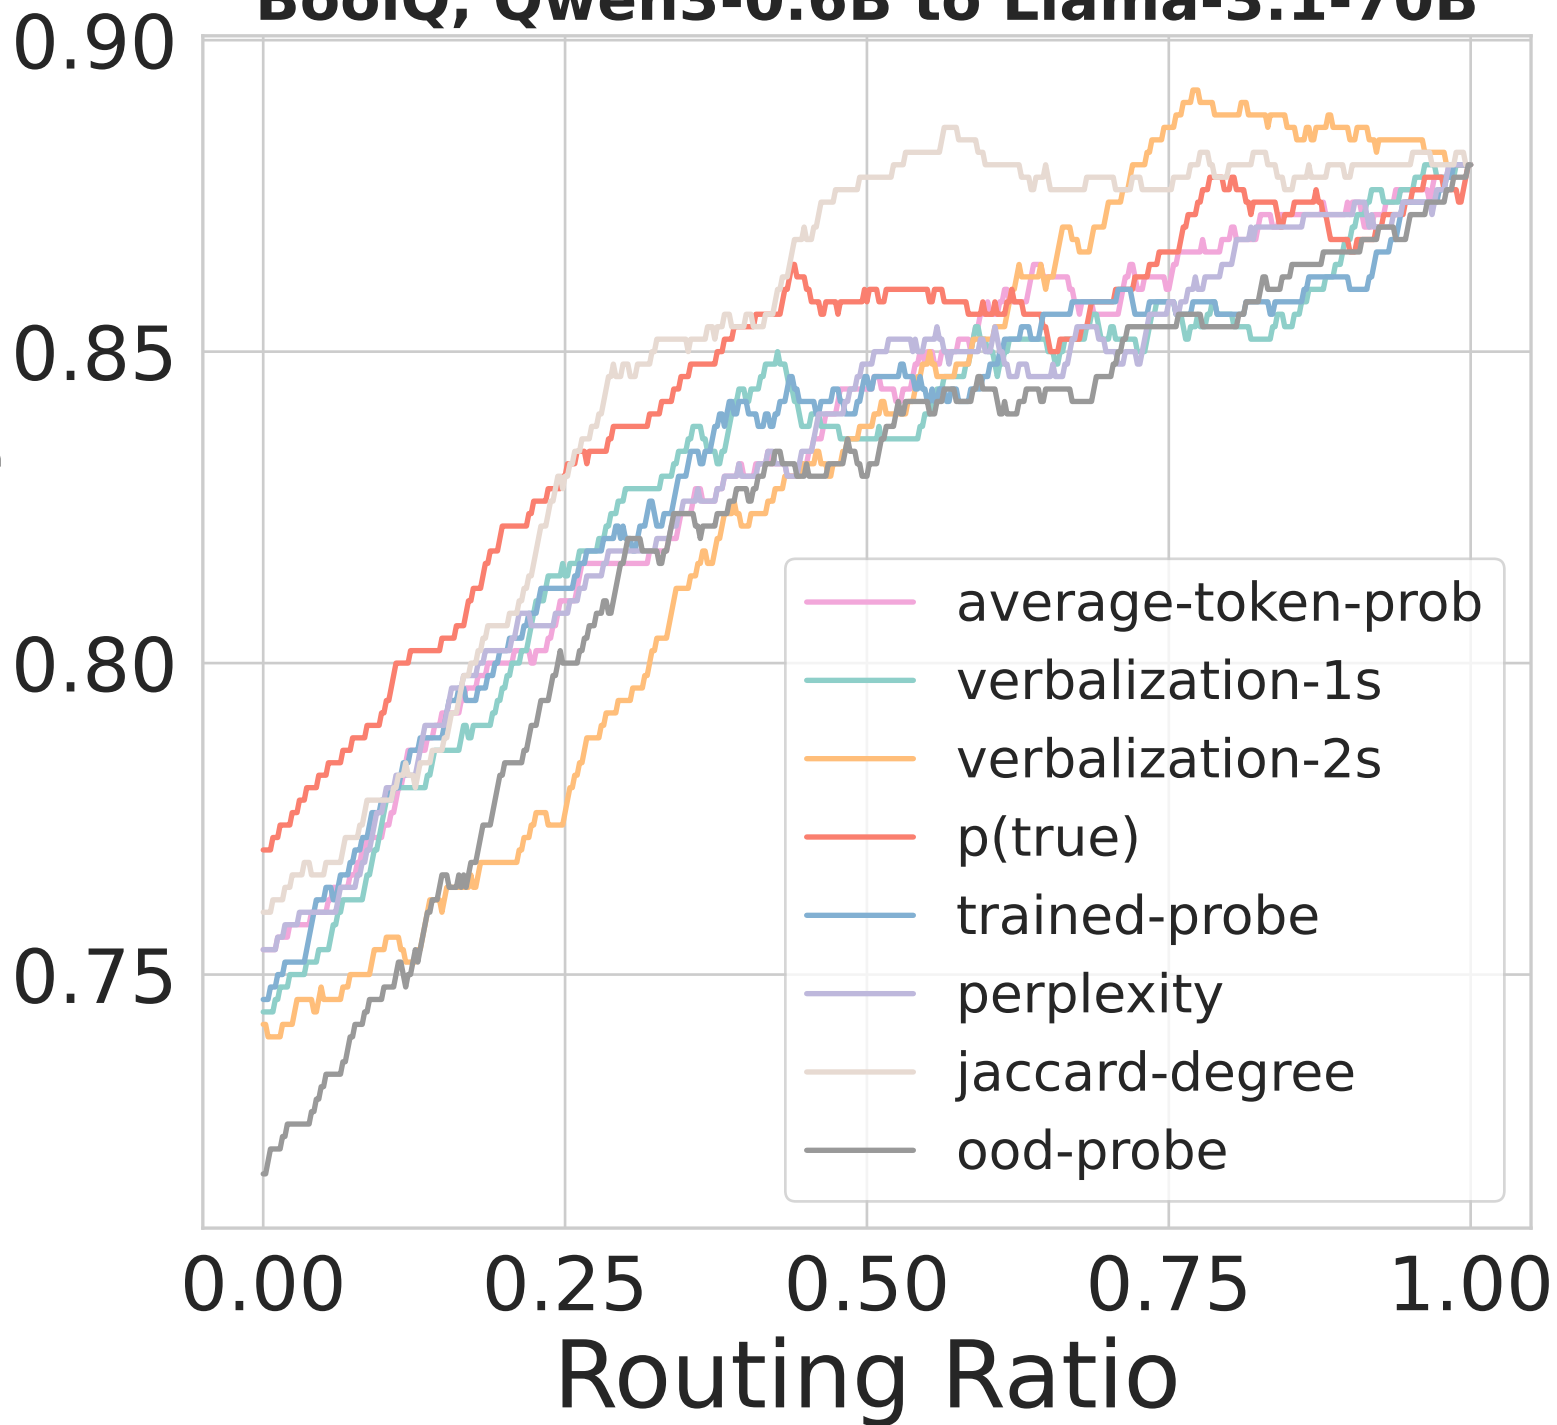

Supplement: supplementary_material [file rr_acc_boolq_Qwen3-0.6B_llama70.pdf › Routing_SLM_LLMs/Uncertainty-based Routing/w_legend/to_llama70/rr_acc_boolq_Qwen3-0.6B_llama70.pdf]

# BoolQ, Qwen3-1.7B to Llama-3.1-70B

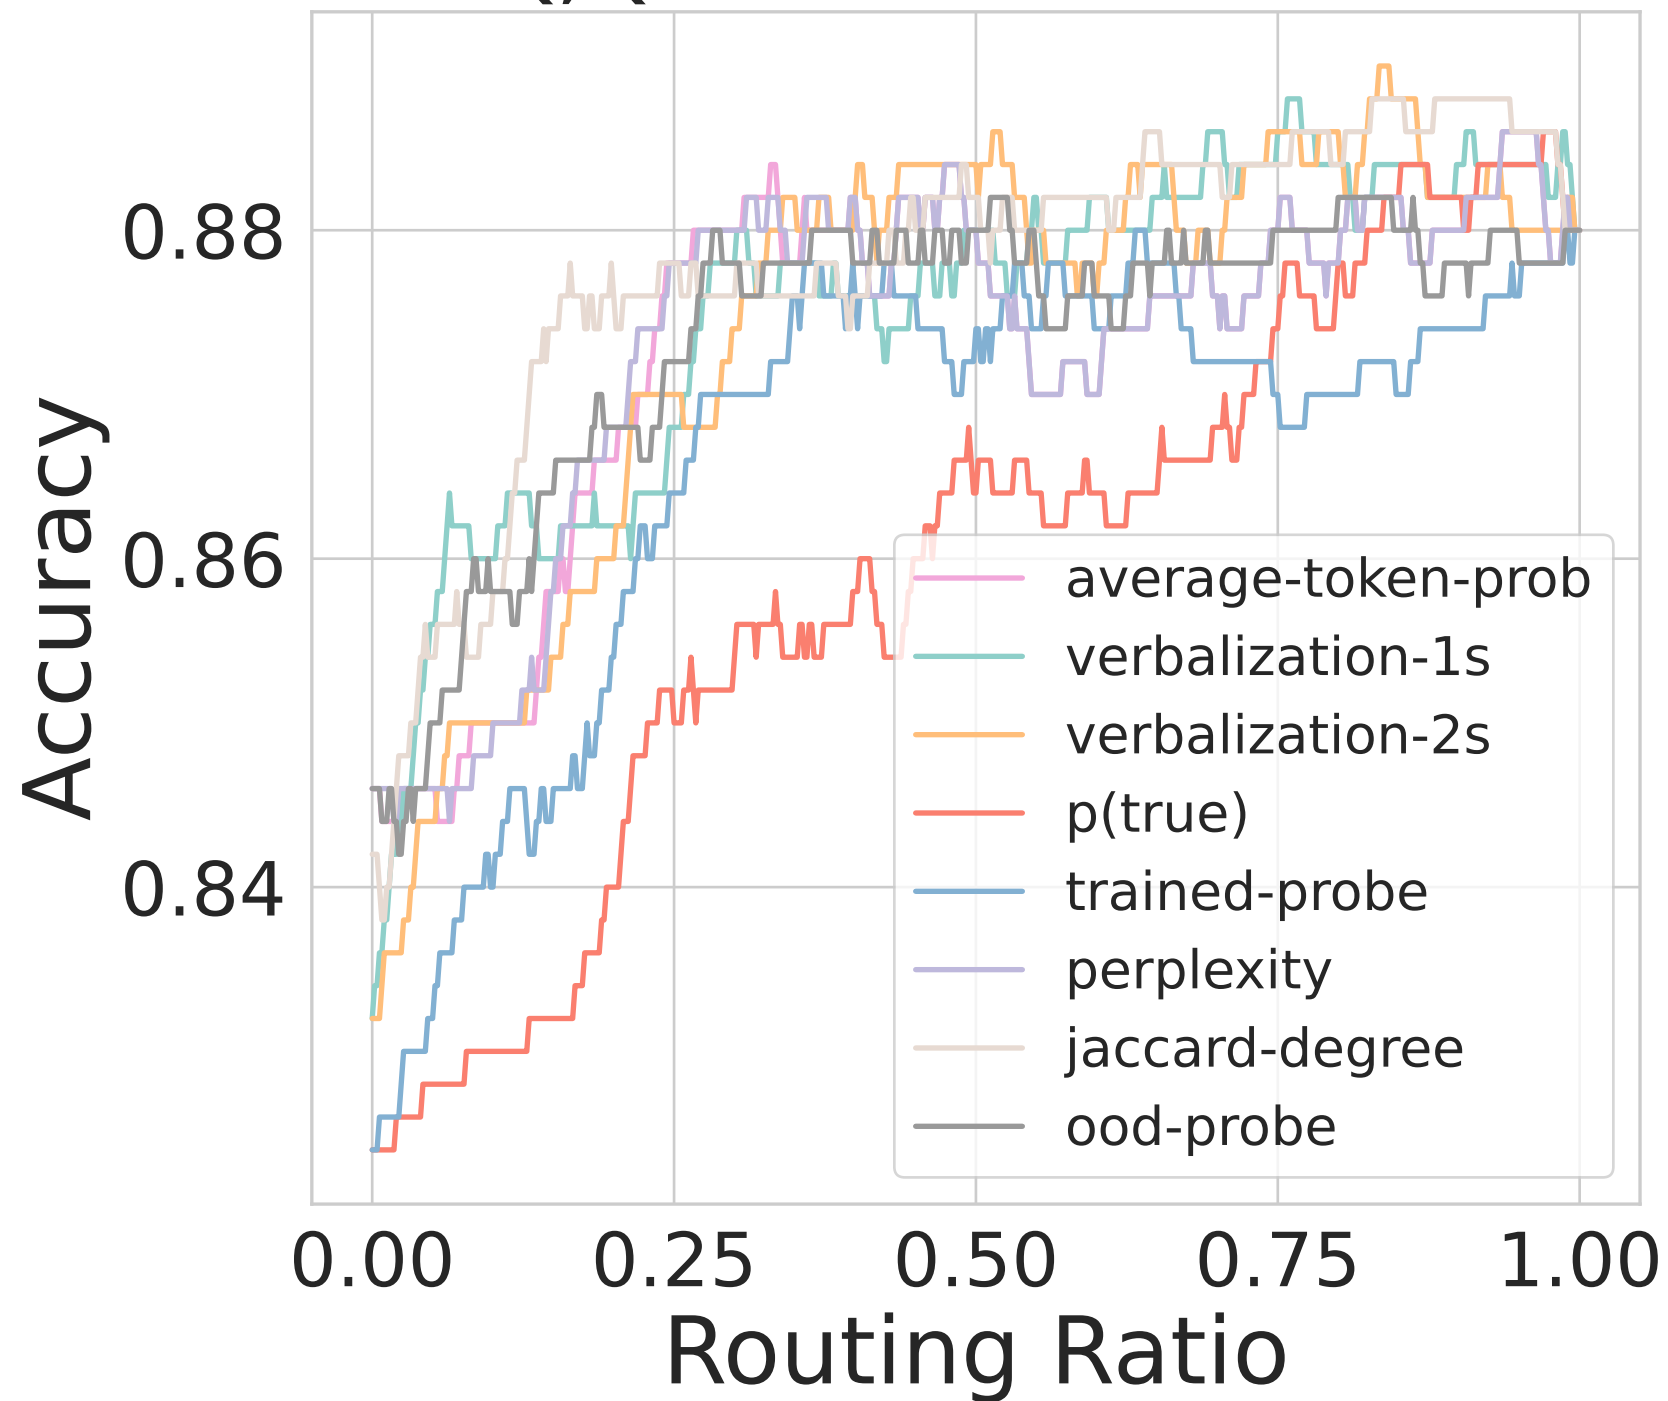

Supplement: supplementary_material [file rr_acc_boolq_Qwen3-1.7B_llama70.pdf › Routing_SLM_LLMs/Uncertainty-based Routing/w_legend/to_llama70/rr_acc_boolq_Qwen3-1.7B_llama70.pdf]

# BoolQ, Qwen3-4B to Llama-3.1-70B

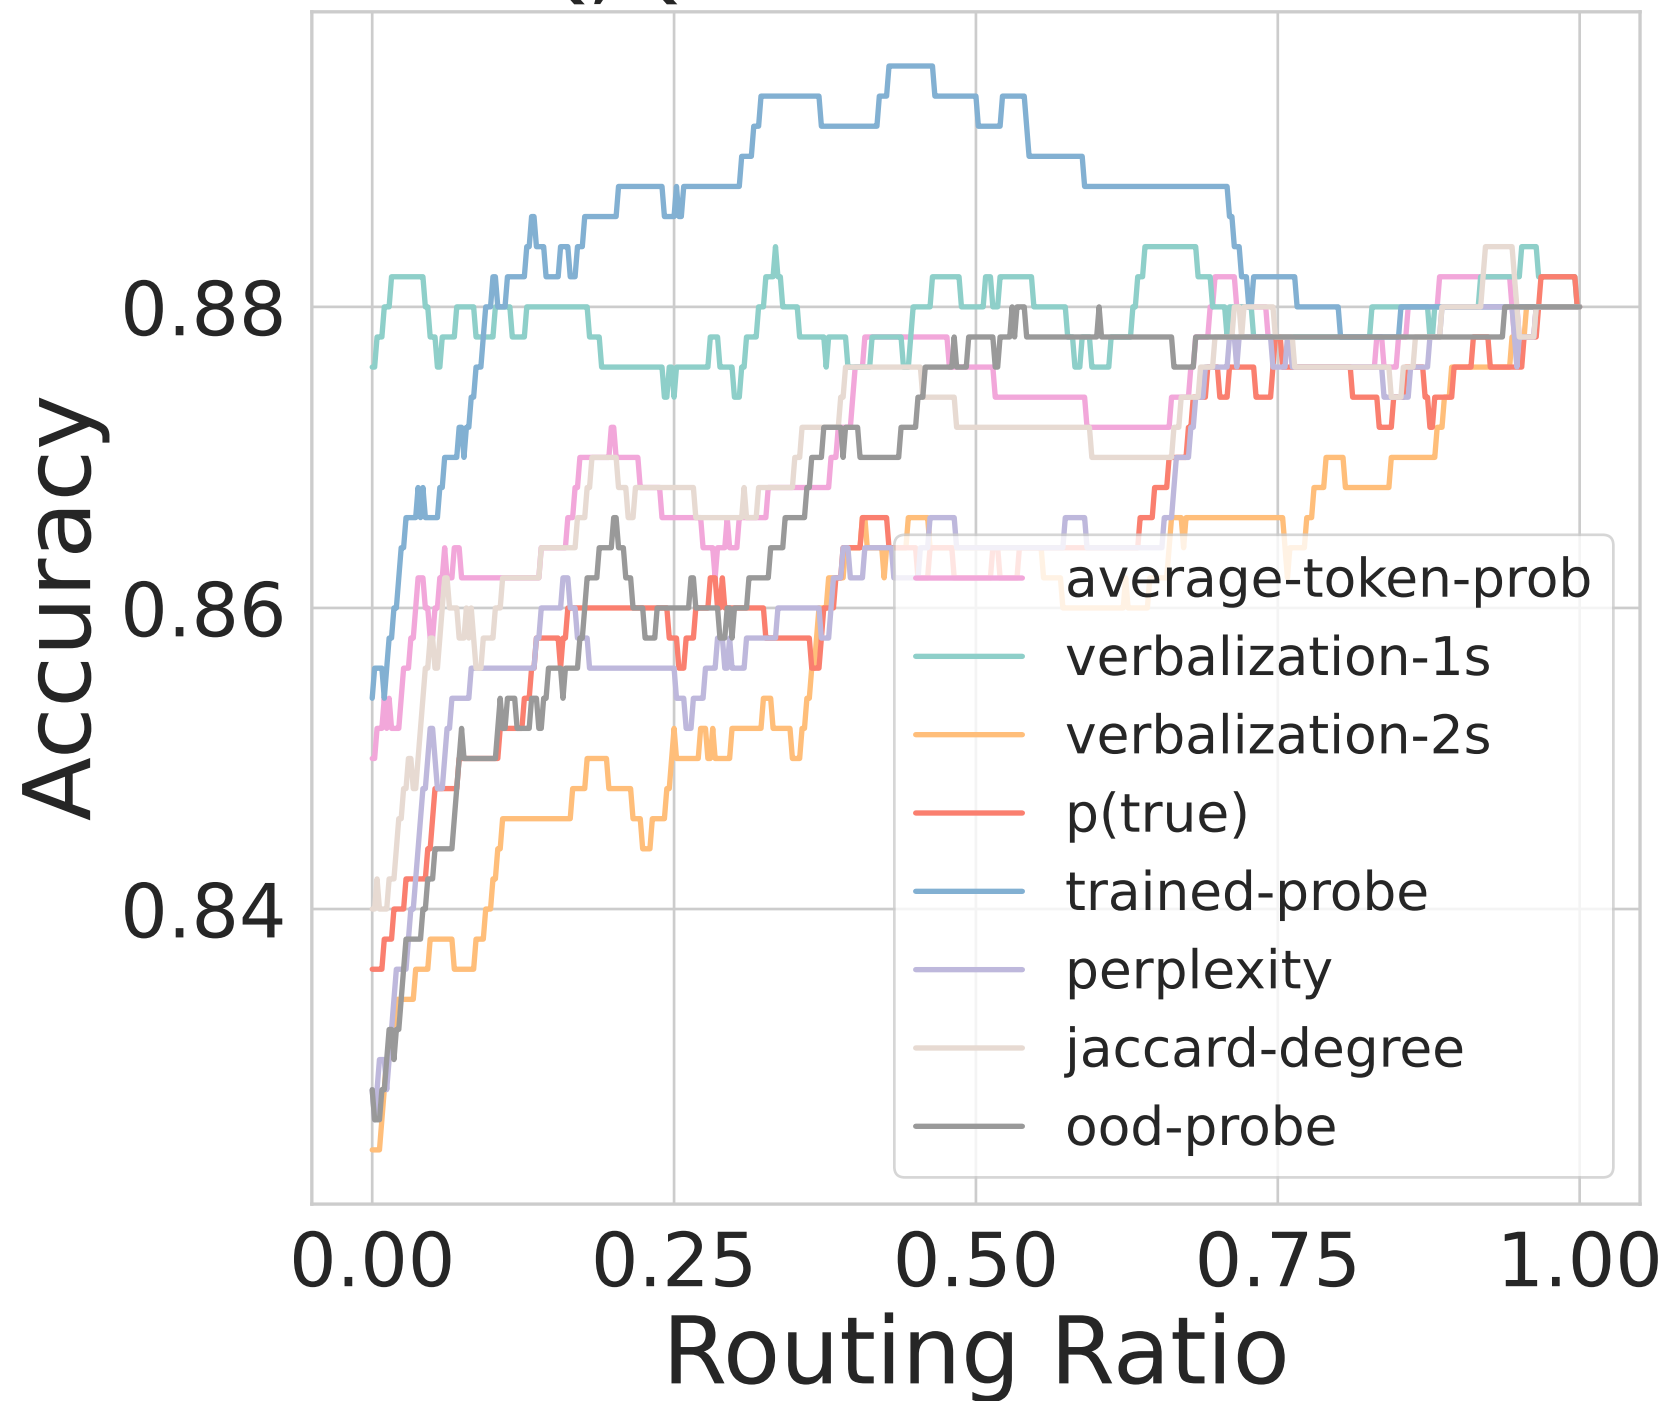

Supplement: supplementary_material [file rr_acc_boolq_Qwen3-4B_llama70.pdf › Routing_SLM_LLMs/Uncertainty-based Routing/w_legend/to_llama70/rr_acc_boolq_Qwen3-4B_llama70.pdf]

# BoolQ, granite-3.1-8b to Llama-3.1-70B

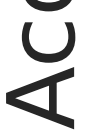

Supplement: supplementary_material [file rr_acc_boolq_granite-3.1-8b_llama70.pdf › Routing_SLM_LLMs/Uncertainty-based Routing/w_legend/to_llama70/rr_acc_boolq_granite-3.1-8b_llama70.pdf]

**BoolQ, llama-3.1-8b to Llama-3.1-70B**

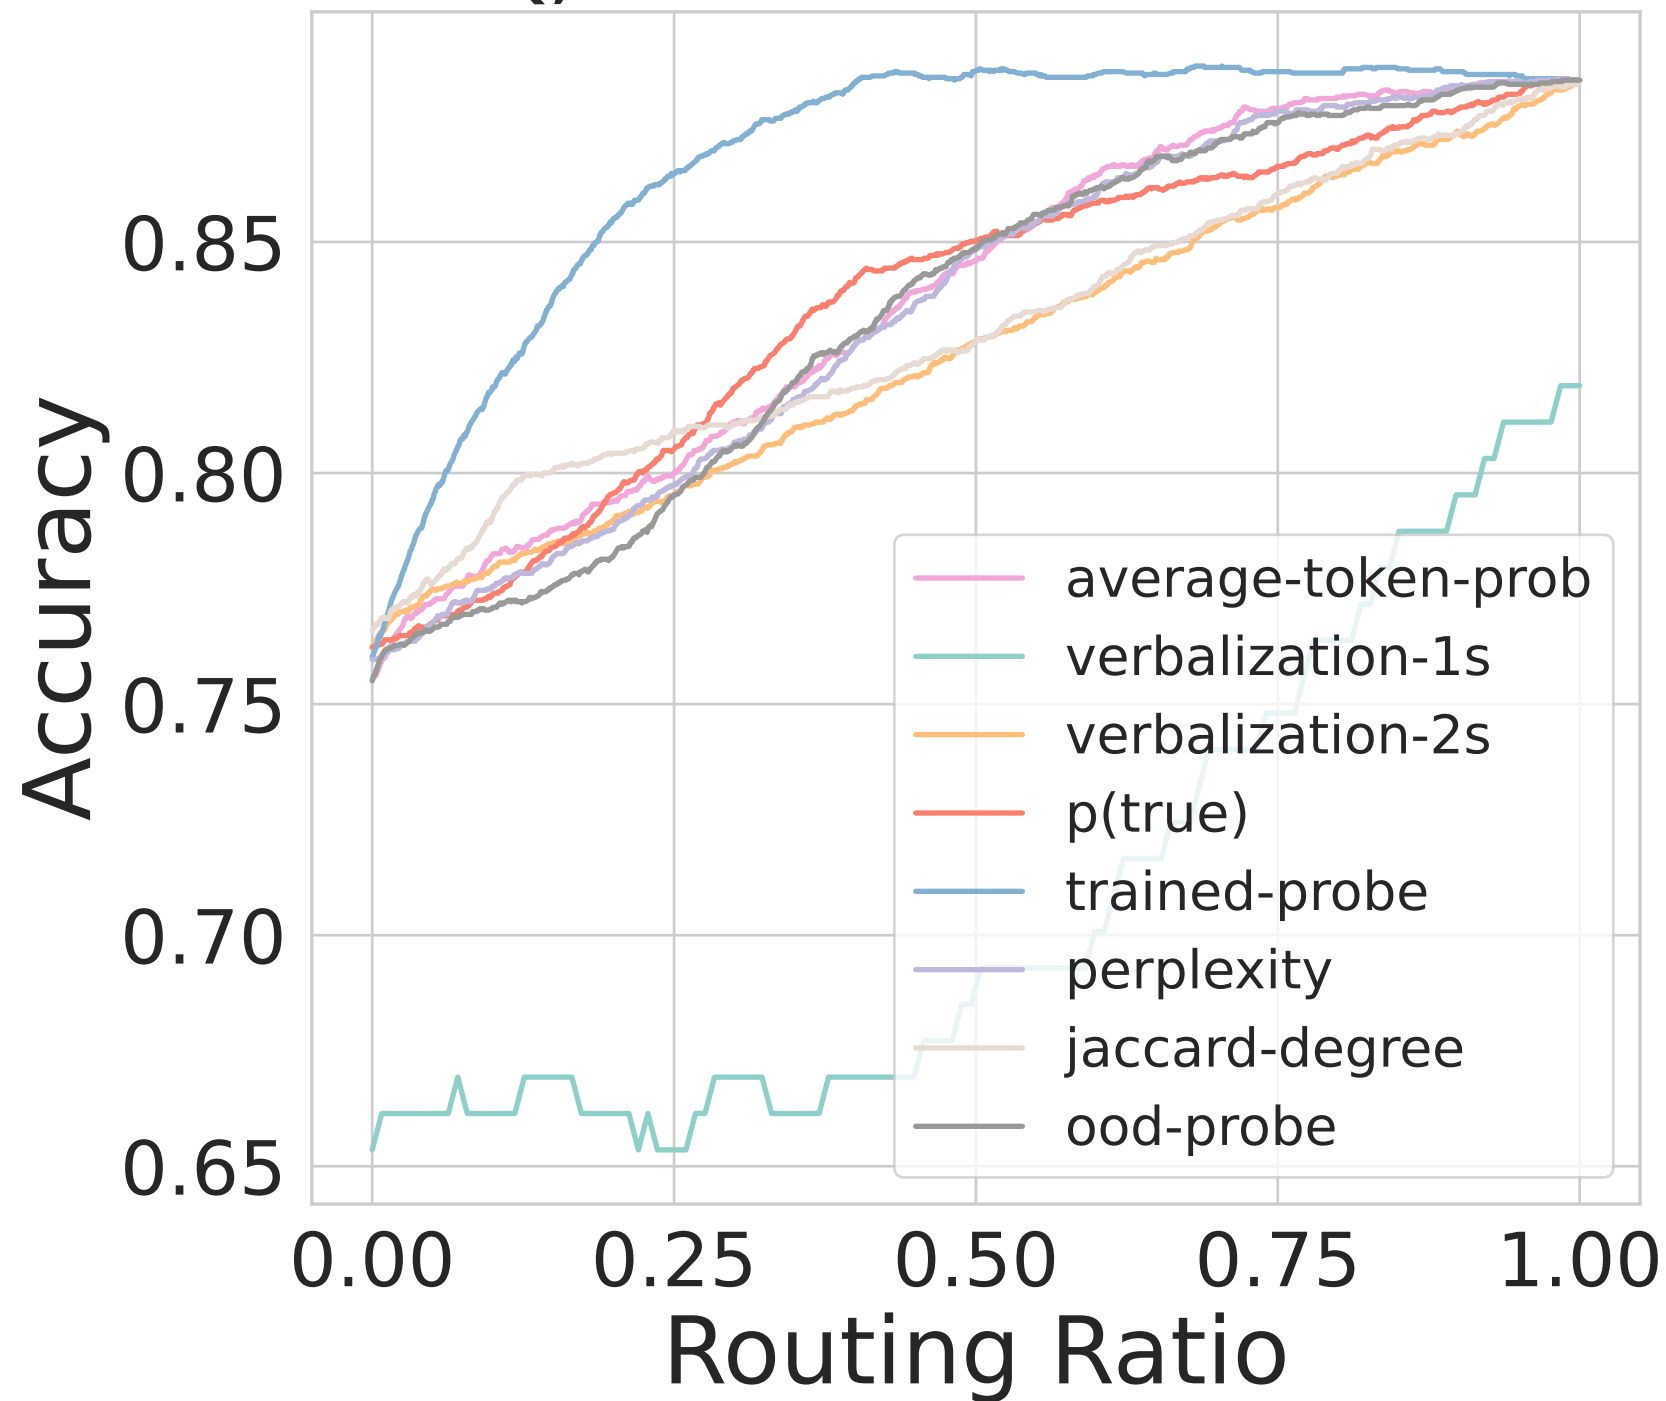

Supplement: supplementary_material [file rr_acc_boolq_llama-3.1-8b_llama70.pdf › Routing_SLM_LLMs/Uncertainty-based Routing/w_legend/to_llama70/rr_acc_boolq_llama-3.1-8b_llama70.pdf]

**BoolQ, llama-3.2-1b to Llama-3.1-70B**

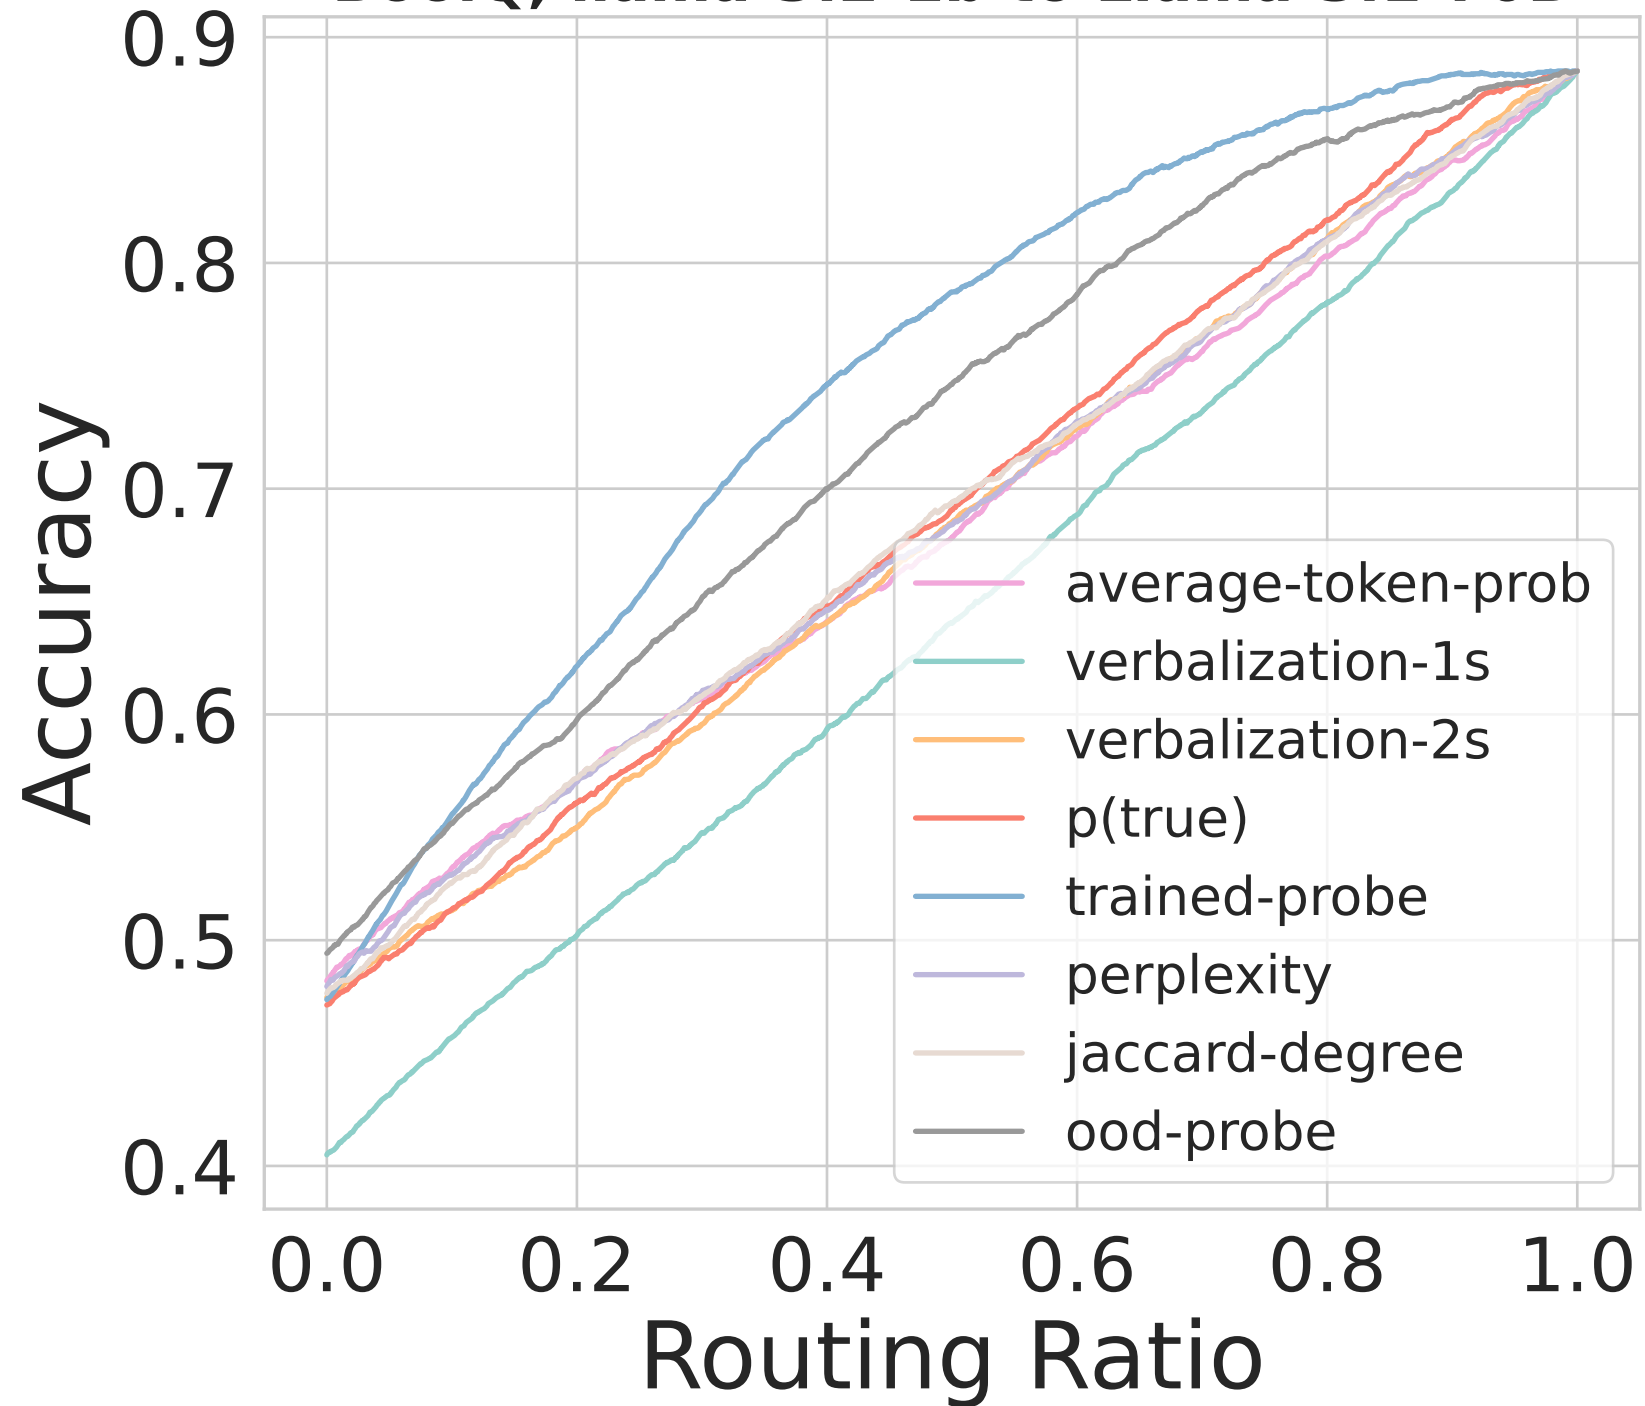

Supplement: supplementary_material [file rr_acc_boolq_llama-3.2-1b_llama70.pdf › Routing_SLM_LLMs/Uncertainty-based Routing/w_legend/to_llama70/rr_acc_boolq_llama-3.2-1b_llama70.pdf]

# BoolQ, llama-3.2-3b to llama-3.1-70B

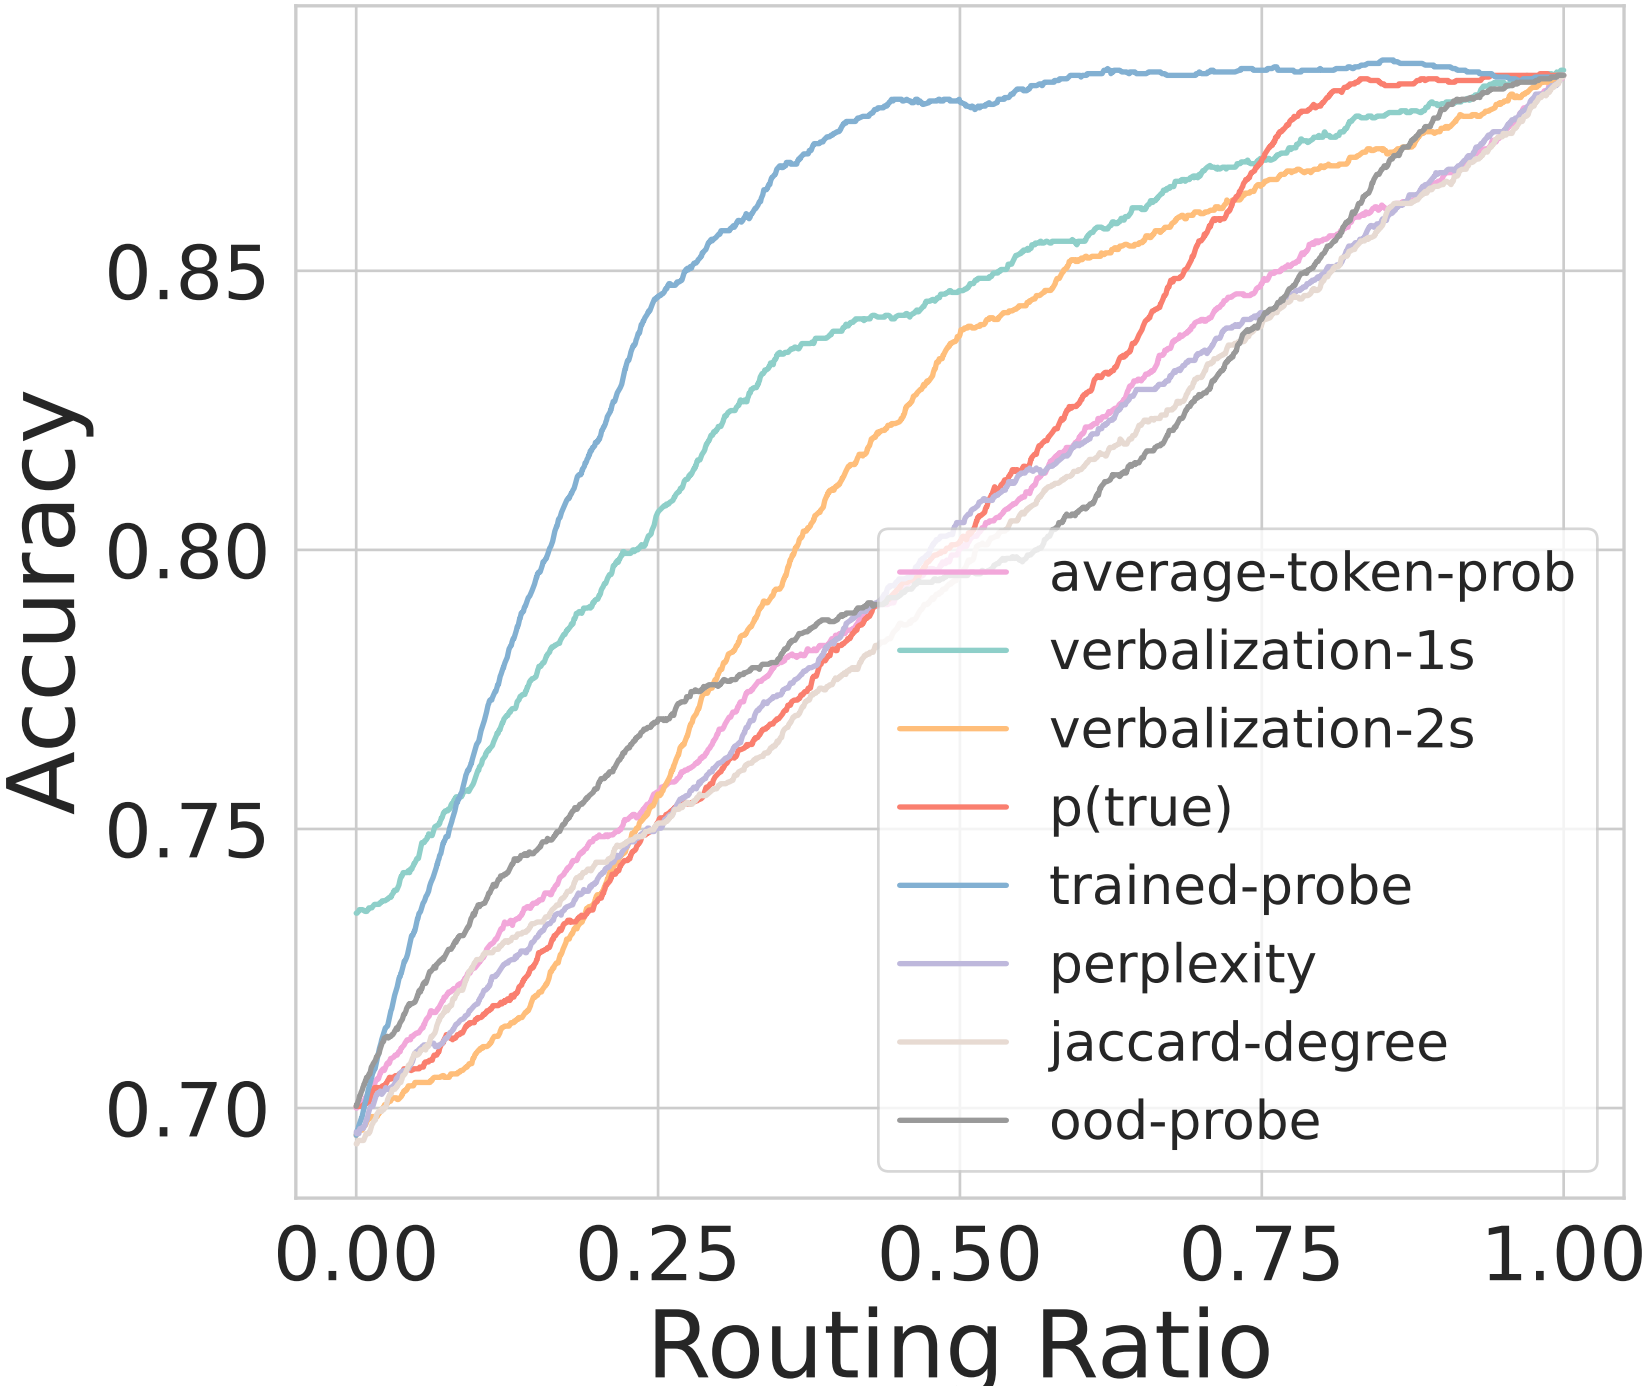

Supplement: supplementary_material [file rr_acc_boolq_llama-3.2-3b_llama70.pdf › Routing_SLM_LLMs/Uncertainty-based Routing/w_legend/to_llama70/rr_acc_boolq_llama-3.2-3b_llama70.pdf]

# BoolQ, mistral-7b to Llama-3.1-70B



Supplement: supplementary_material [file rr_acc_boolq_mistral-7b_llama70.pdf › Routing_SLM_LLMs/Uncertainty-based Routing/w_legend/to_llama70/rr_acc_boolq_mistral-7b_llama70.pdf]

# BoolQ, phi-3.5-mini to Llama-3.1-70B

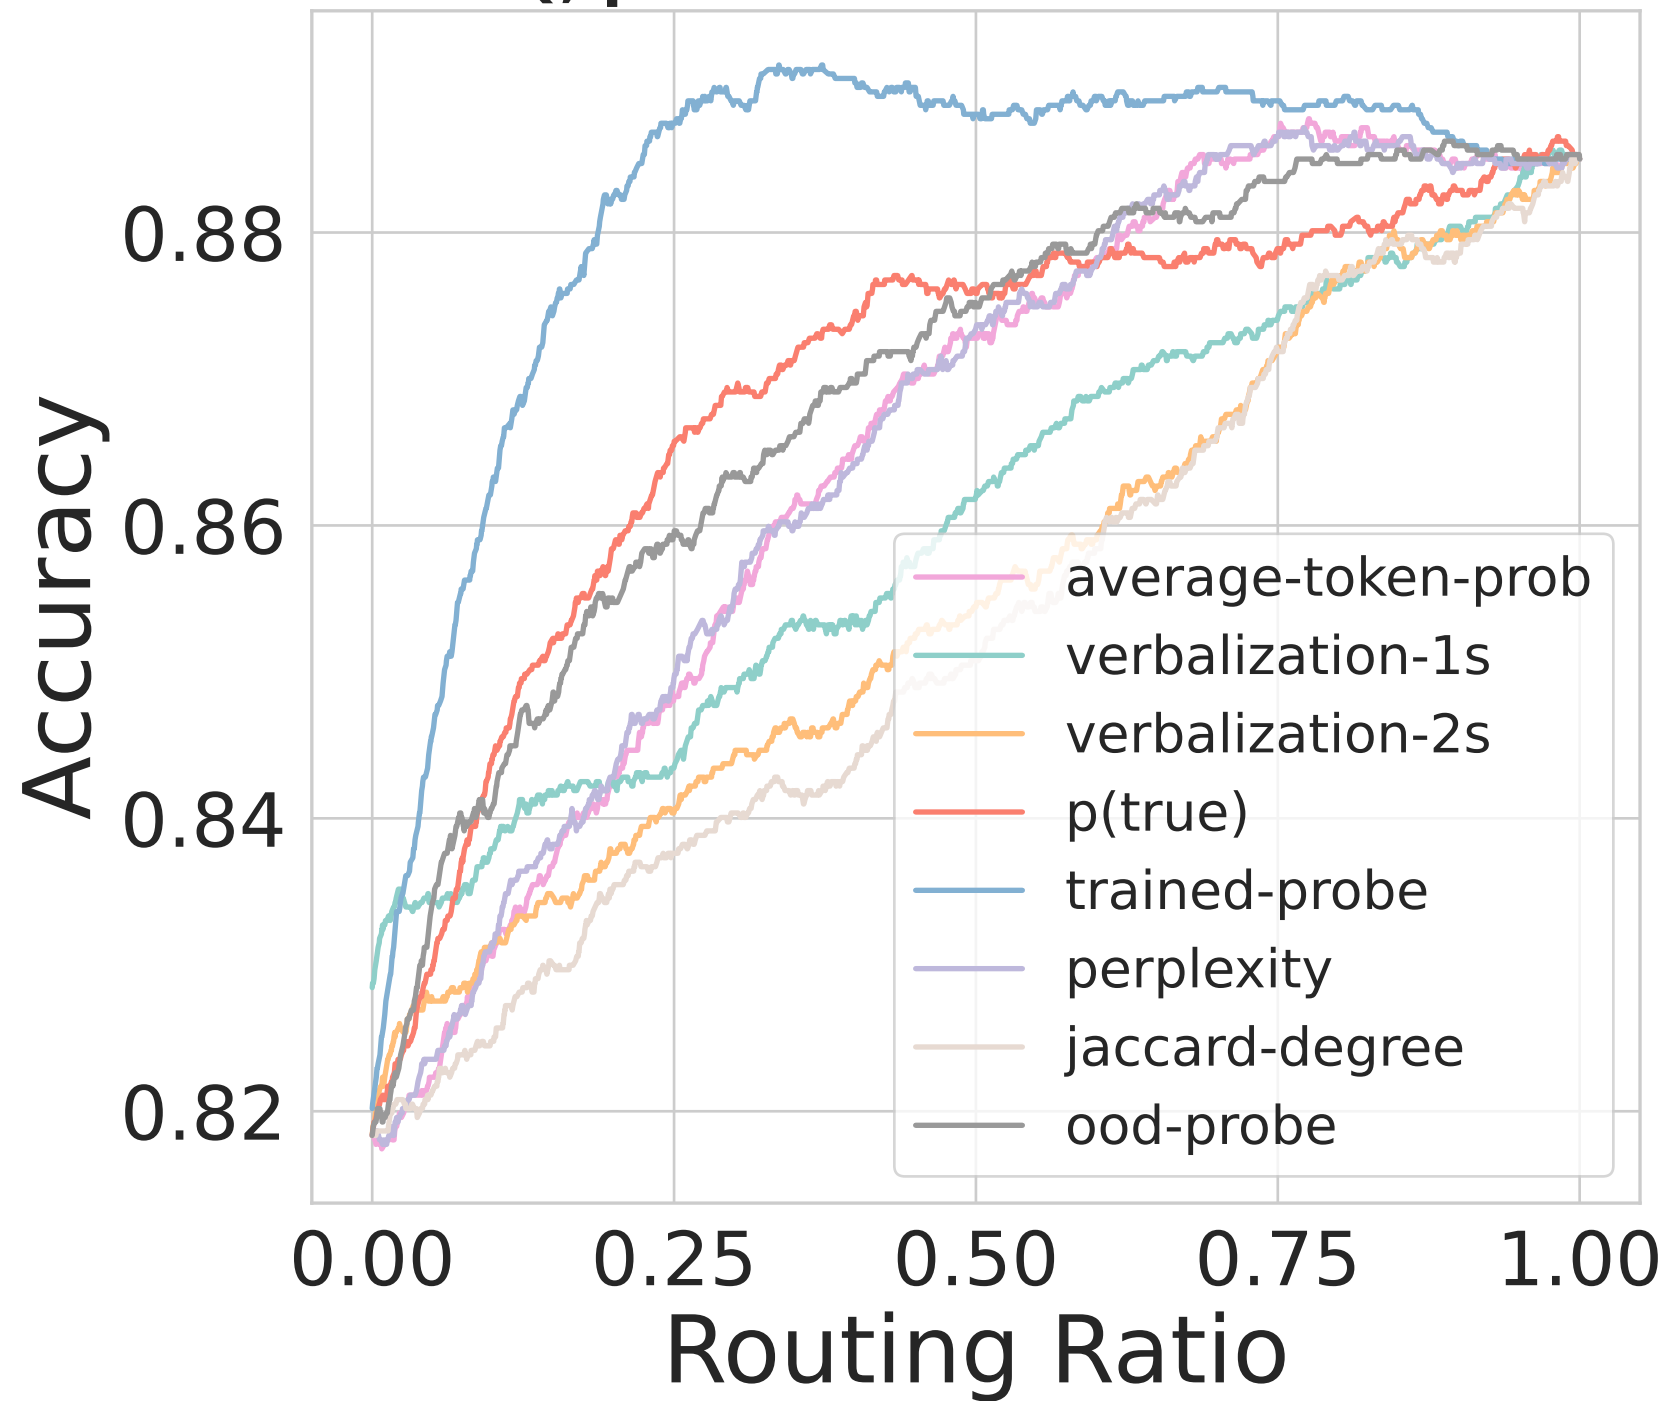

Supplement: supplementary_material [file rr_acc_boolq_phi-3.5-mini_llama70.pdf › Routing_SLM_LLMs/Uncertainty-based Routing/w_legend/to_llama70/rr_acc_boolq_phi-3.5-mini_llama70.pdf]

# BoolQ, gwen-2.5-7b to Llama-3.1-70B

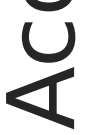

Supplement: supplementary_material [file rr_acc_boolq_qwen-2.5-7b_llama70.pdf › Routing_SLM_LLMs/Uncertainty-based Routing/w_legend/to_llama70/rr_acc_boolq_qwen-2.5-7b_llama70.pdf]

# BoolQ, rwkv to Llama-3.1-70B

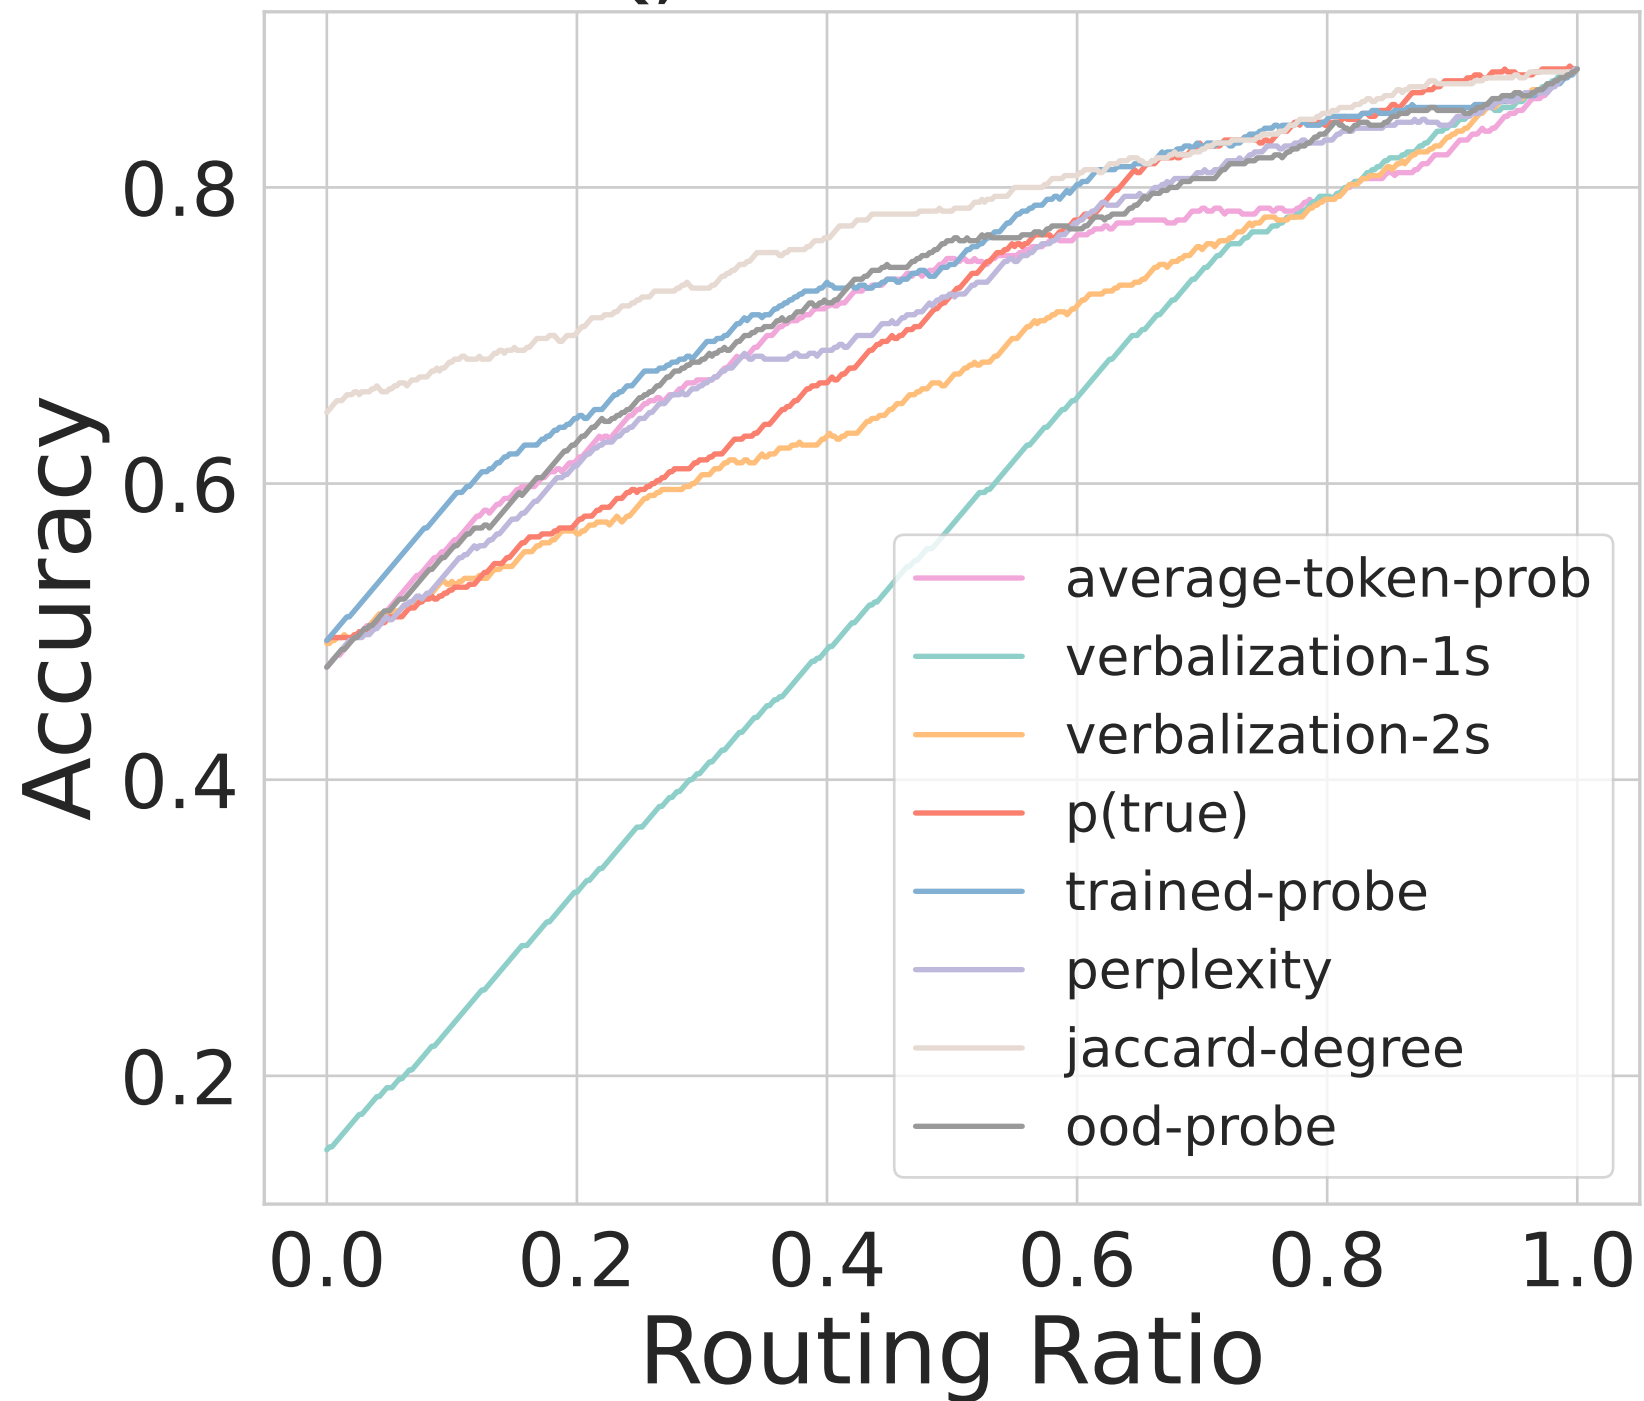

Supplement: supplementary_material [file rr_acc_boolq_rwkv_llama70.pdf › Routing_SLM_LLMs/Uncertainty-based Routing/w_legend/to_llama70/rr_acc_boolq_rwkv_llama70.pdf]

# CoQA, Qwen3-0.6B to Llama-3.1-70B

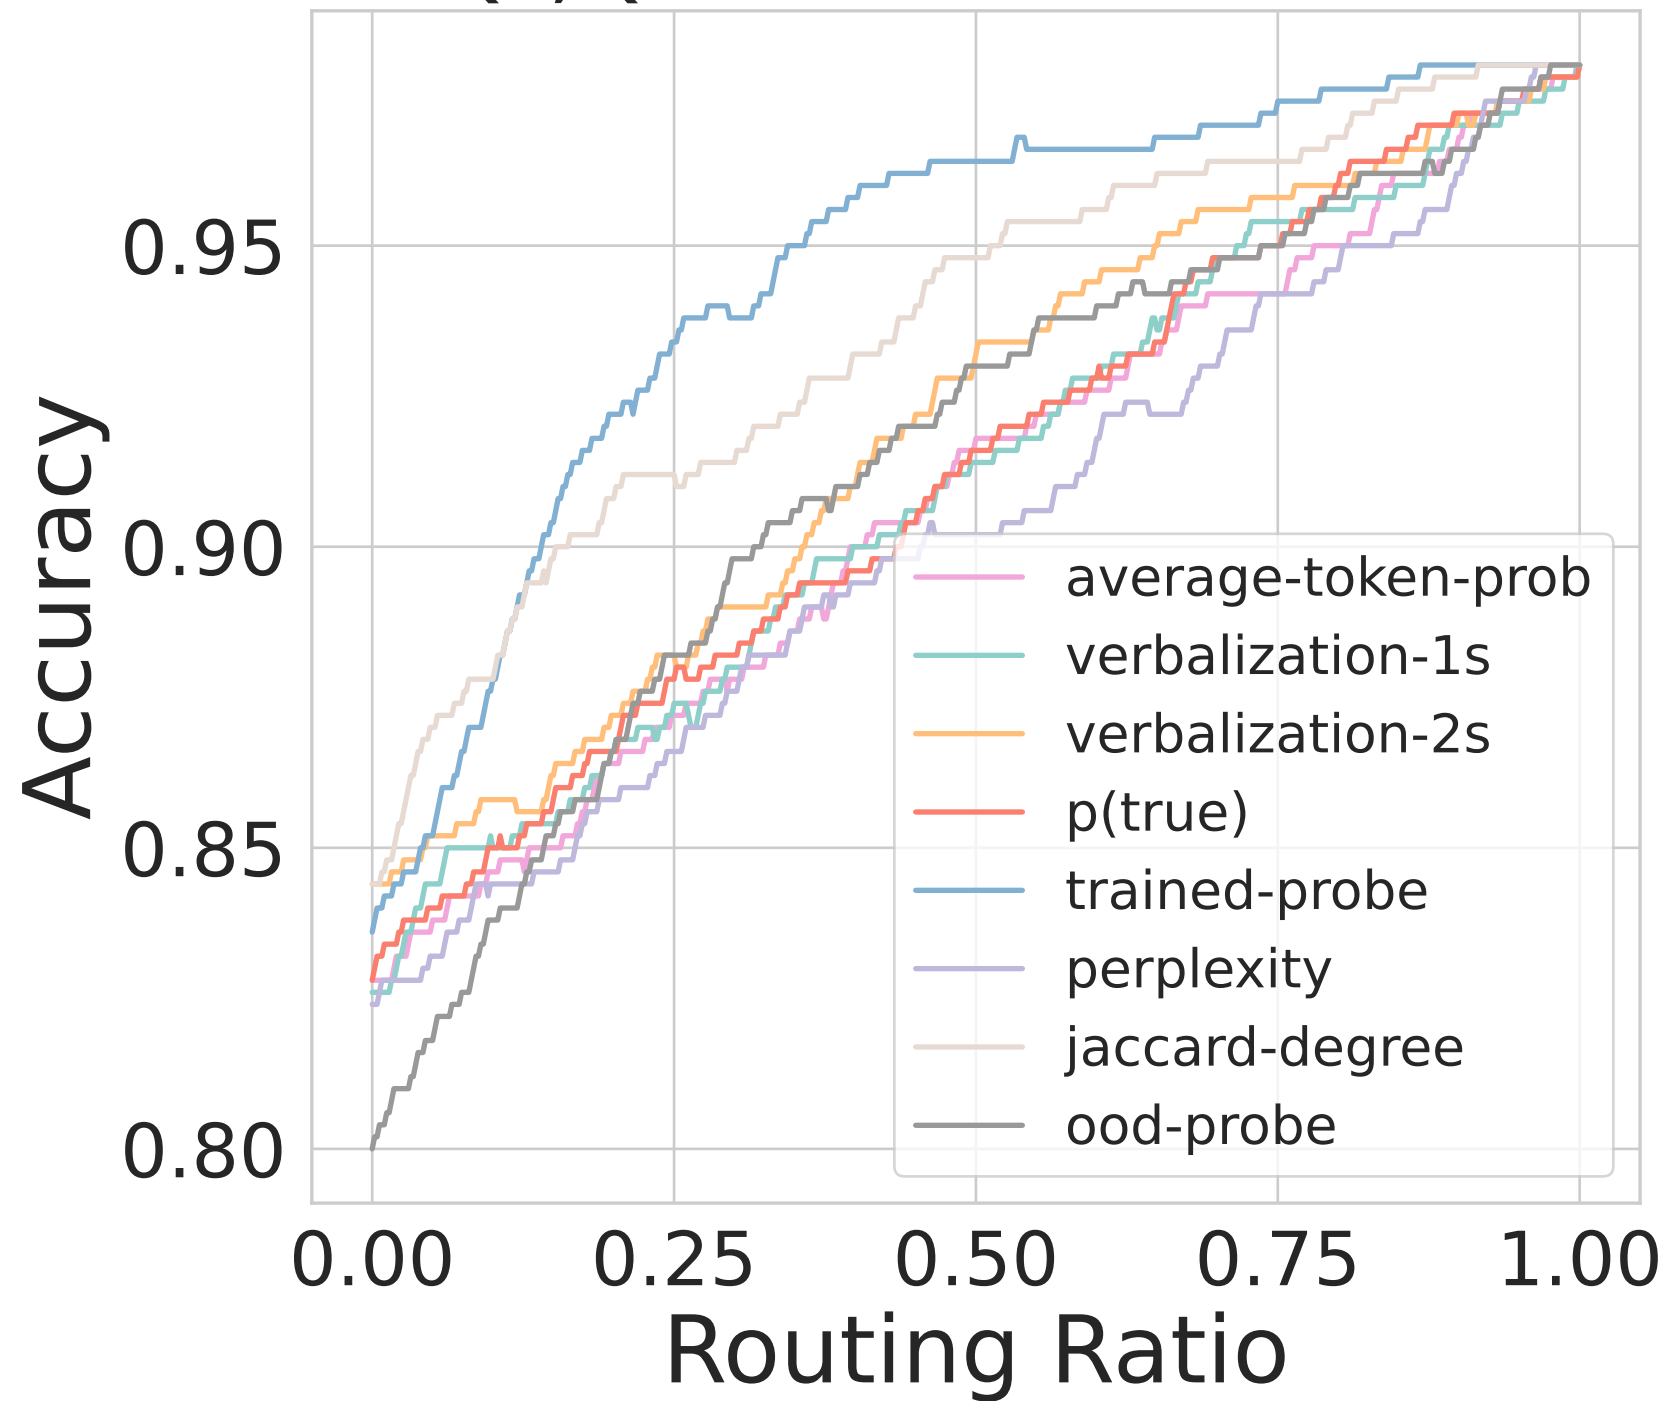

Supplement: supplementary_material [file rr_acc_co_qa_Qwen3-0.6B_llama70.pdf › Routing_SLM_LLMs/Uncertainty-based Routing/w_legend/to_llama70/rr_acc_co_qa_Qwen3-0.6B_llama70.pdf]

# CoQA, Qwen3-1.7B to Llama-3.1-70B

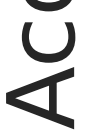

Supplement: supplementary_material [file rr_acc_co_qa_Qwen3-1.7B_llama70.pdf › Routing_SLM_LLMs/Uncertainty-based Routing/w_legend/to_llama70/rr_acc_co_qa_Qwen3-1.7B_llama70.pdf]

**CoQA, Qwen3-4B to Llama-3.1-70B**

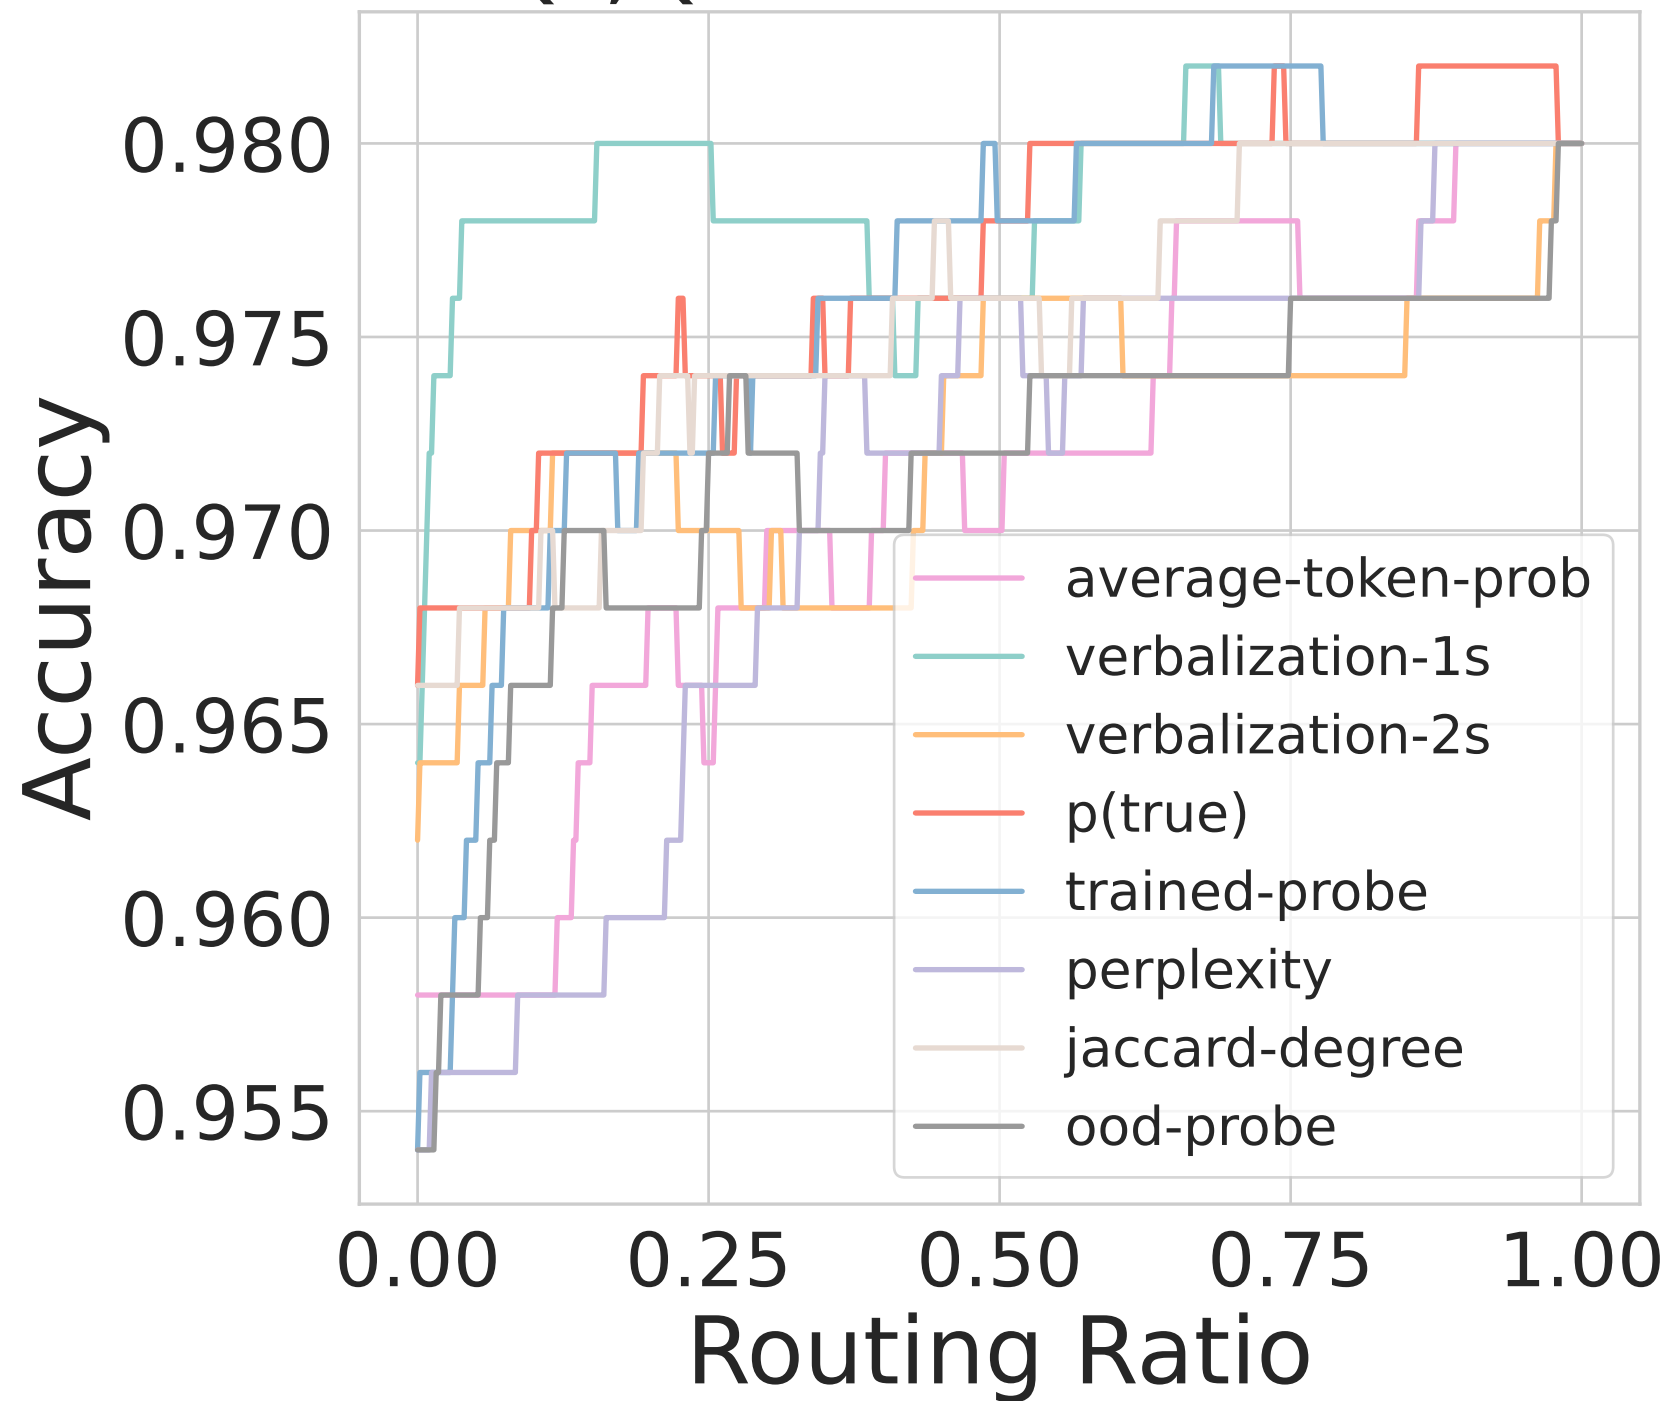

Supplement: supplementary_material [file rr_acc_co_qa_Qwen3-4B_llama70.pdf › Routing_SLM_LLMs/Uncertainty-based Routing/w_legend/to_llama70/rr_acc_co_qa_Qwen3-4B_llama70.pdf]

# CoQA, granite-3.1-8b to Llama-3.1-70B

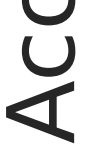

ood proba

Supplement: supplementary_material [file rr_acc_co_qa_granite-3.1-8b_llama70.pdf › Routing_SLM_LLMs/Uncertainty-based Routing/w_legend/to_llama70/rr_acc_co_qa_granite-3.1-8b_llama70.pdf]

**CoQA, llama-3.1-8b to Llama-3.1-70B**

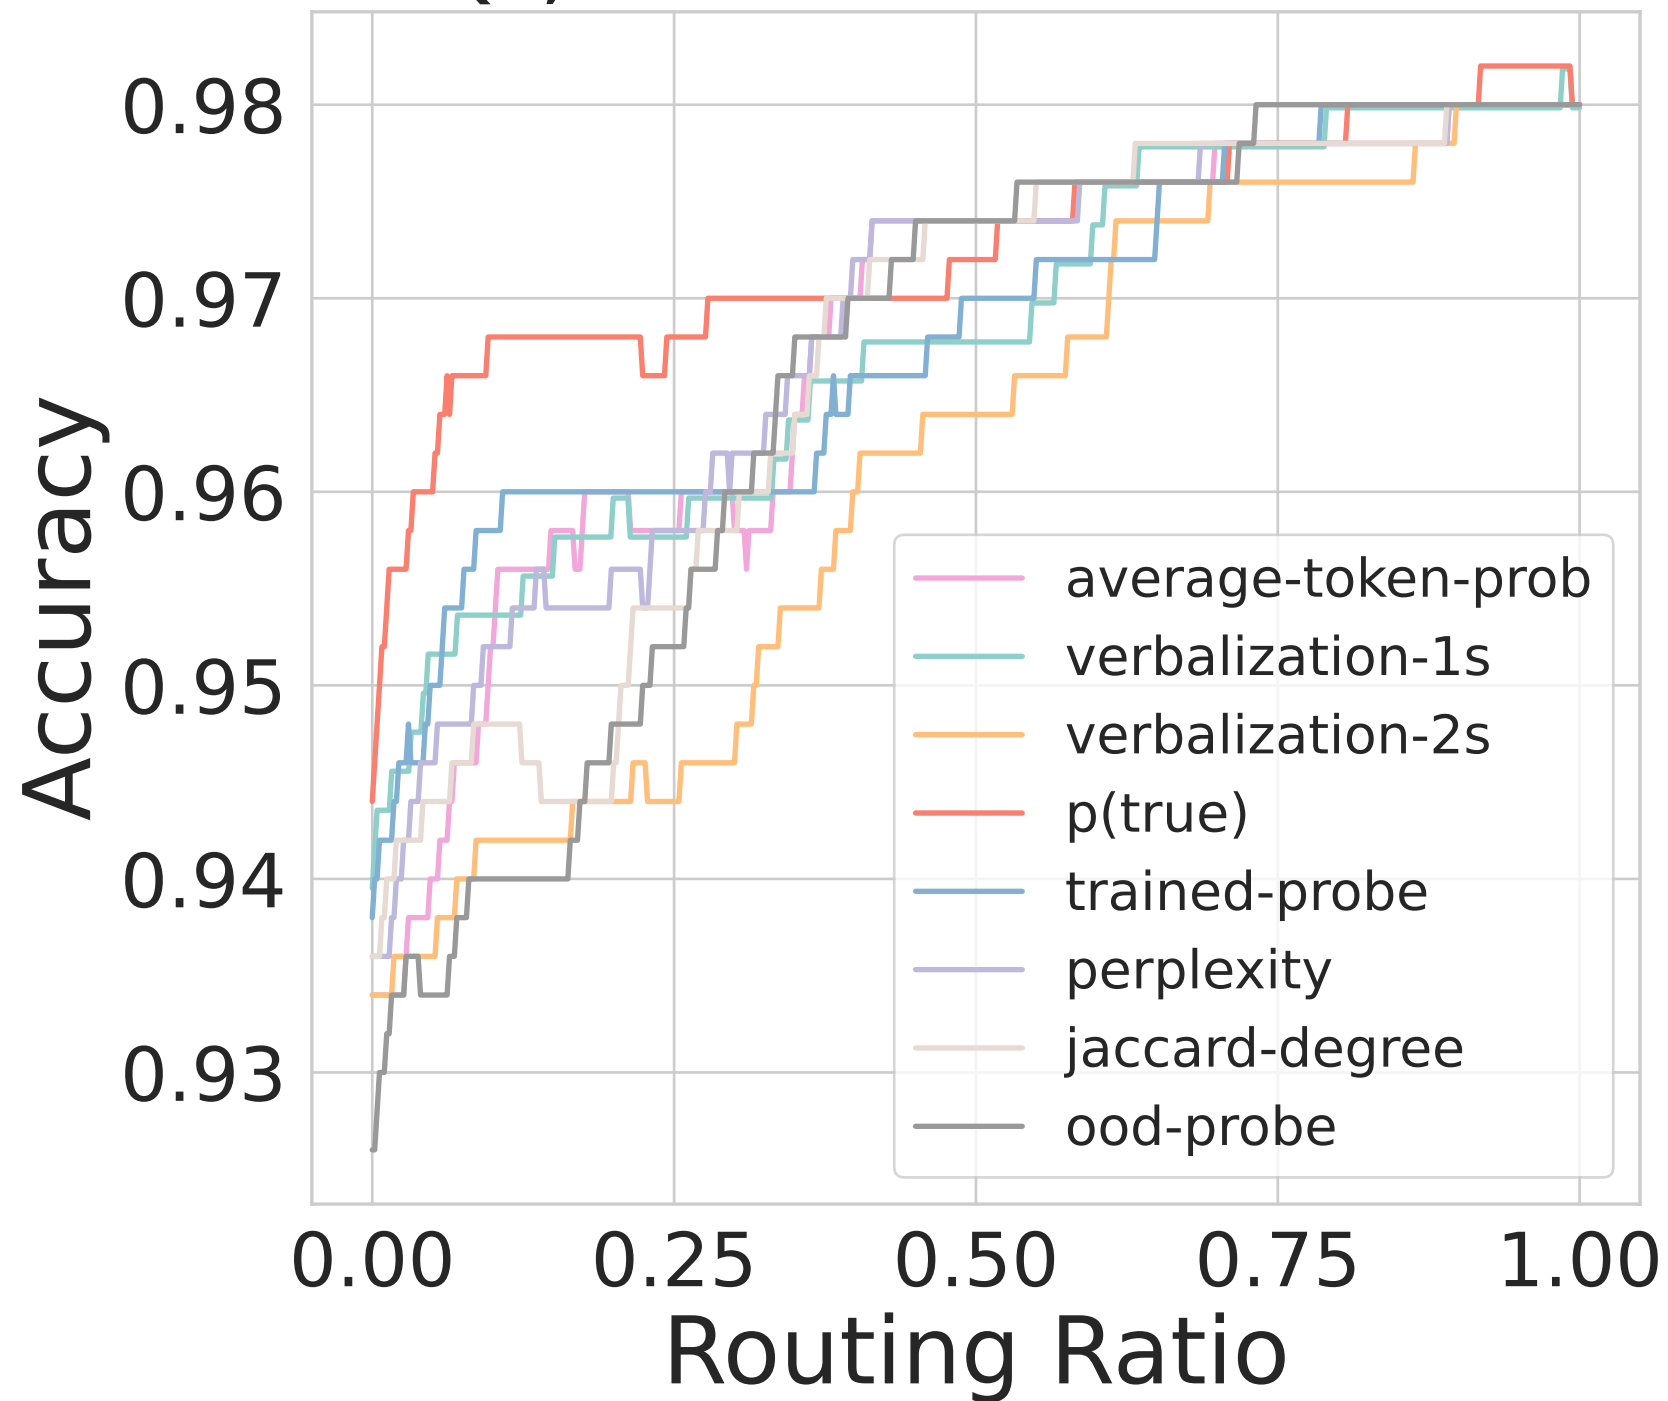

Supplement: supplementary_material [file rr_acc_co_qa_llama-3.1-8b_llama70.pdf › Routing_SLM_LLMs/Uncertainty-based Routing/w_legend/to_llama70/rr_acc_co_qa_llama-3.1-8b_llama70.pdf]

# CoQA, llama-3.2-1b to Llama-3.1-70B

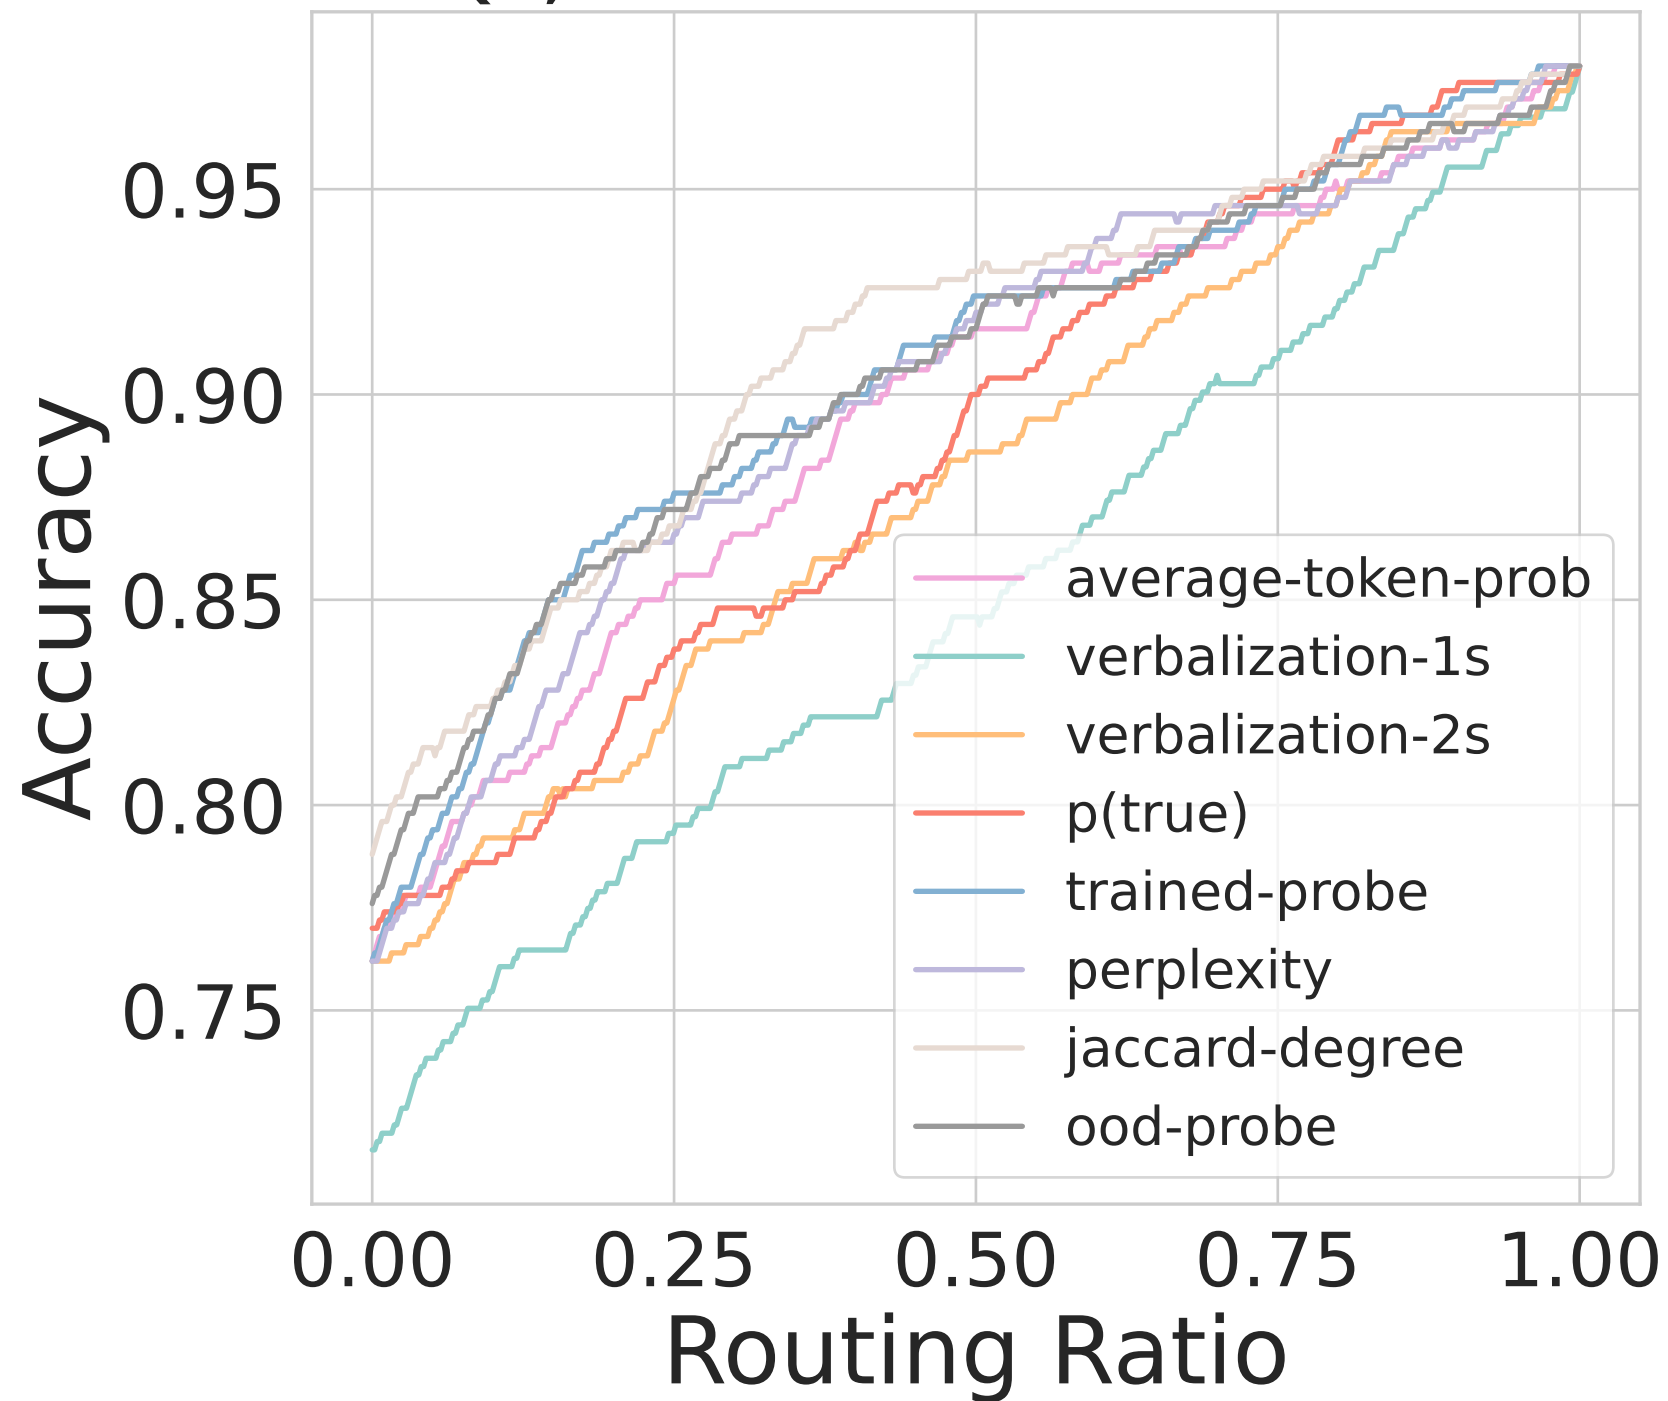

Supplement: supplementary_material [file rr_acc_co_qa_llama-3.2-1b_llama70.pdf › Routing_SLM_LLMs/Uncertainty-based Routing/w_legend/to_llama70/rr_acc_co_qa_llama-3.2-1b_llama70.pdf]

# CoQA, llama-3.2-3b to Llama-3.1-70B

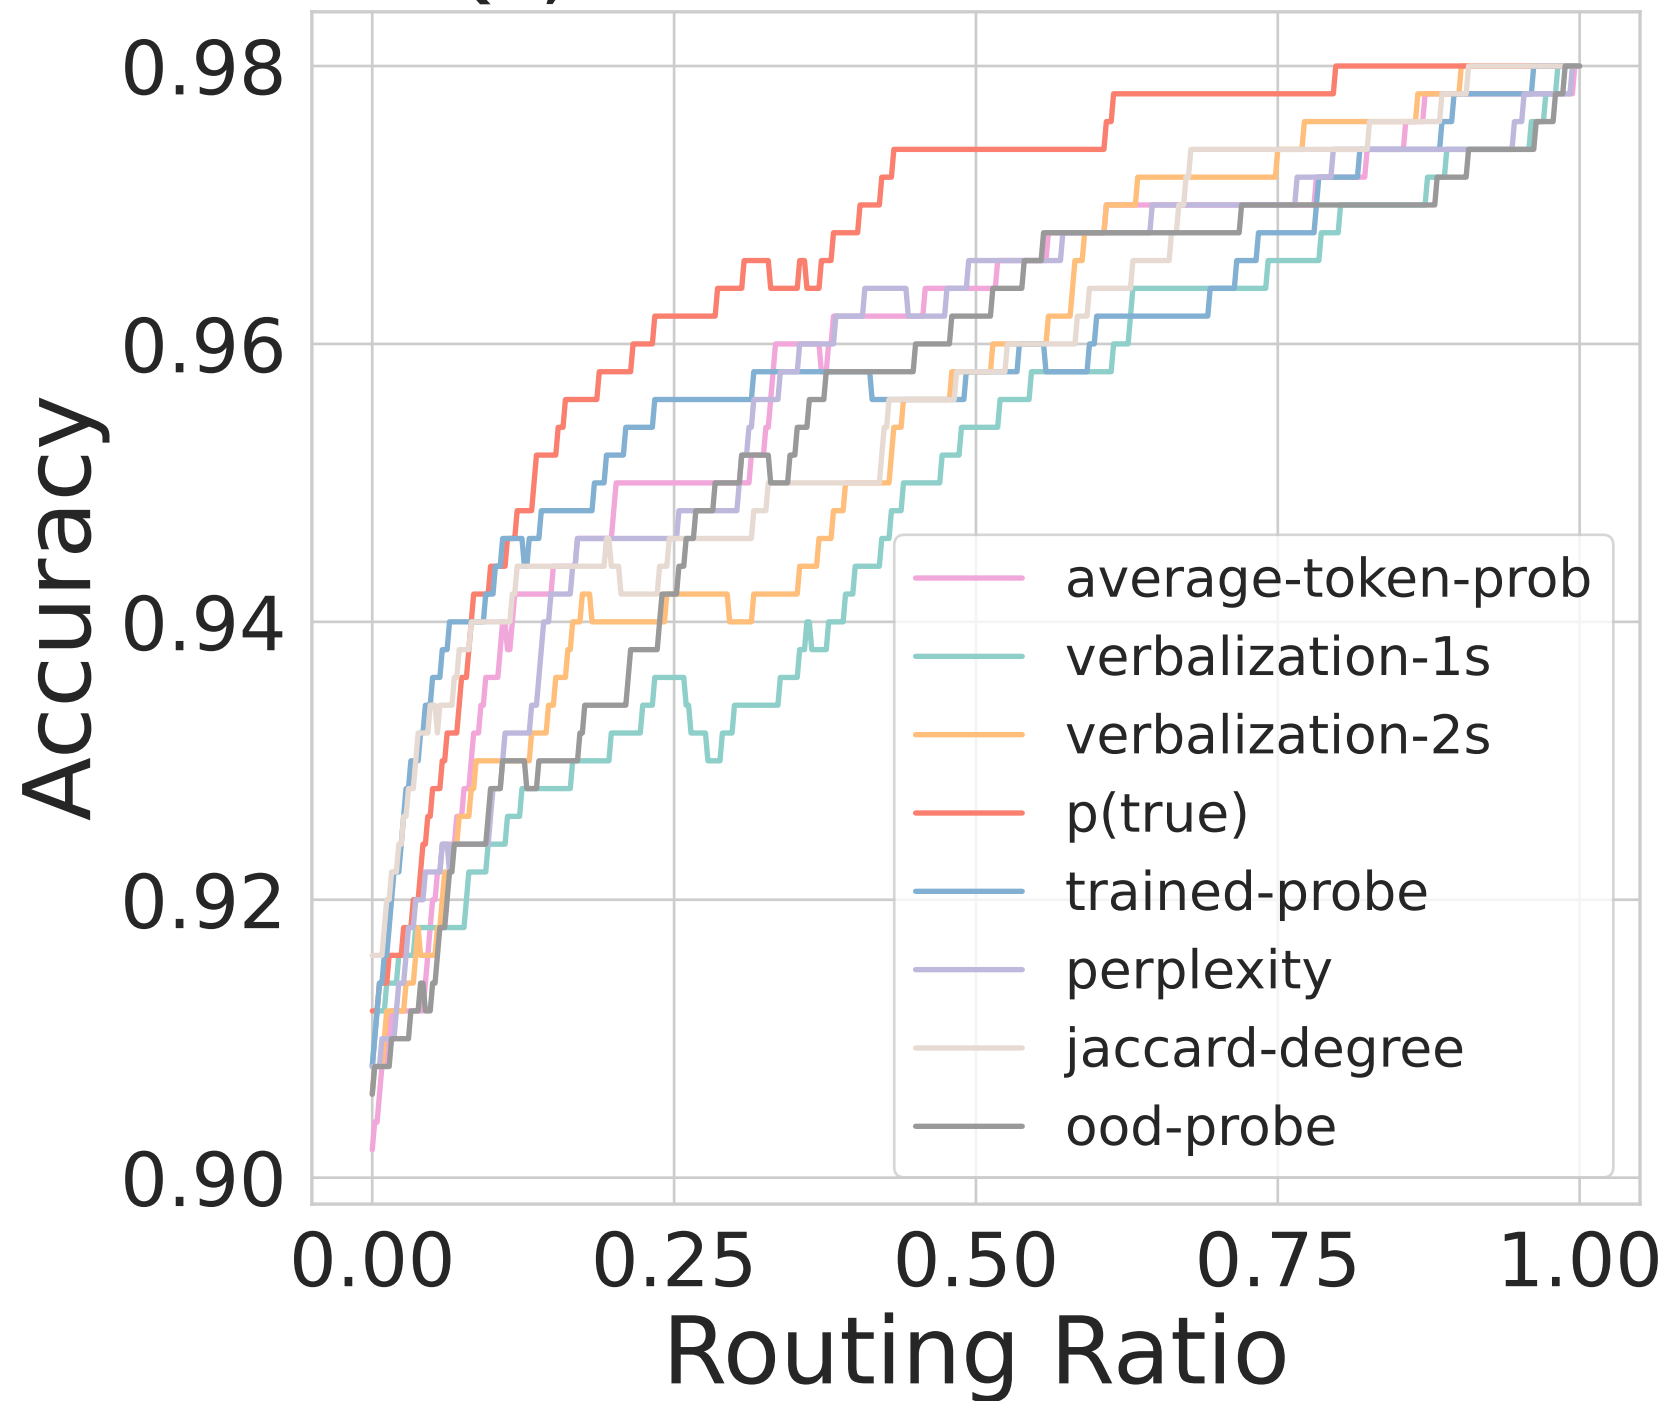

Supplement: supplementary_material [file rr_acc_co_qa_llama-3.2-3b_llama70.pdf › Routing_SLM_LLMs/Uncertainty-based Routing/w_legend/to_llama70/rr_acc_co_qa_llama-3.2-3b_llama70.pdf]

# CoQA, mistral-7b to Llama-3.1-70B

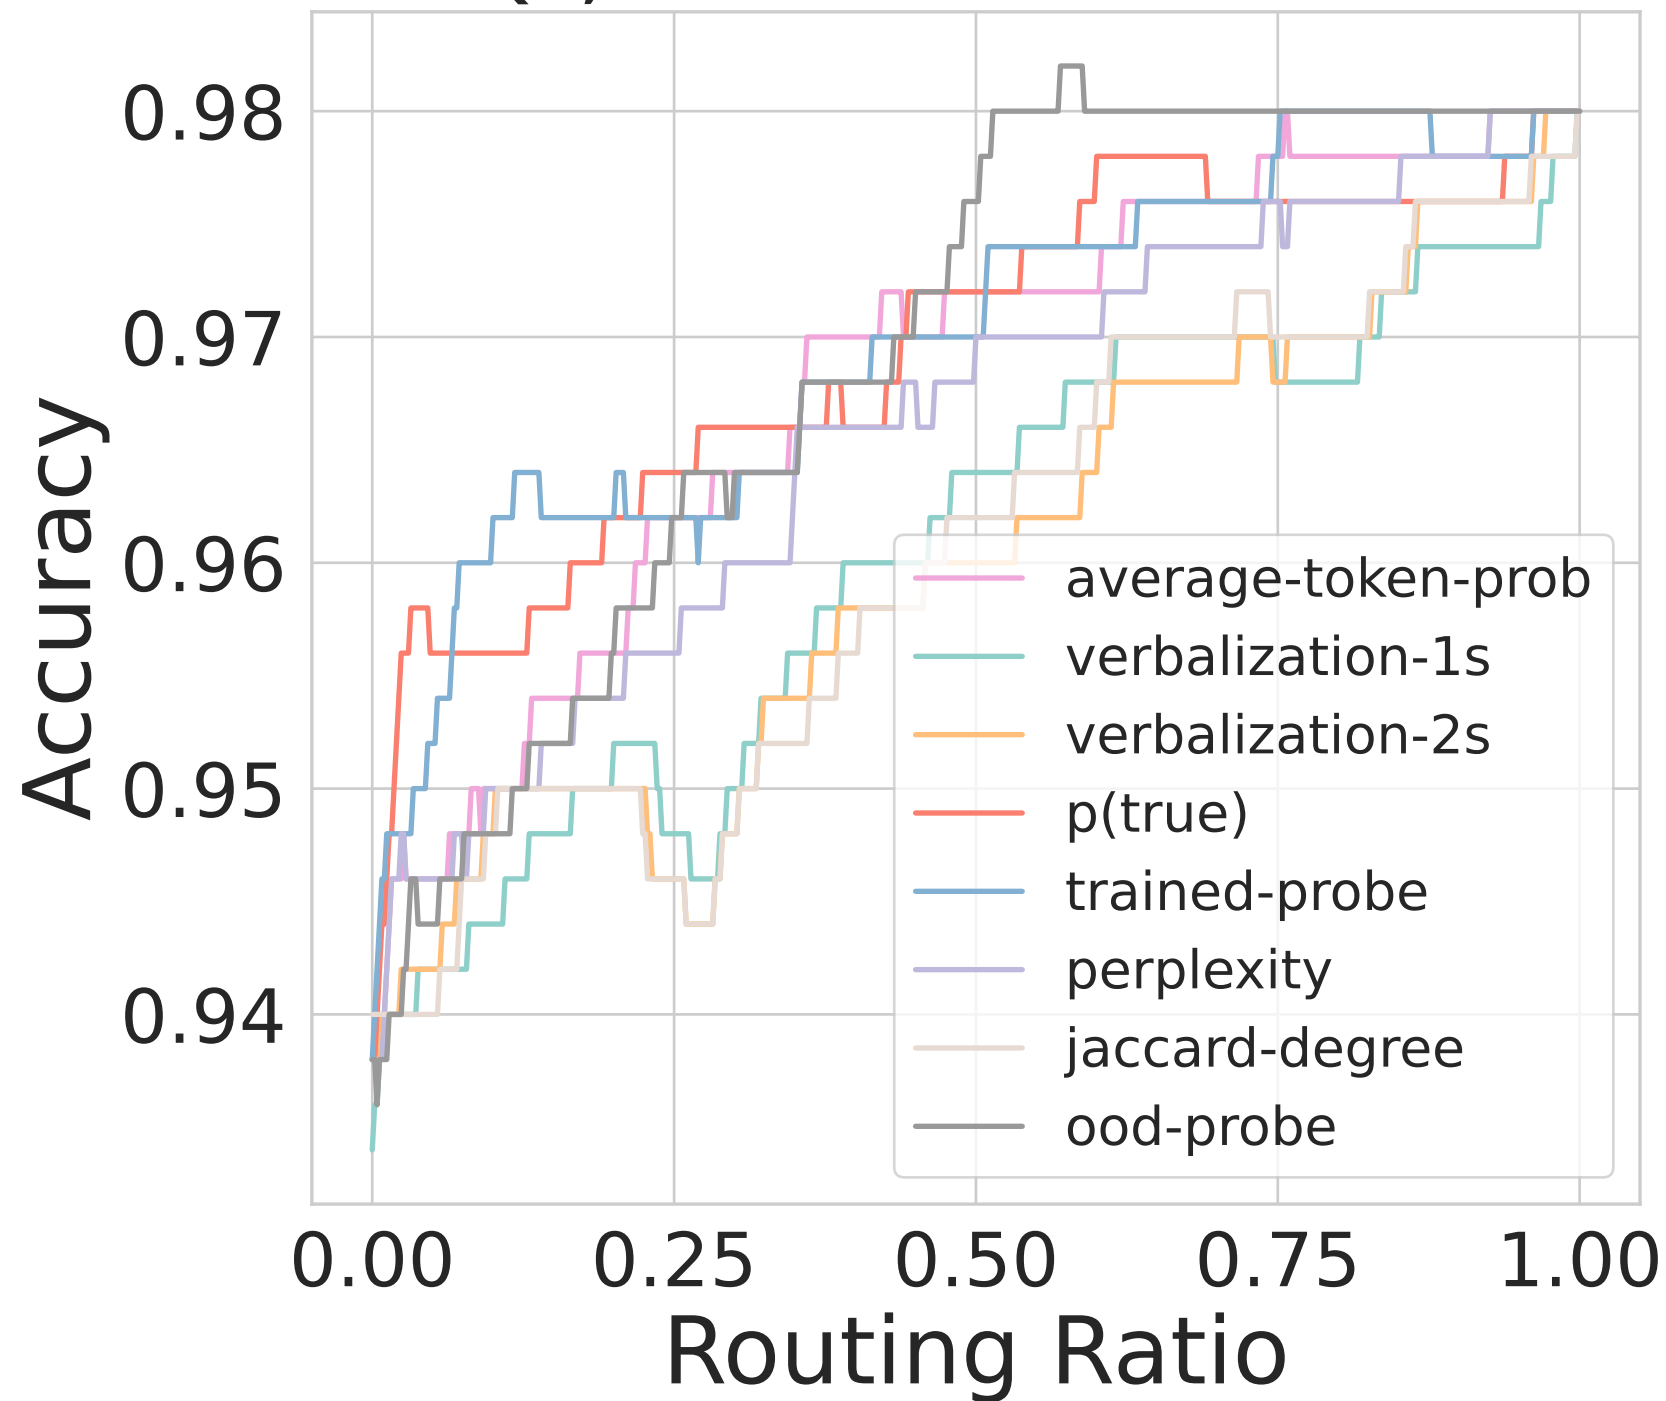

Supplement: supplementary_material [file rr_acc_co_qa_mistral-7b_llama70.pdf › Routing_SLM_LLMs/Uncertainty-based Routing/w_legend/to_llama70/rr_acc_co_qa_mistral-7b_llama70.pdf]

# CoQA, phi-3.5-mini to Llama-3.1-70B

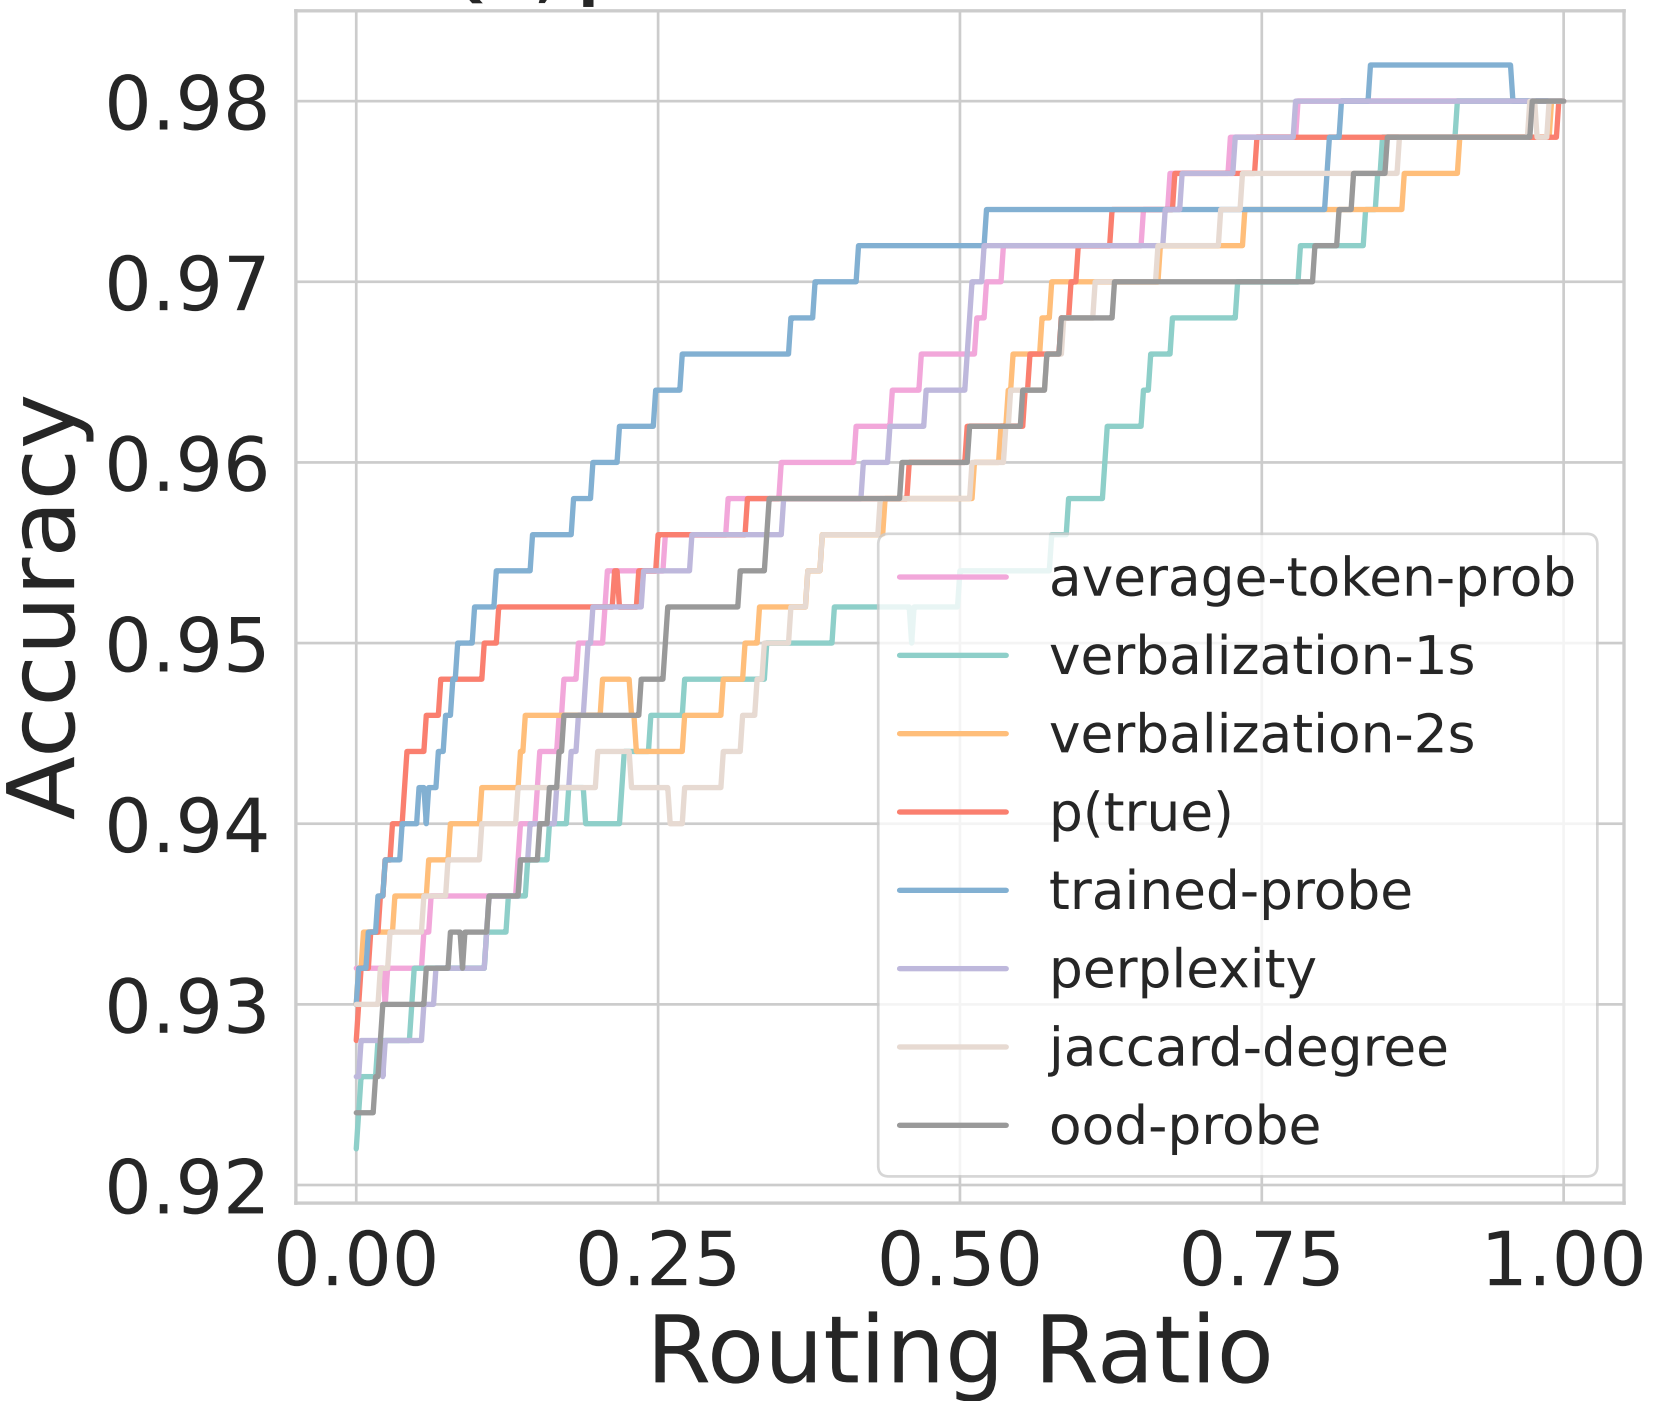

Supplement: supplementary_material [file rr_acc_co_qa_phi-3.5-mini_llama70.pdf › Routing_SLM_LLMs/Uncertainty-based Routing/w_legend/to_llama70/rr_acc_co_qa_phi-3.5-mini_llama70.pdf]

CoQA, qwen-2.5-7b to Llama-3.1-70B

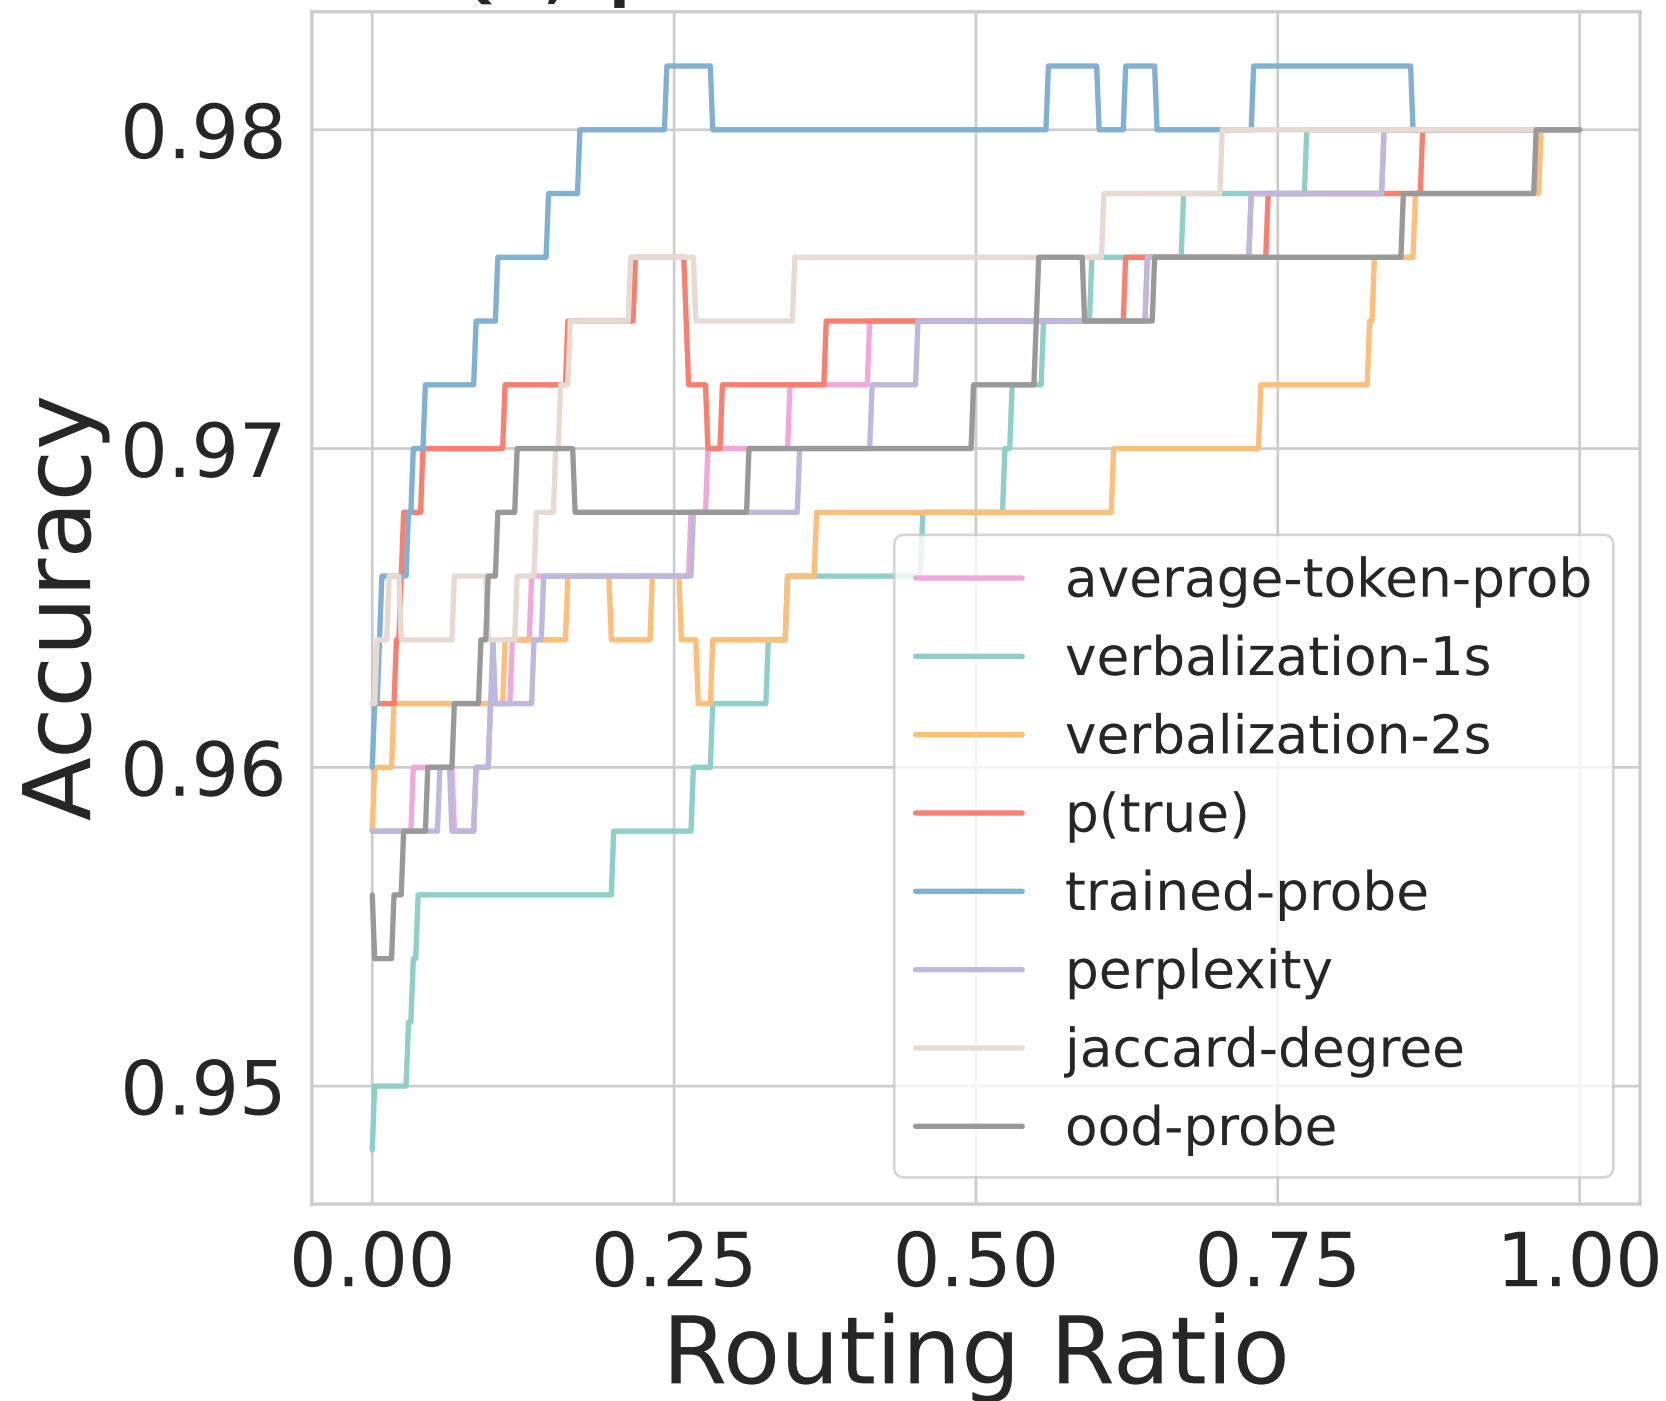

Supplement: supplementary_material [file rr_acc_co_qa_qwen-2.5-7b_llama70.pdf › Routing_SLM_LLMs/Uncertainty-based Routing/w_legend/to_llama70/rr_acc_co_qa_qwen-2.5-7b_llama70.pdf]

# CoQA, rwkv to Llama-3.1-70B

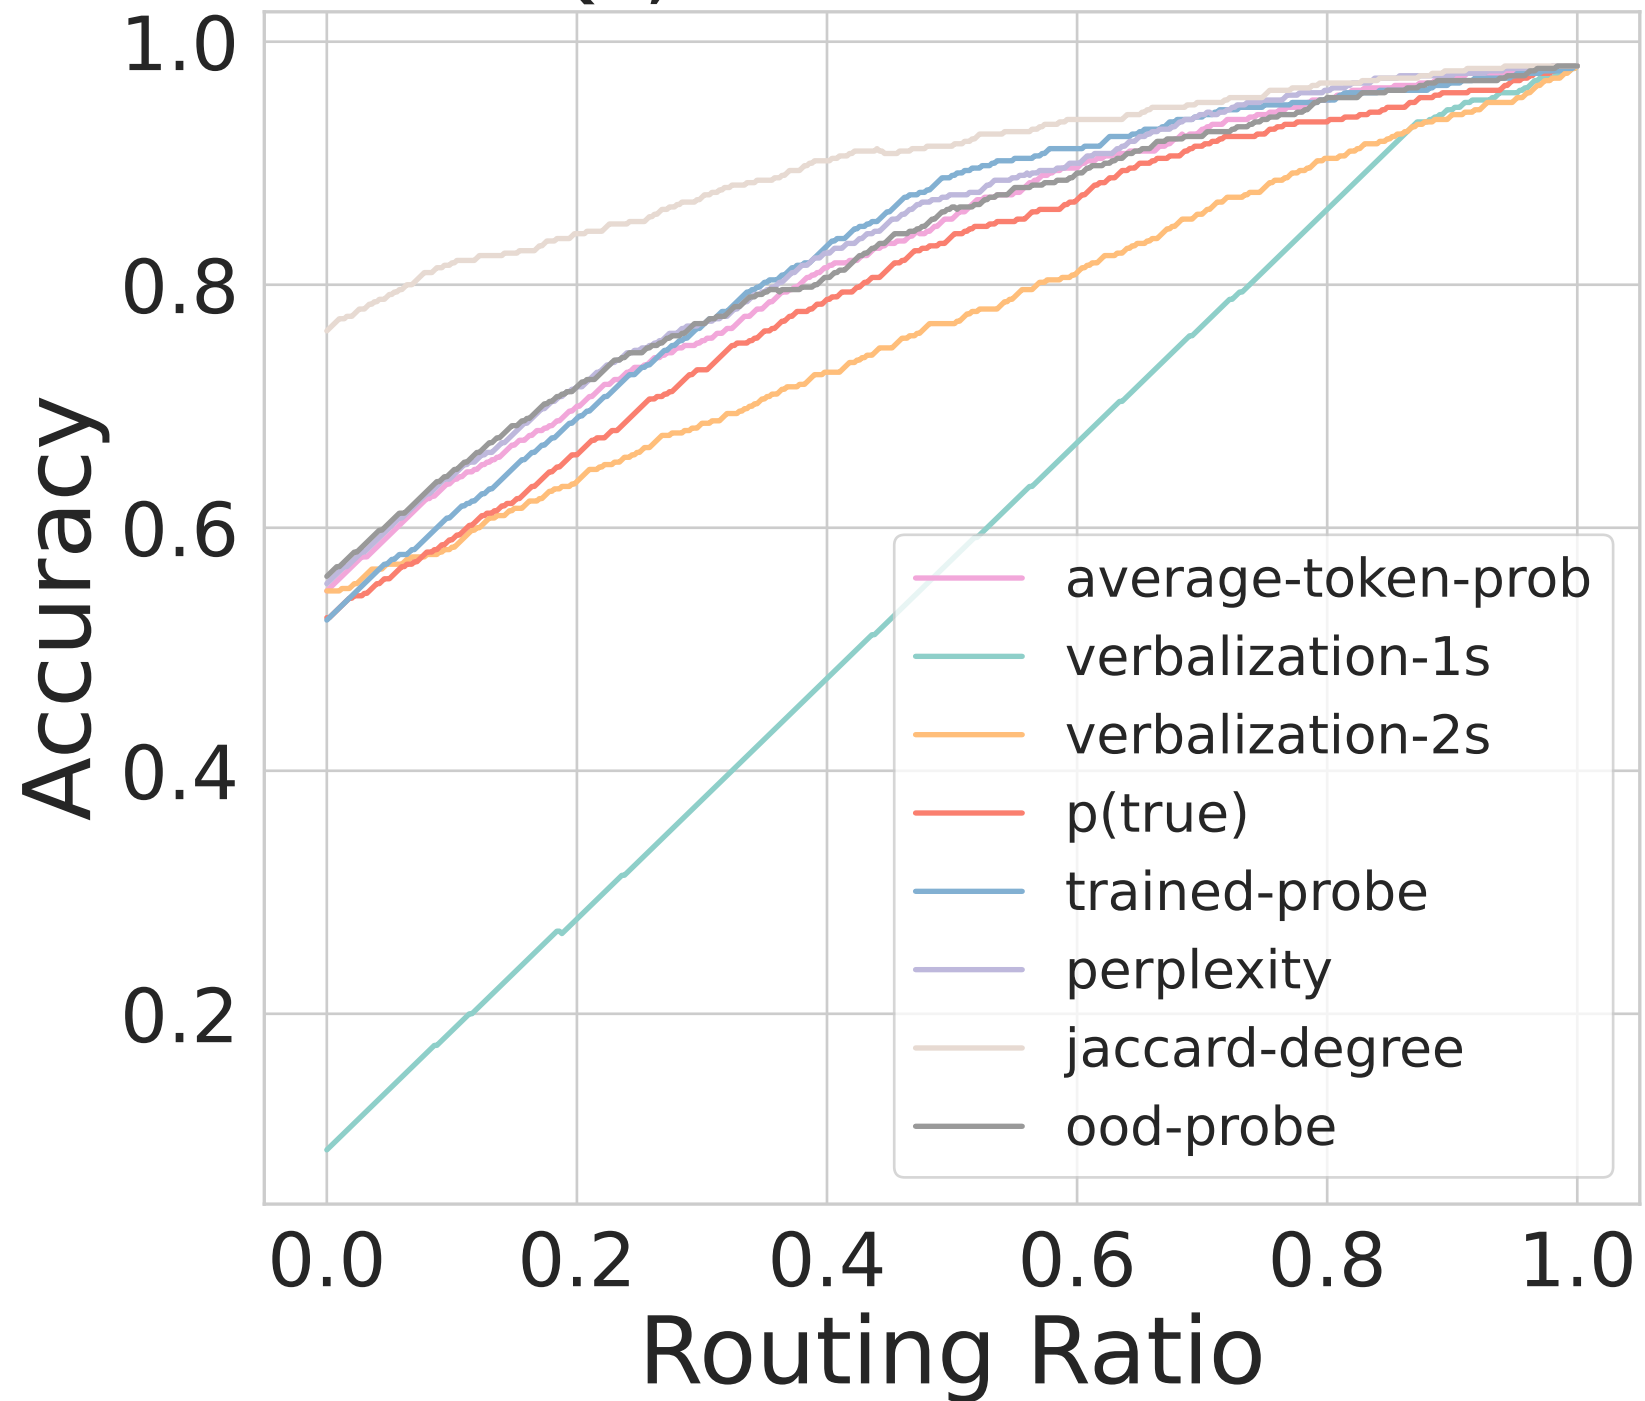

Supplement: supplementary_material [file rr_acc_co_qa_rwkv_llama70.pdf › Routing_SLM_LLMs/Uncertainty-based Routing/w_legend/to_llama70/rr_acc_co_qa_rwkv_llama70.pdf]

## CommonsenseQA, Qwen3-0.6B to Llama-3.1-70B

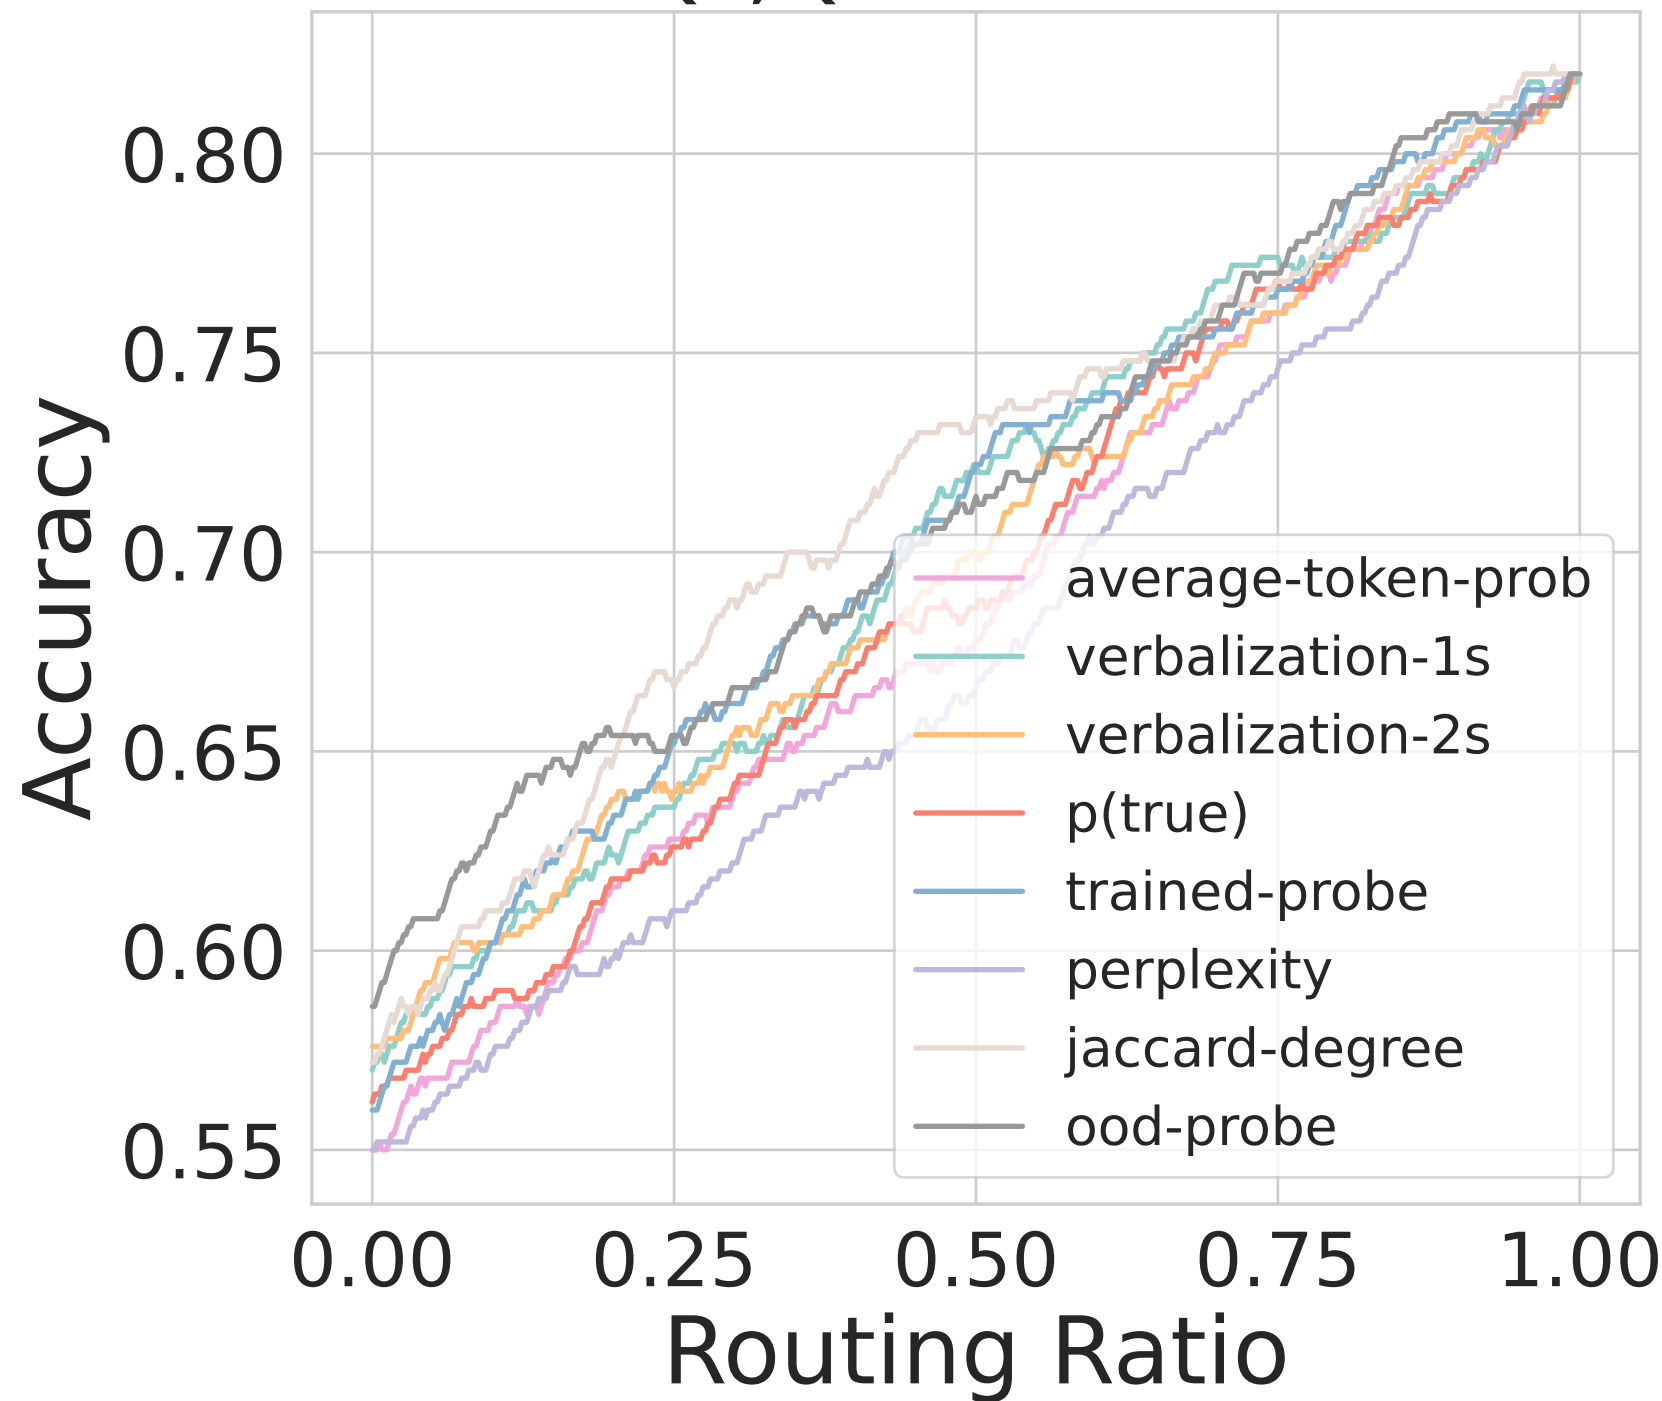

Supplement: supplementary_material [file rr_acc_commonsense_qa_Qwen3-0.6B_llama70.pdf › Routing_SLM_LLMs/Uncertainty-based Routing/w_legend/to_llama70/rr_acc_commonsense_qa_Qwen3-0.6B_llama70.pdf]

# CommonsenseQA, Qwen3-1.7B to Llama-3.1-70B

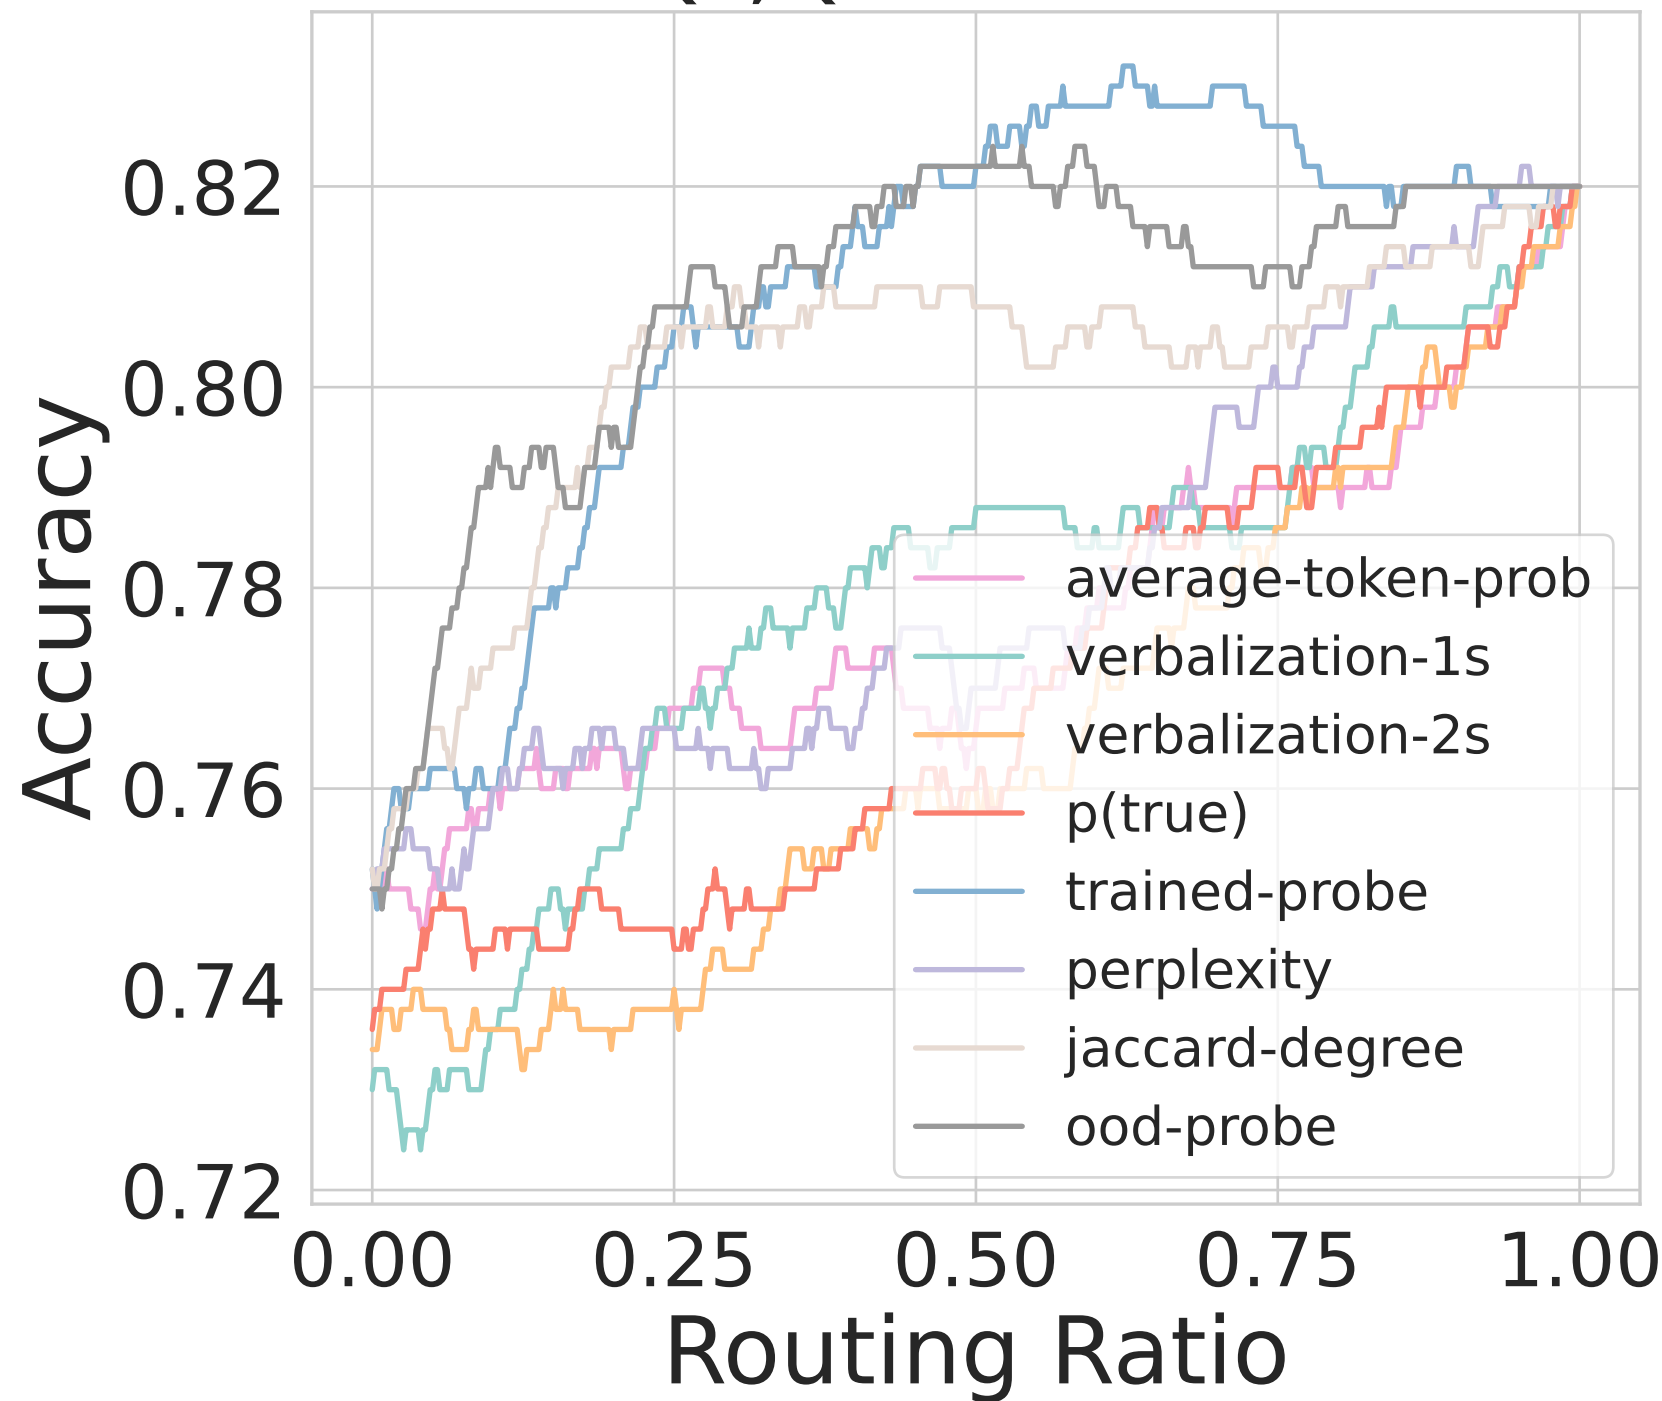

Supplement: supplementary_material [file rr_acc_commonsense_qa_Qwen3-1.7B_llama70.pdf › Routing_SLM_LLMs/Uncertainty-based Routing/w_legend/to_llama70/rr_acc_commonsense_qa_Qwen3-1.7B_llama70.pdf]

# CommonsenseQA, Qwen3-4B to Llama-3.1-70B

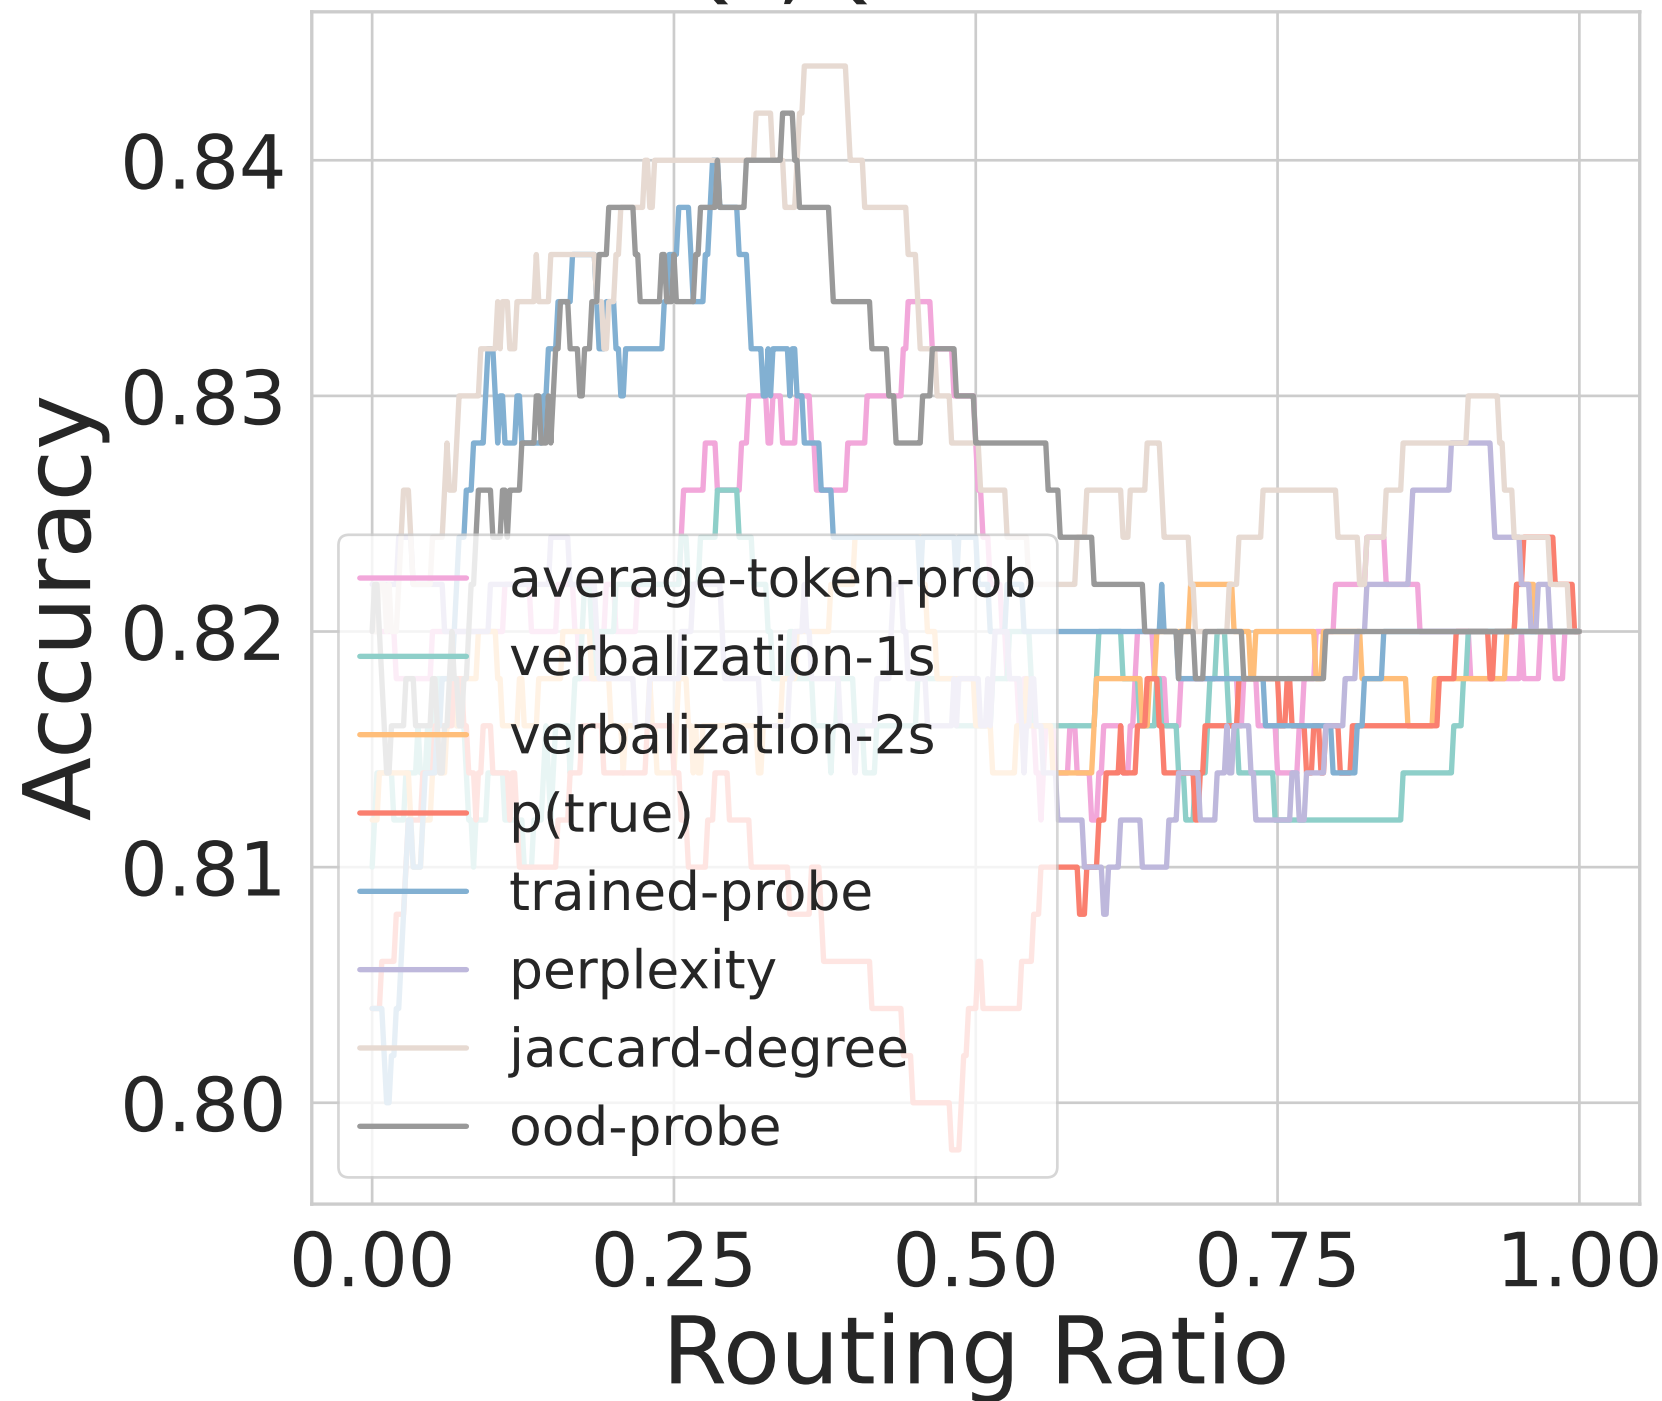

Supplement: supplementary_material [file rr_acc_commonsense_qa_Qwen3-4B_llama70.pdf › Routing_SLM_LLMs/Uncertainty-based Routing/w_legend/to_llama70/rr_acc_commonsense_qa_Qwen3-4B_llama70.pdf]

# CommonsenseQA, granite-3.1-8b to Llama-3.1-70B

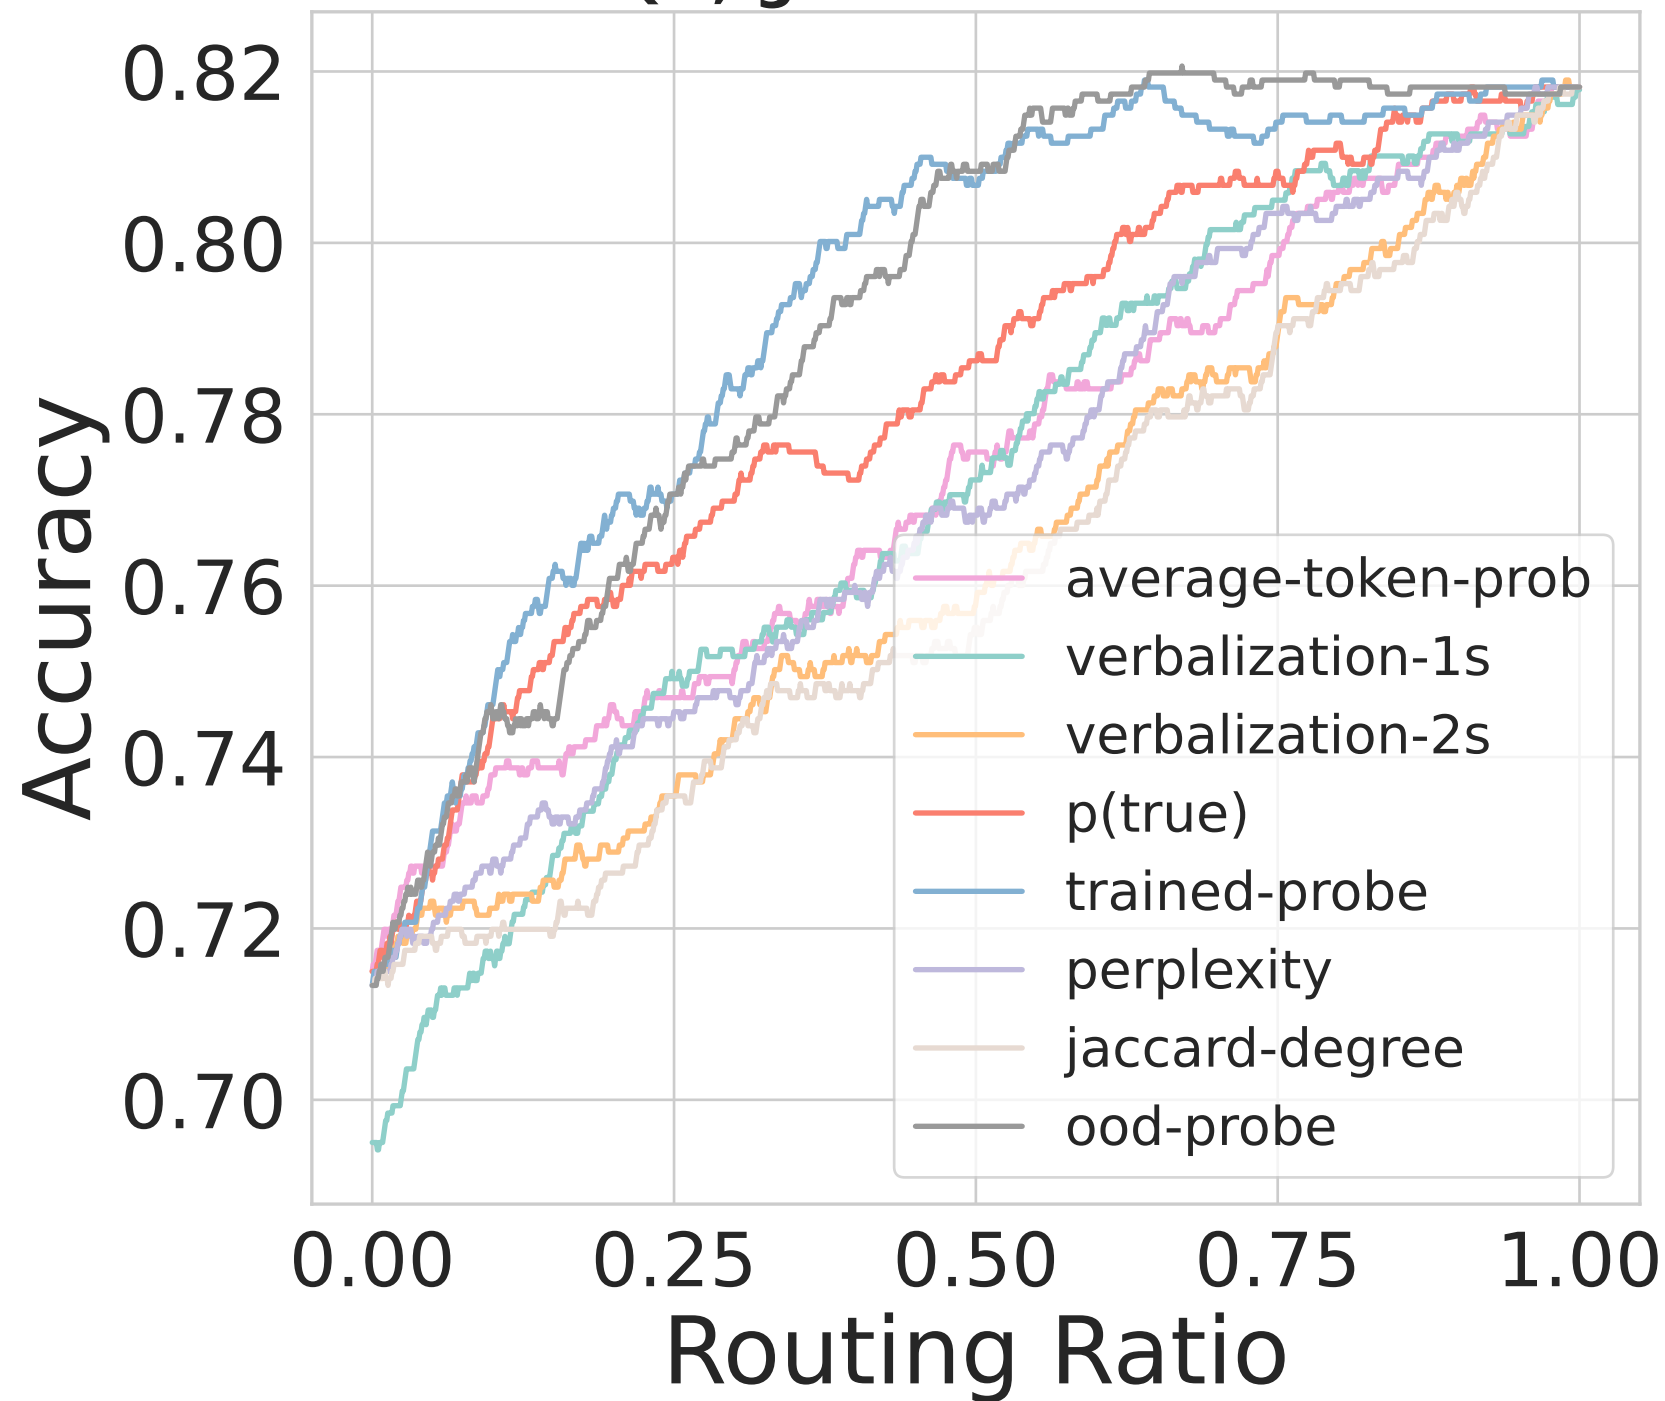

Supplement: supplementary_material [file rr_acc_commonsense_qa_granite-3.1-8b_llama70.pdf › Routing_SLM_LLMs/Uncertainty-based Routing/w_legend/to_llama70/rr_acc_commonsense_qa_granite-3.1-8b_llama70.pdf]

## CommonsenseQA, llama-3.1-8b to Llama-3.1-70B

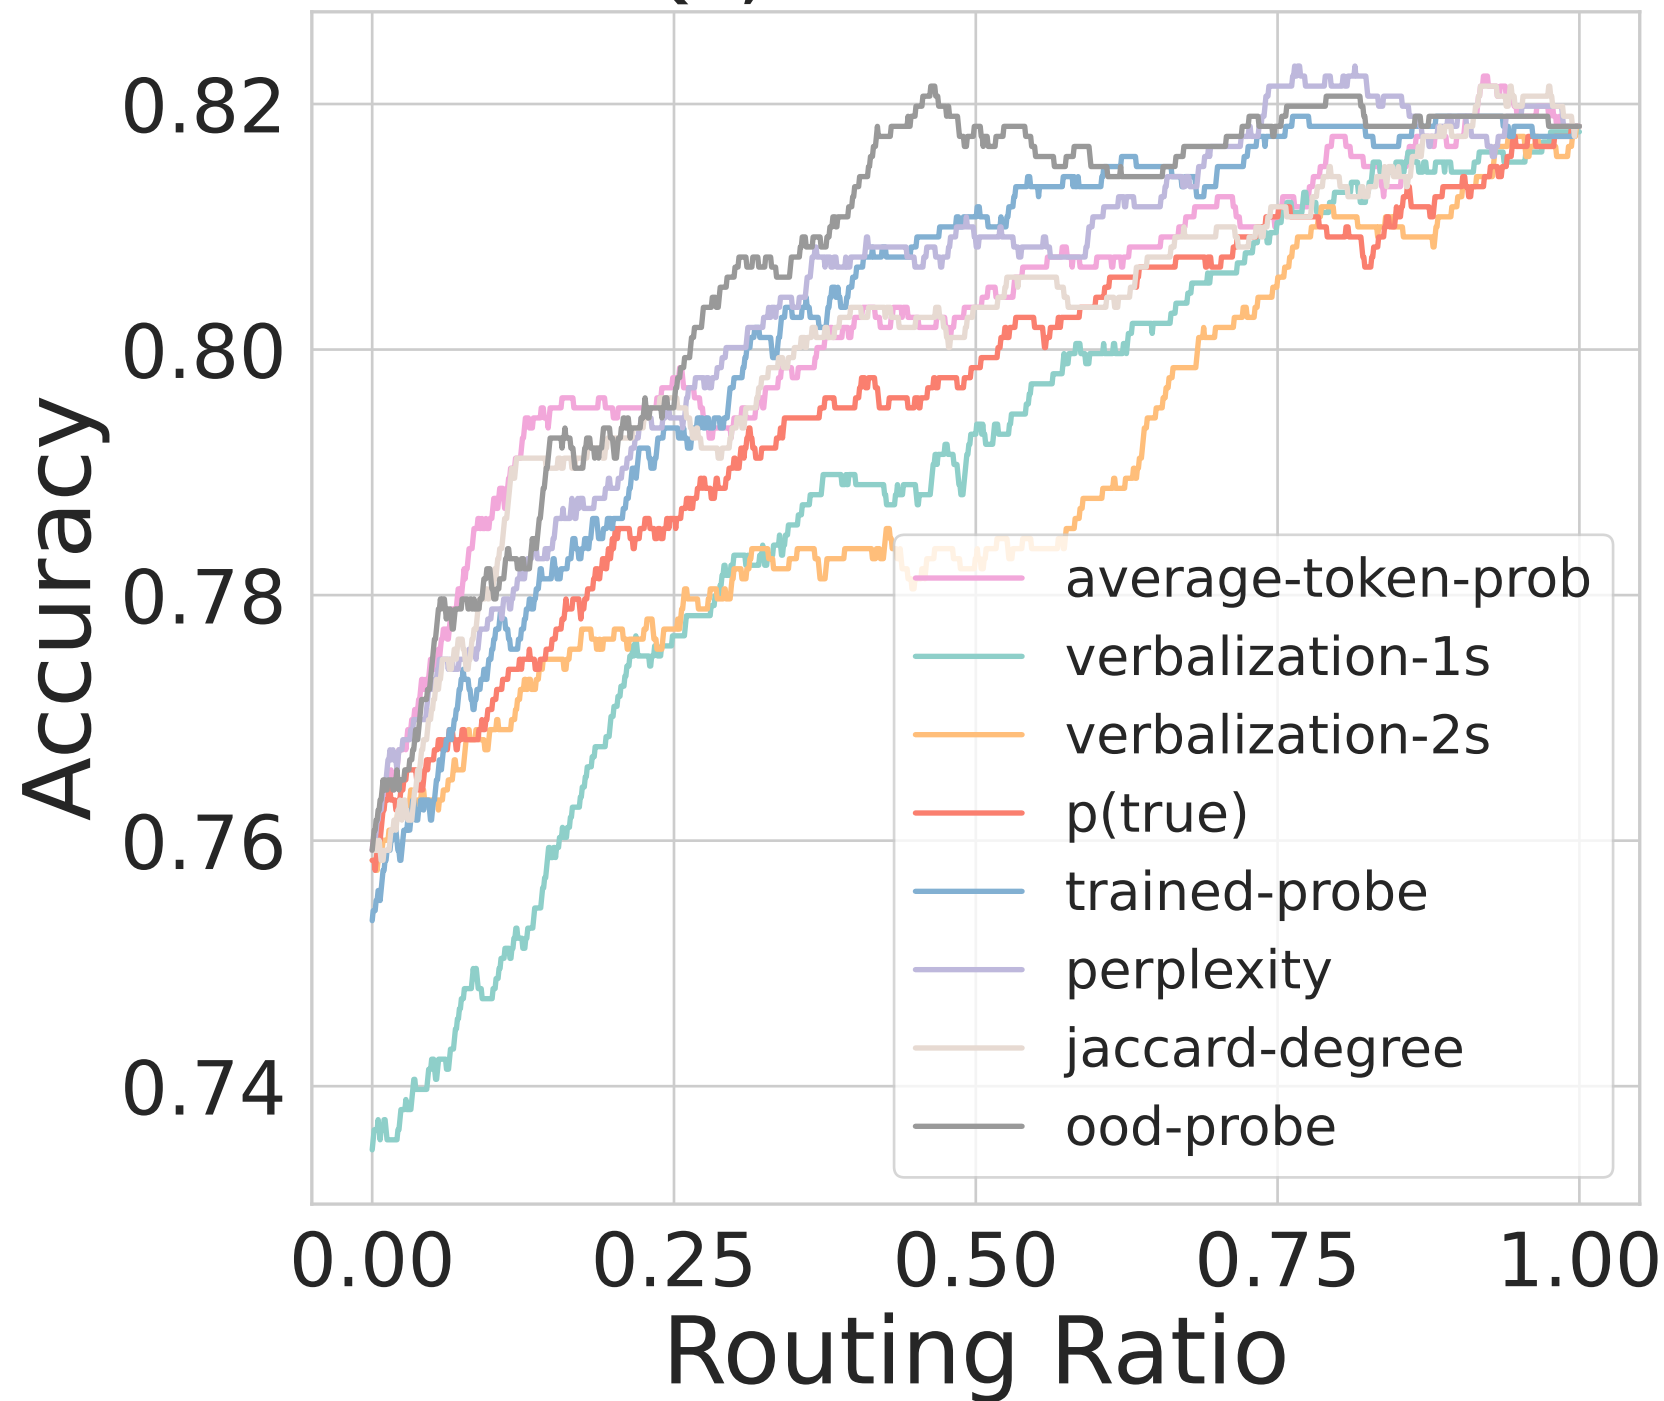

Supplement: supplementary_material [file rr_acc_commonsense_qa_llama-3.1-8b_llama70.pdf › Routing_SLM_LLMs/Uncertainty-based Routing/w_legend/to_llama70/rr_acc_commonsense_qa_llama-3.1-8b_llama70.pdf]

## CommonsenseQA, llama-3.2-1b to Llama-3.1-70B

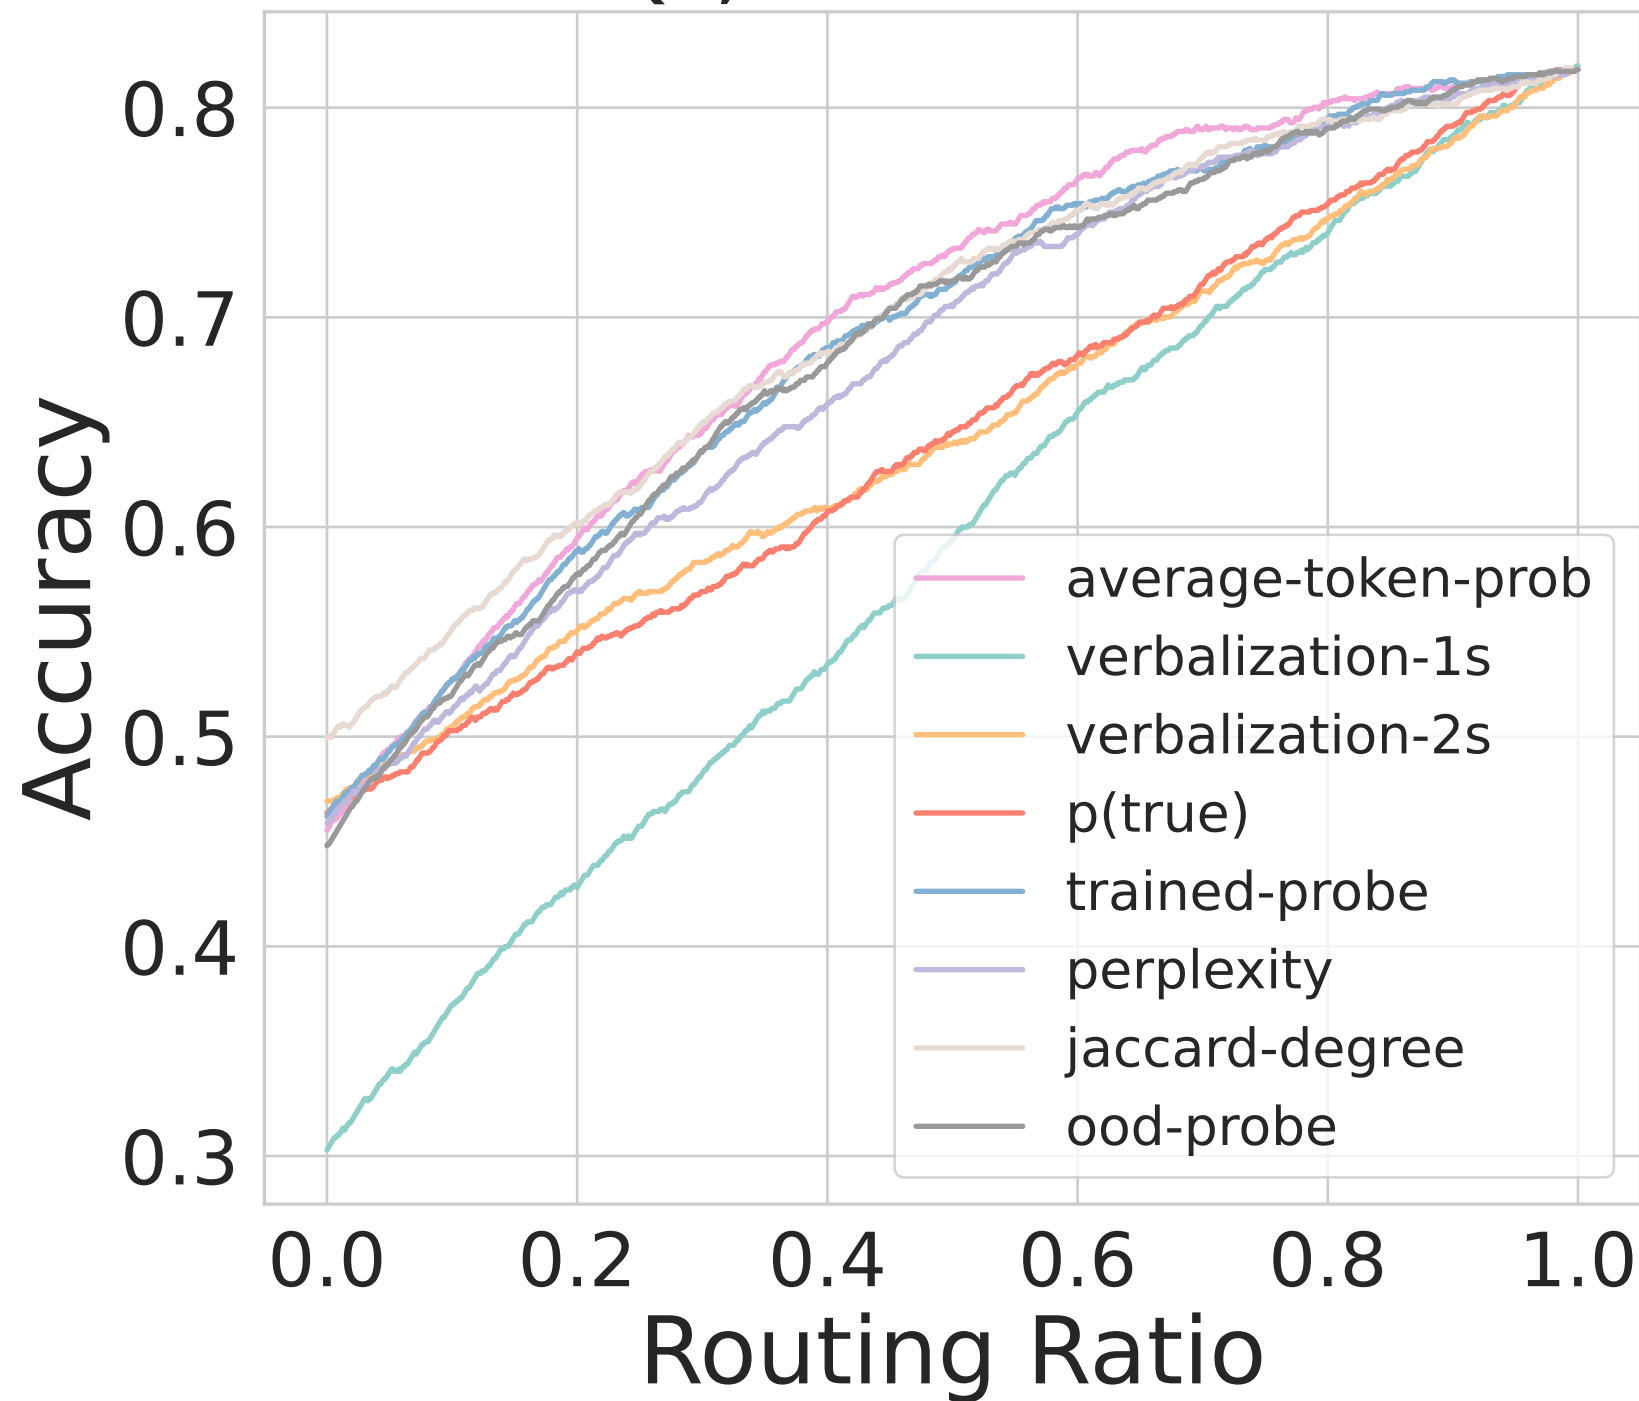

Supplement: supplementary_material [file rr_acc_commonsense_qa_llama-3.2-1b_llama70.pdf › Routing_SLM_LLMs/Uncertainty-based Routing/w_legend/to_llama70/rr_acc_commonsense_qa_llama-3.2-1b_llama70.pdf]

**CommonsenseQA, llama-3.2-3b to Llama-3.1-70B**

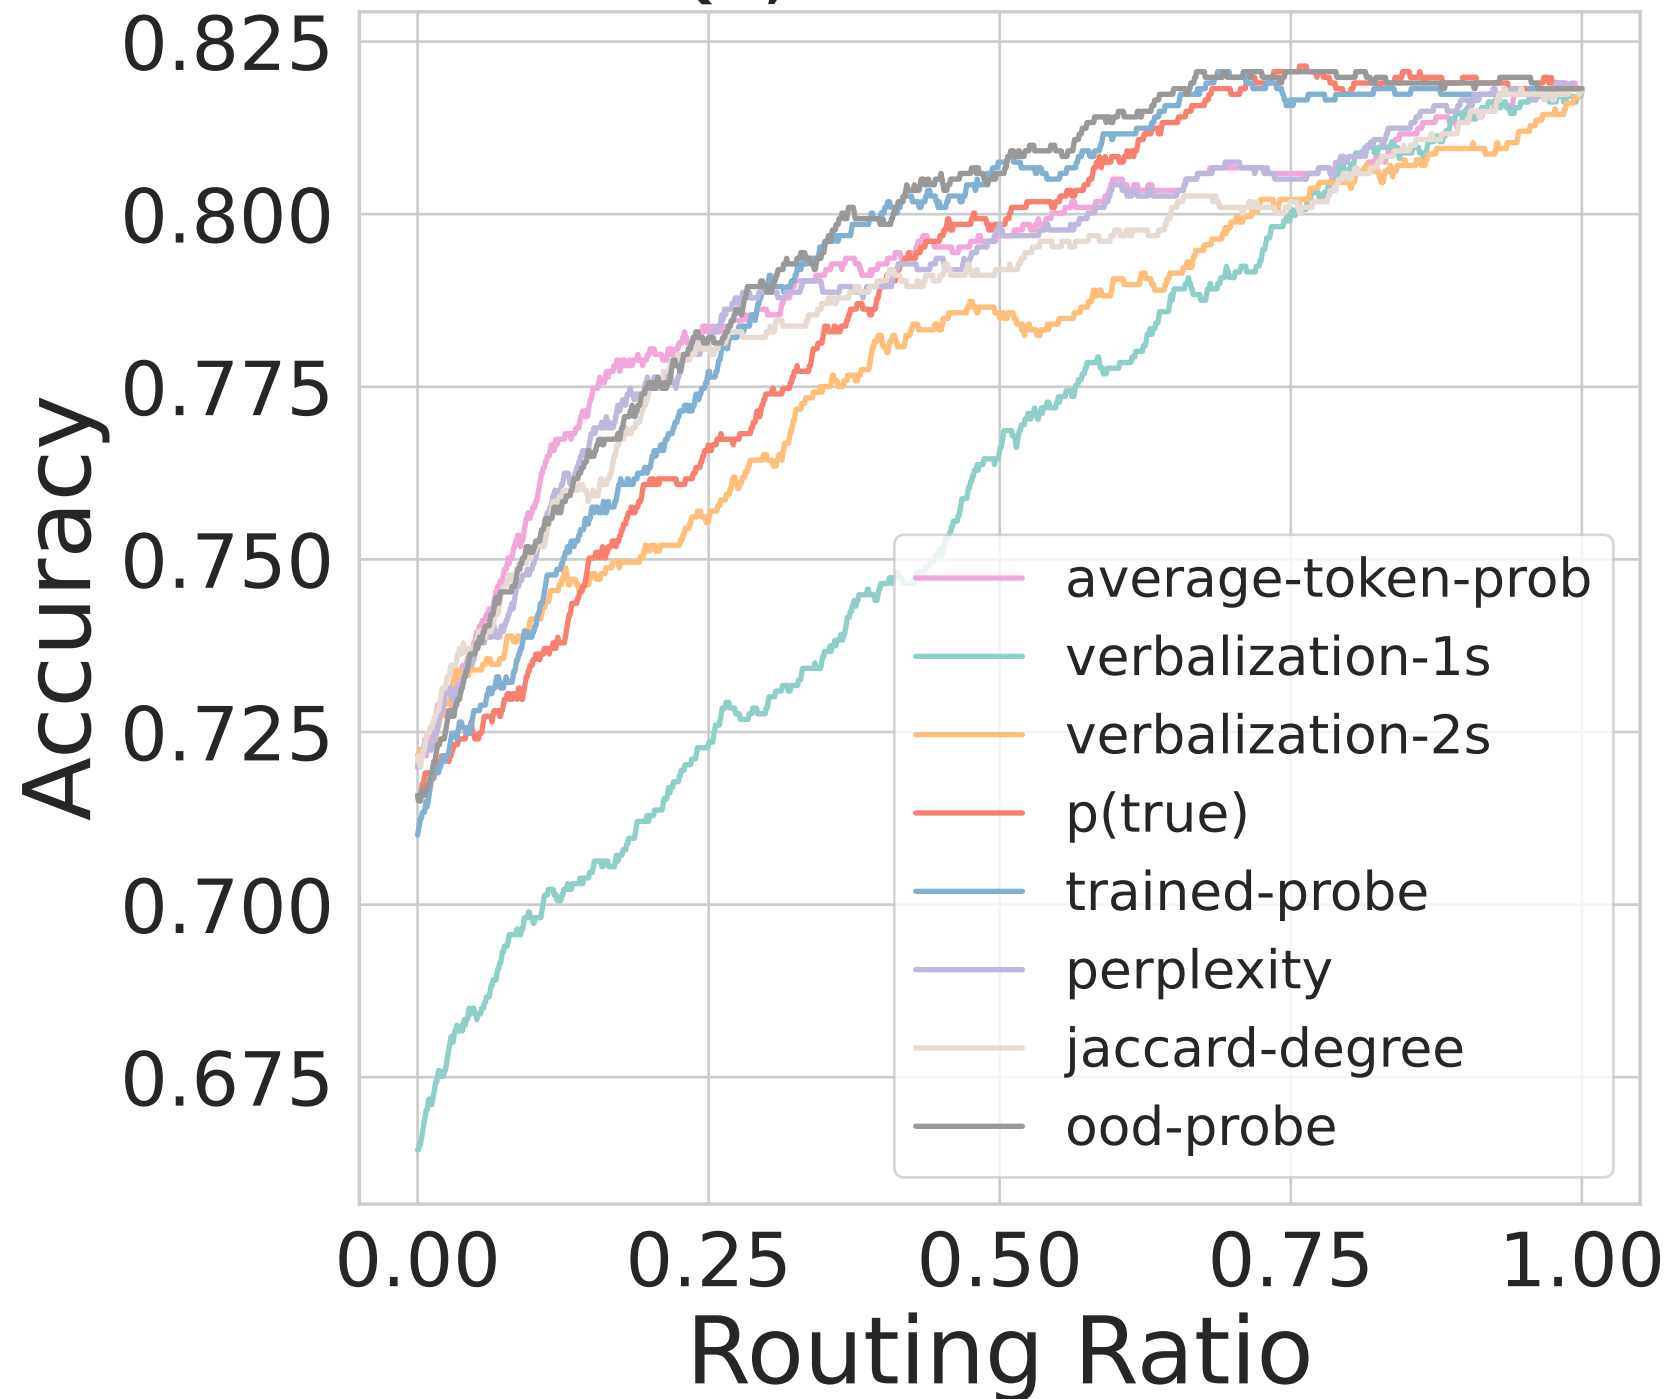

Supplement: supplementary_material [file rr_acc_commonsense_qa_llama-3.2-3b_llama70.pdf › Routing_SLM_LLMs/Uncertainty-based Routing/w_legend/to_llama70/rr_acc_commonsense_qa_llama-3.2-3b_llama70.pdf]

# CommonsenseQA, mistral-7b to Llama-3.1-70B

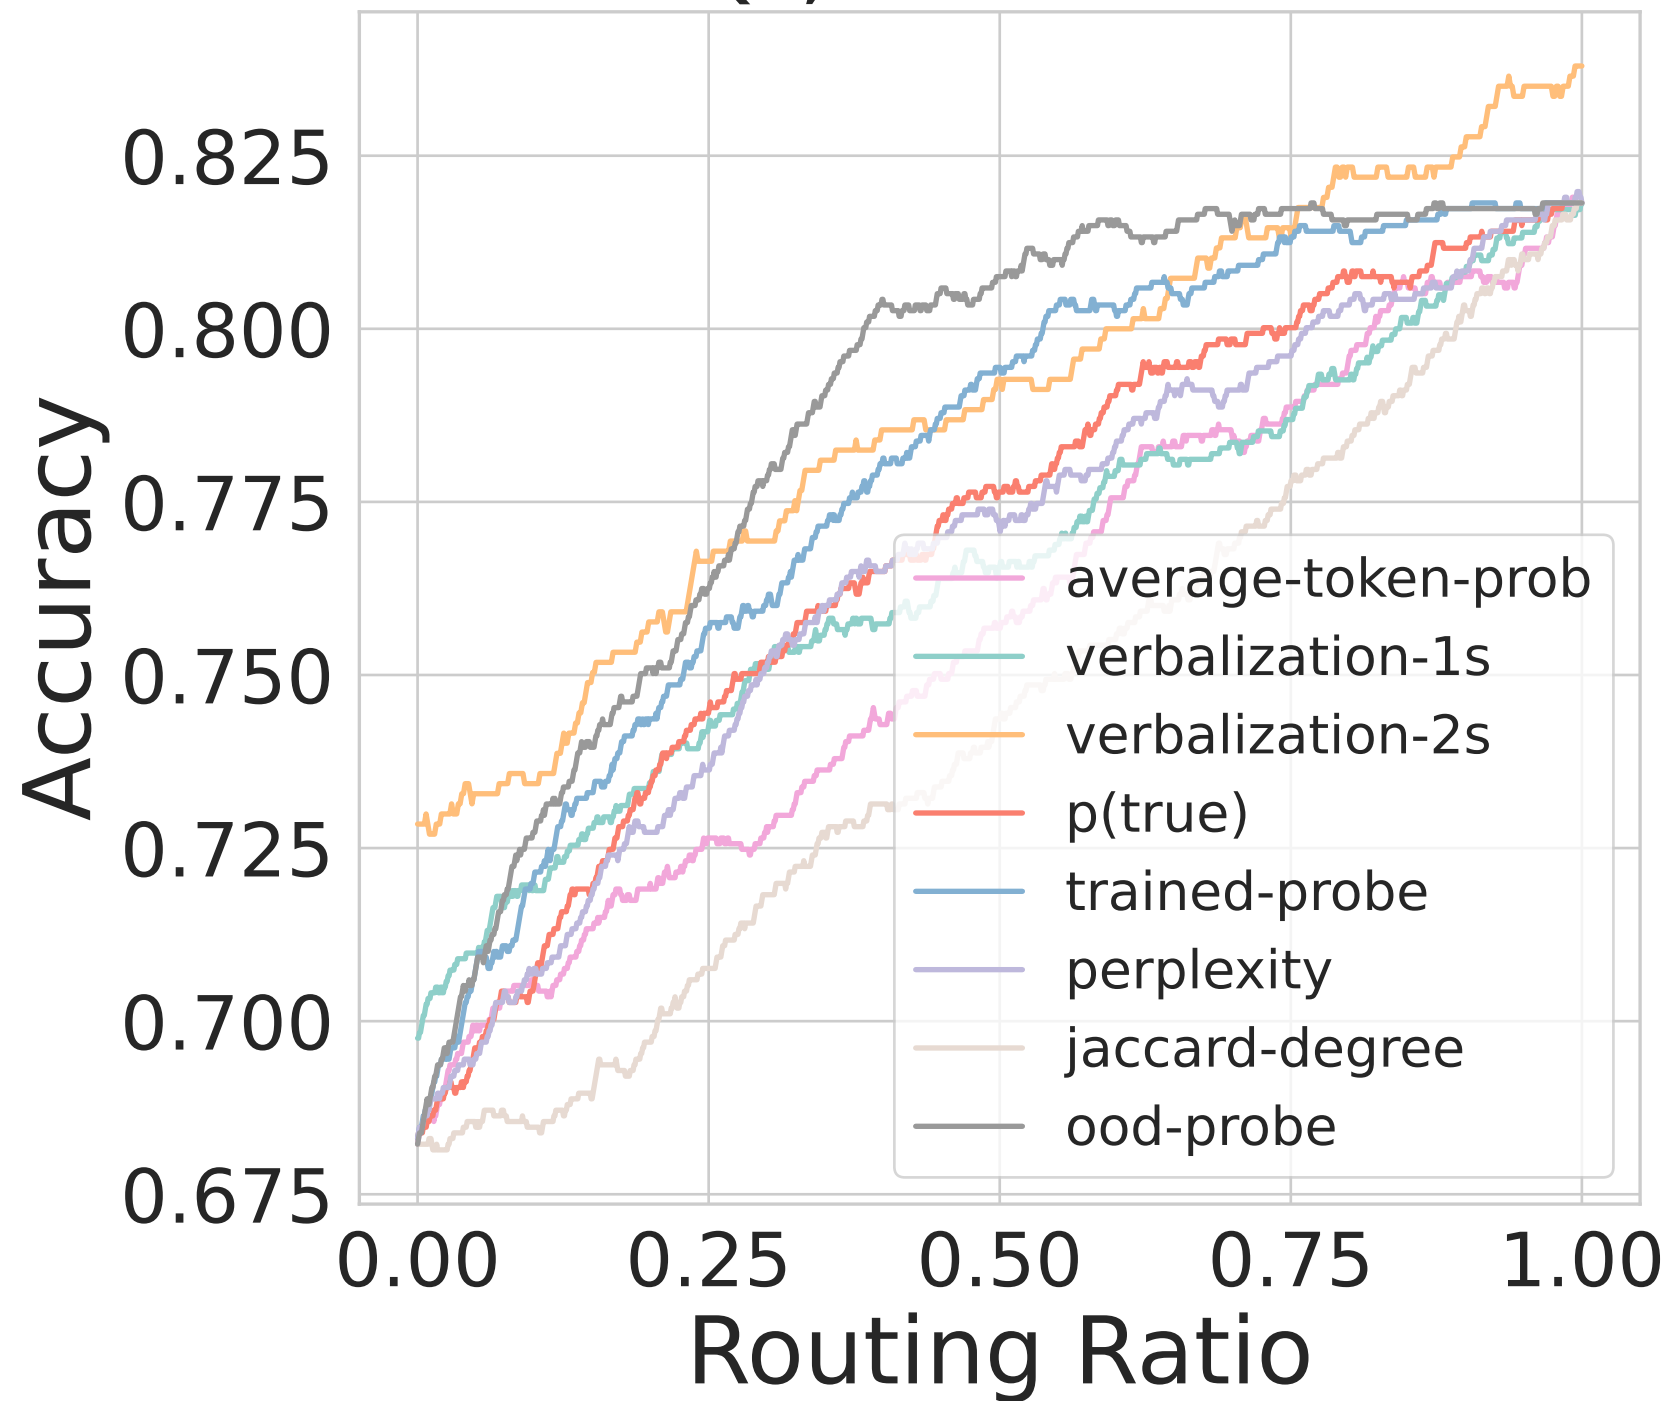

Supplement: supplementary_material [file rr_acc_commonsense_qa_mistral-7b_llama70.pdf › Routing_SLM_LLMs/Uncertainty-based Routing/w_legend/to_llama70/rr_acc_commonsense_qa_mistral-7b_llama70.pdf]

# CommonsenseQA, phi-3.5-mini to Llama-3.1-70B

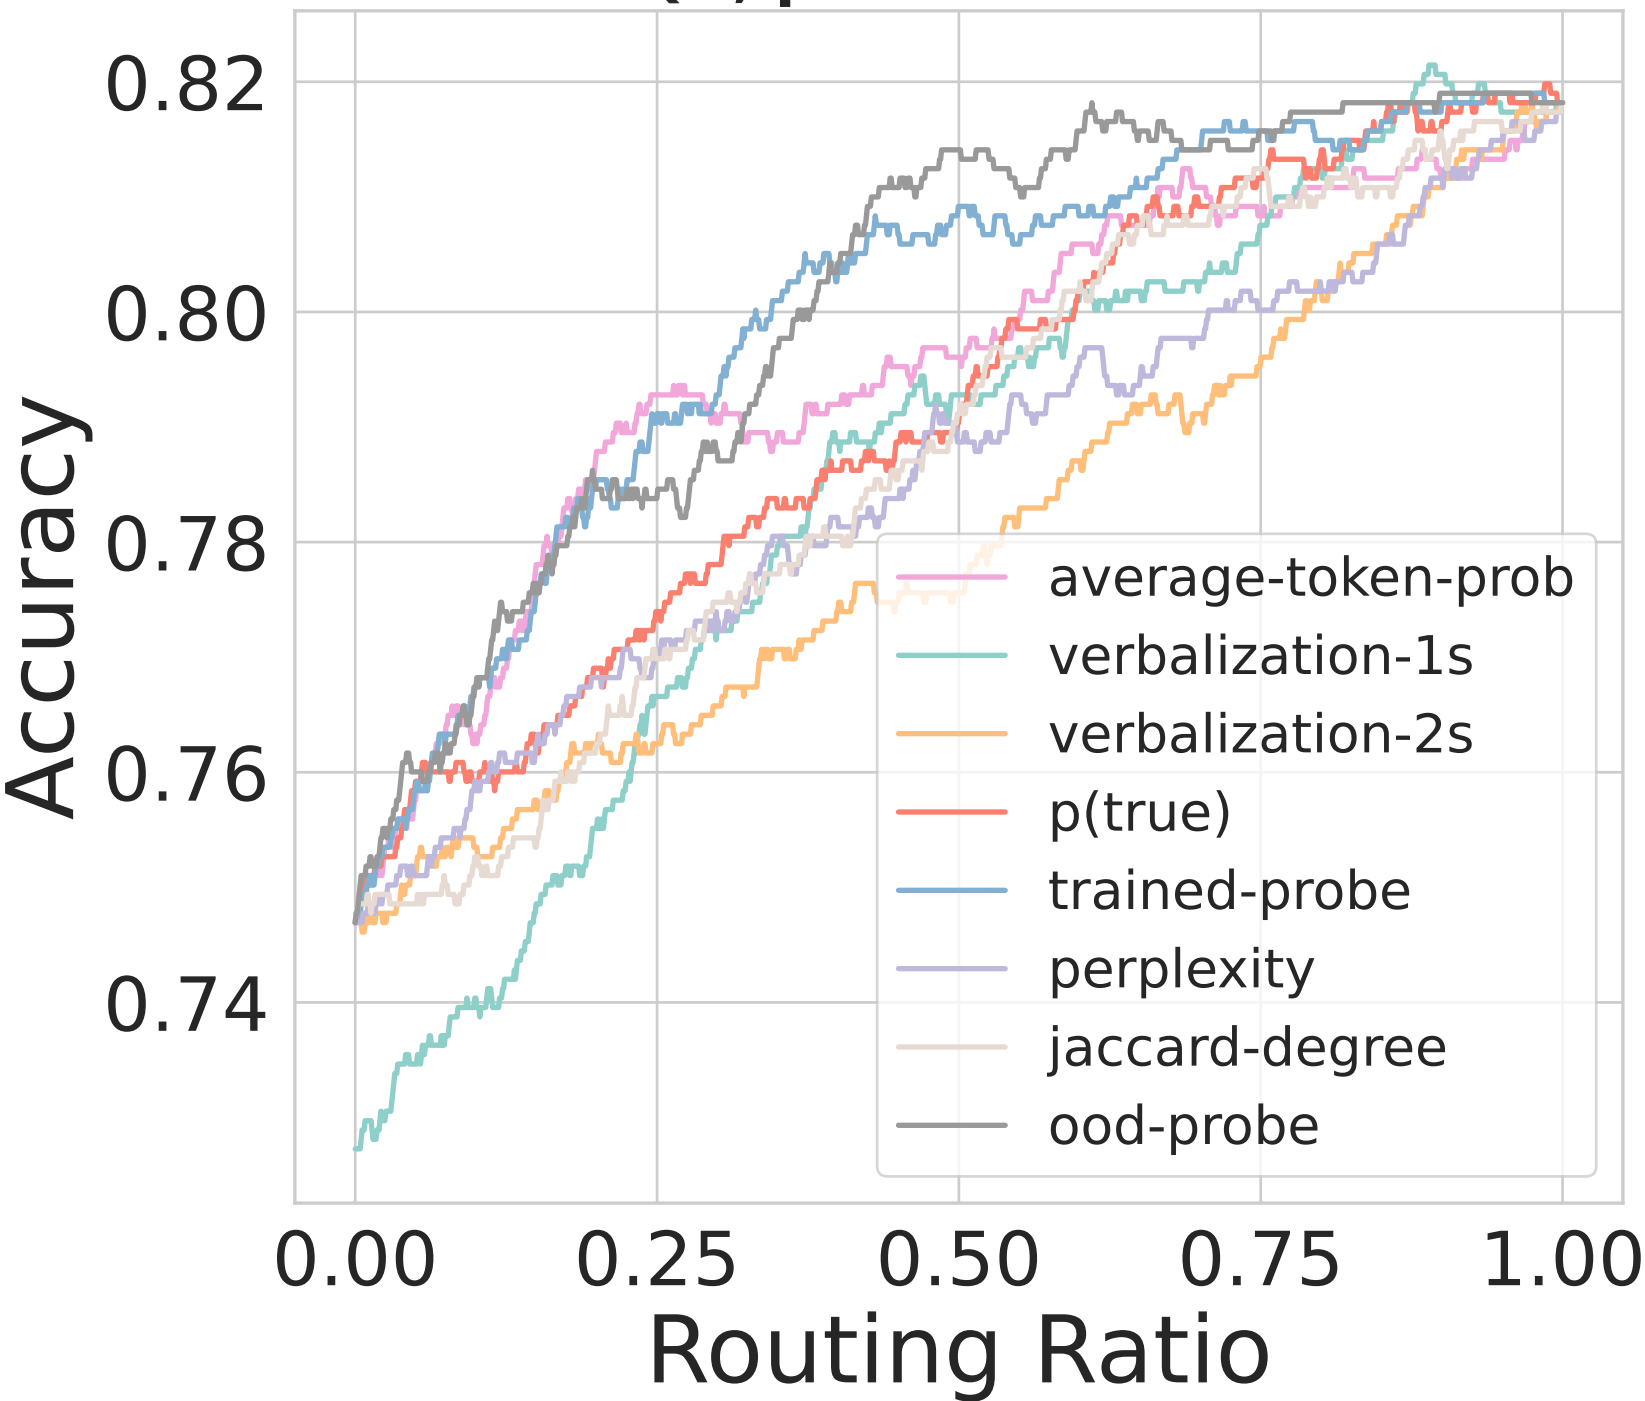

Supplement: supplementary_material [file rr_acc_commonsense_qa_phi-3.5-mini_llama70.pdf › Routing_SLM_LLMs/Uncertainty-based Routing/w_legend/to_llama70/rr_acc_commonsense_qa_phi-3.5-mini_llama70.pdf]

# CommonsenseQA, phi-4-mini-reasoning to Llama-3.1-70B

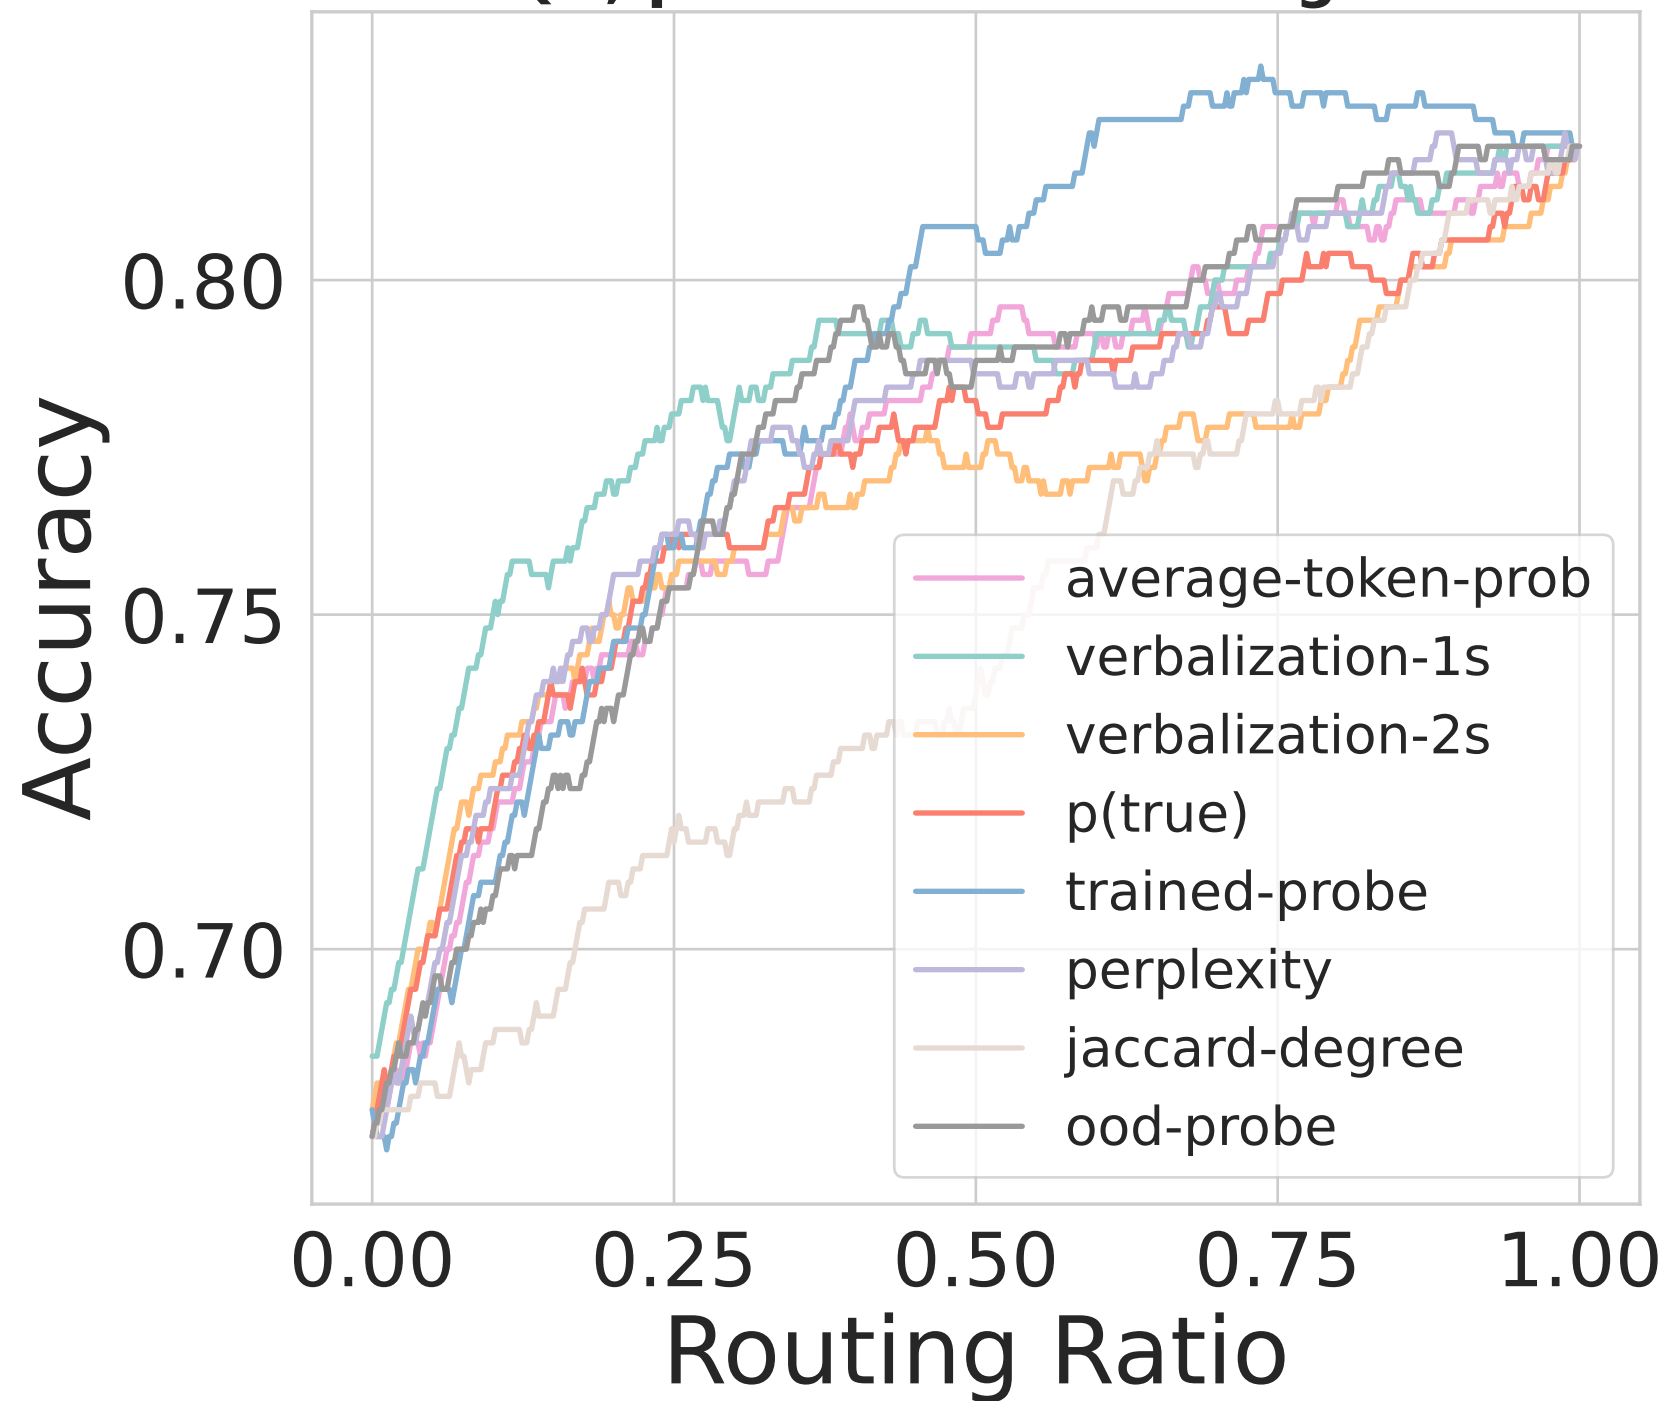

Supplement: supplementary_material [file rr_acc_commonsense_qa_phi-4-mini-reasoning_llama70.pdf › Routing_SLM_LLMs/Uncertainty-based Routing/w_legend/to_llama70/rr_acc_commonsense_qa_phi-4-mini-reasoning_llama70.pdf]

## CommonsenseQA, qwen-2.5-7b to Llama-3.1-70B

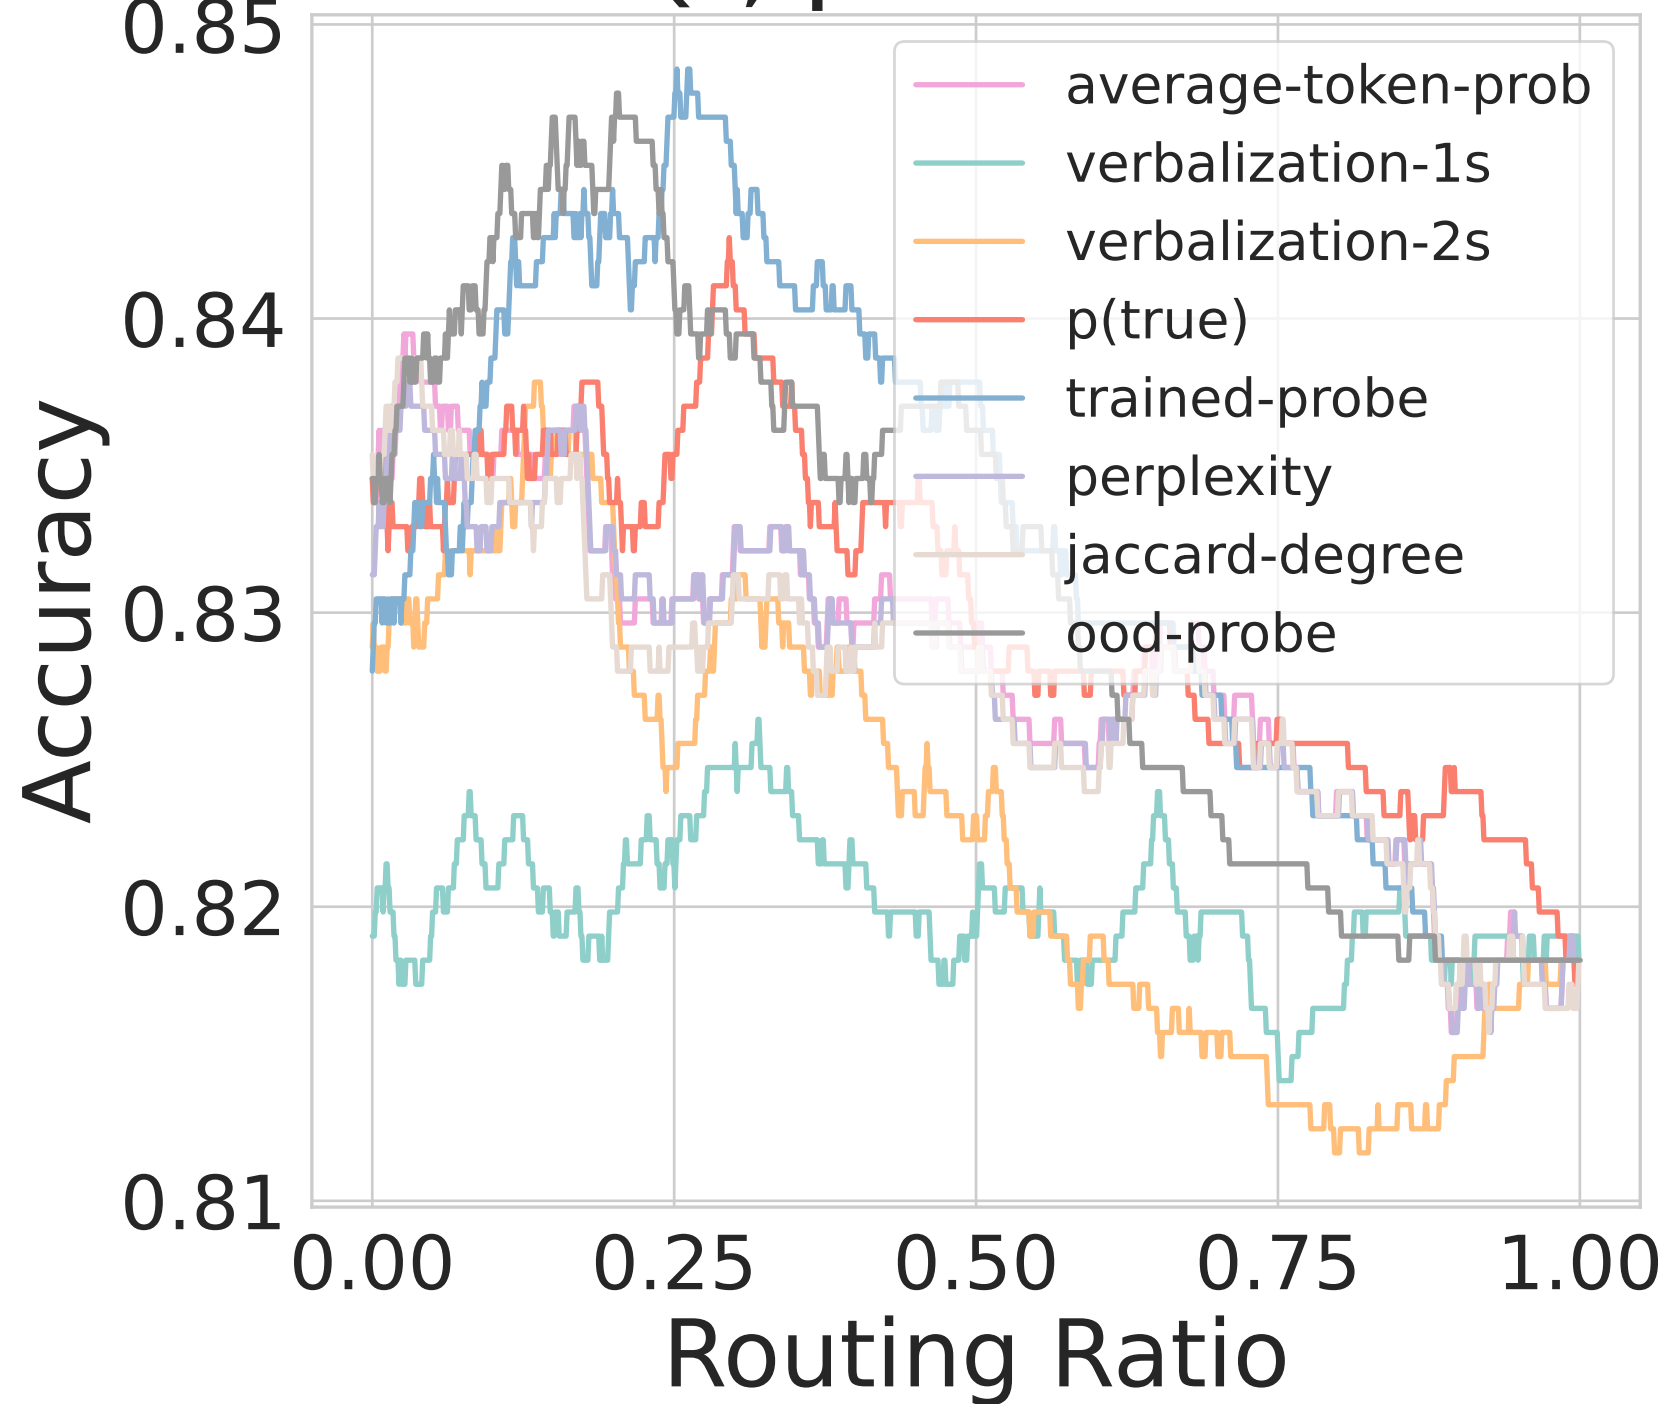

Supplement: supplementary_material [file rr_acc_commonsense_qa_qwen-2.5-7b_llama70.pdf › Routing_SLM_LLMs/Uncertainty-based Routing/w_legend/to_llama70/rr_acc_commonsense_qa_qwen-2.5-7b_llama70.pdf]

# CommonsenseQA, rwkv to Llama-3.1-70B

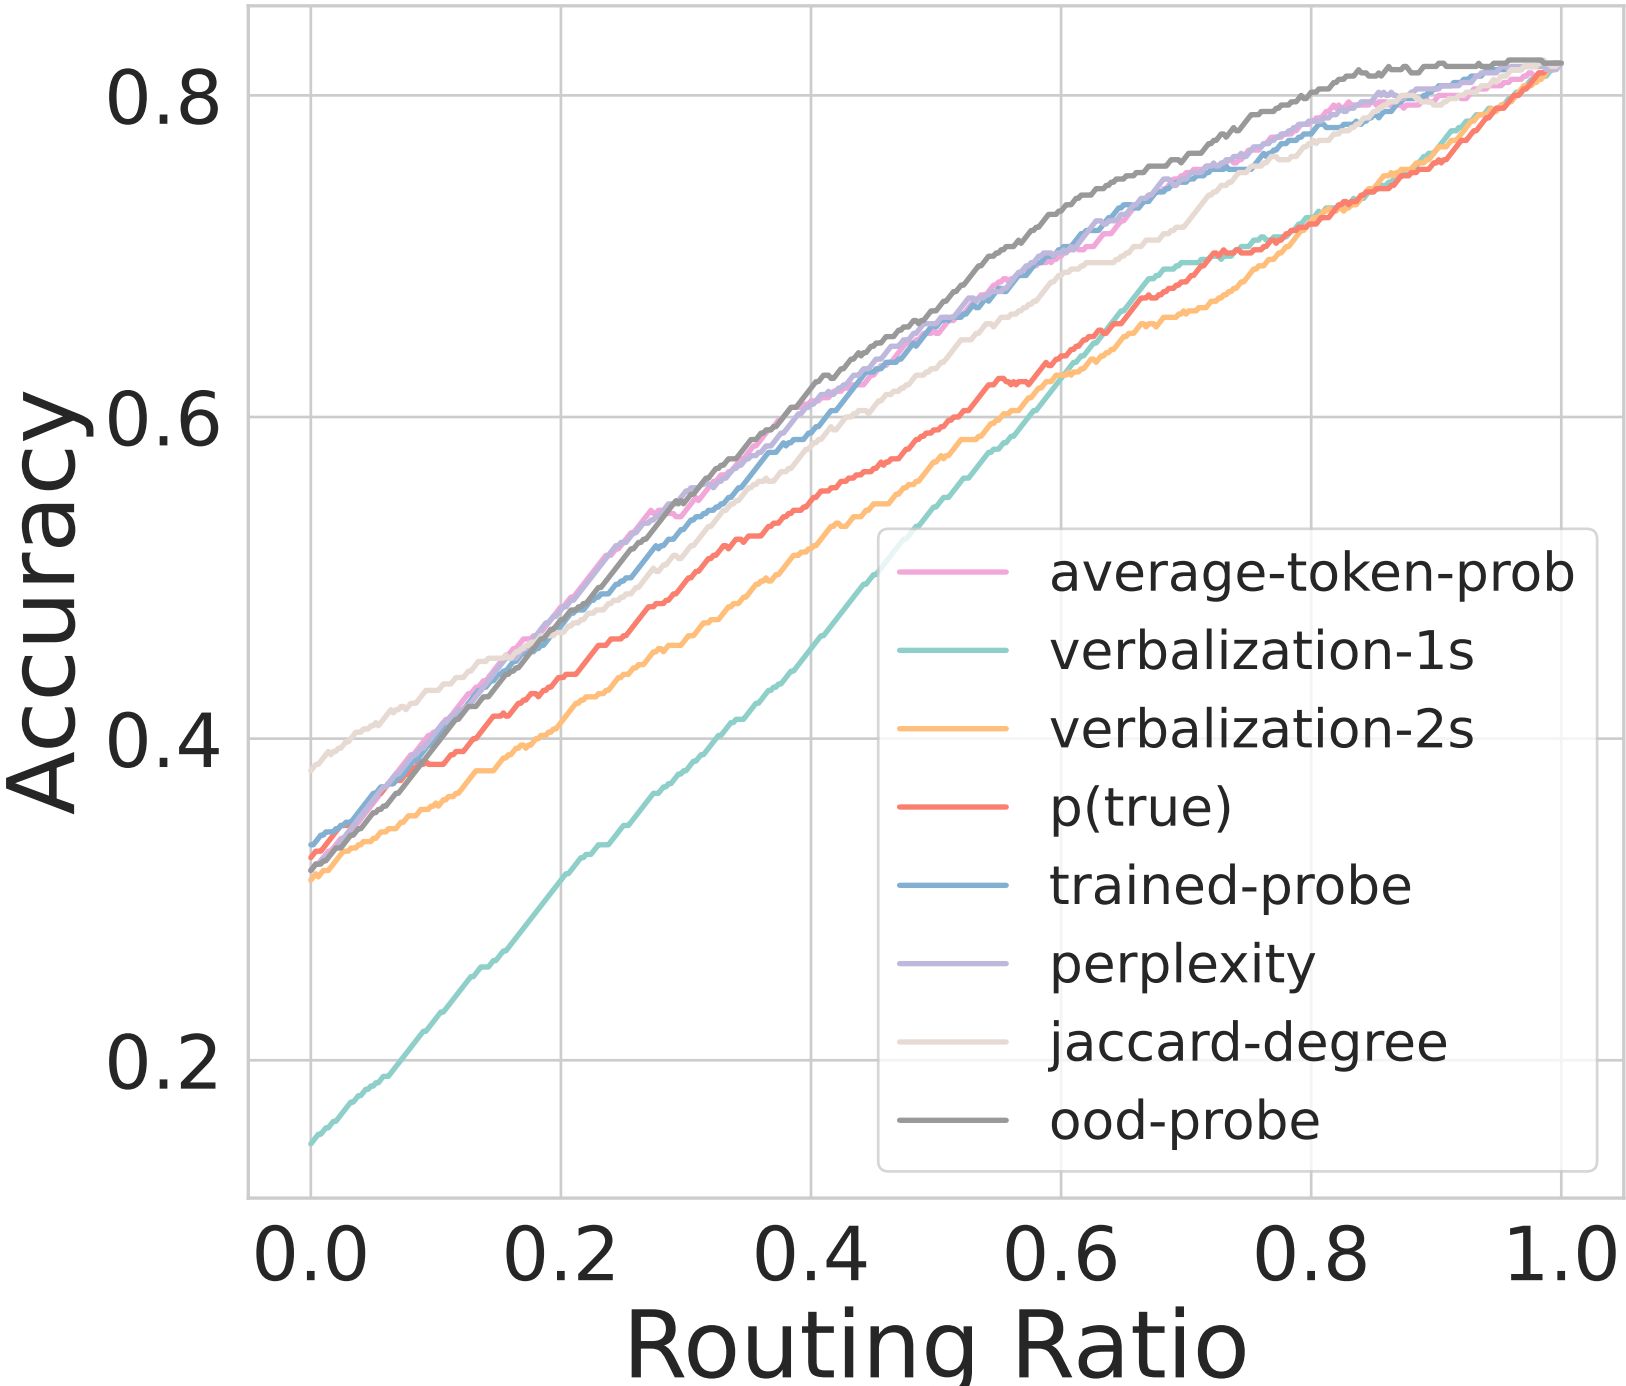

Supplement: supplementary_material [file rr_acc_commonsense_qa_rwkv_llama70.pdf › Routing_SLM_LLMs/Uncertainty-based Routing/w_legend/to_llama70/rr_acc_commonsense_qa_rwkv_llama70.pdf]

# GSM8K, Qwen3-0.6B to Llama-3.1-70B

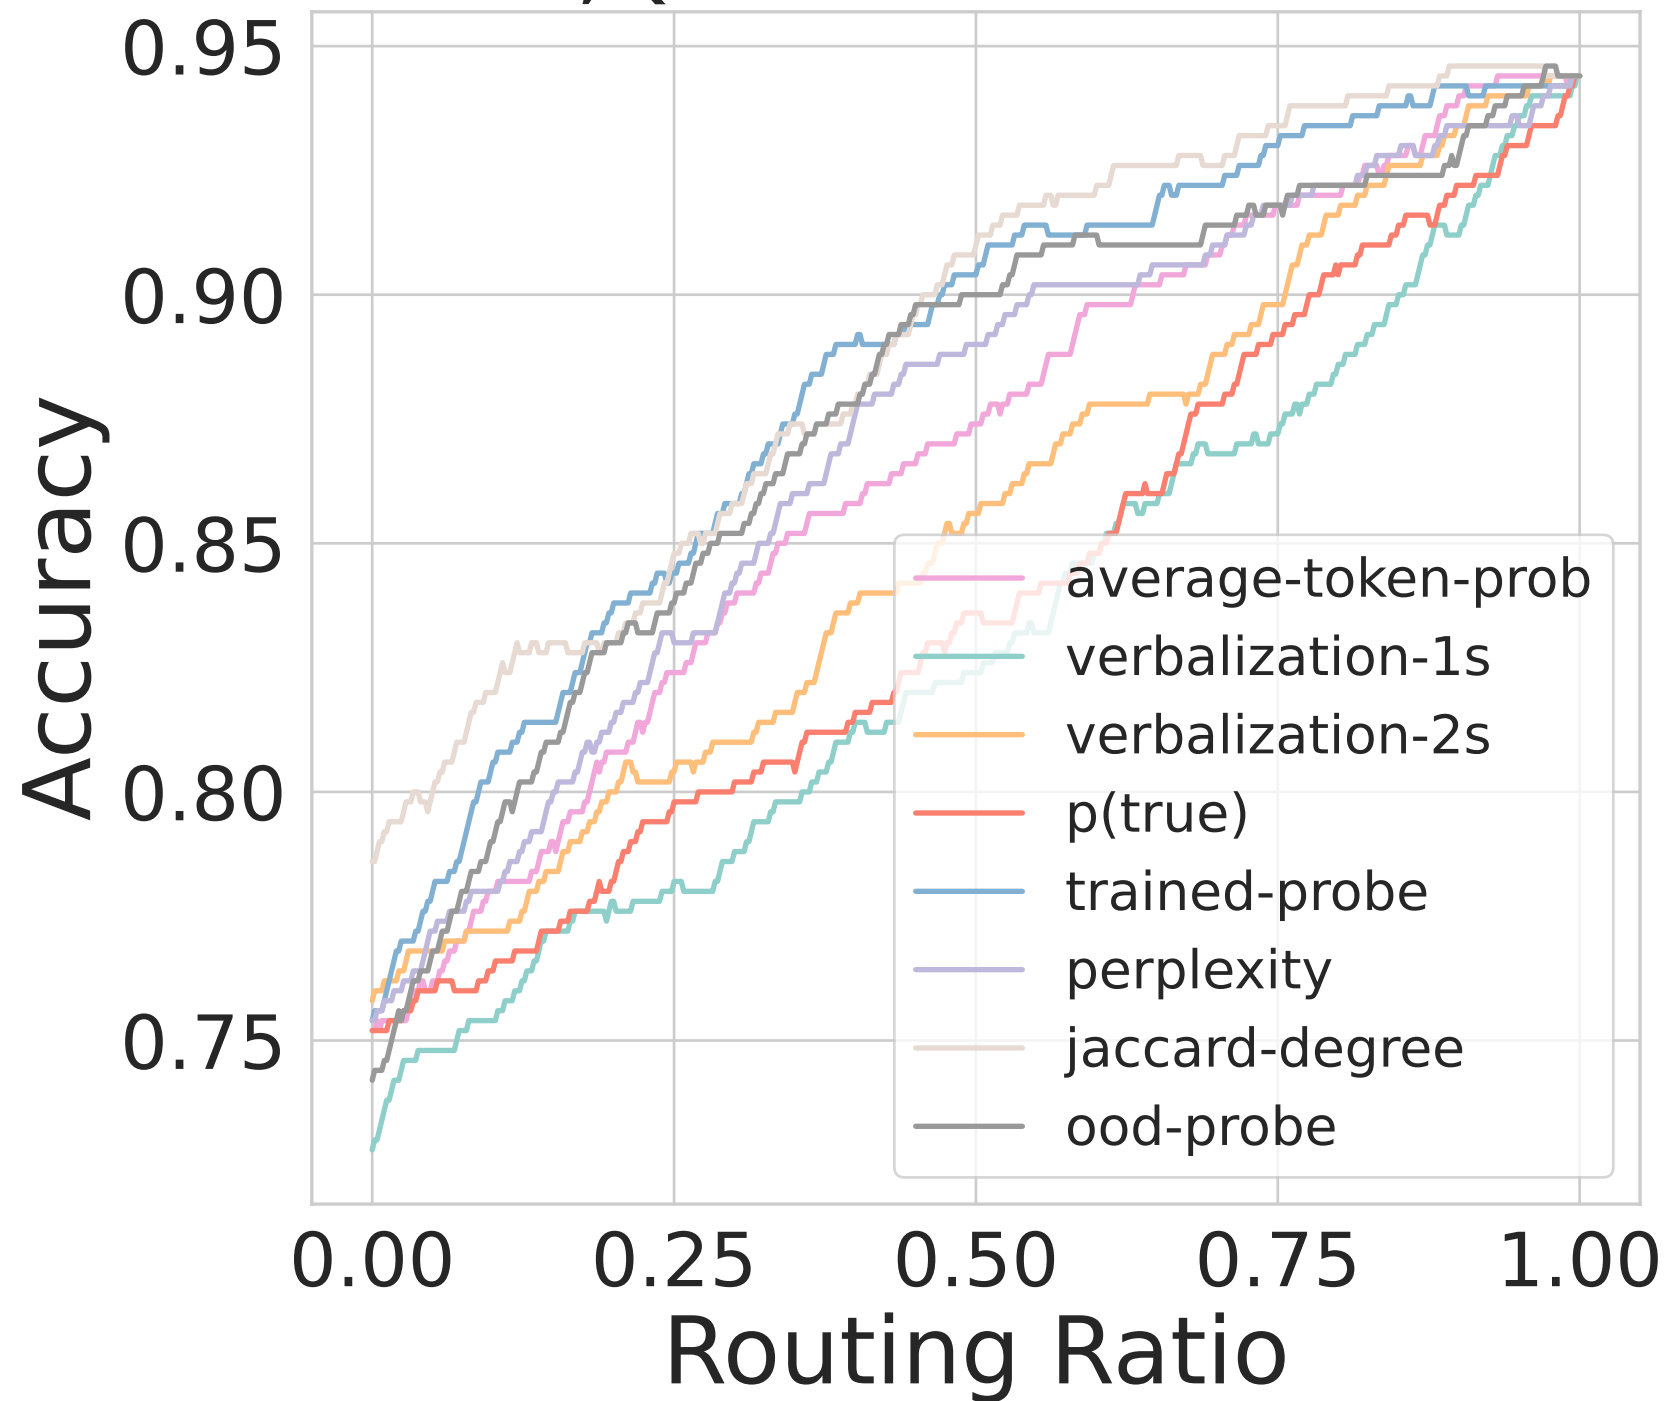

Supplement: supplementary_material [file rr_acc_gsm8k_Qwen3-0.6B_llama70.pdf › Routing_SLM_LLMs/Uncertainty-based Routing/w_legend/to_llama70/rr_acc_gsm8k_Qwen3-0.6B_llama70.pdf]

**GSM8K, Qwen3-1.7B to Llama-3.1-70B**

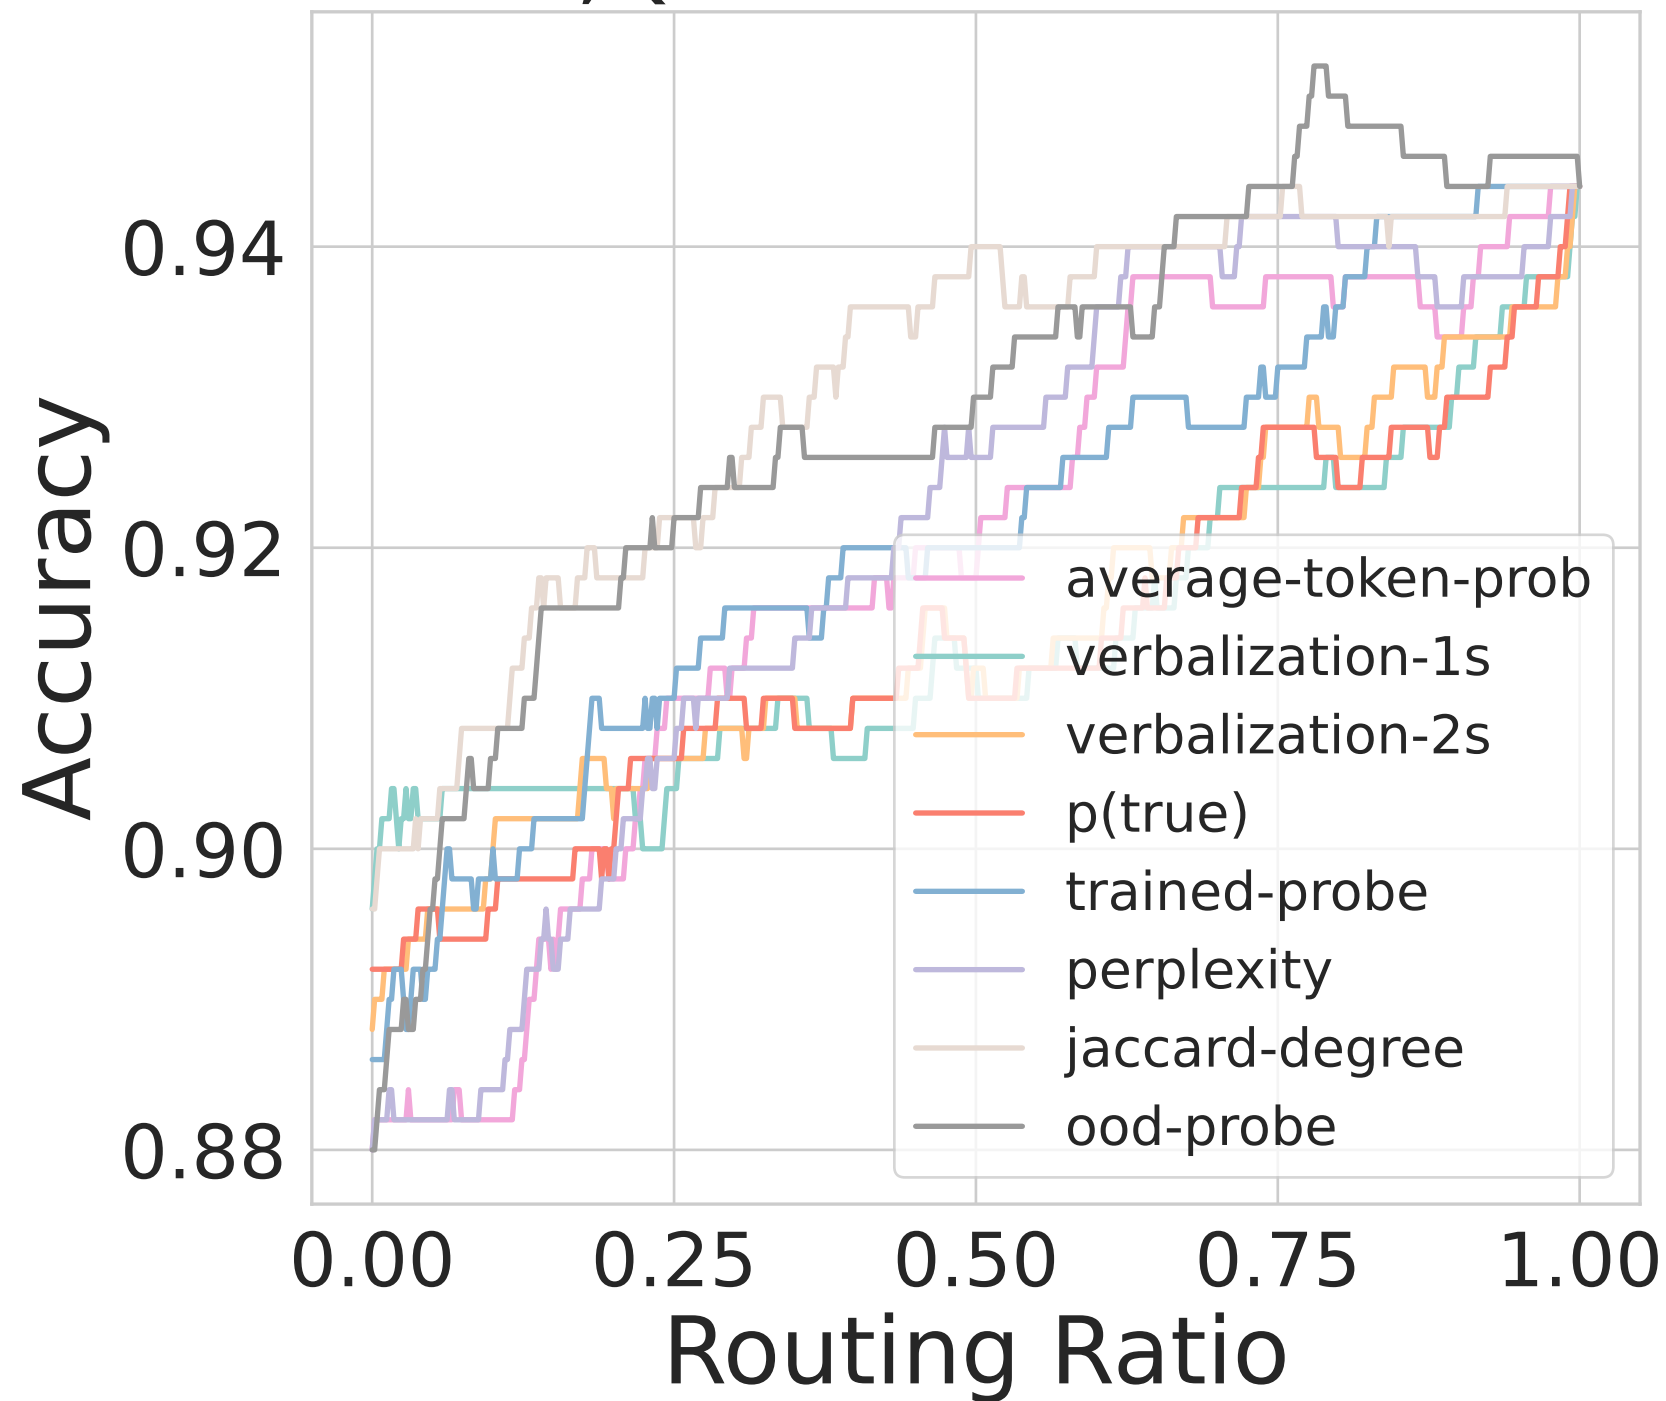

Supplement: supplementary_material [file rr_acc_gsm8k_Qwen3-1.7B_llama70.pdf › Routing_SLM_LLMs/Uncertainty-based Routing/w_legend/to_llama70/rr_acc_gsm8k_Qwen3-1.7B_llama70.pdf]

# GSM8K, Qwen3-4B to Llama-3.1-70B

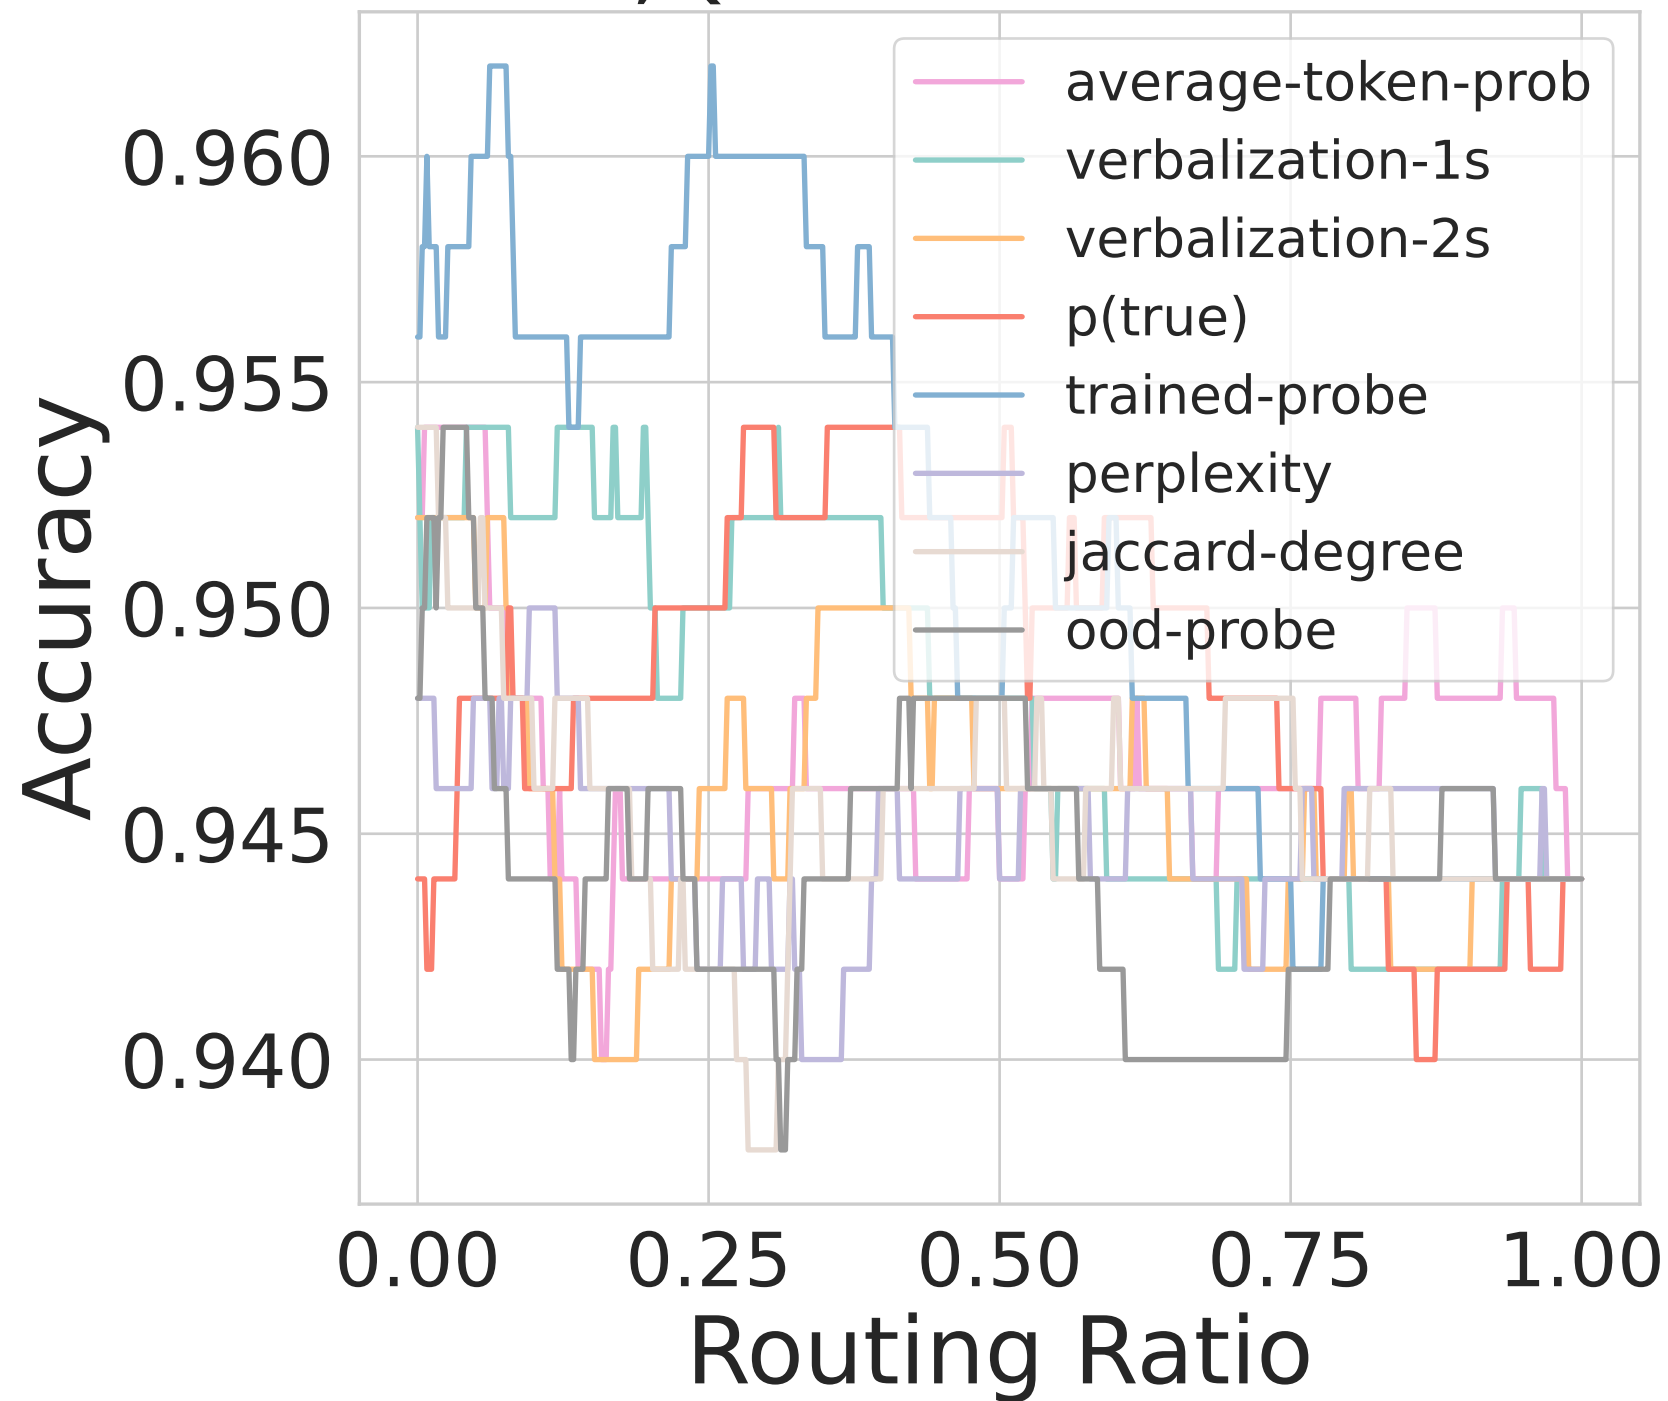

Supplement: supplementary_material [file rr_acc_gsm8k_Qwen3-4B_llama70.pdf › Routing_SLM_LLMs/Uncertainty-based Routing/w_legend/to_llama70/rr_acc_gsm8k_Qwen3-4B_llama70.pdf]

**GSM8K, granite-3.1-8b to Llama-3.1-70B**

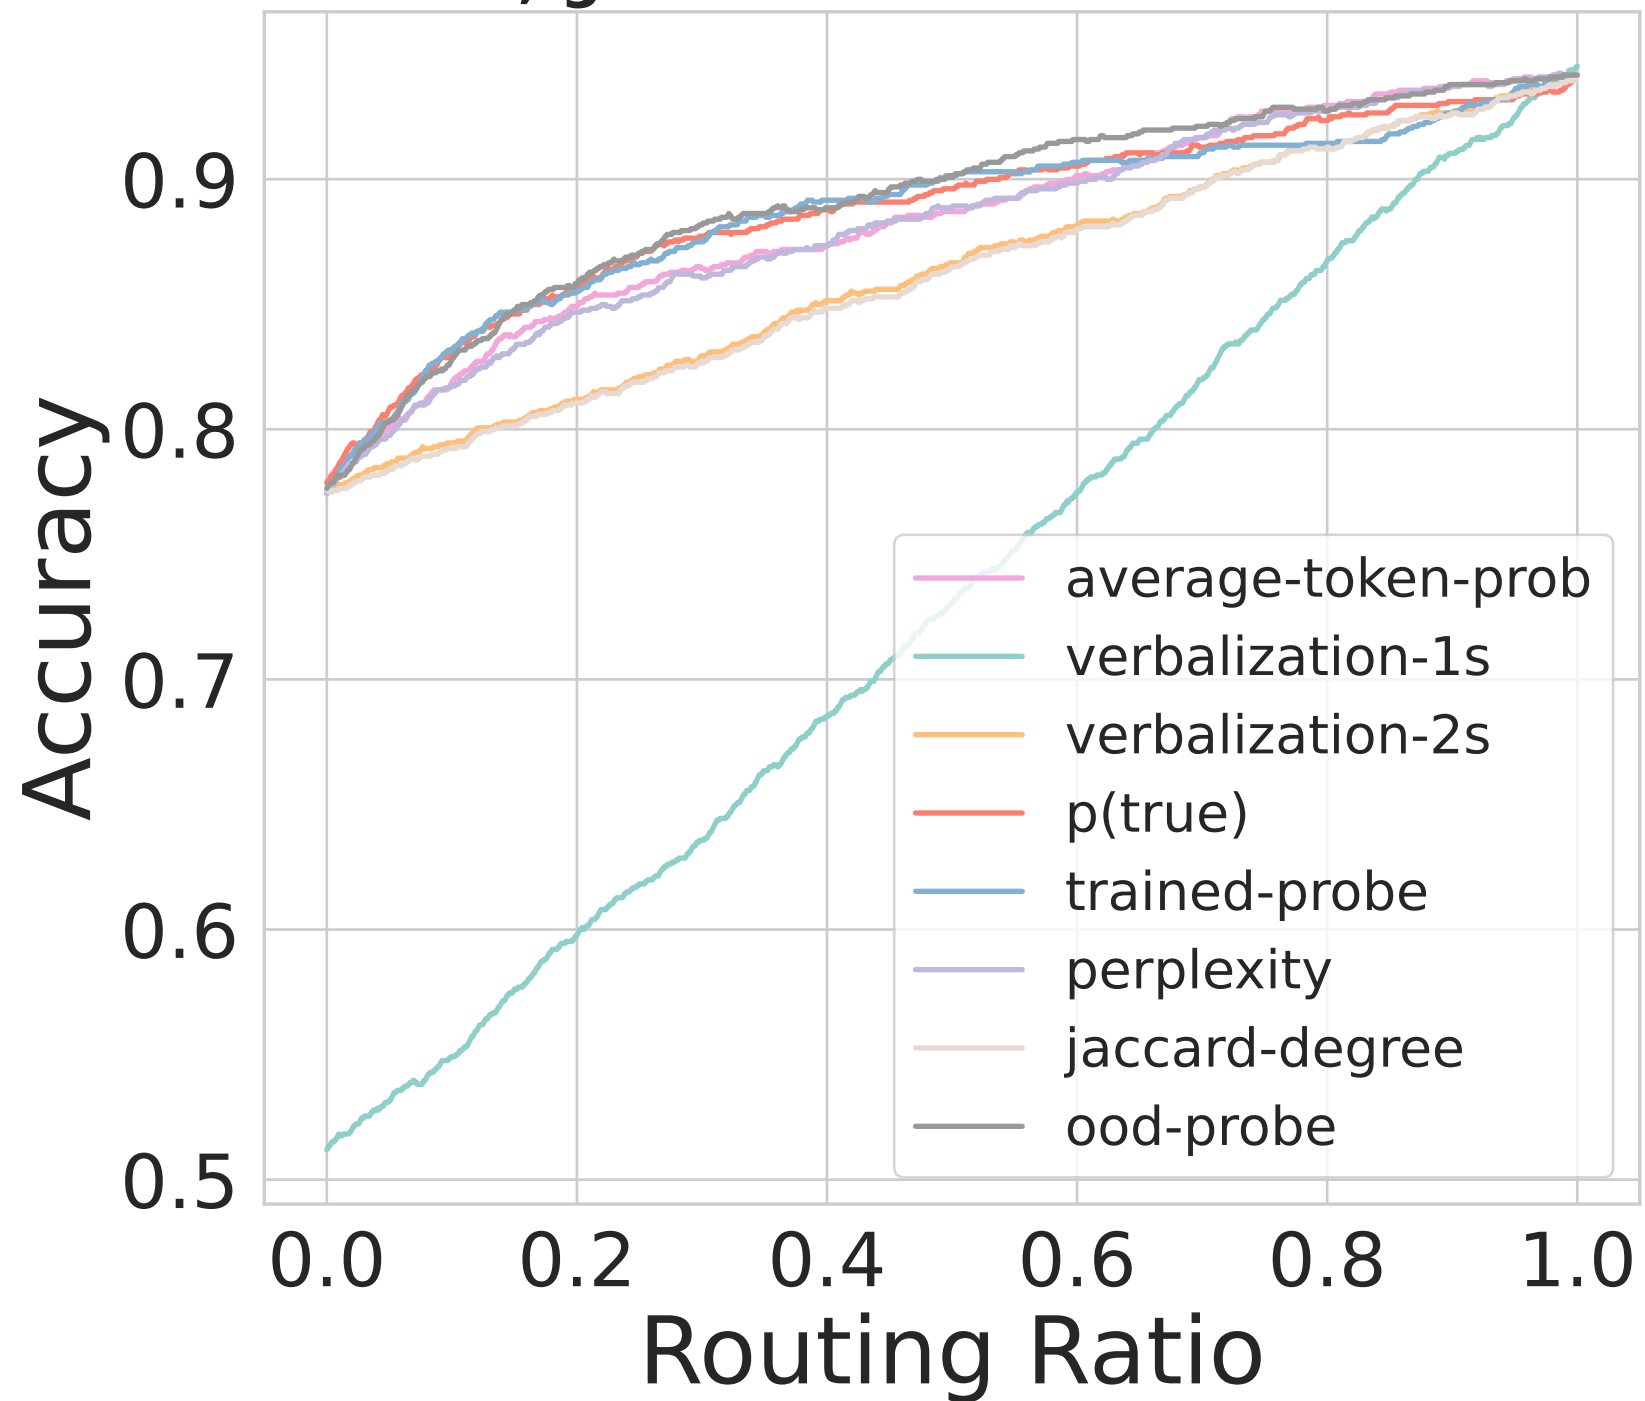

Supplement: supplementary_material [file rr_acc_gsm8k_granite-3.1-8b_llama70.pdf › Routing_SLM_LLMs/Uncertainty-based Routing/w_legend/to_llama70/rr_acc_gsm8k_granite-3.1-8b_llama70.pdf]

# GSM8K, llama-3.1-8b to Llama-3.1-70B

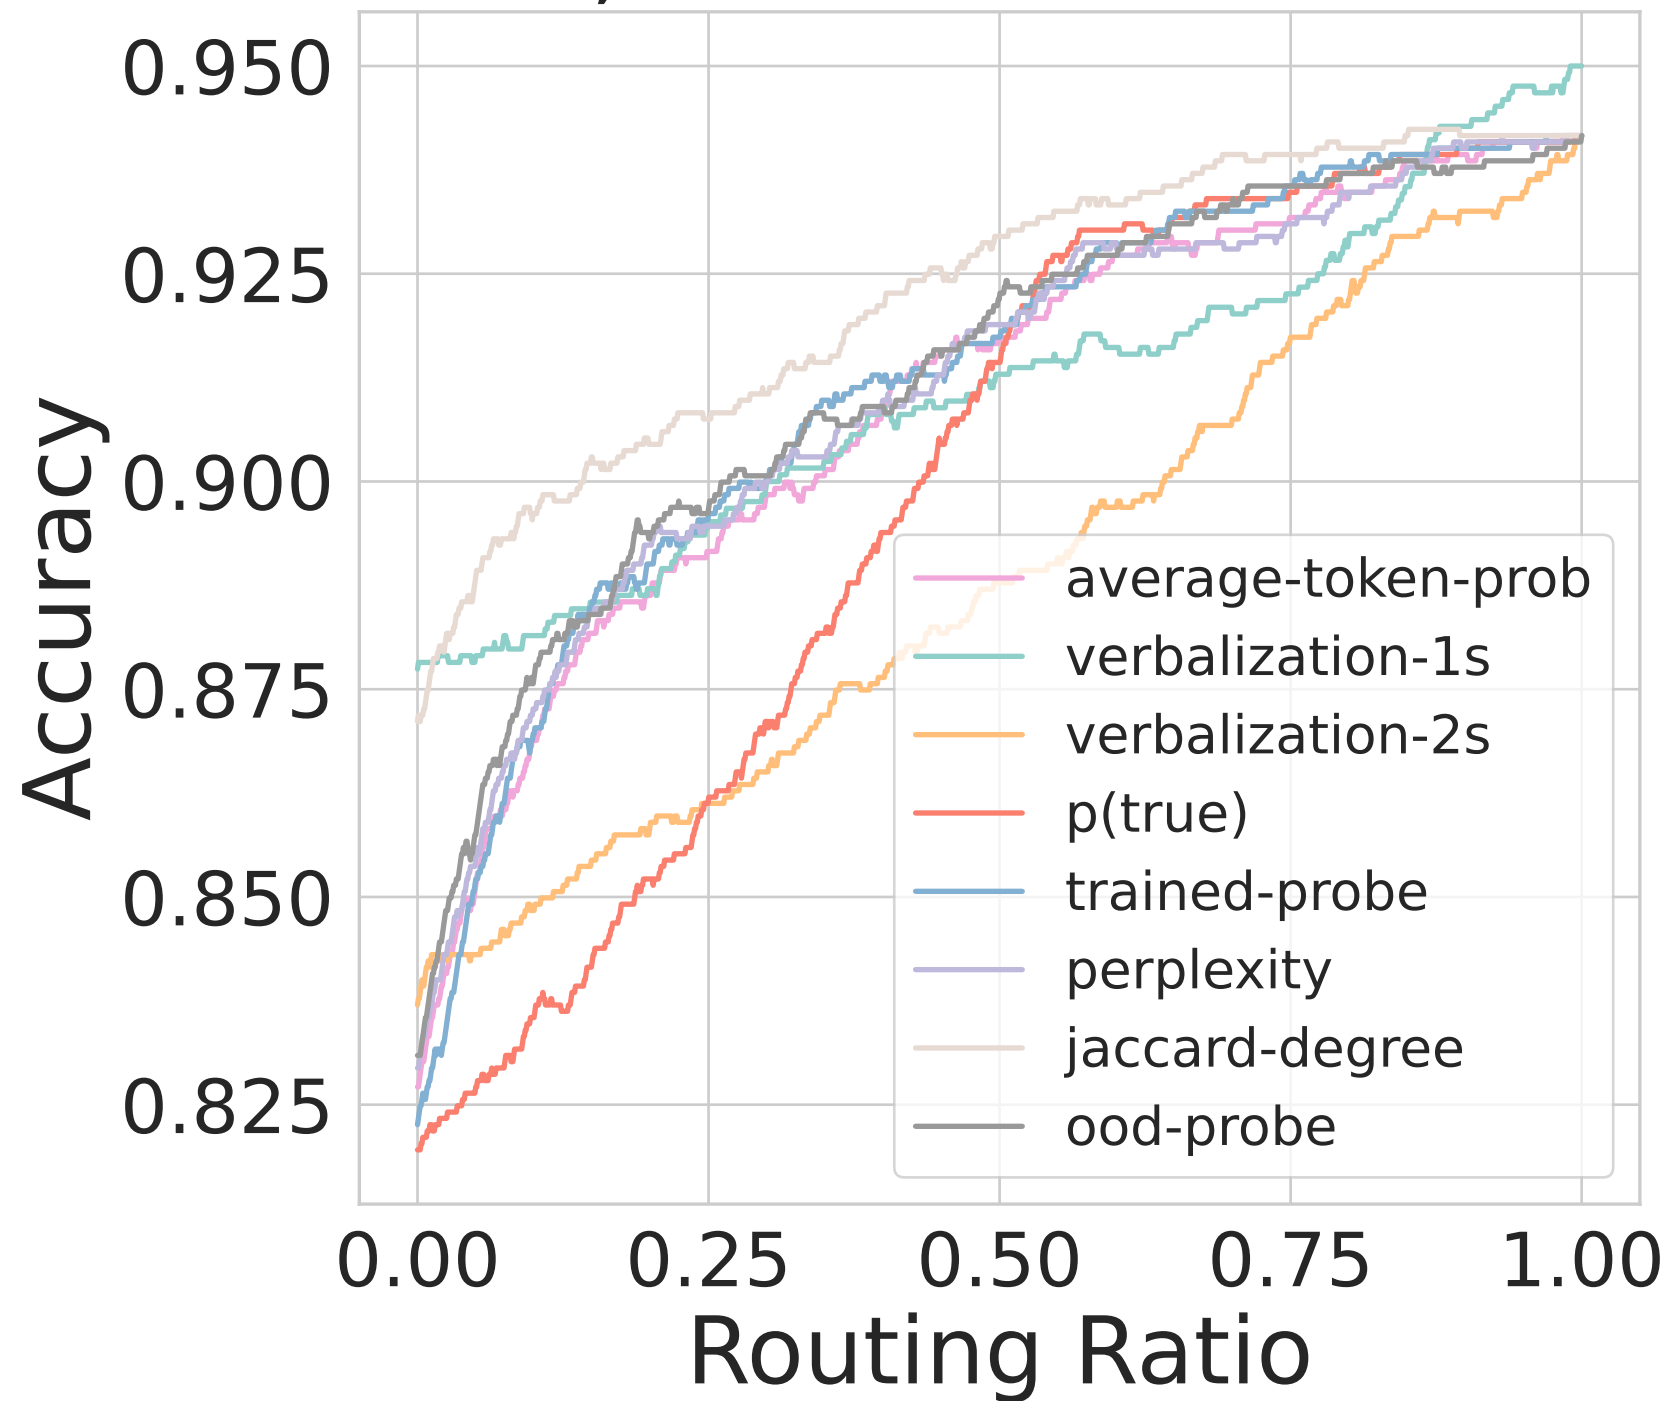

Supplement: supplementary_material [file rr_acc_gsm8k_llama-3.1-8b_llama70.pdf › Routing_SLM_LLMs/Uncertainty-based Routing/w_legend/to_llama70/rr_acc_gsm8k_llama-3.1-8b_llama70.pdf]

## GSM8K, llama-3.2-1b to Llama-3.1-70B

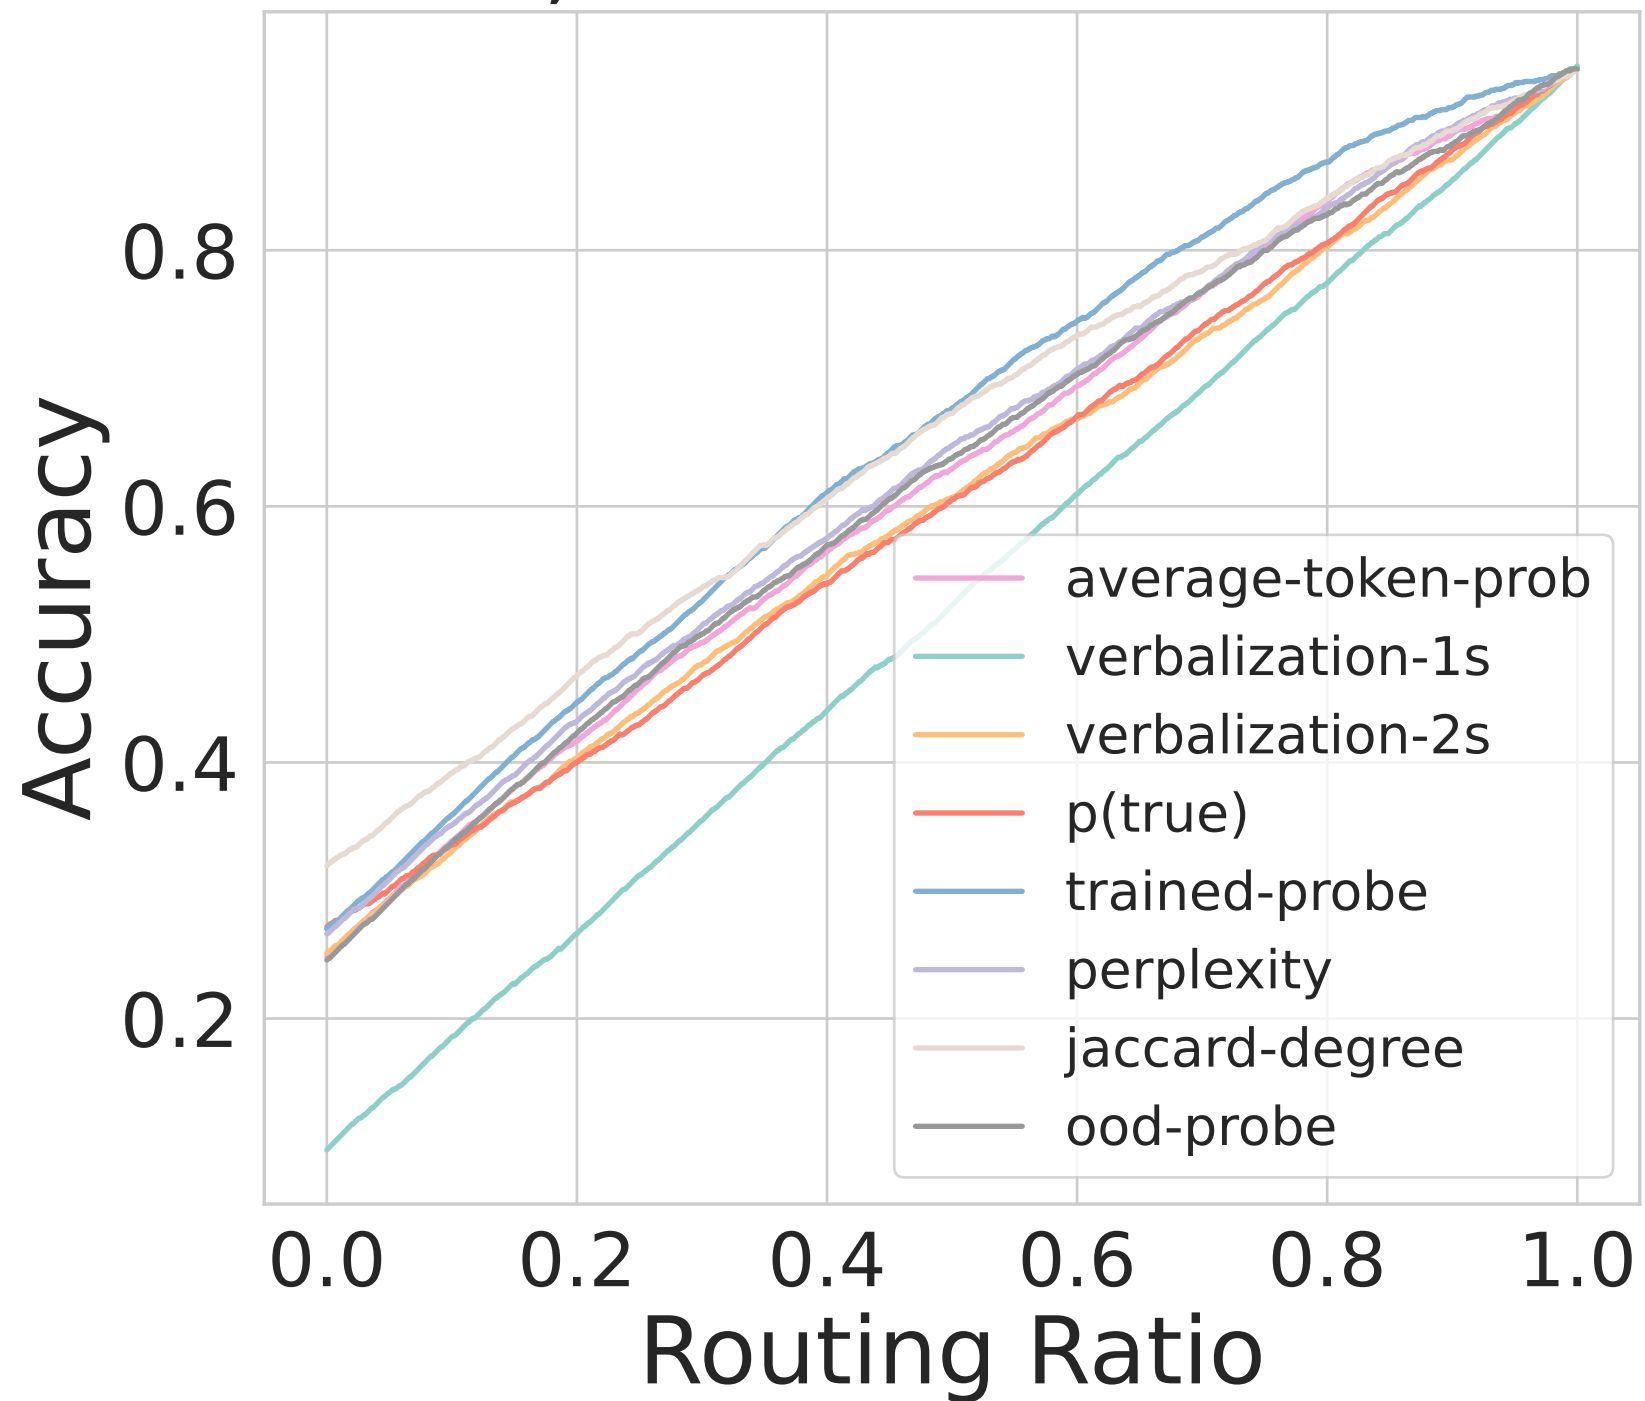

Supplement: supplementary_material [file rr_acc_gsm8k_llama-3.2-1b_llama70.pdf › Routing_SLM_LLMs/Uncertainty-based Routing/w_legend/to_llama70/rr_acc_gsm8k_llama-3.2-1b_llama70.pdf]

**GSM8K, llama-3.2-3b to Llama-3.1-70B**

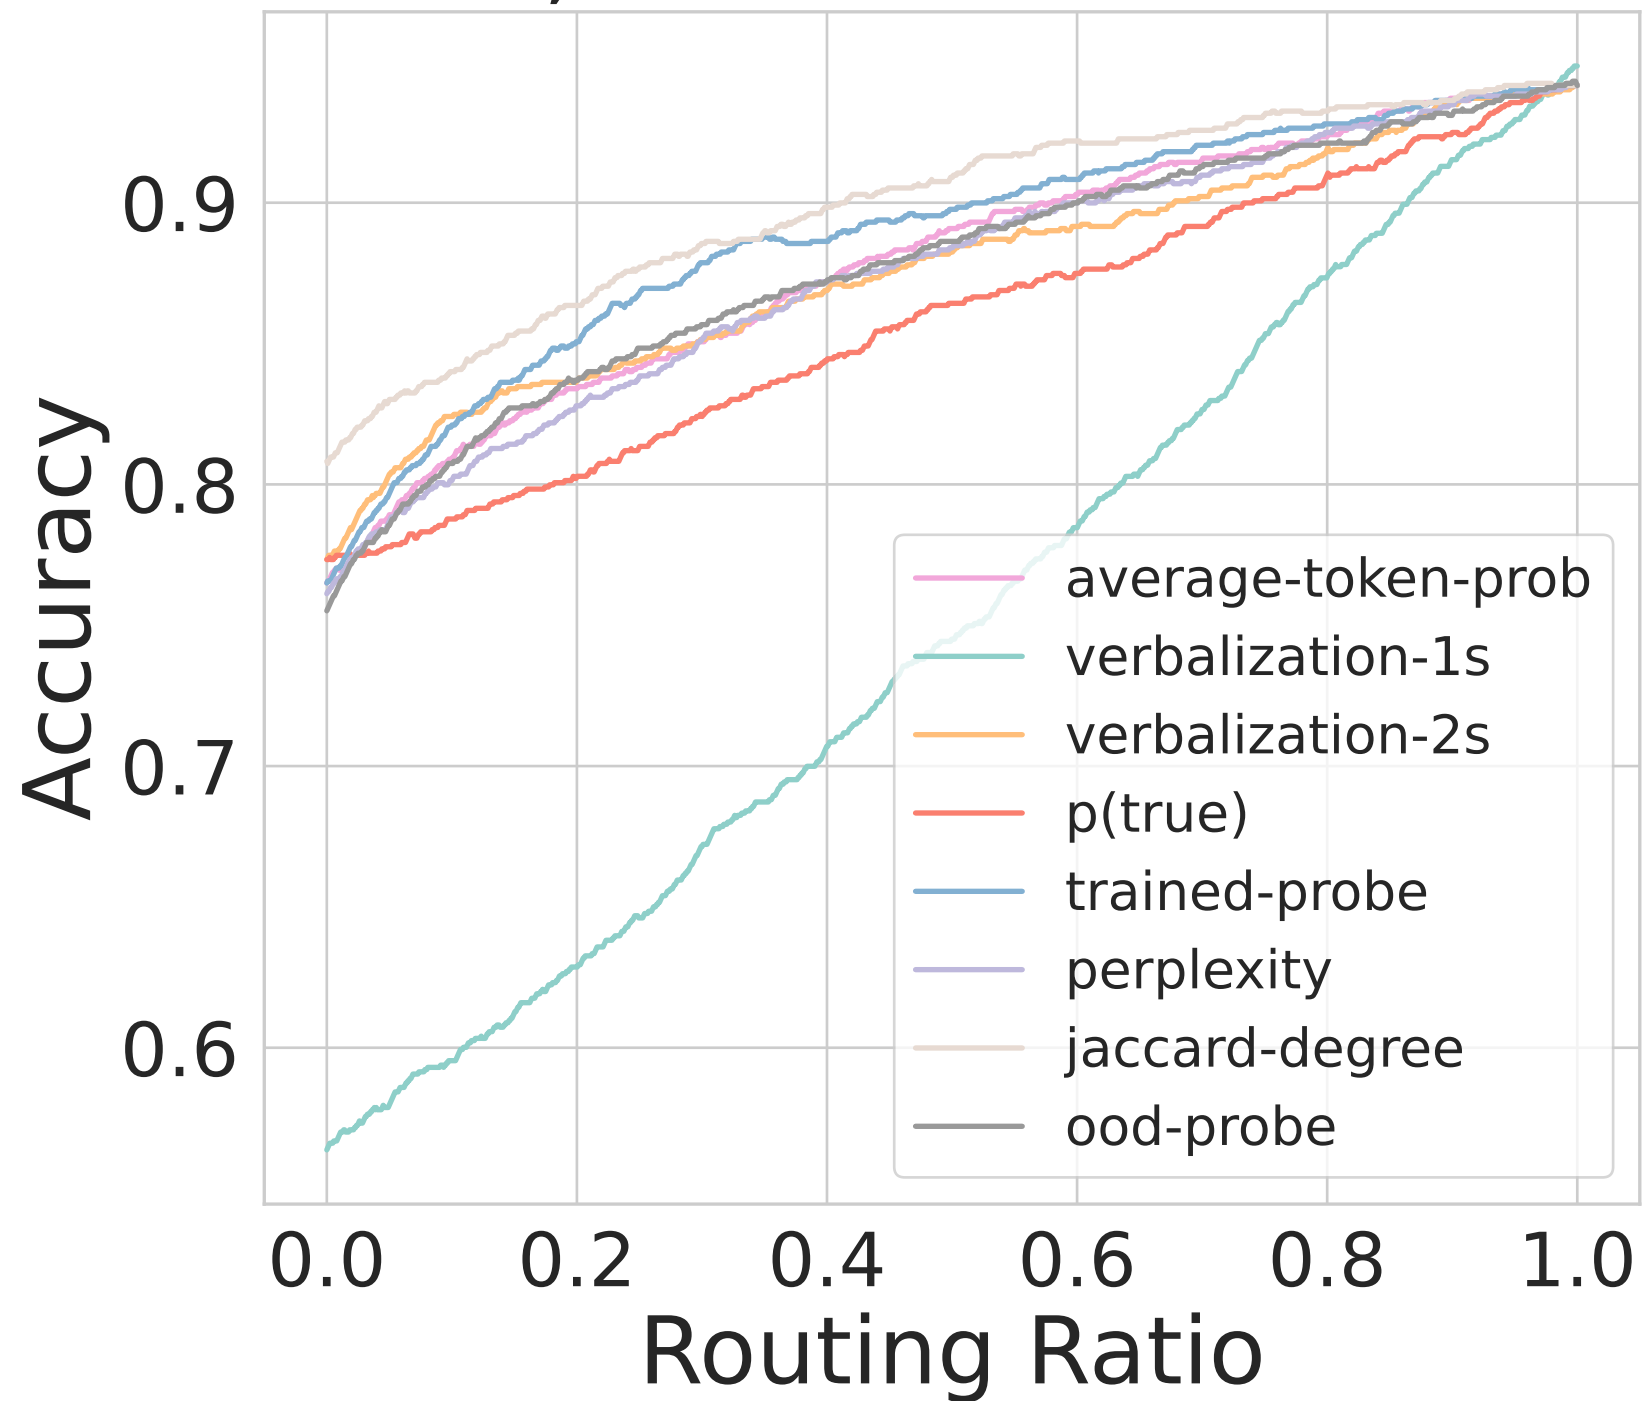

Supplement: supplementary_material [file rr_acc_gsm8k_llama-3.2-3b_llama70.pdf › Routing_SLM_LLMs/Uncertainty-based Routing/w_legend/to_llama70/rr_acc_gsm8k_llama-3.2-3b_llama70.pdf]

# GSM8K, mistral-7b to Llama-3.1-70B

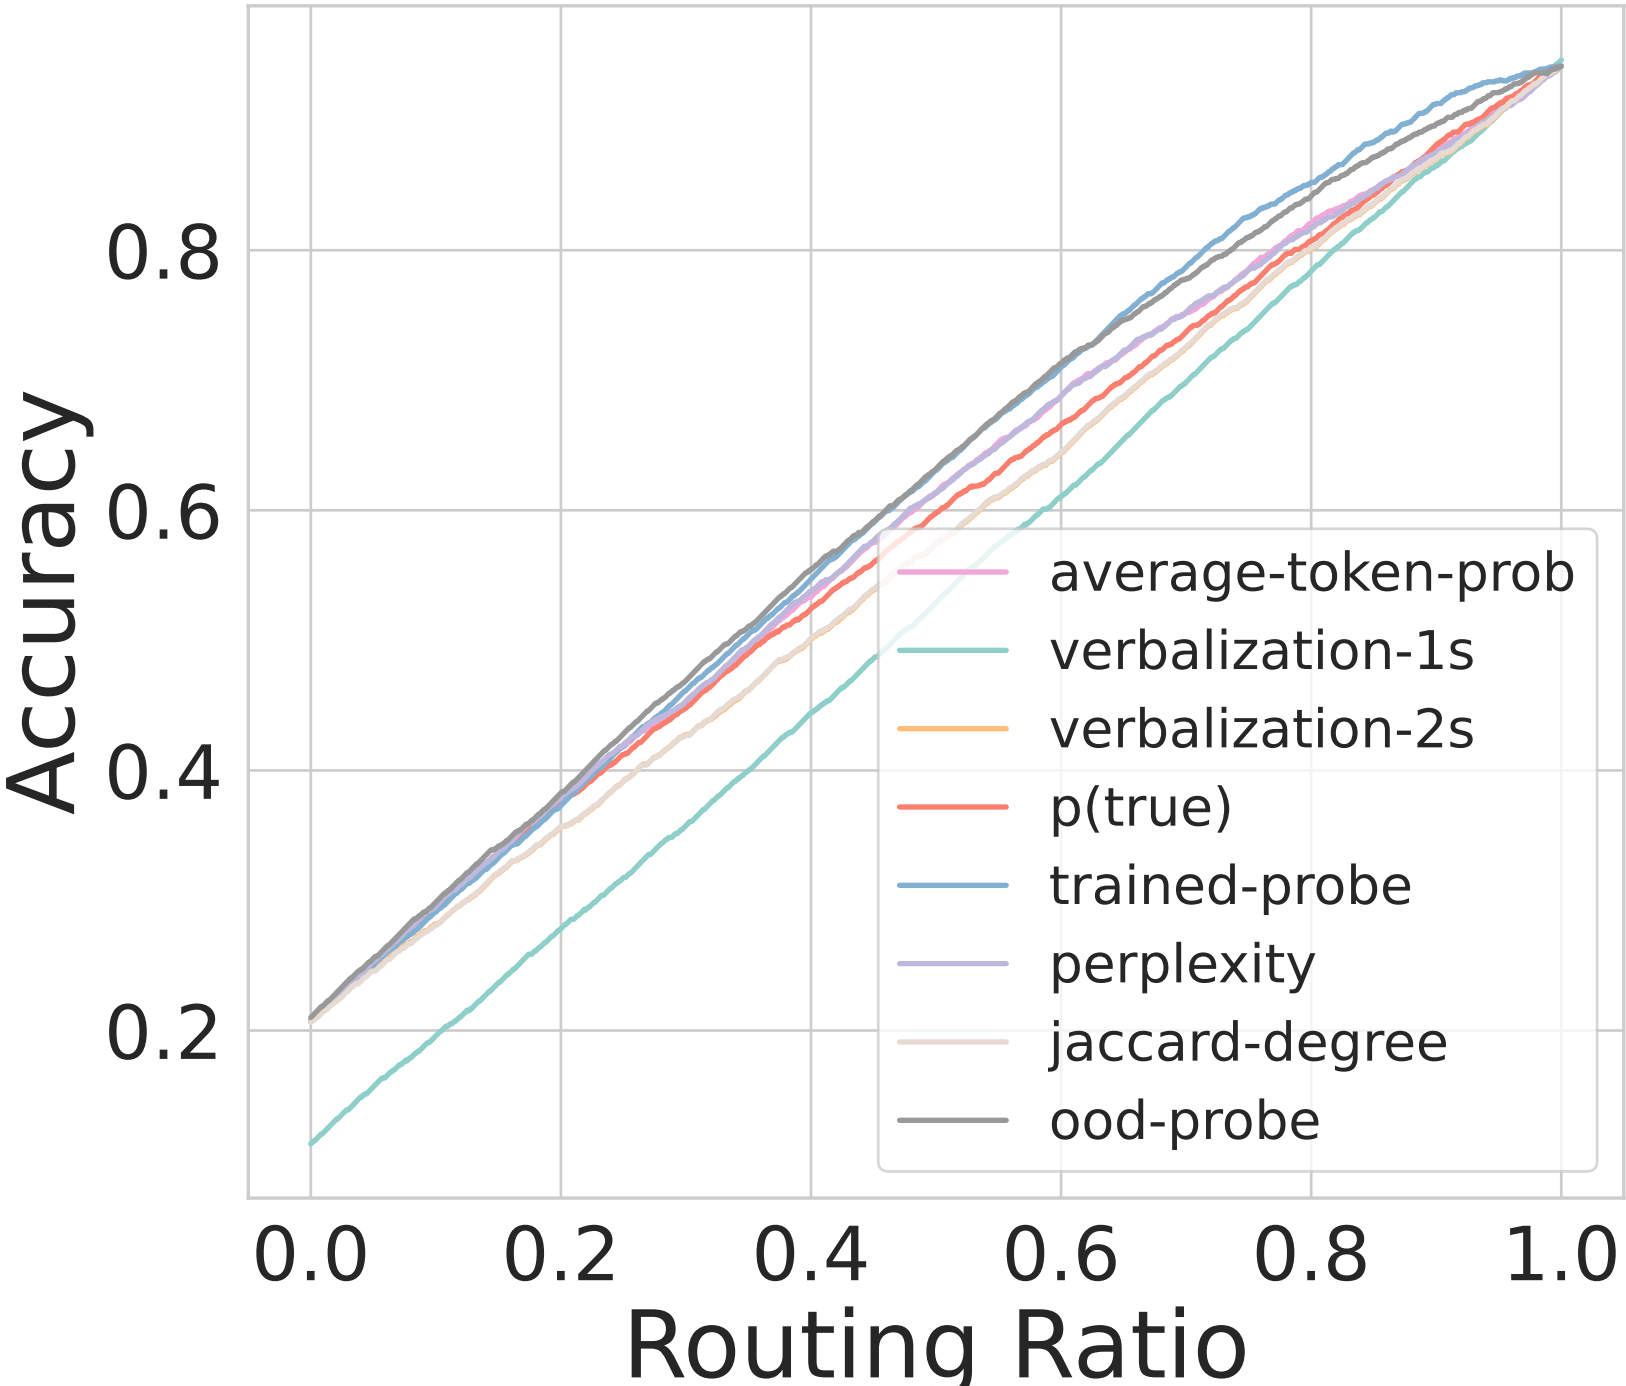

Supplement: supplementary_material [file rr_acc_gsm8k_mistral-7b_llama70.pdf › Routing_SLM_LLMs/Uncertainty-based Routing/w_legend/to_llama70/rr_acc_gsm8k_mistral-7b_llama70.pdf]

# GSM8K, phi-3.5-mini to Llama-3.1-70B

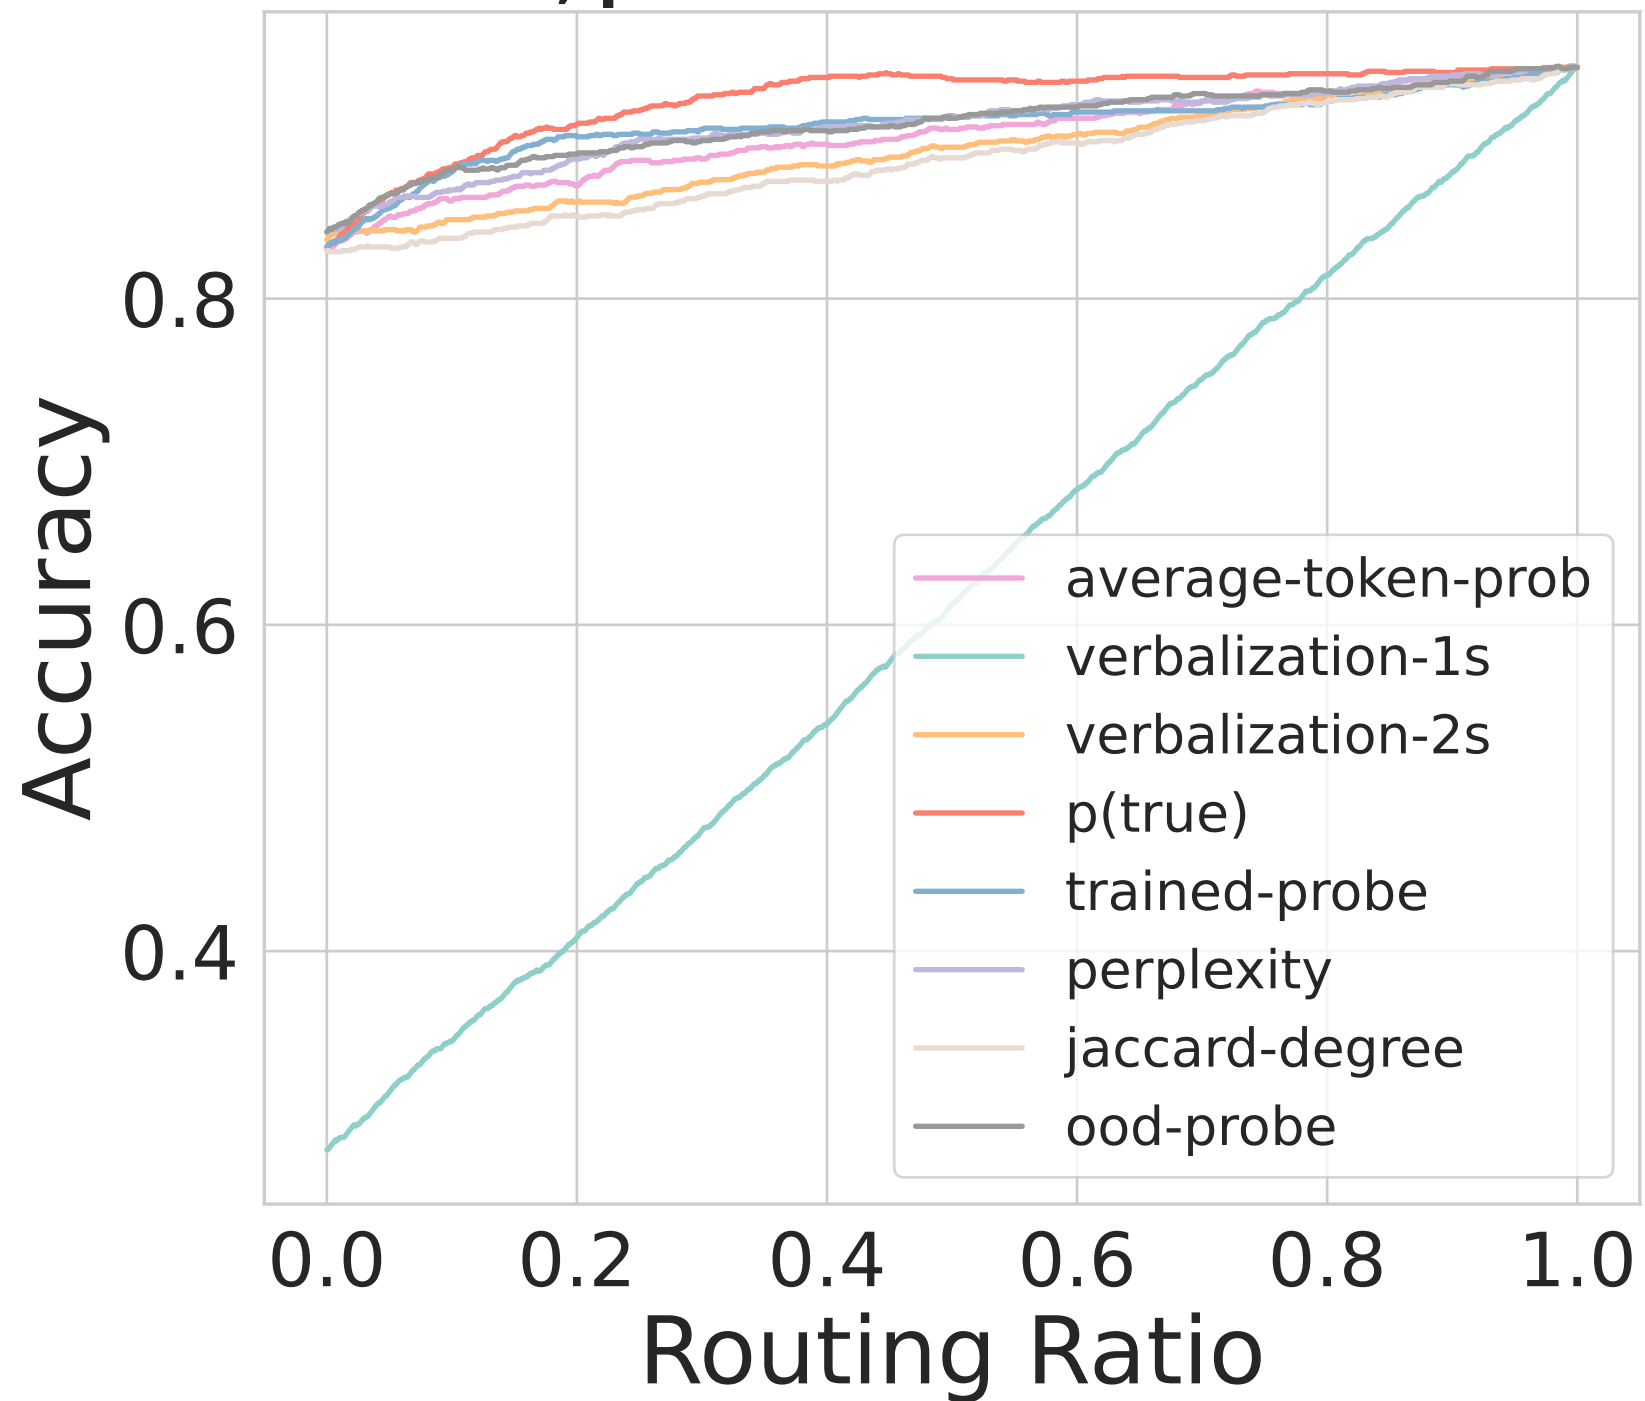

Supplement: supplementary_material [file rr_acc_gsm8k_phi-3.5-mini_llama70.pdf › Routing_SLM_LLMs/Uncertainty-based Routing/w_legend/to_llama70/rr_acc_gsm8k_phi-3.5-mini_llama70.pdf]

# GSM8K, rwkv to Llama-3.1-70B

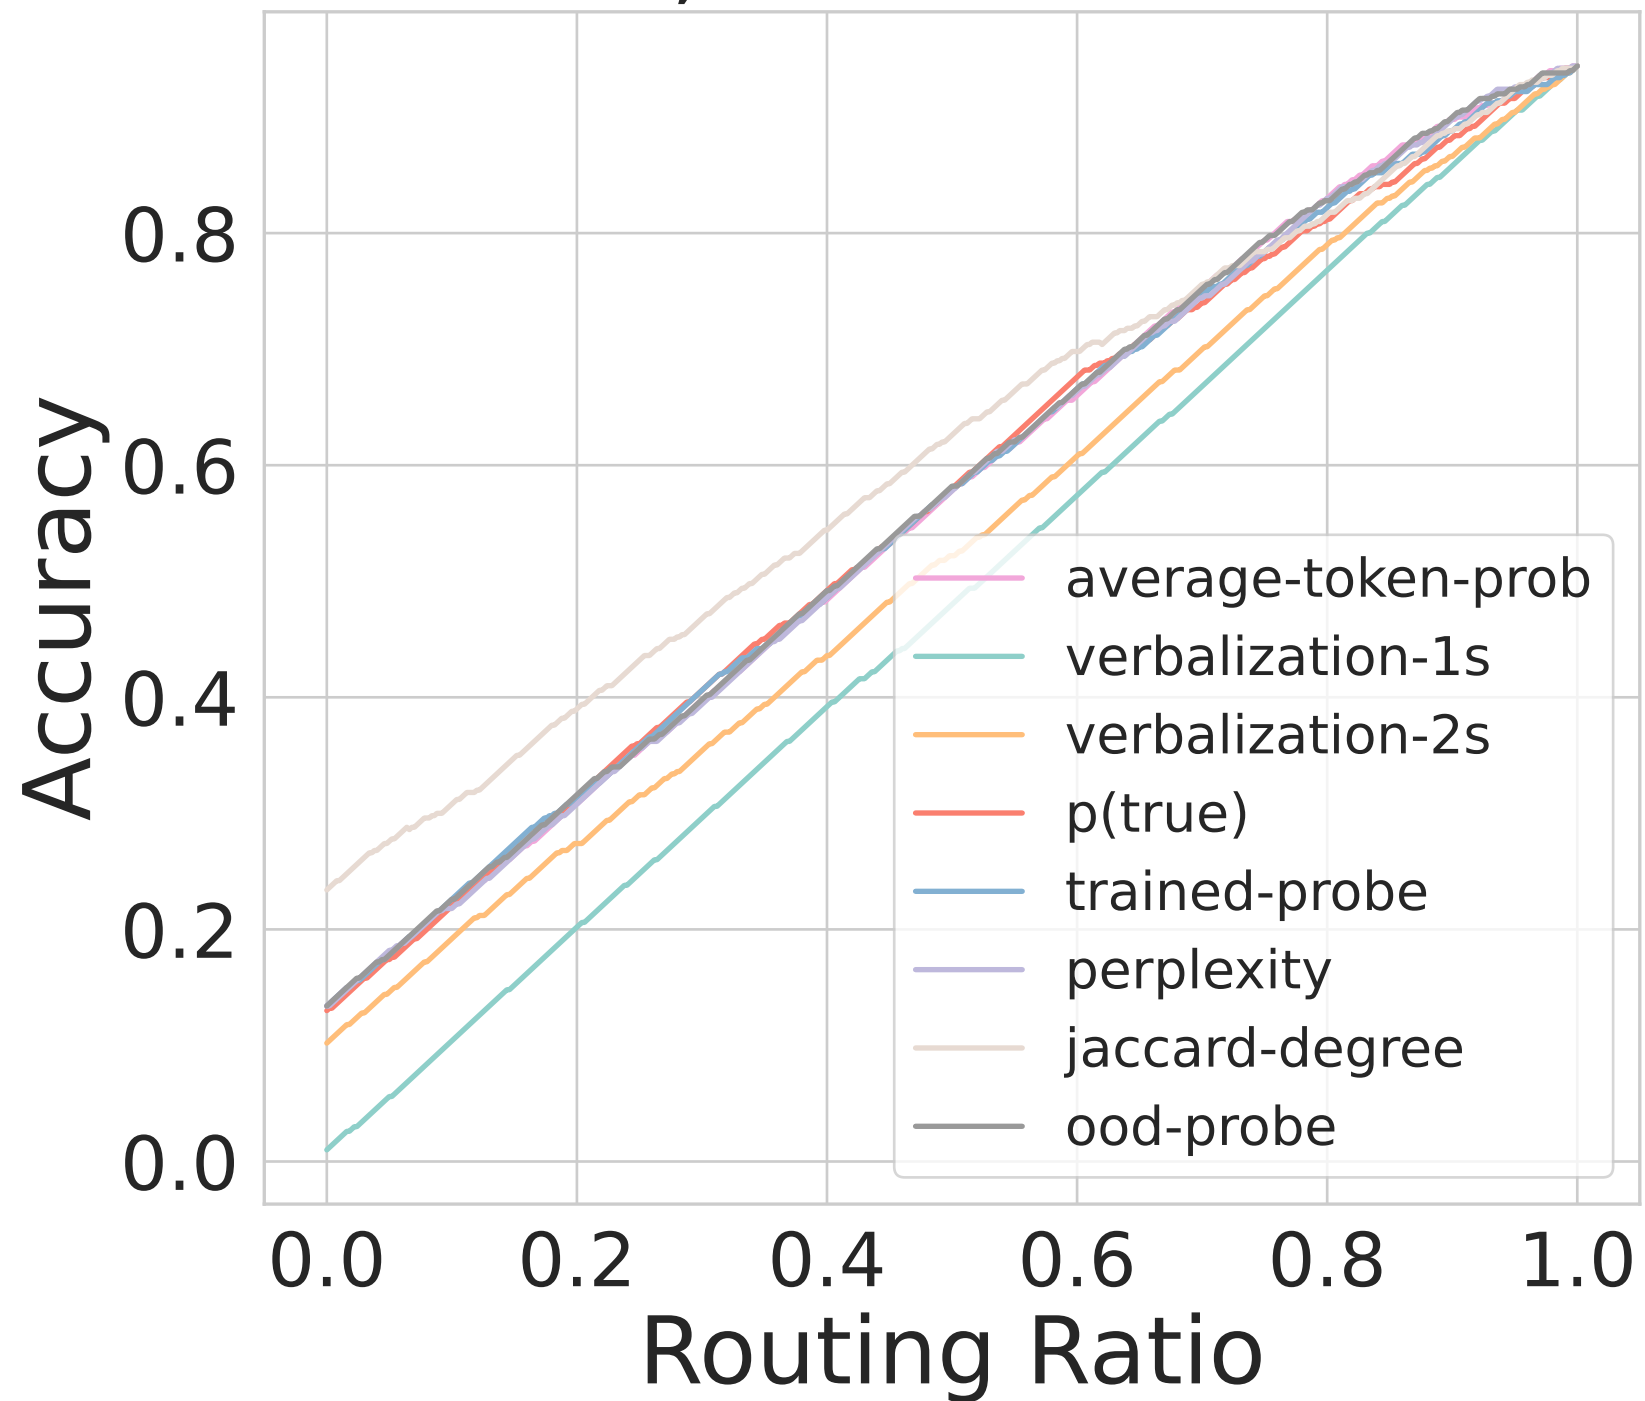

Supplement: supplementary_material [file rr_acc_gsm8k_rwkv_llama70.pdf › Routing_SLM_LLMs/Uncertainty-based Routing/w_legend/to_llama70/rr_acc_gsm8k_rwkv_llama70.pdf]

# HellaSwag, Qwen3-1.7B to Llama-3.1-70B

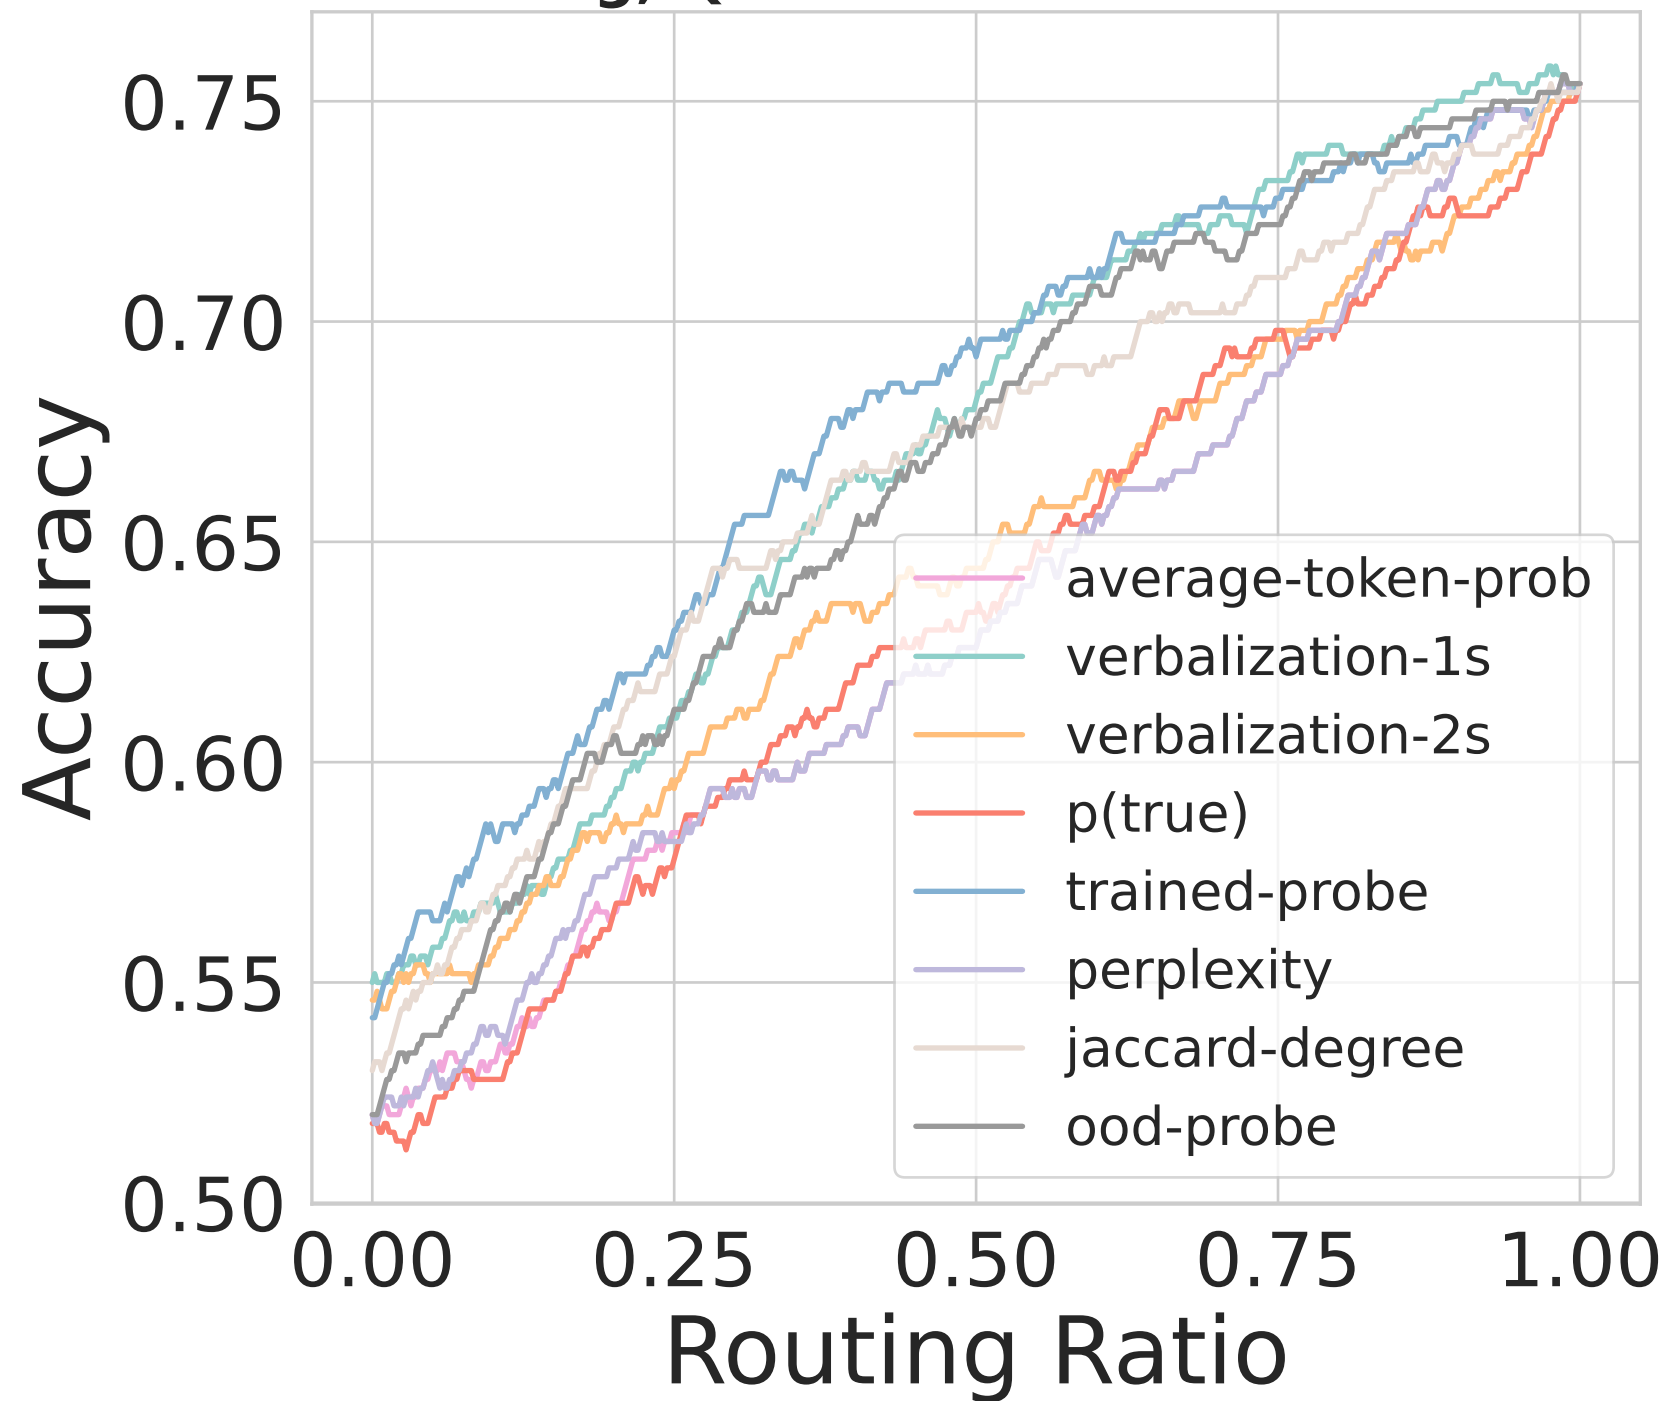

Supplement: supplementary_material [file rr_acc_hellaswag_Qwen3-1.7B_llama70.pdf › Routing_SLM_LLMs/Uncertainty-based Routing/w_legend/to_llama70/rr_acc_hellaswag_Qwen3-1.7B_llama70.pdf]

# HellaSwag, Qwen3-4B to Llama-3.1-70B

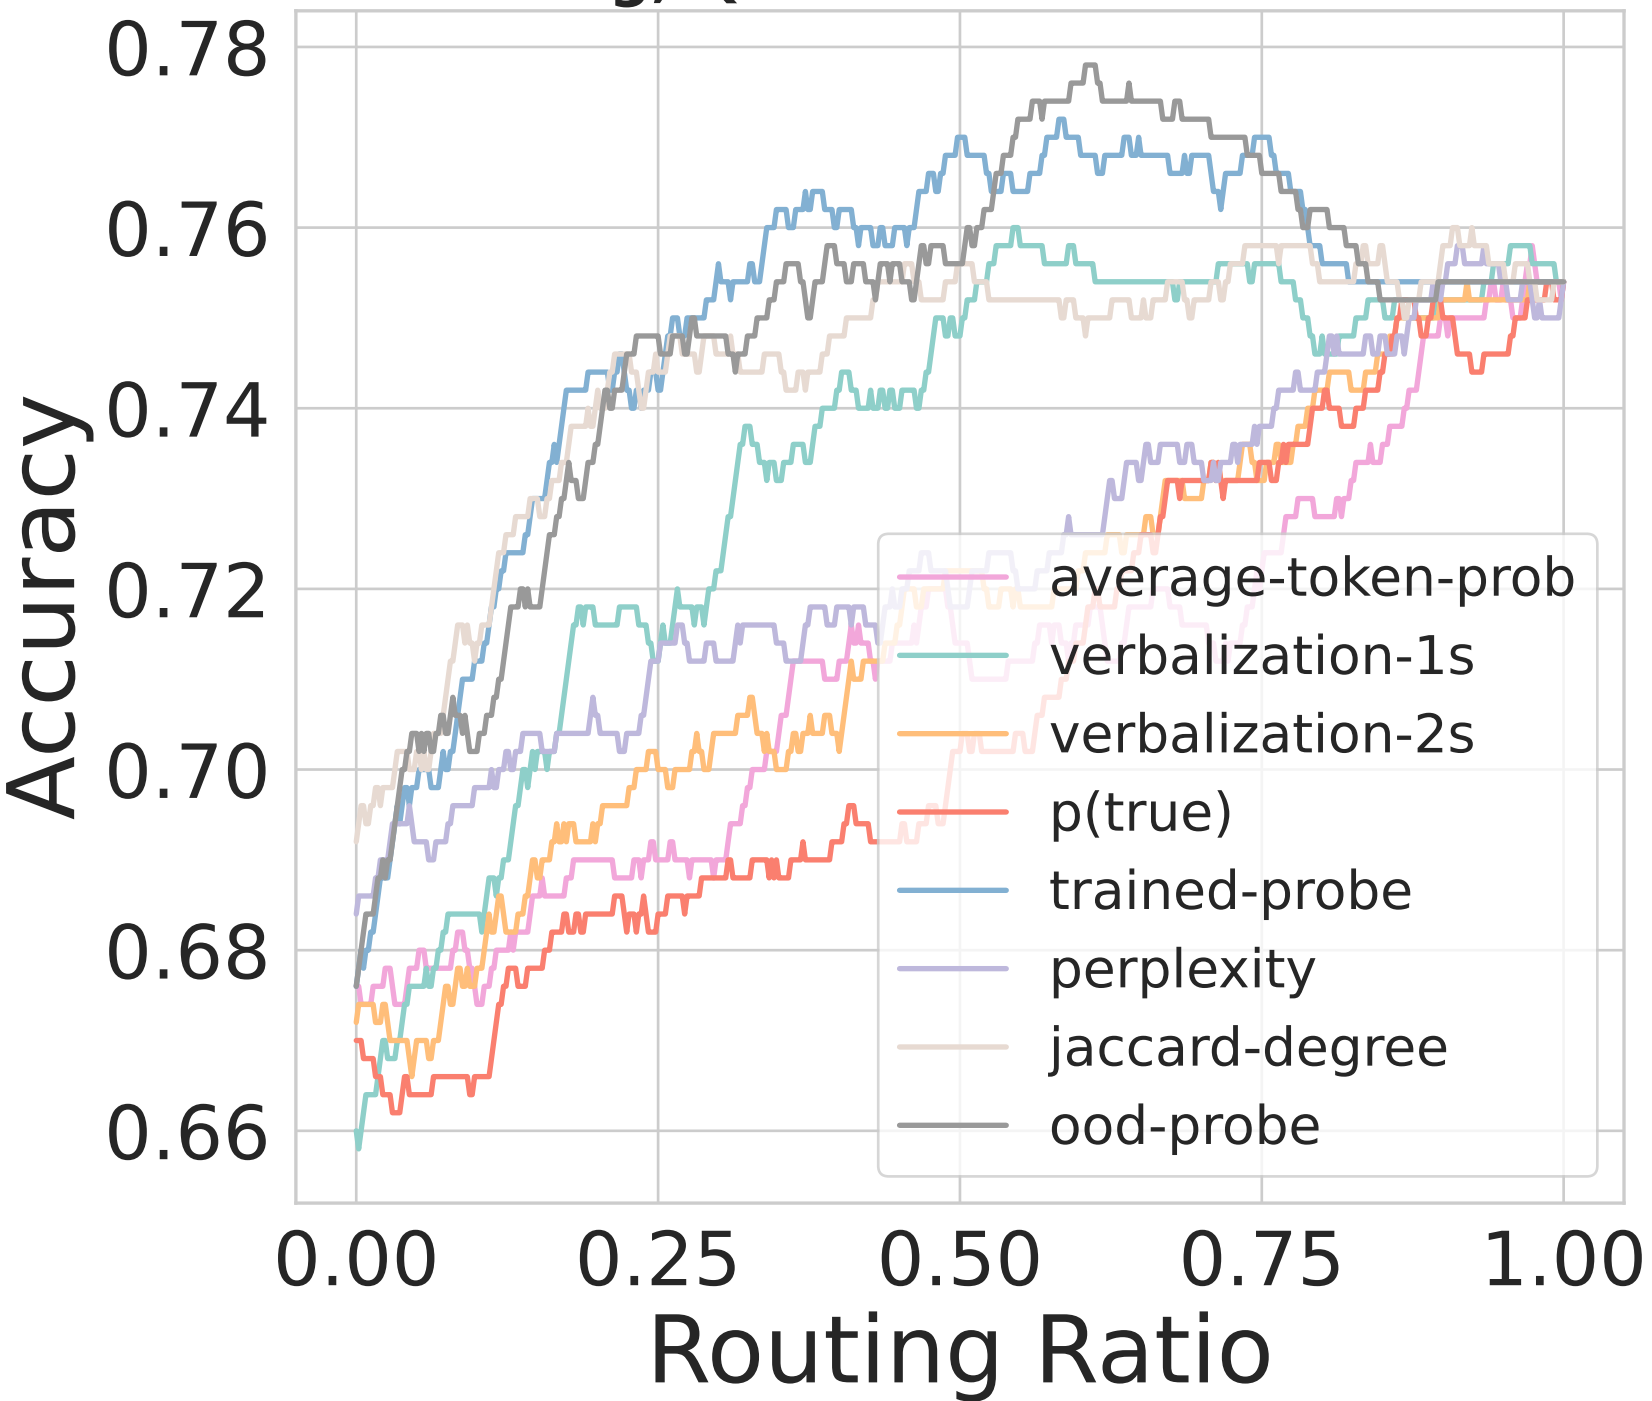

Supplement: supplementary_material [file rr_acc_hellaswag_Qwen3-4B_llama70.pdf › Routing_SLM_LLMs/Uncertainty-based Routing/w_legend/to_llama70/rr_acc_hellaswag_Qwen3-4B_llama70.pdf]

**HellaSwag, granite-3.1-8b to Llama-3.1-70B**

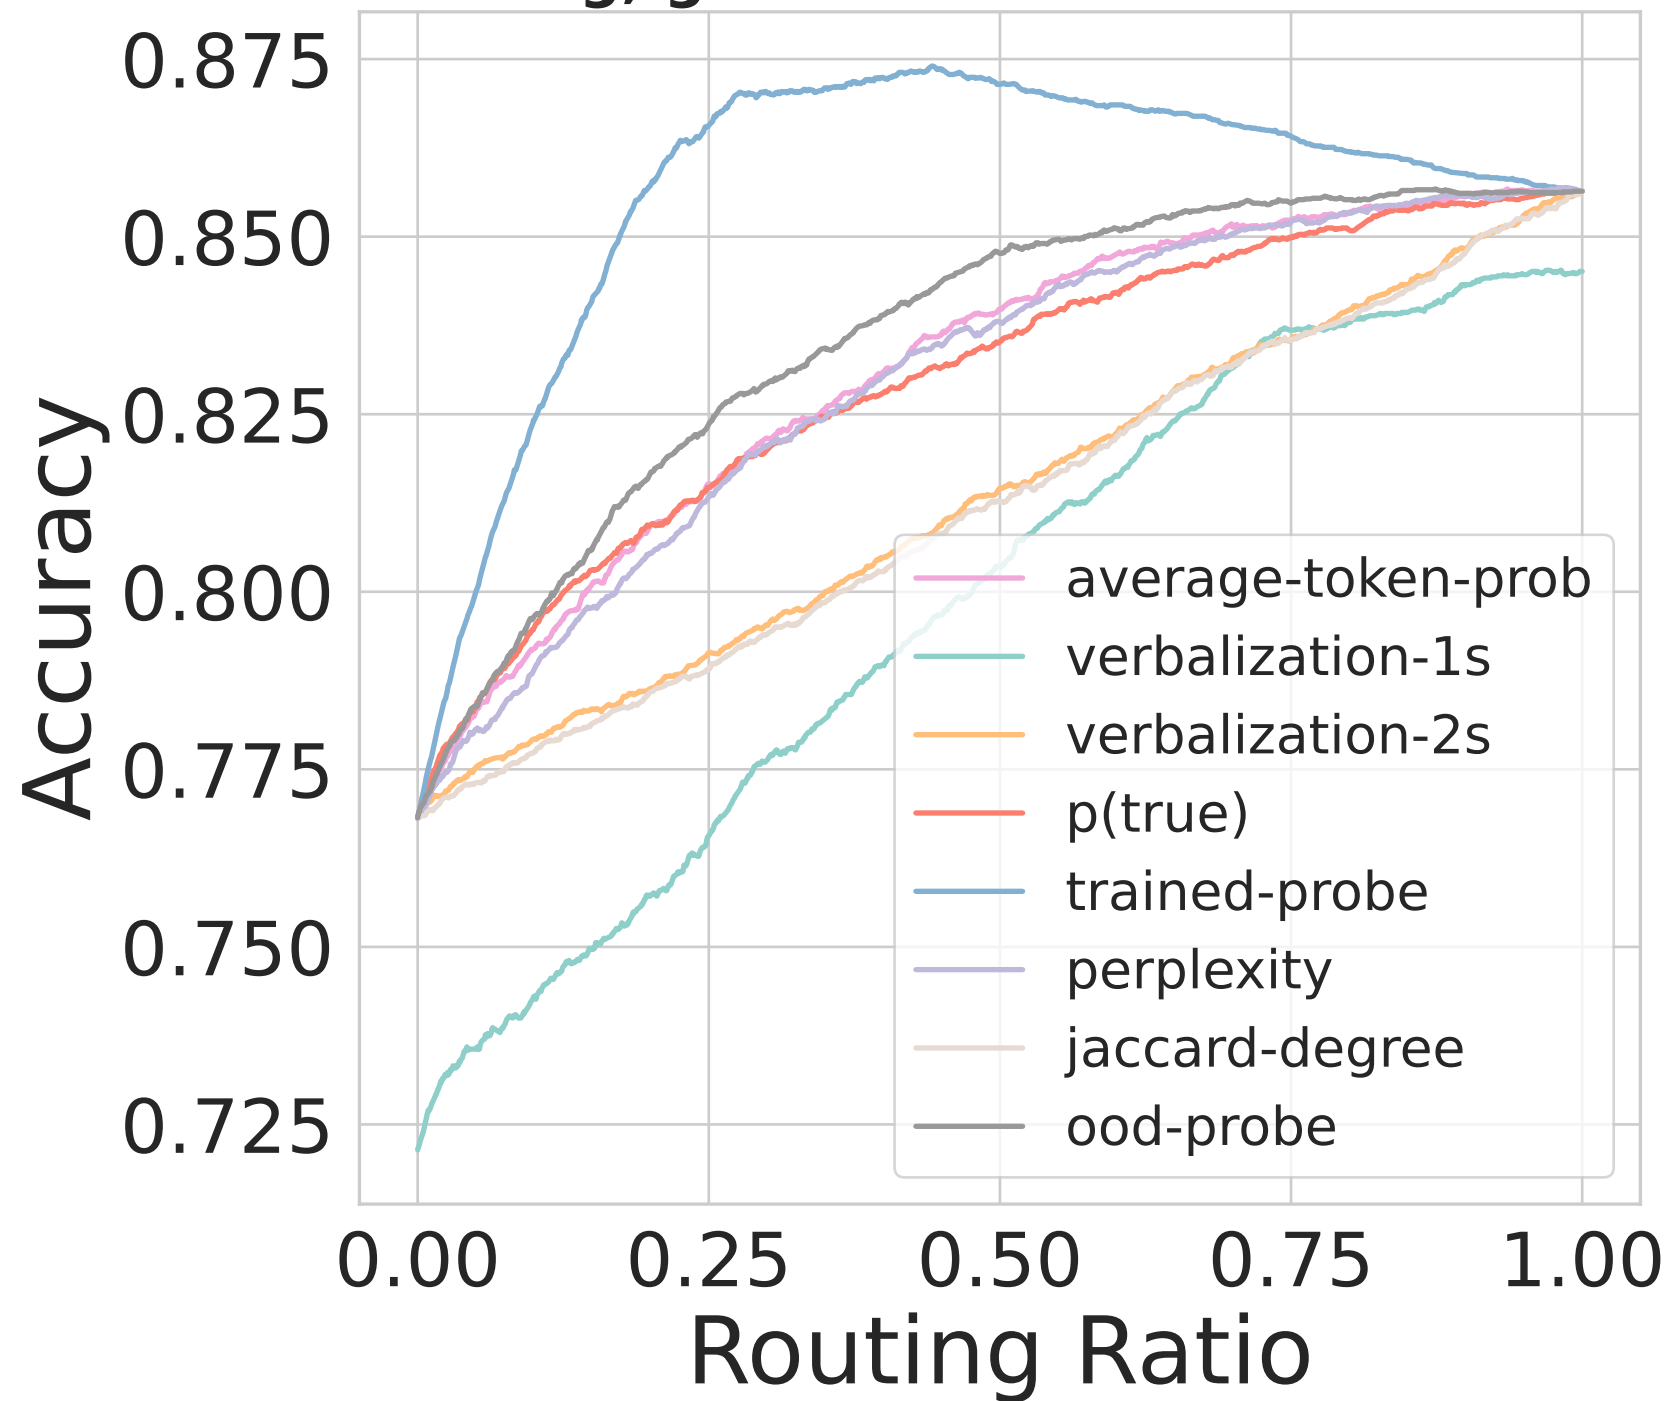

Supplement: supplementary_material [file rr_acc_hellaswag_granite-3.1-8b_llama70.pdf › Routing_SLM_LLMs/Uncertainty-based Routing/w_legend/to_llama70/rr_acc_hellaswag_granite-3.1-8b_llama70.pdf]

# HellaSwag, llama-3.1-8b to Llama-3.1-70B

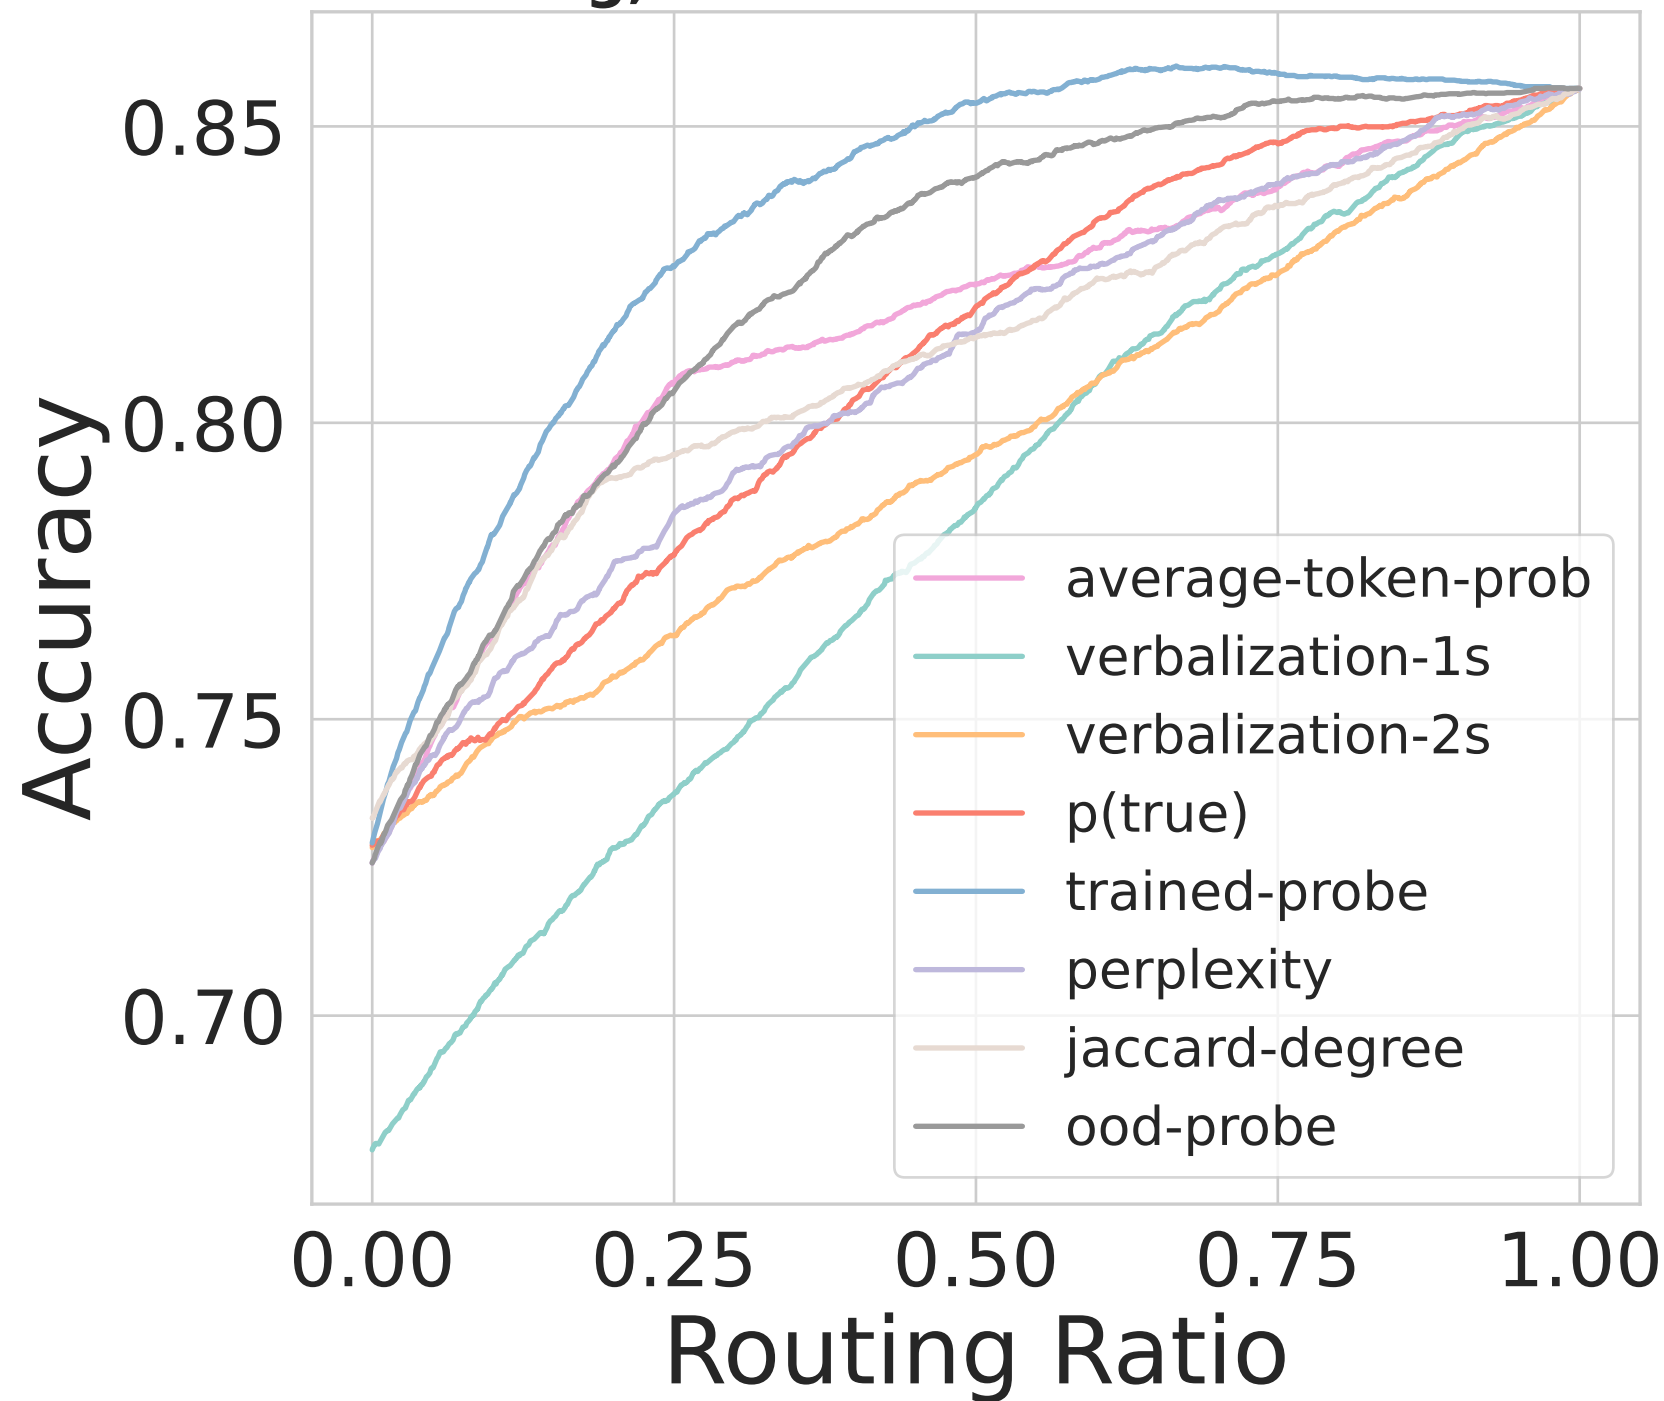

Supplement: supplementary_material [file rr_acc_hellaswag_llama-3.1-8b_llama70.pdf › Routing_SLM_LLMs/Uncertainty-based Routing/w_legend/to_llama70/rr_acc_hellaswag_llama-3.1-8b_llama70.pdf]

# HellaSwag, llama-3.2-1b to Llama-3.1-70B

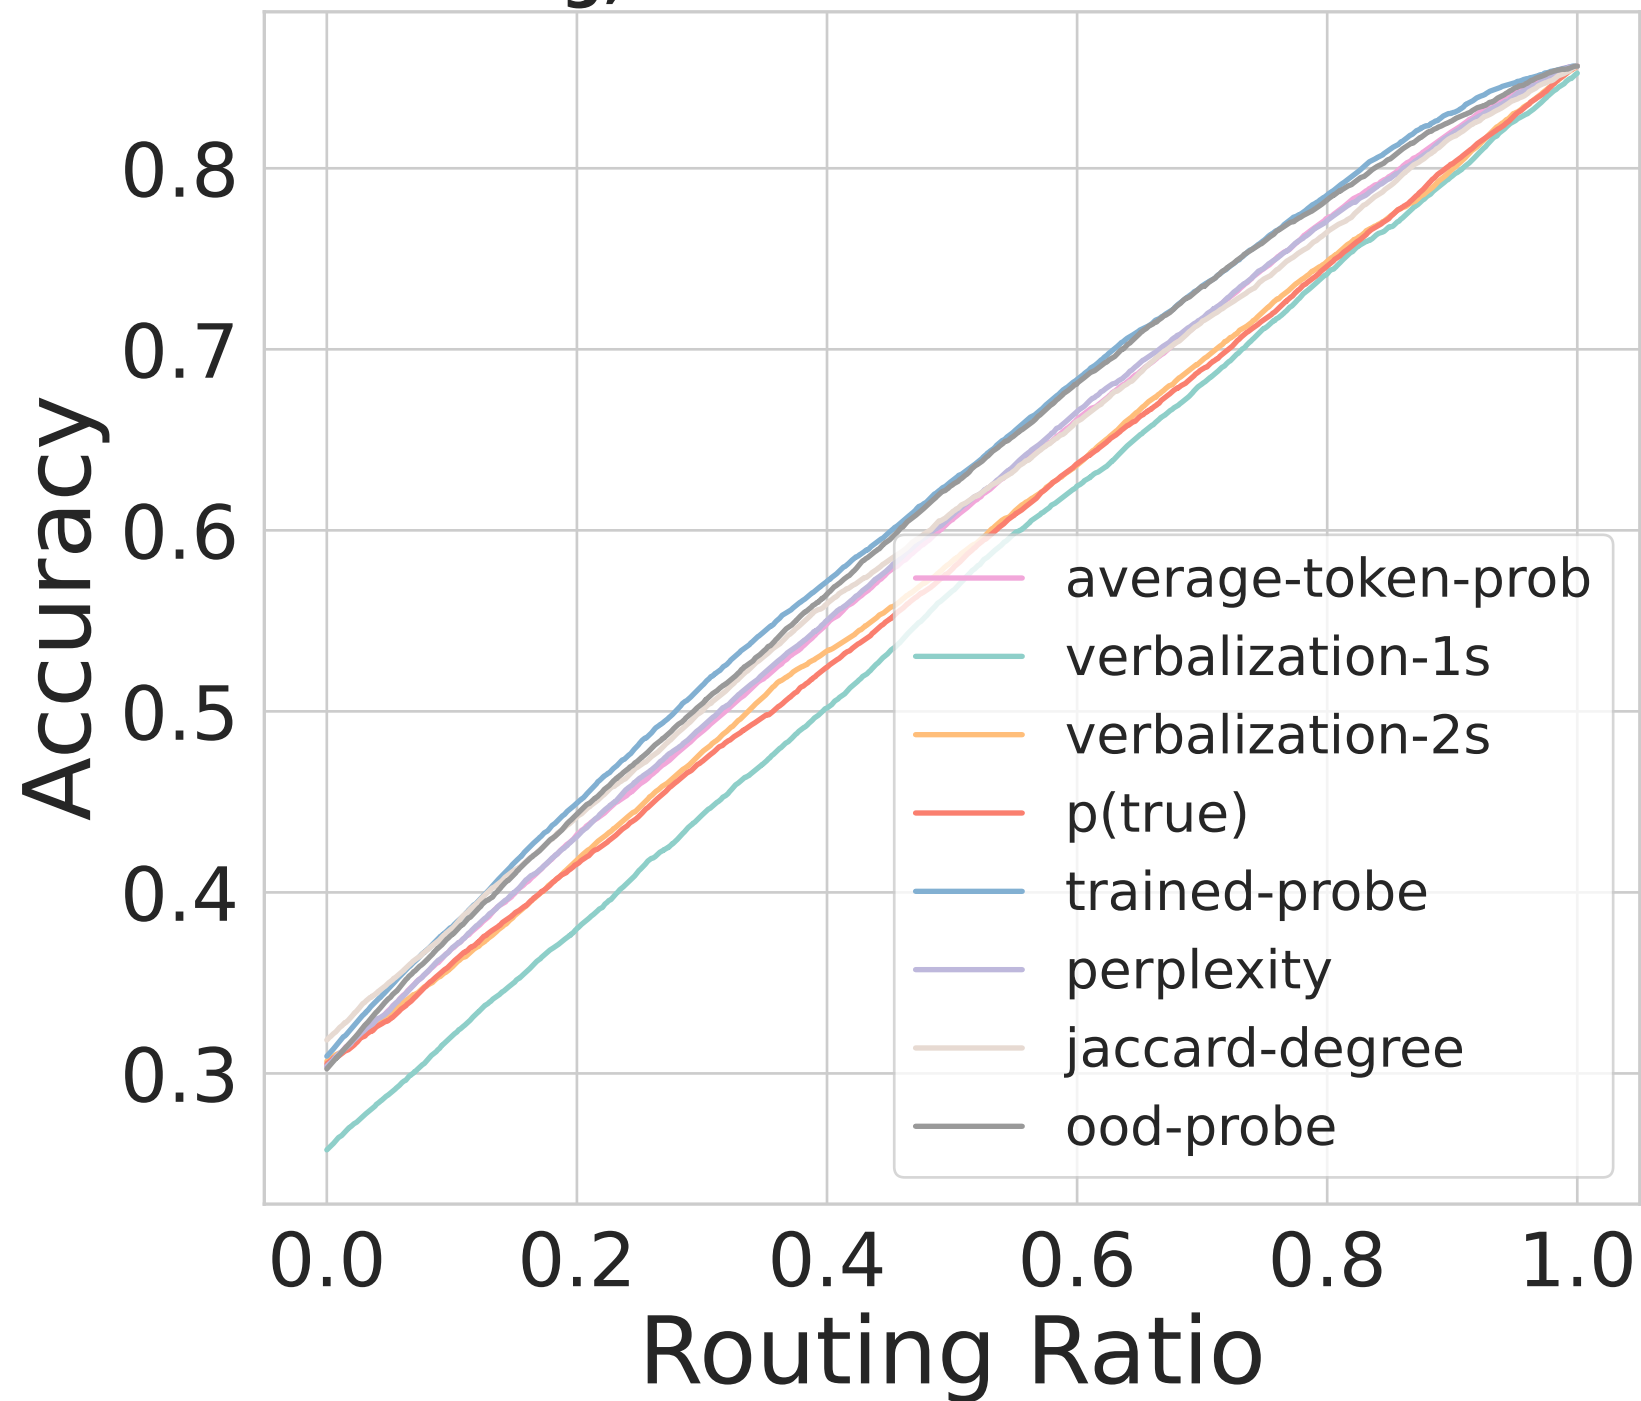

Supplement: supplementary_material [file rr_acc_hellaswag_llama-3.2-1b_llama70.pdf › Routing_SLM_LLMs/Uncertainty-based Routing/w_legend/to_llama70/rr_acc_hellaswag_llama-3.2-1b_llama70.pdf]

# HellaSwag, llama-3.2-3b to Llama-3.1-70B

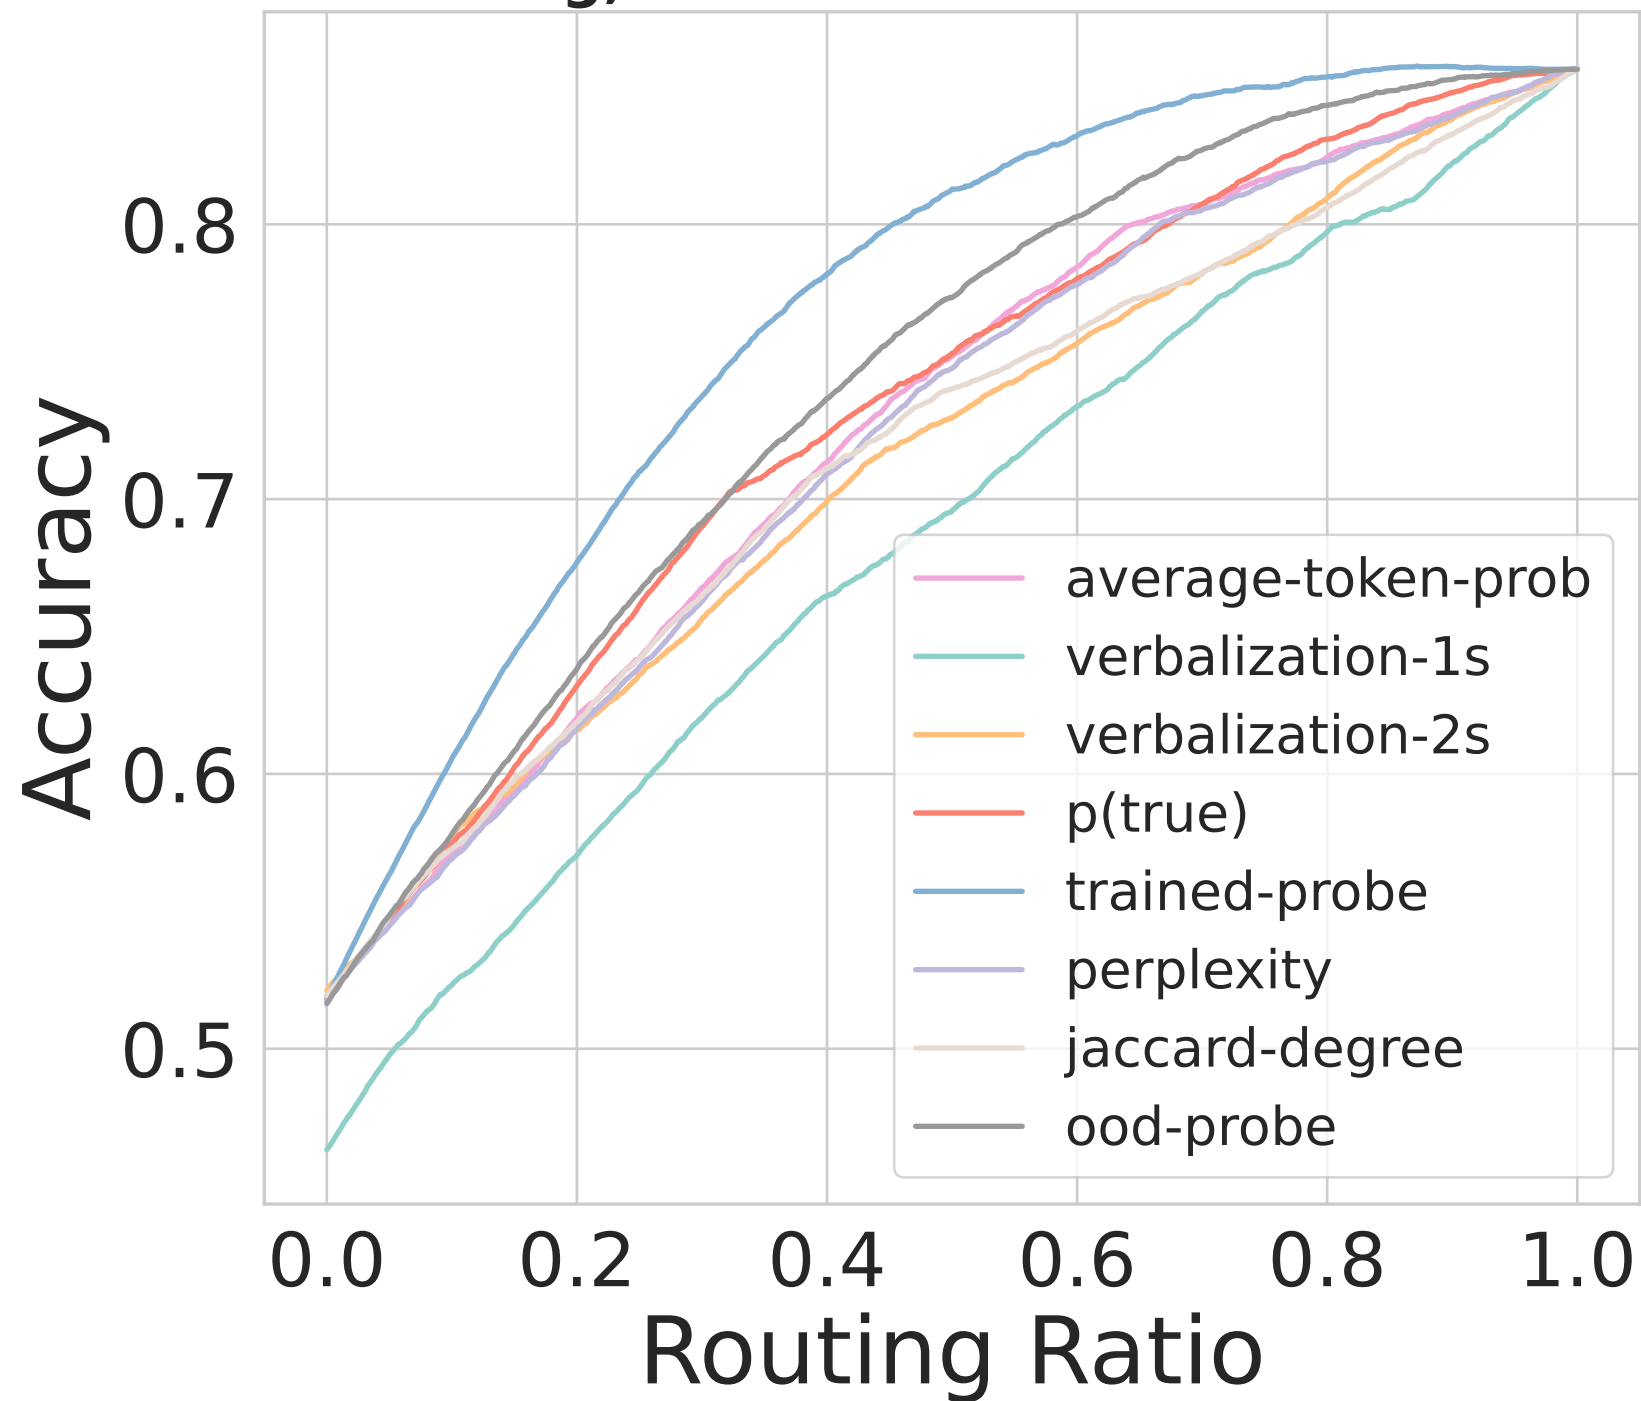

Supplement: supplementary_material [file rr_acc_hellaswag_llama-3.2-3b_llama70.pdf › Routing_SLM_LLMs/Uncertainty-based Routing/w_legend/to_llama70/rr_acc_hellaswag_llama-3.2-3b_llama70.pdf]

HellaSwag, mistral-7b to Llama-3.1-70B

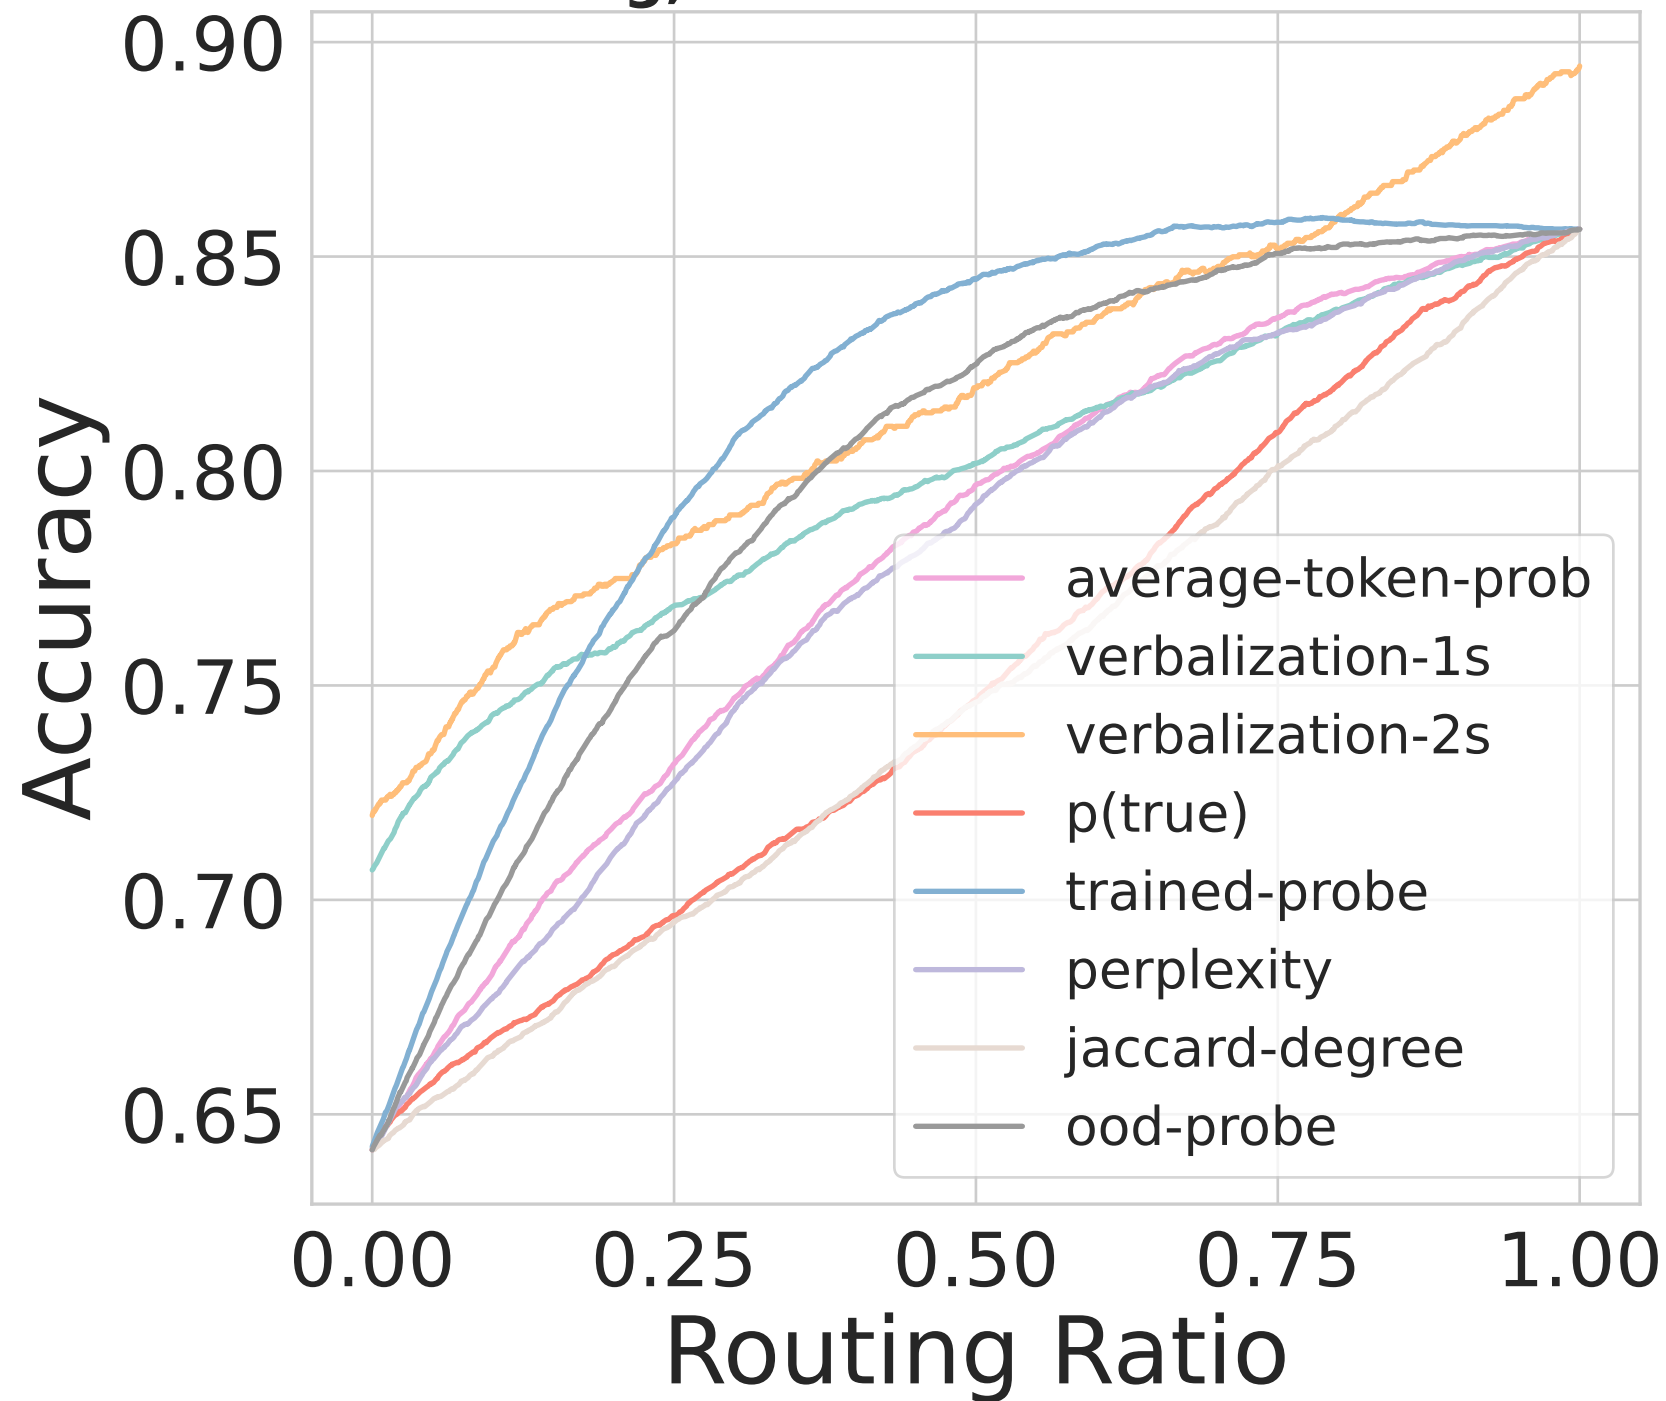

Supplement: supplementary_material [file rr_acc_hellaswag_mistral-7b_llama70.pdf › Routing_SLM_LLMs/Uncertainty-based Routing/w_legend/to_llama70/rr_acc_hellaswag_mistral-7b_llama70.pdf]

# HellaSwag, phi-4-mini-reasoning to Llama-3.1-70B

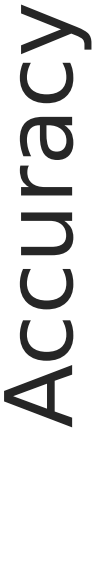

Supplement: supplementary_material [file rr_acc_hellaswag_phi-4-mini-reasoning_llama70.pdf › Routing_SLM_LLMs/Uncertainty-based Routing/w_legend/to_llama70/rr_acc_hellaswag_phi-4-mini-reasoning_llama70.pdf]

# HellaSwag, qwen-2.5-7b to Llama-3.1-70B

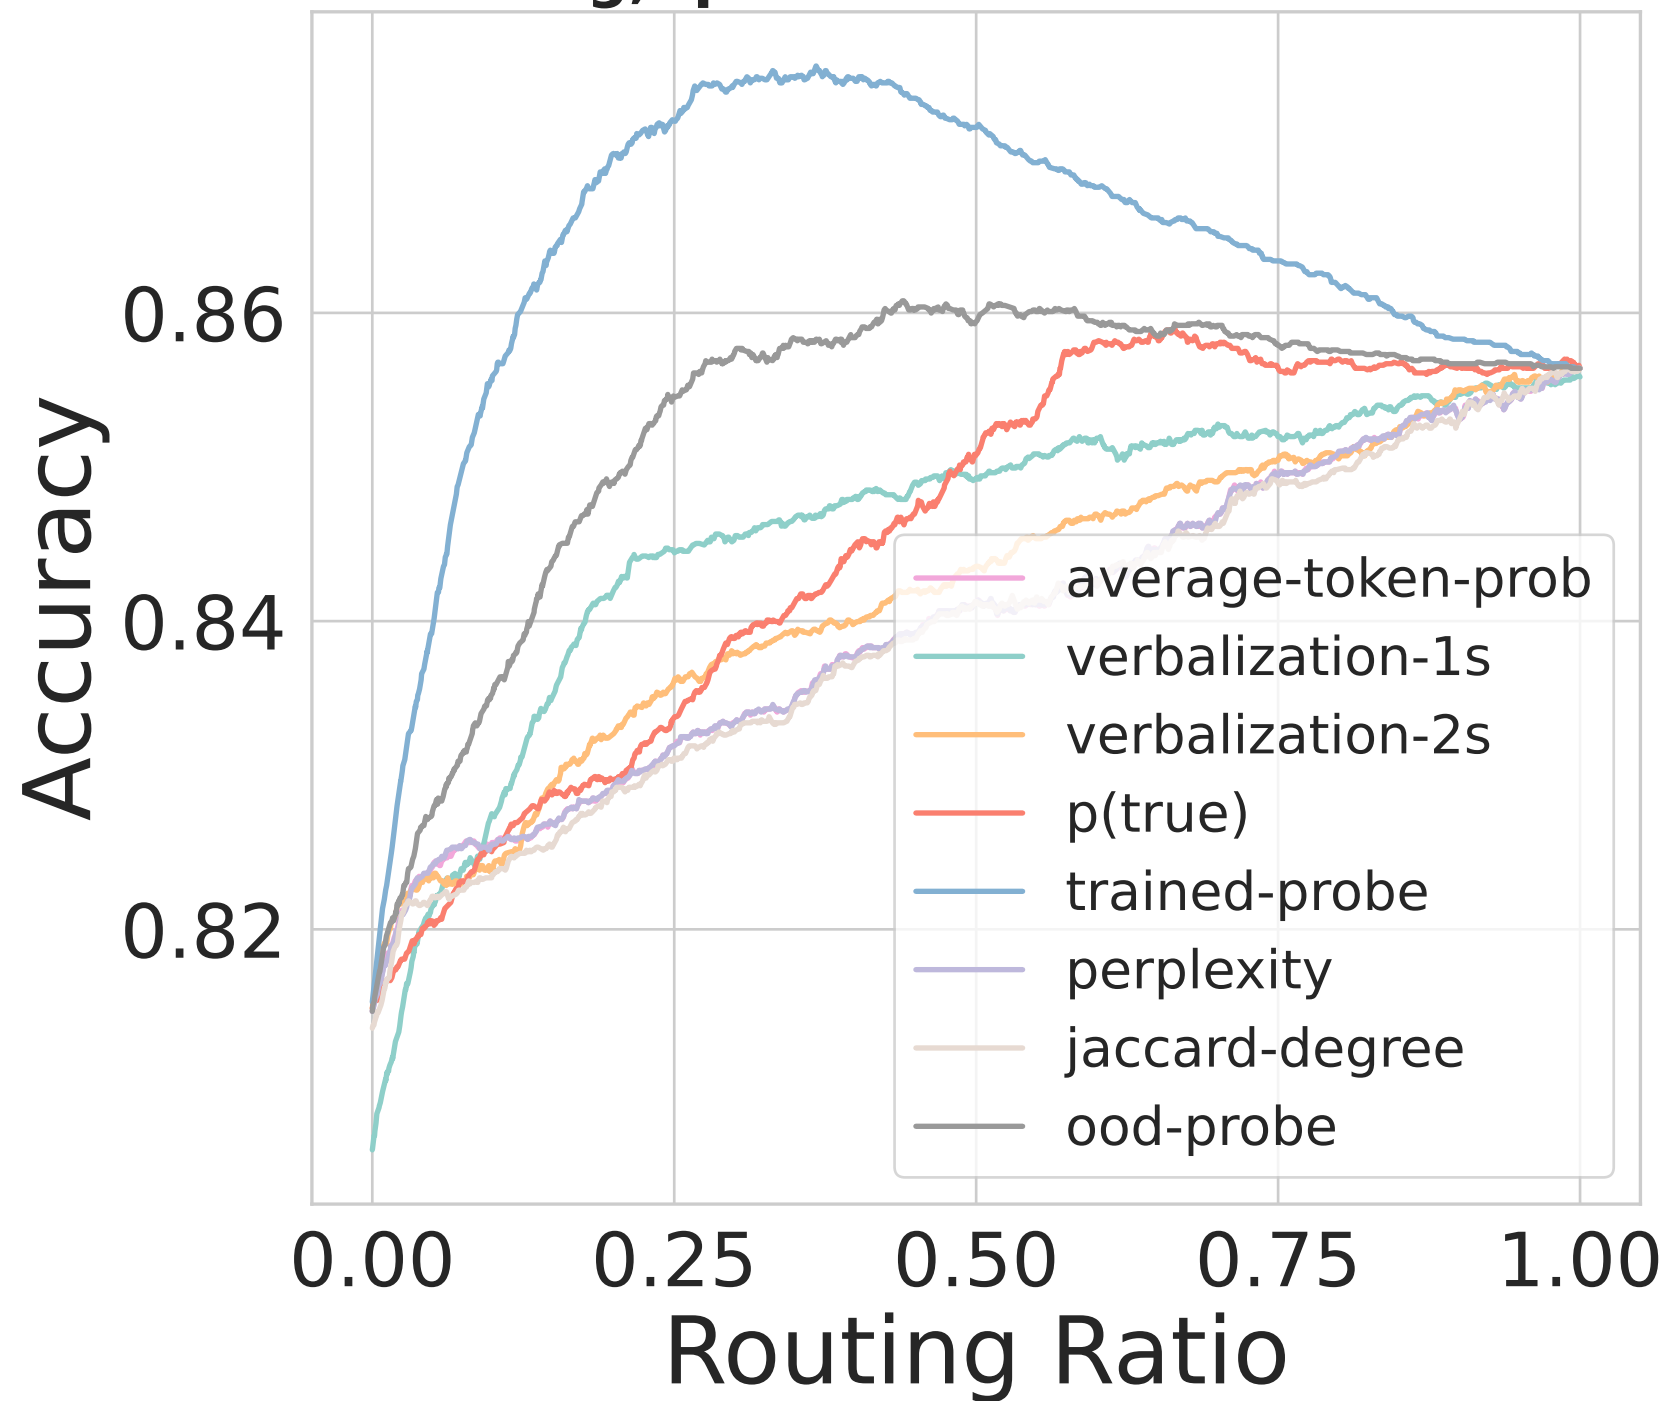

Supplement: supplementary_material [file rr_acc_hellaswag_qwen-2.5-7b_llama70.pdf › Routing_SLM_LLMs/Uncertainty-based Routing/w_legend/to_llama70/rr_acc_hellaswag_qwen-2.5-7b_llama70.pdf]

**HellaSwag, rwkv to Llama-3.1-70B**

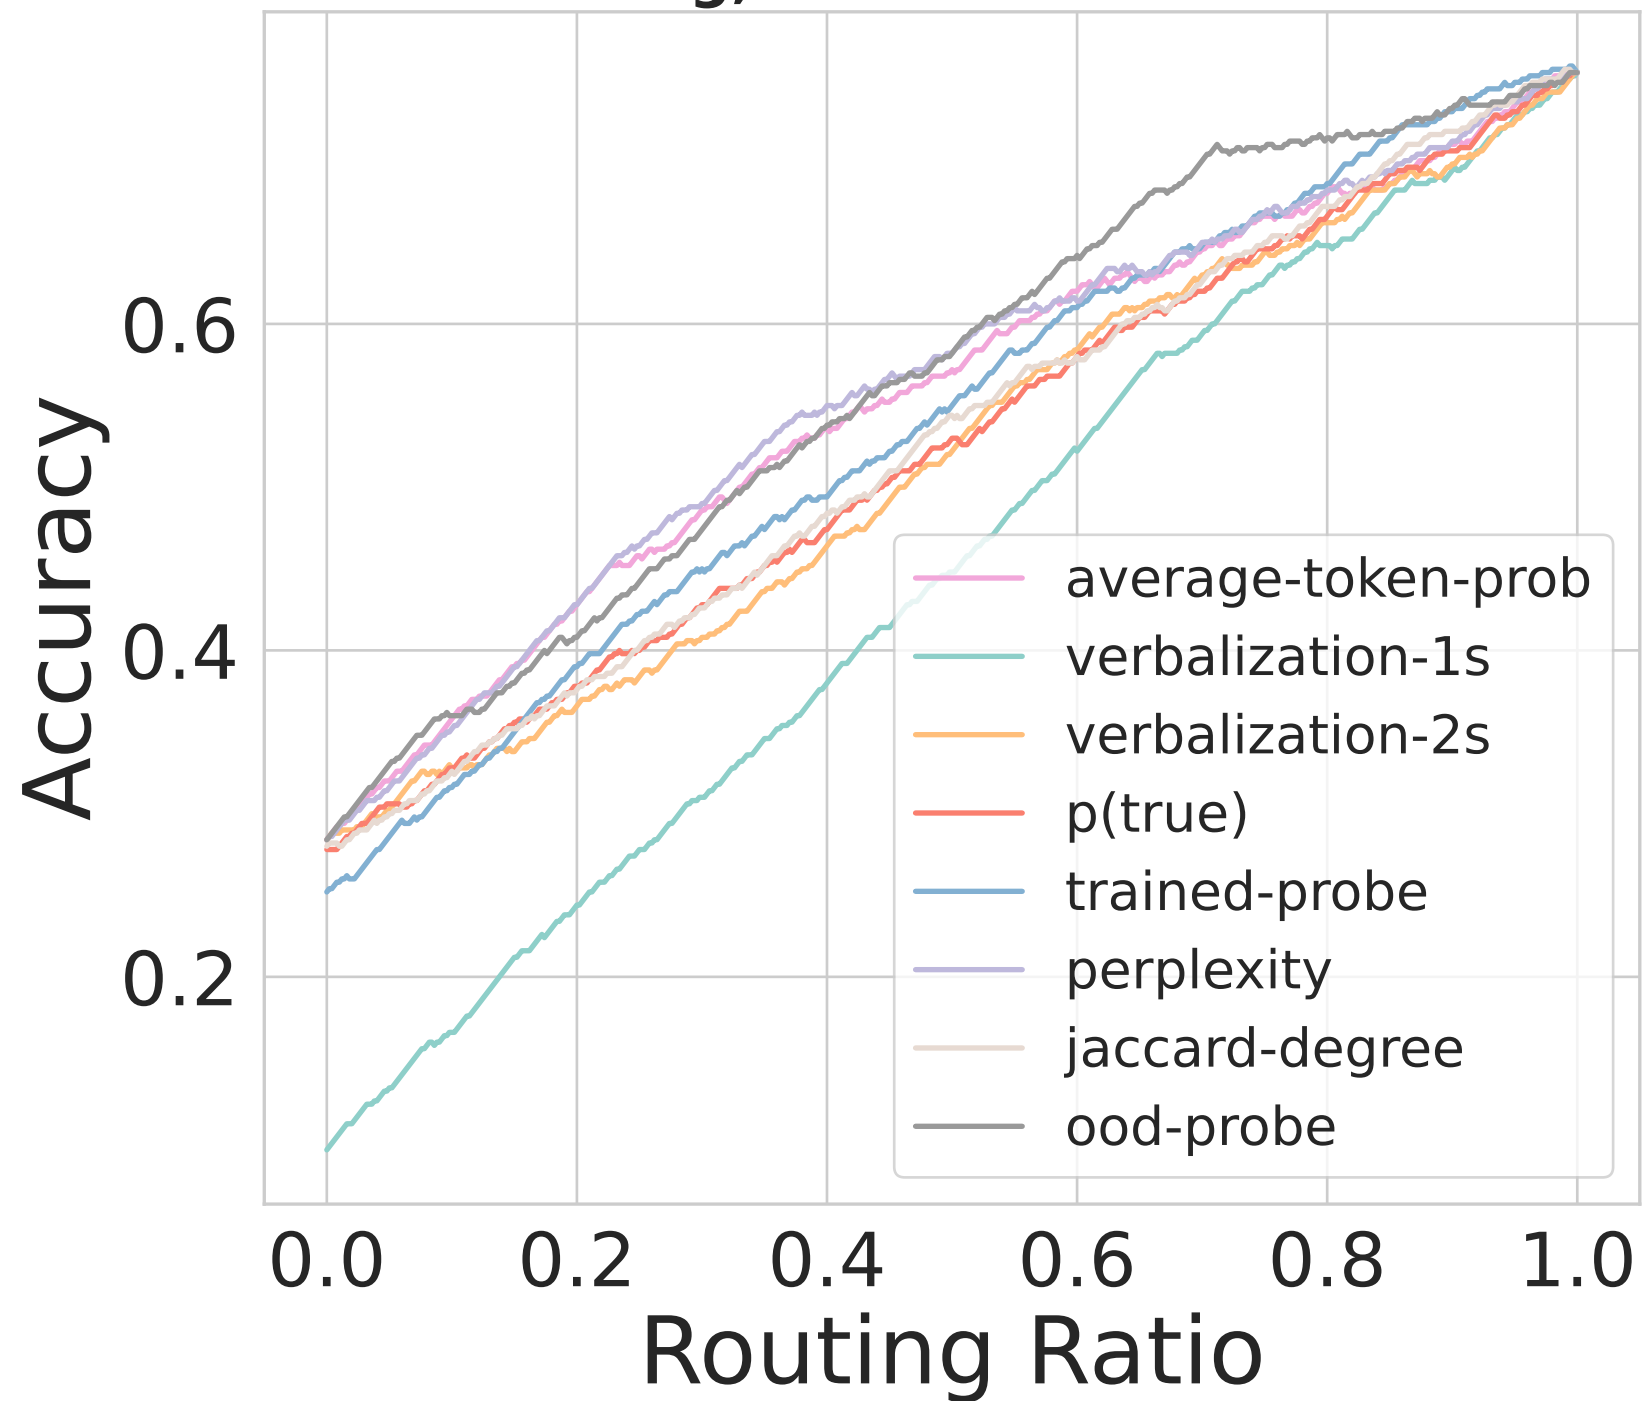

Supplement: supplementary_material [file rr_acc_hellaswag_rwkv_llama70.pdf › Routing_SLM_LLMs/Uncertainty-based Routing/w_legend/to_llama70/rr_acc_hellaswag_rwkv_llama70.pdf]

# MATH-500, Qwen3-0.6B to Llama-3.1-70B

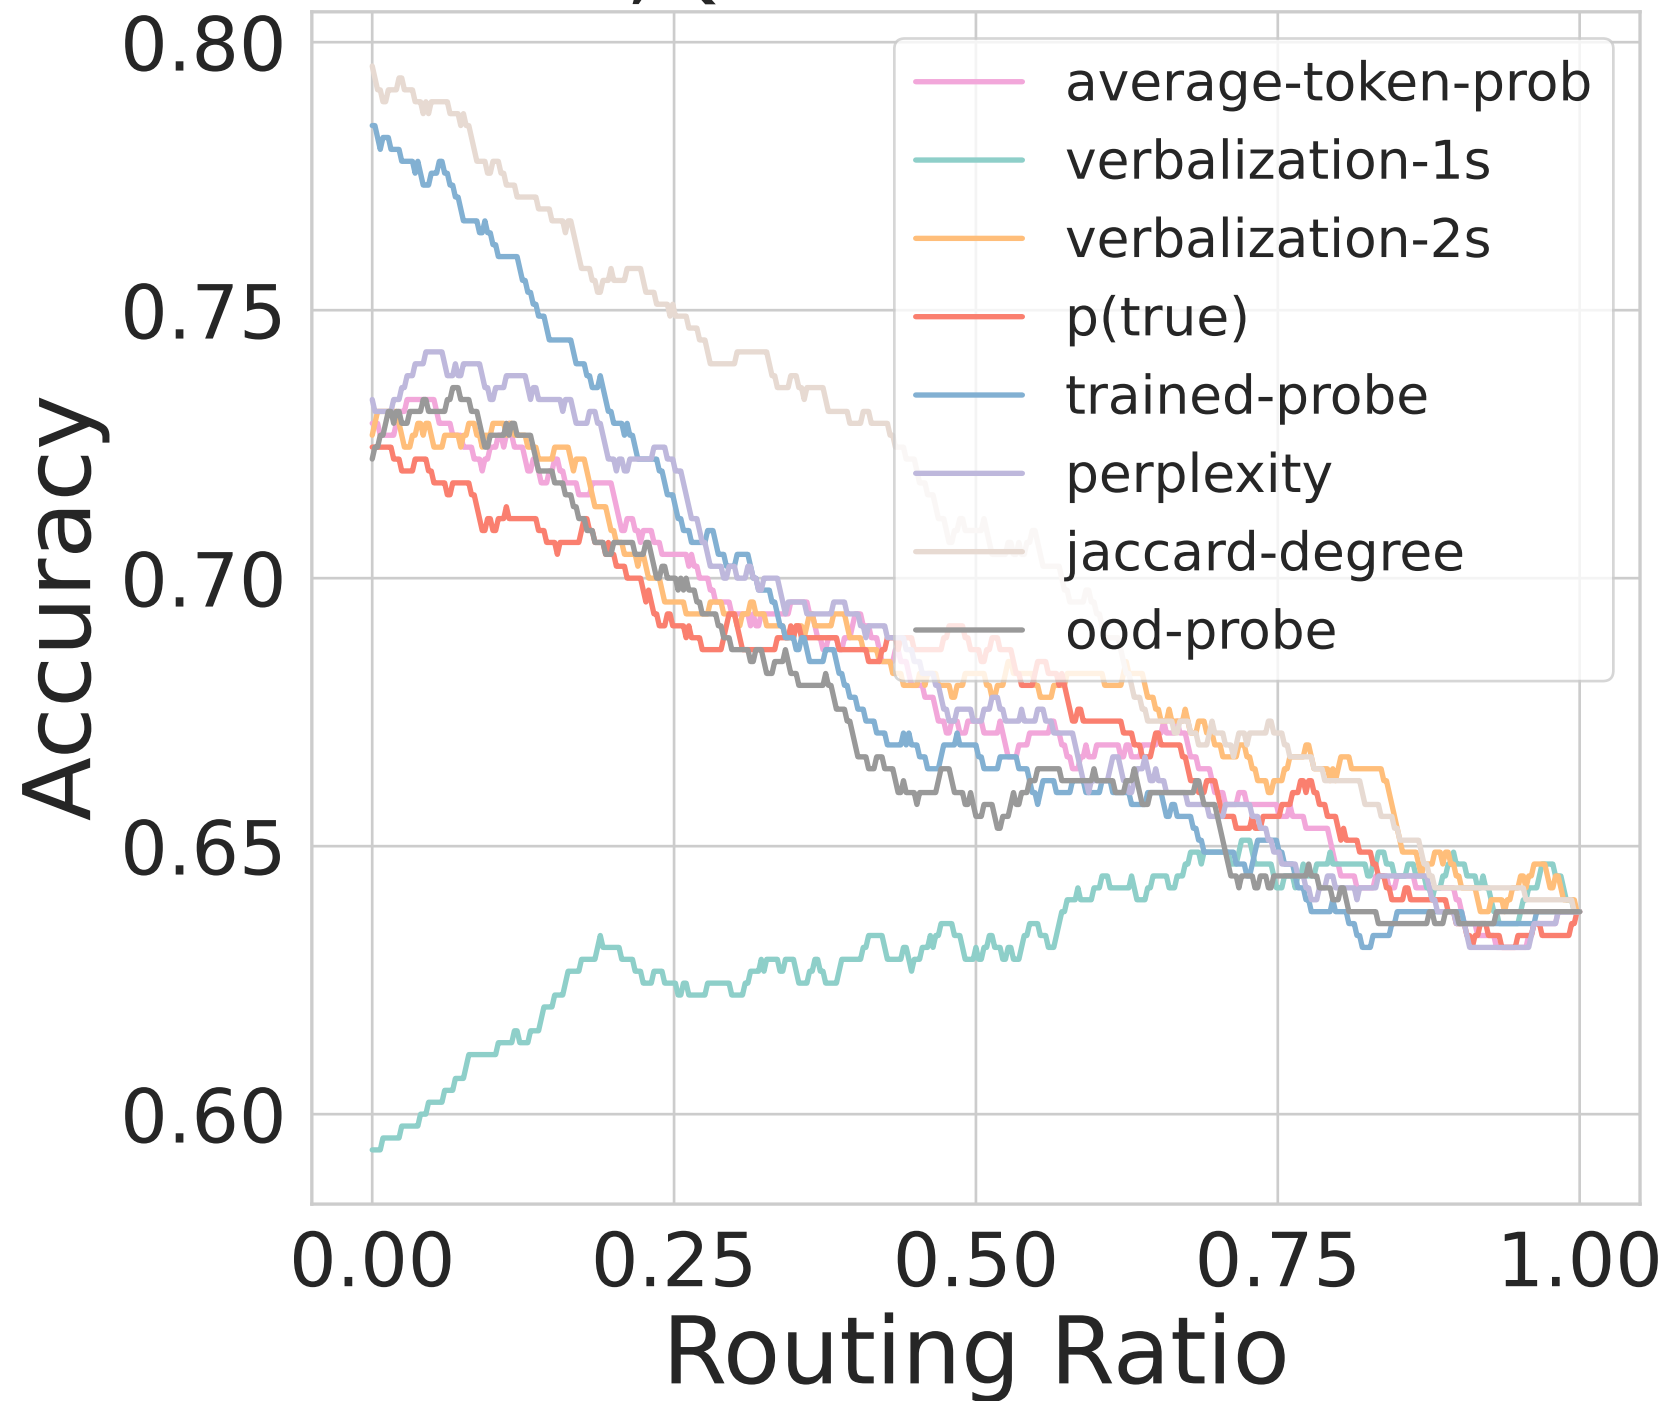

Supplement: supplementary_material [file rr_acc_math_500_Qwen3-0.6B_llama70.pdf › Routing_SLM_LLMs/Uncertainty-based Routing/w_legend/to_llama70/rr_acc_math_500_Qwen3-0.6B_llama70.pdf]

# MATH-500, Qwen3-1.7B to Llama-3.1-70B

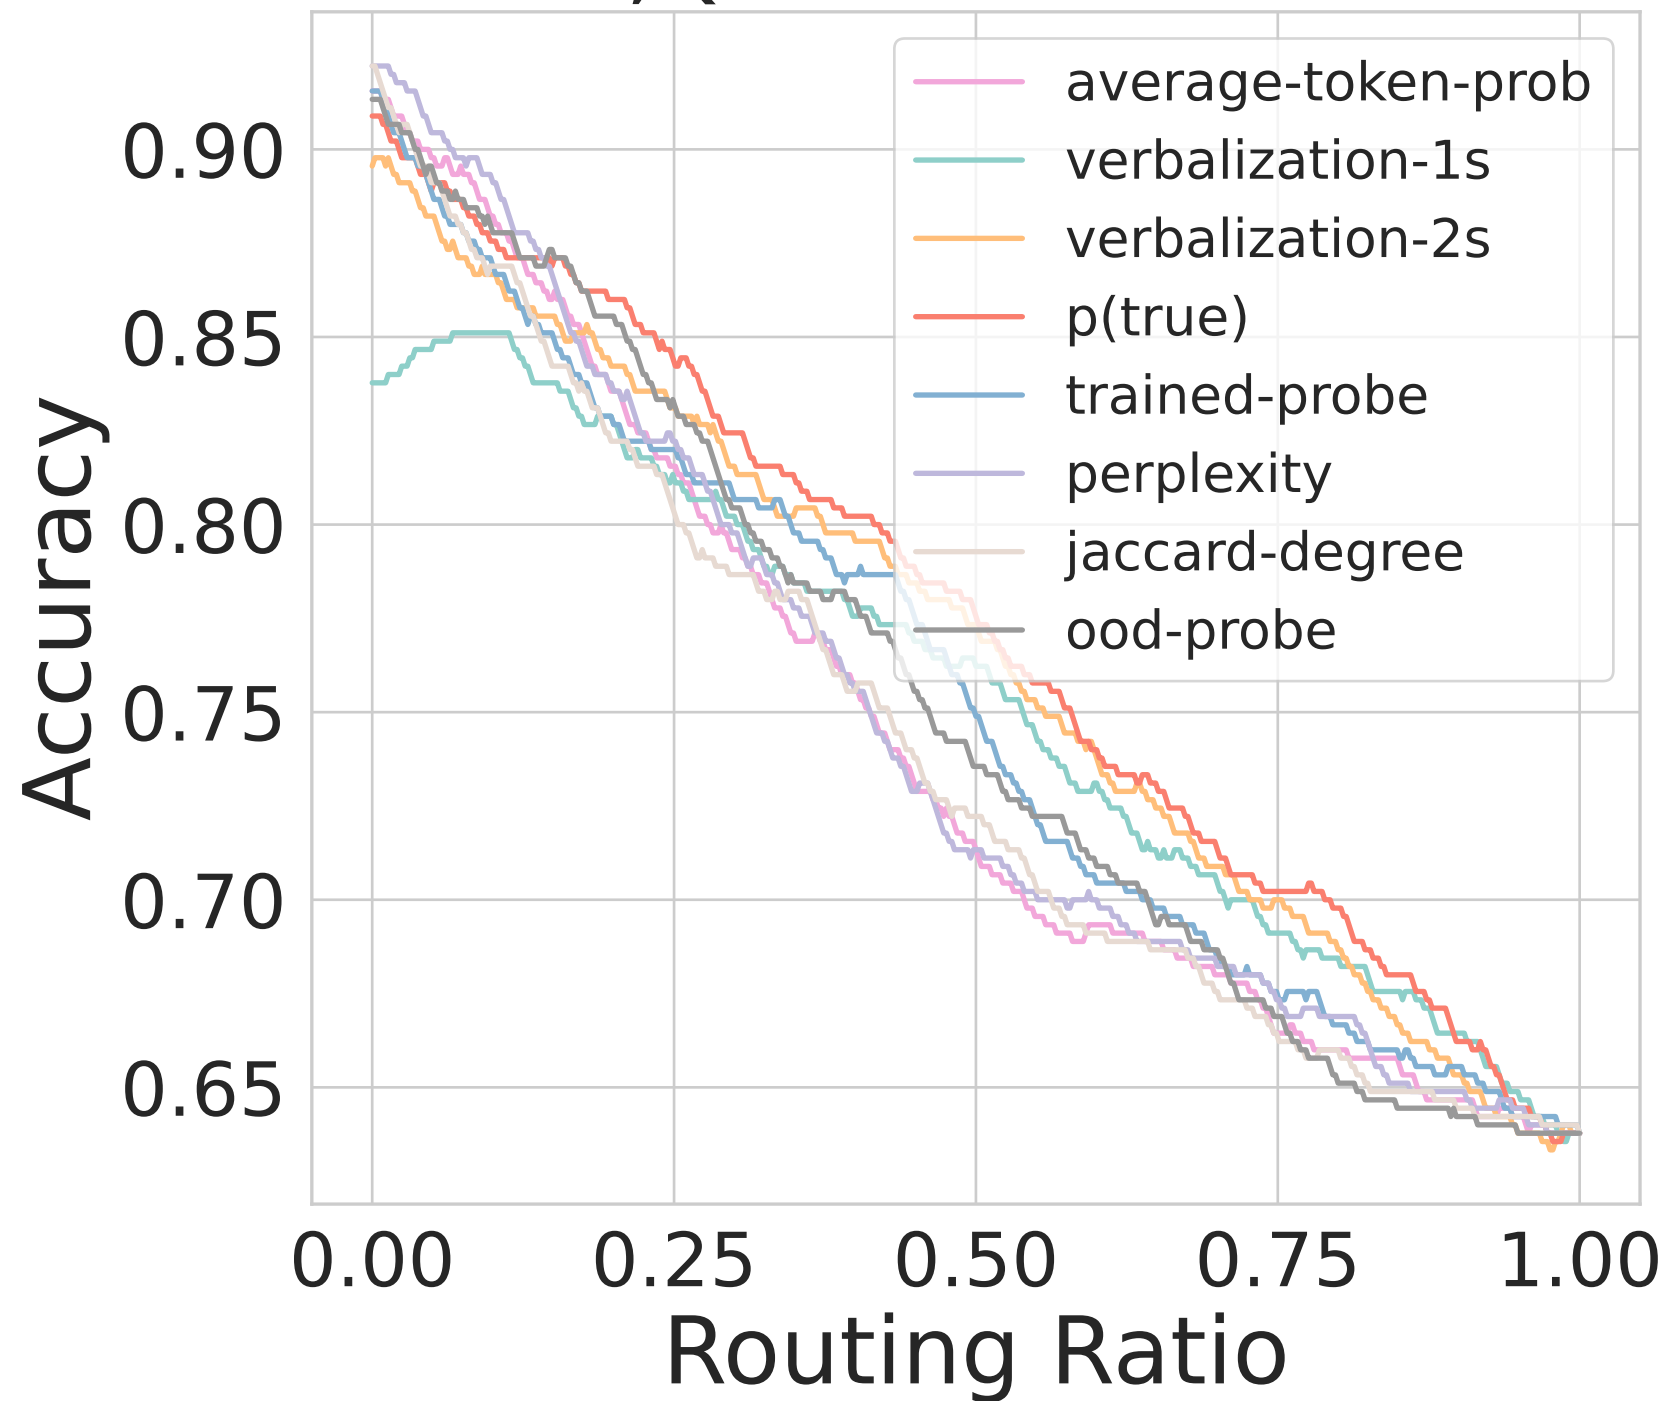

Supplement: supplementary_material [file rr_acc_math_500_Qwen3-1.7B_llama70.pdf › Routing_SLM_LLMs/Uncertainty-based Routing/w_legend/to_llama70/rr_acc_math_500_Qwen3-1.7B_llama70.pdf]

**MATH-500, Qwen3-4B to Llama-3.1-70B**

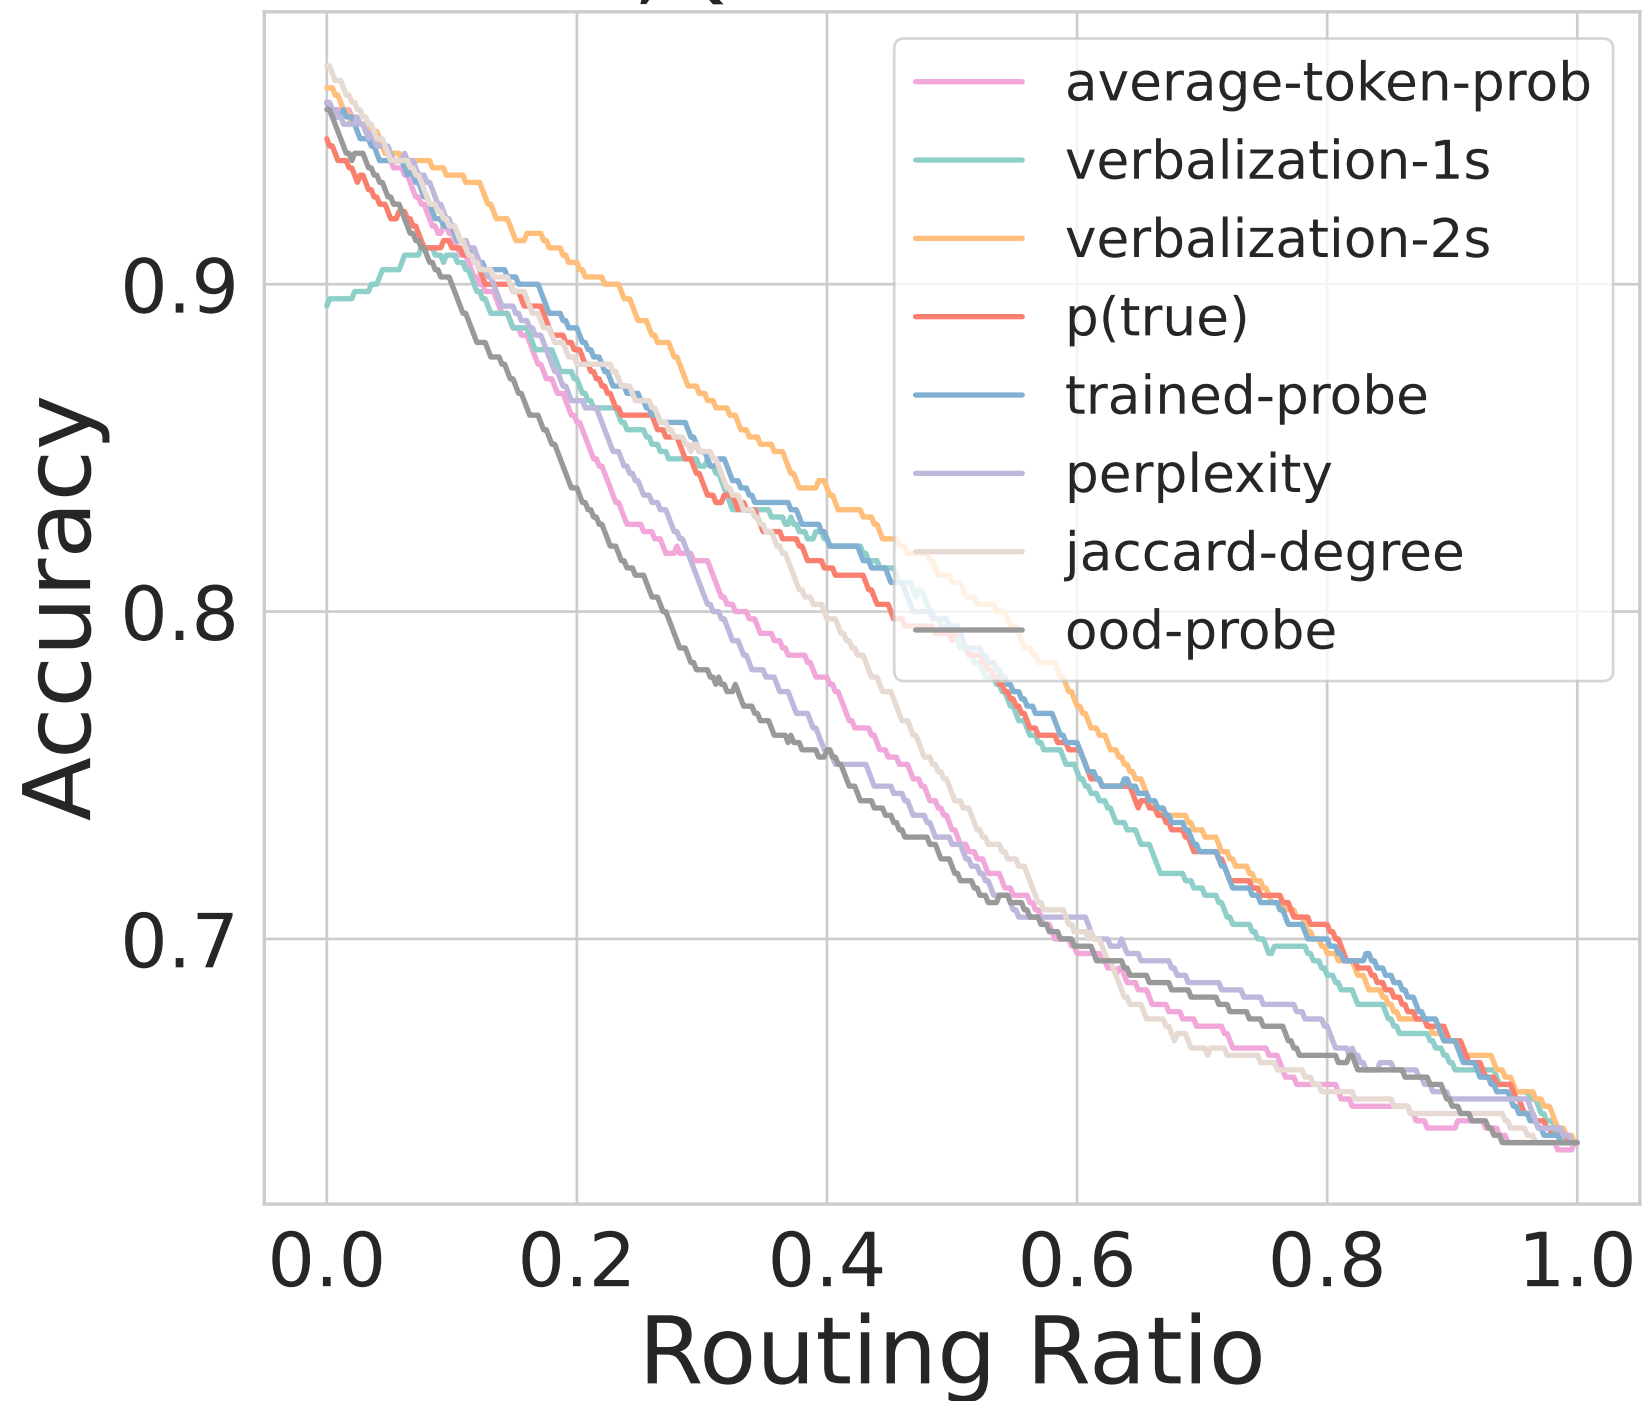

Supplement: supplementary_material [file rr_acc_math_500_Qwen3-4B_llama70.pdf › Routing_SLM_LLMs/Uncertainty-based Routing/w_legend/to_llama70/rr_acc_math_500_Qwen3-4B_llama70.pdf]

# MATH-500, granite-3.1-8b to Llama-3.1-70B

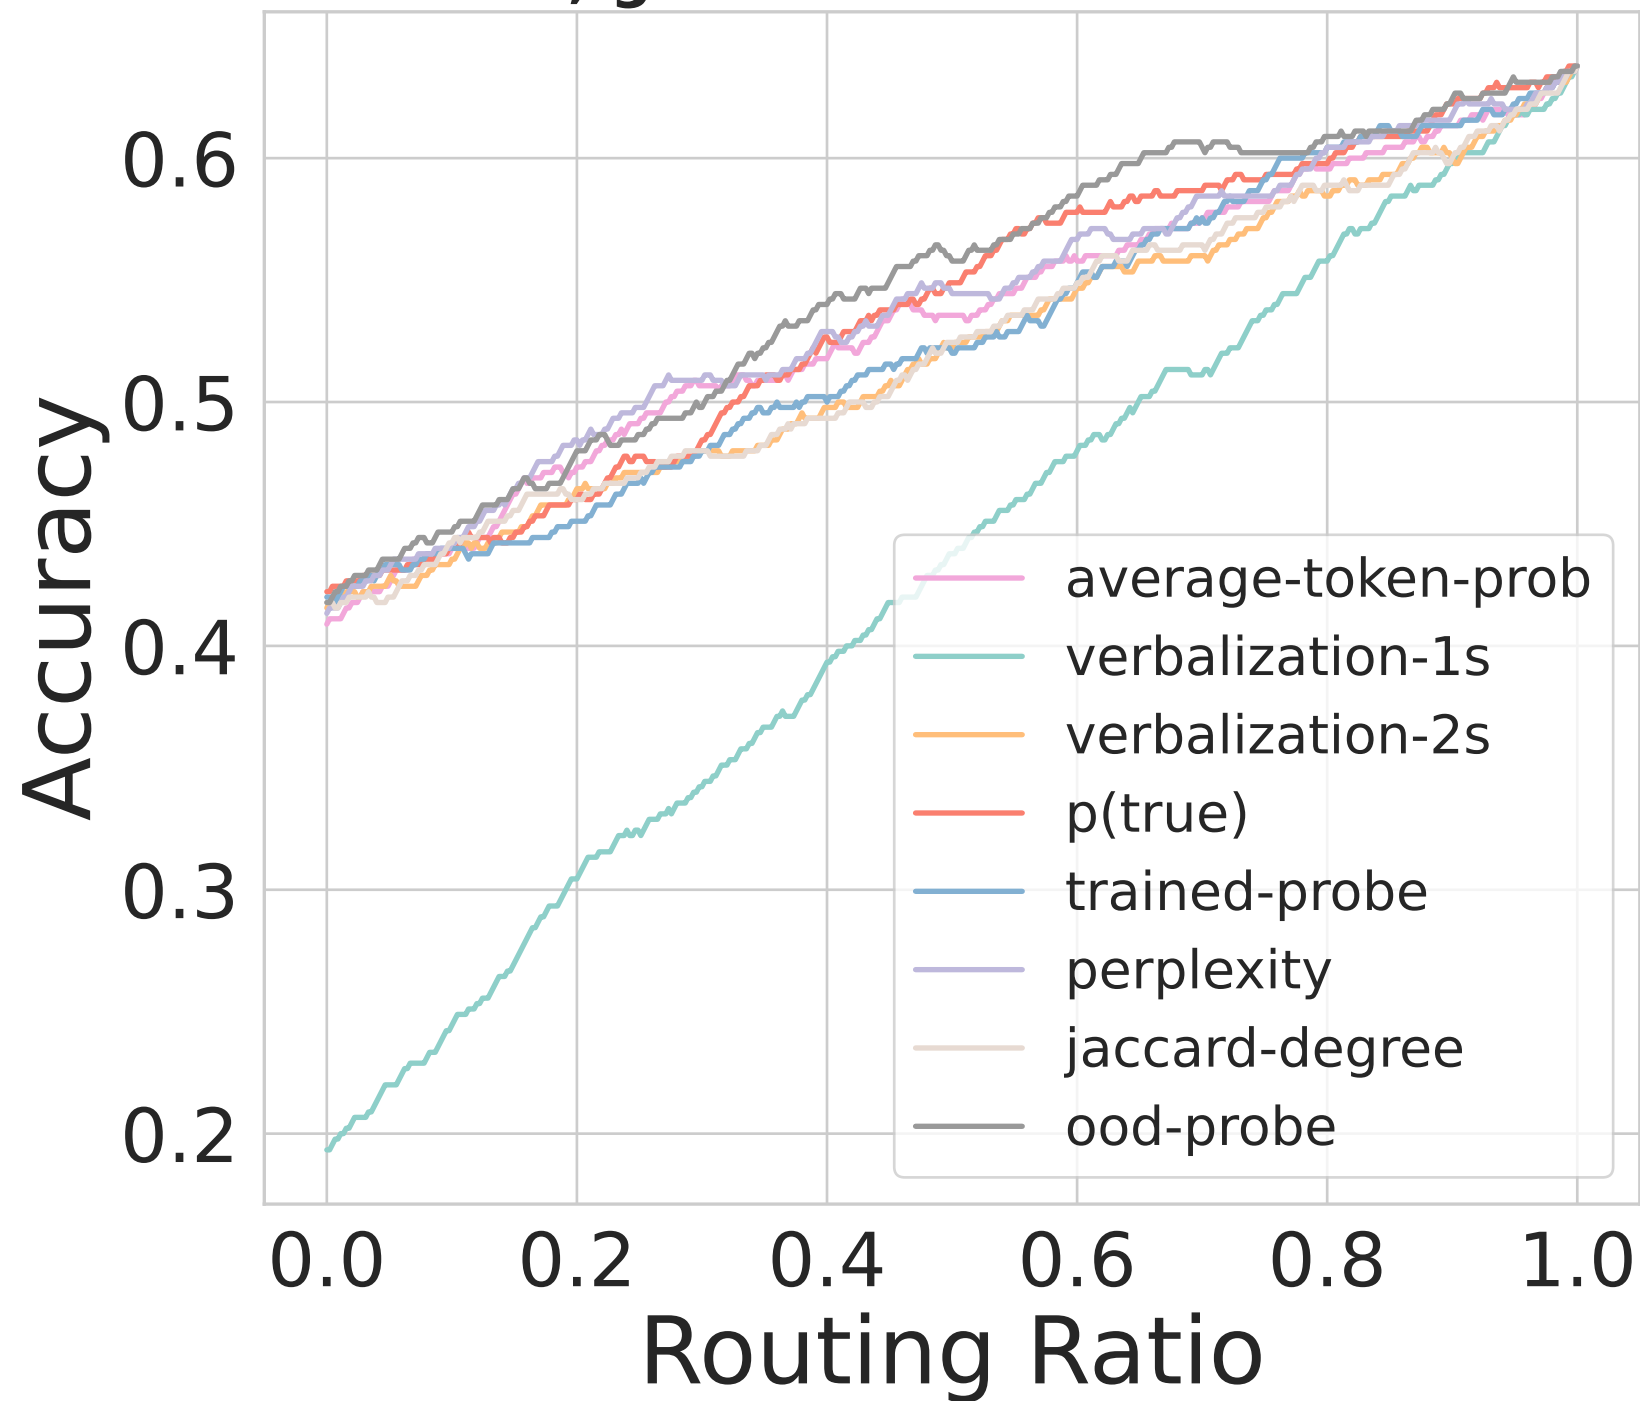

Supplement: supplementary_material [file rr_acc_math_500_granite-3.1-8b_llama70.pdf › Routing_SLM_LLMs/Uncertainty-based Routing/w_legend/to_llama70/rr_acc_math_500_granite-3.1-8b_llama70.pdf]

# MATH-500, llama-3.1-8b to Llama-3.1-70B

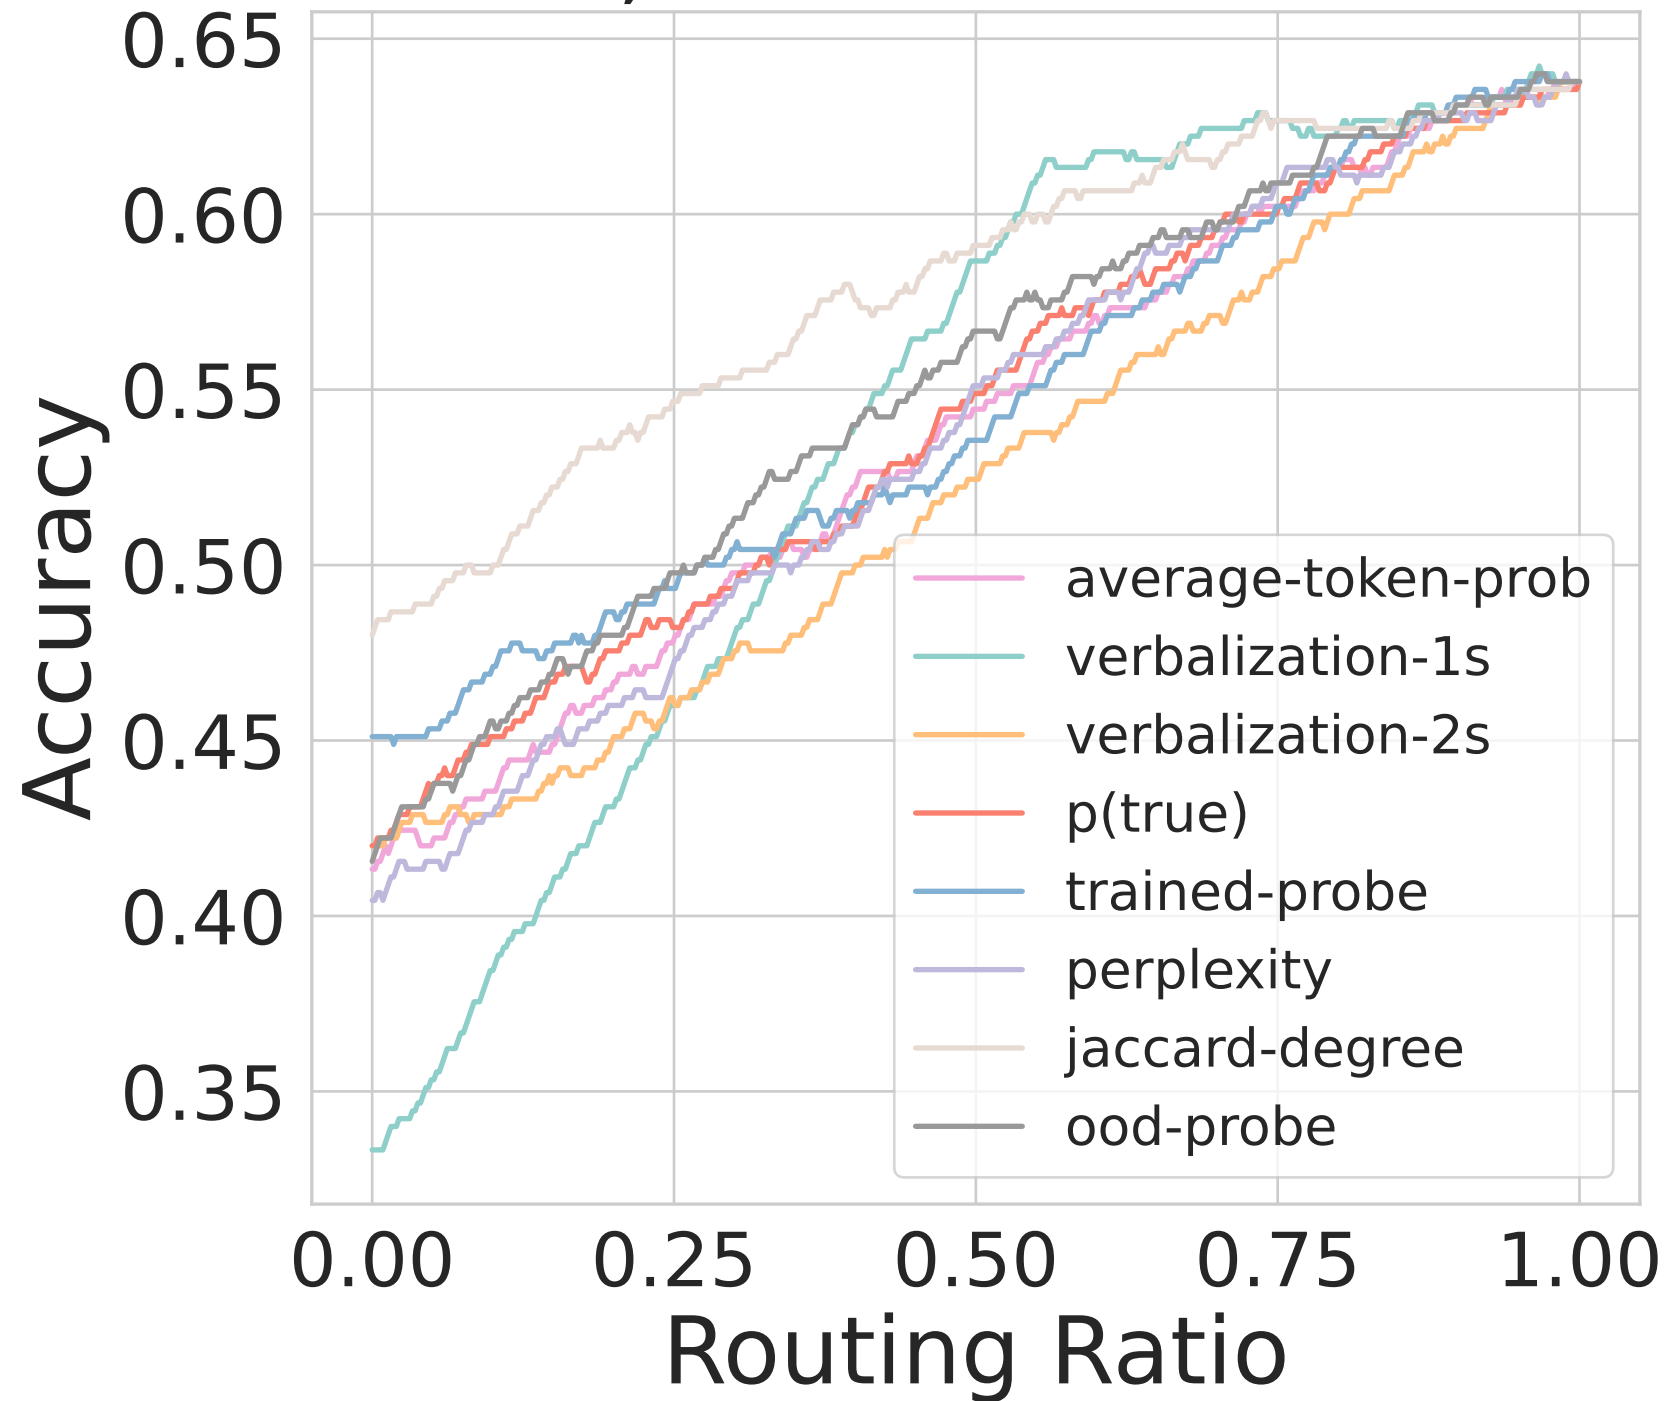

Supplement: supplementary_material [file rr_acc_math_500_llama-3.1-8b_llama70.pdf › Routing_SLM_LLMs/Uncertainty-based Routing/w_legend/to_llama70/rr_acc_math_500_llama-3.1-8b_llama70.pdf]

# MATH-500, llama-3.2-1b to Llama-3.1-70B

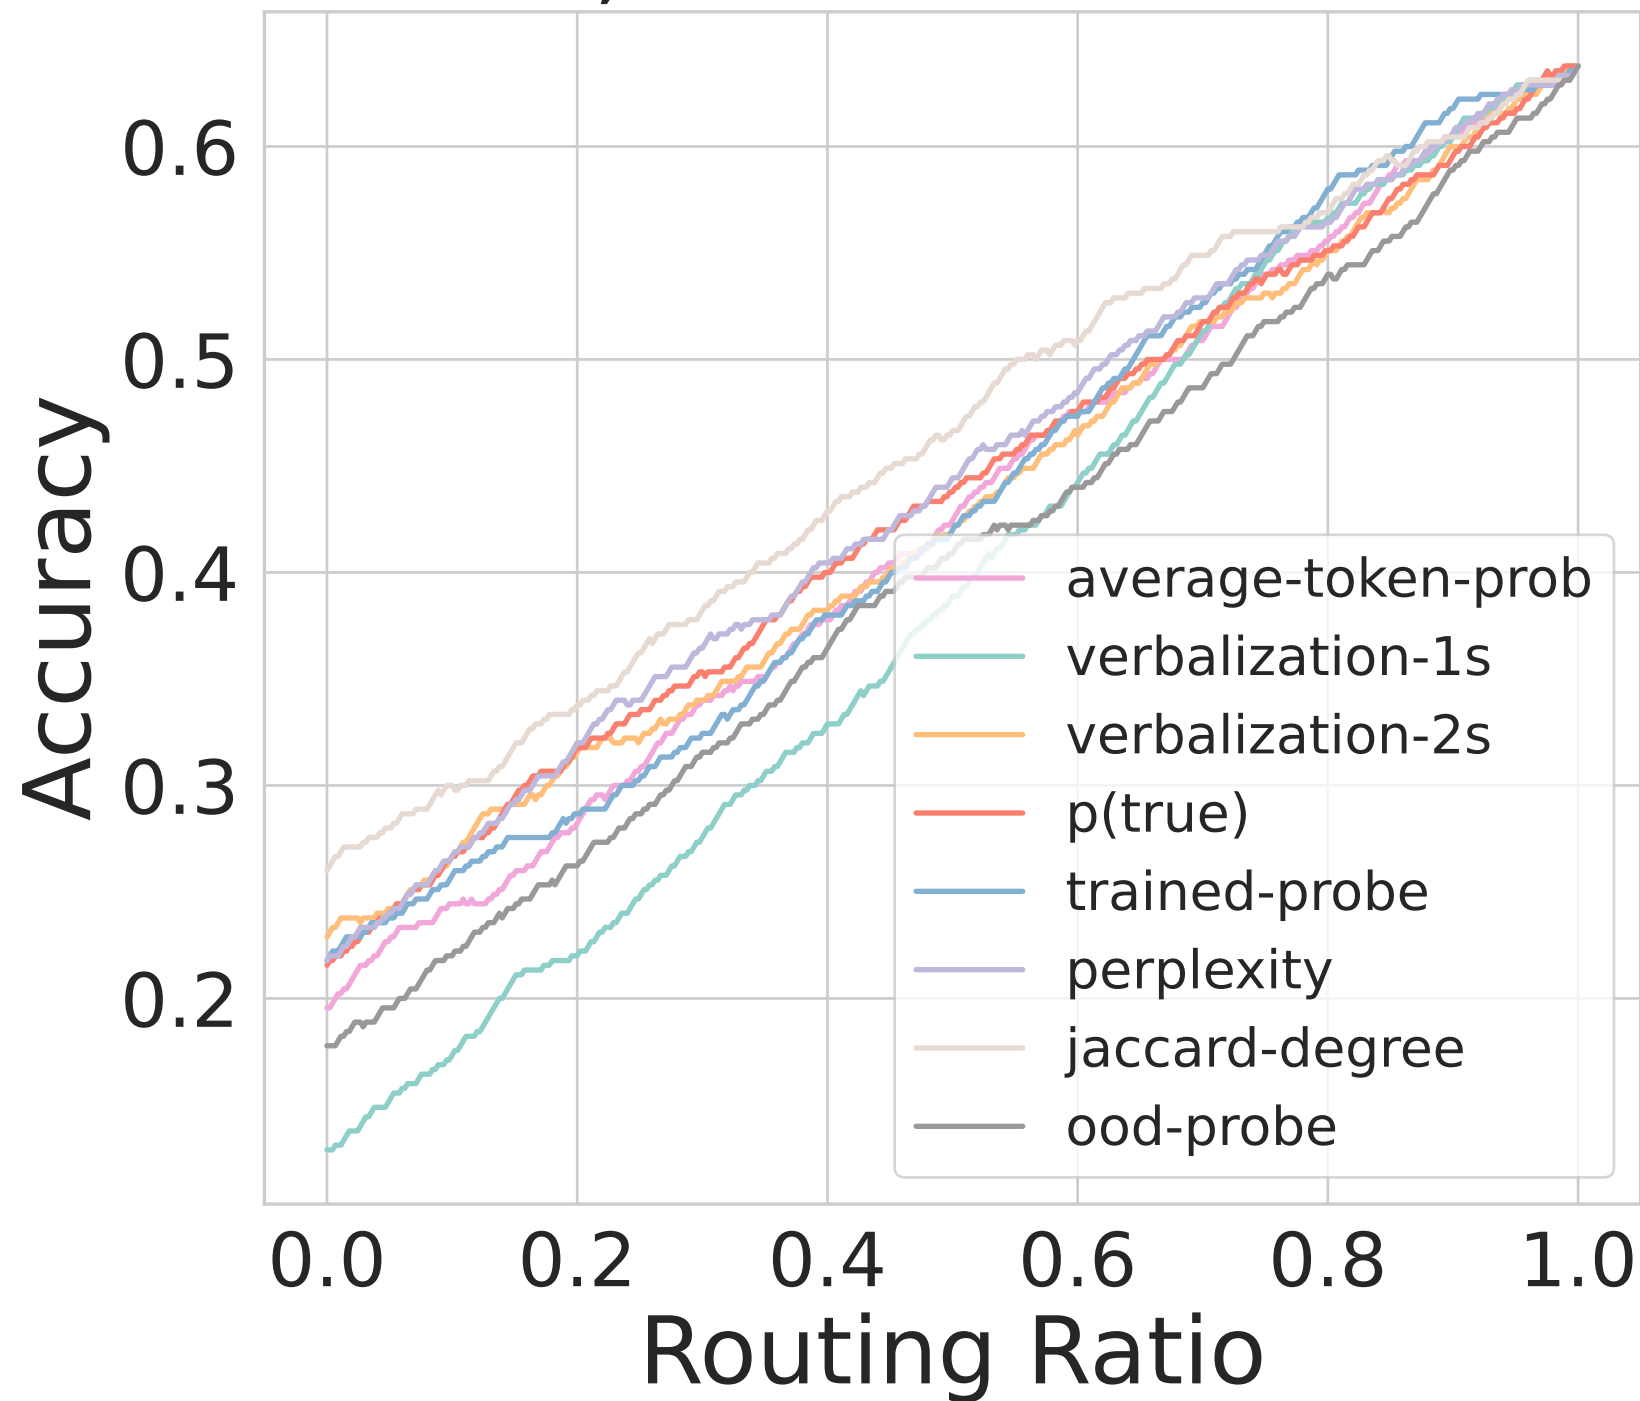

Supplement: supplementary_material [file rr_acc_math_500_llama-3.2-1b_llama70.pdf › Routing_SLM_LLMs/Uncertainty-based Routing/w_legend/to_llama70/rr_acc_math_500_llama-3.2-1b_llama70.pdf]

# MATH-500, llama-3.2-3b to Llama-3.1-70B

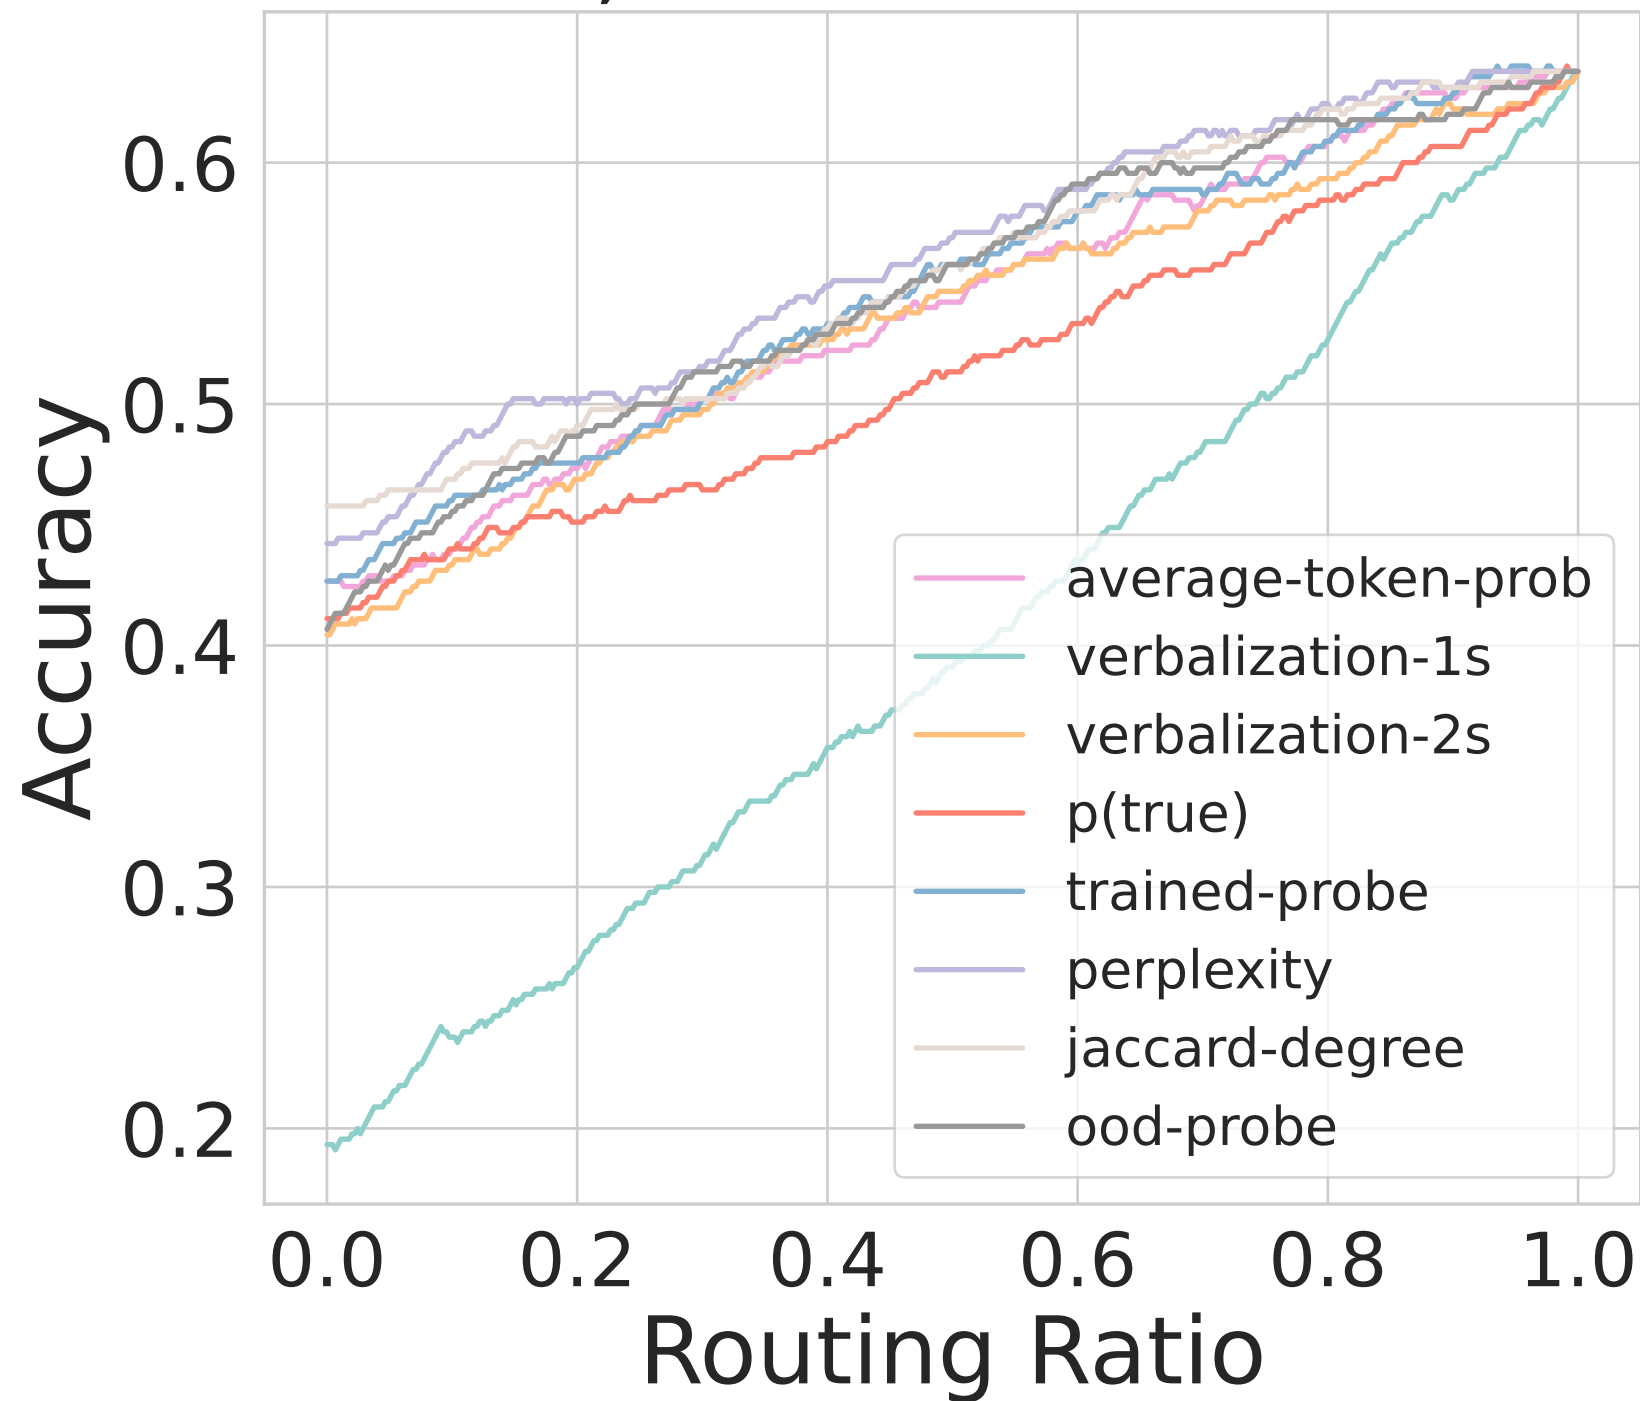

Supplement: supplementary_material [file rr_acc_math_500_llama-3.2-3b_llama70.pdf › Routing_SLM_LLMs/Uncertainty-based Routing/w_legend/to_llama70/rr_acc_math_500_llama-3.2-3b_llama70.pdf]

# MATH-500, mistral-7b to Llama-3.1-70B

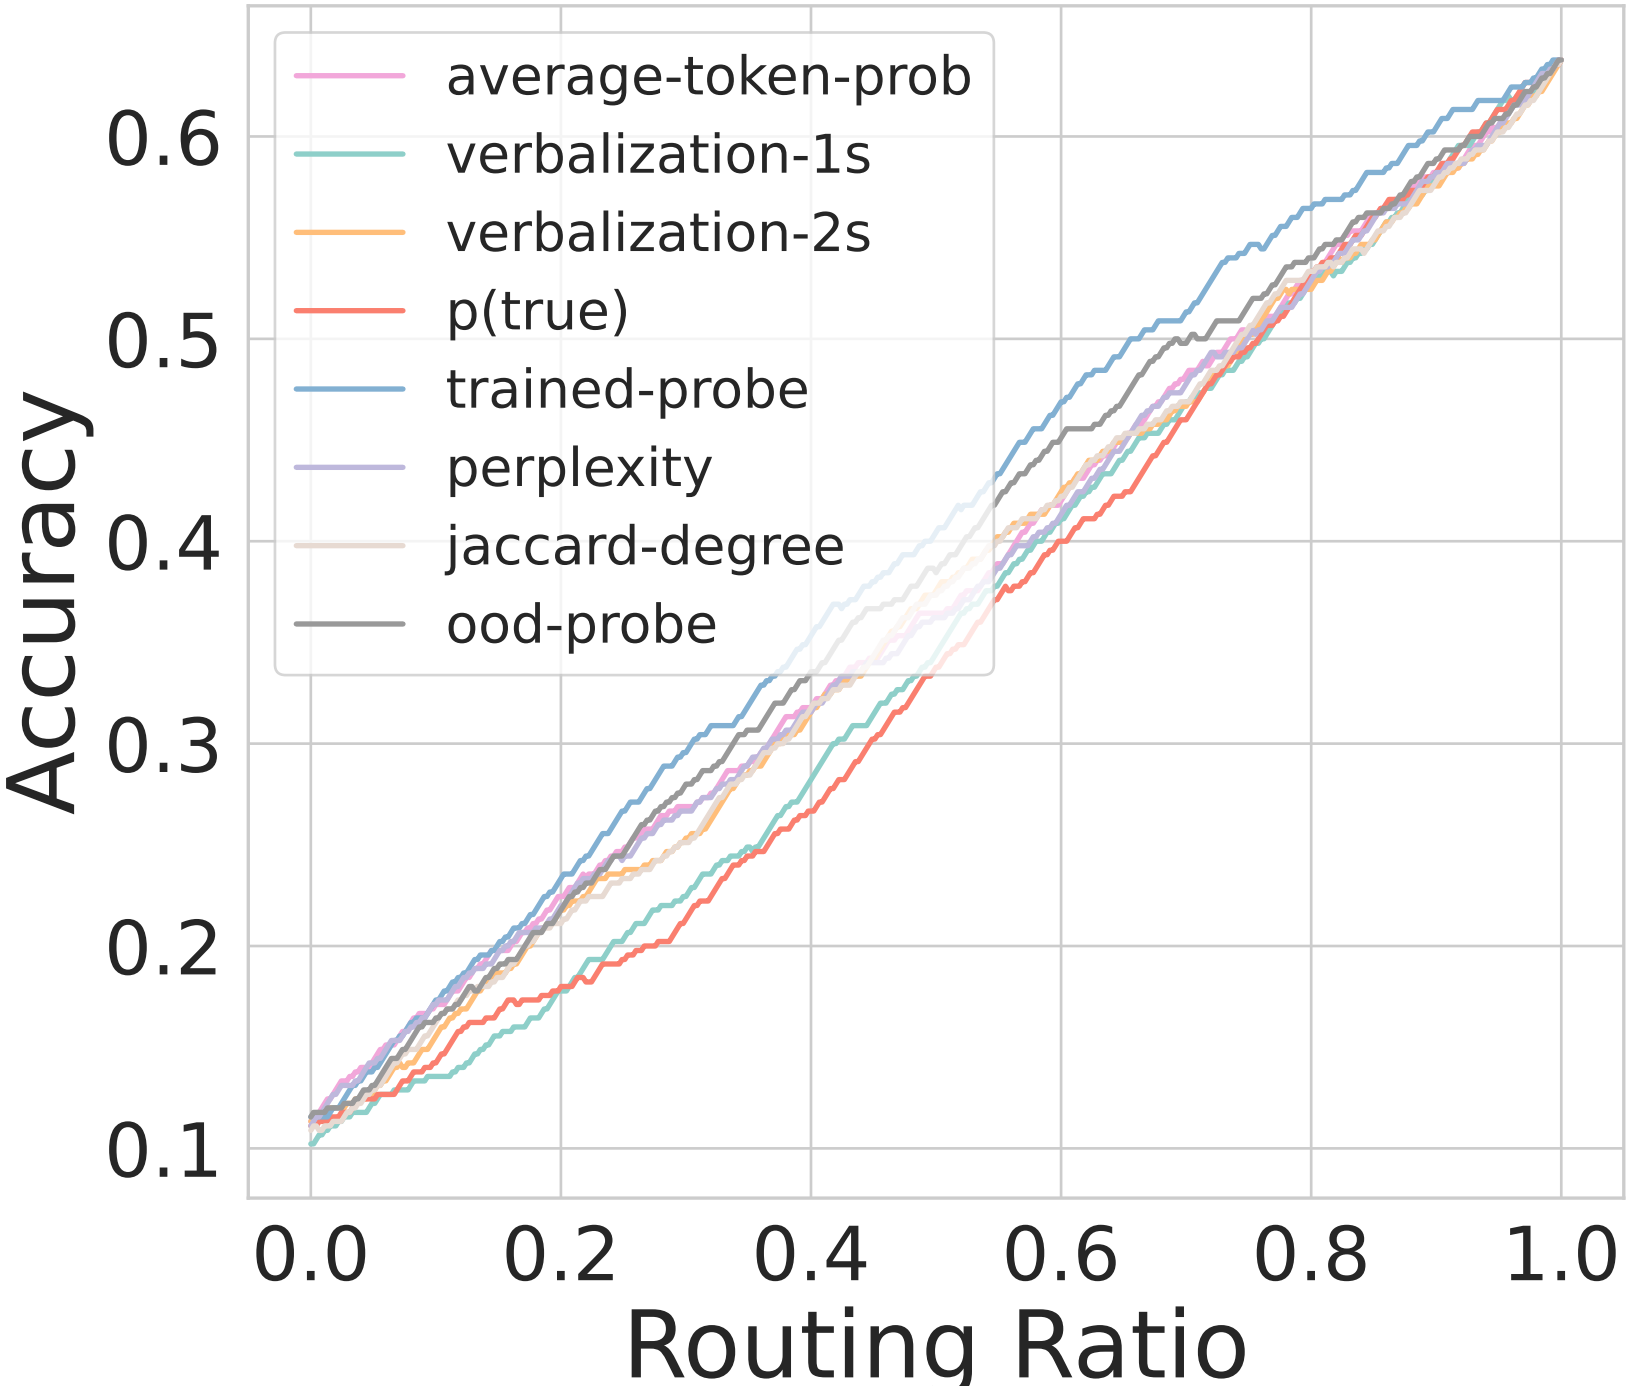

Supplement: supplementary_material [file rr_acc_math_500_mistral-7b_llama70.pdf › Routing_SLM_LLMs/Uncertainty-based Routing/w_legend/to_llama70/rr_acc_math_500_mistral-7b_llama70.pdf]

# MATH-500, phi-3.5-mini to Llama-3.1-70B

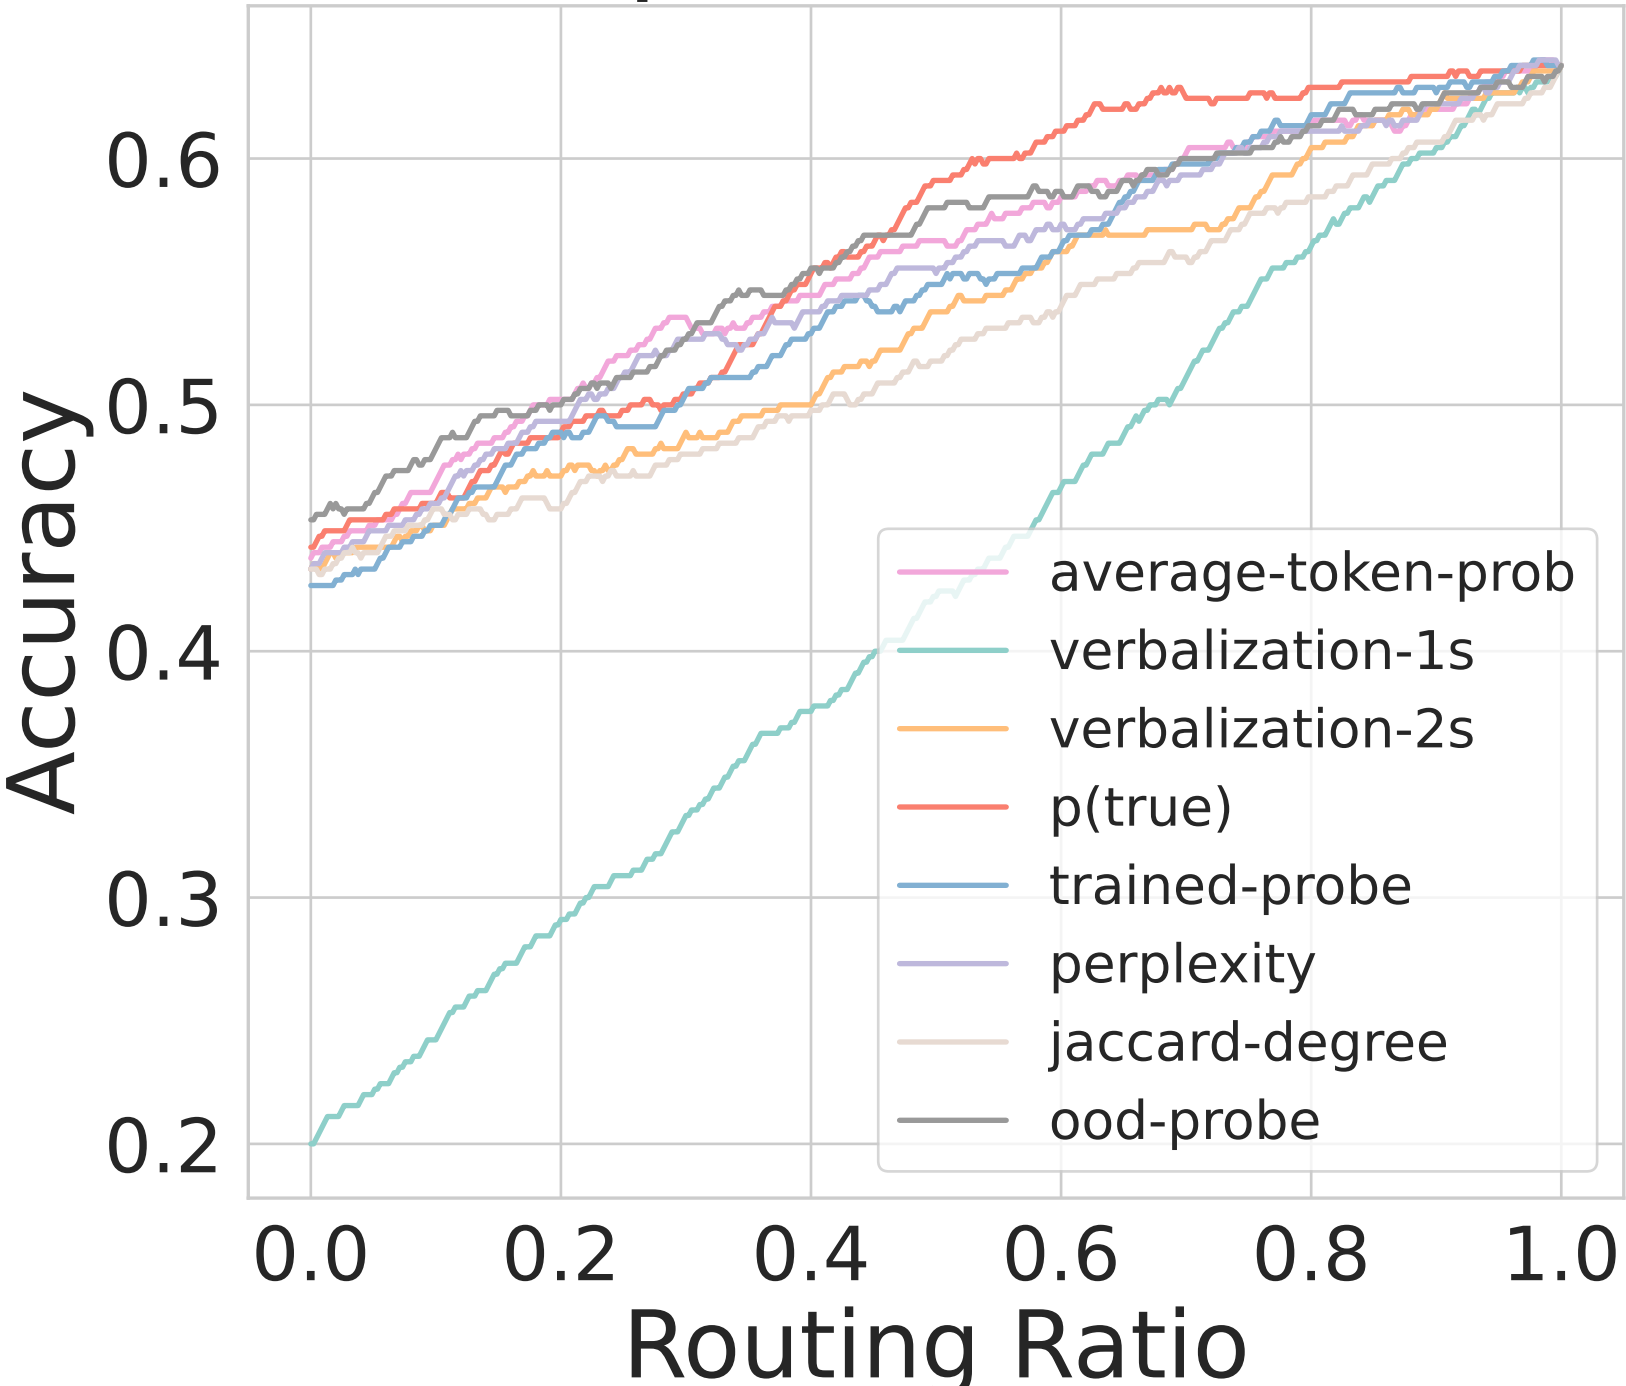

Supplement: supplementary_material [file rr_acc_math_500_phi-3.5-mini_llama70.pdf › Routing_SLM_LLMs/Uncertainty-based Routing/w_legend/to_llama70/rr_acc_math_500_phi-3.5-mini_llama70.pdf]

# MATH-500, phi-4-mini-reasoning to Llama-3.1-70B

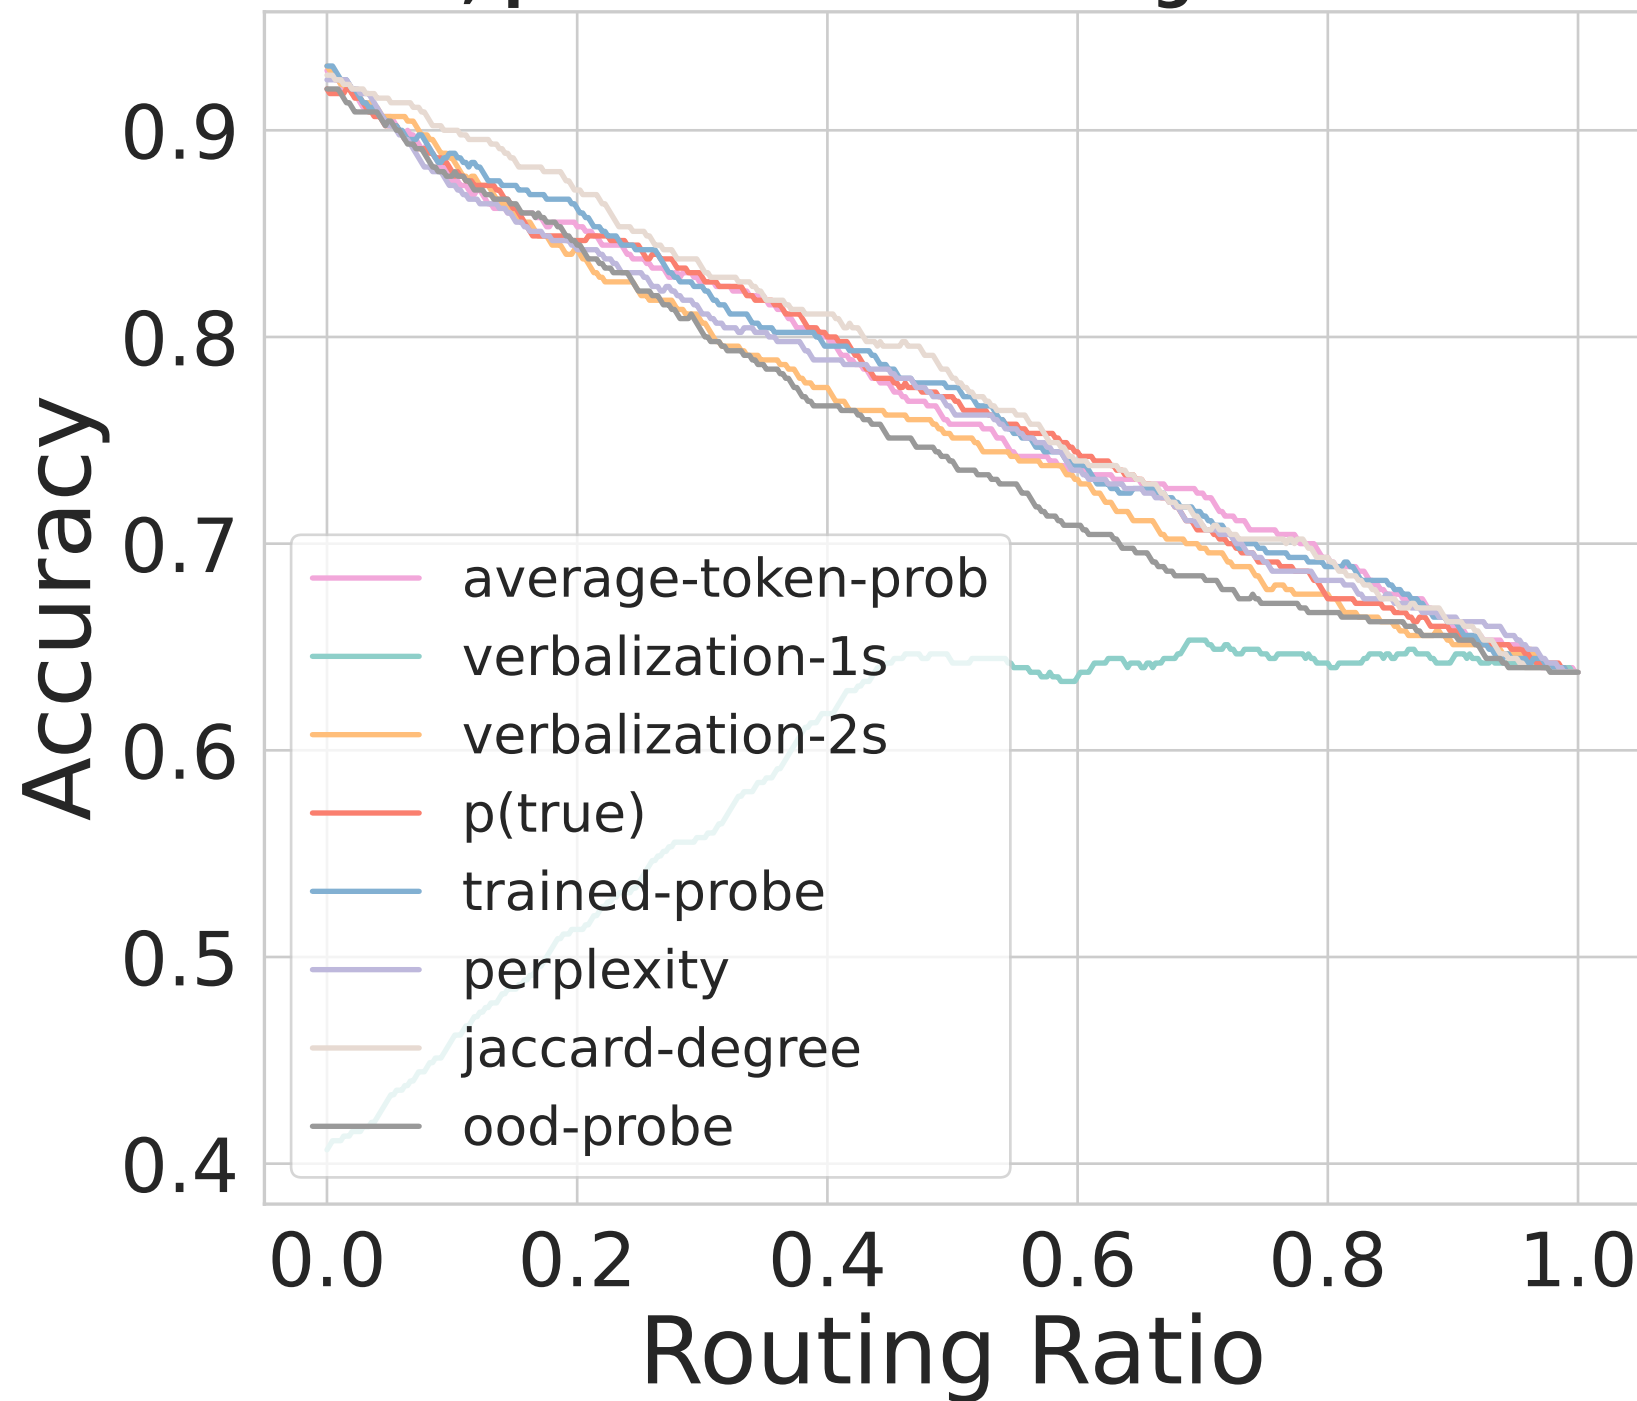

Supplement: supplementary_material [file rr_acc_math_500_phi-4-mini-reasoning_llama70.pdf › Routing_SLM_LLMs/Uncertainty-based Routing/w_legend/to_llama70/rr_acc_math_500_phi-4-mini-reasoning_llama70.pdf]

**MATH-500, qwen-2.5-7b to Llama-3.1-70B**

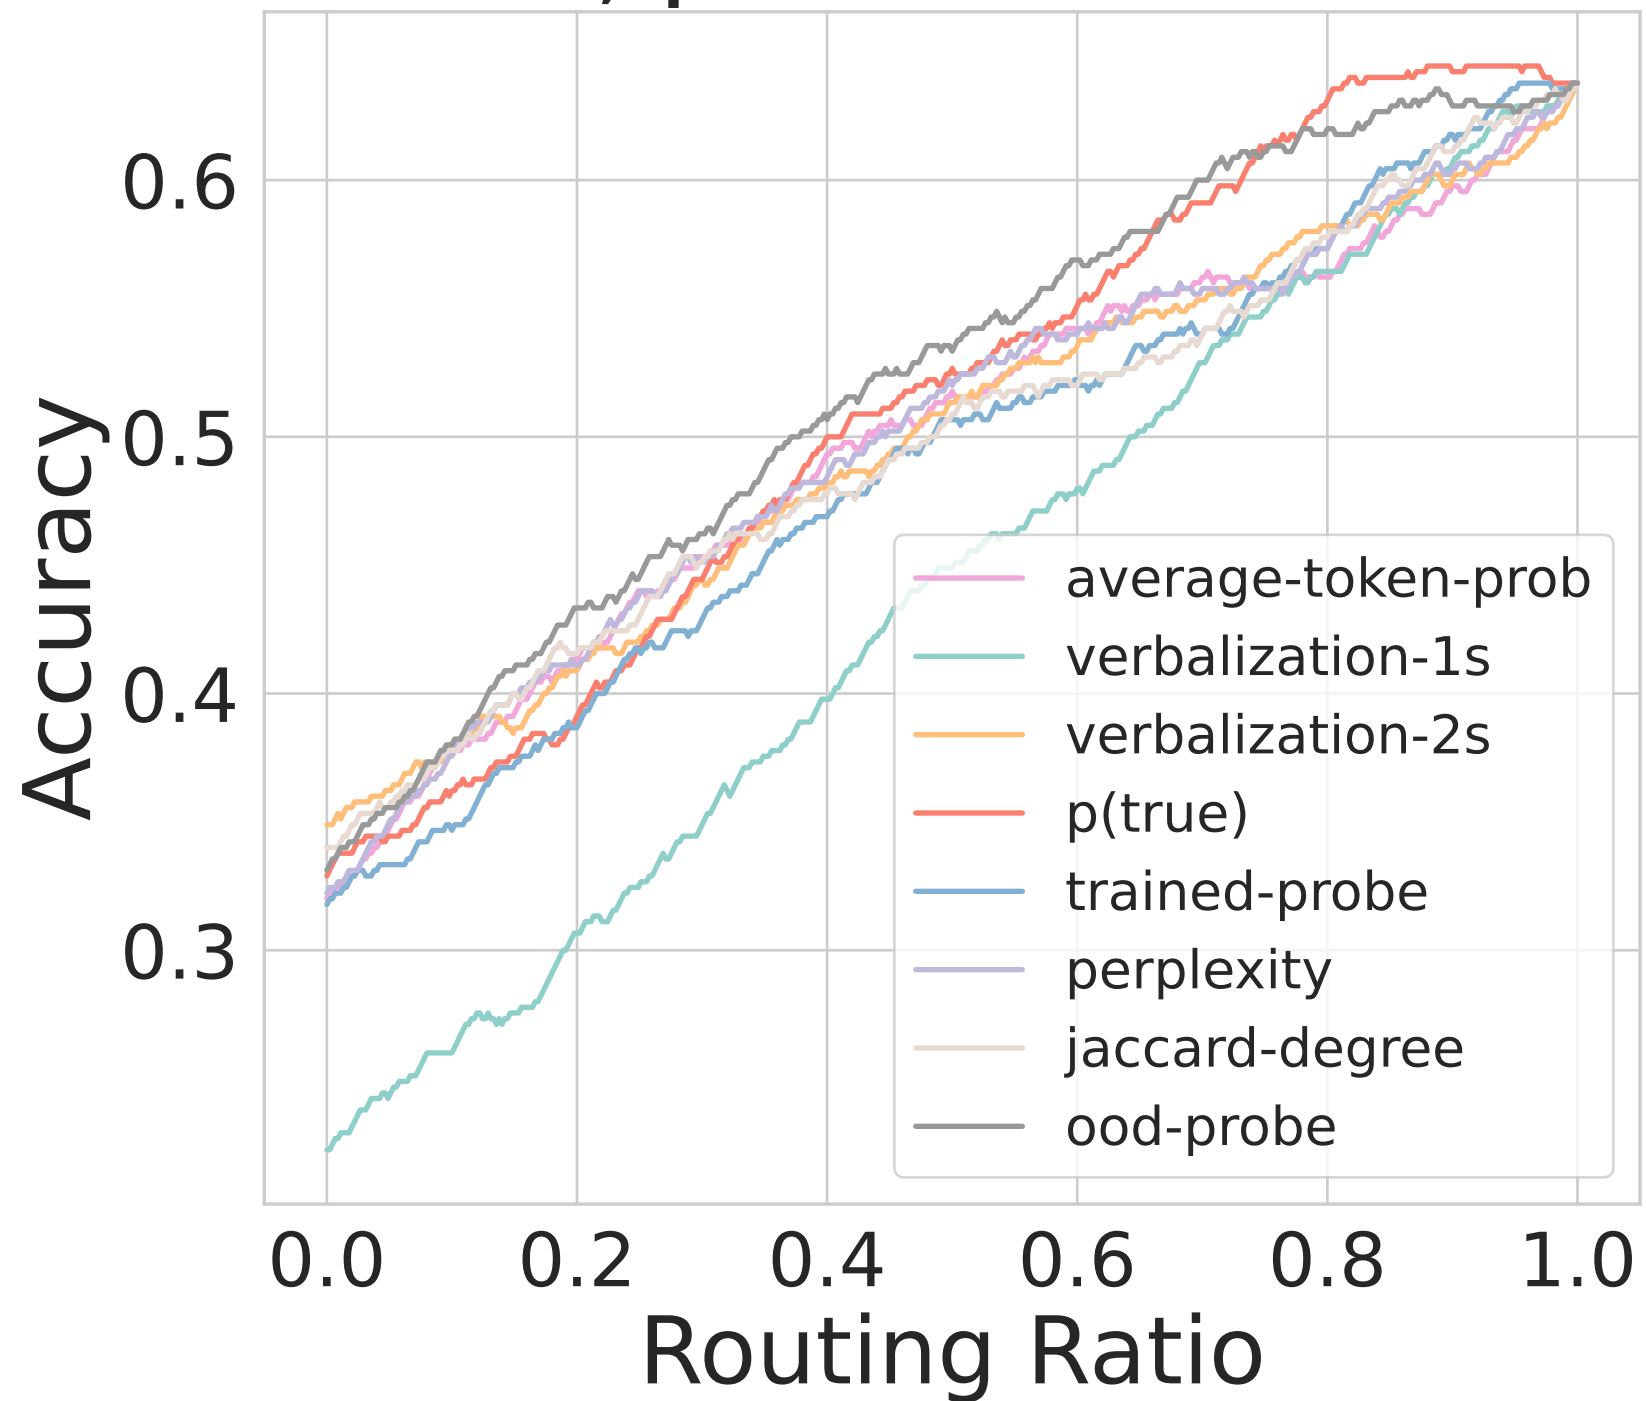

Supplement: supplementary_material [file rr_acc_math_500_qwen-2.5-7b_llama70.pdf › Routing_SLM_LLMs/Uncertainty-based Routing/w_legend/to_llama70/rr_acc_math_500_qwen-2.5-7b_llama70.pdf]
